# Supplementary material
Source: publisher site journal article supplement (https://www.degruyterbrill.com/publication/isbn/9783110432879/downloadAsset/9783110432879_Elektronischer_Anhang_2.zip)
Supplement: Supplementary file 86 [file SAP GB 2010.pdf › Korpustexte/Korpustexte pdf/SAP/SAP GB 2010.pdf]

# MEHR ERREICHEN

GESCHÄFTSBERICHT 2010

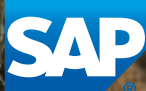

The Best-Run Businesses Run SAP®

Erfolgreiche Unternehmen wissen, wie man Chancen erkennt – und nutzt. Was zählt, sind transparente Informationen, Handlungsfähigkeit und Geschwindigkeit. Genau darum setzen Firmen jeder Größe und in allen Branchen auf SAP. Unsere Lösungen und Services helfen 109.000 Kunden in 120 Ländern, Marktschwankungen vorauszusehen, flexibel zu reagieren und schnell Innovationen herauszubringen. Damit sie sicher auf Erfolgskurs bleiben, steht unsere Software ganz nach Bedarf zur Verfügung – über das Unternehmenssystem vor Ort, als On-Demand-Lösung über das Internet oder unterwegs auf dem Mobilgerät.

**Mit SAP wird jede Veränderung zur Chance, noch mehr zu erreichen.**

## **2 Best-Run Businesses**

Mehr Flexibilität – Commonwealth Bank of Australia  
Mehr Tempo – eBay Inc.  
Mehr (Nähr)Wert – Sambazon  
Mehr Überblick – Sinopec  
Mehr Präzision – WMF

## **13 An unsere Aktionäre**

Brief von den Vorstandssprechern  
Vorstand  
Investor Relations  
Corporate-Governance-Bericht  
Bericht des Aufsichtsrats  
Vergütungsbericht  
Erklärung des Vorstands  
Bestätigungsvermerk des Abschlussprüfers

## **65 Zusammengefasster Konzernlagebericht**

Der SAP-Konzern  
Software- und Serviceportfolio  
Kunden  
Forschung und Entwicklung  
Partnernetzwerk  
Akquisitionen  
Mitarbeiter  
Änderungen in der Geschäftsleitung  
Grundlagen der finanzbezogenen Lageberichterstattung  
Wirtschaftliche Rahmenbedingungen  
Vermögens-, Finanz- und Ertragslage  
Nachhaltigkeit  
Vermögens-, Finanz- und Ertragslage der SAP AG  
Gesamtaussage zur wirtschaftlichen Lage der SAP  
Corporate Governance  
Übernahmerelevante Angaben  
Risikobericht  
Maßnahmen und Ereignisse nach Geschäftsjahresende  
Ausblick

## **165 Konzernabschluss**

Konzern-Gewinn- und Verlustrechnung  
Konzerngesamtergebnisrechnung  
Konzernbilanz  
Konzerneigenkapitalveränderungsrechnung  
Konzernkapitalflussrechnung  
Konzernanhang  
Bericht des Vorstands zum internen Kontrollsystem  
für die Finanzberichterstattung im Konzernabschluss

## **275 Zusätzliche Informationen**

Fünfjahresübersicht  
Glossar  
Adressen  
Publikationen für unsere Aktionäre  
Finanzkalender  
Impressum

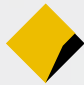

# MEHR FLEXIBILITÄT

Für ihr landesweites Netzwerk von über 1.000 Filialen und 4.000 Bankautomaten brauchte die australische Commonwealth Bank of Australia (CBA) ein modernes, leistungsfähiges Kernbanksystem. Mit SAP for Banking verfügt die CBA jetzt über neue Möglichkeiten, ihre Produkte und Dienstleistungen flexibel anzubieten – jederzeit und überall.

## **Immer erreichbar**

CBA ist führender Anbieter von Finanzdienstleistungen mit dem größten Vertriebsnetz in ganz Australien. Um diesen Vorsprung zu halten, setzt die Bank auf intensive Kundennähe. Die landesweit neu eingeführten SAP-Funktionen unterstützen sie dabei: Die CBA bietet ihren Kunden nun mehr Kontaktpunkte als ihre nächsten Wettbewerber und ist damit auch in puncto Erreichbarkeit Spitzenreiter.

## **Agil**

Damit ihr Netzwerk weiter wachsen und agil bleiben kann, nutzt die CBA die hochleistungsfähige Bankenplattform der SAP – mit SAP for Banking, SAP Deposits Management und künftig auch SAP Loans Management. Auf dieser Basis lassen sich alle Vorgänge schnell, sicher und reibungslos abwickeln. Und das hilft der Commonwealth Bank, überall für ihre Kunden da zu sein.

## **Erfahren Sie mehr:**

[www.sapannualreport.com/2010/cba](http://www.sapannualreport.com/2010/cba)



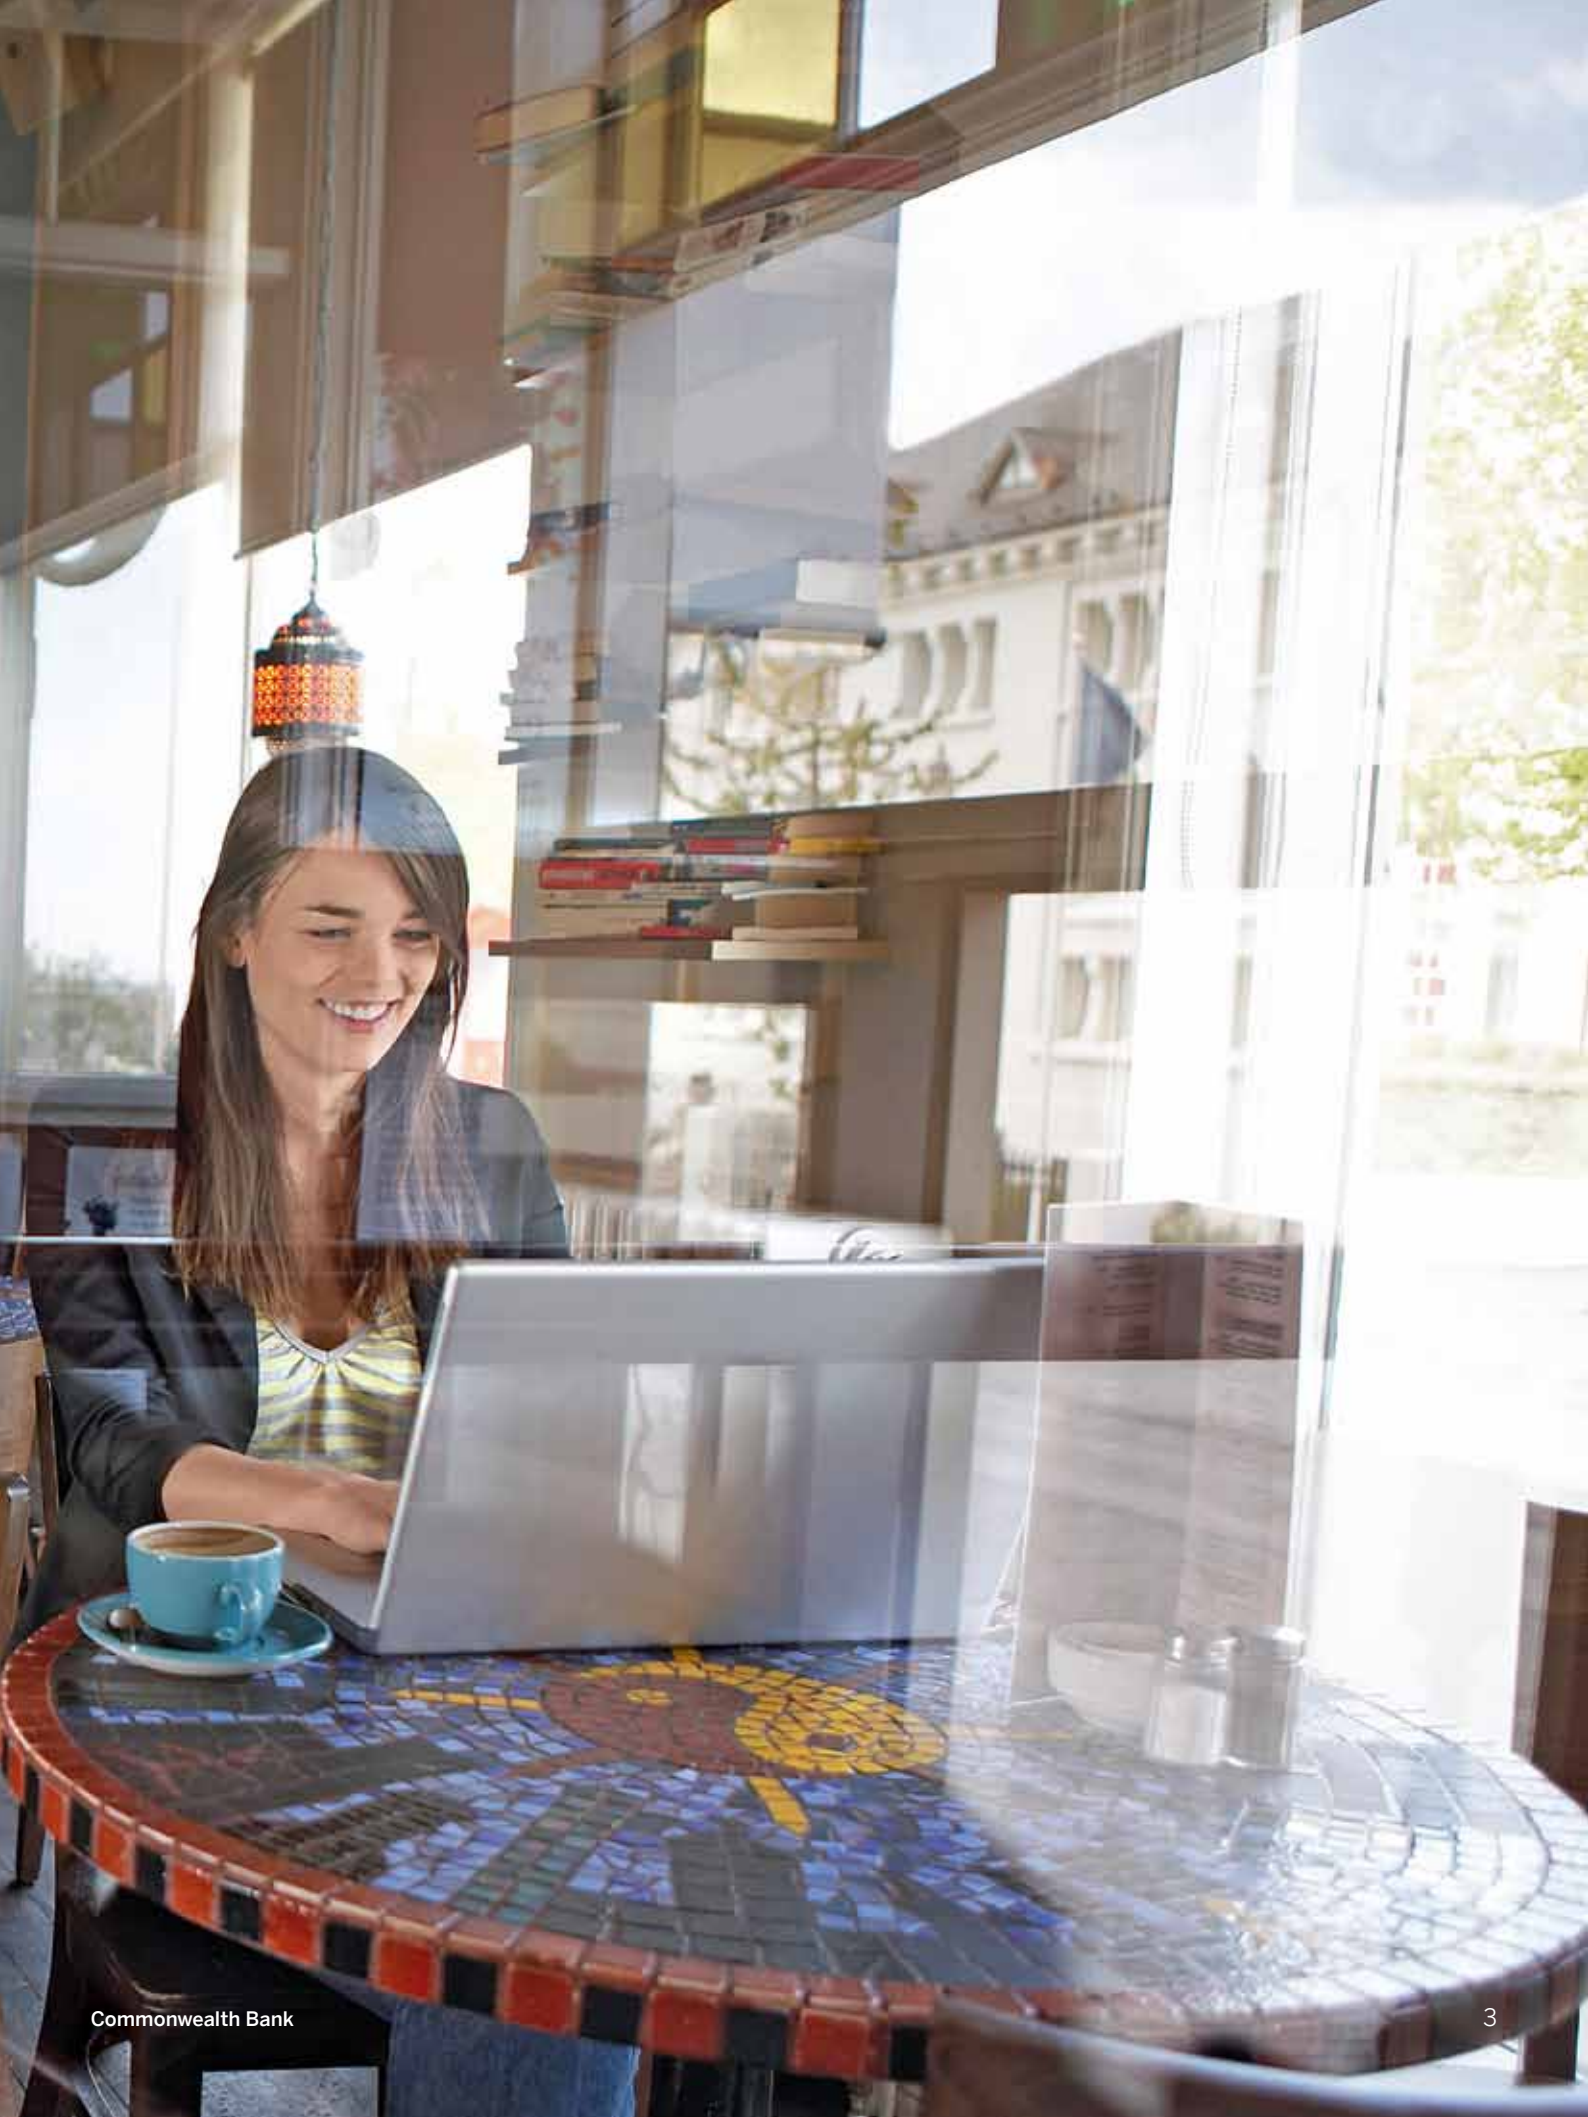

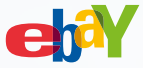

# MEHR TEMPO

**Um Zahlungen schneller und günstiger abzuwickeln, wollte eBay Inc. sein PayPal-System nun auch für Lieferantenrechnungen einsetzen. Ein SAP-Entwicklungsteam unterstützte das Internetunternehmen bei der Integration von PayPal in die bestehende SAP-ERP-Finanzanwendung. Jetzt begleicht eBay Inc. Rechnungen im Handumdrehen.**

## **Weltweit im Handel**

eBay Inc. wurde 1995 gegründet und ist weltweit führend im Onlinehandel und -Zahlungsverkehr. Als bekannteste Marke des Unternehmens gilt eBay, der größte Internetmarktplatz der Welt, auf dem praktisch jeder alles rund um die Uhr kaufen und verkaufen kann. 2002 übernahm eBay den Weltmarktführer im Bereich Onlinezahlungen PayPal. Mit PayPal können Privatpersonen und Unternehmen sicher, schnell und einfach Zahlungen über eine E-Mail-Adresse anweisen und empfangen.

## **Sekundenschnell**

Was gut für die eBay-Kunden ist, ist auch gut für eBay Inc. Deshalb beschloss das Unternehmen, die Rechnungen seiner Lieferanten über PayPal zu bezahlen. Ein SAP-Team griff eBay Inc. unter die Arme und integrierte PayPal als innovative und flexible Zahlungsform in die vorhandene SAP-ERP-Financials-Anwendung. Nach nur sechs Wochen wurden damit Zahlungen in Sekundenschnelle möglich. eBay Inc. kann nun häufiger Skonto nutzen und profitiert von niedrigeren Transaktionskosten – und seine Lieferanten haben schneller ihr Geld auf dem Konto.

## **Erfahren Sie mehr:**

**[www.sapannualreport.com/2010/ebay](http://www.sapannualreport.com/2010/ebay)**



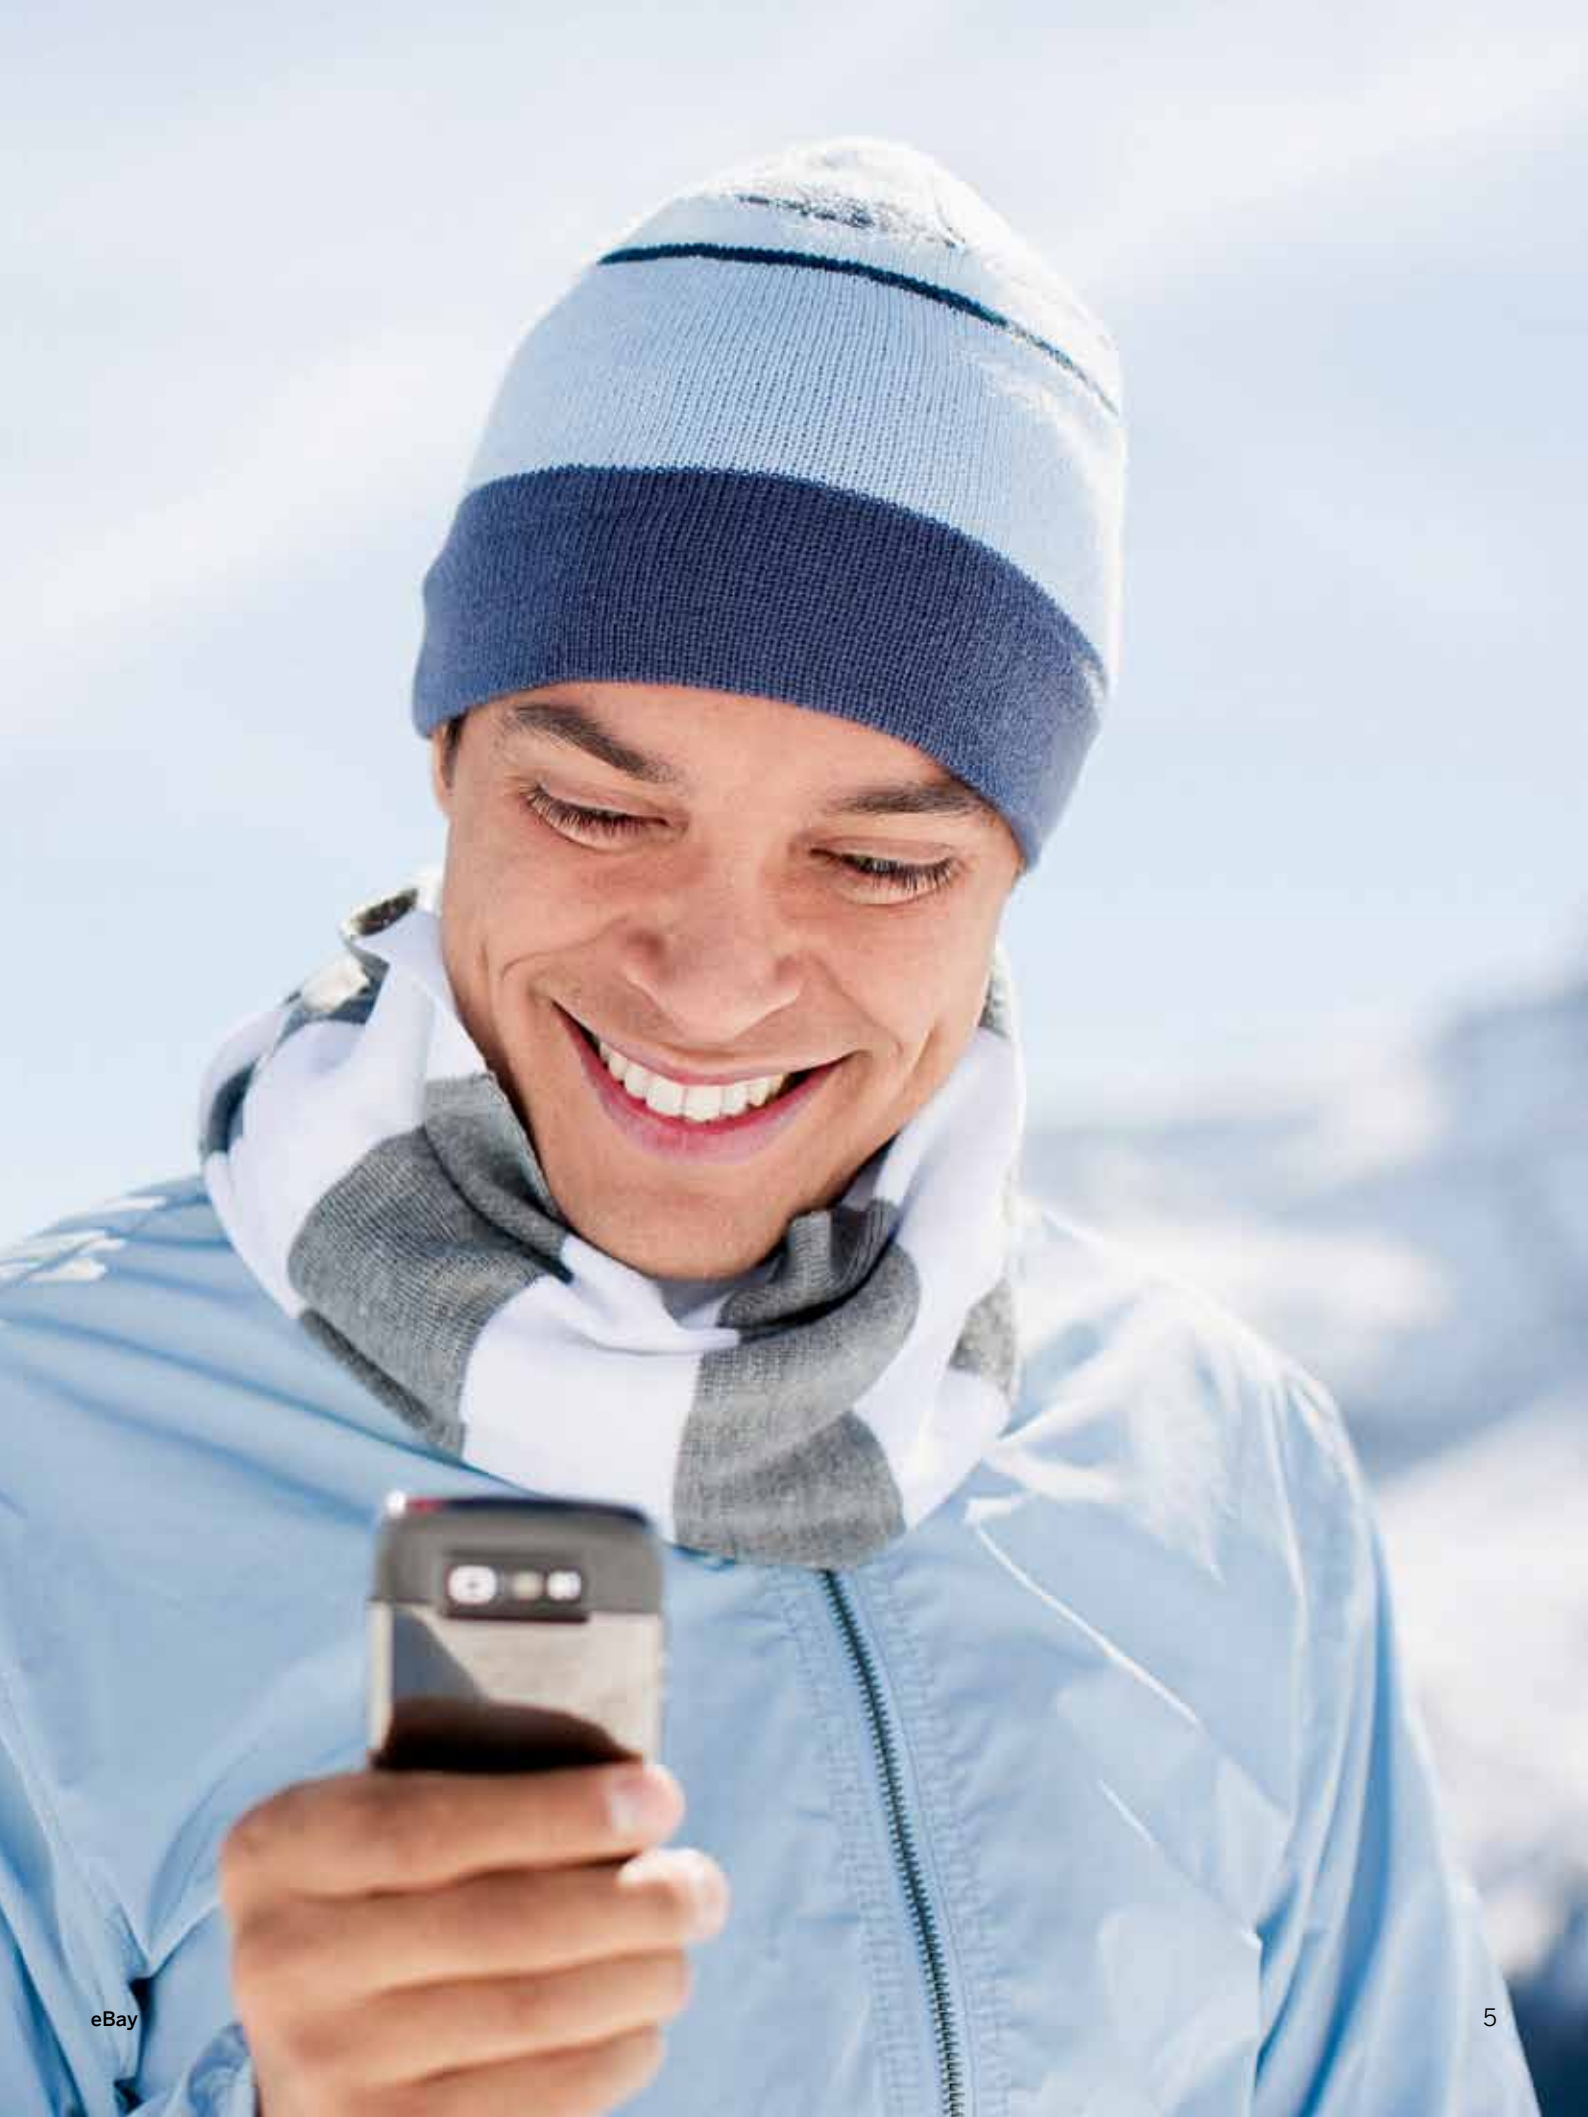



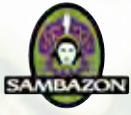

# MEHR (NÄHR)WERT

**Biosaft-Hersteller Sambazon suchte eine Lösung, die mit seinem unbändigen Wachstum von 50 % mithalten konnte. Mit SAP Business ByDesign hat das energiegeladene Unternehmen nun seine Lieferkette, sein Finanzmanagement und alle anderen Geschäftsvorgänge unter Kontrolle – sodass der Gewinn weiter sprudelt.**

## **Rasant**

Sambazon stellt Biosäfte und Nahrungsergänzungsmittel aus speziellen Frucht- und Pflanzenmischungen her. Zum Einsatz kommt unter anderem die Açaí-Beere, die vorwiegend im Regenwald des Amazonas wächst und wegen ihres besonders hohen Nährwertgehalts geschätzt wird. Das rasant wachsende Unternehmen besteht zwar erst seit knapp zehn Jahren, verkauft seine Fruchtsorbets und Smoothies aber bereits in über 10.000 Naturkostläden, Lebensmittelgeschäften und Saftbars in den USA.

## **Nachhaltig**

Mit SAP Business ByDesign will Sambazon seine Beschaffung und Produktverfügbarkeit optimieren und gleichzeitig das Geschäftsrisiko mindern. Zudem sollen alle Prozesse transparenter und straffer organisiert werden. So bleibt der wirtschaftliche Gewinn gesichert und Sambazon kann sich ganz auf den ökologischen und gesellschaftlichen Mehrwert konzentrieren – und mit der Açaí-Ernte über 10.000 einheimischen Bauern eine lohnende Alternative zum Holzhandel bieten sowie 6.769 Hektar Regenwald vor der Abholzung bewahren.

## **Erfahren Sie mehr:**

[www.sapannualreport.com/2010/sambazon](http://www.sapannualreport.com/2010/sambazon)



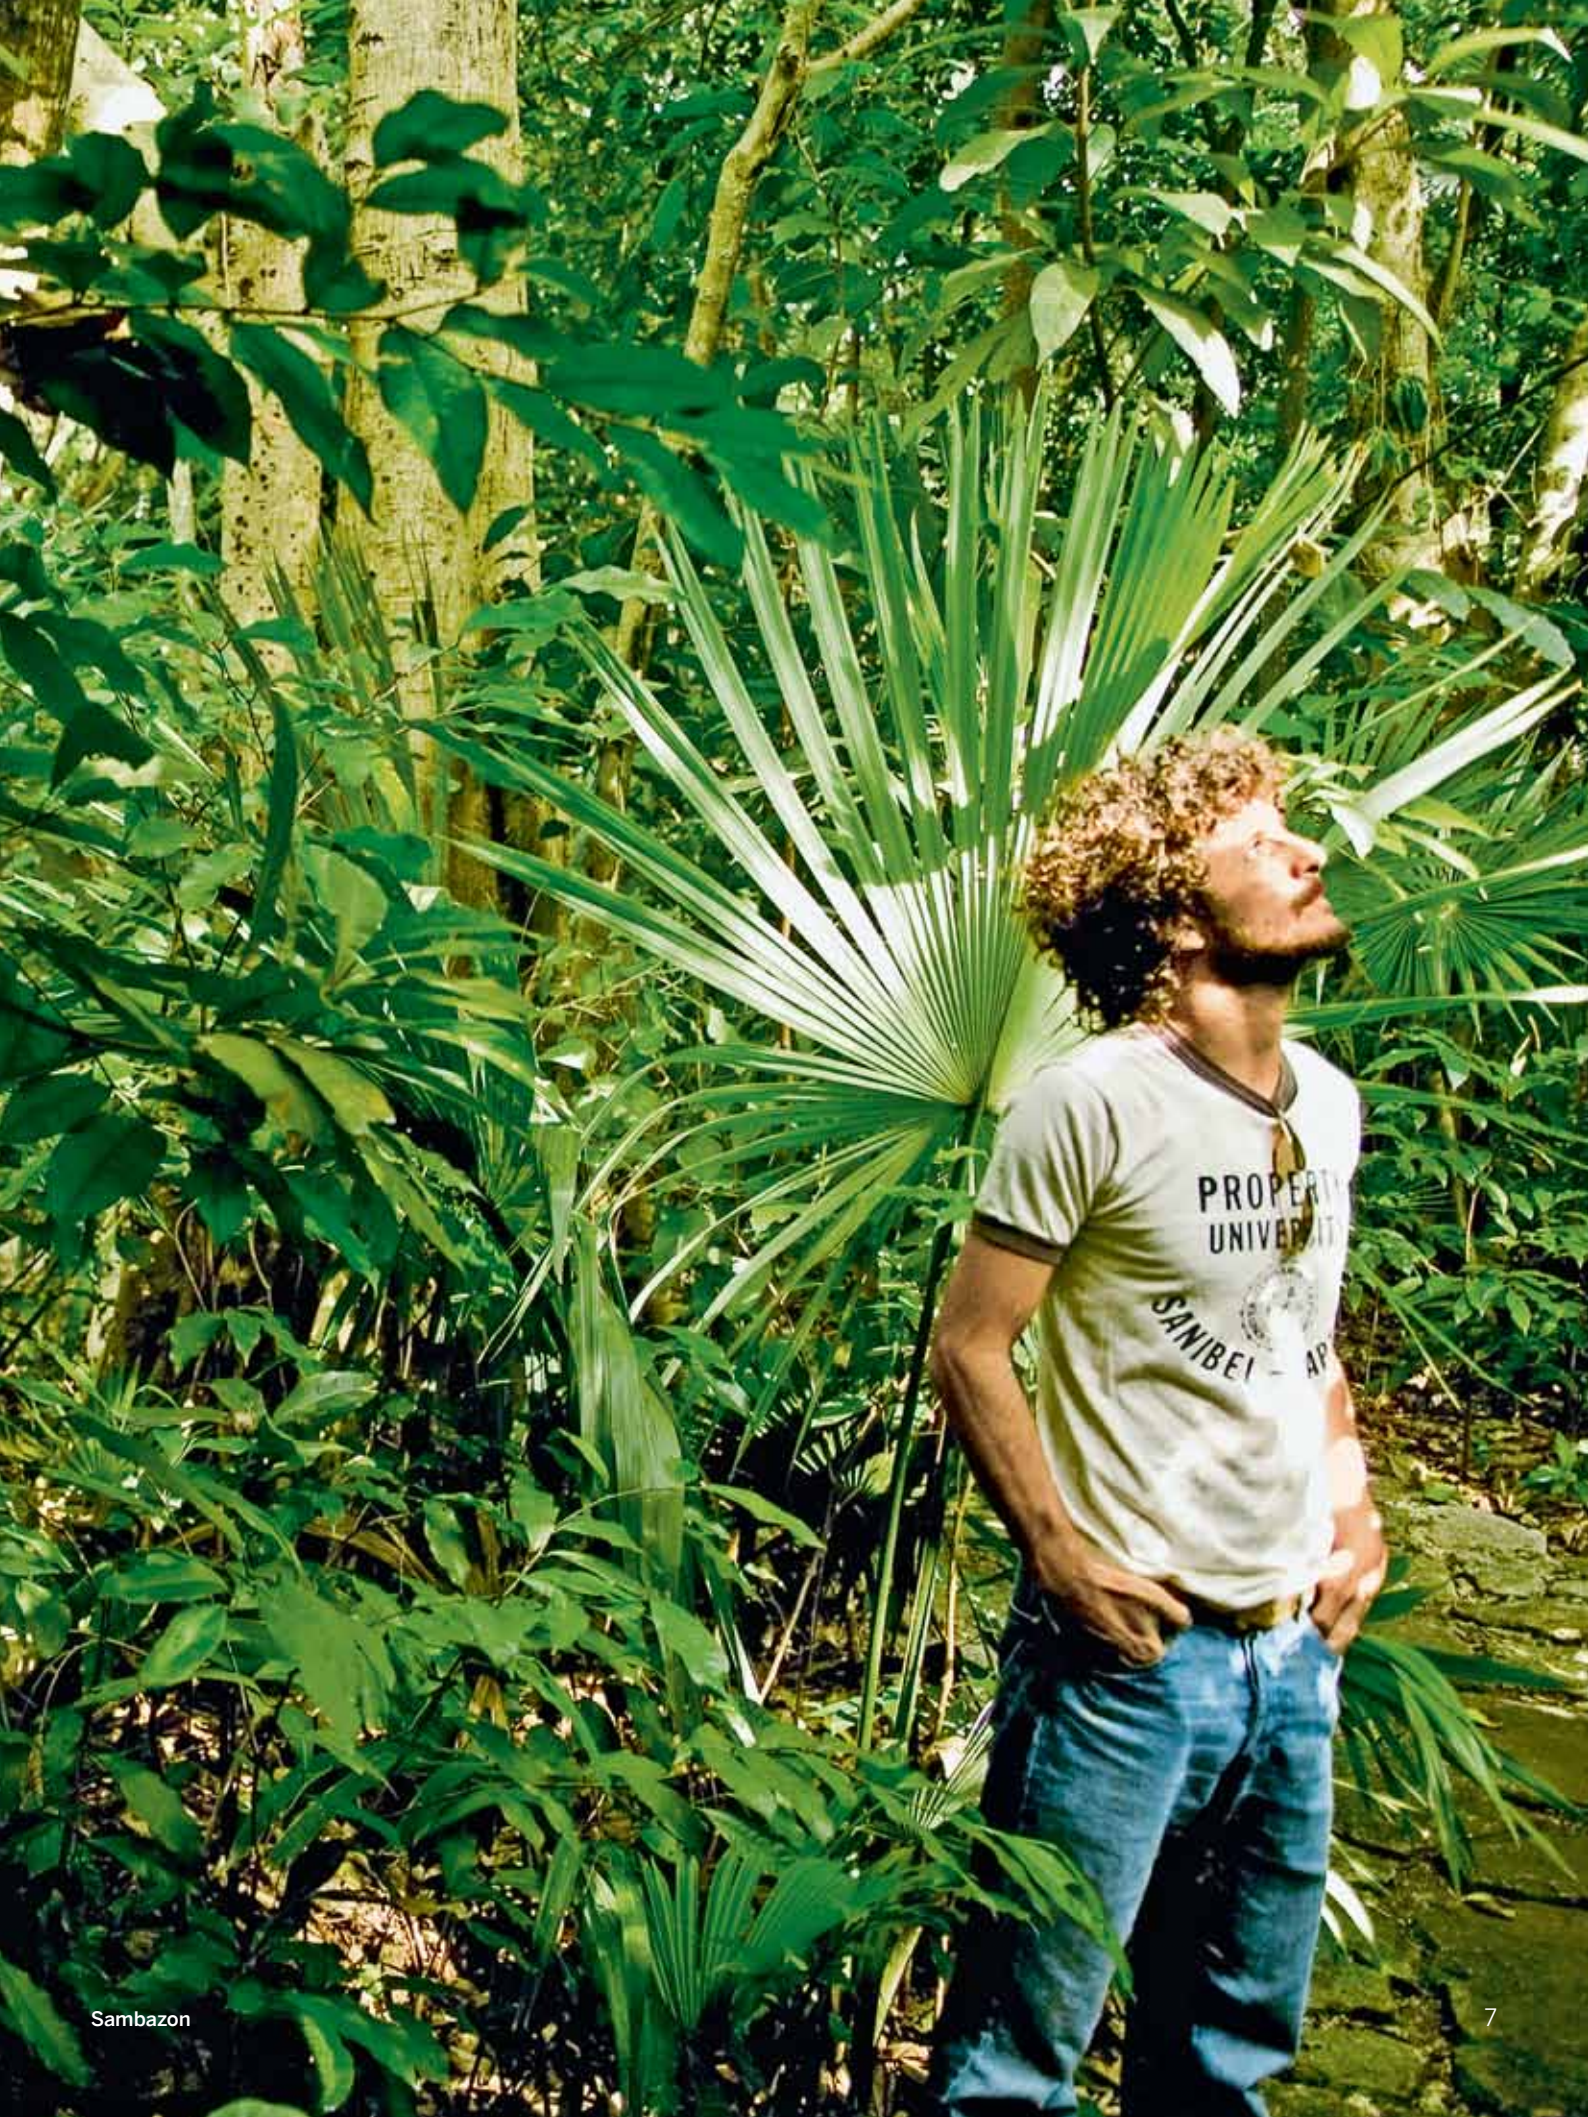



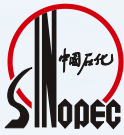

# MEHR ÜBERBLICK

Nach ihrer Neustrukturierung und ihrem Börsengang stand die China Petroleum & Chemical Corporation (Sinopec) vor der Aufgabe, ihre weitläufigen Unternehmensprozesse zu zentralisieren. SAP ermöglicht Sinopec nun eine zentrale Sicht auf sein Inlands- und Exportgeschäft – sowie eine globale Gesamtperspektive.

## Übersichtlich

Der Mineralölkonzern, mit 300.000 Mitarbeitern einer der größten in China, deckt das gesamte Up- und Downstream-Geschäft ab: von der Erschließung und Verarbeitung des Rohöls bis hin zum Vertrieb. Seit seiner Neustrukturierung und dem Börsengang ist Sinopec in der Fortune-Rangliste der 500 umsatzstärksten Unternehmen von Rang 23 im Jahr 2006 auf Platz 7 im Jahr 2010 vorgerückt.

## Fließend

Mit ERP- und Business-Intelligence-Anwendungen der SAP macht sich Sinopec auf den Weg zum Marktführer und arbeitet dank Standardprozessen und transparenten Geschäftsdaten jetzt deutlich wirtschaftlicher. Alle Unternehmensdaten können nun ungehindert fließen – ganz wie die eigenen Produkte.

## Erfahren Sie mehr:

[www.sapannualreport.com/2010/sinopec](http://www.sapannualreport.com/2010/sinopec)



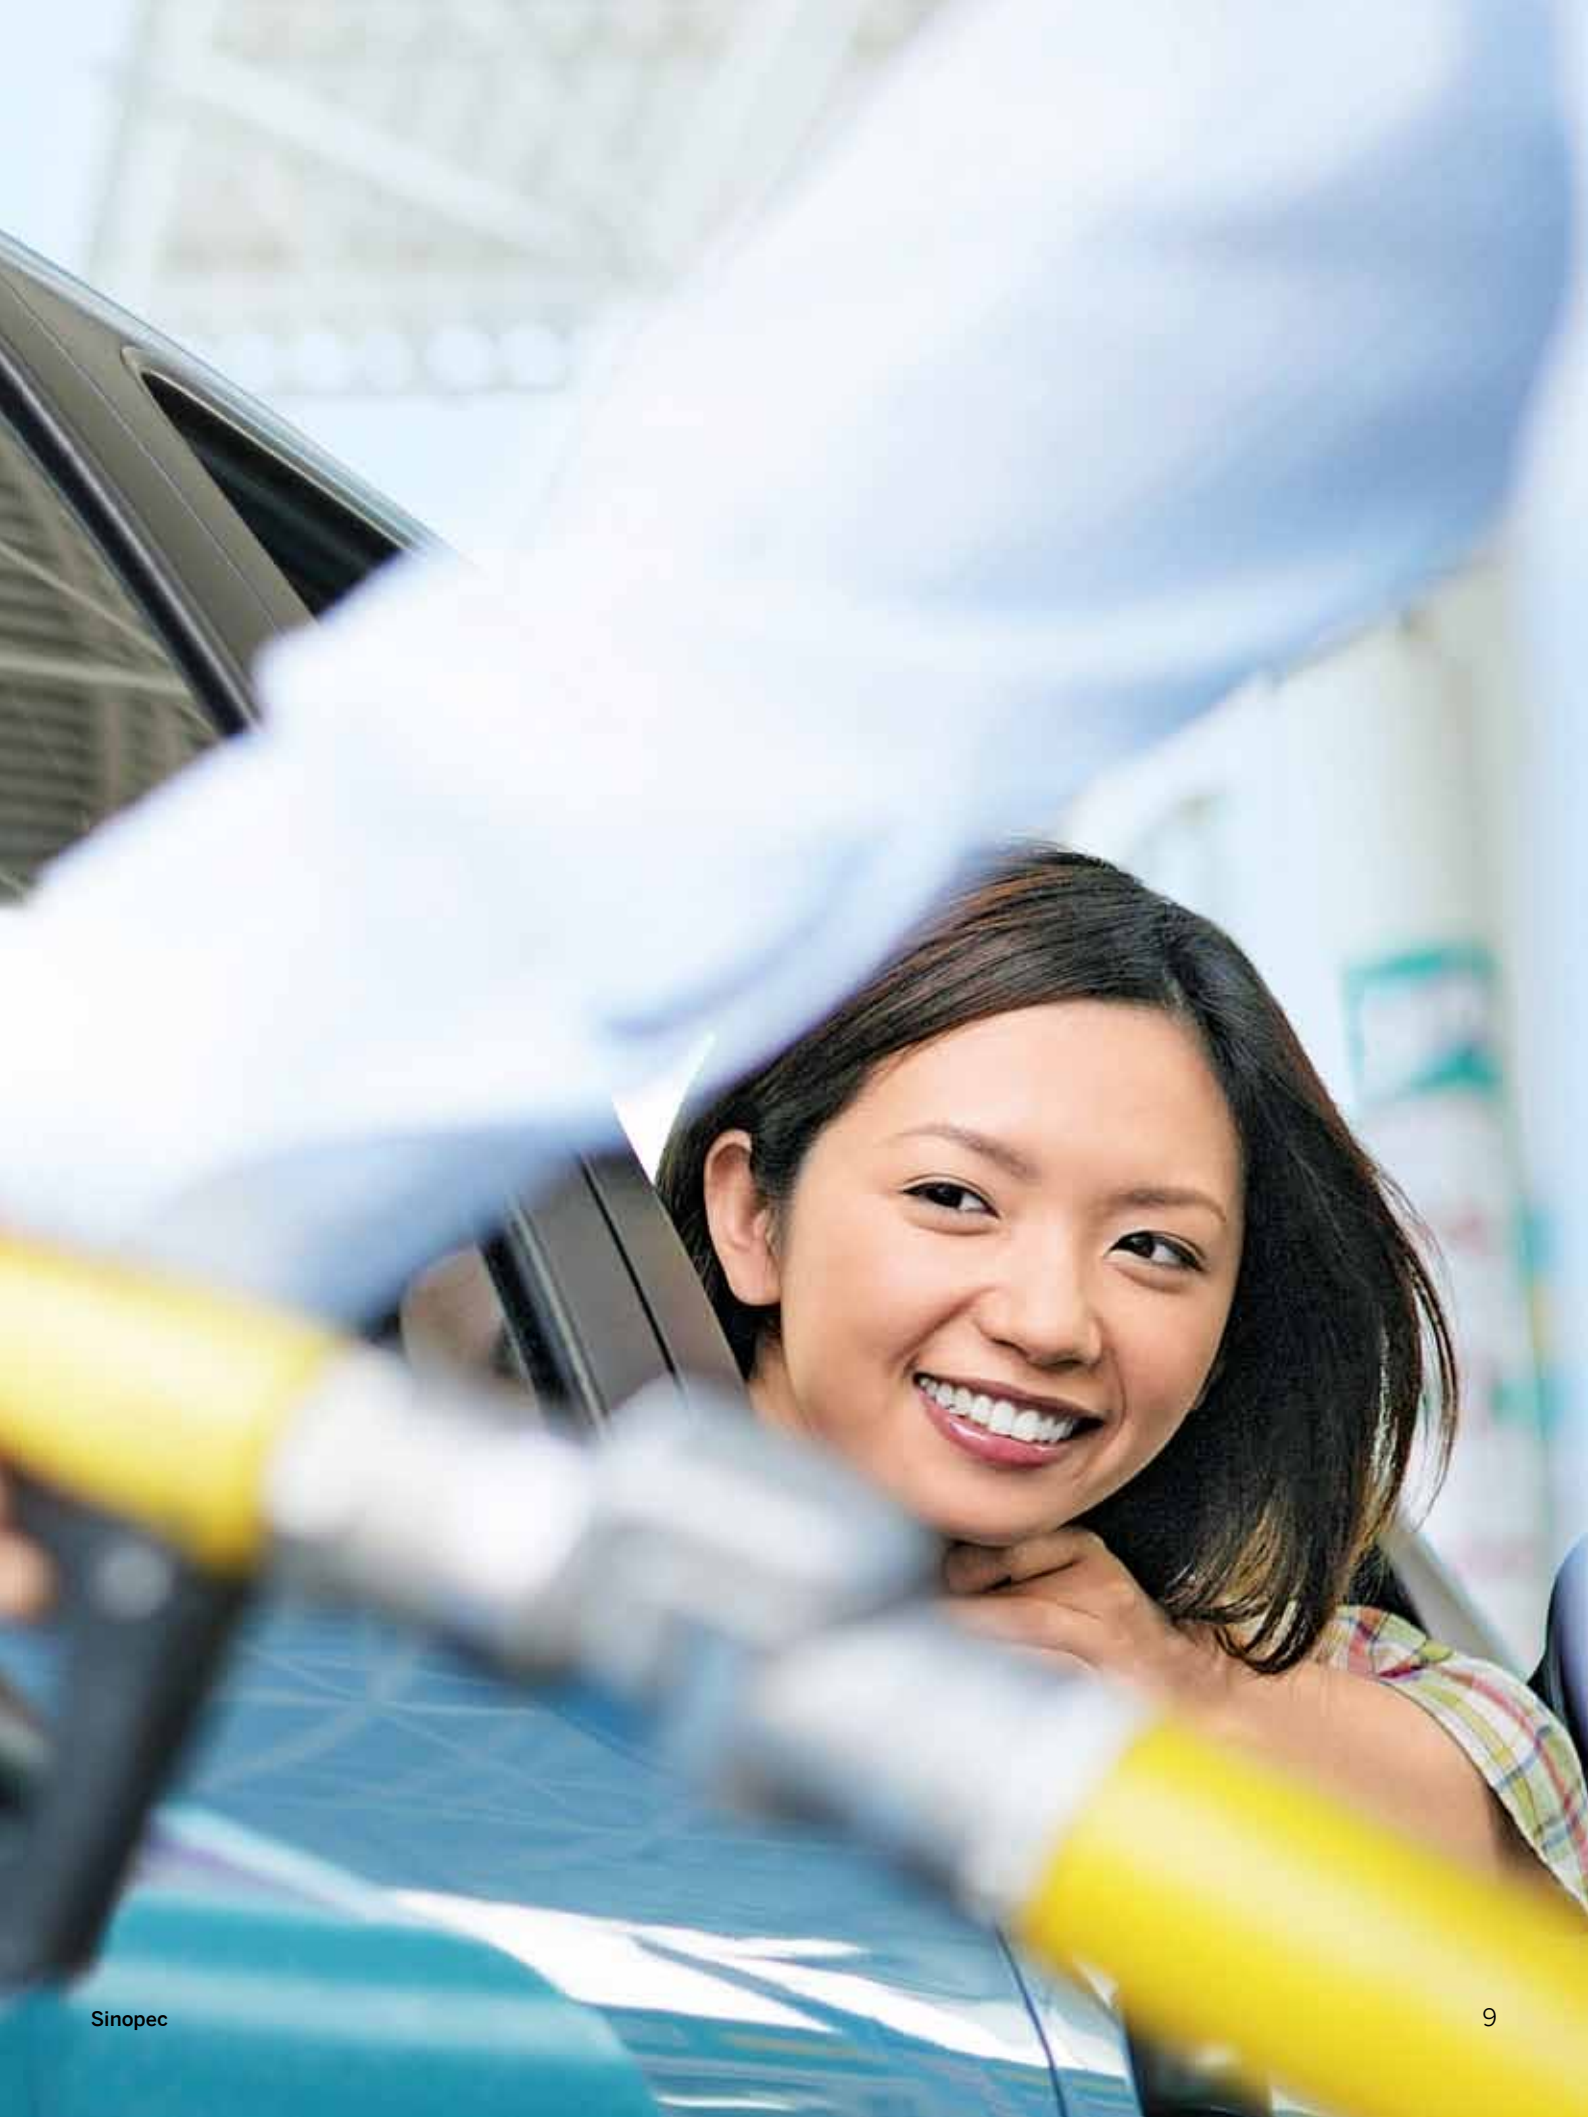

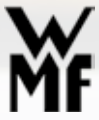

# MEHR PRÄZISION

**Der renommierte Hersteller von Haushalts-, Gastronomie- und Hotelleriewaren WMF wollte seine Qualitätsprodukte noch schneller zum Kunden bringen. Mit den umfassenden Geschäftsprozessen und Informationen von SAP CRM 7.0 erhielt er die optimalen Voraussetzungen.**

## **Traditionsreich**

Mit 6.000 Mitarbeitern erwirtschaftet die seit 1853 bestehende WMF (Württembergische Metallwarenfabrik AG) mit ihren Markenprodukten einen Umsatz von 900 Mio. €. Die Messer, Kochgeschirre, Bestecke und Kaffeeautomaten des Unternehmens gelten weltweit als Inbegriff von Design, Qualität und Funktion.

## **Transparent**

Als Meister seines Fachs bringt WMF Innovation in die Küchen und Esszimmer der Welt. Mit SAP CRM 7.0 erneuert das Traditionsunternehmen nun auch seine Geschäftsprozesse und schafft Transparenz in Bezug auf Kundendaten. Beste Rahmenbedingungen, um im Wettbewerb weiterhin die Nase vorn zu haben. WMF kann nun individuell auf den Geschmack des Kunden eingehen – und sein Erfolgsrezept weltweit fort-schreiben.

## **Erfahren Sie mehr:**

[www.sapannualreport.com/2010/wmf](http://www.sapannualreport.com/2010/wmf)



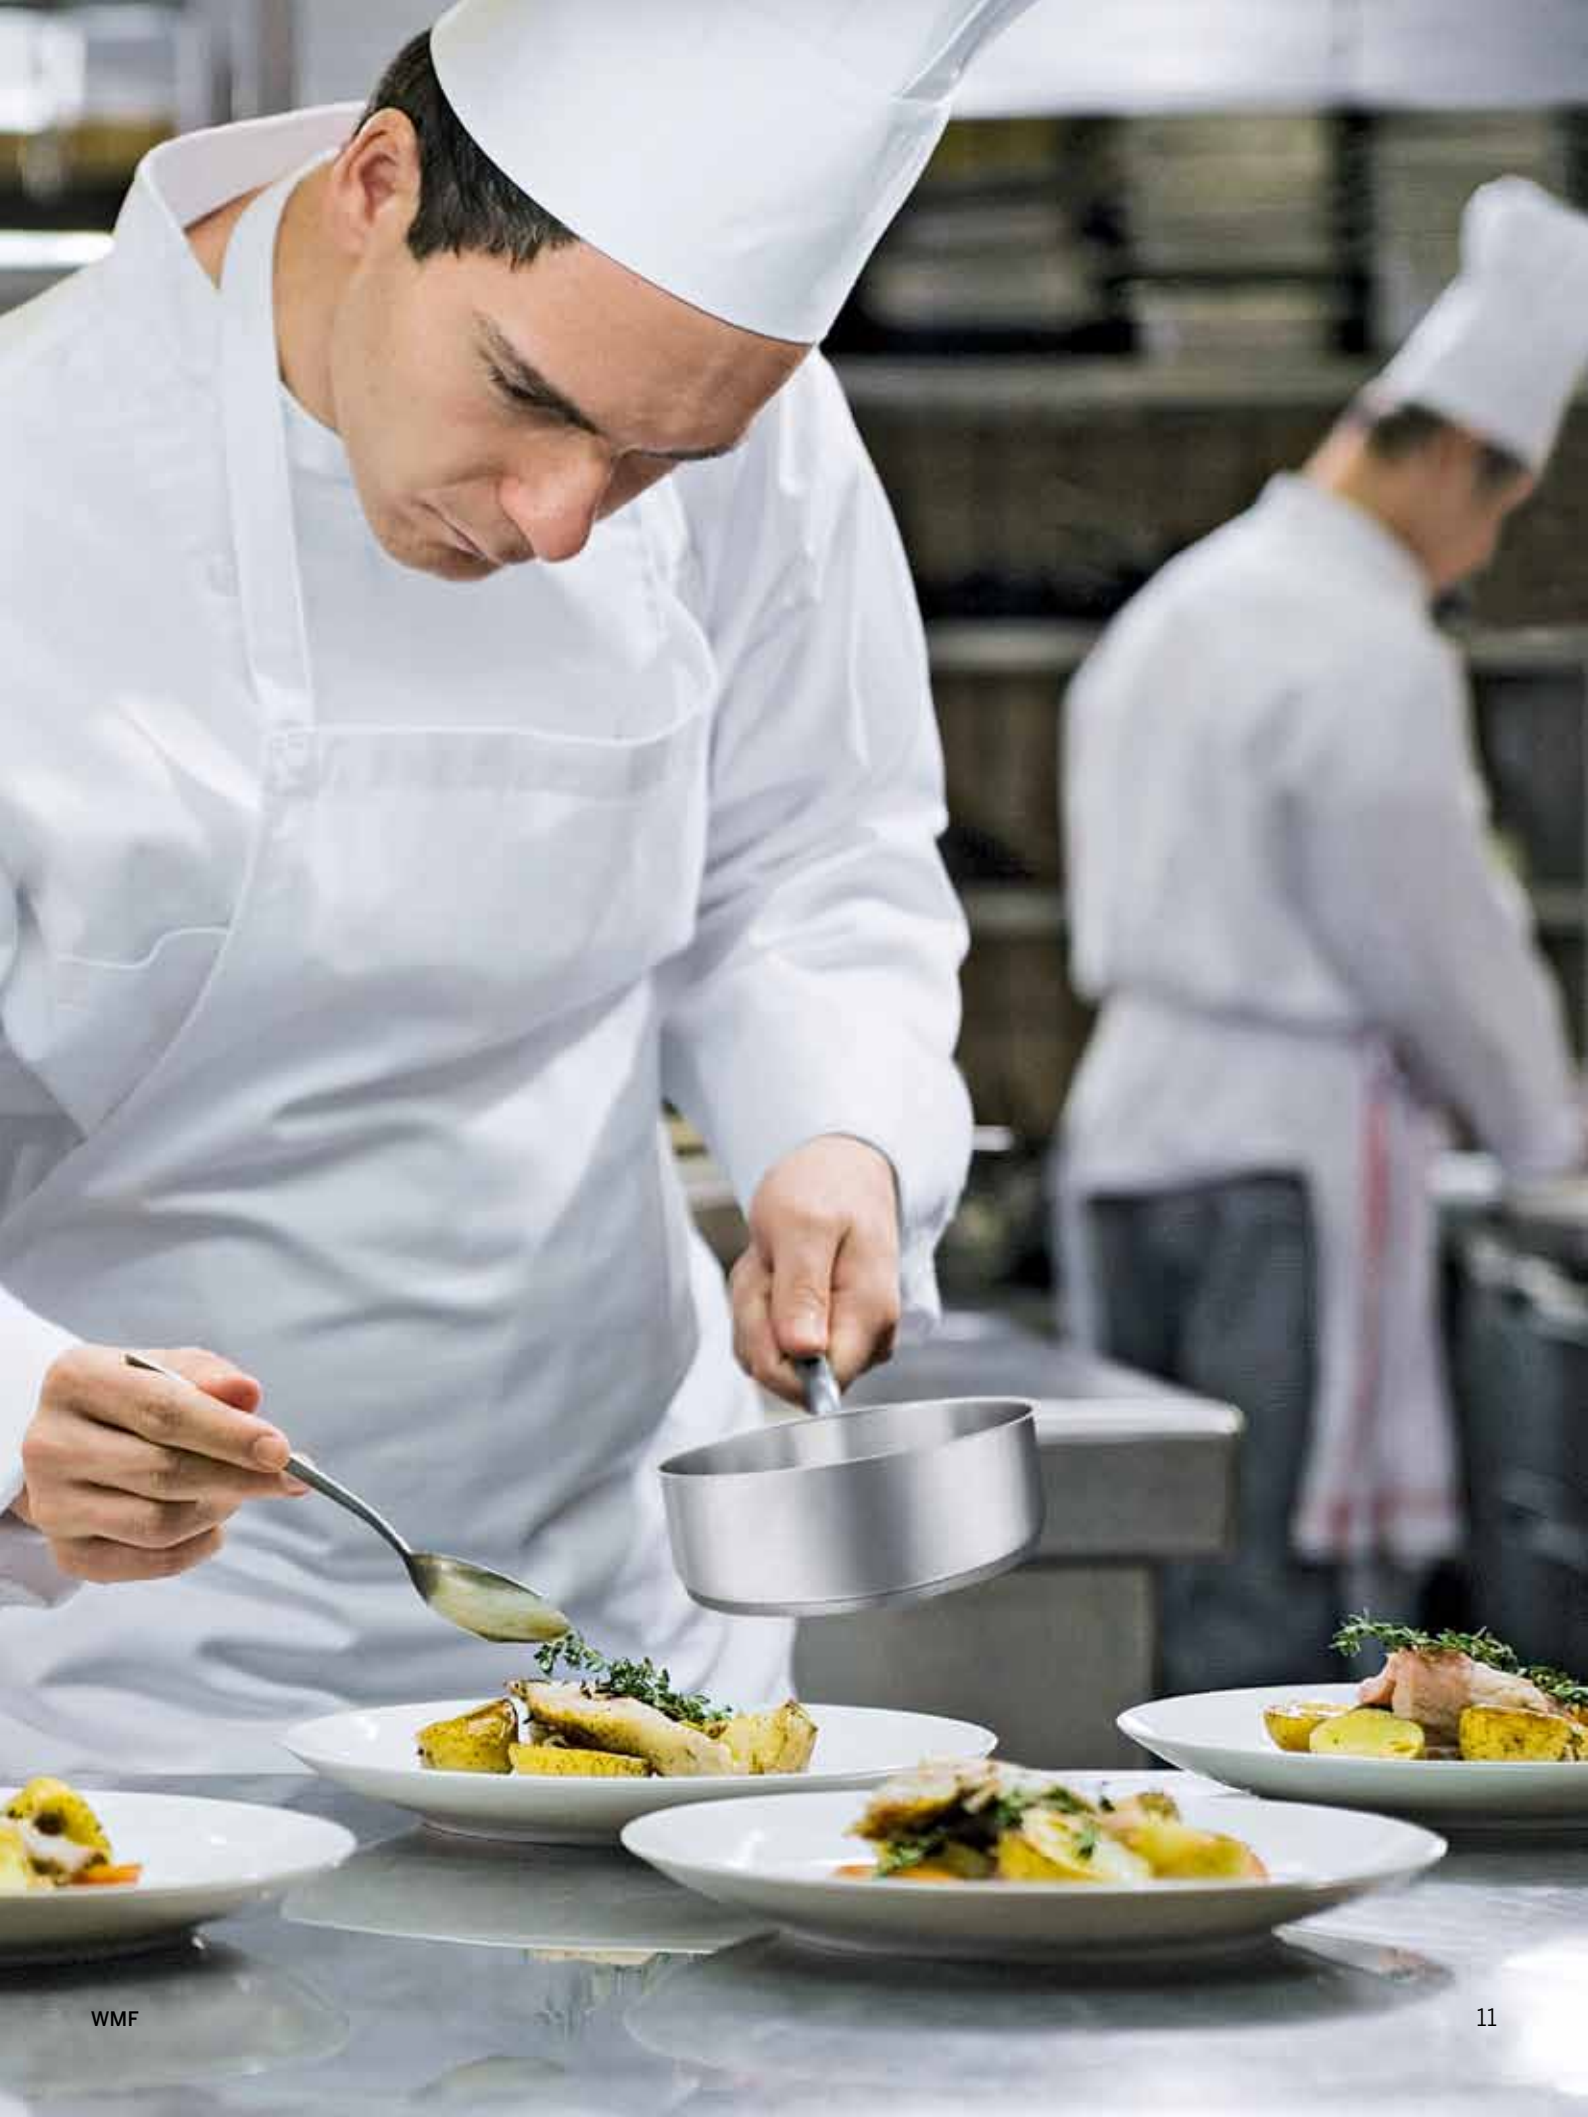

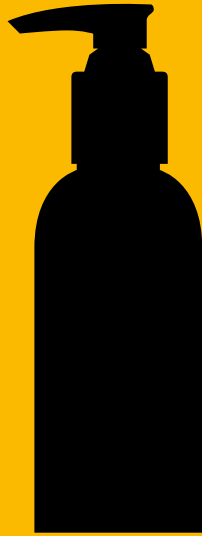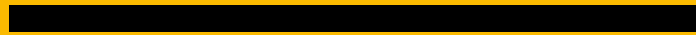

# 800 Mio.

LÖSUNGEN FÜR PRODUKTSICHERHEIT VON SAP HELFEN 800 MILLIONEN  
VERBRAUCHERN, SICHER UND GESUND ZU LEBEN.



## 13 An unsere Aktionäre

- 14 Brief von den Vorstandssprechern
- 16 Vorstand
- 18 Investor Relations
- 23 Corporate-Governance-Bericht
- 28 Bericht des Aufsichtsrats
- 40 Vergütungsbericht
- 60 Erklärung des Vorstands
- 61 Bestätigungsvermerk des Abschlussprüfers

---

# Brief von den Vorstandssprechern

## Mehr erreichen

---

Sehr geehrte Aktionäre, verehrte Kunden und Geschäftspartner, liebe Kollegen,

unser Ziel für 2010 war die erfolgreiche Rückkehr zu profitabilem Wachstum. Daher haben wir uns ganz bewusst dafür entschieden, uns auf unsere Kunden und auf Innovation zu konzentrieren. Denn wir als SAP wollen Unternehmen überall auf der Welt helfen, ihre Geschäftsprozesse weiter zu verbessern. Diese Strategie erlaubt uns zum einen, uns als Marktführer im Stammgeschäft zu behaupten. Zum anderen können wir unseren Zielmarkt verdoppeln, denn durch die Investition in Zukunftstechnologie verschaffen wir unseren Kunden einen entscheidenden Wettbewerbsvorteil.

Unser Konzept ist aufgegangen, wie sich rückblickend zeigt. Die konsequente und schnelle Umsetzung unserer Strategie führte zu soliden Resultaten. So beendeten wir das Jahr mit dem höchsten Softwareumsatz eines vierten Quartals in unserer Firmengeschichte. Die Software- und softwarebezogenen Serviceerlöse (Non-IFRS) stiegen im Gesamtjahr 2010 um 20 % (währungsbereinigt um 13 %). Dieses Ergebnis, zu dem alle Regionen weltweit beitrugen, übertraf unsere eigenen Erwartungen. In den wachstumsintensiven Märkten, vor allem in den BRIC-Ländern, erzielten wir bei den Softwareerlösen sogar ein Plus von 70 % gegenüber dem Vorjahr. Wir gewannen 15.000 Neukunden hinzu, unter ihnen 5.800 Kleinunternehmen und mittelständische Betriebe. Ebenso wichtig: Die operative Marge (Non-IFRS, währungsbereinigt) lag in der erwarteten Spanne.

Ein zentraler Aspekt unserer Strategie sind bahnbrechende neue Technologien. Hierzu gehören die hauptspeicherbasierte Datenverarbeitung (In-Memory Computing), der Zugriff auf Unternehmensdaten vom Mobilgerät aus (Mobile Computing) und die Nutzung von Softwarediensten über das Internet (Cloud Computing). In allen drei Kategorien können wir wichtige Innovationen vorweisen. So ist SAP Business ByDesign erfolgreich im Markt etabliert. Mit dieser Lösung können Kunden bewährte Geschäftsprozesse über das Internet nutzen, ohne selbst ein IT-System zu installieren. Die neue SAP High-Performance Analytic Appliance (SAP HANA) ermöglicht die Auswertung von Geschäftsdaten in Echtzeit, ebenfalls ohne Eingriff in die vorhandene Systemlandschaft. Diese neue In-Memory-Software ist ein gutes Beispiel dafür, wie schnell wir Neuentwicklungen auf den Markt bringen.

Für das laufende Jahr ist unsere Innovationspipeline gut gefüllt. Durch die enge Zusammenarbeit mit Partnern auf der ganzen Welt bieten wir Kunden eine breite Auswahl an modernen, leistungsfähigen Produkten. Denn die technische Entwicklung schreitet so schnell voran, dass kein Hersteller alle Kundenbedürfnisse im Alleingang erfüllen kann. Wir sorgen dafür, dass trotz unterschiedlicher Systemumgebungen sämtliche Daten und Prozesse aufeinander abgestimmt sind und keine Sicherheitslücken entstehen.

Durch die Akquisition von Sybase hat sich die SAP nun auch im Markt für Unternehmensmobilität an die Spitze gesetzt. Die Weichen sind gestellt, um das drahtlose Unternehmen Realität werden zu lassen – mit dem Mobilgerät als Desktop-Computer der Zukunft. Ebenso intensiv verfolgen wir andere zukunftsweisende Technologien, wie Virtualisierung, Cloud Computing und In-Memory Computing. Immer mit dem Ziel, Lösungen zu entwickeln, die einfacher zu implementieren und zu bedienen sind und sich nahtlos in die Systeme der SAP und anderer Anbieter einfügen. Gleichzeitig sollen unsere Kunden von Echtzeitinformationen profitieren, um jederzeit auf aktuelle Ereignisse reagieren zu können.

Unsere Softwareentwicklung haben wir nach den Lean-Prinzipien aufgestellt. Die Entwicklungsteams arbeiten jetzt näher am Kunden und Lösungen kommen schneller auf den Markt. Auch unsere Vertriebsteams positionieren erfolgreich unsere neuen IT-Produkte mit kürzeren Implementierungszeiten und geringeren Betriebskosten. Konsequente Wertschöpfung ist dabei oberstes Gebot: Unsere Kunden sollen für jeden Euro, den sie für SAP ausgeben, zehn zurückbekommen. Kein anderes Unternehmen schafft den Brückenschlag von der Strategie zum konkreten Kundennutzen so gut wie die SAP und ihr offenes Partnernetz.



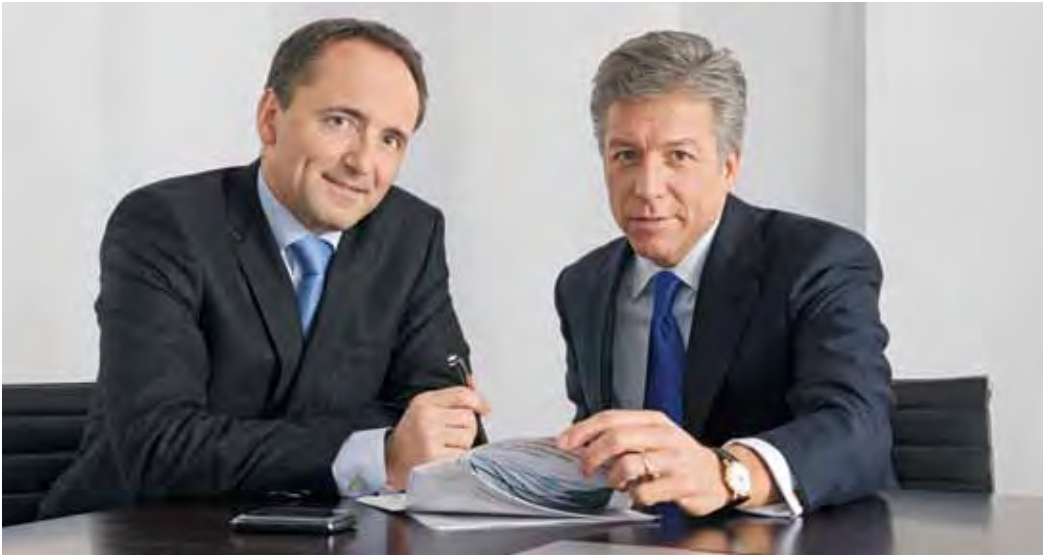

Von links: **Jim Hagemann Snabe**, Vorstandssprecher, **Bill McDermott**, Vorstandssprecher

Auch intern haben wir wichtige Fortschritte gemacht. Angelika Dammann wurde als Leiterin des Personalressorts in den SAP-Vorstand berufen. Damit stellen wir unsere Mitarbeiter noch deutlicher in den Mittelpunkt – denn sie sind unser wichtigstes Gut. So gilt unser Motto „Run better“ auch für uns selbst: Speziell durch die Förderung von Führungskompetenzen und die Mitarbeiterentwicklung wollen wir zusammen mehr erreichen. Es soll eine Kultur entstehen, die unsere Mitarbeiter motiviert und für unser gemeinsames Ziel begeistert: jeden Kunden auf dem Weg zum Best-run Business zu unterstützen.

Es gab aber auch Rückschläge im vergangenen Jahr. Unsere ehemalige Tochtergesellschaft TomorrowNow hat Fehler gemacht, für die wir selbstverständlich geradestehen. Der gerichtlich festgelegte Schadenersatz ist aus unserer Sicht jedoch unverhältnismäßig hoch. Daher prüfen wir alle Optionen, um die geforderte Summe zu reduzieren. Trotz allem haben wir auch eine wertvolle Lektion über Transparenz und verantwortungsvolle Unternehmensführung gelernt. Glücklicherweise wissen unsere Kunden, dass TomorrowNow ein Einzelfall war und der Betrieb bereits vor mehreren Jahren eingestellt wurde.

Unser starkes Ergebnis im Jahr 2010 spricht für sich. Wir sind überzeugt, dass wir unsere ehrgeizigen Pläne für die kommenden Jahre umsetzen und unsere Marktführerschaft weiter ausbauen können. Wir arbeiten konstant daran, mehr zu erreichen und den Wert unseres Unternehmens zu steigern – für unsere Kunden, Mitarbeiter und Aktionäre.

Seitdem wir im Februar 2010 gemeinsam das Ruder in die Hand genommen haben, sind wir ein gutes Stück vorangekommen. Vor allem ist es uns gelungen, das Vertrauen in unser Unternehmen, unsere Strategie und unser Führungsteam wiederherzustellen. Wir geben weiter unser Bestes, um die SAP als Innovationsführer zu positionieren und im Markt für Unternehmenssoftware die unangefochtene Spitze zu bleiben.

Wir bauen auf die starke Partnerschaft mit Ihnen allen und freuen uns darauf, SAP in die Zukunft zu führen – in eine neue Ära des profitablen Wachstums.

Herzlichst

**Jim Hagemann Snabe**  
Vorstandssprecher, SAP AG

**Bill McDermott**  
Vorstandssprecher, SAP AG

# Vorstand

## Dem Erfolg unserer Kunden verpflichtet

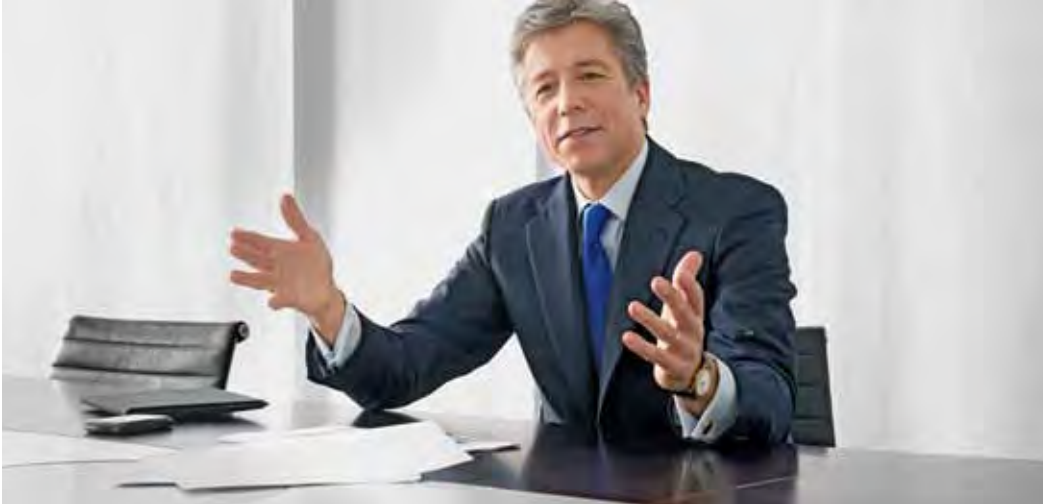

---

**Bill McDermott**

Vorstandssprecher

Bei SAP seit 2002

Vorstandsmitglied seit 2008

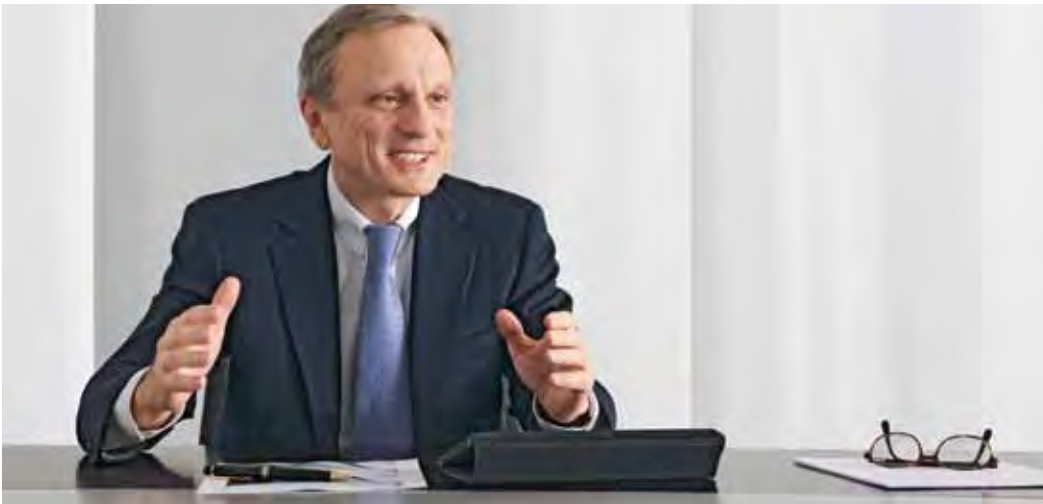

---

**Werner Brandt**

Finanzvorstand

Bei SAP seit 2001

Vorstandsmitglied seit 2001

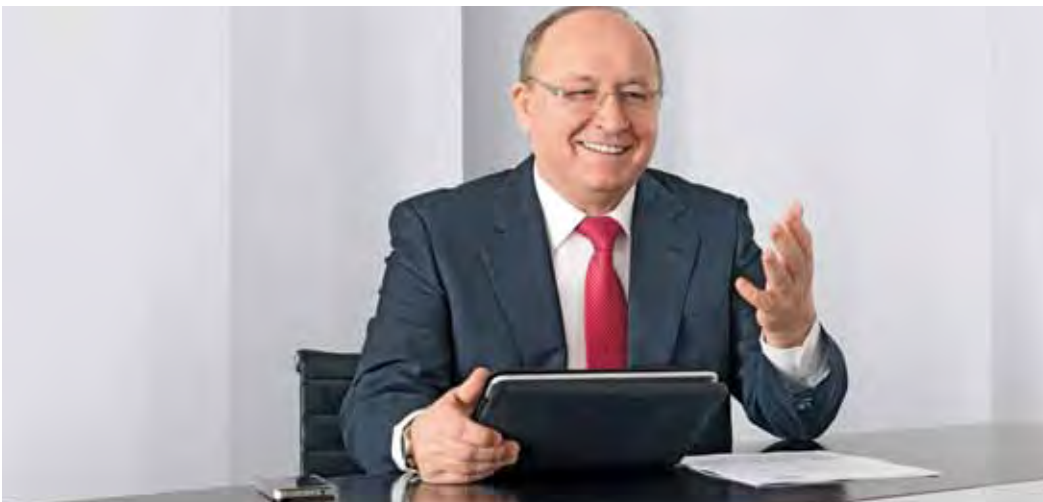

---

**Gerhard Oswald**

Chief Operating Officer

Bei SAP seit 1981

Vorstandsmitglied seit 1996

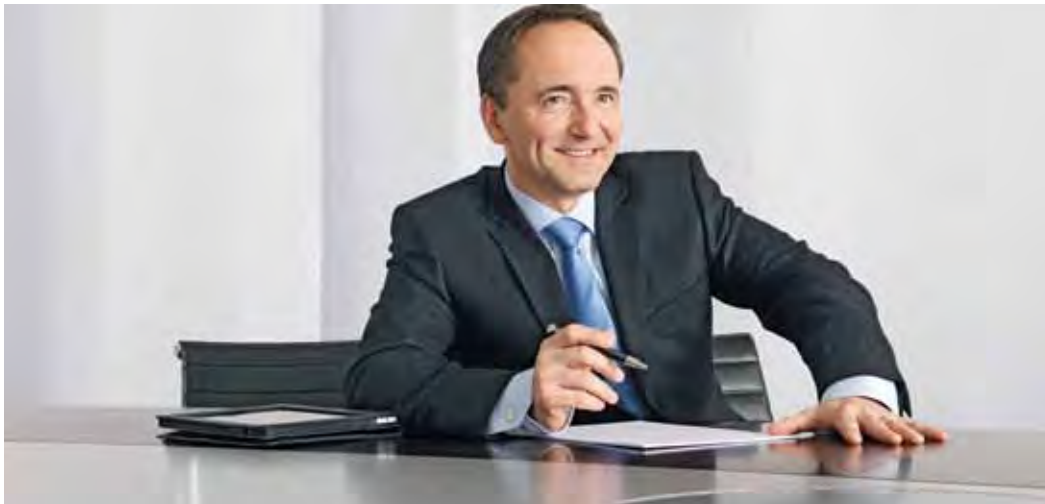

---

**Jim Hagemann Snabe**

Vorstandssprecher

Bei SAP seit 1990

Vorstandsmitglied seit 2008

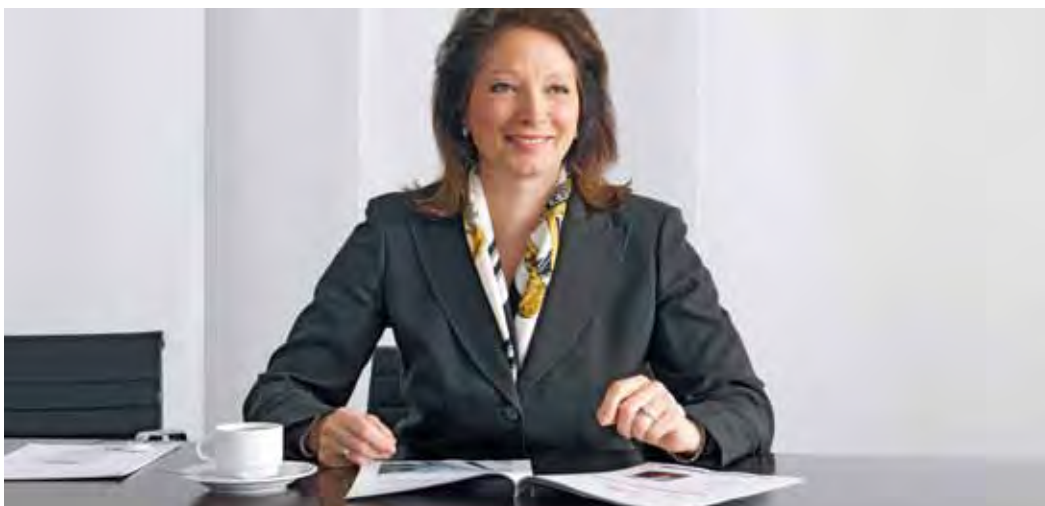

---

**Angelika Dammann**

Personalvorstand und

Arbeitsdirektorin

Bei SAP seit 2010

Vorstandsmitglied seit 2010

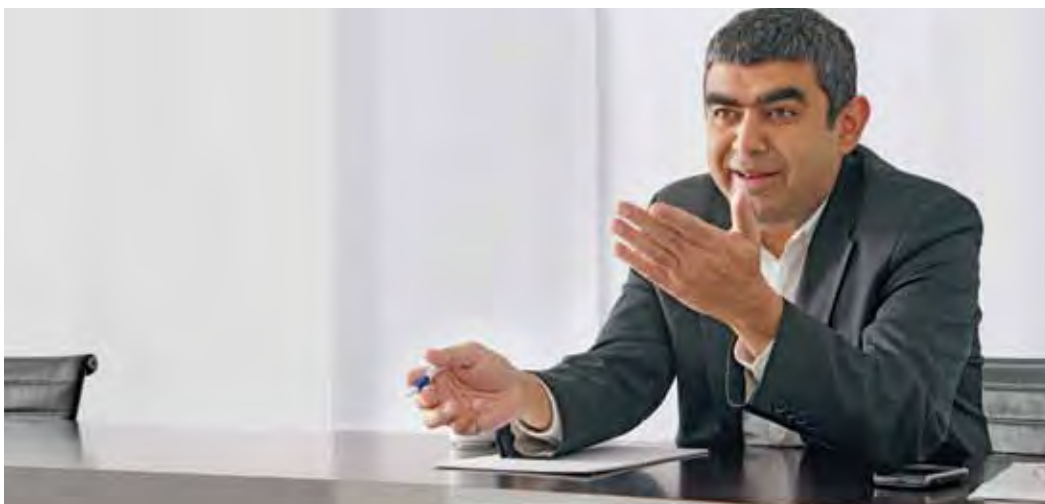

---

**Vishal Sikka**

Bei SAP seit 2002

Vorstandsmitglied seit 2010



---

# Investor Relations

## Transparente und offene Kommunikation

---

Im Mittelpunkt der Gespräche mit Investoren standen die Wachstumsstrategie der SAP, unser Lösungsportfolio, die Veränderungen im Vorstand und die Akquisition von Sybase. Der Kurs der SAP-Aktie entwickelte sich wie die international relevanten Börsenindizes positiv.

### **AKTIENMÄRKTE NEHMEN FAHRT AUF**

Den Start in das Börsenjahr 2010 kennzeichnete ein leichter Abwärtstrend an den Aktienmärkten. Nachdem die Jahresend rally 2009 den Deutschen Aktienindex (DAX 30) über die Marke von 6.000 Punkten getrieben hatte, erreichte dieser am 5. Februar sein Jahrestief bei 5.434 Punkten. Die Schuldenkrise in Europa und in den USA war zum Jahresbeginn das marktbeherrschende Thema an den internationalen Börsen.

Mitte März lag der deutsche Leitindex erneut über 6.000 Punkten und erreichte am 28. April mit 6.332 Punkten den höchsten Stand seit 19 Monaten und erstmals wieder das Niveau vor dem Zusammenbruch der US-Investmentbank Lehman Brothers im September 2008.

Das Geschehen an den Finanzmärkten ab Ende April war von der Schuldenkrise einzelner Länder der Eurozone und der geldpolitischen Lockerung in den USA geprägt. Zwischen Frühjahr und Herbst 2010 schwankten die Kurse seitwärts. Eine deutlich über den Erwartungen liegende Wirtschaftserholung, die von den aufstrebenden Volkswirtschaften getragen wurde, allen voran den BRIC-Staaten, wechselte sich ab mit der Furcht vor einer erneuten US-Rezession sowie Schreckensmeldungen aus Griechenland, Portugal, Irland und Spanien.

Doch positive Konjunkturdaten und -erwartungen sowie die günstigen Bewertungen der Aktienmärkte, neue Zinssenkungsmaßnahmen der US-Zentralbank und die unerwartet starke Konjunktur in Deutschland trieben den DAX 30 nach oben. Im Gesamtjahr 2010 belief sich sein Plus auf etwas mehr als 16 %, was er vor allem dem Jahresendspurt verdankte. Vergleichsindizes wie der amerikanische Dow-Jones-Index gewannen nur rund 11 % im Jahresverlauf hinzu.

Auf dem gleichen Niveau wie der DAX 30 bewegte sich der Technology Peer Group Index (TechPGL), in dem zehn bedeutende Unternehmen aus dem Technologiebereich zusammengefasst sind. Er gewann im gesamten Jahresverlauf rund

16 %. Der S&P 500 gewann 12,8 %, annähernd doppelt so gut entwickelte sich der S&P North Software-Software Index, der um knapp 25 % stieg.

### **SAP-AKTIE SETZT AUFWÄRTSTREND FORT**

Im Börsenjahr 2010 hat sich der Aufwärtstrend der SAP-Aktie fortgesetzt, die bereits 2009 eine erfreuliche Kursentwicklung verzeichnen konnte: 2010 verbesserte sich der Aktienkurs um 15,5 %, nachdem er 2009 bereits um 30,4 % zugelegt hatte. Damit stieg die SAP-Aktie im letzten Jahr ähnlich deutlich wie die wichtigen Vergleichsindizes DAX 30 und Tech PGL, die um 16,1 % beziehungsweise 15,9 % zulegten. Losgelöst von dieser Entwicklung steht der EURO STOXX 50. Dieser gab im gleichen Zeitraum um 5,8 % nach. Ausgehend von einem Xetra-Schlusskurs von 33,00 € Ende 2009 kletterte die SAP-Aktie im Jahresverlauf bis auf 38,10 € am 30. Dezember 2010.

Im ereignisreichen ersten Quartal 2010 entwickelte sich die SAP-Aktie besser als der Markt. Positive Impulse setzten unter anderem der CeBIT-Auftritt der SAP und die Ankündigung einer gegenüber dem Vorjahr unveränderten Dividende. Bei den Anlegern sorgte der Führungswechsel an der SAP-Spitze – mit dem Rücktritt des Vorstandssprechers Léo Apotheker und der Ernennung der Vorstandsmitglieder Bill McDermott und Jim Hagemann Snaube zu gleichberechtigten Vorstandssprechern – kurzzeitig für Verunsicherung und drückte den Aktienkurs in einem schwachen Marktumfeld am 11. Februar auf den Jahrestiefstand von 31,12 €. Kurz zuvor, am 5. Februar, war auch der DAX auf sein Jahrestief von 5.434,3 Punkten gesunken. Das SAP-Papier erholte sich aber zum Quartalsende wieder und stand schließlich am 31. März bei 35,86 €.

Im zweiten Quartal wurde die SAP-Aktie mit der Ankündigung der geplanten Übernahme des IT-Unternehmens Sybase am 12. Mai erneut auf die Probe gestellt. Dies wurde jedoch von der Börse positiv aufgenommen. Trotz des Sybase-Unternehmenswertes von rund 5,8 Mrd. US\$ blieb der Kurs der SAP-Aktie nahezu stabil, da die SAP durch den Zukauf ihre Position im wichtigen Zukunftsmarkt für mobile Geschäftsanwendungen gestärkt hat. Obwohl insbesondere im Mai Sorgen um die

## SAP-Aktie im Vergleich zum DAX 30, zum Dow Jones EURO STOXX 50 und zum S&P North Software-Software Index

1. Januar 2010 bis 28. Februar 2011

Prozent

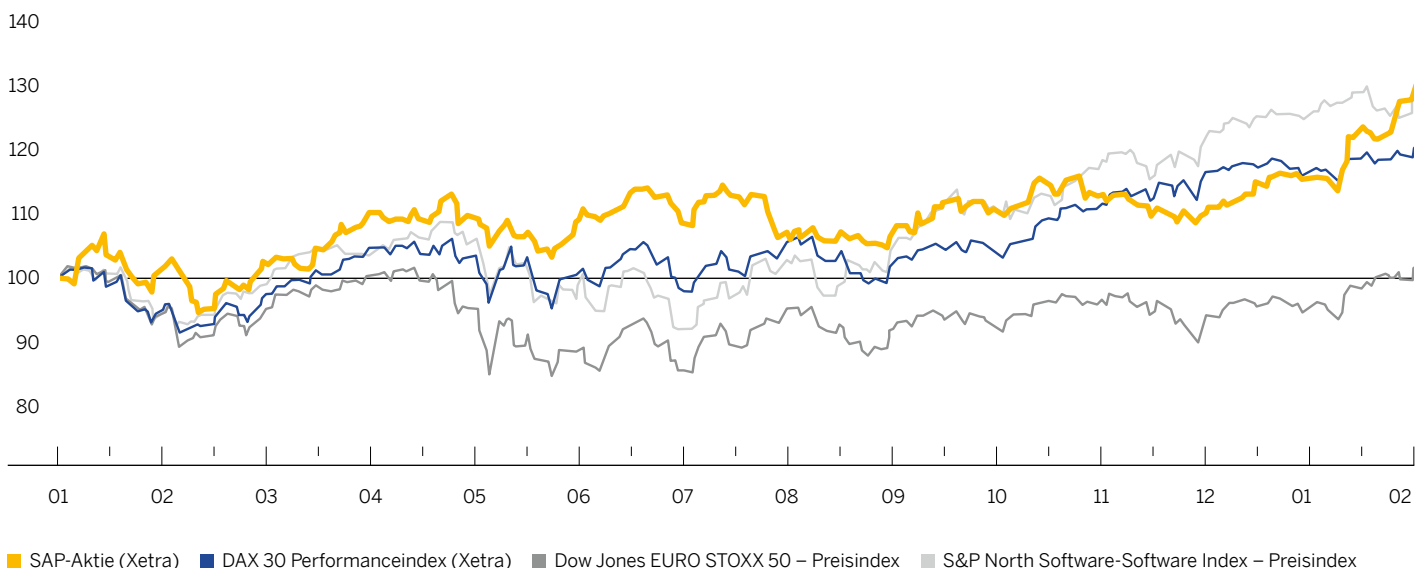

Staatsschulden in der Eurozone und den Wechselkurs des Euro das Sentiment an den Börsen bestimmten, erreichte die SAP-Aktie zum Ende des ersten Halbjahres den Stand von 36,68 €.

In einem optimistischen Börsenumfeld stieg die SAP-Aktie bis zum 14. Juli auf 37,86 €. Aufgrund von Gewinnmitnahmen nach Bekanntgabe der vorläufigen SAP-Finanzergebnisse für das zweite Quartal gab der Kurs bis Ende August auf 34,46 € nach. Positive Nachrichten wie die Vorstellung der neuen Version von SAP Business ByDesign wurden überlagert durch den Rechtsstreit mit dem Wettbewerber Oracle um die Geschäftstätigkeit der früheren SAP-US-Tochtergesellschaft TomorrowNow. Die volatile Entwicklung an den Aktienmärkten verbunden mit der Angst vor einer neuerlichen Abschwächung der Weltwirtschaft hielt bis in den Herbst hinein an und der SAP-Aktienkurs lag Ende September bei 36,29 €.

Mit Beginn des vierten Quartals stieg die SAP-Aktie auf ein neues Jahreshoch bei 38,30 €. Im Zuge der Veröffentlichung der vorläufigen Ergebnisse für das dritte Quartal gab der Kurs

zunächst leicht nach, da die Investoren die Erwartungen hinsichtlich der operativen Marge nicht erfüllt sahen. Zusätzlich drückte der US-Juryentscheid den Kurs der SAP-Aktie, demzufolge Oracle ein Schadenersatz von 1,3 Mrd. US\$ zusteht. Im Dezember machte die SAP-Aktie wieder Boden gut und stieg auf das Jahreshoch von 38,40 € am 29. Dezember, während der DAX 30 im Zuge der Jahresend rally seinen Gipfel von 7.078 Punkten am 21. Dezember erklommen hatte.

Durch den Einfluss des Euro-US-Dollar-Wechselkurses stiegen die an der New Yorker Börse gehandelten SAP American Depositary Receipts (ADRs) im Jahresverlauf nur um 8,1 %; einem Jahresschlusskurs 2009 in Höhe von 46,81 US\$ folgten 50,61 US\$ am Jahresende.

## Stammdaten der Aktie/ADRs

### Notierung

|             |                                     |
|-------------|-------------------------------------|
| Deutschland | Berlin-Bremen, Frankfurt, Stuttgart |
| USA (ADRs)  | New York Stock Exchange             |

### Börsenkürzel und Tickersymbole

|             |                     |
|-------------|---------------------|
| WKN/ISIN    | 716460/DE0007164600 |
| NYSE (ADRs) | 803054204 (CUSIP)   |
| Reuters     | SAPG.F or .DE       |
| Bloomberg   | SAP GR              |
| Quotron     | SAGR.EU.            |

### Gewicht in Indizes zum 31.12.2010

|                         |        |
|-------------------------|--------|
| DAX 30                  | 5,81 % |
| Prime All Share         | 4,66 % |
| CDAX                    | 4,68 % |
| HDAX                    | 4,92 % |
| Dow Jones STOXX 50      | 1,38 % |
| Dow Jones EURO STOXX 50 | 2,25 % |

## DIVIDENDE UM 20 % ERHÖHT

Wie in den Vorjahren wollen wir unsere Aktionäre angemessen am Ergebnis des Geschäftsjahres 2010 beteiligen. Dabei soll die bisherige Dividendenpolitik, die eine Ausschüttung von rund 30 % des Konzernergebnisses vorsieht, fortgeführt werden. Wir sind jedoch der Ansicht, dass die aus dem TomorrowNow-Rechtsstreit resultierenden Aufwendungen bei der Bemessung der Dividende nicht berücksichtigt werden sollten. Daher schlagen Vorstand und Aufsichtsrat der Hauptversammlung vor, die Dividende je Aktie trotz des lediglich um 4 % gestiegenen Gewinns nach Steuern (IFRS) um 20 % auf 0,60 € (2009: 0,50 €) zu erhöhen. Wird dieser Dividendenvorschlag angenommen, so beträgt die rechnerische Summe der Ausschüttung an die Aktionäre 713 Mio. €. Damit würde die Ausschüttungsquote, hier definiert als Verhältnis zwischen Ausschüttungssumme und Gewinn, 39 % (2009: 34 %) betragen.

## WIEDER AKTIENRÜCKKÄUFE GETÄTIGT

Neben der Ausschüttung der Dividende haben wir durch Aktienrückkäufe im Jahr 2010 weitere Überschussliquidität in Höhe von 220 Mio. € an unsere Aktionäre zurückgegeben. Weitere Informationen hierzu entnehmen Sie bitte dem Anhang zum Konzernabschluss.

## GRUNDKAPITAL GESTIEGEN

Das Grundkapital der SAP beträgt 1.226.822.697,00 € (2009: 1.226.039.608 €). Dies entspricht 1.226.822.697 Stückaktien mit einem rechnerischen Nennwert von 1 €.

## FREEFLOAT WEITER ERHÖHT

Der Anteil der Aktien, die sich im sogenannten Streubesitz (Freefloat) befinden, hat sich 2010 erneut leicht erhöht. So erreichte der Streubesitz gemäß der neuen Definition der Deutschen Börse – das heißt ohne Aktien im eigenen Bestand – am 28. Februar 2011 eine Quote von 73,1 % (2010: 72,4 %). Rund 23,7 % (2010: 24,6 %) der ausstehenden Aktien befanden sich im Besitz von drei Gründungsaktionären und der von ihnen gegründeten Stiftungen und Beteiligungsgesellschaften. Wie in den Vorjahren hält die nächstfolgende Investorengruppe, institutionelle Anleger in den USA, rund 17,1 % der ausstehenden Aktien. Institutionelle Investoren in Kontinentaleuropa ohne Deutschland hielten rund 11,7 %, gefolgt von den institutionellen Investoren in Großbritannien und Irland mit rund 11,1 %. Institutionelle Anleger in Deutschland hielten Ende Februar 2011 8,1 % der ausstehenden Aktien und Investoren aus der übrigen Welt 3,1 %. 22,0 % der Anteile lagen in Privatbesitz oder konnten nicht identifiziert werden. SAP hielt 3,2 % der Aktien im eigenen Bestand.

## MITARBEITER HABEN AM ERFOLG TEIL

Auch im Jahr 2010 hatten unsere Mitarbeiter und Führungskräfte am Erfolg des Unternehmens teil. Nähere Informationen über die verschiedenen Beteiligungsprogramme befinden sich im Konzernanhang.



## INTENSIVE KOMMUNIKATION MIT INVESTOREN

Im kontinuierlichen Dialog mit den Anteilseignern stellten sich Vorstände und führende Mitarbeiter erneut höchsten Ansprüchen an Transparenz und Offenheit. In mehr als 500 Einzelgesprächen bei SAP, auf Roadshows (Reisen zu den Investoren in der ganzen Welt) und am Rande von Investorenveranstaltungen beantworteten wir institutionellen Investoren und Analysten Fragen zur wirtschaftlichen Entwicklung des Unternehmens. Hinzu kamen die Telefon- und Analystenkonferenzen anlässlich der Veröffentlichung der Quartalsergebnisse.

Wesentliche Bestandteile unserer Kapitalmarktkommunikation waren auch die Investorenpräsentationen bei den SAPPHIRE-Kundenkonferenzen – zeitgleich in Orlando, Florida, und in

Frankfurt – sowie der „SAP Investor Day“ in Walldorf und in Newtown Square, Pennsylvania. Schwerpunkte dieser Veranstaltungen waren die Themen Wachstumsstrategie der SAP einschließlich der On-Demand-Strategie, der Mittelstand, die Veränderungen im Vorstand und die Akquisition von Sybase sowie der TomorrowNow-Rechtsstreit. Darüber hinaus präsentierte SAP im Rahmen der Konferenz „SRI in the Rockies“ und einer SRI-Roadshow nach London die Themen Umwelt, Soziales und Unternehmensführung vor sogenannten Socially Responsible Investors (SRIs), die auf Umwelt- und Sozialstandards Wert legen.

## Investition in SAP-Stammaktien WKN 716460/ISIN DE0007164600

|                                                    |              |              |               |
|----------------------------------------------------|--------------|--------------|---------------|
| Anlagebetrag: 10.000 €                             |              |              |               |
| Anlagebeginn                                       | 31.12.2000   | 31.12.2005   | 31.12.2009    |
| Anlagezeitraum                                     | 10 Jahre     | 5 Jahre      | 1 Jahr        |
| Depotwert in € am 31.12.2010 <sup>1)</sup>         | 13.702       | 10.627       | 11.705        |
| <b>Durchschnittliche Rendite pro Jahr</b>          | <b>3,2 %</b> | <b>1,2 %</b> | <b>17,0 %</b> |
| Vergleichbare Rendite                              |              |              |               |
| des DAX 30 Performance – Total-Return-Index        | 0,7 %        | 5,0 %        | 16,1 %        |
| des REX General Bond – Total-Return-Index          | 5,1 %        | 4,3 %        | 4,0 %         |
| des S&P 500 Composite – Total-Return-Index         | –2,1 %       | –0,3 %       | 23,1 %        |
| des S&P North Software-Software Index – Preisindex | –4,9 %       | 5,4 %        | 33,8 %        |

<sup>1)</sup> Annahme: Reinvestition aller Erträge

Quelle: Datastream

## Investition in SAP-ADRs 803054204 (CUSIP)

|                                               |              |              |              |
|-----------------------------------------------|--------------|--------------|--------------|
| Anlagebetrag: 10.000 US\$                     |              |              |              |
| Anlagebeginn                                  | 31.12.2000   | 31.12.2005   | 31.12.2009   |
| Anlagezeitraum                                | 10 Jahre     | 5 Jahre      | 1 Jahr       |
| Depotwert in US\$ am 31.12.2010 <sup>1)</sup> | 16.152       | 11.810       | 10.919       |
| <b>Durchschnittliche Rendite pro Jahr</b>     | <b>4,9 %</b> | <b>3,4 %</b> | <b>9,2 %</b> |
| Vergleichbare Rendite                         |              |              |              |
| des S&P 500 Composite – Total-Return-Index    | 1,4 %        | 2,3 %        | 15,1 %       |

<sup>1)</sup> Annahme: Reinvestition aller Erträge

Quelle: Datastream

---

## **UMFASSENDE BETREUUNG DER PRIVATANLEGER**

SAP legt großen Wert auf die umfangreiche Betreuung privater Anleger. Aus diesem Grund übertragen wir alle wichtigen Veranstaltungen, bei denen unsere Vorstandsmitglieder das Unternehmen vor Finanzanalysten und institutionellen Investoren präsentieren, zeitgleich im Internet. Außerdem stellen wir die Präsentationsunterlagen nicht nur auf unserer eigenen Investor-Relations-Internetseite, sondern auch beim Onlinedienst Slideshare zur Verfügung. Im Internet finden Anleger zudem ein breites Angebot an Informationen über die SAP und die SAP-Aktie; dazu zählen auch Services wie SMS-Service oder Twitter-Feeds. Seit 2008 veröffentlichen wir auch eine Übersicht über die aktuellen Analystenschätzungen in Zusammenarbeit mit VARA Research.

Wichtige Teile unserer Kommunikation speziell mit Privatanlegern sind das quartalsweise erscheinende Aktionärsmagazin SAP INVESTOR, das es seit Sommer 2010 auch als interaktive HTML-Version im Internet gibt, der monatlich erscheinende E-Mail-Newsletter für Aktionäre, das Aktionärstelefon sowie die zentrale E-Mail-Adresse [investor@sap.com](mailto:investor@sap.com). Hinzu kommen Präsentationen des Investor-Relations-Teams auf Börsentagen und Anlegermessen in Deutschland und in den USA, wie beispielsweise „The World Money Show“ in Orlando, Florida, „BetterInvesting National Convention“ in St. Louis, Missouri, und „InvestEd“ in Baltimore, Maryland. Neben der direkten Ansprache amerikanischer Privatanleger auf Finanzmessen kommunizierten wir intensiv mit Finanzberatern großer und kleiner Wertpapierhäuser.

## **IR-ARBEIT INTERNATIONAL AUSGEZEICHNET**

Das IR Magazine hat uns 2010 für die beste IR-Arbeit eines Unternehmens aus Kontinentaleuropa im amerikanischen Markt nominiert und beim Ranking der Zeitschrift Capital hat SAP von allen Unternehmen im EURO STOXX gemeinsam mit Bayer und RWE den zweiten Platz erreicht. Das Magazin Institutional Investor zeichnet die Investor-Relations-Arbeit der SAP mit dem dritten Platz unter den Technologie- und Softwareunternehmen (Sell-Side) aus. An der Umfrage beteiligten sich rund 1.100 Sell-Side-Analysten und 650 Investoren.



---

# Corporate-Governance-Bericht

## Verantwortungsvolle Unternehmensführung

---

Für die SAP als weltweit agierenden Konzern mit einer internationalen Aktionärsstruktur hat eine effektive und transparente Corporate Governance besondere Bedeutung. Folglich messen Aufsichtsrat und Vorstand der SAP AG bei ihrer täglichen Arbeit guter Corporate Governance seit vielen Jahren einen hohen Stellenwert bei. Dabei umfasst der Begriff Corporate Governance die Gesamtheit aller internationalen und nationalen Werte und Grundsätze für eine gute und verantwortungsvolle Unternehmensführung, die sowohl für die Leitungs- und Überwachungsorgane als auch für die Mitarbeiter der Unternehmen gelten. Corporate Governance ist dabei nicht als starres System von Regeln und Vorschriften zu verstehen, sondern als ein Prozess, bei dem sich Werte und Grundsätze entsprechend den sich wandelnden Anforderungen weiterentwickeln.

### **CORPORATE GOVERNANCE BEI SAP**

Die Corporate Governance der SAP als in Deutschland börsennotierte Aktiengesellschaft richtet sich nach den gesetzlichen Bestimmungen des deutschen Aktienrechts sowie den Bestimmungen des Deutschen Corporate Governance Kodex (DCGK) in seiner jeweils aktuellen Fassung. Darüber hinaus erfüllt die SAP auch die Vorgaben, die für an der New York Stock Exchange (NYSE) notierte deutsche Unternehmen gelten. Dazu gehören die Corporate Governance Standards der NYSE, der Sarbanes-Oxley Act und die Bestimmungen der US-amerikanischen Börsenaufsichtsbehörde SEC. In ihrer Entsprechenserklärung gemäß § 161 Aktiengesetz (AktG) informieren Vorstand und Aufsichtsrat die Aktionäre der SAP jährlich ausführlich über die Einhaltung der Empfehlungen des DCGK. Der Vorstand gibt darüber hinaus im Rahmen der Veröffentlichung des Jahresabschlusses die Erklärung zur Unternehmensführung gemäß § 289a Handelsgesetzbuch (HGB) ab, in der einzelne Bereiche der Corporate Governance der SAP AG näher erläutert werden. Gemäß Ziffer 3.10 Satz 1 DCGK berichten Aufsichtsrat und Vorstand der SAP AG im Folgenden über die Corporate Governance der SAP im Geschäftsjahr 2010.

### **VORSTAND**

Der Vorstand der SAP AG besteht zum Zeitpunkt dieses Berichts aus sechs Mitgliedern. Er leitet das Unternehmen in eigener Verantwortung. Bei der Ausübung seiner Leitungsmacht ist der Vorstand dem Unternehmensinteresse und der Steigerung des nachhaltigen Unternehmenswertes verpflichtet.

Die von ihm entwickelte strategische Ausrichtung der SAP stimmt er mit dem Aufsichtsrat ab und sorgt für die konzernweite Einhaltung der gesetzlichen Bestimmungen und für ein angemessenes Risikomanagement und Risikocontrolling.

### **AUFSICHTSRAT**

Der Aufsichtsrat der SAP AG umfasst 16 Mitglieder und ist paritätisch mit Vertretern der Anteilseigner und der Arbeitnehmer besetzt. Er bestellt, berät und überwacht den Vorstand. In Entscheidungen von grundlegender Bedeutung für das Unternehmen wird der Aufsichtsrat vom Vorstand eingebunden. Entsprechend hat der Aufsichtsrat für Geschäfte von grundlegender Bedeutung Zustimmungsvorbehalte festgelegt. Der Aufsichtsrat hat entsprechend der Empfehlung in Ziffer 5.4.1 DCGK Ziele für seine Zusammensetzung benannt, die nachfolgend erläutert werden.

### **NEUE EMPFEHLUNGEN DES DCGK**

Der DCGK beschäftigt sich in seiner Fassung vom 26. Mai 2010 in mehreren der insgesamt 90 Empfehlungen mit dem Thema der Diversität und fordert von den Unternehmen eine höhere Internationalisierung und insbesondere die Erhöhung des Anteils von Frauen in Führungspositionen sowie im Vorstand und Aufsichtsrat. Mit dieser Zielsetzung wurden neue Empfehlungen in den DCGK aufgenommen und bestehende Empfehlungen präzisiert.

So wird der Vorstand durch die neue Empfehlung in Ziffer 4.1.5 DCGK angehalten, bei der Besetzung von Führungspositionen im Unternehmen auf Vielfalt (Diversity) zu achten und dabei insbesondere eine angemessene Berücksichtigung von Frauen anzustreben. Der Vorstand der SAP AG entspricht dieser neuen Kodexbestimmung; er achtet bei jeder Neubesetzung einer vakanten Führungsposition auf die Diversität und speziell auf die Erhöhung des Frauenanteils. Darüber hinaus hat der Vorstand einen Plan zur Förderung der Vielfalt bei der Besetzung von Führungspositionen erstellt.

Zudem wird dem Aufsichtsrat erstmals durch Ziffer 5.1.2 DCGK empfohlen, auch bei der Besetzung des Vorstands eine angemessene Berücksichtigung von Frauen anzustreben. Der Aufsichtsrat beachtet diese neue Kodexregelung. Mit Angelika Dammann ist bereits eine Frau im Vorstand vertreten.

---

Des Weiteren soll der Aufsichtsrat gemäß der präzisierenden Neufassung von Ziffer 5.4.1 Abs. 2 DCGK konkrete Ziele für seine Zusammensetzung benennen, die unter Beachtung der jeweiligen unternehmensspezifischen Situation die internationale Tätigkeit des Unternehmens, potenzielle Interessenkonflikte, eine festzulegende Altersgrenze und Vielfalt (Diversity) berücksichtigen. Auch hier soll in besonderem Maße auf die Einbindung von Frauen geachtet werden. Die Vorschläge des Aufsichtsrats an die Wahlgremien sollen diese Ziele berücksichtigen. Gemäß der neuen Kodexempfehlung in Ziffer 5.4.1 DCGK informiert der Aufsichtsrat nachstehend erstmals über seine Besetzungsziele und ihren Erfüllungsgrad:

- Dem Gesamtgremium des Aufsichtsrats gehören jederzeit Mitglieder an, die insgesamt über die erforderlichen Kenntnisse, Fähigkeiten und fachlichen Erfahrungen verfügen, die zur ordnungsgemäßen Wahrnehmung seiner Aufgaben in unserem weltweit agierenden IT-Unternehmen erforderlich sind. Dieses Besetzungsziel ist aktuell erfüllt.
- Dem Aufsichtsrat gehört jederzeit mindestens ein unabhängiges Mitglied an, das über Sachverstand hinsichtlich Rechnungslegung oder Abschlussprüfung verfügt. Dieses ebenfalls gesetzlich geforderte Ziel ist erfüllt.
- Der Aufsichtsrat soll auf der Seite der Anteilseigner immer mit mindestens zwei internationalen Persönlichkeiten besetzt sein, vorausgesetzt, dass der Hauptversammlung geeignete Kandidatinnen oder Kandidaten vorgeschlagen werden können. Dieses Ziel ist ebenfalls bereits erfüllt.
- Spätestens bei der turnusgemäßen Neuwahl des Aufsichtsrats in der Hauptversammlung 2012 soll seitens des Aufsichtsrats mindestens eine Frau für die Wahl in den Aufsichtsrat auf der Seite der Anteilseigner vorgeschlagen und im Fall der Wahl in einen oder mehrere Ausschüsse gewählt werden, vorausgesetzt, dass eine oder mehrere geeignete Kandidatinnen vorgeschlagen werden können. Dieses Ziel, dass dem Aufsichtsrat auf der Seite der Anteilseigner zumindest eine Frau angehört, ist aktuell noch nicht erfüllt.
- Für den gesamten Aufsichtsrat gilt eine Altersgrenze von grundsätzlich 75 Jahren. Keines der derzeitigen Mitglieder überschreitet diese Altersgrenze.
- Bei jeder Neubesetzung im Aufsichtsrat ist sicherzustellen, dass dem Gesamtgremium eine ausreichende Anzahl unabhängiger Mitglieder gemäß Ziffer 5.4.2 DCGK und nicht mehr als zwei ehemalige Vorstandsmitglieder angehören, um potenzielle Interessenkonflikte zu vermeiden. Das Gesamt-

gremium des Aufsichtsrats hat in seiner Sitzung am 17. November 2010 festgestellt, dass ihm eine ausreichende Anzahl unabhängiger Mitglieder angehört. Zudem gehört dem Aufsichtsrat nur ein ehemaliges Vorstandsmitglied an. Die beiden vorgenannten Ziele sind somit aktuell erfüllt.

Von der Entwicklung eines allgemeingültigen Profils für die Besetzung des Aufsichtsrats hat die Neufassung des DCGK abgesehen. Unterstrichen wurde allerdings die Pflicht der Aufsichtsratsmitglieder, eigenverantwortlich Aus- und Fortbildungsmaßnahmen zu ergreifen, was aufgrund einer neuen Empfehlung in Ziffer 5.4.1 Abs. 4 DCGK durch die Gesellschaft unterstützt werden soll. Auch dieser neuen Empfehlung folgen wir, zumal die darin beschriebene Unterstützung seitens SAP bereits in der Vergangenheit gewährt wurde.

Daneben enthält die Neufassung des DCGK noch zwei weitere Ergänzungen bestehender Empfehlungen, die nicht die Themen Diversität und Zusammensetzung des Aufsichtsrats betreffen. Zum einen empfiehlt Ziffer 2.3.3 Satz 2 DCGK, dass die Aktionäre auch bei einer für die Hauptversammlung angeordneten Briefwahl von der Gesellschaft unterstützt werden. Wir werden dieser Empfehlung nachkommen, wenn der Vorstand von der durch die Hauptversammlung 2010 eingeräumten Satzungsermächtigung Gebrauch machen sollte, dass Aktionäre ihre Stimmen, auch ohne an der Versammlung teilzunehmen, schriftlich oder im Wege elektronischer Kommunikation abgeben dürfen (Briefwahl). Zum anderen wurde die bisherige Empfehlung in Ziffer 5.4.5 Satz 2 DCGK erweitert, wonach Vorstandsmitglieder einer börsennotierten Gesellschaft nicht mehr als drei Aufsichtsratsmandate in konzernexternen börsennotierten Gesellschaften wahrnehmen sollen. Die Empfehlung schließt künftig auch Mandate in Aufsichtsratsgremien von nicht börsennotierten konzernexternen Unternehmen ein, die vergleichbare Anforderungen an deren Mitglieder stellen, wie sie bei börsennotierten Gesellschaften gelten. Unsere Vorstandsmitglieder beachten diese präzisierte Empfehlung.

#### **ENTSPRECHENSERKLÄRUNG GEMÄSS § 161 AKTG**

Vorstand und Aufsichtsrat der SAP erklären jährlich, ob den Empfehlungen des DCGK entsprochen wurde und wird, oder begründen, welche Empfehlungen nicht umgesetzt werden.



---

Die am 29. Oktober 2010 abgegebene Entsprechenserklärung ist auf der Internetseite der SAP unter [www.sap.com/germany/about/governance/statutes/entsprechenserklaerung.epx](http://www.sap.com/germany/about/governance/statutes/entsprechenserklaerung.epx) veröffentlicht. Dort sind auch die Entsprechenserklärungen vorhergehender Jahre sowie Links auf die geltende sowie auf ältere Fassungen des DCGK verfügbar. Die aktuelle Entsprechenserklärung ist auch in der Erklärung zur Unternehmensführung enthalten, die ebenfalls auf der Internetseite der SAP unter [www.sap.com/germany/about/governance/ezu](http://www.sap.com/germany/about/governance/ezu) veröffentlicht ist.

Aus dieser Entsprechenserklärung ist ersichtlich, dass wir von den insgesamt 90 Empfehlungen des DCGK vom 26. Mai 2010 zwei nicht befolgen und in der Vergangenheit von den insgesamt 82 Empfehlungen des DCGK vom 18. Juni 2009 fünf nicht befolgt haben. Die jeweiligen Abweichungen sind dort gemäß § 161 Abs. 1 Satz 1 AktG ausführlich begründet. Die beiden Abweichungen vom geltenden DCGK werden gemäß der Empfehlung in Ziffer 3.10 Satz 2 DCGK nachfolgend noch einmal erläutert:

- Wir wenden Ziffer 3.8 DCGK nicht an. Diese empfiehlt, in Haftpflichtversicherungen, die ein Unternehmen für seine Aufsichtsratsmitglieder abschließt (sogenannte Directors and Officers Liability Insurances, D&O), einen Selbstbehalt vorzusehen. Wir sind grundsätzlich nicht der Ansicht, dass Motivation und Verantwortung, mit denen die Mitglieder des SAP-Aufsichtsrats ihre Aufgabe wahrnehmen, durch einen solchen Selbstbehalt verbessert werden könnten. Deshalb planen wir in den D&O-Versicherungsverträgen keinen Selbstbehalt für Aufsichtsratsmitglieder.
- Ferner wenden wir Ziffer 4.2.3 Abs. 4 DCGK nicht an. Diese empfiehlt, bereits beim Abschluss von Vorstandsverträgen darauf zu achten, dass Zahlungen an Vorstandsmitglieder bei vorzeitiger Beendigung der Vorstandstätigkeit ohne wichtigen Grund einschließlich Nebenleistungen zwei Jahresvergütungen nicht überschreiten (sogenannter Abfindungs-Cap) und nicht mehr als die Restlaufzeit des Anstellungsvertrags vergüten. Wir beachten zwar sehr wohl die Kodexempfehlung für einen Abfindungs-Cap gemäß Ziffer 4.2.3 Abs. 5 DCGK in den Fällen eines Kontrollwechsels (Change of Control), sind jedoch der Ansicht, dass es anders als dort nicht praktikabel wäre, bereits bei Abschluss eines Vorstandsvertrags eine Regelung über die Abfindungszahlung bei vorzeitiger einvernehmlicher Beendigung der Vorstandstätigkeit aufzunehmen. Eine solche im Voraus

getroffene Vereinbarung widerspräche der Natur des regelmäßig auf die Dauer der Bestellungsperiode abgeschlossenen und im Grundsatz nicht ordentlich kündbaren Vorstandsvertrags. Zudem ließe sich eine im Vorstandsvertrag enthaltene entsprechende Begrenzung der Abfindungshöhe in den entscheidenden Fällen – jedenfalls faktisch – nicht ohne Weiteres einseitig von der Gesellschaft durchsetzen. Darüber hinaus könnte eine solche vorab getroffene Vereinbarung den konkreten Umständen, die später zu einer vorzeitigen Beendigung der Vorstandstätigkeit führen, und der übrigen Situation des Einzelfalls zum Zeitpunkt der Beendigung nicht hinreichend Rechnung tragen. Den Grundgedanken der Empfehlung berücksichtigen wir aber insoweit, als wir an unserer bisherigen Praxis festhalten, im Falle der vorzeitigen einvernehmlichen Aufhebung eines Vorstandsvertrags eine Abfindungsregelung mit dem betroffenen Vorstandsmitglied zu vereinbaren, die dem Gebot der Angemessenheit entspricht.

#### **ANREGUNGEN DES DCGK**

Mit nur einer Ausnahme folgen wir im Übrigen allen 16 Anregungen des aktuellen DCGK vom 26. Mai 2010. Wie im Vorjahr haben wir von der Festlegung einer erfolgsorientierten Vergütung für Aufsichtsräte abgesehen, die sich auf den langfristigen Unternehmenserfolg gemäß Ziffer 5.4.6 Abs. 2 DCGK bezieht. SAP hat Zweifel, ob der langfristige Unternehmenserfolg für die Aufsichtsratsvergütung die richtige Grundlage ist und für die Aufsichtsräte eine bessere Motivationslage im Hinblick auf das Unternehmen herbeiführt. Bei SAP ist daher die variable Vergütung an die Dividende gekoppelt und die Vergütungshöhe damit ohne Weiteres aus der Satzungsregelung über die Aufsichtsratsvergütung ableitbar. Unserer Ansicht nach wird auf diese Art und Weise eine transparente und angemessene Vergütung der Aufsichtsräte gewährleistet, die den gesetzlichen Zuständigkeiten der Aufsichtsräte entspricht.

#### **ERKLÄRUNG ZUR UNTERNEHMENSFÜHRUNG**

Der Vorstand der SAP AG hat im Rahmen der Veröffentlichung des Jahresabschlusses der SAP AG für das Geschäftsjahr 2010 die Erklärung zur Unternehmensführung gemäß § 289a HGB abgegeben. Die Pflicht zur Abgabe einer Erklärung zur Unternehmensführung wurde 2009 durch das Bilanzrechtsmodernisierungsgesetz (BilMoG) für börsennotierte Aktiengesellschaften neu eingeführt. Die Erklärung ist entweder im Lagebericht oder auf der Internetseite der Gesellschaft

---

wiederzugeben und beinhaltet die Entsprechenserklärung nach § 161 AktG, relevante Angaben zu Unternehmensführungspraktiken und eine Beschreibung der Arbeitsweise von Vorstand und Aufsichtsrat sowie der Zusammensetzung und Arbeitsweise der Ausschüsse des Aufsichtsrats. Die von der SAP AG für das Geschäftsjahr 2010 abgegebene Erklärung zur Unternehmensführung findet sich auf der Internetseite der SAP unter [www.sap.com/germany/about/governance/ezu](http://www.sap.com/germany/about/governance/ezu).

### **CODE OF BUSINESS CONDUCT**

Zu den bei SAP angewendeten Unternehmensführungspraktiken zählen vor allem unsere Geschäftsgrundsätze für Mitarbeiter und Vorstände (Code of Business Conduct). Mit diesen Geschäftsgrundsätzen haben wir den Anspruch, den wir an das Verhalten unserer Mitarbeiter und Vorstände stellen, verdeutlicht und gleichzeitig die wesentlichen Prinzipien unseres Geschäftsverhaltens gegenüber Kunden, Partnern und Aktionären bekannt gemacht. SAP versteht die Geschäftsgrundsätze als Maßstab für die Zusammenarbeit und das Miteinander mit Kunden, Partnern, Lieferanten, Aktionären und Wettbewerbern. Mit der Umsetzung dieser Richtlinien im geschäftlichen Alltag bekennen wir uns zugleich zum Engagement gegen jede Form von unlauterem Wettbewerb, Korruption und Irreführung. Ein dem Leiter der Konzernrechtsabteilung zugeordnetes Compliance-Team ist damit betraut, weltweit die Einhaltung unternehmensinterner Richtlinien wie des Code of Business Conduct zu überwachen, diese Richtlinien regelmäßig zu prüfen und, falls erforderlich, zu aktualisieren und Mitarbeiterschulungen abzuhalten.

### **ARBEITSWEISE VON VORSTAND UND AUFSICHTSRAT**

Vorstand und Aufsichtsrat arbeiten zum Wohle des Unternehmens eng zusammen. Der Vorstand informiert den Aufsichtsrat regelmäßig, zeitnah und umfassend über alle relevanten Fragen der Unternehmensplanung, der Geschäftsentwicklung einschließlich eventueller Abweichungen im Geschäftsverlauf, der Risikolage und des Risikomanagements. Anhand der Erklärung zur Unternehmensführung können sich die Aktionäre der SAP umfassend über die Arbeitsweise von Vorstand und Aufsichtsrat sowie die Zusammensetzung und Arbeitsweise der Ausschüsse des Aufsichtsrats informieren. Weiter gehende Informationen zur Zusammenarbeit von Vorstand und Aufsichtsrat sowie zur konkreten Arbeit des Aufsichtsrats und seiner Ausschüsse im Berichtsjahr 2010 können Sie dem Bericht des Aufsichtsrats im vorliegenden Geschäftsbericht entnehmen.

### **UMSETZUNG INTERNATIONALER CORPORATE-GOVERNANCE-REGELN**

Aufgrund der Notierung an der NYSE unterliegt SAP bestimmten amerikanischen Kapitalmarktgesetzen sowie besonderen Regeln der US-amerikanischen Börsenaufsicht SEC und der NYSE. Neben den Anforderungen gemäß Section 404 und den weiteren Vorschriften des Sarbanes-Oxley Act, die eine jährliche Prüfung unseres internen Kontrollsystems für die Finanzberichterstattung fordern, erfüllen wir die im NYSE Listed Company Manual geregelten Bestimmungen, sofern diese für Nicht-US-Unternehmen einschlägig sind. Diese Bestimmungen beziehen sich auf die Einrichtung und Zusammensetzung eines Prüfungsausschusses und damit zusammenhängende Berichtspflichten der SAP gegenüber der NYSE. SAP hat entsprechend den Corporate-Governance-Regeln der SEC und NYSE im Jahresbericht Form 20-F (Annual Report on Form 20-F) unter Abschnitt 16G (Item 16G) offengelegt, inwiefern sich die von uns angewendeten deutschen Corporate-Governance-Vorschriften wesentlich von den Corporate Governance Standards unterscheiden, die für an der NYSE notierte US-Unternehmen gelten. Der Annual Report on Form 20-F, der nur in englischer Sprache verfügbar ist, ist auf der Internetseite der SAP unter [www.sap.com/germany/about/investor/reports/2007-2011](http://www.sap.com/germany/about/investor/reports/2007-2011) veröffentlicht.

### **TRANSPARENZ, KOMMUNIKATION UND SERVICE FÜR AKTIONÄRE**

Aktionäre der SAP können sich auf unserer Internetseite rechtzeitig und umfassend über unser Unternehmen informieren und aktuelle wie auch historische Unternehmensdaten abrufen. Die SAP veröffentlicht dort unter anderem regelmäßig die gesamte Finanzberichterstattung, wesentliche Informationen über die Organe der Gesellschaft, ihre Corporate-Governance-Dokumentation, Fragen-und-Antworten-Kataloge zu aktuellen wirtschaftlichen Maßnahmen der SAP, ad-hoc-pflichtige Informationen, Pressemitteilungen sowie gemäß § 15a WpHG meldepflichtige Wertpapiergeschäfte (Directors' Dealings). Wir bieten unseren Aktionären und der interessierten Öffentlichkeit zudem die Möglichkeit, über das Internet die gesamte Hauptversammlung der SAP live zu verfolgen. Unsere Aktionäre haben mehrere Möglichkeiten ihr Stimmrecht in der Hauptversammlung selbst oder durch einen Bevollmächtigten ihrer Wahl oder aber durch einen weisungs-

---

gebundenen, von der Gesellschaft bestellten Vertreter auszuüben; die Einzelheiten hierzu sind in der Einladung zur Hauptversammlung dargestellt. Die gesamte Dokumentation zur Hauptversammlung ist auf der Internetseite der SAP unter [www.sap.com/agm](http://www.sap.com/agm) und [www.sap.de/hauptversammlung](http://www.sap.de/hauptversammlung) für jeden Aktionär rechtzeitig verfügbar.

### **RECHNUNGSLEGUNG, RISIKOMANAGEMENT UND INTERNES KONTROLLSYSTEM**

Die KPMG AG Wirtschaftsprüfungsgesellschaft ist der von der Hauptversammlung der SAP im Juni 2010 gewählte Abschlussprüfer und Konzernabschlussprüfer. Den Jahresabschluss der SAP AG stellen wir nach den Vorschriften des HGB auf, den verpflichtenden Konzernabschluss nach International Financial Reporting Standards (IFRS). Zusätzlich stellen wir entsprechend den Anforderungen des HGB einen zu einem Bericht zusammengefassten Lagebericht und Konzernlagebericht sowie einen Jahresbericht Form 20-F nach den Anforderungen der US-Börsenaufsichtsbehörde SEC auf. Die Rechnungslegung liegt in der Verantwortung des Vorstands. Der Jahresabschluss und der pflichtgemäß erstellte Konzernabschluss sowie der zu einem Bericht zusammengefasste Lagebericht und Konzernlagebericht werden vom Aufsichtsrat gebilligt.

Neben dieser Rechnungslegung für das Gesamtjahr erstellen wir für das erste bis dritte Quartal jeweils einen Quartalsbericht nach den Vorschriften des Wertpapierhandelsgesetzes, der vor seiner Veröffentlichung mit dem Prüfungsausschuss des Aufsichtsrats diskutiert wird.

SAP unterliegt gemäß den einschlägigen Regelungen des Aktien- und Handelsrechts besonderen Anforderungen an ein unternehmensinternes Risikomanagement. Daher reicht unser weltweites Risikomanagement von der Risikoplanung über die Risikoermittlung, -analyse und -bearbeitung bis hin zur Risikobehhebung. Darüber hinaus dokumentieren wir unternehmensweit einheitlich die SAP-internen Kontrollmechanismen und bewerten regelmäßig ihre Effektivität. Als an der NYSE notiertes Unternehmen lassen wir außerdem jährlich durch unseren Konzernabschlussprüfer KPMG eine Prüfung unseres internen Kontrollsystems für die Finanzberichterstattung nach den Anforderungen der Section 404 des Sarbanes-Oxley Act durchführen. Die Prüfung dieses Kontrollsystems bestätigte die Funktionsfähigkeit des Systems

zum 31. Dezember 2010. Im zusammengefassten Lagebericht und Konzernlagebericht geben wir entsprechend den im Jahr 2010 neu eingeführten Berichtspflichten nach §§ 289 Abs. 5, 315 Abs. 2 Nr. 5 HGB umfassend Auskunft über die wesentlichen Merkmale des internen Kontroll- und Risikomanagementsystems im Hinblick auf den Rechnungslegungsprozess und den Konzernrechnungslegungsprozess der SAP.

### **ANGABEN ZUR VERGÜTUNG VON VORSTAND UND AUFSICHTSRAT**

Die Empfehlungen des DCGK sehen vor, dass verschiedene Angaben zur Vergütung und zum Aktienbesitz der Vorstände und Aufsichtsräte sowie zu Aktienoptionen und ähnlichen Anreizsystemen im Corporate-Governance-Bericht beziehungsweise im Vergütungsbericht als Teil des Corporate-Governance-Berichts aufgeführt werden. Im Vergütungsbericht sind diese Angaben ebenso wie die nach den gesetzlichen Regelungen erforderlichen Angaben zur Vergütung der Vorstände und Aufsichtsräte vollständig enthalten. Der Vergütungsbericht ist integraler Bestandteil des geprüften Lage- und Konzernlageberichts und bildet zugleich einen Teil dieses Corporate-Governance-Berichts. Der Aufsichtsrat hat den Lage- und Konzernlagebericht, einschließlich des Vergütungsberichts, gebilligt und sich den Inhalt des Vergütungsberichts für die Zwecke der nach dem DCGK erforderlichen Berichterstattung zu Fragen der Corporate Governance und der Vergütung in vollem Umfang zu eigen gemacht.



# Bericht des Aufsichtsrats

## Zusammenarbeit und Kontrolle

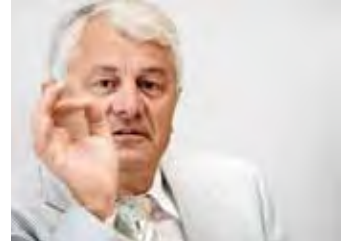

### Sehr geehrte Aktionärinnen und Aktionäre,

das Jahr 2010 markiert für die SAP die erfolgreiche Rückkehr zu zweistelligem, profitabilem Wachstum nach der globalen Finanzkrise. Mit dem Wechsel in der Unternehmensführung durch die Ernennung von Bill McDermott und Jim Hagemann Snaube zu gleichberechtigten Vorstandssprechern am 7. Februar 2010 wurden die Weichen für eine positive Weiterentwicklung der SAP gestellt. Im vierten Quartal 2010 erzielte das Unternehmen den höchsten Quartalsumsatz mit Software in seiner Geschichte – dies wäre ohne die deutlich stärkere Kundenorientierung, den Fokus auf Innovationen und eine bessere Motivation der Mitarbeiter nicht möglich gewesen.

Mit der Bestellung von Vishal Sikka zum Vorstandsmitglied ist die technologische Innovationskraft der SAP weiter gestärkt worden, und mit Angelika Dammann als erster Frau im SAP-Vorstand erhält das Thema Mitarbeiterführung nun eine weiter gesteigerte Aufmerksamkeit auf Vorstandsebene.

Der Vorstand hat die strategische Ausrichtung des Unternehmens in die richtige Richtung vorangetrieben. Die neu formulierte Unternehmensstrategie setzt sich aus vier Bereichen zusammen, mit den englischen Begriffen: „On Premise“, „On Demand“, „On Device“ sowie „Orchestration“. Damit werden die Stärken der SAP fortgeführt und zugleich neue Wachstumspotenziale erschlossen.

Mit Softwarelösungen, die beim Kunden vor Ort installiert werden (On Premise), ist die SAP zum Marktführer für Unternehmenssoftware geworden. Mit Lösungen, die – wie beispielsweise SAP Business ByDesign – über das Internet genutzt werden (On Demand), können nun neue Marktsegmente gewonnen und den Bestandskunden neue Optionen angeboten werden. Immer wichtiger wird auch die Nutzung von Unternehmenssoftware auf weitaus mehr Geräten als dem klassischen PC (On Device). Insbesondere die enorm steigende Verbreitung und Leistungsfähigkeit mobiler Kleincomputer eröffnet die Möglichkeit, SAP-Software in Zukunft für deutlich größere Nutzerzahlen zugänglich zu machen. Die Akquisition von Sybase im Sommer 2010 war daher – neben dem Datenbankgeschäft – von großer Bedeutung für die Entwicklung einer mobilen Plattform für SAP-Anwendungen, die im Frühjahr 2011 vorgestellt werden soll. Und schließlich ist die SAP bestens aufgestellt, um ihren Kunden auch das Zusammenspiel

ihrer Anwendungen in komplexen IT-Landschaften – gleich ob On Premise, On Demand oder On Device – zu ermöglichen (Orchestration).

Der Aufsichtsrat hat volles Vertrauen, dass der Vorstand diese Strategie erfolgreich umsetzen und die notwendigen Veränderungsprozesse im Unternehmen vorantreiben wird, um nachhaltig profitables Wachstum zu schaffen.

Wir haben die Arbeit des Vorstands im Geschäftsjahr 2010 intensiv begleitet und kontrolliert. Ein enger und kooperativer Dialog zwischen Aufsichtsrat und Vorstand ist die Basis für eine effiziente Gestaltung und Durchführung der Tätigkeit des Aufsichtsrats gerade in einem wirtschaftlich herausfordernden Umfeld. Die kontinuierliche Zusammenarbeit zwischen Vorstand und Aufsichtsrat erläutern wir deshalb zu Beginn dieses Berichts. Daneben stehen die wesentlichen Beratungsthemen im Gesamtaufsichtsrat, die Arbeit in den Ausschüssen, die Corporate Governance der SAP und die Jahres- und Konzernabschlussprüfung im Vordergrund.

### **ZUSAMMENARBEIT VON VORSTAND UND AUFSICHTSRAT**

Wir haben im Berichtsjahr 2010 die uns nach Gesetz und Satzung obliegenden Aufgaben wahrgenommen, den Vorstand bei der Leitung des Unternehmens regelmäßig beraten und seine Geschäftsführung überprüft und überwacht. Maßstab für die Überwachung waren dabei namentlich die Rechtmäßigkeit, Ordnungsmäßigkeit, Zweckmäßigkeit und Wirtschaftlichkeit der konzernweiten Geschäftsführung durch den Vorstand. Vorstand und Aufsichtsrat haben sich zudem über die strategische Ausrichtung des Unternehmens abgestimmt und in regelmäßigen Abständen den Stand der Strategieumsetzung erörtert. In alle Entscheidungen, die für das Unternehmen von grundlegender Bedeutung sind, waren wir unmittelbar eingebunden.

Der Vorstand unterrichtete den Aufsichtsrat in schriftlicher und mündlicher Form regelmäßig, zeitnah und umfassend. Dabei wurden vor allem die Planung, die Geschäftsentwicklung und -lage der SAP einschließlich der Risikolage, das Risikomanagement, die Compliance (also die Einhaltung von Gesetzen und Richtlinien) sowie Geschäfte von besonderer Bedeutung für das Unternehmen behandelt. Der Vorstand ging dabei auch auf Abweichungen des Geschäftsverlaufs von den aufgestellten Plänen und Zielen ein und erläuterte die Abweichungen.

---

Gegenstand und Umfang der Berichterstattung des Vorstands wurden den vom Aufsichtsrat gestellten Anforderungen in vollem Umfang gerecht. Neben den Berichten ließ sich der Aufsichtsrat vom Vorstand ergänzende Informationen erteilen. Insbesondere stand der Vorstand in den Aufsichtsratssitzungen zur Erörterung und zur Beantwortung unserer Fragen zur Verfügung. Die vom Vorstand erteilten Informationen haben wir auf ihre Plausibilität hin überprüft sowie kritisch gewürdigt und hinterfragt. Ein vom Aufsichtsrat erstellter Katalog listet die Arten von Geschäften auf, zu deren Durchführung der Vorstand der Zustimmung des Aufsichtsrats bedarf. Der Katalog wird laufend auf erforderliche Anpassungen überprüft und wurde zuletzt im Geschäftsjahr 2010 aktualisiert. Die betreffenden Geschäfte haben wir eingehend geprüft und mit dem Vorstand diskutiert, wobei der Nutzen und die Auswirkungen des jeweiligen Geschäfts im Mittelpunkt standen. Der Aufsichtsrat stimmte allen ihm zur Zustimmung vorgelegten Geschäften zu.

Der Aufsichtsratsvorsitzende wurde auch zwischen den Sitzungsterminen des Aufsichtsrats und seiner Ausschüsse vom Vorstand ausführlich informiert. So führten der Vorstandssprecher bzw. ab Februar 2010 die beiden Vorstandssprecher und der Vorsitzende des Aufsichtsrats regelmäßige Gespräche, um die Strategie, die aktuelle Geschäftsentwicklung und -lage, das Risikomanagement sowie wesentliche Einzelthemen und Entscheidungen zu erörtern. Über wichtige Ereignisse, die von wesentlicher Bedeutung für die Beurteilung der Lage und Entwicklung sowie für die Leitung der SAP waren, wurde der Vorsitzende des Aufsichtsrats unverzüglich durch die Vorstandssprecher informiert.

#### **SITZUNGEN DES AUFSICHTSRATS**

Im Geschäftsjahr 2010 fanden vier ordentliche und vier außerordentliche Sitzungen statt. In diesen Sitzungen wurden die Beschlüsse des Aufsichtsrats gefasst, mit Ausnahme von vier Beschlüssen, die im Umlaufverfahren gefasst wurden. Neben dem von Oracle angestregten TomorrowNow-Rechtsstreit, über den wir weiter unten in einem separaten Abschnitt berichten, hat der Aufsichtsrat in seinen Sitzungen insbesondere über folgende Themen beraten und, soweit erforderlich, Beschluss gefasst:

#### **Außerordentliche Sitzung im Februar**

In seiner außerordentlichen Sitzung am 7. Februar 2010 entschied der Aufsichtsrat im Einvernehmen mit dem damaligen

Vorstandssprecher Léo Apotheker, dessen Mandat als Vorstandsmitglied nicht zu verlängern. Daraufhin legte Léo Apotheker sein Vorstandsmandat ebenfalls im Einvernehmen mit dem Aufsichtsrat mit sofortiger Wirkung nieder. Am gleichen Tag ernannte der Vorstand mit Zustimmung des Aufsichtsrats die beiden Vorstandsmitglieder Bill McDermott, verantwortlich für Vertrieb, und Jim Hagemann Snabe, verantwortlich für Produktentwicklung, zu gleichberechtigten Vorstandssprechern. Zugleich bestellte der Aufsichtsrat Vishal Sikka mit sofortiger Wirkung zum Vorstandsmitglied bis zum 31. Dezember 2012.

#### **Februar-Sitzung**

In der Sitzung am 11. Februar 2010 befasste sich der Aufsichtsrat auf Basis eines Berichts des Personalausschusses sehr intensiv mit der Vergütung des Vorstands für die Geschäftsjahre 2009 und 2010 sowie weiteren Personalangelegenheiten. Dabei stellten wir für das Geschäftsjahr 2009 erstmals als Gesamtgremium die Vorstandstantieme anhand der vertraglichen Zielvorgaben und der tatsächlichen Zielerreichung für die anspruchsberechtigten ehemaligen und aktuellen Vorstandsmitglieder Léo Apotheker, Werner Brandt, Erwin Gunst, Jim Hagemann Snabe, Bill McDermott, Gerhard Oswald, John Schwarz und Henning Kagermann fest. Für die Vorstandsvergütung 2010 hat der Aufsichtsrat das am 5. August 2009 in Kraft getretene Gesetz zur Angemessenheit der Vorstandsvergütung beachtet. Dies bedeutete die Notwendigkeit einer Anpassung des Vorstandsvergütungsmodells bei der SAP AG. Allerdings hatte der Aufsichtsrat bei der Festsetzung der Gesamtbezüge der einzelnen Vorstandsmitglieder schon in der Vergangenheit dafür zu sorgen, dass die Gesamtbezüge in einem angemessenen Verhältnis zu den Aufgaben des Vorstandsmitglieds und zur Lage der Gesellschaft stehen. Das neue Gesetz führte jedoch zusätzliche Kriterien für die Ermittlung einer angemessenen Vergütung des Vorstands ein. Daraufhin erarbeitete der Vorsitzende des Aufsichtsrats einen Vorschlag zur Vorstandsvergütung für das Jahr 2010, der vom Personalausschuss grundsätzlich übernommen und nach ausführlicher Diskussion auch vom Gesamtgremium befürwortet wurde. Dabei wurde auch der Inhalt eines Gutachtens zur Angemessenheit der Vorstandsvergütung berücksichtigt, das der Aufsichtsrat bei der Beratungsgesellschaft Towers Watson eingeholt hatte. Auf Wunsch des Personalausschusses wurde präzisierend vereinbart, dass dieser bis zur Sitzung im März 2010 den Vorschlag für die Zielvorgaben für die Zielgrößen (die sogenannten Key Performance Indicators, KPIs) überarbeitet, auf denen die variablen Vergütungsbestandteile Short Term Incentive (STI) und

---

Mid Term Incentive (MTI) beruhen. Mit diesem Vorbehalt stellte der Aufsichtsrat durch Beschluss generell die Angemessenheit von Höhe und Grundstruktur der vorgeschlagenen Vorstandsvergütung für das Jahr 2010 fest. Dies beinhaltete auch die betragsmäßige Aufteilung der variablen Vergütung auf die Vergütungsteile STI, MTI und Long Term Incentive (LTI) bei einer jeweiligen 100%igen Zielerreichung. Die endgültige Beschlussfassung über die Struktur und die Festsetzung der individualisierten Gehälter für die aktuellen Vorstandsmitglieder für das Geschäftsjahr 2010 wurde auf die März-Sitzung vertagt.

Nachdem Erwin Gunst aus gesundheitlichen Gründen zum 31. Januar 2010 als Vorstand zurückgetreten war, wurde dem Vorstandsmitglied Werner Brandt das Amt des Arbeitsdirektors kommissarisch übertragen. Zudem verlängerte der Aufsichtsrat die Bestellung von Gerhard Oswald als Vorstandsmitglied der SAP AG für den Zeitraum vom 1. Januar 2011 bis zum 31. Dezember 2011. Wir beschlossen ferner die wesentlichen Modalitäten der Vertragsbeendigungen für die Vorstandsmitglieder Léo Apotheker, Erwin Gunst sowie John Schwarz, der mit Wirkung vom 11. Februar 2010 von seinem Vorstandsamt mit Zustimmung des Aufsichtsrats zurückgetreten war.

Des Weiteren diskutierten wir die Finanzergebnisse des vierten Quartals und des Gesamtjahres 2009 sowie die Geschäftsentwicklung und die Umsetzung der Unternehmensstrategie im Geschäftsjahr 2009. Zudem erörterten wir die zuvor vom Vorstand näher erläuterte Strategie für das Geschäftsjahr 2010 und stimmten der vom Vorstand vorgelegten Jahresplanung 2010 sowie der Investitions- und Liquiditätsplanung für das Geschäftsjahr 2010 zu.

Außerdem stimmte der Aufsichtsrat in dieser Sitzung der Ernennung von Steve Watts zum Regional President für die Region Asien-Pazifik-Japan sowie der Ernennung von Peter Lorenz zum Corporate Officer des SAP-Konzerns zu. Wir ließen uns außerdem vom Vorstand über das Ergebnis der 2009 durchgeführten Mitarbeiterbefragung und deren Nachbearbeitung informieren. Der Corporate-Governance-Beauftragte berichtete in seinem Jahresbericht, dass er für das Geschäftsjahr 2010 keine Verletzungen der jeweils geltenden Regelungen feststellen konnte. Ferner erstattete der Compliance-Beauftragte für Insiderrecht seinen jährlichen Bericht. Zudem erörterte der Aufsichtsrat die Ergebnisse der letzten Umfrage zur Überprüfung der Effizienz der Tätigkeit des Aufsichtsrats

gemäß Ziffer 5.6 DCGK. Die Ergebnisse waren vom Aufsichtsratsvorsitzenden ausgewertet und den Mitgliedern schriftlich zugeleitet worden. Der Aufsichtsrat befasste sich mit einem Bericht des Sonderausschusses betreffend die Ermittlung und Aufarbeitung des dem TomorrowNow-Rechtsstreit zugrunde liegenden Sachverhalts (siehe auch Abschnitt zum TomorrowNow-Rechtsstreit). Der Technologie- und Strategieausschuss berichtete über seine Befassung mit dem Produkt SAP Business ByDesign, der hauptspeicherbasierten Technologie (In-Memory-Technologie) und der Open-Source-Strategie der SAP.

### **März-Sitzung**

Anhand des Berichts des Personalausschusses über dessen Sitzungen vom 16. Februar und 24. März 2010 beschäftigte sich der Aufsichtsrat in der Sitzung am 25. März 2010 ausführlich mit der endgültigen Struktur der künftigen neuen Vorstandsvergütung, einschließlich der konkret festzulegenden Vergütung des Vorstands für das Geschäftsjahr 2010, sowie weiteren Vorstandsangelegenheiten.

Wir beschlossen dabei zum einen die in der Februar-Sitzung noch offengebliebene Festlegung der KPIs und ihrer Zielvorgaben für das Geschäftsjahr 2010 beim Short Term Incentive (STI) und Mid Term Incentive (MTI) sowie die wesentlichen Eckdaten des Long Term Incentive (LTI). Zum anderen wurden die einzelnen Vergütungselemente der Vorstandsvergütung und ihre Angemessenheit ausführlich erörtert. Daraufhin stimmten wir der kompletten neuen Vergütungsstruktur für den Vorstand auf Basis der neuen Vorschläge des Personalausschusses und unserer Beschlussfassung in der Februar-Sitzung zu. Zudem legten wir für jedes Vorstandsmitglied die individuelle Vergütung nebst allen Nebenleistungen für das Geschäftsjahr 2010 fest. Die neue Vergütungsstruktur ist in der Darstellung zu Punkt 5 der Tagesordnung der Hauptversammlung am 8. Juni 2010 genau beschrieben. Diese ist über folgenden Link erreichbar: [www.sap.com/germany/about/governance/pdf/HV\\_Darstellung\\_des\\_Verguetungssystems\\_2010.pdf](http://www.sap.com/germany/about/governance/pdf/HV_Darstellung_des_Verguetungssystems_2010.pdf). Wir ermächtigten den Personalausschuss, mit den Vorstandsmitgliedern entsprechende Anstellungsverträge für die Dauer der jeweiligen Bestellperiode abzuschließen.

Ferner wurden in der März-Sitzung einzelne noch offene Modalitäten der Beendigung der Vorstandsverträge mit Léo Apotheker und John Schwarz beschlossen.



---

Seitdem die Vergütung der Mitglieder des Aufsichtsrats zuletzt im Geschäftsjahr 2006 angepasst wurde, sind die Anforderungen an Aufsichtsratsmitglieder und deren Arbeitsbelastung, insbesondere auch hinsichtlich der Tätigkeit in Ausschüssen, beständig gestiegen. Vor diesem Hintergrund beschloss der Aufsichtsrat, der Hauptversammlung im Juni 2010 eine bereits für das Geschäftsjahr 2010 wirksame Vergütungsanpassung in der Satzung vorzuschlagen, die an das Niveau sowie das Verhältnis von fester und variabler Vergütung in vergleichbaren Unternehmen angepasst ist. Hierbei wurde ebenfalls ein Gutachten von Towers Watson berücksichtigt. Die Hauptversammlung 2010 folgte diesem Beschlussvorschlag des Aufsichtsrats.

In einem weiteren Schwerpunkt beschäftigte sich der Aufsichtsrat in der März-Sitzung mit der Rechnungslegung und Konzernrechnungslegung der SAP AG für das Geschäftsjahr 2009, mit den von der KPMG AG Wirtschaftsprüfungsgesellschaft (KPMG) durchgeführten Abschlussprüfungen und mit dem Vorschlag des Vorstands für die Verwendung des im Geschäftsjahr 2009 erzielten Bilanzgewinns der SAP AG. Der Prüfungsausschuss berichtete unter anderem über Art und Umfang seiner Prüfung der Abschlussunterlagen und empfahl dem Aufsichtsrat deren Billigung. An der Bilanzsitzung nahm der Abschlussprüfer teil und berichtete eingehend über seine Prüfung und seine Prüfungsergebnisse. Die Prüfungsergebnisse wurden mit dem Aufsichtsrat diskutiert, was die Beantwortung von Fragen durch den Abschlussprüfer einschloss. Der Aufsichtsrat erteilte dem Ergebnis der Abschlussprüfung seine Zustimmung. Nach dem abschließenden Ergebnis seiner eigenen Prüfung erhob der Aufsichtsrat keine Einwände und billigte die Abschlüsse für das Geschäftsjahr 2009. Wir prüften außerdem den Gewinnverwendungsvorschlag des Vorstands und schlossen uns diesem Vorschlag an. Darüber hinaus verabschiedeten wir unsere Beschlussvorschläge zur Tagesordnung für die Hauptversammlung im Juni 2010. Dabei folgten wir mit unserem Vorschlag an die Hauptversammlung zur Wahl des Abschlussprüfers für das Geschäftsjahr 2010 der Empfehlung des Prüfungsausschusses. Der Aufsichtsrat genehmigte verschiedene Rechtsgeschäfte zwischen der SAP AG und einzelnen Mitgliedern des Vorstands und des Aufsichtsrats. Er stimmte ferner dem Abschluss einer Haftpflichtversicherung für Aufsichtsrat, Vorstand und leitende Mitarbeiter des SAP-Konzerns (sogenannte Directors and Officers Liability Insurance, D&O-Versicherung) für den Zeitraum vom 1. April 2010 bis 1. April 2011 zu. Dabei sieht die Versiche-

rung für die Vorstandsmitglieder erstmals den gesetzlich geforderten Mindestselbstbehalt vor. Wir stimmten des Weiteren der Ernennung von Michael Kleinemeier zum Geschäftsführer der SAP Deutschland sowie zum Leiter der Vertriebsregion DACH Markets mit Zuständigkeit für die Vertriebsorganisationen in Deutschland, Österreich und der Schweiz zu.

Der Personalausschuss und der Prüfungsausschuss berichteten über ihre Arbeit in ihren beiden zuletzt durchgeführten Ausschusssitzungen. Der Bericht des Personalausschusses informierte über die in diesem Gremium erneut intensiv geführten Diskussionen über die Gestaltung der Vorstandsvergütung, die Befassung mit Aufhebungsverträgen ausscheidender Vorstandsmitglieder sowie über den Stand des Auswahlverfahrens für einen neuen Personalvorstand. Der Bericht des Prüfungsausschusses umfasste alle Themen, für die er im Zusammenhang mit der Rechnungslegung 2009 zuständig ist.

#### **Außerordentliche Sitzung im April**

In der außerordentlichen Sitzung am 14. April 2010 bestellte der Aufsichtsrat auf Vorschlag des Personalausschusses Angelika Dammann zum Mitglied des Vorstands und zur Arbeitsdirektorin der SAP AG mit Wirkung zum nächstmöglichen Zeitpunkt auf die Dauer von drei Jahren. Angelika Dammann trat ihr Amt am 1. Juli 2010 an. In der Sitzung unterrichtete uns der Vorstand über die Aktivitäten der ersten 60 Tage nach der Neuorganisation des Vorstands im Februar 2010, über die Umstrukturierung im Entwicklungsbereich und über die Planungen für die nächsten beiden Monate. Dabei ging er speziell auf die Vorbereitung der Kundenmesse SAPPHIRE NOW 2010 ein, die im Mai 2010 stattfand. Außerdem erläuterte er die mittelfristige Strategie der SAP zur Ausweitung des adressierbaren Marktes durch eine Fokussierung auf mobile Anwendungen, die Nutzung von SAP-Anwendungen in virtualisierten Rechenzentren und Datenspeichern (Cloud Computing) und auf die Nutzung von Hauptspeicherdatenbanken (In-Memory-Technologie). Der Aufsichtsrat diskutierte mit dem Vorstand die Auswirkungen der Umsetzung dieser Strategie auf Kosten und Profitabilität sowie die generellen Optionen weiterer Zukäufe. Des Weiteren informierte uns der Vorstand über die positiven Ergebnisse des ersten Quartals 2010 anhand vorläufiger Zahlen. Schließlich wurden wir über den kurz vor dem Abschluss stehenden Vergleich im Rechtsstreit mit der Firma Waste Management Inc. in den USA unterrichtet.

---

### **Außerordentliche Sitzung im Mai**

In der außerordentlichen Sitzung am 12. Mai 2010 befasste sich der Aufsichtsrat ausführlich mit der Anbahnung und Ausgestaltung des Übernahmeangebots der SAP an die Aktionäre des in Kalifornien, USA, ansässigen Unternehmens Sybase Inc. Sybase ist ein führender Anbieter von Unternehmens- und Mobilitätssoftware für das Management, die Analyse und Mobilisierung von Informationen. Der Vorstand informierte uns umfassend über die Gründe der geplanten Übernahme. Dabei betonte er, dass mit der vorgeschlagenen Akquisition ein wichtiger Schritt zur beschleunigten Umsetzung der neuen Strategie der Ausweitung des adressierbaren Marktes getan würde. Er erläuterte ausführlich die Passgenauigkeit des Zukaufs für diese Strategie, die Bewertung von Sybase und die Hintergründe für den geplanten Angebotspreis, die interne und externe Finanzierung sowie die spezifische Integrationsstrategie und die mit einer Übernahme verbundenen Chancen und Risiken. Der Vorstand hob hervor, dass Sybase weiterhin als eigenständiges Unternehmen geführt werden solle. Anschließend informierte uns der Finanz- und Investitionsausschuss über seine Sitzungen vom 10. und 11. Mai 2010, in denen er sich zum einen intensiv mit den Unterlagen zur Sybase-Akquisition befasst und die Due-Diligence-Berichte mit dem Vorstand diskutiert hatte und zum anderen in einer Videokonferenz John Chen, den Vorstandsvorsitzenden von Sybase, befragen konnte. Des Weiteren unterrichtete uns der Ausschuss darüber, dass er sich in seiner Sitzung am 12. Mai 2010 für den Erwerb von Sybase ausgesprochen hatte. Nach einer eingehenden weiteren Erörterung im Gremium ermächtigte der Aufsichtsrat den Vorstand, unter Einschaltung der Tochtergesellschaft SAP America Inc. mit Sybase ein sogenanntes Tender Offer Agreement abzuschließen und ein entsprechendes Übernahmeangebot zum Erwerb aller Aktien von Sybase zu veröffentlichen. Ferner stimmten wir dem Abschluss des Finanzierungsvertrags mit Banken einschließlich dessen Ausnutzung und Refinanzierung mittels einer Unternehmensanleihe (Corporate Bond) zu den vom Vorstand dargelegten Konditionen sowie der zur Umsetzung der Akquisition erforderlichen internen Finanzierungsstruktur unter Einbeziehung weiterer SAP-Tochtergesellschaften zu.

### **Juli-Sitzung**

In der Sitzung am 6. Juli 2010 lagen die Schwerpunkte der Beratungen des Aufsichtsrats auf dem Geschäftsverlauf im zweiten Quartal 2010, der Beurteilung des gesamten ersten Halbjahres, der Prognose für die zweite Jahreshälfte 2010

und der weiteren Planung. Der Vorstand unterrichtete uns dabei auch über die Ergebnissituation in den einzelnen Geschäftsbereichen und die allgemeine Wettbewerbssituation der SAP. Ferner informierte der Vorstand über den Stand der Neuausrichtung des Entwicklungsbereichs und erläuterte den dazu im Vorfeld der Sitzung übermittelten schriftlichen Sachstandsbericht. Er erläuterte auch die zum 30. Juli 2010 flächendeckend geplante Markteinführung der Softwarelösung SAP Business ByDesign, den künftigen Genehmigungsprozess für Entwicklungsprojekte sowie die mittelfristige Strategieplanung des SAP-Konzerns bis 2015. In dieser Strategie sind zentrale Handlungsfelder festgelegt, nämlich vor Ort beim Kunden installierte Systeme (On Premise), Software, die nach Bedarf über das Internet abgerufen wird (On Demand), und Lösungen für mobile Endgeräte (On Device), um eine neue Generation zukunftsweisender Unternehmenssoftware auf den Markt zu bringen. Dazu zählen neben der Softwarelösung SAP Business ByDesign auch das neue Produkt SAP HANA, das auf Basis von In-Memory-Technologie die Echtzeitanalyse großer Datenmengen ermöglicht, sowie zahlreiche weitere neue Produkte, Lösungen und Technologien. Viertes Handlungsfeld der Strategie ist die Orchestrierung von Anwendungen in komplexen IT-Landschaften – gleich ob On Premise, On Demand oder On Device.

Der Vorstand informierte uns zudem darüber, dass er nach dem erfolgreichen Erwerb von Sybase eine eigenständige Strategie für das Mobilitätsgeschäft der SAP ausarbeiten wird. Im Rahmen der Sybase-Finanzierung beschloss der Aufsichtsrat auf Vorschlag des Finanz- und Investitionsausschusses, dass dieser anstelle des Gesamtgremiums über Änderungsvorschläge des Vorstands zu der in der Mai-Sitzung festgelegten internen Finanzierungsstruktur entscheiden darf. Des Weiteren nahmen wir das vom Vorstand vorgestellte Konzept zur Übertragung der Venture-Aktivitäten der SAP AG auf eine neu zu gründende Tochtergesellschaft mit marktüblicher Beteiligung der künftigen Portfoliomanager zustimmend zur Kenntnis. Im Rahmen der Vorstandsvergütung 2010 beschlossen wir auf Vorschlag des Personalausschusses die in der März-Sitzung noch offengebliebenen detaillierten Planbedingungen des Long Term Incentive, den hierfür maßgeblichen Zuteilungstag und den konkreten Berechnungsweg für die Anzahl der virtuellen Optionen, die aus dem Zuteilungsbetrag zu ermitteln sind. Der Aufsichtsrat beschloss ferner auf Vorschlag des Personalausschusses für alle Vorstände eine Verlängerung der

---

Fortzahlung der Bezüge im Todesfall auf zwölf Monate. Wir befassten uns auch mit den neuen, speziell das Thema Diversität betreffenden Empfehlungen des Deutschen Corporate Governance Kodex vom 26. Mai 2010 und dem Verfahren zur Abgabe der nach § 161 AktG jährlich abzugebenden Entsprechenserklärung, die wir zuletzt am 30. Oktober 2009 veröffentlicht hatten. Da bis November 2010 keine weitere Aufsichtsratssitzung terminiert war, entschieden wir uns, die Befolgung der neuen Kodexempfehlungen bereits in dieser Sitzung zu beraten und zu beschließen. Wir verständigten uns darauf, im Oktober 2010 im Umlaufverfahren die gemeinsame Entsprechenserklärung von Vorstand und Aufsichtsrat zu verabschieden, um diese fristgerecht veröffentlichen zu können. Nach intensiver Diskussion beschlossen wir, allen neuen Kodexempfehlungen zu folgen, und baten den Vorstand mit Blick auf Ziffer 4.1.5 Deutscher Corporate Governance Kodex, bis zur ersten ordentlichen Aufsichtsratssitzung 2011 einen Plan zur Förderung der Vielfalt bei der Besetzung von Führungspositionen zu erarbeiten und in dieser Sitzung vorzustellen. Der Aufsichtsrat befasste sich zudem mit dem TomorrowNow-Rechtsstreit (siehe Abschnitt zum TomorrowNow-Rechtsstreit).

Der Personalausschuss, der Technologie- und Strategieausschuss, der Prüfungsausschuss und der Finanz- und Investitionsausschuss berichteten über ihre Arbeit in den vorhergehenden Ausschusssitzungen. Der Personalausschuss ging dabei auf die in der Sitzung des Gesamtgremiums behandelten Themen zur Vergütung des Vorstands ein. Der Bericht des Technologie- und Strategieausschusses informierte über die Strategieplanung und den Status neuer Produkte. Der Prüfungsausschuss berichtete, dass er sich mit der Wirksamkeit des internen Kontrollsystems des SAP-Konzerns, der Managementstruktur und Finanzorganisation von Sybase sowie einzelnen Compliance-Themen befasst hat. Außerdem hat der Ausschuss mit dem Abschlussprüfer KPMG das Budget für die Abschlussprüfung des SAP-Konzerns einschließlich der Prüfung des internen Kontrollsystems für das Geschäftsjahr 2010 vereinbart und die Prüfungsschwerpunkte für dieses Geschäftsjahr besprochen und festgelegt. Der Finanz- und Investitionsausschuss informierte uns über die vom Aufsichtsrat an ihn delegierte Festlegung der Bedingungen, die der Vorstand für die Unternehmensanleihe in Höhe von 1 Mrd. € zu beachten hat. Diese Anleihe wurde vom Aufsichtsrat am 30. Oktober 2009 bereits grundsätzlich genehmigt. Er berichtete außerdem über den aktuellen Stand des Erwerbs der SAP AG, über

die positive Entwicklung im arabischen Raum nach der Übernahme von Wirtschaftsgütern (darunter des exklusiven Vertriebsrechts) von SAP Arabia im Jahr 2007, den Erwerb von Sybase und die damit verbundene Finanzierungsstruktur, die Neustrukturierung der Venture-Aktivitäten und ein nicht weiterverfolgtes Akquisitionsvorhaben.

### **November-Sitzung**

Gegenstand eines außerordentlichen Tagesordnungspunkts der Aufsichtsratssitzung am 17. November 2010 war zunächst der TomorrowNow-Rechtsstreit (siehe Abschnitt zum TomorrowNow-Rechtsstreit). Themen der Aufsichtsratssitzung waren sodann der Geschäftsverlauf im dritten Quartal und die Prognose für das vierte Quartal 2010. Der Vorstand informierte uns ferner über die mittelfristigen Umsatz- und Ergebnisse sowie die Maßnahmen, die zu ihrer Erreichung erforderlich sind. Er unterrichtete uns zudem über den Stand der Neuausrichtung des Entwicklungsbereichs. Ergänzend zu seinen Ausführungen in der Juli-Sitzung ging er außerdem erneut auf die künftige Produktstrategie ein. John Chen, der Vorstandsvorsitzende von Sybase, informierte uns über das Produktangebot von Sybase für mobile Kundenanwendungen, die zu erwartende Ausweitung des Marktes für mobile Kundengeräte und für mobile Anwendungen in Unternehmen sowie den Nutzen der Sybase-Technologie für mobile Kundensysteme. Er erläuterte dabei auch Umsatzanteile und Profitabilität der verschiedenen Segmente des Sybase-Produktspektrums.

Der Vorstand unterrichtete uns außerdem über die Ergebnisse einer aktuellen stichprobenhaften Mitarbeiterumfrage, die im Anschluss an die umfassende Mitarbeiterbefragung 2009 und danach eingeleitete Maßnahmen durchgeführt wurde. Er berichtete auch, welche Folgerungen er hieraus für die weitere Umsetzung der Mitarbeiterstrategie ableitet, insbesondere hinsichtlich Mitarbeiterentwicklung und Führungsverantwortung.

Der Vorstand berichtete uns des Weiteren, dass im Rahmen des globalen Mitarbeiterbeteiligungsprogramms 2010 (SAP Share Matching Plan 2010) den Mitarbeitern der SAP AG sowie ihren Tochtergesellschaften der teilweise verbilligte Erwerb von SAP-Aktien und der Bezug von Bonusaktien im Verhältnis 3 : 1 bzw. 3 : 2 angeboten wurde. Dabei werden die Teilnehmer zum überwiegenden Teil mit eigenen Aktien der SAP AG bedient. In einigen Ländern ist es jedoch erforderlich, neue Aktien aus genehmigtem Kapital an die Teilnehmer zu



---

gewähren. Dafür hatte die Hauptversammlung bereits am 8. Juni 2010 ein genehmigtes Kapital beschlossen. Aus diesem genehmigten Kapital sollten 124.713 Aktien emittiert und an den von SAP eingeschalteten Finanzdienstleister zur Weiterleitung an die Teilnehmer des Programms übertragen werden. Damit einher ging auch eine Erhöhung des Grundkapitals der SAP AG auf 1.226.821.345 €. Der Aufsichtsrat stimmte dieser Maßnahme zu und beschloss ferner, die Satzung der SAP AG entsprechend dieser Kapitalerhöhung aus genehmigtem Kapital und der unterjährig durchgeführten Kapitalerhöhung aus bedingtem Kapital anzupassen.

Um die günstigen Kreditkonditionen für die Fremdkapitalaufnahme nutzen zu können und die finanzielle Flexibilität zu steigern, ermächtigten wir den Vorstand auf dessen Wunsch und auf Empfehlung des Finanz- und Investitionsausschusses zur Neuverhandlung der bestehenden syndizierten Kreditlinie über 1,5 Mrd. € im vierten Quartal 2010 bzw. ersten Halbjahr 2011 mit einer Laufzeit von bis zu fünf Jahren. Außerdem ermächtigten wir den Vorstand zur Aufnahme von weiterem Fremdkapital.

Auf Vorschlag des Personalausschusses beschloss der Aufsichtsrat angesichts der im Geschäftsjahr 2010 getätigten Akquisitionen die Anpassung der Zielvorgaben für die KPI des Short Term Incentive (STI) und Mid Term Incentive (MTI) bei der Vorstandsvergütung für 2010. Zur Vorbereitung auf die im ersten Quartal 2011 anstehende Überprüfung der Vergütung des Vorstands beschloss wir ebenfalls auf Empfehlung des Personalausschusses, ein entsprechendes Gutachten einer unabhängigen externen Beratungsfirma einzuholen. Dieses soll veränderte Marktdaten und die SAP-interne Gehaltsentwicklung berücksichtigen.

Der Aufsichtsrat stellte außerdem fest, dass ihm auf Seiten der Anteilseigner eine ausreichende Anzahl unabhängiger Mitglieder angehört. Einige Mitglieder des Aufsichtsrats stehen gegenwärtig oder standen im Berichtsjahr entweder selbst oder mit Unternehmen, in denen sie eine hochrangige Position bekleiden oder an denen sie wesentlich beteiligt sind, mit SAP in Geschäftsbeziehungen. Die Geschäfte der SAP mit diesen Unternehmen, die für SAP nicht wesentlich sind, erfolgen bzw. erfolgten dabei zu Bedingungen wie unter fremden Dritten. Diese Geschäfte berühren nach unserer Einschätzung nicht die Unabhängigkeit der betroffenen Mitglieder des Aufsichtsrats. Im Zuge der turnusmäßigen Überprüfung der

Effizienz der Tätigkeit des Aufsichtsrats gemäß Ziffer 5.6 DCGK wurde der für diesen Zweck entwickelte Fragebogen im August 2010 an die Aufsichtsräte versendet. Die vom Aufsichtsratsvorsitzenden ausgewerteten Ergebnisse der Umfrage wurden den Mitgliedern vor der Sitzung schriftlich zugeleitet und in der Sitzung ausführlich erörtert.

Der Finanz- und Investitionsausschuss, der Personalausschuss, der Technologie- und Strategieausschuss und der Prüfungsausschuss berichteten über ihre Arbeit in den vorhergehenden Ausschusssitzungen. Der Personalausschuss ging dabei auf die in der Sitzung des Gesamtgremiums behandelte Anpassung der Zielvorgaben für die KPI des STI und MTI für die Vorstandsvergütung 2010 und die Notwendigkeit eines externen Vergütungsgutachtens ein. Er berichtete, dass er sich auch mit der Frage beschäftigt hatte, wie viele Aufsichtsratsmandate die Vorstände der SAP AG maximal in konzernexternen Unternehmen halten sollten. Der Bericht des Technologie- und Strategieausschusses befasste sich mit der Integration von Sybase sowie deren Auswirkungen auf die Produktstrategie und ihre geplante Umsetzung. Zentrales Thema waren die künftige Entwicklung der mobilen Anwendungen und die Strategie zur weiteren Verbesserung der Benutzerfreundlichkeit von SAP-Produkten. Der Prüfungsausschuss informierte uns über seine Befassung mit dem Abschluss für das dritte Quartal 2010 und seine dahingehende Diskussion mit dem Abschlussprüfer. Sein Bericht beschäftigte sich ferner mit der anstehenden Bewertung der Sybase-Akquisition im Jahresabschluss 2010, der Anwendung der Konzernrichtlinien bei Sybase, der Compliance und der internen Revision sowie der vom Ausschuss für 2011 geplanten Beratungsgegenstände.

#### **Außerordentliche Sitzung im November**

In der außerordentlichen Sitzung am 28. November 2010 befasste sich der Aufsichtsrat mit der Entscheidung der Geschworenen (Jury) des Bundesbezirksgerichts für den Distrikt Nordkalifornien vom 23. November 2010 im TomorrowNow-Rechtsstreit (siehe Abschnitt zum TomorrowNow-Rechtsstreit).

#### **Umlaufbeschlüsse**

Im Mai 2010 stimmte der Aufsichtsrat auf Empfehlung des Personalausschusses im Umlaufverfahren der Vorstandsvergütung von Angelika Dammann zu. Darüber hinaus verabschiedeten wir im Oktober 2010 im Umlaufverfahren die gemeinsame Entsprechenserklärung von Vorstand und Aufsichtsrat,

---

wie in unserer Juli-Sitzung festgelegt. Im Dezember 2010 schließlich stimmten wir im Umlaufverfahren der Ernennung von Franck Cohen zum Regional President der Region EMEA und der Ernennung von Robert Courteau zum Regional President der Region Nordamerika zu.

### **BEHANDLUNG DES TOMORROWNOW-RECHTSSTREITS IM AUFSICHTSRAT**

Der Aufsichtsrat hat 2008 zur Begleitung des von Oracle gegen die SAP AG und ihre Tochtergesellschaften SAP America und TomorrowNow in den USA angestregten Rechtsstreits (TomorrowNow-Rechtsstreit) einen Sonderausschuss eingesetzt. Der Sonderausschuss stand zu diesem Zweck auch im Geschäftsjahr 2010 in Kontakt mit dem Vorstand und den von diesem beauftragten US-Rechtsanwälten. Er verfolgte die Entwicklung des Rechtsstreits auf der Grundlage der ihm vom Vorstand und von den US-Rechtsanwälten gegebenen Informationen und wurde zusätzlich durch anwaltliche Berater unterstützt, die der Aufsichtsrat zur rechtlichen Begleitung des Ausschusses beauftragt hatte. Die Entwicklung des TomorrowNow-Rechtsstreits sowie mögliche daraus folgende Konsequenzen wurden im Rahmen eines außerordentlichen Tagesordnungspunkts der ordentlichen Aufsichtsratssitzung am 17. November 2010 im Aufsichtsratsplenum ausführlich diskutiert, wobei die anwaltlichen Berater des Aufsichtsrats dazu vortrugen. Mit Blick auf die Entwicklung des Rechtsstreits beschloss der Aufsichtsrat am 17. November 2010, den bisher dreiköpfigen Sonderausschuss um die Aufsichtsratsmitglieder Wilhelm Haarmann, Lars Lamadé und Stefan Schulz zu erweitern. Darüber hinaus beschloss der Aufsichtsrat, sich angesichts der komplexen US-rechtlichen Fragestellungen künftig auch durch ein US-Anwaltsbüro beraten zu lassen. In der außerordentlichen Aufsichtsratssitzung am 28. November 2010 berichteten die mit der Prozessführung von SAP beauftragten US-Rechtsanwälte anlässlich des Spruchs der Jury des Bundesbezirksgerichts für den Distrikt Nordkalifornien vom 23. November 2010 dem Aufsichtsrat ausführlich über die Entwicklung des Rechtsstreits. Sie informierten insbesondere über den Hintergrund des Juryspruchs, die diesem zugrunde liegenden wesentlichen Erwägungen sowie mögliche Rechtsmittel. Auf dieser Grundlage erörterte und analysierte der Aufsichtsrat im Einzelnen mögliche Konsequenzen des Juryspruchs auf der Ebene der SAP AG. Darüber hinaus beschloss der Aufsichtsrat in dieser Sitzung im Sinne einer engen Begleitung und Unterstützung des Vorstands, dass sämtliche prozessleitenden Entscheidungen im TomorrowNow-

Rechtsstreit der Zustimmung des Aufsichtsrats bedürfen. In Telefonkonferenzen am 15. und am 30. Dezember 2010 beschäftigte sich auch der Sonderausschuss noch einmal mit dem Stand des Rechtsstreits. Eine vorläufige Bewertung möglicher Konsequenzen des TomorrowNow-Rechtsstreits auf der Ebene der SAP AG hatten der Sonderausschuss bereits in seiner Sitzung am 3. Februar 2010 und der Aufsichtsrat in seinen Sitzungen am 11. Februar und 6. Juli 2010 vorgenommen.

### **DIE ARBEIT IN DEN AUSSCHÜSSEN DES AUFSICHTSRATS**

Die Ausschüsse des Aufsichtsrats haben uns durch ihre Arbeit effektiv unterstützt. Tätig waren der Präsidialausschuss, der Personalausschuss, der Finanz- und Investitionsausschuss, der Prüfungsausschuss, der Technologie- und Strategieausschuss sowie der Sonderausschuss.

Zu den Aufgaben des sechsköpfigen **Präsidialausschusses** gehören unter anderem die Koordination der Aufsichtsratsarbeit und die Behandlung von Themen aus dem Bereich Corporate Governance. Vorsitzender des Präsidialausschusses ist Hasso Plattner.

Der aus fünf Mitgliedern bestehende **Personalausschuss**, dem ebenfalls Hasso Plattner vorsitzt, bereitet die dem Aufsichtsrat obliegenden Personalentscheidungen vor, insbesondere im Hinblick auf das Vergütungssystem und die Vergütungshöhe für den Vorstand. Er beschäftigt sich mit der kurz-, mittel- und langfristigen Planung der Besetzung von Vorstandspositionen und betreibt die Suche nach und die Vorauswahl von Vorstandsmitgliedern. Er ist ferner zuständig für Abschluss, Änderung und Aufhebung der Anstellungsverträge der Vorstandsmitglieder.

Der vierköpfige **Finanz- und Investitionsausschuss** ist zuständig für Finanzierungsfragen sowie Akquisitionen und Minderheitsbeteiligungen. Vorsitzender des Finanz- und Investitionsausschusses ist Wilhelm Haarmann.

Der **Prüfungsausschuss** ist für Fragen der Rechnungslegung und Abschlussprüfung sowie für die Überwachung des internen Kontrollsystems, des Risikomanagementsystems, des internen Revisionssystems und der Compliance zuständig. Er besteht aus vier Mitgliedern. Insbesondere der Ausschussvorsitzende, Erhard Schipporeit, qualifiziert sich aufgrund seiner langjährigen Tätigkeit als Finanzvorstand eines auch in den USA börsennotierten DAX-Konzerns als unabhängiger Finanz-

---

experte sowohl im Sinne von § 100 Abs. 5 AktG. als auch nach den entsprechenden US-amerikanischen Vorschriften.

Der aus neun Aufsichtsratsmitgliedern zusammengesetzte **Technologie- und Strategieausschuss** überprüft regelmäßig die Produktstrategie im Hinblick auf die Entwicklung und den Einsatz von Technologien und Software. Er berät den Vorstand bei technologischen und strategischen Entscheidungen sowie geplanten Investitionen in Forschung und Entwicklung. Außerdem beobachtet er die Umsetzung der Produktstrategie. Der Ausschuss verfolgt alle wichtigen Trends im Markt, die für die Produkte und Dienstleistungen von SAP relevant sind, und bewertet die Technologien, die benötigt werden, um die führende Position der SAP zu behaupten und auszubauen. Der Ausschuss steht unter dem Vorsitz von Hasso Plattner.

Der daneben bestehende **Vermittlungsausschuss** ist gesetzlich vorgeschrieben, tritt aber nur dann zur Erarbeitung von Personalvorschlägen zusammen, wenn die für die Bestellung oder Abberufung von Vorstandsmitgliedern nötige Zweidrittelmehrheit im Aufsichtsrat nicht erreicht wird. Sein Zusammentreten war bei der SAP bisher nie erforderlich.

Der **Nominierungsausschuss**, dessen Bildung auf einer Empfehlung des Deutschen Corporate Governance Kodex beruht und der sich ausschließlich aus Vertretern der Anteilseignerseite zusammensetzt, hat die Aufgabe, Anforderungsprofile für Aufsichtsräte der SAP zu erstellen und dem Aufsichtsrat für dessen Wahlvorschläge an die Hauptversammlung geeignete Kandidaten vorzuschlagen. Dem Nominierungsausschuss gehören drei Mitglieder an, von denen Hasso Plattner den Vorsitz innehat.

Der seit dem 17. November 2010 aus sechs Personen bestehende **Sonderausschuss** des Aufsichtsrats hat die Aufgabe, die externe Rechtsberatung des Aufsichtsrats bei der Ermittlung und Aufarbeitung des Sachverhalts betreffend den von Oracle eingeleiteten TomorrowNow-Rechtsstreit zu koordinieren und zu begleiten. Der Ausschuss steht ebenfalls unter dem Vorsitz von Hasso Plattner.

Weitere Informationen zu den Ausschüssen des Aufsichtsrats, insbesondere zu den Ausschussmitgliedern, stehen auf der Internetseite der SAP zur Verfügung: [www.sap.com/germany/about/governance/supervisory](http://www.sap.com/germany/about/governance/supervisory).

Im Einzelnen befassten sich die Ausschüsse 2010 vor allem mit folgenden Themen:

- Der **Präsidialausschuss** trat im Geschäftsjahr 2010 zu keiner Präsenzsitzung zusammen. In einem am 14. Juli 2010 von seinem Vorsitzenden initiierten Umlaufverfahren entschied er über die Verwendung eigener Aktien für die Erfüllung von Wandlungs- und Bezugsrechten aus Aktienoptionen und Wandelschuldverschreibungen, die Mitarbeitern im Rahmen von aktienorientierten Vergütungsprogrammen gewährt wurden.
- Der **Personalausschuss** trat im vergangenen Geschäftsjahr zu vier regulären Sitzungen und zwei außerordentlichen Sitzungen zusammen. Darüber hinaus wurde ein Beschluss im Umlaufverfahren gefasst. Gegenstand der Sitzungen waren insbesondere die Struktur und die Anpassung der Vorstandsvergütung an das am 5. August 2009 in Kraft getretene Gesetz zur Angemessenheit der Vorstandsvergütung. Daraus resultierend erarbeitete der Ausschuss einen Vorschlag an den Aufsichtsrat für ein neues Vergütungsmodell und bereitete die hierzu passende vertragliche Neugestaltung der Vorstandsanstellungsverträge vor. Der Personalausschuss setzte sich dabei in einer außerordentlichen Sitzung am 16. Februar 2010 ausführlich mit den Bemessungsgrundlagen und den Zielvorgaben für die maßgeblichen Zielgrößen (KPI) der Vorstandsvergütung auseinander. Darüber hinaus bereitete der Personalausschuss Beschlussvorschläge für den Aufsichtsrat im Zusammenhang mit dem Ausscheiden von Léo Apotheker, Erwin Gunst und John Schwarz sowie der Ernennung von Bill McDermott und Jim Hagemann Snabe zu Vorstandssprechern vor. Der Vorschlag für die Vertragskonditionen der Ernennung von Angelika Dammann wurde vom Personalausschuss im April 2010 in einem Umlaufverfahren festgelegt. In der Sitzung vom 5. Juli 2010 bereitete der Personalausschuss die Planbedingungen der Zuteilung von virtuellen Aktienoptionen für den Vorstand im Jahr 2010 vor. In seiner Sitzung vom 16. November 2010 befasste sich der Personalausschuss mit den Auswirkungen der im Geschäftsjahr 2010 getätigten Akquisitionen auf die Vorstandsvergütung. Darüber hinaus beschäftigte sich der Personalausschuss in Vorbereitung der Entscheidungen zur Vorstandsvergütung im Jahr 2011 mit einer Marktanalyse und der Beauftragung eines Angemessenheitsgutachtens.

- 
- Der **Finanz- und Investitionsausschuss** hielt im vergangenen Geschäftsjahr zehn Sitzungen ab. In diesen Sitzungen behandelte er verschiedene Akquisitionsvorhaben; ein Schwerpunkt lag hierbei auf der Akquisition von Sybase. Beschlussfassungen zur Finanzierungsstruktur der Akquisition von Sybase und zur Begebung eines Corporate Bond sowie die Diskussion weiterer Finanzierungsmaßnahmen waren ebenfalls Gegenstand der Sitzungen. Der Ausschuss hat sich darüber hinaus umfassend mit dem Akquisitionsprozess befasst und diesen konstruktiv mit den Prozessverantwortlichen diskutiert. Weiterhin wurde er über die Restrukturierung der Venture-Capital-Aktivitäten der SAP informiert und erhielt schriftlichen Bericht über alle Beteiligungserwerbe der SAP im Jahr 2009.
  - Der **Prüfungsausschuss** kam im Berichtsjahr zu vier Präsenzsitzungen und zu sechs telefonisch abgehaltenen Sitzungen zusammen. Er befasste sich insbesondere mit dem Jahres- und Konzernabschluss, dem Lage- und Konzernlagebericht sowie dem Jahresbericht Form 20-F für das Geschäftsjahr 2009, der Weiterentwicklung des Risikomanagements im SAP-Konzern, der Überwachung des Rechnungslegungsprozesses, des internen Kontroll- und des Risikomanagementsystems, der Überwachung des internen Revisionssystems sowie mit der Compliance im SAP-Konzern. Außerdem bereitete er den Vorschlag des Aufsichtsrats an die Hauptversammlung zur Wahl des Abschlussprüfers für das Geschäftsjahr 2010 vor und prüfte in diesem Zusammenhang auch die Unabhängigkeit des vorgeschlagenen Abschlussprüfers. Nach der Wahl des Abschlussprüfers legte der Prüfungsausschuss gemeinsam mit dem Abschlussprüfer die Prüfungsschwerpunkte fest und vereinbarte die Höhe der Prüfungsgebühren. Der Prüfungsausschuss befasste sich kontinuierlich mit der Geschäftsentwicklung und ihren Auswirkungen auf die Rechnungslegung der SAP. Er diskutierte mit dem Vorstand die Ergebnisse des Geschäftsjahres 2009, die Quartalsergebnisse und Quartalsberichte 2010 sowie die Ergebnisse der Jahresabschlussprüfung 2009 und der quartalsweisen Durchsicht ausgewählter Softwareverträge durch den Abschlussprüfer. Der Abschlussprüfer nahm an allen Präsenzsitzungen des Prüfungsausschusses teil und berichtete ausführlich über seine Prüfungstätigkeit sowie die Ergebnisse der quartalsweisen Durchsicht ausgewählter Softwareverträge. Neben den Diskussionen in den Präsenzsitzungen informierte der Vorstand den Ausschuss jeweils vor der Bekanntgabe der vorläu-

figen Quartalszahlen in Telefonkonferenzen über den Stand der Quartalsabschlusserstellung und -prüfung und die vorläufigen Quartalsergebnisse. Zusätzlich wird der jeweilige Quartalsbericht dem Ausschuss übersandt. In Bezug auf das erste Quartal 2010 wurde der Quartalsbericht in einer separaten Telefonkonferenz zwischen Vorstand und Ausschuss vor Veröffentlichung diskutiert. Bezüglich der nachfolgenden Quartale erfolgte die Diskussion der Quartalsberichte im Rahmen der Telefonkonferenzen, die vor der Bekanntgabe der vorläufigen Quartalszahlen stattfanden.

- Der **Technologie- und Strategieausschuss** tagte im Geschäftsjahr 2010 in fünf Sitzungen. Gegenstand der Beratungen waren die wichtigsten Entwicklungen der Softwarebranche der nächsten Jahre sowie die Unternehmens- und Produktstrategie der SAP. Dabei wurde speziell die Markteinführungsstrategie für einen erfolgreichen Markteintritt der Lösung SAP Business ByDesign erörtert. Zudem wurden die Kernelemente der SAP-Produktstrategie betrachtet: klassische, vor Ort beim Kunden installierte Systeme (On Premise), Software, die nach Bedarf über das Internet abgerufen wird (On Demand), und Lösungen für mobile Endgeräte (On Device). Außerdem behandelte der Ausschuss die Integration von Sybase-Produkten in das Produktportfolio der SAP sowie die Strategie zur weiteren Verbesserung der Benutzerfreundlichkeit von SAP-Produkten.
- Der **Nominierungsausschuss** tagte mangels anstehender Veränderungen bei den Anteilseignervertretern im Aufsichtsrat im Berichtsjahr nicht.
- Der **Sonderausschuss** kam im Berichtsjahr zu einer Präsenzsitzung und zwei telefonisch abgehaltenen Sitzungen zusammen (siehe Abschnitt zum TomorrowNow-Rechtsstreit).

Dank der kontinuierlichen Berichterstattung der Ausschüsse an den Gesamtaufichtsrat verfügten wir über eine breite und umfassende Informationsbasis auf allen den Ausschüssen zugewiesenen Gebieten und konnten uns intensiv mit den betreffenden Themen auseinandersetzen.



---

## **CORPORATE GOVERNANCE**

Der Corporate-Governance-Beauftragte der SAP überwachte die Einhaltung der Empfehlungen des DCGK, deren Befolgung die SAP AG erklärt hat, und berichtete dem Aufsichtsrat hierüber umfassend. Interessenkonflikte im Sinne der Ziffer 5.5.2 DCGK auf Seiten der Mitglieder des Aufsichtsrats sind nicht aufgetreten.

Dem Abschluss von Verträgen mit Aufsichtsratsmitgliedern, der der Zustimmung des Aufsichtsrats bedarf, wurde die erforderliche Zustimmung erteilt.

Über die Umsetzung des DCGK im Einzelnen berichten Vorstand und Aufsichtsrat in ihrem Corporate-Governance-Bericht. Zudem hat der Aufsichtsrat die Erklärung des Vorstands zur Unternehmensführung gemäß § 289a HGB eingehend geprüft und im Zusammenhang mit dem Lagebericht gebilligt sowie sich diese Erklärung auch inhaltlich vollständig zu eigen gemacht.

## **JAHRES- UND KONZERNRECHNUNGSLEGUNG FÜR DAS GESCHÄFTSJAHR 2010**

Wie in den Vorjahren wurde die Rechnungslegung und Konzernrechnungslegung der SAP AG für das Geschäftsjahr 2010 durch die KPMG geprüft. Die Hauptversammlung hatte die KPMG am 8. Juni 2010 auf Vorschlag des Aufsichtsrats, der einer Empfehlung des Prüfungsausschusses entsprach, zum Abschlussprüfer und Konzernabschlussprüfer gewählt. Bevor der Aufsichtsrat der Hauptversammlung die KPMG als Abschlussprüfer vorschlug, hatte die KPMG gegenüber dem Aufsichtsratsvorsitzenden und dem Prüfungsausschuss bestätigt, dass keine Umstände bestehen, die ihre Unabhängigkeit als Abschlussprüfer beeinträchtigen oder Zweifel an ihrer Unabhängigkeit begründen könnten. Dabei hat die KPMG auch erklärt, in welchem Umfang im vorausgegangenen Geschäftsjahr andere Leistungen für das Unternehmen erbracht wurden bzw. für das folgende Jahr vertraglich vereinbart sind. Der Aufsichtsrat hat mit der KPMG vereinbart, dass diese ihn informiert und im Prüfungsbericht vermerkt, wenn bei der Durchführung der Abschlussprüfung Tatsachen festgestellt werden, die eine Unrichtigkeit der von Vorstand und Aufsichtsrat abgegebenen Erklärung zum DCGK ergeben. Die KPMG hat den nach den Regeln des HGB aufgestellten Jahresabschluss der SAP AG, den gemäß § 315a HGB auf der Grundlage der internationalen Rechnungslegungsstandards IFRS aufgestellten Konzernabschluss und den zusammengefassten Konzernlage-

bericht und Lagebericht der SAP AG geprüft und mit uneingeschränkten Bestätigungsvermerken versehen. Damit hat der Abschlussprüfer bestätigt, dass nach seiner Beurteilung aufgrund der bei der Prüfung gewonnenen Erkenntnisse der Jahresabschluss und der Konzernabschluss unter Beachtung der anzuwendenden Rechnungslegungsvorschriften ein den tatsächlichen Verhältnissen entsprechendes Bild der Vermögens-, Finanz- und Ertragslage der SAP AG bzw. des SAP-Konzerns vermitteln. Weiterhin hat der Abschlussprüfer bestätigt, dass der zusammengefasste Lagebericht und Konzernlagebericht im Einklang mit dem Jahres- bzw. Konzernabschluss stehen, insgesamt ein zutreffendes Bild von der Lage der SAP AG bzw. des SAP-Konzerns vermitteln und die Chancen und Risiken der zukünftigen Entwicklung zutreffend darstellen. Auch die nach US-amerikanischen Vorschriften erforderliche Prüfung des internen Kontrollsystems im Hinblick auf die Konzernrechnungslegung hat die KPMG mit der Erteilung eines uneingeschränkten Bestätigungsvermerks abgeschlossen. In diesem Testat, das im Jahresbericht Form 20-F abgedruckt ist, bestätigt der Abschlussprüfer, dass die SAP nach seiner Beurteilung in allen wesentlichen Aspekten über effektive Kontrollen im Hinblick auf die Konzernrechnungslegung verfügt. Alle Mitglieder des Prüfungsausschusses und des Aufsichtsrats erhielten rechtzeitig die genannten Abschlussunterlagen und die Prüfungsberichte der KPMG sowie den Vorschlag des Vorstands zur Verwendung des Bilanzgewinns.

Sowohl in der Sitzung des Prüfungsausschusses am 17. März 2011 als auch in der Bilanzsitzung des Aufsichtsrats am 18. März 2011 erläuterte der Vorstand den Jahresabschluss, den Lagebericht, den Konzernabschluss und den Konzernlagebericht sowie den Vorschlag des Vorstands zur Verwendung des Bilanzgewinns. Ferner wurden Fragen der Ausschuss- bzw. Aufsichtsratsmitglieder vom Vorstand beantwortet.

Der Prüfungsausschuss und der Aufsichtsrat haben die Abschlussunterlagen nach ihrer Erläuterung durch den Vorstand unter Berücksichtigung der Prüfungsberichte der KPMG geprüft. Der in der Sitzung des Prüfungsausschusses und in der Bilanzsitzung des Aufsichtsrats anwesende Abschlussprüfer berichtete dort jeweils ausführlich über die Prüfung und die Prüfungsergebnisse und erläuterte den Prüfungsbericht. Dabei informierte der Abschlussprüfer auch darüber, dass seine Prüfung keine wesentlichen Schwächen

des internen Kontroll- und des Risikomanagement-Systems bezogen auf den Rechnungslegungsprozess identifiziert hat. Der Abschlussprüfer wurde sowohl vom Prüfungsausschuss als auch vom Aufsichtsrat eingehend zu den Prüfungsergebnissen und zu Art und Umfang der Prüfungstätigkeit befragt. Ferner berichtete der Prüfungsausschuss dem Aufsichtsrat über seine eigene Prüfung der Rechnungslegung, seine Diskussionen mit dem Vorstand und dem Abschlussprüfer sowie seine Überwachung des Rechnungslegungsprozesses. Der Ausschuss berichtete ferner, dass er sich im Rahmen seiner Überwachungsfunktion mit der Wirksamkeit des internen Kontroll-, des Risikomanagement- und des internen Revisionsystems des SAP-Konzerns befasst und sich von dessen Wirksamkeit überzeugt hat.

Der Ausschuss informierte uns des Weiteren über seine durch die KPMG erfolgte Unterrichtung, dass keine Umstände vorlagen, die ihre Befangenheit während der Prüfung hätten besorgen lassen, und welche Leistungen von KPMG außerhalb der Abschlussprüfung erbracht wurden. Der Ausschuss berichtete ferner über seine Überwachung der Unabhängigkeit des Abschlussprüfers unter Berücksichtigung der erbrachten prüfungsfremden Leistungen und seine Einschätzung, dass der Abschlussprüfer die erforderliche Unabhängigkeit besitzt.

Der Prüfungsausschuss und der Aufsichtsrat konnten sich davon überzeugen, dass die Prüfung durch die KPMG ordnungsgemäß durchgeführt wurde. Sie gelangten insbesondere zu der Überzeugung, dass die Prüfungsberichte – wie auch die Prüfung selbst – den gesetzlichen Anforderungen entsprechen. Der Aufsichtsrat hat daraufhin auf Basis des Berichts und der Empfehlung des Prüfungsausschusses dem Ergebnis der Abschlussprüfung seine Zustimmung erteilt und, da auch nach dem abschließenden Ergebnis seiner eigenen Prüfung keine Einwände zu erheben waren, den Jahresabschluss, den Konzernabschluss sowie den Lagebericht (inklusive der Erklärung des Vorstands zur Unternehmensführung gemäß § 289a HGB) und den Konzernlagebericht der SAP AG gebilligt. Damit ist der Jahresabschluss festgestellt. Der Aufsichtsrat stimmt in seiner Einschätzung der Lage von Gesellschaft und Konzern mit der vom Vorstand im Lagebericht und im Konzernlagebericht zum Ausdruck gebrachten Einschätzung überein. Den vom Vorstand zuvor erläuterten Vorschlag zur Verwendung des Bilanzgewinns hat der Aufsichtsrat insbesondere unter den Gesichtspunkten der Ausschüttungspolitik, der Auswirkungen auf die Liquidität des SAP-Kon-

zerns sowie unter Berücksichtigung der Aktionärsinteressen geprüft – was eine Erörterung mit dem Abschlussprüfer einschloss. Danach stimmte er dem Gewinnverwendungsvorschlag des Vorstands zu und schloss sich diesem an.

#### **VERÄNDERUNGEN IN AUFSICHTSRAT UND VORSTAND**

Im Aufsichtsrat gab es im Berichtsjahr 2010 keine personellen Veränderungen. Wie bereits aus dem Bericht des Vorjahres ersichtlich, legte am 7. Februar 2010 der damalige Vorstandssprecher Léo Apotheker sein Vorstandsmandat nieder. Am gleichen Tag ernannte der Vorstand mit Zustimmung des Aufsichtsrats die beiden Vorstandsmitglieder Bill McDermott und Jim Hagemann Snabe zu gleichberechtigten Vorstandssprechern. Zugleich bestellte der Aufsichtsrat Vishal Sikka zum Vorstandsmitglied mit Wirkung vom 7. Februar 2010. Am 11. Februar 2010 legte John Schwarz sein Amt als Vorstand nieder. Am gleichen Tag wurde die Vorstandsbestellung von Gerhard Oswald bis Ende 2011 verlängert. Er hat zusätzlich die Zuständigkeit des Chief Operating Officer übernommen, nachdem Erwin Gunst, der zugleich Arbeitsdirektor war, aus gesundheitlichen Gründen seine Amtsgeschäfte zum 31. Januar 2010 niedergelegt hatte. Ebenfalls am gleichen Tag wurde dem Vorstandsmitglied Werner Brandt vom Aufsichtsrat das Amt des Arbeitsdirektors kommissarisch übertragen. Am 1. Juli 2010 trat Angelika Dammann ihr Vorstandsmandat an; sie war am 14. April 2010 vom Aufsichtsrat zum Mitglied des Vorstands und zur Arbeitsdirektorin der SAP AG bestellt worden.

Der Aufsichtsrat dankt den Mitgliedern des Vorstands, den Geschäftsführern der Tochtergesellschaften sowie allen Mitarbeiterinnen und Mitarbeitern für ihr hohes Engagement und ihre Leistungen im Geschäftsjahr 2010. Außerdem danken wir unseren Kunden und Partnern, die ebenfalls wesentlich zum Erfolg unseres Unternehmens beigetragen haben.



**Prof. Dr. h. c. Hasso Plattner**  
(Vorsitzender des Aufsichtsrats)  
für den Aufsichtsrat

---

# Vergütungsbericht<sup>1)</sup>

## Vergütung von Vorstand und Aufsichtsrat

---

Der Vergütungsbericht der SAP erläutert die Grundlagen für die Festlegung der Vergütung von Vorstand und Aufsichtsrat sowie deren Höhe und Struktur. Darüber hinaus werden Angaben zu den von Vorstandsmitgliedern gehaltenen aktienbasierten Vergütungsinstrumenten sowie zum Aktienbesitz von Vorstand und Aufsichtsrat und zu den gemäß Wertpapierhandelsgesetz offenzulegenden Transaktionen mit Aktien der SAP gemacht.

### VERGÜTUNG DES VORSTANDS

#### Vergütungsstruktur

2010 hat der Aufsichtsrat der SAP ein neues System zur Vergütung der Vorstandsmitglieder beschlossen, das die Gesetzeslage nach Inkrafttreten des Gesetzes zur Angemessenheit der Vorstandsvergütung (VorstAG) und die jüngsten Änderungen des Deutschen Corporate Governance Kodex wiedergibt.

Die Festlegung der Vergütung des SAP-Vorstands orientiert sich an der Größe und der globalen Ausrichtung des Unternehmens sowie an seiner wirtschaftlichen und finanziellen Lage. Darüber hinaus ist sie so bemessen, dass sie international wettbewerbsfähig ist und somit Anreize für eine engagierte und erfolgreiche Arbeit in einem dynamischen Umfeld bietet.

Die Gesamtvergütung des Vorstands ist leistungsorientiert. Sie setzt sich aus vier Komponenten zusammen:

- einem festen Jahresgrundgehalt,
- einer auf das Geschäftsjahr bezogenen variablen Vergütung (Short Term Incentive, STI),
- einer mittelfristigen, das heißt auf das Geschäftsjahr und die beiden Folgejahre bezogenen variablen Vergütung (Mid Term Incentive, MTI) und
- einer langfristigen, aktienkursbasierten Vergütung (Long Term Incentive, LTI).

Für die feste Vergütung sowie die beiden variablen Vergütungsbestandteile wird ein Jahreszielgehalt festgelegt. Das Jahreszielgehalt wird jährlich überprüft und gegebenenfalls angepasst. Grundlage dieser Überprüfung bilden die wirtschaftliche Entwicklung der SAP sowie die Vorstandsbezüge vergleichbarer internationaler Unternehmen. Für die variablen Vergütungsbe-

standteile bestimmt der Aufsichtsrat Zielgrößen, die auf den Budgetvorgaben der SAP für das jeweilige Geschäftsjahr beruhen.

Für die einzelnen Komponenten der Vorstandsvergütung des Geschäftsjahres 2010 gelten folgende Kriterien:

- Die feste Vergütung wird monatlich als Gehalt ausbezahlt.
- Die Höhe der variablen Vergütung aus dem STI hängt von der Erreichung bestimmter Zielgrößen (Key Performance Indicators, KPI) durch den SAP-Konzern ab. Die Zielgrößen für den STI 2010 sind das währungsbereinigte Umsatzwachstum bei Software- und softwarebezogenen Serviceerlösen (Non-IFRS), die währungsbereinigte operative Marge (Non-IFRS) und die sogenannte Cash Conversion Rate (das Verhältnis von Mittelzufluss aus laufender Geschäftstätigkeit zum Gewinn nach Steuern, beides Non-IFRS). Daneben enthält der STI eine Ermessenskomponente, über die der Aufsichtsrat ex post nach billigem Ermessen entscheiden kann, bei der er jedoch neben der individuellen Leistung des Vorstandsmitglieds auch die Zukunftsfähigkeit der SAP mit Blick auf die erreichte Steigerung der Marktstellung, der Innovationsleistung, der Mitarbeiterzufriedenheit, der Kundenzufriedenheit sowie der Arbeitgeberattraktivität berücksichtigen soll. Zudem ist der Aufsichtsrat berechtigt, bei außergewöhnlichen, nicht vorhersehbaren Ereignissen den Auszahlungsbetrag unter Berücksichtigung des Unternehmensinteresses ex post nach billigem Ermessen nach oben oder unten zu korrigieren. Die Höhe des Auszahlungsbetrags aus dem STI wurde in der Sitzung des Aufsichtsrats vom 10. Februar 2011 nach Prüfung der Zielerreichung festgelegt. Die Auszahlung erfolgt nach der Hauptversammlung der SAP im Mai 2011.
- Die Höhe der variablen Vergütung aus dem MTI richtet sich nach der Zielerreichung des SAP-Konzerns bezogen auf die Zielgrößen währungsbereinigtes Umsatzwachstum bei Software- und softwarebezogenen Serviceerlösen (Non-IFRS) und währungsbereinigter Gewinn pro Aktie (Non-IFRS) über die drei Geschäftsjahre 2010 bis 2012. Daneben enthält der MTI eine Ermessenskomponente, über die der Aufsichtsrat ex post nach billigem Ermessen entscheiden kann, bei der er jedoch neben der individuellen Leistung des Vorstandsmitglieds auch die Zukunftsfähigkeit der SAP mit Blick auf die in den Geschäftsjahren 2010 bis 2012 erreichte Steigerung der Marktstellung, der Innovationsleistung, der Mitarbeiterzufriedenheit, der Kundenzufriedenheit sowie der Arbeitgeberattraktivität berücksichtigen soll.

1) Dieser Vergütungsbericht ist integraler Bestandteil des geprüften, zusammengefassten Konzernlageberichts und bildet zugleich einen Teil des Corporate-Governance-Berichts.

– Die LTI-Komponente besteht aus virtuellen Aktienoptionen im Rahmen des Aktienoptionsplans SAP SOP 2010. Detaillierte Angaben zu Struktur und Ausgestaltung des SAP SOP 2010 finden sich unter Textziffer (28) des Konzernanhangs. Die Zahl der im Geschäftsjahr 2010 an die einzelnen Vorstandsmitglieder als aktienorientierte Vergütung ausgegebenen Aktienoptionen legte der Aufsichtsrat am 6. Juli 2010 mit Wirkung vom 9. September 2010 unter Berücksichtigung des Marktwertes (Fair Value) der Optionen fest.

Für die Vorstandsmitglieder Bill McDermott und Vishal Sikka wurden vertragliche Währungssicherungsklauseln vereinbart, die die Umrechnung der in Euro dotierten Vergütungen in US-Dollar festschreiben. Der mit John Schwarz vereinbarte Vertrag enthielt eine ähnliche Klausel.

### Vergütungshöhe

Für das Geschäftsjahr 2010 ergab sich für die einzelnen Mitglieder des Vorstands folgende Vergütung:

| Tsd. €                                                                        | Erfolgsunabhängige Vergütung |                         | Erfolgs-<br>bezogene<br>Vergütung | Komponenten mit<br>langfristiger<br>Anreizwirkung           | Gesamt          |
|-------------------------------------------------------------------------------|------------------------------|-------------------------|-----------------------------------|-------------------------------------------------------------|-----------------|
|                                                                               | Gehalt                       | Sonstiges <sup>1)</sup> | Tantieme (STI)                    | Aktienbasierte<br>Vergütung<br>(SAP SOP 2010) <sup>2)</sup> |                 |
| Bill McDermott (Vorstandssprecher ab 7.2.2010) <sup>3)</sup>                  | 1.355,2                      | 196,4                   | 1.920,6                           | 950,0                                                       | 4.422,2         |
| Jim Hagemann Snabe (Vorstandssprecher ab 7.2.2010)                            | 1.150,0                      | 114,5                   | 1.648,7                           | 950,0                                                       | 3.863,2         |
| Dr. Werner Brandt                                                             | 700,0                        | 18,4                    | 997,7                             | 577,0                                                       | 2.293,1         |
| Dr. Angelika Dammann (Vorstandsmitglied ab 1.7.2010)                          | 350,0                        | 106,4                   | 498,9                             | 288,5                                                       | 1.243,8         |
| Gerhard Oswald                                                                | 700,0                        | 97,6                    | 997,7                             | 577,0                                                       | 2.372,3         |
| Vishal Sikka (Vorstandsmitglied ab 7.2.2010) <sup>7)</sup>                    | 697,3                        | 215,4                   | 969,9                             | 577,0                                                       | 2.459,6         |
| Léo Apotheker<br>(Vorstandssprecher und -mitglied bis 7.2.2010) <sup>4)</sup> | 187,5                        | 37,5                    | –                                 | –                                                           | 225,0           |
| Erwin Gunst (Vorstandsmitglied bis 31.1.2010) <sup>5)</sup>                   | 113,8                        | 9,0                     | –                                 | –                                                           | 122,8           |
| John Schwarz (Vorstandsmitglied bis 11.2.2010) <sup>6)</sup>                  | 164,5                        | 7,4                     | –                                 | –                                                           | 171,9           |
| <b>Summe</b>                                                                  | <b>5.418,3</b>               | <b>802,6</b>            | <b>7.033,5</b>                    | <b>3.919,5</b>                                              | <b>17.173,9</b> |

<sup>1)</sup> Zuschüsse zu Versicherungen, geldwerte Vorteile, Aufwendungen für doppelte Haushaltsführung bei ausländischem Dienstsitz, Übernahme von Rechts- und Steuerberatungskosten, Einmalbezüge, Sicherheitsservices

<sup>2)</sup> Marktwert zum Zuteilungszeitpunkt

<sup>3)</sup> Enthält Ausgleichszahlungen aufgrund Währungssicherungsklausel: 205,2 Tsd. € Ausgleich Gehalt 2010, 271,9 Tsd. € Ausgleich Tantieme 2010

<sup>4)</sup> Die Amtszeit von Léo Apotheker als Vorstandssprecher und -mitglied endete am 7. Februar 2010. Sein Vertrag mit der SAP AG endete am 31. März 2010.

<sup>5)</sup> Die Vorstandsmitgliedschaft von Erwin Gunst endete am 31. Januar 2010. Sein Vertrag mit der SAP AG endete am 31. März 2010.

<sup>6)</sup> Die Vorstandsmitgliedschaft von John Schwarz endete am 11. Februar 2010. Sein Vertrag mit der SAP AG endete am 31. März 2010.

Enthält Ausgleichszahlungen aufgrund Währungssicherungsklausel: 4,9 Tsd. € Ausgleich Gehalt 2010.

<sup>7)</sup> Enthält Ausgleichszahlungen aufgrund Währungssicherungsklausel: 70,1 Tsd. € Ausgleich Gehalt 2010, 76,1 Tsd. € Ausgleich Tantieme 2010



Bei einer 100%igen Zielerreichung würden im Jahr 2013 die folgenden Beträge aus dem MTI 2010 gezahlt:

| Tsd. €                                               | MTI 2010<br>Auszahlung 2013 |
|------------------------------------------------------|-----------------------------|
| Bill McDermott (Vorstandssprecher ab 7.2.2010)       | 820,0                       |
| Jim Hagemann Snabe (Vorstandssprecher ab 7.2.2010)   | 820,0                       |
| Dr. Werner Brandt                                    | 495,5                       |
| Dr. Angelika Dammann (Vorstandsmitglied ab 1.7.2010) | 247,8                       |
| Gerhard Oswald                                       | 495,5                       |
| Vishal Sikka (Vorstandsmitglied ab 7.2.2010)         | 443,9                       |
| <b>Summe</b>                                         | <b>3.322,7</b>              |

Die für die aktienbasierte Vergütung 2010 angegebenen Werte resultieren aus den folgenden Zuteilungen von virtuellen Aktienoptionen im Rahmen des SAP SOP 2010:

| Zuteilung im Geschäftsjahr 2010                      |                |                                        |                                                                                                     |                                            |                                 |
|------------------------------------------------------|----------------|----------------------------------------|-----------------------------------------------------------------------------------------------------|--------------------------------------------|---------------------------------|
|                                                      | Stückzahl      | Marktwert<br>je Recht bei<br>Zuteilung | Gesamtwert bei<br>Zuteilung der<br>Vergütungskom-<br>ponenten mit<br>langfristiger<br>Anreizwirkung | Marktwert<br>je Recht<br>zum<br>31.12.2010 | Gesamtwert<br>zum<br>31.12.2010 |
|                                                      |                | €                                      | Tsd. €                                                                                              | €                                          | Tsd. €                          |
| Bill McDermott (Vorstandssprecher ab 7.2.2010)       | 135.714        | 7,00                                   | 950,0                                                                                               | 8,19                                       | 1.111,5                         |
| Jim Hagemann Snabe (Vorstandssprecher ab 7.2.2010)   | 135.714        | 7,00                                   | 950,0                                                                                               | 8,19                                       | 1.111,5                         |
| Dr. Werner Brandt                                    | 82.428         | 7,00                                   | 577,0                                                                                               | 8,19                                       | 675,1                           |
| Dr. Angelika Dammann (Vorstandsmitglied ab 1.7.2010) | 41.214         | 7,00                                   | 288,5                                                                                               | 8,19                                       | 337,5                           |
| Gerhard Oswald                                       | 82.428         | 7,00                                   | 577,0                                                                                               | 8,19                                       | 675,1                           |
| Vishal Sikka (Vorstandsmitglied ab 7.2.2010)         | 82.428         | 7,00                                   | 577,0                                                                                               | 8,19                                       | 675,1                           |
| <b>Summe</b>                                         | <b>559.926</b> |                                        | <b>3.919,5</b>                                                                                      |                                            | <b>4.585,8</b>                  |

In der nachfolgenden Tabelle ist die Gesamtvergütung des Vorstands im Geschäftsjahr 2009 inklusive der zugeteilten Aktienoptionen im Rahmen des SOP Performance Plan 2009 dargestellt:

| Tsd. €                                                                         | Erfolgsunabhängige Vergütung |                         | Erfolgs-<br>bezogene<br>Vergütung | Komponenten mit<br>langfristiger<br>Anreizwirkung           | Gesamt          |
|--------------------------------------------------------------------------------|------------------------------|-------------------------|-----------------------------------|-------------------------------------------------------------|-----------------|
|                                                                                | Gehalt                       | Sonstiges <sup>1)</sup> | Tantieme                          | Aktienbasierte<br>Vergütung<br>(SAP SOP 2009) <sup>2)</sup> |                 |
| Prof. Dr. Henning Kagermann<br>(Vorstandssprecher und -mitglied bis 31.5.2009) | 312,5                        | 7,4                     | 2.026,2                           | –                                                           | 2.346,1         |
| Léo Apotheker (Vorstandssprecher)                                              | 750,0                        | 137,3                   | 4.862,8                           | 950,0                                                       | 6.700,1         |
| Dr. Werner Brandt                                                              | 455,0                        | 19,1                    | 2.950,1                           | 577,0                                                       | 4.001,2         |
| Erwin Gunst                                                                    | 455,0                        | 36,0                    | 2.950,1                           | 577,0                                                       | 4.018,1         |
| Prof. Dr. Claus E. Heinrich (bis 31.5.2009)                                    | 189,6                        | 9,3                     | 658,8                             | –                                                           | 857,7           |
| Bill McDermott <sup>3)</sup>                                                   | 900,4                        | 74,9                    | 2.776,7                           | 577,0                                                       | 4.329,0         |
| Gerhard Oswald                                                                 | 455,0                        | 437,5                   | 2.950,1                           | 577,0                                                       | 4.419,6         |
| John Schwarz <sup>4)</sup>                                                     | 581,5                        | 28,2                    | 2.910,7                           | 577,0                                                       | 4.097,4         |
| Jim Hagemann Snaube                                                            | 455,0                        | 131,1                   | 2.950,1                           | 577,0                                                       | 4.113,2         |
| <b>Summe</b>                                                                   | <b>4.554,0</b>               | <b>880,8</b>            | <b>25.035,6</b>                   | <b>4.412,0</b>                                              | <b>34.882,4</b> |

<sup>1)</sup> Zuschüsse zu Versicherungen, geldwerte Vorteile, Aufwendungen für doppelte Haushaltsführung bei ausländischem Dienstsitz, Übernahme von Rechts- und Steuerberatungskosten, Urlaubsabgeltung

<sup>2)</sup> Marktwert zum Zuteilungszeitpunkt

<sup>3)</sup> Enthält Ausgleichszahlungen aufgrund Währungssicherungsklausel: 29,6 Tsd. €; Nachzahlung Gehalt 2008, 53,2 Tsd. €; Nachzahlung Tantieme 2008, 47,5 Tsd. €  
Ausgleich Gehalt 2009, 91,9 Tsd. €; Ausgleich Tantieme 2009

<sup>4)</sup> Enthält Ausgleichszahlungen aufgrund Währungssicherungsklausel: 5,0 Tsd. €; Ausgleich Gehalt 2009, 29,0 Tsd. €; Ausgleich Tantieme 2009

## Aktienbasierte Vergütung im Rahmen des SOP Performance Plan 2009:

### Zuteilung im Geschäftsjahr 2009

|                                                                               | Stückzahl      | Marktwert<br>je Recht<br>bei Zuteilung | Gesamtwert bei<br>Zuteilung der<br>Vergütungskom-<br>ponenten mit<br>langfristiger<br>Anreizwirkung | Marktwert<br>je Recht<br>zum<br>31.12.2009 | Gesamtwert<br>zum<br>31.12.2009 |
|-------------------------------------------------------------------------------|----------------|----------------------------------------|-----------------------------------------------------------------------------------------------------|--------------------------------------------|---------------------------------|
|                                                                               |                | €                                      | Tsd. €                                                                                              | €                                          | Tsd. €                          |
| Bill McDermott (Vorstandssprecher ab 7.2.2010)                                | 102.670        | 5,62                                   | 577,0                                                                                               | 4,89                                       | 167,4                           |
| Jim Hagemann Snabe (Vorstandssprecher ab 7.2.2010)                            | 102.670        | 5,62                                   | 577,0                                                                                               | 4,89                                       | 167,4                           |
| Dr. Werner Brandt                                                             | 102.670        | 5,62                                   | 577,0                                                                                               | 4,89                                       | 167,4                           |
| Gerhard Oswald                                                                | 102.670        | 5,62                                   | 577,0                                                                                               | 4,89                                       | 167,4                           |
| Léo Apotheker<br>(Vorstandssprecher und -mitglied bis 7.2.2010) <sup>1)</sup> | 169.040        | 5,62                                   | 950,0                                                                                               | 4,89                                       | 275,5                           |
| Erwin Gunst (Vorstandsmitglied bis 31.1.2010) <sup>2)</sup>                   | 102.670        | 5,62                                   | 577,0                                                                                               | 4,89                                       | 167,4                           |
| John Schwarz (Vorstandsmitglied bis 11.2.2010) <sup>3)</sup>                  | 102.670        | 5,62                                   | 577,0                                                                                               | 4,89                                       | 167,4                           |
| <b>Summe</b>                                                                  | <b>785.060</b> |                                        | <b>4.412,0</b>                                                                                      |                                            | <b>1.279,9</b>                  |

<sup>1)</sup> Die Amtszeit von Léo Apotheker als Vorstandssprecher und -mitglied endete am 7. Februar 2010. Sein Vertrag mit der SAP AG endete am 31. März 2010.

<sup>2)</sup> Die Vorstandsmitgliedschaft von Erwin Gunst endete am 31. Januar 2010. Sein Vertrag mit der SAP AG endete am 31. März 2010.

<sup>3)</sup> Die Vorstandsmitgliedschaft von John Schwarz endete am 11. Februar 2010. Sein Vertrag mit der SAP AG endete am 31. März 2010.

## LEISTUNGEN AN DEN VORSTAND BEI TÄTIGKEITSBEENDIGUNG

### Zusagen an den Vorstand für den Fall der Tätigkeitsbeendigung

#### Altersversorgung

Vorstandsmitglieder erhalten Pensionen von der SAP, wenn sie das Pensionierungsalter von 60 Jahren erreicht und ihre Tätigkeit als Vorstandsmitglied beendet haben (Altersrente) oder bei Berufs- oder Erwerbsunfähigkeit vor Erreichen des normalen Pensionierungsalters (Invalidenrente). Außerdem wird bei Tod

des ehemaligen Vorstandsmitglieds eine Witwenrente gezahlt. Die Invalidenrente beträgt 100 % der erreichten Altersrente und wird maximal bis zur Vollendung des 60. Lebensjahres gezahlt und dann durch die Altersrente abgelöst. Die Witwenrente beträgt 60 % der gezahlten Rente oder der Anwartschaft auf Invalidenrente zum Zeitpunkt des Todes. Auf die zugesagten Leistungen besteht ein Rechtsanspruch gegen die Gesellschaft.

Bei Beendigung des Dienstverhältnisses vor Erreichen des Pensionierungsalters von 60 Jahren wird der Rentenanspruch anteilig im Verhältnis der erreichten Betriebszugehörigkeit (Diensteintritt bis Dienstaustritt) zur maximal möglichen Betriebszugehörigkeit ermittelt.

---

Zum 1. Januar 2000 führte die SAP AG ein beitragsorientiertes Versorgungssystem ein. Der Versorgungsbeitrag beträgt 4 % der anrechenbaren Bezüge bis zur anrechenbaren Beitragsbemessungsgrenze zuzüglich 14 % der anrechenbaren Bezüge oberhalb der anrechenbaren Beitragsbemessungsgrenze. Als anrechenbare Bezüge gelten 180 % des Jahresgrundgehalts. Anrechenbare Beitragsbemessungsgrenze ist die jeweils gültige jährliche Beitragsbemessungsgrenze (West) in der deutschen gesetzlichen Rentenversicherung.

Mit folgenden Vorstandsmitgliedern wurden abweichende Vereinbarungen zur Altersversorgung getroffen:

- Für Bill McDermott und Vishal Sikka besteht jeweils eine Anwartschaft im Pensionsplan der SAP America, Inc. Der Pensionsplan der SAP America ist ein Cash Balance Plan und sieht im Falle der Pensionierung eine monatliche Rentenzahlung oder wahlweise eine Kapitalzahlung vor. Der Pensionsplan stellt die Leistung nach Vollendung des 65. Lebensjahres zur Verfügung. Unter bestimmten Voraussetzungen sieht der Pensionsplan auch vorgezogene Leistungen beziehungsweise Leistungen im Falle der Invalidität vor. Der Pensionsplan der SAP America wurde zum 1. Januar 2009 geschlossen. Die erdiente Anwartschaft wird weiterhin verzinst. Darüber hinaus zahlt die SAP für Bill McDermott und Vishal Sikka Versorgungsbeiträge an einen externen Versorgungsplan. Die Höhe der Beiträge der SAP hängt von der Höhe der Beiträge ab, die Bill McDermott und Vishal Sikka dem Versorgungsplan zuführen. Im Zuge der Schließung des Pensionsplans der SAP America hat die SAP die Versorgungsbeiträge an diesen externen Versorgungsplan angepasst. Im Geschäftsjahr 2010 zahlte die SAP für Bill McDermott Beiträge in Höhe von 765,7 Tsd. € (2009: 199,6 Tsd. €) und für Vishal Sikka in Höhe von 153,2 Tsd. €.

- Für Jim Hagemann Snabe zahlt die SAP anstelle einer Anwartschaft im Pensionsplan der Vorstandsmitglieder entsprechende Beiträge an einen externen Versorgungsplan. Im Geschäftsjahr 2010 entrichtete die SAP Beiträge in Höhe von 283,1 Tsd. € (2009: 108,4 Tsd. €).
- Die für Gerhard Oswald bestehende leistungsorientierte Altersversorgung wurde zeitgleich mit der Einführung des beitragsorientierten Versorgungssystems abgelöst. Damit ergeben sich die Leistungen zum einen aus der bis zum 31. Dezember 1999 auf Basis der bisherigen leistungsorientierten Zusage ermittelten erworbenen Anwartschaft sowie zum anderen aus einem gehaltsabhängigen Versorgungsbeitrag für die Zeit ab dem 1. Januar 2000.
- Der Versorgungsbeitrag für Léo Apotheker, dem nur Altersrenten-, aber keine Witwenrenten- und Berufsunfähigkeitsleistungen zugesagt sind, berücksichtigt dessen Mitgliedschaft in der französischen Sozialversicherung. Hierbei erfolgt eine Anrechnung der entsprechenden Arbeitgeberbeiträge der SAP in das französische Sozialversicherungssystem.
- John Schwarz hat in den Geschäftsjahren 2009 und 2010 keine Altersversorgungsleistungen bezogen.

Die folgende Übersicht zeigt die Veränderung der dynamischen Pensionsverpflichtung (Projected Benefit Obligation, PBO) insgesamt sowie der Rückstellungen für die gegenüber den Vorstandsmitgliedern bestehenden Pensionsverpflichtungen insgesamt:



| Tsd. €                                                          | Bill McDermott<br>(Vorstands-<br>sprecher ab<br>7.2.2010) | Dr. Werner<br>Brandt | Dr. Angelika<br>Dammann<br>(Vorstands-<br>mitglied ab<br>1.7.2010) | Gerhard<br>Oswald | Vishal Sikka<br>(Vorstands-<br>mitglied<br>ab 7.2.2010) | Léo Apotheker<br>(Vorstands-<br>sprecher<br>und -mit-<br>glied bis<br>7.2.2010) | Erwin Gunst<br>(Vorstands-<br>mitglied bis<br>31.1.2010) | Summe          |
|-----------------------------------------------------------------|-----------------------------------------------------------|----------------------|--------------------------------------------------------------------|-------------------|---------------------------------------------------------|---------------------------------------------------------------------------------|----------------------------------------------------------|----------------|
| PBO per 1.1.2009                                                | 955,0                                                     | 701,8                | –                                                                  | 3.099,1           | –                                                       | 439,8                                                                           | 389,2                                                    | 5.584,9        |
| ./. Verkehrswert Plan Assets per 1.1.2009                       | 33,3                                                      | 624,0                | –                                                                  | 2.636,6           | –                                                       | 658,8                                                                           | 48,1                                                     | 4.000,8        |
| <b>Rückstellung per 1.1.2009</b>                                | <b>921,7</b>                                              | <b>77,8</b>          | <b>–</b>                                                           | <b>462,5</b>      | <b>–</b>                                                | <b>–219,0</b>                                                                   | <b>341,1</b>                                             | <b>1.584,1</b> |
| Veränderung PBO im Jahr 2009                                    | 3,1                                                       | 201,0                | –                                                                  | 527,1             | –                                                       | 88,4                                                                            | 92,0                                                     | 911,6          |
| Veränderung Plan Assets im Jahr 2009                            | 9,2                                                       | 31,1                 | –                                                                  | 237,6             | –                                                       | 29,2                                                                            | 97,4                                                     | 404,5          |
| PBO per 31.12.2009                                              | 958,1                                                     | 902,8                | –                                                                  | 3.626,2           | –                                                       | 528,2                                                                           | 481,2                                                    | 6.496,5        |
| ./. Verkehrswert Plan Assets per 31.12.2009                     | 42,5                                                      | 655,1                | –                                                                  | 2.874,2           | –                                                       | 688,0                                                                           | 145,5                                                    | 4.405,3        |
| <b>Rückstellung per 31.12.2009</b>                              | <b>915,6</b>                                              | <b>247,7</b>         | <b>–</b>                                                           | <b>752,0</b>      | <b>–</b>                                                | <b>–159,8</b>                                                                   | <b>335,7</b>                                             | <b>2.091,2</b> |
| <b>Rückstellung per 1.1.2010<br/>(neue Vorstandsmitglieder)</b> | <b>–</b>                                                  | <b>–</b>             | <b>0,0</b>                                                         | <b>–</b>          | <b>0,2</b>                                              | <b>–</b>                                                                        | <b>–</b>                                                 | <b>0,2</b>     |
| Veränderung PBO im Jahr 2010                                    | 115,1                                                     | 381,5                | 62,9                                                               | 501,2             | 13,3                                                    | 93,2                                                                            | –370,2                                                   | 797,0          |
| Veränderung Plan Assets im Jahr 2010                            | 10,1                                                      | 266,6                | 78,7                                                               | 500,7             | 11,8                                                    | 29,2                                                                            | 38,3                                                     | 935,4          |
| PBO per 31.12.2010                                              | 1.073,2                                                   | 1.284,3              | 62,9                                                               | 4.127,4           | 46,7                                                    | 621,4                                                                           | 111,0                                                    | 7.326,9        |
| ./. Verkehrswert Plan Assets per 31.12.2010                     | 52,6                                                      | 921,7                | 78,7                                                               | 3.374,9           | 45,0                                                    | 717,2                                                                           | 183,8                                                    | 5.373,9        |
| <b>Rückstellung per 31.12.2010</b>                              | <b>1.020,6</b>                                            | <b>362,6</b>         | <b>–15,8</b>                                                       | <b>752,5</b>      | <b>1,7</b>                                              | <b>–95,8</b>                                                                    | <b>–72,8</b>                                             | <b>1.953,0</b> |

Die folgende Übersicht zeigt den jährlichen Rentenanspruch, den die Vorstandsmitglieder bei Erreichen des Pensionierungsalters von 60 Jahren auf Basis der bis zum 31. Dezember 2010 erworbenen Ansprüche aus den beitragsorientierten und den leistungsorientierten Versorgungssystemen der SAP erhalten würden:

| Tsd. €                                                          | Stand per<br>31.12.2010 | Stand per<br>31.12.2009 |
|-----------------------------------------------------------------|-------------------------|-------------------------|
| Bill McDermott (Vorstandssprecher ab 7.2.2010) <sup>1)</sup>    | 101,1                   | 124,2                   |
| Dr. Werner Brandt                                               | 72,9                    | 54,1                    |
| Dr. Angelika Dammann<br>(Vorstandsmitglied ab 1.7.2010)         | 3,5                     | –                       |
| Gerhard Oswald                                                  | 228,1                   | 208,4                   |
| Vishal Sikka (Vorstandsmitglied ab 7.2.2010) <sup>1)</sup>      | 6,3                     | –                       |
| Léo Apotheker<br>(Vorstandssprecher und -mitglied bis 7.2.2010) | 45,5                    | 45,5                    |
| Erwin Gunst (Vorstandsmitglied bis 31.1.2010)                   | 8,8                     | 34,4                    |

<sup>1)</sup> Die hier dargestellten Ansprüche von Vishal Sikka und Bill McDermott betreffen nur die Ansprüche aus dem Pensionsplan der SAP America, Inc.

Für diese Ansprüche besteht eine sofortige vertragliche Unverfallbarkeit. Die tatsächlichen Renten mit 60 Jahren werden bei Fortdauer der Vorstandstätigkeit insbesondere durch künftige Finanzierungsbeiträge höher ausfallen als in der Übersicht dargestellt.

#### Nachvertragliches Wettbewerbsverbot

Für die Dauer des nachvertraglichen Wettbewerbsverbots von zwölf Monaten erhält das jeweilige Vorstandsmitglied eine Entschädigung in Höhe von 50 % seiner zuletzt bezogenen durchschnittlichen vertragsgemäßen Leistungen.

Die folgende Tabelle zeigt die Nettobarwerte der für das nachvertragliche Wettbewerbsverbot gezahlten Entschädigungen. Es handelt sich hierbei um die abgezinsten Barwerte der Beträge, die in dem angenommenen Fall gezahlt würden, dass Vorstandsmitglieder das Unternehmen zum regulären Ende ihrer jeweiligen aktuellen Vertragslaufzeit verlassen und dass die durchschnittlichen vertragsgemäßen Leistungen, die sie unmittelbar vor dem Firmenaustritt beziehen, gleich hoch sind wie die im Jahr 2010 bezogene Vergütung. Es ist

davon auszugehen, dass die tatsächlichen Entschädigungen für das nachvertragliche Wettbewerbsverbot von den hier dargestellten Beträgen abweichen werden. Dies hängt vom genauen Zeitpunkt des Firmenaustritts sowie von der Vergütungshöhe und der Zielerreichung zu diesem Zeitpunkt ab.

| Tsd. €                                                  | Vertragslaufzeit | Nettobarwert<br>der Wettbewerbs-<br>verbots-<br>entschädigung |
|---------------------------------------------------------|------------------|---------------------------------------------------------------|
| Bill McDermott<br>(Vorstandssprecher ab 7.2.2010)       | 30.6.2012        | 4.313,0                                                       |
| Jim Hagemann Snabe<br>(Vorstandssprecher ab 7.2.2010)   | 30.6.2012        | 3.767,8                                                       |
| Dr. Werner Brandt                                       | 31.12.2013       | 2.116,3                                                       |
| Dr. Angelika Dammann<br>(Vorstandsmitglied ab 1.7.2010) | 30.6.2013        | 1.174,8                                                       |
| Gerhard Oswald                                          | 31.12.2011       | 2.335,4                                                       |
| Vishal Sikka<br>(Vorstandsmitglied ab 7.2.2010)         | 31.12.2012       | 2.357,6                                                       |
| <b>Summe</b>                                            |                  | <b>16.064,9</b>                                               |

## Zusagen an den Vorstand für den Fall der vorzeitigen Tätigkeitsbeendigung

### Abfindungen

Die seit dem 1. Januar 2006 für alle Vorstandsmitglieder einheitlichen Verträge sehen vor, dass die SAP AG im Fall der vorzeitigen Beendigung des jeweiligen Vorstandsvertrags (zum Beispiel durch Widerruf der Bestellung, Eintritt einer Berufsunfähigkeit oder Change of Control) eine Abfindung in Höhe des noch ausstehenden, angemessen abgezinsten Zielgehalts für die gesamte Restlaufzeit des Vertrags zahlt. Der Abfindungsanspruch besteht nicht, sofern das Vorstandsmitglied das Ausscheiden aus den Diensten der SAP zu vertreten hat.

Bei Erlöschen oder Entfallen des Amtes des Vorstandsmitglieds als Vorstand aufgrund oder infolge einer Umwandlungs- und/oder Umstrukturierungsmaßnahme oder im Fall eines Change of Control haben die SAP AG und jedes Vorstandsmitglied innerhalb einer Frist von acht Wochen nach Eintreten des Ereignisses das Recht, den Anstellungsvertrag mit einer Frist

von sechs Monaten zu kündigen. Ein Change of Control liegt vor bei Entstehen einer Übernahmeverpflichtung nach dem Wertpapiererwerbs- und Übernahmegesetz (WpÜG) gegenüber den Aktionären der SAP AG, bei einer Verschmelzung der SAP AG mit einem anderen Unternehmen, bei der die SAP AG der untergehende Rechtsträger ist, oder bei Abschluss eines Beherrschungs- und/oder Gewinnabführungsvertrags mit der SAP AG als abhängigem Unternehmen. Ein weiterer Grund für die vorzeitige Beendigung des Vertrags ist der Widerruf der Bestellung des Vorstandsmitglieds als Vorstand der SAP AG im Zusammenhang mit einem Change of Control.

### Nachvertragliches Wettbewerbsverbot

Die oben erläuterten Leistungen für das nachvertragliche Wettbewerbsverbot gelten auch im Fall der vorzeitigen Beendigung der Vorstandstätigkeit.

### Dauerhafte Erwerbsunfähigkeit

Im Fall einer dauerhaften Erwerbsunfähigkeit endet der Vertrag zum Ende des Quartals, in dem die dauerhafte Erwerbsunfähigkeit festgestellt wurde. Das Vorstandsmitglied erhält das Monatsgrundgehalt für weitere zwölf Monate ab dem Tag, an dem die dauerhafte Erwerbsunfähigkeit festgestellt wurde.

## Leistungen an im Berichtsjahr ausgeschiedene Vorstandsmitglieder

Am 7. Februar 2010 trat Léo Apotheker als Vorstandssprecher zurück und legte sein Vorstandsmandat im Einvernehmen mit dem Aufsichtsrat mit sofortiger Wirkung nieder. Im Zusammenhang mit seinem Ausscheiden mit Wirkung vom 31. März 2010 erhielt er folgende Leistungen:

- Für die Dauer des Bestehens des nachvertraglichen Wettbewerbsverbots von zwölf Monaten erhielt Léo Apotheker eine Entschädigung in Höhe von monatlich 183,3 Tsd. €, was 50 % seiner zuletzt bezogenen durchschnittlichen vertragsgemäßen Leistungen entspricht. Da Léo Apotheker inzwischen ein neues Beschäftigungsverhältnis eingegangen ist, wurde die Entschädigungszahlung am 31. Oktober 2010 eingestellt.
- Für die vorzeitige Beendigung des Vertrags erhielt Léo Apotheker entsprechend den vertraglichen Vereinbarungen zur vorzeitigen Beendigung eine Abfindung in Höhe von 3.168,5 Tsd. €.
- Zur Beendigung des Anstellungsverhältnisses erhielt Léo Apotheker eine Urlaubsabgeltung für nicht genommenen Urlaub in Höhe von 459,5 Tsd. €.

---

Der Vorstandsvertrag mit Erwin Gunst wurde zum 31. März 2010 aus gesundheitlichen Gründen aufgelöst. Er erhielt im Zusammenhang mit seinem Ausscheiden im Berichtsjahr folgende Leistungen:

- Entsprechend den Vereinbarungen zur vorzeitigen Beendigung des Vertrags aus gesundheitlichen Gründen erhielt Erwin Gunst eine Zahlung von 2.036,0 Tsd. €.
- Die Vereinbarung zum nachvertraglichen Wettbewerbsverbot wurde ohne Zahlung seitens der SAP aufgehoben.

Am 11. Februar 2010 legte John Schwarz sein Vorstandsmandat im Einvernehmen mit dem Aufsichtsrat mit sofortiger Wirkung nieder. Im Zusammenhang mit seinem Ausscheiden mit Wirkung vom 31. März 2010 erhielt er folgende Leistungen:

- Die Vereinbarung zum nachvertraglichen Wettbewerbsverbot wurde im Februar 2010 aufgehoben. Diese Vereinbarung unterlag einer sechsmonatigen Kündigungsfrist. Da er Ende März 2010 aus dem Unternehmen ausschied, erhielt John Schwarz für die verbleibende Dauer des nachvertraglichen Wettbewerbsverbots von fünf Monaten eine Entschädigung in Höhe von monatlich 141,9 Tsd. €, was 50 % seiner zuletzt bezogenen durchschnittlichen vertragsgemäßen Leistungen entspricht.
- Für die vorzeitige Beendigung des Vertrags erhielt John Schwarz entsprechend den vertraglichen Vereinbarungen zur vorzeitigen Beendigung eine Abfindung in Höhe von 2.934,5 Tsd. €.
- Zur Beendigung des Anstellungsverhältnisses erhielt John Schwarz eine Urlaubsabgeltung für nicht genommenen Urlaub in Höhe von 70,5 Tsd. €.
- Die oben genannten in US-Dollar zahlbaren Eurobeträge wurden gemäß der Währungssicherungsklausel im Arbeitsvertrag vom 30. Juni 2009 zum Fixkurs von 1 € = 1,55664 US\$ umgerechnet.

Mit allen drei ausgeschiedenen Vorstandsmitgliedern wurde zudem vereinbart, dass die ihnen zugeteilten Rechte aus den Optionsprogrammen SAP SOP 2007 und SOP Performance Plan 2009 abweichend von den Planbedingungen trotz ihres Ausscheidens unbeschränkt bis zu deren Verfall (jeweils fünf Jahre vom Zeitpunkt der Gewährung) ausgeübt werden können.

### **Leistungen an in Vorjahren ausgeschiedene Vorstandsmitglieder**

An vor dem 1. Januar 2010 ausgeschiedene Vorstandsmitglieder erfolgten im Geschäftsjahr 2010 Pensionszahlungen in Höhe von 1.290 Tsd. € (2009: 764 Tsd. €). Zum Jahresende bestanden für ausgeschiedene Vorstandsmitglieder dynamische Pensionsverpflichtungen in Höhe von 24.878 Tsd. € (2009: 15.777 Tsd. €). Zur Bedienung dieser Verpflichtungen kann die SAP auf ein Planvermögen von 25.120 Tsd. € (2009: 16.512 Tsd. €) zurückgreifen.

### **Vom Vorstand gehaltene Vergütungskomponenten mit langfristiger Anreizwirkung**

Die Mitglieder des Vorstands halten virtuelle Aktienoptionen aus dem SAP SOP 2010, SOP Performance Plan 2009, SAP SOP 2007, Wertsteigerungsrechte aus dem Incentive Plan 2010, Aktienoptionen aus dem SAP SOP 2002 sowie Aktienoptionen und Wandelschuldverschreibungen aus dem LTI-Plan 2000, die ihnen in den Vorjahren zugeteilt wurden. Detaillierte Angaben zu Struktur und Maßgaben dieses Plans finden sich unter Textziffer (28) im Anhang zum Konzernabschluss.

### **SAP SOP 2010**

Die nachstehende Tabelle zeigt die virtuellen Aktienoptionen aus Zuteilungen im Rahmen des SAP SOP 2010 seit Auflage des Programms, die die Vorstandsmitglieder zum 31. Dezember 2010 hielten. Der Ausübungspreis für eine Option entspricht 115 % des Basispreises. Die zugeteilten Optionen haben eine Laufzeit von sieben Jahren und können erstmals nach einer vierjährigen Sperrfrist zu festgelegten Terminen ausgeübt werden. Die Optionen, die im Jahr 2010 begeben wurden, wären damit erstmals ab September 2014 ausübbar.

## Aktienoptionen aus dem SAP SOP 2010:

|                                                         | Zuteilungsjahr | Ausübungspreise je Option | Zuteilung am 9.9.2010 |                        | Ausgeübte Rechte 2010 | Kurs am Ausübungstag | Ausüb bare Rechte aus geschiedener Vorstandsmitglieder | Verfallene Rechte | Bestand am 31.12.2010 |                        |
|---------------------------------------------------------|----------------|---------------------------|-----------------------|------------------------|-----------------------|----------------------|--------------------------------------------------------|-------------------|-----------------------|------------------------|
|                                                         |                | €                         | Anzahl Optionen       | Restlaufzeit in Jahren | Anzahl Optionen       | €                    | Anzahl Optionen                                        | Anzahl Optionen   | Anzahl Optionen       | Restlaufzeit in Jahren |
| Bill McDermott<br>(Vorstandssprecher ab 7.2.2010)       | 2010           | 40,80                     | 135.714               | 7,00                   | –                     | –                    | –                                                      | –                 | 135.714               | 6,69                   |
| Jim Hagemann Snabe<br>(Vorstandssprecher ab 7.2.2010)   | 2010           | 40,80                     | 135.714               | 7,00                   | –                     | –                    | –                                                      | –                 | 135.714               | 6,69                   |
| Dr. Werner Brandt                                       | 2010           | 40,80                     | 82.428                | 7,00                   | –                     | –                    | –                                                      | –                 | 82.428                | 6,69                   |
| Dr. Angelika Dammann<br>(Vorstandsmitglied ab 1.7.2010) | 2010           | 40,80                     | 41.214                | 7,00                   | –                     | –                    | –                                                      | –                 | 41.214                | 6,69                   |
| Gerhard Oswald                                          | 2010           | 40,80                     | 82.428                | 7,00                   | –                     | –                    | –                                                      | –                 | 82.428                | 6,69                   |
| Vishal Sikka<br>(Vorstandsmitglied ab 7.2.2010)         | 2010           | 40,80                     | 82.428                | 7,00                   | –                     | –                    | –                                                      | –                 | 82.428                | 6,69                   |
| <b>Summe</b>                                            |                |                           | <b>559.926</b>        |                        |                       |                      |                                                        |                   | <b>559.926</b>        |                        |

### SOP Performance Plan 2009

Die nachstehende Tabelle zeigt die virtuellen Aktienoptionen aus Zuteilungen im Rahmen des SOP Performance Plan 2009, die die aktuellen Vorstandsmitglieder zum 31. Dezember 2010 hielten.

Die zugeteilten Optionen haben eine Laufzeit von fünf Jahren und können erstmals nach einer zweijährigen Sperrfrist zu festgelegten Terminen ausgeübt werden. Daher waren keine der gehaltenen Optionen am 31. Dezember 2010 ausübbar.

Der Ausübungspreis für eine Option richtet sich danach, inwieweit die Wertentwicklung der SAP-Aktie die Wertentwicklung des TechPGI Index übersteigt, und ist somit variabel. Der Bruttogewinn ist auf 30,80 € pro Option limitiert, was 110 % des Kurses der SAP-Aktie am Tag der Zuteilung entspricht.



## Aktienoptionen aus dem SOP Performance Plan 2009:

|                                                                            | Zuteilungsjahr | Ausübungspreise je Option | Bestand am 1.1.2010 |                        | Ausgeübte Rechte 2010 | Kurs am Ausübungstag | Ausübbares Rechte ausgederter Vorstandsmitglieder | Verfallene Rechte | Bestand am 31.12.2010 |                        |
|----------------------------------------------------------------------------|----------------|---------------------------|---------------------|------------------------|-----------------------|----------------------|---------------------------------------------------|-------------------|-----------------------|------------------------|
|                                                                            |                | €                         | Anzahl Optionen     | Restlaufzeit in Jahren | Anzahl Optionen       | €                    | Anzahl Optionen                                   | Anzahl Optionen   | Anzahl Optionen       | Restlaufzeit in Jahren |
| Bill McDermott (Vorstandssprecher ab 7.2.2010)                             | 2009           | variabel                  | 102.670             | 4,35                   | –                     | –                    | –                                                 | –                 | 102.670               | 3,35                   |
| Jim Hagemann Snabe (Vorstandssprecher ab 7.2.2010)                         | 2009           | variabel                  | 102.670             | 4,35                   | –                     | –                    | –                                                 | –                 | 102.670               | 3,35                   |
| Dr. Werner Brandt                                                          | 2009           | variabel                  | 102.670             | 4,35                   | –                     | –                    | –                                                 | –                 | 102.670               | 3,35                   |
| Gerhard Oswald                                                             | 2009           | variabel                  | 102.670             | 4,35                   | –                     | –                    | –                                                 | –                 | 102.670               | 3,35                   |
| Vishal Sikka (Vorstandsmitglied ab 7.2.2010) <sup>1)</sup>                 | 2009           | variabel                  | 35.588              | 4,35                   | –                     | –                    | –                                                 | –                 | 35.588                | 3,35                   |
| Léo Apotheker (Vorstandssprecher und -mitglied bis 7.2.2010) <sup>2)</sup> | 2009           | variabel                  | 169.040             | 4,35                   | –                     | –                    | –169.040                                          | –                 | –                     | 3,35                   |
| John Schwarz (Vorstandsmitglied bis 11.2.2010) <sup>3)</sup>               | 2009           | variabel                  | 102.670             | 4,35                   | –                     | –                    | –102.670                                          | –                 | –                     | 3,35                   |
| <b>Summe</b>                                                               |                |                           | <b>717.978</b>      |                        |                       |                      | <b>–271.710</b>                                   |                   | <b>446.268</b>        |                        |

<sup>1)</sup> Die genannten Bestände wurden vor der Zugehörigkeit zum Vorstand zugeteilt.

<sup>2)</sup> Die Amtszeit von Léo Apotheker als Vorstandssprecher und -mitglied endete am 7. Februar 2010. Sein Vertrag mit der SAP AG endete am 31. März 2010.

<sup>3)</sup> Die Vorstandsmitgliedschaft von John Schwarz endete am 11. Februar 2010. Sein Vertrag mit der SAP AG endete am 31. März 2010.

## SAP SOP 2007

Die nachstehende Tabelle zeigt die virtuellen Aktienoptionen aus Zuteilungen im Rahmen des SAP SOP 2007 seit Auflage des Programms, die die Vorstandsmitglieder zum 31. Dezember 2010 hielten, unabhängig davon, ob die entsprechenden Zuteilungen vor oder während der Mitgliedschaft im Vorstand erfolgten.

Der Ausübungspreis für eine Option entspricht 110 % des Basispreises. Die zugeteilten Optionen haben eine Laufzeit von fünf Jahren und können erstmals nach einer zweijährigen Sperrfrist zu festgelegten Terminen ausgeübt werden. Die Optionen, die im Jahr 2007 begeben wurden, waren nach Ablauf einer zweijährigen Sperrfrist erstmals ab Juni 2009 ausübbar. Die Optionen, die im Jahr 2008 begeben wurden, waren nach Ablauf einer zweijährigen Sperrfrist erstmals ab März 2010 ausübbar.

## Aktienoptionen aus dem SAP SOP 2007:

|                                                                            | Zuteilungsjahr | Ausübungspreise je Option | Bestand am 1.1.2010 |                        | Ausgeübte Rechte 2010 | Kurs am Ausübungstag | Ausübbare Rechte ausgederter Vorstandsmitglieder | Verfallene Rechte | Bestand am 31.12.2010 |                        |
|----------------------------------------------------------------------------|----------------|---------------------------|---------------------|------------------------|-----------------------|----------------------|--------------------------------------------------|-------------------|-----------------------|------------------------|
|                                                                            |                | €                         | Anzahl Optionen     | Restlaufzeit in Jahren | Anzahl Optionen       | €                    | Anzahl Optionen                                  | Anzahl Optionen   | Anzahl Optionen       | Restlaufzeit in Jahren |
| Bill McDermott (Vorstandssprecher ab 7.2.2010) <sup>1)</sup>               | 2007           | 39,28                     | 62.508              | 2,23                   | –                     | –                    | –                                                | –                 | 62.508                | 1,23                   |
|                                                                            | 2008           | 35,96                     | 70.284              | 3,18                   | –                     | –                    | –                                                | –                 | 70.284                | 2,18                   |
| Jim Hagemann Snabe (Vorstandssprecher ab 7.2.2010) <sup>1)</sup>           | 2007           | 39,28                     | 37.505              | 2,23                   | –                     | –                    | –                                                | –                 | 37.505                | 1,23                   |
|                                                                            | 2008           | 35,96                     | 56.228              | 3,18                   | –                     | –                    | –                                                | –                 | 56.228                | 2,18                   |
| Dr. Werner Brandt                                                          | 2007           | 39,28                     | 72.216              | 2,23                   | –                     | –                    | –                                                | –                 | 72.216                | 1,23                   |
|                                                                            | 2008           | 35,96                     | 81.200              | 3,18                   | –                     | –                    | –                                                | –                 | 81.200                | 2,18                   |
| Gerhard Oswald                                                             | 2007           | 39,28                     | 72.216              | 2,23                   | –                     | –                    | –                                                | –                 | 72.216                | 1,23                   |
|                                                                            | 2008           | 35,96                     | 81.200              | 3,18                   | –                     | –                    | –                                                | –                 | 81.200                | 2,18                   |
| Vishal Sikka (Vorstandsmitglied ab 7.2.2010) <sup>1)</sup>                 | 2007           | 39,28                     | 12.502              | 2,23                   | –                     | –                    | –                                                | –                 | 12.502                | 1,23                   |
|                                                                            | 2008           | 35,96                     | 17.571              | 3,18                   | –                     | –                    | –                                                | –                 | 17.571                | 2,18                   |
| Léo Apotheker (Vorstandssprecher und -mitglied bis 7.2.2010) <sup>2)</sup> | 2007           | 39,28                     | 79.093              | 2,23                   | –                     | –                    | –79.093                                          | –                 | –                     | 1,23                   |
|                                                                            | 2008           | 35,96                     | 88.933              | 3,18                   | –                     | –                    | –88.933                                          | –                 | –                     | 2,18                   |
| Erwin Gunst (Vorstandsmitglied bis 31.1.2010) <sup>3)</sup>                | 2007           | 39,28                     | 56.258              | 2,23                   | –                     | –                    | –56.258                                          | –                 | –                     | 1,23                   |
|                                                                            | 2008           | 35,96                     | 70.284              | 3,18                   | –                     | –                    | –70.284                                          | –                 | –                     | 2,18                   |
| John Schwarz (Vorstandsmitglied bis 11.2.2010) <sup>4)</sup>               | 2008           | 35,96                     | 81.200              | 3,18                   | –                     | –                    | –81.200                                          | –                 | –                     | 2,18                   |
| <b>Summe</b>                                                               |                |                           | <b>939.198</b>      |                        |                       |                      | <b>–375.768</b>                                  |                   | <b>563.430</b>        |                        |

<sup>1)</sup> Die genannten Bestände wurden vor der Zugehörigkeit zum Vorstand zugeteilt.

<sup>2)</sup> Die Amtszeit von Léo Apotheker als Vorstandssprecher und -mitglied endete am 7. Februar 2010. Sein Vertrag mit der SAP AG endete am 31. März 2010.

<sup>3)</sup> Die Vorstandsmitgliedschaft von Erwin Gunst endete am 31. Januar 2010. Sein Vertrag mit der SAP AG endete am 31. März 2010.

<sup>4)</sup> Die Vorstandsmitgliedschaft von John Schwarz endete am 11. Februar 2010. Sein Vertrag mit der SAP AG endete am 31. März 2010.

---

### **Incentive Plan 2010**

Die im Geschäftsjahr 2006 einmalig zusätzlich gewährte aktienbasierte Vergütung besteht aus Wertsteigerungsrechten im Rahmen des aktienbasierten Vergütungsprogramms Incentive Plan 2010. Die dem Vorstand aus diesem Programm zugeteilten Wertsteigerungsrechte sind am 31. Dezember 2010 ohne Auszahlung verfallen.

### **SAP SOP 2002**

Die nachstehende Tabelle zeigt die Aktienoptionen aus Zuteilungen in den Vorjahren im Rahmen des SAP SOP 2002 seit Auflage des Programms, die die Vorstandsmitglieder zum 31. Dezember 2010 hielten.

Der Ausübungspreis für Aktienoptionen im Rahmen des SAP SOP 2002 entspricht 110 % des Basispreises für eine Stammaktie der SAP AG. Basispreis ist der durchschnittliche Börsenkurs der SAP-Aktie an der Frankfurter Wertpapierbörse an den letzten fünf Börsentagen vor Ausgabe der jeweiligen Aktienoption, ermittelt auf der Basis des arithmetischen Mittels der Schlussauktionspreise der SAP-Aktie im Xetra-Handel (oder Nachfolgesystem). Ausübungspreis ist aber mindestens der Schlussauktionspreis am Tag vor der Ausgabe der jeweiligen Aktienoption. Die zugeteilten Optionen haben eine Laufzeit von fünf Jahren und können erstmals nach einer zweijährigen Sperrfrist zu festgelegten Terminen ausgeübt werden.

Infolge der am 21. Dezember 2006 umgesetzten Kapitalerhöhung aus Gesellschaftsmitteln und der damit verbundenen Ausgabe von Gratisaktien im Verhältnis eins zu drei berechtigt jede Aktienoption nunmehr zum Bezug von vier Aktien. Aus Gründen der besseren Vergleichbarkeit mit dem Kursniveau der SAP-Aktie nach Umsetzung der Kapitalerhöhung wird in der folgenden Übersicht nicht die Zahl der Aktienoptionen, sondern die Zahl der Aktien angegeben, zu deren Bezug die Aktienoptionen berechtigen. Die angegebenen Ausübungspreise sind dementsprechend je Aktie und nicht je Option angegeben. Die Zahl der Aktienoptionen entspricht einem Viertel der angegebenen Aktienzahl, die Ausübungspreise je Aktienoption entsprechen dem Vierfachen der angegebenen Ausübungspreise je Aktie.

Im Dezember 2009 beschloss der Aufsichtsrat eine Änderung der Planbedingungen für den SAP SOP 2002 (Tranche 2005). Detaillierte Angaben zu dieser Änderung finden sich unter Textziffer (28) im Anhang zum Konzernabschluss.

Die Rechte aus der Tranche 2005 sind im Februar 2010 verfallen.

## Aktienoptionen aus dem SAP SOP 2002:

|                                                                            | Zuteilungsjahr | Ausübungspreise je Aktie | Bestand am 1.1.2010 |                        | Ausgeübte Rechte 2010 | Kurs am Ausübungstag | Ausübbares Rechte ausgederter Vorstandsmitglieder | Verfallene Rechte | Bestand am 31.12.2010 |                        |
|----------------------------------------------------------------------------|----------------|--------------------------|---------------------|------------------------|-----------------------|----------------------|---------------------------------------------------|-------------------|-----------------------|------------------------|
|                                                                            |                | €                        | Anzahl Aktien       | Restlaufzeit in Jahren | Anzahl Aktien         | €                    | Anzahl Aktien                                     | Anzahl Aktien     | Anzahl Aktien         | Restlaufzeit in Jahren |
| Bill McDermott (Vorstandssprecher ab 7.2.2010) <sup>1)</sup>               | 2006           | 46,48                    | 77.296              | 1,10                   | –                     | –                    | –                                                 | –                 | 77.296                | 0,10                   |
| Jim Hagemann Snabe (Vorstandssprecher ab 7.2.2010) <sup>1)</sup>           | 2005           | 33,55                    | 51.180              | 0,11                   | –22.008               | 33,67                | –                                                 | –29.172           | –                     | 0,00                   |
|                                                                            | 2006           | 46,48                    | 37.164              | 1,10                   | –                     | –                    | –                                                 | –                 | 37.164                | 0,10                   |
| Dr. Werner Brandt                                                          | 2005           | 33,55                    | 149.980             | 0,11                   | –64.496               | 33,67                | –                                                 | –85.484           | –                     | 0,00                   |
|                                                                            | 2006           | 46,48                    | 87.292              | 1,10                   | –                     | –                    | –                                                 | –                 | 87.292                | 0,10                   |
| Gerhard Oswald                                                             | 2005           | 33,55                    | 149.980             | 0,11                   | –64.496               | 33,67                | –                                                 | –85.484           | –                     | 0,00                   |
|                                                                            | 2006           | 46,48                    | 87.292              | 1,10                   | –                     | –                    | –                                                 | –                 | 87.292                | 0,10                   |
| Vishal Sikka (Vorstandsmitglied ab 7.2.2010) <sup>1)</sup>                 | 2006           | 46,48                    | 7.436               | 1,10                   | –                     | –                    | –                                                 | –                 | 7.436                 | 0,10                   |
| Léo Apotheker (Vorstandssprecher und -mitglied bis 7.2.2010) <sup>2)</sup> | 2005           | 33,55                    | 149.980             | 0,11                   | –64.496               | 33,67                | –                                                 | –85.484           | –                     | 0,00                   |
|                                                                            | 2006           | 46,48                    | 95.604              | 1,10                   | –                     | –                    | –95.604                                           | –                 | –                     | 0,10                   |
| Erwin Gunst (Vorstandsmitglied bis 31.1.2010) <sup>3)</sup>                | 2005           | 33,55                    | 61.264              | 0,11                   | –26.344               | 33,67                | –                                                 | –34.920           | –                     | 0,00                   |
|                                                                            | 2006           | 46,48                    | 44.596              | 1,10                   | –                     | –                    | –44.596                                           | –                 | –                     | 0,10                   |
| <b>Summe</b>                                                               |                |                          | <b>999.064</b>      |                        | <b>–241.840</b>       |                      | <b>–140.200</b>                                   | <b>–320.544</b>   | <b>296.480</b>        |                        |

<sup>1)</sup> Die genannten Bestände wurden vor der Zugehörigkeit zum Vorstand zugeteilt.

<sup>2)</sup> Die Amtszeit von Léo Apotheker als Vorstandssprecher und -mitglied endete am 7. Februar 2010. Sein Vertrag mit der SAP AG endete am 31. März 2010.

<sup>3)</sup> Die Vorstandsmitgliedschaft von Erwin Gunst endete am 31. Januar 2010. Sein Vertrag mit der SAP AG endete am 31. März 2010.

### LTI-Plan 2000

Der LTI-Plan 2000 räumt den Berechtigten ein Recht zur Wahl zwischen Wandelschuldverschreibungen und Aktienoptionen ein. Der wesentliche Unterschied besteht in der Bestimmung des Ausübungs- oder Wandlungspreises. Während der Wandlungspreis für die Wandelschuldverschreibungen dem Schlusskurs der SAP-Aktie vor dem Ausgabetag entspricht, richtet sich der Ausübungspreis für die Aktienoptionen danach, inwieweit die Wertentwicklung der SAP-Aktie die Wertentwicklung des S&P North Software-Software Index™ (früher GSTI Software Index) übersteigt, und ist somit variabel. Die zugeteilten Optionen haben eine Laufzeit von zehn Jahren und konnten erstmals nach einer zwei-, drei- und vierjährigen Sperrfrist zu je einem Drittel zu festgelegten Terminen ausgeübt werden. Zum 31. Dezember 2010 hielt kein aktuelles Mitglied des Vorstands Aktienoptionen aus dem LTI-Plan 2000.

Die nachstehende Tabelle zeigt die Wandelschuldverschreibungen aus Zuteilungen aus Vorjahren im Rahmen des LTI-Plans 2000, die die Vorstandsmitglieder zum 31. Dezember 2010 hielten. Die Ausübungspreise für Wandelschuldverschreibungen aus dem LTI-Plan 2000 bezeichnen die Preise, die bei Wandlung der Schuldverschreibung vom Vorstandsmitglied zu

bezahlen wären. Die Ausübungspreise sind fix und entsprechen dem Aktienkurs der SAP-Aktie am letzten Börsentag vor Ausgabe der Wandelschuldverschreibungen. Infolge der am 21. Dezember 2006 umgesetzten Kapitalerhöhung aus Gesellschaftsmitteln und der damit verbundenen Ausgabe von Gratisaktien im Verhältnis eins zu drei berechtigt jede Wandelschuldverschreibung nunmehr zum Bezug von vier Aktien. Aus Gründen der besseren Vergleichbarkeit mit dem Kursniveau der SAP-Aktie nach Umsetzung der Kapitalerhöhung wird in der folgenden Übersicht nicht die Zahl der Wandelschuldverschreibungen, sondern die Zahl der Aktien angegeben, zu deren Bezug die Wandelschuldverschreibungen berechtigen. Die angegebenen Ausübungspreise sind dementsprechend je Aktie und nicht je Wandelschuldverschreibung angegeben. Die Zahl der Wandelschuldverschreibungen entspricht einem Viertel der angegebenen Aktienzahl, die Ausübungspreise je Wandelschuldverschreibung entsprechen dem Vierfachen der angegebenen Ausübungspreise je Aktie.

Die Rechte zur Ausübung von Wandelschuldverschreibungen aus der Tranche 2000 sind im Februar 2010 verfallen.

Wandelschuldverschreibungen aus dem LTI-Plan 2000:

|                                                                               | Zuteilungsjahr | Ausübungspreise je Aktie | Bestand am 1.1.2010 |               | Ausgeübte Rechte 2010  | Kurs am Ausübungstag | Ausübbarer Rechte ausgederter Vorstandsmitglieder | Verfallene Rechte | Bestand am 31.12.2010 |                        |
|-------------------------------------------------------------------------------|----------------|--------------------------|---------------------|---------------|------------------------|----------------------|---------------------------------------------------|-------------------|-----------------------|------------------------|
|                                                                               |                |                          | €                   | Anzahl Aktien | Restlaufzeit in Jahren | €                    | Anzahl Aktien                                     | Anzahl Aktien     | Anzahl Aktien         | Restlaufzeit in Jahren |
| Dr. Werner Brandt                                                             | 2001           | 47,81                    | 20.000              | 1,14          | –                      | –                    | –                                                 | –                 | 20.000                | 0,14                   |
|                                                                               | 2002           | 37,88                    | 120.000             | 2,14          | –                      | –                    | –                                                 | –                 | 120.000               | 1,14                   |
| Gerhard Oswald                                                                | 2000           | 72,58                    | 65.700              | 0,14          | –                      | –                    | –                                                 | –65.700           | –                     | 0                      |
|                                                                               | 2001           | 47,81                    | 88.000              | 1,14          | –                      | –                    | –                                                 | –                 | 88.000                | 0,14                   |
| Léo Apotheker<br>(Vorstandssprecher und -mitglied bis 7.2.2010) <sup>1)</sup> | 2001           | 47,81                    | 120.000             | 1,14          | –                      | –                    | –120.000                                          | –                 | –                     | 0,14                   |
|                                                                               | 2002           | 37,88                    | 70.000              | 2,14          | –                      | –                    | –70.000                                           | –                 | –                     | 1,14                   |
| <b>Summe</b>                                                                  |                |                          | <b>483.700</b>      |               |                        |                      | <b>–190.000</b>                                   | <b>–65.700</b>    | <b>228.000</b>        |                        |

<sup>1)</sup> Die Amtszeit von Léo Apotheker als Vorstandssprecher und -mitglied endete am 7. Februar 2010. Sein Vertrag mit der SAP AG endete am 31. März 2010.



### Gesamtaufwand für aktienbasierte Vergütungen

Im Berichtsjahr und im Vorjahr wurde folgender Aufwand für die von Mitgliedern des Vorstands gehaltenen aktienorientierten Vergütungsinstrumente erfasst:

| Tsd. €                                                                     | 2010           | 2009           |
|----------------------------------------------------------------------------|----------------|----------------|
| Bill McDermott<br>(Vorstandssprecher ab 7.2.2010)                          | 382,9          | 339,3          |
| Jim Hagemann Snabe<br>(Vorstandssprecher ab 7.2.2010)                      | 373,8          | 318,3          |
| Dr. Werner Brandt                                                          | 355,2          | 351,8          |
| Dr. Angelika Dammann<br>(Vorstandsmitglied ab 1.7.2010)                    | 28,1           | –              |
| Gerhard Oswald                                                             | 355,2          | 351,8          |
| Vishal Sikka (Vorstandsmitglied ab 7.2.2010)                               | 151,8          | –              |
| Léo Apotheker (Vorstandssprecher und -mitglied bis 7.2.2010) <sup>1)</sup> | 575,0          | 376,3          |
| Erwin Gunst (Vorstandsmitglied bis 31.1.2010) <sup>1)</sup>                | 371,7          | 343,1          |
| John Schwarz (Vorstandsmitglied bis 11.2.2010) <sup>1)</sup>               | 393,8          | 397,0          |
| <b>Summe</b>                                                               | <b>2.987,5</b> | <b>2.477,6</b> |

<sup>1)</sup> Der im Berichtsjahr erfasste Aufwand resultiert im Wesentlichen daraus, dass die Rechte bei Austritt nicht verfielen, sondern bis zum Auslaufen der Programme ausgeübt werden können. Nach den Regelungen von IFRS 2 sind die Zeitwerte sofort in voller Höhe aufwandswirksam zu erfassen.

### AKTIENBESITZ UND WERTPAPIERTRANSAKTIONEN DES VORSTANDS

Kein Mitglied des Vorstands hält mehr als 1 % am Grundkapital der SAP AG. Zum 31. Dezember 2010 hielten die Mitglieder des Vorstands insgesamt 13.747 SAP-Aktien (2009: 15.336 SAP-Aktien).

Der SAP sind im Geschäftsjahr 2010 folgende Wertpapiertransaktionen von Mitgliedern des Vorstands oder von bestimmten diesen nahestehenden Personen gemäß § 15a des Wertpapierhandelsgesetzes gemeldet worden.

Transaktionen mit SAP-Aktien:

|                                                              | Datum des Geschäfts | Transaktion                      | Anzahl | Preis je Stück in € |
|--------------------------------------------------------------|---------------------|----------------------------------|--------|---------------------|
| Jim Hagemann Snabe                                           | 1.2.2010            | Verkauf von Aktien <sup>1)</sup> | 22.008 | 33,6677             |
| Gerhard Oswald                                               | 1.2.2010            | Verkauf von Aktien <sup>1)</sup> | 64.496 | 33,6677             |
| Léo Apotheker (Vorstandssprecher und -mitglied bis 7.2.2010) | 1.2.2010            | Verkauf von Aktien <sup>1)</sup> | 64.496 | 33,6677             |
| Dr. Werner Brandt                                            | 1.2.2010            | Verkauf von Aktien <sup>1)</sup> | 64.496 | 33,6677             |
| Dr. Angelika Dammann (Vorstandsmitglied seit 1.7.2010)       | 23.8.2010           | Kauf von Aktien                  | 1.420  | 35,38               |

<sup>1)</sup> Verkauf von Aktien im Rahmen des SAP SOP 2002

---

## **SONSTIGE ANGABEN ZUM VORSTAND**

Im Geschäftsjahr 2010 sowie im Vorjahr gewährte SAP keine Vorschüsse auf künftige Gehaltszahlungen oder Kredite an Vorstandsmitglieder und ging keine Haftungsverhältnisse zugunsten dieser Personen ein.

Die Mitglieder von Organen der SAP AG sowie alle Organe der verbundenen Unternehmen im In- und Ausland werden von der SAP AG beziehungsweise den verbundenen Unternehmen von Ansprüchen Dritter im gesetzlich zulässigen Rahmen freigestellt. Zu diesem Zweck unterhält SAP eine Vermögensschaden-Haftpflicht-Gruppenversicherung für Organmitglieder und leitende Angestellte der SAP (D&O-Versicherung). Sie wird jeweils auf ein Jahr abgeschlossen und jährlich verlängert. Die Versicherung deckt das persönliche Haftungsrisiko für den Fall ab, dass der Personenkreis bei Ausübung seiner Führungstätigkeit für Vermögensschäden in Anspruch genommen wird. Gemäß § 93 Abs. 2 des Aktiengesetzes (AktG) sieht die bestehende D&O-Versicherung einen Selbstbehalt für Vorstandsmitglieder der SAP AG vor.

## **VERGÜTUNG DES AUFSICHTSRATS**

### **Vergütungsstruktur**

Die Vergütung des Aufsichtsrats der SAP ist in § 16 der Satzung der SAP AG geregelt. Durch Beschluss der SAP-Hauptversammlung vom 8. Juni 2010 wurde dieser Paragraph neu gefasst, um die Vergütung der Aufsichtsratsmitglieder an das Niveau sowie das Verhältnis von fester und variabler Vergütung in anderen vergleichbaren Unternehmen anzupassen. Die Aufsichtsratsmitglieder erhalten neben dem Ersatz ihrer Auslagen eine Vergütung, die aus einem festen und einem variablen Bestandteil besteht. Dabei ist die Höhe der variablen Vergütung von der ausgeschütteten Dividende abhängig.

Die feste Vergütung beträgt für den Vorsitzenden 100.000 €, für seinen Stellvertreter 70.000 € und für die übrigen Aufsichtsratsmitglieder 50.000 €. Für die Mitgliedschaft im Prüfungsausschuss erhalten die Aufsichtsratsmitglieder zusätzlich eine feste Vergütung von jährlich 15.000 € und für die Mitgliedschaft in einem anderen Ausschuss des Aufsichtsrats 10.000 €, soweit der jeweilige Ausschuss im Geschäftsjahr getagt hat; der Vorsitzende des Prüfungsausschusses erhält 25.000 € und der Vorsitzende eines anderen Ausschusses erhält 20.000 €. Die feste Vergütung ist nach Ablauf des Geschäftsjahres zahlbar.

Die variable Vergütung beträgt für das jeweilige Geschäftsjahr für den Vorsitzenden 10.000 €, für seinen Stellvertreter 8.000 € und für die übrigen Aufsichtsratsmitglieder 6.000 € für jede 0,01 € ausgeschüttete Dividende je Aktie, die 0,40 € Dividende je Aktie übersteigt. Die variable Vergütung ist zahlbar nach Ablauf der Hauptversammlung, die über die Dividende des betreffenden Geschäftsjahres beschließt.

Die Gesamtvergütung ohne Ausschussvergütung beträgt jedoch höchstens für den Vorsitzenden 250.000 €, für seinen Stellvertreter 200.000 € und für die übrigen Aufsichtsratsmitglieder 150.000 €.

Aufsichtsratsmitglieder, die nicht während des gesamten Geschäftsjahres im Amt waren, erhalten für jeden angefangenen Monat ihrer Tätigkeit ein Zwölftel der Vergütung. Entsprechendes gilt für die erhöhte Vergütung für den Vorsitzenden und den Stellvertreter sowie für die Vergütung für den Vorsitz und die Mitgliedschaft in einem Ausschuss.

## Vergütungshöhe

Vorbehaltlich der Beschlussfassung der Hauptversammlung am 25. Mai 2011 über die Dividendenausschüttung werden die Mitglieder des Aufsichtsrats für das Geschäftsjahr 2010 folgende Vergütungen erhalten:

| Tsd. €                                                  | 2010                         |                    |                                 |                | 2009                         |                    |                                 |                |
|---------------------------------------------------------|------------------------------|--------------------|---------------------------------|----------------|------------------------------|--------------------|---------------------------------|----------------|
|                                                         | Fester Vergütungsbestandteil | Ausschussvergütung | Variabler Vergütungsbestandteil | Gesamt         | Fester Vergütungsbestandteil | Ausschussvergütung | Variabler Vergütungsbestandteil | Gesamt         |
| Prof. Dr. h. c. mult. Hasso Plattner (Vorsitzender)     | 100,0                        | 60,0               | 150,0                           | 310,0          | 75,0                         | 20,0               | 125,0                           | 220,0          |
| Lars Lamadé (stellvertretender Vorsitzender)            | 70,0                         | 1,7                | 130,0                           | 201,7          | 50,0                         | 2,5                | 100,0                           | 152,5          |
| Pekka Ala-Pietilä                                       | 50,0                         | 20,0               | 100,0                           | 170,0          | 37,5                         | 5,0                | 62,5                            | 105,0          |
| Thomas Bamberger                                        | 50,0                         | 15,0               | 100,0                           | 165,0          | 37,5                         | 2,5                | 62,5                            | 102,5          |
| Panagiotis Bissiritsas                                  | 50,0                         | 20,0               | 100,0                           | 170,0          | 37,5                         | 5,0                | 62,5                            | 105,0          |
| Willi Burbach                                           | 50,0                         | 10,0               | 100,0                           | 160,0          | 37,5                         | 5,0                | 62,5                            | 105,0          |
| Prof. Dr. Wilhelm Haarmann                              | 50,0                         | 31,7               | 100,0                           | 181,7          | 37,5                         | 10,0               | 62,5                            | 110,0          |
| Peter Koop                                              | 50,0                         | 10,0               | 100,0                           | 160,0          | 37,5                         | 4,8                | 62,5                            | 104,8          |
| Christiane Kuntz-Mayr                                   | 50,0                         | 10,0               | 100,0                           | 160,0          | 37,5                         | 2,3                | 62,5                            | 102,3          |
| Bernard Liautaud                                        | 50,0                         | 10,0               | 100,0                           | 160,0          | 37,5                         | 2,5                | 62,5                            | 102,5          |
| Dr. Gerhard Maier                                       | 50,0                         | 25,0               | 100,0                           | 175,0          | 37,5                         | 5,0                | 62,5                            | 105,0          |
| Dr. h. c. Hartmut Mehdorn                               | 50,0                         | 10,0               | 100,0                           | 160,0          | 37,5                         | 2,5                | 62,5                            | 102,5          |
| Prof. Dr.-Ing. Dr. h. c. Dr.-Ing. E. h. Joachim Milberg | 50,0                         | 35,0               | 100,0                           | 185,0          | 37,5                         | 10,0               | 62,5                            | 110,0          |
| Dr. Erhard Schipporeit                                  | 50,0                         | 35,0               | 100,0                           | 185,0          | 37,5                         | 7,5                | 62,5                            | 107,5          |
| Stefan Schulz                                           | 50,0                         | 21,7               | 100,0                           | 171,7          | 37,5                         | 5,0                | 62,5                            | 105,0          |
| Prof. Dr.-Ing. Dr.-Ing. E. h. Klaus Wucherer            | 50,0                         | 10,0               | 100,0                           | 160,0          | 37,5                         | 2,5                | 62,5                            | 102,5          |
| <b>Summe</b>                                            | <b>870,0</b>                 | <b>325,0</b>       | <b>1.680,0</b>                  | <b>2.875,0</b> | <b>650,0</b>                 | <b>92,1</b>        | <b>1.100,0</b>                  | <b>1.842,1</b> |

Zusätzlich erstattet SAP den Mitgliedern des Aufsichtsrats die auf die Aufsichtsratsvergütung entfallende Umsatzsteuer und ihre Auslagen.

Die Gesamtvergütung, die die Mitglieder des Aufsichtsrats im Geschäftsjahr 2010 für Tätigkeiten bei der SAP außerhalb ihres Aufsichtsratsmandats erhielten, betrug 995,0 Tsd. € (2009: 1.095,1 Tsd. €). Diese Beträge beinhalten ausschließlich Vergütungen, die die Arbeitnehmervertreter der SAP in ihrer Funktion als Arbeitnehmer der SAP in den Geschäftsjahren 2009 und 2010 erhielten.

---

Das Aufsichtsratsmitglied Wilhelm Haarmann ist Rechtsanwalt und Gründungspartner der HAARMANN Partnerschaftsgesellschaft in Frankfurt am Main. Herr Haarmann und die HAARMANN Partnerschaftsgesellschaft beraten die SAP gelegentlich bei bestimmten Projekten sowie in Steuer- und Rechtsangelegenheiten. Die Entgelte für diese Leistungen betrugen im Geschäftsjahr 2010 insgesamt 73,0 Tsd. € (2009: 839,0 Tsd. €).

Im Zusammenhang mit einer SAP-Studie zum Potenzial von In-Memory-Datenbanktechnologie für Wirtschaftsführer nahmen wir Beratungsleistungen des Aufsichtsratsmitglieds Hartmut Mehdorn in Anspruch. Hierfür erhielt Herr Mehdorn im Geschäftsjahr 2010 ein Honorar von 29,0 Tsd. € (2009: keine zusätzlich zur Aufsichtsrats Tätigkeit erbrachten Beratungsleistungen).

#### **VOM AUFSICHTSRAT GEHALTENE VERGÜTUNGSKOMPONENTEN MIT LANGFRISTIGER ANREIZWIRKUNG**

Die Mitglieder des Aufsichtsrats erhalten für ihre Aufsichtsrats Tätigkeit keine Aktienoptionen und keine anderen aktienbasierten Vergütungen. Sofern Arbeitnehmervertreter im Aufsichtsrat Aktienoptionen oder andere aktienbasierte Vergütungen erhalten, resultieren diese Leistungen aus ihrer Stellung als Arbeitnehmer der SAP AG und sind von ihrer Aufsichtsrats Tätigkeit unabhängig.

#### **Aktienbesitz und Wertpapiertransaktionen des Aufsichtsrats**

Der Aufsichtsratsvorsitzende Hasso Plattner sowie die Gesellschaften, an denen er mehrheitlich beteiligt ist, hielten am 31. Dezember 2010 122.148.302 SAP-Aktien (31. Dezember 2009: 127.186.143 SAP-Aktien), was 9,956 % des Grundkapitals der SAP AG entspricht (2009: 10,374 %). Alle übrigen Mitglieder des Aufsichtsrats hielten sowohl zum Jahresende 2010 als auch zum Vorjahresende jeweils weniger als 1 % der Aktien der SAP AG. Insgesamt hielten die Mitglieder des Aufsichtsrats am 31. Dezember 2010 122.156.130 SAP-Aktien (31. Dezember 2009: 127.193.136 SAP-Aktien).

Der SAP sind im Geschäftsjahr 2010 folgende Wertpapiertransaktionen von Mitgliedern des Aufsichtsrats oder von bestimmten diesen nahestehenden Personen gemäß § 15a des Wertpapierhandelsgesetzes gemeldet worden.

#### Transaktionen mit SAP-Aktien:

|                                 | Datum des Geschäfts | Transaktion        | Anzahl | Preis je Stück in € |
|---------------------------------|---------------------|--------------------|--------|---------------------|
| Thomas Bamberger <sup>1)</sup>  | 1.2.2010            | Verkauf von Aktien | 4.404  | 33.6677             |
| Stefan Schulz <sup>1)</sup>     | 1.2.2010            | Verkauf von Aktien | 300    | 33.6677             |
| Dr. Gerhard Maier <sup>2)</sup> | 15.11.2010          | Verkauf von Aktien | 7.000  | 36,40               |

<sup>1)</sup> Verkauf von Aktien im Rahmen des SAP SOP 2002

<sup>2)</sup> Verkauf von Aktien im Rahmen des LTI-Plan 2000

Die Mitglieder des Aufsichtsrats werden von der SAP AG von Ansprüchen Dritter im gesetzlich zulässigen Rahmen freigestellt. Zu diesem Zweck unterhält die Gesellschaft eine Vermögensschaden-Haftpflicht-Gruppenversicherung für Organmitglieder und leitende Angestellte der SAP (D&O-Versicherung). Die bestehende D&O-Versicherung sieht keinen Selbstbehalt für Aufsichtsratsmitglieder im Sinne des Deutschen Corporate Governance Kodex vor.

#### SONSTIGE ANGABEN ZUM AUFSICHTSRAT

Im Geschäftsjahr 2010 und im Vorjahr gewährte SAP keine Vorschüsse auf künftige Gehaltszahlungen oder Kredite an Aufsichtsratsmitglieder und ging keine Haftungsverhältnisse zugunsten dieser Personen ein.

Der Vorsitzende des Aufsichtsrats, Hasso Plattner, hat nach seinem Wechsel in den Aufsichtsrat im Mai 2003 einen Beratervertrag mit der SAP abgeschlossen. Dieser Beratervertrag sieht keine Vergütungen vor. SAP entstanden daher aus diesem Vertrag lediglich Aufwendungen aus der Erstattung der angefallenen Spesen.



---

# Erklärung des Vorstands

---

Wir versichern nach bestem Wissen, dass gemäß den anzuwendenden Rechnungslegungsgrundsätzen der Konzernabschluss ein den tatsächlichen Verhältnissen entsprechendes Bild der Vermögens-, Finanz- und Ertragslage des Konzerns vermittelt und im zusammengefassten Konzernlagebericht und Lagebericht der SAP AG der Geschäftsverlauf einschließlich des Geschäftsergebnisses und die Lage des Konzerns so dargestellt sind, dass ein den tatsächlichen Verhältnissen entsprechendes Bild vermittelt wird, sowie die wesentlichen Chancen und Risiken der voraussichtlichen Entwicklung des Konzerns beschrieben sind.

Walldorf, den 3. März 2011

SAP AG  
Walldorf, Baden  
Der Vorstand



**Bill McDermott**



**Jim Hagemann Snabe**



**Werner Brandt**



**Angelika Dammann**



**Gerhard Oswald**



**Vishal Sikka**

---

# Bestätigungsvermerk des unabhängigen Abschlussprüfers

---

## AN DIE SAP AG

### Vermerk zum Konzernabschluss

Wir haben den beigefügten Konzernabschluss der SAP AG, Walldorf („SAP“ oder „die Gesellschaft“) und ihrer Tochtergesellschaften – bestehend aus Konzernbilanz zum 31. Dezember 2010, Konzern-Gewinn- und Verlustrechnung, Konzerngesamtergebnisrechnung, Konzerneigenkapitalveränderungsrechnung, Konzernkapitalflussrechnung und Konzernanhang für das an diesem Stichtag endende Geschäftsjahr – geprüft.

### Verantwortung des Vorstands für den Konzernabschluss

Der Vorstand der SAP AG ist verantwortlich für die Aufstellung dieses Konzernabschlusses. Diese Verantwortung umfasst, dass dieser Konzernabschluss in Übereinstimmung mit den IFRS, wie sie in der EU anzuwenden sind, den ergänzend nach § 315a Abs. 1 HGB anzuwendenden deutschen gesetzlichen Vorschriften sowie mit den IFRS in der vom International Accounting Standards Board verabschiedeten Fassung aufgestellt wird und unter Beachtung dieser Vorschriften ein den tatsächlichen Verhältnissen entsprechendes Bild der Vermögens-, Finanz- und Ertragslage des Konzerns vermittelt. Der Vorstand ist auch verantwortlich für die internen Kontrollen, die er als notwendig erachtet, um die Aufstellung eines Konzernabschlusses zu ermöglichen, der frei von wesentlichen – beabsichtigten oder unbeabsichtigten – falschen Darstellungen ist.

### Verantwortung des Abschlussprüfers

Unsere Aufgabe ist es, auf der Grundlage unserer Prüfung ein Urteil zu diesem Konzernabschluss abzugeben. Wir haben unsere Abschlussprüfung in Übereinstimmung mit § 317 HGB unter Beachtung der vom Institut der Wirtschaftsprüfer (IDW) festgestellten deutschen Grundsätze ordnungsmäßiger Abschlussprüfung sowie unter ergänzender Beachtung der International Standards on Auditing (ISA) und der Grundsätze des US-amerikanischen Public Company Accounting Oversight Board durchgeführt. Danach haben wir die beruflichen Verhaltensanforderungen einzuhalten und die Abschlussprüfung so zu planen und durchzuführen, dass eine hinreichende Sicherheit darüber erlangt wird, ob der Konzernabschluss frei von wesentlichen falschen Darstellungen ist.

Eine Abschlussprüfung umfasst die Durchführung von Prüfungshandlungen, um Prüfungsnachweise für die im Konzernabschluss enthaltenen Wertansätze und sonstigen Angaben zu erlangen. Die Auswahl der Prüfungshandlungen liegt im pflichtgemäßen Ermessen des Abschlussprüfers. Dies schließt die Beurteilung der Risiken wesentlicher – beabsichtigter oder unbeabsichtigter – falscher Darstellungen im Konzernabschluss ein. Bei der Beurteilung dieser Risiken berücksichtigt der Abschlussprüfer das interne Kontrollsystem, das relevant ist für die Aufstellung eines Konzernabschlusses, der ein den tatsächlichen Verhältnissen entsprechendes Bild vermittelt. Ziel hierbei ist es, Prüfungshandlungen zu planen und durchzuführen, die unter den gegebenen Umständen angemessen sind. Eine Abschlussprüfung umfasst auch die Beurteilung der Angemessenheit der angewandten Rechnungslegungsmethoden und der Vertretbarkeit der vom Vorstand ermittelten geschätzten Werte in der Rechnungslegung sowie die Beurteilung der Gesamtdarstellung des Konzernabschlusses.

Wir sind der Auffassung, dass die von uns erlangten Prüfungsnachweise ausreichend und geeignet sind, um als Grundlage für unser Prüfungsurteil zu dienen.

### Prüfungsurteil

Gemäß § 322 Abs. 3 Satz 1 HGB erklären wir, dass unsere Prüfung des Konzernabschlusses zu keinen Einwendungen geführt hat.

Nach unserer Beurteilung auf Grund der bei der Prüfung gewonnenen Erkenntnisse entspricht der Konzernabschluss in allen wesentlichen Belangen den IFRS, wie sie in der EU anzuwenden sind, und den ergänzend nach § 315a Abs. 1 HGB anzuwendenden deutschen gesetzlichen Vorschriften sowie den IFRS in der vom International Accounting Standards Board verabschiedeten Fassung und vermittelt unter Beachtung dieser Vorschriften ein den tatsächlichen Verhältnissen entsprechendes Bild der Vermögens- und Finanzlage des Konzerns zum 31. Dezember 2010 sowie der Ertragslage für das an diesem Stichtag endende Geschäftsjahr.

---

### **Vermerk zum Konzernlagebericht**

Wir haben den beigefügten mit dem Lagebericht der SAP AG zusammengefassten Konzernlagebericht der SAP AG („Konzernlagebericht“) für das am 31. Dezember 2010 endende Geschäftsjahr geprüft.

### **Verantwortung des Vorstands für den Konzernlagebericht**

Der Vorstand der SAP AG ist verantwortlich für die Aufstellung des Konzernlageberichts in Übereinstimmung mit den nach § 315a Abs. 1 HGB anzuwendenden deutschen gesetzlichen Vorschriften.

### **Verantwortung des Abschlussprüfers**

Wir haben unsere Prüfung in Übereinstimmung mit § 317 Abs. 2 HGB und unter Beachtung der für die Prüfung des Konzernlageberichts vom Institut der Wirtschaftsprüfer (IDW) festgestellten deutschen Grundsätze ordnungsmäßiger Abschlussprüfung durchgeführt. Danach ist die Prüfung des Konzernlageberichts so zu planen und durchzuführen, dass hinreichende Sicherheit darüber erlangt wird, ob der Konzernlagebericht mit dem Konzernabschluss sowie mit den bei der Abschlussprüfung gewonnenen Erkenntnissen in Einklang steht, insgesamt ein zutreffendes Bild von der Lage des Konzerns vermittelt und die Chancen und Risiken der zukünftigen Entwicklung zutreffend darstellt.

### **Prüfungsurteil**

Gemäß § 322 Abs. 3 Satz 1 HGB erklären wir, dass unsere Prüfung des Konzernlageberichts zu keinen Einwendungen geführt hat.

Nach unserer Beurteilung auf Grund der bei der Prüfung des Konzernabschlusses und Konzernlageberichts gewonnenen Erkenntnisse steht der Konzernlagebericht in Einklang mit dem Konzernabschluss, vermittelt insgesamt ein zutreffendes Bild von der Lage des Konzerns und stellt die Chancen und Risiken der zukünftigen Entwicklung zutreffend dar.

### **Vermerk zum internen Kontrollsystem für die Finanzberichterstattung im Konzernabschluss gemäß PCAOB**

Wir haben das zum 31. Dezember 2010 bestehende interne Kontrollsystem für die Finanzberichterstattung im Konzernabschluss der SAP AG und ihrer Tochtergesellschaften geprüft. Dieses Kontrollsystem basiert auf Kriterien, die im Internal Control – Integrated Framework des Committee of Sponsoring Organizations of the Treadway Commission (COSO) festgelegt sind.

### **Verantwortung des Vorstands für das interne Kontrollsystem**

Die Aufrechterhaltung eines wirksamen internen Kontrollsystems für die Finanzberichterstattung im Konzernabschluss und die Einschätzung seiner Wirksamkeit, die im Bericht des Vorstands über das interne Kontrollsystem für die Finanzberichterstattung im Konzernabschluss beinhaltet ist, liegen in der Verantwortung des Vorstands.

### **Verantwortung des Abschlussprüfers**

Unsere Aufgabe ist es, auf der Grundlage unserer Prüfung eine Beurteilung des internen Kontrollsystems für die Finanzberichterstattung im Konzernabschluss der Gesellschaft abzugeben. Wir haben unsere Prüfung unter Beachtung der Standards des US-amerikanischen Public Company Accounting Oversight Board durchgeführt. Danach ist die Prüfung so zu planen und durchzuführen, dass mit hinreichender Sicherheit beurteilt werden kann, ob in allen wesentlichen Belangen ein wirksames internes Kontrollsystem für die Finanzberichterstattung im Konzernabschluss aufrechterhalten wurde. Im Rahmen der Prüfung des internen Kontrollsystems für die Finanzberichterstattung im Konzernabschluss haben wir uns ein Verständnis über dieses interne Kontrollsystem verschafft, das Risiko eingeschätzt, dass eine wesentliche Schwäche in diesem Kontrollsystem vorliegt, basierend auf dieser Einschätzung den Aufbau und die Wirksamkeit der internen Kontrollen getestet und beurteilt sowie fallweise weitere erforderliche Prüfungshandlungen durchgeführt.

Das interne Kontrollsystem für die Finanzberichterstattung im Konzernabschluss eines Unternehmens dient dazu, eine hinreichende Sicherheit bezüglich der Zuverlässigkeit der Finanzberichterstattung im Konzernabschluss sowie der Erstellung von Abschlüssen zu externen Zwecken im Einklang mit allgemein anerkannten Rechnungslegungsgrundsätzen, zu gewährleisten. Das interne Kontrollsystem für die Finanzberichterstattung im Konzernabschluss eines Unternehmens beinhaltet diejenigen Richtlinien und Verfahren, welche (1) eine Buchführung sicherstellen, die in angemessenem Detaillierungsgrad richtig und zutreffend die Transaktionen und die Verfügung über die Vermögensgegenstände der Gesellschaft widerspiegelt; (2) mit hinreichender Sicherheit gewährleisten, dass Transaktionen so erfasst werden, dass die Erstellung von Abschlüssen in Übereinstimmung mit den anzuwendenden Rechnungslegungsgrundsätzen möglich ist, und (3) hinreichende Sicherheit bezüglich der Vermeidung oder rechtzeitigen Aufdeckung von nicht autorisiertem Erwerb, Gebrauch oder nicht autorisierter Veräußerung von Vermögensgegenständen des Unternehmens bieten, soweit dies einen wesentlichen Einfluss auf den Konzernabschluss haben könnte.

Auf Grund der ihm innewohnenden Grenzen kann das interne Kontrollsystem für die Finanzberichterstattung im Konzernabschluss Falschaussagen gegebenenfalls nicht verhindern oder aufdecken. Ebenso sind Prognosen zur Beurteilung der Wirksamkeit in künftigen Perioden mit dem Risiko behaftet, dass Kontrollen wegen geänderter Verhältnisse unzureichend werden oder sich der Grad der Einhaltung der Richtlinien und Verfahren verschlechtert.

Wir sind der Auffassung, dass die von uns erlangten Prüfungsnachweise ausreichend und geeignet sind, um als Grundlage für unser Prüfungsurteil zu dienen.

### **Prüfungsurteil**

Nach unserer Überzeugung verfügte SAP basierend auf den Kriterien des von COSO herausgegebenen Internal Control – Integrated Framework zum 31. Dezember 2010 über ein wirksames internes Kontrollsystem für die Finanzberichterstattung im Konzernabschluss.

Mannheim, den 3. März 2011

KPMG AG  
Wirtschaftsprüfungsgesellschaft



**Prof. Dr. Schindler**  
Wirtschaftsprüfer



**Meurer**  
Wirtschaftsprüfer

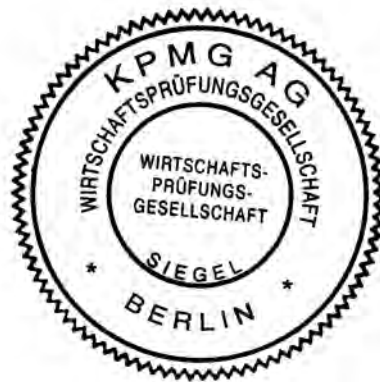

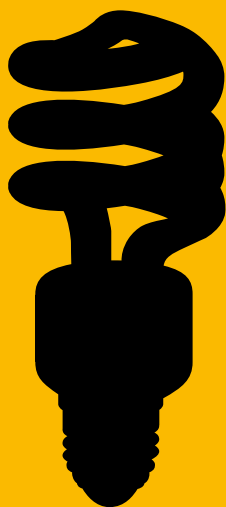

# 30 Mio.

LÖSUNGEN FÜR INTELLIGENTE STROMNETZE VON SAP HELFEN 30 MILLIONEN  
HAUSHALTEN, VERANTWORTUNGSVOLL MIT ENERGIE UMZUGEHEN.



# 65 Zusammengefasster Konzernlagebericht

|     |                                                      |
|-----|------------------------------------------------------|
| 67  | Der SAP-Konzern                                      |
| 72  | Software- und Serviceportfolio                       |
| 84  | Kunden                                               |
| 87  | Forschung und Entwicklung                            |
| 95  | Partnernetzwerk                                      |
| 97  | Akquisitionen                                        |
| 99  | Mitarbeiter                                          |
| 103 | Änderungen in der Geschäftsleitung                   |
| 104 | Grundlagen der finanzbezogenen Lageberichterstattung |
| 111 | Wirtschaftliche Rahmenbedingungen                    |
| 113 | Vermögens-, Finanz- und Ertragslage                  |
| 129 | Nachhaltigkeit                                       |
| 132 | Vermögens-, Finanz- und Ertragslage der SAP AG       |
| 135 | Gesamtaussage zur wirtschaftlichen Lage der SAP      |
| 136 | Corporate Governance                                 |
| 137 | Übernahmerelevante Angaben                           |
| 140 | Risikobericht                                        |
| 158 | Maßnahmen und Ereignisse nach Geschäftsjahresende    |
| 159 | Ausblick                                             |

---

# Zusammengefasster Konzernlagebericht

---

## VORAUSSCHAUENDE AUSSAGEN

Dieser Geschäftsbericht enthält vorausschauende Aussagen und Informationen, die auf den Ansichten und Annahmen der Geschäftsleitung beruhen. Diese stützen sich ihrerseits auf die Informationen, die der Geschäftsleitung gegenwärtig zur Verfügung stehen. Sämtliche im Geschäftsbericht enthaltenen Aussagen, die keine vergangenheitsbezogenen Tatsachen darstellen, sind vorausschauende Aussagen im Sinne des US-amerikanischen „Private Securities Litigation Reform Act“ von 1995. Solche zukunftsbezogenen Aussagen resultieren aus unseren aktuellen Erwartungen, Annahmen und Prognosen im Hinblick auf zukünftige Umstände und Ereignisse. Folglich unterliegen diese vorausschauenden Aussagen und Informationen verschiedensten Risiken und Unsicherheiten, von denen viele außerhalb unseres Einflussbereichs liegen. Bei Eintreten eines oder mehrerer dieser Unsicherheiten oder Risiken oder falls die Annahmen der Geschäftsleitung sich als falsch erweisen, können unsere tatsächlichen Ergebnisse erheblich von den Erwartungen abweichen, die in den vorausschauenden Aussagen und Informationen beschrieben sind oder die sich daraus ableiten lassen. Diese Risiken und Unsicherheiten sind im Abschnitt Risikofaktoren beschrieben.

Wörter wie „erwarten“, „glauben“, „rechnen mit“, „fortführen“, „schätzen“, „voraussagen“, „beabsichtigen“, „zuversichtlich sein“, „davon ausgehen“, „planen“, „vorhersagen“, „sollen“, „sollten“, „können“, „könnten“, „werden“, „Ausblick“ und „Ziele“ sowie ähnliche Begriffe in Bezug auf SAP sollen solche vorausschauenden Aussagen anzeigen. Vorausschauende Aussagen sind beispielsweise in den folgenden Abschnitten enthalten: im Kapitel Entwicklung der Ertragslage, in der quantitativen und qualitativen Offenlegung von Marktrisiken

gemäß International Financial Reporting Standards (IFRS) 7, die sich im vorliegenden Geschäftsbericht im Anhang zum Konzernabschluss findet, im Abschnitt Risikofaktoren, im Ausblick sowie in weiteren zukunftsorientierten Darstellungen innerhalb dieses Geschäftsberichts. Um ein vollständiges Bild von den Faktoren zu erhalten, die unsere zukünftigen Ergebnisse beeinflussen könnten, sollten sowohl der vorliegende Geschäftsbericht als auch unser Jahresbericht Form 20-F sowie andere bei der US-amerikanischen Securities and Exchange Commission (SEC) hinterlegte Unterlagen herangezogen werden. Die vorausschauenden Aussagen geben die Sicht zu dem Zeitpunkt wieder, zu dem sie getätigt wurden. Dem Leser wird empfohlen, diesen Aussagen kein unangemessen hohes Vertrauen zu schenken. Abgesehen von rechtlichen Veröffentlichungspflichten übernehmen wir keine Verpflichtung gegenüber der Öffentlichkeit, vorausschauende Aussagen aufgrund neuer Informationen oder Umstände, die sich nach dem Datum der Veröffentlichung ergeben, aufgrund künftiger Ereignisse oder aus anderen Gründen zu aktualisieren oder zu korrigieren.

Alle Angaben in diesem Bericht beziehen sich, sofern nicht anders vermerkt, auf den 31. Dezember 2010 beziehungsweise das Geschäftsjahr, das an diesem Datum endet.

---

## DER SAP-KONZERN

SAP wurde 1972 gegründet und ist – gemessen am Umsatz mit Software und softwarebezogenen Services – weltweit führend bei Anwendungssoftware für Unternehmen. Gemessen an der Marktkapitalisierung sind wir weltweit der drittgrößte unabhängige Softwarehersteller. SAP betreut mehr als 109.000 Kunden in über 120 Ländern. Zur Konzernstruktur gehören Tochterunternehmen in jedem größeren Land der Erde, in denen die über 53.000 Mitarbeiter des Konzerns tätig sind. Das neu erworbene Tochterunternehmen Sybase Inc. agiert als selbstständige Geschäftseinheit.

## Geschäftstätigkeit und Organisationsstruktur

### Geschäftstätigkeit

Unser Kerngeschäft ist der Vertrieb von Nutzungsrechten an den SAP-Softwarelösungen und von damit verbundenen Services. Dabei bieten wir unseren Kunden eine große Auswahl, um ihre unterschiedlichen funktionellen Anforderungen abzudecken. Unsere Lösungen umfassen betriebswirtschaftliche Standardsoftware und -technologien sowie branchenspezifische Anwendungen. Sie sollen Unternehmen in die Lage versetzen, ihre Geschäftsprozesse effizient und flexibel zu gestalten, Entscheidungen zeitnah zu treffen und die betriebliche Wertschöpfung nachhaltig zu verbessern. Durch die hauptspeicherbasierte Technologie (In-Memory-Technologie), die wir in unseren Datenmanagementprodukten einsetzen, haben unsere Kunden jederzeit und an jedem Ort unmittelbaren Zugriff auf die von ihnen benötigten Daten.

Die Basis unseres Produktportfolios bilden Lösungen, die fest beim Kunden installiert sind (On Premise), bei Bedarf über das Internet abgerufen werden können (On Demand) oder über mobile Endgeräte zugänglich sind (On Device). Die folgenden zentralen Anwendungen unseres Portfolios werden für die verschiedenen oben genannten Betriebs- und Nutzungsmodelle angeboten. Sämtliche Daten und Prozesse sind dabei in jeder Betriebsumgebung vollständig aufeinander abgestimmt:

- Die SAP Business Suite für große Kunden und globale Konzerne: Sie umfasst Anwendungen zur Unterstützung betrieblicher Kernprozesse vom Einkauf über die Produktion, die Lagerhaltung und den Vertrieb bis hin zu allen administrativen Bereichen und der Kundenbetreuung. Darüber hinaus bietet sie auch branchenspezifische Lösungen, unter anderem für den Bankensektor, die Hightechbranche, Öl- und Gasunternehmen, die Versorgungsindustrie, die Chemiebranche, das Gesundheitswesen, den Handel, die Konsumgüterindustrie und die öffentliche Verwaltung.
- Die Lösungen SAP Business All-in-One, SAP Business ByDesign sowie SAP Business One für kleine und mittelgroße Kunden.
- Das SAP-BusinessObjects-Portfolio, das Anforderungen von Entscheidungsträgern und Prozessverantwortlichen in Unternehmen aller Größenordnungen abdeckt: Diese sogenannten Business User nutzen Software, um Informationen zu analysieren und Berichte und Unternehmenspläne zu erstellen. Sie sind damit in der Lage, strategische und taktische Entscheidungen auf einer fundierten Grundlage zu treffen. Gleichzeitig hilft ihnen das SAP-BusinessObjects-Portfolio bei der Steuerung von Risiken und der Einhaltung gesetzlicher Vorgaben.
- SAP-Lösungen für nachhaltige Unternehmensführung, die unseren Kunden bei der Erreichung von Nachhaltigkeitszielen helfen: Dazu zählen Lösungen für die Messung der Nachhaltigkeitsleistung, das Energie- und CO<sub>2</sub>-Management sowie Lösungen für Produktsicherheit, Umwelt-, Arbeits- und Gesundheitsschutz.
- Die Plattform SAP NetWeaver, die Informationen und Geschäftsprozesse über verschiedene Technologien und Organisationsformen hinweg integriert.
- Unternehmenssoftware und Services von Sybase, einem Unternehmen der SAP, für die Steuerung und Analyse von Informationen und deren Bereitstellung auf mobilen Endgeräten: Mit Sybase-Software können Unternehmen die Vision eines „drahtlosen“ Unternehmens realisieren, das heißt, wichtige Informationen und Anwendungen stehen jederzeit auf mobilen Endgeräten zur Verfügung. SAP erwarb Sybase 2010.

---

## **Organisationsstruktur**

Wir firmieren unter SAP AG und haben unseren Sitz in Walldorf, Deutschland. Unser Unternehmen ist in folgende Bereiche untergliedert, die Hand in Hand arbeiten:

- Technology & Innovation Platform (Technologie- und Innovationsplattform)
- Products & Solutions (Produkte und Lösungen)
- Global Customer Operations (Vertrieb und Beratung)
- Chief Operations Office (Betriebsprozesse)
- Global Finance & Administration (Finanzen und Verwaltung)
- Human Resources (Personalwesen)
- On Device & Sybase

Die SAP vermarktet und vertreibt ihre Produkte und Dienstleistungen in den einzelnen Ländern vorwiegend über ihr weltweites Netz von Tochterunternehmen. Die Tochterunternehmen haben Lizenzverträge geschlossen, nach denen sie zum Vertrieb von SAP-Produkten an Kunden innerhalb eines bestimmten Gebiets berechtigt sind. Gemäß diesen Verträgen führen die Tochterunternehmen einen bestimmten Prozentsatz des von ihnen durch den Vertrieb erwirtschafteten Umsatzes an den Lizenzgeber ab. In einigen Ländern bestehen Vertriebsvereinbarungen mit unabhängigen Wiederverkäufern.

Eine vollständige Aufstellung der Tochterunternehmen, assoziierten Unternehmen und sonstigen Beteiligungsunternehmen findet sich unter Textziffer (35) im Konzernanhang.

Wir bilden unsere Aktivitäten im internen Berichtswesen über die vier Segmente Produkt, Beratung, Schulung und Sybase ab. Eine weiterführende Beschreibung der Segmente finden Sie unter Textziffer (29) im Konzernanhang.

## **Leitziel und Strategie**

### **Markt**

Der Markt für Unternehmenssoftware ist ein globaler Wachstumsmarkt, in dem sich die tief greifenden Veränderungen in der Weltwirtschaft widerspiegeln. Verschiedene Marktkräfte wirken sich auf die Arbeitsweise von Unternehmen aus: Aufstrebende Volkswirtschaften entwickeln sich mit rasantem Tempo weiter. Das immer stärker vernetzte und digitalisierte Geschäftsumfeld ist von einem ständigen Wandel geprägt. Der zunehmende Ressourcenverbrauch steht der wachsenden Verpflichtung zu nachhaltigem Wirtschaften gegenüber. Die

Datenflut in der Gesellschaft und in Unternehmen nimmt neue Ausmaße an. Die Arbeitskräfte von heute sind versierter und anspruchsvoller im Umgang mit Technologien und Anwendungen. Um wettbewerbsfähig zu bleiben, müssen sich Unternehmen permanent an die sich ändernden Kundenwünsche anpassen, innovative und konkurrenzfähige Produkte auf den Markt bringen und kontinuierlich Strukturen und Prozesse im eigenen Unternehmen und im Kunden- und Lieferantennetzwerk optimieren. Nur mit modernen informationstechnischen Lösungen können sie sich erfolgreich im Wettbewerb und im neuen globalen Marktumfeld durchsetzen.

### **Trends und generelle Richtung**

Vor diesem Hintergrund müssen Unternehmen ihr Geschäftsmodell immer wieder neu ausrichten – etwa wenn sie Schwellenmärkte und neue, unbekannte Branchen erschließen oder sich als Unternehmensnetzwerk anstatt als Einzelunternehmen im Wettbewerb behaupten wollen. Hinzu kommt die Forderung nach Transparenz, Offenheit und einer verantwortungsvollen Unternehmensführung, die private und öffentliche Unternehmen gegenüber ihren Kunden und der Gesellschaft zu erfüllen haben.

Technologie spielt für Unternehmen bei der Umsetzung ihrer Strategien eine entscheidende Rolle. Mit In-Memory Computing, Cloud Computing und Mobilität kommen in den nächsten drei bis fünf Jahren drei Haupttrends zusammen, die den größten Generationswechsel seit dem Übergang von der Mainframe- zur Client-Server-Architektur in den frühen 1990er Jahren bedeuten. Diese bahnbrechenden Neuerungen werden Unternehmen nicht nur innovative Geschäftsabläufe ermöglichen, sondern einen grundlegenden Wandel in der Wirtschaft bewirken und vorantreiben. Unternehmen müssen sich auf das neue Tempo einstellen, in dem Kunden und Mitarbeiter mit digitalen Endgeräten miteinander kommunizieren. Gleichzeitig müssen sie es als Herausforderung und Chance nutzen. Denn das Tempo nimmt mit dem ungebrochenen Siegeszug mobiler Endgeräte und dem damit verbundenen Zugang zu Daten immer mehr zu: Mobilgeräte setzen sich schneller durch als vor ihnen der PC und das Internet. Die leistungsstarken Geräte von heute, die auch ihre jeweilige Position erkennen können, werden die Art und Weise, wie Unternehmen arbeiten, nachhaltig beeinflussen.

---

Mit dem wachsenden Arbeitstempo und der zunehmenden Verbreitung der Mobiltechnologie nimmt auch das Datenaufkommen dramatisch zu. In einer zunehmend vernetzten Welt werden Menschen, Maschinen, Geräte und Anlagen immer schneller und immer umfangreicher Informationen produzieren. Unternehmen – große wie kleine, private wie öffentliche – brauchen Möglichkeiten, um diese Fülle an Daten in Echtzeit zu analysieren. Nur so erhalten sie aussagekräftige Informationen für fundierte Entscheidungen. Die In-Memory-Technologie bedeutet dabei einen Entwicklungssprung in der Datenverarbeitung: Dank der Fortschritte bei der Speichertechnologie können gewaltige Datenmengen im Hauptspeicher abgelegt werden, sodass sich die Zugriffszeit auf Daten verkürzt. Unternehmen werden somit künftig ihre Transaktionsdaten aus ihren zentralen ERP-Systemen in Echtzeit analysieren können.

Höhere Effizienz und mehr Nachhaltigkeit im gesamten Geschäftsnetzwerk stehen auch künftig für Unternehmen im Mittelpunkt. Mit Cloud Computing und Virtualisierung können IT-Dienste nun dynamisch über das Internet bereitgestellt und genutzt werden. Private und öffentliche Cloud-Infrastrukturen schaffen die Voraussetzungen für die nachhaltige Nutzung von Diensten, da diese nur bei Bedarf in Anspruch genommen werden (On Demand). So werden Infrastruktur- und Implementierungskosten ebenso vermieden wie ein unnötiger Energieverbrauch durch nicht genutzte Technologien.

Informationstechnische Lösungen spielen bei diesen Trends eine Schlüsselrolle. Unternehmen verfügen damit bei ihren Entscheidungen über eine breite Datenbasis, können Strategie und Umsetzung verknüpfen und ihren Mitarbeitern Informationen auf mobilen Endgeräten zur Verfügung stellen – kostengünstig und schnell, wie es in dem neuen globalen Marktumfeld unabdingbar ist.

### **Leitziel**

Wir wollen jeden Kunden auf seinem Weg zum Best-run Business unterstützen. Viele Unternehmen verlassen sich heute bei ihrer Geschäftsabwicklung auf unsere Lösungen und Services. Deshalb wollen wir dafür Sorge tragen, dass sie auch für die Herausforderungen der Zukunft gerüstet sind. Mit Lösungen, die auf jedem Gerät genutzt werden können, sprechen wir einen neuen Markt an Endanwendern im Unternehmen an. Den technologieaffinen Mitarbeitern von heute bieten wir bessere

Möglichkeiten und schaffen damit die Grundlage für höhere Produktivität und Wertsteigerung – sowohl für Unternehmen als auch für jeden einzelnen Mitarbeiter.

Die innovativen Technologien und Dienstleistungen der SAP verhelfen Kunden weltweit zu mehr Effizienz und Effektivität. Durch die Verwirklichung dieses Ziels leisten wir gleichzeitig einen wertvollen Beitrag zur weltweiten wirtschaftlichen Entwicklung. Unser Produkt- und Serviceportfolio unterstützt unsere Kunden bei der Optimierung ihrer Geschäftsabläufe. Dank betriebswirtschaftlicher Analysen erhalten sie die Informationstransparenz, Effizienz und Flexibilität, die sie brauchen, um schnell und effektiv auf Veränderungen in ihrem Geschäftsumfeld zu reagieren und die Vorteile von Geschäftsnetzwerken auszuschöpfen.

So umfassen unsere On-Premise- und On-Demand-Produkte Echtzeitanalysen, die Kunden jeder Größe helfen, ihre Unternehmensstrategie konsequent in die Praxis umzusetzen. Immer mehr Mitarbeiter nutzen in ihrer täglichen Arbeit mobile Endgeräte; daher bieten wir unsere marktführenden Geschäftsprozessanwendungen und Analyselösungen auch für diese Zielgruppe an. Und schließlich gewährleisten wir unseren Kunden das Zusammenspiel ihrer Anwendungen in diesen komplexen IT-Landschaften – gleich ob On Premise, On Demand oder On Device – sowie aufeinander abgestimmte Prozesse und Daten.

Im Zentrum unserer Strategie steht die Verantwortung gegenüber unseren Kunden: Ihnen möchten wir einen noch größeren Nutzen bieten und zur Senkung ihrer IT-Kosten beitragen. Wir wollen für unsere Kunden, Mitarbeiter, unser Partnernetz, für alle Einflussnehmer und für unsere Aktionäre ein herausragendes Unternehmen sein. Was uns anspornt, ist das Streben nach Wachstum und nach einer vertrauensvollen Partnerschaft mit Kunden und Mitbewerbern.

### **Wettbewerb**

SAP ist – gemessen am Umsatz mit Software und softwarebezogenen Services – weltweit führend bei Anwendungssoftware für Unternehmen. Hauptwettbewerber auf globaler Ebene sind IBM, Microsoft und Oracle. Während wir uns auf das Segment Unternehmenssoftware konzentrieren, erzielen unsere Hauptwettbewerber einen Großteil ihres Umsatzes in anderen Segmenten des IT-Marktes: beispielsweise Datenbankmanagement (Oracle), Betriebssysteme und Desktopanwendungen (Microsoft) und IT-Dienstleistungen (IBM). Im Vergleich zu den

---

meisten unserer Wettbewerber können wir unseren Kunden je nach Bedarf auch flexible Modelle anbieten, darunter auch eine Kombination aus On-Premise- und On-Demand-Anwendungen (Hybridmodell). Darüber hinaus besteht auch die Möglichkeit, Unternehmenssoftware über mobile Endgeräte zu nutzen (On Device).

Unsere Wettbewerber im Bereich On-Demand-Software sind unter anderem NetSuite, Salesforce.com und Workday. Wettbewerber im Marktsegment Business Intelligence mit den Lösungen für Business User sind unter anderem SAS Institute, Oracle und IBM. Zu den Hauptwettbewerbern im Bereich der Sybase-Produkte gehören IBM, Microsoft und Oracle. Darüber hinaus stehen wir auch im Wettbewerb mit Spezialanbietern in einzelnen Teilbereichen, je nach Produkt- oder Serviceangebot.

### **Wachstumsstrategie**

Ziel unserer Strategie ist es, unsere Position als Marktführer zu stärken. Wir sind der festen Überzeugung, dass uns die Markttrends und das Wettbewerbsumfeld außerordentliche Möglichkeiten bieten, Mehrwert für unsere Kunden zu schaffen, führend bei Innovationen zu sein und als Unternehmen weiter zu wachsen. Unsere Strategie besteht darin, auf der Basis eines stabilen Kerns Innovationen zu schaffen: Wir wollen herausragende Unternehmensanwendungen entwickeln, die sich ohne Unterbrechung des Geschäftsbetriebs implementieren lassen. Dabei beziehen wir unser Partnernetz ein, um unseren Kunden eine bestmögliche Wertschöpfung und Innovationen zu bieten. Folgende Maßnahmen sollen uns helfen, unser Wachstumspotenzial zu realisieren:

### **Bereitstellung weltweit führender Unternehmenslösungen**

Ziel unserer Produktstrategie ist es, unsere Führungsrolle bei On-Premise-Anwendungen (ERP-Kernanwendungen und SAP Business Suite) auszubauen. Gleichzeitig wollen wir neue On-Demand-Lösungen einführen, neue Anbindungsmöglichkeiten für mobile Endgeräte schaffen und die Daten und Prozesse aller Betriebsmodelle so aufeinander abstimmen, dass vernetzte Lösungen entstehen. Wir glauben, dass wir durch eine verstärkte Ausrichtung auf On-Demand- und On-Device-Produkte unser Marktpotenzial verdoppeln und Wachstum erzielen können. Unser besonderes Augenmerk gilt dabei den Bereichen Business Intelligence und Analytics, Middleware, Cloud-Lösungen und In-Memory Computing.

In den vergangenen Jahren hat sich unser Schwerpunkt in diese Richtung verlagert. Unsere On-Premise-Lösungen für spezielle Branchen bilden die Grundlage unseres Produktportfolios. Ein wichtiger Wachstumstreiber sind unsere Business-Analytics-Lösungen, zu denen auch Produkte aus unserer Akquisition von Business Objects gehören. Mit In-Memory-Technologie können wir Business-Analytics-Anwendungen anbieten, die in der Vergangenheit technisch nicht realisierbar oder nicht wirtschaftlich gewesen wären. Darüber hinaus brachten wir die Lösung SAP Business ByDesign auf den Markt, ein Komplettpaket von Anwendungen, die vollständig über das Internet laufen und uns neue Marktsegmente eröffnen. SAP Business ByDesign wird auch für unsere Partner als Cloud-Plattform dienen, für die sie ergänzende Lösungen entwickeln können. Durch unsere Übernahme von Sybase im Jahr 2010 ist es uns jetzt möglich, Unternehmensanwendungen, Business-Analytics-Software und eine mobile Infrastruktur miteinander zu kombinieren. Auf diesem Weg sollen drahtlose Unternehmen entstehen. Kunden werden die immer weiter zunehmende Menge an Daten besser verarbeiten und auf unterschiedlichen Geräten für Mitarbeiter zur Verfügung stellen können. Dabei haben sie die Sicherheit, dass die Daten und Prozesse über alle Betriebsumgebungen aufeinander abgestimmt sind.

Darüber hinaus brachten wir weitere SAP-Lösungen für nachhaltige Unternehmensführung auf den Markt. Die Lösungen unterstützen Unternehmen bei der Verringerung ihres Energieverbrauchs und der Treibhausgasemissionen, bei der Messung ihrer Nachhaltigkeitsleistung sowie beim Arbeitsschutz und bei der Produktsicherheit. Kunden, die ihr Geschäft optimieren oder in größeren Wertschöpfungsketten und Unternehmensnetzwerken agieren, brauchen Transparenz hinsichtlich ihres Ressourceneinsatzes und ihrer Ergebnisse. Hierbei verlassen sie sich auf die SAP: Wir helfen ihnen, ein ausgewogenes Gleichgewicht zwischen sozialen, wirtschaftlichen und ökologischen Interessen zu erreichen und ihre durchgängigen Geschäftsprozesse nachhaltig umzugestalten.



---

### **Erhöhung des Innovationstempos – bei gleichzeitiger Kontinuität**

Unsere Branche steht derzeit an einem entscheidenden Wendepunkt: In-Memory-, Mobiltechnologie und Business-Analytics-Lösungen können zusammen zu neuen Anwendungen führen und die traditionellen IT-Landschaften (darunter auch Hardware, Datenbanken, Middleware und Anwendungen) von Grund auf verändern. Gleichzeitig haben unsere Kunden in den vergangenen Jahrzehnten erheblich in ihre Unternehmensanwendungen investiert, um ihre Geschäftsabläufe zu optimieren. Wir wollen Produkte und Anwendungen anbieten, die einerseits diese zukunftsweisenden IT-Trends aufgreifen und andererseits auf den Daten und Systemstrukturen aufbauen, die in den Unternehmen vorhanden sind. Damit erschließen wir ein enormes Wertpotenzial für unsere Kunden.

### **Ausbau unseres Partnernetzes**

Wir sind fest davon überzeugt, dass neben einer großen Produktauswahl, Innovationen und einer vollständig offenen Plattform vor allem Partnerschaften unabdingbare Voraussetzungen sind, um unsere Wachstumsziele zu erreichen. Auch unsere Kunden teilen diese Ansicht. Deshalb werden wir weiterhin in ein breites Partnernetz investieren. Nur so können wir Produkte und Technologien zu einer nahtlosen Komplettlösung für unsere Kunden zusammenfügen und in verschiedene Kunden- und Marktsegmente vordringen. Unseren Kunden bieten wir damit mehr Auswahl und einen größeren Mehrwert.

### **Strategisches Finanzmanagement**

Wichtigstes Ziel unseres Finanzmanagements ist es, eine Mindestliquidität im Konzern sicherzustellen, um eine jederzeitige Zahlungsfähigkeit zu gewährleisten. Finanzierungsmaßnahmen können zum einen notwendig sein, um diese Konzernmindestliquidität proaktiv sicherzustellen. Zum anderen können sie aus einem zusätzlichen Kapitalbedarf resultieren, der nicht durch den freien Cashflow gedeckt werden kann, etwa bei größeren Akquisitionen. Die im Jahr 2010 durchgeführten Finanzierungsmaßnahmen dienten im Wesentlichen dazu, die Akquisition von Sybase zu finanzieren.

### **Finanzierungsprogramm für SAP-Lösungen**

Um Unternehmen die Investitionen in Anwendungssoftware und die damit verbundenen Dienstleistungen sowie Hardware zu erleichtern, bietet SAP gemeinsam mit führenden globalen Finanzierern ein Finanzierungsprogramm für SAP-Lösungen unter dem Namen SAP Financing an. Das Programm ist in über 45 Ländern verfügbar und wird mit IT-Finanzierern für unsere Kunden realisiert. Mit über 2.500 Finanzierungstransaktionen seit Beginn des Programms hat sich SAP Financing als fester Bestandteil von SAP Services etabliert, was von einer hohen Marktakzeptanz zeugt. Dabei konnten SAP-Kunden aus allen Segmenten – Mittelstands- und Großkunden – Finanzierungslösungen nutzen. Das Finanzierungsprogramm bietet den SAP-Kunden alle gängigen Finanzierungsformen und die daraus entstehenden Vorteile: So schonen sie beispielsweise ihre Liquidität und verfügen über Alternativen zu den Kreditangeboten der Hausbank. Dadurch erhalten unsere Kunden eine höhere Flexibilität bei ihrer Finanzierung und können damit verbundene wirtschaftliche Vorteile erschließen.

## SOFTWARE- UND SERVICEPORTFOLIO

Kern der SAP-Produkt- und -Servicestrategie ist es, Kunden jederzeit und überall Zugang zu ihrer Unternehmenssoftware zu ermöglichen – ob sie fest installierte Lösungen einsetzen (On Premise), die Software bei Bedarf über das Internet nutzen (On Demand) oder auf mobilen Endgeräten arbeiten (On Device). Hierfür arbeiten wir weltweit eng mit Kunden und Partnern zusammen.

Unsere Produktstrategie baut auf der skalierbaren, leistungsstarken Technologieplattform SAP NetWeaver mit ihrem breiten Funktionsspektrum auf. Auf dieser Basis können wir unser Innovationstempo für neue Produkte erhöhen und an Neuentwicklungen mit Partnern und Kunden zusammenarbeiten. Gemeinsam wollen wir den Nutzen neuer Software, ergänzender Lösungen und richtungsweisender Technologien erschließen, die die Branche revolutionieren und Unterneh-

men einen deutlichen Mehrwert bieten werden. Hier sind in erster Linie Software as a Service (SaaS), Cloud Computing und In-Memory Computing zu nennen.

Bei unseren Bemühungen, mehr Wertschöpfung für unsere Kunden zu schaffen, steht deren Investitionssicherheit für uns an oberster Stelle. Wir wollen, dass unsere Kunden Innovationen schrittweise, nach ihren branchenspezifischen Anforderungen und ohne Betriebsunterbrechungen einführen können.

Ein ebenso wichtiges Anliegen ist uns, die Integrität und Sicherheit der betrieblichen Abläufe und Daten unserer Kunden zu gewährleisten. Wir wollen sie hierbei unterstützen und sie vor den vielfältigen Gefahren und Bedrohungen der heutigen Zeit schützen. Sicherheit ist für uns untrennbar mit unserem Auftrag verbunden, hochwertige Software zu liefern. Hierfür arbeiten wir kontinuierlich an der Verbesserung unserer Sicherheitsstandards bei der Softwareentwicklung und kaufen neue Technologien und Know-how hinzu.

## Software- und Serviceportfolio

### Kernkompetenzen

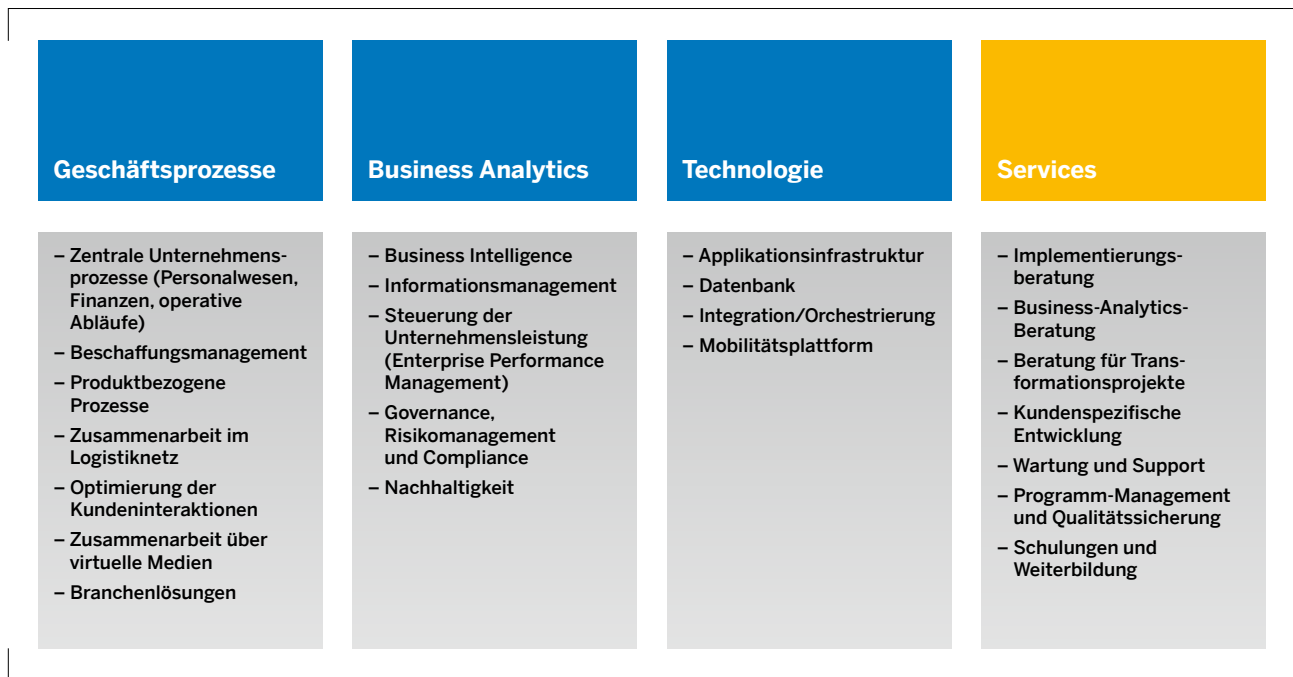

### Lösungskategorien

---

## Softwareportfolio

### On-Premise-Lösungen

#### Lösungen für einzelne Geschäftsbereiche

##### SAP Business Suite

Mit den integrierten Anwendungen der SAP Business Suite können Unternehmen ihre Geschäfts- und IT-Strategien besser aufeinander abstimmen und präzise umsetzen. Die modular aufgebauten Lösungen, die sich mit anderer Software der SAP oder von Drittanbietern verknüpfen lassen, helfen ihnen, ihre zentralen, branchenspezifischen Abläufe zu steuern. Kunden können die Anwendungen der SAP Business Suite schrittweise einführen – um ganz bestimmte Anforderungen nach ihrem eigenen Zeitplan zu bewältigen und gezielt die Prozesse mit dem größten Wertpotenzial zu optimieren. Durch den Einsatz der Software gewinnen sie eine umfassende Sicht auf alle Unternehmensbereiche, erreichen mehr Effizienz im operativen Geschäft und sind in der Lage, flexibel auf veränderte Anforderungen zu reagieren.

Mit Erweiterungspaketen (Enhancement Packages), die Kunden im Rahmen unserer Supportangebote erhalten, lassen sich die Anwendungen der SAP Business Suite nach Bedarf ausbauen. Kostspielige und zeitaufwendige Upgrades entfallen dadurch. Die Lösungen sorgen für mehr Transparenz über alle Abteilungen und Geschäftsbereiche hinweg und schaffen damit die Voraussetzungen für fundierte Entscheidungen.

Folgende Anwendungen gehören zur SAP Business Suite:

- SAP Customer Relationship Management (SAP CRM) unterstützt Unternehmen bei der Steuerung und Überwachung von Prozessen im Vertrieb, Kundenservice und Marketing. Auch wichtige nachgelagerte Aktivitäten wie das Ersatzteilmanagement, die Nachfrageplanung, die Fakturierung und Auftragsabwicklung lassen sich mit SAP CRM durchführen. Integrierte Analyse- und Business-Intelligence-Funktionen und umfangreiche Funktionen für die Interaktion mit dem Kunden runden das Angebotsspektrum der Anwendung ab, die auch für mobile Endgeräte zugänglich ist. Damit hilft SAP CRM Unternehmen, wichtige Informationen über ihre Kunden zu gewinnen, Änderungen vorherzusehen und Kurskorrekturen zeitnah vorzunehmen.

- SAP ERP sorgt für eine durchgängige Geschäftsabwicklung im Finanzwesen, im Vertrieb, in der Personalwirtschaft, der Anlagenverwaltung, der Beschaffung und in anderen zentralen Unternehmensbereichen. Darüber hinaus bietet die Anwendung auch Funktionen für branchenspezifische Prozesse, die nach Bedarf aktiviert werden können. Dadurch bleibt sie im Kern langfristig stabil und kann eine maximale Systemleistung erbringen.
- SAP Product Lifecycle Management (SAP PLM) verwaltet, überwacht und steuert sämtliche Produktinformationen über den Lebenszyklus von Produkten und Anlagen, sowohl im eigenen Unternehmen als auch in der erweiterten Wertschöpfungskette. Da organisatorische Hindernisse dank SAP PLM abgebaut werden, entsteht im Produktentwicklungsprozess mehr Freiraum für Kreativität.
- SAP Supplier Relationship Management (SAP SRM) unterstützt Unternehmen bei ihren zentralen Aufgaben in der Beschaffung. Die Anwendung bietet Funktionen für eine bedarfsorientierte Suche nach Lieferanten, ein zentralisiertes Vertragsmanagement, die operative Beschaffung sowie verschiedene Kanäle für die Interaktion mit Lieferanten. SAP SRM hilft Unternehmen, den gesamten Prozess von der Beschaffung bis zur Zahlung schneller abzuwickeln und zu optimieren. Möglich wird dies durch integrierte Prozesse und Funktionen, die eine strikte Einhaltung von Verträgen sicherstellen und dadurch zu deutlichen Kosteneinsparungen führen können.
- SAP Supply Chain Management (SAP SCM) schafft die Voraussetzungen dafür, dass Unternehmen ihre Lieferprozesse besser an ein dynamisches Wettbewerbsumfeld anpassen können. Mit der Anwendung lassen sich klassische lineare Lieferketten mit hintereinandergeschalteten Prozessen in offene, anpassungs- und reaktionsfähige Logistiknetzwerke umwandeln. Dadurch können Unternehmen schneller auf die Dynamik von Angebot und Nachfrage im globalen Umfeld reagieren.

##### Branchenlösungen

Wir bieten zielgerichtete Lösungsportfolios mit durchgängigen Geschäftsprozessen, die den Anforderungen in verschiedenen Branchen gerecht werden. Sie schaffen spürbaren Mehrwert in der Geschäftsabwicklung und der IT-Landschaft – sowohl in einzelnen Funktionsbereichen als auch im gesamten Unternehmen. Unsere Lösungsportfolios sind speziell auf die nachfolgenden Hauptbranchen zugeschnitten. Daneben umfassen sie auch Lösungen für zahlreiche Teilbranchen.

---

## Verbraucherindustrie

- Konsumgüter
- Handel
- Großhandel

## Finanzdienstleistungen

- Banken
- Versicherungen

## Fertigungsindustrie

- Luft- und Raumfahrt
- Automobilbau
- Bauwirtschaft, Anlagen- und Schiffbau
- Hightech und Elektronik
- Maschinen-, Geräte- und Komponentenbau

## Prozessindustrie

- Chemie
- Life Sciences
- Metall, Holz und Papier
- Bergbau
- Öl und Gas

## Öffentlicher Sektor

- Innere und äußere Sicherheit
- Gesundheitswesen
- Hochschulen und Forschungseinrichtungen
- Öffentliche Verwaltung

## Dienstleistungen

- Medien
- Beratungs- und Fachdienstleistungen
- Telekommunikation
- Transport und Logistik
- Versorgungswirtschaft

## Lösungen für nachhaltige Unternehmensführung

SAP bemüht sich nicht nur selbst stetig um ein nachhaltigeres Wirtschaften. Auch für unsere Kunden bieten wir eine breite Palette an Softwarelösungen, um sie bei der Umsetzung einer nachhaltigen Unternehmensstrategie zu unterstützen. Daher sind Nachhaltigkeitslösungen ein wichtiges Element unserer Produktstrategie. 2010 stärkten wir unsere Marktposition mit der Übernahme von TechniData. TechniData ist ein führender Anbieter von Lösungen für Compliance Management und langjähriger Entwicklungs- und Servicepartner der SAP. Durch die Übernahme können wir mehr Inhalte und strategische Services im Bereich Nachhaltigkeit anbieten und so den Anforderungen unserer Kunden gerecht werden. Damit verfügen wir nun über ein ganzheitliches und integriertes Portfolio an Nachhaltigkeitslösungen, mit denen unsere Kunden Nachhaltigkeitsinitiativen umsetzen, ihren Erfolg messen und

entsprechende Berichte erstellen können. Die Lösungen sorgen für eine schnelle Wertschöpfung bei den Kunden.

Zu unserem Portfolio gehören folgende Lösungen:

- Mit SAP Advanced Metering Infrastructure Integration for Utilities können Energieversorger die vielen verschiedenen Geschäftsprozesse mit ihren Kunden, sei es die Verbrauchserfassung oder die Abrechnung, in einem integrierten System abwickeln. So optimieren sie Umsatz und Nachfrage, schaffen die Voraussetzungen für einen kosteneffizienteren Kundenservice, erhöhen die Markteffizienz und automatisieren den Datenaustausch in den neu entstandenen Netzwerken von Energieversorgern und Infrastrukturbetreibern.
- Mit SAP BusinessObjects Sustainability Performance Management können Unternehmen leichter Nachhaltigkeitsziele festlegen, ihre Nachhaltigkeitsleistung messen und in Berichten darstellen. Die Anwendung trägt auch dazu bei, die Kosten für die Datenerfassung und die Fehlerquote zu reduzieren.
- SAP Carbon Impact (SAP CI) unterstützt Unternehmen dabei, Treibhausgasemissionen und andere Umweltfaktoren intern und in ihrer gesamten Logistikkette genau zu erfassen und kosteneffizient zu senken. Die On-Demand-Lösung stellt auch fundierte Daten für Berichte zur Verfügung.
- SAP Environmental Health and Safety Management (SAP EHS) sorgt in Unternehmen für die Einhaltung gesetzlicher Vorschriften. Mit einem integrierten Konzept für alle Aspekte des Compliance- und Risikomanagements hilft die Anwendung Unternehmen, Auflagen effizient einzuhalten und ihre Mitarbeiter und Betriebsstätten zu schützen.
- Mit der Anwendung SAP Manufacturing Integration and Intelligence (SAP MII) und ihren Funktionen und Informationen können Unternehmen Möglichkeiten für Energieeinsparungen in der Fertigung erkennen und weiterverfolgen.

## Duet und Alloy

Business User brauchen bei ihrer täglichen Arbeit Zugang zu Menschen, Prozessen und Informationen. Dabei wollen sie weder auf vertraute Anwendungen verzichten noch mit komplexer Software umgehen. Die Lösungen Duet und Alloy bieten direkten Zugriff auf die Anwendungen der SAP Business Suite über die gewohnte Umgebung von Microsoft Office und IBM Lotus Notes. Dadurch können Business User ihre Produktivität erhöhen, besser Entscheidungen treffen und Unternehmensrichtlinien leichter einhalten.

---

## Lösungen für den Mittelstand

SAP bietet ein Lösungsportfolio speziell für kleine und mittlere Unternehmen, das neben Funktionen für das Tagesgeschäft auch Business-Intelligence-Anwendungen enthält. Wie Großunternehmen suchen auch diese Betriebe nach Möglichkeiten, ihre Geschäftsprozesse zu straffen, Kosten zu senken, Wachstum zu generieren und ihre Profitabilität zu erhöhen. Daneben möchten sie ihren Cashflow optimieren und die richtigen Informationen zum richtigen Zeitpunkt im gesamten Unternehmen zur Hand haben.

### **SAP Business All-in-One**

SAP-Business-All-in-One-Lösungen richten sich an mittelgroße Unternehmen oder kleine, schnell wachsende Betriebe mit 100 bis 2.500 Mitarbeitern, die eine umfassende integrierte Branchenlösung für ihre Geschäftsabwicklung benötigen. Die Software enthält integrierte branchenspezifische Best Practices sowie Business-Intelligence-Funktionen. SAP Business All-in-One vereint Anwendungen für unterschiedlichste Unternehmensfunktionen: von Finanzbuchhaltung, Personalwirtschaft, Einkauf und Bestandsmanagement über Fertigungsprozesse, Logistik und Produktentwicklung bis hin zu Vertrieb und Marketing. In allen größeren Märkten (in über 50 Ländern) haben Kunden auch die Wahl zwischen einer On-Premise-Installation oder einer Hostinglösung, die über qualifizierte Partner auf Subskriptionsbasis zur Verfügung gestellt wird.

Ein umfassendes Netz von qualifizierten SAP-Partnern bietet rund 700 branchenspezifische SAP-Business-All-in-One-Lösungen in über 50 Ländern an. Für die Lösungen wurden spezielle Werkzeuge und Methoden entwickelt, sodass sie sich nicht nur schnell implementieren lassen, sondern auch kostengünstig im Betrieb sind und sich daher schnell amortisieren.

### **SAP Business One**

SAP Business One ist speziell für kleinere Unternehmen mit bis zu 100 Mitarbeitern konzipiert, deren Buchhaltungssoftware an Grenzen stößt und die ihre Abläufe mit einer zentralen, einheitlichen Lösung optimieren wollen. Die Anwendung deckt praktisch das gesamte Geschäft ab – von den Finanzen und den Beständen über den operativen Betrieb bis hin zum Vertrieb und zu den Kundenbeziehungen. Integrierte Business-Intelligence-Funktionen sorgen dabei für Transparenz über alle Geschäftsprozesse. Kleine Unternehmen erhalten durchgängige, optimierte Geschäftsabläufe und verfügen über präzise Informationen. Damit können sie ihre Effizienz steigern und schneller profitab-

les Wachstum erzielen. Ein Softwareentwicklungskit (SDK) sowie die branchenspezifischen Lösungen und Funktionserweiterungen aus dem globalen Partnernetz sorgen zudem dafür, dass SAP Business One an spezielle Prozesse und Anforderungen angepasst werden kann.

## **Business-Analytics-Lösungen**

### **SAP-BusinessObjects-Portfolio**

Das SAP-BusinessObjects-Portfolio enthält analytische Anwendungen, die sich speziell an Business User richten und die Ausrichtung an den strategischen Zielen, vorhersagbare Ergebnisse und fundierte Entscheidungen unterstützen. Anwendungen für Business Intelligence und Enterprise Information Management sorgen dafür, dass Unternehmen jedem Mitglied eines Geschäftsnetzwerks zuverlässige Informationen zur Verfügung stellen können. So sind sie in der Lage, schnell zu reagieren und zeitnah Entscheidungen auf einer soliden Grundlage zu treffen.

Das SAP-BusinessObjects-Portfolio umfasst auch Lösungen für Enterprise Performance Management und Governance, Risk und Compliance. Kunden haben damit die Möglichkeit, ihre Profitabilität zu steigern, das Risiko- und Compliance-Management zu steuern sowie Systeme und Prozesse zu optimieren. SAP steht für Offenheit und Interoperabilität in heterogenen Softwarelandschaften. Deshalb können die Lösungen sowohl mit Datenquellen oder Systemen verknüpft werden, die nicht auf SAP basieren, als auch mit Anwendungen der SAP Business Suite und mit SAP-BusinessObjects-Lösungen.

SAP-BusinessObjects-Lösungen für Business Intelligence (BI) sind so konzipiert, dass auch Endbenutzer mit Geschäftsdaten umgehen und Ad-hoc-Anfragen beantworten können, ohne tiefere Kenntnis der zugrunde liegenden Datenquellen zu besitzen. Die Lösungen können im On-Demand-Betrieb genutzt oder bei Kunden vor Ort installiert werden. Sie helfen ihnen, Daten aus verschiedenen Quellen und in unterschiedlichen Formaten abzurufen und diese in Form von übersichtlichen und zweckmäßigen Informationseinheiten bereitzustellen. Mithilfe der BI-Software können Kunden Trends und Muster aufdecken, Geschäftsprobleme lösen, Veränderungen rechtzeitig erkennen und gezielt auf ihre Unternehmensziele hinarbeiten.

---

SAP-BusinessObjects-Lösungen für Enterprise Information Management (EIM) unterstützen Kunden bei der Datenintegration, der Gewährleistung der Datenqualität und der Verwaltung von Metadaten. So entsteht zusammen mit den EIM-Funktionen der Technologieplattform SAP NetWeaver eine zuverlässige Datenbasis, die für geschäftliche und IT-Maßnahmen genutzt werden kann. Kunden können strukturierte und unstrukturierte Daten abrufen, integrieren, verschieben oder bereinigen und dadurch zeitnah einheitliche Informationen zur Verfügung stellen.

SAP-BusinessObjects-Lösungen für Enterprise Performance Management (EPM) helfen Unternehmen dabei, ihre Geschäftsergebnisse zu kontrollieren, flexibel zu agieren und bessere Entscheidungen zu treffen. Sie sind für verschiedene Unternehmensbereiche konzipiert, darunter das Finanzwesen, das Lieferkettenmanagement und die Beschaffung. Das EPM-Portfolio umfasst Anwendungen für Strategiemangement, Planung, Budgeterstellung und Prognosen sowie Konsolidierung. Auch das Rentabilitäts- und Kostenmanagement, das Ausgabenmanagement und die Kontrolle der Lieferkette sind abgedeckt.

SAP-BusinessObjects-Lösungen für Governance, Risk und Compliance (GRC) unterstützen Unternehmen bei der Einhaltung von gesetzlichen Vorschriften, Richtlinien zur Unternehmensführung und beim Risikomanagement. Sie können alle GRC-Aktivitäten in heterogenen Umgebungen in Echtzeit überblicken und proaktiv steuern.

Darüber hinaus bietet SAP verschiedene analytische Anwendungen für spezielle Branchen und Geschäftsbereiche. Die Anwendungen entstanden in Zusammenarbeit mit Kunden und sind in nahezu jeder Umgebung einsetzbar. Sie stellen Unternehmen Best Practices und detaillierte Geschäftsdaten zur Verfügung, damit diese Risiken besser verstehen, Geschäftsmöglichkeiten erkennen und wirtschaftlich sinnvolle Entscheidungen treffen können. Sie sind schnell einsatzbereit, für nahezu jedes IT-System geeignet und bieten eine schnelle Wertschöpfung.

SAP-Crystal-Lösungen sind ein integriertes und benutzerfreundliches Gesamtangebot für die Erstellung von Berichten, Ad-hoc-Analysen und die Datenpräsentation. Das Paket umfasst interaktive grafische Darstellungen wichtiger Unternehmensdaten (Dashboards). Mit SAP-Crystal-Lösungen

verfügen Unternehmen und ihre Mitarbeiter über aussagekräftige und aktuelle Geschäftsdaten, die sie gemeinsam bearbeiten können. Dies schafft die Voraussetzungen für eine bessere Entscheidungsfindung.

Mit den verschiedenen Komponenten des SAP-Crystal-Portfolios können Anwender interaktive Berichte erstellen, diese über viele verschiedene Kooperationsplattformen anzeigen und austauschen und flash-basierte, interaktive Datendarstellungen aus Microsoft Excel erzeugen. Für technisch versierte Geschäftsanwender stellt die Software Funktionen für Ad-hoc-Abfragen und -Analysen in einer Self-Service-Umgebung zur Verfügung.

SAP-BusinessObjects-Edge-Lösungen sind vielseitige Business-Intelligence- und Enterprise-Performance-Management-Lösungen für Mittelstandsunternehmen. Sie bieten verschiedene Funktionen – von flexiblen Ad-hoc-Berichten und Analysen über Datendarstellungen per Dashboard bis hin zu Funktionen für Datenintegration und Datenqualitätsmanagement. Darüber hinaus unterstützen sie Unternehmen bei der Optimierung ihrer Budgetplanung und Konsolidierung sowie beim Strategiemangement.

#### **Analytische Angebote von Sybase**

Sybase IQ ist ein hochoptimierter Analyseserver, der die Verarbeitungsgeschwindigkeit von geschäftskritischen Business-Intelligence-, Analytics-, Berichts- und Data-Warehousing-Lösungen erhöht. Mit Sybase IQ können Abfragen schnell beantwortet und strukturierte wie unstrukturierte Daten effizient gespeichert werden. Dadurch ist der Server sowohl für Datamarts als auch für Data-Warehouse-Implementierungen hervorragend geeignet. Mit seiner spaltenbasierten Struktur für die Datenspeicherung verbindet Sybase IQ ein schnelles Verarbeitungstempo und Flexibilität mit niedrigen Gesamtkosten. Er schafft damit in Unternehmen die Grundlage für Analysen und die Berichterstellung.

Sybase RAP – The Trading Edition ist eine zentrale Plattform für Marktanalysen, mit der Finanzdienstleister sichere und bessere Trading- und Portfolioentscheidungen in allen Phasen des Handels treffen können. Sie erfüllt anspruchsvolle analytische Anforderungen – von der Entwicklung von Modellen bis hin zu Handels- und Risikoanalysen in Echtzeit und historischen quantitativen Analysen, die mehrere Jahre einbeziehen. Sybase RAP – The Trading Edition bietet eine einheitliche

---

Sicht auf Daten und sorgt für eine schnelle Datenverfügbarkeit. Möglich wird dies durch eine zentrale Plattform, auf deren Daten verschiedene Nutzergruppen, darunter Analysten, Trader und Risikomanager, gemeinsam Zugriff haben.

Sybase Replication Server bewegt und synchronisiert Daten in Echtzeit. Unternehmen können dadurch Daten, die isoliert in Anwendungen lagern, besser nutzen und Berichte erstellen, ohne dass die operativen Systeme beeinträchtigt werden. Sybase Replication Server ist bei vielen der vom US-amerikanischen Wirtschaftsmagazin Fortune gelisteten 1.000 umsatzstärksten Unternehmen im Einsatz. Datenbankadministratoren können damit nach Ausfällen schnell zusätzliche Ablagen für die Wiederherstellung von Daten einrichten. Darüber hinaus lassen sich Daten über verschiedene Plattformen (darunter Sybase ASE, Sybase IQ, Oracle, IBM DB2 und Microsoft SQL Server) verteilen, konsolidieren und synchronisieren.

Sybase PowerDesigner ist ein Werkzeug für Datenmodellierung und Anwendungsdesign. Es richtet sich an Unternehmen, die Anwendungen schnell und kostengünstig entwickeln oder umgestalten wollen. Durch die Link- und Synchronisierungstechnologie präsentiert sich Sybase PowerDesigner als effektive Lösung zum Aufbau einer Unternehmensarchitektur und bei Veränderungsprozessen in Unternehmen.

Mit Sybase PowerBuilder lassen sich Anwendungen schnell entwickeln. Das Werkzeug trägt damit zu einer höheren Produktivität von Entwicklern bei. Möglich wird dies durch die enge Integration von Design, Modellierung, Entwicklung und Management für verschiedene Plattformen.

#### **SAP High Performance Analytic Appliance (SAP HANA)**

SAP HANA ist ein flexibles, datenquellenunabhängiges In-Memory-Komplettpaket aus optimierten SAP-Softwarekomponenten und Hardware von SAP-Partnern. Mit SAP HANA können Unternehmen unmittelbare Analysen ihrer Geschäftstätigkeit durchführen. Hierbei greifen sie auf große Mengen an detaillierten Transaktions- und Analysedaten zurück, die aus nahezu jeder beliebigen Datenquelle stammen können. SAP HANA revolutioniert den Zugriff auf Daten und bildet auch die Grundlage für die Entwicklung neuer, innovativer Anwendungen. Die Anwendungen nutzen die In-Memory-Datenbank und

die Berechnungsfunktionen in SAP HANA, sodass Kunden komplexe Planungen, Prognosen und Simulationen auf der Basis von Echtzeitdaten durchführen können.

#### **On-Demand-Lösungen**

##### **SAP Business ByDesign**

SAP Business ByDesign ist eine der derzeit modernsten On-Demand-Lösungen und -Plattformen der Branche. Sie richtet sich vorwiegend an kleine und mittelgroße Unternehmen, die die Vorteile umfassender integrierter Unternehmensanwendungen nutzen wollen, ohne jedoch eine komplexe IT-Infrastruktur zu betreiben. SAP Business ByDesign ist so konzipiert, dass sowohl kunden- und partnerspezifische Erweiterungen als auch Änderungen an der Benutzeroberfläche und an den vorgegebenen Berichten und Formularen möglich sind. Inzwischen hat SAP auch mit Großunternehmen, die SAP Business ByDesign in ihren Tochtergesellschaften einsetzen möchten, erste Verträge abgeschlossen.

Die Lösung setzt Best-Practice-Prozesse für Finanzwesen, Kundenbeziehungsmanagement, Projektmanagement, Personalwirtschaft, Beschaffung und Lieferketten ein. Integrierte Analysefunktionen auf Basis von In-Memory-Technologie ermöglichen Unternehmen schnelle und fundierte Entscheidungen. Auch auf mobilen Endgeräten ist die Lösung abrufbar. SAP Business ByDesign schafft die Voraussetzungen für Zusammenarbeit im Unternehmen und trägt zu Produktivitätssteigerungen bei. Damit soll die Lösung Kunden helfen, effizienter bei allen Geschäftsaktivitäten zu arbeiten. Durch eine einheitliche Benutzeroberfläche, personalisierte Portale für die einzelnen Mitarbeiter und integrierte Hilfen kann die Lösung auch zur Senkung der softwarebezogenen Schulungs- und Supportkosten beitragen.

Mit Starterpaketen, bei denen es sich um vorkonfigurierte Teilbereiche der kompletten SAP-Business-ByDesign-Lösung handelt, können Kunden schnell und kostengünstig auf spezielle Funktionsanforderungen und betriebswirtschaftliche Problemstellungen eingehen. Die Pakete sind zum Festpreis erhältlich und lassen sich schnell einführen. Mit speziellen Implementierungsverfahren sowie integriertem E-Learning können sie je nach Anforderungen des Kunden in nur drei Wochen eingeführt werden.



---

SAP Business ByDesign wird in externen Rechenzentren von SAP-Experten betrieben, gewartet und überwacht. Integrierte Service- und Supportleistungen ermöglichen zudem, dass Einführung und Betrieb reibungslos und zu vorhersehbaren Kosten verlaufen. Die SAP erweitert derzeit ihr Partnernetz für SAP Business ByDesign. Bereits über 100 Partner verkaufen die Lösung oder bieten zusätzliche Serviceleistungen, Funktionen und Erweiterungen dafür an, die die speziellen Anforderungen einzelner Kunden oder Branchen berücksichtigen.

#### **SAP BusinessObjects BI OnDemand**

SAP BusinessObjects BI OnDemand ist eine umfassende Business-Intelligence-Lösung, die Anwender innerhalb weniger Minuten einsetzen können. Sie ist als Software-as-a-Service-Lösung erhältlich und kann kostenlos getestet werden. Durch die intuitiv bedienbare Benutzeroberfläche können Business User Daten einfach finden, austauschen und daraus Berichte erstellen. Die Lösung lässt sich in den meisten Fällen schnell und ohne ein kompliziertes Implementierungsprojekt einführen. Sie bietet sicheren Zugang zu jeweils aktuellen Daten und hilft Mitarbeitern, Kunden und Partnern in allen Bereichen des Unternehmens zeitnahe Entscheidungen zu treffen, die durch fundierte Daten untermauert sind. Angebote für spezielle Branchen und Unternehmen sind über SAP-Partner erhältlich.

#### **On-Demand-Lösungen für einzelne Geschäftsbereiche**

SAP bietet auch verschiedene On-Demand-Lösungen an, die Anwendern in einzelnen Geschäftsbereichen zusätzliche Funktionen zur Verfügung stellen. Die Lösungen enthalten bestimmte Funktionalitäten, beispielsweise Analysefunktionen, für die speziellen Anforderungen dieser Geschäftsbereiche. Zum On-Demand-Portfolio für einzelne Geschäftsbereiche gehören unter anderem folgende Lösungen:

- SAP Sourcing OnDemand: Große Unternehmen stehen unter ständigem Druck, ihre Profitabilität zu verbessern. Deshalb suchen sie nach Möglichkeiten für Kosteneinsparungen auch bei der Beschaffung von Waren und Dienstleistungen. SAP Sourcing OnDemand unterstützt sie hierbei mit Prozessen für die strategische Bezugsquellsuche sowie das Vertrags- und Lieferantenmanagement. Die Lösung strafft die Prozesse im Zusammenhang mit der Vertragserstellung, Verhandlungen und Vertragsänderungen. Gleichzeitig hilft sie Unternehmen bei der komplexen Suche nach Lieferanten, deren Qualifizierung und Bewertung.
- SAP Contract Lifecycle Management OnDemand: Mit der Vertragsmanagementsoftware der SAP können Einkäufer

Verträge auf der Grundlage einer zentralen Vertragsdatenbank erstellen, verhandeln und verwalten. Beispielsweise können sie eine Bibliothek mit Standardverträgen und Vertragsklauseln anlegen und damit sicherstellen, dass rechtliche Standards bei der Erstellung von Verträgen eingehalten werden. Die Software bietet auch Funktionen für das Ein- und Auschecken, das Hervorheben von Änderungen und den Vergleich von Versionen.

- SAP Supplier Management OnDemand: Mit der Anwendung für das Lieferantenmanagement können Unternehmen ein zentrales Lieferantenverzeichnis für die Suche nach Bezugsquellen und die Vertragserstellung anlegen. Auch Kennzahlen und Scorecards zur Messung der Lieferantenleistung lassen sich in der Anwendung festlegen.
- SAP Carbon Impact OnDemand hilft Unternehmen, ihren Energieverbrauch und die Kohlendioxidemissionen in allen Bereichen des eigenen Betriebs sowie in ihrer Produktlieferkette zu reduzieren. Mit der Lösung können weltweit tätige Unternehmen äußerst kostengünstig Berichte und Analysen zu ihrem gesamten Stromverbrauch und ihren Treibhausgasemissionen erstellen. Gleichzeitig wird es mit der Software möglich, die Maßnahmen zur Senkung des CO<sub>2</sub>-Ausstoßes immer wieder anzupassen, je nachdem, wie sich das Marktumfeld mit seinen schwankenden Energiepreisen und immer strengeren Vorschriften (zum Beispiel die Vorschrift zur Erfassung und Meldung von Treibhausgasen der US-amerikanischen Umweltschutzbehörde EPA) entwickelt.

#### **SAP StreamWork**

SAP StreamWork ist eine Anwendung, die die Zusammenarbeit bei Entscheidungen unterstützt. Sie bringt die richtigen Mitarbeiter miteinander in Kontakt und unterstützt sie mit Informationen und bewährten Arbeitskonzepten. So kommen sie schneller zu konkreten Ergebnissen. Teammitglieder innerhalb und außerhalb des Unternehmens können in einem geschlossenen Online-Arbeitsumfeld kommunizieren. Dort können sie Strategien entwickeln, Probleme lösen, Entscheidungen treffen und Aktivitäten verfolgen, um zu einem späteren Zeitpunkt wieder darauf zurückzukommen. Die Lösung stellt vorkonfigurierte, interaktive Werkzeuge zur Verfügung, mit denen sich beispielsweise Tagesordnungen erstellen und Kosten-Nutzen-Analysen und Abstimmungen durchführen lassen. Teammitglieder können ihre Diskussionen damit gestalten und leichter zu einem Konsens kommen.

---

SAP StreamWork ist für Unternehmen jeder Größe und Branche und auch für einzelne Geschäftsbereiche geeignet. Als On-Demand-Anwendung kann SAP StreamWork bei Bedarf genutzt werden und ist innerhalb weniger Minuten einsatzbereit.

## **Technologie**

### **SAP NetWeaver**

Die Technologieplattform SAP NetWeaver ist die Grundlage für die Anwendungen der SAP Business Suite, für die SAP-BusinessObjects-Lösungen und andere SAP-Software. Unternehmen können damit On-Premise-, On-Demand- und On-Device-Geschäftsprozesse aufeinander abstimmen und optimieren. Als technisches Fundament für die service-orientierte Architektur bietet SAP NetWeaver zudem zahlreiche modulare Funktionen, die heterogene IT-Landschaften flexibler machen und ihre Komplexität reduzieren.

Durch die kontinuierlichen Investitionen der SAP in SAP NetWeaver ermöglicht die Plattform anders als herkömmliche Middleware auch ein umfassendes Zusammenspiel von Geschäftsanwendungen – unabhängig davon, ob sie in den Unternehmen vor Ort, über das Internet oder auf Mobilgeräten betrieben und genutzt werden. Das Konzept dieser sogenannten Orchestrierung beginnt bei so wichtigen Bereichen wie der Anwendungsarchitektur, den Produkt- und Technologiestandards sowie der Integrität von Prozessen, Informationen und Schnittstellen. Es umfasst aber auch geschäftskritische Aufgaben wie das Management von Geschäftsprozessen, von Stammdaten und des Lebenszyklus von Anwendungen.

Die Plattform SAP NetWeaver und das Technologieportfolio von SAP BusinessObjects schaffen die technische Grundlage für die Orchestrierung von Anwendungen. Als Infrastrukturlösung für SAP-Geschäftsanwendungen bieten sie unter anderem Funktionen zur Verbesserung der Teamproduktivität sowie zur Prozess- und zur Anwendungsintegration und schließen die Lücke zwischen analytischen Auswertungen und entsprechenden operativen Maßnahmen.

### **Sybase Adaptive Server Enterprise**

Sybase Adaptive Server Enterprise (ASE) ist ein leistungsstarkes Datenbankmanagementsystem für unternehmenskritische, datenintensive Umgebungen. Es bietet niedrige Gesamtbetriebskosten bei hoher Zuverlässigkeit, Sicherheit und Skalierbarkeit. Zu den wichtigsten Funktionen von ASE gehören

Verschlüsselungs-, Partitionierungs- und Abfragetechnologien für „intelligentere“ Transaktionen sowie die ständige Verfügbarkeit in Cluster-Umgebungen. Durch die Integration der In-Memory-Datenbanktechnologie in ASE 15.5 können Daten virtualisiert und Skalierungen realisiert werden, wie sie für hohe Datenvolumina und viele gleichzeitig aktive Nutzer erforderlich sind. Dabei spielt es keine Rolle, ob ASE in öffentlichen Cloud-Umgebungen oder in privaten Rechenzentren eingesetzt wird.

## **On-Device-Lösungen**

### **Mobile Anwendungen der SAP**

Die Zahl der Mitarbeiter, die bei ihrer Arbeit vorwiegend Mobilgeräte nutzen, nimmt exponentiell zu – ähnlich wie die Zahl und Vielfalt der mobilen Endgeräte. Man geht davon aus, dass bis 2013 ein Drittel der weltweit arbeitenden Bevölkerung (nach einer Prognose des Marktforschungsunternehmens IDC) bei ihrer Arbeit auf mobile Endgeräte angewiesen sein wird. Vor diesem Hintergrund müssen mobile Technologien, Betriebssysteme und Anwendungen mit der Nachfrage nach benutzerfreundlichen, leistungsstarken und kostengünstigen Konzepten Schritt halten.

SAP hat bei der Entwicklung des Mobile Computing und der mobilen Kommunikation eine Führungsrolle übernommen. Unser Ziel ist es, unseren Kunden ein vollständiges Angebot für die mobile Geschäftsabwicklung zur Verfügung zu stellen, das von Geschäftsprozessen über Plattformen und Entwicklungswerkzeuge bis zu Anwendungen reicht. Durch die standardmäßige Anbindung an SAP-Software bietet unsere Mobiltechnologie zu jedem Zeitpunkt, an jedem Ort und auf verschiedenen Geräten sicheren Zugriff auf Geschäftsprozesse. Unsere Strategie für die mobile Geschäftsabwicklung zielt darauf ab, den Einsatz, die Reichweite und den Nutzen von SAP-Lösungen zu vergrößern. Hierfür wollen wir mehr Anwendungen auf unterschiedlichen Geräteplattformen zur Verfügung stellen und dabei für alle die Anwenderfreundlichkeit gewährleisten, die Kunden erwarten. Unsere Kunden werden dadurch ihre Investitionen in SAP-Produkte noch besser für sich nutzen können.

Zusammen mit unserem neu erworbenen Tochterunternehmen Sybase stellten wir 2010 zwei neue Lösungen für den Einsatz auf mobilen Endgeräten vor. Die Lösungen basieren auf der Sybase Unwired Plattform und sind über iPhone und Windows Mobile abrufbar. Sie erweitern die Workflow-Management-Funktionen der SAP Business Suite, darunter vor allem

---

bei der Anwendung SAP Customer Relationship Management (SAP CRM). Darüber hinaus können sie so konfiguriert werden, dass sie auch auf Datenquellen in nachgelagerten Systemen zugreifen. Durch die nahtlose Anbindung an Geschäftsprozesse und -netzwerke können Mitarbeiter im Außendienst mit den Lösungen ihre Produktivität verbessern und zeitnah Entscheidungen treffen.

Darüber hinaus bietet SAP nun auch anwenderfreundliche mobile Anwendungen wie iPhone-/iPad-Anwendungen für SAP Business ByDesign, SAP Business One und SAP Business Explorer. Durch die mobilen Anwendungen sind Nutzer in Echtzeit mit ihren SAP-Systemen verbunden und können das Tagesgeschäft jederzeit und an jedem Ort weiterführen.

Im Markt für mobile Geschäftslösungen entwickelt SAP gemeinsam mit führenden Anbietern Anwendungen auf zahlreichen Plattformen. Auch das Ökosystem der SAP – ein Netzwerk von SAP-Mitarbeitern, -Partnern, -Kunden und Branchenexperten – spielt eine wichtige Rolle bei der Definition, der Entwicklung und dem Verkauf von Mobilprodukten und Serviceleistungen, die spezielle Kundenanforderungen berücksichtigen. Der Schwerpunkt der SAP-Entwicklungsarbeit wird auch weiterhin auf praktischen, anwenderfreundlichen Softwarelösungen liegen, die sich schnell einführen lassen und damit unmittelbaren Mehrwert bieten.

#### **Mobile Lösungen von Sybase**

Mit iAnywhere-Lösungen (iAS) können Unternehmen ihren Mitarbeitern, die mit mobilen Endgeräten arbeiten, zu einer größeren Produktivität verhelfen. Die Lösungen sind weltweit marktführend beim Management von Mobilgeräten, beim drahtlosen E-Mail-Verkehr, bei mobilen Middleware-Plattformen, beim Zugriff auf Datenbanken, bei der Synchronisierung sowie bei Bluetooth- und Infrarotprotokoll-Technologien.

Als Plattform für mobile Unternehmenslösungen sorgt Sybase Unwired Platform dafür, dass Unternehmen strategische Mobilösungen kostengünstiger einsetzen können. Mit der Plattform lassen sich mobile Unternehmensanwendungen einfacher entwickeln, implementieren und steuern. Gleichzeitig löst Sybase Unwired Platform die Probleme, die sich beim Einsatz von mobilen Anwendungen stellen. Hierzu gehören die Anbindung an das Backoffice, ein sicherer Zugriff von mobilen Endgeräten auf die Unternehmenssysteme sowie die Unterstützung

für zahlreiche Gerätetypen. Dabei verwendet Sybase eine zuverlässige Push-Architektur für die Datensynchronisation.

SQL Anywhere ist eine führende eingebettete Mobillösung für das Datenmanagement und die Datensynchronisierung in mobilen Umgebungen. Informationen, die in Unternehmenssystemen und -anwendungen lagern, können damit ohne eigenen IT-Support für Datenbanken in Mobilumgebungen zugänglich gemacht werden. Diese Datenbankfunktionen sind leicht zu integrieren und werden in zahlreichen Server-, Desktop-, Remote-Office- und mobilen Anwendungsumgebungen genutzt.

Mit Afaria können Unternehmen ihre mobilen Endgeräte zentral steuern und deren Sicherheit gewährleisten. Die Lösung sorgt für die Bereitstellung, Konfiguration und Sicherheit von Geräten. Gleichzeitig können damit Softwarelösungen, Inhalte und Daten während der gesamten Lebensdauer des Gerätes implementiert und verwaltet werden. Afaria unterstützt zahlreiche mobile Endgeräte, darunter Handhelds, Smartphones, Laptops und Tablet-PCs.

Mit iAnywhere Mobile Office lassen sich persönliche Daten, E-Mails und Geschäftsprozesse sicher auf Mobilgeräten zur Verfügung stellen. Die Lösung verbindet Infrastruktursupport mit hoher Sicherheit, Anwenderfreundlichkeit und Leistungsfähigkeit von Mobilgeräten. Sie bietet wichtige Funktionen für die „mobile Inbox der Zukunft“ von Unternehmen. Zeitkritische Aufgaben, wie das Genehmigen von Bestellungen oder das Einreichen von Berichten, können damit über einen zentralen und sicheren mobilen E-Mail-Client durchgeführt werden.

Advantage Database ist eine leistungsstarke und einfach integrierbare Client-Server-Datenbank. Sie verfügt über einen kompletten Funktionsumfang und ist ideal für kleine und mittelgroße IT-Umgebungen. Innerhalb des Datenbankangebots von Sybase zeichnet sie sich dadurch aus, dass sie auch für alte Datenbank Anwendungen, die in Sprachen wie Delphi und FoxPro geschrieben wurden, Möglichkeiten für den Umstieg auf den heute verwendeten Code bietet.

Mobile Device SDKs sind standardbasierte Softwareentwicklungskits, mit denen sich Protokolle für Infrarot-Kommunikation, Bluetooth-Technologie, Datensynchronisierung und Gerätemanagement in Mobilgeräte integrieren lassen.

---

## Serviceportfolio der SAP

Das Serviceportfolio der SAP umfasst Services für generische und branchenspezifische Lösungen sowie für Änderungen der Prozess- und IT-Landschaft in Unternehmen. Darüber hinaus bieten wir auch Serviceleistungen für kundenspezifische Entwicklungen, Supportleistungen, Unterstützung beim Programm- und Projektmanagement und bei der Qualitätssicherung sowie Schulungen und Zertifizierungen an.

Unter softwarebezogene Services fallen neben der kundenspezifischen Entwicklung durch SAP Custom Development die Supportleistungen, die die SAP-Supporteinheiten von SAP Active Global Support erbringen. Die Beratungs- und Schulungsservices werden von SAP Consulting und SAP Education erbracht.

Die SAP verfügt mit dem Application Lifecycle Management über einen ganzheitlichen Ansatz für das Management von IT-Lösungen. Zusammen mit zertifizierten Partnern bieten wir eine breite Palette an Methoden, Werkzeugen und Serviceangeboten, um die Geschäftsanforderungen unserer Kunden zu erfüllen und ihnen zu helfen, von ihren Investitionen in SAP-Lösungen zu profitieren. Unsere Services sorgen für ein lückenloses Risiko- und Qualitätsmanagement über die gesamte Dauer der Kundenbeziehung. Gleichzeitig entsteht durch die enge Verknüpfung zwischen unserem Entwicklungs- und Servicebereich ein geschlossener Feedback-Kreislauf für unsere Kunden.

SAP Services ist in mehr als 50 Ländern vertreten und betreibt über 70 Schulungszentren, sieben Global-Support-Zentren und zehn Kundenentwicklungszentren in Europa, Nord- und Südamerika sowie Asien. Mit rund 21.000 Mitarbeitern steht SAP Services unseren Kunden weltweit rund um die Uhr zur Verfügung.

## Softwarebezogene Services

### SAP Custom Development

SAP Custom Development entwickelt kundenspezifische Lösungen und Geschäftsprozesse auf Basis der SAP-Technologie und bietet Entwicklungs- und Supportservices für jede Phase im Lebenszyklus dieser Lösungen.

## Supportservices

Durch verschiedene Supportangebote unterstützt SAP die immer komplexeren Lösungslandschaften und entsprechen den Anforderungen der Kunden. Die Supporteinheiten der SAP betreuen Kunden vor, während und nach der Implementierung unserer Softwarelösungen. Rund um die Uhr steht in jeder Region technischer Support für die Lösung von Kundenproblemen zur Verfügung. Daneben umfasst unser Angebot proaktive, präventive Leistungen, um die Investitionen unserer Kunden in SAP-Technologie und -Software zu schützen.

Im Rahmen von SAP Enterprise Support bieten wir umfassende, proaktive Support- und Wartungsleistungen für den gesamten Lebenszyklus von Anwendungen. Damit helfen wir Kunden, die zunehmende Komplexität ihrer IT-Umgebungen zu beherrschen und Lösungen nahtlos in ihre IT-Landschaften zu integrieren. Die meisten unserer Kunden entscheiden sich für SAP Enterprise Support. Das Serviceangebot liefert ein Gesamtkonzept, um Kunden bei der Optimierung ihres gesamten Systembetriebs zu helfen. Für geschäftskritische Prozesse bieten wir laufende Qualitätsprüfungen, um technische Risiken zu analysieren, sowie Updates. Darüber hinaus steht SAP-Kunden und -Partnern mit dem SAP Solution Manager eine zentrale Plattform für das Anwendungsmanagement zur Verfügung. Der SAP Solution Manager umfasst Qualitätsmanagementmethoden, Prozesse und Werkzeuge, um umfassende Tests sowie Maßnahmen in den Bereichen Lösungsimplementierung, Betrieb und kontinuierliche Optimierung durchzuführen.

SAP Standard Support sorgt mit Supportleistungen für einen kontinuierlichen und effektiven IT-Betrieb. Kunden erhalten im Rahmen dieses Basis-Supportangebots Serviceleistungen und Werkzeuge, mit denen sie die Kosten für den dauerhaften Betrieb ihrer IT-Systeme und die damit verbundenen Risiken so niedrig wie möglich halten können. Dies gilt auch für Updates. Mit Verbesserungen, Qualitätsmanagement, Wissenstransfer und Problemlösungen stellt SAP Standard Support sicher, dass SAP-Lösungen bei den Kunden möglichst effizient laufen.

Unser Supportangebot SAP MaxAttention stellt eine Erweiterung von SAP Enterprise Support dar und bietet Kunden eine individuell auf sie zugeschnittene Betreuung für alle Phasen ihrer SAP-Lösung, von der Planung und Implementierung bis zum Betrieb und zur Optimierung. Eine breite Palette

---

von Services hilft Unternehmen, komplexe IT-Lösungen zu schützen, neue Versionen und Upgrades zu planen und ihre produktiven Lösungen stetig zu optimieren. Die Leistungen im Rahmen von SAP MaxAttention werden von der Organisation SAP Active Global Support erbracht. Sie bieten unseren Kunden das höchstmögliche Supportniveau auf der Grundlage eines speziellen Kooperationskonzepts mit einem technischen Serviceberater und Service-Level-Vereinbarungen sowie langfristiger Zusammenarbeit.

SAP Safeguarding hilft unseren Kunden, die technischen Risiken einer Implementierung, eines Integrations-, Migrations- oder Upgradeprojekts zu mindern, um so einen reibungslosen Produktivstart und einen zuverlässigen Lösungsbetrieb zu ermöglichen. Ein technischer Qualitätsmanager vor Ort stellt sicher, dass Kunden die erforderliche Unterstützung erhalten, ein Wissenstransfer stattfindet und unsere Kunden die Leistung, Datenkonsistenz und Verfügbarkeit ihrer SAP-Lösung verbessern können.

### **Beratungs-, Schulungs- und sonstige Services**

#### **Beratung**

SAP Consulting bietet branchenbezogene Beratungsleistungen für die Planung, Implementierung und Optimierung von Unternehmenssoftware.

Mit den Business Transformation Services haben wir Premium-Beratungsleistungen konzipiert, die unsere Kunden dabei unterstützen, IT- und Geschäftsprozesse in Einklang zu bringen und dadurch besseren Einblick in ihr Unternehmen zu gewinnen. So können sie schneller auf neue Herausforderungen in einem schnelllebigen Marktumfeld reagieren. Zu diesen Leistungen zählen unter anderem Executive Advisory Services, Value Partnerships sowie Business Process and Platform Services. IT Transformation Services verfolgen das Ziel, die IT-Gesamtkosten beim Kunden zu senken und dabei eine deutliche Wertschöpfung für den Kunden, verbunden mit reduziertem Arbeitsaufwand und geringeren Kosten, zu erreichen.

Mit neuen Services zur Optimierung von Performance und Transparenz in Unternehmen führen wir im Zusammenhang mit der Einführung innovativer Geschäftsprozesse komplexe Analysen durch und zeigen die damit verbundenen Herausforderungen für das Unternehmen auf. Wir beraten Kunden bei der Gestaltung von Geschäftsprozessen und der

IT-Infrastruktur, beim Projektmanagement sowie bei der Lösungsimplementierung und Integration. Darüber hinaus unterstützen wir unsere Kunden bei Anpassungen von Lösungs- und IT-Landschaften an neue Anforderungen, die sich aus Fusionen und Übernahmen oder der Ausgliederung von Geschäftsbereichen ergeben. Zusätzlich bieten wir auch vorab definierte standardisierte SAP-Services, die branchengängige Verfahren und bewährte Geschäftsprozesse umsetzen. Die Services, die mit klar umrissenen Kosten und Leistungen unseren Kunden eine schnelle Wertschöpfung bieten, erleichtern den Einsatz von SAP-Lösungen.

#### **Schulung**

Das Leistungsangebot von SAP Education vermittelt SAP-Kunden und Partnern Wissen über SAP-Produkte. Hierzu gehören verschiedene Schulungsangebote wie E-Learning, live über das Internet übertragene Veranstaltungen (Virtual Live Classroom Training), Learning-on-Demand und Präsenzveranstaltungen ebenso wie Analysen des Schulungsbedarfs, Zertifizierungen und Lernsoftware. Unsere Schulungsprogramme sind weltweit standardisiert. Jedes Jahr schult SAP Education Hunderttausende von Personen und ist somit eine der weltweit größten IT-Schulungsorganisationen.

#### **Serviceportfolio von Sybase**

Das Servicekonzept von Sybase sieht vor, dass alle Leistungen im umfassenden Serviceportfolio rund um die Uhr zur Verfügung stehen. Die Services sorgen für die Interoperabilität von Messaging-Diensten und die Bereitstellung von Inhalten. Auch Geschäfte können damit über Mobiltelefone erledigt werden. Sie richten sich an Mobilfunkbetreiber, Anbieter von redaktionellen Beiträgen und Inhalten, Unternehmen und Finanzinstitute.

Sybase schafft die Voraussetzungen für die Informationsbereitstellung und Geschäftsabwicklung über mobile Endgeräte und ist hierbei weltweit führend. Dabei löst Sybase die komplexen Problemstellungen der drahtlosen Kommunikation (Inkompatibilität von Netzen, Messaging-Protokollen, Mobilfunkgeräten und Verrechnungssystemen) und bietet seinen Kunden modernste mobile Dienstleistungen.

#### **Mobile Services von Sybase**

Sybase 365 sorgt mit Services für Mobilfunkanbieter weltweit für die Interoperabilität bei der Nachrichtenübermittlung im Bereich SMS (Short Message Service), MMS (Multimedia Mes-

---

sage Service), GPRS Roaming Exchange (GRX) und Internet Protocol Exchange (IPX). Die Nachrichten werden über eine sichere Messaging-Plattform für Mobilfunkbetreiber übertragen. Dabei kommen moderne Funktionen für die Protokollkonvertierung, das Routing, Queuing und die Transkodierung zum Einsatz. Mit den Interoperabilitätsservices wird die Nachrichtenübermittlung zwischen Mobilfunkbetreibern über inkompatible Netzwerke, Protokollstacks und Mobilfunkgeräte deutlich einfacher. Zu den Services gehören auch Analysen des Datenverkehrs sowie detaillierte Berichte und Statistiken.

Enterprise Services bieten mobile Services für Unternehmen sowie Marken- und Content-Anbieter. Kunden können damit hochwertige Inhalte gewinnbringend positionieren und interaktive Services, CRM-, Werbe- und Marketingkampagnen weltweit über mobile Endgeräte zustellen. Zu den Services gehört MMS 365, eine Zustellungsplattform zum Senden und Empfangen von MMS-Inhalten aus unterschiedlichen Quellen. Das Angebot umfasst darüber hinaus Services für das Management von Anwendungen und Inhalten sowie für Werbekampagnen, Fakturierung, Abrechnung, Berichte und Analysen per Handy.

mCommerce Services bieten auf etablierten und neuen Märkten durchgängige Lösungen für mobile kommerzielle Dienste in den Bereichen Banking (mBanking), Zahlungsabwicklung (mPayments) und Überweisungen (mRemittance). Dank seiner führenden Messaging-Plattform und einer weltweiten Abdeckung (SMS, MMS) schafft Sybase damit hervorragende Voraussetzungen, damit Mobilfunkanbieter, Finanzdienstleister und Unternehmen die Möglichkeiten des mCommerce optimal für sich nutzen können.

### **Supportservices von Sybase**

Der Sybase-Geschäftsbereich für Kundenservice und Support bietet technische Supportleistungen für die Sybase-Produktfamilien. Sybase betreibt regionale Supportzentren in Nord- und Lateinamerika, Europa und Asien, die weltweit Kunden und Partner ununterbrochen mit technischen Serviceleistungen unterstützen. Auf der Support-Internetseite von Sybase haben Endanwender und Partner Zugriff auf Softwarekorrekturen, technische Informationen und Newsgroups. Die Supportprogramme von Sybase umfassen Updates und neue Versionen, die während des Wartungszeitraums auf den Markt kommen.

Im Rahmen des Sybase Standard Support bietet Sybase hochwertige Supportleistungen rund um die Uhr bei Problemen sowie Zugriff auf neue Versionen und Online-Supportservices.

Sybase Enterprise Support unterstützt Unternehmen bei geschäftskritischen Projekten mit personalisierten Supportleistungen, die auch eine hohe Verfügbarkeit des Supportpersonals gewährleisten. Kunden genießen bei Problemen eine bevorzugte Behandlung durch die Mitarbeiter des technischen Supports, erhalten proaktive Services sowie andere Sonderoptionen. Bei diesem Supportangebot werden Anfragen mit höchster Priorität und möglichst kurzer Reaktionszeit bearbeitet.

Darüber hinaus bietet Sybase sowohl Partnern als auch Anwendern einige spezielle Supportserviceprogramme für bestimmte Workplace-, Werkzeug- und iAS-Produkte an.

Sybase 365 betreibt zwei Network Operations Centers, die die Infrastruktur für Messaging Services überwachen, die weltweiten Instandhaltungs- und Reparaturaktivitäten steuern und Sybase-Kunden rund um die Uhr technischen Support bieten.

### **Beratungs- und Schulungsservices von Sybase**

#### **Beratung**

Über die Organisation Sybase Professional Services (SPS) erhalten Kunden umfassende Beratungs-, Schulungs- und Integrationsleistungen. Damit können sie ihre Lösungslandschaften aus Sybase-Produkten und Produkten anderer Hersteller optimieren.

#### **Schulung**

Sybase bietet ein umfangreiches Schulungsprogramm, mit dem Kunden und Partner ihre Kenntnisse in Bezug auf Sybase-Produkte vertiefen können. In den Schulungszentren von Sybase werden Kurse für Anfänger und Fortgeschrittene angeboten. Auch spezielle Schulungen für einzelne Kunden und Kurse, bei denen das Lerntempo selbst bestimmt werden kann, sind möglich. Darüber hinaus bieten auch verschiedene Sybase-Vertriebspartner und autorisierte Schulungsanbieter Kurse für Sybase-Produkte an.

---

## KUNDEN

SAP hilft Unternehmen dabei, ihre Potenziale bestmöglich zu nutzen. Ob es um eine stärkere Wettbewerbsposition, mehr Innovationsfähigkeit und Kundenorientierung oder den erfolgreichen Unternehmenswandel geht: Unser Ziel ist es, jeden Kunden auf dem Weg zum Best-run Business zu unterstützen. Um die nötigen Voraussetzungen für Wachstum und Effizienzsteigerungen zu schaffen, investieren unsere Kunden weiterhin in Software. SAP hat derzeit über 109.000 Kunden (über 75 % davon sind mittelgroße und kleine Unternehmen) in mehr als 120 Ländern.

2010 schlossen wir 37 % mehr Verträge ab als im Vorjahr. Dies entspricht rund 270 Verträgen pro Tag. Nachfolgend eine Auswahl:

### Region Europa, Naher Osten, Afrika

- Achmea, das größte Versicherungsunternehmen der Niederlande, will derzeit seine Geschäftsarchitektur auf kundenindividuell anpassbare Standardprodukte umstellen und künftig mehrere Vertriebswege gleichzeitig nutzen. Um seine Versicherungsprozesse – von der Akquise über das Policen- und Schadenmanagement bis hin zum Controlling und zur Finanzbuchhaltung – durchgängig abzudecken, entschied sich Achmea für SAP for Insurance sowie SAP-BusinessObjects- und SAP-CRM-Software.
- British Gas versorgt Millionen Kunden in Großbritannien mit Gas und Strom. Zum Angebotsspektrum des Versorgungsunternehmens gehören auch Reparaturleistungen für Privathaushalte. British Gas plant die Reintegration von Verbrauchablesungen ins eigene Unternehmen und möchte dafür einen neuen Geschäftsbereich namens British Gas Smart Energy (BGSE) schaffen. Um den Umstieg auf intelligente Zählertechnik zu ermöglichen und bei Kundenkontakten die Cross-Selling-Möglichkeiten zu verbessern, erwarb der Energieversorger verschiedene Lösungen der SAP.
- Mark Two Distributors, ein führender britischer Vertreiber von Küchen- und Badartikeln, setzte die Lösung SAP Business All-in-One ein, um für seine Einzelhandelspartner individuelle Mikro-Websites zu gestalten. Die von Mark Two entwickelten und verwalteten Mikro-Websites stehen Interessenten als Informationsquelle zur Verfügung. Diese können sich dort Produktbilder und Beschreibungen ansehen, Daten über die Produktverfügbarkeit abrufen, Beratung von Fachleuten per E-Mail oder Telefon anfordern und Bestellungen nahezu in Echtzeit verfolgen.
- Pražská energetika (PRE), ein wichtiger tschechischer Stromversorger mit Sitz in Prag, setzt auf SAP Customer Relationship Management und die Abrechnungslösung SAP Billing for Utilities, um auf dem kürzlich liberalisierten tschechischen Strommarkt wettbewerbsfähig zu bleiben. Mit den Lösungen der SAP will PRE seine Vertriebsprozesse effizienter gestalten und Transparenz bezüglich Kundenprozessen und -daten schaffen.
- Der britische Nahrungsmittelkonzern Premier Foods stellt unterschiedliche Produktkategorien von Brot über Kekse und Konserven bis hin zu Fertiggerichten und gekühlten Desserts her. Premier Foods setzte seine Investitionen in SAP-Produkte fort und investierte in ERP-Kernanwendungen sowie in Software für das Promotion Management und die Logistikplanung. Der Nahrungsmittelkonzern will damit eine einheitliche strategische Ausrichtung erreichen und die Effizienz im gesamten Unternehmen erhöhen.
- Der russische Triebwerkshersteller für die Raumfahrt-industrie Proton-Perm Motors (Proton-PM) entschied sich für SAP ERP und SAP ERP Human Capital Management, da seine bisherigen IT-Systeme die aktuellen Anforderungen nicht mehr erfüllen konnten. Mit den neuen SAP-Systemen optimierte Proton-PM seine Produktionsplanung und schuf Transparenz hinsichtlich der Ressourcenauslastung und Rentabilität.
- Roth Industries ist eine globale Gruppe mittelständischer Betriebe, die in den Bereichen Haustechnik, Kunststofftechnik und Maschinenbau tätig sind. Das deutsche Unternehmen mit Sitz im hessischen Dautphetal führte die Anwendung SAP BusinessObjects Global Trade Services in drei seiner Betriebe innerhalb von nur zehn Tagen ein. Hintergrund war das elektronische ATLAS-Ausfuhrverfahren in Deutschland, das elektronische Ausfuhranmeldungen für den Zoll seit Juli 2009 zwingend vorschreibt. Die Software richtet sich an mittelständische Unternehmen und unterstützt die Kommunikation mit Zollbehörden. Roth Industries kann damit sicherstellen, dass die entsprechenden Gesetze, Vorschriften und ATLAS-Protokolle eingehalten werden.
- Der Talanx-Konzern, die drittgrößte Versicherungsgruppe in Deutschland, wird die Anwendung SAP Policy Management einführen. Die Gruppe will damit die Sparten Schaden und Unfall bei ihren Tochtergesellschaften HDI-Gerling Firmen und Privat Versicherung AG sowie HDI Direkt Versicherung AG vereinheitlichen. Von der Neugestaltung seiner Policenverwaltung mit SAP-Software verspricht sich Talanx ein effiziente-



---

res Policenmanagement und einen besseren Kundenservice. Auch neue Versicherungsprodukte sollen dadurch schneller auf den Markt kommen.

### **Region Amerika**

- ANSES (Administración Nacional de la Seguridad Social) ist in Argentinien für die Verwaltung der öffentlichen Altersversorgungs- und Pensionsfonds, Familienzulagen für Arbeitnehmer, Familienbeihilfen für Pensionäre und der Arbeitslosen-gelder zuständig. ANSES entschied sich für SAP Public Sector, die Lösung für öffentliche Verwaltungen. Ziel ist es dabei, die administrativen Prozesse zu optimieren, die Datenqualität zu verbessern und schneller Entscheidungen treffen zu können.
- El Palacio de Hierro ist eine mexikanische Warenhauskette, die im gehobenen Segment angesiedelt ist. Um ihre strategischen Ziele umsetzen zu können, benötigte El Palacio de Hierro eine integrierte Geschäftsprozessplattform, die mehr Prozesseffizienz und -effektivität bot. Die Wahl fiel auf das Lösungsportfolio SAP for Retail, das mit klaren Geschäftsprozessen die Wachstumsziele des Unternehmens unterstützt.
- Der Itatiaia-Konzern ist einer der drei größten Möbelhersteller Brasiliens. Das Unternehmen will bis 2014 seinen Ertrag auf 1 Mrd. brasilianische Real (rund 440 Mio. €) steigern. Um dieses Ziel zu erreichen und seine Schlüsselprozesse in Bereichen wie dem Vertrieb und der Materialwirtschaft zu straffen, setzte Itatiaia auf SAP. Von der Einführung der SAP-Software erwartet der Möbelkonzern zuverlässige Daten, eine bessere Entscheidungsfindung und eine vollständige Anbindung an seine bereits vorhandenen softwaregestützten Prozesse.
- O Boticario ist eines der weltweit führenden Franchise-netze im Parfüm- und Kosmetiksektor. Das Unternehmen mit Sitz in Brasilien musste seine Vertriebsleistung optimieren. Erreichen wollte man dies mit einer stärkeren IT-Lösung, die die Strategie von O Boticario für das Warengruppenmanagement umsetzen konnte. Die Anwendung SAP Merchandise and Assortment Planning liefert nun O Boticario die nötigen Informationen, um sicherstellen zu können, dass jeder Laden den passenden Produktmix in den richtigen Mengen erhält.
- 3M, ein Mischkonzern mit Sitz in den USA und eine der weltweit größten Marken, wollte seine globalen Geschäftsprozesse vereinheitlichen und entschied sich für SAP als Softwareanbieter. Im Zuge der Ablösung von Altsystemen an Standorten weltweit führte 3M die neueste Version der SAP Business Suite ein. Durch die Vereinheitlichung seiner IT-Landschaft auf Basis der SAP Business Suite kann das Unternehmen nun die Geschäftsprozesse in einem integrierten Betriebsmodell aufeinander abstimmen und erhält einen besseren Überblick über die weltweiten Aktivitäten.
- Dynamic Paint Products, Kanadas größter Spezialhersteller und -anbieter von Farben, benötigte eine Lösung, die das kontinuierliche Wachstum und die Expansionspläne des Unternehmens – auch für internationale Märkte – unterstützen konnte. Die Wahl fiel auf SAP Business All-in-One. Dynamic Paint Products geht davon aus, dank der bewährten branchenspezifischen Geschäftsverfahren der SAP-Lösung nun bald von einer vollständigen Integration all seiner Systeme profitieren zu können.
- McCain Foods, kanadischer Hersteller von Tiefkühlprodukten wie Pommes frites, Vorspeisen, Pizza, Gemüse, Desserts, Säften, Entrees und Ofengerichten, entschied sich für das Lösungsportfolio SAP for Consumer Products, um seine marktführende Stellung zu festigen. McCain Foods Limited will damit eine durchgängige Integration im gesamten Unternehmen – vom Logistikketten- bis zum Finanzmanagement – erreichen und die Voraussetzungen für schnellere Produktinnovationen schaffen.
- Das amerikanische Konsumgüterunternehmen Newell Rubbermaid benötigte einen vollständigen, präzisen und zeit-nahen Überblick über die Schlüsselkennzahlen des gesamten Unternehmens. Mit Lösungen aus dem SAP-BusinessObjects-Portfolio konnte es diese Daten in einem zentralen Dashboard zusammenfassen. Business User haben einfachen Zugriff auf das Dashboard und können aufgrund konsistenter Infor-mationen zeitnah fundierte Entscheidungen treffen, die sich direkt auf die Unternehmensleistung auswirken.
- Der US-amerikanische Kunde Tellabs, Designer und Her-steller von Telekommunikationsausrüstungen für Telekom-munikationsdienstleister, Kabelnetzbetreiber und Regie-rungsbehörden, kooperierte mit Sybase und SAP, um seine vorhandene ERP-Anwendung für Laptops auf das iPad umzustellen. Sybase Mobile Workflow für SAP Business Suite setzt auf der Sybase Unwired Plattform auf und schafft die Voraussetzungen dafür, dass Tellabs seine vorhandenen SAP-Anwendungen auf mobilen Endgeräten bereitstellen kann. Die Lösungen lassen sich schnell auf verschiedenen Geräte-typen einsetzen und sorgen für schnellere Entscheidungen und eine höhere Kundenzufriedenheit.

- 
- 
- Terasen Gas, ein nordamerikanischer Anbieter integrierter Energielösungen, führt im Zusammenhang mit der Reintegration seines Kundenservice das Paket SAP Customer Relationship Management and Billing for Utilities ein. Mit der SAP-Software hat Terasen einfachen Zugriff auf aktuelle Kundeninformationen aus einer zentralen Datenquelle und verbessert den Überblick über alle Kundenkontakte im Unternehmen.

#### **Region Asien-Pazifik-Japan**

- Die internationale Supermarktkette 7-Eleven stellte in Australien ihre Lieferkette auf Logistikprozesse der SAP um, die auch eine automatisierte Nachschubplanung ermöglichen. In mehr als 90 % der 7-Eleven-Märkte, die alle direkt beliefert werden, wird die Aufstockung der Bestände nun automatisch und zentral gesteuert. Die IT-Landschaft von 7-Eleven basiert auf SAP-Software und bietet damit eine gute Grundlage für die ehrgeizigen Expansionspläne des Unternehmens, das mittelfristig über 200 neue Märkte in Australien eröffnen will.
- Der chinesische Zementproduzent Huaxin Cement konnte mit seiner SAP-ERP-Anwendung sein enormes Wachstum sicher steuern und die Management- und Finanzprozesse in seinen Niederlassungen vereinheitlichen. Damit verfügt Huaxin Cement nun über ein System für die Einkaufsteuerung und konnte die Prozesse rund um den Einkauf und das Bestandsmanagement optimieren.
- Die Fluggesellschaft Malaysia Airlines erreichte mit der Einführung der Anwendung SAP ERP deutlich straffere und effizientere Geschäftsabläufe. Alle Daten sind nun an zentraler Stelle hinterlegt und können zeitnah abgerufen werden. Dadurch kann das Unternehmen Entscheidungen auf einer soliden Grundlage treffen, die Produktivität der Mitarbeiter erhöhen und auch das Cash Management optimieren.
- Die Tan Hiep Phat Beverage Group (THP), der größte Hersteller und Vertreiber von Getränken in Vietnam, implementierte SAP-Software in allen Geschäftsbereichen, darunter auch in den Getränke- und Verpackungswerken des Unternehmens. THP kann als integrierte Einheit nun effizienter agieren und Daten präziser analysieren. Zudem können Entscheidungen, die wichtig für den Geschäftserfolg sind, deutlich schneller getroffen werden. THP sieht den strategischen Produktfahrplan der SAP für seine Branche als zentrales Element seiner Wachstumsstrategie.

## FORSCHUNG UND ENTWICKLUNG

Um die Kraft der Vielfalt für sich zu nutzen und gleichzeitig regionale und globale Märkte optimal zu bedienen, entwickelt die SAP ihre Software in strategisch wichtigen Ländern weltweit. Hierzu gehören Brasilien, China, Deutschland, Indien, die USA und weitere wichtige Regionen. Zusammen mit Partnern, Kunden und Universitäten arbeiten die internationalen Forschungs- und Entwicklungszentren der SAP an der Erschließung richtungsweisender IT-Trends und Technologien. Diese Kooperation trägt wesentlich zu unserer technologischen Vorreiterrolle bei.

### Globale Präsenz in Forschung und Entwicklung

Die Entwicklungszentren der SAP, die SAP Labs, sind weltweit verteilt. Das größte dieser SAP Labs befindet sich am Firmensitz in Walldorf, gefolgt von den Labs in Bangalore, im kalifornischen Palo Alto, in Schanghai und in Vancouver. Die Entwicklungsstandards und Leistungskennzahlen in allen Labs entsprechen einem gemeinsamen, nach ISO 9001: 2000 zertifizierten Qualitätsmanagementsystem. Die Forschungszentren von SAP Research sind jeweils einer Partneruniversität oder einem SAP-Entwicklungszentrum angegliedert, was eine effektive Zusammenarbeit und gemeinsame Forschungsprojekte ermöglicht. Mit der Übernahme von Sybase im August 2010 kamen hoch qualifizierte Spezialisten hinzu, die neues Wissen und unterschiedliche kulturelle Sichtweisen in die SAP-Entwicklungslösung einbringen.

Durch die weltweite Verteilung der SAP-Forschung und Entwicklung können wir schnell auf neue Kunden- und Marktanforderungen reagieren. Unsere globale Präsenz ermöglicht es uns außerdem, Produkte und Services zusammen mit Kunden und Partnern auf der ganzen Welt zu entwickeln. 2010 haben wir neue Entwicklungsmethoden eingeführt und unsere Organisationsstruktur in der Entwicklung angepasst, um uns noch stärker auf die Bedürfnisse der Kunden auszurichten und kundenorientierte Innovationen schneller auf den Markt zu bringen.

### Ressourceneinsatz in Forschung und Entwicklung

Unsere derzeit führende Stellung im Markt für betriebswirtschaftliche Unternehmenssoftware können wir nur halten, wenn wir unser Produktportfolio permanent weiterentwickeln. Unsere Forschungs- und Entwicklungskosten betrugen 2010 1.729 Mio. € und sind damit gegenüber dem Vorjahr (1.591 Mio. €)

um 138 Mio. € gestiegen – dies entspricht 9 %. Die F&E-Quote, also der Anteil der Forschungs- und Entwicklungskosten am Gesamtumsatz, betrug im Geschäftsjahr 2010 13,9 % (2009: 14,9 %). Die Forschungsintensität, das ist der Anteil der Forschungs- und Entwicklungskosten an den operativen Aufwendungen, hat sich gegenüber dem Vorjahr von 19,7 % auf 17,5 % vermindert – ohne die Aufwendungen im Zusammenhang mit dem TomorrowNow-Rechtsstreit würde sich die Forschungsintensität auf Vorjahresniveau befinden.

### Forschungs- und Entwicklungskosten

Mio. € | Veränderung zum Vorjahr

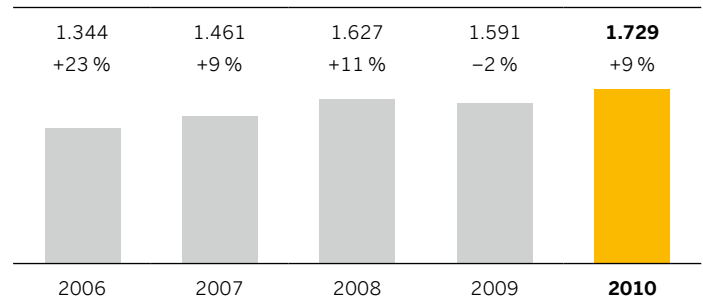

Die hohe Bedeutung von Forschung und Entwicklung spiegelt sich auch in der Personalstruktur wider. Ende 2010 arbeiteten auf Basis von Vollzeitbeschäftigten 15.884 SAP-Mitarbeiter in diesem Bereich (2009: 14.814). Dies entspricht einem prozentualen Anteil von 30 % (2009: 31 %) an der Gesamtzahl der Mitarbeiter im Konzern. Neben den Personalaufwendungen umfassen die gesamten F&E-Aufwendungen primär auch Kosten für externe Dienstleister sowie Partnerunternehmen, mit denen die SAP bei der Neu- und Weiterentwicklung von Produkten kooperiert. Ferner werden diese Produkte mit externer Unterstützung getestet und zertifiziert. Darüber hinaus fallen Anwaltskosten für die Anmeldung und den Schutz von Patenten sowie für Strategieberatung an. Das Verhältnis der Aufwendungen für externe Dienstleister zu den Personalaufwendungen im F&E-Bereich ist in den letzten Jahren allerdings tendenziell rückläufig gewesen.

## Das globale Forschungs- und Entwicklungsnetzwerk

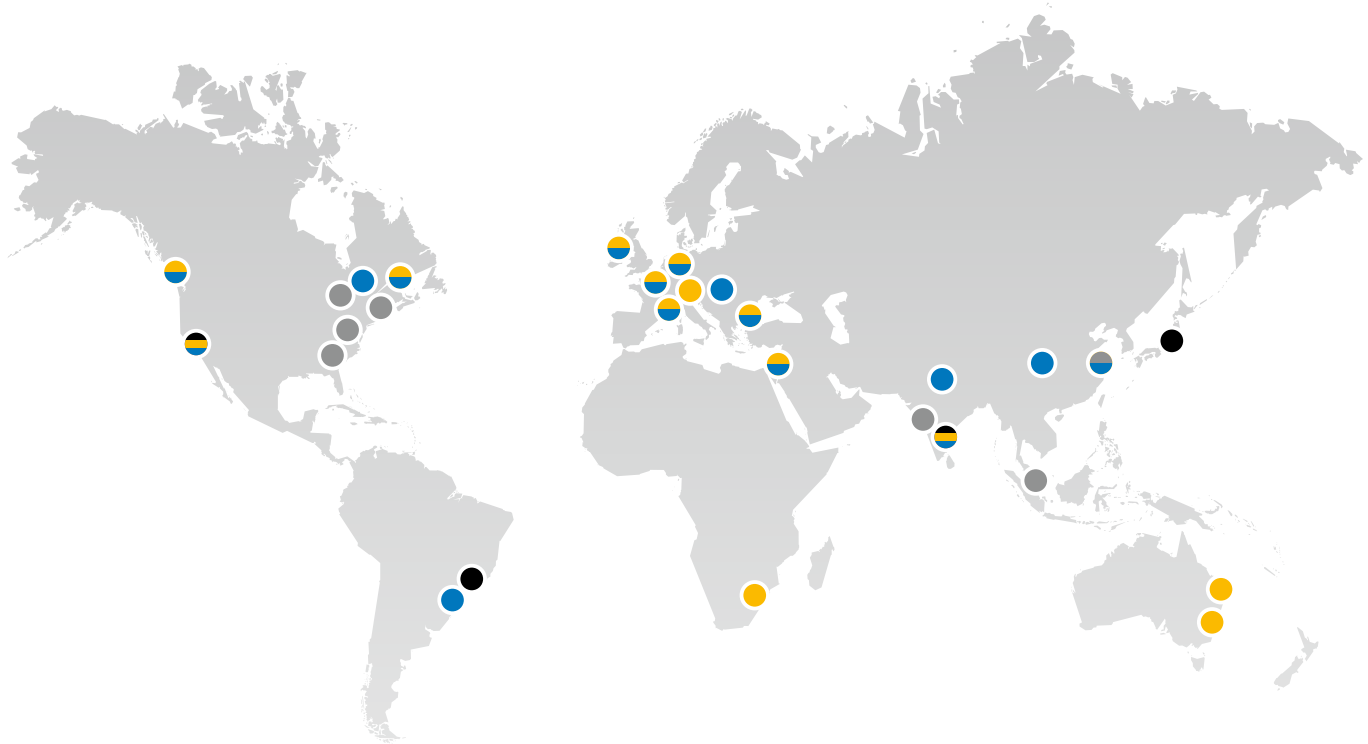

### Entwicklungszentren

- Bangalore & Gurgaon INDIEN
- Budapest UNGARN
- Dublin IRLAND
- Montreal & Toronto KANADA
- Markdorf DEUTSCHLAND
- Palo Alto USA
- Paris FRANKREICH
- Ra'anana ISRAEL
- São Leopoldo BRASILIEN
- Schanghai & Chengdu CHINA
- Sofia BULGARIEN
- Sophia Antipolis FRANKREICH
- Vancouver KANADA
- Walldorf & St. Leon-Rot DEUTSCHLAND

### SAP Research-Standorte

- Bangalore INDIEN
- Belfast VEREINIGTES KÖNIGREICH
- Brisbane AUSTRALIEN
- Darmstadt DEUTSCHLAND
- Dresden DEUTSCHLAND
- Dublin IRLAND
- Karlsruhe DEUTSCHLAND
- Montreal KANADA
- Palo Alto USA
- Paris FRANKREICH
- Pretoria SÜDAFRIKA
- Ra'anana ISRAEL
- Sofia BULGARIEN
- Sophia Antipolis FRANKREICH
- St. Gallen SCHWEIZ
- Sydney AUSTRALIEN
- Vancouver KANADA
- Walldorf DEUTSCHLAND
- Zürich SCHWEIZ

### Co-Innovation Labs

- Bangalore INDIEN
- Palo Alto USA
- Sao Paulo BRASILIEN
- Tokio JAPAN

### Sybase-Forschungs- und -Entwicklungsstandorte

- Alpharette USA
- Concord USA
- Dublin USA
- Pune INDIEN
- Reston USA
- Schanghai CHINA
- Singapur SINGAPUR
- Waterloo KANADA

---

Die Investitionen in Forschung und Entwicklung flossen dabei hauptsächlich in die im Folgenden beschriebenen Bereiche:

## **SAP Research**

### **Ziele und Aufgaben**

Die Erforschung neuer Trends und die Entwicklung zukunftsweisender Ideen und Prototypen sind eine wesentliche Voraussetzung für den Erfolg jedes Technologieunternehmens. Bei der SAP liegt diese Aufgabe in den Händen der globalen Forschungsorganisation SAP Research. Ihr Ziel ist es, IT-Trends aufzuspüren und Entwicklungen, Technologien und Geschäftsmodelle mit potenziell großem Wert für SAP-Kunden zu bewerten. Durch ihre Ergebnisse trägt die SAP-Forschung zur Weiterentwicklung unseres Produktportfolios bei und erstellt innovative Prototypen, die diese Ergebnisse greifbar machen. Zur Unterstützung dieser Ziele ist SAP Research in ein globales Ko-Innovationsnetzwerk eingebunden.

### **Innovationskooperation mit Forschungspartnern**

Um eine solide Basis für gemeinsame Innovation zu schaffen, sind die einzelnen Forschungsstandorte in unmittelbarer Nähe von SAP-Entwicklungszentren oder Universitäten angesiedelt. Systematische Forschung und ein gezieltes Trendmanagement sorgen dafür, dass kreative Ideen in wertvolle Ergebnisse umgesetzt werden können. SAP Research ist in maßgeblicher Funktion an zahlreichen Forschungsprojekten in einem globalen Innovationsnetzwerk beteiligt, zu dem Wissenschaftler und Forschungsinstitute, aber auch SAP-Kunden und -Partner gehören.

### **Living Labs**

Eine Möglichkeit, die Gestaltung von SAP-Produkten aktiv zu beeinflussen, bieten die Living Labs. Hier werden Kunden, Partner und die Produktabteilungen der SAP früh in Forschungsvorhaben eingebunden. Ziel der Living Labs ist es, neue Lösungen mit maximalem Wert für Unternehmen zu entwickeln. SAP Research betreibt drei eigene Living Labs und beteiligt sich an Gemeinschaftsprojekten in den Forschungslaboren seiner Partner.

Ein Beispiel für eine solche Kooperation ist das vom Bundeswirtschaftsministerium geförderte THESEUS- Innovationszentrum in Berlin, das im Juni 2010 eröffnet wurde. Das Zentrum

präsentiert neueste Forschungsergebnisse und zeigt unter Praxisbedingungen Anwendungsszenarien für die Dienstleistungswirtschaft im Internet und das Internet der Zukunft (Future Internet).

### **Next Big Things**

Durch die detaillierte Erkundung verschiedener Geschäftsfelder und Szenarien ist SAP Research in der Lage, jene zukunftsweisenden Technologien und Anwendungen zu definieren, die das größte Wertschöpfungspotenzial aufweisen – sogenannte Next Big Things.

Eines dieser Felder ist das Future Internet, zu dem das Internet der Dinge, das Internet der Dienste, Cloud Computing, soziale Medien und das webbasierte Geschäftsprozessmanagement gehören. Da diese Technologiestufen bereits integriert sind, können die reale Welt und die digitale Welt im Internet der Zukunft noch stärker miteinander verschmelzen. Seine serviceorientierte Struktur unterstützt dynamische und effiziente Prozesse. Doch das Future Internet soll weit darüber hinausgehen, einzelne Dienste (Services) miteinander zu verknüpfen – es schafft vielmehr eine Plattform für die Interaktion von Menschen, Diensten und Objekten in einem globalen Netzwerk.

Was das Future Internet leisten kann, lässt sich gut am folgenden Praxisbeispiel aus der Welt der öffentlichen Sicherheit demonstrieren. Auf der CeBIT 2010 in Hannover präsentierte SAP einen Prototyp für eine Urban-Management-Plattform, die der Sicherung städtischer Lebensräume dient. Am Beispiel einer Sturmfront mit heftigen Unwettern zeigt der Prototyp, wie die Informationstechnologie und das Future Internet die Einsatzkräfte im Katastrophenfall unterstützen können. Durch eine bessere Koordination und Abstimmung der Krisenstäbe ist ein höheres Maß an Sicherheit und Schutz für die Bürger gewährleistet. Außerdem kann eine ununterbrochene Bereitstellung kritischer Funktionen wie Transport, Wasser- und Energieversorgung sowie Gesundheits- und Bildungswesen erreicht werden.

Ein weiterer Anwendungsbereich für das Future Internet ist das Energiemanagement. Der Klimawandel, der stetig steigende Energiebedarf und die Verknappung fossiler Brennstoffe sind wesentliche Herausforderungen der heutigen Gesellschaft. Diese können wir nur bewältigen, indem wir neue Systeme für eine effiziente Energieversorgung entwickeln, die auch die Nutzung von erneuerbaren Energien erlauben. SAP Research beschäf-

---

tigt sich mit modernen Informations- und Kommunikationstechnologien (IKT), die einen wesentlichen Beitrag zur Erreichung dieses Ziels leisten können. So lassen sich mit IKT beispielsweise der Verbrauch und die dezentrale Erzeugung von Energie koordinieren, um so eine Optimierung der gesamten Energieversorgung zu erzielen.

Vor diesem Hintergrund untersuchen SAP Research und seine Partner gemeinsam die Möglichkeiten von Elektrofahrzeugen, Energiemarktplätzen, neuen Geschäftsprozessen für Energielieferanten und andere Entwicklungen in diesem Feld.

#### **Studierende von heute – Leistungsträger von morgen**

Seit seiner Einführung im Jahr 2005 zieht das Doktorandenprogramm von SAP Research kontinuierlich eine Vielzahl qualifizierter Bewerber aus den technischen Disziplinen oder den Wirtschaftswissenschaften an, die in einem praxisnahen Umfeld promovieren möchten. Darüber hinaus bieten die SAP-Forscher in Kooperation mit SAP University Alliances regelmäßig Seminare und Vorlesungen an Universitäten an und beteiligen sich an wissenschaftlichen Konferenzen.

#### **Neue Angebote der SAP**

2010 haben unsere Forschungs- und Entwicklungsteams Innovationen für unser gesamtes Produkt- und Serviceportfolio entwickelt. Unser Schwerpunkt lag darauf, unseren Kunden eine noch größere Auswahl und Funktionsbreite bei On-Premise-, On-Demand- und On-Device-Technologien zu bieten. Mit innovativen Konzepten konnten wir deutliche Verbesserungen bei den Softwareumgebungen unserer Kunden erzielen und eine Orchestrierung ihrer Anwendungen über ihre gesamte jeweilige IT-Landschaft realisieren. Trotz der sich ständig ändernden Anforderungen und Trends im Markt für Unternehmenssoftware bleibt eines konstant: unser Ziel, Wertschöpfung für unsere Kunden zu schaffen und damit einen deutlichen und nachhaltigen Wettbewerbsvorteil für SAP zu erreichen.

#### **On Premise**

##### **Rapid-Deployment-Lösungen**

Mit den SAP Rapid Deployment Solutions brachte die SAP Softwarelösungen auf den Markt, die auf die Bedürfnisse einzelner Geschäftsbereiche zugeschnitten sind und sich in nur zwölf Wochen installieren lassen. Sie umfassen eine Kombination aus Software sowie vordefinierten Services und Inhal-

ten, sind sofort einsatzbereit und zum Festpreis erhältlich. Die ersten verfügbaren Lösungen basieren auf Anwendungen der SAP Business Suite für das Management von Kunden- und Lieferantenbeziehungen sowie für die Steuerung der Unternehmenskommunikation.

#### **Neue Analysepakete im Bereich Nachhaltigkeit**

Um Unternehmen bei der Einhaltung von Umweltschutzaufgaben sowie der Produktsicherheit und dem Arbeitsschutz zu unterstützen, brachten wir neue Komplettpakete mit SAP Best Practices für Nachhaltigkeit auf den Markt. Hierzu gehören die Pakete SAP Best Practices for Analytics in Health and Safety, SAP Best Practices for Analytics in Product Safety and Stewardship sowie SAP Best Practices for Analytics in Environmental Compliance. Mit den neuen Paketen lassen sich operative Analysen durchführen. Verantwortliche in den Bereichen Umwelt-, Gesundheits- und Arbeitsschutz sowie in Produktbereichen erhalten dadurch einen besseren Einblick in zentrale Prozesse und Daten.

#### **Neue Version von SAP Business One**

SAP Business One wird vom Markt sehr gut angenommen und hat inzwischen Tausende Kunden im Segment für kleine und mittelgroße Unternehmen in über 100 Ländern. Nun verfügt SAP Business One zusätzlich über eine verbesserte Benutzeroberfläche und eingebettete Analysefunktionen. Außerdem wurde die Vernetzung mit dem gesamten Geschäftsumfeld vereinfacht. Die neue Version, die in enger Kooperation mit SAP-Partnern entwickelt wurde, bietet eine schnelle Wertschöpfung und lässt sich leicht an das jeweilige Unternehmen anpassen. Darüber hinaus ist sie kostengünstig und einfach zu bedienen.

#### **Neue branchenspezifische Analyseanwendungen**

Innerhalb unseres SAP-BusinessObjects-Portfolios brachten wir neue Analyseanwendungen heraus, die speziell für die heutigen Informationsanforderungen einzelner Branchen und Geschäftsbereiche konzipiert sind. Die BusinessObjects Analytic Applications entstanden in Zusammenarbeit mit Kunden und sind für den Einsatz mit jedem anderen IT-System geeignet. Unternehmen erhalten damit die nötigen Informationen und Best Practices, um Risiken besser zu verstehen, Chancen zu erkennen und profitable Geschäftsentscheidungen zu treffen.

---

## **Best-Practice Templates für Unternehmen der Fertigungsindustrie**

SAP bietet nun auch vorkonfigurierte Best-Practice Templates für die Anwendung SAP Manufacturing Integration and Intelligence (SAP MII) im Bereich Chargenfertigung an. Die vorkonfigurierten Templates unterstützen die Vorbereitung, Durchführung und Dokumentation von Fertigungsprozessen sowie die Erstellung von Berichten. Damit ergänzen sie die Architektur von SAP MII. Die Templates sind das Ergebnis einer erfolgreichen Innovationskooperation, die von der SAP, den SAP-Partnern Ciber, Systec & Services und Trebing + Himstedt sowie mehreren Kunden aus der Fertigungsindustrie unterstützt wurde.

## **On Demand**

### **Neues Angebot im Bereich Nachhaltigkeit**

Im September 2010 stellten wir eine erweiterte Version der Lösung SAP Carbon Impact OnDemand vor. Unternehmen können mit der Lösung ihren Energieverbrauch und die Kohlendioxidemissionen in allen Bereichen des eigenen Betriebs sowie in ihrer globalen Produktlieferkette reduzieren. Dadurch können sie dem wachsenden globalen Druck im Hinblick auf die Senkung ihrer Energiekosten und die Verbesserung ihrer Umweltbilanz begegnen.

### **Neue Version von SAP Sourcing OnDemand**

Um Unternehmen Kosteneinsparungen beim Einkauf von Waren und Dienstleistungen zu ermöglichen, brachten wir eine neue Version der Lösung SAP Sourcing OnDemand auf den Markt. Kunden können mit der Lösung Verbesserungen bei der strategischen Beschaffung erzielen, die Vertragsverwaltung und ihre Lieferantenbeziehungen optimieren. Die neue Version lässt sich reibungslos mit SAP ERP verknüpfen und bietet eine verbesserte Benutzeroberfläche sowie eingebettete Best Practices und On-Demand-Services.

### **SAP BusinessObjects BI OnDemand**

Angesichts der wachsenden Nachfrage nach anwenderfreundlicher Business-Intelligence-(BI-)Software, die über das Internet genutzt werden kann, bieten wir jetzt eine umfangreiche BI-Lösung in einem flexiblen Software-as-a-Service-Modell an. Die Lösung SAP BusinessObjects BI OnDemand richtet sich an Anwender, die nur gelegentlich Business-Intelligence-Funktionen benötigen. Für diese Zielgruppe waren bisher keine speziellen Produkte auf dem Markt. SAP BusinessObjects BI OnDemand

ist leicht zu bedienen, sodass auch Anwender ohne Erfahrung oder spezielle Schulung die Lösung nutzen können. Für die skalierbare Lösung bieten wir abonnementbasierte Preismodelle. So können Kunden die Nutzung einfach und ohne großen Kostenaufwand nach Bedarf erweitern.

## **Entscheidungsfindung in der Cloud**

Die meisten Unternehmen setzen bei ihrer täglichen Arbeit und bei anstehenden Entscheidungen unterschiedliche Softwareanwendungen ein – E-Mail, betriebswirtschaftliche Programme oder Software für die Zusammenarbeit und den Informationsaustausch im Team. Daher laufen Projekte vielfach unkoordiniert ab. Unsere neue On-Demand-Software SAP StreamWork wirkt dem entgegen und unterstützt Teams bei ihrer Entscheidungsfindung in einer sicheren Cloud-Computing-Umgebung. Teammitglieder, die an unterschiedlichen Standorten tätig sind, können damit besser zusammenarbeiten, Feedback einholen und gezielt und ergebnisorientiert arbeiten.

## **Feature Pack für SAP Business ByDesign**

Das neue Feature Pack für die Lösung SAP Business ByDesign enthält wichtige kundenorientierte Neuerungen, darunter In-Memory Analytics für Echtzeitauswertungen sowie eine umfangreiche, individuell anpassbare Benutzeroberfläche. Darüber hinaus ist die Lösung nun auch auf mobilen Endgeräten einsetzbar. Gleichzeitig führten wir drei neue vorkonfigurierte Starterpakete ein, die Kunden als Ausgangspunkt für die Implementierung der kompletten Lösung SAP Business ByDesign einsetzen können.

## **On Device**

### **Größere Reichweite für die SAP Business Suite**

Zusammen mit unserer neu erworbenen Tochtergesellschaft Sybase stellten wir zwei neue Lösungen für den Einsatz auf mobilen Endgeräten vor. Die Lösungen sind über iPhone und Windows Mobile zugänglich. Beide laufen auf der branchenführenden Sybase Unwired Platform und erweitern die Workflow-Management-Funktionen der SAP Business Suite sowie der Anwendung SAP Customer Relationship Management (SAP CRM). Darüber hinaus können sie so konfiguriert werden, dass sie auch auf Datenquellen in nachgelagerten Systemen zugreifen. Durch die nahtlose Anbindung an Geschäftspro-



---

zesse und -netzwerke können Mitarbeiter im Außendienst mit den Lösungen ihre Produktivität verbessern und zeitnah Entscheidungen treffen.

#### **Mobile Anwendungen für kleine und mittelgroße Unternehmen**

Für SAP Business One entwickelten wir eine iPhone-Anwendung, die über den Apple iTunes Store bezogen werden kann. Die mobile Anwendung bietet permanenten Zugriff auf wichtige Daten und Funktionen von SAP Business One und steht Kunden im Rahmen ihres Wartungsvertrags mit SAP zur Verfügung. Auch für SAP Business ByDesign brachten wir eine iPhone-Anwendung auf den Markt. Die Mobilversion der integrierten On-Demand-Lösung für den Mittelstand ist anwenderfreundlich und für alle Kunden von Feature Pack 2.5 für SAP Business ByDesign erhältlich.

#### **SAP Business Analytics und SAP BusinessObjects**

SAP BusinessObjects Mobile bietet über mobile Endgeräte schnellen Zugriff auf Business-Intelligence-Berichte, Kennzahlen und Echtzeitdaten. Dabei handelt es sich um vertraute Berichtsformate, mit denen die Anwender täglich auf ihren Desktop-Computern arbeiten. Daher können sie die Berichte ohne zusätzlichen Schulungsaufwand nutzen und analysieren. SAP BusinessObjects Mobile läuft auf zahlreichen mobilen Endgeräten, darunter BlackBerry, Windows Mobile und Symbian.

#### **SAP BusinessObjects Explorer für iPhone/iPad**

SAP brachte iPad- und iPhone-Versionen für den SAP BusinessObjects Explorer heraus. Sie sind im Apple iTunes Store erhältlich und bieten Kunden komfortablen Zugriff auf Echtzeitdaten.

#### **Orchestrierung**

##### **Neue Version von SAP NetWeaver**

Im Oktober 2010 stellten wir die neue Version der Technologieplattform SAP NetWeaver vor. Zentrale Komponenten der Plattform wurden aktualisiert, um unseren Kunden die Nutzung neuartiger Technologien zu ermöglichen und ihnen den Anschluss an die Innovationsfelder Cloud Computing, Mobilität

und In-Memory Computing zu verschaffen. Die Komponenten SAP NetWeaver Portal, SAP NetWeaver Business Warehouse, SAP NetWeaver Mobile, SAP NetWeaver Process Integration und SAP NetWeaver Composition Environment bieten nun neue und verbesserte Funktionen. Außerdem unterstützt die Plattform Innovationen und Systemaktualisierungen ohne Störung des laufenden Betriebs.

##### **Neue Software für SAP Business All-in-One**

Im März 2010 brachten wir SAP NetWeaver Business Client für Kunden auf den Markt, die SAP-Business-All-in-One-Lösungen im Einsatz haben. Mit der neuen Softwareversion können mittelständische Unternehmen ihre Zusammenarbeit verbessern, Mitarbeiter miteinander vernetzen und Entscheidungen anhand von Echtzeitdaten treffen. An einem zentralen „Arbeitsplatz“ erhalten Anwender einen Überblick über alle wichtigen Unternehmensdaten. Dort stehen ihnen auch Geschäftsanwendungen, Analyselösungen und Webservices zur Verfügung.

##### **SAP High Performance Analytic Appliance (SAP HANA)**

SAP HANA ist ein flexibles, datenquellenunabhängiges In-Memory-Komplettpaket aus optimierten SAP-Softwarekomponenten und Hardware von SAP-Partnern. Mit SAP HANA können Unternehmen ihr Geschäft umgehend analysieren. Hierbei greifen sie auf große Mengen an detaillierten Transaktions- und Analysedaten zurück, die aus nahezu jeder beliebigen Datenquelle stammen können. SAP HANA revolutioniert den Zugriff auf Daten und bildet auch die Grundlage für die Entwicklung neuer, innovativer Anwendungen. Die Anwendungen nutzen die In-Memory-Datenbank und die Berechnungsfunktionen in SAP HANA, sodass Kunden komplexe Planungen, Prognosen und Simulationen auf der Basis von Echtzeitdaten durchführen können.

#### **Services**

##### **Stufenmodell für den Support**

Unseren Kunden steht inzwischen ein umfassendes Stufenmodell für den Support zur Verfügung. Das Supportangebot umfasst SAP Enterprise Support sowie SAP Standard Support.

---

Kunden können somit nach ihrem eigenen Bedarf das passende Supportangebot auswählen. Die überwiegende Mehrheit unserer Kunden setzt dabei auf Enterprise Support. Durch dieses erweiterte Wartungs- und Supportangebot erhalten unsere Kunden bessere Wahlmöglichkeiten, Kalkulationssicherheit und einen höheren Mehrwert.

#### **Neue Entwicklungen im Bereich Service und Support**

Neue Entwicklungen innerhalb unseres Serviceportfolios sollen Unternehmen in erster Linie dabei helfen, Wertschöpfungspotenziale präzise zu ermitteln und zugleich ihre Kosten besser zu kontrollieren. Daher liefern wir vordefinierte Services, damit unsere Kunden die SAP-Lösungen einfacher implementieren und nutzen und gleichzeitig Kosteneinsparungen erzielen können. Auch im Rahmen der SAP Rapid Deployment Solutions erhalten Kunden solche vordefinierten Services. Ein klar umrissenes Softwarepaket kann damit innerhalb von nur zwölf Wochen zu einem Festpreis installiert werden. Die IT Transformation Services der SAP-Serviceorganisation zielen ebenfalls auf eine Senkung der IT-Gesamtbetriebskosten ab.

#### **Neue Sybase-Angebote**

##### **Neue Version von ASE Database**

Mit der neuesten Version von Sybase ASE, einem System zur Verwaltung von Datenbanken, können Unternehmen die hohen Anforderungen an Systemleistung, Effizienz und Servicelevel erfüllen, die an Transaktionsverarbeitungssysteme der nächsten Generation gestellt werden. Die neue Version erhielt die zwei neuen Optionen ASE In-Memory Databases (IMDB) und Advanced Backup Services. Damit kann ASE nun auch künftig in datenintensiven Umgebungen, in denen kurze Antwortzeiten und ein hoher Durchsatz gefragt sind, eine herausragende Leistung und Steuerung bieten.

##### **Neue Wege bei der parallelen Verarbeitung von Analysedaten**

Um der Nachfrage nach Skalierbarkeit, flexibler Architektur und einer hohen Analyseleistung zu begegnen, führten wir Neuerungen beim Sybase IQ 15.3 Analyseserver ein. Mit der PlexQ Distributed Query Platform und einer Architektur, mit der große Datenvolumina parallel verarbeitet werden können, lassen sich hochkomplexe Abfragen schneller durchführen. Möglich wird dies, da die Arbeitslast auf viele Rechner in einer Grid-Konfiguration verteilt wird.

##### **Innovationsmotor für die Kapitalmärkte**

Mit kontinuierlichen Neuerungen für die Kapitalmärkte baut Sybase seine Führung in diesem Bereich weiter aus. Mit der neuen Sybase Liquidity Management Suite (LMS) erhält die weltweite Finanzdienstleistungsbranche vielfältige neue Module zur Unterstützung des relationalen Datenbankmanagementsystems und der Analyseplattform von Sybase.

##### **IP Exchange Services**

Da sich in der Mobility-Branche Internet-Protokolle (IP) als bevorzugte Technologie immer mehr durchsetzen, ist die Nachfrage nach privaten IP-Netzwerken gestiegen, die bei hochwertigen Datentransporten eine hohe technische Leistung in einer sicheren Umgebung gewährleisten. Mit Sybase IPX 365 brachte Sybase nun die erste IP-Exchange-Plattform der Branche auf den Markt, die eine komplette Suite über ein sicheres IP-Netzwerk bietet. Mit der Plattform können Netzbetreiber eine hohe Servicequalität, einen effizienten Betrieb und Kostensenkungen realisieren.

##### **Fortschrittliches Management von Mobilgeräten**

Mit Afaria brachte Sybase eine Lösung für das Management und die Sicherheit von Mobilgeräten heraus, die im Hinblick auf ihre Leistungsstärke und ihren Funktionsumfang führend in der Branche ist. Die Lösung lässt sich für Smartphones und Tablet-PCs einsetzen, die mit den Betriebssystemen iOS 4 und Android arbeiten. Mit Afaria können IT-Abteilungen das komplette Management von Mobilgeräten über ein System abwickeln und dabei interne Sicherheitsstandards präzise einhalten.

##### **Größeres Angebot an Mobile-Commerce-Lösungen**

Mit der Version 3.0 von mBanking 365 ergänzte Sybase sein Angebot an mobilen Lösungen, mit denen Dienste über mobile Endgeräte bereitgestellt werden. Die mobile Banking-Plattform gilt als marktführend und wurde mehrfach ausgezeichnet. Im Rahmen der neuen Version wurde der Funktionsumfang deutlich erweitert und die Implementierung vereinfacht. Finanzinstitute können damit ihren Kunden schneller ein umfassendes Angebot an Banktransaktionen bieten, die über mobile Endgeräte abgewickelt werden können, und so eine höhere Kundenzufriedenheit erreichen.

---

## Patente

Als Marktführer bei Unternehmenssoftware bemühen wir uns aktiv darum, die Rechte am geistigen Eigentum an unseren Innovationen und proprietären Informationen zu schützen. Denn unsere Innovationen dienen dazu, unsere Marktposition als Anbieter von Geschäftslösungen und Services der Weltklasse weiter zu stärken. Aus unseren Investitionen in Forschung und Entwicklung gehen zahlreiche Patentanmeldungen hervor. Allein im Jahr 2010 wurden für SAP weltweit 900 Patente erteilt und validiert. Unser Portfolio umfasst auch Patentfamilien, beispielsweise für die SAP Business Suite, die SAP-BusinessObjects-Produkte und SAP Business ByDesign. Darüber hinaus haben wir im Rahmen der Akquisition von Sybase weltweit auch über 230 erteilte und validierte Patente übernommen.

Das geistige Eigentum der SAP ist zwar wesentlich für unseren Unternehmenserfolg; unser Gesamtgeschäft hängt jedoch nicht von einem bestimmten Patent ab.

---

## PARTNERNETZWERK

Das SAP Ecosystem ist ein Netzwerk aus unterschiedlichen Unternehmen, von Software- und Hardwarepartnern bis hin zu Outsourcing-, Hosting-, Content- und Supportdienstleistern und Schulungsanbietern. Bekannte Anbieter wie Adobe, Cisco, EMC, HP, IBM, Intel, Microsoft, Novell und Research in Motion sind in dieser Innovationsgemeinschaft ebenso vertreten wie Tausende kleinerer Unternehmen. Auch Entwickler, Branchenexperten und SAP-Anwender bilden einen wichtigen Teil des Netzwerks. Die enge Zusammenarbeit mit Partnern ist ein zentraler Bestandteil unserer Strategie und trägt wesentlich dazu bei, unser Leistungsversprechen gegenüber unseren Kunden zu erfüllen. Kunden erhalten über die offene und interaktive Kooperationsgemeinschaft Zugang zu Hardware, Software und Dienstleistungen, die das SAP-Portfolio abrunden und die auf ihre speziellen Anforderungen zugeschnitten sind.

### Partnerschaften fördern Innovation

2010 haben wir unsere Beziehungen weiter vertieft und gemeinsame Projekte unterstützt, die unserer Ansicht nach die Zukunft der Unternehmenssoftware entscheidend mitgestalten werden. Inzwischen arbeiten wir mit 21 globalen Servicepartnern, über 1.700 Servicepartnern weltweit, mehr als 500 Softwarepartnern sowie 29 globalen Technologiepartnern zusammen. Durch unsere Partnerschaften auf lokaler, regionaler und globaler Ebene hat das Angebot an ergänzender Software deutlich zugenommen. Nachfolgend einige Beispiele für Partnerschaften:

- SAP und ClickSoftware Technologies bieten gemeinsam die Anwendung SAP Workforce Scheduling and Optimization by ClickSoftware an. Die über SAP angebotene Lösung unterstützt die Entscheidungsfindung und die Optimierung der Personaleinsatzplanung und hilft so Unternehmen, die Produktivität der Mitarbeiter im mobilen Außendienst sowie die betriebliche Effizienz zu steigern.
- Angesichts einer äußerst erfolgreichen strategischen Partnerschaft unterzeichneten SAP und Open Text eine Vereinbarung, nach der die Open-Text-Lösung zur Verwaltung digitaler Medien künftig von SAP unter dem Namen SAP Digital Asset Management by Open Text angeboten wird. Die Anwendung soll Marketingabteilungen aller Branchen, Medienverlage, Unternehmen der Unterhaltungsindustrie sowie Rundfunkanstalten beim optimalen Einsatz des gesamten Spektrums an Rich Media (Video-, Audioinhalte und Animationen) unterstützen. Im Zuge einer weiteren Intensivierung ihrer strategischen Partnerschaft gaben SAP und Open Text zudem

bekannt, dass SAP Funktionen von Open Text zur Verwaltung von Mitarbeiterdokumenten nutzen wird. SAP vertreibt die Mitarbeiterdatenlösung von Open Text unter dem Namen SAP Employee File Management by Open Text.

- SAP und EMC gaben die Erweiterung ihrer bestehenden Partnerschaft (Global Strategic Alliance) bekannt. Diese umfasst eine Vertriebsvereinbarung, verstärkte Technologieintegration sowie gemeinsame Vertriebs- und Marketingaktivitäten. Im Rahmen der Vereinbarung wird SAP neu entwickelte Softwarelösungen aus den Produktreihen EMC Documentum Enterprise Content Management, EMC Captiva Intelligent Enterprise Capture und EMC Document Sciences Customer Communications Management anbieten. Die Lösungen sollen Finanzdienstleister bei der Automatisierung von Prozessen mit großem Formularaufwand wie der Darlehensanbahnung und -bearbeitung unterstützen.
- Die SAP trieb die Vergrößerung ihres Partnernetzes für die Lösung SAP Business ByDesign weiter voran. Dabei stellt sie Partnern leistungsstarke Werkzeuge zur Verfügung und unterstützt sie bei der Zusammenarbeit mit Kunden. Auf der Grundlage ihrer On-Demand-Lösung sollen Partner ihr Branchenwissen und zusätzliche Funktionen anbieten können, die den Anforderungen eines breiteren Kundenkreises gerecht werden.
- SAP und verschiedene strategische Partner arbeiteten intensiv am Thema Cloud Computing und erzielten zusammen mit Kunden vielversprechende Testergebnisse beim Einsatz von SAP-Software auf der Vblock-Architektur. Im Rahmen der von Cisco, EMC und VMware gebildeten Allianz „Virtual Computing Environment“ (VCE) haben die Partner Vblock-Infrastrukturpakete entwickelt, die sie nun in eine Kooperation mit SAP einbringen. Ziel dieser Initiative ist es, die Vorteile von Virtualisierung – einer neuen Architektur für Rechenzentren, die mehr Flexibilität und Kosteneinsparungen verspricht – zu erschließen.
- Um der wachsenden Nachfrage nach Lösungen im Bereich Governance, Risk und Compliance (GRC) zu begegnen, sind SAP und CA Technologies eine Kooperationspartnerschaft eingegangen. Kunden sollen damit beim Management von Risiken in ihren Geschäftsaktivitäten und IT-Prozessen unterstützt werden. Durch eine Kombination aus Produkten von CA Technologies und führenden GRC-Anwendungen der SAP können unsere Kunden ihre IT-Risiken und Compliance-Maßnahmen besser kontrollieren und sich gleichzeitig auf eine langfristige Wertschöpfung für das Unternehmen konzentrieren.

- 
- SAP und StreamServe vereinbarten, die führende StreamServe-Lösung für Dokumentenautomatisierung ab sofort als Lösungserweiterung von SAP anzubieten. Ziel ist es dabei, die operative Effizienz von Unternehmen und ihre Kommunikation mit Kunden zu verbessern. SAP bietet die StreamServe-Anwendung unter dem Namen SAP Document Presentment by StreamServe an. SAP Document Presentment ist eine innovative Lösung, mit der Dokumente (zum Beispiel Rechnungen) voll automatisch und personalisiert erstellt werden können, und zwar aus mehreren Unternehmensanwendungen heraus und in unterschiedlichen Formaten – sei es als gedrucktes Dokument, als E-Mail, Fax oder als Datei für den mobilen Gebrauch.

### **Innovationsgemeinschaften**

Das SAP Community Network (SCN) stellt Kooperation und die gemeinsame Entwicklung von Innovationen in den Mittelpunkt. Als führendes Beispiel einer Community-Strategie, von der Kunden stark profitieren, findet es zunehmend Beachtung und Anerkennung. So wurde das Community-Netzwerk im März 2010 vom Aspen Institute in einem Bericht mit dem Titel „Leveraging the Talent-Driven Organization“ erwähnt. Der Bericht stellt fest, dass die SAP mit ihrem SAP Community Network als führend beim Einsatz sozialer Medien für die Entwicklung neuer Produkte und Dienstleistungen gilt.

Die verschiedenen Communitys treiben die kontinuierliche Optimierung und Weiterentwicklung von Produkten, Dienstleistungen und Geschäftsprozessen voran. Entwickler, Kunden und Partner tauschen sich unter anderem über die folgenden Communitys im Netzwerk der SAP aus:

- Das SAP Developer Network (SDN) stellt die größte Innovationsgemeinschaft der SAP dar und bietet mehr als zwei Millionen Mitgliedern aus über 200 Ländern die Möglichkeit, Erfahrungen und Know-how auszutauschen, Geschäftsmöglichkeiten weiterzuverfolgen und voneinander zu lernen. Das SDN umfasst Angebote wie Diskussionsforen, Blogs, Wikis, Download-Center mit Software und Werkzeugen sowie E-Learning-Kurse. Mehr als eine halbe Million Nutzer greifen im Monat auf das Netzwerk und eine Vielzahl von technischen Ressourcen zu.
- Die Business Process Expert Community (BPX) ist eine Gemeinschaft zum Thema Prozessoptimierung und zählt mehr als 800.000 Mitglieder aus 18 Branchen, die sich mit unterschiedlichen Querschnittsthemen befassen. Durch die Zusammenarbeit in der Community, den Austausch

von Erfahrungswerten und Weiterbildungsangebote können hier wichtige Impulse für Prozessinnovationen gegeben werden. Zu den Teilnehmern zählen Branchenexperten, Wirtschaftsanalytiker, Anwendungsberater, IT-Manager und Experten für Geschäftsprozesse, denen moderierte Foren, Wikis und Expertenblogs zahlreiche Möglichkeiten zum Ideenaustausch bieten.

- Mit über 500.000 Mitgliedern bietet die SAP BusinessObjects Community ein Forum für Anwender und Entwickler von SAP-BusinessObjects-Lösungen. In der Community können sie Erfahrungen austauschen und Innovationsmöglichkeiten für SAP-BusinessObjects-Produkte weiterverfolgen.
- Die SAP University Alliances Community zählt über 250.000 Mitglieder und hat sich zum Ziel gesetzt, SAP-Wissen und Fertigkeiten aus der Praxis in die Hochschulen zu bringen. Die SAP sieht dies als Teil ihres Engagements für die Ausbildung und Begleitung von Hochschulstudenten und Absolventen auf ihrem Weg zu den Wirtschaftsführern und IT-Experten der Zukunft.

### **Anwendervereinigungen**

Um Praxiswissen und Erfahrungen über SAP-Software auszutauschen und Einfluss auf die Entwicklungsarbeit der SAP zu nehmen, haben sich unsere Kunden weltweit in inzwischen 32 Anwendervereinigungen zusammengeschlossen. Die zwei größten sind die Americas' SAP Users' Group (ASUG) sowie die Deutschsprachige SAP-Anwendergruppe (DSAG). SAP begrüßt und fördert den Wissens- und Erfahrungsaustausch zwischen diesen einflussreichen Gruppen und allen SAP-Anwendern und -Interessierten. Das SAP User Group Executive Network (SUGEN) vereinigt 13 SAP-Anwendergruppen, die gemeinsame Prioritäten und Handlungsbereiche festlegen, um eine gezielte Kommunikation zwischen der SAP und ihren Anwendervereinigungen weltweit zu ermöglichen.

---

## AKQUISITIONEN

Wir verfolgen auch weiterhin unsere Strategie der gezielten Akquisitionen zur funktionalen Erweiterung unseres Portfolios und Unterstützung unseres Hauptziels der technologischen Innovation. Folgende Akquisitionen haben wir 2010 vorgenommen:

- Im Juli übernahmen wir Sybase, ein US-amerikanisches Unternehmen mit Sitz in Dublin, Kalifornien. Sybase bietet zahlreiche Lösungen, um Kundeninformationen sicher zu verarbeiten und mobil zur Verfügung zu stellen. Dazu gehören festinstallierte und mobile Datenbanken, Middleware, Synchronisation, Software für Verschlüsselung und Endgeräte-Verwaltung sowie mobile Messaging-Services. Informationsmanagement-, Analyse- und Mobilitätslösungen von Sybase haben sich in den datenintensivsten Branchen auf allen gängigen Systemen, Netzwerken und Endgeräten bewährt. Mit der Akquisition schaffen wir die Voraussetzung für unsere Vision eines drahtlosen Unternehmens und erhalten die nötigen Technologien, um eine führende Plattform für Mobilanwendungen auf Basis offener Standards zu liefern. Die Plattform kann auf allen großen mobilen Betriebssystemen laufen und alle wesentlichen Endgeräte unterstützen. Gemeinsam bieten SAP und Sybase Kunden eine komplette, optimierte und leistungsstarke Infrastruktur für Datenanalysen. Die SAP Business Suite und andere Lösungen sollen für die Datenmanagement-Server von Sybase portiert, zertifiziert und optimiert werden. Kunden haben dadurch eine größere Auswahl an Datenbankplattformen für ihre SAP-Anwendungen.
- Ebenfalls im Juli übernahmen wir das deutsche Unternehmen TechniData, das schon seit über 15 Jahren ein strategischer Partner der SAP ist. Damit setzen wir unser Engagement fort, Unternehmen bei der Umsetzung ihrer Nachhaltigkeitsstrategien zu unterstützen. TechniData ist führend bei Lösungen für Produktsicherheit sowie Umwelt-, Gesundheits- und Arbeitsschutz (Environment, Health & Safety, EHS). Das Leistungsportfolio von TechniData umfasst Software, Systemintegration, die Durchführung von EHS-Diensten (Managed Services) sowie die Bereitstellung von Daten, um Unternehmen die Einhaltung relevanter gesetzlicher Auflagen zu erleichtern.
- Im Dezember erwarben wir bestimmte Vermögenswerte des deutschen Unternehmens cundus, darunter geistiges

Eigentum und Kundenverträge. Die Transaktion sah auch die Übernahme bestimmter Mitarbeiter vor. Mit dem Kauf der cundus-Lösungen für das Management von Finanzberichterstattungen bauen wir unser Portfolio an Finanzlösungen aus. Unternehmen können mit den Produkten ihre Rechnungslegung termingerecht, präzise, kostengünstig und kontrolliert erstellen. Aufgrund der aktuellen wirtschaftlichen Rahmenbedingungen stehen Unternehmen und deren Finanzabteilungen unter großem Druck, die International Financial Reporting Standards (IFRS) einzuhalten sowie Geschäfts- und Finanzdaten im XBRL-Format (Extensible Business Reporting Language, XBRL) zu veröffentlichen.

- Im Februar 2011 erwarb SAP Software für das Sicherheits-, Identitäts- und Zugriffsmanagement von SECUDE, einem führenden Schweizer Anbieter von Lösungen für Anwendungssicherheit. Erworben wurden zudem auch relevante Vermögenswerte des Unternehmens, darunter Entwicklungs- und Beratungsressourcen. Die SAP wird die Lösungen Secure Login und Enterprise Single Sign-on in ihr Produktportfolio integrieren. SAP-Kunden erhalten damit eine sichere Client-Server-Kommunikation für ihre SAP-Systeme.

### SAP als Risikokapitalgeber

Seit 1996 investiert die SAP in Unternehmen, die zukunfts-trächtige Technologien und Anwendungen entwickeln. Ziel von SAP Ventures ist es, einen fruchtbaren Austausch zwischen den Beteiligungsunternehmen und dem Partner- und Kunden-netz der SAP zu ermöglichen, von dem die jungen innovativen Unternehmen und SAP gleichermaßen profitieren. SAP Ventures investiert weltweit und ist an Unternehmen in Europa, Indien, Mauritius und den USA beteiligt. 2010 investierte SAP Ventures in folgende Unternehmen:

- Spring Wireless ist ein brasilianischer Anbieter durchgängiger Mobilitätslösungen, die Unternehmen und Organisationen zu einer höheren Produktivität, optimierten Echtzeit-abläufen und besseren Ergebnissen verhelfen.
- Aepona ist Pionier und Weltmarktführer bei der Verknüpfung von Cloud Computing und Mobilitätslösungen. Das Unternehmen hat seinen Sitz in Nordirland.

- 
- 
- Splashtop (vormals DeviceVM), ein Privatunternehmen mit Sitz im kalifornischen San José, bietet Softwareprodukte, die das Arbeiten mit Tablet-PCs, Smartphones, Laptops und Netbooks erleichtern.
  - MuleSoft, ein in San Francisco ansässiges Web-Middleware-Unternehmen, entwickelt Unternehmenssoftware für die Integration von On-Premise- und Cloud-Anwendungen.
  - Lavante bietet On-Demand-Lösungen, mit denen Lieferantendaten verwaltet und Abrechnungen auf Korrektheit und Überzahlungen geprüft werden können. Das Unternehmen hat seinen Sitz im kalifornischen San José.
  - On Deck Capital mit Sitz in New York City verleiht über eine Softwareplattform Kapital an kleinere Einzelhändler. Dabei geht On Deck Capital nach einem eigenen Kreditkonzept vor, das sich an den Geschäftsdaten und nicht am Kreditranking der Unternehmen orientiert.



---

## MITARBEITER

An mehr als 60 % aller weltweiten Geschäftstransaktionen ist ein SAP-System beteiligt. Diese wesentliche Bedeutung der SAP für die internationale Wirtschaft ist in erster Linie das Verdienst unserer Mitarbeiter: Sie spielen eine entscheidende Rolle für alle Unternehmen, die mithilfe unserer Lösungen und Dienstleistungen als Best-run Businesses erfolgreich sein wollen. 2010 war geprägt von einer Rückbesinnung auf unsere Stärken, aber auch von vielfältigen Herausforderungen, die wir engagiert angingen. Ziel unserer Initiativen war es, den Innovationsgeist der SAP mit neuem Leben zu füllen, unser Augenmerk verstärkt auf unsere Mitarbeiter zu richten, in sie zu investieren, ihre Vielfalt zu fördern und eine neue Generation von Führungskräften heranzubilden. Hierzu initiierten wir eine neue Mitarbeiterstrategie, die wesentlicher Bestandteil unserer Unternehmensstrategie ist. Wir sind der festen Überzeugung, dass Erfolg durch Innovation und engagiertes Handeln entsteht. Die Maßnahmen im Rahmen unserer neuen Mitarbeiterstrategie konzentrieren sich deshalb auf die Entwicklung von Führungskompetenzen, das Leistungs- und Vergütungsmanagement, die Mitarbeiterentwicklung, die Gewinnung von Talenten und die Organisationsentwicklung. Sie stehen im Einklang mit unseren Unternehmenszielen und stellen sicher, dass stets die richtigen Mitarbeiter mit den richtigen Qualifikationen am richtigen Standort zur Verfügung stehen.

### Weltweite Suche nach Talenten

Als globales Unternehmen beschäftigt die SAP Mitarbeiter aus aller Welt. Die Mobilität von Arbeitnehmern und die Globalisierung sind ausschlaggebend für die zunehmend internationale Zusammensetzung unserer Belegschaft. Deren Vielfalt spiegelt die unterschiedlichen Anforderungen lokaler und regionaler Arbeitsmärkte sowie die breit gefächerten Qualifikationen der Bewerber wider. Wir verstehen diese Internationalität als strategischen Vorteil, denn entsprechend den Stärken und Kenntnissen unserer Mitarbeiter können wir an verschiedenen Standorten Schwerpunktbereiche herausbilden. Zugleich profitieren wir von einem engen Kontakt zu unseren Kunden und Partnern vor Ort und schaffen die Grundlage für gemeinsame Innovation.

Auch bei der Einstellung neuer Mitarbeiter ist die Förderung der personellen Vielfalt unser Leitgedanke. Wir bemühen uns darum, für jede offene Position geeignete Bewerber mit unterschiedlichem Hintergrund in Betracht zu ziehen. An

allen Standorten stehen angemessene Prozesse zur Verfügung, um offene Stellen so transparent auszuschreiben, dass sie ein möglichst breites Spektrum an Bewerbern ansprechen. Als Leitfaden für die Einstellung von Mitarbeitern dient die SAP Global Recruiting Policy. Sie beinhaltet alle personalwirtschaftlichen Richtlinien für die interne und externe Personalbeschaffung.

### Förderung und Bindung von Spitzenkräften

SAP legt großen Wert auf eine aktive Förderung aller Talente und bietet ihnen leistungsabhängige Entwicklungsmöglichkeiten, die sie auf zukünftige Positionen vorbereiten.

Wir investieren gezielt in die berufliche Weiterbildung unserer Mitarbeiter. In unserem unternehmenseigenen Intranet haben wir ein Career Success Center für Mitarbeiter und das Manager Success Center für Führungskräfte eingerichtet, die wichtige Instrumente für die Karriereplanung sind. Unsere Mitarbeiter finden hier Unterlagen und Informationen, beispielsweise Schulungsmaterialien und Onlinekurse. Das Schulungsangebot reicht von Soft Skills bis hin zu SAP-spezifischen Themen, sodass sich jeder Mitarbeiter die Kenntnisse und Fähigkeiten aneignen kann, die er in seiner jeweiligen Funktion benötigt. 2010 konnten unsere Mitarbeiter durchschnittlich rund zehn Tage Schulungen absolvieren.

In der Value University, einer virtuellen Schulungsumgebung, können sich Mitarbeiter aus dem Vertrieb und dem Vertriebsinnendienst in rollenspezifischen Kursen grundlegendes Wissen aneignen und wichtige Verkaufsinstrumente kennenlernen. Indem wir die Entwicklung unserer Mitarbeiter fördern, legen wir zugleich einen wichtigen Grundstein für den Erfolg unserer Kunden. So ist die Value University Teil unserer Strategie, qualifizierte Mitarbeiter durch Weiterbildungsangebote zu gewinnen, zu halten und weiterzuentwickeln und gleichzeitig für unsere Kunden und Aktionäre Mehrwert zu schaffen.

Wir betrachten die Mitarbeiterfluktuation als wichtigen Erfolgsmesser für unsere Personalpolitik. Von 11 % im Jahr 2009 fiel die Fluktuationsrate bei SAP weltweit auf 9 % im Jahr 2010, wobei der Vorjahreswert durch Restrukturierungsmaßnahmen beeinflusst war. Damit erreichte sie den niedrigsten Stand seit der ersten Messung im Jahr 2007. Wir freuen uns über diese positive Entwicklung, sind jedoch konstant darum bemüht,

---

die Mitarbeiterfluktuation weiter zu reduzieren. Hierzu schaffen wir ein Arbeitsumfeld, in dem unsere Mitarbeiter ihr Potenzial voll entfalten können und in dem sich ihr Einsatz lohnt. In der Region EMEA betrug die Fluktuation im Berichtsjahr 5,6 % (2009: 8,2 %), in der Region Amerika 9,8 % (2009: 16,6 %) und in der Region Asien-Pazifik-Japan 15,1 % (2009: 13,2 %). Die Fluktuationsrate ist der Quotient aus der Anzahl der Mitarbeiter, die die SAP verlassen, und der durchschnittlichen Mitarbeiterzahl im Geschäftsjahr, ausgedrückt in Prozent. Die durchschnittliche Firmenzugehörigkeit belief sich weltweit auf rund 6,4 Jahre (2009: 5,2 Jahre).

### **Mitarbeiter partizipieren am Erfolg der SAP**

Nur hoch motivierte Mitarbeiter können die Spitzenleistungen erbringen, die unsere Kunden verlangen. Um solche Mitarbeiter an das Unternehmen zu binden, müssen wir nicht nur ihre Begeisterung wecken, sondern ihnen auch attraktive und wettbewerbsfähige Arbeitsbedingungen bieten. Deshalb beteiligt die SAP ihre Mitarbeiter großzügig am Unternehmenserfolg. Neben einer angemessenen Vergütung erhalten Mitarbeiter auch zahlreiche Zusatzleistungen.

2010 haben wir unser neues aktienbasiertes Vergütungsprogramm Share Matching Plan (SMP 331) eingeführt. Dieses Instrument dient dazu, die Treue der Mitarbeiter und ihren persönlichen Beitrag zum Erfolg des Unternehmens zu honorieren. Der Aktienbesitz fördert zum einen die langfristige Bindung der Mitarbeiter und schafft zum anderen attraktive Konditionen, um neue Spitzenkräfte für das Unternehmen zu gewinnen. Der Share Matching Plan verfolgt eine einfache Anlagestrategie: Die Mitarbeiter erwerben jeweils mindestens drei Aktien mit einem Preisabschlag von 40 %. Werden diese Aktien drei Jahre lang nicht veräußert, erhalten sie kostenlos eine weitere Aktie. Nahezu 60 % aller teilnahmeberechtigten Mitarbeiter haben 2010 im Rahmen des Share Matching Plan Aktien erworben. Mit diesem Erfolg wurden die Ziele der SAP bei Weitem übertroffen.

Der Stock Option Plan 2010 (SOP 2010) ist ein virtuelles Aktienoptionsprogramm, das in Kombination mit dem Share Matching Plan die Leistung der Mitarbeiter umfassend honoriert. Die SAP hat klare Zielgruppen für dieses Programm definiert, um das Potenzial und die Eigenverantwortung von Mitarbeitern noch gezielter würdigen zu können. So hat sich die Zahl der Teilnehmer am SOP 2010 auf über 7.000 Mitarbeiter verdoppelt.

### **Diversity**

Diversity – die Vielfalt bei unseren Mitarbeitern und Führungskräften – ist ein fester Bestandteil unserer Strategie und eine Grundvoraussetzung für den nachhaltigen Erfolg unseres Unternehmens. Unsere Global Diversity Policy geht über die rein gesetzlichen Anforderungen hinaus. So gehört die Förderung der Vielfalt zu den Grundpfeilern unseres Managementmodells. Wir sehen es als Bereicherung, dass jeder Mitarbeiter seine besonderen Eigenschaften und Stärken mit in das Unternehmen einbringt, und versuchen, das individuelle Potenzial jedes Einzelnen zu fördern. Dabei legen wir großen Wert auf ein Umfeld, in dem Vielfalt gelebt wird, und respektieren und unterstützen alle Mitarbeiter, unabhängig von ihren individuellen Besonderheiten.

Zum 31. Dezember 2010 waren weltweit Mitarbeiter aus über 120 Ländern bei SAP beschäftigt. An unserem Unternehmenssitz in Walldorf sind Mitarbeiter aus mehr als 75 Nationen vertreten. Mit verschiedenen Richtlinien und Maßnahmen versucht die SAP, auf die vielfältige Zusammensetzung ihrer Belegschaft einzugehen. Hierzu gehören Programme für ein ausgewogenes Verhältnis von Arbeit und Privatleben wie flexible Arbeitszeiten und verschiedene Teilzeitmodelle, Arbeitszeitmodelle wie Auszeiten (Sabbaticals) und Vorruhestand, Heimarbeitsplätze, Angebote zur Vereinbarkeit von Familie und Beruf (zum Beispiel durch Eltern-Kind-Büros), eine leistungsbezogene Vergütung, eine gezielte Planung im Hinblick auf Einstellungs- und Weiterbildungsstrategien sowie umfassende Gesundheitsprogramme.

In den vergangenen Jahren war der Anteil von Frauen in Führungspositionen eines unserer Schwerpunktthemen. Frauen sind in den Ingenieur- und Naturwissenschaften sowie in der Informatik vergleichsweise schwach vertreten. Dies wirkt sich auf die Gleichstellung von Männern und Frauen in der gesamten IT-Branche und vor allem auf der Managementebene aus. Nach einer kürzlich von der Managementberatung Tower Perrins durchgeführten Studie sind nur 16 % der Topmanager in der Informations- und Kommunikationstechnologiebranche Frauen.

Die Einstellung, Bindung und Förderung qualifizierter Frauen haben wir deshalb zu einem vorrangigen Thema gemacht. Insgesamt sind bereits 30 % unserer Mitarbeiter Frauen (2009: 29 %). Dabei schenken wir dem Frauenanteil in Führungspositionen als wichtigem Erfolgsindikator besondere Beachtung.

Der Gesamtanteil der weiblichen Führungskräfte lag 2010 bei 17,8 % gegenüber 17,7 % im Jahr 2009. Wir haben uns zum Ziel gesetzt, durch aktive Förderung und die Schaffung der richtigen Rahmenbedingungen den Frauenanteil bei SAP zu erhöhen. So haben wir zum Beispiel in Indien den Frauenanteil bei Neueinstellungen innerhalb eines Jahres auf 36 % verdoppelt.

Auch die Alterszusammensetzung unserer Belegschaft sehen wir als wichtigen Diversity-Indikator. Wir erwarten, dass dieser Aspekt in den kommenden Jahren zunehmende Bedeutung erhalten wird: Denn eine Belegschaft, in der verschiedene Generationen vertreten sind, erhöht unsere Attraktivität als Arbeitgeber. Das Durchschnittsalter unserer Mitarbeiter lag 2010 bei etwa 39 Jahren (2009: 38 Jahre).

#### Internationale Auszeichnungen als Arbeitgeber

SAP belegt regelmäßig Spitzenplätze in verschiedenen Ranglisten der attraktivsten Arbeitgeber weltweit. Diese Anerkennung ist in erster Linie das Verdienst unserer Mitarbeiter. Im Jahr 2010 erhielten wir unter anderem folgende Auszeichnungen:

- SAP Südafrika wurde 2010 als der beste Arbeitgeber in Südafrika in der Studie „Best Employers“ des CRF Institute ausgezeichnet.
- Das „Great Place to Work for“-Institut bescheinigte uns, dass SAP Argentinien einer der zehn besten Arbeitgeber und SAP Finnland einer der Top 15-Arbeitgeber in dem jeweiligen Land ist.
- Bei der US-amerikanischen Human Rights Campaign Foundation erzielten wir ein Spitzenergebnis von 100 Punkten im Corporate Equality Index 2010 und bei der Umfrage „Best Places to Work“.
- In der vom Berliner trendence Institut durchgeführten Studie „trendence Absolventenbarometer 2010“ wählten uns angehende Informatikerinnen und Informatiker auf den dritten Platz in der „IT Edition“.

Weitere Informationen zu den Themen Mitarbeiterengagement und -zufriedenheit, Vielfalt, Entwicklung von Führungskompetenzen, Gesundheitsförderung und Auszeichnungen als Arbeitgeber finden Sie in unserem Nachhaltigkeitsbericht unter [www.sapsustainabilityreport.com](http://www.sapsustainabilityreport.com).

#### Entwicklung der Mitarbeiterzahl

Ende des Jahres 2010 beschäftigten wir umgerechnet in Vollzeitbeschäftigte 53.513 Mitarbeiter weltweit (31. Dezember 2009: 47.584). Dies entspricht einem Anstieg der Mitarbeiteranzahl von 5.929 gegenüber dem Vorjahr. Im Geschäftsjahr 2010 lag die Zahl der Mitarbeiterzugänge durch Akquisitionen bei 4.233. Von den Neuzugängen entfielen 3.817 auf Zugänge durch das im Juli erworbene Unternehmen Sybase. Am 31. Dezember 2010 lag die Anzahl der auf das akquirierte Unternehmen Sybase entfallenden Mitarbeiter bei 3.726. Die durchschnittliche Zahl der Mitarbeiter im Geschäftsjahr 2010 lag bei 49.970 (2009: 48.769).

#### Mitarbeiterzahl zum Jahresende

Vollzeitbeschäftigte | Veränderung zum Vorjahr

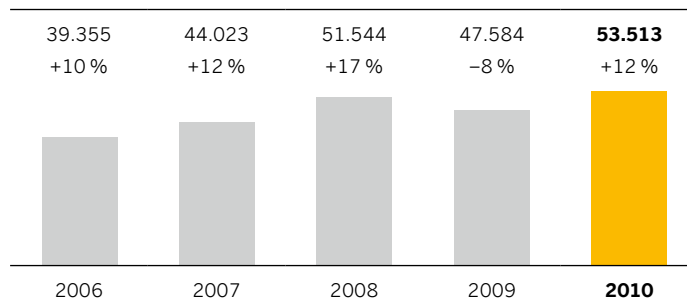

Die Kennzahl Vollzeitbeschäftigte drückt aus, wie viele Mitarbeiter die SAP beschäftigen würde, wenn nur Arbeitnehmer mit einem Beschäftigungsgrad von 100 % angestellt wären. Bei der SAP in Teilzeit beschäftigte Studenten sowie Mitarbeiter, die zwar bei uns beschäftigt, aber aus verschiedenen Gründen beurlaubt oder freigestellt sind, sind in den genannten Zahlen nicht enthalten. Auch Aushilfskräfte sind nicht in den genannten Zahlen enthalten. Die Anzahl dieser Aushilfskräfte ist jedoch nicht wesentlich.

Zum 31. Dezember 2010 waren die meisten unserer Mitarbeiter (50 %) in der Region EMEA beschäftigt (davon 29 % in Deutschland), 28 % in der Region Amerika (davon 20 % in den USA) und 22 % in der Region Asien-Pazifik-Japan.

Der Bereich Allgemeines und Verwaltung umfasste zum Ende des Berichtsjahres 3.576 Vollzeitstellen (2009: 3.051), was einem Anstieg von 17 % entspricht. Die Mitarbeiterzahl im Bereich Beratungs-, Schulungs- und sonstige Services erhöhte sich im Geschäftsjahr 2010 um 7 % auf 13.152 (2009: 12.348). In der Forschung und Entwicklung nahm die Anzahl der Mitarbeiter um 7 % auf nunmehr 15.884 (2009: 14.814) zu. Die Beschäftigtenzahl im Bereich Software und software-bezogene Services stieg weltweit um 23 % auf 7.885 (2009: 6.422). Die Mitarbeiterzahl im Vertrieb und Marketing stieg zum Stichtag um 15 % auf 10.987 (2009: 9.513), da wir 2010 stark in den Vertrieb unserer Produkte und Services investiert und in allen Regionen die Anzahl der Vertriebsmitarbeiter erhöht haben. Im Bereich Infrastruktur, zu dem wir die interne IT und die Gebäudeverwaltung zählen, verzeichneten wir einen Mitarbeiteranstieg von 41 % auf 2.029 (2009: 1.436).

#### Mitarbeiter nach Unternehmensbereichen

Vollzeitbeschäftigte

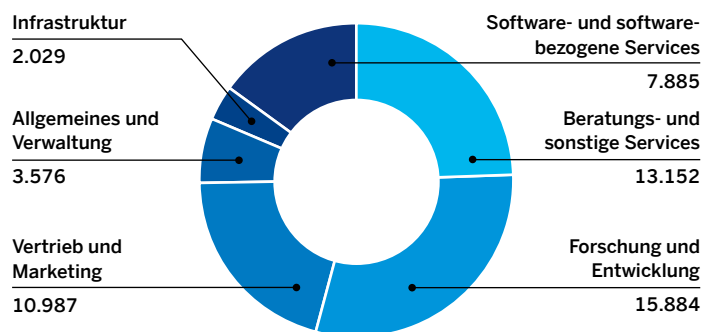

Im Jahr 2010 ergaben sich hohe Mitarbeiterzugänge aus Akquisitionen: In der Region Amerika waren es 1.975 Mitarbeiter aus Akquisitionen, in der Region EMEA 1.174 und in der Region Asien-Pazifik-Japan 1.084. In der Region Amerika erhöhte sich die Anzahl der Mitarbeiter um 2.809 oder 23 %, in der Region EMEA um 1.627 oder 6 % und in der Region Asien-Pazifik-Japan um 1.493 oder 15 %.

Der Personalaufwand je Mitarbeiter betrug im Geschäftsjahr 2010 105 Tsd. € (2009: 98 Tsd. €). Der Personalaufwand je Mitarbeiter definiert sich als Quotient des Personalaufwands dividiert durch die durchschnittliche Anzahl der Mitarbeiter. Weiter gehende Informationen zur Mitarbeitervergütung sowie eine detaillierte Übersicht über die Anzahl der Mitarbeiter sind in Textziffer (8) des Konzernanhangs enthalten.

---

## **ÄNDERUNGEN IN DER GESCHÄFTSLEITUNG**

Im Geschäftsjahr 2010 gab es verschiedene wesentliche Änderungen in unserer Geschäftsleitung:

- Im Februar 2010 verständigte sich der Aufsichtsrat mit Vorstandssprecher Léo Apotheker einvernehmlich darauf, dessen Vertrag als Vorstandsmitglied nicht zu verlängern. Léo Apotheker legte sein Vorstandsmandat mit sofortiger Wirkung nieder.
- Im Februar 2010 wurden Bill McDermott (Leiter der globalen Vertriebsorganisation) und Jim Hagemann Snabe (Leiter des Bereichs Business Solutions and Technology) zu gleichberechtigten Vorstandssprechern ernannt.
- Im Februar 2010 berief der Aufsichtsrat Vishal Sikka, Chief Technology Officer, als neues Mitglied in den Vorstand.
- Im Februar 2010 übernahm Gerhard Oswald, der als Vorstand den Bereich Global Service & Support verantwortet, zusätzlich die Aufgabe des Chief Operating Officer. In dieser Funktion ersetzte er Erwin Gunst, der krankheitsbedingt aus dem Unternehmen ausschied. Werner Brandt hatte bereits im Oktober 2009 kommissarisch die Position des Arbeitsdirektors und die Leitung des Personalwesens von Erwin Gunst übernommen und setzte dies nach dem Ausscheiden von Erwin Gunst bis zur Berufung von Angelika Dammann fort.
- Im Februar 2010 legte John Schwarz sein Vorstandsmandat mit sofortiger Wirkung nieder. Er war verantwortlich für SAP BusinessObjects, das Partnergeschäft und die strategische Unternehmensentwicklung.
- Im April 2010 wurde Angelika Dammann mit Wirkung zum 1. Juli 2010 in den Vorstand berufen. Sie verantwortet das Personalwesen und ist als Arbeitsdirektorin für die Arbeitnehmerbeziehungen zuständig.

---

## GRUNDLAGEN DER FINANZBEZOGENEN LAGEBERICHTERSTATTUNG

### Rahmenbedingungen der Berichterstattung

Seit 2007 sind wir nach deutschem und europäischem Recht verpflichtet, einen Konzernabschluss gemäß International Financial Reporting Standards (IFRS) zu erstellen. Beginnend mit unserem geprüften Konzernabschluss zum Jahresende 2009 haben wir eine vollständige Umstellung auf die IFRS-Rechnungslegung vollzogen und stellen seither keine US-GAAP-Finanzinformationen mehr bereit. Unser Geschäftsbericht 2009 sowie unser Jahresbericht auf Form 20-F für das Geschäftsjahr 2009 wurden deshalb erstmals gemäß IFRS erstellt. Ebenso basierte unser Ausblick für 2010 erstmals auf Non-IFRS-Angaben, die aus IFRS-Kennzahlen abgeleitet waren. Zeitgleich mit dieser Umstellung unserer externen Finanzberichterstattung haben wir unsere interne Berichterstattung, unsere Planung, unsere Prognosen sowie die variable Vergütung angepasst und auf die in der externen Berichterstattung verwendeten Non-IFRS-Angaben umgestellt. Ebenso wurden unsere Non-IFRS-Finanzinformationen für das Geschäftsjahr 2009 rückwirkend im Hinblick auf diese Änderung in der internen Berichterstattung aktualisiert. Wie in unserem Geschäftsbericht 2009 dargelegt, unterschieden sich unsere Non-IFRS-Angaben nicht wesentlich von unseren Non-GAAP-Angaben, sodass sich auch in unserer internen Berichterstattung keine wesentliche Veränderung ergab.

### Wertorientierte Steuerung

Im Geschäftsjahr 2010 basierten wie im Folgenden erläutert unsere Steuerung und unsere operativen Ziele primär auf währungsbereinigten Non-IFRS-Kennzahlen.

Für unsere interne Steuerung haben wir in den Geschäftsjahren 2010 und 2009 umsatzseitig hauptsächlich die Kennzahl Software- und softwarebezogene Serviceerlöse und ergebnisseitig das operative Ergebnis und die hieraus abgeleitete operative Marge herangezogen. Dabei haben wir diese Kennzahlen auf Non-IFRS-Basis verwendet. Hierzu wurden die entsprechenden IFRS-Kennzahlen um Abschreibungen auf die abgegrenzten Supporterlöse aus Akquisitionen, Ergebnisse der Veräußerungsaktivitäten und wiederkehrende akquisitionsbedingte Aufwendungen bereinigt.

### Steuerungsgrößen im operativen Geschäft

Das im SAP-Konzern eingesetzte Steuerungsinstrumentarium soll das oberste Unternehmensziel, den Unternehmenswert nachhaltig zu steigern, und das hieraus abgeleitete Ziel eines profitablen Umsatzwachstums unterstützen. Hierzu verwenden wir unterschiedliche Steuerungsgrößen:

- Non-IFRS-SSRS-Umsatz: Unsere Software- und softwarebezogenen Serviceerlöse (SSRS) beinhalten Software- und Supporterlöse sowie Subskriptions- und sonstige softwarebezogene Serviceerlöse. Softwareerlöse erzielen wir überwiegend aus dem Verkauf von Lizenzen für die Nutzung von Softwareprodukten. Unser wichtigster Umsatztreiber sind die Softwareerlöse, von denen weitere Umsatzarten abhängen. Die Softwarelizenzen sind in der Regel die Basis für den Verkauf von Wartungsleistungen, die nach Verkauf der Softwarelizenz regelmäßig anfallende softwarebezogene Serviceerlöse in Form von Supporterlösen generieren. Zu den Wartungsleistungen gehören neben dem Kundensupport auch Softwareupdates und -erweiterungen. Softwarebezogene Serviceerlöse entstehen auch, wenn wir Software als Subskriptionen oder als obligatorische Hosting-Leistung anbieten. Darüber hinaus ziehen die Softwareerlöse tendenziell weitere Folgegeschäfte, vor allem Beratung und Schulung, nach sich, die dann zu Serviceerlösen führen.
- Non-IFRS-operative Marge: Im Geschäftsjahr 2010 haben wir anhand der Kennzahl Non-IFRS-operative Marge und der währungsbereinigten Non-IFRS-operativen Marge die Effizienz unseres operativen Geschäfts und unsere Ertragskraft gemessen. Um die Non-IFRS-operative Marge zu ermitteln, wird das Non-IFRS-Betriebsergebnis ins Verhältnis zu den gesamten von der SAP erzielten Non-IFRS-Umsatzerlösen gesetzt. Die verwendeten IFRS- und Non-IFRS-Kennzahlen sind nachfolgend erläutert.
- Cash Conversion Rate: Die Cash Conversion Rate ist definiert als Non-IFRS-Verhältnis von Mittelzufluss aus laufender Geschäftstätigkeit zum Non-IFRS-Gewinn nach Steuern und zeigt, welcher Anteil unseres Non-IFRS-Gewinns nach Steuern in Cashflow umgewandelt wird.

### Steuerungsgrößen im nicht operativen Geschäft

Im nicht operativen Geschäft verwenden wir die folgenden Steuerungsgrößen:

- Finanzergebnis, netto: Diese Steuerungsgröße gibt insbesondere Auskunft über die Verzinsung der liquiden Mittel und Kapitalanlagen sowie über zu zahlende Zinsen für aufgenommene Fremdmittel. Im Mittelpunkt der Steuerung stehen

- zum einen der Cashflow, der Bestand an liquiden Mitteln und Wertpapieren und der durchschnittliche Zinssatz, zu dem die Geld- und Kapitalanlagen investiert werden, sowie zum anderen die durchschnittlich ausstehenden Kreditbeträge und die daraus resultierenden Zinsaufwendungen.
- DSO und DPO: Daneben spielt das Management des Umlaufvermögens (Working Capital Management) durch die Überwachung der Außenstandsdauer der Forderungen sowie der Verbindlichkeiten eine Rolle. Die Außenstandsdauer der Forderungen (Days of Sales Outstanding, DSO) ist definiert als durchschnittliche Anzahl der Tage von der Rechnungsstellung bis zum Eingang der Kundenzahlung; die Außenstandsdauer der Verbindlichkeiten (Days of Payables Outstanding, DPO) als durchschnittliche Anzahl der Tage vom Rechnungseingang bis zum Zahlungsausgang.
  - Effektive Steuerquote: Unsere effektive Steuerquote entspricht dem Verhältnis des Ertragsteueraufwands zum Ergebnis vor Ertragsteuern (ausgedrückt in %).

### **Steuerungsgrößen im operativen und nicht operativen Geschäft**

Das Ergebnis je Aktie umfasst sämtliche operativen und nicht operativen Erfolgsbestandteile und bildet unsere Gesamtleistung ab. Diese Kennzahl basiert auf dem Konzernergebnis und setzt dieses ins Verhältnis zur durchschnittlichen Zahl an ausstehenden SAP-Aktien. Neben dem operativen und nicht operativen Geschäft der SAP wird das Ergebnis je Aktie durch die Anzahl der ausstehenden Aktien beeinflusst. Wir sind von der Hauptversammlung der SAP ermächtigt, Aktienrückkäufe durchzuführen, und sehen in solchen Rückkäufen eine attraktive Möglichkeit, neben der Dividende weitere Mittel an unsere Aktionäre zurückzuführen.

Die integrierte Betrachtung der beschriebenen Steuerungsgrößen zusammen mit begleitenden Analysen bildet die Informationsbasis für die wertorientierte Steuerung der SAP. Dabei nutzen wir Planungs- und Kontrollprozesse zur Bereitstellung dieser Kennzahlen und zur Informationsversorgung von Entscheidungsträgern auf verschiedenen Managementebenen.

Ausgangspunkt unserer Planungs- und Kontrollprozesse ist die strategische Planung der SAP. Aus ihr leiten wir eine Mehrjahresplanung ab: Auf einer stark verdichteten Ebene ermitteln wir

die künftigen Wachstums- und Profitabilitätstreiber der SAP. Gleichzeitig stellen wir die Bereiche heraus, in die nachhaltig investiert werden soll. Anschließend verfeinern wir unsere Mehrjahresplanung für Support- und Entwicklungsbereiche und brechen die Pläne für kundennahe Bereiche auf Vertriebsregionen herunter. Über detaillierte Jahresplanungen legen wir das Budget fest, das für das Erreichen unserer Ziele zur Verfügung steht. Umsatz- und Ergebnisprognosen auf Quartalsbasis runden das Instrumentarium ab, mit dessen Hilfe wir die Umsetzung der strategischen Ziele messen und Planabweichungen feststellen. Durch kontinuierliche Überprüfungen der betroffenen Unternehmenseinheiten analysieren wir diese Entwicklungen und definieren den Handlungsbedarf.

Integrierte Planungs- und Informationssysteme auf Basis von SAP-Software bilden unsere Planungs-, Kontroll- und Berichtsprozesse durchgängig ab. Sie ermöglichen uns, aufschlussreiche Auswertungen über alle Organisationseinheiten hinweg vorzunehmen, die die Entscheidungsfindung unterstützen.

### **Kennzahlen des Berichts**

Unser Ausblick für 2010 basierte wie zuvor beschrieben auf bestimmten Non-IFRS-Kennzahlen. Daher enthält dieser Bericht einen Vergleich unserer tatsächlich erreichten Kennzahlenwerte im Geschäftsjahr 2010 mit diesem Ausblick.

Dieses einleitende Kapitel enthält:

- die Überleitung der IFRS-Kennzahlen auf die jeweils nächsten Non-IFRS-Kennzahlen;
- eine Erklärung der Non-IFRS-Kennzahlen, die wir in diesem Bericht veröffentlichen; die Gründe, warum wir glauben, dass sie für Investoren von Interesse sind, und die Grenzen dieser Kennzahlen;
- eine Erläuterung der Änderungen in der Definition unserer Non-IFRS-Ergebnis- und -Margenkennzahlen, die wir zum 1. Januar 2011 vorgenommen haben.

### **Überleitung unserer IFRS- auf Non-IFRS-Kennzahlen für die Geschäftsjahre 2010 und 2009**

In den folgenden Tabellen stellen wir für die Geschäftsjahre 2010 und 2009 Überleitungen unserer IFRS-Kennzahlen auf die entsprechenden und jeweils nächsten Non-IFRS-Kennzahlen dar. Aufgrund von Rundungen können sich in diesen Tabellen bei Summenbildungen geringfügige Abweichungen ergeben.

Mio. €, falls nicht anders bezeichnet

Berichtszeitraum 1. Januar – 31. Dezember

|                                                               | 2010          |              |               |                       |                                    | 2009          |            |               |
|---------------------------------------------------------------|---------------|--------------|---------------|-----------------------|------------------------------------|---------------|------------|---------------|
|                                                               | IFRS          | Anpassung    | Non-IFRS      | Währungs-<br>einfluss | Non-IFRS<br>währungs-<br>bereinigt | IFRS          | Anpassung  | Non-<br>IFRS  |
| <b>Umsatzzahlen</b>                                           |               |              |               |                       |                                    |               |            |               |
| Softwareerlöse                                                | 3.265         | 0            | 3.265         | -244                  | 3.021                              | 2.607         | 0          | 2.607         |
| Supporterlöse                                                 | 6.133         | 74           | 6.207         | -313                  | 5.894                              | 5.285         | 11         | 5.296         |
| Subskriptions- und sonstige<br>softwarebezogene Serviceerlöse | 396           | 0            | 396           | -13                   | 383                                | 306           | 0          | 306           |
| <b>Software- und softwarebezogene<br/>Serviceerlöse</b>       | <b>9.794</b>  | <b>74</b>    | <b>9.868</b>  | <b>-570</b>           | <b>9.298</b>                       | <b>8.198</b>  | <b>11</b>  | <b>8.209</b>  |
| – davon SAP ohne Sybase                                       | <b>9.539</b>  | <b>0</b>     | <b>9.539</b>  | <b>-545</b>           | <b>8.994</b>                       | <b>8.198</b>  | <b>11</b>  | <b>8.209</b>  |
| Beratungserlöse                                               | 2.197         | 0            | 2.197         | -118                  | 2.079                              | 2.074         | 0          | 2.074         |
| Sonstige Serviceerlöse                                        | 473           | 0            | 473           | -22                   | 451                                | 400           | 0          | 400           |
| <b>Beratungs- und sonstige<br/>Serviceerlöse</b>              | <b>2.670</b>  | <b>0</b>     | <b>2.670</b>  | <b>-140</b>           | <b>2.530</b>                       | <b>2.474</b>  | <b>0</b>   | <b>2.474</b>  |
| <b>Umsatzerlöse</b>                                           | <b>12.464</b> | <b>74</b>    | <b>12.538</b> | <b>-709</b>           | <b>11.829</b>                      | <b>10.672</b> | <b>11</b>  | <b>10.683</b> |
| <b>Operative Aufwendungen</b>                                 |               |              |               |                       |                                    |               |            |               |
| Software- und softwarebezogene<br>Servicekosten               | -1.823        | 198          | -1.625        |                       |                                    | -1.658        | 184        | -1.474        |
| Beratungs- und sonstige<br>Servicekosten                      | -2.071        | 9            | -2.062        |                       |                                    | -1.851        | 4          | -1.847        |
| Forschungs- und Entwicklungs-<br>kosten                       | -1.729        | 5            | -1.725        |                       |                                    | -1.591        | 4          | -1.587        |
| Vertriebs- und Marketingkosten                                | -2.645        | 80           | -2.565        |                       |                                    | -2.199        | 73         | -2.126        |
| Allgemeine Verwaltungskosten                                  | -636          | 16           | -620          |                       |                                    | -564          | 3          | -561          |
| Restrukturierungsaufwendungen                                 | 3             | -5           | -2            |                       |                                    | -198          | 4          | -194          |
| TomorrowNow-Rechtsstreit                                      | -981          | 981          | 0             |                       |                                    | -56           | 56         | 0             |
| Sonstige betriebliche Erträge, netto                          | 9             | 0            | 9             |                       |                                    | 33            | 0          | 33            |
| <b>Operative Aufwendungen</b>                                 | <b>-9.873</b> | <b>1.283</b> | <b>-8.591</b> | <b>370</b>            | <b>-8.221</b>                      | <b>-8.084</b> | <b>327</b> | <b>-7.756</b> |
| <b>Betriebsergebnis und<br/>operative Marge</b>               |               |              |               |                       |                                    |               |            |               |
| <b>Betriebsergebnis</b>                                       | <b>2.591</b>  | <b>1.357</b> | <b>3.947</b>  | <b>-339</b>           | <b>3.608</b>                       | <b>2.588</b>  | <b>339</b> | <b>2.927</b>  |
| <b>Operative Marge in %</b>                                   | <b>20,8</b>   |              | <b>31,5</b>   |                       | <b>30,5</b>                        | <b>24,3</b>   |            | <b>27,4</b>   |



---

Wie in den vorstehenden Tabellen dargestellt, enthält dieser Bericht bereinigte Kennzahlen. Hierzu gehören insbesondere Kennzahlen wie Non-IFRS-Umsatz, Non-IFRS-Aufwendungen, Non-IFRS-Betriebsergebnis, Non-IFRS-operative Marge sowie Angaben zu währungsbereinigten Umsätzen und zum währungsbereinigten Betriebsergebnis. Unsere bereinigten Kennzahlen werden nicht auf der Basis von IFRS-Rechnungslegungsstandards ermittelt und sind daher keine IFRS-Kennzahlen. Wie nachfolgend erläutert, können sich diese bereinigten Kennzahlen von den bereinigten Kennzahlen anderer Unternehmen unterscheiden. Kennzahlen dieser Art sollten deshalb nicht als Ersatz oder höherwertig gegenüber Umsatz, Betriebsergebnis, operativer Marge oder anderen IFRS-Kennzahlen gesehen werden, sondern stets nur als Zusatzinformation.

#### **Erläuterungen zu Non-IFRS-Finanzinformationen**

Neben den gemäß IFRS erstellten Finanzdaten enthält dieser Bericht auch vergangenheitsbezogene und zukunftsorientierte Non-IFRS-Finanzdaten. Wir glauben, dass es für Investoren von Interesse ist, diese ergänzenden Informationen zu erhalten, die auch von unserem Management herangezogen werden, um die vergangenen und zukünftigen Ergebnisse besser nachvollziehen zu können. Im Jahr 2010 verwenden wir diese Non-IFRS-Kennzahlen konsistent für unsere Planung, unsere Prognosen, unsere Berichterstattung, Vergütung und die externe Kommunikation:

- Unser Management greift bei finanziellen, strategischen und operativen Entscheidungen primär auf Non-IFRS-Kennzahlen als Entscheidungsgrundlage zurück, nicht auf IFRS-Kennzahlen.
- Die variablen Gehaltsbestandteile unserer Vorstandsmitglieder und Mitarbeiter sind vom Non-IFRS-Umsatz und vom Non-IFRS-Betriebsergebnis abhängig, nicht von den entsprechenden IFRS-Kennzahlen.
- Für den jährlichen Budgetprozess, in den alle Managementeinheiten einbezogen sind, werden der Non-IFRS-Umsatz und das Non-IFRS-Betriebsergebnis herangezogen, nicht die IFRS-Kennzahlen, wobei die Aufwendungen für aktienorientierte Vergütungen und Restrukturierungen 2010 auf Gesamtunternehmensebene berücksichtigt wurden.
- Sämtliche Analysen der erzielten Ergebnisse sowie Prognosen, die weltweit mit allen leitenden Angestellten durchgeführt werden, beruhen auf diesen Non-IFRS-Kennzahlen, nicht auf den IFRS-Kennzahlen.

- Sowohl unsere unternehmensinternen Zielvereinbarungen als auch die den Kapitalmärkten übermittelten Zielvorgaben beruhen auf dem Non-IFRS-Umsatz und Non-IFRS-Ergebnis, nicht auf IFRS-Kennzahlen.

Unsere Non-IFRS-Finanzkennzahlen sind hinsichtlich der folgenden Positionen sowie der zugehörigen Ertragsteuereffekte bereinigt:

#### **Non-IFRS-Umsatz**

Umsatzzahlen in diesem Dokument, die als Non-IFRS-Umsatz ausgewiesen sind, unterscheiden sich von den entsprechenden Angaben nach IFRS durch eine Einbeziehung der Supporterlöse, die als Folge eines Fair Value Accounting für die im Rahmen von Akquisitionen übernommenen Supportverträge gemäß IFRS nicht berichtet werden dürfen.

Nach IFRS weisen wir die im Rahmen von Akquisitionen übernommenen Supportverträge ab dem Zeitpunkt der Akquisitionen zum Fair Value aus. Als Folge hiervon beinhalten unsere IFRS-Supporterlöse, unsere IFRS-Software- und softwarebezogenen Serviceerlöse und unsere IFRS-Umsatzerlöse für die auf die Akquisitionen folgenden Perioden nicht in voller Höhe die Supporterlöse, die die übernommenen Unternehmen ausgewiesen hätten, wenn sie eigenständig geblieben wären. Die Anpassung der Umsatzzahlen hinsichtlich dieses Einflusses verbessert die Vergleichbarkeit unserer Ergebnisse von Periode zu Periode.

#### **Non-IFRS-operative Aufwendungen**

Die wie folgt definierten akquisitionsbedingten Aufwendungen werden bei unseren Angaben zu Non-IFRS-operativen Aufwendungen nicht berücksichtigt:

- Akquisitionsbedingte Aufwendungen
  - Abschreibungen auf im Rahmen von Unternehmensakquisitionen erworbene identifizierbare immaterielle Vermögenswerte und separat erworbenes geistiges Eigentum (einschließlich Aufwand aus erworbener, in der Entwicklung befindlicher Forschung und Entwicklung)
  - im Zusammenhang mit Unternehmenserwerben anfallende Restrukturierungsaufwendungen und Abfindungsaufwendungen für vor Erwerb bereits bestehende Geschäftsbeziehungen mit akquirierten Unternehmen
  - Anschaffungsnebenkosten

- 
- Veräußerungsaktivitäten: Ergebnisse aus nicht fortgeführten Geschäftstätigkeiten, die gemäß IFRS sämtliche Kriterien für eine solche Klassifizierung erfüllen, bis auf die Tatsache, dass sie keinen abtrennbaren größeren Geschäftszweig darstellen. Gemäß der bis einschließlich 2009 verwendeten Finanzberichterstattung nach US-GAAP wurde die Geschäftseinheit TomorrowNow unter den nicht fortgeführten Geschäftstätigkeiten ausgewiesen. Nach IFRS dürfen die Ergebnisse aus nicht fortgeführten Geschäftstätigkeiten nur dann gesondert ausgewiesen werden, wenn es sich dabei um einen separaten wesentlichen Geschäftszweig oder geografischen Geschäftsbereich handelt. Die Geschäftseinheit TomorrowNow war ein separater aber kein wesentlicher Geschäftszweig und erfüllte daher nicht die Anforderungen für den gesonderten Ausweis gemäß IFRS.

Der Ausblick für das Betriebsergebnis und die operative Marge für 2011 und das vergleichbare Betriebsergebnis und die operative Marge 2010 basieren auf einer aktualisierten Definition der Non-IFRS-operativen Aufwendungen, die zusätzlich folgende Aufwendungen eliminiert:

- Aufwendungen aus unseren aktienorientierten Vergütungsplänen
- Restrukturierungsaufwendungen

#### **Non-IFRS-Betriebsergebnis, Non-IFRS-operative Marge**

Angaben zum Betriebsergebnis und zur operativen Marge, die in diesem Dokument als Non-IFRS-Betriebsergebnis und Non-IFRS-operative Marge ausgewiesen werden, unterscheiden sich von den entsprechenden IFRS-Kennzahlen durch eine Bereinigung des oben genannten Non-IFRS-Umsatzes beziehungsweise der Non-IFRS-operativen Aufwendungen.

Bei der Berechnung des Non-IFRS-Betriebsergebnisses und der Non-IFRS-operativen Marge, die wir zur Evaluierung unseres laufenden operativen Ergebnisses nutzen, werden akquisitionsbedingte Aufwendungen eliminiert. Grund dafür ist, dass es der Unternehmensleitung im Allgemeinen nicht möglich ist, diese Aufwendungen nach erfolgter Übernahme zu verändern oder zu beeinflussen, außer durch die Veräußerung der erworbenen Vermögenswerte. Da die Führungsebenen unterhalb des Vorstands keinerlei Einfluss auf diese Aufwendungen haben, werden sie bei der Bewertung des Ergebnisses einzelner Geschäftseinheiten generell nicht berücksichtigt.

Darüber hinaus wurden diese Non-IFRS-Kennzahlen gegenüber den betreffenden IFRS-Kennzahlen um die Ergebnisse der Veräußerungsaktivitäten bereinigt.

Wir glauben, dass Non-IFRS-Kennzahlen für Investoren aus folgenden Gründen von Interesse sind:

- Durch Non-IFRS-Kennzahlen erhalten Investoren einen Einblick in die Entscheidungsfindungsprozesse der Unternehmensleitung, da unser Management zur Steuerung unseres Unternehmens und für finanzielle, strategische und operative Entscheidungen Non-IFRS-Kennzahlen einsetzt.
- Die Non-IFRS-Kennzahlen liefern Investoren Zusatzinformationen, die den Vergleich der operativen Ergebnisse mit Vergleichsjahren erlauben, da sie um bestimmte direkte Auswirkungen von Akquisitionen und Veräußerungsaktivitäten bereinigt sind.
- Die Nutzung von Non-IFRS- beziehungsweise Non-GAAP-Kennzahlen ist in der Softwarebranche weit verbreitet. Unsere Non-IFRS-Kennzahlen sind mit den entsprechenden Non-IFRS- und Non-GAAP-Kennzahlen unserer Wettbewerber meist besser vergleichbar als unsere IFRS-Kennzahlen.

Darüber hinaus halten wir diese Bereinigung unserer IFRS-Kennzahlen um die Ergebnisse unserer nicht fortgeführten TomorrowNow-Geschäftstätigkeiten aus den folgenden Gründen für unsere Investoren für sinnvoll:

- Trotz der Umstellung von US-GAAP auf IFRS werden wir die aufgegebene Geschäftseinheit TomorrowNow unternehmensintern auch weiter als nicht fortgeführte Geschäftstätigkeit behandeln; das heißt, potenzielle künftige Ergebnisse von TomorrowNow, die vor allem Aufwendungen aus den Rechtsstreitigkeiten mit Oracle beinhalten werden, berücksichtigen wir auch weiterhin nicht in unserer internen Berichterstattung, Planung, bei Prognosen und bei der Vergütung. Die Bereinigung der Non-IFRS-Kennzahlen um die Ergebnisse der nicht fortgeführten TomorrowNow-Geschäftstätigkeiten erhöht daher die Aussagekraft der Finanzkennzahlen, die SAP intern verwendet.
- Durch die Bereinigung um die Ergebnisse der nicht fortgeführten TomorrowNow-Geschäftstätigkeiten sind die Non-IFRS-Kennzahlen außerdem besser mit den Non-GAAP-Kennzahlen vergleichbar, die SAP bis Ende 2009 verwendet hat. Dies ermöglicht eine bessere Vergleichbarkeit der SAP-Kennzahlen vor und nach der IFRS-Umstellung.

---

Der Ausblick für das Betriebsergebnis und die operative Marge für 2011 und die Vergleichswerte für Betriebsergebnis und operative Marge 2010 basieren auf einer aktualisierten Non-IFRS-Definition, die zusätzlich die aktienorientierten Vergütungsaufwendungen sowie Restrukturierungsaufwendungen aus unseren Non-IFRS-Zahlen eliminiert. Diese Aufwendungen haben wir bisher ausschließlich auf Gesamtunternehmensebene alloziert beziehungsweise verwaltet und nicht in das Management der operativen Leistung auf tieferen Ebenen des Unternehmens einbezogen. Durch die Änderung der Non-IFRS-Definition und eine entsprechende Anpassung der in unserer Gesamtunternehmenssteuerung verwendeten Kennzahlen vereinheitlichen wir die Steuerungsgrößen über alle Unternehmensebenen hinweg. Außerdem werden hierdurch unsere Non-IFRS-Kennzahlen mit den entsprechenden Non-GAAP-Kennzahlen unserer engsten Wettbewerber vergleichbarer.

Bei Entscheidungen über die Zuteilung von Ressourcen rechnen wir die oben genannten Umsätze ein beziehungsweise eliminieren die oben genannten Aufwendungen sowohl auf Gesamtunternehmensebene als auch auf den nachgeordneten Ebenen. Darüber hinaus verwenden wir diese Non-IFRS-Kennzahlen, um die operative Leistung des Unternehmens besser über bestimmte Vergleichszeiträume beurteilen zu können. Wir gehen davon aus, dass unsere Non-IFRS-Kennzahlen insbesondere aus den folgenden Gründen nur begrenzt aussagefähig sind:

- Die eliminierten Beträge sind möglicherweise für SAP wesentlich.
- Die Non-IFRS-Kennzahlen deuten nur dann auf unsere gegenwärtigen und zukünftigen Ergebnisse hin, wenn sie in Verbindung mit den entsprechenden IFRS-Kennzahlen analysiert werden. Dies sind die wichtigsten Gründe dafür:
  - Während unsere Non-IFRS-Ergebniszahlen um bestimmte akquisitionsbedingte Aufwendungen bereinigt sind, erfolgt keine Bereinigung um die zusätzlichen Umsätze oder sonstigen Erträge aus diesen Akquisitionen.
  - Die akquisitionsbedingten Aufwendungen, um die wir unsere Non-IFRS-Ergebniszahlen bereinigen, werden voraussichtlich wiederkehren, falls SAP in der Zukunft wesentliche Übernahmen tätigt.

- Die akquisitionsbedingten Abschreibungen, um die wir unsere Non-IFRS-Ergebniszahlen bereinigen, sind wiederkehrende Aufwendungen, die sich auf unser Ergebnis in den kommenden Jahren auswirken werden.
- Die Umsatzanpassung, die aufgrund eines Fair Value Accounting für übernommene Supportverträge im Zusammenhang mit einer Akquisition erforderlich ist, und die Aufwandsanpassung für akquisitionsbedingte Aufwendungen basieren nicht auf einem gemeinsamen Konzept: Durch die Umsatzanpassung sollen die erste Periode nach der Akquisition und die zukünftigen Perioden besser vergleichbar sein, während durch die Aufwandsanpassung die Perioden vor und nach der Akquisition besser vergleichbar sein sollen. Dies sollte besonders bei der Bewertung unserer Non-IFRS-Angaben zum Betriebsergebnis und zur operativen Marge berücksichtigt werden, da diese die Non-IFRS-Umsätze und Non-IFRS-Aufwendungen miteinander verbinden, obwohl sie nicht auf einem gemeinsamen Konzept beruhen.
- Unsere Veräußerungsaktivitäten, aktienorientierten Vergütungsprogramme und Restrukturierungsmaßnahmen können erhebliche Mittelabflüsse nach sich ziehen.
- Die Bewertung unserer aktienorientierten Vergütungspläne mit Barausgleich könnte wesentlich schwanken aufgrund der Entwicklung unseres Aktienpreises und anderer Bewertungsparameter.
- Wir haben in der Vergangenheit jährlich aktienorientierte Vergütungspläne an unsere Mitarbeiter ausgegeben und planen, dies auch in Zukunft zu tun. Somit werden Aufwendungen aus aktienorientierten Vergütungsplänen regelmäßig anfallen, wobei sich die Beträge in den Berichtsperioden regelmäßig ändern werden.

Dennoch betrachten wir die Darstellung der Non-IFRS-Kennzahlen in Verbindung mit den entsprechenden IFRS-Kennzahlen sowie die relevante Überleitung als nützliche Zusatzinformation für Investoren und die Unternehmensleitung, um die aktuelle und zukünftige Entwicklung unserer Finanzlage und unseres Betriebsergebnisses besser einschätzen zu können. Wir beurteilen unser Wachstum und unsere Ergebnisse grundsätzlich unter Berücksichtigung sowohl der Non-IFRS- als auch der relevanten IFRS-Kennzahlen. Den Lesern

dieses Dokuments empfehlen wir, eine vergleichbare Vorgehensweise zu wählen und unsere Non-IFRS-Angaben nur als Ergänzung und nicht als Ersatz oder höherwertig gegenüber den Umsätzen oder anderen Finanzkennzahlen, die wir entsprechend den IFRS-Rechnungslegungsvorschriften berichten, zu verstehen.

### Währungsbereinigte Veränderungen

Informationen über die Umsatzerlöse der SAP erachten wir als eine der zentralen Größen für unsere Investoren. Über diese Veränderungen geben Umsatzzahlen auf Basis von IFRS zwar Aufschluss. Veränderungen gegenüber dem Vorjahr werden in diesen Umsatzzahlen jedoch sowohl durch das Mengenwachstum als auch durch Währungseffekte beeinflusst. Da wir keine mengenmäßig standardisierten Produkte und Dienstleistungen verkaufen, können wir nicht durch Angaben zur Anzahl der verkauften Produkt- und Dienstleistungseinheiten über die mengenmäßige Umsatzveränderung informieren. Um trotzdem entscheidungsrelevante Informationen zur Beurteilung der Umsatzveränderung zu vermitteln, geben wir die um Währungseffekte bereinigte Umsatzveränderung an. Ebenso veröffentlichen wir Daten zu bestimmten währungsbereinigten operativen Ergebnisgrößen und -komponenten. Solche währungsbereinigten Veränderungen von Umsatz- und Ergebnisgrößen basieren auf den Werten, die sich ergeben würden, wenn die in den Konzernabschluss einbezogenen Fremdwährungsabschlüsse nicht mit den Durchschnittskursen des aktuellen Berichtsjahres, sondern mit den entsprechenden Durchschnittskursen des Vorjahres umgerechnet würden.

Informationen zu währungsbereinigten Veränderungen von Umsatz- und Ergebnisgrößen sind mit Einschränkungen verbunden, insbesondere da die eliminierten Währungseffekte einen wesentlichen Bestandteil unseres Umsatzes und unserer Kosten bilden und unsere Ertragskraft wesentlich beeinflussen können. Daher beschränken wir die Verwendung der währungsbedingten Veränderungsdaten auf die Analyse der Mengenveränderung als eines Elements der Gesamtveränderung einer Finanzkennzahl. Wir beurteilen unsere Ergebnisse und unsere Ertragskraft nicht ohne Berücksichtigung sowohl der währungsbereinigten Veränderungen im Non-IFRS-Umsatz und Non-IFRS-Betriebsergebnis als auch der Veränderungen von Umsatz, Aufwendungen, Ergebnissen und anderen Kennzahlen, wie sich diese auf Basis von IFRS ergeben. Eine vergleich-

bare Vorgehensweise empfehlen wir den Lesern dieses Berichts. Dabei sind währungsbereinigte Veränderungen von Finanzkennzahlen nicht als Ersatz oder höherwertige Finanzkennzahlen, sondern stets als Zusatzinformation zu Umsatz, Aufwendungen und Konzernergebnis oder anderen IFRS-Kennzahlen anzusehen.

### Free Cashflow

Wir nutzen die Kennzahl Free Cashflow, um die Finanzmittelveränderung nach Abzug aller Auszahlungen, die zur organischer Erhaltung oder Erweiterung des Unternehmens getätigt wurden, zu ermitteln. Dadurch erhält die Unternehmensführung zusätzliche Informationen zur Beurteilung unserer Anforderungen hinsichtlich der Liquidität. Wir berechnen den Free Cashflow als Cashflows aus der betrieblichen Tätigkeit abzüglich Auszahlungen aus dem Erwerb von immateriellen Vermögenswerten und Sachanlagen. Free Cashflow ist nicht als Ersatz oder höherwertige Kennzahl, sondern stets als Zusatz zum Cashflow gemäß Konzernkapitalflussrechnung, zu anderen Liquiditätskennzahlen sowie sonstigen gemäß IFRS ermittelten Kennzahlen aufzufassen.

### Free Cashflow

| Mio. €                                                                              | 2010         | 2009         | Veränderung<br>in % |
|-------------------------------------------------------------------------------------|--------------|--------------|---------------------|
| Cashflows aus der betrieblichen Tätigkeit                                           | 2.932        | 3.015        | -3                  |
| Auszahlungen aus dem Erwerb von immateriellen Vermögensgegenständen und Sachanlagen | -334         | -225         | 48                  |
| <b>Free Cashflow</b>                                                                | <b>2.598</b> | <b>2.790</b> | <b>-7</b>           |

---

## WIRTSCHAFTLICHE RAHMENBEDINGUNGEN

### Weltwirtschaftliche Entwicklung

Die weltwirtschaftliche Entwicklung im Jahr 2010 war laut renommierten Wirtschaftsforschungsinstituten durch eine „positive Grunddynamik“ mit zunehmender Belebung der weltwirtschaftlichen Aktivität gekennzeichnet. Diese Belebung ging jedoch langsamer voran als in früheren Erholungsphasen nach wirtschaftlichen Krisen. Dabei ließ sich im ersten Halbjahr 2010 noch ein zügiger Aufschwung der Weltwirtschaft beobachten, der sich jedoch im zweiten Halbjahr wieder abschwächte. Grund hierfür war nicht zuletzt das zunehmende Auslaufen staatlicher Konjunkturprogramme.

Die Schwellenländer erholten sich 2010 besser von der vorangegangenen Wirtschaftskrise als die Industrieländer und verzeichneten ein insgesamt robustes Wachstum. Die Industrieländer hingegen hatten während des gesamten Jahres mit ihrem schwachen Arbeitsmarkt und dem geringen Vertrauen ihrer Bevölkerung in die wirtschaftliche Erholung zu kämpfen. Entsprechend blieb der Aufschwung hier verhältnismäßig schwach und unbeständig.

Auch innerhalb der Region Europa, Naher Osten, Afrika war der Aufschwung unterschiedlich stark ausgeprägt: Die wirtschaftliche Lage der Länder der Eurozone besserte sich zwar langsam und kontinuierlich, blieb aber nach wie vor hinter dem Niveau zurück, das diese Länder vor der Krise erreicht hatten. Die wirtschaftliche Erholung profitierte hier vor allem von den wieder erstarkten Exporten und dem zunehmenden Privatkonsum. Als hinderlich dagegen erwies sich die immer noch zögerliche Kreditvergabe durch die Banken. Besonders erfolgreich innerhalb der Eurozone war 2010 die deutsche Wirtschaft: Sie konnte ein deutliches Wachstum verzeichnen, da sich die Lage auf dem deutschen Arbeitsmarkt im Jahresverlauf unerwartet rasch besserte. In den mittel- und osteuropäischen Ländern dagegen, die besonders stark von der Krise betroffen waren, verhinderte die schleppende Inlandsnachfrage einen kräftigeren Aufschwung, während sich die Volkswirtschaften in Afrika und dem Nahen Osten deutlich erholten und wieder zu wachsen begannen. Das lag vor allem am wieder gestiegenen Ölpreis, aber auch an staatlichen Maßnahmen, mit denen die Regierungen der ölexportierenden Länder Wirtschaftssektoren ohne Bezug zum Öl förderten.

In der Region Amerika verlangsamte sich der US-amerikanische Wirtschaftsaufschwung trotz umfangreicher staatlicher Konjunkturprogramme bereits im zweiten Quartal 2010. Die Industrieproduktion weitete sich nur langsam aus, lediglich die Konsumausgaben nahmen im vierten Quartal wieder zu. Damit befand sich die Wirtschaft in den USA Ende 2010 auf einem ähnlichen Niveau wie vor der Krise. In Lateinamerika dagegen blieb das Wachstum das ganze Jahr über robust im oberen einstelligen Prozentbereich, vor allem dank hoher Rohstoffpreise.

Am schnellsten wuchsen 2010 die Schwellenländer der Region Asien-Pazifik-Japan. Hier nahm das Bruttoinlandsprodukt aufgrund kräftiger Inlandsnachfrage und staatlicher Konjunkturmaßnahmen um durchschnittlich fast zweistellige Werte zu. Bis Jahresende konnte sich das Wirtschaftswachstum in diesen Ländern so weit stabilisieren und selbst tragen, dass sie zum Jahreswechsel ein höheres Niveau als vor der Krise erreichten. Lediglich Japan erholte sich trotz zweier staatlicher Konjunkturpakete bis zum Jahresende nicht von der Krise und blieb deutlich unter dem Niveau, das es vor der Rezession innehatte. Als Hauptschwierigkeit des exportorientierten Landes erwies sich dabei die anhaltend schwache Auslandsnachfrage.

### Lage des IT-Marktes

Im Jahr 2010 erholte sich auch der globale IT-Markt von der Krise der zwei vorangegangenen Jahre. Im gesamten Jahr lag das Wachstum der weltweiten IT-Investitionen im oberen einstelligen Prozentbereich und bereits zum Jahresende wiesen sie laut der Investmentbank Goldman Sachs den höchsten Stand seit November 2007 auf. Damit verlief das vierte Quartal jahreszeitgemäß und war nicht mehr von der Krise geprägt.

In den Schwellenländern stiegen dabei die IT-Investitionen das ganze Jahr über schneller als in den Industrieländern. Das US-amerikanische Marktforschungsunternehmen International Data Corporation (IDC) führt diesen Unterschied darauf zurück, dass Unternehmen und Verbraucher in den Industrieländern sich – durch die Krise geprägt – mit Ausgaben zurück-

---

hielten und Banken nach wie vor nur zögerlich Kredite vergaben. Noch größer wäre der Abstand laut IDC möglicherweise ausgefallen, wenn der IT-Markt der Industrieländer nicht fast während des gesamten Jahres von den Maßnahmen ihrer Regierungen zur Unterstützung der Wirtschaft profitiert hätte.

Besonders erfolgreich mit zweistelligen Zuwachsraten war 2010 das Hardwaregeschäft, meldet IDC. Unternehmen holten demnach verstärkt diejenigen Investitionen nach, die sie während der Krise aufgeschoben hatten. Die Zuwachsraten bei Software und Services blieben dagegen im unteren einstelligen Bereich. Allerdings gewannen 2010 mehrere neue Technologien an Bedeutung: So begann sich etwa das Social Web auch im geschäftlichen Bereich durchzusetzen, berichtet das US-amerikanische Marktforschungsunternehmen Forrester. Ein weiteres prägendes Thema auf dem Softwaremarkt waren im Jahr 2010 laut Forrester neue nicht-relationale Datenbanktechnologien zur Verwaltung sehr großer Nutzerzahlen und Datenmengen, die relationale Datenbanken ersetzen könnten. Schließlich wuchs 2010 auch der Markt für Unternehmensanwendungen als „Software as a Service“ im zweistelligen Prozentbereich, so der US-amerikanische Marktforschungsanbieter Gartner.

Im Bericht über die Region Europa, Naher Osten, Afrika meldet IDC, dass die IT-Investitionen 2010 nach der Krise auch in Westeuropa wieder deutlich stiegen. In der Region Amerika investierten im abgelaufenen Jahr insbesondere kleine und mittelständische Unternehmen wieder in IT, so IDC, wovon neben Software und Services in erster Linie das Segment Hardware profitierte. Die Region Asien-Pazifik-Japan übertraf die Vorausberechnungen des Instituts 2010 sogar. Dies lag allerdings hauptsächlich daran, dass diese Region 2009 stärker von der Krise betroffen war, als IDC ursprünglich erwartet hatte.

---

## VERMÖGENS-, FINANZ- UND ERTRAGSLAGE

### **Darstellung der Geschäftsentwicklung im Vergleich zum Ausblick für 2010 (Non-IFRS)**

Im Jahr 2010 basierten unsere interne Steuerung und unsere operativen Ertragsziele sowie der veröffentlichte Ausblick auf Non-IFRS-Kennzahlen. Daher greifen wir im nächsten Abschnitt zur Erläuterung der Geschäftsentwicklung im Vergleich zu unserem Ausblick ausschließlich auf Non-IFRS-Kennzahlen, die aus IFRS-Kennzahlen abgeleitet sind, zurück und kennzeichnen sie als solche. Die Erläuterungen im nachstehenden Abschnitt zur Ertragslage nach IFRS beschränken sich auf IFRS-Zahlen, die daher nicht explizit als solche gekennzeichnet sind.

### **Ausblick 2010 (Non-IFRS)**

Anfang 2010 sagten wir voraus, dass unsere operative Marge (Non-IFRS) für das Gesamtjahr 2010 ohne Berücksichtigung der Wechselkurseinflüsse zwischen 30 % und 31 % (2009: 27,4 %) liegen würde. Außerdem erwarteten wir, dass die Software- und softwarebezogenen Serviceerlöse (Non-IFRS) für das Geschäftsjahr 2010 ohne Berücksichtigung der Wechselkurseinflüsse um 4 % bis 8 % steigen würden (2009: 8,2 Mrd. €).

Nachdem wir unseren im Januar 2010 veröffentlichten Ausblick für das Jahr 2010 im April noch bestätigt hatten, änderten wir ihn im Juli 2010, um den Erwerb von Sybase zu berücksichtigen. Wir erwarteten nunmehr, dass die Software- und softwarebezogenen Serviceerlöse (Non-IFRS) für das Geschäftsjahr 2010 ohne Berücksichtigung der Wechselkurseinflüsse um 9 % bis 11 % steigen würden (2009: 8,2 Mrd. €). Dabei gingen wir davon aus, dass das SAP-Geschäft ohne Berücksichtigung der Sybase-Ergebnisse auch weiterhin voraussichtlich 6 bis 8 Prozentpunkte zu diesem Wachstum beitragen würde. Wir rechneten mit einer operativen Marge (Non-IFRS) für das Geschäftsjahr 2010 ohne Berücksichtigung der Wechselkurse in einer Spanne von 30 % bis 31 % (2009: 27,4 %).

Im Oktober 2010 bestätigten wir unseren im Juli 2010 veröffentlichten Ausblick.

Im Geschäftsjahr 2010 rechneten wir mit einer effektiven Steuerquote (IFRS) von 27,5 % bis 28,5 % (2009: 28,1 %).

### **Tatsächliche Entwicklung im Geschäftsjahr 2010 im Vergleich zum Ausblick (Non-IFRS)**

Ohne Berücksichtigung der Wechselkurseinflüsse steigerten wir unsere Software- und softwarebezogenen Serviceerlöse (Non-IFRS) 2010 um 13 % auf 9,3 Mrd. € (2009: 8,2 Mrd. €) und übertrafen damit unsere im Januar 2010 bekannt gegebenen Annahmen (4 % bis 8 %) sowie den im Juli aktualisierten Ausblick (9 % bis 11 %). Dieses Wachstum ist in erster Linie auf die im Jahr 2010 einsetzende wirtschaftliche Erholung zurückzuführen, die zu einer deutlich höheren Investitionsbereitschaft bei unseren Neu- und Bestandskunden führte. Dabei trug das SAP-Geschäft ohne Berücksichtigung der Sybase-Umsätze sowie ohne Berücksichtigung der Wechselkurseinflüsse 10 Prozentpunkte zum Wachstum der Software- und softwarebezogenen Serviceerlöse (Non-IFRS) bei.

2010 erzielten wir eine operative Marge (Non-IFRS) von 30,5 % ohne Berücksichtigung der Wechselkurseinflüsse. Damit lagen wir im Bereich des im Jahr 2010 bekannt gegebenen Ausblicks (30 % bis 31 %). Dies entspricht einem Anstieg um 3,1 Prozentpunkte gegenüber der operativen Marge (Non-IFRS) im Vorjahr von 27,4 %. Anders als im Vorjahr war das Geschäftsjahr 2010 nicht wesentlich durch Restrukturierungsaufwendungen beeinträchtigt, die die operative Marge (Non-IFRS) im Gesamtjahr 2009 mit 1,8 Prozentpunkten belastet hatten.

Wir erzielten eine effektive Steuerquote von 22,5 % (basierend auf IFRS). Damit lagen wir deutlich unter der für das Geschäftsjahr 2010 bekannt gegebenen Erwartung (27,5 % bis 28,5 %). Die Minderung gegenüber dem Ausblick ist im Wesentlichen auf den Steuereffekt aus der Erhöhung der Rückstellung für den TomorrowNow-Rechtsstreit zurückzuführen.

### **Entwicklung der Ertragslage (IFRS)**

Im folgenden Abschnitt über die Ertragslage nach IFRS werden unsere Ergebnisse ausschließlich auf der Basis von IFRS-Zahlen analysiert, die daher nicht explizit als solche gekennzeichnet sind.

Infolge des Erwerbs von Sybase Ende Juli 2010 sind die Ergebnisse von Sybase nur für die Monate August bis Dezember 2010 enthalten.

## Umsatzentwicklung

### Umsatzerlöse

Die Umsatzerlöse stiegen von 10.672 Mio. € im Jahr 2009 auf 12.464 Mio. € im Jahr 2010, was einem Zuwachs um 1.792 Mio. € oder 17 % entspricht. Das SAP-Geschäft trug ohne Berücksichtigung der Sybase-Ergebnisse 14 % zu diesem Wachstum bei. Dieser Anstieg beinhaltet einen Zuwachs aus Volumen- und Preisänderungen von 10 % und eine Zunahme aus Währungsveränderungen von 7 %. Das Erlöswachstum resultiert hauptsächlich aus einem Anstieg der Softwareerlöse um 658 Mio. € und einem Anstieg der Supporterlöse um 848 Mio. €. Außerdem steigerten wir unsere Subskriptions- und sonstigen softwarebezogenen Serviceerlöse. Die Software- und softwarebezogenen Serviceerlöse beliefen sich 2010 bedingt durch diesen Anstieg auf 9.794 Mio. €. Der Anteil der Software- und softwarebezogenen Serviceerlöse an den Umsatzerlösen belief sich 2010 auf 79 % gegenüber 77 % im Jahr 2009. Die Beratungs- und sonstigen Serviceerlöse trugen im Jahr 2010 2.670 Mio. € zu unseren Umsatzerlösen bei, was einem Anstieg um 8 % gegenüber 2009 entspricht. Der Anteil der Beratungs- und sonstigen Serviceerlöse an den Umsatzerlösen belief sich 2010 auf 21 % gegenüber 23 % im Jahr 2009.

Die Aufteilung der Umsatzerlöse auf einzelne Regionen und Branchen wird in den Abschnitten Umsatzerlöse nach Regionen sowie Umsatzerlöse nach Branchen erläutert.

### Umsatzerlöse

Mio. € | Veränderung zum Vorjahr

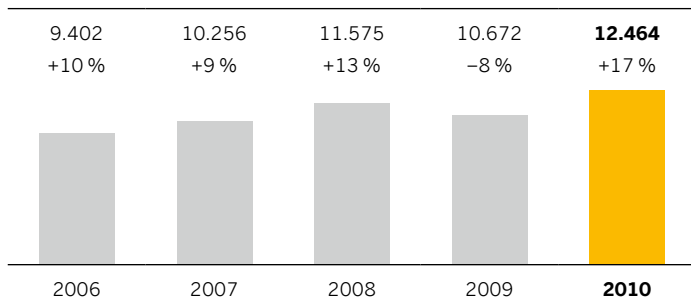

### Software- und softwarebezogene Serviceerlöse

Die Softwareerlöse resultieren aus den Lizenzgebühren, die wir aus dem Verkauf oder der Lizenzierung von Software an Kunden erzielen. Supporterlöse verkörpern den Umsatz, den wir durch technischen Kundensupport und nicht spezifizierte Softwareupgrades, -updates und -erweiterungen generieren. Die Subskriptions- und sonstigen softwarebezogenen Serviceerlöse beinhalten die Erlöse aus Subskriptionen, aus On-Demand-Angeboten, der Softwareverpachtung und aus anderen Arten von softwarebezogenen Dienstleistungsverträgen.

### Softwareerlöse

Mio. € | Veränderung zum Vorjahr

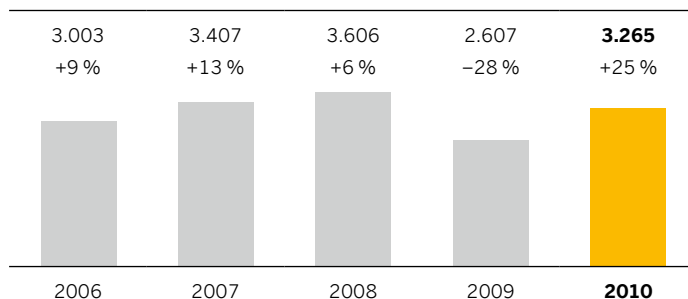

Die Software- und softwarebezogenen Serviceerlöse stiegen von 8.198 Mio. € im Jahr 2009 auf 9.794 Mio. € im Jahr 2010, was einem Wachstum um 19 % entspricht. Das Erlöswachstum setzt sich aus einem Anstieg aus Volumen- und Preisänderungen von 13 % und einem Anstieg aus Währungsveränderungen von 6 % zusammen. Das SAP-Geschäft trug ohne Berücksichtigung der Sybase-Ergebnisse 16 % zu diesem Wachstum bei.

Die Softwareerlöse stiegen von 2.607 Mio. € im Jahr 2009 auf 3.265 Mio. € im Jahr 2010, was einem Zuwachs um 658 Mio. € oder 25 % entspricht. Diese Zunahme beinhaltet ein Wachstum aus Volumen- und Preisänderungen von 16 % und einen Anstieg aus Währungsveränderungen von 9 %.

Die SAP Business Suite trug den größten Anteil zum organischen Wachstum der Softwareerlöse bei, gefolgt von SAP-Business-Objects-Lösungen sowie Produkten, die auf unserer Technologieplattform SAP NetWeaver basieren.



### Software- und softwarebezogene Serviceerlöse

Mio. € | Veränderung zum Vorjahr

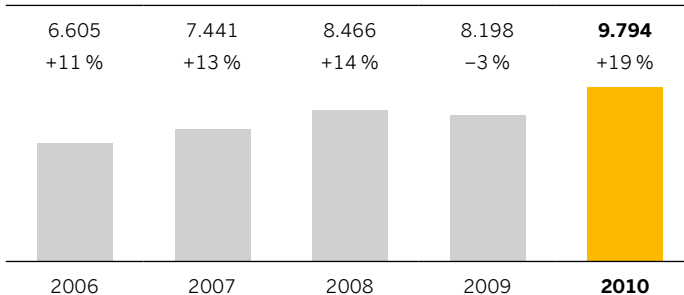

2010 hat sich unsere Kundenbasis weiter vergrößert. Gemessen am Auftragseingangswert für Software ohne Berücksichtigung von Sybase sind im Jahr 2010 18 % unserer Auftragseingänge für Software auf Verträge mit Neukunden zurückzuführen (2009: 17 %). Der Auftragseingangswert für Software ohne Berücksichtigung von Sybase wuchs gegenüber dem Vorjahr um 21 %. Die Gesamtzahl der abgeschlossenen Verträge für neue Software ohne Berücksichtigung von Sybase stieg um 5 % auf 44.875 (2009: 42.639).

Unsere stabile Kundenbasis und der anhaltende Verkauf von Software an Bestands- und Neukunden im gesamten Geschäftsjahr 2010 hatten einen Anstieg der Supporterlöse von 5.285 Mio. € im Jahr 2009 auf 6.133 Mio. € im Jahr 2010 zur Folge, was einer Zunahme um 848 Mio. € oder 16 % entspricht. Der Anstieg der Supporterlöse beinhaltet ein Wachstum aus Volumen- und Preisänderungen von 10 % und eine Zunahme aus Währungsveränderungen von 6 %. Der größte Teil der Supporterlöse entfällt auf das Wartungsangebot SAP Enterprise Support.

Die Subskriptions- und sonstigen softwarebezogenen Serviceerlöse stiegen um 90 Mio. € oder 29 % auf 396 Mio. € (2009: 306 Mio. €). Das Wachstum der Erlöse beinhaltet einen Anstieg aus Volumen- und Preisänderungen von 25 % und eine Zunahme aus Währungsveränderungen von 4 %. Das Wachstum resultiert primär aus den 2009 und 2010 abgeschlossenen Subskriptionsverträgen.

### Beratungs- und sonstige Serviceerlöse

Beratungs- und sonstige Serviceerlöse generieren wir in erster Linie aus dem Beratungsgeschäft sowie aus sonstigen Dienstleistungen. Die Beratungserlöse werden vorwiegend aus der Implementierung unserer Softwareprodukte erzielt. Die sonstigen Serviceerlöse beinhalten im Wesentlichen Schulungserlöse aus Weiterbildungsangeboten für Kunden und Partner zur Nutzung unserer Softwareprodukte und zu verwandten Themen sowie Erlöse aus dem von Sybase übernommenen Geschäft mit Messaging-Services.

Die Beratungs- und sonstigen Serviceerlöse stiegen von 2.474 Mio. € im Jahr 2009 auf 2.670 Mio. € im Jahr 2010, was einem Zuwachs um 196 Mio. € oder 8 % entspricht. Dieses Wachstum beinhaltet einen Anstieg aus Volumen- und Preisänderungen von 2 % und eine Zunahme aus Währungsveränderungen von 6 %.

Die Beratungserlöse stiegen von 2.074 Mio. € im Jahr 2009 auf 2.197 Mio. € im Jahr 2010, was einem Zuwachs um 6 % aus Währungsveränderungen entspricht. Damit belief sich der Anteil der Beratungserlöse an den gesamten Beratungs- und sonstigen Serviceerlösen auf 82 % (2009: 84 %). Der Anteil der Beratungserlöse an den Umsatzerlösen betrug 18 % im Jahr 2010 (2009: 19 %). Da ein großer Teil der Beratungserlöse im Nachgang zu Softwarekäufen erteilt wird, ist das Wachstum der Beratungserlöse vor dem Hintergrund der schwächeren Softwareerlöse des Vorjahres zu sehen und insofern nicht überraschend.

Die sonstigen Serviceerlöse stiegen von 400 Mio. € im Jahr 2009 auf 473 Mio. € im Jahr 2010, was einem Zuwachs um 18 % entspricht. Dieser Anstieg beinhaltet eine Zunahme aus Volumen- und Preisänderungen von 13 % und einen Anstieg aus Währungsveränderungen von 5 %. Diese Zunahme ist im Wesentlichen bedingt durch Schulungserlöse, Erlöse aus Hostingverträgen unserer IT-Organisation, die für den Betrieb, die Verwaltung und die Wartung von SAP-Lösungen zuständig ist, sowie Erlöse aus Messaging-Services, die aus dem Erwerb von Sybase im Juli 2010 resultieren.

## Umsatzerlöse nach Regionen und Branchen

### Umsatzerlöse nach Regionen

Wir gliedern unsere Geschäftstätigkeit nach den folgenden drei Regionen: die Region Europa, Naher Osten und Afrika (EMEA), die Region Amerika, die Nord- und Lateinamerika umfasst, sowie die Region Asien-Pazifik-Japan (APJ), zu der Japan, Australien und andere Länder Asiens gehören. Die Umsatzaufteilung erfolgt nach dem Sitz des Kunden. Textziffer (29) des Anhangs zu unserem Konzernabschluss enthält weitere Informationen zu unserer Geschäftstätigkeit in den einzelnen Regionen.

#### Umsatzerlöse nach Regionen (nach dem Sitz des Kunden)

Mio. €

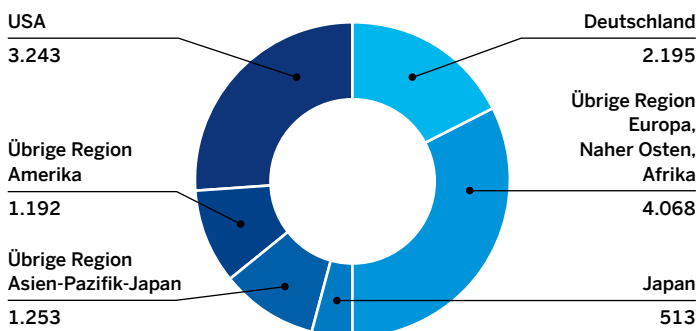

### Region EMEA

Im Jahr 2010 entfielen mit 6.263 Mio. € (2009: 5.643 Mio. €) 50 % (2009: 53 %) unserer Umsatzerlöse auf die Region EMEA. Dies entspricht einem Umsatzanstieg gegenüber dem Vorjahr um 11 %. Das Wachstum beinhaltet eine Zunahme aus Volumen- und Preisänderungen von 8 % und einen Anstieg aus Währungsveränderungen von 3 %. Die Umsatzerlöse in Deutschland stiegen um 8 % auf 2.195 Mio. € (2009: 2.029 Mio. €). Der auf Deutschland entfallende Anteil an unseren Umsatzerlösen in der Region EMEA betrug 35 %; dies entspricht einem Rückgang um 1 Prozentpunkt gegenüber 2009. Die restlichen Erlöse der Region EMEA stammten in erster Linie aus Großbritannien, Frankreich, der Schweiz, den Nieder-

landen, Italien und Russland. Die Software- und softwarebezogenen Serviceerlöse der Region EMEA beliefen sich auf 4.883 Mio. € (2009: 4.336 Mio. €). Der Anteil der Software- und softwarebezogenen Serviceerlöse an den Umsatzerlösen belief sich auf 78 % gegenüber 77 % im Jahr 2009.

### Region Amerika

2010 entfielen 36 % (2009: 34 %) unserer Umsatzerlöse auf die Region Amerika. Die Umsatzerlöse in der Region Amerika stiegen um 23 % auf 4.435 Mio. €; die in den USA erzielten Umsatzerlöse erhöhten sich um 20 % auf 3.243 Mio. €. Dieses Wachstum beinhaltet eine Zunahme aus Volumen- und Preisänderungen von 13 % und einen Anstieg aus Währungsveränderungen von 7 %. Der auf die USA entfallende Anteil an den Umsatzerlösen in der Region Amerika betrug 73 % (2009: 74 %). In den übrigen Ländern der Region Amerika kletterten die Umsatzerlöse um 29 % auf 1.192 Mio. €. Dieser Anstieg beinhaltet einen Zuwachs aus Volumen- und Preisänderungen von 15 % und einen Anstieg aus Währungsveränderungen von 14 %. Diese Erlöse wurden hauptsächlich in Kanada, Brasilien und Mexiko generiert. Die Software- und softwarebezogenen Serviceerlöse der Region Amerika stiegen um 26 % (darin ist ein positiver Währungseffekt von 9 % enthalten) auf 3.427 Mio. € (2009: 2.718 Mio. €). Damit beträgt die Summe der Software- und softwarebezogenen Serviceerlöse an den Umsatzerlösen 77 % (2009: 75 %).

### Region APJ

2010 entfielen 14 % (2009: 13 %) unserer Umsatzerlöse auf die Region APJ, wobei der größte Umsatzbeitrag hier in Japan erzielt wurde. Die Umsatzerlöse in der Region APJ stiegen um 25 % auf 1.766 Mio. €. In Japan steigerten wir unsere Umsatzerlöse um 8 % auf 513 Mio. €, was einem Anteil an den in der Region APJ erzielten Umsatzerlösen von 29 % (2009: 34 %) entspricht. Der Umsatzanstieg in Japan beinhaltet einen Rückgang aus Volumen- und Preisänderungen von 5 % und einen Anstieg aus Währungsveränderungen von 13 %. In den übrigen Ländern der Region APJ nahmen die Umsatzerlöse um 34 % zu. Dieser Anstieg beinhaltet ein Wachstum aus Volumen- und Preisänderungen von 16 % und ein Wachstum aus Währungsveränderungen von 18 %. Die Umsatzerlöse in den übrigen Ländern der Region APJ wurden hauptsächlich in Australien, Indien und China erzielt. Die Region APJ erreichte bei den Soft-

ware- und softwarebezogenen Serviceerlösen ein Wachstum von 30 % (darin ist ein positiver Währungseffekt von 17 % enthalten) auf 1.485 Mio. € (2009: 1.144 Mio. €). Der Anteil der Software- und softwarebezogenen Serviceerlöse an den Umsatzerlösen stieg auf 84 % gegenüber 81 % im Jahr 2009.

### Umsatzerlöse nach Branchen

Wir haben sechs Branchengruppen festgelegt, um unsere Entwicklungstätigkeit gezielt auf die wichtigsten Sparten unserer bestehenden und potenziellen Kunden auszurichten und ihnen Best Practices und spezielle integrierte Geschäftslösungen bieten zu können. Die Zuteilung unserer Kunden zu einer dieser Branchengruppen erfolgt bei der ersten vertraglichen Vereinbarung. Die Erlöse, die wir anschließend aus Geschäften mit einem bestimmten Kunden erzielen, ordnen wir der betreffenden Gruppe zu.

#### Umsatzerlöse nach Branchen

Mio. €

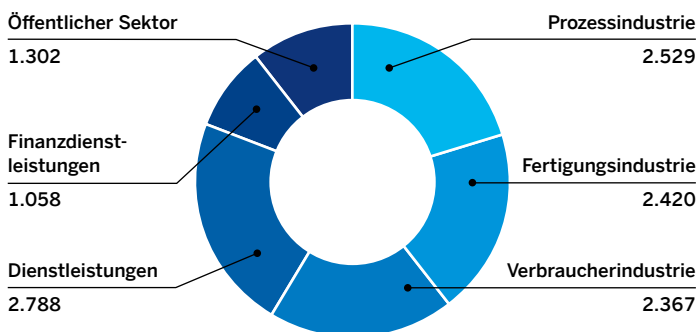

In allen Branchengruppen haben wir im Jahr 2010 ein zweistelliges Wachstum verzeichnet.

In den beiden folgenden Sektoren erzielten wir ein überdurchschnittliches Ergebnis, gemessen an der Veränderung der Umsatzerlöse von 17 % im Jahr 2010: Prozessindustrie (2.529 Mio. € bei einer Wachstumsrate von 26 %) und Verbraucherindustrien (2.367 Mio. € bei einer Wachstumsrate von 20 %). Die Ergebnisse der anderen Sektoren waren wie folgt: Finanzdienstleistungsbranche: 1.058 Mio. € bei einer Wachstumsrate

von 16 %, Öffentliche Verwaltung: 1.302 Mio. € bei einer Wachstumsrate von 15 %, Fertigungsindustrie: 2.420 Mio. € bei einer Wachstumsrate von 14 % und Dienstleistungsbranche: 2.788 Mio. € bei einer Wachstumsrate von 11 %.

### Betriebsergebnis und operative Marge

#### Betriebsergebnis und operative Marge

2010 belief sich unser Betriebsergebnis auf 2.591 Mio. € (2009: 2.588 Mio. €) und lag damit auf dem Niveau des Vorjahres, obwohl es durch Aufwendungen in Höhe von 981 Mio. € (2009: 56 Mio. €) negativ beeinflusst war. Diese Aufwendungen resultierten aus der Erhöhung der für den TomorrowNow-Rechtsstreit gebildeten Rückstellung. Textziffer (24) des Anhangs zu unserem Konzernabschluss enthält weitere Informationen zum TomorrowNow-Rechtsstreit. Außerdem war das Betriebsergebnis durch akquisitionsbedingte Aufwendungen in Höhe von 300 Mio. € stärker belastet als im Vorjahr (2009: 271 Mio. €).

Obwohl akquisitionsbedingte Aufwendungen sowie Effekte aus der nicht fortgeführten TomorrowNow-Geschäftstätigkeit im Jahr 2010 einen negativen Einfluss von 10,3 Prozentpunkten (2009: 3,1 Prozentpunkte) auf unsere operative Marge hatten, fiel die operative Marge nur um 3,5 Prozentpunkte auf 20,8 % (2009: 24,3 %). Dabei ist jedoch zu berücksichtigen, dass unser Betriebsergebnis 2009 durch Restrukturisierungskosten in Höhe von 198 Mio. € belastet war, was nachteilige Auswirkungen von 1,9 Prozentpunkten auf die operative Marge hatte. Dagegen wirkten sich Restrukturisierungsaufwendungen im Jahr 2010 nicht wesentlich auf unsere operative Marge aus.

#### Betriebsergebnis

Mio. € | Veränderung zum Vorjahr

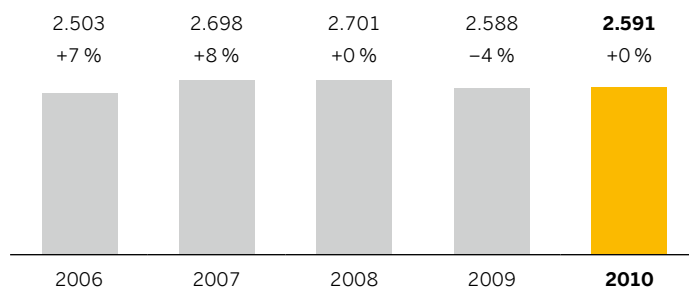

## Operative Marge

Prozent | Veränderung zum Vorjahr

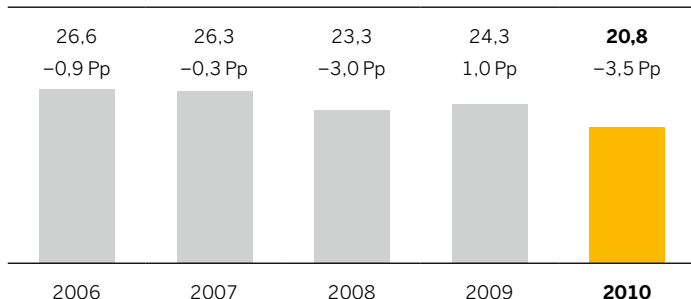

Die operativen Aufwendungen stiegen 2010 auf 9.873 Mio. € (2009: 8.084 Mio. €), was einer Erhöhung um 1.789 Mio. € beziehungsweise 22 % entspricht. Dieser Anstieg ist im Wesentlichen auf die Erhöhung der Aufwendungen in Verbindung mit der nicht fortgeführten TomorrowNow-Geschäftstätigkeit sowie auf den Erwerb von Sybase zurückzuführen.

In den folgenden Abschnitten erläutern wir die Entwicklung der einzelnen Komponenten der Umsatzkosten. Alle Komponenten waren in den Monaten August bis Dezember 2010 durch die Einbeziehung von Sybase beeinflusst.

### Software- und softwarebezogene Serviceaufwendungen

Die Software- und softwarebezogenen Serviceaufwendungen umfassen hauptsächlich verschiedene Kosten für Kundensupport, Kosten für die Entwicklung individueller Kundenlösungen, die den jeweiligen geschäftlichen Anforderungen der Kunden Rechnung tragen, sowie an Dritte gezahlte Lizenzgebühren und Provisionen für Datenbanken und andere komplementäre Produkte externer Anbieter, die wir an unsere Kunden weiterlizenzieren.

Die Software- und softwarebezogenen Serviceaufwendungen stiegen 2010 um 10 % auf 1.823 Mio. € (2009: 1.658 Mio. €). Der Hauptkostenfaktor war der Aufbau des Personalbestands zur Abdeckung der steigenden Nachfrage im Bereich SAP Enterprise Support im Jahr 2010, was wiederum zu einer positiven Entwicklung der Supporterlöse beitrug. Die Marge des Software- und softwarebezogenen Servicegeschäfts, also das Verhältnis des Bruttoergebnisses aus Software und soft-

warebezogenen Services zu den Software- und softwarebezogenen Serviceerlösen, erhöhte sich 2010 auf 81 % (2009: 80 %).

### Beratungs- und sonstige Servicekosten

Die Beratungs- und sonstigen Servicekosten setzen sich in erster Linie aus Personalaufwendungen für Beratungs- und Schulungspersonal sowie aus Aufwendungen für zugekaufte Beratungs- und Schulungsdienstleistungen externer Anbieter zusammen. Diese Position beinhaltet außerdem Vertriebs- und Marketingkosten in Zusammenhang mit unseren Beratungs- und sonstigen Services, die aus Vertriebs- und Marketingaktivitäten resultieren, die nicht klar von der Erbringung der Services abgegrenzt werden können.

Die Beratungs- und sonstigen Servicekosten stiegen von 1.851 Mio. € im Jahr 2009 um 12 % auf 2.071 Mio. € im Jahr 2010. Die Marge des Beratungs- und sonstigen Servicegeschäfts, also das Verhältnis des Bruttoergebnisses aus Beratungs- und sonstigen Services zu den Beratungs- und sonstigen Serviceerlösen, sank auf 22 % (2009: 25 %).

Die Ursachen für den Rückgang der Profitabilität waren primär Investitionen, die zur Vorbereitung auf eine steigende Nachfrage nach dem Abschwung im Jahr 2009 getätigt wurden, sowie Aufwendungen aus verlustbringenden Beratungsverträgen.

### Forschung und Entwicklung

Unsere Aufwendungen für Forschung und Entwicklung (F&E) umfassen vorwiegend Personalaufwendungen für unsere F&E-Mitarbeiter, Kosten für unabhängige Dienstleister, die wir zur Unterstützung unserer F&E-Aktivitäten beauftragt haben, und Abschreibungen für im Rahmen unserer F&E-Aktivitäten genutzte Computerhardware und -software.

Die F&E-Kosten erhöhten sich im Jahr 2010 auf 1.729 Mio. €, was einer Zunahme um 9 % gegenüber dem Vorjahr entspricht. Diese Erhöhung war im Wesentlichen auf die Einbeziehung von Sybase sowie nachteilige Währungseffekte zurückzuführen.

Der Anteil der F&E-Kosten an den Umsatzerlösen belief sich im Gesamtjahr 2010 auf 14 % gegenüber 15 % im Jahr 2009. Die vorteilhafte Umsatzentwicklung gegenüber 2009 wirkte sich im Zusammenhang mit den unterproportional gestiegenen F&E-Aufwendungen positiv auf die F&E-Quote aus.

### Vertriebs- und Marketingkosten

Die Vertriebs- und Marketingkosten bestehen hauptsächlich aus Personalaufwendungen und Kosten des Direktvertriebs zur Unterstützung unserer Vertriebs- und Marketingbereiche bei Vertrieb und Marketing unserer Produkte und Dienstleistungen.

Die Vertriebs- und Marketingkosten stiegen von 2.199 Mio. € im Jahr 2009 um 20 % auf 2.645 Mio. € im Jahr 2010. Dieser Anstieg ist hauptsächlich auf die höheren Reise- und Marketingkosten aufgrund der Zunahme der Geschäftsaktivitäten sowie nachteilige Währungsveränderungen zurückzuführen. Die Vergrößerung unserer Vertriebsmannschaft beschleunigte unser Umsatzwachstum. Dabei konnte die Quote der Vertriebs- und Marketingkosten an den Umsatzerlösen mit 21 % weitestgehend auf Vorjahresniveau gehalten werden.

### Allgemeine Verwaltungskosten

Die allgemeinen Verwaltungskosten beinhalten in erster Linie Personalaufwendungen zur Unterstützung unserer Finanz- und Verwaltungsfunktionen.

Unsere allgemeinen Verwaltungskosten stiegen von 564 Mio. € im Jahr 2009 auf 636 Mio. € im Jahr 2010, was einem Anstieg um 13 % entspricht. Der Kostenanstieg ist hauptsächlich auf die Einbeziehung von Sybase sowie nachteilige Währungsveränderungen zurückzuführen.

Das Verhältnis der allgemeinen Verwaltungskosten zu den Umsatzerlösen blieb im Jahr 2010 mit 5 % auf Vorjahresniveau.

### Segmentberichterstattung

Der Erwerb von Sybase führte auch zu einer Änderung in unserer internen Berichterstattung an die Geschäftsführung. Neben den bereits bestehenden Segmenten Produkt, Beratung und Schulung haben wir ein neues berichtspflichtiges Segment eingerichtet. Obwohl dieses Segment die Bezeichnung Sybase trägt, ist es nicht identisch mit dem übernommenen Sybase-Geschäft, da Teile davon in andere berichtspflichtige Segmente integriert wurden und bestimmte SAP-Aktivitäten in das Sybase-Segment eingebracht wurden.

Die Zahlen zu den Umsatzerlösen und den Ergebnissen der einzelnen operativen Segmente unterscheiden sich aufgrund einiger Unterschiede zwischen dem internen Berichtswesen

und der externen Berichterstattung nach IFRS von den in der Konzern-Gewinn- und Verlustrechnung ausgewiesenen Umsatz- und Ergebniszahlen. Weitere Informationen zu unserer Segmentberichterstattung sowie eine Überleitung von der internen Berichterstattung auf die externe Berichterstattung nach IFRS entnehmen Sie bitte Textziffer (29) des Anhangs zum Konzernabschluss.

### Produktsegment

Die Aktivitäten im Produktsegment erstrecken sich auf den Vertrieb und die Lizenzierung unserer Software sowie auf die technische Unterstützung (Support) unserer Software. Support beinhaltet den technischen Support in Bezug auf unsere Produkte, Unterstützung bei der Lösung von Problemen, die Bereitstellung von Benutzerdokumentation sowie nicht spezifizierte Softwareupgrades, -updates und erweiterungen. Das Produktsegment übernimmt auch bestimmte Projekte zur Entwicklung maßgeschneiderter Lösungen. Zum Produktsegment gehören die Geschäftsbereiche Vertrieb, Marketing sowie Service und Support.

### Rendite des Produktsegments

Prozent

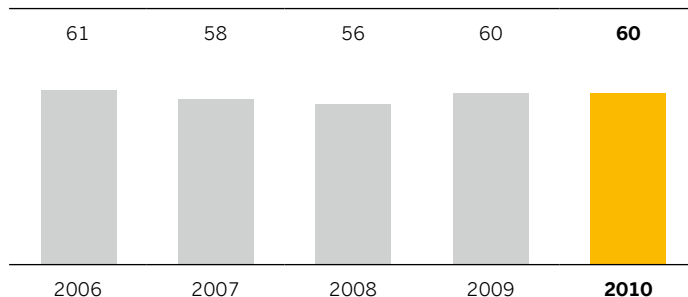

Die Erlöse im Produktsegment nahmen im Jahr 2010 um 15 % auf 9.020 Mio. € (2009: 7.846 Mio. €) zu. Dieses Wachstum beinhaltet einen Anstieg aus Volumen- und Preisänderungen von 8 % und einen Zuwachs aus Währungsveränderungen von 7 %. Grund für diese Zunahme war der Anstieg im Bereich der Lizenzierung unserer Softwarelösungen, was wiederum zur Steigerung der Supporterlöse beitrug. Die Softwareerlöse, die den Umsatzerlösen im Produktsegment zuzurechnen sind, stiegen um 17 % auf 2.766 Mio. € (2009: 2.373 Mio. €). Dieses Wachstum ist auf einen Anstieg aus Volumen- und

Preisänderungen von 8 % und einen Zuwachs aus Währungsveränderungen von 9 % zurückzuführen. Die Supporterlöse nahmen um 14 % auf 5.776 Mio. € (2009: 5.076 Mio. €) zu. Dieses Wachstum beinhaltet einen Anstieg aus Volumen- und Preisänderungen von 8 % und einen Zuwachs aus Währungsveränderungen von 6 %. Die Subskriptions- und sonstigen softwarebezogenen Serviceerlöse stiegen um 28 % auf 387 Mio. € (2009: 304 Mio. €).

Die Aufwendungen im Produktsegment stiegen im Jahr 2010 um 16 % auf 3.625 Mio. € (2009: 3.115 Mio. €). Die Aufwendungen aus dem Softwarevertrieb machen rund 54 % der gesamten Aufwendungen des Produktsegments aus, wohingegen rund 17 % der gesamten Aufwendungen des Produktsegments dem Marketing und ungefähr 29 % den Supportleistungen zuzurechnen sind. Der Anstieg der Aufwendungen im Produktsegment ist darauf zurückzuführen, dass die Geschäftsaktivitäten infolge der im Jahr 2010 einsetzenden wirtschaftlichen Erholung zunahmen.

Der Segmentbeitrag des Produktsegments stieg von 4.731 Mio. € im Jahr 2009 auf 5.395 Mio. € im Jahr 2010, was einem Zuwachs um 14 % entspricht. Die Rendite des Produktsegments lag unverändert bei 60 %.

### Beratungssegment

Die Aktivitäten im Beratungssegment erstrecken sich vornehmlich auf die Implementierung unserer Softwareprodukte.

Die Erlöse im Beratungssegment stiegen im Jahr 2010 um 9 % auf 2.714 Mio. € (2009: 2.498 Mio. €). Dieses Wachstum beinhaltet einen Anstieg aus Volumen- und Preisänderungen von 3 % und einen Zuwachs aus Währungsveränderungen von 6 %. Geografisch gesehen haben alle Regionen zum Erlösanstieg des Segments beigetragen, vor allem Nordamerika und die Region APJ.

Die Aufwendungen im Beratungssegment stiegen um 15 % auf 1.968 Mio. € (2009: 1.717 Mio. €). Der Kostenanstieg ist primär auf die Investitionen zurückzuführen, die zur Vorbereitung auf die steigende Nachfrage im Jahr 2010 nach dem Abschwung im Jahr 2009 getätigt wurden.

### Rendite des Beratungssegments

Prozent

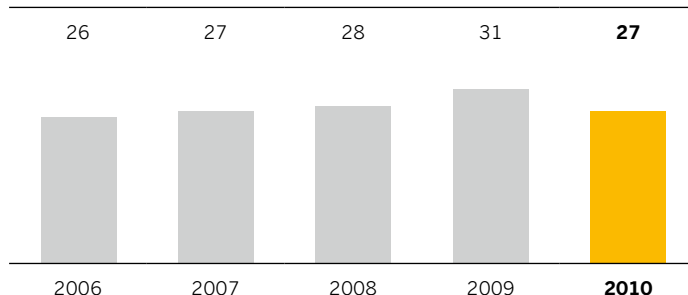

Der Segmentbeitrag des Beratungssegments fiel um 5 % auf 746 Mio. € (2009: 781 Mio. €), was einer Rendite des Beratungssegments von 27 % (2009: 31 %) entspricht.

### Schulungssegment

Das Schulungssegment umfasst Weiterbildungsangebote zur Nutzung unserer Softwareprodukte und zu verwandten Themen für Kunden und Partner. Die Ausbildungsaktivitäten beinhalten klassische Präsenzs Schulungen in den Schulungsräumen der SAP, individuelle Schulungsprogramme für Kunden und Partner, Anwenderschulungsprojekte sowie E-Learning.

### Rendite des Schulungssegments

Prozent

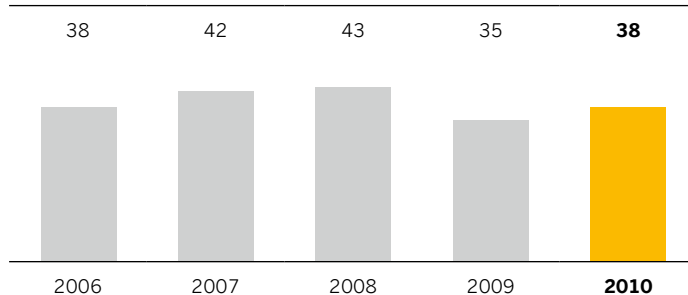

Die Erlöse im Schulungssegment beliefen sich im Jahr 2010 auf 362 Mio. €, was einem Anstieg um 9 % gegenüber dem Vorjahreswert von 332 Mio. € entspricht. Dieses Wachstum bein-



hält einen Zuwachs aus Volumen- und Preisänderungen von 2 % und einen Anstieg aus Währungsveränderungen von 7 %. Geografisch betrachtet trugen die Regionen Amerika und APJ zu dem Erlöswachstum bei. Das Wachstum unserer Schulungserlöse fiel in Nordamerika mit einem Anstieg von 29 % besonders hoch aus. Dagegen verzeichneten wir in der Region EMEA einen Rückgang von 3 %.

Die Aufwendungen im Schulungssegment stiegen um 4 % auf 226 Mio. € (2009: 217 Mio. €). Der Kostenanstieg ist auf die Zunahme der Geschäftsaktivitäten im Jahr 2010 nach dem Abschwung im Jahr 2009 zurückzuführen.

Der Segmentbeitrag des Schulungssegments wuchs um 18 % auf 136 Mio. € (2009: 115 Mio. €), was einer Rendite des Schulungssegments von 38 % (2009: 35 %) entspricht.

### Sybase-Segment

Das Sybase-Segment befasst sich in erster Linie mit der Umsetzung unserer Vision eines drahtlosen Unternehmens für Kunden und Partner. Dabei stellen wir Unternehmenssoftware und mobile Softwarelösungen für Informationsmanagement, Entwicklung und Integration bereit.

#### Rendite des Sybase-Segments

Prozent

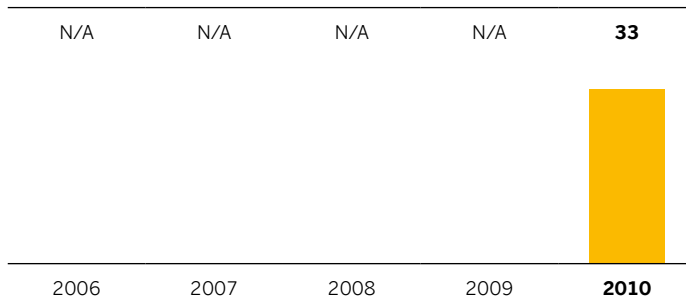

Die Bewertung des Segmentbeitrags für das Sybase-Segment unterscheidet sich von der jeweiligen Bewertung der anderen Segmente, da dieses Segment Entwicklungs-, Verwaltungs- und sonstige Aufwendungen umfasst, die im Betrag der anderen Segmente nicht enthalten sind.

Die Erlöse des Segments Sybase in Höhe von 387 Mio. € sind vorwiegend auf das Geschäft mit Datenbanken, Messaging-Services und Software für mobile Endgeräte zurückzuführen. Die Aufwendungen im Sybase-Segment beliefen sich im Jahr 2010 auf 260 Mio. €.

Der Segmentbeitrag des Segments Sybase betrug 127 Mio. €, was einer Segmentrendite von 33 % entspricht.

### Finanzergebnis, netto

Das Finanzergebnis, netto, erhöhte sich 2010 auf –67 Mio. € (2009: –80 Mio. €). Die Finanzierungserträge beliefen sich auf 73 Mio. € (2009: 37 Mio. €), während die Finanzierungsaufwendungen 140 Mio. € (2009: 117 Mio. €) betrugen.

Die Finanzierungserträge enthalten vorwiegend Zinserträge aus Ausleihungen und sonstigen finanziellen Forderungen (zum Beispiel Zahlungsmitteln, Zahlungsmitteläquivalenten und kurzfristigen Anlagen) (2010: 34 Mio. €; 2009: 35 Mio. €). Der Rückgang ist im Wesentlichen auf das gesunkene Zinsniveau zurückzuführen. Dieser Effekt wurde nur teilweise durch die höhere Durchschnittsliquidität im Vergleich zu 2009 kompensiert.

Die Finanzierungsaufwendungen umfassten im Wesentlichen Zinsaufwendungen aus finanziellen Verbindlichkeiten in Höhe von 77 Mio. € (2009: 63 Mio. €). Dieser Anstieg gegenüber dem Vorjahr resultiert hauptsächlich aus Finanzverbindlichkeiten, die im Zusammenhang mit der Akquisition von Sybase entstanden. Die Akquisition wurde über Darlehen, Anleihen und Privatplatzierungen finanziert. Weitere Informationen zu diesen Finanzierungsinstrumenten finden Sie unter Textziffer (18b) im Anhang zum Konzernabschluss. Darüber hinaus verursachte der anhängige TomorrowNow-Rechtsstreit Zinsaufwendungen in Höhe von 12 Mio. € im Jahr 2010 (2009: 0 Mio. €).

Daneben hatten die Derivate, die wir zur Steuerung unserer Finanzrisiken einsetzen, im Jahr 2010 einen deutlichen Einfluss auf das Finanzergebnis, netto. Die hierdurch verursachten Zeitwerteffekte schlugen sich in Zinserträgen in Höhe von 25 Mio. € (2009: 0 Mio. €) und Zinsaufwendungen in Höhe von 31 Mio. € (2009: 38 Mio. €) nieder.

### Ertragsteuern

Die effektive Ertragsteuerquote lag im Jahr 2010 mit 22,5 % unter dem Vorjahreswert von 28,1 %. Rund 5 Prozentpunkte der im Jahresvergleich geringeren effektiven Steuerquote resultieren aus der Erhöhung der Rückstellung für den TomorrowNow-Rechtsstreit. Weitere Informationen zu den Ertragsteuern entnehmen Sie bitte Textziffer (11) des Anhangs zum Konzernabschluss.

### Gewinn nach Steuern und Ergebnis je Aktie

Aufgrund der im Jahresvergleich deutlich niedrigeren Steuerbelastung stieg der Gewinn nach Steuern im Jahr 2010 trotz eines Vorsteuerergebnisses unter dem Vorjahreswert um 4 % auf 1.813 Mio. € (2009: 1.750 Mio. €).

#### Gewinn nach Steuern

Mio. € | Veränderung zum Vorjahr

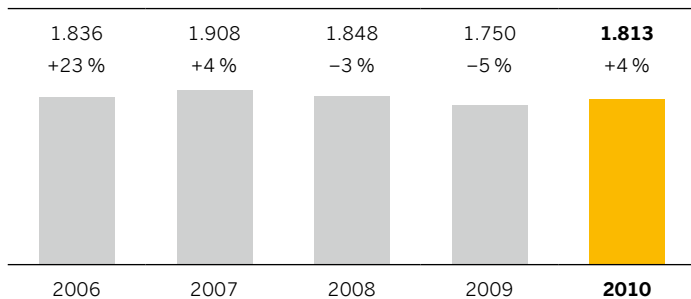

Das Ergebnis je Aktie lag mit 1,52 € über dem Vorjahreswert von 1,47 €. Der Anstieg resultiert aus dem höheren Gewinn nach Steuern gegenüber 2009, wobei sich die Anzahl der ausstehenden Aktien mit 1.188 Millionen im Vorjahresvergleich nicht verändert hat.

#### Gewinn je Aktie

€ | Veränderung zum Vorjahr

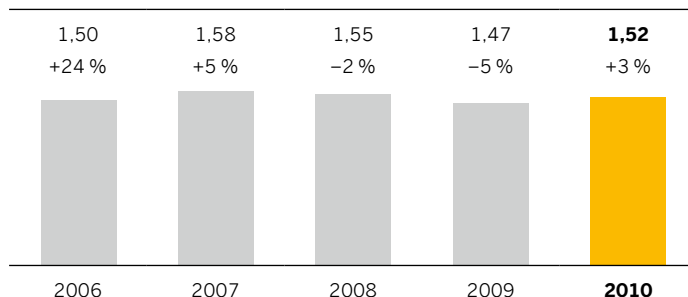

### Dividende

Wie in den Vorjahren wollen wir unsere Aktionäre angemessen am Ergebnis des Geschäftsjahres 2010 beteiligen. Dabei soll die bisherige Dividendenpolitik, die eine Ausschüttung von rund 30 % des Konzernergebnisses vorsieht, fortgeführt werden. Wir sind jedoch der Ansicht, dass die aus dem TomorrowNow-Rechtsstreit resultierenden Aufwendungen bei der Bemessung der Dividende nicht berücksichtigt werden sollten. Daher schlugen Vorstand und Aufsichtsrat der Hauptversammlung vor, die Dividende je Aktie trotz des lediglich um 4 % gestiegenen Gewinns nach Steuern (IFRS) um 20 % auf 0,60 € (2009: 0,50 €) zu erhöhen. Der Gewinn nach Steuern (Non-IFRS) hingegen hat sich gegenüber dem Vorjahr um 35 % erhöht. Damit würde die Ausschüttungsquote, hier definiert als Verhältnis zwischen Ausschüttungssumme und Gewinn, 39 % (2009: 34 %) betragen.

#### Dividende je Aktie

€ | Veränderung zum Vorjahr

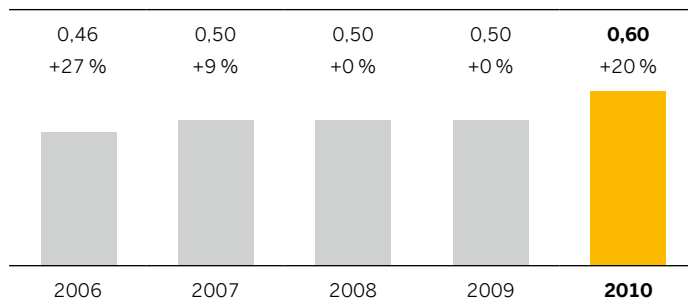



---

Wird dieser Dividendenvorschlag angenommen, so beträgt die rechnerische Gesamtausschüttung an die Aktionäre unter Berücksichtigung des Bestands an eigenen Aktien zum Jahresende 2010 713 Mio. €. Die tatsächliche Gesamtausschüttung wird jedoch voraussichtlich von diesem Betrag abweichen, da sich der Bestand an eigenen Aktien bis zum Tag der Hauptversammlung unter Umständen noch ändern kann. Außerdem kann sich durch die Bedienung der aktienbasierten Vergütungsprogramme auch das Grundkapital noch ändern. Die Dividendenausschüttung für das Jahr 2009 betrug 594 Mio. €. Neben der Ausschüttung haben wir durch Aktienrückkäufe im Geschäftsjahr 2010 weitere 220 Mio. € an unsere Aktionäre zurückgeführt. Diese Aktienrückkäufe wurden 2009 aufgrund des wirtschaftlichen Gesamtumfelds nicht durchgeführt.

## **Entwicklung der Finanzlage (IFRS)**

### **Überblick**

#### **Globales Finanzmanagement wird zentral gesteuert**

Wir verfügen über ein zentrales Finanzmanagement für die globale Liquiditätssteuerung sowie für das Zins- und Währungsmanagement. Wichtigstes Ziel des Finanzmanagements ist es, eine Konzernmindestliquidität sicherzustellen, um jederzeit Zahlungsfähigkeit zu gewährleisten. Hierzu nehmen die meisten Konzerngesellschaften an einem zentralen Cash Management teil. Die liquiden Mittel werden konzernweit zusammengefasst, überwacht und nach einheitlichen Grundsätzen investiert. Mit einem hohen Bestand an liquiden Mitteln als strategischer Liquiditätsreserve verbessern wir unsere Flexibilität, Sicherheit und Unabhängigkeit. Über weitere verschiedene Kreditlinien können wir im Bedarfsfall zusätzliche Liquiditätspotenziale nutzen. Im Dezember 2010 erhöhten wir unsere finanzielle Flexibilität zusätzlich durch die Verlängerung unserer bestehenden syndizierten Kreditfazilität bis Dezember 2015 (verfügbare Kreditlinie von 1,5 Mrd. €). Weitere Informationen hierzu finden Sie im Abschnitt Kreditlinien.

Unsere Kredit-, Liquiditäts-, Zins-, Aktienkurs- sowie Wechselkursrisiken steuern wir auf konzernweiter Basis. Ausgewählte Derivate werden ausschließlich zur Sicherung dieser Risiken eingesetzt, nicht aber für Spekulationszwecke, das heißt, ohne eine entsprechende zugrunde liegende Transaktion schließen wir kein Derivat ab. Vorschriften für den Einsatz von derivativen Finanzinstrumenten sowie weitere Regelungen und Prozesse

im Bereich des Finanzrisikomanagements haben wir in einer weltweit für alle Konzerngesellschaften gültigen Treasury-Richtlinie zusammengefasst. Weitere Informationen über das Management der einzelnen finanziellen Risiken oder den Umfang dieser Risiken finden sich unter Textziffer (25) bis (27) im Anhang zum Konzernabschluss.

#### **Liquiditätsmanagement**

Unsere primäre Liquiditätsquelle für Zahlungsmittel, Zahlungsmitteläquivalente, kurzfristige Wertpapiere und sonstige Geldanlagen ist unsere laufende Geschäftstätigkeit. In den vergangenen Jahren haben wir unsere Zahlungsmittel primär für unsere fortgeführten Geschäftsaktivitäten und unseren aus unserem Wachstum resultierenden Investitionsbedarf, für den Erwerb von Unternehmen, die Zahlung von Dividenden und den Rückkauf von SAP-Aktien auf dem freien Markt eingesetzt. Zahlungsmittel, Zahlungsmitteläquivalente, kurzfristige Wertpapiere und sonstige Geldanlagen wurden zum 31. Dezember 2010 vorwiegend in Euro und US-Dollar gehalten. Wir investieren nur in Finanzanlagen von Emittenten oder Fonds mit einem Mindestrating von „A-“ und verfolgen eine vorsichtige Anlagepolitik, die durch eine breite Streuung der Anlagen auf unterschiedliche Kontrahenten, Anlagen mit überwiegend kurzfristiger Laufzeit und Standardanlageinstrumente gekennzeichnet ist.

Wir gehen davon aus, dass unser Liquiditätsbestand in Verbindung mit unseren Finanzreserven in Form verschiedener ungenutzter Kreditlinien zur Deckung des operativen Kapitalbedarfs ausreicht und – zusammen mit den erwarteten Cashflows aus der betrieblichen Tätigkeit – unsere geplanten kurz- und mittelfristigen Investitionen abdeckt.

Zur Erweiterung unserer Geschäftstätigkeit haben wir in der Vergangenheit sowohl Unternehmen als auch Produkte und Technologien zugekauft und sind Joint-Venture-Vereinbarungen eingegangen. Weitere derartige Erwerbe und Vereinbarungen planen wir auch für die Zukunft. Weitere Informationen über die signifikanten Finanzverbindlichkeiten, die hauptsächlich im Zusammenhang mit der Akquisition von Sybase entstanden, finden sich im Abschnitt Analyse der Nettokonzernliquidität. Abhängig von unserer künftigen Finanzlage und den künftigen Marktbedingungen werden wir möglicherweise zusätzliche Finanzierungsinstrumente zur Finanzierung von Akquisitionen,

Aufrechterhaltung unserer finanziellen Flexibilität und Beschränkung des Rückzahlungsrisikos emittieren. Wir beobachten deshalb kontinuierlich die auf den Kapitalmärkten verfügbaren Finanzierungsoptionen und Trends für die Verfügbarkeit von Geldmitteln sowie die Kosten der jeweiligen Finanzierung.

### Management der Kapitalstruktur

Der Hauptzweck des Managements der Kapitalstruktur ist die Aufrechterhaltung eines starken Finanzprofils, um das Vertrauen von Investoren, Kreditgebern und Kunden zu stärken und das Wachstum unseres Geschäfts sicherzustellen. Wir streben eine Kapitalstruktur an, die es uns ermöglicht, unseren Finanzierungsbedarf zu angemessenen Bedingungen über die Kapitalmärkte zu decken. Dadurch können wir ein hohes Maß an Unabhängigkeit, Sicherheit und finanzieller Flexibilität gewährleisten.

Derzeit verfügen wir über kein Kreditrating einer Ratingagentur. Wir sind nicht der Ansicht, dass ein Rating einen wesentlichen Einfluss auf unsere derzeitigen oder künftigen Kreditaufnahmebedingungen oder Finanzierungsmöglichkeiten hätte.

Unser Ziel ist es, weiterhin in der Lage zu sein, durch die Ausschüttung jährlicher Dividenden und den Rückkauf von Aktien überschüssige Liquidität an unsere Aktionäre zurückzugeben. Der Betrag der künftigen Dividenden und der Umfang der künftigen Aktienrückkäufe werden mit unseren Bemühungen, einen adäquaten Liquiditätsstatus aufrechtzuerhalten, abgestimmt. Weitere Informationen über Dividenden und Aktienrückkäufe und unsere derzeitige Kapitalstruktur finden sich unter Textziffer (22) im Anhang zum Konzernabschluss.

Wir ermitteln regelmäßig die gewichteten durchschnittlichen Kapitalkosten (Weighted Average Cost of Capital, WACC) für den SAP-Konzern und setzen das Ergebnis für verschiedene interne Zwecke ein, beispielsweise für Werthaltigkeitstests. Die WACC betrugen zum Jahresende 2010 8 % (2009: 8 %).

## Entwicklung des Cashflows und der Liquiditätslage

### Analyse der Nettokonzernliquidität

| Mio. €                                                    | 2010         | 2009         | Veränderung   |
|-----------------------------------------------------------|--------------|--------------|---------------|
| Zahlungsmittel und Zahlungsmittel-äquivalente             | 3.518        | 1.884        | 1.634         |
| Kurzfristige Wertpapiere und sonstige Geldanlagen         | 10           | 400          | -390          |
| <b>Gesamtkonzernliquidität</b>                            | <b>3.528</b> | <b>2.284</b> | <b>1.244</b>  |
| Kurzfristige Verbindlichkeiten gegenüber Kreditinstituten | 1            | 4            | -3            |
| <b>Nettoliquidität ersten Grades</b>                      | <b>3.527</b> | <b>2.280</b> | <b>1.247</b>  |
| Langfristige Verbindlichkeiten gegenüber Kreditinstituten | 1.106        | 2            | 1.104         |
| Schuldscheindarlehen                                      | 1.071        | 697          | 374           |
| Anleihe                                                   | 2.200        | 0            | 2.200         |
| <b>Nettoliquidität zweiten Grades</b>                     | <b>-850</b>  | <b>1.581</b> | <b>-2.431</b> |

Kurzfristige Wertpapiere und sonstige Geldanlagen sind in sonstigen finanziellen Vermögenswerten der Bilanz enthalten; Bankdarlehen, Privatplatzierungen und Anleihen in den finanziellen Verbindlichkeiten. Die Gesamtkonzernliquidität zum 31. Dezember 2010 setzte sich vorwiegend aus Beträgen in US-Dollar (653 Mio. €) und in Euro (1.951 Mio. €) zusammen. Die Finanzschulden bestanden zum 31. Dezember 2010 hauptsächlich aus Beträgen in Euro (4.002 Mio. €) und US-Dollar (374 Mio. €). Etwa 23 % unserer Finanzschulden werden variabel verzinst und sind nicht abgesichert.

Die Konzernliquidität umfasst Zahlungsmittel und Zahlungsmitteläquivalente (zum Beispiel Bankeinlagen, Geldmarktfonds oder Festgelder mit einer ursprünglichen Fälligkeit von maximal drei Monaten) sowie kurzfristige Anlagen (zum Beispiel Anlagen mit einer Ursprungslaufzeit von mehr als drei Monaten und einer Restlaufzeit von weniger als zwölf Monaten), wie in unserem IFRS-Konzernabschluss angegeben.

## Entwicklung der Konzernliquidität

Mio. €

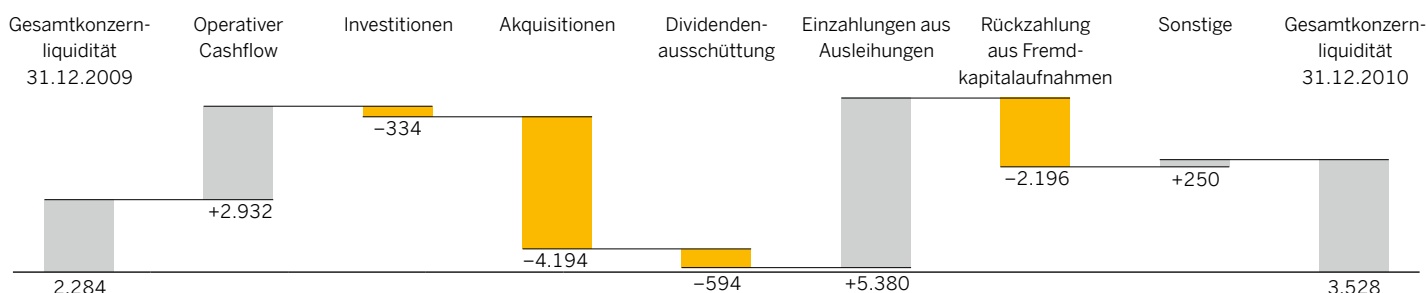

Die Finanzschulden setzen sich zusammen aus kurzfristigen Verbindlichkeiten (Überziehungskredite oder kurzfristige Darlehen) sowie langfristigen Verbindlichkeiten (langfristige Darlehen, Anleihen oder Privatplatzierungen), wie in unserem IFRS-Konzernabschluss angegeben. Weitere Informationen zu unseren Finanzschulden finden Sie unter Textziffer (18) im Anhang zum Konzernabschluss.

Als Nettoliquidität bezeichnen wir die Konzernliquidität abzüglich Finanzschulden (wie oben stehend definiert). Die Nettoliquidität sollte nicht als Ersatz für andere in unserem IFRS-Konzernabschluss enthaltene Angaben, wie Zahlungsmittel und Zahlungsmitteläquivalente, sonstige finanzielle Vermögenswerte oder finanzielle Verbindlichkeiten, verstanden werden, sondern stets als Ergänzung hierzu.

Der Anstieg der Konzernliquidität gegenüber 2009 ist hauptsächlich auf die Erträge aus unserem operativen Geschäft zurückzuführen. Der Anstieg der Finanzschulden gegenüber 2009 resultierte im Wesentlichen aus Bankdarlehen, Anleihen und Privatplatzierungen im Zusammenhang mit der Akquisition von Sybase.

Weitere Informationen zum Effekt der Zahlungsmittel, Zahlungsmitteläquivalente, kurzfristigen Anlagen und finanziellen Verbindlichkeiten auf unsere Gewinn- und Verlustrechnung finden Sie in der Analyse unseres Finanzergebnisses, netto, im Abschnitt Ertragslage (IFRS).

## Analyse der Konzernkapitalflussrechnung

| Mio. €                                 | 2010   | 2009   | Veränderung in %<br>2010 vs. 2009 |
|----------------------------------------|--------|--------|-----------------------------------|
| Cashflows aus betrieblicher Tätigkeit  | 2.932  | 3.015  | -3                                |
| Cashflows aus Investitionstätigkeiten  | -3.994 | -299   | >100                              |
| Cashflows aus Finanzierungstätigkeiten | 2.510  | -2.166 | <-100                             |

Der Mittelzufluss aus laufender Geschäftstätigkeit verringerte sich gegenüber 2009 um 83 Mio. € oder 3 % auf 2.932 Mio. € (2009: 3.015 Mio. €). Allerdings hat sich der operative Cashflow 2009 außerordentlich positiv entwickelt – durch das zurückhaltende Zahlungsverhalten im Jahr 2008 als Folge der Finanzkrise konnten wir insbesondere 2009 zusätzliche Cashinflows verzeichnen. Auszahlungen von 102 Mio. € im Zusammenhang mit dem TomorrowNow-Rechtsstreit wirkten sich 2010 jedoch belastend aus. Durch ein effektives Management des Umlaufvermögens (Working Capital Management) konnten wir diese Entwicklung teilweise kompensieren und die Außenstandsdauer der Forderungen (Days of Sales Outstanding, DSO) reduzieren. Diese Zeitspanne – definiert als durchschnittliche Anzahl der Tage von der Umsatzrealisierung bis zum Zahlungseingang – verringerte sich 2010 um 14 Tage auf 65 Tage (2009: 79 Tage).

Die Mittelabflüsse aus Investitionstätigkeit beliefen sich im Jahr 2010 auf 3.994 Mio. € und lagen damit signifikant über dem Vorjahreswert (2009: 299 Mio. €). Dies ist vornehmlich auf die Zahlung des Kaufpreises zum Erwerb von Sybase zurückzuführen. 2010 investierten wir außerdem 334 Mio. € in unsere Geschäfts- und Technologieinfrastruktur durch den Erwerb von immateriellen Vermögenswerten und Sachanlagen. Ein erheblicher Anteil dieser Investitionen entfiel auf den Kauf von Patenten, Fahrzeugen, Computerhardware und den Bau von Bürogebäuden (2009: 225 Mio. €).

Die Mittelzuflüsse aus Finanzierungstätigkeit betrugen 2010 2.510 Mio. €, gegenüber Mittelabflüssen von 2.166 Mio. € im Jahr 2009. Dabei resultierten die Zuflüsse hauptsächlich aus den Einzahlungen aus unserer Finanzierungstätigkeit im Zusammenhang mit der Akquisition von Sybase. Insgesamt erzielten wir durch Finanzierungstätigkeiten im Jahr 2010 Zuflüsse in Höhe 5.380 Mio. €. Hiervon verwendeten wir 2.196 Mio. € zur teilweisen Rückzahlung des Akquisitionsdarlehens und der ausstehenden Wandelschuldverschreibungen von Sybase. Die Mittelabflüsse im Jahr 2009 resultierten im Wesentlichen aus der Rückzahlung des Darlehens für die Finanzierung der Akquisition von Business Objects. Die Höhe der Dividendenzahlung von 594 Mio. € im Jahr 2010 blieb gegenüber dem Vorjahr unverändert (2009: 594 Mio. €). 2010 kauften wir eigene Aktien im Wert von 220 Mio. € zurück (2009: 0 Mio. €).

#### Kreditlinien

Über verschiedene Kreditlinien stehen uns im Bedarfsfall weitere Kapitalquellen zur Verfügung (wir haben keine saisonalen Effekte zu berücksichtigen):

Wir verfügen über eine revolvingende Kreditlinie über 1,5 Mrd. € mit einer anfänglichen Laufzeit von fünf Jahren, die im Dezember 2015 endet. Die Inanspruchnahme ist nicht an finanzielle Auflagen gebunden. Mittel aus diesem Kredit können für allgemeine Unternehmenszwecke genutzt werden. Die Zinssätze im Fall der Nutzung belaufen sich auf Euro Interbank Offered Rate (EURIBOR) oder London Interbank Offered Rate (LIBOR) für die jeweilige Währung zuzüglich einer Marge von 45 bis 75 Basispunkten in Abhängigkeit von dem in Anspruch genommenen Betrag. Die Bereitstellungsgebühr beträgt 15,75 Basispunkte pro Jahr auf den nicht in Anspruch genom-

menen Betrag. Mit dieser neuen Vereinbarung haben wir eine bestehende Kreditlinie ersetzt, die im November 2012 ausgelaufen wäre. Wir haben die Kreditlinie bisher nicht genutzt und beabsichtigen dies zurzeit auch nicht. Folglich lag eine Inanspruchnahme zum 31. Dezember 2010 nicht vor.

Daneben verfügte die SAP AG zum 31. Dezember 2010 über weitere Kreditlinien in Höhe von insgesamt 545 Mio. €. Eine Inanspruchnahme lag zum 31. Dezember 2010 nicht vor. Mehrere unserer ausländischen Tochterunternehmen verfügen über Kreditlinien, die es ihnen ermöglichen, Kredite in lokaler Währung zum aktuellen Marktzinssatz aufzunehmen, in der Regel in der Höhe, die durch Garantien der SAP AG abgesichert ist. Zum 31. Dezember 2010 standen über diese Vereinbarungen 60 Mio. € zur Verfügung. Insgesamt hatten unsere ausländischen Tochterunternehmen zum 31. Dezember 2010 hiervon 1 Mio. € in Anspruch genommen.

#### Entwicklung der Vermögenslage

##### Bilanzstruktur

Unsere Bilanzsumme hat sich gegenüber dem Vorjahr um 56 % auf 20.841 Mio. € erhöht. Dies resultiert im Wesentlichen aus dem Zugang von Vermögenswerten durch den Erwerb von Sybase und der Aufnahme von Fremdkapital zur Finanzierung des Erwerbs.

##### Konzernbilanzstruktur

Prozent

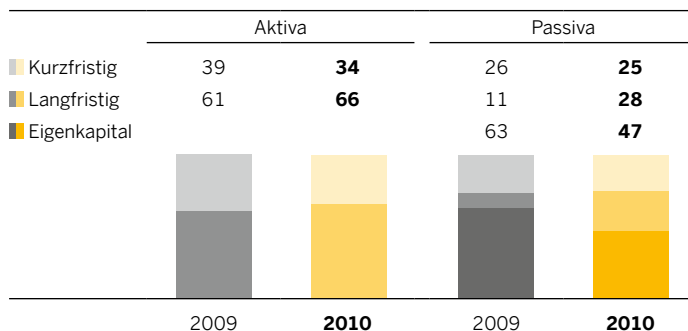

Die kurzfristigen Vermögenswerte haben sich 2010 von 5.255 Mio. € um 36 % auf 7.143 Mio. € erhöht. Dies ist überwiegend bedingt durch einen Anstieg der Zahlungsmittel und Zahlungsmitteläquivalente um 87 % auf 3.518 Mio. € (2009: 1.884 Mio. €) und resultiert im Wesentlichen aus dem operativen Cashflow sowie aus der zusätzlichen Aufnahme von Fremdkapital. Ferner haben sich die Forderungen aus Lieferungen und Leistungen um 553 Mio. € auf 3.099 Mio. € erhöht – ein Anstieg, der insbesondere durch das umsatzstarke vierte Quartal beeinflusst war.

Die langfristigen Vermögenswerte sind mit 13.698 Mio. € im Jahr 2010 gegenüber dem Vorjahr (8.119 Mio. €) signifikant angestiegen. Dies ist überwiegend auf die Aktivierung des Geschäfts- oder Firmenwertes aus der Akquisition von Sybase (3,3 Mrd. €) im Juli 2010 zurückzuführen. Darüber hinaus haben wir aus diesem Erwerb immaterielle Vermögenswerte in Höhe von 1,7 Mrd. € aktiviert. Diese umfassen im Wesentlichen Kundenverträge sowie erworbene Technologie und nicht abgeschlossene Forschungs- und Entwicklungsprojekte. Der Anstieg der Investitionen in Sachanlagen 2010 gegenüber 2009 (2010: 287 Mio. €; 2009: 207 Mio. €) ist im Wesentlichen auf Computerhardware und den Fuhrpark zurückzuführen.

#### Investitionen

Mio. € | Veränderung zum Vorjahr

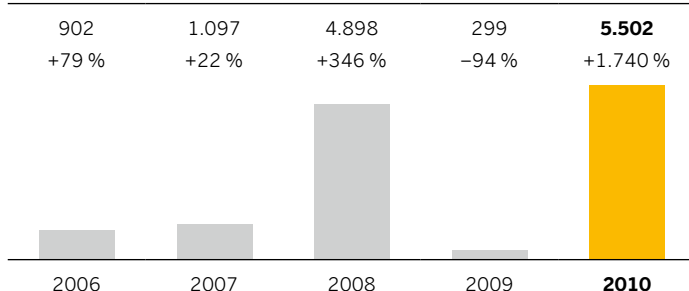

Ferner haben sich die latenten Steueransprüche gegenüber 2009 um 338 Mio. € auf 736 Mio. € erhöht. Die Erhöhung ist im Wesentlichen auf den Steuereffekt aus der Erhöhung der Rückstellung für den TomorrowNow-Rechtsstreit zurückzuführen.

Die Veränderung der kurzfristigen Schulden von 3.416 Mio. € im Jahr 2009 auf 5.149 Mio. € im Jahr 2010 ist vor allem bedingt durch die Erhöhung der Rückstellung im Zusammenhang mit dem TomorrowNow-Rechtsstreit. Bezüglich weiterer Informationen zum Hintergrund dieses Rechtsstreits sowie zur Bilanzierung verweisen wir auf Textziffer (24) im Konzernanhang.

Der Anstieg der langfristigen Schulden (2010: 5.868 Mio. €; 2009: 1.467 Mio. €) ergibt sich im Wesentlichen aus den Finanzierungstätigkeiten, die im Rahmen der Akquisition von Sybase durchgeführt wurden. Weiterhin fand im Oktober 2010 eine Privatplatzierung in den USA statt. Detaillierte Informationen zu den 2010 durchgeführten Finanzierungstransaktionen enthält der Abschnitt Entwicklung der Finanzlage.

Ferner haben sich die latenten Steuerschulden gegenüber 2009 um 388 Mio. € auf 578 Mio. € erhöht. Die Erhöhung resultiert im Wesentlichen aus dem Erwerb von Sybase.

Die Eigenkapitalquote, also der Anteil des Eigenkapitals an der Bilanzsumme, hat sich auf 47 % (2009: 63 %) vermindert – ein Effekt, der in Zusammenhang mit der Aufnahme von Fremdkapital zur Finanzierung des Erwerbs von Sybase zu sehen ist.

#### Eigenkapitalquote

Prozent | Veränderung zum Vorjahr

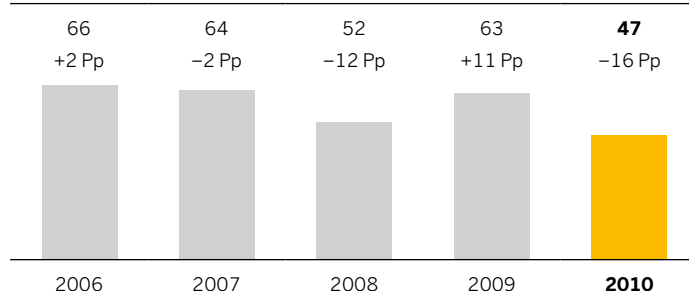

---

### **Nicht bilanzierte Vermögenswerte**

Nicht bilanzierte (immaterielle) Vermögenswerte bilden die Grundlage für unseren gegenwärtigen und zukünftigen Erfolg. In welchem Ausmaß dies der Fall ist, verdeutlicht ein Vergleich zwischen der Marktkapitalisierung der SAP AG, die zum Bilanzstichtag 31. Dezember 2010 46,7 Mrd. € (2009: 40,5 Mrd. €) betrug, und dem bilanziellen Eigenkapital des SAP-Konzerns in Höhe von 9,8 Mrd. € (2009: 8,5 Mrd. €). Diese Differenz ist insbesondere durch solche immateriellen Vermögenswerte zu erklären, die wir nach geltenden Rechnungslegungsvorschriften nicht oder nicht mit ihren Zeitwerten bilanzieren dürfen. Hierzu gehören beispielsweise unser Kundenkapital (SAP-eigener Kundenstamm und SAP-eigene Kundenbeziehungen), unsere Mitarbeiter und ihr Know-how, unser Partnernetzwerk, unsere selbst entwickelte Software, die Innovationsfähigkeit des Unternehmens, die von der SAP gehaltenen Marken, allen voran die Marke SAP, sowie unsere Unternehmensorganisation. SAP war am 31. Dezember 2010 gemessen am Börsenwert – das viertwertvollste Unternehmen Deutschlands. Der Wert der Marke SAP hat sich nach einer Untersuchung von Interbrand und der Zeitschrift BusinessWeek in der Rangliste der weltweit wertvollsten Marken (Top 100 Best Global Brands) von Rang 27 im Vorjahr auf Rang 26 im Jahr 2010 gesteigert. Wir erzielten damit unsere bislang beste Bewertung unter den wertvollsten Marken der Welt. Im Vergleich mit anderen deutschen Markenwerten belegten wir damit hinter den Marken Mercedes-Benz und BMW Rang drei; im internationalen Vergleich mit anderen IT-Unternehmen Rang zehn. Interbrand bewertete die Marke SAP mit 12,8 Mrd. US\$ (2009: 12,1 Mrd. US\$).

Einen wesentlichen Anteil der nicht bilanzierten Vermögenswerte stellen unsere – auch bereits in der Vergangenheit – getätigten Forschungs- und Entwicklungsaufwendungen dar.

Unser Kundenkapital hat sich im Jahr 2010 weiterhin positiv entwickelt. Im abgelaufenen Geschäftsjahr gewannen wir rund 14.000 Neukunden in den verschiedenen Marktsegmenten und haben bestehende Kundenverbindungen vertieft. Gemeinsam mit dem unabhängigen Dienstleister IMAGIN AG messen wir regelmäßig die Zufriedenheit und Treue unserer Kunden. 2010 blieb der Wert der Gesamtzufriedenheit unserer Kunden gegenüber dem Vorjahr nahezu konstant, unsere Weiterempfehlungsrate hingegen hat sich geringfügig verbessert. Weitere Informationen zur Entwicklung unseres Kundenstamms sind im Abschnitt Kunden dargestellt, weitere Informationen zur Kundenzufriedenheit finden Sie in unserem Nachhaltigkeitsbericht unter [www.sapsustainabilityreport.com](http://www.sapsustainabilityreport.com).

Die Maßnahmen zur Wertsteigerung unseres Mitarbeiterstamms und der SAP-eigenen Software erläutern wir in den vorangegangenen Abschnitten zu den Mitarbeitern und zu Forschung und Entwicklung. Mit dem bereits beschriebenen weiteren Ausbau unserer Vertriebs- und Entwicklungspartnerschaften haben wir den Wert unseres Partnernetzwerks gesteigert.

---

## NACHHALTIGKEIT

Nachhaltigkeit ist ein Kernziel der SAP-Strategie und unterstützt uns bei unserem Auftrag, die Abläufe in der Weltwirtschaft zu verbessern. Wir betrachten Nachhaltigkeit als die ganzheitliche Steuerung sozialer, ökologischer und wirtschaftlicher Chancen und Risiken mit dem Ziel, die Wirtschaftlichkeit eines Unternehmens kurz- und langfristig zu verbessern.

Mit Softwarelösungen von SAP können unsere Kunden ihre Nachhaltigkeitsstrategien ganzheitlich umsetzen. Gleichzeitig praktizieren wir als Unternehmen selbst Nachhaltigkeit und setzen uns für einen weltweit fairen und gleichberechtigten Zugang zu wirtschaftlichen Chancen durch die Nutzung von Informationstechnologie ein. Wegen unseres Engagements für Umwelt, Gesellschaft und eine verantwortungsvolle und ethische Unternehmensführung wurden wir in den letzten zehn Jahren stets in den Dow Jones Sustainability Index aufgenommen. Zudem ist die SAP bereits vier Jahre in Folge führendes Unternehmen in der Kategorie der Softwareunternehmen. Darüber hinaus wurden wir in den letzten Jahren immer wieder in führende weltweite Nachhaltigkeitsindizes aufgenommen, beispielsweise in die „Global 100“-Liste der weltweit nachhaltigsten Großunternehmen, den FTSE4Good Index, den Global Challenges Index oder den Nasdaq OMX CRD Global Sustainability 50 Index. In Deutschland waren wir für den Deutschen Nachhaltigkeitspreis 2010 in der Kategorie „Nachhaltigste Zukunftsstrategie“ nominiert.

Unser Nachhaltigkeitsbericht unter [www.sapsustainabilityreport.com](http://www.sapsustainabilityreport.com) beschreibt im Einzelnen, wie wir uns für die Umwelt, die Gesellschaft und die wirtschaftliche Entwicklung engagieren und was wir mit unseren Initiativen konkret bewirken. Auch die Produkte und Dienstleistungen, die unseren Kunden bei der Umsetzung nachhaltiger Geschäftsprozesse helfen, sind dort aufgeführt. Darüber hinaus veröffentlichen wir die folgenden elf Nachhaltigkeitskennzahlen zu unserer ökologischen, gesellschaftlichen und wirtschaftlichen Leistung:

- **Emissionen:** Wir haben uns dazu verpflichtet, unsere Treibhausgasemissionen zum Schutz der Umwelt zu verringern und dadurch dem Klimawandel entgegenzuwirken. Treibhausgasemissionen sind aus unserer Sicht gleichbedeutend mit ineffizienten Abläufen und unnötigen Kosten. Es ist das erklärte Ziel der SAP, die Treibhausgasemissionen bis 2020 auf das Niveau des Jahres 2000 zurückzuschrauben und damit den 2007 gemessenen Emissionsausstoß um etwa 50 % zu reduzieren. Im Jahr 2010 hat SAP insgesamt rund 425 Kilotonnen Treibhausgase produziert und damit den 2009 gemessenen Wert von 450 Kilotonnen um 6 % verringert. Hauptfaktoren für diese Reduktion waren Projekte zur Steigerung der Energieeffizienz in unseren Gebäuden, Veränderungen im Pendelverhalten unserer Mitarbeiter und die verstärkte Nutzung erneuerbarer Energien.
- **Gesamtenergieverbrauch:** Unser Gesamtenergieverbrauch bezeichnet die Energiemenge, die unser Unternehmen selbst produziert oder zugekauft hat (beispielsweise Strom für unsere Gebäude und Rechenzentren oder Treibstoff für unsere Firmenwagen). Für 2010 hatten wir kein Ziel für den Gesamtenergieverbrauch definiert, sondern Teilziele, etwa die Verringerung des Stromverbrauchs in unseren Gebäuden. Durch entsprechende Maßnahmen ist es uns gelungen, den Energieverbrauch von 2.907 Terajoule 2009 auf 2.847 Terajoule 2010 zu reduzieren.
- **Energieverbrauch der Rechenzentren:** Ein weiterer Schwerpunkt liegt darin, die Energieeffizienz unserer Rechenzentren zu erhöhen und den Energieverbrauch pro Mitarbeiter zu senken. 2010 wurden zwei Rechenzentren in Deutschland vom TÜV Rheinland als energieeffizient zertifiziert. Dabei fiel vor allem ins Gewicht, dass unsere Rechenzentren modernste Technologie wie Virtualisierung verwenden und mit optimaler Temperaturregulierung und Klimatisierung ausgestattet sind. So konnten wir den Energieverbrauch in den Rechenzentren von 3.038 Kilowattstunden pro Mitarbeiter im Jahr 2009 auf 2.763 Kilowattstunden 2010 verringern.

- **Anteil von erneuerbaren Energien am Gesamtenergieverbrauch:** SAP verwendet verstärkt Strom aus erneuerbaren Energien. Ein Teil des grünen Stroms stammt entweder von Energieversorgern vor Ort oder von den Photovoltaik-Anlagen auf unseren Gebäuden. Ende 2010 bezogen wir rund 48 % unseres gesamten Stromverbrauchs aus erneuerbaren Energien. 35 % unseres Gesamtverbrauchs ist Ökostrom, den wie aus anderen Quellen einzukaufen, 13 % wird von lokalen Netzbetreibern angeboten.
- **Mitarbeiterfluktuation:** Es ist unser Ziel, die besten Mitarbeiter in der IT-Branche anzuwerben, weiterzuentwickeln und an unser Unternehmen zu binden. Unsere Mitarbeiterfluktuationsrate betrachten wir als wichtigen Erfolgsmesser für unsere Personalpolitik. 2010 betrug die Mitarbeiterfluktuation weltweit 9 %. Dies bedeutet eine Verringerung gegenüber 2009 (11 %), wobei der Vorjahreswert zum Teil durch den Stellenabbau im Zuge der Kostensparmaßnahmen beeinflusst war.
- **Frauen im Management:** Frauen sind in technischen Studiengängen, den Naturwissenschaften und der Informatik deutlich unterrepräsentiert, was sich auch auf die Gleichstellung von Männern und Frauen in der gesamten IT-Branche auswirkt. SAP arbeitet daran, qualifizierte Frauen für das Unternehmen zu gewinnen, zu binden und zu fördern. Ob uns dies wirklich gelingt, sehen wir vor allem am Anteil von Frauen im oberen Management. Der Anteil hat sich mit 11,5 % 2010 gegenüber 11,0 % 2009 nicht wesentlich verändert.
- **Mitarbeiterengagement:** Das Engagement unserer Mitarbeiter ist einer der wichtigsten Indikatoren für unsere Attraktivität als Arbeitgeber und die entscheidende Voraussetzung dafür, dass wir innovative Lösungen auf den Markt bringen können. Diese Kennzahl ist Ausdruck für die Motivation und Loyalität unserer Mitarbeiter, ihren Stolz auf unser Unternehmen und ihre Identifikation mit der SAP. 83 % unserer Mitarbeiter sind stolz darauf, bei SAP zu arbeiten. Dieses erfreuliche Ergebnis erbrachte eine kürzlich

durchgeführte Mitarbeiterumfrage. Doch gleichzeitig fiel das Mitarbeiterengagement 2010 auf 68 % gegenüber 69 % im Jahr 2009. Zwar liegen wir mit 68 % im Branchendurchschnitt; für die SAP war es jedoch das schlechteste Ergebnis seit ihrem Bestehen. Durch einen umfassenden Folgeprozess wollen wir das Mitarbeiterengagement wieder steigern. Die Maßnahmen reichen von Weiterbildung, Workshops, Teamanalysen und Feedbackrunden bis hin zu konkreten Aktionsplänen.

- **Gesundheit:** SAP Health Management hat ein ganzheitliches und umfassendes Gesundheitsprogramm speziell für die Anforderungen unserer Mitarbeiter entwickelt. Es richtet sich gezielt an Menschen, die einer sitzenden Tätigkeit mit hohem intellektuellen Anspruch nachgehen. Der Business Health Culture Index (BHCI) misst die Balance zwischen Stress und Zufriedenheit und ist damit ein Indikator für Unternehmensgesundheit und die Fähigkeit, strategische Ziele zu erreichen. 2010 lag der BHCI bei 59 % im Vergleich zu 61 % im Jahr 2009.
- **Kundenzufriedenheit:** Wir sind fest davon überzeugt, dass der Erfolg der SAP schon immer untrennbar mit dem Erfolg und der Zufriedenheit unserer Kunden verbunden ist. Diese Zufriedenheit messen wir an verschiedenen Indikatoren. Die wichtigste Rolle spielen die Gesamtzufriedenheit unserer Kunden und die Wahrscheinlichkeit, mit der sie uns weiterempfehlen. Auf einer Skala von eins bis zehn liegt die Gesamtzufriedenheit unserer Kunden weltweit mit 7,6 weiterhin auf einem zufriedenstellenden Niveau, verglichen mit dem Vorjahreswert von 7,7. Die Wahrscheinlichkeit einer Weiterempfehlung erhöhte sich 2010 um 0,1 auf insgesamt 8,1. Jedes Jahr analysieren wir außerdem, welche Bereiche besonderer Aufmerksamkeit bedürfen.
- **Software- und softwarebezogene Serviceerlöse und operative Marge:** Diese beiden Nachhaltigkeitsindikatoren erläutern wir ausführlich im Abschnitt Entwicklung der Ertragslage (IFRS).



---

Wie in unserem Nachhaltigkeitsbericht beschrieben, helfen wir Gemeinschaften auf der ganzen Welt, mithilfe von Informationstechnologie wirtschaftliche Chancen zu nutzen. Informationstechnologie ist ein wichtiger Beitrag zur sozialen Innovation, denn sie ermöglicht den fairen Zugang zu Chancen, sei es im Bildungssektor oder in der Wirtschaft.

– **Unterstützung von Gemeinden und Bildungsprojekten:**

SAP spendete 12.844.914 € und leistete rund 59.000 ehrenamtliche Arbeitsstunden in Schulen und Gemeinden. 700 ausgewählte gemeinnützige Organisationen weltweit unterstützten wir mit IT-Lösungen. Im Rahmen unseres University-Alliances-Programms spendeten wir beruflichen Schulen und Universitäten weltweit Softwarelizenzen und erhöhten damit die Karrierechancen von über 200.000 Studierenden im IT-Sektor und der Wirtschaft.

– **Förderung der regionalen wirtschaftlichen Entwicklung:**

Mit unseren Lösungen und unserem Know-how tragen wir in unseren Regionen weltweit zum Aufbau einer Basisinfrastruktur für die wirtschaftliche Entwicklung bei. 2010 flossen unsere Software- und Geldspenden in verschiedene Pilotprojekte: In Ghana setzten wir unsere Initiative für 1.500 Frauen fort, die sich mit der Ernte und Weiterverarbeitung von Shea-Nüssen ihren Lebensunterhalt verdienen. Ziel ist es, eine nachhaltige Wertschöpfungskette aufzubauen, um die Lebensbedingungen der Frauen zu verbessern. Außerdem unterstützten wir die Initiative für Transparenz in der Rohstoffwirtschaft (Extractive Industries Transparency Initiative) in Ghana. Zur Unterstützung des wirtschaftlichen Wiederaufbaus in Haiti engagieren wir uns für die Ausbildung von Jungunternehmern und fördern die Gründung lokaler Betriebe.

Wie unsere Softwarelösungen dazu beitragen, Unternehmensabläufe in ökologischer, gesellschaftlicher und wirtschaftlicher Hinsicht nachhaltig zu verbessern, schildern wir im Abschnitt Software- und Serviceportfolio.

## VERMÖGENS-, FINANZ- UND ERTRAGSLAGE DER SAP AG

Die SAP AG mit Sitz in Walldorf, Baden, ist Mutterunternehmen des 203 Unternehmen umfassenden SAP-Konzerns. Sie übt die Holdingfunktion für den SAP-Konzern aus und beschäftigt die meisten der in Deutschland tätigen Entwicklungs- sowie Service- und Supportmitarbeiter.

Als Inhaberin der meisten SAP-Softwarerechte erzielt die SAP AG ihre Umsatzerlöse hauptsächlich aus den Lizenzgebühren, die die Tochterunternehmen für den Vertrieb von Nutzungsrechten an SAP-Softwarelösungen an die SAP AG als Rechteinhaberin abführen müssen. Dementsprechend trägt sie im Wesentlichen direkt oder indirekt auch die Kosten der Softwareentwicklung im SAP-Konzern.

Die Erstellung des Jahresabschlusses der SAP AG erfolgt gemäß dem Handelsgesetzbuch in der Fassung des Bilanzrechtsmodernisierungsgesetzes (HGB) und dem deutschen Aktiengesetz (AktG). Der vollständige, mit uneingeschränktem Bestätigungsvermerk des Abschlussprüfers versehene Jahresabschluss der SAP AG wird beim Betreiber des elektronischen Bundesanzeigers eingereicht, dort veröffentlicht und von diesem an das Unternehmensregister weitergeleitet. Er kann als Sonderdruck bei der SAP AG angefordert werden.

### Entwicklung der Ertragslage

Die Gewinn- und Verlustrechnung wird nach dem Gesamtkostenverfahren (GKV) aufgestellt. Der Ausweis erfolgt in Millionen Euro (Mio. €).

## Gewinn- und Verlustrechnung SAP AG nach HGB (Kurzfassung)

| Mio. €                                                               | 31.12.2010   | 31.12.2009   |
|----------------------------------------------------------------------|--------------|--------------|
| Umsatzerlöse                                                         | 5.594        | 4.926        |
| Sonstige betriebliche Erträge                                        | 893          | 942          |
| Materialaufwand                                                      | -2.052       | -1.780       |
| Personalaufwand                                                      | -1.058       | -1.129       |
| Abschreibungen auf immaterielle Vermögensgegenstände und Sachanlagen | -208         | -218         |
| Sonstige betriebliche Aufwendungen                                   | -2.128       | -1.608       |
| Betriebsergebnis                                                     | 1.041        | 1.133        |
| Finanzergebnis                                                       | 878          | 1.395        |
| Ergebnis der gewöhnlichen Geschäftstätigkeit                         | 1.919        | 2.528        |
| Außerordentliches Ergebnis                                           | 0            | -7           |
| Steuern                                                              | -417         | -388         |
| <b>Jahresüberschuss</b>                                              | <b>1.502</b> | <b>2.133</b> |

2010 erzielte die SAP AG einen Gesamtumsatz in Höhe von 5.594 Mio. € und damit eine Steigerung von 14 % gegenüber dem Vorjahr (2009: 4.926 Mio. €). Dabei verzeichneten die Produkterlöse einen Zuwachs von 13 % auf 4.578 Mio. € (2009: 4.065 Mio. €). Wie in den Vorjahren resultierten die Produkterlöse in erster Linie aus Lizenzzahlungen von Tochtergesellschaften an die SAP AG. Der Umsatzanstieg ist daher vorrangig auf den Anstieg der Software- und softwarebezogenen Serviceerlöse des SAP-Konzerns zurückzuführen.

Trotz der positiven Umsatzentwicklung verzeichnete das Betriebsergebnis der SAP AG einen leichten Rückgang um 8 % auf 1.041 Mio. € (2009: 1.133 Mio. €). Dieser Rückgang ist im Wesentlichen auf Sondereffekte zurückzuführen, die im Vorjahr unter den sonstigen betrieblichen Erträgen ausgewiesen wurden. 2009 wurden im Rahmen einer konzerninternen Transaktion 407 Mio. € Erträge aus dem Abgang von Anteilen an verbundenen Unternehmen erzielt. Gegenläufig wirkten die um 362 Mio. € höheren Wechselkursgewinne, wodurch sich insgesamt die sonstigen betrieblichen Erträge um 49 Mio. € auf 893 Mio. € (2009: 942 Mio. €) verringerten.

Der Materialaufwand der SAP AG verzeichnete einen Anstieg um 15 % auf 2.052 Mio. € (2009: 1.780 Mio. €). Er besteht aus Leistungen Dritter, die auch konzernintern erbrachte Leistungen von SAP-Tochterunternehmen umfassen. Der Personalaufwand der SAP AG beinhaltet vornehmlich die Personalkosten für die bei der SAP AG beschäftigten Mitarbeiter in Entwicklung, Service und Support sowie Verwaltung. Er sank um 6 % auf 1.058 Mio. € (2009: 1.129 Mio. €). Ursache hierfür sind in erster Linie geringere variable ergebnisabhängige Vergütungsbestandteile. Die sonstigen betrieblichen Aufwendungen der SAP AG erhöhten sich um 32 % auf 2.128 Mio. €. Der Anstieg ergab sich insbesondere aus Wechselkursverlusten, die im Vorjahresvergleich um 521 Mio. € stiegen.

Das Finanzergebnis ging im Vergleich zum Vorjahr um 517 Mio. € zurück. Diese Entwicklung ist in erster Linie auf das Beteiligungsergebnis zurückzuführen. Es liegt mit 767 Mio. € um 536 Mio. € unter dem Vorjahreswert von 1.303 Mio. €, vor allem begründet durch geringere Ausschüttungen von ausländischen Tochterunternehmen. Ein geringeres Zinsergebnis sowie ein per Saldo negatives Ergebnis aus Gewinnabführungsverträgen trugen ebenfalls zum Rückgang bei. Gegenläufig wirkten gesteigerte Erträge aus Wertpapieren des Anlagevermögens.

Insbesondere aufgrund des rückläufigen Finanzergebnisses sank das Ergebnis der gewöhnlichen Geschäftstätigkeit der SAP AG, also die Summe aus Betriebs- und Finanzergebnis, um 24 % auf 1.919 Mio. € (2009: 2.528 Mio. €). Nach Abzug der Steuern verbleibt ein im Vergleich zum Vorjahr um 630 Mio. € geringerer Jahresüberschuss von 1.502 Mio. € (2009: 2.133 Mio. €).

## Entwicklung der Vermögens- und Finanzlage

### Bilanz SAP AG nach HGB (Kurzfassung)

| Mio. €                                                  | 31.12.2010    | 31.12.2009    |
|---------------------------------------------------------|---------------|---------------|
| <b>Aktiva</b>                                           |               |               |
| Immaterielle Vermögensgegenstände                       | 380           | 393           |
| Sachanlagen                                             | 799           | 785           |
| Finanzanlagen                                           | 11.575        | 8.407         |
| Anlagevermögen                                          | 12.754        | 9.585         |
| Vorräte                                                 | 3             | 4             |
| Forderungen und sonstige Vermögensgegenstände           | 3.259         | 2.619         |
| Wertpapiere                                             | 0             | 270           |
| Liquide Mittel                                          | 1.615         | 1.084         |
| Umlaufvermögen                                          | 4.877         | 3.977         |
| Rechnungsabgrenzungsposten                              | 64            | 49            |
| Latente Steuern                                         | 45            | 45            |
| Aktiver Unterschiedsbetrag aus der Vermögensverrechnung | 1             | 1             |
|                                                         | <b>17.741</b> | <b>13.657</b> |
| <b>Passiva</b>                                          |               |               |
| Eigenkapital                                            | 7.137         | 6.270         |
| Rückstellungen                                          | 623           | 720           |
| Verbindlichkeiten                                       | 9.977         | 6.662         |
| Rechnungsabgrenzungsposten                              | 4             | 5             |
|                                                         | <b>17.741</b> | <b>13.657</b> |

Das bilanzielle Gesamtvermögen der SAP AG betrug zum Ende des Jahres 2010 17.741 Mio. €. Der Anstieg resultierte im Wesentlichen aus Zugängen zu den Finanzanlagen sowie einem Anstieg der Forderungen und sonstigen Vermögensgegenstände um 640 Mio. € auf 3.259 Mio. €. Der signifikante Anstieg des Finanzanlagevermögens ergibt sich in erster Linie aus Kapitaleinlagen bei Tochtergesellschaften in Höhe von 3.087 Mio. € im Zusammenhang mit der Akquisition von Sybase.

---

Das Eigenkapital der SAP AG stieg um 14 % auf 7.137 Mio. € (2009: 6.270 Mio. €). Aufgrund der Dividendenzahlung für 2009 in Höhe von 594 Mio. € und der im Jahr 2010 durchgeführten Aktienrückkäufe wurden Abgänge in Höhe von 220 Mio. € verzeichnet. Demgegenüber stehen hauptsächlich ein Zuwachs durch den Jahresüberschuss in Höhe von 1.502 Mio. € sowie Zugänge durch die Ausgabe von Aktien im Rahmen von aktienorientierten Vergütungsprogrammen in Höhe von 179 Mio. €. Der Anstieg der Verbindlichkeiten um 3.316 Mio. € resultiert vor allem aus den Finanzierungstätigkeiten, die im Rahmen der Akquisition von Sybase durchgeführt wurden. Aufgrund des überproportionalen Anstiegs des Fremdkapitals verminderte sich die Eigenkapitalquote, also der Anteil des Eigenkapitals an der Bilanzsumme, auf 40 % (2009: 46 %).

Im Wesentlichen aufgrund geringerer Mittelzuflüsse im Rahmen des zentral über die SAP AG gesteuerten Finanz- und Liquiditätsmanagements sank der Mittelzufluss aus laufender Geschäftstätigkeit im Jahr 2010 um 63 % auf 1.418 Mio. €.

Der Mittelabfluss aus Investitionstätigkeit hat sich im Jahr 2010 um 1.489 Mio. € auf 2.707 Mio. € (2009: 1.218 Mio. €) erhöht. Der Anstieg wurde vornehmlich durch die angesprochenen Kapitaleinlagen bei Tochtergesellschaften im Zusammenhang mit der Sybase-Akquisition verursacht.

Der Mittelzufluss aus Finanzierungstätigkeit betrug 2010 2.220 Mio. € gegenüber einem Mittelabfluss von 2.168 Mio. € im Jahr 2009. Die Zuflüsse im Jahr 2010 resultierten hauptsächlich aus den Erträgen der Finanzierungstätigkeit im Zusammenhang mit der Akquisition von Sybase. Die Mittelabflüsse im Jahr 2009 ergaben sich im Wesentlichen aus der Rückzahlung des Darlehens für die Finanzierung der Akquisition von Business Objects. Die Höhe der Dividendenzahlung von 594 Mio. € im Jahr 2010 blieb gegenüber dem Vorjahr unverändert (2009: 594 Mio. €). 2010 wurden eigene Aktien im Wert von 220 Mio. € zurückgekauft (2009: 0 Mio. €).

Der Bestand an kurzfristigen liquiden Mitteln der SAP AG betrug am Ende des Geschäftsjahres 1.615 Mio. € und liegt damit um 136 % über dem Vorjahresbestand von 684 Mio. €.

### **Risiken**

Die SAP AG unterliegt im Wesentlichen den gleichen Risiken und Chancen wie der SAP-Konzern. Weitere Informationen hierzu finden Sie im Risikobericht.

---

## **GESAMTAUSSAGE ZUR WIRTSCHAFTLICHEN LAGE DER SAP**

### **Beurteilung der wirtschaftlichen Lage durch den Vorstand**

Die Umsatzerlöse, der Auftragseingang sowie die operative Marge der SAP entwickelten sich im Geschäftsjahr 2010 sehr positiv. Hierzu trug neben internen Maßnahmen auch der weltweite wirtschaftliche Aufschwung bei. SAP zeigt sich somit weiterhin in wirtschaftlich gesunder Verfassung.

2010 beendeten wir sowohl mit dem höchsten Softwareumsatz als auch dem höchsten Gesamtumsatz eines vierten Quartals in der Geschichte der SAP. Wir haben sehr großes Wachstum in allen Regionen und Kundensegmenten erreicht. Dieses Ergebnis ist eine klare Bestätigung, dass unsere Ausrichtung auf Innovation und Mehrwert für Kunden die richtige Strategie ist. Im Geschäftsjahr 2010 konnten wir unseren veröffentlichten Ausblick für die Wachstumsrate der Software- und software-bezogenen Serviceerlöse (Non-IFRS) sogar übertreffen. Maßgebliche Faktoren hierfür waren unser weitreichendes und innovatives Lösungsportfolio, unsere hoch qualifizierten und motivierten Mitarbeiter, die starke Marktstellung der SAP, effiziente Unternehmensprozesse und eine robuste Profitabilitäts- und Liquiditätssituation.

Im Geschäftsjahr 2010 setzten wir unsere Strategie fort, gezielte Akquisitionen (unter anderem mit der Akquisition von Sybase) zur funktionalen Erweiterung unseres Portfolios zu tätigen. Wir verfügen über eine stabile finanzielle Basis, die uns auch in Krisenzeiten ein flexibles Handeln ermöglicht.

### **Einfluss der Bilanzpolitik auf die wirtschaftliche Lage**

Ausführliche Informationen zu unseren Bilanzierungs- und Bewertungsmethoden finden Sie unter Textziffer (3) im Konzernanhang.

Außerbilanzielle Finanzierungsinstrumente wie Sale-and-Lease-Back-Transaktionen, Forderungsverkäufe, Asset Backed Securities oder Haftungsverhältnisse gegenüber Zweckgesellschaften, die nicht in den Konzernabschluss einbezogen sind, sind ihrem Umfang nach unwesentlich.

---

## **CORPORATE GOVERNANCE**

### **Erklärung zur Unternehmensführung**

Börsennotierte Aktiengesellschaften haben nach § 289a HGB eine Erklärung zur Unternehmensführung entweder in ihren Lagebericht aufzunehmen oder auf der Internetseite der Gesellschaft öffentlich zugänglich zu machen. Der Vorstand der SAP AG hat die Erklärung zur Unternehmensführung am 2. März 2011 abgegeben und auf der Internetseite der SAP veröffentlicht. Auf die unter [www.sap.com/germany/about/governance/ezu](http://www.sap.com/germany/about/governance/ezu) veröffentlichte Erklärung wird hiermit Bezug genommen.

Weitere Informationen über unsere Corporate Governance finden Sie im Corporate-Governance-Bericht, der in diesem Geschäftsbericht enthalten ist.

---

## ÜBERNAHMERELEVANTE ANGABEN

Angaben nach § 289 Abs. 4 und § 315 Abs. 4 HGB und erläuternder Bericht:

- **Zusammensetzung des gezeichneten Kapitals:** Das Grundkapital der SAP AG zum 31. Dezember 2010 betrug 1.226.822.697 € und war eingeteilt in 1.226.822.697 Stück nennwertlose Stammaktien. SAP-Aktien sind Stückaktien, die auf den Inhaber lauten. Auf jede Aktie entfällt ein rechnerischer Nennwert von 1 €. Eine Stammaktie gewährt jeweils eine Stimme. In den USA sind unsere Aktien in Form von American Depositary Receipts (ADRs) notiert. ADRs sind Hinterlegungsscheine nicht amerikanischer Aktien, die an den US-Börsen anstelle der Originalaktien gehandelt werden, wobei jeweils ein SAP-ADR eine SAP-Aktie repräsentiert.
- **Beschränkungen, die Stimmrechte oder die Übertragung von Aktien betreffen:** SAP-Aktien sind nicht vinkuliert. Ausgenommen hiervon sind Aktien im Rahmen unseres neuen Mitarbeiteraktienprogramms SAP Share Matching Plan (SMP), für die eine Haltefrist gilt (siehe unten). SAP hielt zum 31. Dezember 2010 39.166.641 eigene Aktien. Aus eigenen Aktien standen uns keine Rechte und damit auch keine Stimm- und Dividendenrechte zu. Aktien, die 2010 im Rahmen des Mitarbeiteraktienprogramms SAP SMP ausgegeben wurden, unterliegen einer privatrechtlichen Veräußerungssperre von drei Jahren, soweit das Beschäftigungsverhältnis mit SAP nicht früher beendet wird. Vor Ablauf dieser Haltefrist dürfen die so erworbenen Aktien von den begünstigten Mitarbeitern grundsätzlich nicht veräußert werden. Sonstige Beschränkungen, die Stimmrechte oder die Übertragung von Aktien betreffen, sind uns nicht bekannt.
- **Beteiligungen am Kapital, die 10 % der Stimmrechte überschreiten:** Uns sind keine direkten oder indirekten Beteiligungen am Kapital der SAP AG bekannt, die 10 % der Stimmrechte überschreiten. Der Gründeraktionär und Aufsichtsratsvorsitzende Hasso Plattner hielt zum 31. Dezember 2010 durch direkte und (über von ihm beherrschte Gesellschaften und Stiftungen) indirekte Beteiligungen einen Anteil von 9,956 % am Grundkapital der SAP AG. Ergänzend sei darauf hingewiesen, dass rund 3,73 % des Grundkapitals der SAP AG von der Deutsche Bank Trust Company Americas treuhänderisch gehalten werden, um einen Handel mit ADRs an der New York Stock Exchange (NYSE) zu ermöglichen.
- **Aktien mit Sonderrechten, die Kontrollbefugnisse verleihen:** Kein SAP-Aktionär verfügt über Sonderrechte, die ihm Kontrollbefugnisse verleihen.
- **Art der Stimmrechtskontrolle, wenn Mitarbeiter am Kapital beteiligt sind und ihre Kontrollrechte nicht unmittelbar ausüben:** Mitarbeiter, die SAP-Aktien halten, üben ihre Kontrollrechte wie andere Aktionäre nach Maßgabe der gesetzlichen Vorschriften und der Satzung aus. Arbeitnehmervertreter in unserem Aufsichtsrat dürfen – wie alle anderen Aufsichtsratsmitglieder – bei Abstimmungen in der Hauptversammlung über ihre Entlastung keine Stimmrechte aus von ihnen gehaltenen SAP-Aktien ausüben.
- **Gesetzliche Vorschriften und Bestimmungen der Satzung über die Ernennung und Abberufung von Vorstandsmitgliedern und über die Änderung der Satzung:** Die Voraussetzungen für die Ernennung und Abberufung der Mitglieder des Vorstands sowie die Änderung der Satzung richten sich nach den einschlägigen Regelungen des Aktiengesetzes. Nach der Satzung der SAP AG besteht unser Vorstand aus mindestens zwei Mitgliedern, die gemäß § 84 AktG durch den Aufsichtsrat für eine Zeit von maximal fünf Jahren bestellt werden. Die Zahl der Vorstandsmitglieder wird vom Aufsichtsrat festgelegt. Eine wiederholte Bestellung oder Verlängerung der Amtszeit, jeweils für höchstens fünf Jahre, ist zulässig. Nach dem Mitbestimmungsgesetz (§ 31) ist für die Bestellung von Vorstandsmitgliedern eine Mehrheit von mindestens zwei Dritteln der Mitglieder des Aufsichtsrats erforderlich. Kommt hiernach eine Bestellung nicht zustande, so hat der Vermittlungsausschuss innerhalb eines Monats dem Aufsichtsrat einen Vorschlag für die Bestellung zu machen. Der Aufsichtsrat bestellt dann die Mitglieder des Vorstands mit der einfachen Mehrheit der Stimmen seiner Mitglieder. Kommt auch hiernach eine Bestellung nicht zustande, so hat bei einer erneuten Abstimmung der Aufsichtsratsvorsitzende zwei Stimmen. Der Aufsichtsrat kann aus dem Kreis der Vorstandsmitglieder einen Vorstandsvorsitzenden und einen oder mehrere stellvertretende Vorstandsvorsitzende ernennen. Die Bestellung zum Vorstand kann gemäß § 84 AktG durch den Aufsichtsrat widerrufen werden, wenn in Bezug auf das Vorstandsmitglied ein wichtiger Grund, etwa eine grobe Pflichtverletzung, vorliegt. Fehlt ein erforderliches Vorstandsmitglied, so kann gemäß § 85 AktG in dringenden Fällen eine gerichtliche Bestellung erfolgen. Die Änderung unserer Satzung erfolgt gemäß §§ 179, 133 AktG durch einen Beschluss der Hauptversamm-

---

lung mit einer Mehrheit von mindestens drei Vierteln des bei der Abstimmung vertretenen Grundkapitals. Die Befugnis zu Änderungen, die nur die Fassung betreffen, ist gemäß § 11 Abs. 2 der Satzung dem Aufsichtsrat übertragen worden.

- **Befugnisse des Vorstands, Aktien auszugeben oder zurückzukaufen:** Die Hauptversammlung am 8. Juni 2010 hat den Vorstand ermächtigt, mit Zustimmung des Aufsichtsrats das Grundkapital durch Ausgabe neuer Aktien gegen Geldeinlagen um bis zu 250 Mio. € und gegen Geld- oder Sacheinlagen um bis zu weitere 250 Mio. € zu erhöhen. Diese genehmigten Kapitalien können bis zum 7. Juni 2015 ausgenutzt werden. Detaillierte Informationen zu den einzelnen genehmigten Kapitalien ergeben sich aus § 4 der Satzung. Die Hauptversammlung am 8. Juni 2010 hat den Vorstand des Weiteren gemäß § 71 Abs. 1 Nr. 8 AktG ermächtigt, bis zum 30. Juni 2013 SAP-Aktien mit einem anteiligen Betrag am Grundkapital von insgesamt bis zu 120 Mio. € zu erwerben. Diese Ermächtigung ist mit der Maßgabe verbunden, dass auf die zu erwerbenden Aktien zusammen mit anderen SAP-Aktien, die die SAP bereits erworben hat oder noch besitzt oder die ihr zuzurechnen sind, nicht mehr als 10 % des Grundkapitals entfallen. Unser Vorstand ist außerdem befugt, bis zum 8. Mai 2011 Wandel- und Optionsschuldverschreibungen mit Recht auf Wandlung oder Bezug von SAP-Aktien mit einem anteiligen Betrag des Grundkapitals von insgesamt bis zu 100 Mio. € auszugeben, die durch entsprechende bedingte Kapitalien gesichert sind. Die vorstehenden Befugnisse des Vorstands zur Ausgabe und zum Rückkauf von Aktien und zur Ausgabe von Rechten auf Wandlung oder Bezug von SAP-Aktien sind bei mit der SAP vergleichbaren deutschen Unternehmen weitgehend üblich. Sie gewähren dem Vorstand die notwendige Flexibilität und eröffnen ihm insbesondere die Möglichkeit, SAP-Aktien als Gegenleistung beim Beteiligungserwerb einzusetzen, Finanzmittel am Kapitalmarkt kurzfristig und zu günstigen Konditionen aufzunehmen oder unterjährig Liquidität an die Aktionäre zurückzuführen. Für das 2010 neu aufgelegte Mitarbeiteraktienprogramm (SAP Share Matching Plan) wurde zusätzlich ein neues genehmigtes Kapital geschaffen, das den Vorstand ermächtigt, mit Zustimmung des Aufsichtsrats neue Aktien an die Teilnehmer des Plans mit einem anteiligen Betrag am Grundkapital von insgesamt bis zu 30 Mio. € auszugeben. Darüber hinaus bestehen weitere bedingte Kapitalien, die der Erfüllung von Wandlungs- und Bezugsrechten dienen, die im Rahmen von aktienorientierten Vergütungsprogrammen

gewährt wurden. Die hierzu beschlossenen bedingten Kapitalien beliefen sich zum 31. Dezember 2010 noch auf insgesamt 106.917.972 €. Zum 31. Dezember 2010 waren insgesamt 5.727.750 Wandlungs- und Bezugsrechte an Teilnehmer der aktienorientierten Vergütungsprogramme ausgegeben, die infolge der im Dezember 2006 durchgeführten Kapitalerhöhung aus Gesellschaftsmitteln jeweils zum Bezug von vier neuen Aktien aus bedingtem Kapital berechtigen. SAP ist allerdings berechtigt, diese Rechte alternativ mit eigenen Aktien zu bedienen. Aktienoptionen mit Rechten auf Bezug von Aktien der SAP AG aus den hierfür geschaffenen bedingten Kapitalien wurden nur bis zum Jahr 2006 ausgegeben.

- **Wesentliche Vereinbarungen, die unter der Bedingung eines Kontrollwechsels infolge eines Übernahmeangebots stehen:** Die SAP AG hat die im Folgenden aufgeführten wesentlichen Vereinbarungen abgeschlossen, die Regelungen für den Fall eines Kontrollwechsels etwa infolge eines Übernahmeangebots beinhalten:
  - Der Vertrag über die syndizierte Kreditlinie der SAP in Höhe von 1,5 Mrd. € (siehe Textziffer (26) im Konzernanhang) enthält eine Klausel für den Fall des Kontrollwechsels, eine sogenannte Change-of-Control-Klausel. Diese verpflichtet die SAP AG, den Banken anzuzeigen, falls sie erfährt, dass eine Person oder gemeinsam handelnde Personen im Sinne des Wertpapiererwerbs- und Übernahmegesetzes direkt oder indirekt mehr als 50 % der stimmberechtigten Aktien erworben haben. Nach Erhalt der Anzeige besteht bankenseitig das Recht, die Kreditlinie aufzuheben und die vollständige Rückzahlung der ausstehenden Verbindlichkeiten zu fordern, wenn Banken, die mindestens zwei Drittel des Kreditvolumens repräsentieren, die Kündigung verlangen. Wird keine Fortsetzungsvereinbarung getroffen, werden die Aufhebung der Kreditlinie und der Eintritt der Rückzahlungsverpflichtung zu einem näher geregelten Zeitpunkt wirksam.
  - Die Verträge über die Schuldscheine der SAP in Höhe von 697 Mio. € (siehe Textziffer (18b) im Konzernanhang) enthalten ebenfalls eine Change-of-Control-Klausel. Auch diese Klausel gibt den beteiligten Kreditgebern die Möglichkeit einer außerordentlichen Kündigung, falls eine Person oder gemeinsam handelnde Personen im Sinne des Wertpapiererwerbs- und Übernahmegesetzes direkt oder



- indirekt mehr als 50 % der stimmberechtigten SAP-Aktien erworben haben. Kommt nach Eintritt des Kontrollwechsels innerhalb eines Zeitraums von 30 Tagen keine Fortsetzungsvereinbarung zustande, sind die Kreditgeber berechtigt, das Darlehen fällig zu stellen und die unverzügliche Rückzahlung des offenen Kreditbetrags zu fordern.
- In Vereinbarungen zwischen der SAP AG und verschiedenen Banken über bilaterale Kreditlinien, die zum 31. Dezember 2010 einen Umfang von insgesamt 545 Mio. € hatten, haben wir den Banken im Rahmen von sogenannten Material-Adverse-Change-Klauseln ein Kündigungsrecht für den Fall eingeräumt, dass sich die wirtschaftlichen Verhältnisse der SAP AG wesentlich verschlechtern. Es kann nicht ausgeschlossen werden, dass es im Zusammenhang mit einem Kontrollwechsel im Einzelfall zu einer solchen Verschlechterung kommt. Die betreffenden Klauseln sind marktüblich. Die bilateralen Kreditlinien wurden in der Vergangenheit nur in Einzelfällen für wenige Tage in Anspruch genommen. Bei der gegebenen Liquiditätssituation der SAP AG hätte eine Kündigung der vorgenannten Kreditlinien daher voraussichtlich – jedenfalls kurzfristig – keine wesentliche Auswirkung.
  - Zur Finanzierung der Akquisition von Sybase hat SAP eine syndizierte Kreditlinie über 2,75 Mrd. € abgeschlossen (siehe Textziffer (18b) im Konzernanhang), die zum 31. Dezember 2010 noch mit 1 Mrd. € valutiert. Im Falle eines Kontrollwechsels sind die Gläubiger berechtigt, den Kreditvertrag zu kündigen und die Rückzahlung des ausstehenden Darlehens zu verlangen, wenn nicht auf Anfrage der SAP innerhalb eines Zeitraums von 30 Tagen eine Fortsetzungsvereinbarung mit einer Mehrheit der Kreditgeber zustande kommt.
  - SAP hat 2010 zwei Anleihen, aufgeteilt in je zwei Tranchen mit unterschiedlichen Laufzeiten, in Höhe von insgesamt 2,2 Mrd. € begeben (siehe Textziffer (18b) im Konzernanhang). Aufgrund der Vereinbarungen mit den Erwerbern der Anleihe sind wir verpflichtet, diesen unverzüglich den Eintritt eines Kontrollwechsels anzuzeigen. Die Erwerber der Schuldverschreibungen haben im Falle eines Kontrollwechsels und einer damit verbundenen Absenkung des Ratings der SAP innerhalb eines definierten Zeitraums das Recht, die Rückzahlung ihrer Schuldverschreibungen zu verlangen. Derzeit verfügen wir über kein Kreditrating einer Ratingagentur. Sollte dieser Zustand auch im Falle eines Kontrollwechsels bestehen, gelten die Bedingungen für eine vorzeitige Rückzahlung nur als

- eingetreten, wenn keine Ratingagentur während des Kontrollwechselzeitraums ein Kreditrating vergibt.
- In den Verträgen über unsere Privatplatzierung in den USA in Höhe von insgesamt 500 Mio. US\$ (siehe Textziffer (18b) im Konzernanhang) haben wir uns verpflichtet, den Gläubigern die Rückzahlung der ausstehenden Darlehenssumme anzubieten, falls ein Kontrollwechsel und eine damit verbundene Absenkung unseres Ratings innerhalb eines definierten Zeitraums eintritt. Die Gläubiger können dieses Angebot innerhalb von 30 Tagen annehmen. Derzeit verfügen wir über kein Kreditrating einer Ratingagentur. Sollte dieser Zustand auch im Falle eines Kontrollwechsels bestehen, gelten die Bedingungen für eine vorzeitige Rückzahlung nur als eingetreten, wenn keine Ratingagentur während des Kontrollwechselzeitraums ein Kreditrating vergibt.
  - Die SAP hat verschiedene Kooperationen mit anderen Unternehmen abgeschlossen, um gemeinsam neue Softwareprodukte zu entwickeln und zu vermarkten. Diese gemeinsamen Entwicklungs- und Vermarktungsaktivitäten sind in entsprechenden Verträgen mit den Kooperationspartnern fixiert. Einige dieser Verträge enthalten Change-of-Control-Klauseln, wonach im Fall des Kontrollwechsels die betroffene Partei die Zustimmung der anderen Partei zur Übertragung des Kooperationsvertrags benötigt oder die andere Partei den Kooperationsvertrag kündigen kann.
  - **Entschädigungsvereinbarungen, die für den Fall eines Übernahmeangebots mit Vorstandsmitgliedern oder Arbeitnehmern getroffen sind:** Es bestehen Vereinbarungen mit den Mitgliedern des Vorstands zur Entschädigung im Fall eines Kontrollwechsels. Diese Vereinbarungen, die national und international üblich sind, sind im Vergütungsbericht beschrieben, der integraler Bestandteil dieses Lageberichts ist. Vergleichbare Entschädigungsvereinbarungen mit Mitarbeitern bestehen nicht.

---

## RISIKOBERICHT

### **Internes Kontroll- und Risikomanagement-System**

Als weltweit agierendes Unternehmen sind wir im Rahmen unserer breit gefächerten Geschäftstätigkeit verschiedenen Risiken ausgesetzt. Wir verfügen über ein umfassendes Risikomanagement-System, mit dem wir Risiken frühzeitig erkennen, analysieren und geeignete Gegenmaßnahmen ergreifen können. Im weitesten Sinne dient dieses System dazu, potenzielle Ereignisse zu erkennen, die den Konzern gefährden könnten. Daneben soll es hinreichende Sicherheit darüber gewährleisten, dass die Ziele des Konzerns, vor allem finanzielle, operative oder strategische Ziele, wie geplant erreicht werden können. Das Risikomanagement-System ist als integraler Bestandteil unserer Geschäftsprozesse unternehmensweit implementiert, umfasst eine Vielzahl von Kontrollmechanismen und ist ein wesentliches Element der unternehmerischen Entscheidungsprozesse. Es beinhaltet unter anderem die Erfassung, Überwachung und Steuerung der internen und externen Risiken, diverse Management- und Kontrollsysteme, einen konzernweit einheitlichen Planungsprozess sowie eine umfassende Risikoberichterstattung. Um die Effektivität unseres Risikomanagements sicherzustellen und die Aggregation von Risiken sowie eine transparente Berichterstattung zu ermöglichen, haben wir uns für einen unternehmensweit einheitlichen, integrierten Ansatz zum Management von Unternehmensrisiken entschieden. Daher ist das Risikomanagement unternehmensweit in der Organisation Global Governance, Risk, and Compliance (GRC) mit direkter Berichtslinie zum Finanzvorstand der SAP AG zusammengefasst. Eine Ausnahme bildet unsere Tochtergesellschaft Sybase, bei der die interne Revision dafür zuständig ist, das Risikomanagement unter Beachtung der bei SAP geltenden Richtlinien und Grenzwerte durchzuführen. Die GRC-Organisation hat den Auftrag:

- kontinuierlich die Risiken aller wesentlichen Geschäftstätigkeiten mittels eines einheitlichen methodischen Ansatzes zu identifizieren und zu bewerten,
- die Umsetzung und Effektivität der festgelegten Gegensteuerungsmaßnahmen zu überwachen,
- der Unternehmensleitung regelmäßig über Risiken zu berichten,
- die Risiken mit der globalen Versicherungsstrategie der SAP abzustimmen,
- Sicherheitsrichtlinien zu erlassen und zu implementieren sowie

- die Einhaltung der Vorschriften zur Einrichtung und Überwachung eines effektiven internen Kontrollsystems sicherzustellen.

Als in Deutschland ansässige Aktiengesellschaft, deren Wertpapiere an einer US-amerikanischen Börse notiert sind, unterliegt die SAP deutschen und US-amerikanischen Rechtsvorschriften zum Risikomanagement, etwa § 91 Abs. 2 AktG oder Section 404 des Sarbanes-Oxley Act. Der Vorstand hat ein Überwachungssystem eingerichtet, um die Einhaltung dieser Vorschriften sicherzustellen, und ist für dessen Ausgestaltung und Wirksamkeit verantwortlich. Die Überwachung unseres Risikomanagement-Systems obliegt – wie auch die Überwachung des internen Kontrollsystems – dem Prüfungsausschuss des Aufsichtsrats. Außerdem prüft unser Abschlussprüfer jährlich, ob unser Risikofrüherkennungssystem geeignet ist, für die SAP bestandsgefährdende Risiken frühzeitig zu erkennen.

### **Risikomanagement-System**

Unser Risikomanagement-System wurde entwickelt, um operative, finanzielle, strategische Risiken und Risiken der Nichteinhaltung von Vorschriften (Compliance-Risiken) abzudecken. Es besteht aus fünf Hauptbestandteilen:

- der globalen Risikomanagement-Organisation,
- einer unternehmensweiten Risikomanagement-Richtlinie,
- einem unternehmensweit einheitlichen Risikomanagement-Prozessmodell, das die wesentlichen Elemente Risikoplanung, Risikoidentifikation, Risikoanalyse, Risikobehandlung und Risikoüberwachung umfasst,
- einer unternehmensweit implementierten Software für die Unterstützung der Risikomanagement-Prozesse und
- einer unternehmensweit standardisierten Risikoberichterstattung.

Allen wesentlichen Unternehmensbereichen, einschließlich Sybase, sowie den Landesgesellschaften der SAP ist ein GRC-Mitarbeiter, in der Regel ein Risikomanager, zugeordnet. Ziel ist es, ein weltweit einheitliches Risikomanagement in enger Zusammenarbeit mit GRC zu gewährleisten. Unterstützt werden die Mitarbeiter der GRC-Organisation hierbei vom regionalen und globalen Management. Die Organisation stellt die Umsetzung und Einhaltung der Risikomanagement-Richtlinie sicher. Ein neu gegründetes Team innerhalb von GRC befasst sich darüber hinaus mit strategischen Risiken.

---

Die vom SAP-Vorstand erlassene Risikomanagement-Richtlinie regelt den Umgang mit Risiken innerhalb der SAP und definiert eine konzerneinheitliche Methodik, die in allen Bereichen der SAP gültig ist. Darin werden Verantwortlichkeiten für die Durchführung der Risikomanagement-Aktivitäten sowie Berichts- und Überwachungsstrukturen festgelegt. Die Richtlinie wird laufend überprüft und bei Bedarf angepasst. Die interne Revision der SAP (Global Internal Audit Service, GIAS) überwacht ihre Umsetzung und Einhaltung durch gezielte Prüfungen. Die wesentlichen Inhalte der Richtlinie (Risikoplanung, Risikoidentifikation, Risikoanalyse, Risikobehandlung und Risikoüberwachung) sind im Folgenden beschrieben.

Risikoplanung und Risikoidentifikation werden gemeinsam vom Risikomanager und von der betreffenden Unternehmenseinheit oder Landesgesellschaft durchgeführt. Zur Identifikation von Risiken verwenden wir verschiedene Techniken. Auf Basis der Risikoplanung und -identifikation schätzen GRC und der jeweilige Unternehmensbereich im Rahmen der Risikoanalyse die Eintrittswahrscheinlichkeit sowie die potenzielle Schadenhöhe der Risiken ein und verwenden hierzu unternehmensweit einheitliche Methoden. Entsprechend der geschätzten Eintrittswahrscheinlichkeit und Schadenhöhe wird das Risiko als „hoch“, „mittel“ oder „gering“ klassifiziert. Zusätzlich verwenden wir weitere Risikoberechnungsverfahren wie zum Beispiel Sensitivitätsanalysen und Simulationstechniken.

Auf die Risikoanalyse folgen Risikobehandlung und -überwachung. Die Risikosteuerung liegt in der Verantwortung der jeweiligen Geschäftsbereiche. Eine enge Zusammenarbeit von GRC mit den Risikoverantwortlichen stellt die Umsetzung effektiver Strategien zur Risikominimierung sicher. Hierbei können Risiken entweder durch das Ergreifen aktiver Gegenmaßnahmen verringert, aber auch in einigen Fällen akzeptiert werden. Aufgrund kontinuierlicher Risikoüberwachung ist GRC in der Lage, wirksame Maßnahmen zur Risikoeindämmung zu identifizieren und deren Durchführung zu begleiten. Auch neue Risiken können im Zuge der Überwachung erkannt werden. Wir sichern Risiken nur dann durch Versicherungen ab, wenn wir dies im Hinblick auf den wirtschaftlichen Nutzen für sinnvoll halten.

Um Transparenz hinsichtlich aller im Unternehmensverbund vorhandenen Risiken zu schaffen und zusätzlich das Management der Risiken sowie das Berichtswesen zu erleichtern, verwenden wir eine eigene Risikomanagement-Software. Identifizierte Risiken werden in unserer SAP-Software festgehalten

und nachverfolgt. Im Rahmen der vierteljährlichen Risikoberichterstattung konsolidieren und aggregieren wir die in unserer Softwarelösung gespeicherten Risikomanagement-Informationen. Die Softwarelösung unterstützt hierbei auch den risikobasierten Ansatz unseres internen Kontroll- und Risikomanagement-Systems für die Rechnungslegung (IKRMS).

Die Verantwortlichen auf lokaler, regionaler und globaler Ebene werden gemäß der globalen Risikomanagement-Richtlinie über alle identifizierten und relevanten Risiken informiert. Auf regionaler und globaler Ebene sind sogenannte Executive Risk Councils eingerichtet, deren Mitglieder regelmäßig Risiken und Gegenmaßnahmen diskutieren. Der Vorstand wird nach festgelegten Kriterien über Risiken unterrichtet, die er im Bedarfsfall selbst überwacht. Über wesentliche Risiken, die definierte Grenzwerte überschreiten oder signifikante Auswirkungen haben könnten, werden außerdem der Vorsitzende des Aufsichtsrats und des Prüfungsausschusses unterrichtet. Darüber hinaus werden potenziell bestandsgefährdende Risiken hinsichtlich einer möglichen Bestandsgefährdung detailliert analysiert und dem Vorstand sowie dem Aufsichtsrat gegebenenfalls ad hoc gemeldet.

### **Chancenmanagement**

Die SAP agiert in einem dynamischen Marktumfeld, in dem sich ständig neue Chancen eröffnen. Diese systematisch zu erkennen und zu nutzen – und dabei unnötige Risiken zu vermeiden – ist ein wesentlicher Faktor für das nachhaltige Wachstum unseres Unternehmens. Daher sind Chancen- und Risikomanagement bei der SAP eng miteinander verknüpft. Bei Chancen handelt es sich um interne und externe Potenziale, die sich positiv auf das Unternehmen auswirken können. Unser Chancenmanagement orientiert sich eng an unserer Strategie für nachhaltiges Wachstum.

Um ein erfolgreiches Chancenmanagement zu ermöglichen, beschäftigen wir uns umfassend mit Markt- und Wettbewerbsanalysen, Umfeldszenarien, der Ausrichtung unseres Produktportfolios, den Kostentreibern sowie den kritischen Erfolgsfaktoren unserer Branche. Daraus werden konkrete Marktchancen abgeleitet, die der Vorstand im Rahmen der Geschäftsplanung und der Zielvereinbarungen mit dem operativen Management abstimmt.

---

Grundsätzlich verfolgt die SAP einen Ansatz, der Chancen und Risiken in einem angemessenen Verhältnis berücksichtigt.

### **Internes Kontroll- und Risikomanagement-System für die Konzernrechnungslegung und die Rechnungslegung der SAP AG**

Unser internes Kontroll- und Risikomanagement-System für die Rechnungslegung (IKRMS) ist in das unternehmensweite Risikomanagement-System der SAP eingebettet. Es umfasst die Organisations- sowie Kontroll- und Überwachungsstrukturen, mit denen wir gewährleisten, dass unternehmerische Sachverhalte gesetzmäßig erfasst, aufbereitet und gewürdigt sowie anschließend in den IFRS-Konzernabschluss und den Einzelabschluss der SAP AG gemäß HGB übernommen werden.

Darüber hinaus stellen wir mithilfe des IKRMS sicher, dass unsere Rechnungslegung den einschlägigen Gesetzen und Normen entspricht. Hierzu analysieren wir neue Gesetze, Rechnungslegungsstandards und andere Verlautbarungen, deren Nichtbeachtung ein wesentliches Risiko für die Ordnungsmäßigkeit unserer Rechnungslegung darstellt. Unternehmenseitig geltende Regelungen kodifizieren wir in Richtlinien, wie zum Beispiel der konzernweit gültigen Bilanzierungsrichtlinie und der Umsatzrealisierungsrichtlinie. Diese Richtlinien bilden, gemeinsam mit dem SAP-weit gültigen Abschlusskalender, die Grundlage für den Abschlusserstellungsprozess, in dem alle Konzerngesellschaften ihre lokalen Abschlüsse für die Abteilung Corporate Financial Reporting zur Erstellung des Konzernabschlusses vorbereiten. Unsere Tochtergesellschaften sind für die Einhaltung der konzernweit gültigen Rechnungslegungsvorschriften in ihren Abschlüssen zuständig und werden hierbei von Corporate Financial Reporting unterstützt und überwacht. Die interne Revision und Corporate Financial Reporting nehmen Prüfungen der Rechnungslegung der SAP-Gesellschaften vor. Die Konsolidierung wird global durch Corporate Financial Reporting durchgeführt. Darüber hinaus setzt SAP externe Dienstleister ein, zum Beispiel für die Bewertung von Pensionsverpflichtungen, aktienorientierten Vergütungen und durch Unternehmenserwerbe zugegangenen Vermögenswerten. Die mit der Finanzberichterstattung betrauten Mitarbeiter werden für unsere internen Richtlinien und Prozesse geschult. Das IKRMS sieht sowohl präventive als auch nachträglich aufdeckende Kontrollen vor. Hierzu gehören IT-gestützte und manuelle Abstimmungen, die Einrichtung von Funktionstrennungen (Vier-Augen-Prinzip),

Zugriffsregelungen im SAP-System sowie Überwachung. Ergänzend hierzu führt GRC Analysen durch, wie zum Beispiel regelmäßige Durchsichten der Prozessdokumentation und Effektivitätsprüfungen, die die Wirksamkeit des Kontrollsystems für die Finanzberichterstattung erhöhen.

Die Effektivität des IKRMS der SAP wird durch GRC geprüft. Auf Grundlage der Ergebnisse beurteilt das Management der SAP die Funktionsfähigkeit des IKRMS der SAP zum 31. Dezember des jeweiligen Geschäftsjahres. Ein Ausschuss unter Vorsitz des Finanzvorstands der SAP AG trifft sich in regelmäßigen Abständen, um den Prüfungsumfang der IKRMS-Effektivitätsprüfung zu bestimmen, mögliche Kontrollschwächen zu diskutieren und Maßnahmen abzuleiten. Zudem diskutiert der Prüfungsausschuss des Aufsichtsrats in seinen Sitzungen regelmäßig die Beurteilungen des Managements hinsichtlich der Funktionsfähigkeit des IKRMS bezogen auf den IFRS-Konzernabschluss.

Die Einschätzung der Effektivität unseres internen Kontrollsystems für die Finanzberichterstattung ergab, dass SAP basierend auf den Kriterien des von COSO herausgegebenen Internal Control – Integrated Framework zum 31. Dezember 2010 über ein wirksames internes Kontrollsystem für die Finanzberichterstattung verfügte.

Das interne Kontrollsystem für die Finanzberichterstattung eines Unternehmens dient dazu, eine hinreichende Sicherheit bezüglich der Zuverlässigkeit der Finanzberichterstattung sowie der Erstellung von Abschlüssen zu externen Zwecken im Einklang mit allgemein anerkannten Rechnungslegungsgrundsätzen zu gewährleisten. Aufgrund der ihm innewohnenden Grenzen kann das interne Kontrollsystem für die Finanzberichterstattung Falschaussagen gegebenenfalls nicht verhindern oder aufdecken.

### **Risikofaktoren**

Die durch das Risikomanagement-System ermittelten und verfolgten signifikanten Unternehmensrisiken führen wir im Folgenden auf. Sie sind nach den gleichen Risikokategorien aufgegliedert, die wir in unserem internen Risikomanagement-Berichtssystem verwenden.

Die SAP AG übt die Holdingfunktion für den SAP-Konzern aus und unterliegt daher ebenfalls – direkt oder indirekt – den nachfolgend beschriebenen Chancen und Risiken.

---

## **Ökonomische, politische und regulatorische Risiken**

**Die Unsicherheit in der globalen Wirtschaft und in den politischen Rahmenbedingungen hat sich negativ auf unsere Geschäftstätigkeit, unsere Finanz- und Ertragslage und unseren Cashflow ausgewirkt und könnte dies auch in Zukunft tun.**

Die Investitionsbereitschaft unserer Kunden beim Kauf und bei der Implementierung von SAP-Produkten hängt grundsätzlich von den wirtschaftlichen Rahmenbedingungen und anderen geschäftlichen Faktoren ab. In den Regionen, in denen wir agieren, und in den Branchen, in denen unsere Kunden tätig sind, könnten sich anhaltende Unsicherheiten der wirtschaftlichen Bedingungen weiterhin negativ auswirken. Zu diesen Auswirkungen gehören unter anderem:

- Rückgang der IT-Investitionen im Allgemeinen,
- Rückgang der Kundennachfrage nach unserer Software und unseren Dienstleistungen, einschließlich Auftragsverzögerungen und -stornierungen sowie verringerter Auftragsvolumina,
- fehlende Finanzierung durch Banken und andere Kreditgeber für den Erwerb unserer Software und Dienstleistungen, da Kunden entweder keine Kredite erhalten oder nicht zu akzeptablen Bedingungen,
- vermehrtes Auftreten von Zahlungsverzug oder Insolvenz bei Kunden, Partnern und wichtigen Lieferanten,
- höheres Ausfallrisiko von Forderungen und infolgedessen möglicherweise erhebliche Abschreibungen in der Zukunft,
- größerer Preisdruck bei unseren Produkten und Dienstleistungen und
- Druck auf unsere operative Marge.

Sollte sich die Wirtschaftslage verschlechtern, erwarten wir anhaltende negative Auswirkungen auf unser Umsatzwachstum, Zahlungsausfälle und dadurch negative Auswirkungen auf unser Ergebnis. Darüber hinaus könnte eine anhaltende oder weitere Verschlechterung der Wirtschaftslage die anderen in diesem Bericht beschriebenen Risiken erhöhen.

Diesen Risiken begegnen wir mit einer Reihe von Maßnahmen. Wir verfolgen auch künftig den eingeschlagenen Weg der Kostendisziplin und einer konservativen Finanzplanung. Wir passen außerdem unsere Organisation und unsere Prozesse kontinuierlich an, um eine höhere Effizienz und Effektivität zu erzielen. Auch 2010 sind unser Gesamtumsatz und unser

Betriebsergebnis im Jahresvergleich erneut gestiegen. Wir können jedoch die Möglichkeit nicht ausschließen, dass sich die wirtschaftlichen Rahmenbedingungen oder andere geschäftliche Faktoren negativ auf unsere Geschäftstätigkeit, unsere Finanz- und Ertragslage oder unseren Cashflow auswirken.

**Aufgrund unserer internationalen Geschäftstätigkeit unterliegen wir unterschiedlichen gesetzlichen Anforderungen in verschiedenen Ländern und sind ökonomischen und anderen Risiken ausgesetzt, die unserer Geschäftstätigkeit, unserer Finanz- und Ertragslage oder unserem Cashflow schaden könnten.**

Unsere Produkte und Dienstleistungen vermarkten wir gegenwärtig weltweit in mehr als 120 Ländern in den Regionen Asien-Pazifik-Japan (APJ), Europa, Naher Osten und Afrika (EMEA) sowie Nord- und Südamerika (Amerika). Die Geschäftstätigkeit in diesen Ländern ist mit den für internationale Geschäfte üblichen Risiken verbunden. Dazu zählen insbesondere:

- der regionale und lokale Konjunkturrückgang, Konjunkturschwankungen und die daraus resultierende Unsicherheit im Markt,
- die allgemeine wirtschaftliche oder politische Lage der einzelnen Länder und Regionen,
- das Aufeinandertreffen unterschiedlicher Steuersysteme,
- mögliche steuerliche Hindernisse, die den Geschäftsverkehr in bestimmten Ländern erschweren,
- die Führung des Unternehmens unter Berücksichtigung mehrerer Rechtssysteme,
- Wechselkursschwankungen,
- längere Zahlungszyklen,
- gesetzliche Hürden wie Ein- und Ausfuhrbeschränkungen; Wettbewerbsordnungen; Rechtsvorschriften für die Nutzung des Internets; spezielle Richtlinien für die Entwicklung, Zertifizierung oder Bereitstellung von Software und Dienstleistungen; Handelsbeschränkungen; schwankende Zoll- und Frachtsätze sowie Reise- und Kommunikationskosten,
- Aufwendungen für die Anpassung unserer Produkte an lokale Gegebenheiten und die Geschäftstätigkeit in lokalen Währungen,
- unterschiedliche Anforderungen von Betriebsräten und Gewerkschaften in den verschiedenen Ländern und
- die höheren Kosten der internationalen Geschäftstätigkeit.

---

Mit unserer weiteren Expansion in neue Regionen und Märkte könnten sich diese Risiken erhöhen. Einzelne oder mehrere dieser Faktoren könnten sich negativ auf unsere Geschäftstätigkeit weltweit oder in einzelnen oder mehreren Ländern und Regionen auswirken. Infolgedessen könnten unser guter Ruf, unsere Geschäftstätigkeit, unsere Finanz- und Ertragslage sowie unser Cashflow beeinträchtigt werden.

Wir wirken diesen Risiken durch eine Reihe von Maßnahmen entgegen, die wir von den jeweiligen Umständen abhängig machen. Diese können von der Anpassung unserer Organisation an die lokalen Gegebenheiten über die Beratung durch Wirtschaftsexperten, Anwaltskanzleien, Steuerberater und Behörden der Gastländer bis hin zur Einleitung gerichtlicher Verfahren reichen.

**Soziale und politische Instabilität, beispielsweise verursacht durch Terroranschläge, Krieg oder internationale Konflikte, Pandemien und Naturkatastrophen, könnte unsere Geschäftstätigkeit beeinträchtigen.**

Terroranschläge und andere Gewaltakte oder Kriegshandlungen, Pandemien oder Naturkatastrophen können sich negativ auf die weltweite Wirtschaft auswirken. Die daraus resultierende soziale und politische Instabilität könnte weiter zur aktuellen globalen Konjunkturertrübung und zur wirtschaftlichen und politischen Unsicherheit in vielen Regionen, in denen wir tätig sind, beitragen. Dies könnte sich sowohl bei uns als auch bei unseren Kunden negativ auf die Umsätze und die Investitionsbereitschaft auswirken. Unser Hauptsitz mit wesentlichen Forschungs- und Entwicklungsabteilungen sowie weiteren zentralen Unternehmensfunktionen befindet sich im deutschen Bundesland Baden-Württemberg. Eine Katastrophe, die den Norden Baden-Württembergs betrifft, könnte äußerst schwerwiegende Folgen für unsere Geschäftstätigkeit haben. Ähnliche Katastrophen an anderen Standorten, speziell Buenos Aires (Argentinien), São Paulo (Brasilien), Schanghai (China), Paris (Frankreich), Bangalore (Indien), Dublin (Irland), Ra'anana (Israel), Tokio (Japan), Vancouver (Kanada), Mexiko-Stadt (Mexiko), Singapur, Prag (Tschechische Republik), London (UK), oder an unseren US-amerikanischen Standorten New York, Dublin, Palo Alto und Newtown Square könnten unsere weltweite Geschäftstätigkeit ebenfalls beeinträchtigen. Eine Katastrophe, in deren Folge wir einen bedeutenden Anteil unserer Mitarbeiter verlieren würden oder die Geschäftstätigkeit an unserem Hauptsitz oder anderen wichtigen Stand-

orten beenden oder unterbrechen müssten, könnte uns daran hindern, unsere regulären Dienstleistungen zu erbringen und den erwarteten Ertrag zu erwirtschaften.

Das Gebiet unseres Hauptsitzes wird im Allgemeinen nicht von Naturkatastrophen heimgesucht. Durch eine redundante Datenhaltung und tägliche Datensicherung weltweit ist zudem gewährleistet, dass unsere zentrale IT-Infrastruktur und die kritischen Unternehmenssysteme durch Naturkatastrophen nicht wesentlich beeinträchtigt werden. Um mögliche Schäden zu minimieren und eine abgestimmte, effektive Reaktion der Unternehmensleitung zu ermöglichen, hat die SAP an allen oben genannten Standorten bereits lokale Krisenteams eingerichtet sowie Pläne zur Aufrechterhaltung der Funktionsfähigkeit kritischer Geschäftsprozesse (Business-Continuity-Pläne) erarbeitet. Regionale Krisenteams für die Regionen Amerika, APJ und EMEA sowie ein globales Krisenteam koordinieren die je nach Ausmaß einer Krise erforderlichen Aktivitäten. Durch die Einrichtung weiterer lokaler Krisenteams auch an kleineren Standorten sowie die ergänzende Entwicklung von Business-Continuity-Plänen für globale Geschäftsbereiche entsteht ein weltweites Business-Continuity-Management-System. Einen wichtigen Beitrag zur Realisierung dieses Business-Continuity-Management-Systems stellten die erfolgreiche Zertifizierung der IT-Abteilung der SAP nach dem internationalen Standard BS 25999 (Business Continuity Management) im August 2009 sowie ein erfolgreiches Überprüfungsaudit durch den TÜV Nord im Jahr 2010 dar. Obwohl die beschriebenen Risiken eintreten können, glauben wir, dass in Anbetracht dieser Maßnahmen und der Organisation der SAP das Risiko nachhaltiger Auswirkungen auf die Vermögens-, Finanz- und Ertragslage der SAP gering ist.

### **Marktrisiken**

**Sollten sich Bestandskunden entscheiden, keine zusätzlichen Softwareprodukte zu lizenzieren, ihre Wartungsverträge nicht zu verlängern oder keine weiteren Beratungs- oder Schulungsleistungen zu erwerben, könnte sich dies negativ auf unsere Geschäftstätigkeit, unsere Finanz- und Ertragslage oder unseren Cashflow auswirken.**

Aus unserer großen Bestandskundenbasis haben wir in der Vergangenheit stets zusätzliche neue Software-, Wartungs-, Beratungs- und Schulungserlöse generiert. Auch 2010 haben wir ein umfangreiches Spektrum an Supportdienstleis-

---

tungen angeboten. Sowohl der Erfolg unseres Supportportfolios als auch unsere eigene Fähigkeit, Serviceleistungen in hoher Qualität zu liefern, sind wesentlich für die Erreichung unserer Unternehmensziele. Wenn Bestandskunden ihre Wartungsverträge kündigen oder nicht verlängern, wenn sie alternative Angebote anderer Anbieter nutzen oder wenn sie keine weiteren Produkte und Dienstleistungen von uns erwerben, wirkt sich dies negativ auf unsere Geschäftstätigkeit, unsere Finanz- und Ertragslage oder unseren Cashflow aus.

Wir überwachen sowohl die Leistungsfähigkeit unserer Supportorganisation durch Kontrolle der Einhaltung zugesagter Serviceleistungen als auch die Zufriedenheit unserer Kunden kontinuierlich, wobei wir eng mit SAP-Anwendervereinigungen zusammenarbeiten, um bei Bedarf Maßnahmen zur Minderung dieses Risikos einzuleiten.

**Angesichts des scharfen Wettbewerbs und der Konsolidierung in der Softwarebranche könnten unser Marktanteil und unser Finanzergebnis schrumpfen.**

Die Softwarebranche ist weiterhin von einer rasanten Entwicklung gekennzeichnet, die sowohl durch die Konsolidierung als auch durch technische Innovationen bedingt ist. Daher ist der Markt für unsere Produkte und Services auch weiterhin stark umkämpft. Wir haben über die vergangenen zehn Jahre unser traditionelles auf ERP-Produkte ausgerichtetes Geschäft um neue Produkte und Dienstleistungen erweitert, beispielsweise On-Demand-Software oder Software für Mobilgeräte. Dadurch stehen wir neuen Wettbewerbern mit den unterschiedlichsten Unternehmensgrößen, Standorten und Fachgebieten gegenüber. Übernahmen sowie die zunehmende Nutzung neuer Entwicklungsmodelle, wie die serviceorientierte Architektur (SOA), oder neuer Bereitstellungs- und Lizenzmodelle, insbesondere Software as a Service (SaaS), Business Process Outsourcing (BPO) und Cloud Computing, könnten es unseren Mitbewerbern ermöglichen, ebenfalls integrierte Paketslösungen in Konkurrenz zu SAP anzubieten. So haben beispielsweise IBM, Microsoft und Oracle Unternehmen akquiriert, um ihr Lösungsportfolio oder ihren Marktanteil zu erweitern, und erhöhen damit den Wettbewerbsdruck auf die SAP. Auch SaaS-Anbieter wie Salesforce.com, die einem wachsenden SaaS-Ökosystem für Einzellösungen angehören, machen der SAP Marktanteile streitig. Durch Cloud Computing werden web-basierte Geschäftsmodelle schnell zur Realität. Dies ermöglicht es jedem Unternehmen, komplette Wertschöpfungsketten

zu koordinieren oder selbst zu betreiben und somit unsere wichtigsten Wachstumsmärkte zu beeinflussen. Insbesondere Anbieter von mobilen Endgeräten oder Plattformen für mobile Anwendungen könnten mit offensiven Strategien das Marktpotenzial der SAP im Bereich mobiler Applikationen einschränken und SAP von möglichen Umsatzquellen abschneiden. Aktuelle und potenzielle Wettbewerber arbeiten derzeit untereinander oder mit Drittanbietern zusammen oder könnten solche Kooperationsbeziehungen in Zukunft weiter aufbauen, um die Anforderungen der Kunden noch gezielter zu bedienen. Der hierdurch verstärkte Wettbewerb könnte sich in einem erhöhten Preisdruck, Kostensteigerungen oder dem Verlust von Marktanteilen niederschlagen.

Wir sind jedoch davon überzeugt, dass unsere Strategie des organischen Wachstums, ergänzt durch gezielte Übernahmen, und die Einführung des SaaS-Modells weiterhin den richtigen Ansatz für dieses Umfeld darstellen und dass wir auf diese Weise unsere Führungsposition in den Schlüsselmärkten schützen können.

**Risiken der Geschäftsstrategie**

**Die Nachfrage nach unseren neuen Produkten könnte sich nicht wie geplant entwickeln und unsere Strategie für neue Märkte sowie für neue Geschäfts- und Nutzungsmodelle könnte nicht erfolgreich sein.**

Aufgrund der aktuellen Wirtschaftslage unterliegen die Nachfrage nach unseren neu eingeführten Produkten und Dienstleistungen und deren Akzeptanz durch unsere Kunden einem hohen Maß an Unsicherheit. Schwerpunkte unserer Strategie bilden die kontinuierliche Innovation bei einem stabilen Kernprodukt und die Entwicklung von Geschäftsanwendungen für fest installierte Systeme (On Premise), für die bedarfsgerechte Nutzung über das Internet (On Demand) oder für mobile Endgeräte (On Device). In diesem Zusammenhang sind die Einführung eines neuen Geschäftsmodells, die Erweiterung unseres Partnernetzwerks sowie die Schaffung einer Infrastruktur für das Massengeschäft von höchster Wichtigkeit. Trotz unserer Bemühungen könnte sich die Nachfrage nach diesen Produkten und Dienstleistungen nicht wie geplant entwickeln, was unsere Geschäftstätigkeit, unsere Finanz- und Ertragslage oder unseren Cashflow erheblich negativ beeinflussen könnte. Darüber hinaus ist die Erschließung neuer

---

Marktsegmente mit Risiken behaftet, die sich aus der Entwicklung und Markteinführung neuer Produkte ergeben. Weitere Informationen finden Sie im Abschnitt Produktrisiken.

Wir führen unsere Strategie der gezielten, kontrollierten Produktauslieferung fort, um die Anforderungen unserer Kunden in Bezug auf eine schnellere Wertschöpfung durch unsere Produkte, ein minimales Risiko und vorhersagbare Kosten für Kunden und SAP zu erfüllen. Deshalb schätzen wir das Risiko einer signifikanten Beeinträchtigung der geplanten Ergebnisentwicklung durch die geplanten Innovationen und neuen Geschäfts- und Nutzungsmodelle als gering ein.

**Wenn wir es versäumen, Partnerschaften mit Vertriebspartnern, Softwarezulieferern, Systemintegratoren, Systemhäusern und unabhängigen Softwareherstellern, die uns beim Vertrieb unserer Produkte und Dienstleistungen unterstützen, einzugehen, zu verlängern oder auszubauen, könnte dies unsere Geschäftstätigkeit, unsere Finanz- und Ertragslage oder unseren Cashflow beeinträchtigen.**

Wir haben Kooperationsabkommen mit Vertriebspartnern und führenden Anbietern von Computersoftware und -hardware abgeschlossen. Die meisten dieser Vereinbarungen sind relativ kurz befristet und nicht exklusiv. Diese Partner unterhalten ähnliche Vereinbarungen mit unseren Konkurrenten und zählen teilweise auch selbst zu unseren Konkurrenten. Darüber hinaus haben wir ein Netzwerk an unabhängigen Softwareanbietern (Independent Software Vendors, ISVs) aufgebaut, die eigene Geschäftsanwendungen für die Plattform SAP NetWeaver entwickeln. Diese Partnerschaften sind mit zahlreichen Risiken behaftet, unter anderem:

- Die Partner erneuern ihre Verträge mit uns entweder gar nicht oder nicht zu Bedingungen, die für uns akzeptabel sind.
- Die Partner liefern keine qualitativ hochwertigen Produkte und Dienstleistungen.
- Die Partner stellen keine ausreichenden Ressourcen für die Vermarktung, den Vertrieb und Support sowie die Integration ihrer Produkte in unser Portfolio bereit.

Bei Eintreten eines oder mehrerer dieser Risiken könnten die Vermarktung von und die Nachfrage nach SAP-Software und -Dienstleistungen beeinträchtigt werden und wir wären möglicherweise nicht in der Lage, erfolgreich mit anderen Softwareanbietern zu konkurrieren. Dies könnte unserem

guten Ruf schaden und sich negativ auf unsere Geschäftstätigkeit, unsere Finanz- und Ertragslage oder unseren Cashflow auswirken.

Das Risiko, dass unsere erwartete Ergebnisentwicklung signifikant beeinflusst wird, halten wir für gering, da Kooperationsvereinbarungen sowohl für die großen Systemintegrationshäuser als auch für IT-Infrastrukturunternehmen wie IBM oder Microsoft auch bei bestehender Konkurrenzsituation eine effiziente und attraktive Möglichkeit zur Steigerung ihres eigenen Geschäftserfolgs im Unternehmenssektor bieten. Dies gilt aus unserer Sicht auch für die bestehende Vereinbarung mit Oracle hinsichtlich des Vertriebs von Oracle-Datenbanklizenzen durch uns, da wir für Oracle der weltweit wichtigste Datenbank-Weiterverkäufer sind. Außerdem haben wir einen ausführlichen Zertifizierungsprozess für alle von Drittanbietern bereitgestellten Lösungen eingerichtet, die auf der SAP-Preisliste aufgeführt sind. Dieser soll eine gleichbleibend hohe Qualität dieser Lösungen sichern.

### **Personalrisiken**

**Wenn wir unsere Personalressourcen an unseren internationalen Standorten nicht effektiv steuern, könnte dies die Effizienz unseres Geschäftsbetriebs beeinträchtigen und sich negativ auf unsere Ertragslage auswirken.**

Es ist entscheidend für unseren Erfolg, dass wir unsere Personalplanung und unsere Standortstrategie mit unserer Gesamtstrategie abstimmen. Veränderungen des Personalbestands und der Infrastruktur könnten zu einem Ungleichgewicht zwischen Kosten und Umsatz führen. Darüber hinaus ist es von zentraler Bedeutung, dass wir die personellen Ressourcen an unseren internationalen Standorten effektiv steuern, da ansonsten die Effizienz unseres Geschäftsbetriebs beeinträchtigt werden könnte. Dies könnte sich wiederum negativ auf unsere Finanz- und Ertragslage oder unseren Cashflow auswirken.

Diesem Risiko wirkt die SAP gezielt durch eine Reihe von Maßnahmen entgegen. Dazu gehören die Nachfolgeplanung, die strategische Personalplanung, die Stärkung unseres Ansehens als Arbeitgeber, die Karriereplanung (Qualifizierungsangebote und Weiterbildungsmaßnahmen) sowie Arbeitgeberzu-



---

satzleistungen. Diese umfassen ein leistungsbezogenes Vergütungssystem, langfristig angelegte Anreizprogramme sowie in einigen Ländern eine arbeitgeberfinanzierte Altersversorgung.

**Wenn es uns nicht gelingt, Führungskräfte und Mitarbeiter mit speziellem Fach- und Technologiewissen zu gewinnen und ans Unternehmen zu binden, sind wir möglicherweise nicht mehr in der Lage, unserer Geschäftstätigkeit effektiv nachzugehen und erfolgreiche neue Produkte und Dienstleistungen zu entwickeln.**

Unsere hoch qualifizierten Mitarbeiter und Führungskräfte bilden die Grundlage für unseren nachhaltigen wirtschaftlichen Erfolg. Der Wettbewerb in unserer Branche um kompetente und spezialisierte Fach- und Führungskräfte ist jedoch intensiv. Wenn wir es nicht schaffen, gut ausgebildete Mitarbeiter zu gewinnen oder wenn solche Mitarbeiter das Unternehmen verlassen und kein adäquater Ersatz verfügbar ist, wären wir nicht mehr in der Lage, unserer Geschäftstätigkeit effektiv nachzugehen und erfolgreiche neue Produkte und Dienstleistungen zu entwickeln. Dies betrifft insbesondere neue, innovative Technologien, die wir künftig auf den Markt bringen wollen. Zudem könnten wir uns durch die Einstellung von Mitarbeitern den Ansprüchen anderer Unternehmen aussetzen, die ihre Mitarbeiter daran hindern möchten, für einen Wettbewerber zu arbeiten.

Trotz dieser Risiken sehen wir uns aufgrund unserer führenden Marktposition auch künftig in der Lage, hervorragend qualifizierte Spitzenkräfte mit Potenzial zur Steigerung des Geschäftserfolgs der SAP einstellen zu können. Hinzu kommt die gezielte Förderung aller Mitarbeiter und Führungskräfte durch verschiedene Maßnahmen zur Aus- und Weiterbildung, Mentoren- und Coachingprogramme sowie besondere Angebote für unsere Spitzenkräfte. Wir setzen einen starken Schwerpunkt auf die Nachfolgeplanung für Führungs- und Schlüsselpositionen, um dadurch den Geschäftsbetrieb der SAP vor Beeinträchtigungen durch Mitarbeiterfluktuation zu schützen. Daher schätzen wir das Risiko einer spürbaren Beeinträchtigung unseres Geschäftsbetriebs aufgrund unserer mangelnden Fähigkeit, qualifizierte Mitarbeiter zu gewinnen, oder aufgrund des Verlusts von Führungskräften und Mitarbeitern derzeit als gering ein.

## **Organisations- und Governance-Risiken**

**Die Rechtsvorschriften und gesetzlichen Anforderungen zur Unternehmensführung in Deutschland, den USA und an anderen Standorten haben sich in den letzten Jahren signifikant verschärft.**

Als in Deutschland ansässige Aktiengesellschaft, deren Wertpapiere an einer US-amerikanischen Börse notiert sind, unterliegt die SAP den deutschen und US-amerikanischen Rechtsvorschriften zur Unternehmensführung sowie den Anforderungen weiterer Rechtssysteme. Das regulatorische Umfeld hat sich in den letzten Jahren signifikant verschärft, insbesondere durch die Einführung des US-amerikanischen Sarbanes-Oxley Act (und des Dodd-Frank Act) sowie die striktere Anwendung des Foreign Corrupt Practices Act (Antikorrupptionsgesetz) in den USA. Hinzu kommt eine immer höhere Regulierungsdichte in Deutschland. Angesichts der hohen Komplexität dieser Gesetze kann es keine Gewähr dafür geben, dass es nicht zu Mängeln bei der Einhaltung bestimmter Vorschriften kommt, zum Beispiel durch betrügerisches oder nachlässiges Verhalten einzelner Mitarbeiter oder durch mangelnde Einhaltung formaler Dokumentationsanforderungen. Jede gegen uns vorgebrachte Beschuldigung eines Gesetzesverstößes, ob gerechtfertigt oder nicht, könnte sich in erheblichem Maße negativ auf unser Ansehen und damit auf den Börsenkurs unserer Stammaktien und American Depositary Receipts (ADRs) auswirken.

Eine exakte Bewertung des Risikos ist aufgrund der Vielzahl an möglichen Verstößen mit unterschiedlichem Ausmaß schwierig. Wir halten uns stets über neue gesetzliche Anforderungen auf dem Laufenden und sorgen dafür, dass unsere Mitarbeiter die vorgeschriebenen Standards und unseren Verhaltenskodex (Code of Business Conduct) kennen. Ein zentrales Global Compliance Office steuert alle unsere Maßnahmen, die sich auf die Einhaltung von Richtlinien (Compliance) beziehen. Der Chief Global Compliance Officer koordiniert unternehmensweit die Einführung unserer Richtlinien sowie entsprechende Weiterbildungs- und Umsetzungsmaßnahmen. Die Umsetzungsmaßnahmen werden überwacht und dokumentiert, um Trends zu ermitteln, Risiken zu analysieren und eine einheitliche Anwendung der Richtlinien im gesamten Konzern zu gewährleisten.

---

Die Umsetzung der SAP-Nachhaltigkeitsstrategie könnte sich als schwierig erweisen und jedes Versäumnis unsererseits, den Ansprüchen von Kunden oder Partnern oder allgemein anerkannten Nachhaltigkeitsstandards zu entsprechen, könnte unsere Ertrags- und Geschäftslage beeinträchtigen und unserem Ansehen schaden.

Wir verstehen unter Nachhaltigkeit die ganzheitliche Betrachtung von Geschäftschancen unter gesellschaftlichen, ökologischen und ökonomischen Gesichtspunkten. Daher berücksichtigen wir auch Nachhaltigkeitsrisiken speziell in den folgenden Bereichen:

- Klimawandel und andere ökologische Herausforderungen wie Energie- und Wasserverbrauch oder Abfallreduzierung,
- Unternehmensintegrität,
- Personalwirtschaft, einschließlich der Aspekte Gesundheit, Sicherheit, Vielfalt und Mitarbeiterzufriedenheit,
- ethisches Verhalten von Lieferanten,
- Kundenzufriedenheit,
- Barrierefreiheit und Sicherheit unserer Produkte sowie
- Privatsphäre und Datenschutz bei der Anwendung von SAP-Produkten.

Wenn unsere Nachhaltigkeitsstrategie den Ansprüchen unserer Kunden und Partner oder allgemein anerkannten Nachhaltigkeitsstandards nicht ausreichend entspricht, könnte dies unserem Ansehen schaden und unsere Geschäfts-, Ertrags- und Finanzlage oder unseren Cashflow beeinträchtigen. Unsere Nachhaltigkeitsstrategie ist im Einzelnen in unserem Nachhaltigkeitsbericht 2010 dargelegt ([www.sapsustainabilityreport.com](http://www.sapsustainabilityreport.com)).

Wir wirken Risiken in diesem Zusammenhang durch angemessene Maßnahmen entgegen, um negative Auswirkungen für unsere Kunden, Mitarbeiter und Investoren zu vermeiden, die von der SAP eine solide Nachhaltigkeitsstrategie erwarten. Weitere Maßnahmen zur Risikominimierung sind unsere Strategie zur Reduktion der Treibhausgase und die vierteljährliche Überprüfung unserer Nachhaltigkeitskennzahlen. Daher schätzen wir dieses Risiko als gering ein.

### **Kommunikations- und Informationsrisiken**

Wir können unter Umständen nicht verhindern, dass Einzelheiten zu unseren künftigen Strategien, Technologien und Produkten oder Informationen, die dem Datenschutz unterliegen, unerlaubt an die Öffentlichkeit gelangen und wir dadurch einen Schaden erleiden.

Wir haben in den vergangenen Jahren eine Reihe von Maßnahmen ergriffen, um dem Risiko entgegenzuwirken, dass interne, vertrauliche Mitteilungen und Informationen zu sensiblen Themen, beispielsweise über unsere künftigen Strategien, Technologien und Produkte, oder Informationen, die dem Datenschutz unterliegen, unzulässig oder vorzeitig an die Öffentlichkeit gelangen. Dennoch gibt es keine Garantien dafür, dass diese Schutzmechanismen in jedem Fall greifen. So könnte unsere Marktposition beispielsweise ernsthaft geschädigt werden, wenn vertrauliche Informationen über die künftige Ausrichtung der Produktentwicklung an die Öffentlichkeit gelangen, wodurch unsere künftigen Umsätze geschmälert werden könnten. Jede derart verfrühte Bekanntgabe von Informationen könnte sich negativ auf unsere Geschäftstätigkeit, unsere Vermögens- und Ertragslage oder unseren Cashflow auswirken.

Zu den oben genannten Maßnahmen zählen unter anderem unternehmensweit verbindliche Sicherheitsstandards und Richtlinien zur internen und externen Kommunikation, datentechnische Vorkehrungen zur Unterbindung der Weiterleitung vertraulicher interner Inhalte über externe Kommunikationsnetzwerke sowie die Ausgabe besonders verschlüsselter Hardware an Mitarbeiter mit regelmäßigem Umgang mit vertraulichen Informationen. Trotz der weitreichenden Maßnahmen, die wir regelmäßig überprüfen, können wir nicht ausschließen, dass eine negative Auswirkung auf die Vermögens-, Finanz- und Ertragslage eintreten könnte.

### **Finanzrisiken**

**Die Zusammensetzung unserer Umsatzerlöse kann schwanken und sich nachteilig auf unsere Gewinnspannen auswirken.**

Schwankungen und Rückgänge in unserem Lizenzgeschäft können sich auf unsere derzeitigen und zukünftigen Wartungs- und Serviceerlöse auswirken, die in der Regel auf Softwareer-

---

löse folgen und von diesen abhängen. Ein Absinken des prozentualen Anteils der Softwareerlöse am Gesamterlös kann sich signifikant negativ auf unsere Geschäftstätigkeit, unsere Finanz- und Ertragslage oder unseren Cashflow auswirken. Wir haben neue Lizenzierungs- und Nutzungsmodelle wie On Demand und Subskriptionen eingeführt, bei denen die Umsätze gewöhnlich über einen längeren Zeitraum realisiert werden. Ein wesentlicher Teil der entsprechenden Kosten für Entwicklung, Marketing und Bereitstellung unserer Lösungen im Rahmen dieser neuen Modelle könnte vor der Umsatzrealisierung entstehen und sich kurzfristig auf unsere Gewinnspanne auswirken.

**Unsere künftige Liquidität sowie das Ausfallrisiko und die Bewertung unserer Finanzanlagen und Forderungen können durch eine negative Entwicklung der weltweiten Konjunktur beeinflusst werden.**

Ein konjunktureller Abschwung könnte unsere zukünftige Liquidität negativ beeinflussen. Wir verfügen über ein zentrales Finanzmanagement für die globale Liquiditätssteuerung sowie für das Zins- und Währungsmanagement. Wichtigstes Ziel ist es, eine Konzernmindestliquidität sicherzustellen, um unsere Zahlungsfähigkeit stets zu gewährleisten. Zum 31. Dezember 2010 belief sich unsere Bruttoliquidität auf 3,5 Mrd. €. Darüber hinaus verfügen wir über einen soliden operativen Cashflow, der größtenteils aus periodisch wiederkehrenden Einnahmen besteht, sowie über Kreditlinien, die wir im Bedarfsfall nutzen können.

Unsere Konzernliquidität könnte durch eine negative Entwicklung der weltweiten Konjunktur einem höheren Ausfallrisiko unterliegen. Dies könnte die Bewertung unserer Finanzanlagen negativ beeinflussen. Die Anlagepolitik der SAP hinsichtlich der Konzernliquidität basiert auf einheitlichen Regeln, die in einer weltweit für alle Konzerngesellschaften geltenden Treasury-Richtlinie zusammengefasst sind. Gemäß dieser Richtlinie investieren wir nur in Finanzanlagen von Emittenten oder Fonds mit einem Mindestrating von „A-“. Das gewichtete durchschnittliche Rating unserer Konzernliquidität liegt zwischen „AA-“ und „A+“. Wir verfolgen eine vorsichtige Anlagepolitik, die durch

eine breite Streuung der Anlagen auf unterschiedliche Kontrahenten, Anlagen mit überwiegend kurzfristiger Laufzeit und Standardanlageinstrumente gekennzeichnet ist.

Unsere Forderungen könnten durch eine negative Entwicklung der weltweiten Konjunktur einem höheren Ausfallrisiko unterliegen. Dies könnte die Bewertung unserer Forderungen negativ beeinflussen. Das Forderungsmanagement der SAP basiert auf einheitlichen Regeln, die in den weltweit für alle Konzerngesellschaften geltenden Richtlinien für Kreditmanagement und Rechnungslegung festgelegt sind.

Wir können nicht garantieren, dass die festgelegten Maßnahmen erfolgreich sind und sich Unsicherheiten in der globalen Wirtschaft nicht negativ auf unsere Geschäftstätigkeit, unsere Finanz- und Ertragslage oder unseren Cashflow auswirken.

**Die Verwendung von Schätzungen durch das Management kann sich auf unsere Ertrags- und Vermögenslage auswirken.**

Nach den Rechnungslegungsnormen gemäß IFRS beziehungsweise HGB erfordert unsere Bilanzierung in großem Umfang Annahmen, Schätzungen und Beurteilungen durch das Management. Die Sachverhalte, auf denen die Schätzungen und Beurteilungen des Managements beruhen, sowie die Beurteilung dieser Sachverhalte können sich im Laufe der Zeit ändern, zu erheblichen Schätzungsänderungen führen und sich ungünstig auf unsere Ertrags- und Vermögenslage auswirken. Weitere Informationen finden sich unter Textziffer (3c) im Anhang zum Konzernabschluss.

Wir wirken diesem Risiko durch eine Reihe von Maßnahmen entgegen: Zum Beispiel schulen wir das Management und die in der Bilanzierung beschäftigten Mitarbeiter entsprechend und wenden bei Schätzungen das Vier-Augen-Prinzip an.

**Aktuelle und zukünftige Verlautbarungen zu Bilanzierungsmethoden und andere Rechnungslegungsstandards, vor allem zur Umsatzrealisierung, können sich negativ auf unsere veröffentlichten Finanzinformationen auswirken.**

Wir überprüfen regelmäßig die Einhaltung aller für uns geltenden Rechnungslegungsvorschriften und aller neuen Verlautbarungen, die für uns relevant sind. Das Ergebnis unserer Prüfungen oder neue Rechnungslegungsvorschriften könnten

---

dazu führen, dass wir unsere konzerninternen Bilanzierungsmethoden, vor allem im Hinblick auf die Umsatzrealisierung, sowie unsere Geschäftspraktiken an neue oder geänderte Rechnungslegungsstandards anpassen oder bereits veröffentlichte Rechnungslegungsinformationen korrigieren müssen. Eine wesentliche Auswirkung auf unsere Vermögenslage, unsere Ertragslage oder unseren Cashflow kann daher nicht ausgeschlossen werden. Unsere wesentlichen Rechnungslegungsgrundsätze sind unter Textziffer (3) im Anhang zum Konzernabschluss beschrieben.

**Da wir weltweit Geschäfte tätigen, können unsere Vermögens- und Ertragslage oder unser Cashflow durch Währungs- und Zinsschwankungen beeinflusst werden.**

Unsere Bilanz- und Konzernwährung ist der Euro. Ein beträchtlicher Teil der Geschäfte wird jedoch in anderen Währungen abgewickelt. Rund 67 % unseres Konzernumsatzes im Jahr 2010 entfielen auf Geschäfte in Staaten, die den Euro nicht als Währung führen, und wurden somit in Euro umgerechnet. Daher können sich die periodischen Schwankungen einzelner Währungen erheblich auf die Umsatzerlöse und Ergebnisse der SAP auswirken. Die Aufwertung des Euro im Verhältnis zu anderen Währungen wirkt sich dabei im Allgemeinen negativ, eine Abwertung des Euro positiv aus. Des Weiteren sind variabel verzinsliche Bilanzpositionen Zinsschwankungen ausgesetzt. Diese Bilanzpositionen beinhalten das Risiko einer negativen Auswirkung auf unsere Vermögens- und Ertragslage oder unseren Cashflow. Weiter gehende Informationen zu unseren Währungs- und Zinsrisiken und zu den entsprechenden Sicherungsaktivitäten finden sich in Textziffer (25) und (26) im Anhang zum Konzernabschluss.

Wir überwachen potenzielle Währungskursrisiken auf der Basis von Bilanzpositionen sowie erwarteten Zahlungsströmen kontinuierlich und verfolgen eine konzernweite Risikomanagement-Strategie, die unter anderem den bedarfsgerechten Einsatz derivativer Finanzinstrumente vorsieht. Zur Absicherung des Risikos aus Zinsschwankungen haben wir mehrere Zinsswap-Vereinbarungen abgeschlossen, mit denen wir den variablen Zins in einen festen Zinssatz umwandeln.

**Die Kosten von derivativen Instrumenten zur Absicherung aktienbasierter Vergütungsprogramme können die Vorteile dieser Maßnahmen übersteigen.**

Um die Effekte unserer aktienbasierten Vergütungsprogramme auf die Gewinn- und Verlustrechnung zu verringern und zukünftige Aufwendungen in diesem Zusammenhang zu begrenzen, setzen wir derivative Finanzinstrumente ein, wobei wir über den Umfang der Absicherung im Einzelfall entscheiden. Es ist jedoch nicht auszuschließen, dass die für die Absicherung dieser Vergütungsprogramme anfallenden Kosten die Vorteile, die daraus resultieren, übersteigen. Auch könnte sich die Entscheidung, keine wesentliche Absicherung vorzunehmen, als nachteilig erweisen.

Allerdings sehen wir das Risiko einer Auswirkung auf unsere Finanz- und Ertragslage oder unseren Cashflow als gering an.

**Projektrisiken**

**Die Implementierung von SAP-Software ist häufig mit einem beträchtlichen Einsatz von Ressourcen seitens des Kunden verbunden und unterliegt einer Vielzahl von Risiken, auf die wir oftmals keinen Einfluss haben.**

Hierbei sind in erster Linie folgende Risiken zu nennen:

- Es ist möglich, dass unsere qualifizierten SAP-Berater nicht sofort verfügbar sind, um die Kunden bei der Implementierung unserer Produkte zu unterstützen.
- Die Funktionen der implementierten Software entsprechen nicht den Erwartungen der Kunden oder die Software passt nicht zum Geschäftsmodell des Kunden.
- Externe Berater verfügen nicht über das erforderliche Know-how und die Ressourcen, um die Software erfolgreich zu implementieren.
- Die Implementierung der Software wird durch kundenindividuelle Entwicklungen destabilisiert.
- Die von der SAP angebotenen Maßnahmen zur Absicherung gegen technische Risiken werden von Kunden oder Partnern nicht umgesetzt.

Aufgrund dieser und anderer Risiken sind einigen unserer Kunden in Verbindung mit dem Kauf und der Installation von SAP-Softwareprodukten erhebliche Kosten für externe Beratung entstanden. Auch haben bei manchen Kunden Implementierungsprojekte länger gedauert als geplant. Wir können nicht vollständig ausschließen, dass längere Installationszeiten oder beträchtliche Kosten für externe Beratungsleistungen entste-

---

hen, dass Engpässe bei der Verfügbarkeit unserer qualifizierten Berater auftreten oder dass unsere Kosten die vereinbarten Erlöse bei Festpreisprojekten übersteigen. Erfolgreiche Implementierungsprojekte können daher zu Kundenregressforderungen führen, dem Ansehen der SAP schaden oder zukünftige Einnahmeverluste verursachen.

Unsere Kunden setzen mittlerweile verstärkt auf einen modularen Projektansatz zur Optimierung ihrer IT-Lösungen.

Wir nutzen für unsere Projekte ein nahtlos in die SAP-Projektmanagementmethode integriertes Risikomanagement und sichern durch abgestimmte Risiko- und Qualitätsmanagementprogramme die erfolgreiche Implementierung. Unserer Überzeugung nach sind die verbliebenen Einzelrisiken durch Aufnahme in unsere Finanzplanung und entsprechende Vorkehrungen ausreichend berücksichtigt. Zusätzlich haben wir uns gegen eine Reihe typischer Haftungsszenarien aus bekannten Projektrisiken in adäquater Höhe versichert. Dennoch kann nicht ausgeschlossen werden, dass sich durch dieses Risiko ein wesentlicher Einfluss auf die Vermögens-, Finanz- und Ertragslage ergibt.

### **Produkt Risiken**

#### **Dritte können sich unentdeckte Sicherheitsschwachstellen in unserer Software zunutze machen und dadurch der SAP oder unseren Kunden schaden.**

Im Lieferumfang unserer Produkte sind Funktionen enthalten, die den Schutz und die Sicherheit der Geschäftsdaten unserer Kunden gewährleisten sollen. Trotz dieser Sicherheitsfunktionen könnten unsere Produkte dem Zugriff unbefugter Personen oder Organisationen ausgesetzt sein. Angriffe dieser Art und ähnliche Störungen können die Sicherheit der von SAP-Kunden und -Partnern gespeicherten und übertragenen Daten gefährden und im Schadensfall zu bedeutsamen Regressforderungen gegenüber der SAP führen. Obwohl unsere Softwareprodukte vor ihrer Auslieferung getestet werden, können sie Sicherheitsschwachstellen enthalten. Dies gilt insbesondere für neu eingeführte Produkte oder neue Produktversionen. Tatsächliche oder angebliche Produktmängel könnten uns Produkthaftungs- oder Garantieansprüchen aussetzen. Außerdem könnten sie sich wesentlich auf unseren guten Ruf und damit auf künftige Verkaufserlöse für unsere Produkte und Services auswirken.

Wir begegnen diesem Risiko mit einem mehrstufigen Ansatz. Zum einen beinhaltet unser Entwicklungsprozess Maßnahmen zur Vermeidung von Sicherheitsproblemen, die bis zur Auslieferung der Produkte mehrmals überprüft werden. Zum anderen liefern wir unsere Anwendungen mit einer Sicherheitsdokumentation aus, die eine bestmögliche Integration in die Sicherheitsarchitektur des Kunden unter Ausnutzung der von SAP mitgelieferten Sicherheitsfunktionen ermöglichen soll. Sollte dennoch ein Sicherheitsproblem innerhalb der SAP-Software bekannt werden, so helfen wir den Kunden, den Mangel schnellstmöglich zu beheben. Obwohl wir umfangreiche Sicherheitstests durchgeführt haben und SAP-Produkte bislang keinen wesentlichen Sicherheitsangriffen ausgesetzt waren, kann eine negative Auswirkung auf unsere Vermögens-, Finanz- und Ertragslage durch dieses Risiko nicht ausgeschlossen werden.

#### **Wir nutzen Technologien, für die wir Lizenzen von Dritten erwerben. Wenn wir die Nutzungsrechte für diese Technologien verlieren, könnte dies die Implementierung unserer Produkte verzögern oder uns zur Zahlung höherer Lizenzgebühren zwingen.**

Wir lizenzieren zahlreiche Technologien von Drittanbietern, die wir in unsere bestehenden Produkte integrieren. Insgesamt können wir auf diese Technologien in hohem Maße angewiesen sein. Es kann jedoch nicht garantiert werden, dass die Lizenzen für diese Technologien nicht beendet werden, dass uns die Lizenzen in der Zukunft zu akzeptablen Bedingungen zur Verfügung stehen oder wir in der Lage sind, für unsere zukünftigen Produkte Lizenzen für Drittanbietersoftware zu erhalten. Änderungen bei Lizenzen für Drittanbietersoftware oder deren Verlust können zu einer beträchtlichen Erhöhung der Kosten für den Erwerb von Lizenzen führen oder zur Folge haben, dass SAP-Softwareprodukte nicht funktionsfähig sind oder ihre Leistungsfähigkeit wesentlich verringert ist. Infolgedessen fallen für uns unter Umständen weitere Entwicklungs- und Lizenzierungskosten an, damit wir die kontinuierliche Leistungsfähigkeit unserer Produkte gewährleisten können. Diese Risiken erhöhen sich, wenn wir ein Unternehmen oder geistiges Eigentum erwerben, dessen Stand an Drittanbieterlizenzen oder Produktstandards nicht dem SAP-Standard entspricht.

---

Wir begegnen diesem Risiko durch eine in der Regel ausführliche Due-Diligence-Prüfung vor der Lizenzierung, ein umfassendes Vertragsmanagement sowie eine konsequente Überwachung der Entwicklungsprozesse der SAP und eine regelmäßige Überprüfung des Investments.

**Falls wir nicht in der Lage sind, mit technologischen Innovationen und steigenden Kundenanforderungen Schritt zu halten, könnte unsere Wettbewerbsfähigkeit beeinträchtigt werden.**

Unser zukünftiger Erfolg hängt zum Teil von unserer Fähigkeit ab,

- unsere vorhandenen Produkte und Dienstleistungen weiter zu verbessern und auszubauen,
- neue Produkte zu entwickeln und einzuführen sowie neue Dienstleistungen anzubieten, die immer anspruchsvolleren Kundenanforderungen gerecht werden, mit technischen Entwicklungen Schritt halten und vom Markt angenommen werden.

Wir können nicht garantieren, dass wir neue Lösungen, Lösungserweiterungen oder Services vor unseren Wettbewerbern auf den Markt bringen oder ausreichend Umsatz erwirtschaften, um die für die Vermarktung dieser Produkte und Services notwendigen Forschungs- und Entwicklungsausgaben auszugleichen. Möglicherweise gelingt es uns nicht, technologische Verbesserungen vorausschauend zu entwickeln oder unsere Produkte an den technologischen Wandel, Gesetzesänderungen, neue Branchenstandards oder geänderte Kundenanforderungen anzupassen. Darüber hinaus sind wir möglicherweise nicht in der Lage, hochwertige Produkte, Produkterweiterungen und neue Produktversionen so zeitnah und kosteneffektiv herzustellen, dass sie mit den Anwendungen und Technologien unserer Mitbewerber konkurrieren können.

Wir passen unsere Organisation und Prozesse sowie unsere Produkte und Dienstleistungen laufend den Marktgegebenheiten an und arbeiten mit modernsten Technologien. Darüber hinaus führen wir umfassende Markt- und Technologieanalysen durch und betreiben Forschungsprojekte, um sicherzustellen, dass wir auch in Zukunft wettbewerbsfähig bleiben. In Anbetracht dieser Maßnahmen schätzen wir das Risiko einer negativen Auswirkung auf die Vermögens-, Finanz- und Ertragslage als gering ein.

**Nicht erkannte Mängel oder Verzögerungen bei neuen Produkten und Produkterweiterungen können für uns zu höheren Kosten führen und die Nachfrage nach unseren Produkten beeinträchtigen.**

Um unsere neuen und erweiterten Produkte zur Zufriedenheit der Kunden zu entwickeln, sind häufig lange Entwicklungs- und Testzeiten erforderlich. Diese Entwicklungstätigkeiten unterliegen verschiedenen Risiken. So könnten sich geplante Markteinführungen verzögern, Produkte unseren hohen Qualitätsanforderungen nicht vollkommen gerecht werden, Kundenerwartungen und Marktanforderungen nicht erfüllt oder lokale Standards und Anforderungen nicht eingehalten werden. Neue Produkte könnten noch nicht erkannte Fehler enthalten oder für die Verarbeitung großer Datenmengen nicht ausreichend geeignet sein. Wir sind unter Umständen nicht in der Lage, diese Mängel zu beheben und die Erwartungen unserer Kunden vollständig zu erfüllen. Aus diesem Grund ist es denkbar, dass Kunden die Rückerstattung geleisteter Zahlungen, Schadenersatz, den Austausch der SAP-Software oder sonstige Zugeständnisse verlangen. Die von uns angestrebte gleichzeitige Einführung mehrerer neuer Softwareprodukte könnte das Risiko von Mängeln und den damit einhergehenden negativen Folgen noch erhöhen. Erhebliche noch nicht erkannte Fehler oder Verzögerungen bei der Einführung neuer Produkte oder Produkterweiterungen können die Marktakzeptanz von SAP-Softwareprodukten beeinflussen und sich damit in erheblichem Maße negativ auf die Geschäftsaktivitäten und das Ansehen der SAP auswirken.

SAP-Software wird im Rahmen von Anwendungen und Prozessen eingesetzt, die für die Geschäftsabläufe beim Kunden von kritischer Bedeutung sind. Hinzu kommt, dass unsere Produkte relativ komplex sind. Daher besteht das Risiko, dass Kunden oder Dritte uns gegenüber Garantie, Leistungs- oder ähnliche Ansprüche geltend machen, sofern es zu tatsächlichen oder angeblichen Mängeln bei SAP-Softwareprodukten, bei der Erbringung von Dienstleistungen oder im Rahmen des Anwendungshosting kommt. Wir waren in der Vergangenheit solchen Garantie, Leistungs- oder ähnlichen Ansprüchen ausgesetzt und werden dies wohl auch in der Zukunft sein.

Unsere Vertragstexte enthalten in der Regel Bestimmungen, die darauf ausgerichtet sind, unsere Risiken aus tatsächlichen oder angeblichen Mängeln von SAP-Softwareprodukten oder der Erbringung von Dienstleistungen zu begrenzen. Diese

---

Bestimmungen können jedoch nicht alle Eventualitäten abdecken oder sie sind möglicherweise in der jeweils geltenden Rechtsordnung nicht rechtswirksam. Jegliche Ansprüche können – unabhängig davon, ob sie begründet sind oder nicht – beträchtliche Kosten und einen enormen Aufwand für wichtige Mitarbeiter des Managements zur Folge haben. Die mit solchen Vorfällen verbundene Öffentlichkeitswirkung kann sich auf die Nachfrage nach unserer Software und unser Ansehen auswirken.

Wir wirken den beschriebenen Risiken jedoch durch ein umfangreiches Projektmanagement und Projektmonitoring, strenge und regelmäßige nach ISO 9001 zertifizierte Qualitätssicherungsmaßnahmen sowie Programmrisikobeurteilungen während der Produktentwicklung entgegen. Die hierdurch im Allgemeinen erzielte hohe Qualität unserer Produkte wird durch die konstant hohen Kundenzufriedenheitswerte bestätigt, die wir bei unseren regelmäßigen Kundenbefragungen erzielen. Das Risiko einer signifikanten Beeinträchtigung der geplanten Ergebnisentwicklung durch Produktmängelansprüche von unseren Kunden schätzen wir daher als gering ein.

**Unsere Strategie für die Technologieplattform kann scheitern oder dazu führen, dass sich die Kundennachfrage für bestimmte andere Produkte rückläufig entwickelt.**

Die Technologieplattform der SAP umfasst neben SAP NetWeaver-Plattformkomponenten nun auch die Sybase Unwired Platform sowie eine On-Demand-Plattform und In-Memory-Technologie. Der Erfolg dieser erweiterten Technologieplattform hängt davon ab, dass wir über ein dynamisches Netzwerk von unabhängigen Softwareanbietern (Independent Software Vendors, ISVs) verfügen, die eigene Geschäftsanwendungen auf Basis der SAP-Technologieplattform entwickeln. Genau wie bei anderen offenen Plattformen könnte die höhere Flexibilität der Plattform, die die Verwendung von Daten ohne Bezug zu SAP-Software ermöglichen soll, eine rückläufige Entwicklung der Kundennachfrage für bestimmte andere SAP-Software nach sich ziehen. Eine schlechte Resonanz auf die SAP-Technologieplattform vonseiten der Kunden, die Entwicklung besserer Technologien durch Wettbewerber oder erhebliche Produktmängel können wesentliche nachteilige Auswirkungen auf unsere Geschäftstätigkeit, unsere Finanz- und Ertragslage oder unseren Cashflow haben.

Um diesen Risiken entgegenzuwirken, bietet die SAP Unterstützung für ISV-Partner, die die erweiterte SAP-Technologieplattform nutzen wollen. So weisen wir die ISV-Partner auf Geschäftschancen hin und unterstützen sie so bei ihrer Produktplanung. Wir vermitteln Architektur- und Technikwissen, das ihnen die Anwendungsentwicklung auf Basis von SAP-Technologie erleichtert. Darüber hinaus stellen wir über einen ausführlichen Zertifizierungsprozess sicher, dass alle von Drittanbietern entwickelten Lösungen eine gleichbleibend hohe Qualität bieten.

### **Sonstige Betriebsrisiken**

**Dritte können uns der Verletzung von Rechten an geistigem Eigentum beschuldigen. Dies könnte dazu führen, dass gegen uns Schadenersatzforderungen geltend gemacht werden und unsere Fähigkeit, bestimmte Technologien zu nutzen, zukünftig eingeschränkt wird.**

In der Vergangenheit haben uns Dritte der Verletzung von Rechten an geistigem Eigentum beschuldigt und könnten dies auch in Zukunft tun. Wir glauben, zunehmend solchen Klagen ausgesetzt zu sein, da die Zahl der Produkte in unserem Branchensegment wächst, wir unsere Produkte auf neue Branchensegmente ausweiten und sich die Funktionen von Produkten überschneiden.

Die rechtliche Auseinandersetzung mit weiteren begründeten oder unbegründeten Ansprüchen dieser Art kann zur Folge haben, dass wir von der Nutzung bestimmter Technologien in unseren Produkten ausgeschlossen werden. Darüber hinaus können diese Ansprüche zu einem hohen Zeitaufwand, kostenintensiven Gerichtsverfahren und zu Zahlungen von Schadenersatz an Dritte und unter Umständen auch zu Strafzahlungen führen. Dies kann auch zur Folge haben, dass wir auf ungünstige Lizenzvereinbarungen eingehen müssen, es zu Verzögerungen bei der Auslieferung von Produkten kommt, der Vertrieb unserer Produkte gerichtlich untersagt wird, Produkte umfassend oder teilweise neu entwickelt werden müssen, Kunden Investitionsentscheidungen hinausschieben müssen und unser Ansehen geschädigt wird.

Jede Software enthält zahlreiche Komponenten oder Module für unterschiedliche Funktionen. Einige dieser Funktionen können mit Rechten an geistigem Eigentum verbunden sein. Es

---

kann vorkommen, dass sich die Rechte eines Dritten an geistigem Eigentum auf ähnliche technische Aspekte beziehen wie eine oder mehrere Technologien eines oder mehrerer unserer Produkte. Wir achten die Rechte Dritter an geistigem Eigentum. Es gibt keine Garantie dafür, dass wir künftig nicht durch die Rechte Dritter an geistigem Eigentum von der Nutzung bestimmter Technologien ausgeschlossen werden oder dass wir zur Nutzung dieser Technologien nicht auf ungünstige Lizenzvereinbarungen eingehen oder hohe Lizenzgebühren zahlen müssen.

Zur Bewertung und Kontrolle von spezifischen Risiken im Zusammenhang mit geistigem Eigentum wurde neben dem Global Compliance Office ein Team für Intellectual Property Compliance eingesetzt. Aufgaben dieses Teams sind die Überprüfung bestehender Praktiken im Umgang mit geistigem Eigentum, die Erstellung interner Richtlinien sowie die Überwachung ihrer Einhaltung.

Außerdem wird bei der Entwicklung von Softwarelösungen in der Softwarebranche immer stärker Open-Source-Software eingesetzt. Dementsprechend integrieren wir gezielt bestimmte Open-Source-Softwarekomponenten von Drittanbietern in unsere Software. Der Softwarecode, der in diesen Komponenten beziehungsweise in der Software, in die diese Komponenten integriert wurden, enthalten ist, muss gemäß den entsprechenden Open-Source-Lizenzen unter Umständen frei zugänglich sein. SAP trifft vorsorgliche Maßnahmen zum Schutz von und vor Open-Source-Software. Dennoch ist nicht auszuschließen, dass wir künftig aufgrund von Ansprüchen Dritter unsere Produkte oder Drittanbietersoftware, auf die wir angewiesen sind, gemäß den Bedingungen einer Open-Source-Lizenz allgemein zugänglich machen müssen. Daher können wir erhebliche negative Auswirkungen durch dieses Risiko auf unsere Vermögens-, Finanz- und Ertragslage nicht völlig ausschließen.

**Wir sind Klagen und Gerichtsverfahren ausgesetzt, die negative Folgen haben können.**

Wir sind mit unterschiedlichen Ansprüchen und Gerichtsverfahren konfrontiert, einschließlich Klagen und Prozessen, in die von uns erworbene Unternehmen involviert sind. Negative Folgen einiger oder aller dieser gegen uns gerichteten Ansprüche oder Klagen können zur Zahlung eines beträchtlichen Schadenersatzes oder zu einer einstweiligen Verfügung führen, was unsere Geschäftstätigkeit beeinträchtigen könnte. Für

den TomorrowNow-Rechtsstreit haben wir eine Rückstellung in Höhe von 997 Mio. € gebildet. Derzeit ist das Management der Ansicht, dass der Ausgang aller übrigen anhängigen Vorgänge, sowohl einzeln als auch insgesamt, keine wesentliche nachteilige Auswirkung auf unsere Geschäftstätigkeit, unsere Finanz- und Ertragslage oder unseren Cashflow haben wird. Der Ausgang von Prozessen und sonstigen Klagen unterliegt aber naturgemäß einer erheblichen Ungewissheit. Außerdem kann sich die Einschätzung dieser Angelegenheiten durch das Management in der Zukunft ändern. Der tatsächliche Ausgang von Gerichtsverfahren und sonstigen Ansprüchen kann von den Einschätzungen des Managements aus früheren Zeiträumen abweichen, was sich in erheblichem Maße negativ auf unsere Geschäftstätigkeit, unsere Finanz- und Ertragslage, unseren Cashflow sowie den Ruf der SAP auswirken kann.

**Es gelingt uns möglicherweise nicht, neue Unternehmen auf effiziente Weise zu akquirieren und zu integrieren oder erfolgreich mit strategischen Partnern zusammenzuarbeiten.**

Zur Ergänzung oder Erweiterung unserer Geschäftstätigkeit haben wir in der Vergangenheit sowohl Unternehmen als auch Produkte und Technologien zugekauft. Derartige Erwerbe planen wir auch für die Zukunft. Die Verhandlungen zu möglichen Akquisitionen oder Partnerschaften sowie die Integration zugekaufter Unternehmen, Produkte oder Technologien erfordern die Zeit, Aufmerksamkeit und Ressourcen des Managements und der Mitarbeiter. Darüber hinaus sind Akquisitionen mit zahlreichen Risiken behaftet, unter anderem:

- Wir sind möglicherweise nicht in der Lage, das erworbene Unternehmen einschließlich verschiedener Geschäfts- und Lizenzmodelle erfolgreich zu integrieren.
- Wir sind möglicherweise nicht in der Lage, die übernommenen Technologien und Produkte in vorhandene Produkte und Technologien zu integrieren.
- Es gelingt uns unter Umständen nicht, wichtige Fach- und Führungskräfte des übernommenen Unternehmens zu halten.
- Wir könnten unwissentlich wesentliche Verpflichtungen des akquirierten Unternehmens übernehmen. Hierzu gehören Eventualverbindlichkeiten im Zusammenhang mit Rechtsstreitigkeiten, Steuern oder Rechten an geistigem Eigentum oder andere Verpflichtungen, die im Rahmen des Due-Diligence-Prozesses möglicherweise nicht entdeckt werden.



- Wir könnten Forderungen oder wesentliche Barauslagen übernehmen.
- Es könnte sich schwierig gestalten, interne Kontrollsysteme, Prozesse und Richtlinien einzuführen, wiedereinzusetzen oder aufrechtzuerhalten.
- Beziehungen zu Kunden, Partnerunternehmen oder Dritt-anbietern von Produkten oder Technologien könnten negativ beeinflusst werden.
- Die Integration der Buchhaltungs-, Personalwirtschafts- und anderer administrativer Systeme des übernommenen Unternehmens könnte Probleme bereiten.
- Wir könnten durch gesetzliche Bestimmungen eingeschränkt werden.
- Die Geschäftspraktiken der erworbenen Unternehmen könnten von unseren eigenen Compliance-Richtlinien abweichen.

Außerdem könnten bestimmte zugekaufte Unternehmen nicht die erwarteten Ergebnisse erzielen, was Wertminderungen des Geschäftswertes und sonstiger immaterieller Vermögenswerte zur Folge hätte. Derartige Abschreibungen könnten signifikant negative Auswirkungen auf die operative Marge und das Betriebsergebnis haben. Darüber hinaus sind wir verschiedene strategische Partnerschaften eingegangen und planen, künftig weitere einzugehen, um unter anderem neue Produkte und Services zu entwickeln. Es besteht keine Gewähr, dass diese Produkte und Services erfolgreich entwickelt werden. Außerdem können wir nicht ausschließen, dass unerwartete und wesentliche Ansprüche aus solchen Partnerschaften entstehen. Diesen Risiken können wir unter Umständen nicht entgegenwirken und können somit möglicherweise nicht von den Vorteilen profitieren, die wir mit diesen Akquisitionen oder Partnerschaften bezwecken. Daher kann eine negative Auswirkung auf unsere Geschäftstätigkeit, unsere Finanz- und Ertragslage oder unseren Cashflow nicht ausgeschlossen werden.

Wir begegnen diesen Risiken in Bezug auf Akquisitionen durch eine Vielzahl von methodischen und organisatorischen Maßnahmen. So nehmen wir eine Due-Diligence-Prüfung des zu erwerbenden Unternehmens oder Vermögenswertes vor, die rechtliche, finanzielle und technische Themen umfasst. Vor Abschluss jedes Erwerbs führen wir außerdem eine ganzheitliche Risikobewertung durch, um wesentliche Transaktions- und Integrationsrisiken zu ermitteln. Außerdem haben wir eine

detaillierte standardisierte Integrationsplanung entwickelt, die von speziellen Integrationsteams umgesetzt wird. Aus diesem Grund gehen wir von einem minimierten Risiko aus. Dennoch kann eine Auswirkung auf unsere Vermögens-, Finanz- und Ertragslage oder unseren Cashflow nicht ausgeschlossen werden.

**Unsere Maßnahmen zur Gewährleistung der IT-Sicherheit könnten durchbrochen oder beeinträchtigt werden oder es könnte zu einem ungeplanten Ausfall der IT-Systeme kommen.**

Unsere Kernprozesse, wie Softwareentwicklung, Vertrieb, Kundenbetreuung und Finanzvorgänge, sind von unserer IT-Infrastruktur und unseren IT-Anwendungen abhängig. Angriffe durch schädliche Computerprogramme, Sabotage durch Hacker, Naturkatastrophen oder ein Versagen der zugrunde liegenden Technologie (beispielsweise des Internets) könnten einen Ausfall unserer Infrastruktur bedingen. Solche Zwischenfälle könnten in erheblichem Maße den Ausfall von Dienstleistungen zur Folge haben und Produktionsausfälle, Wiederherstellungskosten sowie Kundenregressforderungen nach sich ziehen. Eine Auswirkung auf unsere Vermögens-, Finanz- und Ertragslage oder unseren Cashflow kann nicht ausgeschlossen werden.

Allerdings wird unsere IT-Infrastruktur durch eine Vielzahl von Abwehrmaßnahmen geschützt. Zu nennen sind hier unter anderem Firewalls, Virenabwehrsoftware, Intrusion-Detection-Systeme (das heißt Software zur Erkennung von Angriffen gegen Rechnersysteme) und Hochverfügbarkeitslösungen für unsere IT-Landschaft einschließlich der Infrastrukturen für Entwicklung und Qualitätssicherung. Darüber hinaus halten wir uns an verschiedene anerkannte Standards und werden regelmäßig nach ISO 9001 (Qualitätsmanagement), ISO 27001 (Managementsystem für Informationssicherheit) und dem internationalen Standard BS 25999-2 (Business Continuity Management) zertifiziert. Dennoch können wir nicht voraussehen, ob die genannten Vorkehrungen in ausreichendem Maße sicherstellen, dass der Geschäftsbetrieb der SAP nicht erheblich beeinträchtigt wird.

**Wir könnten Angriffen ausgesetzt sein, die den Zugriff auf unsere Produkte und Dienstleistungen für Nutzer erschweren oder verhindern oder die den Diebstahl oder Missbrauch von geistigem Eigentum oder vertraulichen Daten zur Folge haben.**

---

Die Produkte und Services der SAP – auch solche, die von unseren Kunden über das Internet genutzt werden – sind von unserer IT-Infrastruktur und unseren IT-Anwendungen abhängig. Unbefugte Benutzer könnten versuchen, sich als berechtigte Nutzer zu tarnen und auf unsere Systeme zuzugreifen, schädliche Software einzuführen oder geistiges Eigentum und vertrauliche Daten der SAP zu stehlen, unbefugt zu nutzen oder zu sabotieren. Ein Verstoß gegen unsere IT-Sicherheitsmaßnahmen könnte Produktionsausfälle, Wiederherstellungskosten oder Rechtsstreitigkeiten mit Kunden und Partnern nach sich ziehen und sich negativ auf unsere Finanz- und Ertragslage auswirken.

Wir verwenden IT-Sicherheitsprogramme, um die identifizierten Risiken laufend zu überwachen. Die Anzahl der Angriffe nimmt stark zu und die Methoden verändern sich ständig. Daher überprüfen wir kontinuierlich, ob die genannten Vorkehrungen in ausreichendem Maße sicherstellen, dass der Geschäftsbetrieb der SAP nicht erheblich beeinträchtigt wird. Darüber hinaus halten wir uns an verschiedene anerkannte Standards und werden regelmäßig nach ISO 9001 (Qualitätsmanagement), ISO 27001 (Managementsystem für Informationssicherheit) und dem internationalen Standard BS 25999-2 (Business Continuity Management) zertifiziert.

**Wir könnten unter Umständen nicht in der Lage sein, erforderliche Rechte an geistigem Eigentum zu erwerben, zu lizenzieren und durchzusetzen.**

Wir schützen unser geistiges Eigentum durch zahlreiche Maßnahmen. Dazu gehören die Anmeldung von Patenten und Marken, die Eintragung von Urheberrechten, die Abmahnung von Urheberrechts- und Markenverletzungen, der Abschluss von Lizenz- und Vertraulichkeitsvereinbarungen sowie technische Vorkehrungen zum Schutz der Eigentumsrechte an unseren Produkten. Dennoch können wir nicht garantieren, dass diese Schutzmaßnahmen ausreichen, um Dritte am unbefugten Erwerb, Verkauf oder an der unbefugten Nutzung der aus unserer Sicht geschützten Technologien und Informationen zu hindern. Da alle diese Maßnahmen nur begrenzten Schutz bieten, könnten unsere Eigentumsrechte angefochten, für ungültig erklärt, für nicht durchsetzbar erachtet oder auf andere Weise beeinträchtigt werden. Geistiges Eigentum könnte durch Mitarbeiter, Partner oder Dritte offengelegt oder widerrechtlich verwendet werden. Auch kann nicht ausgeschlossen werden, dass Dritte selbst Technologien entwickeln, die unserer Technologie im Wesentlichen entsprechen oder dieser überlegen

sind. Des Weiteren ist es möglich, dass Dritte Technologie und Informationen, die wir als geschützt betrachten, rückentwickeln oder anderweitig erwerben und nutzen. Daher sind wir möglicherweise nicht in der Lage, unsere Eigentumsrechte vor dem Kopieren und der unrechtmäßigen Nutzung durch Dritte zu schützen, was unsere Wettbewerbsposition und unsere Finanzlage negativ beeinflussen und zu Umsatzeinbußen führen könnte. Etwaige rechtliche Schritte, mit denen wir auf Durchsetzung unserer Eigentumsrechte klagen, können mit hohen Kosten verbunden sein, die Unternehmensleitung vom Tagesgeschäft abhalten und zu Klagen gegen uns führen, die unser Betriebsergebnis negativ beeinflussen können. Darüber hinaus könnte ein Partner oder Lieferant in derartige Vollstreckungsklagen involviert sein, was es uns oder unseren Kunden möglicherweise erschweren würde, die Produkte dieses Partners oder Lieferanten zu nutzen. Auch bieten die Rechtsordnungen und Gerichte einiger Länder unter Umständen keine wirksamen Mittel, um unsere Rechte an geistigem Eigentum durchzusetzen.

**Wir könnten unter Umständen nicht in der Lage sein, unsere kritischen Informationen oder Vermögenswerte zu schützen oder unseren Geschäftsbetrieb vor Unterbrechungen zu bewahren.**

Als globales Softwareunternehmen hängen wir in erheblichem Maße von einem umfassenden Informationsaustausch sowie der Verfügbarkeit unserer Kommunikations- und IT-Infrastrukturen ab. Wir haben eine Reihe von Maßnahmen ergriffen, um die Sicherheit von Informationen, IT-Ressourcen und anderen Sachanlagen zu gewährleisten. Es besteht dennoch die Gefahr der Industriespionage, eines Missbrauchs oder eines Diebstahls von Informationen und Sachanlagen oder einer Beschädigung von Sachanlagen, sowohl durch Personen, die sich unbefugt Zutritt zu unseren Gebäuden verschaffen könnten, als auch durch autorisierte Personen mit entsprechenden Zugangsberechtigungen zu Gebäuden, Systemen oder Informationen. Jeglicher Missbrauch, Diebstahl oder Sicherheitsverstoß dieser Art könnte sich negativ auf unsere Geschäftstätigkeit, unsere Finanz- und Ertragslage oder unseren Cashflow auswirken.

Zu den Maßnahmen zur Minimierung dieses Risikos zählen beispielsweise physische Zutrittskontrollsysteme zu Gebäuden und mehrstufige Zugangskontrollen, Kameraüberwachung

---

sowie der Einsatz von Sicherheitsdiensten in allen kritischen Bereichen. Der Zugang zu Informationen und Informationssystemen wird durch umfassende Berechtigungskonzepte kontrolliert. Management und Mitarbeiter werden durch Schulungsmaßnahmen regelmäßig sensibilisiert und geschult. Diese Maßnahmen passen wir laufend den aktuellen Bedürfnissen an.

**Unser Versicherungsschutz könnte nicht ausreichen, um aus Schadenszahlungen resultierende negative Auswirkungen auf unsere Finanz- und Ertragslage oder unseren Cashflow zu vermeiden.**

Durch ein angemessenes Versicherungsprogramm sichern wir uns gegen verschiedene Risiken ab. Zielsetzung ist es, die finanziellen Auswirkungen von Schadensfällen auszuschließen oder zu mindern, soweit dies zu vertretbaren Kosten umsetzbar ist. Trotz dieser Maßnahmen sind bestimmte Risikokategorien derzeit nicht zu vertretbaren Konditionen versicherbar. Selbst bei vorhandenem Versicherungsschutz besteht die Möglichkeit, dass bestimmte Schadensfälle davon ausgenommen sind und unsere Schäden nicht oder nur teilweise ausgeglichen werden. Darüber hinaus können wir nicht garantieren, dass die Versicherungsunternehmen im Schadensfall ihren Verpflichtungen nachkommen können. Sollte dieses Risiko eintreten, könnten sich dadurch erhebliche negative Auswirkungen auf unsere Geschäftstätigkeit, unsere Finanz- und Ertragslage oder unseren Cashflow ergeben.

In Anbetracht des Umfangs der Versicherungsverträge und der Auswahl der Versicherungsunternehmen sowie unserer ständigen Analyse und Anpassung des Versicherungsprogramms schätzen wir das Risiko einer negativen Auswirkung auf die Vermögens-, Finanz- und Ertragslage als gering ein.

**Wir könnten im Zusammenhang mit unseren Venture-Capital-Investitionen Verluste erleiden.**

Wir planen, uns auch in der Zukunft an Technologieunternehmen zu beteiligen. Gegenwärtig arbeiten viele dieser Unternehmen noch mit Verlusten und benötigen Kapitalzuführungen durch ihre Investoren. Änderungen des geplanten Geschäftsverlaufs dieser Beteiligungsunternehmen haben sich in der Vergangenheit zum Teil negativ auf ihre Ergebnisentwicklung und damit auf den Wert unserer Investitionen ausgewirkt und dies könnte auch künftig der Fall sein. Darüber hinaus sind

Verluste aus Unternehmensbeteiligungen steuerlich oft nur eingeschränkt nutzbar, woraus sich negative Auswirkungen auf unsere effektive Steuerquote ergeben können.

Das beschriebene Risiko ist jedoch aufgrund des beschränkten Umfangs unserer Venture-Capital-Aktivitäten gering und eine signifikante Auswirkung auf die geplante Vermögens-, Finanz- und Ertragslage oder unseren Cashflow damit unwahrscheinlich. Wir wirken diesem Risiko durch eine Diversifikation unseres Portfolios und ein aktives Investitionsmanagement entgegen.

### **Gesamtrisikoprofil**

2010 lagen unsere Hauptrisiken gemäß der prozentualen Verteilung des Gesamtrisikoprofils in der Risikokategorie Produkt Risiken, gefolgt von Finanzrisiken, Projektrisiken und sonstigen Betriebsrisiken. Zusammen stellen die zuvor erwähnten Risikokategorien 69 % des relativen Anteils am Gesamtrisikoprofil dar. Alle anderen Risikokategorien sind im Vergleich derzeit für die SAP von untergeordneter Bedeutung.

Keines der im Rahmen unseres Risikomanagement-Systems identifizierten quantifizierbaren Einzelrisiken erreichte im Berichtszeitraum den bei SAP festgelegten Schwellenwert für das Vorliegen eines bestandsgefährdenden Risikos. Die prozentualen Anteile der Risiken mit der Skalierung „hohes Risiko“ und „mittleres Risiko“ sind 2010 gestiegen, da einige der als „gering“ bewerteten Risiken konsolidiert und aggregiert wurden. Dies hatte jedoch keine Auswirkung auf das Gesamtrisikoprofil. Die Risiken des Bereichs „hohes Risiko“ lagen zum Jahresende auf einem Niveau von 9 % (2009: 3 %), die Risiken im Bereich „mittleres Risiko“ stiegen im Berichtsjahr auf 34 % (2009: 13 %). Als Folge der oben genannten Konsolidierung hat sich der Anteil der Risiken der Skalierung „geringes Risiko“ im Laufe des Jahres auf einen Wert von 58 % (2009: 84 %) verringert. Das Gesamtrisikoprofil hat sich im Jahresvergleich nicht wesentlich verändert. Nach unserer Überzeugung weisen die vorstehend identifizierten Risiken weder einzeln noch in ihrer Gesamtheit bestandsgefährdenden Charakter auf. Aus unserer Sicht überwiegen die im vorliegenden Lagebericht beschriebenen Geschäftschancen der SAP deutlich. Angesichts unseres Risikoprofils sind wir zuversichtlich, den Herausforderungen, die sich aus den genannten Risiken ergeben, aufgrund unserer führenden Stellung im Markt, unserer technologischen Innovationskraft, unserer engagierten Mitarbeiter sowie unserer strukturierten Prozesse zur Risikofrüherkennung auch im Jahr 2011 erfolgreich begegnen zu können.

---

## **MASSNAHMEN UND EREIGNISSE NACH GESCHÄFTSJAHRESENDE**

Im Februar 2011 erwarb SAP von der Secude AG Software für das Sicherheits-, Identitäts- und Zugriffsmanagement sowie dazugehörige Vermögenswerte wie Entwicklungs- und Beratungsressourcen.

Für weitere Informationen zu dieser Akquisition verweisen wir auf das Kapitel Akquisitionen.

Am 28. Februar 2011 haben wir 500 Mio. € des Akquisitionsdarlehens getilgt. Der am 31. Dezember 2010 ausstehende Saldo dieses Akquisitionsdarlehens von 1 Mrd. € ist gemäß Vertrag im Mai 2012 fällig (siehe Textziffer (18b)). Durch die vorzeitige Rückzahlung werden sich im Jahr 2011 unsere Zinsaufwendungen als Komponente des Finanzergebnis, netto um einen einstelligen Millionenbetrag reduzieren.

---

## AUSBLICK

### Voraussichtliche weltwirtschaftliche Entwicklung

Eine weitere weltwirtschaftliche Belebung erwarten renommierte Wirtschaftsforschungsinstitute für 2011: Sie gehen davon aus, dass die Finanzmärkte sich normalisieren, Unternehmen ihre Refinanzierungsmöglichkeiten verbessern und mehr investieren und dass der Konsum mit steigendem Vertrauen der Verbraucher in den wirtschaftlichen Aufschwung zunimmt. Entsprechend soll das wirtschaftliche Wachstum für das gesamte laufende Jahr 2011 mittlere einstellige Prozentwerte erreichen, wobei die Erholung im ersten Halbjahr demnach langsamer verläuft, da weitere Konjunkturprogramme der Regierungen zu Ende gehen. Für das zweite Halbjahr wird indes mit zunehmendem eigenem Wachstum der Wirtschaft eine schnellere Erholung erwartet.

Allerdings bleibt nach Ansicht der Institute die ungleiche Entwicklung von Industrie- und Schwellenländern auch in diesem Jahr bestehen: Einem voraussichtlich verhaltenen Wachstum aufgrund angespannter Arbeitsmärkte in den Industrieländern wird ein deutlich zügigerer Aufschwung in den Schwellenländern gegenüberstehen.

Innerhalb der Region Europa, Naher Osten, Afrika wird für die Wirtschaft der Eurozone im laufenden und im kommenden Jahr ein Wachstum nur im unteren einstelligen Prozentbereich erwartet – dies allerdings stetig und ohne Rückgänge, so die Analysten. Stützende Faktoren für die Wirtschaft des Eurogebietes sind demnach die weltwirtschaftliche Belebung und die steigende Nachfrage nach Exporten sowie die private Inlandsnachfrage. Problematisch bleibt hingegen die Lage auf den europäischen Arbeitsmärkten; sie wird sich voraussichtlich nur langsam entspannen. Den weiteren Aufschwung der deutschen Wirtschaft wird die verhältnismäßig schwache Nachfrage ihrer Handelspartner nach Exporten bremsen. Dennoch erreicht Deutschland im Laufe des Jahres 2011 wieder ein ähnliches Bruttoinlandsprodukt wie vor der Krise, so die Analysten. Die Wirtschaft in den mittel- und osteuropäischen Ländern soll 2011 etwas schneller wachsen als in den Ländern der Eurozone, allerdings langsamer als in den außereuropäischen Schwellenländern.

In der Region Amerika ist für 2011 nach Meinung der Institute mit einer weiteren langsamen Erholung der US-amerikanischen Wirtschaft zu rechnen. Ursache für das geringe Tempo sollen dabei die schwierige Arbeitsmarktlage und ein geringes Vertrauen der Verbraucher in den wirtschaftlichen Aufschwung sein.

In der Region Asien-Pazifik-Japan schließlich erwarten die Institute für Japan, dass die beiden Konjunkturpakete von Ende 2010 Wirkung zeigen und für Wachstumsraten im unteren einstelligen Prozentbereich sorgen. Erst für 2012 dürfte demnach mit stärkerer Nachfrage der Privathaushalte, einer Entspannung am Arbeitsmarkt und höheren Unternehmensgewinnen zu rechnen sein.

Die Institute gehen bei ihren Prognosen davon aus, dass sich die Weltwirtschaft im kommenden Jahr möglicherweise noch langsamer entwickelt als gemeldet. Schwache Märkte für Immobilien, hohe Staatsverschuldung als Folge umfassender Konjunkturprogramme in den vorangegangenen Jahren, Spannungen auf den Finanzmärkten oder ansteigende Rohstoffpreise könnten sogar zu einem geringeren Wachstum führen als zurzeit prognostiziert. Eine Korrektur nach oben wäre dagegen vor allem dann erforderlich, wenn Unternehmen und Privatpersonen mehr Vertrauen in den Wirtschaftsaufschwung gewinnen sollten als bisher erwartet.

### Entwicklung des IT-Marktes: Ausblick auf 2011

Für das Jahr 2011 rechnet das US-amerikanische Marktforschungsunternehmen International Data Corporation (IDC) mit einem Wachstum der weltweiten Investitionen in IT im mittleren einstelligen Prozentbereich. Auch die Investmentbank Goldman Sachs erwartet ein ähnliches Ergebnis. Zurückhaltender mit ihren Prognosen ist dagegen die Schweizer Großbank UBS: Sie sagt für 2011 nur ein geringfügiges Wachstum des weltweiten IT-Marktes voraus.

Dabei soll sich die Dynamik des Hardwaremarktes gegenüber 2010 verlangsamen, da viele Unternehmen ihre Hardwareausstattung nach der Krise bereits erneuert haben und im laufenden Jahr keine weiteren Investitionen planen dürften. Dank guter Zuwächse bei mobilen Endgeräten, vor allem Smartphones, und Netzwerkausstattungen wird der Hardwaremarkt aber insgesamt trotzdem deutlich wachsen, melden IDC und Goldman Sachs übereinstimmend.

---

Die Ausgaben für Software und Services dagegen sollen 2011 stärker zunehmen als 2010. Als Wachstumstreiber sieht IDC hier vor allem Cloud Services, mobile Anwendungen und soziale Netzwerke. Diese Angebote zählen für das Institut 2011 nicht mehr zu den Innovationen, sondern sind inzwischen etabliert und stehen somit für eine grundlegende Weiterentwicklung des Softwaremarktes. Bis 2014 sollen laut IDC zum Beispiel mehr als ein Drittel aller Softwareinvestitionen in Cloud Services fließen.

IDC erwartet, dass auch bei den IT-Investitionen die Schwellenländer das Wachstum anführen werden. Die Wachstumsraten könnten hier ein Mehrfaches der Werte in den Industrieländern betragen. Am deutlichsten soll dieser Vorsprung in den BRIC-Staaten (Brasilien, Russland, Indien und China) ausfallen, wo 2011 fast die Hälfte aller IT-Investitionen der Schwellenländer anfallen dürfte. Unter den BRIC-Staaten nimmt wiederum China die Führungsposition ein und könnte bis 2013 sogar Japan als die zweitgrößte IT-Nation der Welt überholen. Dass die IT-Wirtschaft der Schwellenländer schon seit Jahren im weltweiten Vergleich überdurchschnittlich wächst, soll nach Meinung von IDC dazu führen, dass sie 2011 über ein Viertel des weltweiten IT-Marktes ausmachen wird, bis 2014 sogar fast ein Drittel.

Innerhalb der Region Europa, Naher Osten, Afrika erwartet die UBS ein spürbares Wachstum des IT-Sektors, dabei die deutlichste Steigerung in Deutschland. Auch IDC rechnet damit, dass die IT-Investitionen 2011 in Deutschland stärker zunehmen als im übrigen Westeuropa. 2012/13 sollen diese Wachstumsraten laut IDC allerdings schon wieder rückläufig sein. In den USA verharren die IT-Investitionen 2011 laut UBS und IDC auf ähnlicher Höhe wie 2010 im mittleren einstelligen Prozentbereich. Hier soll das Wachstum der IT-Ausgaben in erster Linie von mittelständischen Unternehmen ausgehen. Für die Region Asien-Pazifik-Japan schließlich kündigt IDC ein Wachstum im oberen einstelligen Prozentbereich an, für Japan allerdings nur geringfügig steigende IT-Investitionen. Erst in den Jahren 2012 – 14 sollen die Wachstumsraten hier wieder höher sein.

Trotz dieser insgesamt positiven Prognosen hält IDC es für möglich, die Vorhersagen im Jahresverlauf nach unten anpassen zu müssen. Nachteilig auf die IT-Wirtschaft könnte sich etwa auswirken, wenn in den USA und Westeuropa die Arbeits-

losigkeit nicht zurückgeht, der Immobilienmarkt angespannt bleibt und die Regierungen wegen hoher Staatsverschuldung weiterhin einen Sparkurs einschlagen.

## **Voraussichtliche Entwicklung der SAP**

### **Umsetzung unserer Strategie**

Wir wollen mit unserem gesamten Produkt- und Serviceportfolio ein profitables Wachstum erzielen. Unsere Strategie zielt darauf ab, durch herausragende On-Premise-, On-Demand- und On-Device-Anwendungen unseren Zielmarkt zu verdoppeln und uns auf bahnbrechende Innovationen zu konzentrieren. Unserer Ansicht nach positionieren wir uns damit günstig in Marktsegmenten, die höhere Wachstumsraten aufweisen als das prognostizierte globale Bruttoinlandsprodukt. Unsere Investitionen in Ländern wie Brasilien, Russland, Indien und China werden unsere Position in diesen Regionen mit überdurchschnittlichem Wachstum stärken. Gleichzeitig wollen wir unseren Marktanteil in allen Regionen durch eine stärkere Ausrichtung auf Branchen und Geschäftsbereiche erhöhen.

Dieses Wachstum werden wir aber nur erreichen, wenn es uns gelingt, zukunftsweisende Lösungen auf den Markt zu bringen und Mehrwert für unsere Kunden zu schaffen. Um unser Versprechen gegenüber unseren Kunden einzulösen und Produkte schneller im Markt einführen zu können, verschlanken wir unsere internen Strukturen. Gleichzeitig investieren wir in unsere Vermarktungskanäle, um unsere Vertriebskapazität insgesamt aufzustocken, und bauen unser Partnernetz aus. Damit schaffen wir die Voraussetzungen für weiteres Wachstum und Innovationen.

### **Ausbau des Vermarktungskonzepts und der Kundenbeziehungen**

Die SAP wird ihre Produkte und Services auch künftig nach Regionen, Marktsegmenten und Branchen vermarkten. Innerhalb der Regionen beabsichtigen wir, unsere Vertriebskapazitäten primär in den Märkten mit dem weltweit stärksten Wachstum aufzustocken. Darüber hinaus wollen wir in die Weiterentwicklung unseres Vermarktungskonzepts investieren, um Kunden in speziellen Geschäftsbereichen (zum Beispiel Personalwesen, Vertrieb und Marketing) und Endanwender von Business-Analytics-Lösungen effizienter mit branchenspezi-

---

fischen Lösungen und ergänzenden Serviceleistungen zu bedienen. Auch in Zukunft werden wir unseren Kunden aller Größenordnungen beim Kauf von Software neue Erwerbsmodelle anbieten, um ihnen ihre Budgetplanung zu erleichtern, und unsere Kundenbeziehungen weiter intensivieren. Ein Beispiel hierfür ist SAP Business ByDesign. Hier wollen wir im Verlauf des Jahres 2011 die Zahl unserer Kunden auf der SAP-ByDesign-Plattform von 255 auf 1.000 erhöhen.

#### **Wachstum und Kostensenkungen durch ein offenes Partnernetz**

Durch eine deutlich verstärkte Zusammenarbeit mit Partnern wollen wir unsere Marktabdeckung vergrößern, unser Lösungsportfolio erweitern und die Entwicklung zukunftsweisender Technologien ankurbeln. Dabei werden wir unser Partnernetz und unsere Absatzkanäle als Multiplikator für unser Wachstum und für die Wertschöpfung unserer Kunden nutzen und weiter vergrößern. Hierzu werden wir weiterhin eine führende Rolle bei gemeinsamen Innovationen einnehmen und in allen Segmenten konsequent die verschiedenen Vertriebswege nutzen. Unsere Partner sind in allen Marktsegmenten und Regionen ein attraktiver Absatzkanal für die Produkte und Lösungen der SAP. Den Anteil des indirekten Vertriebs an unserem Softwareumsatz wollen wir 2011 und in den Folgejahren deutlich steigern; bis 2015 soll dieser Anteil auf bis zu 40 % ausgebaut und damit gegenüber 2010 mehr als verdoppelt werden. Unsere Technologiepartner spielen eine zentrale Rolle bei der Umsetzung unserer Strategie: Sie unterstützen uns sowohl bei der Realisierung unserer Forschungsziele und der gewinnbringenden Nutzung der In-Memory-Technologie als auch beim Ausbau unseres Lösungsportfolios.

#### **Organisches Wachstum und gezielte Übernahmen**

Unsere Strategie sieht auch künftig vor allem organisches Wachstum vor. Aus diesem Grund werden wir neben Investitionen in Infrastruktur, Vertrieb und Marketing auch weiter in unsere Produktentwicklung in und technologische Neuerungen investieren. Darüber hinaus erlaubt es unsere Plattformstrategie, das Innovationspotenzial unserer Partner zu nutzen und somit einen noch größeren Mehrwert für unsere Kunden zu schaffen. Zusätzlich sollen gezielte komplementäre und strategische Akquisitionen uns weiter helfen, unsere breiten Lösungsangebote zu ergänzen und strategische Märkte besser abzudecken, um so den Anforderungen unserer Kunden bestmöglich gerecht zu werden.

Um dieses Wachstum erzielen zu können, werden wir 2011 in allen Regionen, einschließlich Deutschland, neue Mitarbeiter einstellen.

#### **Operative Ziele 2011 (Non-IFRS)**

##### **Umsatz- und Ergebnisziele**

2011 modifiziert die SAP ihre Definition für das Betriebsergebnis (Non-IFRS) sowie die operative Marge (Non-IFRS), um diese an die Kennzahlen für die interne Messung des Erfolgs der SAP-Segmente anzupassen (Segmentberichterstattung) und die Vergleichbarkeit mit anderen Softwarefirmen zu erhöhen. Ab 2011 werden Betriebsergebnis (Non-IFRS) und operative Marge (Non-IFRS) um akquisitionsbedingte Aufwendungen, nicht fortgeführte Geschäftstätigkeiten, Abschreibungen auf die abgegrenzten Supporterlöse, aktienorientierte Vergütungsprogramme und Restrukturierungskosten bereinigt. Bisher waren Betriebsergebnis (Non-IFRS) und operative Marge (Non-IFRS) nicht um aktienorientierte Vergütungsprogramme und Restrukturierungskosten bereinigt, darüber hinaus geben wir erstmals für das Geschäftsjahr 2011 einen Ausblick auf die Steuerquote (Non-IFRS).

Der Vorstand gibt aus heutiger Sicht den folgenden Ausblick für 2011:

- SAP erwartet, dass die Software- und softwarebezogenen Serviceerlöse (Non-IFRS) 2011 ohne Berücksichtigung der Wechselkurse um 10 % bis 14 % steigen werden (2010: 9,87 Mrd. €).
- SAP erwartet, dass das Betriebsergebnis (Non-IFRS) 2011 ohne Berücksichtigung der Wechselkurse in einer Spanne von 4,45 Mrd. € bis 4,65 Mrd. € (2010: 4,01 Mrd. €) liegen wird. Dies führt zu einem Anstieg der operativen Marge (Non-IFRS) ohne Berücksichtigung der Wechselkurse um 0,5 bis 1,0 Prozentpunkte (2010: 32,0 %).
- SAP rechnet für das Geschäftsjahr 2011 mit einer effektiven Steuerquote (IFRS) von 27,0 % bis 28,0 % (2010: 22,5 %) und mit einer effektiven Steuerquote (Non-IFRS) von 27,5 % bis 28,5 % (2010: 27,3 %).

Wir erwarten, dass unsere Softwareerlöse schneller wachsen werden als die Software- und softwarebezogenen Serviceerlöse. Hierzu sollen alle Regionen beitragen; allerdings rechnen wir in den Regionen Amerika und APJ mit einem schnelleren Wachstum als in der Region EMEA.

Um den Vergleich von IFRS- und Non-IFRS-Angaben für den Ausblick auf 2011 zu ermöglichen, zeigt die nachfolgende Tabelle eine Überleitungsrechnung. Hierbei werden die IFRS-Kennzahlen Software- und softwarebezogene Serviceerlöse,

Umsatzerlöse, Betriebsergebnis und operative Marge des Jahres 2010 auf die entsprechende und jeweils nächste Non-IFRS-Kennzahl übergeleitet.

| Mio. €, falls nicht anders bezeichnet        | IFRS-Kennzahl | Supporterlöse (gemäß IFRS nicht berichtet) | Operative Aufwendungen <sup>1)</sup> | Veräußerungsaktivitäten <sup>3)</sup> | Non-IFRS-Kennzahl |
|----------------------------------------------|---------------|--------------------------------------------|--------------------------------------|---------------------------------------|-------------------|
| Software- und softwarebezogene Serviceerlöse | 9.794         | 74                                         | N/A                                  | N/A                                   | 9.868             |
| Umsatzerlöse <sup>2)</sup>                   | 12.464        | 74                                         | N/A                                  | N/A                                   | 12.538            |
| Betriebsergebnis <sup>2)</sup>               | 2.591         | 74                                         | 360                                  | 983                                   | 4.007             |
| Operative Marge in %                         | 20,8          | 0,5                                        | 2,9                                  | 7,8                                   | 32,0              |

<sup>1)</sup> Die operativen Aufwendungen beinhalten akquisitionsbedingte Aufwendungen, Aufwendungen für anteilsbasierte Vergütungsprogramme und Restrukturierungsaufwendungen.

<sup>2)</sup> Diese Finanzkennzahlen sind der Zähler oder der Nenner in der Berechnung unserer Non-IFRS-operativen Marge und der entsprechenden IFRS-operativen Marge.

Sie sind zur leichteren Nachvollziehbarkeit ebenfalls in dieser Tabelle dargestellt.

<sup>3)</sup> Unter den Veräußerungsaktivitäten werden die Ergebnisse unserer nicht fortgeführten Geschäftseinheit TomorrowNow erfasst.

### Liquiditäts- und Finanzziele

Wir wollen bis Ende 2011 wieder eine positive Nettoliquidität erreichen. Aus diesem Grund planen wir im Jahr 2011 keine Aktienrückkäufe, außer um anteilsbasierte Vergütungsprogramme zu bedienen. Stattdessen wollen wir vorrangig unsere Schulden verringern. Weitere Emissionen von Schuldtiteln, beispielsweise über die Ausgabe von Anleihen oder Privatplatzierungen in den USA, ziehen wir nur im Fall günstiger Marktbedingungen in Betracht.

### Investitionsziele

Die für das Jahr 2011 geplanten Sachinvestitionen ohne Akquisitionen, die voll aus dem operativen Cashflow gedeckt werden können, umfassen vor allem Computerhardware.

### Dividendenziele

Mit einer Erhöhung der Dividende von 0,50 € auf 0,60 € je Aktie wollen wir auch im Geschäftsjahr 2011 unsere Aktionäre – die Zustimmung der Hauptversammlung vorausgesetzt – am Unternehmenserfolg beteiligen. Damit halten wir an unse-

rem Ziel fest, rund 30 % des Konzernergebnisses in Form von Dividenden an unsere Aktionäre auszuschütten. Die Aufwendungen für den TomorrowNow-Rechtsstreit werden bei der Bemessung der Ausschüttungsquote nicht berücksichtigt.

### Prämissen der Prognosen

Die Prognose beinhaltet alle zum Zeitpunkt der Aufstellung der Bilanz bekannten Ereignisse, die einen Einfluss auf die Geschäftsentwicklung des SAP-Konzerns haben könnten.

Der Ausblick basiert unter anderem auf den dargestellten Prämissen der konjunkturellen Entwicklung sowie darauf, dass wir im Geschäftsjahr 2011 keine positiven Effekte aus einer größeren Akquisition erwarten.



---

### **Ausblick für die SAP AG**

Die SAP AG erzielt ihre Umsatzerlöse in erster Linie aus Lizenzgebühren, die ihre Tochterunternehmen für den Vertrieb von Nutzungsrechten an SAP-Softwarelösungen und deren Wartung an die SAP AG abführen. Die Entwicklung des operativen Geschäfts der SAP AG ist daher eng mit der Entwicklung der Software- und softwarebezogenen Serviceerlöse des SAP-Konzerns verbunden.

Wir erwarten folglich, dass die für 2011 auf SAP-Konzernebene erwartete Steigerung der Software- und softwarebezogenen Serviceerlöse auch auf Ebene der SAP AG zu einem ähnlich positiven Wachstum der Produkterlöse führen wird. Basierend auf der Annahme, dass im Geschäftsjahr 2011 keine Sondereffekte aus Akquisitionen und konzerninternen Umstrukturierungsmaßnahmen eintreten, erwarten wir darüber hinaus einen Anstieg des Betriebsergebnisses. Auch mittelfristig erwarten wir unter Zugrundelegung der für den SAP-Konzern angestrebten Umsatz- und Margenziele, dass sich der Umsatz und das Betriebsergebnis der SAP AG positiv entwickeln werden.

Als Muttergesellschaft des SAP-Konzerns wird die SAP AG auch in Zukunft Beteiligungserträge in Form von Ergebnisübernahmen und Dividendenzahlungen erhalten. Dabei wird erwartet, dass sich die erwartete positive Geschäftsentwicklung im SAP-Konzern ebenfalls positiv auf das Beteiligungsergebnis der SAP AG auswirken wird.

Die im Ausblick zum SAP-Konzern getroffenen Aussagen zu Liquiditäts-, Finanz-, Investitions- und Dividendenzielen gelten gleichermaßen für die SAP AG.

Der Ausblick basiert unter anderem auf den zuvor dargestellten Prämissen der konjunkturellen Entwicklung und Erwartungen in Bezug auf die Geschäftsentwicklung im SAP-Konzern.

### **Mittelfristige Perspektiven**

Mittelfristig erwarten wir unter der Annahme, dass sich die Weltwirtschaft nachhaltig erholt, eine positive Geschäftsentwicklung sowie steigende Umsätze und Ergebnisse. Unsere Strategie zielt darauf ab, die Software- und softwarebezogenen Serviceerlöse und unsere operative Marge zu erhöhen. Hierzu werden wir die Effizienz aller Vertriebsprozesse, der Serviceleistungen, der Supportinfrastruktur und der Forschung und Entwicklung signifikant steigern. Bis Mitte dieses Jahrzehnts streben wir eine operative Marge (Non-IFRS) von 35 % an, wobei wir eine durchschnittliche jährliche Steigerung von bis zu 100 Basispunkten anvisieren. Im selben Zeitraum streben wir eine Umsatzerhöhung auf mindestens 20 Mrd. € an. Um diese Ziele erreichen zu können, planen wir, unsere Organisationsstruktur ganz im Sinne von Wachstum, Innovation und Vereinfachung anzupassen.

Der Markt für Unternehmenssoftware erfährt zurzeit einen tiefgreifenden strukturellen Wandel. Dieser Wandel birgt auch Chancen, die wir dazu nutzen wollen, unseren Kunden die bestmöglichen Geschäftslösungen zu liefern. Dies beinhaltet auch einen zuverlässigen und unkomplizierten Lösungsbetrieb, den wir unter anderem durch den Einsatz neuester technischer Entwicklungen und Betriebsumgebungen ermöglichen. Unser Produktportfolio ist so konzipiert, dass unsere Lösungen in On-Premise- und On-Demand-Umgebungen sowie auf mobilen Endgeräten zur Verfügung stehen. Dabei heben wir uns von unseren Wettbewerbern dadurch ab, dass wir unseren Kunden konsistente Daten und Prozesse gewährleisten, unabhängig davon, in welchem Betriebsmodell sie arbeiten.

Von ihrem zentralen Unternehmenssystem erwarten unsere Kunden Stabilität und geringere Betriebskosten. Daher setzen wir auch künftig verstärkt auf Softwareinnovationen, die anwenderfreundlich sind und unseren Kunden einen größeren Nutzen für ihre Technologieinvestitionen bieten. Auch die Entwicklung modularer Softwarefunktionen, die unsere Kunden zusammen mit ihren bereits vorhandenen Systemen einsetzen können, ist ein Aspekt unserer breit gefächerten Innovationsfähigkeit. In deren Mittelpunkt steht unser Versprechen, echten Mehrwert für unsere Kunden zu erzielen.

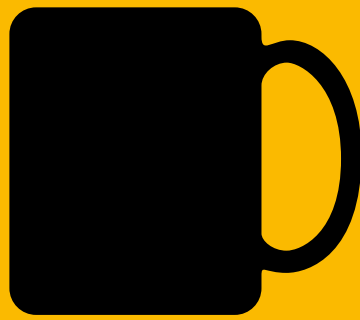

---

**> 50 Mio.**

**LÖSUNGEN FÜR DIE PERSONALWIRTSCHAFT VON SAP HELFEN  
UNTERNEHMEN, FÜR ÜBER 50 MILLIONEN MITARBEITER EIN ATTRAKTIVES  
UND MOTIVIERENDES ARBEITSUMFELD ZU SCHAFFEN.**

## 165 Konzernabschluss

- 166 Konzern-Gewinn- und Verlustrechnung
- 167 Konzerngesamtergebnisrechnung
- 168 Konzernbilanz
- 170 Konzerneigenkapitalveränderungsrechnung
- 171 Konzernkapitalflussrechnung
  
- 172 Konzernanhang für das Geschäftsjahr 2010
  - 172 *Allgemeine Angaben zum Konzernabschluss (1)*
  - 172 *Konsolidierungskreis (2)*
  - 172 *Bilanzierungs- und Bewertungsmethoden (3)*
  - 192 *Unternehmenszusammenschlüsse (4)*
  - 196 *Umsatzerlöse (5)*
  - 196 *Restrukturierung (6)*
  - 197 *Sonstige betriebliche Erträge, netto (7)*
  - 197 *Aufwendungen für Leistungen an Arbeitnehmer und Zahl der Mitarbeiter (8)*
  - 198 *Sonstige Aufwendungen, netto (9)*
  - 199 *Finanzergebnis, netto (10)*
  - 200 *Ertragsteuern (11)*
  - 202 *Ergebnis je Aktie (12)*
  - 203 *Sonstige finanzielle Vermögenswerte (13)*
  - 204 *Forderungen aus Lieferungen und Leistungen und sonstige Forderungen (14)*
  - 206 *Sonstige nicht finanzielle Vermögenswerte (15)*
  - 207 *Geschäfts- oder Firmenwert und immaterielle Vermögenswerte (16)*
  - 210 *Sachanlagen (17)*
  - 211 *Verbindlichkeiten aus Lieferungen und Leistungen und sonstige Verbindlichkeiten, finanzielle Verbindlichkeiten und sonstige nicht finanzielle Verbindlichkeiten (18)*
  - 214 *Rückstellungen (19)*
  - 222 *Passive Rechnungsabgrenzungsposten (20)*
  - 223 *Eigenkapital (21)*
  - 224 *Weitere Angaben zum Kapital (22)*
  - 226 *Sonstige finanzielle Verpflichtungen und Haftungsverhältnisse (23)*
  - 227 *Schwebende Rechtsstreitigkeiten und Schadenersatzansprüche (24)*
  - 230 *Finanzielle Risikofaktoren (25)*
  - 234 *Management finanzieller Risiken (26)*
  - 239 *Angaben zum beizulegenden Zeitwert von Finanzinstrumenten (27)*
  - 243 *Anteilsbasierte Vergütungsprogramme (28)*
  - 254 *Segmentinformationen (29)*
  - 258 *Organe (30)*
  - 262 *Transaktionen mit nahestehenden Unternehmen und Personen (31)*
  - 262 *Honorare und Dienstleistungen des Abschlussprüfers (32)*
  - 263 *Deutscher Corporate Governance Kodex (33)*
  - 263 *Ereignisse nach dem Bilanzstichtag (34)*
  - 264 *Anteilsbesitz (35)*
  
- 273 Bericht des Vorstands zum internen Kontrollsystem für die Finanzberichterstattung im Konzernabschluss

# Konzernabschluss nach IFRS

## Konzern-Gewinn- und Verlustrechnung des SAP-Konzerns für die Geschäftsjahre 2010, 2009 und 2008

| Mio. €, falls nicht anders bezeichnet                                | Textziffer  | 2010          | 2009          | 2008          |
|----------------------------------------------------------------------|-------------|---------------|---------------|---------------|
| Softwareerlöse                                                       |             | 3.265         | 2.607         | 3.606         |
| Supporterlöse                                                        |             | 6.133         | 5.285         | 4.602         |
| Subskriptions- und softwarebezogene Serviceerlöse                    |             | 396           | 306           | 258           |
| <b>Software- und softwarebezogene Serviceerlöse</b>                  |             | <b>9.794</b>  | <b>8.198</b>  | <b>8.466</b>  |
| Beratungserlöse                                                      |             | 2.197         | 2.074         | 2.498         |
| Sonstige Serviceerlöse                                               |             | 473           | 400           | 611           |
| <b>Beratungs- und sonstige Serviceerlöse</b>                         |             | <b>2.670</b>  | <b>2.474</b>  | <b>3.109</b>  |
| <b>Umsatzerlöse</b>                                                  | <b>(5)</b>  | <b>12.464</b> | <b>10.672</b> | <b>11.575</b> |
| Software- und softwarebezogene Servicekosten                         |             | -1.823        | -1.658        | -1.672        |
| Beratungs- und sonstige Servicekosten                                |             | -2.071        | -1.851        | -2.285        |
| Forschungs- und Entwicklungskosten                                   |             | -1.729        | -1.591        | -1.627        |
| Vertriebs- und Marketingkosten                                       |             | -2.645        | -2.199        | -2.546        |
| Allgemeine Verwaltungskosten                                         |             | -636          | -564          | -624          |
| Restrukturisierungskosten                                            | (6)         | 3             | -198          | -60           |
| TomorrowNow-Rechtsstreit                                             | (24)        | -981          | -56           | -71           |
| Sonstige betriebliche Erträge, netto                                 | (7)         | 9             | 33            | 11            |
| <b>Operative Aufwendungen</b>                                        | <b>(8)</b>  | <b>-9.873</b> | <b>-8.084</b> | <b>-8.874</b> |
| <b>Betriebsergebnis</b>                                              |             | <b>2.591</b>  | <b>2.588</b>  | <b>2.701</b>  |
| <b>Sonstige Aufwendungen, netto</b>                                  | <b>(9)</b>  | <b>-186</b>   | <b>-73</b>    | <b>-27</b>    |
| Finanzierungserträge                                                 |             | 73            | 37            | 98            |
| Finanzierungsaufwendungen TomorrowNow-Rechtsstreit                   | (24)        | -12           | 0             | 0             |
| Sonstige Finanzierungsaufwendungen                                   |             | -128          | -117          | -148          |
| Finanzierungsaufwendungen                                            |             | -140          | -117          | -148          |
| <b>Finanzergebnis, netto</b>                                         | <b>(10)</b> | <b>-67</b>    | <b>-80</b>    | <b>-50</b>    |
| <b>Gewinn vor Steuern</b>                                            |             | <b>2.338</b>  | <b>2.435</b>  | <b>2.624</b>  |
| Ertragsteueraufwand TomorrowNow-Rechtsstreit                         |             | 377           | 20            | 26            |
| Sonstiger Ertragsteueraufwand                                        |             | -902          | -705          | -802          |
| Ertragsteueraufwand                                                  | (11)        | -525          | -685          | -776          |
| <b>Gewinn nach Steuern</b>                                           |             | <b>1.813</b>  | <b>1.750</b>  | <b>1.848</b>  |
| - Gewinn, der den nicht beherrschenden Anteilen zuzurechnen ist      |             | 2             | 2             | 1             |
| - Gewinn, der den Eigentümern des Mutterunternehmens zuzurechnen ist |             | 1.811         | 1.748         | 1.847         |
| <b>Unverwässertes Ergebnis je Aktie, in €</b>                        | <b>(12)</b> | <b>1,52</b>   | <b>1,47</b>   | <b>1,55</b>   |
| <b>Verwässertes Ergebnis je Aktie, in €</b>                          | <b>(12)</b> | <b>1,52</b>   | <b>1,47</b>   | <b>1,55</b>   |

Der nachfolgende Konzernanhang ist integraler Bestandteil des Konzernabschlusses.

## Konzerngesamtergebnisrechnung des SAP-Konzerns für die Geschäftsjahre 2010, 2009 und 2008

| Mio. €                                                                                                          | Textziffer  | 2010         | 2009         | 2008         |
|-----------------------------------------------------------------------------------------------------------------|-------------|--------------|--------------|--------------|
| <b>Gewinn nach Steuern</b>                                                                                      |             | <b>1.813</b> | <b>1.750</b> | <b>1.848</b> |
| Gewinne/Verluste aus Umrechnungsdifferenzen aus der Währungsumrechnung, vor Steuern                             |             | 193          | 76           | -63          |
| Umgliederungsbeträge für Umrechnungsdifferenzen aus der Währungsumrechnung, vor Steuern                         |             | 0            | -2           | 0            |
| <b>Umrechnungsdifferenzen aus der Währungsumrechnung</b>                                                        |             | <b>193</b>   | <b>74</b>    | <b>-63</b>   |
| Gewinne/Verluste aus der Neubewertung von zur Veräußerung verfügbaren finanziellen Vermögenswerten, vor Steuern | (27)        | 5            | 15           | 1            |
| Umgliederungsbeträge für zur Veräußerung verfügbare Vermögenswerte, vor Steuern                                 | (27)        | -2           | 0            | -3           |
| <b>Zur Veräußerung verfügbare finanzielle Vermögenswerte</b>                                                    | <b>(27)</b> | <b>3</b>     | <b>15</b>    | <b>-2</b>    |
| Gewinne/Verluste aus Absicherungen von Zahlungsströmen, vor Steuern                                             | (26)        | -88          | -41          | -15          |
| Umgliederungsbeträge für die Absicherung von Zahlungsströmen, vor Steuern                                       | (26)        | 67           | 84           | -55          |
| <b>Absicherungen von Zahlungsströmen</b>                                                                        | <b>(26)</b> | <b>-21</b>   | <b>43</b>    | <b>-70</b>   |
| <b>Versicherungsmathematische Gewinne (Verluste) aus leistungsorientierten Plänen, vor Steuern</b>              | <b>(19)</b> | <b>-39</b>   | <b>-6</b>    | <b>-54</b>   |
| <b>Sonstiges Ergebnis vor Steuern</b>                                                                           |             | <b>136</b>   | <b>126</b>   | <b>-189</b>  |
| Ertragsteuern in Zusammenhang mit Bestandteilen des sonstigen Ergebnisses                                       | (11)        | 18           | -12          | 39           |
| <b>Sonstiges Ergebnis nach Steuern</b>                                                                          |             | <b>154</b>   | <b>114</b>   | <b>-150</b>  |
| <b>Gesamtergebnis</b>                                                                                           |             | <b>1.967</b> | <b>1.864</b> | <b>1.698</b> |
| Ergebnis, das den nicht beherrschenden Anteilen zuzurechnen ist                                                 |             | 2            | 2            | 1            |
| Ergebnis, das den Eigentümern des Mutterunternehmens zuzurechnen ist                                            |             | 1.965        | 1.862        | 1.697        |

Der nachfolgende Konzernanhang ist integraler Bestandteil des Konzernabschlusses.

Konzernbilanz des SAP-Konzerns zum 31. Dezember des jeweiligen Geschäftsjahres

| Mio. €                                                                     | Textziffer  | 2010          | 2009          |
|----------------------------------------------------------------------------|-------------|---------------|---------------|
| <b>Zahlungsmittel und Zahlungsmitteläquivalente</b>                        |             | <b>3.518</b>  | <b>1.884</b>  |
| <b>Sonstige finanzielle Vermögenswerte</b>                                 | <b>(13)</b> | <b>158</b>    | <b>486</b>    |
| <b>Forderungen aus Lieferungen und Leistungen und sonstige Forderungen</b> | <b>(14)</b> | <b>3.099</b>  | <b>2.546</b>  |
| <b>Sonstige nicht finanzielle Vermögenswerte</b>                           | <b>(15)</b> | <b>181</b>    | <b>147</b>    |
| <b>Tatsächliche Steuererstattungsansprüche</b>                             | <b>(11)</b> | <b>187</b>    | <b>192</b>    |
| <b>Summe kurzfristiger Vermögenswerte</b>                                  |             | <b>7.143</b>  | <b>5.255</b>  |
| <b>Geschäfts- oder Firmenwert</b>                                          | <b>(16)</b> | <b>8.431</b>  | <b>4.994</b>  |
| <b>Immaterielle Vermögenswerte</b>                                         | <b>(16)</b> | <b>2.376</b>  | <b>894</b>    |
| <b>Sachanlagen</b>                                                         | <b>(17)</b> | <b>1.449</b>  | <b>1.371</b>  |
| <b>Sonstige finanzielle Vermögenswerte</b>                                 | <b>(13)</b> | <b>475</b>    | <b>284</b>    |
| <b>Forderungen aus Lieferungen und Leistungen und sonstige Forderungen</b> | <b>(14)</b> | <b>78</b>     | <b>52</b>     |
| <b>Sonstige nicht finanzielle Vermögenswerte</b>                           | <b>(15)</b> | <b>31</b>     | <b>35</b>     |
| <b>Tatsächliche Steuererstattungsansprüche</b>                             | <b>(11)</b> | <b>122</b>    | <b>91</b>     |
| <b>Latente Steueransprüche</b>                                             | <b>(11)</b> | <b>736</b>    | <b>398</b>    |
| <b>Summe langfristiger Vermögenswerte</b>                                  |             | <b>13.698</b> | <b>8.119</b>  |
| <b>Summe Vermögenswerte</b>                                                |             | <b>20.841</b> | <b>13.374</b> |

Der nachfolgende Konzernanhang ist integraler Bestandteil des Konzernabschlusses.

| Mio. €                                                                          | Textziffer  | 2010          | 2009          |
|---------------------------------------------------------------------------------|-------------|---------------|---------------|
| Verbindlichkeiten aus Lieferungen und Leistungen und sonstige Verbindlichkeiten | (18)        | 922           | 638           |
| Tatsächliche Steuerschulden                                                     | (11)        | 164           | 125           |
| Finanzielle Verbindlichkeiten                                                   | (18)        | 142           | 146           |
| Sonstige nicht finanzielle Verbindlichkeiten                                    | (18)        | 1.726         | 1.577         |
| Rückstellung für Prozessrisiken TomorrowNow                                     | (24)        | 997           | 93            |
| Sonstige Rückstellungen                                                         |             | 287           | 239           |
| Rückstellungen                                                                  | (19)        | 1.284         | 332           |
| Passive Rechnungsabgrenzung                                                     | (20)        | 911           | 598           |
| <b>Summe kurzfristiger Schulden</b>                                             |             | <b>5.149</b>  | <b>3.416</b>  |
| Verbindlichkeiten aus Lieferungen und Leistungen und sonstige Verbindlichkeiten | (18)        | 30            | 35            |
| Tatsächliche Steuerschulden                                                     | (11)        | 371           | 239           |
| Finanzielle Verbindlichkeiten                                                   | (18)        | 4.449         | 729           |
| Sonstige nicht finanzielle Verbindlichkeiten                                    | (18)        | 85            | 12            |
| Rückstellungen                                                                  | (19)        | 292           | 198           |
| Latente Steuerschulden                                                          | (11)        | 578           | 190           |
| Passive Rechnungsabgrenzung                                                     | (20)        | 63            | 64            |
| <b>Summe langfristiger Schulden</b>                                             |             | <b>5.868</b>  | <b>1.467</b>  |
| <b>Summe Schulden</b>                                                           |             | <b>11.017</b> | <b>4.883</b>  |
| Gezeichnetes Kapital                                                            |             | 1.227         | 1.226         |
| Agien                                                                           |             | 337           | 317           |
| Gewinnrücklagen                                                                 |             | 9.767         | 8.571         |
| Sonstige Eigenkapitalbestandteile                                               |             | -142          | -317          |
| Eigene Anteile                                                                  |             | -1.382        | -1.320        |
| <b>Eigenkapital, das den Eigentümern des Mutterunternehmens zuzurechnen ist</b> |             | <b>9.807</b>  | <b>8.477</b>  |
| <b>Nicht beherrschende Anteile</b>                                              |             | <b>17</b>     | <b>14</b>     |
| <b>Summe des Eigenkapitals</b>                                                  | <b>(21)</b> | <b>9.824</b>  | <b>8.491</b>  |
| <b>Summe Eigenkapital und Schulden</b>                                          |             | <b>20.841</b> | <b>13.374</b> |

Der nachfolgende Konzernanhang ist integraler Bestandteil des Konzernabschlusses.

# Konzerneigenkapitalveränderungsrechnung des SAP-Konzerns für die Geschäftsjahre 2010, 2009 und 2008

| Mio. €                                                             | Gezeichnetes Kapital | Agien      | Gewinnrücklagen | Sonstige Eigenkapitalbestandteile |                                                       |                                   | Eigene Aktien | Eigenkapital, das den Eigentümern des Mutterunternehmens zuzuordnen ist | Nicht beherrschende Anteile | Summe des Eigenkapitals |
|--------------------------------------------------------------------|----------------------|------------|-----------------|-----------------------------------|-------------------------------------------------------|-----------------------------------|---------------|-------------------------------------------------------------------------|-----------------------------|-------------------------|
|                                                                    |                      |            |                 | Währungs-umrechnungs-differenzen  | Zur Veräußerung verfügbare finanzielle Vermögenswerte | Absicherungen von Zahlungsströmen |               |                                                                         |                             |                         |
| <b>1. Januar 2008</b>                                              | <b>1.246</b>         | <b>347</b> | <b>6.925</b>    | <b>-330</b>                       | <b>1</b>                                              | <b>10</b>                         | <b>-1.734</b> | <b>6.465</b>                                                            | <b>1</b>                    | <b>6.466</b>            |
| Gewinn nach Steuern                                                |                      |            | 1.847           |                                   |                                                       |                                   |               | 1.847                                                                   | 1                           | 1.848                   |
| Sonstiges Ergebnis nach Steuern                                    |                      |            | -32             | -63                               | -2                                                    | -53                               |               | -150                                                                    |                             | -150                    |
| Gezahlte Dividenden                                                |                      |            | -594            |                                   |                                                       |                                   |               | -594                                                                    |                             | -594                    |
| Ausgabe neuer Aktien unter anteilsbasierten Vergütungsprogrammen   | 1                    | 12         |                 |                                   |                                                       |                                   |               | 13                                                                      |                             | 13                      |
| Erwerb eigener Aktien                                              |                      |            |                 |                                   |                                                       |                                   | -487          | -487                                                                    |                             | -487                    |
| Einziehung eigener Aktien                                          | -21                  |            | -723            |                                   |                                                       |                                   | 744           |                                                                         |                             |                         |
| Ausgabe eigener Aktien unter anteilsbasierten Vergütungsprogrammen |                      | -39        |                 |                                   |                                                       |                                   | 115           | 76                                                                      |                             | 76                      |
| Übrige Veränderungen                                               |                      |            | -1              |                                   |                                                       |                                   |               | -1                                                                      |                             | -1                      |
| <b>31. Dezember 2008</b>                                           | <b>1.226</b>         | <b>320</b> | <b>7.422</b>    | <b>-393</b>                       | <b>-1</b>                                             | <b>-43</b>                        | <b>-1.362</b> | <b>7.169</b>                                                            | <b>2</b>                    | <b>7.171</b>            |
| Gewinn nach Steuern                                                |                      |            | 1.748           |                                   |                                                       |                                   |               | 1.748                                                                   | 2                           | 1.750                   |
| Sonstiges Ergebnis nach Steuern                                    |                      |            | -6              | 74                                | 14                                                    | 32                                |               | 114                                                                     |                             | 114                     |
| Gezahlte Dividenden                                                |                      |            | -594            |                                   |                                                       |                                   |               | -594                                                                    |                             | -594                    |
| Ausgabe neuer Aktien unter anteilsbasierten Vergütungsprogrammen   |                      | 5          |                 |                                   |                                                       |                                   |               | 5                                                                       |                             | 5                       |
| Ausgabe eigener Aktien unter anteilsbasierten Vergütungsprogrammen |                      | -8         |                 |                                   |                                                       |                                   | 42            | 34                                                                      |                             | 34                      |
| Zugang von nicht beherrschenden Anteilen                           |                      |            |                 |                                   |                                                       |                                   |               |                                                                         | 10                          | 10                      |
| Übrige Veränderungen                                               |                      |            | 1               |                                   |                                                       |                                   |               | 1                                                                       |                             | 1                       |
| <b>31. Dezember 2009</b>                                           | <b>1.226</b>         | <b>317</b> | <b>8.571</b>    | <b>-319</b>                       | <b>13</b>                                             | <b>-11</b>                        | <b>-1.320</b> | <b>8.477</b>                                                            | <b>14</b>                   | <b>8.491</b>            |
| Gewinn nach Steuern                                                |                      |            | 1.811           |                                   |                                                       |                                   |               | 1.811                                                                   | 2                           | 1.813                   |
| Sonstiges Ergebnis nach Steuern                                    |                      |            | -21             | 188                               | 3                                                     | -16                               |               | 154                                                                     |                             | 154                     |
| Gezahlte Dividenden                                                |                      |            | -594            |                                   |                                                       |                                   |               | -594                                                                    |                             | -594                    |
| Ausgabe neuer Aktien unter anteilsbasierten Vergütungsprogrammen   | 1                    | 23         |                 |                                   |                                                       |                                   |               | 24                                                                      |                             | 24                      |
| Erwerb eigener Aktien                                              |                      |            |                 |                                   |                                                       |                                   | -220          | -220                                                                    |                             | -220                    |
| Ausgabe eigener Aktien unter anteilsbasierten Vergütungsprogrammen |                      | -3         |                 |                                   |                                                       |                                   | 158           | 155                                                                     |                             | 155                     |
| Übrige Veränderungen                                               |                      |            |                 |                                   |                                                       |                                   |               |                                                                         | 1                           | 1                       |
| <b>31. Dezember 2010</b>                                           | <b>1.227</b>         | <b>337</b> | <b>9.767</b>    | <b>-131</b>                       | <b>16</b>                                             | <b>-27</b>                        | <b>-1.382</b> | <b>9.807</b>                                                            | <b>17</b>                   | <b>9.824</b>            |

Der nachfolgende Konzernanhang ist integraler Bestandteil des Konzernabschlusses.



## Konzernkapitalflussrechnung des SAP-Konzerns für die Geschäftsjahre 2010, 2009 und 2008

| Mio. €                                                                                                                  | Textziffer  | 2010          | 2009          | 2008          |
|-------------------------------------------------------------------------------------------------------------------------|-------------|---------------|---------------|---------------|
| <b>Gewinn nach Steuern</b>                                                                                              |             | <b>1.813</b>  | <b>1.750</b>  | <b>1.848</b>  |
| Anpassungen bei der Überleitung vom Gewinn nach Steuern                                                                 |             |               |               |               |
| Abschreibungen auf immaterielle Vermögenswerte und Sachanlagen                                                          |             | 534           | 499           | 539           |
| Ertragsteueraufwand                                                                                                     | (11)        | 525           | 685           | 776           |
| Finanzergebnis, netto                                                                                                   | (10)        | 67            | 80            | 50            |
| Gewinne/Verluste aus der Veräußerung von langfristigen Vermögenswerten                                                  | (7)         | -3            | -11           | 11            |
| Erhöhung/Minderung der Wertberichtigungen auf Forderungen aus Lieferungen und Leistungen                                |             | -49           | 64            | 76            |
| Andere Anpassungen für zahlungsunwirksame Posten                                                                        |             | 32            | 14            | 52            |
| Erhöhung/Minderung der Forderungen aus Lieferungen und Leistungen                                                       |             | -123          | 593           | -48           |
| Erhöhung/Minderung sonstiger Vermögenswerte                                                                             |             | -112          | 205           | -12           |
| Erhöhung/Minderung von Verbindlichkeiten aus Lieferungen und Leistungen, Rückstellungen und sonstigen Verbindlichkeiten |             | 1.116         | -124          | -267          |
| Erhöhung/Minderung des passiven Rechnungsabgrenzungspostens                                                             |             | 66            | 48            | 61            |
| Cashoutflows in Zusammenhang mit dem Rechtsstreit TomorrowNow                                                           | (24)        | -102          | -19           | -13           |
| Gezahlte Zinsen                                                                                                         |             | -66           | -69           | -105          |
| Erhaltene Zinsen                                                                                                        |             | 52            | 22            | 72            |
| Gezahlte Ertragsteuern, abzüglich zurückerstatteter Beträge                                                             |             | -818          | -722          | -882          |
| <b>Cashflows aus der betrieblichen Tätigkeit</b>                                                                        |             | <b>2.932</b>  | <b>3.015</b>  | <b>2.158</b>  |
| Erwerb konsolidierter Unternehmen abzüglich übernommener Zahlungsmittel und Zahlungsmitteläquivalente                   | (4)         | -4.194        | -73           | -3.773        |
| Ablösung von Verbindlichkeiten im Zuge von Unternehmenserwerben                                                         |             | 0             | 0             | -450          |
| Auszahlungen aus dem Erwerb von immateriellen Vermögenswerten und Sachanlagen                                           |             | -334          | -225          | -339          |
| Einzahlungen aus dem Verkauf von immateriellen Vermögenswerten und Sachanlagen                                          |             | 44            | 45            | 44            |
| Auszahlungen aus dem Zugang von verfügbungsbeschränkten Zahlungsmitteln                                                 |             | 0             | 0             | -448          |
| Einzahlungen aus dem Abgang von verfügbungsbeschränkten Zahlungsmitteln                                                 |             | 0             | 0             | 1.001         |
| Auszahlungen für den Erwerb von Eigenkapital- oder Schuldinstrumenten anderer Unternehmen                               |             | -842          | -1.073        | -396          |
| Einzahlungen für den Erwerb von Eigenkapital- oder Schuldinstrumenten anderer Unternehmen                               |             | 1.332         | 1.027         | 595           |
| <b>Cashflows aus Investitionstätigkeiten</b>                                                                            |             | <b>-3.994</b> | <b>-299</b>   | <b>-3.766</b> |
| Gezahlte Dividenden                                                                                                     | (22)        | -594          | -594          | -594          |
| Auszahlungen zum Erwerb oder Rückkauf von eigenen Anteilen                                                              | (22)        | -220          | 0             | -487          |
| Einzahlungen aus der Ausgabe von eigenen Anteilen                                                                       |             | 127           | 24            | 85            |
| Einzahlungen aus der Ausgabe von neuen Anteilen (anteilsbasierte Vergütungen)                                           |             | 23            | 6             | 20            |
| Einzahlungen aus Fremdkapitalaufnahmen                                                                                  |             | 5.380         | 697           | 3.859         |
| Rückzahlungen der Fremdkapitalaufnahmen                                                                                 |             | -2.196        | -2.303        | -1.571        |
| Erwerb von derivativen Eigenkapitalinstrumenten                                                                         |             | -14           | 0             | -55           |
| Einzahlungen aus der Ausübung derivativer Eigenkapitalinstrumente                                                       |             | 4             | 4             | 24            |
| <b>Cashflows aus Finanzierungstätigkeiten</b>                                                                           |             | <b>2.510</b>  | <b>-2.166</b> | <b>1.281</b>  |
| <b>Auswirkungen von Wechselkursänderungen auf Zahlungsmittel und Zahlungsmitteläquivalente</b>                          |             | <b>186</b>    | <b>54</b>     | <b>-1</b>     |
| <b>Nettoerhöhung/-verringerung der Zahlungsmittel und Zahlungsmitteläquivalente</b>                                     |             | <b>1.634</b>  | <b>604</b>    | <b>-328</b>   |
| <b>Zahlungsmittel und Zahlungsmitteläquivalente zu Beginn der Periode</b>                                               | <b>(22)</b> | <b>1.884</b>  | <b>1.280</b>  | <b>1.608</b>  |
| <b>Zahlungsmittel und Zahlungsmitteläquivalente am Ende der Periode</b>                                                 | <b>(22)</b> | <b>3.518</b>  | <b>1.884</b>  | <b>1.280</b>  |

Der nachfolgende Konzernanhang ist integraler Bestandteil des Konzernabschlusses.

## KONZERNANHANG FÜR DAS GESCHÄFTSJAHR 2010

### (1) Allgemeine Angaben zum Konzernabschluss

Der vorliegende Konzernabschluss der SAP AG und ihrer Tochterunternehmen (zusammen „wir“, „unser(e)“, „SAP“, „der Konzern“ oder „das Unternehmen“) wurde nach den Vorschriften der International Financial Reporting Standards (IFRS) aufgestellt. Die Bezeichnung „IFRS“ umfasst alle vom International Accounting Standards Board (IASB) veröffentlichten Standards sowie die diesbezüglichen Interpretationen des International Financial Reporting Interpretations Committee (IFRIC).

Wir haben alle Standards und Interpretationen angewendet, die zum 31. Dezember 2010 gültig und von der Europäischen Union (EU) übernommen waren. Für unseren Konzernabschluss waren zum 31. Dezember 2010, 2009 und 2008 keine Standards oder Interpretationen relevant, die zwar in Kraft getreten, jedoch noch nicht in europäisches Recht übernommen waren. Unser Konzernabschluss entspricht daher sowohl den vom IASB veröffentlichten IFRS als auch den IFRS, wie sie in der EU anzuwenden sind.

Der Vorstand der SAP hat den Konzernabschluss am 3. März 2011 zur Weitergabe an den Aufsichtsrat freigegeben.

Alle Beträge im Konzernabschluss werden – sofern im Einzelfall nicht anders vermerkt – in Millionen Euro (Mio. €) angegeben. Aufgrund von Rundungen können sich im vorliegenden Bericht bei Summenbildungen und bei der Berechnung von Prozentangaben geringfügige Abweichungen ergeben.

### (2) Konsolidierungskreis

Zum Kreis der voll konsolidierten Unternehmen gehören neben der SAP AG alle Unternehmen, die von der SAP AG unmittelbar oder mittelbar beherrscht werden.

Alle Unternehmen des SAP-Konzerns erstellen ihren Jahresabschluss zum 31. Dezember. Für alle Jahresabschlüsse in den entsprechenden Berichtsperioden wurden dieselben konzernweiten Bilanzierungs- und Bewertungsmethoden in Übereinstimmung mit den IFRS angewendet. Die Auswirkungen konzerninterner Geschäftsvorfälle wurden eliminiert.

Die Änderungen des Konsolidierungskreises sind in der folgenden Tabelle dargestellt.

### Voll konsolidierte Tochterunternehmen

|                          | Inland    | Ausland    | Gesamt     |
|--------------------------|-----------|------------|------------|
| 31. Dezember 2008        | 22        | 165        | 187        |
| Zugänge                  | 1         | 11         | 12         |
| Abgänge                  | -4        | -32        | -36        |
| <b>31. Dezember 2009</b> | <b>19</b> | <b>144</b> | <b>163</b> |
| Zugänge                  | 4         | 58         | 62         |
| Abgänge                  | -2        | -20        | -22        |
| <b>31. Dezember 2010</b> | <b>21</b> | <b>182</b> | <b>203</b> |

Die Zugänge ergeben sich aus unseren Unternehmenszusammenschlüssen sowie Unternehmensgründungen. Die Abgänge resultieren aus dem Zusammenschluss und der Liquidation konsolidierter sowie erworbener Unternehmen.

Die Veränderung des Konsolidierungskreises im Geschäftsjahr 2010 wirkt sich auf die Vergleichbarkeit mit den Konzernabschlüssen für die Geschäftsjahre 2009 und 2008 aus. Im Jahr 2010 haben wir Sybase Inc. erworben. Dieser Erwerb wirkt sich auf einige Posten im Konzernabschluss der SAP aus und könnte die Vergleichbarkeit mit unseren Konzernabschlüssen für die Geschäftsjahre 2009 und 2008 beeinträchtigen. Weitere Erläuterungen zu unseren Unternehmenszusammenschlüssen und deren Effekt auf unseren Konzernabschluss sind Textziffer (4) zu entnehmen.

### (3) Bilanzierungs- und Bewertungsmethoden

#### (3a) Grundlagen der Bewertung

Der Konzernabschluss wurde bis auf folgende Ausnahmen auf der Grundlage historischer Anschaffungs- oder Herstellungskosten aufgestellt:

- Derivative Finanzinstrumente sowie zur Veräußerung verfügbare finanzielle Vermögenswerte (außer Finanzinvestitionen in bestimmte Eigenkapitalinstrumente ohne notierten Marktpreis) und Verbindlichkeiten für anteilsbasierte Vergütungsprogramme mit Barausgleich werden zum beizulegenden Zeitwert bewertet.

- Forderungen und Verbindlichkeiten in Fremdwährungen werden zu den geltenden Wechselkursen am Bilanzstichtag umgerechnet.
- Pensionen werden – wie in Textziffer (19a) erläutert – gemäß IAS 19 Leistungen an Arbeitnehmer (IAS 19) bewertet.

Angaben zu den Methoden und Annahmen, die wir bei der Ermittlung der jeweiligen Bewertungsgrundlagen und beizulegenden Zeitwerte anwenden, sind gegebenenfalls im Anhang in den Erläuterungen zu dem jeweiligen Vermögenswert oder der Verbindlichkeit zu finden.

### **(3b) Angewandte Bilanzierungs- und Bewertungsmethoden**

#### **Umgliederungen**

Wir haben bestimmte Erlösposten in unserem Konzernabschluss umgegliedert und umbenannt. Als Folge des Erwerbs von Sybase erzielt die SAP Umsatzerlöse aus Messaging-Services. Diese Erlöse sind in den sonstigen Serviceerlösen unter den Beratungs- und sonstigen Serviceerlösen ausgewiesen. Darüber hinaus haben wir die zuvor separat ausgewiesenen Schulungserlöse (2009: 273 Mio. €; 2008: 434 Mio. €) und sonstigen Erlöse (2009: 42 Mio. €; 2008: 70 Mio. €) in die sonstigen Serviceerlöse umgegliedert. Diese Anpassung trägt dazu bei, unsere Gewinn- und Verlustrechnung weiterhin übersichtlich zu halten. Die Vorjahreszahlen wurden an die neue Darstellung angepasst.

Gezahlte und erhaltene Zinsen sowie gezahlte Ertragsteuern, abzüglich zurückerstatteter Beträge, werden als separate Posten in unserer Konzernkapitalflussrechnung ausgewiesen. Zuvor hatten wir diese Informationen in Form einer Fußnote zur Konzernkapitalflussrechnung angegeben. Diese Änderungen hatten einige Umgliederungen innerhalb der Cashflows aus der betrieblichen Tätigkeit zur Folge.

Weiterhin weisen wir die Effekte aus dem TomorrowNow-Rechtsstreit in unserem Konzernabschluss separat aus, da wir die Rückstellung für den Rechtsstreit nach dem Jury-Entscheid im November 2010 wesentlich erhöht haben. Weitere Ausführungen finden sich in Textziffer (19b) und (24). Wir glauben, dass eine separate Darstellung für das Verständnis unserer Vermögens-, Finanz- und Ertragslage relevant ist. Vor dieser Umgliederung

wurden die entsprechenden Aufwendungen in unserer Konzern-Gewinn- und Verlustrechnung unter Software- und softwarebezogenen Servicekosten ausgewiesen. Die Rückstellung für TomorrowNow wurde bisher in unserem Konzernabschluss unter den sonstigen Rückstellungen ausgewiesen. Der zum 31. Dezember 2008 gebuchte Betrag war nicht wesentlich.

Darüber hinaus haben wir die Darstellung des Finanzergebnisses, netto geändert. Bislang separat gezeigte sonstige finanzielle Erträge/Aufwendungen, netto wurden aufgespalten und sonstige finanzielle Erträge werden jetzt in den Finanzierungserträgen ausgewiesen während sonstige finanzielle Aufwendungen in den Finanzierungsaufwendungen gezeigt werden. Wir glauben, dass diese geänderte Darstellung für das Verständnis, aus welchen Instrumenten diese Erträge und Aufwendungen stammen, von Vorteil ist.

#### **Unternehmenszusammenschlüsse und Geschäfts- oder Firmenwerte**

Seit dem 1. Januar 2009 wenden wir für die Bilanzierung von Unternehmenszusammenschlüssen IFRS 3 Unternehmenszusammenschlüsse (2008) an. Für Schätzungsänderungen, vor allem Schätzungen für bedingte Kaufpreiszahlungen von Unternehmenszusammenschlüssen vor dem 1. Januar 2009, gelten weiterhin die vorherigen Regeln. Unternehmenszusammenschlüsse bilanzieren wir nach der Erwerbsmethode. Die Anschaffungskosten des Erwerbs bewerten wir mit dem beizulegenden Zeitwert der übertragenen Vermögenswerte und entstandenen Schulden zum Tauschzeitpunkt. Für jeden Unternehmenszusammenschluss bewertet der Erwerber den nicht beherrschenden Anteil am erworbenen Unternehmen mit dem beizulegenden Zeitwert oder mit dem entsprechenden Anteil des identifizierbaren Nettovermögens des erworbenen Unternehmens. Angefallene Erwerbsnebenkosten erfassen wir als Aufwand in den allgemeinen Verwaltungskosten.

Die Differenz zwischen Anschaffungskosten und beizulegendem Zeitwert des Anteils der Gesellschaft an den erworbenen identifizierbaren Nettovermögenswerten haben wir als Geschäfts- oder Firmenwert angesetzt.

Bei assoziierten Unternehmen ist ein Geschäfts- oder Firmenwert im Buchwert der At-equity-Beteiligung enthalten.

## Währungsumrechnung

Vermögenswerte und Schulden unserer ausländischen Tochterunternehmen, deren funktionale Währung nicht der Euro ist, rechnen wir zu den am Bilanzstichtag geltenden Wechselkursen um. Die Aufwendungen und Erträge rechnen wir zu Durchschnittskursen um, die jeweils auf monatlicher Basis ermittelt werden. Aus der Währungsumrechnung resultierende Unterschiedsbeträge werden als sonstige Eigenkapitalbestandteile erfasst. Währungseffekte aus langfristig angelegten Fremdwährungstransaktionen werden ebenfalls als sonstige Eigenkapitalbestandteile erfasst. Bei Abgang, Liquidation oder Aufgabe eines ausländischen Geschäftsbetriebs werden die jeweiligen kumulativen Unterschiede aus der Währungsumrechnung von den sonstigen Eigenkapitalbestandteilen in die Gewinn- und Verlustrechnung umklassifiziert.

Transaktionen in Fremdwährungen rechnen wir zu den am Tag der Transaktion gültigen Wechselkursen in die entsprechenden funktionalen Währungen unserer Tochterunternehmen um. Monetäre Vermögenswerte und Verbindlichkeiten in Fremdwährungen werden zum Stichtagskurs bewertet. Die sich daraus ergebenden Währungseffekte werden innerhalb der sonstigen Aufwendungen, netto, in der Konzern-Gewinn- und Verlustrechnung erfasst.

Die Mittelzu- beziehungsweise -abflüsse aus der betrieblichen Tätigkeit rechnen wir zu Durchschnittskursen um, die jeweils auf monatlicher Basis ermittelt werden. Den Mittelzu- beziehungsweise -abfluss aus Investitionstätigkeit und aus Finanzierungstätigkeit rechnen wir zum tatsächlichen Wechselkurs zum Zeitpunkt der jeweiligen Transaktion um. Die durch Währungsschwankungen bedingten zahlungsmittelwirksamen Effekte werden in der Konzernkapitalflussrechnung separat ausgewiesen.

Geschäfts- oder Firmenwerte, die im Zusammenhang mit dem Erwerb eines ausländischen Geschäftsbetriebs entstehen, sowie jegliche Anpassungen der Buchwerte der Vermögenswerte und Schulden, die aus dem Erwerb dieses ausländischen Geschäftsbetriebs stammen, an ihren jeweiligen beizulegenden Zeitwert werden als Vermögenswerte und Schulden des ausländischen Geschäftsbetriebs behandelt und zum Stichtagskurs umgerechnet.

Die Wechselkurse der für den Konzernabschluss wesentlichen Währungen haben sich wie folgt verändert:

## Wechselkurse

| Gegenwert von 1 €    |     | Mittelkurs am Bilanzstichtag |            |        | Jahresdurchschnittskurs |        |
|----------------------|-----|------------------------------|------------|--------|-------------------------|--------|
|                      |     | 31.12.2010                   | 31.12.2009 | 2010   | 2009                    | 2008   |
| US-Dollar            | USD | 1,3362                       | 1,4406     | 1,3201 | 1,3962                  | 1,4662 |
| Britisches Pfund     | GBP | 0,8608                       | 0,8881     | 0,8570 | 0,8901                  | 0,8016 |
| Japanischer Yen      | JPY | 108,65                       | 133,16     | 115,07 | 130,66                  | 148,88 |
| Schweizer Franken    | CHF | 1,2504                       | 1,4836     | 1,3699 | 1,5097                  | 1,5786 |
| Kanadischer Dollar   | CAD | 1,3322                       | 1,5128     | 1,3583 | 1,5832                  | 1,5486 |
| Australischer Dollar | AUD | 1,3136                       | 1,6008     | 1,4198 | 1,7394                  | 1,7724 |

---

## Umsatzrealisierung

Unsere Umsatzerlöse stammen aus dem Vertrieb von Softwarelizenzen sowie aus Support-, Subskriptions-, Beratungs-, Entwicklungs-, Schulungs- und sonstigen Serviceleistungen. Der überwiegende Teil unserer Softwareverkäufe erfolgt in Kombination mit Support- und sonstigen Serviceleistungen.

Die in der Konzern-Gewinn- und Verlustrechnung abgebildeten Software- und softwarebezogenen Serviceerlöse setzen sich aus den Softwareerlösen, den Supporterlösen, den Subskriptionserlösen, den Erlösen aus On-Demand-Services und den sonstigen softwarebezogenen Serviceerlösen zusammen. Die in unserer Konzern-Gewinn- und Verlustrechnung ausgewiesenen Beratungs- und sonstigen Serviceerlöse setzen sich aus unseren Beratungserlösen und den sonstigen Serviceerlösen zusammen. Die in unserer Konzern-Gewinn- und Verlustrechnung erfassten sonstigen Serviceerlöse umfassen hauptsächlich Erlöse aus Schulungsleistungen, Messaging-Services und Marketingveranstaltungen der SAP. Die Aufgliederungen der Umsatzerlöse nach Segmenten und Regionen stellen wir in Textziffer (30) dar.

Wenn die Höhe des Umsatzes aus unseren Produkten oder Dienstleistungen bei Vertragsabschluss nicht verlässlich bestimmt werden kann, schließen wir daraus, dass der Zufluss wirtschaftlichen Nutzens aus der Transaktion nicht wahrscheinlich ist. In diesem Falle realisieren wir den Umsatz erst, wenn die Lizenzgebühr fällig wird. Falls der Zahlungseingang bei Vertragsabschluss nicht hinreichend wahrscheinlich ist, schließen wir daraus, dass der Zufluss eines wirtschaftlichen Nutzens aus der Transaktion nicht wahrscheinlich ist. In diesem Fall realisieren wir die Umsätze erst, wenn entweder der Zahlungseingang wahrscheinlich wird oder die Zahlung eingegangen ist. Wenn der Zahlungseingang unwahrscheinlich wird, bevor alle Umsätze aus einem Vertrag realisiert sind, wird in der Folge nur für bereits eingegangene Zahlungen ein Umsatz erfasst, es sei denn, der Zahlungseingang wird wieder hinreichend wahrscheinlich. Wenn für Kunden eine Einzelwertberichtigung gebildet wurde, wird in der Folge nur für bereits eingegangene Zahlungen ein Umsatz erfasst.

Auslagen, insbesondere für Reisekosten, die den Kunden in Rechnung gestellt werden, sind in den ausgewiesenen Support-, Beratungs- und Schulungsumsätzen enthalten. Für die Zuordnung ausschlaggebend ist die Art der Leistungen, für die Auslagen angefallen sind.

Die Softwareerlöse resultieren aus den Lizenzgebühren, die wir aus dem Verkauf oder der Lizenzierung von Software an Kunden erzielen. Umsatzerlöse aus dem Verkauf von Softwarelizenzen für unsere Standardprodukte werden in Übereinstimmung mit den in IAS 18 *Umsatzerlöse* (IAS 18) genannten Anforderungen an den Verkauf von Gütern realisiert, und zwar wenn nachweislich ein Vertrag vorliegt, die Lieferung erfolgt ist, die mit dem Eigentum verbundenen Risiken und Chancen auf den Kunden übertragen wurden, die Höhe der Erlöse und die zugehörigen Kosten verlässlich bestimmt werden können und der Zahlungseingang für die entsprechende Forderung hinreichend wahrscheinlich ist. Die Umsatzerlöse werden abzüglich Skonti, Preisnachlässen, Kundenboni und Rabatten ausgewiesen. Standardmäßig verkaufen oder lizenzieren wir unsere Software unbefristet. In einzelnen Vertragsverhältnissen räumen wir unseren Kunden ein zeitlich begrenztes Recht zur Nutzung der Software ein. Umsatzerlöse aus Verträgen mit kurzer Laufzeit, die in der Regel auch Supportleistungen beinhalten, realisieren wir ratierlich über die Vertragslaufzeit. Bei zeitlich begrenzten Verträgen mit mehrjährigen Laufzeiten, die Supportleistungen beinhalten – unabhängig davon, ob diese separat berechnet werden oder nicht – werden die zugehörigen Umsätze ebenfalls ratierlich über die Vertragslaufzeit erfasst, sofern die Verträge keine wesentliche Gebühr für die Verlängerung der Supportvereinbarung enthalten. Ist eine solche wesentliche Gebühr vereinbart, realisieren wir den Softwareerlös getrennt von dem Supporterlös gemäß der Residualmethode, sobald die oben genannten Kriterien erfüllt sind. Unsere Softwarelizenzvereinbarungen enthalten grundsätzlich keine Abnahmebestimmungen. Ist im Softwarevertrag ausnahmsweise eine Abnahme der Software oder einer sonstigen Leistung durch den Kunden vereinbart, werden Umsätze erst dann erfasst, wenn entweder die Abnahme erfolgt oder die Abnahmefrist abgelaufen ist. Umsätze aus Software, die über indirekte Vertriebskanäle verkauft wird, erfassen wir erst zu dem Zeitpunkt, an dem uns ein Nachweis über einen Lizenzvertrag zwischen dem Vertriebspartner und dem Endkunden vorliegt, da es nicht wahrscheinlich ist, dass der wirtschaftliche Nutzen aus dem Vertrag der SAP vor dem Abschluss eines solchen Lizenzvertrags mit einem Endkunden zufließt.

Gelegentlich schließen wir Vereinbarungen über die Entwicklung kundenspezifischer Software ab. Die Softwareerlöse aus diesen Vereinbarungen erfassen wir nach der Methode der Teilgewinnrealisierung (Percentage of Completion Method). Basis hierfür bildet das Verhältnis der bislang angefallenen

---

Auftragskosten zu den geschätzten Gesamtkosten, die erforderlich sind, um die Entwicklung abzuschließen. Wenn wir nicht über hinreichende Informationen verfügen, um den Leistungsfortschritt zu messen oder die Gesamterlöse und die Gesamtkosten des Vertrags zu schätzen, erfassen wir den Erlös nur in Höhe der angefallenen Auftragskosten, die wahrscheinlich einbringlich sind. Sobald es wahrscheinlich wird, dass die Gesamtkosten eines Vertrags die Gesamterlöse übersteigen, werden die erwarteten Verluste sofort als Aufwand erfasst. Ausschlaggebend hierfür sind die Kosten, die dem Vertrag zurechenbar sind.

Supporterlöse verkörpern den Umsatz, den wir durch nicht spezifizierte künftige Softwareupgrades, -updates und -erweiterungen sowie durch technischen Support generieren. Die Supporterlöse erfassen wir für die Mehrzahl unserer Dienstleistungen ratierlich über die Laufzeit des Supportvertrags. Technischen Support sowie nicht spezifizierte Softwareupgrades, -updates und -erweiterungen verkaufen wir nicht separat. Dementsprechend unterscheiden wir innerhalb der Software- und softwarebezogenen Serviceerlöse beziehungsweise innerhalb der Software- und softwarebezogenen Servicekosten nicht zwischen den Komponenten technischer Support sowie nicht spezifizierte Softwareupgrades, -updates und -erweiterungen.

Die Subskriptions- und sonstigen softwarebezogenen Serviceerlöse beinhalten die Erlöse aus Subskriptionen, aus der Softwareverpachtung, aus On-Demand-Lösungen und aus anderen softwarebezogenen Dienstleistungen. Subskriptionsverträge kombinieren Software mit Supportleistungen. Bei Subskriptionen erwirbt der Kunde sowohl das Nutzungsrecht für aktuelle Software als auch einen Anspruch auf den Bezug nicht spezifizierter künftiger Softwareprodukte und auf Supportleistungen während der Laufzeit des Subskriptionsvertrag. Der Kunde zahlt eine jährliche Gebühr über eine festgelegte Vertragslaufzeit. Wir erfassen Umsätze aus diesen Gebühren beginnend mit der Lieferung des ersten Produkts ratierlich über die Vertragslaufzeit.

Softwareverpachtungsverträge verbinden ebenfalls Software und Supportleistungen. Solche Verträge verleihen dem Kunden das Recht auf die Nutzung von Software und den Bezug von Supportleistungen, jedoch keinen Anspruch auf den Bezug nicht spezifizierter künftiger Software. Der Kunde zahlt während

der Laufzeit eine regelmäßige Gebühr, und wir erfassen Gebühren aus Softwareverpachtungsverträgen ratierlich über die Vertragslaufzeit.

Die Erlöse aus On-Demand-Lösungen beziehen sich auf Softwareverträge, für die SAP das Hosting bereitstellt. Diese gestatten es dem Kunden, Softwarefunktionen während der Vertragslaufzeit zu nutzen, jedoch nicht, den Vertrag zu kündigen und die Software dauerhaft auf eigenen Systemen in Betrieb zu nehmen, ohne eine signifikante Vertragsstrafe zahlen zu müssen. Umsätze aus On-Demand-Dienstleistungen erfassen wir grundsätzlich ratierlich über die Vertragslaufzeit. Die sonstigen softwarebezogenen Serviceerlöse resultieren im Wesentlichen aus mit anderen Softwareherstellern geschlossenen, softwarebezogenen Verträgen mit Erlösaufteilung.

Erlöse aus Beratungs- und anderen Leistungen werden erfasst, sobald sie erbracht wurden. Die Beratungserlöse resultieren im Wesentlichen aus Implementierungsverträgen für die Installation und Konfiguration unserer Softwareprodukte. Beratungsverträge beinhalten in der Regel keine erheblichen Modifikationen oder sonstigen wesentlichen funktionalen Änderungen und Erweiterungen der Software und werden, wie oben erläutert, nach der Methode der Teilgewinnrealisierung erfasst.

Zu den sonstigen Serviceerlösen zählen Gebühren aus Schulungsleistungen, kündbaren Hostingverträgen, Application Management Services (AMS) und Messaging-Services sowie Erlöse aus Marketingveranstaltungen der SAP und Vermittlungsprovisionen.

Unsere Schulungsleistungen dienen der Bereitstellung von Ausbildungsveranstaltungen für Kunden und Partner zur Nutzung unserer Softwareprodukte. Wir erfassen Schulungserlöse, wenn die entsprechenden Schulungsleistungen erbracht wurden. Kündbare Hostingverträge ermöglichen es dem Kunden, den Vertrag jederzeit zu kündigen und die Software in Besitz zu nehmen, ohne eine beträchtliche Vertragsstrafe zahlen zu müssen. SAP verteilt den Gesamtumsatz aus solchen Hostingverträgen auf das Hostinglelement und auf das Softwareelement. Der der Hostingleistung zuzuordnende Umsatzanteil wird ratierlich über den vereinbarten Hosting-Zeitraum realisiert. Unsere AMS-Leistungen dienen dazu, die IT-Lösung eines Kunden nach ihrer Implementierung zu optimieren und zu verbessern. Wir erfassen Erlöse aus AMS-Leistungen, wenn die entsprechenden Leistungen erbracht wurden. Erlöse aus

---

Messaging-Services betreffen überwiegend Gebühren aus der Übermittlung elektronischer Textnachrichten zwischen verschiedenen Mobilfunkanbietern. Wir erfassen diese Erlöse auf der Grundlage der Anzahl der erfolgreich verarbeiteten und übermittelten Textnachrichten. Erlöse aus Messaging-Vereinbarungen auf Festpreisbasis erfassen wir grundsätzlich ratierlich über die Vertragslaufzeit. Erlöse aus Marketingveranstaltungen, die SAP organisiert und für die SAP an ihre Kunden Eintrittskarten verkauft, erfassen wir, nachdem die jeweilige Veranstaltung stattgefunden hat. Vermittlungsprovisionen sind Provisionen von Partnern, an die wir Kunden weiterempfohlen haben.

Der überwiegende Teil unserer Softwareverkäufe erfolgt im Rahmen von Mehrkomponentenverträgen, da diese mit Supportleistungen und oftmals mit sonstigen Serviceleistungen verbunden sind. Um bei Mehrkomponentenverträgen jenen Betrag zu ermitteln, der bei Auslieferung als Softwareerlös realisierbar ist, folgen wir dem vom Financial Accounting Standards Board (FASB) verabschiedeten ASC Subtopic 985-605, Software Revenue Recognition, unter Berücksichtigung der zugehörigen Ergänzungen, dessen Anwendung durch IAS 8 *Rechnungslegungsmethoden, Änderungen von rechnungslegungsbezogenen Schätzungen und Fehler* (IAS 8) erlaubt ist. Sofern ein Mehrkomponentenvertrag vorliegt, erfassen wir die Erlöse nach der Residualmethode, falls für alle noch nicht erbrachten Leistungen (zum Beispiel Support-, Beratungs- oder sonstige Serviceleistungen) ein unternehmensspezifischer Standardpreis vorliegt, jedoch ein solcher Preis für eine oder mehrere bereits vollständig erbrachte oder gelieferte Leistungen nicht existiert (in der Regel Software). Auf Basis der unternehmensspezifischen Standardpreise ermitteln wir für noch zu erbringende Leistungen den hierauf entfallenden Umsatzanteil und nehmen eine entsprechende Aufteilung der Erlöse vor. Die Standardpreise entsprechen den beizulegenden Zeitwerten, zu denen die Lieferungen und Leistungen auch einzeln von uns angeboten werden. Für Lieferungen und Leistungen, die bislang nicht einzeln von uns angeboten wurden, wird ein von der Geschäftsführung festgesetzter Standardpreis verwendet, sofern es wahrscheinlich ist, dass sich dieser Preis bis zu jenem Zeitpunkt, zu dem das Produkt erstmals gesondert verkauft wird, nicht mehr ändern wird. Die Umsätze, die auf künftig zu erbringende Supportleistungen entfallen, bewerten

wir auf der Grundlage von Preisen für die jährliche Verlängerung von Supportverträgen nach Ablauf einer anfänglichen Laufzeit. Verlängerungen der Supportverträge erfolgen grundsätzlich zu einem Festbetrag beziehungsweise einem festen Prozentsatz der Nettolizenzgebühr. Die überwiegende Mehrheit unserer Kunden verlängert ihren jährlichen Supportvertrag zu diesen Preisen. Sofern wir Kunden eine Option einräumen, noch nicht lizenzierte Produkte zu einem Rabatt zu beziehen, der höher ist als der bei der ursprünglichen Softwarelizenzvereinbarung gewährte Rabatt, grenzen wir Umsatz in Höhe des gewährten Rabatts aus gegenwärtigen Leistungen ab. Diese Beträge ordnen wir jenen Leistungen zu, für die dem Kunden der zusätzliche Rabatt eingeräumt wurde. Entsprechendes gilt bei Support- oder Serviceleistungen, falls wir dem Kunden das Recht einräumen, diese Leistungen zu geringeren Preisen als zu den jeweiligen Standardpreisen zu beziehen oder die Supportverträge zu solchen niedrigeren Preisen zu erneuern.

Wir grenzen den Umsatz für noch nicht erbrachte Leistungen, für die ein Standardpreis existiert, ab und realisieren den verbleibenden Restbetrag des vertraglich vereinbarten Gesamtentgelts als Umsatz, der den bereits erbrachten Leistungen zugerechnet werden kann. Voraussetzung hierfür ist jedoch, dass die oben beschriebenen Bedingungen zur Umsatzrealisierung erfüllt sind und unternehmensspezifische Standardpreise für sämtliche noch zu erbringende Leistungen vorliegen.

Die Kombination oder Aufteilung von Mehrkomponentenverträgen, die aus einer Softwarekomponente sowie Beratungs- oder anderen Servicekomponenten bestehen, ist von folgenden Faktoren abhängig:

- Der Vertrag beinhaltet erhebliche Modifikationen oder sonstige wesentliche Änderungen der Software und
- die Leistungen können nicht durch einen Drittanbieter erbracht werden, weshalb sie als wesentlich für die Software angesehen werden.

Wenn keines der beiden Kriterien erfüllt ist, erfassen wir die Umsätze für die Softwarekomponente und die andere Komponente getrennt voneinander. Ist jedoch eines der beiden Kriterien erfüllt, fassen wir die Teilleistungen des Mehrkomponentenvertrags zu Bewertungseinheiten zusammen und realisieren das Gesamtentgelt, wie oben erläutert, nach der Methode der Teilgewinnrealisierung. Falls der Vertrag mehrere Komponenten enthält, werden diejenigen Komponenten, die

---

die Bedingungen für einen gesonderten Ansatz erfüllen (zum Beispiel Supportleistungen und Hosting), von der Methode der Teilgewinnrealisierung ausgeschlossen und die Umsätze aus diesen Elementen werden getrennt erfasst. Voraussetzung ist jedoch, dass die Komponenten einen eigenständigen Wert haben.

Zuschüsse an unsere Vertriebspartner, die den Partnern qualifizierte und genehmigte Marketingtätigkeiten ermöglichen, werden mit dem Umsatz verrechnet; es sei denn, wir erhalten einen eigenständigen identifizierbaren Vorteil für unsere Leistung, dessen beizulegender Zeitwert in angemessener Weise bestimmt werden kann.

#### **Software- und softwarebezogene Servicekosten**

Die Software- und softwarebezogenen Servicekosten umfassen die Kosten, die im Zusammenhang mit der Herstellung der Produkte beziehungsweise Erbringung der Leistungen anfallen, mit denen wir Software- und softwarebezogene Serviceerlöse erzielen. Somit enthält dieser Posten unter anderem hiermit verbundene Personalaufwendungen, planmäßige Abschreibungen von erworbenen immateriellen Vermögenswerten, Kosten für Lizenzen Dritter und Kosten für die Auslieferung und den Anlaufprozess der Produkte.

#### **Beratungs- und sonstige Servicekosten**

Die Beratungs- und sonstigen Servicekosten umfassen die Kosten für die Erbringung der Leistungen, mit denen wir Beratungs- und sonstige Serviceerlöse, einschließlich der Erlöse aus Messaging-Services, erzielen. Dieser Posten beinhaltet überdies Vertriebs- und Marketingkosten in Zusammenhang mit unseren Beratungs- und sonstigen Leistungen, die aus Vertriebs- und Marketingaktivitäten resultieren, welche nicht klar von der Erbringung der Leistungen abgegrenzt werden können.

#### **Forschungs- und Entwicklungskosten**

Zu den Forschungs- und Entwicklungskosten zählen Kosten, die im Zusammenhang mit der Entwicklung unserer Softwarelösungen (neue Produkte, Updates und Erweiterungen) anfallen, einschließlich der Personal- und Hardwarekosten für die Entwicklungssysteme.

Entwicklungstätigkeit beinhaltet die Anwendung von Forschungsergebnissen oder anderem Wissen auf einen Plan oder Entwurf für neue oder beträchtlich verbesserte Softwareprodukte vor Beginn der kommerziellen Nutzung. Entwicklungsauf-

wendungen werden nur dann aktiviert, wenn alle folgenden Kriterien erfüllt sind:

- Die der Entwicklung des immateriellen Vermögenswertes zurechenbaren Aufwendungen lassen sich zuverlässig bestimmen,
- die technische und wirtschaftliche Realisierbarkeit der Fertigstellung ist gegeben,
- künftiger wirtschaftlicher Nutzen ist wahrscheinlich und
- die Absicht, den immateriellen Vermögenswert fertig zu stellen, um ihn zu nutzen oder zu verkaufen, liegt vor.

Die Kriterien für den Ansatz von selbst geschaffenen immateriellen Vermögenswerten aus der Softwareentwicklung sind bei uns erst kurz vor der Marktreife der Produkte vollständig erfüllt. Entwicklungskosten, die nach der Erfüllung der Aktivierungskriterien entstehen, sind unwesentlich. Demzufolge erfassen wir sämtliche Forschungs- und Entwicklungskosten zum Zeitpunkt ihres Anfalls als Aufwand.

#### **Vertriebs- und Marketingkosten**

Die Vertriebs- und Marketingkosten umfassen Kosten für die Vertriebs- und Marketingaktivitäten im Zusammenhang mit unseren Softwarelösungen, dem softwarebezogenen Serviceportfolio und dem Messaging-Geschäft.

#### **Allgemeine Verwaltungskosten**

Die allgemeinen Verwaltungskosten beinhalten die Kosten für unsere Finanz- und Verwaltungsfunktionen, sofern diese nicht einer der anderen Kategorien der operativen Aufwendungen direkt zugeordnet werden können.

#### **Zuwendungen und Beihilfen der öffentlichen Hand**

Wir erfassen Zuwendungen der öffentlichen Hand, wenn eine angemessene Sicherheit dafür besteht, dass wir die damit verbundenen Bedingungen erfüllen und die Zuwendungen erhalten werden. Die von uns erhaltenen Zuwendungen der öffentlichen Hand stellen in der Regel Zuschüsse für Tätigkeiten dar, die im Rahmen der Zuwendung festgelegt werden. Dementsprechend werden die Zuwendungen zum Realisierungszeitpunkt von den Aufwendungen abgezogen, die für die Kosten erfasst wurden, die diese Zuwendungen kompensieren sollen. Beihilfen der öffentlichen Hand in Form von Steuergutschriften werden als Minderung der Ertragsteuern erfasst. Die in den Geschäfts-



---

jahren 2010, 2009 und 2008 erhaltenen Zuwendungen der öffentlichen Hand waren unwesentlich.

### **Leasingverhältnisse**

Wir mieten Sachanlagevermögen, hauptsächlich Gebäude, Hardware und Fahrzeuge, wobei das wirtschaftliche Eigentum der Vermögenswerte beim Vermieter verbleibt. Der Mietaufwand wird linear über die Vertragslaufzeit verteilt. Hierbei berücksichtigen wir bei Inkrafttreten des Vertrags auch bestehende Vereinbarungen über eine Verlängerung, sofern deren Umsetzung wahrscheinlich ist.

Anreize für die Vereinbarung eines Mietverhältnisses, wie zum Beispiel Vorauszahlungen von Kosten oder die Vereinbarung von mietfreien oder mietermäßigten Zeiten, werden passivisch abgegrenzt und linear über die Laufzeit des Mietverhältnisses verteilt. Gleiches gilt bei vertraglich im Voraus vereinbarten Mietsteigerungen.

### **Ertragsteuern**

Latente Steuern erfassen wir nach der bilanzorientierten Verbindlichkeitsmethode (Liability Method). Wir setzen aktive und passive latente Steuern auf temporäre Differenzen zwischen den bilanziellen Wertansätzen für Vermögenswerte und Schulden und den entsprechenden steuerlichen Wertansätzen an. Latente Steuern bilden wir darüber hinaus auf nicht genutzte steuerliche Verlustvorträge beziehungsweise Steuergutschriften. Aktive latente Steuern werden in dem Umfang angesetzt, in dem es wahrscheinlich ist, dass zukünftiges zu versteuerndes Einkommen zur Verfügung stehen wird, gegen das die abzugsfähigen temporären Differenzen, die noch nicht genutzten steuerlichen Verluste und die noch nicht genutzten Steuergutschriften verwendet werden können.

Latente Steueransprüche und latente Steuerschulden werden unter Zugrundelegung der Steuersätze berechnet, deren Gültigkeit für die Periode, in der ein Vermögenswert realisiert wird oder eine Schuld erfüllt wird, erwartet wird. Dabei werden die Steuersätze und Steuervorschriften zugrunde gelegt, die zum Bilanzstichtag gültig oder angekündigt sind. Die Auswirkung einer Steuersatzänderung auf aktive und passive latente Steuern erfassen wir in dem Berichtszeitraum, in dem die Steuersatzänderung gesetzlich verabschiedet wird, erfolgswirksam, soweit sie sich nicht auf erfolgsneutral erfasste Positionen bezieht.

Der Buchwert der latenten Steueransprüche wird zu jedem Bilanzstichtag überprüft und in dem Umfang vermindert, in dem es nicht mehr wahrscheinlich ist, dass ausreichend zu versteuerndes Ergebnis zur Verfügung stehen wird, um den latenten Steueranspruch entweder teilweise oder insgesamt zu nutzen.

### **Anteilsbasierte Vergütungsprogramme**

Anteilsbasierte Vergütungsprogramme für unsere Mitarbeiter umfassen Vergütungspläne mit Barausgleich sowie Vergütungspläne, deren Ausgleich durch Eigenkapitalinstrumente erfolgt. Die beizulegenden Zeitwerte für beide Arten von Vergütungsplänen werden am Tag der Gewährung anhand eines Optionspreismodells ermittelt.

Eine Neubewertung des beizulegenden Zeitwertes für Vergütungspläne, deren Ausgleich durch Eigenkapitalinstrumente erfolgt, findet in nachfolgenden Perioden nicht statt. Der bei Ausgabe der anteilsbasierten Vergütungen mit Ausgleich durch Eigenkapitalinstrumente ermittelte beizulegende Zeitwert wird mit einem korrespondierenden Anstieg der Kapitalrücklage erfolgswirksam als Personalaufwand über den Zeitraum erfasst, in dem der Anspruch der Mitarbeiter auf die Rechte unverfallbar wird. Der als Aufwand erfasste Betrag wird angepasst, um die tatsächliche Anzahl der Eigenkapitalinstrumente wiederzugeben, die letztlich durch die Mitarbeiter ausübbar werden. Rabatte, die wir unseren Mitarbeitern im Rahmen bestimmter anteilsbasierter Vergütungsprogramme gewähren, hängen nicht von den künftig erbrachten Leistungen unserer Mitarbeiter ab und werden deshalb zum Zeitpunkt ihrer Gewährung als Aufwand erfasst.

Für anteilsbasierte Vergütungsprogramme, die nicht durch Aktien, sondern durch Barauszahlung bedient werden, bilden wir Rückstellungen. Die Höhe der Rückstellung spiegelt den verdienten Teil des beizulegenden Zeitwertes der jeweiligen Rechte zum Berichtszeitpunkt wider. Personalaufwendungen erfassen wir über den Zeitraum, in dem der Angestellte die entsprechenden Leistungen erbringt (Sperrfrist). Die Rückstellung wird entsprechend angepasst. Anteilsbasierte Vergütungsprogramme mit Barausgleich werden bis zu ihrer Bedienung zu jedem Bilanzstichtag zum aktuellen beizulegenden Zeitwert bewertet. Jede Änderung des beizulegenden Zeitwertes der Verbindlichkeit wird erfolgswirksam im Personalaufwand

---

erfasst. Die Höhe der noch nicht erfolgswirksam erfassten Personalaufwendungen für verfallbare Bezugsrechte aus unseren Vergütungsprogrammen mit Barausgleich richtet sich nach dem inneren Wert der Bezugsrechte zum Ausübungszeitpunkt. Da der Betrag von künftigen Aktienkursänderungen abhängt, lässt er sich nicht zuverlässig prognostizieren.

In den Fällen, in denen wir unsere Risikoposition in Bezug auf Vergütungsprogramme mit Barausgleich abgesichert haben, erfassen wir die Änderungen des beizulegenden Zeitwertes der jeweiligen Sicherungsinstrumente ebenfalls erfolgswirksam als Personalaufwand. Die beizulegenden Zeitwerte der Vergütungsprogramme in einer Sicherungsbeziehung basieren auf Marktdaten und spiegeln somit die allgemeinen aktuellen Markterwartungen wider.

Weitere Einzelheiten zu unseren anteilsbasierten Vergütungsprogrammen sind in Textziffer (28) aufgeführt.

### **Sonstige Eigenkapitalbestandteile**

Die sonstigen Eigenkapitalbestandteile umfassen folgende Posten:

- Gewinne und Verluste aus der Umrechnung der Abschlüsse unserer ausländischen Geschäftsbetriebe sowie Gewinne und Verluste aus der Umrechnung von konzerninternen langfristigen monetären Posten, deren Abwicklung in einem absehbaren Zeitraum weder geplant noch wahrscheinlich ist.
- Unrealisierte Gewinne und Verluste aus der Neubewertung von zur Veräußerung verfügbaren finanziellen Vermögenswerten.
- Gewinne und Verluste aus Cashflow-Hedges, bestehend aus der Nettoänderung des beizulegenden Zeitwertes des effektiven Teils der jeweiligen Cashflow-Hedges, die sich noch nicht ergebniswirksam ausgewirkt haben.

### **Eigene Aktien**

Eigene Aktien bewerten wir mit ihren Anschaffungskosten und weisen sie als Abzug vom Eigenkapital gesondert aus. Gewinne und Verluste aus einer späteren Weitergabe erfassen wir – nach Ertragsteuern – zugunsten oder zulasten der Agien. Beim Einzug eigener Aktien erfassen wir den Betrag, um den ihr Buchwert den rechnerischen Nennbetrag übersteigt, in den Gewinnrücklagen.

### **Ergebnis je Aktie**

Wir ermitteln das unverwässerte und das verwässerte Ergebnis je Aktie. Das unverwässerte Ergebnis je Aktie errechnet sich mittels Division des den Anteilseignern der SAP AG zustehenden Gewinns nach Steuern durch die gewichtete durchschnittliche Zahl der im Umlauf befindlichen Stammaktien. Das verwässerte Ergebnis je Aktie berücksichtigt zusätzlich den potenziellen Verwässerungseffekt, der aus der möglichen Umwandlung aller ausgegebenen, mit Rechten auf Aktien versehenen und „im Geld“ befindlichen Rechten in Stammaktien resultieren würde. Um den Verwässerungseffekt aus Aktienoptionen zu berechnen, ziehen wir zur Ermittlung des durchschnittlichen Marktwertes der Aktien der Gesellschaft die notierten Marktpreise während des Zeitraums, in dem die Optionen im Umlauf waren, heran.

### **Finanzielle Vermögenswerte**

Zu unseren finanziellen Vermögenswerten gehören Zahlungsmittel und Zahlungsmitteläquivalente (liquiditätsnahe Vermögenswerte, deren ursprüngliche Fälligkeit maximal drei Monate beträgt), Kredite und Forderungen, erworbene Eigenkapital- und Schuldinstrumente sowie derivative Finanzinstrumente (Derivate) mit positivem beizulegenden Zeitwert.

Diese Vermögenswerte werden gemäß IAS 39 *Finanzinstrumente: Ansatz und Bewertung* (IAS 39) erfasst. Dementsprechend werden finanzielle Vermögenswerte in der Konzernbilanz angesetzt, wenn wir ein vertragliches Recht auf den Erhalt von Zahlungsmitteln oder anderen finanziellen Vermögenswerten eines anderen Unternehmens haben. Marktübliche Käufe oder Verkäufe werden zum beizulegenden Zeitwert am Handelstag bilanziert. Finanzielle Vermögenswerte werden beim erstmaligen Ansatz zum beizulegenden Zeitwert bewertet, zuzüglich direkt zurechenbarer Transaktionskosten bei finanziellen Vermögenswerten, die nicht erfolgswirksam zum beizulegenden Zeitwert bewertet werden. Unverzinsliche oder niedrig verzinsliche Kredite und Forderungen bilanzieren wir bei Zugang mit dem Barwert der erwarteten künftigen Cashflows. Die Folgebewertung richtet sich nach der Zuordnung unserer finanziellen Vermögenswerte zu den folgenden Kategorien gemäß IAS 39:

- Kredite und Forderungen: Kredite und Forderungen sind nicht derivative finanzielle Vermögenswerte mit festen oder bestimmbareren Zahlungen, die nicht auf einem aktiven Markt

---

gehandelt werden und die nicht für einen kurzfristigen Verkauf vorgesehen sind. Diese Kategorie umfasst Forderungen aus Lieferungen und Leistungen, in den sonstigen finanziellen Vermögenswerten enthaltene Kredite und Forderungen sowie Zahlungsmittel und Zahlungsmitteläquivalente. Kredite und Forderungen bilanzieren wir zu fortgeführten Anschaffungskosten abzüglich Wertminderungen. Zinsen aus dieser Kategorie zugeordneten Posten werden auf Basis der Effektivzinsmethode erfasst, wenn der Zinseffekt wesentlich ist. Weitere Informationen zu den Forderungen aus Lieferungen und Leistungen enthält der Abschnitt „Forderungen aus Lieferungen und Leistungen und sonstige Forderungen“.

- Zur Veräußerung verfügbare finanzielle Vermögenswerte: Zur Veräußerung verfügbare finanzielle Vermögenswerte sind nicht derivative finanzielle Vermögenswerte, die keiner der beiden anderen Kategorien zugeordnet wurden, und umfassen hauptsächlich Beteiligungen und Schuldinstrumente. Zur Veräußerung verfügbare finanzielle Vermögenswerte werden mit dem beizulegenden Zeitwert bewertet, wenn dieser unmittelbar auf Basis von Marktdaten bestimmbar ist. Änderungen des beizulegenden Zeitwertes werden nach Abzug von Steuern in den sonstigen Eigenkapitalbestandteilen ausgewiesen. Änderungen des beizulegenden Zeitwertes werden erst beim Verkauf der Vermögenswerte oder bei Vorliegen einer Wertminderung erfolgswirksam erfasst. Zur Veräußerung verfügbare finanzielle Vermögenswerte, für die kein Marktpreis verfügbar ist und deren beizulegender Zeitwert wegen des Fehlens eines aktiven Marktes nicht zuverlässig ermittelbar ist, werden zu Anschaffungskosten abzüglich Wertminderungen bewertet.
- Erfolgswirksam zum beizulegenden Zeitwert bewertete finanzielle Vermögenswerte: Zur Gruppe der erfolgswirksam zum beizulegenden Zeitwert bewerteten finanziellen Vermögenswerte gehören lediglich diejenigen finanziellen Vermögenswerte, die zu Handelszwecken gehalten werden, da wir beim erstmaligen Ansatz keine finanziellen Vermögenswerte als erfolgswirksam zum beizulegenden Zeitwert designieren. Diese Kategorie umfasst ausschließlich eingebettete und freistehende Derivate mit einem positiven beizulegenden Zeitwert, außer wenn diese nach den Kriterien der Bilanzierung von Sicherungsbeziehungen erfasst werden. Sämtliche Änderungen des beizulegenden Zeitwertes von finanziellen Vermögenswerten dieser Kategorie werden unmittelbar erfolgswirksam erfasst. Für weitere Erläuterungen zu Derivaten verweisen wir auf den Abschnitt „Derivate“.

Sämtliche finanziellen Vermögenswerte, die nicht erfolgswirksam zum beizulegenden Zeitwert bilanziert werden, überprüfen wir an jedem Bilanzstichtag auf ihre Werthaltigkeit oder dann, wenn wir Kenntnis von objektiven Hinweisen auf eine Wertminderung infolge eines oder mehrerer Ereignisse haben, die Anhaltspunkte dafür liefern, dass der Buchwert des Vermögenswertes nicht erzielbar sein könnte. Objektive Hinweise sind beispielsweise eine erhebliche oder längerfristige Abnahme des beizulegenden Zeitwertes eines finanziellen Vermögenswertes unter seinen Buchwert, eine hohe Wahrscheinlichkeit eines Insolvenzverfahrens oder sonstigen Sanierungsfalls oder ein Vertragsbruch durch den Emittenten, beispielsweise erhebliche Zahlungsverzögerungen oder ähnliche Zahlungsschwierigkeiten. Wertminderungsaufwendungen in Höhe des Unterschiedsbeitrages zwischen dem Buchwert eines Vermögenswertes und dem Barwert der erwarteten zukünftigen Cashflows beziehungsweise des gegenwärtigen beizulegenden Zeitwertes werden im Finanzergebnis erfasst. Bei zur Veräußerung verfügbaren finanziellen Vermögenswerten mindern solche Wertminderungsaufwendungen direkt den Buchwert eines Vermögenswertes, wohingegen Wertminderungen auf Kredite und Forderungen in einem Wertberichtigungskonto gebucht werden. Wir buchen Forderungen gegen das entsprechende Wertberichtigungskonto aus, wenn sämtliche Möglichkeiten zum Eintreiben der Forderungen erschöpft und diese als uneinbringlich zu betrachten sind. Wenn der Grund für eine ursprünglich erfasste Wertminderung entfällt, wird eine entsprechende Zuschreibung vorgenommen. Bei zur Veräußerung verfügbaren Beteiligungen werden keine solchen Zuschreibungen erfasst.

Erträge und Aufwendungen sowie Gewinne und Verluste aus finanziellen Vermögenswerten enthalten Wertminderungen und Zuschreibungen, Zinserträge und -aufwendungen, Dividenden sowie Gewinne und Verluste aus dem Abgang solcher Vermögenswerte. Dividenden erfassen wir bei Realisierung als Ertrag. Zinserträge erfassen wir auf Basis der Effektivzinsmethode. Bei Abgang eines Vermögenswertes werden weder Dividenden- noch Zinserträge in die Berechnung des Nettogewinns oder -verlusts einbezogen. Finanzielle Vermögenswerte werden ausgebucht, wenn die vertraglichen Rechte an den Cashflows aus den finanziellen Vermögenswerten erlöschen oder wenn im Wesentlichen alle Risiken und Chancen aus dem Eigentum der finanziellen Vermögenswerte übertragen werden.

---

### **Beteiligungen an assoziierten Unternehmen**

Unternehmen, auf deren Geschäfts- und Finanzpolitik wir zwar keinen beherrschenden, aber einen maßgeblichen Einfluss ausüben können (assoziierte Unternehmen), werden nach der Equity-Methode in den Konzernabschluss einbezogen.

### **Derivate**

Wir bilanzieren Derivate und Sicherungsbeziehungen entsprechend IAS 39 zum beizulegenden Zeitwert.

### ***Derivative Finanzinstrumente ohne designierten Sicherungscharakter***

Viele Transaktionen stellen wirtschaftliche Absicherungen dar und tragen somit effektiv zur Absicherung finanzieller Risiken bei, ohne jedoch die Bedingungen für die Bilanzierung einer Sicherungsbeziehung gemäß IAS 39 zu erfüllen. Für die Absicherung von Kursänderungsrisiken angesetzt monetärer Vermögenswerte und Verbindlichkeiten in Fremdwährungen designieren wir unsere zu Handelszwecken gehaltenen derivativen Finanzinstrumente nicht als Teil einer Sicherungsbeziehung, da die realisierten Gewinne/Verluste der zugrunde liegenden Transaktionen in denselben Perioden erfolgswirksam erfasst werden wie die realisierten Gewinne/Verluste aus den Derivaten.

### ***Eingebettete Derivate***

Vereinzelt schließen wir Verträge ab, die Zahlungsströme in einer anderen als den Währungen der beiden Vertragspartner generieren. Solche eingebetteten Fremdwährungsderivate werden vom Basisvertrag getrennt und als freistehende Derivate bilanziert, wenn die folgenden Bedingungen erfüllt sind:

- Die wirtschaftlichen Merkmale und Risiken des Basisvertrags und des eingebetteten Derivats sind nicht eng miteinander verbunden.
- Ein eigenständiges Instrument mit den gleichen Bedingungen wie das eingebettete Derivat würde die Definition eines Derivats erfüllen.
- Das strukturierte Instrument wird nicht erfolgswirksam zum beizulegenden Zeitwert bewertet.

### ***Derivative Finanzinstrumente mit designedem Sicherungscharakter (Cashflow-Hedge)***

Derivate, die Teil einer Sicherungsbeziehung sind, die die Anforderungen für die Bilanzierung von Sicherungsbeziehungen gemäß IAS 39 erfüllt, werden mit ihrem beizulegenden Zeitwert

angesetzt. Wir designieren das derivative Finanzinstrument als Sicherungsinstrument und dokumentieren die Sicherungsbeziehung. Diese Dokumentation beinhaltet die Art des Risikos, das abgesicherte Grundgeschäft und Informationen darüber, wie wir die Effektivität beurteilen. Die bilanzielle Berücksichtigung der Zeitwertänderungen der Sicherungsinstrumente ist von der Effektivität der Sicherungsbeziehung abhängig. Der effektive Teil der unrealisierten Gewinne oder Verluste aus dem derivativen Finanzinstrument, das als effektive Sicherungsbeziehung eingestuft wird, wird als Bestandteil der sonstigen Eigenkapitalbestandteile ausgewiesen. In der Folge wird der in den sonstigen Eigenkapitalbestandteilen erfasste Teil der Gewinne oder Verluste in die Gewinn- und Verlustrechnung umgebucht, wenn die abgesicherte Transaktion erfolgswirksam wird. Der ineffektive Teil der Gewinne oder Verluste wird sofort erfolgswirksam erfasst. Nähere Erläuterungen zu unseren Sicherungsgeschäften finden sich in Textziffer (26).

### ***Bewertung und Beurteilung der Effektivität***

Der beizulegende Zeitwert der Derivate wird durch Abzinsung der erwarteten künftigen Cashflows mit den relevanten Zinssätzen und Kassakursen über die Restlaufzeit der Verträge ermittelt.

Gewinne/Verluste aus dem Kassakurs und den inneren Werten der Derivate, die als Cashflow-Hedges designiert sind und qualifizieren, werden direkt in den sonstigen Eigenkapitalbestandteilen erfasst, während Gewinne/Verluste aus der Zinskomponente sowie denjenigen Zeitwerten, die aus der Sicherungsbeziehung ausgeschlossen sind, sofort ergebniswirksam erfasst werden.

Die Effektivität der Sicherungsbeziehung wird sowohl prospektiv als auch retrospektiv beurteilt. Die prospektive Beurteilung basiert bei unseren Währungssicherungen auf der Critical-Terms-Match-Methode, da Währungen, Laufzeiten und Beträge für die geplanten Geschäftsvorfälle oder für die Kassakomponente des Devisentermingeschäfts beziehungsweise für den inneren Wert der Devisenoption identisch sind. Bei Zinsswaps wenden wir ebenfalls die Critical-Terms-Match-Methode an, da die Nominalbeträge, die Währungen, die Laufzeiten, die Basis der variablen Seite (EURIBOR), die Zinsanpassungstermine sowie die Termine der Zins- und Tilgungszahlungen für die Schuld-

---

titel und die entsprechenden Zinsswaps identisch sind. Über die Laufzeit des Sicherungsinstruments gleichen die Änderungen der Cashflows der in die Sicherungsbeziehung einbezogenen Komponenten den Effekt aus Schwankungen der zugrunde liegenden geplanten Geschäftsvorfälle aus.

Die retrospektive Beurteilung der Effektivität erfolgt auf kumulierter Basis unter Anwendung der Dollar-Offset-Methode mithilfe der hypothetischen Derivate-Methode. Bei diesem Ansatz wird die Veränderung des beizulegenden Zeitwertes eines konstruierten hypothetischen Derivats mit Parametern, die denen des jeweiligen Grundgeschäfts entsprechen, mit der Veränderung des beizulegenden Zeitwertes des Sicherungsinstruments verglichen. Die Absicherung gilt als hocheffektiv, wenn die Ergebnisse im Bereich zwischen 80 % und 125 % liegen.

#### **Forderungen aus Lieferungen und Leistungen und sonstige Forderungen**

Forderungen aus Lieferungen und Leistungen weisen wir in Höhe des fakturierten Betrags abzüglich Erlösschmälerungen und Wertberichtigungen aus. Diese Erlösschmälerungen und Wertberichtigungen werden auf Basis einer Analyse der wesentlichen ausstehenden Rechnungen verbucht. Die folgenden Faktoren beziehen wir in die Analyse der Werthaltigkeit unserer Forderungen aus Lieferungen und Leistungen ein:

- Zuerst betrachten wir die Zahlungsfähigkeit einzelner Kunden und verbuchen eine Wertberichtigung für einzelne Kundensalden, wenn es wahrscheinlich erscheint, dass wir die vertraglich vereinbarte Forderung nicht erhalten werden.
- Zweitens bilden wir für Forderungen aus Lieferungen und Leistungen Wertberichtigungen auf Basis homogener Forderungsklassen. Basis hierfür bildet das mit ihnen verbundene Ausfallrisiko, das sich nach dem Alter der Forderungen, den in der Vergangenheit festgestellten Forderungsausfällen, aber auch nach den allgemeinen Marktbedingungen richtet. Wir bilden eine pauschalierte Wertberichtigung zur Berücksichtigung von Wertminderungen für ein Forderungsportfolio, wenn wir der Ansicht sind, dass das Alter der Forderungen einen Anhaltspunkt dafür liefert, dass es wahrscheinlich ist, dass ein Verlust eingetreten ist oder die ausstehenden Zahlungen nicht oder nicht vollständig einbringlich sind.

Wir buchen Forderungen gegen Wertberichtigungen aus, wenn sämtliche Möglichkeiten zum Eintreiben der Forderungen erschöpft und diese als uneinbringlich zu betrachten sind.

Aufwendungen aus der Erfassung von Wertberichtigungen auf Basis homogener Forderungsklassen werden in den sonstigen betrieblichen Erträge, netto, erfasst. Aufwendungen aus der Erfassung von Wertberichtigungen für einzelne Kunden werden hingegen in den Software- und softwarebezogenen Servicekosten oder den Beratungs- und sonstigen Servicekosten erfasst, jeweils in Abhängigkeit vom zugrunde liegenden Geschäftsvorgang. Erlösschmälerungen werden mit dem entsprechenden Erlösposten in der Konzern-Gewinn- und Verlustrechnung verrechnet.

In den Forderungen aus Lieferungen und Leistungen sind auch nicht fakturierte Leistungen aus Beratungsprojekten auf Festpreisbasis sowie auf Zeit- und Materialbasis enthalten.

#### **Sonstige nicht finanzielle Vermögenswerte**

Die sonstigen nicht finanziellen Vermögenswerte setzen wir zu fortgeführten Anschaffungskosten an, die aufgrund ihrer Kurzfristigkeit dem beizulegenden Zeitwert entsprechen.

Wir erfassen die Abzinsung der Darlehen an Mitarbeiter als aktive Rechnungsabgrenzungsposten und lösen sie ratierlich als Personalaufwand auf.

#### **Immaterielle Vermögenswerte**

Erworbene immaterielle Vermögenswerte mit einer begrenzten Nutzungsdauer werden zu Anschaffungskosten aktiviert und entweder über die Dauer der voraussichtlichen Nutzung oder über ihre geschätzte Nutzungsdauer von zwei bis 16 Jahren linear abgeschrieben. Sämtliche von uns aktivierten immateriellen Vermögenswerte, mit Ausnahme von Geschäfts- oder Firmenwerten, haben eine begrenzte Nutzungsdauer und unterliegen deshalb einer planmäßigen Abschreibung.

Wir setzen einen vom Geschäfts- oder Firmenwert getrennten immateriellen Vermögenswert für erworbene, noch nicht abgeschlossene Forschungs- oder Entwicklungsprojekte an, wenn die Ansatzkriterien für Vermögenswerte nach IFRS 3 erfüllt sind. Die Abschreibung dieser aktivierten immateriellen Entwicklungsprojekte beginnt, wenn die Entwicklungsprojekte

beendet wurden und die entwickelte Software vermarktungsfähig ist. Wir schreiben diese immateriellen Vermögenswerte üblicherweise über einen Zeitraum von fünf Jahren ab.

### Sachanlagen

Sachanlagen werden zu Anschaffungs- oder Herstellungskosten zuzüglich des Zeitwertes der möglicherweise im Abgangszeitpunkt zu erwartenden Abbruchkosten, sofern diese verlässlich geschätzt werden können, und abzüglich der kumulierten Abschreibungen bewertet. Fremdkapitalkosten, die für die Finanzierung von qualifizierten Vermögenswerten im Zeitraum ihrer Herstellung anfallen, werden aktiviert und beginnend mit der Fertigstellung über die voraussichtliche Nutzungsdauer der Sachanlagen planmäßig abgeschrieben.

Sachanlagen schreiben wir im Regelfall linear über ihre erwartete Nutzungsdauer ab. Grundbesitz wird nicht abgeschrieben.

### Nutzungsdauer der Sachanlagen

|                                |                                                   |
|--------------------------------|---------------------------------------------------|
| Gebäude                        | 25 bis 50 Jahre                                   |
| Mietereinbauten                | in Abhängigkeit von der Laufzeit des Mietvertrags |
| Hardware                       | 3 bis 5 Jahre                                     |
| Büro- und Geschäftsausstattung | 4 bis 20 Jahre                                    |
| Kraftfahrzeuge                 | 4 bis 5 Jahre                                     |

Die Abschreibung von Mietereinbauten erfolgt über die voraussichtliche Nutzungsdauer oder die Laufzeit des Mietvertrags, je nachdem, welcher Zeitraum kürzer ist. Bei der Bestimmung des verwendeten Abschreibungszeitraums werden Mietverlängerungsoptionen berücksichtigt, sofern ihre Ausübung wahrscheinlich ist.

### Wertminderungen von Geschäfts- oder Firmenwerten und langfristigen Vermögenswerten

Wir überprüfen den Geschäfts- oder Firmenwert mindestens einmal jährlich auf Werthaltigkeit. Darüber hinaus wird ein Werthaltigkeitstest durchgeführt, wenn Ereignisse oder Marktentwicklungen anzeigen, dass der erzielbare Betrag einer zahlungsmittelgenerierenden Einheit unter ihren Buchwert gefallen sein könnte.

Der erzielbare Betrag von Geschäfts- oder Firmenwerten wird jährlich stets zum selben Zeitpunkt geschätzt. Außerdem überprüfen wir die Werthaltigkeit unserer langfristigen Vermögenswerte – darunter fallen das Sachanlagevermögen sowie erworbene immaterielle Vermögenswerte –, wenn aufgrund besonderer Ereignisse oder der Veränderung von Rahmenbedingungen ein Anhaltspunkt dafür besteht, dass der Buchwert eines Vermögenswertes oder einer Gruppe von Vermögenswerten niedriger sein könnte als der erzielbare Betrag.

Im Rahmen des Werthaltigkeitstests fassen wir Vermögenswerte, die nicht einzeln überprüft werden können, in der kleinsten Gruppe von Vermögenswerten zusammen, die aus der fortgesetzten Nutzung Mittelzuflüsse erzeugt, die von denen anderer Vermögenswerte oder Gruppen von Vermögenswerten weitestgehend unabhängig sind („zahlungsmittelgenerierende Einheit“ oder „CGU“). Der erzielbare Betrag eines Vermögenswertes oder einer zahlungsmittelgenerierenden Einheit ist der höhere aus beizulegendem Zeitwert abzüglich anfallender Verkaufskosten und dem Nutzungswert. Bei der Bewertung des Nutzungswertes zinsen wir die geschätzten zukünftigen Cashflows auf ihren Barwert mit einem Zinssatz vor Steuern ab, der die gegenwärtigen Markteinschätzungen des Zinseffektes und die speziellen Risiken eines Vermögenswertes widerspiegelt.

Im Rahmen von Unternehmenszusammenschlüssen erworbene Geschäfts- oder Firmenwerte werden den Segmenten zugeordnet, die von den Synergien aus dem Zusammenschluss voraussichtlich profitieren werden. Diese Zuordnung erfolgt auf Basis unseres Managementansatzes. Folglich wird der Werthaltigkeitstest für Geschäfts- oder Firmenwerte auf Segmentebene durchgeführt.

Unsere gemeinschaftlichen Vermögenswerte erzielen keine gesonderten Mittelzuflüsse. Wenn ein Anhaltspunkt dafür vorliegt, dass ein gemeinschaftlicher Vermögenswert wertgemindert sein könnte, bestimmen wir den erzielbaren Betrag für die zahlungsmittelgenerierende Einheit, zu welcher der gemeinschaftliche Vermögenswert gehört.

Ein Wertminderungsaufwand wird erfasst, wenn der Buchwert eines Vermögenswertes oder einer zahlungsmittelgenerierenden Einheit seinen beziehungsweise ihren erzielbaren Betrag übersteigt. Solche Wertminderungsaufwendungen werden erfolgswirksam in den sonstigen betrieblichen Erträgen, netto erfasst.

---

In früheren Perioden erfasste Wertminderungen für langfristige materielle und immaterielle Vermögenswerte werden an jedem Bilanzstichtag dahingehend überprüft, ob Anhaltspunkte vorliegen, dass die Wertminderung sich reduziert hat oder gar keine Wertminderung mehr besteht. Wenn daher ein Anhaltspunkt dafür vorliegt, dass die Gründe für die Wertminderung nicht mehr bestehen, ziehen wir eine erfolgswirksame vollständige oder teilweise Zuschreibung in Betracht. Für Wertminderungsaufwendungen von Geschäfts- oder Firmenwerten erfassen wir hingegen keine Zuschreibungen.

#### **Eventualforderungen**

Wir haben Versicherungen abgeschlossen, unter anderem um Aufwendungen der Verteidigung bei Rechtsstreitigkeiten abzudecken. Zur Reduzierung des Risikos von Forderungsausfällen sind unsere Forderungen aus Lieferungen und Leistungen zum Teil durch Kreditversicherungen abgedeckt. Wir erfassen die entsprechenden Erstattungen erfolgswirksam, wenn es so gut wie sicher ist, dass wir die Erstattung erhalten werden und sie nicht zurückzahlen müssen.

#### **Verbindlichkeiten**

##### **Finanzielle Verbindlichkeiten**

Zur Gruppe der finanziellen Verbindlichkeiten gehören Verbindlichkeiten aus Lieferungen und Leistungen, Verbindlichkeiten gegenüber Kreditinstituten, emittierte Anleihen, Privatplatzierungen und sonstige Finanzverbindlichkeiten, die derivative und nicht derivative finanzielle Verbindlichkeiten umfassen.

Diese Verbindlichkeiten werden gemäß IAS 39 erfasst und bewertet. Dementsprechend setzen wir finanzielle Verbindlichkeiten in der Konzernbilanz an, wenn wir eine vertragliche Verpflichtung zur Übertragung von Zahlungsmitteln oder eines anderen finanziellen Vermögenswertes an ein anderes Unternehmen haben. Finanzielle Verbindlichkeiten werden beim erstmaligen Ansatz zum beizulegenden Zeitwert bewertet, der bei nicht erfolgswirksam zum beizulegenden Zeitwert bewerteten finanziellen Verbindlichkeiten direkt zurechenbare Transaktionskosten einschließt. Finanzielle Verbindlichkeiten werden anhand aktueller, um das Kreditrisiko bereinigter Marktzinsen auf den Barwert abgezinst, sofern der Zinseffekt wesentlich ist. Die Abzinsungsbeträge werden im Zeitablauf als Zinsaufwen-

dungen erfasst. Die Folgebewertung hängt von der Zuordnung der finanziellen Verbindlichkeiten zu den folgenden Kategorien gemäß IAS 39 ab:

- Zur Gruppe der erfolgswirksam zum beizulegenden Zeitwert bewerteten finanziellen Verbindlichkeiten gehören lediglich diejenigen finanziellen Verbindlichkeiten, die als zu Handelszwecken gehalten klassifiziert werden, da wir beim erstmaligen Ansatz keine finanziellen Verbindlichkeiten als erfolgswirksam zum beizulegenden Zeitwert designieren. Diese Kategorie umfasst ausschließlich eingebettete und andere Derivate mit einem negativen beizulegenden Zeitwert, außer wenn diese nach den Kriterien der Bilanzierung von Sicherungsbeziehungen erfasst werden. Sämtliche Änderungen des beizulegenden Zeitwertes von finanziellen Verbindlichkeiten dieser Kategorie werden unmittelbar erfolgswirksam erfasst. Für weitere Erläuterungen zu Derivaten verweisen wir auf den Abschnitt „Derivate“.
- Zu fortgeführten Anschaffungskosten bewertete finanzielle Verbindlichkeiten umfassen alle nicht derivativen finanziellen Verbindlichkeiten, die nicht auf einem aktiven Markt gehandelt werden. Die fortgeführten Anschaffungskosten werden nach der Effektivzinsmethode ermittelt.

Aufwendungen beziehungsweise Gewinne und Verluste aus finanziellen Verbindlichkeiten beinhalten Zinsaufwendungen sowie Gewinne und Verluste aus dem Abgang solcher Verbindlichkeiten. Zinsaufwendungen erfassen wir nach der Effektivzinsmethode.

Finanzielle Verbindlichkeiten buchen wir aus, wenn die vertraglichen Verpflichtungen erfüllt, gekündigt oder erloschen sind.

##### **Nicht finanzielle Verbindlichkeiten**

Sonstige nicht finanzielle Verbindlichkeiten mit festen oder bestimmbareren Zahlungen, die nicht auf einem aktiven Markt gehandelt werden, sind hauptsächlich auf Verpflichtungen gegenüber Mitarbeitern und Steuerbehörden zurückzuführen und werden grundsätzlich zu fortgeführten Anschaffungskosten bewertet.

## Rückstellungen

Wir bilden Rückstellungen wenn:

- mehr dafür als dagegen spricht, dass eine gegenwärtige Verpflichtung (rechtlicher oder faktischer Natur) gegenüber Dritten aus einem vergangenen Ereignis besteht,
- die voraussichtliche Höhe des notwendigen Betrags zuverlässig schätzbar ist und
- es wahrscheinlich ist, dass die Erfüllung dieser Verpflichtung zu einem Abfluss von Ressourcen führen wird, wenngleich Unsicherheiten hinsichtlich des Zeitpunktes oder der Höhe der künftig erforderlichen Ausgaben bestehen.

Die Höhe der Rückstellung passen wir regelmäßig an, wenn uns neue Erkenntnisse vorliegen oder veränderte Rahmenbedingungen bestehen. Langfristige Rückstellungen werden mit dem Barwert der erwarteten Erfüllungsbeträge zum Bilanzstichtag angesetzt. Die Abzinsungssätze werden regelmäßig den vorherrschenden Marktzinssätzen angepasst.

Unsere Softwareverträge enthalten normalerweise allgemeine Garantiebestimmungen, die die Umsetzung der von uns angegebenen Spezifikationen durch die Software für sechs bis zwölf Monate garantieren. Rückstellungen für Gewährleistungen bilden wir zum Zeitpunkt des Verkaufs unserer Software, soweit solche Garantiebestimmungen bestehen. Wir bewerten diese Rückstellungen auf der Grundlage historischer Durchschnittskosten zur Erfüllung unserer Verpflichtungen und klassifizieren sie als kurzfristige Rückstellungen.

Eine Rückstellung für Restrukturierungsaufwendungen wird gebildet, sofern wir einen detaillierten und formalen Restrukturierungsplan aufgestellt haben und die Restrukturierungsmaßnahmen bereits begonnen oder angekündigt wurden.

## Verpflichtungen aus Leistungen nach Beendigung des Arbeitsverhältnisses

Rückstellungen für leistungsorientierte Pensionsverpflichtungen und andere Verpflichtungen aus Leistungen nach Beendigung des Arbeitsverhältnisses ermitteln wir auf Basis versicherungsmathematischer Gutachten unter Anwendung des Anwartschaftsbarwertverfahrens gemäß IAS 19. Die Rechnungsgrundlagen, die der Ermittlung der Pensionsverpflichtung sowie des Pensionsaufwands zugrunde liegen, führen wir

in Textziffer (19a) auf. Als Ergebnis der versicherungsmathematischen Rechnungen für jeden Plan weisen wir bei Über- oder Unterdeckung einen Vermögensgegenstand oder eine Rückstellung für den jeweiligen leistungsorientierten Pensionsplan aus. Für jeden einzelnen Pensionsplan klassifizieren wir den Teil der Rückstellung als kurzfristig, um den der versicherungsmathematische Gegenwartswert der in der Rückstellung enthaltenen, innerhalb der nächsten zwölf Monate zahlbaren Versorgungsleistung den beizulegenden Zeitwert des zugeordneten Planvermögens übersteigt. Änderungen der Pensionsverpflichtung oder der Planvermögenswerte aufgrund demografischer und finanzieller Daten, die sich anders als erwartet entwickelt haben, sowie aufgrund von Änderungen der zugrunde gelegten Annahmen können zu versicherungsmathematischen Gewinnen und Verlusten führen. Wir erfassen alle versicherungsmathematischen Gewinne und Verluste erfolgsneutral in den Gewinnrücklagen.

Pensionsleistungen werden als beitragsorientiert klassifiziert, sofern SAP durch die Zahlung an einen separaten Fonds von allen Verpflichtungen des Pensionsplans entbunden ist. Beitragsverpflichtungen aus beitragsorientierten Plänen erfassen wir bei Fälligkeit als Aufwand in der Gewinn- und Verlustrechnung.

## Passive Rechnungsabgrenzungsposten

Passive Rechnungsabgrenzungsposten werden je nach Abgrenzungsgrund als Softwareerlöse, Supporterlöse, Beratungs- und sonstige Serviceerlöse oder als sonstige Erlöse erfasst, sobald die grundlegenden Kriterien der Umsatzrealisierung erfüllt sind. Dies ist beispielsweise der Fall, wenn die entsprechenden Leistungen erbracht oder die Rabatte in Anspruch genommen werden.

## Darstellung der Konzernkapitalflussrechnung

Wir weisen gezahlte Zinsen und gezahlte Steuern ebenso wie erhaltene Zinsen und Dividenden im Cashflow aus der betrieblichen Tätigkeit aus. Gezahlte Dividenden werden im Cashflow aus Finanzierungstätigkeiten berücksichtigt.

## (3c) Ermessensausübungen des Managements und Quellen von Schätzungsunsicherheiten

Die Anwendung der Bilanzierungs- und Bewertungsmethoden und die Bewertung von Vermögenswerten, Verbindlichkeiten, Erträgen und Aufwendungen sowie die Angabe von Eventualforderungen und -verbindlichkeiten bei der Erstellung



---

des Konzernabschlusses nach IFRS sind mit bestimmten Ermessensausübungen, Annahmen und Schätzungen des Managements verbunden.

Unsere Ermessensausübungen, Schätzungen und Annahmen beruhen auf historischen Informationen und Plandaten sowie Informationen über wirtschaftliche Rahmenbedingungen in den Branchen oder Regionen, in denen wir oder unsere Kunden tätig sind. Deren Veränderung könnte sich nachteilig auf unsere Schätzungen auswirken. Wenngleich wir der Auffassung sind, dass unsere Schätzungen über die künftige Entwicklung der zugrunde liegenden Ungewissheiten angemessen sind, können wir nicht garantieren, dass die finanziellen Auswirkungen dieser Angelegenheiten den in unseren Vermögenswerten, Verbindlichkeiten, Erträgen und Aufwendungen berücksichtigten Annahmen entsprechen werden. Die tatsächlichen Ergebnisse können von den ursprünglich von uns getroffenen Schätzungen und Annahmen abweichen.

Die nachfolgende Aufzählung zeigt die Bilanzierungs- und Bewertungsmethoden, die am häufigsten mit Ermessensentscheidungen, Schätzungen und Annahmen unsererseits verbunden und daher für eine Beurteilung unserer Ertragslage entscheidend sind:

- Umsatzrealisierung
- Bewertung von Forderungen aus Lieferungen und Leistungen
- Bilanzierung von anteilsbasierten Vergütungsprogrammen
- Bilanzierung von Ertragsteuern
- Bilanzierung von Unternehmenszusammenschlüssen
- Folgebilanzierung von Geschäfts- oder Firmenwerten und anderen immateriellen Vermögenswerten
- Bilanzierung von rechtlichen Unsicherheiten
- Ansatz von selbst geschaffenen immateriellen Vermögenswerten im Rahmen von Entwicklungsaktivitäten

Diese wesentlichen Bilanzierungs- und Bewertungsmethoden werden von unserem Management gemeinsam mit dem Prüfungsausschuss des Aufsichtsrats regelmäßig erörtert.

### **Umsatzrealisierung**

Wie im Abschnitt „Umsatzrealisierung“ von Textziffer (3b) des Anhangs zum Konzernabschluss erläutert, erfassen wir Umsatzerlöse erst dann, wenn nachweislich ein Vertrag vorliegt, die Lieferung erfolgt ist, die mit dem Eigentum verbundenen

Risiken und Chancen auf den Kunden übertragen wurden, die Höhe der Erlöse verlässlich bestimmt werden kann und der Zahlungseingang für die entsprechende Forderung hinreichend wahrscheinlich ist. Die Beurteilung, ob die Höhe der Erlöse verlässlich bestimmt werden kann oder der Zahlungseingang hinreichend wahrscheinlich ist, ist naturgemäß mit Ermessensausübungen verbunden, da Schätzungen erforderlich sind, ob und in welchem Umfang dem Kunden nachträgliche Zugeständnisse gewährt werden und ob der Kunde die vertraglich vereinbarten Gebühren den Erwartungen entsprechend zahlen wird. Die zeitliche Verteilung sowie die Höhe der realisierten Umsätze können je nach getroffener Einschätzung unterschiedlich ausfallen.

Bei den meisten unserer erlösgenerierenden Vereinbarungen verkaufen wir unseren Kunden mehr als nur eine Softwarelösung oder eine Dienstleistung. Darüber hinaus unterhalten wir mit vielen unserer Kunden laufende Geschäftsbeziehungen und gehen vielfach mit demselben Kunden innerhalb kurzer Zeit mehrere unterschiedliche Transaktionen ein. Daher müssen wir bestimmen,

- welche Vereinbarungen mit einem bestimmten Kunden zusammen als eine Gesamtvereinbarung zu bilanzieren sind,
- welche Teilleistungen einer Vereinbarung separat zu bilanzieren sind und
- wie das Gesamtentgelt für eine Gesamtvereinbarung auf ihre einzelnen Komponenten zu verteilen ist.

Die Bestimmung, ob unterschiedliche Vereinbarungen mit demselben Kunden zusammen als eine Gesamtvereinbarung zu bilanzieren sind, ist mit erheblichen Ermessensausübungen verbunden, da wir beurteilen müssen, ob die Vereinbarungen gemeinsam ausgehandelt wurden oder auf andere Weise miteinander verknüpft sind. Die zeitliche Verteilung sowie die Höhe der realisierten Umsätze können unterschiedlich ausfallen, je nachdem, ob zwei Vereinbarungen separat oder als eine Gesamtvereinbarung bilanziert werden.

Für Software und andere Teilleistungen im Rahmen einer Vereinbarung werden von uns Umsätze nicht separat realisiert, wenn eine der Teilleistungen (zum Beispiel Beratungsleistungen) als wesentlich für die Funktionalität der Software angesehen wird. Die Bestimmung, ob eine wesentliche Leistung gegeben ist, ist mit Ermessensausübungen verbunden. Die zeitliche Verteilung und die Höhe der realisierten Umsätze können davon abhängen, ob eine Leistung als wesentlich angesehen wird,

---

da Softwareerlöse, die ansonsten im Voraus erfasst werden könnten, dann über die Laufzeit realisiert werden müssen, in der die wesentliche Teilleistung erbracht wird.

Außerdem nehmen wir keine separate Umsatzrealisierung für einzelne Teilleistungen vor, wenn wir keine Grundlage für die Aufteilung des Gesamtentgelts auf die einzelnen Komponenten der Vereinbarung haben. Wir sind der Ansicht, dass eine solche Grundlage für eine Aufteilung besteht, wenn wir für jede noch nicht erbrachte Teilleistung der Vereinbarung unternehmensspezifische Standardpreise nachweisen können (siehe weitere Erläuterungen im Abschnitt „Umsatzrealisierung“ in Textziffer (3b) des Anhangs zum Konzernabschluss). Die Bestimmung von unternehmensspezifischen Standardpreisen ist mit Ermessensausübungen verbunden, die die zeitliche Verteilung und die Höhe der realisierten Umsätze beeinflussen könnten, und zwar

- abhängig davon, ob unternehmensspezifische Standardpreise für die noch nicht erbrachten Teilleistungen einer Softwarevereinbarung nachgewiesen werden können,
- abhängig von der Vorgehensweise, mit der unternehmensspezifische Standardpreise nachgewiesen werden.

Außerdem würde sich die Höhe unserer ausgewiesenen Erlöse erheblich ändern, wenn wir für die Umsatzaufteilung eine andere Methode als die Residualmethode anwendeten.

Die Bewertung von Beratungs- und sonstigen Serviceerlösen sowie von Entwicklungsprojekten für kundenindividuelle Software basiert auf der Methode der Teilgewinnrealisierung (Percentage of Completion Method). Im Rahmen dieser Methode müssen wir die voraussichtlichen Umsatzerlöse, die Gesamtkosten zur Fertigstellung des Projekts sowie den Fertigstellungsgrad abschätzen. Annahmen, Schätzungen und Unsicherheiten, die mit der Bestimmung des Fertigstellungsgrads einhergehen, haben Auswirkungen auf die Höhe und die zeitliche Verteilung der realisierten Umsätze und der ausgewiesenen Aufwendungen. Wenn wir nicht über hinreichende Informationen verfügen, um den Leistungsfortschritt zu messen oder die Gesamterlöse und die Gesamtkosten des Vertrags zu schätzen, wird der Erlös nur in Höhe der angefallenen Auftragskosten realisiert. Die Einschätzung, ob wir über hinreichende Informationen zur Messung des Leistungsfortschritts verfügen, ist mit Ermessensausübungen verbunden. Änderungen der Schätzungen bezüglich des erreichten Fertigstellungs-

grads sowie der Vertragserlöse und -aufwendungen werden als kumulierte Anpassung der ausgewiesenen Erlöse des betreffenden Vertrags bilanziert.

### **Bewertung von Forderungen aus Lieferungen und Leistungen**

Wie im Abschnitt „Forderungen aus Lieferungen und Leistungen und sonstige Forderungen“ in Textziffer (3b) beschrieben, berücksichtigen wir Wertminderungen von Forderungen aus Lieferungen und Leistungen durch die Erfassung von Erlösschmälerungen sowie von Wertberichtigungen auf zweifelhafte Forderungen. Dies gilt sowohl für einzelne Forderungen als auch für das gesamte Portfolio. Die Beurteilung der Einbringlichkeit einer Forderung ist naturgemäß mit Ermessensausübungen verbunden und erfordert Annahmen über Forderungsausfälle, die sich erheblich ändern können. Bei der Beurteilung der uns zur Verfügung stehenden Informationen über die finanzielle Situation eines bestimmten Kunden sind Ermessensausübungen erforderlich. So müssen wir beurteilen, ob der Eintritt eines Forderungsausfalls wahrscheinlich ist und die Höhe eines solchen Ausfalls verlässlich geschätzt werden kann, und dass folglich eine Wertberichtigung für den betreffenden Kunden erforderlich ist. Auch die Ermittlung der Pauschalwertberichtigung für die restlichen Forderungen auf der Grundlage der in der Vergangenheit festgestellten Forderungsausfälle ist mit erheblichen Ermessensausübungen verbunden, da die Vergangenheit möglicherweise nicht repräsentativ für die künftige Entwicklung ist, insbesondere vor dem Hintergrund der wirtschaftlichen Rahmenbedingungen infolge der jüngsten weltweiten Finanzkrise. Änderungen unserer Schätzungen in Bezug auf die Wertberichtigung auf zweifelhafte Forderungen könnten wesentliche Auswirkungen auf die in unserem Konzernabschluss ausgewiesenen Vermögenswerte und Aufwendungen haben. Überdies könnte unser Konzernergebnis nachteilig beeinflusst werden, wenn die tatsächlichen Forderungsausfälle wesentlich höher sind als von uns angenommen. Zur Reduzierung dieses Risikos sind unsere Forderungen aus Lieferungen und Leistungen zum Teil durch Kreditversicherungen abgedeckt.

### **Bilanzierung von anteilsbasierten Vergütungsprogrammen**

Wie in Textziffer (28) beschrieben, haben wir sowohl anteilsbasierte Vergütungsprogramme mit Ausgleich durch Eigenkapitalinstrumente als auch anteilsbasierte Vergütungsprogramme mit Barausgleich.

---

Bei der Schätzung der beizulegenden Zeitwerte unserer anteilsbasierten Vergütungen greifen wir auf bestimmte Annahmen zurück, die sich unter anderem auf die erwartete Volatilität des künftigen Aktienkurses und die erwartete Laufzeit der Optionen (diese stellt unsere Schätzung des durchschnittlich verbleibenden Zeitraums bis zur Ausübung oder zum Verfall der Optionen dar) beziehen. Darüber hinaus hängt die Höhe des endgültigen Zahlungsbetrags für diese Vergütungsprogramme vom Kurs der SAP-Aktie an den jeweiligen Ausübungzeitpunkten ab. Diese Annahmen können erhebliche Auswirkungen auf die Bestimmung des beizulegenden Zeitwertes und damit auf die Höhe und die zeitliche Verteilung unserer Aufwendungen für anteilsbasierte Vergütungsprogramme haben. Außerdem hängen die beizulegenden Zeitwerte der im Rahmen unserer im Jahr 2009 aufgelegten Programme STAR Performance Plan 2009 (STAR PP) und SOP Performance Plan 2009 (SOP PP) von der Wertsteigerung im Vergleich zum Technology Peer Group Index (TechPGI) seit dem Tag der Gewährung, der Volatilität und der erwarteten Korrelation zwischen dem Marktpreis des Index und unserem Aktienkurs ab.

Unserer Ansicht nach ist für die Schätzung des beizulegenden Zeitwertes unserer Aktienoptionen die erwartete Volatilität die kritischste Annahme. Für die künftigen Auszahlungen aus diesen Programmen ist der Kurs der SAP-Aktie der wichtigste Faktor. In Bezug auf die im Jahr 2009 eingeführten Programme (SOP PP und STAR PP) sind wir der Auffassung, dass die künftigen Auszahlungen nicht nur vom Kurs der SAP-Aktie, sondern auch von der Anforderung hinsichtlich der Wertsteigerung im Vergleich zum TechPGI erheblich beeinflusst werden. Änderungen dieser Faktoren könnten die anhand des Optionspreismodells ermittelten Schätzungen der beizulegenden Zeitwerte und die künftigen Auszahlungen wesentlich beeinflussen.

### **Bilanzierung von Ertragsteuern**

Aufgrund unserer international ausgerichteten Geschäftstätigkeit erzielen wir Erlöse in zahlreichen Ländern außerhalb Deutschlands und unterliegen dabei den sich ändernden Steuergesetzen der jeweiligen Rechtsordnungen. Unsere gewöhnliche Geschäftstätigkeit umfasst zudem Transaktionen, bei denen die letztendlichen steuerlichen Folgen ungewiss sind, wie zum Beispiel Umsatzaufteilungs- und Kostenumlageverträge zwischen den SAP-Konzerngesellschaften. Darüber hinaus sind die von uns gezahlten Ertragsteuern grundsätzlich Gegenstand von laufenden Betriebsprüfungen in- und ausländischer Steuerbehörden. Daher sind Ermessensausübungen für die

Bestimmung unserer weltweiten Ertragsteuerrückstellungen erforderlich. Wir haben die Entwicklung der ungewissen Steuerfestsetzungen auf der Basis der derzeitigen Steuergesetze und unserer Auslegungen derselben angemessen geschätzt. Diese Ermessensausübungen können wesentliche Auswirkungen auf unsere Ertragsteueraufwendungen, Ertragsteuerrückstellungen und unseren Gewinn nach Steuern haben.

Der Buchwert unserer latenten Steueransprüche wird zu jedem Bilanzstichtag überprüft und in dem Umfang vermindert, in dem es nicht mehr wahrscheinlich ist, dass ein ausreichendes zu versteuerndes Ergebnis zur Verfügung stehen wird, um den latenten Steueranspruch entweder teilweise oder insgesamt zu nutzen. Diese Beurteilung ist mit Ermessensausübungen, Schätzungen und Annahmen des Managements verbunden. Bei der Beurteilung unserer Fähigkeit, unsere latenten Steueransprüche zu nutzen, berücksichtigen wir sämtliche verfügbaren Informationen, einschließlich des in der Vergangenheit erzielten zu versteuernden Einkommens und des prognostizierten zu versteuernden Einkommens in den Perioden, in denen sich die latenten Steueransprüche voraussichtlich realisieren. Bei der Beurteilung des zukünftigen zu versteuernden Einkommens wurden die erwarteten Marktbedingungen sowie andere Tatbestände und Sachverhalte zugrunde gelegt. Jegliche nachteilige Veränderung dieser zugrunde liegenden Tatbestände oder unserer Schätzungen und Annahmen könnte eine Reduzierung des Saldos unserer latenten Steueransprüche erfordern.

Weitere Informationen zu Ertragsteuern finden sich in Textziffer (11).

### **Bilanzierung von Unternehmenszusammenschlüssen**

Im Rahmen der Bilanzierung von Unternehmenszusammenschlüssen sind Ermessensausübungen bei der Beurteilung erforderlich, ob ein immaterieller Vermögenswert identifizierbar ist, das heißt separat vom Geschäfts- oder Firmenwert angesetzt werden kann. Darüber hinaus ist die Schätzung der beizulegenden Zeitwerte der identifizierbaren erworbenen Aktiva und übernommenen Passiva zum Erwerbszeitpunkt mit erheblichen Ermessensausübungen des Managements verbunden. Die erforderlichen Bewertungen basieren auf den zum Erwerbszeitpunkt verfügbaren Informationen sowie auf den nach Ansicht des Managements angemessenen Erwartungen

---

und Annahmen. Diese Ermessensausübungen, Schätzungen und Annahmen können unsere Vermögens-, Finanz- und Ertragslage unter anderem aus folgenden Gründen beeinflussen:

- Die beizulegenden Zeitwerte, die den planmäßig abzuschreibenden Vermögenswerten zugewiesen werden, beeinflussen die Höhe der planmäßigen Abschreibungen, die in den Perioden nach der Akquisition im Betriebsergebnis erfasst werden.
- Spätere nachteilige Veränderungen der geschätzten beizulegenden Zeitwerte der Vermögenswerte könnten zu zusätzlichen Aufwendungen aufgrund von Wertminderungen führen.
- Spätere Veränderungen der geschätzten beizulegenden Zeitwerte von Verbindlichkeiten und Rückstellungen könnten zu zusätzlichen Aufwendungen (bei einer Erhöhung der geschätzten beizulegenden Zeitwerte) oder zusätzlichen Erträgen (bei einer Verringerung der geschätzten beizulegenden Zeitwerte) führen.

#### **Folgebilanzierung von Geschäfts- oder Firmenwerten und anderen immateriellen Vermögenswerten**

Wie im Abschnitt „Immaterielle Vermögenswerte“ in Textziffer (3b) beschrieben, haben alle unsere immateriellen Vermögenswerte, außer Geschäfts- oder Firmenwerte, begrenzte Nutzungsdauern. Deshalb ist der Abschreibungsbetrag für immaterielle Vermögenswerte planmäßig über die jeweilige Nutzungsdauer zu verteilen. Ermessensausübungen sind erforderlich:

- bei der Bestimmung der Nutzungsdauer eines immateriellen Vermögenswertes, da wir hier den Zeitraum schätzen, in dem der immaterielle Vermögenswert uns voraussichtlich einen wirtschaftlichen Nutzen bringt.
- bei der Bestimmung der Abschreibungsmethode, da gemäß IFRS Vermögenswerte linear abzuschreiben sind, es sei denn, wir können den Verbrauch des zukünftigen wirtschaftlichen Nutzens durch SAP verlässlich bestimmen.

Sowohl der Abschreibungszeitraum als auch die Abschreibungsmethode haben Auswirkungen auf die in den einzelnen Perioden erfassten Aufwendungen für planmäßige Abschreibungen.

Bei der Beurteilung von Wertminderungen unserer immateriellen Vermögenswerte und unserer Geschäfts- oder Firmenwerte verwenden wir bestimmte Annahmen und Schätzungen über zukünftige Cashflows, die komplexer Natur sind und mit erheblichen Ermessensausübungen und Annahmen hinsichtlich künftiger Entwicklungen verbunden sind. Sie können durch eine Vielzahl von Faktoren beeinflusst werden, zum Beispiel durch Änderungen unserer Geschäftsstrategie, unserer internen Prognosen und der Schätzungen unserer gewichteten durchschnittlichen Kapitalkosten (Weighted Average Cost of Capital, WACC). Aufgrund dieser Faktoren könnten die tatsächlichen Cashflows und Werte erheblich von den prognostizierten künftigen Cashflows und Werten abweichen, die anhand der abgezinsten Zahlungsströme ermittelt wurden. Wenngleich wir der Auffassung sind, dass unsere in der Vergangenheit getroffenen Annahmen und Schätzungen angemessen sind, könnten abweichende Annahmen und Schätzungen unsere Vermögens-, Finanz- und Ertragslage erheblich beeinträchtigen.

Außerdem können die Ergebnisse der Werthaltigkeitstests für Geschäfts- oder Firmenwerte von der Aufteilung dieser Geschäfts- oder Firmenwerte auf zahlungsmittelgenerierende Einheiten abhängen. Diese Aufteilung ist mit Ermessensausübungen verbunden, da sie von unserer Beurteilung darüber abhängt, welche zahlungsmittelgenerierenden Einheiten voraussichtlich von den Synergien aus dem jeweiligen Unternehmenszusammenschluss profitieren.

Wir haben im Geschäftsjahr 2010 keine Wertminderungsaufwendungen für unsere Geschäfts- oder Firmenwerte sowie keine wesentlichen Wertminderungsaufwendungen für unsere immateriellen Vermögenswerte erfasst. Wenngleich uns derzeit keine Hinweise auf nennenswerte Wertminderungen vorliegen, kann nicht garantiert werden, dass in Zukunft keine Wertminderungsaufwendungen erfasst werden müssen. Weitere Informationen hierzu enthält Textziffer (16).

#### **Bilanzierung von rechtlichen Unsicherheiten**

Wie in Textziffer (24) beschrieben, sind wir derzeit in verschiedene Ansprüche und Gerichtsverfahren involviert. Wir überprüfen den Status jedes wesentlichen Sachverhalts mindestens auf vierteljährlicher Basis und nehmen eine Beurteilung des potenziellen finanziellen und geschäftlichen Risikos in Bezug auf solche Sachverhalte vor. Bei der Bestimmung, ob eine Rückstellung zu bilden ist, sowie bei der Ermittlung des ange-

---

messenen Rückstellungsbetrags sind erhebliche Ermessensausübungen erforderlich, insbesondere bei:

- der Bestimmung, ob eine Verpflichtung besteht,
- der Bestimmung, inwieweit der Abfluss eines wirtschaftlichen Nutzens wahrscheinlich ist,
- der Bestimmung, ob die Höhe der Verpflichtung geschätzt werden kann, und
- der Schätzung der Höhe der Verpflichtung.

Aufgrund der Unsicherheiten in Bezug auf diese Sachverhalte basieren die Rückstellungen auf den bestmöglichen Informationen, die zum jeweiligen Zeitpunkt verfügbar sind.

Am Ende eines Berichtszeitraums nehmen wir eine Neubeurteilung der potenziellen Verpflichtungen aus Ansprüchen und anhängigen Gerichtsverfahren vor und passen unsere jeweiligen Rückstellungen zur Berücksichtigung der gegenwärtig bestmöglichen Schätzung an. Außerdem überwachen und evaluieren wir neue Informationen, die wir nach Ende des jeweiligen Berichtszeitraums, aber vor Freigabe des Konzernabschlusses zur Veröffentlichung erhalten. Dabei soll festgestellt werden, ob diese Informationen zusätzlichen Aufschluss über Sachverhalte geben, die zum Ende des Berichtszeitraums schon bestanden. Diese Änderungen unserer Schätzungen in Bezug auf solche potenziellen Verpflichtungen könnten wesentliche Auswirkungen auf unsere Vermögens- und Ertragslage haben. Die Änderungen von Schätzungen in Bezug auf potenzielle Verbindlichkeiten aus rechtlichen Unsicherheiten hatten keine wesentlichen Auswirkungen auf die Ergebnisse der Jahre 2009 oder 2008. Nach dem Jury-Entscheid in Bezug auf den TomorrowNow-Rechtsstreit im November 2010 haben wir die für diesen Rechtsstreit gebildete Rückstellung wesentlich erhöht. Diese Erhöhung hatte einen wesentlichen Einfluss auf unsere Vermögens-, Finanz- und Ertragslage. Weitere Informationen zu diesem Rechtsstreit finden sich in Textziffer (19b) und (24).

#### **Ansatz von selbst geschaffenen immateriellen Vermögenswerten im Rahmen von Entwicklungsaktivitäten**

Nach IFRS werden während der Entwicklungsphase eines Projekts selbst geschaffene immaterielle Vermögenswerte aktiviert, sofern bestimmte Voraussetzungen erfüllt sind. Diese Voraussetzungen betreffen die technische Realisierbarkeit, die

Absicht, den entwickelten immateriellen Vermögenswert fertigzustellen, die Fähigkeit, ihn zu nutzen oder zu verkaufen, sowie den Nachweis, wie der Vermögenswert einen voraussichtlichen künftigen wirtschaftlichen Nutzen erzeugen wird. Die Herstellungskosten eines bilanzierten selbst geschaffenen immateriellen Vermögenswertes umfassen alle direkt zurechenbaren Kosten, die erforderlich sind, um den Vermögenswert in den vom Management beabsichtigten betriebsbereiten Zustand zu bringen. Dagegen sind sämtliche Ausgaben während der Forschungsphase zum Zeitpunkt ihres Anfalls als Aufwand zu erfassen.

Wir sind der Auffassung, dass die Bestimmung, ob während der Entwicklungsphase eines Projekts selbst geschaffene immaterielle Vermögenswerte als immaterielle Vermögenswerte anzusetzen sind, mit erheblichen Ermessensausübungen verbunden sind, insbesondere in den folgenden Bereichen:

- Die Bestimmung, ob die Aktivitäten als Forschungs- oder als Entwicklungsaktivitäten einzustufen sind
- Die Bestimmung, ob die Ansatzkriterien für immaterielle Vermögenswerte erfüllt sind, erfordert Annahmen über Marktbedingungen, Kundennachfrage und andere Entwicklungen in der Zukunft
- Der Begriff „technische Realisierbarkeit“ ist in den IFRS nicht definiert. Daher erfordert die Beurteilung, ob die Fertigstellung eines Vermögenswertes technisch realisierbar ist, einen unternehmensspezifischen Ansatz, der notwendigerweise mit Ermessensausübungen verbunden ist
- Die Bestimmung, ob der zu entwickelnde Vermögenswert in der Zukunft genutzt oder verkauft werden kann und die Bestimmung, ob aus dieser Nutzung oder diesem Verkauf zukünftige Vorteile entstehen werden
- Die Bestimmung, ob bestimmte Kosten direkt oder indirekt einem immateriellen Vermögenswert zuzurechnen sind und ob Kosten für die Fertigstellung des Entwicklungsprojekts erforderlich sind.

Die Kriterien für den Ansatz von selbst geschaffenen immateriellen Vermögenswerten aus der Softwareentwicklung sind erst kurz vor der Marktreife der entwickelten Produkte vollständig erfüllt. Diese Beurteilung überwachen wir auf regelmäßiger Basis.

### **(3d) Anwendung neuer Rechnungslegungsvorschriften**

Im Juli 2008 veröffentlichte der IASB eine Änderung an IAS 39 *Finanzinstrumente: Ansatz und Bewertung: Geeignete Grundgeschäfte* (IAS 39). Die Änderung legt die Bedingungen für die Designation eines einseitigen Risikos im Rahmen eines Grundgeschäfts sowie für die Designation von Inflationsrisiken als Grundgeschäft in bestimmten Situationen fest. Die Änderung gilt für Sicherungsbeziehungen im Geltungsbereich von IAS 39 und ist auf Geschäftsjahre anzuwenden, die am oder nach dem 1. Juli 2009 beginnen. Eine frühzeitige Anwendung ist zulässig. Die Änderung von IAS 39 hatte keinen wesentlichen Einfluss auf unseren Konzernabschluss.

Im April 2009 veröffentlichte der IASB im Rahmen seines Annual-Improvements-Prozesses Verbesserungen der IFRS – eine Reihe von Änderungen an mehreren International Financial Reporting Standards. Mit diesem Prozess sollen notwendige, aber nicht dringende Änderungen von Standards vorgenommen werden, die nicht Teil eines anderen größeren Projekts sind. Die daraus resultierenden Änderungen sind überwiegend auf Geschäftsjahre anzuwenden, die am oder nach dem 1. Januar 2010 beginnen, wobei eine frühzeitige Anwendung zulässig ist. Diese Änderungen hatten keinen wesentlichen Einfluss auf unseren Konzernabschluss.

### **(3e) Neue, noch nicht in Kraft getretene Rechnungslegungsvorschriften**

Mehrere neue Standards, Änderungen von Standards und Interpretationen gelten noch nicht für das Geschäftsjahr zum 31. Dezember 2010 und wurden daher nicht für die Erstellung des vorliegenden Konzernabschlusses angewendet. Diese haben mit folgenden Ausnahmen voraussichtlich keine Auswirkungen auf den Konzernabschluss:

- IFRS 9 *Finanzinstrumente*, der verpflichtend auf den Konzernabschluss für das Geschäftsjahr 2013 anzuwenden ist, wird sich voraussichtlich auf die Klassifizierung und die Bewertung von finanziellen Vermögenswerten auswirken. Das Ausmaß dieser Auswirkungen haben wir noch nicht festgestellt.
- Änderungen an IFRS 7 *Finanzinstrumente: Angaben – Änderungen zur Verbesserung der Angaben bei Übertragungen von finanziellen Vermögenswerten* (IFRS 7), die verpflichtend auf den Konzernabschluss für das Geschäftsjahr 2012 anzuwenden sind und möglicherweise zusätzliche Angaben erforderlich machen.

### **(4) Unternehmenszusammenschlüsse**

Im Geschäftsjahr 2010 haben wir die folgenden Unternehmen erworben:

#### **Erworbene Unternehmen**

| Erworbene Unternehmen                 | Sektor                                                                                                                                                                                                             | Akquisitionsart              | Erworbene Stimmrechte | Erwerbsdatum |
|---------------------------------------|--------------------------------------------------------------------------------------------------------------------------------------------------------------------------------------------------------------------|------------------------------|-----------------------|--------------|
| Sybase Inc., Dublin, CA (USA)         | Börsennotiertes Unternehmen, spezialisiert auf Datenbanken und Lösungen für mobile Anwendungen                                                                                                                     | Erwerb von Geschäftsanteilen | 100 %                 | 26.07.2010   |
| Technidata AG, Markdorf (Deutschland) | Unternehmen im Privatbesitz, Anbieter von Lösungen für Environment, Health und Safety (EHS), Systemintegration, Gesetzesdaten, EHS-Diensten (Managed Services) sowie Software zur Einhaltung gesetzlicher Auflagen | Erwerb von Geschäftsanteilen | 100 %                 | 27.07.2010   |
| cundus AG, Duisburg (Deutschland)     | Unternehmen im Privatbesitz, von dem wir den Teilbetrieb Disclosure-Management-Lösungen erworben haben                                                                                                             | Erwerb von Vermögenswerten   |                       | 31.12.2010   |

Alle Transaktionen mit Ausnahme des Erwerbs von Sybase waren sowohl einzeln als auch insgesamt betrachtet von untergeordneter Bedeutung für die SAP. Alle erworbenen Unternehmen entwickeln oder verkaufen Software in bestimmten Bereichen, die für uns von strategischem Interesse sind, oder ergänzen unser Serviceportfolio.

Sybase, Inc. (Sybase), mit Hauptsitz in Dublin, Kalifornien, USA, bietet zahlreiche Lösungen, um Kundeninformationen sicher zu verarbeiten und mobil zur Verfügung zu stellen. Dazu gehören festinstallierte und mobile Datenbanken, Middleware, Synchronisation, Software für Verschlüsselung und Endgeräteverwaltung sowie mobile Messaging-Services. Bis zum Zeitpunkt der Übernahme wurden die Aktien von Sybase an der New York Stock Exchange gehandelt (NYSE: SY).

Auf der Grundlage des Erwerbsangebots für Sybase, das wir am 12. Mai 2010 ankündigten, reichte die SAP am 26. Mai 2010 Angebotsunterlagen bei der U.S. Securities and Exchange Commission (SEC) ein. Gemäß den Bedingungen der Übernahmevereinbarung unterbreitete die SAP ein Angebot zum Erwerb aller ausstehenden Aktien von Sybase zum Preis von 65,00 US\$ pro Aktie, was einem Unternehmenswert von 5,9 Mrd. US\$ entspricht. Nach Erhalt der Zustimmung der Wettbewerbsbehörden wurde die Übernahme am 26. Juli 2010 mit dem Erwerb aller angebotenen Aktien (92,1 % der ausstehenden Sybase-Aktien beziehungsweise 91,8 % ermittelt auf vollständig verwässerter Basis) erfolgreich abgeschlossen. Anschließend übte die SAP gemäß geltendem Gesellschaftsrecht ihr Recht zum Erwerb der verbleibenden Aktien aus. Dieser Erwerb wurde am 29. Juli 2010 abgeschlossen. Die verbleibenden Sybase-Aktionäre erhielten eine Barzahlung von 65,00 US\$ pro Aktie ohne Verzinsung und vorbehaltlich möglicher Quellensteuer. Dieser Betrag entspricht der Gegenleistung, die im Rahmen des Übernahmeangebots an Aktionäre gezahlt wurde.

Der Kaufpreis pro Aktie lag 44 % über dem durchschnittlichen Aktienkurs von Sybase in den vergangenen drei Monaten. Die Transaktion wurde aus liquiden Mitteln der SAP und über ein Akquisitionsdarlehen in Höhe von 2,64 Mrd. € finanziert. Weitere Erläuterungen zur Finanzierung der Akquisition sind in Textziffer (18b) enthalten.

Die folgende Tabelle zeigt, in welche Komponenten sich die übertragene Gegenleistung für unsere Unternehmenszusammenschlüsse aufgliedert:

#### Übertragene Gegenleistung

| Mio. €                                                                                                |              | davon Sybase |
|-------------------------------------------------------------------------------------------------------|--------------|--------------|
| Wert der erworbenen Vermögenswerte bzw. ausstehenden Aktien                                           | 4.414        | 4.322        |
| Wert der übernommenen Optionen, Wertsteigerungsrechte und aktienorientierten Mitarbeiterbeteiligungen | 229          | 229          |
| <b>Summe</b>                                                                                          | <b>4.643</b> | <b>4.551</b> |

Die erwerbsbezogenen Nebenkosten für die Unternehmenszusammenschlüsse im Jahr 2010, die wir in den allgemeinen Verwaltungskosten erfasst haben, belaufen sich auf insgesamt 16 Mio. €.

Nachstehende Tabelle zeigt die Aufteilung der beizulegenden Zeitwerte der erworbenen Vermögenswerte und übernommenen Schulden:

## Beizulegender Zeitwert der erworbenen Vermögenswerte und Schulden

| Mio. €                                                                     |              | davon Sybase |
|----------------------------------------------------------------------------|--------------|--------------|
| Zahlungsmittel und Zahlungsmitteläquivalente                               | 446          | 427          |
| Sonstige finanzielle Vermögenswerte                                        | 210          | 209          |
| Forderungen aus Lieferungen und Leistungen und sonstige Forderungen        | 181          | 170          |
| Sonstige nicht finanzielle Vermögenswerte                                  | 24           | 23           |
| Sachanlagen                                                                | 25           | 23           |
| Immaterielle Vermögenswerte                                                | 1.735        | 1.711        |
| davon Kundenbeziehungen und übrige immaterielle Vermögensgegenstände       |              |              |
| Kundenbeziehungen                                                          | 1.091        | 1.088        |
| Markenname                                                                 | 47           | 47           |
| Sonstige immaterielle Vermögenswerte                                       | 28           | 14           |
|                                                                            | 1.166        | 1.149        |
| davon erworbene Technologie                                                |              |              |
| Technologie                                                                | 524          | 518          |
| Nicht abgeschlossene Forschungs- und Entwicklungsprojekte                  | 45           | 44           |
|                                                                            | 569          | 562          |
| davon Software- und Datenbanklizenzen                                      | 11           | 10           |
| Tatsächliche und latente Steueransprüche                                   | 25           | 23           |
| <b>Summe Vermögenswerte</b>                                                | <b>2.646</b> | <b>2.586</b> |
| Verbindlichkeiten aus Lieferungen und Leistungen                           | 106          | 104          |
| Darlehen, finanzielle Verpflichtungen                                      | 480          | 475          |
| Latente und andere Steuerschulden                                          | 607          | 602          |
| Rückstellungen und sonstige nicht finanzielle Verbindlichkeiten            | 138          | 127          |
| davon Rückstellungen für Rechtsstreitigkeiten und ähnliche Verpflichtungen | 16           | 16           |
| Passive Rechnungsabgrenzungsposten                                         | 77           | 75           |
| <b>Summe Schulden</b>                                                      | <b>1.408</b> | <b>1.383</b> |
| <b>Nettovermögen</b>                                                       | <b>1.238</b> | <b>1.203</b> |
| <b>Firmenwert</b>                                                          | <b>3.405</b> | <b>3.348</b> |
| <b>Summe der übertragenen Gegenleistungen</b>                              | <b>4.643</b> | <b>4.551</b> |

Der beizulegende Zeitwert der Kundenbeziehungen umfasst die Kundenbeziehungen für das Kerngeschäft von Sybase sowie das Messaging-Geschäft. Der beizulegende Zeitwert für die erworbene Technologie und nicht abgeschlossene Forschungs- und Entwicklungsprojekte von Sybase berücksichtigt die Vermögenswerte im Zusammenhang mit Innovationen und technologischen Neuerungen, zum Beispiel patentierte und nicht patentierte Technologien, Geschäftsgeheimnisse und Datenbanken. Alle identifizierbaren immateriellen Vermögenswerte wurden separat angesetzt.

Den beizulegenden Zeitwert der Forderungen aus Lieferungen und Leistungen haben wir wie folgt geschätzt:

## Forderungsbewertung

| Mio. €             |     | davon Sybase |
|--------------------|-----|--------------|
| Bruttoforderungen  | 185 | 174          |
| Wertberichtigung   | 4   | 4            |
| Beizulegender Wert | 181 | 170          |

Die in der Eröffnungsbilanz erfassten Werte für latente und andere Steuerschulden, sowie für Rechtsstreitigkeiten und ähnliche Verpflichtungen am Ende der Berichtsperiode sind noch vorläufig und berücksichtigen alle zum Jahresabschluss verfügbare Informationen zu den Verhältnissen am Akquisitionstichtag. Wir werden die Schätzungen während des einjährigen Bewertungszeitraums überprüfen. Sollten sich neue Erkenntnisse über zum Akquisitionstichtag existierende Sachverhalte ergeben, so werden wir unsere Schätzungen entsprechend anpassen. Die erfassten Eventualverbindlichkeiten sind unwesentlich.



Der für unsere Unternehmenszusammenschlüsse im Geschäftsjahr 2010 angesetzte Geschäfts- oder Firmenwert wurde unseren Segmenten Produkt, Beratung und Schulung sowie Sybase wie folgt zugewiesen. Erläuterungen zur Abgrenzung der Segmente finden sich in Textziffer (29).

#### Zuordnung der erworbenen Geschäfts- oder Firmenwerte nach Segmenten

| Mio. €       |              | davon Sybase |
|--------------|--------------|--------------|
| Produkt      | 781          | 730          |
| Beratung     | 67           | 63           |
| Schulung     | 22           | 20           |
| Sybase       | 2.535        | 2.535        |
| <b>Summe</b> | <b>3.405</b> | <b>3.348</b> |

Geschäfts- oder Firmenwerte aus Unternehmenszusammenschlüssen lassen sich hauptsächlich auf die Qualifikationen und Fachkenntnisse der Belegschaft des erworbenen Unternehmens sowie die Synergien aus der Integration des Geschäftsbetriebs der Unternehmen zurückführen. Durch den Erwerb von Sybase kann die SAP ihre Unternehmenssoftware schneller auf mobilen Endgeräten anbieten und die Umsetzung ihrer In-Memory-Strategie beschleunigen. Mit der mobilen Plattform von Sybase können Unternehmen alle Arten von Anwendungen und Daten (SAP und andere) integrieren und über mobile Endgeräte darauf zugreifen.

#### Effekt von Sybase auf das SAP-Ergebnis

| Mio. €              | 2010 wie berichtet | davon Sybase |
|---------------------|--------------------|--------------|
| Umsatz              | 12.464             | 347          |
| Gewinn nach Steuern | 1.813              | 10           |

Hätten wir Sybase zu Beginn des Geschäftsjahres 2010 erworben, beliefen sich unseren Schätzungen zufolge der Pro-Forma-Umsatz auf 12.947 Mio. € und der Pro-Forma-Gewinn nach Steuern auf 1.737 Mio. €. Diese Beträge wurden nach Anwendung der Bilanzierungs- und Bewertungsmethoden der Gesellschaft sowie nach Berücksichtigung der folgenden Faktoren in den Sybase-Ergebnissen ermittelt:

- zusätzliche Abschreibungen, die erforderlich gewesen wären, wenn die Anpassung der beizulegenden Zeitwerte von Sachanlagen und immateriellen Vermögenswerten bereits ab dem 1. Januar 2010 angewendet worden wäre
- Auswirkungen der Verminderungen der abgegrenzten Umsätze aus Wartungsleistungen für das volle Geschäftsjahr
- Fremdkapitalkosten für die Finanzierungshöhe und den Verschuldungsgrad der Gesellschaft nach dem Unternehmenszusammenschluss
- steuerliche Effekte auf die Anpassungen

Diese Pro-Forma-Zahlen wurden ausschließlich zu Vergleichszwecken erstellt. Sie geben weder zuverlässigen Aufschluss über die operativen Ergebnisse, die tatsächlich erzielt worden wären, wenn die Übernahme zu Beginn der Periode erfolgt wäre, noch über zukünftige Ergebnisse.

Unser Umsatz und unser Gewinn nach Steuern sowie unser Pro-Forma-Umsatz und unser Pro-Forma-Gewinn nach Steuern würden sich nicht wesentlich von den in unserem Konzernabschluss ausgewiesenen Beträgen unterscheiden, wenn der Erwerbszeitpunkt für die anderen unwesentlichen Unternehmenszusammenschlüsse der 1. Januar 2010 gewesen wäre.

Informationen zu den Unternehmenszusammenschlüssen des Vorjahres sind dem Anhang zum Konzernabschluss für das Geschäftsjahr 2009 zu entnehmen. Für die Unternehmenszusammenschlüsse des Jahres 2009 haben wir keine Bewertungen angepasst. Infolge einer variablen Kaufpreiszahlung, die niedriger ausfiel als erwartet, haben wir den Geschäfts- oder Firmenwert für einen Unternehmenszusammenschluss aus dem Jahr 2008 um 4 Mio. € reduziert.

## (5) Umsatzerlöse

Detaillierte Informationen zu unseren Methoden zur Umsatzrealisierung finden sich in Textziffer (3).

Die Aufgliederungen der Umsatzerlöse nach Segmenten und Regionen stellen wir in Textziffer (29) dar.

Erlöse aus Fertigungsaufträgen werden in Abhängigkeit vom Projekttyp den Softwareerlösen und den Beratungserlösen zugeordnet. Der Status der nach IAS 11 bilanzierten laufenden Projekte aus Fertigungsaufträgen stellte sich zum Ende der jeweiligen Periode wie folgt dar:

### Laufende Projekte aus Fertigungsaufträgen

| Mio. €                                                                      | 2010 | 2009 | 2008 |
|-----------------------------------------------------------------------------|------|------|------|
| Im Geschäftsjahr erfasste Erlöse                                            | 141  | 109  | 80   |
| Kumulierte Kosten (über den gesamten Projektzeitraum)                       | 163  | 106  | 126  |
| Realisiertes Ergebnis (+Gewinn/–Verlust; über den gesamten Projektzeitraum) | 17   | 14   | –14  |
| Erhaltene Anzahlungen                                                       | 5    | 3    | 0    |
| Fertigungsaufträge mit aktivischem Saldo                                    | 21   | 8    | 18   |
| Fertigungsaufträge mit passivischem Saldo                                   | 35   | 7    | 12   |
| Drohverlustrückstellungen                                                   | 28   | 1    | 2    |

## (6) Restrukturierung

Die Restrukturierungsaufwendungen setzen sich wie folgt zusammen:

### Restrukturierungsaufwendungen

| Mio. €                                                                         | 2010      | 2009       | 2008      |
|--------------------------------------------------------------------------------|-----------|------------|-----------|
| Mitarbeiterbezogene Restrukturierungsaufwendungen                              | 1         | 187        | 23        |
| Aufwendungen für unbenutzte Mietfläche aufgrund von Restrukturierungsmaßnahmen | –4        | 11         | 37        |
| <b>Summe</b>                                                                   | <b>–3</b> | <b>198</b> | <b>60</b> |

Die Restrukturierungsaufwendungen im Geschäftsjahr 2010 in Höhe eines Ertrags von 3 Mio. € beziehen sich auf Änderungen von Schätzungen für in Vorjahren begonnene Restrukturierungsprojekte. Schätzungsanpassungen erfolgten für den 2009 beschlossenen Abbau von 2.983 Stellen durch Kündigungen und Frühverrentung und die damit zusammenhängende Aufgabe von Mietflächen. Darüber hinaus gab es Anpassungen der Rückstellungen für ungenutzte Mietflächen, die 2008 im Rahmen des Restrukturierungsprogramms aufgrund des Erwerbs von Business Objects gebildet wurden. Die Restrukturierungsaufwendungen im Jahr 2008 bezogen sich im Wesentlichen auf das Restrukturierungsprogramm im Zusammenhang mit Business Objects.

Weitere Informationen zur Fortschreibung unserer Restrukturierungsrückstellungen sind in Textziffer (19b) enthalten.

Da die Restrukturierungsaufwendungen im Jahr 2009 wesentlich für unsere Geschäftstätigkeit waren, geben wir diese in Übereinstimmung mit IAS 1.97 in unserer Konzern-Gewinn- und Verlustrechnung separat an. Wenn wir die Restrukturierungsaufwendungen nicht in einer Summe ausweisen würden, ergäbe sich die folgende Verteilung:

## Restrukturierungsaufwendungen

| Mio. €                                            | 2010      | 2009       | 2008      |
|---------------------------------------------------|-----------|------------|-----------|
| Software- und softwarebezogene Servicekosten      | 0         | 17         | 11        |
| Beratungs-, Schulungs- und sonstige Servicekosten | -1        | 60         | 9         |
| Forschungs- und Entwicklungskosten                | -1        | 48         | 15        |
| Vertriebs- und Marketingkosten                    | -1        | 59         | 20        |
| Allgemeine Verwaltungskosten                      | 0         | 14         | 5         |
| <b>Summe</b>                                      | <b>-3</b> | <b>198</b> | <b>60</b> |

## (7) Sonstige betriebliche Erträge, netto

Die sonstigen betrieblichen Erträge, netto, setzen sich wie folgt zusammen:

## Sonstige betriebliche Erträge, netto

| Mio. €                                                         | 2010     | 2009      | 2008      |
|----------------------------------------------------------------|----------|-----------|-----------|
| Veränderung der Wertberichtigungen auf Forderungen             | -3       | 7         | -9        |
| Übrige betriebliche Aufwendungen                               | -2       | -3        | -2        |
| Erträge aus Mieteinnahmen                                      | 5        | 7         | 7         |
| Erträge aus Versicherungsleistungen                            | 0        | 3         | 4         |
| Ergebnis aus der Veräußerung von langfristigen Vermögenswerten | 3        | 11        | 0         |
| Übrige betriebliche Erträge                                    | 6        | 8         | 11        |
| <b>Sonstige betriebliche Erträge, netto</b>                    | <b>9</b> | <b>33</b> | <b>11</b> |

## (8) Aufwendungen für Leistungen an Arbeitnehmer und Zahl der Mitarbeiter

### Aufwendungen für Leistungen an Arbeitnehmer

Die Aufwendungen für Leistungen an Arbeitnehmer setzen sich wie folgt zusammen:

### Aufwendungen für Leistungen an Arbeitnehmer

| Mio. €                                                             | 2010         | 2009         | 2008         |
|--------------------------------------------------------------------|--------------|--------------|--------------|
| Gehälter                                                           | 4.383        | 4.007        | 4.168        |
| Soziale Abgaben                                                    | 607          | 554          | 509          |
| Aufwendungen für Altersversorgung                                  | 149          | 147          | 127          |
| Aufwendungen für aktienorientierte Vergütungsprogramme             | 58           | 54           | 63           |
| Abfindungen                                                        | 63           | 14           | 27           |
| Aufwendungen für mitarbeiterbezogene Restrukturierungsaufwendungen | 1            | 187          | 23           |
| <b>Aufwendungen für Leistungen an Arbeitnehmer</b>                 | <b>5.261</b> | <b>4.963</b> | <b>4.917</b> |

### Zahl der Mitarbeiter

Die Zahl der Mitarbeiter zum 31. Dezember 2010 – umgerechnet in Vollzeitbeschäftigte – ist in nachstehender Tabelle nach Funktionsbereichen der SAP und nach Regionen gegliedert dargestellt:

|                                                      | 31.12.2010         |               |                     |               | 31.12. 2009        |               |                     |               | 31.12. 2008        |               |                     |               |
|------------------------------------------------------|--------------------|---------------|---------------------|---------------|--------------------|---------------|---------------------|---------------|--------------------|---------------|---------------------|---------------|
|                                                      | EMEA <sup>1)</sup> | Amerika       | Asien-Pazifik-Japan | Gesamt        | EMEA <sup>1)</sup> | Amerika       | Asien-Pazifik-Japan | Gesamt        | EMEA <sup>1)</sup> | Amerika       | Asien-Pazifik-Japan | Gesamt        |
| Software- und softwarebezogene Services              | 3.804              | 1.827         | 2.254               | 7.885         | 3.227              | 1.276         | 1.919               | 6.422         | 3.269              | 1.306         | 1.891               | 6.466         |
| Beratungs-, Schulungs- und sonstige Services         | 6.787              | 3.955         | 2.410               | 13.152        | 6.635              | 3.473         | 2.240               | 12.348        | 7.326              | 4.142         | 2.583               | 14.051        |
| Forschung und Entwicklung                            | 8.617              | 3.154         | 4.113               | 15.884        | 8.525              | 2.534         | 3.755               | 14.814        | 8.687              | 2.767         | 4.094               | 15.548        |
| Vertrieb und Marketing                               | 4.593              | 4.214         | 2.180               | 10.987        | 4.202              | 3.559         | 1.752               | 9.513         | 4.645              | 4.014         | 2.042               | 10.701        |
| Allgemeine Verwaltung                                | 2.053              | 1.005         | 518                 | 3.576         | 1.919              | 724           | 408                 | 3.051         | 1.996              | 788           | 459                 | 3.243         |
| Infrastruktur                                        | 1.135              | 628           | 266                 | 2.029         | 854                | 408           | 174                 | 1.436         | 905                | 445           | 185                 | 1.535         |
| <b>SAP-Konzern</b>                                   | <b>26.989</b>      | <b>14.783</b> | <b>11.741</b>       | <b>53.513</b> | <b>25.362</b>      | <b>11.974</b> | <b>10.248</b>       | <b>47.584</b> | <b>26.828</b>      | <b>13.462</b> | <b>11.254</b>       | <b>51.544</b> |
| davon Sybase                                         | 813                | 1.866         | 1.047               | 3.726         |                    |               |                     |               |                    |               |                     |               |
| <b>SAP-Konzern (Durchschnitt der Monatsendwerte)</b> | <b>25.929</b>      | <b>13.164</b> | <b>10.877</b>       | <b>49.970</b> | <b>25.927</b>      | <b>12.288</b> | <b>10.554</b>       | <b>48.769</b> | <b>26.561</b>      | <b>13.872</b> | <b>11.128</b>       | <b>51.561</b> |

<sup>1)</sup> Europa, Naher Osten, Afrika

### Aufteilung der Aufwendungen aus anteilsbasierten Vergütungsprogrammen

Die Aufteilung der Aufwendungen aus anteilsbasierten Vergütungsprogrammen stellt sich wie folgt dar:

#### Aktienorientierte Vergütungen

| Mio. €                                                                               | 2010      | 2009      | 2008      |
|--------------------------------------------------------------------------------------|-----------|-----------|-----------|
| Software- und softwarebezogene Servicekosten                                         | 4         | 5         | 6         |
| Beratungs- und sonstige Servicekosten                                                | 9         | 9         | 12        |
| Forschungs- und Entwicklungskosten                                                   | 19        | 18        | 18        |
| Vertriebs- und Marketingkosten                                                       | 16        | 12        | 15        |
| Allgemeine Verwaltungskosten                                                         | 10        | 10        | 12        |
| <b>Aktienorientierte Vergütung</b>                                                   | <b>58</b> | <b>54</b> | <b>63</b> |
| davon aktienbasierte Vergütungsprogramme mit Barausgleich                            | 29        | 49        | 59        |
| davon aktienbasierte Vergütungsprogramme mit Ausgleich durch Eigenkapitalinstrumente | 29        | 5         | 4         |

Weitere Einzelheiten zu unseren anteilsbasierten Vergütungsprogrammen sind in Textziffer (28) aufgeführt.

### (9) Sonstige Aufwendungen, netto

Die sonstigen Aufwendungen, netto, setzen sich wie folgt zusammen:

#### Sonstige Aufwendungen, netto

| Mio. €                               | 2010        | 2009       | 2008       |
|--------------------------------------|-------------|------------|------------|
| Währungsumrechnungsergebnis, netto   | -175        | -73        | 2          |
| davon realisierte Gewinne/Verluste   | -317        | 89         | -32        |
| davon unrealisierte Gewinne/Verluste | 199         | -168       | 66         |
| davon eingebettete Derivative        | -57         | 6          | -32        |
| Übrige Erträge                       | 3           | 8          | 5          |
| Übrige Aufwendungen                  | -14         | -8         | -34        |
| <b>Sonstige Aufwendungen, netto</b>  | <b>-186</b> | <b>-73</b> | <b>-27</b> |

## (10) Finanzergebnis, netto

Das Finanzergebnis, netto, setzt sich wie folgt zusammen:

### Finanzergebnis, netto

| Mio. €                                                                       | 2010        | 2009        | 2008        |
|------------------------------------------------------------------------------|-------------|-------------|-------------|
| <b>Finanzierungserträge</b>                                                  |             |             |             |
| <b>Zinserträge aus</b>                                                       |             |             |             |
| zur Veräußerung verfügbaren finanziellen Vermögenswerten (Schuldtitel)       | 0           | 0           | 5           |
| Ausleihungen und sonstigen finanziellen Forderungen                          | 34          | 35          | 70          |
| Derivaten                                                                    | 25          | 0           | 7           |
| <b>Gewinne aus</b>                                                           |             |             |             |
| zur Veräußerung verfügbaren finanziellen Vermögenswerten (Schuldtitel)       | 2           | 0           | 0           |
| zur Veräußerung verfügbaren finanziellen Vermögenswerten (Eigenkapitaltitel) | 9           | 1           | 15          |
| <b>Beteiligungsergebnis aus assoziierten Unternehmen</b>                     | 3           | 1           | 1           |
| <b>Finanzierungserträge</b>                                                  | <b>73</b>   | <b>37</b>   | <b>98</b>   |
| <b>Finanzierungsaufwendungen</b>                                             |             |             |             |
| <b>Zinsaufwendungen aus</b>                                                  |             |             |             |
| finanziellen Verbindlichkeiten zu fortgeführten Anschaffungskosten           | -77         | -63         | -131        |
| Derivaten                                                                    | -31         | -38         | 0           |
| TomorrowNow                                                                  | -12         | 0           | 0           |
| <b>Verluste aus</b>                                                          |             |             |             |
| zur Veräußerung verfügbaren finanziellen Vermögenswerten (Schuldtitel)       | 0           | 0           | -2          |
| zur Veräußerung verfügbaren finanziellen Vermögenswerten (Eigenkapitaltitel) | -1          | -1          | 0           |
| <b>Wertminderungsverluste aus</b>                                            |             |             |             |
| zur Veräußerung verfügbaren finanziellen Vermögenswerten (Eigenkapitaltitel) | -3          | -11         | -13         |
| Ausleihungen und sonstigen finanziellen Forderungen                          | 0           | 0           | -1          |
| <b>Gebühren für Kreditlinien</b>                                             | -16         | -4          | -1          |
| <b>Finanzierungsaufwendungen</b>                                             | <b>-140</b> | <b>-117</b> | <b>-148</b> |
| <b>Finanzergebnis, netto</b>                                                 | <b>-67</b>  | <b>-80</b>  | <b>-50</b>  |

## (11) Ertragsteuern

Der Ertragsteueraufwand des jeweiligen Geschäftsjahres setzte sich wie folgt zusammen:

### Ertragsteueraufwand

| Mio. €                                                                                                                                         | 2010        | 2009       | 2008       |
|------------------------------------------------------------------------------------------------------------------------------------------------|-------------|------------|------------|
| Laufender Steueraufwand – Inland                                                                                                               | 413         | 344        | 404        |
| Laufender Steueraufwand – Ausland                                                                                                              | 459         | 380        | 463        |
|                                                                                                                                                | <b>872</b>  | <b>724</b> | <b>867</b> |
| Latenter Steueraufwand/-ertrag – Inland                                                                                                        | 23          | –16        | 11         |
| Latenter Steuerertrag – Ausland                                                                                                                | –370        | –23        | –102       |
|                                                                                                                                                | <b>–347</b> | <b>–39</b> | <b>–91</b> |
| <b>Ertragsteueraufwand</b>                                                                                                                     | <b>525</b>  | <b>685</b> | <b>776</b> |
| davon laufender Steueraufwand für das laufende Jahr                                                                                            | 862         | 783        | 853        |
| davon periodenfremder laufender Steueraufwand/-ertrag                                                                                          | 10          | –59        | 14         |
| davon latente Steuern aus der Entstehung und Umkehrung temporärer Differenzen                                                                  | –388        | –51        | –107       |
| davon latente Steuern aus noch nicht genutzten steuerlichen Verlusten und Steuergutschriften (Forschung und Entwicklung, ausländische Steuern) | 41          | 12         | 16         |

Der Gewinn vor Steuern teilte sich wie folgt auf das In- und Ausland auf:

### Gewinn vor Steuern

| Mio. €  | 2010         | 2009         | 2008         |
|---------|--------------|--------------|--------------|
| Inland  | 2.009        | 1.324        | 1.636        |
| Ausland | 329          | 1.111        | 988          |
|         | <b>2.338</b> | <b>2.435</b> | <b>2.624</b> |

In der folgenden Tabelle wird eine Überleitung des erwarteten Steueraufwands, ausgehend vom deutschen kombinierten Ertragsteuersatz der Gesellschaft von derzeit 26,29 % (2009: 26,21 %; 2008: 26,33 %), zur tatsächlichen Steuerbelastung vorgenommen. Unser kombinierter Ertragsteuersatz für 2010 setzt sich zusammen aus Körperschaftsteuer in Höhe von 15,00 % (2009: 15,00 %; 2008: 15,00 %) zuzüglich 5,5 % Solidaritätszuschlag hierauf sowie Gewerbesteuer in Höhe von 10,46 % (2009: 10,38 %; 2008: 10,5 %).

### Überleitung des Steueraufwands

| Mio. €                                                                                                                                | 2010          | 2009          | 2008          |
|---------------------------------------------------------------------------------------------------------------------------------------|---------------|---------------|---------------|
| <b>Ergebnis vor Steuern</b>                                                                                                           | <b>2.338</b>  | <b>2.435</b>  | <b>2.624</b>  |
| Erwartete Ertragsteuern                                                                                                               | 615           | 638           | 691           |
| Abweichung zu ausländischen Steuersätzen                                                                                              | –108          | 57            | 49            |
| Steuer auf nicht abziehbare Aufwendungen                                                                                              | 106           | 94            | 56            |
| Steueraufwand/-ertrag für Vorjahre                                                                                                    | –18           | –45           | 14            |
| Effekt aus steuerfreien Einkünften                                                                                                    | –56           | –52           | –49           |
| Effekt aus Steuergutschriften (Forschung und Entwicklung, ausländische Steuern)                                                       | –53           | –20           | –14           |
| Veränderung in der Realisierbarkeit latenter Steueransprüche und Steuergutschriften (Forschung und Entwicklung, ausländische Steuern) | 11            | –8            | 7             |
| Sonstiges                                                                                                                             | 28            | 21            | 22            |
| <b>Ausgewiesener Ertragsteueraufwand</b>                                                                                              | <b>525</b>    | <b>685</b>    | <b>776</b>    |
| <b>Effektive Steuerquote</b>                                                                                                          | <b>22,5 %</b> | <b>28,1 %</b> | <b>29,6 %</b> |

Die folgende Tabelle zeigt die latenten Steueransprüche und -schulden vor Saldierung für die einzelnen Bilanzposten jeweils zum 31. Dezember:

#### Latente Steueransprüche und -schulden

| Mio. €                                                               | 2010         | 2009       |
|----------------------------------------------------------------------|--------------|------------|
| <b>Latente Steueransprüche</b>                                       |              |            |
| Immaterielle Vermögenswerte                                          | 69           | 69         |
| Sachanlagen                                                          | 15           | 15         |
| Sonstige finanzielle Vermögenswerte                                  | 12           | 13         |
| Forderungen aus Lieferungen und Leistungen und sonstige Forderungen  | 30           | 120        |
| Verlustvorträge                                                      | 55           | 29         |
| Pensionsrückstellungen                                               | 97           | 37         |
| Anteilsbasierte Vergütungsprogramme                                  | 37           | 23         |
| Sonstige Rückstellungen                                              | 548          | 171        |
| Passive Rechnungsabgrenzungsposten                                   | 41           | 30         |
| Steuergutschriften (Forschung und Entwicklung, ausländische Steuern) | 24           | 4          |
| Sonstige                                                             | 112          | 74         |
| <b>Latente Steueransprüche</b>                                       | <b>1.040</b> | <b>585</b> |
| <b>Latente Steuerschulden</b>                                        |              |            |
| Immaterielle Vermögenswerte                                          | 512          | 178        |
| Sachanlagen                                                          | 47           | 34         |
| Sonstige finanzielle Vermögenswerte                                  | 226          | 36         |
| Forderungen aus Lieferungen und Leistungen und sonstige Forderungen  | 21           | 38         |
| Pensionsrückstellungen                                               | 37           | 59         |
| Sonstige Rückstellungen                                              | 3            | 5          |
| Passive Rechnungsabgrenzungsposten                                   | 5            | 0          |
| Sonstige                                                             | 31           | 27         |
| <b>Latente Steuerschulden</b>                                        | <b>882</b>   | <b>377</b> |
| <b>Latente Steueransprüche, netto</b>                                | <b>158</b>   | <b>208</b> |

beizulegenden Zeitwerte der erworbenen Aktiva und übernommenen Passiva, insbesondere bei den immateriellen und den sonstigen finanziellen Vermögenswerten, erheblich von den jeweiligen steuerlichen Werten abweichen.

Die im Jahr 2010 geleisteten Ertragsteuerzahlungen wurden durch den TomorrowNow-Rechtsstreit um 1 Mio. € (2009: 2 Mio. €; 2008: 5 Mio. €) gemindert.

Für die folgenden Posten wurden in den Geschäftsjahren 2010, 2009 und 2008 keine latenten Steueransprüche angesetzt, da es nicht wahrscheinlich ist, dass ein ausreichendes zu versteuerndes Ergebnis zur Verfügung stehen wird, um diese Ansprüche zu realisieren.

#### Posten, für die keine latenten Steueransprüche angesetzt wurden

| Mio. €                                                                      | 2010      | 2009       | 2008       |
|-----------------------------------------------------------------------------|-----------|------------|------------|
| <b>Steuerliche Verlustvorträge</b>                                          |           |            |            |
| Unverfallbar                                                                | 7         | 8          | 8          |
| Verfall im Folgejahr                                                        | 5         | 1          | 4          |
| Verfall nach dem Folgejahr                                                  | 86        | 138        | 176        |
| <b>Noch nicht genutzte steuerliche Verlustvorträge</b>                      | <b>98</b> | <b>147</b> | <b>188</b> |
| <b>Steuergutschriften (Forschung und Entwicklung, ausländische Steuern)</b> |           |            |            |
| Unverfallbar                                                                | 21        | 0          | 0          |
| Verfall nach dem Folgejahr                                                  | 2         | 4          | 1          |
| <b>Noch nicht genutzte Steuergutschriften</b>                               | <b>23</b> | <b>4</b>   | <b>1</b>   |

Die Erhöhung der latenten Steueransprüche ist im Wesentlichen auf den Steuereffekt aus der Rückstellung für den TomorrowNow-Rechtsstreit zurückzuführen. Die Zunahme der latenten Steuerschulden resultiert hauptsächlich aus unseren Unternehmenszusammenschlüssen 2010, da die

Zum 31. Dezember 2010 verfügten wir über in Tochterunternehmen thesaurierte Gewinne in Höhe von rund 4,56 Mrd. € (2009: 3,60 Mrd. €), die dauerhaft investiert bleiben sollen und für die deshalb keine latenten Steuerschulden gebildet wurden. Aus Praktikabilitätsgründen wurde auf die mit Unsicherheiten behaftete Berechnung von Steuereffekten hierauf verzichtet.

Die für das Geschäftsjahr 2010 vorgeschlagene Dividende in Höhe von 0,60 € je Aktie wird keine ertragsteuerlichen Konsequenzen für die SAP AG haben.

Unter Berücksichtigung der Steuern, die wir gegen Kapitalrücklage und sonstige Eigenkapitalposten verrechnet haben, setzen sich die Ertragsteuern für die Geschäftsjahre 2010, 2009 und 2008 wie folgt zusammen:

#### Gesamtbetrag der Ertragsteuern

| Mio. €                                                                                        | 2010       | 2009       | 2008       |
|-----------------------------------------------------------------------------------------------|------------|------------|------------|
| Ertragsteueraufwand aus laufender Geschäftstätigkeit                                          | 525        | 685        | 776        |
| In der Kapitalrücklage erfasste Ertragsteuern                                                 | -1         | 0          | -13        |
| In den sonstigen Eigenkapitalposten erfasste Ertragsteuern:                                   |            |            |            |
| – Unrealisierte Gewinne/Verluste aus zur Veräußerung verfügbaren finanziellen Vermögenswerten | 0          | 1          | 0          |
| – Gewinne/Verluste aus Cashflow-Hedges                                                        | -5         | 11         | -17        |
| – Versicherungsmathematische Gewinne/Verluste aus leistungsorientierten Plänen                | -18        | 0          | -22        |
| – Währungseffekte                                                                             | 5          | 0          | 0          |
|                                                                                               | <b>506</b> | <b>697</b> | <b>724</b> |

Die in der Kapitalrücklage gebuchten Steuern vom Einkommen und vom Ertrag beziehen sich auf unsere anteilsbasierten Vergütungspläne mit Ausgleich durch Eigenkapitalinstrumente.

#### (12) Ergebnis je Aktie

Bei der Ermittlung der verwässerten Ergebnis-je-Aktie-Kennzahlen berücksichtigen wir unsere im Rahmen von anteilsbasierten Vergütungsprogrammen ausgegebenen Wandelschuldverschreibungen, Aktienoptionen und Bonusaktien aus dem Share Matching Plan 2010 (weitere Erläuterungen siehe Textziffer (28)), sofern sie einen Verwässerungseffekt haben. Einige Wandelschuldverschreibungen und Aktienoptionen, die im Zusammenhang mit dem Long Term Incentive Plan der SAP AG 2000 (LTI-Plan 2000) und dem SAP Stock Option Plan 2002 (SAP SOP 2002) gewährt wurden, haben wir nicht in die Berechnung des Ergebnisses je Aktie (verwässert) einbezogen, da sie der Verwässerung entgegenwirken. Wenn solche Wandelschuldverschreibungen und Aktienoptionen 2010 gewandelt oder ausgeübt worden wären, entsprächen sie 21,2 Millionen Stammaktien (2009: 35,8 Millionen Stammaktien; 2008: 43,6 Millionen Stammaktien). Die Anzahl der ausstehenden Wandelschuldverschreibungen und Aktienoptionen ist in Textziffer (28) aufgeführt.

Das Ergebnis je Aktie wurde wie folgt ermittelt:

#### Ergebnis je Aktie

| Mio. €                                                                 | 2010        | 2009        | 2008        |
|------------------------------------------------------------------------|-------------|-------------|-------------|
| Den Gesellschaftern der SAP AG zustehender Gewinn nach Steuern         | 1.811       | 1.748       | 1.847       |
| Grundkapital                                                           | 1.226       | 1.226       | 1.239       |
| Eigene Anteile                                                         | -38         | -38         | -49         |
| Gewichtete durchschnittliche Aktienanzahl – unverwässert <sup>1)</sup> | 1.188       | 1.188       | 1.190       |
| Verwässerungseffekt aus Aktienoptionen <sup>1)</sup>                   | 1           | 1           | 1           |
| Gewichtete durchschnittliche Aktienanzahl – verwässert <sup>1)</sup>   | 1.189       | 1.189       | 1.191       |
| <b>Ergebnis je Aktie – unverwässert in €</b>                           | <b>1,52</b> | <b>1,47</b> | <b>1,55</b> |
| <b>Ergebnis je Aktie – verwässert in €</b>                             | <b>1,52</b> | <b>1,47</b> | <b>1,55</b> |

<sup>1)</sup> in Millionen Stück



### (13) Sonstige finanzielle Vermögenswerte

#### Sonstige finanzielle Vermögenswerte

| Mio. €                                                | 2010        |             |            | 2009        |             |            |
|-------------------------------------------------------|-------------|-------------|------------|-------------|-------------|------------|
|                                                       | Kurzfristig | Langfristig | Gesamt     | Kurzfristig | Langfristig | Gesamt     |
| Ausleihungen und sonstige finanzielle Forderungen     | 42          | 328         | 370        | 422         | 168         | 590        |
| <i>Schuldinstrumente</i>                              | 0           | 0           | 0          | 0           | 0           | 0          |
| <i>Eigenkapitalinstrumente</i>                        | 0           | 107         | 107        | 0           | 87          | 87         |
| Zur Veräußerung verfügbare finanzielle Vermögenswerte | 0           | 107         | 107        | 0           | 87          | 87         |
| Derivate                                              | 116         | 0           | 116        | 64          | 2           | 66         |
| Anteile an assoziierten Unternehmen                   | 0           | 40          | 40         | 0           | 27          | 27         |
| <b>Summe</b>                                          | <b>158</b>  | <b>475</b>  | <b>633</b> | <b>486</b>  | <b>284</b>  | <b>770</b> |

#### **Ausleihungen und sonstige finanzielle Forderungen**

Ausleihungen und sonstige finanzielle Forderungen bestehen im Wesentlichen aus Ansprüchen aus Rückdeckungsversicherungen in Verbindung mit Pensionsvermögen (Altersteilzeit und Arbeitszeitkonten), für die die korrespondierende Rückstellung unter den personalbezogenen Verpflichtungen erläutert wird (siehe Textziffer (20b)), Festgeldern, anderen Forderungen sowie Darlehen an Mitarbeiter. Die Mehrheit unserer Ausleihungen und sonstigen finanziellen Forderungen konzentriert sich auf Deutschland.

Zum 31. Dezember 2010 gab es keine Ausleihungen und sonstigen finanziellen Forderungen, die überfällig, aber nicht wertgemindert waren. Zum Berichtszeitpunkt liegen uns keine Anhaltspunkte für eine Wertminderung von Ausleihungen und anderen finanziellen Forderungen vor, die nicht überfällig und nicht wertgemindert sind. Weitere grundlegende Informationen über Finanzrisiken und die Art des Risikos sind in Textziffer (25) dargestellt.

#### **Zur Veräußerung verfügbare finanzielle Vermögenswerte**

Zur Veräußerung verfügbare finanzielle Vermögenswerte lauten auf die folgenden Währungen:

| Mio. €    | 2010       | 2009      |
|-----------|------------|-----------|
| Euro      | 34         | 34        |
| US-Dollar | 71         | 52        |
| Sonstige  | 2          | 1         |
|           | <b>107</b> | <b>87</b> |

Unsere Eigenkapitalinstrumente umfassen Anteile an nicht börsennotierten Unternehmen, deren beizulegender Zeitwert nicht verlässlich bestimmt werden kann. Diese Eigenkapitalinstrumente hatten zum 31. Dezember 2010 einen Buchwert von 79 Mio. € (2009: 62 Mio. €). Im Geschäftsjahr 2010 erfassten wir Wertminderungsaufwendungen in Höhe von 3 Mio. € (2009: 11 Mio. €; 2008: 12 Mio. €) für solche zu Anschaffungskosten bewerteten Eigenkapitalinstrumente.

Zum 31. Dezember 2010 beabsichtigten wir keinen baldigen Verkauf weiterer nicht börsennotierter Beteiligungen. Erläuterungen zur Bewertung unserer nicht börsennotierten Beteiligungen zum beizulegenden Zeitwert finden sich in Textziffer (27).

#### **Derivate**

Detaillierte Informationen zu unseren derivativen Finanzinstrumenten finden sich in Textziffer (26).

### **(14) Forderungen aus Lieferungen und Leistungen und sonstige Forderungen**

#### **Forderungen aus Lieferungen und Leistungen und sonstige Forderungen**

| Mio. €                                     | 2010         |             |              | 2009         |             |              |
|--------------------------------------------|--------------|-------------|--------------|--------------|-------------|--------------|
|                                            | Kurzfristig  | Langfristig | Gesamt       | Kurzfristig  | Langfristig | Gesamt       |
| Forderungen aus Lieferungen und Leistungen | 3.031        | 0           | 3.031        | 2.507        | 1           | 2.508        |
| Sonstige Forderungen                       | 68           | 78          | 146          | 39           | 51          | 90           |
| <b>Summe</b>                               | <b>3.099</b> | <b>78</b>   | <b>3.177</b> | <b>2.546</b> | <b>52</b>   | <b>2.598</b> |

Die Buchwerte unserer Forderungen aus Lieferungen und Leistungen ergaben sich zum 31. Dezember jeweils wie folgt:

#### **Buchwerte der Forderungen aus Lieferungen und Leistungen**

| Mio. €                                                           | 2010         | 2009         |
|------------------------------------------------------------------|--------------|--------------|
| Bruttobuchwert                                                   | 3.187        | 2.698        |
| Wertberichtigungen wegen Erlösschmälerungen                      | -112         | -142         |
| Aufwandswirksame Wertberichtigungen auf zweifelhafte Forderungen | -44          | -48          |
| <b>Nettobuchwert Forderungen aus Lieferungen und Leistungen</b>  | <b>3.031</b> | <b>2.508</b> |

In den Wertberichtigungen für zweifelhafte Forderungen ergaben sich folgende Veränderungen:

#### Veränderung der aufwandswirksamen Wertberichtigungen auf zweifelhafte Forderungen

| Mio. €                                      | 2010      | 2009      |
|---------------------------------------------|-----------|-----------|
| Saldo 1.1.                                  | 48        | 51        |
| Verbrauch                                   | 0         | -5        |
| Zuführung                                   | 9         | 11        |
| Auflösung                                   | -14       | -11       |
| Währungsdifferenzen und sonstige Änderungen | 1         | 2         |
| <b>Saldo 31.12.</b>                         | <b>44</b> | <b>48</b> |

Aufgrund der breiten Kundenbasis und der Streuung über eine Vielzahl von Branchen und Ländern weltweit schätzen wir die Gefahr der Konzentration des Geschäfts und ein daraus resultierendes Ausfallrisiko als gering ein.

Die Fälligkeitsanalyse unserer Forderungen stellt sich zum 31. Dezember des entsprechenden Geschäftsjahres wie folgt dar:

#### Fälligkeitsanalyse Forderungen aus Lieferungen und Leistungen

| Mio. €                                                                         | 2010         | 2009         |
|--------------------------------------------------------------------------------|--------------|--------------|
| Nicht überfällig, nicht einzeln wertberichtigt                                 | 2.390        | 1.861        |
| <b>Überfällig, aber nicht einzeln wertberichtigt</b>                           |              |              |
| 1 bis 30 Tage überfällig                                                       | 278          | 264          |
| 31 bis 120 Tage überfällig                                                     | 206          | 156          |
| 121 bis 365 Tage überfällig                                                    | 60           | 67           |
| Über 365 Tage überfällig                                                       | 42           | 60           |
| <b>Summe der überfälligen, aber nicht einzeln wertberichtigten Forderungen</b> | <b>586</b>   | <b>547</b>   |
| Einzeln wertberichtigt, nach Wertberichtigung                                  | 55           | 100          |
| <b>Nettobuchwert der Forderungen aus Lieferungen und Leistungen</b>            | <b>3.031</b> | <b>2.508</b> |

Wir sind der Ansicht, dass die erfassten Wertberichtigungen dem mit den Forderungen aus Lieferungen und Leistungen verbundenen Kreditrisiko ausreichend Rechnung tragen.

Weitere Informationen über Finanzrisiken und deren Steuerung enthalten die Textziffern (25) und (26).

### (15) Sonstige nicht finanzielle Vermögenswerte

#### Sonstige nicht finanzielle Vermögenswerte

| Mio. €                                           | 2010        |             |            | 2009        |             |            |
|--------------------------------------------------|-------------|-------------|------------|-------------|-------------|------------|
|                                                  | Kurzfristig | Langfristig | Gesamt     | Kurzfristig | Langfristig | Gesamt     |
| Aktive Rechnungsabgrenzungsposten                | 101         | 31          | 132        | 91          | 35          | 126        |
| Forderungen aus sonstigen Steuererstattungen     | 58          | 0           | 58         | 35          | 0           | 35         |
| Geleistete Anzahlung auf sonstige Vermögenswerte | 8           | 0           | 8          | 8           | 0           | 8          |
| Vorräte                                          | 12          | 0           | 12         | 11          | 0           | 11         |
| Übrige sonstige Vermögenswerte                   | 2           | 0           | 2          | 2           | 0           | 2          |
| <b>Summe</b>                                     | <b>181</b>  | <b>31</b>   | <b>212</b> | <b>147</b>  | <b>35</b>   | <b>182</b> |

Die aktiven Rechnungsabgrenzungsposten umfassen im Wesentlichen geleistete Vorauszahlungen im Rahmen von Miet-, Pacht-, Support- und Lizenzverträgen. Die Auflösung und Erfassung als Aufwand erfolgt in zukünftigen Perioden.

## (16) Geschäfts- oder Firmenwert und immaterielle Vermögenswerte

### Geschäfts- oder Firmenwert und immaterielle Vermögenswerte

| Mio. €                                 | Geschäfts- oder Firmenwert | Software- und Datenbanklizenzen | Erworbenere Technologie/ Nicht abgeschlossene Entwicklungsprojekte | Kundenbeziehungen und übrige immaterielle Vermögenswerte | Gesamt        |
|----------------------------------------|----------------------------|---------------------------------|--------------------------------------------------------------------|----------------------------------------------------------|---------------|
| <b>Historische Anschaffungskosten</b>  |                            |                                 |                                                                    |                                                          |               |
| 1. Januar 2009                         | 5.070                      | 323                             | 646                                                                | 763                                                      | 6.802         |
| Währungsdifferenzen                    | -23                        | 1                               | -6                                                                 | -4                                                       | -32           |
| Zugänge aus Akquisitionen              | 41                         | 0                               | 29                                                                 | 3                                                        | 73            |
| Sonstige Zugänge                       | 0                          | 19                              | 0                                                                  | 0                                                        | 19            |
| Abgänge                                | 0                          | -9                              | -6                                                                 | -4                                                       | -19           |
| <b>31. Dezember 2009</b>               | <b>5.088</b>               | <b>334</b>                      | <b>663</b>                                                         | <b>758</b>                                               | <b>6.843</b>  |
| Währungsdifferenzen                    | 38                         | 3                               | 7                                                                  | -5                                                       | 43            |
| Zugänge aus Akquisitionen              | 3.401                      | 11                              | 569                                                                | 1.155                                                    | 5.136         |
| Sonstige Zugänge                       | 0                          | 79                              | 0                                                                  | 0                                                        | 79            |
| Abgänge                                | 0                          | -10                             | 1                                                                  | -5                                                       | -14           |
| <b>31. Dezember 2010</b>               | <b>8.527</b>               | <b>417</b>                      | <b>1.240</b>                                                       | <b>1.903</b>                                             | <b>12.087</b> |
| <b>Kumulierte Abschreibungen</b>       |                            |                                 |                                                                    |                                                          |               |
| 1. Januar 2009                         | 95                         | 191                             | 250                                                                | 151                                                      | 687           |
| Währungsdifferenzen                    | -1                         | 1                               | -3                                                                 | -2                                                       | -5            |
| Zugänge laufende Abschreibung          | 0                          | 36                              | 135                                                                | 121                                                      | 292           |
| Wertminderung                          | 0                          | 0                               | 0                                                                  | 0                                                        | 0             |
| Abgänge                                | 0                          | -9                              | -6                                                                 | -4                                                       | -19           |
| <b>31. Dezember 2009</b>               | <b>94</b>                  | <b>219</b>                      | <b>376</b>                                                         | <b>266</b>                                               | <b>955</b>    |
| Währungsdifferenzen                    | 2                          | 4                               | 7                                                                  | 5                                                        | 18            |
| Zugänge laufende Abschreibung          | 0                          | 36                              | 143                                                                | 142                                                      | 321           |
| Wertminderung                          | 0                          | 0                               | 0                                                                  | 0                                                        | 0             |
| Abgänge                                | 0                          | -10                             | 1                                                                  | -5                                                       | -14           |
| <b>31. Dezember 2010</b>               | <b>96</b>                  | <b>249</b>                      | <b>527</b>                                                         | <b>408</b>                                               | <b>1.280</b>  |
| <b>Nettobuchwert 31. Dezember 2009</b> | <b>4.994</b>               | <b>115</b>                      | <b>287</b>                                                         | <b>492</b>                                               | <b>5.888</b>  |
| <b>Nettobuchwert 31. Dezember 2010</b> | <b>8.431</b>               | <b>168</b>                      | <b>713</b>                                                         | <b>1.495</b>                                             | <b>10.807</b> |

Die Zugänge zum Geschäfts- oder Firmenwert resultieren aus unseren Unternehmenszusammenschlüssen (3.405 Mio. €) und aus Anpassungen des Geschäfts- oder Firmenwertes früherer Unternehmenszusammenschlüsse (4 Mio. €) infolge einer Anpassung der erwarteten bedingten Kaufpreiszahlung, die wir zuvor gemäß IFRS 3 (2004) bilanziert hatten. Weitere Erläuterungen zu den Unternehmenszusammenschlüssen ergeben sich aus Textziffer (4).

Software- und Datenbanklizenzen dienen überwiegend dem internen Gebrauch; erworbene Technologie besteht neben gekaufter Software, die in unsere Projekte einfließt, aus erworbenen, aber noch nicht abgeschlossenen Forschungs- und Entwicklungsprojekten. Zugänge zu den Software- und Datenbanklizenzen in den Jahren 2010 und 2009 resultieren aus einzelnen Käufen von Dritten und beinhalten auch gegenseitige Lizenzvereinbarungen mit anderen Unternehmen sowie erworbene Patente, wohingegen sich die Zugänge in den Positionen erworbene Technologie und übrige immaterielle Vermögenswerte in erster Linie aus unseren Unternehmenszusammenschlüssen ergeben (siehe Textziffer (4)).

Bei den übrigen immateriellen Vermögenswerten handelt es sich vor allem um erworbene Markenrechte und Kundenbeziehungen.

Der Posten immaterielle Vermögenswerte enthält folgende wesentliche immaterielle Vermögenswerte:

#### Wesentliche immaterielle Vermögenswerte

| Beschreibung                                                    | Buchwert in Mio. € |            | Restnut-<br>zungsdauer<br>in Jahren |
|-----------------------------------------------------------------|--------------------|------------|-------------------------------------|
|                                                                 | 2010               | 2009       |                                     |
| Sybase – erworbene Technologie                                  | 518                | 0          | 4–6                                 |
| Business Objects –<br>erworbene Technologie                     | 86                 | 139        | 1–5                                 |
| Sybase –<br>Kundenbeziehungen Wartung                           | 846                | 0          | 12                                  |
| Sybase – Sonstige Kundenbezie-<br>hungen (Lizenz und Messaging) | 189                | 0          | 2–10                                |
| Business Objects –<br>Kundenbeziehungen Wartung                 | 250                | 270        | 11–14                               |
| Business-Objects –<br>Sonstige Kundenbeziehungen                | 67                 | 95         | 6–9                                 |
| <b>Summe wesentliche immaterielle<br/>Vermögenswerte</b>        | <b>1.956</b>       | <b>504</b> |                                     |

Abschreibungen auf immaterielle Vermögenswerte werden der Nutzung entsprechend in den Funktionsbereichen Software- und softwarebezogene Servicekosten, Beratungs- und sonstige Servicekosten, Forschungs- und Entwicklungskosten, Vertriebs- und Marketingkosten sowie allgemeine Verwaltungskosten erfasst.

Der Geschäfts- oder Firmenwert wurde unseren zahlungsmittelgenerierenden Einheiten zugeordnet. Diese entsprechen unseren Geschäftssegmenten. Der Buchwert des Geschäfts- oder Firmenwertes ist den Segmenten zum 31. Dezember 2010 und 2009 wie folgt zugeordnet:

## Geschäfts- oder Firmenwert nach Segmenten

| Mio. €       | 31.12.2010   | davon<br>Veränderungen<br>2010 | 31.12.2009   | davon<br>Veränderungen<br>2009 |
|--------------|--------------|--------------------------------|--------------|--------------------------------|
| Segment      |              |                                |              |                                |
| Produkt      | 5.002        | 777                            | 4.160        | 38                             |
| Beratung     | 764          | 67                             | 687          | 2                              |
| Schulung     | 171          | 22                             | 147          | 1                              |
| Sybase       | 2.494        | 2.535                          | 0            | 0                              |
| <b>Summe</b> | <b>8.431</b> | <b>3.401</b>                   | <b>4.994</b> | <b>41</b>                      |

Erläuterungen zur Abgrenzung der Segmente finden sich in Textziffer (29).

Den erzielbaren Betrag unserer zahlungsmittelgenerierenden Einheiten haben wir anhand des Nutzungswertes ermittelt. Da die Segmente sich in komplementären Geschäftsbereichen befinden, basieren die erzielbaren Beträge zu einem gewissen Grad auf denselben wesentlichen Annahmen.

Die wesentlichen Annahmen, die wir für die Zwecke des Werthaltigkeitstests im Jahr 2010 angewendet haben, sind wie folgt:

|                                                          | Produkt | Beratung | Schulung | Sybase |
|----------------------------------------------------------|---------|----------|----------|--------|
| Diskontierungsfaktor (vor Steuern)                       | 8,56 %  | 8,61 %   | 8,58 %   | 9,56 % |
| Annahmen für Wachstumsraten im Rahmen des Geschäftsplans | 12–14 % | 6–12 %   | 5 %      | 4–6 %  |
| Endwachstumsrate                                         | 4 %     | 4 %      | 4 %      | 4 %    |

Im Jahr 2009 wurden die folgenden Annahmen verwendet:

|                                                          | Produkt | Beratung | Schulung | Sybase |
|----------------------------------------------------------|---------|----------|----------|--------|
| Diskontierungsfaktor (vor Steuern)                       | 9,61 %  | 9,67 %   | 9,53 %   | N/A    |
| Annahmen für Wachstumsraten im Rahmen des Geschäftsplans | 10–15 % | 8–9 %    | 8–9 %    | N/A    |
| Endwachstumsrate                                         | 4 %     | 4 %      | 4 %      | 4 %    |

Das Sybase-Segment ist nicht identisch mit dem Unternehmen Sybase, das wir im Juli 2010 erwarben. Einzelheiten hierzu sind in Textziffer (29) dargestellt. Insofern sind die dargestellten Wachstumsraten für das Sybase-Segment auch nicht identisch mit unserer Erwartung bezüglich der Umsätze aus dieser Akquisition insgesamt.

Für die Berechnung der erwarteten künftigen Cashflows werden tatsächliche operative Ergebnisse und unser vom Management genehmigter 5-Jahres-Geschäftsplan herangezogen. Die Wachstumsrate der Cashflows der Perioden, die über diesen 5-Jahres-Geschäftsplan hinausgehen, liegt nicht über der langfristigen durchschnittlichen Wachstumsrate für den Markt, in dem unsere zahlungsmittelgenerierenden Einheiten tätig sind. Unsere Cashflow-Prognosen werden mittels der gewichteten durchschnittlichen Kapitalkosten (Weighted Average Cost of Capital, WACC) vor Steuern auf den Barwert abgezinst.

Wir sind der Ansicht, dass keine realistische Änderung einer der oben genannten wesentlichen Annahmen dazu führen würde, dass der Buchwert einer zahlungsmittelgenerierenden Einheit ihren erzielbaren Betrag übersteigt. Denn selbst bei der Verwendung einer Wachstumsrate von 0 % für die Fortschreibung unserer zukünftigen erwarteten Cashflows im Anschluss an die Planungsperiode 2010 bzw. 2009 übersteigen die errechneten Nutzungswerte die Buchwerte der zahlungsmittelgenerierenden Einheiten.

## (17) Sachanlagen

### Sachanlagen

| Mio. €                                    | Grundstücke und Bauten | Andere Anlagen, Betriebs- und Geschäftsausstattung | Geleistete Anzahlungen und Anlagen im Bau | Gesamt       |
|-------------------------------------------|------------------------|----------------------------------------------------|-------------------------------------------|--------------|
| <b>Historische Anschaffungskosten</b>     |                        |                                                    |                                           |              |
| 1. Januar 2009                            | 1.165                  | 1.260                                              | 76                                        | 2.501        |
| Währungsdifferenzen                       | -2                     | 2                                                  | 0                                         | 0            |
| Zugänge aus Unternehmenszusammenschlüssen | 0                      | 1                                                  | 0                                         | 1            |
| Sonstige Zugänge                          | 91                     | 150                                                | -35                                       | 206          |
| Abgänge                                   | -10                    | -136                                               | 0                                         | -146         |
| Umbuchungen                               | 8                      | 0                                                  | -8                                        | 0            |
| <b>31. Dezember 2009</b>                  | <b>1.252</b>           | <b>1.277</b>                                       | <b>33</b>                                 | <b>2.562</b> |
| Währungsdifferenzen                       | 50                     | 38                                                 | 1                                         | 89           |
| Zugänge aus Unternehmenszusammenschlüssen | 10                     | 14                                                 | 0                                         | 24           |
| Sonstige Zugänge                          | 30                     | 226                                                | 7                                         | 263          |
| Abgänge                                   | -34                    | -165                                               | 0                                         | -199         |
| Umbuchungen                               | 28                     | 3                                                  | -31                                       | 0            |
| <b>31. Dezember 2010</b>                  | <b>1.336</b>           | <b>1.393</b>                                       | <b>10</b>                                 | <b>2.739</b> |
| <b>Kumulierte Abschreibungen</b>          |                        |                                                    |                                           |              |
| 1. Januar 2009                            | 348                    | 748                                                | 0                                         | 1.096        |
| Währungsdifferenzen                       | 0                      | 1                                                  | 0                                         | 1            |
| Zugänge laufende Abschreibung             | 41                     | 162                                                | 0                                         | 203          |
| Wertminderungen                           | 1                      | 2                                                  | 0                                         | 3            |
| Abgänge                                   | -8                     | -104                                               | 0                                         | -112         |
| Umbuchungen                               | 0                      | 0                                                  | 0                                         | 0            |
| <b>31. Dezember 2009</b>                  | <b>382</b>             | <b>809</b>                                         | <b>0</b>                                  | <b>1.191</b> |
| Währungsdifferenzen                       | 19                     | 26                                                 | 0                                         | 45           |
| Zugänge laufende Abschreibung             | 45                     | 166                                                | 0                                         | 211          |
| Wertminderungen                           | 2                      | 0                                                  | 0                                         | 2            |
| Abgänge                                   | -23                    | -136                                               | 0                                         | -159         |
| Umbuchungen                               | 0                      | 0                                                  | 0                                         | 0            |
| <b>31. Dezember 2010</b>                  | <b>425</b>             | <b>865</b>                                         | <b>0</b>                                  | <b>1.290</b> |
| <b>Nettobuchwert</b>                      |                        |                                                    |                                           |              |
| <b>31. Dezember 2009</b>                  | <b>870</b>             | <b>468</b>                                         | <b>33</b>                                 | <b>1.371</b> |
| <b>31. Dezember 2010</b>                  | <b>911</b>             | <b>528</b>                                         | <b>10</b>                                 | <b>1.449</b> |



Die Zu- und Abgänge unter anderen Anlagen resultieren im Wesentlichen aus der Erneuerung und Erweiterung der IT-Infrastruktur und des Fahrzeugbestands im Rahmen der gewöhnlichen Geschäftstätigkeit.

### **(18) Verbindlichkeiten aus Lieferungen und Leistungen und sonstige Verbindlichkeiten, finanzielle Verbindlichkeiten und sonstige nicht finanzielle Verbindlichkeiten**

#### **(18a) Verbindlichkeiten aus Lieferungen und Leistungen und sonstige Verbindlichkeiten**

Nach ihrer Restlaufzeit gliedern sich die Verbindlichkeiten aus Lieferungen und Leistungen und sonstigen Verbindlichkeiten zum 31. Dezember wie folgt:

| Mio. €                                                                                 | 2010<br>Restlaufzeit |             |                       | 2009<br>Restlaufzeit |             |                       |
|----------------------------------------------------------------------------------------|----------------------|-------------|-----------------------|----------------------|-------------|-----------------------|
|                                                                                        | Kurzfristig          | Langfristig | Wert am<br>31.12.2010 | Kurzfristig          | Langfristig | Wert am<br>31.12.2009 |
| Verbindlichkeiten aus Lieferungen und Leistungen                                       | 699                  | 0           | 699                   | 479                  | 0           | 479                   |
| Erhaltene Anzahlungen auf Bestellungen                                                 | 97                   | 0           | 97                    | 88                   | 0           | 88                    |
| Übrige Verbindlichkeiten                                                               | 126                  | 30          | 156                   | 71                   | 35          | 106                   |
| <b>Verbindlichkeiten aus Lieferungen und Leistungen und sonstige Verbindlichkeiten</b> | <b>922</b>           | <b>30</b>   | <b>952</b>            | <b>638</b>           | <b>35</b>   | <b>673</b>            |

Die übrigen Verbindlichkeiten umfassen vorwiegend Abgrenzungsposten für mietfreie Zeiten und Verbindlichkeiten aus Zuwendungen der öffentlichen Hand.

#### **(18b) Finanzielle Verbindlichkeiten**

Die finanziellen Verbindlichkeiten stellen sich zum 31. Dezember wie folgt dar:

### **Finanzielle Verbindlichkeiten**

| Mio. €                                       | 2010<br>Restlaufzeit |              |                       | 2009<br>Restlaufzeit |             |                       |
|----------------------------------------------|----------------------|--------------|-----------------------|----------------------|-------------|-----------------------|
|                                              | Kurzfristig          | Langfristig  | Wert am<br>31.12.2010 | Kurzfristig          | Langfristig | Wert am<br>31.12.2009 |
| Anleihen                                     | 0                    | 2.191        | 2.191                 | 0                    | 0           | 0                     |
| Privatplatzierungen                          | 0                    | 1.069        | 1.069                 | 0                    | 697         | 697                   |
| Verbindlichkeiten gegenüber Kreditinstituten | 1                    | 1.098        | 1.099                 | 4                    | 2           | 6                     |
| Sonstige finanzielle Verbindlichkeiten       | 141                  | 91           | 232                   | 142                  | 30          | 172                   |
| <b>Finanzielle Verbindlichkeiten</b>         | <b>142</b>           | <b>4.449</b> | <b>4.591</b>          | <b>146</b>           | <b>729</b>  | <b>875</b>            |

Sicherheiten für finanzielle Verbindlichkeiten werden mit Ausnahme branchenüblicher Eigentumsvorbehalte und vergleichbarer Rechte nicht gestellt. Der effektive Zinssatz für unsere finanziellen Verbindlichkeiten betrug im Jahr 2010 2,76 % (2009: 4,32 %; 2008: 4,30 %).

Eine Aufgliederung der vertraglichen Zahlungsströme unserer Finanzschulden nach Fälligkeit ist in Textziffer (25) enthalten. Informationen zu den Risiken, die mit unseren finanziellen Verbindlichkeiten verbunden sind, sind Textziffer (26) zu entnehmen. Angaben zu den beizulegenden Zeitwerten enthält Textziffer (27).

### **Anleihen**

Im Geschäftsjahr 2010 haben wir Anleihen mit den folgenden Konditionen ausgegeben:

### **Anleihen**

|                   | Laufzeit | Ausgabekurs | Nominalzins  | Effektivzins | Nominalvolumen<br>am 31.12.2010<br>in jeweiliger<br>Währung | <b>Wert am<br/>31.12.2010<br/>in Mio. €</b> |
|-------------------|----------|-------------|--------------|--------------|-------------------------------------------------------------|---------------------------------------------|
| Eurobond 1 – 2010 | 2014     | 99,755 %    | 2,50 % (fix) | 2,65 %       | 500 Mio. €                                                  | 498                                         |
| Eurobond 2 – 2010 | 2017     | 99,780 %    | 3,50 % (fix) | 3,59 %       | 500 Mio. €                                                  | 497                                         |
| Eurobond 3 – 2010 | 2012     | 99,863 %    | 1,75 % (fix) | 2,01 %       | 600 Mio. €                                                  | 598                                         |
| Eurobond 4 – 2010 | 2013     | 99,857 %    | 2,25 % (fix) | 2,39 %       | 600 Mio. €                                                  | 598                                         |
| <b>Anleihen</b>   |          |             |              |              |                                                             | <b>2.191</b>                                |

Die Eurobonds wurden an der Luxemburger Wertpapierbörse im regulierten Markt zugelassen.

## Privatplatzierungen

Unsere Privatplatzierungen haben die folgenden Konditionen:

### Privatplatzierungen

|                                | Laufzeit | Nominalzins       | Effektivzins | Nominalvolumen<br>in jeweiliger<br>Währung am<br>31.12.2010 | Wert am<br>31.12.2010<br>in Mio. € | Wert am<br>31.12.2009<br>in Mio. € |
|--------------------------------|----------|-------------------|--------------|-------------------------------------------------------------|------------------------------------|------------------------------------|
| Deutsches Schuldscheindarlehen |          |                   |              | 697 Mio. €                                                  | 696                                | 697                                |
| Tranche 1 – 2009               | 2012     | 4,04 % (fix)      | 4,08 %       | 63,5 Mio. €                                                 |                                    |                                    |
| Tranche 2 – 2009               | 2012     | 2,87 % (variabel) | 2,92 %       | 359,5 Mio. €                                                |                                    |                                    |
| Tranche 3 – 2009               | 2014     | 4,92 % (fix)      | 4,98 %       | 86 Mio. €                                                   |                                    |                                    |
| Tranche 4 – 2009               | 2014     | 3,22 % (variabel) | 3,27 %       | 158 Mio. €                                                  |                                    |                                    |
| Tranche 5 – 2009               | 2014     | 3,28 % (variabel) | 3,32 %       | 30 Mio. €                                                   |                                    |                                    |
| US-Privatplatzierung           |          |                   |              | 500 Mio. US\$                                               | 373                                | 0                                  |
| Tranche 1 – 2010               | 2015     | 2,34 % (fix)      | 2,40 %       | 300 Mio. US\$                                               |                                    |                                    |
| Tranche 2 – 2010               | 2017     | 2,95 % (fix)      | 3,03 %       | 200 Mio. US\$                                               |                                    |                                    |
| <b>Privatplatzierungen</b>     |          |                   |              |                                                             | <b>1.069</b>                       | <b>697</b>                         |

Die Angabe von Kupon und effektivem Zinssatz für die variabel verzinslichen Tranchen 2, 4 und 5 des deutschen Schuldscheindarlehens (SSD) wurde auf der Grundlage des letzten 3-Monats-EURIBOR-Fixings für diese Tranchen im Jahr 2010 ermittelt.

Die US-Privatplatzierung wurde über eine unserer Konzerngesellschaften begeben, deren funktionale Währung der US-Dollar ist.

### Verbindlichkeiten gegenüber Kreditinstituten

Unsere Verbindlichkeiten gegenüber Kreditinstituten haben die folgenden Konditionen:

### Verbindlichkeiten gegenüber Kreditinstituten

|                                                     | Laufzeit | Nominalzins       | Effektivzins | Nominalvolumen<br>am 31.12.2010<br>in jeweiliger<br>Währung | Wert am<br>31.12.2010<br>in Mio. € | Wert am<br>31.12.2009<br>in Mio. € |
|-----------------------------------------------------|----------|-------------------|--------------|-------------------------------------------------------------|------------------------------------|------------------------------------|
| Akquisitionsdarlehen                                | 2012     | 1,45 % (variabel) | 2,02 %       | 1.000 Mio. €                                                | 992                                | 0                                  |
| Zusätzliches Darlehen                               | 2012     | 1,89 % (variabel) | 1,89 %       | 100 Mio. €                                                  | 100                                | 0                                  |
| Sonstige Darlehen                                   | –        | variabel          | variabel     | 7 Mio. €                                                    | 7                                  | 6                                  |
| <b>Verbindlichkeiten gegenüber Kreditinstituten</b> |          |                   |              | <b>1.107 Mio. €</b>                                         | <b>1.099</b>                       | <b>6</b>                           |

Zunächst wurde ein Betrag von rund 2,64 Mrd. € (bestehend aus Tranchen von 2,25 Mrd. € und 500 Mio. US\$) aus dem Akquisitionsdarlehen zur Finanzierung des Erwerbs von Sybase im Juli 2010 in Anspruch genommen. Seit der ersten Inanspruchnahme wurde ein Betrag von rund 1,64 Mrd. € refinanziert, hauptsächlich über die oben beschriebenen begebenen Anleihen (1,2 Mrd. €) und Privatplatzierungen (500 Mio. US\$). Der ausstehende Betrag von 1,0 Mrd. € des Akquisitionsdarlehens wurde im Oktober 2010 von einem Bankenkonsortium übernommen und hat eine Restlaufzeit von 17 Monaten. Darüber hinaus haben wir im Rahmen der Sybase-Akquisition übernommene Wandelschuldverschreibungen im Betrag von 469 Mio. € abgelöst.

Die Angabe von Kupon und effektivem Zinssatz für das variabel verzinsliche Akquisitionsdarlehen wurde auf der Grundlage des letzten 1-Monats-EURIBOR-Fixings im Jahr 2010 ermittelt, wohingegen für das zusätzliche Darlehen das letzte 12-Monats-EURIBOR-Fixing im Jahr 2010 zugrunde liegt.

#### **Sonstige finanzielle Verbindlichkeiten**

Unsere sonstigen finanziellen Verbindlichkeiten bestehen hauptsächlich aus Derivaten und Zinsabgrenzungen.

#### **(18c) Sonstige nicht finanzielle Verbindlichkeiten**

Die sonstigen nicht finanziellen Verbindlichkeiten stellen sich zum 31. Dezember wie folgt dar:

#### **Sonstige nicht finanzielle Verbindlichkeiten**

| Mio. €                                              | 2010<br>Restlaufzeit |             |                       | 2009<br>Restlaufzeit |             |                       |
|-----------------------------------------------------|----------------------|-------------|-----------------------|----------------------|-------------|-----------------------|
|                                                     | Kurzfristig          | Langfristig | Wert am<br>31.12.2010 | Kurzfristig          | Langfristig | Wert am<br>31.12.2009 |
| Mitarbeiterbezogene Verbindlichkeiten               | 1.362                | 85          | 1.447                 | 1.343                | 12          | 1.355                 |
| Verbindlichkeiten aus Steuern                       | 364                  | 0           | 364                   | 234                  | 0           | 234                   |
| <b>Sonstige nicht finanzielle Verbindlichkeiten</b> | <b>1.726</b>         | <b>85</b>   | <b>1.811</b>          | <b>1.577</b>         | <b>12</b>   | <b>1.589</b>          |

Die mitarbeiterbezogenen Verbindlichkeiten betreffen überwiegend Urlaubsrückstellungen, Bonus-Rückstellungen, Rückstellungen für Verkaufsprovisionen sowie Verpflichtungen für mitarbeiterbezogene soziale Abgaben.

Die Verbindlichkeiten aus Steuern betreffen in erster Linie Steuerschulden aus Löhnen und Gehältern sowie Verbindlichkeiten aus Mehrwertsteuern.

#### **(19) Rückstellungen**

Nach ihrer Restlaufzeit gliedern sich die Rückstellungen zum 31. Dezember wie folgt:

## Rückstellungen

| Mio. €                                                                       | 2010         |             |              | 2009        |             |            |
|------------------------------------------------------------------------------|--------------|-------------|--------------|-------------|-------------|------------|
|                                                                              | Kurzfristig  | Langfristig | Gesamt       | Kurzfristig | Langfristig | Gesamt     |
| Rückstellungen für Pensionen und ähnliche Verpflichtungen (Textziffer (19a)) | 2            | 76          | 78           | 2           | 49          | 51         |
| Sonstige Rückstellungen (Textziffer (19b))                                   | 1.282        | 216         | 1.498        | 330         | 149         | 479        |
|                                                                              | <b>1.284</b> | <b>292</b>  | <b>1.576</b> | <b>332</b>  | <b>198</b>  | <b>530</b> |

### **(19a) Rückstellungen für Pensionen und ähnliche Verpflichtungen**

Für die betriebliche Altersversorgung von Mitarbeitern bestehen bei uns im In- und Ausland sowohl leistungs- als auch beitragsorientierte Zusagen auf Alters-, Invaliden- und Hinterbliebenenleistungen. Der Bewertungsstichtag der deutschen und ausländischen Pensionspläne ist der 31. Dezember. Für unsere Vorstandsmitglieder existieren individuelle Zusagen. Des Weiteren bieten wir Mitarbeitern in bestimmten Ländern Abfindungszahlungen unabhängig vom Grund der Beendigung des Arbeitsverhältnisses. Diese Leistungen sind üblicherweise durch Gesetze in diesen Ländern festgelegt.

Die Höhe der Versorgungszusagen für unsere inländischen Pensionspläne bemisst sich im Wesentlichen nach der Beschäftigungsdauer und der Vergütung der einzelnen Mitarbeiter.

Zusätzlich existiert ein inländischer, mitarbeiterfinanzierter Pensionsplan, für den SAP eine Mindestkapitalrendite garantiert, die der entsprechenden Zusage der Versicherungsgesellschaft entspricht. Obwohl das Risiko, dass SAP für eine Rendite eintreten muss, weil die Versicherungsgesellschaft sie nicht gewähren kann, als sehr gering einzustufen ist, sind diese mitarbeiterfinanzierten Pensionspläne nach IFRS nicht als beitragsorientierte Pläne zu klassifizieren. Stattdessen erfolgt eine Berücksichtigung im inländischen Planvermögen und in den inländischen Pensionsrückstellungen.

Die Höhe der Versorgungszusagen aus den Pensionsplänen im Ausland bemisst sich hauptsächlich nach dem Gehalt, dem Alter und der Beschäftigungsdauer der einzelnen Mitarbeiter.

Einige unserer ausländischen Tochterunternehmen sind verpflichtet, ihren Mitarbeitern Abfindungen unabhängig vom Grund der Beendigung des Arbeitsverhältnisses (Pensionierung, freiwilliges oder erzwungenes Ausscheiden) zu zahlen. Wir stufen diese Verpflichtungen als leistungsorientierte Pläne ein, sofern die gewährten Leistungen nach Beendigung des Arbeitsverhältnisses ihrem Wesen nach pensionsähnlichen Vereinbarungen entsprechen. Die meisten dieser Verträge enthalten für die Mitarbeiter eine einmalige Abfindungszahlung, die auf Gehalt, Alter und Beschäftigungsdauer zum Zeitpunkt der Beendigung des Arbeitsverhältnisses basiert, wobei der Kündigungsgrund (Pensionierung, freiwilliges oder erzwungenes Ausscheiden) keine Rolle spielt.

Unsere Tochterunternehmen in den USA haben im Jahr 2008 entschieden, ihren leistungsorientierten Pensionsplan mit Wirkung zum 31. Dezember 2008 „einzufrieren“, und haben stattdessen zusätzliche und verbesserte Leistungen im Rahmen eines beitragsorientierten 401k-Plans angeboten. Demzufolge erfassten wir im Zusammenhang mit dem Rückgang der leistungsorientierten Verpflichtungen einen Gewinn aus der Plankürzung in Höhe von 9 Mio. € im Jahr 2008.

In der nachfolgenden Tabelle sind die Änderungen der Barwerte der leistungsorientierten Pensionsverpflichtungen und des beizulegenden Zeitwertes des Planvermögens aufgeführt. Der Finanzierungsstatus wurde auf die ausgewiesenen Nettobeträge übergeleitet:

## Veränderung der Barwerte der leistungsorientierten Pensionsverpflichtungen und des beizulegenden Zeitwertes des Planvermögens

| Mio. €                                                                                | Inländische Pensionspläne |            | Ausländische Pensionspläne |            | Sonstige leistungsorientierte Pläne |            | Gesamt     |            |
|---------------------------------------------------------------------------------------|---------------------------|------------|----------------------------|------------|-------------------------------------|------------|------------|------------|
|                                                                                       | 2010                      | 2009       | 2010                       | 2009       | 2010                                | 2009       | 2010       | 2009       |
| <b>Veränderung der Pensionsverpflichtungen</b>                                        |                           |            |                            |            |                                     |            |            |            |
| Dynamische Pensionsverpflichtungen (DBO) per 1.1.                                     | 346                       | 314        | 343                        | 306        | 20                                  | 18         | 709        | 638        |
| Dienstzeitaufwand: Barwert der im Jahr erdienten Ansprüche                            | -4                        | -6         | 17                         | 15         | 3                                   | 2          | 16         | 11         |
| Zinsaufwand                                                                           | 18                        | 18         | 17                         | 15         | 1                                   | 1          | 36         | 34         |
| Arbeitnehmerbeiträge                                                                  | 46                        | 35         | 4                          | 4          | 0                                   | 0          | 50         | 39         |
| Versicherungstechnische Verluste (+)/Gewinne (-)                                      | 13                        | -13        | 29                         | 31         | 2                                   | 0          | 44         | 18         |
| Rentenzahlungen                                                                       | -4                        | -2         | -17                        | -21        | -1                                  | -1         | -22        | -24        |
| Unternehmenserwerbe                                                                   | 1                         | 0          | 4                          | 2          | 4                                   | 0          | 9          | 2          |
| Plankürzung/Abgeltung                                                                 | 0                         | 0          | 0                          | -1         | -4                                  | 0          | -4         | -1         |
| Nachzuverrechnender Dienstzeitaufwand                                                 | 0                         | 0          | -3                         | 0          | 0                                   | 0          | -3         | 0          |
| Kursdifferenzen                                                                       | 0                         | 0          | 45                         | -8         | 0                                   | 0          | 45         | -8         |
| <b>Dynamische Pensionsverpflichtungen (DBO) per 31.12.</b>                            | <b>416</b>                | <b>346</b> | <b>439</b>                 | <b>343</b> | <b>25</b>                           | <b>20</b>  | <b>880</b> | <b>709</b> |
| davon voll/teilweise finanzierte Pensionspläne                                        | 416                       | 346        | 404                        | 317        | 12                                  | 8          | 832        | 671        |
| davon nicht finanzierte Pensionspläne                                                 | 0                         | 0          | 35                         | 26         | 13                                  | 12         | 48         | 38         |
| <b>Veränderung des Planvermögens</b>                                                  |                           |            |                            |            |                                     |            |            |            |
| Verkehrswert des Planvermögens per 1.1.                                               | 345                       | 314        | 311                        | 261        | 4                                   | 3          | 660        | 578        |
| Erwartete Erträge auf das Planvermögen                                                | 17                        | 15         | 19                         | 14         | 0                                   | 0          | 36         | 29         |
| Arbeitgeberbeiträge                                                                   | 1                         | 1          | 31                         | 29         | 5                                   | 2          | 37         | 32         |
| Arbeitnehmerbeiträge                                                                  | 46                        | 35         | 4                          | 4          | 0                                   | 0          | 50         | 39         |
| Rentenzahlungen                                                                       | -4                        | -2         | -17                        | -21        | -1                                  | -1         | -22        | -24        |
| Unternehmenserwerbe                                                                   | 0                         | 0          | 2                          | 2          | 0                                   | 0          | 2          | 2          |
| Planabgeltung                                                                         | 0                         | 0          | 0                          | 0          | -4                                  | 0          | -4         | 0          |
| Andere Änderungen                                                                     | 0                         | 0          | 0                          | 0          | 0                                   | 0          | 0          | 0          |
| Versicherungstechnische Verluste (+)/Gewinne (-)                                      | 9                         | -18        | -1                         | 28         | 0                                   | 0          | 8          | 10         |
| Kursdifferenzen                                                                       | 0                         | 0          | 37                         | -6         | 0                                   | 0          | 37         | -6         |
| <b>Verkehrswert des Planvermögens per 31.12.</b>                                      | <b>414</b>                | <b>345</b> | <b>386</b>                 | <b>311</b> | <b>4</b>                            | <b>4</b>   | <b>804</b> | <b>660</b> |
| <b>Über-/Unterdeckung des Fonds</b>                                                   | <b>-2</b>                 | <b>-1</b>  | <b>-53</b>                 | <b>-32</b> | <b>-21</b>                          | <b>-16</b> | <b>-76</b> | <b>-49</b> |
| <b>Der bilanziell erfasste Betrag gliedert sich in folgende Bilanzpositionen auf:</b> |                           |            |                            |            |                                     |            |            |            |
| Sonstige Forderungen                                                                  | 0                         | 0          | 2                          | 2          | 0                                   | 0          | 2          | 2          |
| Rückstellungen für Pensionen (kurzfristig)                                            | 0                         | 0          | -2                         | -2         | 0                                   | 0          | -2         | -2         |
| Rückstellungen für Pensionen (langfristig)                                            | -2                        | -1         | -53                        | -32        | -21                                 | -16        | -76        | -49        |
|                                                                                       | <b>-2</b>                 | <b>-1</b>  | <b>-53</b>                 | <b>-32</b> | <b>-21</b>                          | <b>-16</b> | <b>-76</b> | <b>-49</b> |

Bei der versicherungsmathematischen Ermittlung unserer Verpflichtungen für die leistungsorientierten Pensionspläne im In- und Ausland sowie bei übrigen nach Beendigung des

Arbeitsverhältnisses bestehenden Verpflichtungen haben wir an den jeweiligen Bewertungsstichtagen folgende Annahmen (gewichteter Durchschnitt) zugrunde gelegt:

### Versicherungsmathematische Annahmen für leistungsorientierte Pensionsverpflichtungen

| Prozent          | Inländische Pensionspläne |      |      | Ausländische Pensionspläne |      |      | Sonstige leistungsorientierte Pläne |      |      |
|------------------|---------------------------|------|------|----------------------------|------|------|-------------------------------------|------|------|
|                  | 2010                      | 2009 | 2008 | 2010                       | 2009 | 2008 | 2010                                | 2009 | 2008 |
| Abzinsungsfaktor | 4,9                       | 5,1  | 5,8  | 3,3                        | 4,7  | 4,8  | 5,7                                 | 5,7  | 6,4  |
| Gehaltstrend     | 2,5                       | 2,5  | 2,1  | 1,8                        | 2,3  | 2,4  | 5,0                                 | 6,9  | 5,6  |

Die zur Diskontierung verwendeten Zinssätze leiten wir von Unternehmensanleihen mit sehr guter Bonität und Staatsanleihen ab, bei denen Laufzeit und Auszahlungen kongruent zu unseren Pensionsplänen sind.

Der Gesamtaufwand für unsere leistungsorientierten Pensionspläne wird als operativer Aufwand erfasst und setzte sich für die Geschäftsjahre 2010, 2009 und 2008 jeweils wie folgt zusammen:

### Gesamtaufwand für leistungsorientierte Pensionspläne

| Mio. €                                | Inländische Pensionspläne |           |          | Ausländische Pensionspläne |           |           | Sonstige leistungsorientierte Pläne |          |          | Gesamt    |           |           |
|---------------------------------------|---------------------------|-----------|----------|----------------------------|-----------|-----------|-------------------------------------|----------|----------|-----------|-----------|-----------|
|                                       | 2010                      | 2009      | 2008     | 2010                       | 2009      | 2008      | 2010                                | 2009     | 2008     | 2010      | 2009      | 2008      |
| Dienstzeitaufwand                     | -4                        | -6        | 1        | 17                         | 15        | 38        | 3                                   | 2        | 2        | 16        | 11        | 41        |
| Zinsaufwand                           | 18                        | 18        | 15       | 17                         | 15        | 14        | 1                                   | 1        | 1        | 36        | 34        | 30        |
| Erwarteter Ertrag aus Planvermögen    | -17                       | -15       | -14      | -19                        | -14       | -21       | 0                                   | 0        | 0        | -36       | -29       | -35       |
| Plankürzung                           | 0                         | 0         | 0        | 0                          | -1        | -9        | 0                                   | 0        | 0        | 0         | -1        | -9        |
| Nachzuverrechnender Dienstzeitaufwand | 0                         | 0         | 0        | -3                         | 0         | 0         | 0                                   | 0        | 0        | -3        | 0         | 0         |
| <b>Gesamtaufwand</b>                  | <b>-3</b>                 | <b>-3</b> | <b>2</b> | <b>12</b>                  | <b>15</b> | <b>22</b> | <b>4</b>                            | <b>3</b> | <b>3</b> | <b>13</b> | <b>15</b> | <b>27</b> |
| Tatsächlicher Vermögensertrag         | 26                        | -3        | 6        | 18                         | 42        | -78       | 0                                   | 0        | 0        | 44        | 39        | -72       |

Da unsere deutschen Pensionspläne größtenteils aus einem mitarbeiterfinanzierten Plan bestehen, der durch qualifizierte Versicherungsverträge finanziert ist, kann der Dienstzeitaufwand rechnerisch einen Ertrag ergeben, der aus der Anpassung des Buchwertes der leistungsorientierten Pensionsver-

pflichtung an den beizulegenden Zeitwert des Planvermögens der qualifizierten Versicherungsverträge resultiert. Diese Anpassung ist im Dienstzeitaufwand reflektiert.

Wir haben die folgenden versicherungsmathematischen Gewinne und Verluste für leistungsorientierte Pensionspläne erfasst:

#### Im Eigenkapital erfasste versicherungsmathematische Gewinne und Verluste

| Mio. €                                                                                                 | Inländische Pensionspläne |            |            | Ausländische Pensionspläne |           |           | Sonstige leistungsorientierte Pläne |           |           | Gesamt    |           |           |
|--------------------------------------------------------------------------------------------------------|---------------------------|------------|------------|----------------------------|-----------|-----------|-------------------------------------|-----------|-----------|-----------|-----------|-----------|
|                                                                                                        | 2010                      | 2009       | 2008       | 2010                       | 2009      | 2008      | 2010                                | 2009      | 2008      | 2010      | 2009      | 2008      |
| Im Eigenkapital erfasster Anfangs-saldo der versicherungsmathematischen Gewinne (-) und Verluste (+)   | -10                       | -18        | -16        | 53                         | 57        | 0         | -2                                  | -2        | -2        | 41        | 37        | -18       |
| In der Periode erfasste versicherungsmathematische Gewinne (-) und Verluste (+)                        | 4                         | 5          | -2         | 30                         | 3         | 54        | 2                                   | 0         | 0         | 36        | 8         | 52        |
| Sonstige Veränderungen                                                                                 | 0                         | 3          | 0          | 0                          | -5        | 0         | 0                                   | 0         | 0         | 0         | -2        | 0         |
| Kursdifferenzen                                                                                        | 0                         | 0          | 0          | 3                          | -2        | 3         | 0                                   | 0         | 0         | 3         | -2        | 3         |
| <b>Im Eigenkapital erfasster Endsaldo der versicherungsmathematischen Gewinne (-) und Verluste (+)</b> | <b>-6</b>                 | <b>-10</b> | <b>-18</b> | <b>86</b>                  | <b>53</b> | <b>57</b> | <b>0</b>                            | <b>-2</b> | <b>-2</b> | <b>80</b> | <b>41</b> | <b>37</b> |

Für die Berechnung des Gesamtaufwands für die Jahre 2010, 2009 und 2008 und die Schätzung des Barwertes der leistungsorientierten Pensionsverpflichtungen sowie des beizulegenden Zeitwertes des Planvermögens für den 31. Dezember 2010, 2009 und 2008 wurden folgende grundlegende versicherungsmathematische Annahmen getroffen (ausgedrückt als gewichtete Durchschnitte für unsere Pensionspläne im Ausland und unsere Pläne für Leistungen nach Beendigung des Arbeitsverhältnisses):



## Versicherungsmathematische Annahmen für den Gesamtaufwand

| Prozent                             | Inländische Pensionspläne |      |      | Ausländische Pensionspläne |      |      | Sonstige leistungsorientierte Pläne |      |      |
|-------------------------------------|---------------------------|------|------|----------------------------|------|------|-------------------------------------|------|------|
|                                     | 2010                      | 2009 | 2008 | 2010                       | 2009 | 2008 | 2010                                | 2009 | 2008 |
| Abzinsungsfaktor                    | 5,1                       | 5,8  | 5,5  | 4,4                        | 5,0  | 4,8  | 5,6                                 | 6,5  | 6,1  |
| Erwartete Rendite des Planvermögens | 4,5                       | 4,5  | 4,9  | 5,1                        | 5,3  | 6,5  | 7,6                                 | 6,5  | 6,2  |
| Gehaltstrend                        | 2,2                       | 2,1  | 2,1  | 1,8                        | 2,3  | 4,5  | 4,9                                 | 6,3  | 4,0  |

Im Rahmen unserer inländischen Pensionspläne verwenden wir die Beiträge ausschließlich zum Abschluss von Rückdeckungsversicherungen. Die erwartete Rendite des Planvermögens für unsere inländischen Pensionspläne spiegelt somit die erwartete Verzinsung dieser Versicherungen unter Berücksichtigung von deren Vermögensanlagen wider.

Die erwartete Rendite des ausländischen Planvermögens basiert auf dem gewichteten Durchschnitt der langfristigen Ertragserwartungen für jede einzelne Vermögenskategorie

des Gesamtportfolios. Zur Abschätzung der langfristigen Ertragserwartungen berücksichtigen wir verschiedene Faktoren wie beispielsweise die historischen Renditeentwicklungen und die erwartete Inflation. Die historischen Renditeentwicklungen und andere relevante finanzielle Faktoren werden auf Angemessenheit und Plausibilität untersucht und gegebenenfalls um Sondereffekte bereinigt. Die Portfoliostruktur des ausländischen Planvermögens am 31. Dezember 2010 sowie die Ziel-Portfoliostruktur für das Geschäftsjahr 2011 ergeben sich wie folgt:

## Portfoliostruktur des Planvermögens für ausländische Pensionspläne und sonstige leistungsorientierte Pläne

| Prozent                      | Ziel-Portfoliostruktur 2011 | Portfoliostruktur zum Bewertungsstichtag 2010 | Ziel-Portfoliostruktur 2010 | Portfoliostruktur zum Bewertungsstichtag 2009 |
|------------------------------|-----------------------------|-----------------------------------------------|-----------------------------|-----------------------------------------------|
| <b>Vermögenskategorie</b>    |                             |                                               |                             |                                               |
| Aktien                       | 12                          | 11                                            | 43                          | 44                                            |
| Festverzinsliche Wertpapiere | 81                          | 80                                            | 49                          | 45                                            |
| Immobilien                   | 3                           | 5                                             | 3                           | 4                                             |
| Andere                       | 4                           | 4                                             | 5                           | 7                                             |
| <b>Gesamt</b>                | <b>100</b>                  | <b>100</b>                                    | <b>100</b>                  | <b>100</b>                                    |

Die Anlagestrategien für unsere ausländischen Pensionspläne variieren in Abhängigkeit von den individuellen Rahmenbedingungen des Landes, in dem der Pensionsplan besteht. Grundsätzlich verfolgen alle großen ausländischen Pensionspläne

eine langfristige Anlagestrategie. Unsere Anlagegrundsätze sehen Investitionen in ein risikodiversifiziertes Portfolio aus verschiedenen Anlageformen innerhalb der oben genannten Ziel-Portfoliostruktur vor.

Die erwarteten Beitragszahlungen für 2011 betragen für die inländischen leistungsorientierten Pensionspläne 1 Mio. € und für die ausländischen leistungsorientierten Pensionspläne 31 Mio. €. Die Beiträge werden wir voraussichtlich durch Bar-mittel begleichen.

Die Beträge der Pensionsverpflichtungen, des Planvermögens, des Finanzierungsstatus und der erfahrungsbedingten Berichtigung für das aktuelle und die vier vorherigen Geschäftsjahre stellen sich wie folgt dar:

### Pensionsverpflichtungen, Planvermögen, Finanzierungsstatus und erfahrungsbedingte Berichtigung

| Mio. €                                             | Inländische Pensionspläne |           |          |           |           | Ausländische Pensionspläne |            |            |           |           | Sonstige leistungsorientierte Pläne |            |            |            |            | Gesamt     |            |            |          |           |
|----------------------------------------------------|---------------------------|-----------|----------|-----------|-----------|----------------------------|------------|------------|-----------|-----------|-------------------------------------|------------|------------|------------|------------|------------|------------|------------|----------|-----------|
|                                                    | 2010                      | 2009      | 2008     | 2007      | 2006      | 2010                       | 2009       | 2008       | 2007      | 2006      | 2010                                | 2009       | 2008       | 2007       | 2006       | 2010       | 2009       | 2008       | 2007     | 2006      |
| Leistungsorientierte Pensionsverpflichtung         | 416                       | 346       | 314      | 274       | 261       | 439                        | 343        | 306        | 287       | 275       | 25                                  | 20         | 18         | 13         | 16         | 880        | 709        | 638        | 574      | 552       |
| Erfahrungsbedingte Berichtigung der Verpflichtung  | 13                        | -13       | -10      | -37       | -17       | 29                         | 31         | -45        | 0         | -5        | 2                                   | 0          | 0          | -1         | 1          | 44         | 18         | -55        | -38      | -21       |
| Planvermögen                                       | 414                       | 345       | 314      | 272       | 255       | 386                        | 311        | 261        | 311       | 288       | 4                                   | 4          | 3          | 0          | 1          | 804        | 660        | 578        | 583      | 544       |
| Erfahrungsbedingte Berichtigung der Vermögenswerte | 9                         | -18       | -8       | -30       | -10       | -1                         | 28         | -99        | -10       | 10        | 0                                   | 0          | 0          | 0          | 0          | 8          | 10         | -107       | -40      | 0         |
| <b>Finanzierungsstatus</b>                         | <b>-2</b>                 | <b>-1</b> | <b>0</b> | <b>-2</b> | <b>-6</b> | <b>-53</b>                 | <b>-32</b> | <b>-45</b> | <b>24</b> | <b>13</b> | <b>-21</b>                          | <b>-16</b> | <b>-15</b> | <b>-13</b> | <b>-15</b> | <b>-76</b> | <b>-49</b> | <b>-60</b> | <b>9</b> | <b>-8</b> |

### Beitragsorientierte Pläne/Staatliche Pläne

Neben den leistungsorientierten Pensionsplänen bestehen sowohl im In- als auch im Ausland beitragsorientierte Pläne. Die Beiträge zu solchen Plänen bemessen wir nach einem bestimmten Prozentsatz der Vergütung der jeweiligen Mitarbeiter oder nach den von den Mitarbeitern selbst entrichteten Beiträgen. In Deutschland und einigen anderen Ländern leisten wir außerdem Beiträge an staatliche Rentensysteme, die vom Staat, von regionalen oder über-regionalen Einrichtungen des öffentlichen Rechts oder anderen Stellen betrieben werden. Der Gesamtaufwand für beitragsorientierte Pensionspläne und staatliche Pläne setzte sich für die Geschäftsjahre 2010, 2009 und 2008 jeweils wie folgt zusammen:

### Gesamtaufwand für beitragsorientierte Pensionspläne und staatliche Pläne

| Mio. €                            | 2010       | 2009       | 2008       |
|-----------------------------------|------------|------------|------------|
| Beitragsorientierte Pensionspläne | 136        | 132        | 100        |
| Staatliche Pläne                  | 215        | 183        | 177        |
| <b>Gesamtaufwand</b>              | <b>351</b> | <b>315</b> | <b>277</b> |

### (19b) Sonstige Rückstellungen

Die sonstigen Rückstellungen entwickelten sich wie folgt:

#### Sonstige Rückstellungen

| Mio. €                                                   | Anfangs-<br>bestand<br>1.1.2010 | Zuführung    | Auf-<br>zinsung | Erwerb    | Inanspruch-<br>nahme | Auflösung   | Währungs-<br>effekt | Endbestand<br>31.12.2010 |
|----------------------------------------------------------|---------------------------------|--------------|-----------------|-----------|----------------------|-------------|---------------------|--------------------------|
| <b>Personalbezogene Verpflichtungen</b>                  |                                 |              |                 |           |                      |             |                     |                          |
| Verpflichtungen aus aktienbasierten Vergütungsprogrammen | 114                             | 42           | 0               | 18        | -20                  | -11         | 4                   | 147                      |
| Sonstige personalbezogene Verpflichtungen                | 138                             | 118          | 0               | 2         | -71                  | -21         | 1                   | 167                      |
| <b>Kundenbezogene Verpflichtungen</b>                    | 35                              | 119          | 0               | 0         | -59                  | -47         | 2                   | 50                       |
| <b>Restrukturierungsverpflichtungen</b>                  |                                 |              |                 |           |                      |             |                     |                          |
| Abfindungen und ähnliche Verpflichtungen                 | 16                              | 1            | 0               | 0         | -14                  | 0           | 1                   | 4                        |
| Verpflichtungen aus der Aufgabe von Mietflächen          | 28                              | 6            | 1               | 0         | -17                  | -11         | 3                   | 10                       |
| <b>Verpflichtungen aus Rechtsstreitigkeiten</b>          |                                 |              |                 |           |                      |             |                     |                          |
| TomorrowNow-Rechtsstreit                                 | 93                              | 993          | 0               | 0         | -117                 | 0           | 28                  | 997                      |
| Sonstige Verpflichtungen aus Rechtsstreitigkeiten        | 30                              | 40           | 0               | 16        | -34                  | -16         | 4                   | 40                       |
| <b>Übrige Verpflichtungen</b>                            | 25                              | 15           | 1               | 52        | -8                   | -2          | 0                   | 83                       |
| <b>Summe</b>                                             | <b>479</b>                      | <b>1.334</b> | <b>2</b>        | <b>88</b> | <b>-340</b>          | <b>-108</b> | <b>43</b>           | <b>1.498</b>             |
| – davon kurzfristig                                      | 330                             |              |                 |           |                      |             |                     | 1.282                    |
| – davon langfristig                                      | 149                             |              |                 |           |                      |             |                     | 216                      |

Weitere Einzelheiten zu unseren anteilsbasierten Vergütungsprogrammen sind in Textziffer (28) aufgeführt.

Die sonstigen personalbezogenen Verpflichtungen resultieren vor allem aus Rückstellungen für Zeitguthaben, Rückstellungen für Abfindungszahlungen, Jubiläumsrückstellungen und Altersteilzeitrückstellungen. Die meisten dieser personalbezogenen Verpflichtungen könnten zwar innerhalb der nächsten zwölf Monate geltend gemacht werden, wir gehen jedoch nicht davon aus, dass die entsprechenden Cashflows innerhalb dieses Zeitraums anfallen werden.

Die kundenbezogenen Verpflichtungen betreffen Leistungsverpflichtungen sowie erwartete Auftragsverluste. Die damit verbundenen Mittelabflüsse sind vor allem kurzfristig.

Die Restrukturierungsverpflichtungen umfassen Aufwendungen für vorzeitige Vertragskündigungen, einschließlich der Aufwendungen, die im Zusammenhang mit der Beendigung von Mietverträgen stehen (Einzelheiten siehe Textziffer (6)). Die mitarbeiterbezogenen Restrukturierungsbeträge des Vorjahres haben typischerweise kurzfristigen Charakter, bis auf einen im Jahr 2009 eingerichteten Plan zum vorzeitigen Ruhestand. Die Inanspruchnahme der Rückstellungen für Aufwendungen für nicht genutzte Mietflächen ist von den Restlaufzeiten der zugrunde liegenden Mietverträge abhängig. Die Rückstellung hat eine langfristige Komponente von 3 Mio. €.

---

Die Verpflichtungen aus Rechtsstreitigkeiten beziehen sich in erster Linie auf die in Textziffer (24) beschriebenen Rechtsstreitigkeiten. Die Gesellschaft hat nach der Einholung rechtlicher Beratung Rückstellungen gebildet, die die Gegebenheiten jedes Einzelfalls berücksichtigen. Der Zeitpunkt der Mittelabflüsse im Zusammenhang mit Rechtsansprüchen kann nicht in allen Fällen auf angemessene Weise ermittelt werden. Die im Rahmen der Sybase-Akquisition im Jahr 2010 zugegangenen Rückstellungen für Rechtsstreitigkeiten sind vorläufige Schätzungen (siehe Textziffer (3c)). Wir gehen davon aus, dass ein Teil der in den Rückstellungen enthaltenen Prozesskosten durch Versicherungen abgedeckt wird. Bis zum 31. Dezember 2010 haben wir Versicherungsleistungen in Höhe von 15 Mio. € (31. Dezember 2009: 14 Mio. €) erhalten, die zu dem Zeitpunkt erfolgswirksam erfasst werden, zu dem es so gut wie sicher ist, dass diese Beträge nicht zurückgezahlt werden müssen. Weitere Informationen zu den Rückstellungen für Rechtsstreitigkeiten enthält Textziffer (24).

Die übrigen Verpflichtungen beziehen sich überwiegend auf Rückbauverpflichtungen von Veränderungen gemieteter Büroflächen, sonstige Drohverluste sowie Rückstellungen für Gewährleistungen. Für Rückbauverpflichtungen erfassen wir den Barwert in der Periode, in der die Verpflichtung entstanden ist. Grundsätzlich gehen wir davon aus, dass die entsprechenden Mittelabflüsse zum Zeitpunkt der Beendigung des jeweiligen Mietverhältnisses anfallen. Sie werden normalerweise als langfristig angesehen. Im Zusammenhang mit dem Erwerb von Sybase haben wir belastende Mietverträge in Höhe von

50 Mio. € übernommen. Die Inanspruchnahme dieser Rückstellung hängt von den Laufzeiten der zugrunde liegenden Mietverträge ab. Der entsprechende Mittelabfluss für die übrigen sonstigen Rückstellungen ist als kurzfristig einzustufen.

#### **(20) Passive Rechnungsabgrenzungsposten**

Die passiven Rechnungsabgrenzungsposten umfassen hauptsächlich Vorauszahlungen unserer Kunden für Supportleistungen sowie Beträge aus Beratungs-, Schulungs- und sonstigen Serviceleistungen. Ferner umfasst diese Position Beträge aus Mehrkomponentenverträgen, die den noch nicht erbrachten Leistungen zugeordnet werden. Des Weiteren enthält sie zum beizulegenden Zeitwert bewertete Beträge, die nach der Erwerbsmethode im Zusammenhang mit Akquisitionen für Leistungen erfasst wurden, die aufgrund von bestehenden Supportverträgen zu erbringen sind.

## (21) Eigenkapital

### Grundkapital

Die Anzahl der zum 31. Dezember 2010 ausgegebenen nennwertlosen Stammaktien der SAP AG belief sich auf 1.226.822.697 (31. Dezember 2009: 1.226.039.608). Auf jede

Aktie entfällt ein rechnerischer Nennwert von 1 €. Alle ausgegebenen Aktien sind voll eingezahlt. In der folgenden Tabelle wird die Veränderung der Anzahl sowie der Wert des Grundkapitals und der eigenen Aktien in Millionen dargestellt.

|                                                                    | Millionen Aktien |               | Mio. €       |               |
|--------------------------------------------------------------------|------------------|---------------|--------------|---------------|
|                                                                    | Grundkapital     | Eigene Aktien | Grundkapital | Eigene Aktien |
| <b>1. Januar 2008</b>                                              | <b>1.246</b>     | <b>-48</b>    | <b>1.246</b> | <b>-1.734</b> |
| Ausgabe neuer Aktien unter anteilsbasierten Vergütungsprogrammen   | 1                | 0             | 1            | 0             |
| Erwerb eigener Aktien                                              | 0                | -14           | 0            | -487          |
| Einzug eigener Aktien                                              | -21              | 21            | -21          | 744           |
| Ausgabe eigener Aktien unter anteilsbasierten Vergütungsprogrammen | 0                | 3             | 0            | 115           |
| <b>31. Dezember 2008</b>                                           | <b>1.226</b>     | <b>-38</b>    | <b>1.226</b> | <b>-1.362</b> |
| Ausgabe neuer Aktien unter anteilsbasierten Vergütungsprogrammen   | 0                | 0             | 0            | 0             |
| Ausgabe eigener Aktien unter anteilsbasierten Vergütungsprogrammen | 0                | 1             | 0            | 42            |
| <b>31. Dezember 2009</b>                                           | <b>1.226</b>     | <b>-37</b>    | <b>1.226</b> | <b>-1.320</b> |
| Ausgabe neuer Aktien unter anteilsbasierten Vergütungsprogrammen   | 1                | 0             | 1            | 0             |
| Erwerb eigener Aktien                                              | 0                | -6            | 0            | -220          |
| Ausgabe eigener Aktien unter anteilsbasierten Vergütungsprogrammen | 0                | 4             | 0            | 158           |
| <b>31. Dezember 2010</b>                                           | <b>1.227</b>     | <b>-39</b>    | <b>1.227</b> | <b>-1.382</b> |

Der Posten „Ausübung von Aktienoptionen und Wandlungsrechten aus Wandelschuldverschreibungen im Rahmen einer Kapitalerhöhung“ bezieht sich auf die Ausübung von Rechten, die Mitarbeitern im Rahmen von bestimmten anteilsbasierten Vergütungsprogrammen gewährt wurden, sowie die Aktien, die Mitarbeiter im Rahmen des Share Matching Plan 2010 erworben haben (siehe Textziffer (28)).

### Genehmigtes Kapital

Gemäß der Satzung der SAP AG ist der Vorstand berechtigt, das Grundkapital durch die Ausgabe neuer Stammaktien wie folgt zu erhöhen:

- Um bis zu insgesamt 250 Mio. € gegen Bareinlage bis zum 7. Juni 2015 (Genehmigtes Kapital Ia). Die neuen Aktien sind den bestehenden Aktionären zum Bezug anzubieten.
- Um bis zu insgesamt 250 Mio. € gegen Bar- oder Sacheinlage bis zum 7. Juni 2015 (Genehmigtes Kapital IIa). Bei dieser Erhöhung ist der Vorstand unter bestimmten Bedingungen berechtigt, mit Zustimmung des Aufsichtsrats das Bezugsrecht der Aktionäre auszuschließen.
- Um bis zu insgesamt 30 Mio. € gegen Bar- oder Sacheinlage bis zum 7. Juni 2015 (Genehmigtes Kapital III). Die neuen Aktien sind ausschließlich für anteilsbasierte Vergütungsprogramme (als Mitarbeiteraktien) bestimmt. Das Bezugsrecht der Aktionäre ist ausgeschlossen.

---

### **Bedingtes Kapital**

Das Grundkapital der SAP AG ist Gegenstand einer bedingten Erhöhung. Die bedingte Kapitalerhöhung wird nur insoweit durchgeführt, wie die Inhaber von Optionsscheinen oder Wandlungsrechten, die wir im Rahmen verschiedener anteilsbasierter Vergütungsprogramme ausgegeben haben (siehe Textziffer (28)), von ihren Options- oder Wandlungsrechten Gebrauch machen. Das bedingte Kapital belief sich zum 31. Dezember 2010 auf 207 Mio. € (2009: 208 Mio. €), eingeteilt in 207 Millionen Aktien (2009: 208 Millionen Aktien).

### **Agien**

Die Agien bestehen aus dem bei der Ausgabe von Aktien über den rechnerischen Nennwert hinaus gezahlten Aufschlag. Sie resultieren hauptsächlich aus der Ausgabe von Stammaktien, aus Transaktionen mit eigenen Aktien sowie aus anteilsbasierten Vergütungsprogrammen.

### **Gewinnrücklagen**

Die Gewinnrücklagen enthalten die einbehaltenen Gewinne nach Steuern aus Vorperioden sowie die unrealisierten Pensionsaufwendungen. Unrealisierte Pensionsaufwendungen umfassen versicherungsmathematische Gewinne und Verluste aus leistungsorientierten Pensionsplänen und ähnlichen Verpflichtungen.

### **Eigene Aktien**

Am 8. Juni 2010 hat die Hauptversammlung den Vorstand der SAP AG ermächtigt, bis zum 30. Juni 2013 bis zu 120 Millionen Aktien der Gesellschaft zu erwerben, mit der Maßgabe, dass die zu erwerbenden Aktien zusammen mit anderen zuvor erworbenen Aktien der Gesellschaft 10 % des Grundkapitals der SAP AG nicht übersteigen. Obwohl eigene Aktien rechtlich als im Umlauf befindlich anzusehen sind, entstehen aus ihnen keine Dividenden- oder Stimmrechte. Wir sind berechtigt, eigene Aktien einzuziehen, wiederzuveräußern oder zur Bedienung von Bezugs- und Wandlungsrechten zu verwenden, die im Rahmen von anteilsbasierten Vergütungsprogrammen ausgegeben wurden. Darüber hinaus sind wir berechtigt, eigene Aktien für den Erwerb von Unternehmen einzusetzen.

In den Geschäftsjahren 2010, 2009 und 2008 haben wir keine American Depositary Receipts (ADRs) erworben. Jedes ADR repräsentiert eine Stammaktie der SAP AG. Am 31. Dezember 2010, 2009 und 2008 befanden sich keine ADRs der SAP im Bestand der Gesellschaft.

### **Sonstiges**

Die insgesamt an die Aktionäre der SAP AG ausschüttbaren Dividenden bemessen sich gemäß dem deutschen Aktiengesetz nach dem Bilanzgewinn, der im handelsrechtlichen Jahresabschluss der SAP AG ausgewiesen wird. Der Vorstand und der Aufsichtsrat schlagen der Hauptversammlung vor, aus dem am 31. Dezember 2010 handelsrechtlich ausgewiesenen Bilanzgewinn der SAP AG eine Dividende von 0,60 € je Aktie (insgesamt voraussichtlich 713 Mio. €) auszuschütten.

In den Jahren 2009 und 2008 betrug die Dividende je Aktie jeweils 0,50 € und wurde jeweils im Folgejahr ausgeschüttet.

## **(22) Weitere Angaben zum Kapital**

### **Management der Kapitalstruktur**

Beim Management der Kapitalstruktur ist das vorrangige Ziel die Erhaltung eines starken Finanzprofils. In diesem Zusammenhang legen wir den Schwerpunkt auf das Eigenkapital, um das Vertrauen von Investoren, Kreditgebern und Kunden zu stärken und eine positive Geschäftsentwicklung sicherzustellen. Wir konzentrieren uns auf eine Kapitalstruktur, die es uns ermöglicht, unseren künftigen potenziellen Finanzierungsbedarf zu angemessenen Bedingungen über die Kapitalmärkte zu decken. Dadurch können wir ein hohes Maß an Unabhängigkeit, Sicherheit und finanzieller Flexibilität gewährleisten.

Derzeit verfügen wir über kein Kreditrating einer Ratingagentur. Wir sind bisher nicht der Ansicht, dass ein Rating einen wesentlichen Einfluss auf unsere derzeitigen oder künftigen Kreditaufnahmebedingungen oder Finanzierungsmöglichkeiten hätte.

## Kapitalstruktur

|                                | 2010          |                         | 2009          |                         | Veränderung<br>in % |
|--------------------------------|---------------|-------------------------|---------------|-------------------------|---------------------|
|                                | Mio. €        | In % der<br>Bilanzsumme | Mio. €        | In % der<br>Bilanzsumme |                     |
| Eigenkapital, gesamt           | 9.824         | 47                      | 8.491         | 63                      | 16                  |
| Kurzfristige Verbindlichkeiten | 5.149         | 25                      | 3.416         | 26                      | 51                  |
| Langfristige Verbindlichkeiten | 5.868         | 28                      | 1.467         | 11                      | 300                 |
| Verbindlichkeiten, gesamt      | 11.017        | 53                      | 4.883         | 37                      | 126                 |
| <b>Gesamtkapital</b>           | <b>20.841</b> | <b>100</b>              | <b>13.374</b> | <b>100</b>              | <b>56</b>           |

Bis 2010 waren wir überwiegend eigenkapitalfinanziert. Unser Verschuldungsgrad (Fremdkapital im Verhältnis zur Bilanzsumme) stieg jedoch Ende 2010 auf 53 % an (2009: 37 %). Dies ist hauptsächlich auf die Finanzierungsinstrumente zurückzuführen, die wir im Zusammenhang mit der Sybase-Akquisition emittiert haben (Bankdarlehen, Anleihen und Privatplatzierungen). Aus diesem Grund stieg auch der Anteil

der Finanzschulden an der Bilanzsumme per Ende 2010 auf 21 % (2009: 5 %). Die Finanzschulden beinhalten Verbindlichkeiten gegenüber Kreditinstituten, Anleihen und Privatplatzierungen. Bei der kontinuierlichen Überwachung dieser Kennzahlen bildet die Steuerung unserer Nettoliquidität einen Hauptschwerpunkt, wie aus der folgenden Tabelle hervorgeht:

## Konzernliquidität des SAP-Konzerns

| Mio. €                                                    | 2010         | 2009         | Veränderung   |
|-----------------------------------------------------------|--------------|--------------|---------------|
| Zahlungsmittel und Zahlungsmitteläquivalente              | 3.518        | 1.884        | 1.634         |
| Kurzfristige Wertpapiere und sonstige Geldanlagen         | 10           | 400          | -390          |
| <b>Gesamtkonzernliquidität</b>                            | <b>3.528</b> | <b>2.284</b> | <b>1.244</b>  |
| Kurzfristige Verbindlichkeiten gegenüber Kreditinstituten | 1            | 4            | -3            |
| <b>Nettoliquidität ersten Grades</b>                      | <b>3.527</b> | <b>2.280</b> | <b>1.247</b>  |
| Langfristige Verbindlichkeiten gegenüber Kreditinstituten | 1.106        | 2            | 1.104         |
| Schuldscheindarlehen                                      | 1.071        | 697          | 374           |
| Anleihe                                                   | 2.200        | 0            | 2.200         |
| <b>Nettoliquidität zweiten Grades</b>                     | <b>-850</b>  | <b>1.581</b> | <b>-2.431</b> |

Die Nettoliquidität ist definiert als Zahlungsmittel, Zahlungsmitteläquivalente und kurzfristige Geldanlagen abzüglich Finanzschulden (Verbindlichkeiten gegenüber Kreditinstituten, Anleihen und Privatplatzierungen). Unser Ziel lautet, generell eine positive Nettoliquidität aufrechtzuerhalten. Wir könnten von diesem Ziel jedoch für einen begrenzten Zeitraum abwei-

chen, beispielsweise aufgrund umfangreicher Unternehmenserwerbe, die den Einsatz von Finanzierungsinstrumenten erfordern. Dies ist zum 31. Dezember 2010 infolge des Erwerbs von Sybase der Fall, der mit Barmitteln und signifikanten Finanzschulden finanziert wurde. Das Fälligkeitsprofil dieser zusätzlichen Finanzschulden haben wir ausgewogen strukturiert, sodass unser Ziel, eine positive Nettoliquidität zu erreichen, unter Berücksichtigung der jeweiligen Cashflow-Planung so schnell wie möglich erreicht werden kann.

### Ausschüttungspolitik

Unser Ziel ist es, weiterhin in der Lage zu sein, durch die Ausschüttung jährlicher Dividenden und den Rückkauf von Aktien überschüssige Liquidität an unsere Aktionäre zurückzugeben. Der Betrag der künftigen Dividenden und der Umfang der künftigen Aktienrückkäufe werden mit unseren Bemühungen abgestimmt, einen adäquaten Liquiditätsstatus aufrechtzuerhalten.

In den Jahren 2010, 2009 und 2008 konnten wir aus unseren Gewinnen der Jahre 2009, 2008 und 2007 jeweils eine Dividende in Höhe von 594 Mio. € ausschütten. Neben der ausgeschütteten Dividende haben wir in den Jahren 2010 und 2008 durch den Rückkauf eigener Aktien 220 Mio. € bzw. 487 Mio. € an unsere Aktionäre zurückgeführt (2009 fanden keine Aktienrückkäufe statt).

Es bestehen Verpflichtungen zur Wiederausgabe eigener Aktien oder zur Ausgabe von Stammaktien im Zusammenhang mit unseren anteilsbasierten Vergütungsprogrammen, die in Eigenkapitalinstrumenten abgegolten werden (siehe Textziffer (28)). In allen dargestellten Perioden sind wir den Verpflichtungen aus unseren anteilsbasierten Vergütungsprogrammen mit Ausgleich durch Eigenkapitalinstrumente sowohl durch die Wiederausgabe eigener Aktien als auch durch Kapitalerhöhungen nachgekommen. Wir gehen davon aus, dass wir diese Verpflichtungen auch künftig auf diese Art und Weise erfüllen.

### (23) Sonstige finanzielle Verpflichtungen und Haftungsverhältnisse

#### Sonstige finanzielle Verpflichtungen

Zum 31. Dezember 2010 und 2009 bestanden die folgenden sonstigen finanziellen Verpflichtungen:

#### Sonstige finanzielle Verpflichtungen

| Mio. €                                                                           | 2010         | 2009       |
|----------------------------------------------------------------------------------|--------------|------------|
| <b>Verpflichtungen für Miet-, Pacht- und Operating-Leasingverträge</b>           | <b>754</b>   | <b>727</b> |
| Verpflichtungen für den Erwerb von Sachanlagen und immateriellen Vermögenswerten | 74           | 24         |
| Sonstige Kaufverpflichtungen                                                     | 387          | 223        |
| <b>Kaufverpflichtungen</b>                                                       | <b>461</b>   | <b>247</b> |
| <b>Gesamt</b>                                                                    | <b>1.215</b> | <b>974</b> |

Gegenstand der Miet-, Pacht- und Operating-Leasingverträge, die eine unkündbare Laufzeit zwischen unter 1 und 15 Jahren haben, sind hauptsächlich Büroräume, Hardware und Fahrzeuge. In geringem Umfang beinhalten die Operating-Leasingverträge Preisanpassungsklauseln (zum Beispiel basierend auf dem Verbraucherpreisindex) und Mietverlängerungsoptionen. Die vertraglichen Verpflichtungen für den Erwerb von Sachanlagen und immateriellen Vermögenswerten betreffen hauptsächlich den Bau von Bürogebäuden, Hardware, Software, Patente, Büroausstattung sowie Kaufverpflichtungen für Fahrzeuge. Die verbleibenden Verpflichtungen beziehen sich in erster Linie auf Marketing, Beratung, Wartung, Lizenzverträge und andere Verträge mit Dritten. In der Vergangenheit wurden die Kaufverpflichtungen in den meisten Fällen realisiert.

Die zum 31. Dezember 2010 bestehenden Verpflichtungen aus Miet-, Pacht- und Operating-Leasingverträgen sowie Kaufverpflichtungen gliedern sich wie folgt:

#### Sonstige finanzielle Verpflichtungen

| Mio. €               | Miet-, Pacht- und Operating-Leasingverträge | Kaufverpflichtungen |
|----------------------|---------------------------------------------|---------------------|
| Fällig 2011          | 210                                         | 305                 |
| Fällig 2012 bis 2015 | 434                                         | 122                 |
| Fällig nach 2015     | 110                                         | 34                  |
|                      | <b>754</b>                                  | <b>461</b>          |



---

Die Miet-, Pacht- und Operating-Leasingaufwendungen für das Jahr 2010 betrugen 267 Mio. € (2009: 264 Mio. €; 2008: 274 Mio. €).

### **Haftungsverhältnisse**

Die Nutzungsvereinbarungen für unsere Software beinhalten in der Regel eine Klausel zum Schutz unserer Kunden vor Ansprüchen Dritter, die mit der Behauptung geltend gemacht werden, dass unsere Software das geistige Eigentum Dritter verletzt. Darüber hinaus räumen wir in einzelnen Fällen Funktions- oder Leistungsgarantien im Rahmen von gewöhnlichen Beratungs- oder Entwicklungsverträgen ein. Ferner enthalten unsere Softwarelizenzverträge normalerweise Gewährleistungsklauseln, die besagen, dass die Software im Einklang mit dokumentierten Spezifikationen arbeitet. Diese Klauseln gelten für die folgenden sechs bis zwölf Monate ab Lieferung. Unsere Gewährleistungsverpflichtung wird auf Basis von Erfahrungswerten der Vergangenheit gebildet und ist in den sonstigen Rückstellungen enthalten (Textziffer (19b)).

Angaben zu Haftungsverhältnissen im Zusammenhang mit Rechtsstreitigkeiten befinden sich unter Textziffer (24).

### **(24) Schwebende Rechtsstreitigkeiten und Schadenersatzansprüche**

Wir sind im Rahmen unserer gewöhnlichen Geschäftsaktivitäten mit einer Vielfalt von Klagen und Gerichtsverfahren konfrontiert. Dies umfasst Klagen und Prozesse, in die von uns erworbene Unternehmen involviert sind, sowie Klagen von Kunden auf Freistellung von Ansprüchen, die gegen diese erhoben worden sind, weil sie SAP-Software nutzen. Wir werden uns weiterhin gegen alle gegen uns erhobenen Vorwürfe und Rechtsstreitigkeiten entschieden wehren. Wir bilden für solche Fälle Rückstellungen, wenn es wahrscheinlich ist, dass wir eine Verpflichtung haben, die aus einem Ereignis der Vergangenheit entstanden ist und verlässlich schätzbar ist und deren Erfüllung wahrscheinlich zum Abfluss von Ressourcen mit wirtschaftlichem Nutzen führt. Für den TomorrowNow-Rechtsstreit haben wir eine Rückstellung in Höhe von 997 Mio. € gebildet. Derzeit sind wir der Ansicht, dass der Ausgang aller anderen gegen uns vorgebrachten Klagen und Prozesse, sowohl einzeln als auch insgesamt, keine wesentliche nachteilige Auswirkung auf unsere Geschäftstätigkeit, Vermögenslage, Ertragslage und unseren

Cashflow haben wird. Die anderen gebildeten Rückstellungen sind daher auch weder einzeln noch insgesamt wesentlich. Allerdings sind diese Rechtsstreitigkeiten mit Risiken behaftet und es könnten sich daraus für die beteiligten Parteien erhebliche finanzielle Verluste und Rufschädigungen ergeben. Angesichts der mit diesen Vorgängen verbundenen erheblichen Unsicherheiten kann nicht garantiert werden, dass daraus keine wesentlichen nachteiligen Auswirkungen auf unsere Geschäftstätigkeit, Vermögenslage, Ertragslage und unseren Cashflow resultieren werden. Zudem können wir keine verlässliche Aussage zur maximalen Höhe des möglichen Verlusts machen, der sich bei einem negativen Ausgang dieser Vorgänge einstellen würde.

Die Entwicklung der für Rechtsstreitigkeiten gebildeten Rückstellungen ist Textziffer (19b) zu entnehmen.

Zu diesen Klagen und Gerichtsverfahren gehören unter anderem:

### **Rechtsstreitigkeiten im Zusammenhang mit geistigem Eigentum**

Im Oktober 2006 reichte Sky Technologies LLC mit Sitz in den USA (Sky) eine Klage gegen uns und Oracle in den USA ein. Sky behauptet, dass Produkte der SAP jeweils einen oder mehrere Ansprüche seiner fünf Patente verletzen. Die Klage lautet auf die Zahlung eines nicht konkretisierten Schadenersatzes und eine dauerhafte Unterlassung. SAP und Sky haben im September 2010 den Rechtsstreit gegen Zahlung eines Betrags, der keine wesentliche nachteilige Auswirkung auf unsere Geschäftstätigkeit, Vermögenslage, Ertragslage und unseren Cashflow hat, beigelegt.

Im Januar 2007 reichte die deutsche CSB-Systems AG (CSB) eine Klage gegen uns in Deutschland ein. CSB behauptet, dass Produkte der SAP einen oder mehrere Ansprüche eines deutschen Patents und eines deutschen Gebrauchsmusters der CSB verletzen. Die Klage lautet auf Zahlung eines vorläufigen Schadenersatzes in Höhe von 1 Mio. € und eine dauerhafte Unterlassung. CSB kann die Schadenersatzforderung im Rahmen des Verfahrens erhöhen. Im Juli 2007 hat SAP ihre Klageerwidderung eingereicht, mit der auch die Nichtigkeit des Patents und das Verfahren zur Löschung des Gebrauchsmusters beantragt wurde. In der Verhandlung hinsichtlich der Nichtigkeit des Patents im Januar 2009 wurde das Patent für

---

ungültig erklärt. Die Verhandlung über die Nichtigkeitsklage gegen das Gebrauchsmuster fand im Mai 2009 statt und das Gebrauchsmuster wurde für nichtig erklärt. Gegen diese Entscheidungen hat CSB Rechtsmittel eingelegt. Die Verhandlung über den Verletzungsvorwurf ist bis zu den Entscheidungen über die Rechtsmittel ausgesetzt worden.

Im Mai 2010 reichte die CSB-Systems International, Inc. (CSB) eine Klage gegen uns in den USA ein. CSB behauptet, dass Produkte der SAP einen oder mehrere Ansprüche eines Patents der CSB verletzen. CSB macht die Zahlung eines nicht konkretisierten Schadenersatzes geltend und verlangt eine dauerhafte Unterlassung. Es ist noch kein Gerichtstermin anberaumt worden.

Im März 2007 reichten die Oracle Corporation mit Sitz in den USA und einige ihrer Tochtergesellschaften (Oracle) eine Klage gegen TomorrowNow, Inc., ihr Mutterunternehmen SAP America, Inc. und dessen Mutterunternehmen SAP AG (SAP) in den USA ein. Oracle hat die Klage im Zeitraum 2007 bis 2009 mehrfach geändert. Gemäß der geänderten Klage werden Urheberrechtsverstöße, Verstöße gegen den Federal Computer Fraud and Abuse Act und den California Computer Data Access and Fraud Act sowie unlauterer Wettbewerb, vorsätzliche und fahrlässige Störung in Aussicht stehender wirtschaftlicher Vorteile und zivilrechtliche Verschwörung behauptet. In der Klage wird behauptet, dass SAP proprietäre und urheberrechtlich geschützte Softwareprodukte und anderes vertrauliches Material, das Oracle zur Dienstleistungserbringung für eigene Kunden entwickelt hat, unerlaubt kopiert und sich diese widerrechtlich angeeignet hat. Die Klage lautet auf Unterlassung und die Zahlung eines Schadenersatzes einschließlich der Zahlung eines Strafschadenersatzes in einem von Oracle behaupteten Umfang von mehreren Milliarden US-Dollar. Das Gerichtsverfahren fand im November 2010 statt. Bereits im Vorfeld hatten SAP AG, SAP America und TomorrowNow einige Ansprüche anerkannt. Darüber hinaus hat SAP sich gegenüber Oracle bereit erklärt, Oracle Anwaltskosten in Höhe von 120 Mio. US\$ zu ersetzen. Die Jury hat Oracle Schadenersatz in Höhe von 1,3 Mrd. US\$ zugesprochen. Das entsprechende Urteil wurde am 3. Februar 2011 ausgefertigt. Neben dem Schadenersatz erkannte es einen Anspruch auf vorprozessuale Zinsen in Höhe

von 15 Mio. US\$ zu. Ab dem Erlass des Urteils müssen auch für die im Urteil genannten Beträge nachprozessuale Zinsen gezahlt werden.

Die Jury hat ihren Spruch auf Grundlage einer hypothetischen Lizenz gefällt, das heißt welchen Betrag TomorrowNow an Oracle gezahlt hätte, wenn es mit Oracle eine Lizenzvereinbarung über die Nutzung der von TomorrowNow unrechtmäßig genutzten Urheberrechte geschlossen hätte. Vor und während des Gerichtstermins wurden von den Parteien einige Schadenersatzbeträge in das Verfahren eingeführt:

- a) Vor dem Gerichtstermin hatte Oracle einen Schadenersatz von mindestens 3,5 Mrd. US\$ aufgrund angeblich „ersparter Entwicklungskosten“ geltend gemacht. Aufgrund eines von den Beklagten eingereichten Antrags hat das Gericht die Geltendmachung dieses Anspruchs abgelehnt. Oracle hat jedoch die Möglichkeit, gegen diese Entscheidung in Berufung zu gehen.
- b) Im Laufe der Gerichtsverhandlung hat Oracles Sachverständiger dem Gericht einen Betrag in Höhe von 408 Mio. US\$ auf Grundlage eines entgangenen Gewinns bei Oracle und der Abschöpfung von unrechtmäßig erlangtem Gewinn genannt.
- c) Während der Gerichtsverhandlung hatten Mitglieder des Managements von Oracle in ihren Zeugenaussagen Beträge von bis zu 5 Mrd. US\$ genannt. Oracles Sachverständiger nannte eine Schätzung in Höhe von mindestens 1,655 Mrd. US\$ als Schadenersatz auf Grundlage der Theorie einer hypothetischen Lizenz. Oracles Anwalt bat die Jury um die Zuerkennung eines Schadenersatzbetrages „irgendwo zwischen 1,65 Mrd. und 3 Mrd. US\$“.
- d) Während der Gerichtsverhandlung hat der Sachverständige von TomorrowNow und SAP einen Betrag in Höhe von 28 Mio. US\$, basierend auf dem bei Oracle entgangenen Gewinn und der Abschöpfung von unrechtmäßig erlangtem Gewinn, oder alternativ einen Betrag in Höhe von 40,6 Mio. US\$ auf Grundlage der Theorie einer hypothetischen Lizenz genannt. Der Beklagtenanwalt ersuchte die Jury um Zuerkennung eines Schadenersatzes in Höhe von 28 Mio. US\$.

Im Vorfeld der Gerichtsverhandlung und während der Verhandlung waren wir der Ansicht – und sind es nach wie vor –, dass die Theorie einer hypothetischen Lizenz keine geeignete Basis für die Berechnung des Schadenersatzes ist. Stattdessen sollte unseres Erachtens der Schadenersatz auf entgangenen

---

Gewinn und die Abschöpfung des unrechtmäßig erlangtem Gewinns basieren. Zum Zeitpunkt dieses Berichts hat SAP Post Trial Motions eingereicht, mit dem Antrag, dass die Richterin den Juryspruch ändert. Die Richterin hat hierüber allerdings noch nicht entschieden. Abhängig von dem Ausgang der Entscheidung wird die SAP entscheiden, ob sie Berufung einlegen wird.

Darüber hinaus wurde SAP im Juni 2007 davon in Kenntnis gesetzt, dass das US-Justizministerium eine Untersuchung zu einigen mit diesem Verfahren zusammenhängenden Punkten eingeleitet und von SAP und TomorrowNow Unterlagen angefordert hat. SAP und TomorrowNow kooperieren und beantworten die ursprünglichen und zusätzlichen Fragen und Dokumentenanforderungen des Justizministeriums.

Im April 2007 reichte die Versata Software, Inc., vormalis Trilogy Software Inc., (Versata) mit Sitz in den USA eine Klage gegen uns in den USA ein. In der Klage behauptet Versata, dass Produkte und Dienstleistungen der SAP einen oder mehrere Ansprüche von fünf von Versata gehaltenen Patenten verletzen. Mit der Klage macht Versata einen nicht konkretisierten Schadenersatz und eine dauerhafte Unterlassung geltend. Im August 2009 fand ein Gerichtstermin statt. In diesem hat die Jury eine Entscheidung zugunsten Versatas getroffen und Versata einen Schadenersatz in Höhe von 138,6 Mio. US\$ zugesprochen. Das Gericht hat im Januar 2011 den Juryspruch auf Schadenersatz aufgehoben und einen neuen Prozess hinsichtlich der Höhe des Schadenersatzes auf den April 2011 anberaumt.

Im August 2007 reichte die elcommerce. com, Inc. (elcommerce) mit Sitz in den USA gegen uns in den USA eine Klage ein. elcommerce behauptet, dass Produkte und Dienstleistungen der SAP einen oder mehrere Ansprüche eines von elcommerce gehaltenen Patents verletzen. Mit der Klage macht elcommerce einen nicht konkretisierten Schadenersatz und eine dauerhafte Unterlassung geltend. Das angerufene Gericht im östlichen Bezirk von Texas hat dem Antrag der SAP, den Rechtsstreit an ein Gericht in Pennsylvania zu verweisen, stattgegeben. Die Gerichtsverhandlung in Pennsylvania ist noch nicht terminiert worden.

Im Mai 2008 reichte die InfoMentis, Inc. (InfoMentis) mit Sitz in den USA eine Klage gegen uns in den USA ein. InfoMentis behauptet die Verletzung von Urheberrecht und unlauteren Wettbewerb. Mit der Klage macht InfoMentis einen nicht konkretisierten Schadenersatz und eine dauerhafte Unterlassung geltend. Die SAP hat ihre Klageerwidderung im August 2008 eingereicht. SAP und InfoMentis haben den Rechtsstreit im August 2010 gegen Zahlung eines Betrags, der keine wesentliche nachteilige Auswirkung auf unsere Geschäftstätigkeit, Vermögenslage, Ertragslage und unseren Cashflow hat, beigelegt.

Im Februar 2010 reichte TecSec, Inc. mit Sitz in den USA eine Klage gegen die SAP, Sybase, IBM sowie diverse weitere Beklagte in den USA ein. TecSec behauptet, dass Produkte der SAP einen oder mehrere Ansprüche von fünf ihrer Patente verletzen. Mit der Klage macht TecSec einen nicht konkretisierten Schadenersatz und eine dauerhafte Unterlassung geltend. Es ist noch kein Gerichtstermin anberaumt worden. Die Verfahren sind bis auf eines gegen IBM ausgesetzt worden.

Im April 2010 hat SAP in den USA eine Feststellungsklage gegen Wellogix Inc. und Wellogix Technology Licensing LLC (Wellogix) eingereicht. Mit der Klage soll festgestellt werden, dass fünf von Wellogix gehaltene Patente nichtig sind und/oder nicht von SAP verletzt werden. Es ist noch kein Gerichtstermin anberaumt worden. Das Verfahren ist bis zur Entscheidung über die beim US-amerikanischen Patent- und Markenamt beantragte Neubegutachtung der Patente ausgesetzt.

#### **Andere Rechtsstreitigkeiten**

Im April 2008 reichte die Systems Applications Consultants (PTY) Limited mit Sitz in Südafrika (Securinfo) eine Klage gegen uns in Südafrika ein. Mit der Klage macht Securinfo wegen eines behaupteten Verlebens zum Vertragsbruch eines Vertriebsvertrags zwischen einer Tochtergesellschaft der SAP und Securinfo gegenüber SAP einen Schadenersatz in Höhe von rund 610 Mio. € nebst Zinsen geltend. Im September 2009 hat SAP einen Antrag auf Klageabweisung gestellt. Der Gerichtstermin ist auf den Juni 2011 festgesetzt worden.

Im März 2008 reichten Waste Management, Inc. und USA Waste Management Resources L.L.C. (Waste Management) mit Sitz in den USA eine Klage gegen die SAP in den USA

---

ein. Waste Management brachte mehrere Klagegründe vor, darunter arglistige Täuschung, fahrlässige Vorspiegelung falscher Tatsachen und Vertragsverletzung. Im April 2010 haben SAP und Waste Management den Rechtsstreit gegen Zahlung eines Betrags, der keine wesentliche nachteilige Auswirkung auf unsere Geschäftstätigkeit, Vermögenslage, Ertragslage und unseren Cashflow hat, beigelegt.

## **(25) Finanzielle Risikofaktoren**

Wir sind verschiedenen finanziellen Risiken ausgesetzt, zum Beispiel Marktrisiken (darunter Wechselkurs-, Zins- und Aktienkursrisiken) sowie dem Kreditrisiko und dem Liquiditätsrisiko.

### **Marktrisiken**

#### **a) Wechselkursrisiko**

Das Wechselkursrisiko ist das Risiko eines Verlusts infolge nachteiliger Veränderungen der Wechselkurse. Gemäß IFRS treten Wechselkursrisiken bei monetären Finanzinstrumenten auf, die auf eine fremde Währung lauten, das heißt auf eine andere Währung als die funktionale Währung, wobei die fremde Währung die relevante Risikovariablen darstellt. Translationsbedingte Risiken bleiben unberücksichtigt.

Als global tätiges Unternehmen sind wir im Rahmen unserer operativen Geschäftstätigkeit Risiken aus Wechselkursänderungen ausgesetzt. Da die einzelnen Konzerngesellschaften ihr operatives Geschäft hauptsächlich in ihrer jeweiligen funktionalen Währung tätigen, schätzen wir unser Risiko aus Wechselkursschwankungen aus der laufenden operativen Geschäftstätigkeit als unwesentlich ein. Gelegentlich wickeln wir Geschäftsvorfälle jedoch in einer anderen Währung als unserer funktionalen Währung ab, sodass Forderungen, Verbindlichkeiten und andere monetäre Bilanzposten in Fremdwährung entstehen. Zur Minderung des damit verbundenen Wechselkursrisikos werden diese in der Mehrzahl wie in Textziffer (26) beschrieben abgesichert.

In Ausnahmefällen führt die Abwicklung von Geschäftsvorfällen in einer anderen Währung als unserer funktionalen Währung auch zu eingebetteten Fremdwährungsderivaten, die getrennt und aufwands- oder ertragswirksam zum beizulegenden Zeitwert bewertet werden müssen.

Auch die erwarteten konzerninternen Cashflows in Fremdwährung, die aus konzerninternen Lizenzzahlungen der SAP-Konzerngesellschaften resultieren, beinhalten ein Wechselkursrisiko für die SAP AG. Dies führt zu einer Bündelung des Wechselkursrisikos bei der SAP AG in Deutschland, da die Lizenzzahlungen überwiegend auf die jeweilige lokale Währung der Tochterunternehmen lauten, die funktionale Währung der SAP AG jedoch der Euro ist. Die höchsten Wechselkursrisiken bestehen deshalb bei den Währungen von Tochterunternehmen, die umfangreiche Geschäfte tätigen. Dies sind beispielsweise US-Dollar, Pfund Sterling, japanischer Yen, Schweizer Franken, kanadischer Dollar und australischer Dollar.

Unsere Investitions- und Finanzierungsaktivitäten sind keinem signifikanten Wechselkursrisiko ausgesetzt, da alle Aktivitäten in der jeweiligen funktionalen Währung durchgeführt werden.

#### **b) Zinsrisiko**

Zinsrisiken ergeben sich aus Änderungen von Marktzinssätzen, die wiederum Änderungen des beizulegenden Zeitwertes von festverzinslichen Instrumenten und der Höhe der Zinsaufwendungen und -erträge für variabel verzinsliche Instrumente zur Folge haben können. Dieses Zinsrisiko besteht für unsere Investitions- und Finanzierungsaktivitäten hauptsächlich in Euro und US-Dollar.

Zum 31. Dezember 2010 sind unsere liquiden Mittel hauptsächlich in kurzfristige Festgelder mit fixer Verzinsung und Geldmarktfonds mit variabler Verzinsung angelegt, die als Zahlungsmitteläquivalente gehalten werden. Da wir die am Jahresende angelegten kurzfristigen Festgelder mit fixer Verzinsung nicht zum beizulegenden Zeitwert bilanzieren, unterliegen wir mit unseren variabel verzinslichen Geldmarktfonds folglich nur einem zinsbedingten Cashflow-Risiko hauptsächlich in der Eurozone und in den USA.

---

2010 umfasste unsere Finanzierungstätigkeit die Ausgabe von vier Anleihetranchen, ein Akquisitionsdarlehen, ein weiteres Darlehen und zwei Privatplatzierungen in den USA (Einzelheiten siehe Textziffer (18b)). Alle vier Anleihetranchen mit einem Gesamtvolumen von 2,2 Mrd. € weisen einen festen Kupon aus. Gleiches gilt für die Privatplatzierungen in den USA mit einem Volumen von 500 Mio. US\$. Das Akquisitionsdarlehen zur Finanzierung des Erwerbs von Sybase, das im dritten Quartal 2010 von 2,64 Mrd. € auf 1 Mrd. € reduziert wurde, wird in Anlehnung an den gültigen EURIBOR variabel verzinst, woraus sich ein Cashflow-Risiko ergibt.

Im Mittelpunkt unserer Finanzierungstätigkeit stand 2009 die Platzierung des SSD mit einem Gesamtvolumen von 697 Mio. €. Das SSD besteht aus einer festverzinslichen Tranche in Höhe von 149,5 Mio. € und einer variabel verzinslichen Tranche in Höhe von 547,5 Mio. €, die ein Cashflow-Risiko begründet, da die Zinszahlungen auf dem gültigen EURIBOR basieren.

### **c) Aktienkursrisiko**

Das Aktienkursrisiko ist das Risiko eines Verlusts infolge nachteiliger Veränderungen auf den Aktienmärkten. Wir sind diesem Risiko in Bezug auf unsere Eigenkapitalinstrumente und unsere anteilsbasierten Vergütungsprogramme ausgesetzt.

### **Kreditrisiko**

Ein Kreditrisiko entsteht, wenn eine Vertragspartei ihren vertraglichen Verpflichtungen zur Rückzahlung oder zur Bedienung von Schulden nicht nachkommt, und es dadurch zu einem wirtschaftlichen Verlust des eingesetzten Kapitals oder des mit dem Kapitaleinsatz verbundenen finanziellen Nutzens kommt. Wir haben eine Vereinbarung mit einem Versicherer zur Absicherung von Teilen unserer Forderungen aus Lieferungen und Leistungen gegen Kreditrisiken abgeschlossen. Mit Ausnahme davon haben wir keine wesentlichen Vereinbarungen zur Reduzierung des Gesamtkreditrisikos, wie beispielsweise Globalverrechnungsabkommen, geschlossen. Daher entspricht das maximale Kreditrisiko dem Gesamtbetrag der Zahlungsmittel und Zahlungsmitteläquivalente, kurzfristigen Finanzinvestitionen, Ausleihungen und sonstigen finanziellen Forderungen und derivativen finanziellen Vermögenswerte.

### **Liquiditätsrisiko**

Liquiditätsrisiken entstehen aus der Unfähigkeit, finanzielle Verpflichtungen, beispielsweise gegenüber Lieferanten oder Mitarbeitern, zu erfüllen. Die nachstehende Tabelle zeigt eine Fälligkeitsanalyse der vertraglich vereinbarten Restlaufzeiten aller unserer zum 31. Dezember 2010 bestehenden finanziellen Verbindlichkeiten. Die in nachstehender Tabelle gezeigten finanziellen Verbindlichkeiten, für die vom Vertragspartner jederzeit eine Rückzahlung verlangt werden kann, sind dem frühesten Fälligkeitstermin zugewiesen. Die variablen Zinszahlungen wurden mit dem letzten vor dem 31. Dezember 2010 festgelegten maßgeblichen Zinssatz berechnet. Da wir unsere Derivate brutto ausgleichen, zeigen wir separat die mit unseren Fremdwährungs- und Zinsderivaten verbundenen Zahlungsausgänge und -einträge – unabhängig davon, ob das Derivat einen negativen Zeitwert aufweist oder nicht. Die Zahlungsabflüsse für die Fremdwährungsderivate werden mit dem entsprechenden Terminkurs umgerechnet.

Die Cashflows für noch nicht erfasste, aber vertraglich vereinbarte finanzielle Verpflichtungen gehen aus Textziffer (24) hervor.

## Restlaufzeiten finanzieller Verbindlichkeiten

| Mio. €                                                             | Buchwert   |        | Vertragliche Zahlungsströme |      |      |      |           |
|--------------------------------------------------------------------|------------|--------|-----------------------------|------|------|------|-----------|
|                                                                    | 31.12.2010 | 2011   | 2012                        | 2013 | 2014 | 2015 | nach 2015 |
| <b>Nicht derivative finanzielle Verbindlichkeiten</b>              |            |        |                             |      |      |      |           |
| – Verbindlichkeiten aus Lieferungen und Leistungen                 | –699       | –699   | 0                           | 0    | 0    | 0    | 0         |
| – Finanzielle Verbindlichkeiten                                    | –4.445     | –145   | –2.220                      | –667 | –824 | –253 | –695      |
| <b>Derivative finanzielle Verbindlichkeiten und Vermögenswerte</b> |            |        |                             |      |      |      |           |
| – Derivative finanzielle Verbindlichkeiten                         |            |        |                             |      |      |      |           |
| Fremdwährungsderivate ohne designierte Sicherungsbeziehung         | –109       |        |                             |      |      |      |           |
| – Zahlungsmittelabfluss                                            |            | –883   | –9                          | –9   | –9   | –9   | –42       |
| – Zahlungsmittelzufluss                                            |            | 852    | 0                           | 0    | 0    | 0    | 0         |
| Fremdwährungsderivate mit designierter Sicherungsbeziehung         | –27        |        |                             |      |      |      |           |
| – Zahlungsmittelabfluss                                            |            | –360   | –38                         | 0    | 0    | 0    | 0         |
| – Zahlungsmittelzufluss                                            |            | 333    | 36                          | 0    | 0    | 0    | 0         |
| Zinsderivate mit designierter Sicherungsbeziehung                  | –10        |        |                             |      |      |      |           |
| – Zahlungsmittelabfluss                                            |            | –12    | –9                          | –5   | –3   | 0    | 0         |
| – Zahlungsmittelzufluss                                            |            | 5      | 4                           | 2    | 1    | 0    | 0         |
| – Derivative finanzielle Vermögenswerte                            |            |        |                             |      |      |      |           |
| Fremdwährungsderivate ohne designierte Sicherungsbeziehung         | 80         |        |                             |      |      |      |           |
| – Zahlungsmittelabfluss                                            |            | –4.502 | 0                           | 0    | 0    | 0    | 0         |
| – Zahlungsmittelzufluss                                            |            | 4.590  | 0                           | 0    | 0    | 0    | 0         |
| Fremdwährungsderivate mit designierter Sicherungsbeziehung         | 3          |        |                             |      |      |      |           |
| – Zahlungsmittelabfluss                                            |            | –62    | 0                           | 0    | 0    | 0    | 0         |
| – Zahlungsmittelzufluss                                            |            | 64     | 0                           | 0    | 0    | 0    | 0         |

## Restlaufzeiten finanzieller Verbindlichkeiten

| Mio. €                                                             | Buchwert   |        | Vertragliche Zahlungsströme |      |      |      |           |
|--------------------------------------------------------------------|------------|--------|-----------------------------|------|------|------|-----------|
|                                                                    | 31.12.2009 | 2010   | 2011                        | 2012 | 2013 | 2014 | nach 2014 |
| <b>Nicht derivative finanzielle Verbindlichkeiten</b>              |            |        |                             |      |      |      |           |
| – Verbindlichkeiten aus Lieferungen und Leistungen                 | –479       | –479   | 0                           | 0    | 0    | 0    | 0         |
| – Finanzielle Verbindlichkeiten                                    | –749       | –60    | –26                         | –441 | –11  | –281 | 0         |
| <b>Derivative finanzielle Verbindlichkeiten und Vermögenswerte</b> |            |        |                             |      |      |      |           |
| – Derivative finanzielle Verbindlichkeiten                         |            |        |                             |      |      |      |           |
| Fremdwährungsderivate ohne designierte Sicherungsbeziehung         | –109       |        |                             |      |      |      |           |
| – Zahlungsmittelabfluss                                            |            | –2.136 | –3                          | –3   | –3   | –2   | –13       |
| – Zahlungsmittelzufluss                                            |            | 2.053  | 0                           | 0    | 0    | 0    | 0         |
| Fremdwährungsderivate mit designierter Sicherungsbeziehung         | –12        |        |                             |      |      |      |           |
| – Zahlungsmittelabfluss                                            |            | –384   | 0                           | 0    | 0    | 0    | 0         |
| – Zahlungsmittelzufluss                                            |            | 371    | 0                           | 0    | 0    | 0    | 0         |
| Zinsderivate mit designierter Sicherungsbeziehung                  | –5         |        |                             |      |      |      |           |
| – Zahlungsmittelabfluss                                            |            | –12    | –12                         | –9   | –5   | –3   | 0         |
| – Zahlungsmittelzufluss                                            |            | 4      | 4                           | 3    | 1    | 1    | 0         |
| – Derivative finanzielle Vermögenswerte                            |            |        |                             |      |      |      |           |
| Fremdwährungsderivate ohne designierte Sicherungsbeziehung         | 41         |        |                             |      |      |      |           |
| – Zahlungsmittelabfluss                                            |            | –1.853 | 0                           | 0    | 0    | 0    | 0         |
| – Zahlungsmittelzufluss                                            |            | 1.890  | 0                           | 0    | 0    | 0    | 0         |
| Fremdwährungsderivate mit designierter Sicherungsbeziehung         | 3          |        |                             |      |      |      |           |
| – Zahlungsmittelabfluss                                            |            | –160   | 0                           | 0    | 0    | 0    | 0         |
| – Zahlungsmittelzufluss                                            |            | 163    | 0                           | 0    | 0    | 0    | 0         |

Die Zunahme der Zahlungsmittelabflüsse für unsere nicht derivativen finanziellen Verbindlichkeiten im Vergleich zum Jahresende 2009 ist hauptsächlich auf die Finanzierungstätigkeiten im Jahr 2010 und dafür zu entrichtende Zinszahlungen zurückzuführen (Einzelheiten siehe Textziffer (18b)).

Der Anstieg der Zahlungsmittelab- und -zuflüsse für unsere Fremdwährungsderivate ohne designierte Sicherungsbeziehung liegt am Anstieg des Volumens der abgesicherten monetären Vermögenswerte und Verbindlichkeiten, hauptsächlich in US-Dollar.

---

## **(26) Management finanzieller Risiken**

Unsere Marktrisiken (Wechselkurs-, Zins- und Aktienkursrisiken) sowie unser Kredit- und Liquiditätsrisiko steuern wir auf konzernweiter Basis über unsere Treasury-Abteilung. Die Risikomanagement- und Absicherungsstrategie wird durch unsere Treasury-Richtlinie und andere interne Richtlinien geregelt und unterliegt regelmäßigen internen Risikoanalysen. Ausgewählte Derivate werden ausschließlich zur Sicherung dieser Risiken eingesetzt, nicht aber für Spekulationszwecke, das heißt, ohne eine entsprechende zugrunde liegende Transaktion schließen wir keine Derivate ab.

In den folgenden Abschnitten werden das Management der einzelnen finanziellen Risiken und der Umfang dieser Risiken näher erläutert. Zur Darstellung des Marktrisikos sind gemäß IFRS 7 *Finanzinstrumente: Angaben (IFRS 7)* Sensitivitätsanalysen erforderlich, aus denen hervorgeht, wie sich hypothetische Änderungen der relevanten Risikovariablen auf unseren Gewinn oder die anderen im Eigenkapital erfassten Wertänderungen ausgewirkt hätten. Die periodischen Auswirkungen ermitteln wir, indem wir die hypothetischen Änderungen der Risikovariablen auf den Bestand der Finanzinstrumente zum Berichtszeitpunkt beziehen.

### **Management des Wechselkursrisikos**

Wir überwachen kontinuierlich potenzielle Währungsrisiken für monetäre Bilanzpositionen sowie erwartete Transaktionen und verfolgen eine konzernweite Risikomanagement-Strategie mit dem vorrangigen Ziel, die Volatilität unseres Ergebnisses zu reduzieren.

### **Währungssicherungen ohne designierte Sicherungsbeziehung**

Währungssicherungskontrakte zur Absicherung von Wechselkursrisiken aus monetären Vermögenswerten und Verbindlichkeiten in Fremdwährung, die sich aus der laufenden Geschäftstätigkeit ergeben, werden nicht als Sicherungsbeziehung designiert. Grund dafür ist, dass die realisierten Währungsgewinne und -verluste aus den zugrunde liegenden Positionen in den gleichen Perioden ergebniswirksam erfasst werden wie die Gewinne und Verluste aus den Derivaten.

Darüber hinaus sind in den Währungssicherungen ohne designierte Sicherungsbeziehung auch Fremdwährungsderivate enthalten, die in einen nicht derivativen Basisvertrag eingebettet sind, vom Basisvertrag getrennt und separat als Derivate bilanziert werden, wenn die Bestimmungen des IAS 39 erfüllt sind.

### **Währungssicherungen mit designierter Sicherungsbeziehung – Cashflow-Hedges**

Um die erwarteten Fremdwährungszahlungen (Lizenzen) der ausländischen Tochterunternehmen gegen die beschriebenen Wechselkursrisiken abzusichern, nutzen wir derivative Finanzinstrumente, in erster Linie Devisentermingeschäfte. Solche Absicherungen decken einen festgelegten Anteil des erwarteten Risikos ab und haben einen zeitlichen Horizont von bis zu 15 Monaten. In diesem Zusammenhang eliminieren wir insbesondere die Zinskomponente und designieren lediglich den Kassakurs der Devisentermingeschäfte als Sicherungsinstrument. Abgesichert werden so die erwarteten Cashflows aus den Tochtergesellschaften, in denen wir umfangreiche Geschäfte tätigen. Hierzu gehören die USA, Großbritannien, Japan, die Schweiz, Kanada und Australien. Die Laufzeiten der eingesetzten derivativen Fremdwährungsinstrumente betragen üblicherweise höchstens 15 Monate. Sie werden gegebenenfalls erneuert, um eine permanente Deckung der zu erwartenden Lizenzzahlungen bis zum Zahlungsseingang zu gewährleisten.

Im Geschäftsjahr 2010 wurden Nettoverluste von insgesamt 55 Mio. € (2009: Nettoverluste von 18 Mio. €; 2008: Nettoverluste von 32 Mio. €) aus der Änderung der Komponente des Derivats, das als Sicherungsinstrument designiert ist, erfolgsneutral in den anderen im Eigenkapital erfassten Wertänderungen erfasst.

In den Geschäftsjahren 2010 und 2009 wurde bei keiner der ursprünglich als hochwahrscheinlich erachteten Transaktionen, die als Grundgeschäfte in Cashflow-Hedges zur Absicherung von Fremdwährungspositionen designiert sind, später mit dem Eintritt nicht mehr gerechnet. Aus diesem Grund kam es nicht zu einer Auflösung von Cashflow-Hedge-Beziehungen. Ebenso wurden für diese Sicherungsgeschäfte 2010 und 2008 keine und 2009 nur unwesentliche Ineffektivitäten festgestellt. Aufgrund der Realisierung der Grundgeschäfte wurden 2010 Nettoverluste von 44 Mio. € (2009: Nettoverluste von 37 Mio. €; 2008: Nettoverluste von 16 Mio. €) aus den anderen im Eigenkapital erfassten Wertänderungen ausgebucht und erfolgswirksam erfasst. Grundsätzlich gehen wir davon aus, dass die Cashflows der erwarteten Transaktionen tatsächlich anfallen werden und somit in einem Zeitraum von 15 Monaten ab dem Bilanz-



---

stichtag monatlich unser Ergebnis beeinflussen werden. Vermutlich werden wir 18 Mio. € der Nettoverluste, die im Geschäftsjahr 2010 direkt als andere im Eigenkapital erfasste Wertänderungen ausgewiesen wurden, im Geschäftsjahr 2011 ergebniswirksam verbuchen.

### Wechselkursrisikoposition

Im Einklang mit unserer internen Risikoberichterstattung verwenden wir zur Quantifizierung unserer Risikopositionen und zur Steuerung des Wechselkursrisikos das Value-at-Risk-Konzept. Unsere Berechnung des Value-at-Risk bezieht sich nicht nur auf sämtliche Finanzinstrumente in Fremdwährung, sondern auch auf geplante konzerninterne Transaktionen, die nicht in den Anwendungsbereich von IFRS 7 fallen. Somit erfolgt die Berechnung nicht gemäß den Anforderungen von IFRS 7. Daher verzichten wir auf die Angabe unserer Value-at-Risk-Analyse. Um den Umfang unserer Wechselkursrisikoposition darzustellen, geben wir eine währungsbezogene Sensitivitätsanalyse auf Grundlage der folgenden Annahmen an:

- Da wir Geschäftsvorfälle üblicherweise in der funktionalen Währung des jeweiligen Konzernunternehmens abwickeln, lautet die Mehrheit unserer originären monetären Finanzinstrumente wie Zahlungsmittel und Zahlungsmitteläquivalente, Forderungen und Verbindlichkeiten aus Lieferungen und Leistungen, Ausleihungen an Betriebsangehörige und an Dritte, Verbindlichkeiten gegenüber Kreditinstituten und sonstige finanzielle Verbindlichkeiten auf die funktionale Währung des jeweiligen Konzernunternehmens. Somit sind solche Transaktionen fast nicht mit Wechselkursrisiken behaftet. In Sonderfällen und bei bestimmten wirtschaftlichen Rahmenbedingungen werden operative Geschäftsvorfälle und Finanzierungstätigkeiten nicht in der jeweiligen funktionalen Währung abgebildet, sodass sich hieraus ein Währungsrisiko für die betreffenden monetären Instrumente ergibt. Bei einer Absicherung von Cashflows gegen Währungsrisiken werden diese auf fremde Währung lautenden Finanzinstrumente durch Devisentermingeschäfte wirtschaftlich betrachtet in die funktionale Währung umgewandelt. Deshalb haben Wechselkursschwankungen im Zusammenhang mit unseren originären monetären Finanzinstrumenten keine wesentlichen Auswirkungen auf die Ertragslage oder das Eigenkapital.
- Erträge oder Aufwendungen aus den oben genannten originären monetären Finanzinstrumenten werden überwiegend in der funktionalen Währung des jeweiligen Unternehmens

erfasst. Deshalb haben Wechselkursschwankungen in diesem Zusammenhang keine wesentlichen Auswirkungen auf die Ertragslage oder das Eigenkapital.

- Unsere freistehenden Sicherungsinstrumente gleichen die wechsellkursbedingten Wertänderungen der gegen Währungsrisiken abzusichernden Grundgeschäfte nahezu vollständig in derselben Periode in der Konzern-Gewinn- und Verlustrechnung aus. Demzufolge sind auch diese Finanzinstrumente nicht mit Wechselkursrisiken behaftet und wirken sich nicht auf die Ertragslage oder das Eigenkapital aus.

Somit entstehen Wechselkursrisiken nur in den folgenden Fällen:

- bei Derivaten in Cashflow-Hedge-Sicherungsbeziehungen und
- bei eingebetteten Fremdwährungsderivaten.

Hinsichtlich des Nominalvolumens der Derivate in Cashflow-Hedge-Sicherungsbeziehungen und der eingebetteten Fremdwährungsderivate sind die Daten zum Jahresende nicht für das Gesamtjahr repräsentativ. Unser Wechselkursrisiko im Jahr 2010 bezog sich auf Nominalvolumina in Höhe von durchschnittlich 881 Mio. €, die von einem Höchstwert von 954 Mio. € bis zu einem Tiefstwert von 815 Mio. € reichten. Letzterer entspricht dem Stand am Jahresende.

Wie oben ausgeführt, wird die Zinskomponente, die nicht Teil einer designierten Cashflow-Hedge-Beziehung ist und ergebniswirksam erfasst wird, nicht von Währungsschwankungen beeinflusst. Da aus keiner einzelnen Währung der Derivate in Cashflow-Hedge-Sicherungsbeziehungen eine signifikante Risikoposition resultiert, geben wir das Risiko aus all unseren wesentlichen Währungen (wie in Textziffer (26) beschrieben) als Summe an. Wenn der Euro zum 31. Dezember 2010 gegenüber allen unseren wesentlichen Währungen um 10 % an Wert gewonnen (verloren) hätte, wäre der in den anderen im Eigenkapital erfassten Wertänderungen enthaltene effektive Bestandteil von Cashflow-Hedges zur Absicherung von Fremdwährungspositionen um 46 Mio. € (31. Dezember 2009: 55 Mio. €; 31. Dezember 2008: 68 Mio. €) höher (niedriger) gewesen als ausgewiesen.

Änderungen des Wertes unserer eingebetteten Fremdwährungsderivate werden ergebniswirksam erfasst. Wenn der Euro zum 31. Dezember 2010 gegenüber dem Schweizer Franken (der Währung, die den größten Anteil an unserer Risikoposition aus eingebetteten Fremdwährungsderivaten hat) um 10 % an Wert gewonnen (verloren) hätte, wären die Effekte auf die sonstigen Erträge um 42 Mio. € (31. Dezember 2009: 38 Mio. €; 31. Dezember 2008: 40 Mio. €) höher (niedriger) gewesen als ausgewiesen.

Unsere Sensitivität gegenüber Wechselkursschwankungen hat im Geschäftsjahr 2010 abgenommen. Hauptgründe hierfür sind das geringere Nominalvolumen der zu sichernden Transaktionen.

### Management des Zinsrisikos

Das vorrangige Ziel beim Management des Zinsrisikos lautet, die Volatilität unseres Ergebnisses durch eine ausgewogene Struktur von fest- und variabel verzinslichen Cashflows zu reduzieren. Wir steuern daher das Zinsrisiko, indem wir unser Anlagen- und Fremdkapitalportfolio um zinsbezogene Derivate ergänzen.

Unsere Finanzschulden weisen überwiegend einen festen Zinssatz auf, ein Anteil von rund 1,6 Mrd. € ist jedoch variabel verzinst. Zur Absicherung des Cashflow-Risikos, das aus Schwankungen künftiger Zinszahlungen im Zusammenhang mit den variabel verzinslichen Tranchen des Schuldscheindarlehens (SSD) in Nennwerthöhe von 548 Mio. € erwächst, haben wir Payer-Zinsswaps abgeschlossen. Durch diese wird der zugrunde liegende Zinssatz wirtschaftlich betrachtet in einen festen Zinssatz umgewandelt, da die Änderungen der Zahlungsströme aus den Grundgeschäften infolge der Änderungen des EURIBOR durch die Änderungen der Zahlungsströme der Zinsswaps kompensiert werden. Zum 31. Dezember 2010 deckten die Zinsswaps die variabel verzinslichen Tranchen des SSD vollständig ab. Das Cashflow-Risiko aus Schwankungen der künftigen Zahlungen für den ausstehenden Saldo des Akquisitionsschuldens und des zusätzlichen Darlehens, der zum 31. Dezember 2010 1,1 Mrd. € betrug, wurde nicht abgesichert.

Unter Berücksichtigung der Zinsswaps wiesen rund 75 % (2009: 100 %) unserer zinstragenden Verbindlichkeiten zum 31. Dezember 2010 einen festen Zinssatz auf. Die verbleibende Zinsrisikoposition aus variabel verzinslichen, nicht abgesicherten Finanzverbindlichkeiten (hauptsächlich das Akquisitionsdarlehen) wird praktisch durch die Zinsrisikoposition aus variabel verzinslichen Zahlungsmitteläquivalenten zum 31. Dezember 2010 ausgeglichen, die hinsichtlich Verzinsung, Betrag und Restlaufzeit vergleichbar sind.

Abgesehen von der kompensierenden Wirkung ist die Höhe des verbleibenden Zinsrisikos aus diesen Positionen aufgrund der kurzen Laufzeiten unserer Finanzinvestitionen (siehe Textziffer (13)) und des Akquisitionsdarlehens (siehe Textziffer (18b)) unwesentlich.

### Derivative Finanzinstrumente mit designierter Sicherungsbeziehung – Cashflow-Hedges

Zum 31. Dezember 2010 hielten wir Zinsderivate mit designierter Sicherungsbeziehung mit einem negativen beizulegenden Zeitwert von 10 Mio. € (2009: 5 Mio. €). Die damit verbundenen Nettoverluste im Geschäftsjahr 2010 in Höhe von 10 Mio. € (2009: 14 Mio. €; 2008: 15 Mio. €) wurden infolge der Designation als Cashflow-Hedges in den anderen im Eigenkapital erfassten Wertänderungen erfasst. Aufgrund der Realisierung der Grundgeschäfte wurden 2010 Nettoverluste von 6 Mio. € (2009: 26 Mio. €; 2008: 0 Mio. €) aus den anderen im Eigenkapital erfassten Wertänderungen ausgebucht und erfolgswirksam erfasst. Für diese Sicherungsgeschäfte wurde in den Jahren 2010, 2009 und 2008 keine Ineffektivität festgestellt.

Die folgende Tabelle enthält die vertraglichen Fälligkeiten der Cashflows für die SSD-Zinszahlungen:

| Anfangsdatum  | Enddatum      | Nominalvolumen | Referenzzinssatz |
|---------------|---------------|----------------|------------------|
| 9. April 2009 | 9. April 2012 | 359,5 Mio. €   | 3-Monats-EURIBOR |
| 9. April 2009 | 9. April 2014 | 158 Mio. €     | 3-Monats-EURIBOR |
| 2. Juni 2009  | 2. Juni 2014  | 30 Mio. €      | 3-Monats-EURIBOR |

## Zinsrisikoposition

Die Sensitivitätsanalyse zur Darstellung unserer Zinsrisikoposition am Bilanzstichtag basiert auf den folgenden Annahmen:

- Änderungen der Zinssätze beeinflussen originäre festverzinsliche Finanzinstrumente nur dann, wenn sie zum beizulegenden Zeitwert bilanziert werden. Unsere originären finanziellen Verbindlichkeiten sind keinem Risiko einer Änderung des beizulegenden Zeitwertes ausgesetzt, weil wir sie zu fortgeführten Anschaffungskosten bilanzieren. Da wir am 31. Dezember 2010 keine originären festverzinslichen, als zur Veräußerung verfügbar klassifizierten finanziellen Vermögenswerte im Bestand hatten, ist eine eigenkapitalbezogene Sensitivitätsberechnung nicht erforderlich. Da wir 2010 keine festverzinslichen finanziellen Vermögenswerte gehalten haben, ist das Risiko am Stichtag repräsentativ für das Gesamtjahresrisiko.

- Erträge oder Aufwendungen aus originären Finanzinstrumenten mit variabler Verzinsung unterliegen dem Zinsrisiko, wenn sie keine Grundgeschäfte einer effektiven Sicherungsbeziehung darstellen. Da wir für die variabel verzinslichen Teile des SSD Payer-Zinsswaps abgeschlossen haben, sind wir keinem signifikanten Zinsrisiko aus unserem SSD ausgesetzt und berücksichtigen allein Zinsänderungen für unsere variabel verzinslichen Anlagen und das Akquisitionsdarlehen in der Sensitivitätsanalyse, die sich auf das Ergebnis bezieht. Hinsichtlich der investierten Volumina sind die Daten zum Jahresende nicht für das Gesamtjahr repräsentativ. Unser Cashflow-Zinsrisiko aus Anlagen im Jahr 2010 bezog sich auf Anlagen in Höhe von durchschnittlich 776 Mio. €, die von einem Höchstwert von 1,1 Mrd. € bis zu einem Tiefstwert von 371 Mio. € reichten. Unsere Cashflow-Zinsrisikoposition am Jahresende beträgt 874 Mio. €.

Hinsichtlich der finanzierten Volumina sind die Daten zum Jahresende nicht für das Gesamtjahr repräsentativ, da 2010 ein erheblicher Teil der Schulden aus dem Akquisitionsdarlehen refinanziert wurde, das im Zusammenhang mit dem Erwerb von Sybase aufgenommen worden war. Unser Cashflow-Zinsrisiko aus der Finanzierungstätigkeit im Jahr 2010 bezog sich auf verzinsliche Verbindlichkeiten in Höhe von durchschnittlich 711 Mio. €, die von einem Höchstwert von 2,74 Mrd. € bis zu einem Tiefstwert von 7 Mio. € reichten. Unsere Cashflow-Zinsrisikoposition am Jahresende beträgt 1,1 Mrd. €.

- Infolge der Designation von Payer-Zinsswaps als Teil eines Cashflow-Hedges wirken sich die entsprechenden Zinssatzänderungen auf die jeweiligen im Eigenkapital erfassten Beträge aus Cashflow-Hedges zur Absicherung von Zinsrisiken aus. Die Veränderungen aus der variablen Seite der Zinsderivate werden dabei nicht in die Berechnung der Zinssensitivitäten einbezogen, da diese die variablen Zinszahlungen für das SSD ausgleichen. Deshalb berücksichtigen wir für die in einer Sicherungsbeziehung eingebundenen Zinsswaps nur die Zinssensitivität aus der Diskontierung der Festzins-Cashflows aus dem Zinsswap in der eigenkapitalbezogenen Sensitivitätsberechnung. Hinsichtlich der Darlehens- und damit gesicherten Beträge sind die Daten zum Jahresende für das Gesamtjahr repräsentativ.

Während die Sensitivitätsanalyse im Jahr 2008 auf einer Parallelverschiebung der Zinsstrukturkurven um +100/100 Basispunkte beruhte, wurde aufgrund des gegenwärtigen niedrigen Zinsniveaus für die Sensitivitätsanalysen 2010 und 2009 die Verschiebung der Zinsstrukturkurven zur Vermeidung negativer Zinsen von –100 Basispunkten auf –20 Basispunkte reduziert. Wenn die Zinssätze zum 31. Dezember 2010 und 2009 um 100 Basispunkte höher (20 Basispunkte niedriger) (2008: 100 Basispunkte höher (niedriger)) gewesen wären, hätte dies keine wesentlichen Auswirkungen gehabt auf:

- die in den anderen im Eigenkapital erfassten Wertänderungen enthaltenen Gewinne/Verluste aus der Position zur Veräußerung verfügbare finanzielle Vermögenswerte
- das Finanzergebnis für unsere variabel verzinslichen Anlagen und finanziellen Verbindlichkeiten
- den in den anderen im Eigenkapital erfassten Wertänderungen enthaltenen effektiven Bestandteil von Cashflow-Hedges zur Absicherung von Zinsrisiken.

---

### **Management des Aktienkursrisikos**

Unsere Finanzinvestitionen in Eigenkapitalinstrumente mit auf einem aktiven Markt notierten Marktpreisen (2010: 28 Mio. €; 2009: 25 Mio. €) werden auf der Grundlage des aktuellen Marktwertes laufend beobachtet. Dieser schwankt aufgrund der Volatilität der weltweiten Aktienmärkte. Ein angenommener Anstieg (Rückgang) der Aktienkurse zum 31. Dezember 2010 um 20 % hätte keine wesentlichen Auswirkungen auf den Wert unserer Anlagen in marktgängigen Wertpapieren und die entsprechenden Beträge in den anderen im Eigenkapital erfassten Wertänderungen.

Wir sind einem Aktienkursrisiko bezüglich unserer anteilsbasierten Vergütungsprogramme ausgesetzt. Um die sich daraus ergebende Volatilität unseres Ergebnisses zu reduzieren, sichern wir Zahlungsstromrisiken aus diesen Programmen durch den Kauf derivativer Instrumente, ohne jedoch eine designierte Sicherungsbeziehung einzugehen. Die Derivate zur Absicherung der anteilsbasierten Vergütungsprogramme fallen in den Anwendungsbereich des IFRS 7. Bei den zugrunde liegenden Programmen ist dies jedoch nicht der Fall, sodass das mit ihnen verbundene Aktienkursrisiko nicht analysiert zu werden braucht. In unsere Sensitivitätsanalyse fließen jedoch sowohl die zugrunde liegenden anteilsbasierten Vergütungsprogramme als auch die Sicherungsinstrumente ein. Folglich basiert die Berechnung auf unserer Nettoposition des Aktienkursrisikos, da wir der Ansicht sind, dass das Aktienkursrisiko bei alleiniger Berücksichtigung der Derivate nicht richtig abgebildet würde. Ein angenommener Anstieg (Rückgang) der Aktienkurse zum 31. Dezember 2010 um 20 % hätte eine Zunahme (Abnahme) unserer Aufwendungen für anteilsbasierte Vergütungsprogramme um 53 Mio. € (2009: 46 Mio. €; 2008: 41 Mio. €) zur Folge.

### **Management des Kreditrisikos**

Zur Reduzierung des Kreditrisikos, das sich aus unserer Investitionstätigkeit und den derivativen finanziellen Vermögenswerten ergibt, haben wir in Übereinstimmung mit unserer internen Treasury-Richtlinie alle Geschäfte nur mit anerkannten, großen Finanzinstituten und Emittenten mit jeweils hohen externen Kreditratings abgeschlossen. Gemäß dieser Richtlinie

investieren wir nur in Finanzanlagen von Emittenten mit einem Mindestrating von „A–“. Das gewichtete durchschnittliche Rating unserer Finanzanlagen liegt zwischen „AA–“ und „A+“. Wir verfolgen eine vorsichtige Anlagepolitik, die durch Anlagen mit überwiegend kurzfristiger Laufzeit und Standardanlageinstrumente sowie eine breite Streuung der Anlagen auf unterschiedliche Kontrahenten gekennzeichnet ist. Darüber hinaus ergibt sich eine Konzentration von Kreditrisiken, wenn Vertragspartner gleichartige Aktivitäten in demselben Finanzinstrument, Sektor oder derselben geografischen Region ausführen. Dies vermeiden wir durch die Streuung unserer Vertragspartner über verschiedene Länder weltweit und durch ein internes Limitsystem, wonach das Geschäftsvolumen mit jeder einzelnen Vertragspartei auf ein definiertes Limit begrenzt ist. Dieses Limit hängt von dem niedrigsten offiziellen langfristigen Kreditrating mindestens einer großen Ratingagentur oder von der Teilnahme an Einlagensicherungsfonds ab. Die strikte Einhaltung dieser Kontrahentenlimits wird laufend überwacht. Da die Prämien für Credit Default Swaps hauptsächlich von der Einschätzung der Bonität des jeweiligen Schuldners durch die Marktteilnehmer abhängen, überwachen wir zusätzlich deren Entwicklung, um auf diese Weise sich ändernde Risikostrukturen bei unseren Vertragspartnern zu erkennen und so zeitnah auf etwaige Veränderungen reagieren zu können.

Das zum Teil von Kreditversicherungen abgedeckte Ausfallrisiko von Forderungen aus Lieferungen und Leistungen wird getrennt überwacht, wobei wir uns vornehmlich auf die Beurteilung der Kundenbonität mithilfe von externen Ratings sowie von Erfahrungswerten mit den entsprechenden Kunden stützen. Außenstände werden laufend überwacht. Kreditrisiken tragen wir durch Einzelwert- und Portfoliowertberichtigungen Rechnung (siehe Textziffer (3)). Der Einfluss einzelner Kunden ist gering, da unser Kundenstamm groß ist und sich auf zahlreiche Branchen und Länder auf der ganzen Welt erstreckt. Weitere Informationen über unsere Forderungen aus Lieferungen und Leistungen sind Textziffer (14) zu entnehmen. Über unser maximales Kreditrisiko gibt Textziffer (25) Aufschluss.

---

### **Management des Liquiditätsrisikos**

Unsere Liquidität wird von Global Treasury gesteuert. Das wichtigste Ziel dabei lautet, eine Mindestliquidität sicherzustellen, um jederzeit Zahlungsfähigkeit zu gewährleisten.

Unsere Hauptliquiditätsquelle ist unsere laufende Geschäftstätigkeit, durch die wir in der Vergangenheit primär die für unsere Investitions- und Finanzierungsstrategie erforderlichen liquiden Mittel erwirtschaftet haben. Für die Mehrheit der Tochterunternehmen werden alle Liquiditätsüberschüsse bei Global Treasury zusammengeführt (Cash Pooling). Global Treasury verteilt die liquiden Mittel dann gemäß dem Finanzierungsbedarf anderer Tochterunternehmen oder investiert etwaige Nettoüberschüsse zwecks Renditeoptimierung am Markt. Die Anlagen beschränken sich zur Sicherstellung der Liquidität auf Kontrahenten oder Emittenten mit hoher Bonität, wie vorstehend ausgeführt. Ein hohes Niveau an flüssigen Mitteln und marktgängigen Wertpapieren bildet daher eine strategische Reserve, die dazu beiträgt, SAP flexibel und unabhängig zu halten.

Neben dem Management des Kapitaleinsatzes und der liquiden Mittel hat SAP das Liquiditätsrisiko, das aus unserer normalen Geschäftstätigkeit und der Erfüllung unserer finanziellen Verpflichtungen erwächst, durch die angemessene Einrichtung von Kreditlinien bei verschiedenen Finanzinstituten verringert, die wir bei Bedarf in Anspruch nehmen können.

Um unsere hohe finanzielle Flexibilität zu erhalten, schloss die SAP AG am 15. Dezember 2010 eine syndizierte revolvingende Kreditlinie über 1,5 Mrd. € mit einer anfänglichen Laufzeit von fünf Jahren ab, die im Dezember 2015 ausläuft. Diese Kreditlinie ersetzt die im September 2009 geschlossene Vereinbarung über eine syndizierte revolvingende Kreditlinie über 1,5 Mrd. €. Die Nutzung der Kreditlinie ist nicht an finanzielle Auflagen gebunden. Die Zinssätze belaufen sich auf EURIBOR oder LIBOR für die jeweilige Währung zuzüglich einer Marge von 45 bis 75 Basispunkten pro Jahr in Abhängigkeit von dem in Anspruch genommenen Betrag. Die Bereitstellungsgebühr beträgt 15,75 Basispunkte pro Jahr auf den nicht in Anspruch genommenen Betrag. Eine Inanspruchnahme lag zum 31. Dezember 2010 nicht vor.

Zusätzlich verfügt die SAP AG zum 31. Dezember 2010 über Kreditlinien in Höhe von insgesamt 545 Mio. € (2009: 545 Mio. €). Eine Inanspruchnahme lag zum 31. Dezember 2010 und 2009 nicht vor. Per 31. Dezember 2010 verfügen einige Tochterunternehmen über Kreditlinien, die es ihnen ermöglichen, bis zu einem Betrag von 60 Mio. € kurzfristige Kredite in lokaler Währung zum aktuellen Marktzinssatz aufzunehmen (2009: 51 Mio. €). Zum 31. Dezember 2010 wurden diese Kreditlinien von den Tochterunternehmen zu 1 Mio. € (2009: 6 Mio. €) in Anspruch genommen.

### **(27) Angaben zum beizulegenden Zeitwert von Finanzinstrumenten**

#### **Beizulegender Zeitwert von Finanzinstrumenten**

Wir nutzen in unserem normalen Geschäftsverlauf verschiedene Finanzinstrumente. Dabei verwenden wir folgende Kategorien: Kredite und Forderungen (Loans and Receivables, L&R), zur Veräußerung verfügbar (Available for Sale, AFS), zu Handelszwecken gehalten (Held for Trading, HFT) und zu fortgeführten Anschaffungskosten (Amortized Cost, AC).

Die Buchwerte und beizulegenden Zeitwerte unserer Finanzinstrumente stellten sich am 31. Dezember wie folgt dar:

## Beizulegender Zeitwert von Finanzinstrumenten

| Mio. €                                                               |         | 2010                     |                                                       |                                    |                                       |                                          |                                                       |
|----------------------------------------------------------------------|---------|--------------------------|-------------------------------------------------------|------------------------------------|---------------------------------------|------------------------------------------|-------------------------------------------------------|
|                                                                      |         | Buch-<br>werte<br>31.12. | Bewertungskategorien                                  |                                    |                                       | Beizu-<br>legender<br>Zeitwert<br>31.12. | Nicht im<br>Anwen-<br>dungsbe-<br>reich von<br>IFRS 7 |
| Kategorie                                                            |         |                          | Zu fort-<br>geführten<br>Anschaf-<br>fungs-<br>kosten | Zu<br>Anschaf-<br>fungs-<br>kosten | Zum<br>beizu-<br>legenden<br>Zeitwert |                                          |                                                       |
| <b>Vermögenswerte</b>                                                |         |                          |                                                       |                                    |                                       |                                          |                                                       |
| Zahlungsmittel und Zahlungsmitteläquivalente                         | L&R     | 3.518                    | 3.518                                                 |                                    |                                       | 3.518                                    |                                                       |
| Forderungen aus Lieferungen und Leistungen                           | L&R     | 3.177                    | 3.031                                                 |                                    |                                       | 3.031                                    | 146                                                   |
| Sonstige finanzielle Vermögenswerte                                  |         | 633                      |                                                       |                                    |                                       |                                          |                                                       |
| Schuldtitel                                                          | L&R/AFS |                          |                                                       |                                    | 0                                     | 0                                        |                                                       |
| Eigenkapitaltitel                                                    | AFS/–   |                          |                                                       | 79                                 | 28                                    | 28                                       | 40                                                    |
| Sonstige nicht derivative finanzielle Vermögenswerte                 |         |                          | 188                                                   |                                    |                                       | 188                                      | 182                                                   |
| Derivative Finanzinstrumente                                         |         |                          |                                                       |                                    |                                       |                                          |                                                       |
| mit designierter Sicherungsbeziehung                                 | –       |                          |                                                       |                                    | 3                                     | 3                                        |                                                       |
| ohne designierte Sicherungsbeziehung                                 | HFT     |                          |                                                       |                                    | 113                                   | 113                                      |                                                       |
| <b>Verbindlichkeiten</b>                                             |         |                          |                                                       |                                    |                                       |                                          |                                                       |
| Verbindlichkeiten aus Lieferungen und Leistungen                     | AC      | –952                     | –699                                                  |                                    |                                       | –699                                     | –253                                                  |
| Finanzielle Verbindlichkeiten                                        |         | –4.591                   |                                                       |                                    |                                       |                                          |                                                       |
| Nichtderivative finanzielle Verbindlichkeiten                        |         |                          | –4.445                                                |                                    |                                       | –4.463                                   |                                                       |
| Derivative Finanzinstrumente                                         |         |                          |                                                       |                                    |                                       |                                          |                                                       |
| mit designierter Sicherungsbeziehung                                 | –       |                          |                                                       |                                    | –37                                   | –37                                      |                                                       |
| ohne designierte Sicherungsbeziehung                                 | HFT     |                          |                                                       |                                    | –109                                  | –109                                     |                                                       |
| <b>Klassifizierung nach IAS 39</b>                                   |         |                          |                                                       |                                    |                                       |                                          |                                                       |
| Finanzielle Vermögenswerte                                           |         |                          |                                                       |                                    |                                       |                                          |                                                       |
| erfolgswirksam zum beizulegenden Zeitwert zu Handelszwecken gehalten | HFT     | 113                      |                                                       |                                    | 113                                   | 113                                      |                                                       |
| zur Veräußerung verfügbar                                            | AFS     | 107                      |                                                       | 79                                 | 28                                    | 28                                       |                                                       |
| Kredite und Forderungen                                              | L&R     | 6.883                    | 6.737                                                 |                                    |                                       | 6.737                                    | 146                                                   |
| Finanzielle Verbindlichkeiten                                        |         |                          |                                                       |                                    |                                       |                                          |                                                       |
| erfolgswirksam zum beizulegenden Zeitwert zu Handelszwecken gehalten | HFT     | –109                     |                                                       |                                    | –109                                  | –109                                     |                                                       |
| zu fortgeführten Anschaffungskosten                                  | AC      | –5.397                   | –5.144                                                |                                    |                                       | –5.162                                   | –253                                                  |
|                                                                      |         |                          |                                                       |                                    |                                       |                                          |                                                       |
| Nicht im Anwendungsbereich von IAS 39                                |         |                          |                                                       |                                    |                                       |                                          |                                                       |
| Finanzinstrumente im Zusammenhang mit Leistungen an Arbeitnehmer     |         | 182                      |                                                       |                                    |                                       |                                          | 182                                                   |
| Assoziierte Unternehmen                                              |         | 40                       |                                                       |                                    |                                       |                                          | 40                                                    |
| Derivative Finanzinstrumente mit designierter Sicherungsbeziehung    |         | –34                      |                                                       |                                    | –34                                   | –34                                      |                                                       |

| 2009                     |                                                       |                                    |                                       |                                                       |
|--------------------------|-------------------------------------------------------|------------------------------------|---------------------------------------|-------------------------------------------------------|
| Buch-<br>werte<br>31.12. | Bewertungskategorien                                  |                                    |                                       | Beizu-<br>legender<br>Zeitwert<br>31.12.              |
|                          | Zu fort-<br>geführten<br>Anschaf-<br>fungs-<br>kosten | Zu<br>Anschaf-<br>fungs-<br>kosten | Zum<br>beizu-<br>legenden<br>Zeitwert | Nicht im<br>Anwen-<br>dungsbe-<br>reich von<br>IFRS 7 |
| 1.884                    | 1.884                                                 |                                    |                                       | 1.884                                                 |
| 2.598                    | 2.508                                                 |                                    |                                       | 2.508                                                 |
| 770                      |                                                       |                                    |                                       | 90                                                    |
|                          |                                                       |                                    | 0                                     | 0                                                     |
|                          |                                                       | 62                                 | 25                                    | 25                                                    |
|                          | 499                                                   |                                    |                                       | 27                                                    |
|                          |                                                       |                                    |                                       | 91                                                    |
|                          |                                                       |                                    | 3                                     | 3                                                     |
|                          |                                                       |                                    | 63                                    | 63                                                    |
| -673                     | -479                                                  |                                    |                                       | -479                                                  |
| -875                     |                                                       |                                    |                                       | -194                                                  |
|                          | -749                                                  |                                    |                                       | -751                                                  |
|                          |                                                       |                                    | -17                                   | -17                                                   |
|                          |                                                       |                                    | -109                                  | -109                                                  |
| 63                       |                                                       |                                    | 63                                    | 63                                                    |
| 87                       |                                                       | 62                                 | 25                                    | 25                                                    |
| 4.981                    | 4.891                                                 |                                    |                                       | 4.891                                                 |
|                          |                                                       |                                    |                                       | 90                                                    |
| -109                     |                                                       |                                    | -109                                  | -109                                                  |
| -1.422                   | -1.228                                                |                                    |                                       | -1.230                                                |
|                          |                                                       |                                    |                                       | -194                                                  |
| 91                       |                                                       |                                    |                                       | 91                                                    |
| 27                       |                                                       |                                    |                                       | 27                                                    |
| -14                      |                                                       |                                    | -14                                   | -14                                                   |

### Bestimmung der beizulegenden Zeitwerte

In IAS 39 ist der beizulegende Zeitwert definiert als der Betrag, zu dem zwischen sachverständigen, vertragswilligen und voneinander unabhängigen Geschäftspartnern unter marktüblichen Bedingungen ein Vermögenswert getauscht oder eine Schuld beglichen werden könnte. Dementsprechend liefern notierte Preise an einem aktiven Markt den besten Anhaltspunkt für den beizulegenden Zeitwert. Wenn Marktpreise nicht unmittelbar zur Verfügung stehen, ist der beizulegende Zeitwert unter Einsatz von Bewertungstechniken zu ermitteln. Wir haben unsere Finanzinstrumente in solche unterteilt, die zum beizulegenden Zeitwert bewertet werden, und solche, die zu Anschaffungskosten oder fortgeführten Anschaffungskosten bilanziert werden.

### Zum beizulegenden Zeitwert bewertete Finanzinstrumente

Entsprechend den Vorgaben von IFRS 7 haben wir unsere zum beizulegenden Zeitwert bewerteten Finanzinstrumente nach der Priorität der Parameter, die zur Bewertung herangezogen werden (Inputs), kategorisiert und in eine dreistufige Fair-Value-Hierarchie eingeordnet.

Höchste Priorität in der Fair-Value-Hierarchie besitzen notierte Marktpreise in aktiven Märkten für identische Vermögenswerte oder Verbindlichkeiten (Stufe 1); auf der untersten Stufe dieser Hierarchie stehen unbeobachtbare Daten (Stufe 3). Die Parameter zur Bemessung des beizulegenden Zeitwertes eines einzelnen Instruments können in drei verschiedene Stufen der Fair-Value-Hierarchie eingeteilt werden. Dabei wird die Hierarchiestufe, in welche die Zeitwertbewertung in ihrer Gesamtheit fällt, nach der niedrigsten Bewertung bestimmt, die maßgeblich für die Zeitwertbewertung in ihrer Gesamtheit ist. Die Einschätzung, inwieweit ein bestimmter Parameter für die Zeitwertbewertung in ihrer Gesamtheit maßgeblich ist, erfordert eine Beurteilung unsererseits. Auch Faktoren, die spezifisch für den betreffenden Vermögenswert oder die betreffende Verbindlichkeit sind, fließen in die Bewertung ein.

Die Stufen der Fair-Value-Hierarchie und ihre Anwendung auf unsere finanziellen Vermögenswerte und Verbindlichkeiten sowie die jeweilige Bestimmung des beizulegenden Zeitwertes sind im Folgenden beschrieben:

– Stufe 1: Notierte Marktpreise für identische Vermögenswerte oder Verbindlichkeiten auf aktiven Märkten

- Zur Veräußerung verfügbare Schuldtitel und Beteiligungen: Die beizulegenden Zeitwerte marktfähiger Wertpapiere basieren auf den Marktpreisen zum 31. Dezember.

– Stufe 2: Andere als direkt oder indirekt beobachtbare Parameter, wie notierte Marktpreise für vergleichbare Vermögenswerte/Verbindlichkeiten auf aktiven Märkten; notierte Marktpreise für identische oder vergleichbare Vermögenswerte/Verbindlichkeiten in nicht-aktiven Märkten; andere Parameter, die über den wesentlichen Teil der Laufzeit der Vermögenswerte/Verbindlichkeiten beobachtbar sind oder durch beobachtbare Marktdaten unterlegt werden können

- Derivative Finanzinstrumente: Der beizulegende Zeitwert von Devisentermingeschäften wird durch Abzinsung der erwarteten künftigen Cashflows über die jeweiligen Restlaufzeiten der Verträge über die jeweiligen Deposit-Zinssätze und Kassakurse ermittelt. Der beizulegende Zeitwert der Derivate zur Absicherung unserer anteilsbasierten Vergütungsprogramme wird unter Berücksichtigung von risikolosen Zinssätzen, der Restlaufzeit der Derivate, der Dividendenrenditen und des Aktienkurses sowie der Volatilität der SAP-Aktie berechnet. Der beizulegende Zeitwert

unserer derivativen Zinskontrakte errechnet sich durch Abzinsung der erwarteten künftigen Cashflows auf Basis der geltenden Marktzinsen und Futures für die Restlaufzeit des Vertrags.

- Zur Veräußerung verfügbare Beteiligungen an notierten Unternehmen: Bestimmte von uns gehaltene Beteiligungen unterliegen einer Verkaufsrestriktion. Aus diesem Grund bestimmen wir die beizulegenden Zeitwerte auf Basis der Marktpreise zum 31. Dezember unter Berücksichtigung eines Abschlags für die Verkaufsbeschränkung, der auf der Prämie für eine entsprechende Put-Option beruht.

– Stufe 3: Nicht beobachtbare Parameter, da zum Bewertungszeitpunkt keine oder keine verwertbare Marktaktivität für den zu bewertenden Vermögenswert/die zu bewertende Verbindlichkeit vorhanden ist, die für die Bewertung wesentlich sind

Die folgende Tabelle zeigt eine Zuordnung unserer finanziellen Vermögenswerte und Verbindlichkeiten zu den drei Stufen der Fair-Value-Hierarchie gemäß IFRS 7. Diese werden nach IAS 39 entweder erfolgswirksam oder über andere im Eigenkapital erfasste Wertänderungen zum beizulegenden Zeitwert bewertet.

## Klassifizierung der Finanzinstrumente

| Mio. €                                                | 2010     |            |          |            | 2009     |            |          |            |
|-------------------------------------------------------|----------|------------|----------|------------|----------|------------|----------|------------|
|                                                       | Stufe 1  | Stufe 2    | Stufe 3  | Gesamt     | Stufe 1  | Stufe 2    | Stufe 3  | Gesamt     |
| <b>Finanzielle Vermögenswerte</b>                     |          |            |          |            |          |            |          |            |
| Schuldtitel                                           | 0        | 0          | 0        | 0          | 0        | 0          | 0        | 0          |
| Beteiligungen                                         | 1        | 27         | 0        | 28         | 1        | 24         | 0        | 25         |
| Zur Veräußerung verfügbare finanzielle Vermögenswerte | 1        | 27         | 0        | 28         | 1        | 24         | 0        | 25         |
| Derivative finanzielle Vermögenswerte                 | 0        | 116        | 0        | 116        | 0        | 66         | 0        | 66         |
| <b>Gesamt</b>                                         | <b>1</b> | <b>143</b> | <b>0</b> | <b>144</b> | <b>1</b> | <b>90</b>  | <b>0</b> | <b>91</b>  |
| <b>Finanzielle Verbindlichkeiten</b>                  |          |            |          |            |          |            |          |            |
| Derivative finanzielle Verbindlichkeiten              | 0        | 146        | 0        | 146        | 0        | 126        | 0        | 126        |
| <b>Gesamt</b>                                         | <b>0</b> | <b>146</b> | <b>0</b> | <b>146</b> | <b>0</b> | <b>126</b> | <b>0</b> | <b>126</b> |



---

### **Zu Anschaffungskosten/fortgeführten Anschaffungskosten bewertete Finanzinstrumente**

Die beizulegenden Zeitwerte dieser Instrumente werden wie folgt ermittelt:

- Zahlungsmittel und Zahlungsmitteläquivalente, Forderungen aus Lieferungen und Leistungen, andere nicht derivative finanzielle Vermögenswerte: Da die finanziellen Vermögenswerte hauptsächlich kurzfristigen Charakter haben, wird angenommen, dass die beizulegenden Zeitwerte näherungsweise ihren Buchwerten entsprechen. Unverzinsliche oder niedrig verzinsliche langfristige Ausleihungen an Dritte oder Mitarbeiter zinsen wir auf den Barwert der erwarteten künftigen Cashflows ab und wenden dafür den ursprünglichen Effektivzinssatz an, den ein Darlehensnehmer bei einem Finanzinstitut für ein ähnliches Darlehen zahlen müsste.
- Zur Veräußerung verfügbare Beteiligungen an nicht börsennotierten Unternehmen: Bei diesen Beteiligungen, die hauptsächlich aus Beteiligungen an Venture-Capital-Gesellschaften bestehen, stehen wegen des fehlenden aktiven Marktes mit Marktpreisen keine beizulegenden Zeitwerte unmittelbar zur Verfügung. Auch ist die Berechnung von beizulegenden Zeitwerten durch die Abzinsung von erwarteten künftigen Cashflows nicht möglich, da die Zahlungsströme nicht verlässlich bestimmt werden können. Solche Beteiligungen werden daher zu Anschaffungskosten bewertet. Unsere Schätzungen ihres beizulegenden Zeitwertes beinhalten einen Vergleich mit ähnlichen Gesellschaften. Dabei ziehen wir Umsatzmultiplikatoren in Betracht und berücksichtigen die Liquiditätssituation, den Finanzierungsbedarf, die Gewinn- und Umsatzvorschau, die betriebliche Leistung, personelle Veränderungen beim Management und bei den Anteilseignern sowie die Wettbewerbssituation.
- Verbindlichkeiten aus Lieferungen und Leistungen und nicht derivative Verbindlichkeiten: Unsere nicht derivativen finanziellen Verbindlichkeiten umfassen Finanzschulden und andere nicht derivative finanzielle Verbindlichkeiten. Da die Verbindlichkeiten aus Lieferungen und Leistungen und sonstigen nicht

derivativen finanziellen Verbindlichkeiten vor allem kurzfristigen Charakter haben, gehen wir davon aus, dass die beizulegenden Zeitwerte näherungsweise ihren Buchwerten entsprechen. Die Buchwerte unserer variabel verzinslichen Finanzschulden gegenüber Kreditinstituten entsprechen im Allgemeinen den jeweiligen beizulegenden Zeitwerten. Den beizulegenden Zeitwert von fest verzinslichen Finanzschulden ermitteln wir auf Basis verfügbarer Marktpreise oder durch Abzinsung der Cashflows mit den am 31. Dezember geltenden Marktzinssätzen.

### **(28) Anteilsbasierte Vergütungsprogramme**

Wir unterhalten verschiedene anteilsbasierte Vergütungsprogramme für Mitarbeiter und Führungskräfte, die durch Barausgleich und durch Eigenkapitalinstrumente abgegolten werden. Alle diese Programme sind im Folgenden beschrieben.

#### **a) Anteilsbasierte Vergütungsprogramme mit Barausgleich**

Bei den von uns gewährten Wertsteigerungsrechten (Stock Appreciation Rights) handelt es sich um anteilsbasierte Vergütungsprogramme mit Barausgleich. Sie umfassen die folgenden Programme, die nachfolgend näher erläutert werden: STAR-Programm (Stock Appreciation Rights), STAR PP (STAR Performance Plan 2009), Incentive 2010, SOP-Programm (Virtual Stock Option Plan), SOP PP (SOP Performance Plan 2009), SOP 2010 (Virtual Stock Option Plan 2010), BO-Rechte (in der Vergangenheit von Business Objects gewährte Rechte, die beim Erwerb von Business Objects im Jahr 2008 übernommen wurden) und Sybase-Rechte (in der Vergangenheit von Sybase gewährte Rechte, die beim Erwerb von Sybase im Jahr 2010 übernommen wurden).

Bei der Berechnung des beizulegenden Zeitwertes am Tag der Gewährung wurden die folgenden Parameter und Annahmen zugrunde gelegt:

## Zeitwerte und Annahmen am Tag der Gewährung

|                                                            | 2010     |                             | 2009     |          |         |                | 2008    |                         |
|------------------------------------------------------------|----------|-----------------------------|----------|----------|---------|----------------|---------|-------------------------|
|                                                            | SOP 2010 | Sybase-Rechte <sup>1)</sup> | STAR PP  | SOP PP   | STAR    | Incentive 2010 | SOP     | BO-Rechte <sup>1)</sup> |
| Gewichteter Mittelwert (Fair Value)                        | 6,46 €   | 50,07 €                     | 3,53 €   | 5,62 €   | 3,26 €  | 4,93 €         | 7,11 €  | 20,98 €                 |
| Erwartete Laufzeit (in Jahren)                             | 5,8      | 1,5                         | 2,3      | 4,6      | 2,5     | 2,9            | 4,8     | 3,3                     |
| Risikofreier Anlagezinssatz (je nach Laufzeit)             | 1,63 %   | N/A                         | 1,55 %   | 2,39 %   | 3,21 %  | 3,54 %         | 3,43 %  | 3,42 % bis 3,74 %       |
| Zuteilungskurs der SAP-Aktie                               | 35,48 €  | N/A                         | 28,00 €  | 28,00 €  | 32,69 € | 36,15 €        | 32,69 € | N/A                     |
| Kurs der SAP-Aktie                                         | 35,45 €  | N/A                         | 28,23 €  | 28,23 €  | 31,61 € | 31,45 €        | 31,61 € | 32,28 €                 |
| Erwartete Volatilität der SAP-Aktie                        | 26,9 %   | N/A                         | 39,9 %   | 35,0 %   | 31,8 %  | 29,6 %         | 30,0 %  | 29,0 %                  |
| Erwartete Dividendenrendite der SAP-Aktie                  | 1,65 %   | N/A                         | 1,76 %   | 1,76 %   | 1,74 %  | 1,56 %         | 1,74 %  | 1,30 %                  |
| Zuteilungskurs des Referenzindex                           | N/A      | N/A                         | 97,54 €  | 97,54 €  | N/A     | 165,59 €       | N/A     | N/A                     |
| Kurs des Referenzindex                                     | N/A      | N/A                         | 108,82 € | 108,82 € | N/A     | 191,12 €       | N/A     | N/A                     |
| Erwartete Volatilität des Referenzindex                    | N/A      | N/A                         | 35,8 %   | 25,2 %   | N/A     | 15,9 %         | N/A     | N/A                     |
| Erwartete Dividendenrendite des Referenzindex              | N/A      | N/A                         | 1,10 %   | 1,06 %   | N/A     | N/A            | N/A     | N/A                     |
| Erwartete Korrelation zwischen SAP-Aktie und Referenzindex | N/A      | N/A                         | 38,1 %   | 36,5 %   | N/A     | 33,0 %         | N/A     | N/A                     |

<sup>1)</sup> Zeitwert zum Erwerbtag

Die Bewertung unserer ausstehenden Programme mit Barausgleich zum 31. Dezember 2010 basierte auf den folgenden Parametern und Annahmen:

## Zeitwerte und Annahmen am 31. Dezember 2010

|                                                                      | STAR               | STAR PP     | SOP                  | SOP PP      | SOP 2010             | BO-Rechte          | Sybase-Rechte |
|----------------------------------------------------------------------|--------------------|-------------|----------------------|-------------|----------------------|--------------------|---------------|
| Optionspreismodell                                                   | Monte-Carlo        | Monte-Carlo | Binomial             | Monte-Carlo | Monte-Carlo          | Binomial           | Kein          |
| Spanne der Gewährungszeitpunkte                                      | 03/2007<br>04/2008 | 05/2009     | 03/2007<br>04/2008   | 05/2009     | 09/2010              | 02/1998<br>01/2008 | 07/2010       |
| Ausgegebene Bezugsrechte (Tsd.)                                      | 37.202             | 16.029      | 15.664               | 10.321      | 5.397                | 5.162              | 745           |
| Gewichteter durchschnittlicher beizulegender Zeitwert zum 31.12.2010 | 0,13 €             | 0,01 €      | 4,58 €               | 4,60 €      | 7,74 €               | 14,79 €            | 48,65 €       |
| Gewichteter durchschnittlicher innerer Wert zum 31.12.2010           | 0,13 €             | 0,00 €      | 1,19 €               | 0,00 €      | 0,00 €               | 14,14 €            | 48,65 €       |
| Erwartete Laufzeit zum 31.12.2010 (in Jahren)                        | 0,1                | 0,7         | 1,7                  | 3,1         | 5,5                  | 2,4                | 1,1           |
| Risikofreier Anlagezinssatz                                          | N/A                | 0,56 %      | 0,56 % bis<br>0,87 % | 1,24 %      | 1,97 % bis<br>2,56 % | 0,75 %             | N/A           |
| Erwartete Volatilität der SAP-Aktie                                  | N/A                | 24,4 %      | 22,7 % bis<br>26,4 % | 26,8 %      | 26,3 % bis<br>26,7 % | 34,0 %             | N/A           |
| Erwartete Dividendenrendite der SAP-Aktie                            | N/A                | 1,79 %      | 1,79 %               | 1,79 %      | 1,79 %               | 1,75 %             | N/A           |
| Kurs des Referenzindex                                               | N/A                | 165,74      | N/A                  | 165,74      | N/A                  | N/A                | N/A           |
| Erwartete Volatilität des Referenzindex                              | N/A                | 11,9 %      | N/A                  | 29,4 %      | N/A                  | N/A                | N/A           |
| Erwartete Dividendenrendite des Referenzindex                        | N/A                | 1,11 %      | N/A                  | 1,15 %      | N/A                  | N/A                | N/A           |
| Erwartete Korrelation zwischen SAP-Aktie und Referenzindex           | N/A                | 7,9 %       | N/A                  | 37,4 %      | N/A                  | N/A                | N/A           |

Die erwartete Volatilität des SAP-Aktienkurses basiert auf der impliziten Volatilität gehandelter Optionen mit der entsprechenden Laufzeit und dem gleichen Ausübungspreis sowie der historischen Volatilität auf Basis der gleichen erwarteten Laufzeit wie die gewährten Optionen. Bei der Bewertung der Programme STAR PP und SOP PP beruht die erwartete Volatilität des Tech Peer Group Index (ISIN DE000A0YKR94) (TechPGI) auf der historischen Volatilität, die sich aus der Indexkursentwicklung ableitet.

Die erwartete Laufzeit der Optionen spiegelt sowohl die vertragliche Laufzeit als auch das erwartete beziehungsweise vergangene Ausübungsverhalten wider. Der risikolose Zinssatz orientiert sich an Bundesanleihen mit einer vergleichbaren Laufzeit. Die Dividendenrendite basiert auf den erwarteten künftigen Dividenden.

Die Entwicklung unserer Pläne mit Barausgleich stellte sich in den Geschäftsjahren zum 31. Dezember 2010, 2009 und 2008 wie folgt dar:

## Veränderungen der ausstehenden Bezugsrechte

| Tsd.                                                                              | STAR          | STAR PP       | Incentive<br>2010 | SOP           | SOP PP        | SOP 2010     | BO-Rechte    | Sybase-<br>Rechte |
|-----------------------------------------------------------------------------------|---------------|---------------|-------------------|---------------|---------------|--------------|--------------|-------------------|
| <b>Bestand per 31.12.2007</b>                                                     | <b>24.879</b> | <b>N/A</b>    | <b>1.157</b>      | <b>6.698</b>  | <b>N/A</b>    | <b>N/A</b>   | <b>N/A</b>   | <b>N/A</b>        |
| Gewährt 2008                                                                      | 18.517        | N/A           | 134               | 8.650         | N/A           | N/A          | 5.162        | N/A               |
| Ausgeübt/ausbezahlt 2008                                                          | -4.037        | N/A           | 0                 | 0             | N/A           | N/A          | -1.720       | N/A               |
| Verfallen 2008                                                                    | 0             | N/A           | 0                 | 0             | N/A           | N/A          | 0            | N/A               |
| Verwirkt 2008                                                                     | -2.125        | N/A           | -124              | -862          | N/A           | N/A          | -479         | N/A               |
| <b>Bestand per 31.12.2008</b>                                                     | <b>37.234</b> | <b>N/A</b>    | <b>1.167</b>      | <b>14.486</b> | <b>N/A</b>    | <b>N/A</b>   | <b>2.963</b> | <b>N/A</b>        |
| Gewährt 2009                                                                      | 0             | 16.029        | 0                 | 0             | 10.321        | N/A          | 0            | N/A               |
| Ausgeübt/ausbezahlt 2009                                                          | -2.943        | 0             | 0                 | 0             | 0             | N/A          | -704         | N/A               |
| Verfallen 2009                                                                    | 0             | 0             | 0                 | 0             | 0             | N/A          | 0            | N/A               |
| Verwirkt 2009                                                                     | -2.620        | -518          | -66               | -998          | -243          | N/A          | -372         | N/A               |
| <b>Bestand per 31.12.2009</b>                                                     | <b>31.671</b> | <b>15.511</b> | <b>1.101</b>      | <b>13.488</b> | <b>10.078</b> | <b>N/A</b>   | <b>1.887</b> | <b>N/A</b>        |
| Gewährt 2010                                                                      | 0             | 0             | 0                 | 0             | 0             | 5.397        |              | 745               |
| Ausgeübt/ausbezahlt 2010                                                          | -15.943       | 0             | 0                 | -167          | 0             | 0            | -571         | -9                |
| Verfallen 2010                                                                    | 0             | 0             | -1.101            | 0             | 0             | 0            |              |                   |
| Verwirkt 2010                                                                     | -648          | -747          | 0                 | -323          | -503          | -24          | -216         | -13               |
| <b>Bestand per 31.12.2010</b>                                                     | <b>15.080</b> | <b>14.764</b> | <b>0</b>          | <b>12.998</b> | <b>9.575</b>  | <b>5.373</b> | <b>1.100</b> | <b>723</b>        |
| <b>Zusätzliche Informationen</b>                                                  |               |               |                   |               |               |              |              |                   |
| Ausübbarer Bezugsrechte zum 31.12.2008                                            | N/A           | N/A           | 0                 | 0             | N/A           | N/A          | 1.528        | N/A               |
| Ausübbarer Bezugsrechte zum 31.12.2009                                            | N/A           | 0             | 0                 | 5.965         | 0             | N/A          | 1.390        | N/A               |
| Ausübbarer Bezugsrechte zum 31.12.2010                                            | N/A           | 0             | 0                 | 12.998        | 0             | 0            | 1.060        | N/A               |
| Aggregierter innerer Wert der unverfallbaren Bezugsrechte zum 31.12.2008 (Mio. €) | N/A           | N/A           | 0                 | 0             | N/A           | N/A          | 9,6          | N/A               |
| Aggregierter innerer Wert der unverfallbaren Bezugsrechte zum 31.12.2009 (Mio. €) | N/A           | 0             | 0                 | 0             | 0             | N/A          | 18,5         | N/A               |
| Aggregierter innerer Wert der unverfallbaren Bezugsrechte zum 31.12.2010 (Mio. €) | N/A           | 0             | 0                 | 15,5          | 0             | 0            | 22,4         | 0                 |
| Durchschnittlicher gewichteter Ausübungspreis (€)                                 | N/A           | N/A           | N/A               | 37,43         | 47,58         | 39,21        | 24,18        | N/A               |
| Rückstellung zum 31.12.2008 (Mio. €)                                              | 14,8          | N/A           | 2,1               | 35,8          | N/A           | N/A          | 37,1         | N/A               |
| Rückstellung zum 31.12.2009 (Mio. €)                                              | 12,1          | 5             | 0,1               | 53,3          | 14,3          | N/A          | 28,9         | N/A               |
| Rückstellung zum 31.12.2010 (Mio. €)                                              | 1,9           | 0             | 0                 | 59,4          | 35,8          | 3,9          | 24,0         | 22,1              |
| 2008 erfasster Aufwand (Mio. €)                                                   | 27,9          | N/A           | -0,9              | 23,6          | N/A           | N/A          | 8,3          | N/A               |
| 2009 erfasster Aufwand (Mio. €)                                                   | 5,9           | 14,3          | -1,9              | 19,6          | 5,0           | N/A          | 5,9          | N/A               |
| 2010 erfasster Aufwand (Mio. €)                                                   | -2,4          | -5,1          | -0,1              | 0,2           | 21,0          | 3,9          | 6,3          | 4,8               |

### a.1) STAR-Programme (STAR)

Im Rahmen der STAR-Programme haben wir Wertsteigerungsrechte gewährt, deren Wert sich nach der quartalsweisen Kursentwicklung der SAP-Aktie bemisst.

Die Einstiegswerte für den STAR 2008 und 2007 basieren auf dem Durchschnittskurs der SAP-Stammaktie an den 20 Börsentagen nach dem Tag der Veröffentlichung der vorläufigen Ergebnisse für das vorangegangene Geschäftsjahr und betrugen 32,69 € (STAR 2008) und 35,71 € (STAR 2007). Der Wert der STARS wird über einen Zeitraum von zwei Jahren für jedes Quartal ermittelt. Zur Ermittlung des endgültigen Wertes der STAR-Programme werden die Bewertungen der einzelnen acht Quartale wie folgt gewichtet:

#### Gewichteter Faktor pro Quartal

| 31. März | 30. Juni | 30. Sep. | 31. Dez. | 31. März | 30. Juni | 30. Sep. | 31. Dez. |
|----------|----------|----------|----------|----------|----------|----------|----------|
| 5 %      | 5 %      | 10 %     | 20 %     | 10 %     | 10 %     | 10 %     | 30 %     |

Maßgebend für den Wert des vierten und achten Quartals ist der Betrag, um den der Durchschnitt der Schlusskurse der SAP-Stammaktie an der Frankfurter Wertpapierbörse während der 20 Börsentage nach dem Tag der Veröffentlichung der vorläufigen Jahresergebnisse den Einstiegswert überschreitet. Die übrigen Quartalswerte basieren auf dem Wert, um den der Durchschnitt der Schlusskurse der SAP-Stammaktie während der ersten fünf Börsentage nach dem Tag der Veröffentlichung der SAP-Quartalsergebnisse den Einstiegswert überschreitet. Die Quartalswerte werden unabhängig voneinander gemessen und beeinflussen sich daher nicht gegenseitig.

Nach der Bestimmung des endgültigen Wertes der STAR-Programme erfolgt die Auszahlung in zwei gleichen Raten am 31. März und am 31. Januar des darauf folgenden Jahres. Voraussetzung für die Auszahlung von STARS ist grundsätzlich, dass der Begünstigte zu den Auszahlungsterminen für das jeweilige STAR-Programm weiterhin bei der SAP beschäftigt ist.

### a.2) STAR Performance Plan 2009 (STAR PP)

Im Rahmen des STAR PP 2009 haben wir Wertsteigerungsrechte gewährt, deren Wert sich nach der quartalsweisen

Kursentwicklung der SAP-Aktie im Vergleich zu einem branchenspezifischen Aktienkursindex bemisst.

Der Einstiegswert für den STAR PP basiert auf dem Durchschnittskurs der SAP-Stammaktie an den 20 Börsentagen nach dem Tag der Veröffentlichung der vorläufigen Ergebnisse für das vorangegangene Geschäftsjahr und betrug 28,00 €. Wie bei den STAR-Programmen wird der Wert des STAR PP über einen Zeitraum von zwei Jahren für jedes Quartal ermittelt, wobei die Bewertungen der acht Quartale ähnlich gewichtet werden.

Die Quartalswerte des STAR PP basieren auf der Wertsteigerung der SAP-Aktie im Vergleich zum TechPGL-Index, der sich aus zehn börsennotierten Unternehmen aus der Software-/Hardwarebranche zusammensetzt. Für diese Zwecke wurden in der STAR PP-Vereinbarung der Einstiegswert des Index (97,54 €) und der Einstiegswert der SAP-Aktie (28,00 €) festgelegt. Die Quartalsbewertung erfolgt an acht vorgegebenen Stichtagen im Zeitraum vom 10. Juni 2009 bis zum 10. März 2011. Die Kursentwicklung der SAP-Aktie im Vergleich zum TechPGL wird als Durchschnitt der letzten zehn Börsentage vor dem jeweiligen Stichtag ermittelt. Der endgültige Wert des STAR PP entspricht der Summe aus den acht Quartalswerten. Die maximale Auszahlung je STAR PP ist auf 110 % des STAR-Einstiegswertes begrenzt.

Die Auszahlung des Wertzuwachses der STARS erfolgt in zwei gleichen Raten am 31. März 2011 und am 31. Januar 2012. Voraussetzung für die Auszahlung von STARS ist grundsätzlich, dass der Begünstigte zu den Auszahlungsterminen für das jeweilige STAR-Programm weiterhin bei SAP beschäftigt ist.

### a.3) Incentive Plan 2010

Im Rahmen des Incentive Plan 2010 haben wir Leistungsträgern und ausgewählten Führungskräften Wertsteigerungsrechte gewährt, deren Wert an die mehrjährige Kursentwicklung der SAP-Aktie im Vergleich zu einem branchenspezifischen Aktienkursindex gekoppelt ist.

Der Plan sah nur dann eine Auszahlung vor, wenn sich die Marktkapitalisierung der SAP AG bis zum 31. Dezember 2010 um mindestens 50 % erhöht hätte. Da diese Bedingung nicht erfüllt war, erfolgte keine Auszahlung an die Teilnehmer des Programms.

#### **a.4) SAP Stock Option Plan 2007 (SAP SOP)**

Im Rahmen des SAP SOP 2007 haben wir ausgewählten Führungskräften und Leistungsträgern in den Jahren 2007 und 2008 virtuelle Aktienoptionen mit Barausgleich gewährt, deren Wert an die mehrjährige Kursentwicklung der SAP-Aktie gekoppelt ist.

Durch die Ausübung der im Rahmen des SAP SOP gewährten virtuellen Optionen erhalten die Mitarbeiter das Recht auf Erhalt eines bestimmten Geldbetrags gemäß den Vorschriften und Bedingungen dieses Plans. Die Rechte können erstmals nach einer Sperrfrist von zwei Jahren an elf vorher festgelegten Ausübungsterminen pro Kalenderjahr (jeweils ein Tag im Monat außer April) ausgeübt werden und haben eine Laufzeit von fünf Jahren ab dem Zeitpunkt der Gewährung.

Der Ausübungspreis beträgt 110 % des Einstiegswertes, der auf dem Durchschnittswert der Schlusskurse der SAP-Stammaktie an den 20 Börsentagen nach dem Tag der Veröffentlichung der vorläufigen Ergebnisse für das vorangegangene Geschäftsjahr basiert. Der Einstiegswert der 2008 und 2007 vergebenen Rechte betrug 32,69 € beziehungsweise 35,71 €.

Die Obergrenze für den auszuzahlenden Geldbetrag im Rahmen des SAP SOP beträgt 100 % des Ausübungspreises (39,28 € bei 2007 gewährten Optionen und 35,96 € bei 2008 gewährten Optionen).

#### **a.5) SOP Performance Plan 2009 (SOP PP)**

Im Rahmen des SOP PP 2009 haben wir Leistungsträgern und ausgewählten Führungskräften virtuelle Aktienoptionen mit Barausgleich gewährt, deren Wert sich nach der mehrjährigen Kursentwicklung der SAP-Aktie im Vergleich zu einem branchenspezifischen Aktienkursindex, dem TechPGL, bemisst.

Die zukünftigen Gewinne zum Ausübungszeitpunkt basieren auf der Wertsteigerung der SAP-Aktie im Vergleich zum TechPGL. Für diese Zwecke werden in der Vereinbarung für den SOP PP 2009 der Einstiegswert des TechPGL (97,54 €) und der Einstiegswert der SAP-Aktie (28,00 €) festgelegt. Die Rechte können erstmals nach einer Sperrfrist von zwei Jahren an zwölf vorher festgelegten Ausübungsterminen pro Kalenderjahr (jeweils ein Tag pro Monat) ausgeübt werden und haben eine Laufzeit von fünf Jahren ab dem Zeitpunkt der Gewährung.

Die Obergrenze für den auszuzahlenden Geldbetrag beträgt 110 % des Ausübungspreises (30,80 €).

#### **a.6) SAP Stock Option Plan 2010 (SOP 2010)**

Im Rahmen des SOP 2010 haben wir Mitgliedern des Senior-Leadership-Teams (SLT), den SAP Top Rewards (Leistungsträgern mit einer überdurchschnittlichen Beurteilung) sowie den Vorstandsmitgliedern virtuelle Aktienoptionen mit Barausgleich gewährt, deren Wert sich nach der mehrjährigen Kursentwicklung der SAP-Aktie bemisst.

Der Einstiegswert der 2010 vergebenen Rechte betrug 35,48 €. Er basiert auf dem Durchschnittswert der Schlusskurse der SAP-Stammaktie an den fünf Börsentagen vor dem Tag der Beschlussfassung des Vorstands.

Durch die Ausübung der im Rahmen des SOP 2010 gewährten virtuellen Optionen erhalten die Mitarbeiter das Recht auf Erhalt eines bestimmten Geldbetrags gemäß den Vorschriften und Bedingungen dieses Plans. Die Rechte können erstmals nach einer Sperrfrist von drei Jahren (vier Jahren bei Vorstandsmitgliedern) an elf vorher festgelegten Ausübungsterminen pro Kalenderjahr (jeweils ein Tag im Monat außer April) ausgeübt werden und haben eine Laufzeit von sechs Jahren (sieben Jahren bei Vorstandsmitgliedern) ab dem Zeitpunkt der Gewährung.

Der Ausübungspreis beträgt 110 % des Einstiegswertes (115 % für Vorstandsmitglieder) (39,03 € beziehungsweise 40,80 € je Option für die 2010 gewährten Rechte).

Die Obergrenze für den auszuzahlenden Geldbetrag beträgt 100 % (150 % für Vorstandsmitglieder) des Ausübungspreises.

#### **a.7) Vergütungspläne mit Barausgleich von Business Objects auf der Basis früherer, von Business Objects gewährter Rechte (BO-Rechte)**

Vor dem Erwerb durch SAP erhielten die Mitarbeiter der Unternehmen von Business Objects Rechte auf den Bezug von Business-Objects-Aktien. Nach dem Erwerb von Business Objects im Jahr 2008 wurden die Business-Objects-Aktien nicht länger öffentlich gehandelt und es wurden Mechanismen eingeführt, um den Mitarbeitern eine Vergütung für ihre Bezugsrechte zu ermöglichen. Sie erhielten entweder eine Barzahlung anstelle von Business-Objects-Aktien (Barzahlung, Cash Payment Mechanism, CPM) oder Business-Objects-Aktien mit anschlie-

ßendem Weiterverkauf der Aktien an SAP France (Liquiditätsvereinbarung, Liquidity Agreement Mechanism, LAM). Zwischenzeitlich wurde Business Objects auf SAP France verschmolzen. Die Umsetzung des CPM und des LAM führte im Grunde zu einer Umwandlung der anteilsbasierten Vergütungen mit Ausgleich durch Eigenkapitalinstrumente in anteilsbasierte Vergütungen mit Barausgleich (Ersatzrechte), mit denen die ursprünglich gewährten Aktienoptionen und Mitarbeiterbeteiligungen (Restricted Stock Units, RSU) ersetzt wurden (ersetzte Rechte).

Die ersetzten Rechte hatten einen Erdienungszeitraum von zwei bis fünf Jahren und eine vertragliche Laufzeit von zwei bis zehn Jahren.

Die Ersatzrechte spiegeln die Bedingungen der ersetzten Rechte nahezu identisch wider (einschließlich Bedingungen wie Ausübungspreis und Unverfallbarkeit), außer dass

- die ersetzten Rechte einen Ausgleich durch die Ausgabe von Eigenkapitalinstrumenten vorsahen, wohingegen die Ersatzrechte entweder über den CPM oder den LAM in bar ausgeglichen werden,
- die ersetzten Rechte auf den Kurs der Business-Objects-Aktie indexiert wurden, wohingegen die Ersatzrechte auf den Kurs der SAP-Aktie wie folgt indexiert werden: Der im Rahmen des Übernahmeangebots von SAP unterbreitete Angebotspreis für Business-Objects-Aktien (42,00 €) wird durch den Kurs der SAP-Aktie bei Ablauf des Erwerbsangebots dividiert (32,28 €); das so ermittelte Ergebnis wird mit dem gewichteten durchschnittlichen Schlusskurs der SAP-Aktie in den 20 Handelstagen unmittelbar vor dem Ausübungs- oder Veräußerungsdatum multipliziert.

Der finanzielle Nutzen aus der Ausübung der Aktienoption oder der Unverfallbarkeit der RSU wird direkt an die Mitarbeiter ausgezahlt (in Ländern, in denen der CPM Anwendung findet), oder die Mitarbeiter erhalten bei Ausübung der Aktienoptionen oder Unverfallbarkeit der RSU weiterhin Aktien von Business Objects (in Ländern, in denen der LAM Anwendung findet). In diesen Fällen haben die Mitarbeiter innerhalb von drei Monaten ab der Ausübung ein Recht zum Weiterverkauf der Aktien an SAP (Put-Option). Die SAP hat ihrerseits ein Recht auf den Bezug dieser Aktien (Call-Option).

In beiden Fällen werden die Bezugsrechte als Vergütungen mit Barausgleich bilanziert, da die Verpflichtung gegenüber dem

Mitarbeiter sowohl beim CPM als auch beim LAM letztendlich nur in bar abgegolten wird.

#### **a.8) Vergütungspläne mit Barausgleich von Sybase auf der Basis früherer, von Sybase gewährter Rechte (Sybase-Rechte)**

Nach den Bedingungen des Kaufvertrages war SAP verpflichtet, von Sybase-Mitarbeitern gehaltene, ausstehende Mitarbeiterbeteiligungsrechte (Restricted Stock Awards, RSA) gegen anteilsbasierte Vergütungsprogramme von SAP zu tauschen (Sybase-Rechte).

Die zum Erwerbszeitpunkt ausstehenden RSA wurden in das Recht umgewandelt, zu den ursprünglich vereinbarten Ausübungsterminen einen Geldbetrag in Höhe der zu diesem Zeitpunkt gehaltenen RSA, multipliziert mit 65,00 US\$ je Aktie, zu erhalten.

Zum Erwerbszeitpunkt standen 745.445 RSA mit einem beizulegenden Zeitwert von insgesamt 35,9 Mio. € aus (ermittelt unter Berücksichtigung des in Abhängigkeit von Gewährungszeitpunkten sowie verbleibenden Erdienungszeiträumen erwarteten Verfalls von Rechten). Hiervon entfallen 18,2 Mio. € auf den zum Erwerbszeitpunkt jeweils verstrichenen Teil der Erdienungszeiträume (verdienter Teil). Der unverdiente Teil der voraussichtlich auszuzahlenden RSA beträgt zum Erwerbszeitpunkt 17,7 Mio. €. Der verbleibende Erdienungszeitraum für noch nicht unverfallbare RSA beträgt zum Erwerbszeitpunkt ungefähr 1,5 Jahre (entsprechend den ursprünglich vereinbarten Ausübungsterminen). Vom 1. August 2010 bis 31. Dezember 2010 wurden 8.472 Sybase-Rechte über einen Gesamtbetrag von 0,4 Mio. € ausgeübt und an Sybase-Mitarbeiter ausgezahlt. Der 2010 erfasste Aufwand für Sybase-Rechte belief sich auf 4,8 Mio. €. Der noch nicht erfasste Aufwand für Sybase-Rechte betrug am 31. Dezember 2010 12,4 Mio. € und wird über den verbleibenden Erdienungszeitraum von 1,1 Jahren erfasst.

#### **b) Anteilsbasierte Vergütungsprogramme mit Ausgleich durch Eigenkapitalinstrumente**

Die Programme mit Ausgleich durch Eigenkapitalinstrumente umfassen den Share Matching Plan (SMP), die Aktiensparpläne für Mitarbeiter (EDSP), das Vermögensbeteiligungsprogramm, den Stock Option Plan 2002 und den Long Term Incentive Plan 2000. Infolge der am 21. Dezember 2006 umgesetzten Kapitalerhöhung aus Gesellschaftsmitteln und der damit verbundenen Ausgabe von kostenlosen Bonus-Aktien im

---

Verhältnis von eins zu drei berechtigt jede Aktienoption beziehungsweise jedes Wandlungsrecht aus den Programmen SOP 2002 und LTI 2000 jetzt zum Bezug von vier Aktien. Aus Gründen der besseren Vergleichbarkeit mit dem Kursniveau der SAP-Aktie seit dem 21. Dezember 2006 wird in den Tabellen unter Textziffer b.4 und b.5 nicht die Anzahl der Rechte, sondern die Anzahl der Aktien angegeben, zu deren Bezug die Aktienoptionen oder Wandlungsrechte berechtigen. Die angegebenen Ausübungspreise sind dementsprechend je Aktie und nicht je Option angegeben. Die Zahl der Aktienoptionen entspricht einem Viertel der angegebenen Aktienzahl, die Ausübungspreise je Aktienoption entsprechen dem Vierfachen der angegebenen Ausübungspreise je Aktie.

#### **b.1) Share Matching Plan**

Im Rahmen des 2010 eingeführten Share Matching Plan (SMP) bieten wir unseren Mitarbeitern die Möglichkeit, SAP-Aktien mit einem Preisabschlag von 40 % zu erwerben. Es kann ein bestimmter Prozentsatz vom jährlichen Grundgehalt des Mitarbeiters in den SMP eingezahlt werden. Nach Ende einer dreijährigen Veräußerungssperre erhalten die Planteilnehmer für drei zuvor erworbene SAP-Aktien kostenlos jeweils eine weitere SAP-Aktie. Die Bedingungen für Mitglieder des Senior Leadership Teams (SLT) weichen geringfügig von denen für Mitarbeiter ab. Die Mitglieder des SLT erhalten beim Erwerb der Aktien keine Ermäßigung, sind jedoch nach Ablauf der dreijährigen Sperrfrist zum kostenlosen Bezug von jeweils zwei SAP-Aktien für drei zuvor erworbene SAP-Aktien berechtigt. Dieses Programm steht Mitgliedern des SAP-Vorstands nicht offen.

Am 20. August 2010 legte der SAP-Vorstand den Kaufpreis für den SMP auf 35,12 € je Aktie fest. Am 8. September 2010 (Ablauf der Angebotsfrist) kauften SAP-Mitarbeiter 1,6 Millionen Aktien. Nach Ende der dreijährigen Sperrfrist werden voraussichtlich rund 0,5 Mio. kostenlose Bonus-Aktien (489.416 an Mitarbeiter und 82.090 an das SLT) übertragen, sofern sich die erworbenen Aktien nach Ablauf der drei Jahre weiterhin in ihrem Besitz befinden. Der beizulegende Zeitwert der kostenlosen Bonus-Aktien zum Zeitpunkt der Gewährung wurde auf 33,71 € je Aktie geschätzt. Dieser Berechnung liegen die folgenden Parameter zugrunde: risikoloser Zinssatz 0,82 %, Dividendenrendite 1,65 % und erwartete Laufzeit 3 Jahre.

Unser Personalaufwand für dieses Programm betrug im Geschäftsjahr 2010 26,4 Mio. €. Davon entfallen 21,1 Mio. € auf den 40%igen Preisabschlag beim Erwerb der SMP-Aktien,

1,7 Mio. € auf die Verteilung des beizulegenden Zeitwertes der kostenlosen Bonus-Aktien über den Erdienungszeitraum und 3,6 Mio. € auf den zusätzlichen Abschlag, der im Rahmen des Vermögensbeteiligungsprogramms gewährt wurde, das jetzt Bestandteil des SMP ist (siehe Textziffer b.3). Der nicht erfasste Aufwand zum 31. Dezember 2010 im Zusammenhang mit kostenlosen Bonus-Aktien wird unter Berücksichtigung eines geschätzten Verfalls von Rechten auf 14,7 Mio. € geschätzt und über den verbleibenden Erdienungszeitraum von 2,7 Jahren erfasst.

#### **b.2) Aktiensparplan für Mitarbeiter (EDSP)**

Im Rahmen des EDSP bieten wir Mitarbeitern die Möglichkeit, monatlich SAP-Aktien mit einem Rabatt von 15 % zu erwerben. Es kann ein bestimmter Prozentsatz vom jährlichen Grundgehalt des Mitarbeiters in solche Pläne eingezahlt werden. Unser Personalaufwand für diese Programme betrug im Geschäftsjahr 2010 2,9 Mio. € (2009: 2,8 Mio. €; 2008: 3,3 Mio. €).

#### **b.3) Vermögensbeteiligungsprogramm**

Mitarbeiter in Deutschland können SAP-Aktien im Rahmen des Vermögensbeteiligungsprogramms mit einer jährlichen Vergünstigung von 260 € erwerben. Unser Personalaufwand für dieses Programm betrug 2009 3,8 Mio. € (2008: 3,6 Mio. €). Ab 2010 wurde dieses Programm in den Share Matching Plan einbezogen, sodass sich der Erwerbspreis der SAP-Aktien für Mitarbeiter zusätzlich zu dem gewährten Mitarbeiterabbat von 40 % weiter reduziert.

#### **b.4) SAP Stock Option Plan 2002 (SAP SOP 2002)**

Im Rahmen des SAP SOP 2002 haben wir Aktienoptionen gewährt, deren Wert von der mehrjährigen Kursentwicklung der SAP-Aktie abhängig ist. Die letzten Bezugsrechte nach dem SAP SOP 2002 wurden 2006 gewährt. Der Plan stand ausgewählten Führungskräften und Leistungsträgern offen.

Jede Aktienoption gewährt dem Inhaber das Recht auf den Bezug von vier Aktien der SAP AG gegen Zahlung des Ausübungspreises. Der Ausübungspreis für eine Aktie entspricht 110 % des Basispreises. Der Basispreis ist der durchschnittliche Börsenkurs der Stammaktie der SAP AG an der Frankfurter Wertpapierbörse an den letzten fünf Börsentagen vor Ausgabe der jeweiligen Aktienoption. Der Ausübungspreis entspricht mindestens dem Schlussauktionspreis am Tag vor der Ausgabe der jeweiligen Aktienoption. Die Aktienoptionen haben eine vertragliche Laufzeit von fünf Jahren. Der beizu-



liegende Zeitwert dieser Optionen wurde auf Basis des Black-Scholes-Merton-Optionspreismodells bestimmt.

Die im Rahmen des SAP SOP 2002 ausstehenden und ausüb-  
baren Optionen haben sich in den Jahren 2010 und 2009  
wie folgt entwickelt:

## Entwicklung SAP SOP 2002

|                               | Anzahl der ausstehenden/<br>ausübenden Optionen | Gewichteter durchschnittlicher<br>Ausübungspreis je Option | Gewichtete durchschnittliche<br>Restlaufzeit | Aggregierter innerer Wert |
|-------------------------------|-------------------------------------------------|------------------------------------------------------------|----------------------------------------------|---------------------------|
|                               | Tsd.                                            | €                                                          | Jahre                                        | Mio. €                    |
| <b>Bestand per 31.12.2008</b> | <b>19.846</b>                                   | <b>38,83</b>                                               | <b>1,1</b>                                   | <b>0</b>                  |
| Ausgeübt                      | -15                                             | 33,55                                                      | 0,0                                          | 0                         |
| Verwirkt oder verfallen       | -6.575                                          | 37,83                                                      | 0,0                                          | 0                         |
| <b>Bestand per 31.12.2009</b> | <b>13.256</b>                                   | <b>39,34</b>                                               | <b>0,6</b>                                   | <b>0</b>                  |
| Ausgeübt                      | -2.855                                          | 33,55                                                      | 0,0                                          | 0                         |
| Verwirkt oder verfallen       | -5.059                                          | 35,05                                                      | 0,0                                          | 0                         |
| <b>Bestand per 31.12.2010</b> | <b>5.342</b>                                    | <b>46,48</b>                                               | <b>0,1</b>                                   | <b>0</b>                  |

Da die Wartezeiten für alle im Rahmen des SAP SOP 2002  
ausgegebenen Optionen bereits in früheren Jahren vollständig  
abgelaufen waren, fielen für dieses Programm im Geschäfts-  
jahr 2010 keine Vergütungsanwendungen an (2008: 0,8 Mio. €).  
Aufgrund einer Modifizierung des Programms ergab sich  
2009 ein Aufwand in Höhe von 2,1 Mio. €. Der gesamte innere

Wert der in den Geschäftsjahren 2010, 2009 und 2008 aus-  
geübten Optionen lag bei 0 Mio. € (2009: unter 1 Mio. €; 2008:  
21 Mio. €).

In der folgenden Tabelle sind die Angaben zu den Aktienoptionen  
des SAP SOP 2002 zusammengefasst, die am 31. Dezember  
2010 und 2009 im Umlauf waren:

## Ausstehende Aktienoptionen SAP SOP 2002 am 31.12.2010 und 31.12.2009

| Ausstehende und ausübende Aktienoptionen am<br>31.12.2010 |                              |                                                 |                                                    | Ausstehende und ausübende Aktienoptionen am<br>31.12.2009 |                                                 |                                                    |
|-----------------------------------------------------------|------------------------------|-------------------------------------------------|----------------------------------------------------|-----------------------------------------------------------|-------------------------------------------------|----------------------------------------------------|
| Ausübungspreis                                            | Anzahl der<br>Aktienoptionen | Gewichtete<br>durchschnittliche<br>Restlaufzeit | Innerer Wert<br>der unverfallbaren<br>Bezugsrechte | Anzahl der<br>Aktienoptionen                              | Gewichtete<br>durchschnittliche<br>Restlaufzeit | Innerer Wert<br>der unverfallbaren<br>Bezugsrechte |
| €                                                         | Tsd.                         | Jahre                                           | Mio. €                                             | Tsd.                                                      | Jahre                                           | Mio. €                                             |
| 33,55                                                     |                              |                                                 |                                                    | 7.326                                                     | 0,11                                            | 0,0                                                |
| 46,48                                                     | 5.342                        | 0,10                                            | 0,0                                                | 5.930                                                     | 1,10                                            | 0,0                                                |
| <b>33,55 bis 46,48</b>                                    | <b>5.342</b>                 | <b>0,10</b>                                     | <b>0,0</b>                                         | <b>13.256</b>                                             | <b>0,55</b>                                     | <b>0,0</b>                                         |

Der gewichtete durchschnittliche Kurs der SAP-Stammaktien zu den Ausübungszeitpunkten der Aktienoptionen im Rahmen des SAP SOP 2002 betrug im Jahr 2010 33,08 € (2009: 34,19 €; 2008: 34,32 €).

#### b.5) Long Term Incentive Plan 2000 (LTI-Plan 2000)

Im Rahmen des LTI-Plans 2000 gewährten wir Wandelschuldverschreibungen, deren Wert von der mehrjährigen Kursentwicklung der SAP-Aktie abhängig war, sowie Aktienoptionen, deren Wert sich nach der mehrjährigen Kursentwicklung der SAP-Aktie im Vergleich zu einem branchenspezifischen Aktienkursindex bemaß. Die letzten Bezugsrechte des LTI-Plans 2000 wurden im Jahr 2002 gewährt. Der Plan stand ausgewählten Führungskräften und Leistungsträgern offen.

Der LTI-Plan 2000 räumte den Berechtigten ein Wahlrecht zwischen Wandelschuldverschreibungen, Aktienoptionen oder einer 50/50-Kombination dieser Alternativen ein. Ein Berechtigter, der sich für Aktienoptionen entschieden hat, erhielt im Vergleich zum Bezug von Wandelschuldverschreibungen die 1,25-fache Stückzahl. Jede Wandelschuldverschreibung hat einen Nominalwert von 1 € und eine Laufzeit von maximal zehn Jahren. Sie berechtigt zum Bezug von vier Stammaktien der SAP AG, wobei bestimmte Sperrfristen zu beachten sind. Der Wandlungspreis entspricht dem im Xetra-Handel notierten Schlusskurs der SAP-Stammaktie am letzten Börsentag vor der Ausgabe der jeweiligen Wandelschuldverschreibung. Sie kann innerhalb eines Zeitraums von maximal zehn Jahren ausgeübt werden, wobei die gleichen Sperrfristen gelten wie für die Wandelschuldverschreibungen. Der Ausübungspreis richtet sich danach, inwieweit die Kursentwicklung der SAP-Aktie im Zeitraum zwischen dem letzten Börsentag vor der Ausgabe der Aktienoption und dem letzten Börsentag vor ihrer Ausübung die entsprechende Wertentwicklung des S&P North Software-Software Index (ehemals GSTI Software Index) übersteigt. Vom Zeitpunkt der Gewährung an konnten 33 % der Optionen beziehungsweise Wandelschuldverschreibungen nach zwei Jahren, weitere 33 % nach drei Jahren und die restlichen 34 % nach vier Jahren ausgeübt werden.

Bis zum 14. März 2002 wurden im Rahmen des LTI-Plans 2000 49,2 Millionen Wandlungs- und Bezugsrechte ausgegeben.

Die unter dem LTI-Plan 2000 gewährten Aktienoptionen und Wandelschuldverschreibungen haben sich in den Jahren 2010 und 2009 wie folgt entwickelt:

#### Übersicht über den LTI-Plan 2000

|                                    | Anzahl der<br>ausstehenden<br>Optionen | Gewichteter<br>durch-<br>schnittlicher<br>Ausübungs-<br>preis<br>je Option | Gewichtete<br>durch-<br>schnittliche<br>Restlaufzeit | Aggregierter<br>innerer Wert |
|------------------------------------|----------------------------------------|----------------------------------------------------------------------------|------------------------------------------------------|------------------------------|
|                                    | Tsd.                                   | €                                                                          | Jahre                                                | Mio. €                       |
| <b>Aktienoptionen</b>              |                                        |                                                                            |                                                      |                              |
| <b>Bestand per 31.12.2008</b>      | <b>3.022</b>                           | <b>17,95</b>                                                               | <b>2,7</b>                                           | <b>22</b>                    |
| Ausgeübt                           | -763                                   | 24,04                                                                      | 0,0                                                  | 0                            |
| Verwirkt                           | -24                                    | 26,45                                                                      | 0,0                                                  | 0                            |
| <b>Bestand per 31.12.2009</b>      | <b>2.235</b>                           | <b>26,07</b>                                                               | <b>1,8</b>                                           | <b>15</b>                    |
| Ausgeübt                           | -459                                   | 32,60                                                                      | 0,0                                                  | 0                            |
| Verwirkt                           | -96                                    | 31,89                                                                      | 0,0                                                  | 0                            |
| <b>Bestand per 31.12.2010</b>      | <b>1.680</b>                           | <b>36,13</b>                                                               | <b>0,9</b>                                           | <b>3</b>                     |
| <b>Wandelschuldverschreibungen</b> |                                        |                                                                            |                                                      |                              |
| <b>Bestand per 31.12.2008</b>      | <b>23.730</b>                          | <b>50,59</b>                                                               | <b>2,2</b>                                           | <b>0</b>                     |
| Verwirkt                           | -1.197                                 | 53,10                                                                      | 0,0                                                  | 0                            |
| <b>Bestand per 31.12.2009</b>      | <b>22.533</b>                          | <b>50,46</b>                                                               | <b>1,2</b>                                           | <b>0</b>                     |
| Verwirkt                           | -6.644                                 | 68,00                                                                      | 0,0                                                  | 0                            |
| <b>Bestand per 31.12.2010</b>      | <b>15.889</b>                          | <b>43,12</b>                                                               | <b>0,6</b>                                           | <b>0</b>                     |

Sämtliche am 31. Dezember 2010 noch ausstehenden Wandelschuldverschreibungen und Aktienoptionen können ausgeübt werden.

In der folgenden Tabelle sind die Angaben zu den Aktienoptionen und Wandelschuldverschreibungen aufgeführt, die am 31. Dezember 2010 in Umlauf waren:

#### Ausstehende Rechte aus dem LTI-Plan 2000 am 31.12.2010

| Ausstehende Aktienoptionen |                           |                                           |                                               | Ausübbarer Aktienoptionen |                                               |
|----------------------------|---------------------------|-------------------------------------------|-----------------------------------------------|---------------------------|-----------------------------------------------|
| Spanne der Ausübungspreise | Anzahl der Aktienoptionen | Gewichtete durchschnittliche Restlaufzeit | Gewichteter durchschnittlicher Ausübungspreis | Anzahl der Aktienoptionen | Gewichteter durchschnittlicher Ausübungspreis |
| €                          | Tsd.                      | Jahre                                     | €                                             | Tsd.                      | €                                             |
| 30,62                      | 391                       | 0,14                                      | 30,62                                         | 391                       | 30,62                                         |
| 34,18                      | 12                        | 0,56                                      | 34,18                                         | 12                        | 34,18                                         |
| 37,83                      | 1.277                     | 1,14                                      | 37,83                                         | 1.277                     | 37,83                                         |
| <b>30,62 bis 37,83</b>     | <b>1.680</b>              | <b>0,9</b>                                | <b>36,13</b>                                  | <b>1.680</b>              | <b>36,13</b>                                  |

| Ausstehende Wandelschuldverschreibungen |                                        |                                           |                                               | Ausübbarer Wandelschuldverschreibungen |                                               |
|-----------------------------------------|----------------------------------------|-------------------------------------------|-----------------------------------------------|----------------------------------------|-----------------------------------------------|
| Spanne der Ausübungspreise              | Anzahl der Wandelschuldverschreibungen | Gewichtete durchschnittliche Restlaufzeit | Gewichteter durchschnittlicher Ausübungspreis | Anzahl der Wandelschuldverschreibungen | Gewichteter durchschnittlicher Ausübungspreis |
| €                                       | Tsd.                                   | Jahre                                     | €                                             | Tsd.                                   | €                                             |
| 32,95 bis 40,00                         | 7.510                                  | 1,13                                      | 37,89                                         | 7.510                                  | 37,89                                         |
| 47,81                                   | 8.379                                  | 0,14                                      | 47,81                                         | 8.379                                  | 47,81                                         |
| <b>32,95 bis 47,81</b>                  | <b>15.889</b>                          | <b>0,61</b>                               | <b>43,12</b>                                  | <b>15.889</b>                          | <b>43,12</b>                                  |

Der gewichtete durchschnittliche Kurs der SAP-Stammaktien zu den Ausübungszeitpunkten der Aktienoptionen im Rahmen des LTI-Plans betrug im Jahr 2010 34,82 € (2009: 31,30 €; 2008: 35,59 €). Der gewichtete durchschnittliche Kurs der SAP-Stammaktie zu den Ausübungszeitpunkten der Wandelschuldverschreibung im Rahmen des LTI-Plans 2000 betrug 37,44 € im Jahr 2008 (keine Ausübung seit dem Jahr 2009).

---

Da alle Optionen des LTI-Plans 2000 bereits im Jahr 2006 unverfallbar waren, ergab sich 2007 und in späteren Geschäftsjahren diesbezüglich kein Personalaufwand. Der beizulegende Zeitwert der im Rahmen dieses Plans gewährten Optionen und Wandelschuldverschreibungen wurde auf Basis des Black-Scholes-Merton-Optionspreismodells bestimmt. Der gesamte innere Wert der in den Geschäftsjahren 2010, 2009 und 2008 ausgeübten Optionen lag bei 2,9 Mio. € (2009: 8,9 Mio. €; 2008: 5,1 Mio. €). Der gesamte innere Wert der im Geschäftsjahr 2008 ausgeübten Wandelschuldverschreibungen betrug 0 Mio. € (keine Ausübung seit dem Jahr 2009).

## **(29) Segmentinformationen**

In unserem internen Berichtswesen bilden wir die Unternehmenstätigkeit differenziert ab, zum Beispiel nach Sparte, Region und den Verantwortungsbereichen der Vorstandsmitglieder. Auf Basis dieses Berichtswesens beurteilt unser Vorstand, der als Hauptentscheidungsträger (Chief Operating Decision Maker, CODM) für den Erfolg der verschiedenen Geschäftsbereiche und die Allokation der Ressourcen verantwortlich ist, die Geschäftstätigkeit unter verschiedenen Gesichtspunkten. Bis zum zweiten Quartal 2010 hatten wir mit den Bereichen Produkt, Beratung und Schulung nur drei berichtspflichtige operative Segmente bestimmt, die nach unseren Geschäftsfeldern organisiert waren. Nach dem Erwerb von Sybase im Juli 2010 haben wir ein dediziertes Segment Sybase zusätzlich zu unseren bereits bestehenden Segmenten eingeführt. Die Segmentberichterstattung wurde daher um ein neues Segment ergänzt, das zwar als „Sybase“ bezeichnet wird, jedoch nicht mit dem erworbenen Unternehmen Sybase identisch ist. Bestimmte Tätigkeitsbereiche des erworbenen Unternehmens wurden integriert und werden somit in den bisherigen drei Segmenten ausgewiesen, während bestimmte SAP-Aktivitäten, die vor dem Zusammenschluss mit Sybase bereits bestanden, in das Segment Sybase umgegliedert wurden. In den Segmenten werden die Umsätze entsprechend den Vertriebsverantwortlichkeiten ausgewiesen und nicht nach dem verkauften Produkt. Insofern ist das Sybase Segment in der Lage, Umsätze sowohl durch den Verkauf von SAP-Produkten als auch von Sybase-Produkten zu erzielen, während die Umsätze, die in den anderen Segmenten ausgewiesen werden, sowohl auf den Verkauf von SAP als auch von Sybase-Produkten zurückzuführen sind, sofern dieser Verkauf durch SAP Mitarbeiter zustande kam.

Die Aktivitäten im Produktsegment erstrecken sich hauptsächlich auf den Vertrieb und die Lizenzierung unserer Software, die Realisierung maßgeschneiderter Entwicklungsprojekte sowie auf die technische Unterstützung (Support) unserer Software. Das Beratungssegment umfasst zahlreiche fachliche Leistungen, vor allem aber die Unterstützung von Kunden bei der Implementierung unserer Software. Das Segment Schulung umfasst Ausbildungsveranstaltungen zur Nutzung unserer Softwareprodukte und zu verwandten Themen für Kunden und Partner. Das Segment Sybase erzielt seine Umsatzerlöse mit der Lizenzierung eines breiten Spektrums von Softwareprodukten, darunter Unternehmens- und mobile Datenbanken, Middleware, Software für Synchronisierung, Verschlüsselung und Gerätemanagement, sowie mit Support, fachlichen Leistungen und Schulungen für diese Softwareprodukte und dem Angebot von Messaging-Services.

Für Zwecke der internen Berichterstattung werden Transfers zwischen den einzelnen operativen Segmenten als Reduzierung der Kosten und nicht als interne Umsätze erfasst. Diese Transfers bestehen hauptsächlich darin, dass Mitarbeiter eines Segments auf Projektbasis in einem anderen Segment eingesetzt werden. Transfers zwischen den Segmenten werden einschließlich bestimmter indirekter Gemeinkosten zu den internen Kostensätzen (aber ohne Gewinnmarge) verbucht.

Nach unserer Entscheidung, die US-GAAP-Berichterstattung Ende 2009 einzustellen, basieren die Rechnungslegungsmethoden, die in der internen Berichterstattung an unsere Hauptentscheidungsträger angewendet werden, ab 2010 auf IFRS. Dies wirkt sich auch auf die Vorjahreswerte aus, die entsprechend angepasst wurden.

Die Rechnungslegungsmethoden im Rahmen der internen Berichterstattung an unsere Hauptentscheidungsträger weichen in folgenden Punkten von den in Textziffer (3) beschriebenen Bilanzierungs- und Bewertungsmethoden gemäß IFRS ab:

- Im Rahmen der internen Berichterstattung an unsere Hauptentscheidungsträger werden Umsätze unabhängig von ihrer Klassifizierung in unserer Gewinn- und Verlustrechnung grundsätzlich dem Segment zugeordnet, das für die jeweilige Transaktion verantwortlich ist. Daher kann beispielsweise der Umsatz des Segments Schulung Beträge enthalten, die in unserer Gewinn- und Verlustrechnung als Softwareerlöse

klassifiziert wurden. Umsatz für Sybase-Produkte kann in den Segmentumsätzen aller vier Segmente ausgewiesen sein.

- Aufwendungen für anteilsbasierte Vergütungsprogramme und – seit 2009 – Restrukturierungsaufwendungen sind nicht Gegenstand der internen Berichterstattung auf Segmentebene an unsere Hauptentscheidungsträger. Diese Art von Aufwendungen wurden in allen dargestellten Jahren ausschließlich auf Konzernebene gesteuert und überwacht.
- Unterschiede in der Fremdwährungsumrechnung führen zu Abweichungen zwischen den Beträgen der internen Berichterstattung an unsere Hauptentscheidungsträger und den entsprechenden Angaben im Konzernabschluss.
- Die Umsatzerlöse in der internen Berichterstattung an unsere Hauptentscheidungsträger enthalten Supporterlöse, welche das übernommene Unternehmen als eigenständiges Unternehmen ausgewiesen hätte, die jedoch aufgrund der Bewertung der zum Erwerbszeitpunkt bestehenden Supportverträge zum beizulegenden Zeitwert gemäß IFRS nicht als Umsatzerlöse ausgewiesen werden.

- Die Ertragskennzahlen in der internen Berichterstattung an unsere Hauptentscheidungsträger enthalten den vollen Betrag der Supporterlöse, aber nicht die folgenden akquisitionsbedingten Aufwendungen sowie die nicht fortgeführten Geschäftstätigkeiten:
  - Aufwendungen für die planmäßige Abschreibung/Wertminderung von immateriellen Vermögenswerten, die im Rahmen von Unternehmenszusammenschlüssen und gezielten Einzelerwerben von geistigem Eigentum erworben wurden
  - Aufwendungen für nicht abgeschlossene Forschungs- und Entwicklungsprojekte
  - Restrukturierungsaufwendungen und Abwicklung von bereits vor dem Zusammenschluss bestehenden Beziehungen zwischen dem Erwerber und dem erworbenen Unternehmen
  - Akquisitionsbedingte Kosten Dritter, die als Aufwand erfasst werden müssen
  - Ergebnisse aus nicht fortgeführten Geschäftstätigkeiten, die als solche alle Voraussetzungen nach IFRS erfüllen, außer dass sie keinen gesonderten, wesentlichen Geschäftszweig darstellen. Für die Jahre 2010, 2009 und 2008 bezieht sich dies ausschließlich auf die Tätigkeiten von TomorrowNow.

## Umsatzerlöse und Ergebnisse der operativen Segmente

| Mio. €                                   | Produkt | Beratung | Schulung | Sybase | Gesamt |
|------------------------------------------|---------|----------|----------|--------|--------|
| <b>2010</b>                              |         |          |          |        |        |
| Umsatzerlöse der operativen Segmente     | 9.020   | 2.714    | 362      | 387    | 12.483 |
| Segmentbeitrag                           | 5.395   | 746      | 136      | 127    | 6.404  |
| Den Segmenten zugeordnete Abschreibungen | -17     | -8       | -2       | -7     | -34    |
| <b>2009</b>                              |         |          |          |        |        |
| Umsatzerlöse der operativen Segmente     | 7.846   | 2.498    | 332      | N/A    | 10.676 |
| Segmentbeitrag                           | 4.731   | 781      | 115      | N/A    | 5.627  |
| Den Segmenten zugeordnete Abschreibungen | -53     | -7       | -2       | N/A    | -62    |
| <b>2008</b>                              |         |          |          |        |        |
| Umsatzerlöse der operativen Segmente     | 8.366   | 2.824    | 525      | N/A    | 11.715 |
| Segmentbeitrag                           | 4.696   | 789      | 225      | N/A    | 5.710  |
| Den Segmenten zugeordnete Abschreibungen | -64     | -8       | -2       | N/A    | -74    |

## Überleitung der Segmentumsätze und -ergebnisse

| Mio. €                                                         | 2010          | 2009          | 2008          |
|----------------------------------------------------------------|---------------|---------------|---------------|
| Umsatzerlöse der operativen Segmente                           | 12.483        | 10.676        | 11.715        |
| Umsatzerlöse der übrigen Unternehmensteile                     | 55            | 7             | 16            |
| Anpassung Supporterlöse                                        | -74           | -11           | -166          |
| Umsatzerlöse aus nicht fortgeführten Geschäftstätigkeiten      | 0             | 0             | 10            |
| <b>Umsatzerlöse</b>                                            | <b>12.464</b> | <b>10.672</b> | <b>11.575</b> |
| Segmentbeitrag                                                 | 6.404         | 5.627         | 5.710         |
| Umsatzerlöse der übrigen Unternehmensteile                     | 55            | 7             | 16            |
| Forschungs- und Entwicklungsaufwendungen (aus Managementsicht) | -1.800        | -1.801        | -1.620        |
| Verwaltungs- und sonstige Aufwendungen (aus Managementsicht)   | -651          | -659          | -734          |
| Aktienorientierte Vergütungsprogramme                          | -58           | -54           | -63           |
| Restrukturierungsaufwendungen                                  | -2            | -194          | -8            |
| Akquisitionsbedingte Restrukturierungsaufwendungen             | 5             | -4            | -52           |
| Akquisitionsbedingte Aufwendungen                              | -305          | -267          | -286          |
| Anpassung Supporterlöse                                        | -74           | -11           | -166          |
| Ergebnis aus nicht fortgeführten Geschäftstätigkeiten          | -983          | -56           | -96           |
| <b>Betriebsergebnis</b>                                        | <b>2.591</b>  | <b>2.588</b>  | <b>2.701</b>  |
| Sonstige Aufwendungen und Erträge, netto                       | -186          | -73           | -27           |
| Finanzergebnis, netto                                          | -67           | -80           | -50           |
| <b>Gewinn vor Ertragsteuern</b>                                | <b>2.338</b>  | <b>2.435</b>  | <b>2.624</b>  |

### Segmentumsätze

Die Umsätze der übrigen Unternehmensteile enthalten hauptsächlich unwesentliche Umsätze und Währungsumrechnungsdifferenzen.

### Segmentbeitrag

Der Segmentbeitrag der Segmente Produkt, Beratung, und Schulung berücksichtigt Aufwendungen, die den Segmenten direkt oder sinnvoll zurechenbar sind. Dazu gehören die

Umsatzkosten sowie die Vertriebs- und Marketingkosten. Den Segmenten nicht direkt oder nicht in sinnvoller Weise zurechenbare Aufwendungen wie Verwaltungs- und sonstige Aufwendungen sind im Segmentbeitrag nicht enthalten. Entwicklungsaufwand ist im Segmentbeitrag nicht berücksichtigt, da unsere Hauptentscheidungsträger den Segmentbeitrag unter Ausschluss des Entwicklungsaufwands messen.

Die Bewertung des Segmentbeitrags für das Segment Sybase unterscheidet sich von der jeweiligen Bewertung der anderen Segmente, da dieses Segment Entwicklungs-, Verwaltungs- und sonstige Aufwendungen umfasst, die im Beitrag der anderen Segmente nicht enthalten sind.

Die jedem Segment direkt zurechenbaren Abschreibungen sind im Segmentbeitrag eingerechnet.

Der in der Überleitungsrechnung oben aufgeführte Entwicklungsaufwand sowie die Verwaltungs- und sonstigen Aufwendungen basieren auf der Zuordnung im Managementberichtsweisen und entsprechen nicht den korrespondierenden Beträgen in der Konzern-Gewinn- und Verlustrechnung. Die Abweichungen gehen vornehmlich darauf zurück, dass die auf Sybase entfallenden Entwicklungsaufwendungen im Sybase-Segmentergebnis enthalten sind und das Managementberichtsweisen auf die Organisationsstrukturen und Kostenstellen und nicht etwa auf die Zuweisung der Kosten zu Funktionsbereichen abstellt.

### Segmentvermögen/-verbindlichkeiten

Der Vorstand als Hauptentscheidungsträger erhält keine Angaben zum Segmentvermögen und zu den Segmentverbindlichkeiten. Die Aufteilung des Geschäfts- oder Firmenwertes auf die Segmente zeigen wir in Textziffer (16).

### Geografische Angaben

In den nachstehenden Tabellen sind die Umsätze nach dem Sitz der Kunden sowie das langfristige Vermögen nach Regionen aufgeschlüsselt. Das langfristige Vermögen umfasst Geschäfts- oder Firmenwerte, immaterielle Vermögenswerte, Sachanlagen, aktivische Steuerpositionen und sonstige nicht finanzielle Vermögenswerte.

## Umsatzerlöse nach Sitz des Kunden

| Mio. €                            | 2010          | 2009          | 2008          |
|-----------------------------------|---------------|---------------|---------------|
| Deutschland                       | 2.195         | 2.029         | 2.193         |
| Übrige Region EMEA <sup>1)</sup>  | 4.068         | 3.614         | 4.013         |
| <b>Region EMEA</b>                | <b>6.263</b>  | <b>5.643</b>  | <b>6.206</b>  |
| USA                               | 3.243         | 2.695         | 2.890         |
| Übrige Region Amerika             | 1.192         | 925           | 990           |
| <b>Region Amerika</b>             | <b>4.435</b>  | <b>3.620</b>  | <b>3.880</b>  |
| Japan                             | 513           | 476           | 515           |
| Übrige Region Asien-Pazifik-Japan | 1.253         | 933           | 974           |
| <b>Region Asien-Pazifik-Japan</b> | <b>1.766</b>  | <b>1.409</b>  | <b>1.489</b>  |
| <b>SAP-Konzern</b>                | <b>12.464</b> | <b>10.672</b> | <b>11.575</b> |

<sup>1)</sup> Europa, Naher Osten, Afrika

## Software- und softwarebezogene Serviceerlöse nach Sitz des Kunden

| Mio. €                            | 2010         | 2009         | 2008         |
|-----------------------------------|--------------|--------------|--------------|
| Deutschland                       | 1.564        | 1.439        | 1.515        |
| Übrige Region EMEA <sup>1)</sup>  | 3.319        | 2.897        | 3.062        |
| <b>Region EMEA</b>                | <b>4.883</b> | <b>4.336</b> | <b>4.577</b> |
| USA                               | 2.497        | 2.018        | 1.983        |
| Übrige Region Amerika             | 930          | 700          | 748          |
| <b>Region Amerika</b>             | <b>3.427</b> | <b>2.718</b> | <b>2.731</b> |
| Japan                             | 448          | 404          | 410          |
| Übrige Region Asien-Pazifik-Japan | 1.036        | 740          | 748          |
| <b>Region Asien-Pazifik-Japan</b> | <b>1.484</b> | <b>1.144</b> | <b>1.158</b> |
| <b>SAP-Konzern</b>                | <b>9.794</b> | <b>8.198</b> | <b>8.466</b> |

<sup>1)</sup> Europa, Naher Osten, Afrika

## Softwareerlöse nach Sitz des Kunden

| Mio. €                     | 2010         | 2009         | 2008         |
|----------------------------|--------------|--------------|--------------|
| Region EMEA <sup>1)</sup>  | 1.471        | 1.304        | 1.844        |
| Region Amerika             | 1.247        | 855          | 1.184        |
| Region Asien-Pazifik-Japan | 547          | 449          | 578          |
| <b>SAP-Konzern</b>         | <b>3.265</b> | <b>2.607</b> | <b>3.606</b> |

<sup>1)</sup> Europa, Naher Osten, Afrika

## Langfristige Vermögenswerte

| Mio. €                            | 2010          | 2009         |
|-----------------------------------|---------------|--------------|
| Deutschland                       | 1.896         | 1.754        |
| Übrige Region EMEA <sup>1)</sup>  | 4.808         | 4.328        |
| <b>Region EMEA</b>                | <b>6.704</b>  | <b>6.082</b> |
| USA                               | 5.565         | 1.185        |
| Übrige Region Amerika             | 60            | 53           |
| <b>Region Amerika</b>             | <b>5.625</b>  | <b>1.238</b> |
| Japan                             | 4             | 4            |
| Übrige Region Asien-Pazifik-Japan | 117           | 88           |
| <b>Region Asien-Pazifik-Japan</b> | <b>121</b>    | <b>92</b>    |
| <b>SAP-Konzern</b>                | <b>12.450</b> | <b>7.412</b> |

<sup>1)</sup> Europa, Naher Osten, Afrika

Die Aufschlüsselung unserer Mitarbeiterzahl – umgerechnet in Vollzeitbeschäftigte – nach Regionen ist Textziffer (8) zu entnehmen.

---

## **(30) Organe**

### **Vorstand**

Mitgliedschaft in weiteren Aufsichtsräten und anderen vergleichbaren in- und ausländischen Kontrollgremien von nicht zum SAP-Konzern gehörenden Wirtschaftsunternehmen (Stand 31. Dezember 2010)

---

#### **Bill McDermott**

Vorstandssprecher (ab 7. Februar 2010)  
Strategie, Governance, strategische Unternehmensentwicklung, Innovation, Vertrieb, Field Services, Beratung, Aktivitäten des Kunden- und Partnernetzes, Kommunikation, Marketing

Board of Directors der ANSYS, Inc., Canonsburg, Pennsylvania, USA  
Board of Directors der Under Armour, Inc., Baltimore, Maryland, USA  
Board of Directors der PAETEC Communications, Inc., New York, New York, USA

---

#### **Jim Hagemann Snabe**

Vorstandssprecher (ab 7. Februar 2010)  
Strategie, Governance, strategische Unternehmensentwicklung, Innovation, Portfoliostrategie, Kommunikation, Marketing

Board of Directors der Linkage A/S, Kopenhagen, Dänemark  
Board of Directors der Thrane & Thrane A/S, Lyngby, Dänemark  
Aufsichtsrat der Crossgate AG, München (bis 31. Juli 2010)

---

#### **Dr. Werner Brandt**

Finanzvorstand  
Finanzen und Administration einschließlich Investor Relations und Datenschutz

Aufsichtsrat der Deutsche Lufthansa AG, Frankfurt am Main  
Aufsichtsrat der QIAGEN N.V., Venlo, Niederlande  
Aufsichtsrat der Heidelberger Druckmaschinen AG, Heidelberg

#### **Dr. Angelika Dammann (ab 1. Juli 2010)**

Personalvorstand  
Arbeitsdirektorin  
Globales Personalwesen

Aufsichtsrat der ESMT European School of Management and Technology GmbH, Berlin (ab 15. Dezember 2010)

---

#### **Gerhard Oswald**

Chief Operating Officer  
SAP Active Global Support, Global IT, Globalization Services, Quality, Governance & Production, Operations, SAP Labs Network

---

#### **Vishal Sikka (ab 7. Februar 2010)**

Innovationen, Technologie und Architektur, Forschung (Global SAP Research)

### ***Im Geschäftsjahr ausgeschiedene Mitglieder***

#### **Erwin Gunst (bis 31. Januar 2010)**

#### **Léo Apotheker (bis 7. Februar 2010)**

#### **John Schwarz (bis 11. Februar 2010)**



---

### **Aufsichtsrat**

Mitgliedschaft in weiteren Aufsichtsräten und anderen vergleichbaren in- und ausländischen Kontrollgremien von nicht zum SAP-Konzern gehörenden Wirtschaftsunternehmen (Stand 31. Dezember 2010)

---

**Prof. Dr. h. c. mult. Hasso Plattner** <sup>(2), (4), (5), (7), (8), (9)</sup>  
Vorsitzender

---

**Lars Lamadé** <sup>(1), (4), (7), (9)</sup>  
Stellvertretender Vorsitzender  
Project Manager Service & Support

---

**Pekka Ala-Pietilä** <sup>(5), (8), (9)</sup>  
Mitbegründer und CEO der Blyk Ltd. London, Großbritannien

Board of Directors der Pöyry Plc, Vantaa, Finnland  
Board of Directors der CVON Group Limited, London, Großbritannien  
Board of Directors der CVON Limited, London, Großbritannien  
Board of Directors der CVON Innovations Limited, London, Großbritannien  
Board of Directors der Blyk Services Oy, Helsinki, Finnland  
Board of Directors der CVON Innovation Services Oy, Turku, Finnland  
Board of Directors der CVON Future Limited, London, Großbritannien  
Board of Directors der HelloSoft Inc., San José, Kalifornien, USA  
Board of Directors der Blyk (NL) Ltd., London, Großbritannien  
Board of Directors der Blyk (DE) Ltd., London, Großbritannien  
Board of Directors der Blyk (ES) Ltd., London, Großbritannien  
Board of Directors der Blyk (BE) Ltd., London, Großbritannien  
Board of Directors der Blyk.nl NV, Amsterdam, Niederlande  
Board of Directors der Blyk.be SA, Hoeilaart, Belgien  
Board of Directors der Blyk International Ltd., London, Großbritannien

---

**Thomas Bamberger** <sup>(1), (3)</sup>  
Chief Operating Officer Operations

**Panagiotis Bissiritsas** <sup>(1), (2), (6)</sup>  
Support-Experte

---

**Willi Burbach** <sup>(1), (5), (7)</sup>  
Entwickler

---

**Prof. Dr. Wilhelm Haarmann** <sup>(2), (6), (7), (9)</sup>  
Rechtsanwalt, Wirtschaftsprüfer, Steuerberater  
Senior Partner bei HAARMANN Partnerschaftsgesellschaft, Rechtsanwälte, Steuerberater, Wirtschaftsprüfer, Frankfurt am Main

Aufsichtsrat der Vodafone Holding GmbH, Düsseldorf  
(bis 16. Dezember 2010)

---

**Peter Koop** <sup>(1), (5), (7)</sup>  
Industry Business Development Expert

---

**Christiane Kuntz-Mayr** <sup>(1), (5)</sup>  
Stellvertretende Vorsitzende des Betriebsrats der SAP AG

---

**Bernard Liautaud** <sup>(5)</sup>  
General Partner der Balderton Capital, London, Großbritannien

Board of Directors der Clinical Solutions Holdings Ltd., Basingstoke, Hampshire, Großbritannien  
Board of Directors der nlyte Software Ltd., London, Großbritannien  
Board of Directors der Talend SA, Suresnes, Frankreich  
Board of Directors der Cap Gemini, Paris, Frankreich  
Board of Directors der Quickbridge (UK) Ltd., London, Großbritannien  
Board of Directors der SCYTL Secure Electronic Voting SA, Barcelona Spanien (ab 30. Juni 2010)  
Board of Directors der Abiquo Group Inc., Redwood City, Kalifornien, USA (ab 23. November 2010)

---

**Dr. Gerhard Maier** <sup>(1), (2), (3)</sup>  
Development Project Manager

---

**Dr. h. c. Hartmut Mehdorn** <sup>(4), (6)</sup>  
Selbständiger Berater

Board of Directors der Air Berlin PLC, Rickmansworth,  
Großbritannien  
Mitglied des Beirats der Fiege-Gruppe, Greven

---

**Prof. Dr.-Ing. Dr. h. c. Dr.-Ing. E. h. Joachim Milberg** <sup>(2), (3), (5), (7), (8)</sup>  
Vorsitzender des Aufsichtsrats der BMW AG, München

Aufsichtsrat der Bertelsmann AG, Gütersloh  
Aufsichtsrat der Festo AG, Esslingen  
Board of Directors der Deere & Company, Moline, Illinois, USA  
Aufsichtsrat der ZF Friedrichshafen AG, Friedrichshafen

---

**Dr. Erhard Schipporeit** <sup>(3), (9)</sup>  
Unternehmensberater

Aufsichtsrat der Talanx AG, Hannover  
Aufsichtsrat der Deutsche Börse AG, Frankfurt am Main  
Aufsichtsrat der HDI V.a.G., Hannover  
Aufsichtsrat der Hannover Rückversicherung AG, Hannover  
Board of Directors der TUI Travel PLC, London, Großbritannien  
Aufsichtsrat der Fuchs Petrolub AG, Mannheim  
Board of Directors der Fidelity Advisor World Funds, Bermuda  
(bis 30. September 2010)  
Board of Directors der Fidelity Funds SICAV, Luxemburg

**Stefan Schulz** <sup>(1), (4), (5), (6), (9)</sup>  
Development Project Manager

---

**Prof. Dr.-Ing. Dr.-Ing. E. h. Klaus Wucherer** <sup>(5)</sup>  
Geschäftsführer der Dr. Klaus Wucherer Innovations-  
und Technologieberatung GmbH, Erlangen

Aufsichtsrat der Heitech AG, Erlangen (ab 9. August 2010)  
Aufsichtsrat der Dürr AG, Bietigheim-Bissingen  
Aufsichtsrat der Infineon Technologies AG, München  
Aufsichtsrat der LEONI AG, Nürnberg

Die Angaben gelten per 31. Dezember 2010.

- <sup>(1)</sup> Arbeitnehmervertreter
- <sup>(2)</sup> Mitglied des Personalausschusses
- <sup>(3)</sup> Mitglied des Prüfungsausschusses
- <sup>(4)</sup> Mitglied des Ausschusses gemäß § 27 Abs. 3 MitbestG
- <sup>(5)</sup> Mitglied des Technologie- und Strategieausschusses
- <sup>(6)</sup> Mitglied des Finanz- und Investitionsausschusses
- <sup>(7)</sup> Mitglied des Präsidialausschusses
- <sup>(8)</sup> Mitglied des Nominierungsausschusses
- <sup>(9)</sup> Mitglied des Sonderausschusses

Die Gesamtvergütung der Vorstandsmitglieder in den Geschäftsjahren 2010, 2009 und 2008 betrug:

#### Vorstandsvergütung

| Tsd. €                                                      | 2010            | 2009            | 2008            |
|-------------------------------------------------------------|-----------------|-----------------|-----------------|
| Kurzfristig fällige Leistungen                              | 13.254,4        | 30.470,4        | 20.605,4        |
| Aktienbasierte Vergütungen                                  | 3.919,5         | 4.412,0         | 4.467,2         |
| <b>Zwischensumme</b>                                        | <b>17.173,9</b> | <b>34.882,4</b> | <b>25.072,6</b> |
| Für Leistungen nach Beendigung des Anstellungsverhältnisses | 1.999,0         | 1.479,0         | 998,8           |
| – davon leistungsorientiert                                 | 797,0           | 1.171,0         | 432,2           |
| – davon beitragsorientiert                                  | 1.202,0         | 308,0           | 566,6           |
| Abfindungen                                                 | 10.947,5        | 2.326,8         | 4.763,5         |
| Andere langfristig fällige Leistungen                       | 3.407,0         | 0,0             | 0,0             |
| <b>Summe</b>                                                | <b>33.527,4</b> | <b>38.688,2</b> | <b>30.834,9</b> |

Die aktienbasierte Vergütung in obiger Tabelle entspricht dem beizulegenden Zeitwert am Tag der Gewährung der virtuellen Aktienoptionen, die im Geschäftsjahr an Vorstandsmitglieder ausgegeben wurden.

#### Aktienbasierte Vergütung

|                                 | 2010    | 2009    | 2008    |
|---------------------------------|---------|---------|---------|
| Anzahl gewährter Aktienoptionen | 559.926 | 785.060 | 628.329 |
| Gesamtaufwand (in Tsd. €)       | 2.987,5 | 2.830,0 | 848,6   |

Die aktienbasierte Vergütung in obiger Tabelle entspricht dem nach IFRS 2 ermittelten Aufwand der jeweiligen Berichtsperiode.

Die dynamische Pensionsverpflichtung (Projected Benefit Obligation, PBO) für die Mitglieder des Vorstands sowie ihr jährlicher Pensionsanspruch bei Erreichen des 60. Lebensjahres auf der Grundlage der Ansprüche aus leistungsorientierten und gehaltsbezogenen Plänen stellen sich wie folgt dar:

#### Altersversorgung

| Tsd. €                    | 2010    | 2009    | 2008    |
|---------------------------|---------|---------|---------|
| PBO per 31.12.2010        | 7.326,9 | 6.529,9 | 5.584,9 |
| Jährlicher Rentenanspruch | 466,2   | 466,6   | 449,3   |

Der Aufsichtsrat wird vorbehaltlich der Beschlussfassung der Hauptversammlung am 25. Mai 2011 folgende Gesamtjahresbezüge erhalten:

#### Aufsichtsratsvergütung

| Tsd. €                     | 2010    | 2009    | 2008    |
|----------------------------|---------|---------|---------|
| Gesamtvergütung            | 2.875,0 | 1.842,1 | 1.840,0 |
| – davon feste Vergütung    | 870,0   | 650,0   | 646,9   |
| – davon Ausschussvergütung | 325,0   | 92,1    | 98,3    |
| – davon variable Vergütung | 1.680,0 | 1.100,0 | 1.094,8 |

Die Mitglieder des Aufsichtsrats erhalten für ihre Aufsichtsrats-tätigkeit keine aktienbasierten Vergütungen. Sofern Arbeitnehmervertreter im Aufsichtsrat aktienbasierte Vergütungen erhalten, resultieren diese Leistungen aus ihrer Stellung als Arbeitnehmer der SAP AG und sind von ihrer Aufsichtsrats-tätigkeit unabhängig.

Im Geschäftsjahr 2010 erfolgten Pensionszahlungen an ausgeschiedene Vorstandsmitglieder in folgender Höhe:

#### Zahlungen an ausgeschiedene Vorstandsmitglieder

| Tsd. €            | 2010     | 2009     | 2008     |
|-------------------|----------|----------|----------|
| Pensionszahlungen | 1.290,0  | 764,0    | 763,0    |
| PBO               | 24.878,0 | 15.777,0 | 11.367,0 |

In den Geschäftsjahren 2010, 2009 und 2008 gewährten wir an Organmitglieder keine Vorschüsse auf künftige Gehaltszahlungen oder Kredite. Wir gingen zugunsten dieser Personen auch keine Haftungsverhältnisse ein.

Am 31. Dezember 2010 entfiel auf die Mitglieder des SAP-Vorstands folgender Aktienbesitz:

#### Aktienbesitz

|              | 2010        | 2009        | 2008        |
|--------------|-------------|-------------|-------------|
| Vorstand     | 13.747      | 15.336      | 88.527      |
| Aufsichtsrat | 122.156.130 | 127.193.136 | 128.995.306 |

Detaillierte Informationen zu den Vergütungsbestandteilen sowie zum Aktienbesitz des Vorstands und des Aufsichtsrats legt die SAP in ihrem Vergütungsbericht offen. Der Vergütungsbericht ist Bestandteil des Konzernlageberichts und des Jahresberichts Form 20-F und kann auf der Internetseite der SAP abgerufen werden.

#### (31) Transaktionen mit nahestehenden Unternehmen und Personen

Einige Mitglieder des Vorstands sowie des Aufsichtsrats der SAP AG sind oder waren in verantwortungsvollen und einflussreichen Positionen in anderen Unternehmen tätig (siehe Textziffer (30)), zu denen wir gewöhnliche Geschäftsbeziehungen unterhalten. Der Verkauf und Kauf von Software und Dienstleistungen erfolgt dabei zu Konditionen wie mit fremden Dritten.

Nach seinem Wechsel vom Vorstand in den Aufsichtsrat der SAP AG im Mai 2003 schloss Hasso Plattner einen Beratungsvertrag mit der SAP ab. Der Beratungsvertrag sieht keine Vergütung vor. Uns entstehen aus diesem Beratungsvertrag lediglich Aufwendungen aus der Erstattung der angefallenen Spesen, die in allen berichteten Geschäftsjahren unwesentlich waren.

Hasso Plattner ist alleiniger Gesellschafter der H.P. Beteiligungs GmbH, die wiederum 90 % an der Bramasol Inc., Palo Alto, Kalifornien, USA hält. Mit dem SAP-Partner Bramasol erwirtschafteten wir in allen dargestellten Berichtsperioden unwesentliche Umsätze. Die Entgelte für die Leistungen von Bramasol waren in allen berichteten Geschäftsjahren ebenfalls unwesentlich.

Wilhelm Haarmann praktiziert in der HAARMANN Partnerschaftsgesellschaft in Frankfurt. Die Entgelte für die Leistungen der HAARMANN Partnerschaftsgesellschaft waren in allen berichteten Geschäftsjahren unwesentlich.

Das Aufsichtsratsmitglied Hartmut Mehdorn beriet die SAP im Rahmen einer Produktstudie. Der hierfür im Geschäftsjahr 2010 in Rechnung gestellte Betrag war für die SAP unwesentlich.

Geschäftsbeziehungen mit assoziierten Unternehmen erfolgen zu Konditionen wie mit fremden Dritten. Mit dem assoziierten Unternehmen Crossgate AG schloss SAP darüber hinaus im Geschäftsjahr 2010 einen Darlehensvertrag in Höhe von 6 Mio. € ab. Im Rahmen dieses Vertrags wurden bis zum Geschäftsjahresende 3,5 Mio. € an die Crossgate AG gezahlt.

#### (32) Honorare und Dienstleistungen des Abschlussprüfers

Die Aktionäre der SAP AG haben in der Hauptversammlung am 8. Juni 2010 die KPMG AG Wirtschaftsprüfungsgesellschaft (KPMG) zum Abschlussprüfer und Konzernabschlussprüfer der SAP AG für das Geschäftsjahr 2010 gewählt. Für im Jahr 2010 und in den Jahren davor erbrachte Prüfungsleistungen und weitere Leistungen der KPMG AG Wirtschaftsprüfungsgesellschaft und anderer Gesellschaften des weltweiten KPMG-Verbundes sind im SAP-Konzern folgende Honorare angefallen:

#### Honorare und Dienstleistungen des Abschlussprüfers

| Mio. €                                 | 2010       | 2009       | 2008        |
|----------------------------------------|------------|------------|-------------|
| Prüfungshonorare                       | 9,4        | 8,0        | 8,4         |
| Honorare für prüfungsnahe Leistungen   | 0,3        | 0,3        | 0,6         |
| Honorare für Steuerberatungsleistungen | 0,1        | 0,1        | 0,6         |
| Honorare für sonstige Leistungen       | 0,1        | 0,0        | 0,7         |
|                                        | <b>9,9</b> | <b>8,4</b> | <b>10,3</b> |

Die Prüfungshonorare umfassen die Honorare, die von der KPMG für die Prüfung des Konzernabschlusses und der Jahresabschlüsse der SAP AG und ihrer Tochterunternehmen in Rechnung gestellt wurden. Prüfungsnahe Leistungen der KPMG umfassen Bilanzierungshinweise zu durchgeführten und geplanten Transaktionen und andere Nichtprüfungsleistungen, die in engem Zusammenhang mit der Abschlussprüfung stehen. Steuerberatungsleistungen umfassen die Unterstützung bei der Erstellung von Steuererklärungen sowie Steuerberatung im Zusammenhang mit Verrechnungspreisen, Konzernumstrukturierungen und anderen durchgeführten und geplanten Geschäftsvorfällen. Die sonstigen Leistungen umfassen unter anderem Dienstleistungen, wie zum Beispiel Schulungs- und Beratungsleistungen zu Themen, die außerhalb der Rechnungslegung und des Steuerwesens liegen.

Für Leistungen der KPMG AG Wirtschaftsprüfungsgesellschaft sowie mit ihr verbundenen Unternehmen haben wir folgende Aufwendungen erfasst:

#### Honorare und Dienstleistungen der KPMG AG und mit ihr verbundenen Unternehmen

| Mio. €                                 | 2010       | 2009       | 2008       |
|----------------------------------------|------------|------------|------------|
| Prüfungshonorare                       | 3,3        | 2,8        | 3,3        |
| Honorare für prüfungsnahe Leistungen   | 0,3        | 0,2        | 0,4        |
| Honorare für Steuerberatungsleistungen | 0,1        | 0,1        | 0,2        |
| Honorare für sonstige Leistungen       | 0,1        | 0,0        | 0,1        |
|                                        | <b>3,8</b> | <b>3,1</b> | <b>4,1</b> |

#### (33) Deutscher Corporate Governance Kodex

Im Februar 2002 veröffentlichte die deutsche Bundesregierung den Deutschen Corporate Governance Kodex, der neben gesetzlichen Vorschriften eine Reihe von Empfehlungen und Anregungen enthält. Allein die Vorschriften sind von deutschen Unternehmen zwingend anzuwenden. Hinsichtlich der Empfehlungen sieht das deutsche Aktiengesetz (§ 161) lediglich vor, dass börsennotierte Unternehmen jährlich eine Erklärung zu ihrer Beachtung veröffentlichen müssen. Von Anregungen können die Unternehmen ohne Erklärungs-pflicht abweichen.

In den Jahren 2010 und 2009 haben der Vorstand und der Aufsichtsrat der SAP AG die erforderlichen Entsprechenserklärungen abgegeben. Die Erklärungen können auf unserer Internetseite abgerufen werden: [www.sap.com/germany/about/governance/statutes/](http://www.sap.com/germany/about/governance/statutes/)

#### (34) Ereignisse nach dem Bilanzstichtag

Nach dem 31. Dezember 2010 ergaben sich folgende Änderungen:

Im Februar 2011 erwarben wir Software für das Sicherheits-, Identitäts- und Zugriffsmanagement sowie dazugehörige Vermögenswerte von SECUDE AG (Schweiz), einem führenden Anbieter von Lösungen für Anwendungssicherheit. Hierbei handelt es sich nicht um eine wesentliche Akquisition für SAP.

Für weitere Informationen zu dieser Akquisition verweisen wir auf das Kapitel Akquisitionen im Lagebericht.

Am 28. Februar 2011 haben wir 500 Mio. € des Akquisitionsdarlehens getilgt. Der am 31. Dezember 2010 ausstehende Saldo dieses Akquisitionsdarlehens von 1 Mrd. € ist gemäß Vertrag im Mai 2012 fällig (siehe Textziffer (18b)). Durch die vorzeitige Rückzahlung werden sich im Jahr 2011 unsere Zinsaufwendungen als Komponente des Finanzergebnis, netto um einen einstelligen Millionenbetrag reduzieren.

## (35) Anteilsbesitz

Stand 31. Dezember 2010

| Name und Sitz der Gesellschaft                                                        | Anteil am Kapital | Umsatz der Gesellschaft im Jahr 2010 <sup>1)</sup> | Gewinn/Verlust nach Steuern (–) 2010 <sup>1)</sup> | Eigenkapital der Gesellschaft 31.12.2010 <sup>1)</sup> | Anzahl Mitarbeiter am 31.12.2010 <sup>2)</sup> |
|---------------------------------------------------------------------------------------|-------------------|----------------------------------------------------|----------------------------------------------------|--------------------------------------------------------|------------------------------------------------|
|                                                                                       | %                 | Tsd. €                                             | Tsd. €                                             | Tsd. €                                                 |                                                |
| <b>I. Verbundene Unternehmen</b>                                                      |                   |                                                    |                                                    |                                                        |                                                |
| <b>INLAND</b>                                                                         |                   |                                                    |                                                    |                                                        |                                                |
| OutlookSoft Deutschland GmbH, Walldorf <sup>4)</sup>                                  | 100,0             | 0                                                  | 18                                                 | 0                                                      | 0                                              |
| SAF Germany GmbH, Konstanz <sup>4)</sup>                                              | 70,9              | 1.007                                              | 50                                                 | 360                                                    | 0                                              |
| SAP Beteiligungs GmbH, Walldorf                                                       | 100,0             | 3                                                  | 2                                                  | 46                                                     | 0                                              |
| SAP Deutschland AG & Co. KG, Walldorf <sup>9)</sup>                                   | 100,0             | 2.597.168                                          | 607.039                                            | 1.257.501                                              | 4.596                                          |
| SAP Dritte Beteiligungs- und Vermögensverwaltung GmbH, Walldorf <sup>4), 5), 9)</sup> | 100,0             | 0                                                  | –35.114                                            | 491.956                                                | 0                                              |
| SAP Erste Beteiligungs- und Vermögensverwaltung GmbH, Walldorf <sup>5), 9)</sup>      | 100,0             | 0                                                  | 23.141                                             | 827.703                                                | 0                                              |
| SAP Foreign Holdings GmbH, Walldorf                                                   | 100,0             | 0                                                  | 32                                                 | 159                                                    | 0                                              |
| SAP Fünfte Beteiligungs- und Vermögensverwaltung GmbH, Walldorf <sup>3), 4), 9)</sup> | 100,0             | 0                                                  | 0                                                  | 2.244.919                                              | 0                                              |
| SAP Hosting Beteiligungs GmbH, St. Leon-Rot                                           | 100,0             | 0                                                  | 0                                                  | 26                                                     | 0                                              |
| SAP Portals Europe GmbH, Walldorf <sup>4)</sup>                                       | 100,0             | 0                                                  | 236                                                | 123.471                                                | 0                                              |
| SAP Portals Holding Beteiligungs GmbH, Walldorf <sup>4)</sup>                         | 100,0             | 0                                                  | –29                                                | 928.967                                                | 0                                              |
| SAP Projektverwaltungs- und Beteiligungs GmbH, Walldorf <sup>4), 5), 9)</sup>         | 100,0             | 0                                                  | –37.525                                            | 291.654                                                | 0                                              |
| SAP Puerto Rico GmbH, Walldorf <sup>7)</sup>                                          | 100,0             | 22.802                                             | 155                                                | 872                                                    | 32                                             |
| SAP Retail Solutions Beteiligungsgesellschaft mbH, Walldorf                           | 100,0             | 0                                                  | 179                                                | 14.090                                                 | 0                                              |
| SAP Vierte Beteiligungs- und Vermögensverwaltung GmbH, Walldorf                       | 100,0             | 0                                                  | 0                                                  | 25                                                     | 0                                              |
| SAP Zweite Beteiligungs- und Vermögensverwaltung GmbH, Walldorf <sup>5), 9)</sup>     | 100,0             | 0                                                  | 87.373                                             | 90.944                                                 | 0                                              |
| Steeb Anwendungssysteme GmbH, Abstatt <sup>9)</sup>                                   | 100,0             | 61.068                                             | 2.022                                              | 14.009                                                 | 191                                            |
| Sybase Germany GmbH, Düsseldorf <sup>3), 4), 8)</sup>                                 | 100,0             | 15.945                                             | 474                                                | –2.975                                                 | 161                                            |
| TechniData BCS GmbH, Siegen <sup>3), 4)</sup>                                         | 100,0             | 4.726                                              | –378                                               | 744                                                    | 33                                             |
| TechniData GmbH, Markdorf <sup>3)</sup>                                               | 100,0             | 48.579                                             | 7.013                                              | 83.615                                                 | 285                                            |
| Wicomunications GmbH, München <sup>4)</sup>                                           | 100,0             | 0                                                  | 0                                                  | 49                                                     | 0                                              |
| <b>EUROPA (OHNE INLAND)/NAHER OSTEN/AFRIKA</b>                                        |                   |                                                    |                                                    |                                                        |                                                |
| Ambin Properties (Proprietary) Limited, Johannesburg, Südafrika <sup>4)</sup>         | 100,0             | 0                                                  | –60                                                | –562                                                   | 0                                              |
| Armstrong Laing (North America) Limited, London, Großbritannien <sup>4)</sup>         | 100,0             | 0                                                  | 0                                                  | 1                                                      | 0                                              |
| Armstrong Laing Limited, London, Großbritannien <sup>4)</sup>                         | 100,0             | 0                                                  | –2                                                 | 2.975                                                  | 0                                              |
| Blue-Edge Software Limited, London, Großbritannien <sup>4)</sup>                      | 100,0             | 0                                                  | 0                                                  | 0                                                      | 0                                              |
| Business Objects (UK) Limited, London, Großbritannien <sup>4)</sup>                   | 100,0             | 0                                                  | 461                                                | 32.026                                                 | 0                                              |
| Business Objects Holding B.V., s-Hertogenbosch, Niederlande <sup>4)</sup>             | 100,0             | 0                                                  | 51                                                 | 36.024                                                 | 0                                              |
| Business Objects Software Limited, Dublin, Irland <sup>4)</sup>                       | 100,0             | 683.339                                            | 156.511                                            | 2.779.237                                              | 195                                            |
| Cartesis UK Limited, London, Großbritannien <sup>4)</sup>                             | 100,0             | 0                                                  | 1                                                  | 1.116                                                  | 0                                              |
| Chemical Exchange Directory S.A., Collonge-Bellerive, Schweiz <sup>3), 4)</sup>       | 100,0             | 841                                                | 216                                                | 1.600                                                  | 1                                              |
| Christie Partners Holding CV, Rotterdam, Niederlande <sup>3), 4), 8)</sup>            | 100,0             | 0                                                  | 15                                                 | –21.823                                                | 0                                              |
| Crystal Decisions (Ireland) Limited, Dublin, Irland <sup>4)</sup>                     | 100,0             | 0                                                  | 205                                                | 44.612                                                 | 0                                              |
| Crystal Decisions France S.A.S., Levallois-Perret, Frankreich <sup>4)</sup>           | 100,0             | 0                                                  | 52                                                 | 7.863                                                  | 0                                              |

Stand 31. Dezember 2010

| Name und Sitz der Gesellschaft                                                                             | Anteil am Kapital | Umsatz der Gesellschaft im Jahr 2010 <sup>1)</sup> | Gewinn/Verlust nach Steuern (–) 2010 <sup>1)</sup> | Eigenkapital der Gesellschaft 31.12.2010 <sup>1)</sup> | Anzahl Mitarbeiter am 31.12.2010 <sup>2)</sup> |
|------------------------------------------------------------------------------------------------------------|-------------------|----------------------------------------------------|----------------------------------------------------|--------------------------------------------------------|------------------------------------------------|
|                                                                                                            | %                 | Tsd. €                                             | Tsd. €                                             | Tsd. €                                                 |                                                |
| Crystal Decisions Holdings Limited, Dublin, Irland <sup>4)</sup>                                           | 100,0             | 0                                                  | 61                                                 | 77.556                                                 | 0                                              |
| Crystal Decisions UK Limited, London, Großbritannien <sup>4)</sup>                                         | 100,0             | 0                                                  | 1.469                                              | 2.125                                                  | 0                                              |
| Edgewing Limited, London, Großbritannien <sup>4)</sup>                                                     | 100,0             | 0                                                  | 354                                                | –17                                                    | 0                                              |
| Inxight Software UK Limited, London, Großbritannien <sup>4)</sup>                                          | 100,0             | 0                                                  | 0                                                  | 143                                                    | 0                                              |
| Joe D Partners CV, Utrecht, Niederlande <sup>3), 4), 8)</sup>                                              | 100,0             | 0                                                  | 18.112                                             | 707.768                                                | 0                                              |
| Limited Liability Company SAP CIS, Moskau, Russland                                                        | 100,0             | 278.497                                            | 29.068                                             | 129.782                                                | 504                                            |
| Limited Liability Company SAP Kazakhstan, Almaty, Kasachstan                                               | 100,0             | 12.267                                             | 103                                                | 1.295                                                  | 11                                             |
| Limited Liability Company SAP Ukraine, Kiew, Ukraine                                                       | 100,0             | 13.323                                             | –448                                               | –1.559                                                 | 103                                            |
| Merlin Systems Oy, Espoo, Finnland <sup>4)</sup>                                                           | 100,0             | 7.929                                              | 472                                                | 1.873                                                  | 28                                             |
| Millsgate Holding B.V., Amsterdam, Niederlande <sup>4)</sup>                                               | 100,0             | –                                                  | –                                                  | –                                                      | –                                              |
| S.A.P. Nederland B.V., s-Hertogenbosch, Niederlande                                                        | 100,0             | 339.452                                            | 45.941                                             | 332.880                                                | 399                                            |
| SAF Simulation, Analysis and Forecasting AG, Tägerwil, Schweiz                                             | 70,9              | 14.610                                             | 752                                                | 34.788                                                 | 61                                             |
| SAF Simulation, Analysis and Forecasting Slovakia s.r.o., Bratislava, Slowakei <sup>4)</sup>               | 70,9              | 1.242                                              | –88                                                | 170                                                    | 20                                             |
| SAP – NOVABASE, A.C.E., Porto Salvo, Portugal <sup>3), 4)</sup>                                            | 66,7              | –                                                  | –                                                  | –                                                      | –                                              |
| SAP (Schweiz) AG, Biel, Schweiz                                                                            | 100,0             | 485.957                                            | 21.245                                             | 65.347                                                 | 541                                            |
| SAP (UK) Limited, Feltham, Großbritannien                                                                  | 100,0             | 612.522                                            | 63.944                                             | 94.265                                                 | 1.044                                          |
| SAP Belgium – Systems Applications and Products NV/SA, Brüssel, Belgien <sup>4)</sup>                      | 100,0             | 166.008                                            | 12.833                                             | 98.102                                                 | 256                                            |
| SAP BULGARIA EOOD, Sofia, Bulgarien <sup>4)</sup>                                                          | 100,0             | 2.549                                              | –184                                               | 795                                                    | 10                                             |
| SAP Business Services Center Europe, s.r.o., Prag, Tschechische Republik                                   | 100,0             | 22.185                                             | 602                                                | 6.475                                                  | 284                                            |
| SAP Commercial Services Ltd., Valetta, Malta                                                               | 100,0             | 0                                                  | –5                                                 | –10                                                    | 0                                              |
| SAP ČR, spol. s r.o., Prag, Tschechische Republik                                                          | 100,0             | 85.687                                             | 10.447                                             | 27.726                                                 | 225                                            |
| SAP CYPRUS Ltd, Nicosia, Zypern <sup>4)</sup>                                                              | 100,0             | 3.252                                              | –3                                                 | –1.824                                                 | 2                                              |
| SAP d.o.o., Zagreb, Kroatien                                                                               | 100,0             | 6.807                                              | –983                                               | –431                                                   | 17                                             |
| SAP Danmark A/S, Kopenhagen, Dänemark                                                                      | 100,0             | 142.267                                            | 17.286                                             | 29.753                                                 | 154                                            |
| SAP Egypt LLC, Kairo, Ägypten <sup>3), 4)</sup>                                                            | 100,0             | 0                                                  | 0                                                  | 9                                                      | 0                                              |
| SAP EMEA Inside Sales S.L., Barcelona, Spanien                                                             | 100,0             | 14.593                                             | 444                                                | 1.646                                                  | 135                                            |
| SAP España – Sistemas, Aplicaciones y Productos en la Informática, S.A., Madrid, Spanien <sup>4)</sup>     | 100,0             | 224.089                                            | 27.335                                             | 177.793                                                | 359                                            |
| SAP Estonia OÜ, Tallinn, Estland                                                                           | 100,0             | 1.320                                              | 16                                                 | 16                                                     | 1                                              |
| SAP Finland Oy, Espoo, Finnland                                                                            | 100,0             | 96.985                                             | 11.022                                             | 65.135                                                 | 109                                            |
| SAP France Holding, Paris, Frankreich                                                                      | 100,0             | 606                                                | 91.943                                             | 4.879.572                                              | 4                                              |
| SAP France, Paris, Frankreich                                                                              | 100,0             | 716.143                                            | 67.047                                             | 1.584.792                                              | 1.432                                          |
| SAP HELLAS SYSTEMS APPLICATIONS AND DATA PROCESSING S.A, Athen, Griechenland                               | 100,0             | 32.782                                             | 1.907                                              | 7.451                                                  | 54                                             |
| SAP Hungary Rendszerek, Alkalmazások és Termékek az Adatfeldolgozásban Informatikai Kft., Budapest, Ungarn | 100,0             | 45.533                                             | 229                                                | 17.616                                                 | 367                                            |
| SAP Ireland Limited, Dublin, Irland                                                                        | 100,0             | 3.781                                              | 777                                                | –1.181                                                 | 0                                              |
| SAP Ireland US-Financials Services Ltd., Dublin, Irland <sup>3), 4)</sup>                                  | 100,0             | 0                                                  | 67.288                                             | 2.284.278                                              | 3                                              |
| SAP Israel Ltd., Ra'anana, Israel                                                                          | 100,0             | 15.842                                             | 196                                                | –3.536                                                 | 75                                             |
| SAP Italia Sistemi Applicazioni Prodotti in Data Processing S.p.A., Mailand, Italien <sup>4)</sup>         | 100,0             | 306.418                                            | 22.256                                             | 242.814                                                | 508                                            |
| SAP Labs Bulgaria EOOD, Sofia, Bulgarien                                                                   | 100,0             | 19.607                                             | 845                                                | 4.417                                                  | 439                                            |

Stand 31. Dezember 2010

| Name und Sitz der Gesellschaft                                                                                 | Anteil am Kapital | Umsatz der Gesellschaft im Jahr 2010 <sup>1)</sup> | Gewinn/Verlust nach Steuern (–) 2010 <sup>1)</sup> | Eigenkapital der Gesellschaft 31.12.2010 <sup>1)</sup> | Anzahl Mitarbeiter am 31.12.2010 <sup>2)</sup> |
|----------------------------------------------------------------------------------------------------------------|-------------------|----------------------------------------------------|----------------------------------------------------|--------------------------------------------------------|------------------------------------------------|
|                                                                                                                | %                 | Tsd. €                                             | Tsd. €                                             | Tsd. €                                                 |                                                |
| SAP Labs Finland Oy, Espoo, Finnland <sup>4),8)</sup>                                                          | 100,0             | 7.188                                              | 421                                                | 45.775                                                 | 48                                             |
| SAP LABS France S.A.S., Mougins, Frankreich                                                                    | 100,0             | 39.206                                             | 9.041                                              | 22.113                                                 | 264                                            |
| SAP Labs Israel Ltd., Ra'anana, Israel                                                                         | 100,0             | 42.020                                             | 2.076                                              | 12.404                                                 | 304                                            |
| SAP Latvia SIA, Riga, Lettland                                                                                 | 100,0             | 1.452                                              | 138                                                | –508                                                   | 2                                              |
| SAP Malta Investments Ltd., Valetta, Malta                                                                     | 100,0             | 0                                                  | –5                                                 | –10                                                    | 0                                              |
| SAP Middle East and North Africa L.L.C., Dubai, Vereinigte Arabische Emirate <sup>7)</sup>                     | 49,0              | 65.203                                             | –19.775                                            | 19.994                                                 | 162                                            |
| SAP Nederland Holding B.V., s-Hertogenbosch, Niederlande                                                       | 100,0             | 0                                                  | 994                                                | 518.981                                                | 0                                              |
| SAP Norge AS, Lysaker, Norwegen                                                                                | 100,0             | 61.484                                             | –4.137                                             | 23.571                                                 | 86                                             |
| SAP Österreich GmbH, Wien, Österreich                                                                          | 100,0             | 159.844                                            | 18.961                                             | 24.015                                                 | 348                                            |
| SAP Polska Sp. z o.o., Warschau, Polen                                                                         | 100,0             | 61.850                                             | 6.101                                              | 29.156                                                 | 122                                            |
| SAP Portals Israel Ltd., Ra'anana, Israel <sup>4)</sup>                                                        | 100,0             | 53.699                                             | 14.299                                             | 84.152                                                 | 291                                            |
| SAP Portugal – Sistemas, Aplicações e Produtos Informáticos, Sociedade Unipessoal, Lda., Porto Salvo, Portugal | 100,0             | 52.387                                             | 1.968                                              | 14.405                                                 | 99                                             |
| SAP Public Serv. Hungary, Budapest, Ungarn                                                                     | 100,0             | 828                                                | 273                                                | 399                                                    | 5                                              |
| SAP Romania SRL, Bukarest, Rumänien                                                                            | 100,0             | 17.592                                             | 2.991                                              | 5.459                                                  | 94                                             |
| SAP Saudi Arabia Software Services Limited, Riyadh, Königreich Saudi-Arabien                                   | 100,0             | 26.297                                             | 2.973                                              | 30.207                                                 | 30                                             |
| SAP Saudi Arabia Software Trading Limited, Riyadh, Königreich Saudi-Arabien                                    | 51,0              | 15.919                                             | –1.322                                             | 7.828                                                  | 31                                             |
| SAP Service and Support (Ireland) Limited, Dublin, Irland                                                      | 100,0             | 60.434                                             | 2.032                                              | 27.736                                                 | 700                                            |
| SAP sistemi, aplikacije in produkti za obdelavo podatkov d.o.o., Ljubljana, Slowenien                          | 100,0             | 14.222                                             | 1.342                                              | 6.585                                                  | 24                                             |
| SAP Slovensko s.r.o., Bratislava, Slowakei                                                                     | 100,0             | 35.067                                             | 1.346                                              | 18.214                                                 | 140                                            |
| SAP Svenska Aktiebolag, Stockholm, Schweden                                                                    | 100,0             | 122.313                                            | 11.715                                             | 17.018                                                 | 117                                            |
| SAP Türkiye Yazılım Üretim ve Ticaret A.S., Istanbul, Türkei                                                   | 100,0             | 46.496                                             | 2.278                                              | 16.483                                                 | 96                                             |
| SAP UAB (Lithuania), Vilnius, Litauen                                                                          | 100,0             | 1.879                                              | –682                                               | –463                                                   | 3                                              |
| SAP West Balkans d.o.o., Belgrad, Serbien                                                                      | 100,0             | 8.832                                              | 1.414                                              | 2.265                                                  | 26                                             |
| Set Analyzer UK Limited, London, Großbritannien <sup>4)</sup>                                                  | 100,0             | 0                                                  | 0                                                  | 1.010                                                  | 0                                              |
| Sybase (Schweiz) GmbH, Zürich, Schweiz <sup>3), 4), 8)</sup>                                                   | 100,0             | 586                                                | –14                                                | 1.194                                                  | 7                                              |
| Sybase (UK) Limited, Maidenhead, Großbritannien <sup>3), 4), 8)</sup>                                          | 100,0             | 18.092                                             | 1.415                                              | –904                                                   | 205                                            |
| Sybase 365 Limited, Maidenhead, Großbritannien <sup>3), 4), 8)</sup>                                           | 100,0             | 0                                                  | 0                                                  | 0                                                      | 0                                              |
| Sybase ApS, Kopenhagen, Dänemark <sup>3), 4), 8)</sup>                                                         | 100,0             | 136                                                | 7                                                  | 437                                                    | 2                                              |
| Sybase Europe B.V., Utrecht, Niederlande <sup>3), 4), 8)</sup>                                                 | 100,0             | 65.075                                             | –11.767                                            | 12.508                                                 | 48                                             |
| Sybase France S.a.r.l., Paris, Frankreich <sup>3), 4), 8)</sup>                                                | 100,0             | 19.941                                             | 2.607                                              | –10.448                                                | 119                                            |
| Sybase Iberia S.L., Madrid, Spanien <sup>3), 4), 8)</sup>                                                      | 100,0             | 5.114                                              | 139                                                | –21.723                                                | 33                                             |
| Sybase Italia SRL, Mailand, Italien <sup>3), 4), 8)</sup>                                                      | 100,0             | 3.107                                              | –129                                               | –422                                                   | 34                                             |
| Sybase Luxembourg s.a.r.l., Luxemburg <sup>3), 4), 8)</sup>                                                    | 100,0             | 99                                                 | –4                                                 | –25                                                    | 0                                              |
| Sybase Nederland B.V., Utrecht, Niederlande <sup>3), 4), 8)</sup>                                              | 100,0             | 924                                                | 36                                                 | 4.949                                                  | 15                                             |
| Sybase Norge AS, Oslo, Norwegen <sup>3), 4), 8)</sup>                                                          | 100,0             | 398                                                | 15                                                 | 819                                                    | 3                                              |
| Sybase Software BVBA/SPRL, Zaventem, Belgien <sup>3), 4), 8)</sup>                                             | 100,0             | 1.582                                              | –7                                                 | 859                                                    | 19                                             |
| Sybase South Africa (Proprietary) Limited, Johannesburg, Südafrika <sup>3), 4), 8)</sup>                       | 100,0             | 7.788                                              | 560                                                | –5.284                                                 | 143                                            |



| Stand 31. Dezember 2010                                                                                    | Anteil am Kapital | Umsatz der Gesellschaft im Jahr 2010 <sup>1)</sup> | Gewinn/Verlust nach Steuern (–) 2010 <sup>1)</sup> | Eigenkapital der Gesellschaft 31.12.2010 <sup>1)</sup> | Anzahl Mitarbeiter am 31.12.2010 <sup>2)</sup> |
|------------------------------------------------------------------------------------------------------------|-------------------|----------------------------------------------------|----------------------------------------------------|--------------------------------------------------------|------------------------------------------------|
| Name und Sitz der Gesellschaft                                                                             | %                 | Tsd. €                                             | Tsd. €                                             | Tsd. €                                                 |                                                |
| Sybase Sverige AB, Kista, Schweden <sup>3), 4), 8)</sup>                                                   | 100,0             | 2.052                                              | 256                                                | 1.544                                                  | 25                                             |
| Systems Applications Products (Africa Region) (Proprietary) Limited, Johannesburg, Südafrika <sup>4)</sup> | 100,0             | 31.534                                             | 2.899                                              | 17.503                                                 | 13                                             |
| Systems Applications Products (Africa) (Proprietary) Limited, Johannesburg, Südafrika                      | 100,0             | 0                                                  | 6.950                                              | 101.028                                                | 0                                              |
| Systems Applications Products Nigeria Limited, Abuja, Nigeria <sup>4)</sup>                                | 100,0             | 12.531                                             | 953                                                | 1.696                                                  | 26                                             |
| Systems Applications Products South Africa (Proprietary) Limited, Johannesburg, Südafrika <sup>4)</sup>    | 89,5              | 177.582                                            | 14.582                                             | 36.850                                                 | 308                                            |
| TechniData Labs Bulgaria EOOD, Sofia, Bulgarien <sup>3), 4)</sup>                                          | 100,0             | 1.024                                              | 277                                                | 652                                                    | 24                                             |
| TomorrowNow (UK) Limited, Feltham, Großbritannien <sup>4)</sup>                                            | 100,0             | 0                                                  | 438                                                | 27                                                     | 0                                              |
| TomorrowNow Nederland B.V., Amsterdam, Niederlande                                                         | 100,0             | 0                                                  | –306                                               | –3.207                                                 | 1                                              |
| <b>AMERIKA</b>                                                                                             |                   |                                                    |                                                    |                                                        |                                                |
| 110405, Inc., Newtown Square, Pennsylvania, USA                                                            | 100,0             | 0                                                  | 0                                                  | 15.636                                                 | 0                                              |
| Business Objects Argentina S.R.L., Buenos Aires, Argentinien <sup>4)</sup>                                 | 100,0             | 0                                                  | 0                                                  | 83                                                     | 0                                              |
| Business Objects Option, LLC, Wilmington, Delaware, USA <sup>4)</sup>                                      | 100,0             | 0                                                  | 1.133                                              | 62.587                                                 | 0                                              |
| Clear Standards, Inc., Sterling, Virginia, USA <sup>4)</sup>                                               | 100,0             | 66                                                 | –1.212                                             | 16.074                                                 | 0                                              |
| Extended Systems, Inc., Boise, Idaho, USA <sup>3), 4)</sup>                                                | 100,0             | 0                                                  | 21                                                 | 17.041                                                 | 0                                              |
| Financial Fusion, Inc., Concord, Massachusetts, USA <sup>3), 4), 8)</sup>                                  | 100,0             | 0                                                  | 0                                                  | 0                                                      | 0                                              |
| Frictionless Commerce, Inc., Newtown Square, Pennsylvania, USA <sup>4)</sup>                               | 100,0             | 2.370                                              | –241                                               | 36.063                                                 | 0                                              |
| Highdeal, Inc., New York, New York, USA <sup>4)</sup>                                                      | 100,0             | 367                                                | 87                                                 | –20                                                    | 0                                              |
| iAnywhere Solutions Canada Ltd., Waterloo, Kanada <sup>3), 4), 8)</sup>                                    | 100,0             | 726                                                | 1.205                                              | 5.748                                                  | 149                                            |
| iAnywhere Solutions Inc., Dublin, Kalifornien, USA <sup>3), 4), 8)</sup>                                   | 100,0             | 16.153                                             | 8.454                                              | 102.682                                                | 91                                             |
| INEA Corporation USA, Wilmington, Delaware, USA <sup>4)</sup>                                              | 100,0             | 0                                                  | 76                                                 | 319                                                    | 0                                              |
| Inxight Federal Systems Group, Inc., Wilmington, Delaware, USA <sup>4)</sup>                               | 100,0             | 0                                                  | –2                                                 | 97                                                     | 0                                              |
| Khimetrics Canada, Inc., Montreal, Kanada <sup>4)</sup>                                                    | 100,0             | –                                                  | –                                                  | –                                                      | –                                              |
| Liberia LLC, Wilmington, Delaware, USA <sup>4)</sup>                                                       | 100,0             | –                                                  | –                                                  | –                                                      | –                                              |
| Maxware, Inc., Newtown Square, Pennsylvania, USA <sup>4)</sup>                                             | 100,0             | 227                                                | –333                                               | –412                                                   | 0                                              |
| SAF Simulation, Analysis and Forecasting U.S.A., Inc., Grapevine, Texas, USA <sup>4)</sup>                 | 70,9              | 3.988                                              | 83                                                 | 705                                                    | 13                                             |
| SAP America, Inc., Newtown Square, Pennsylvania, USA                                                       | 100,0             | 3.167.086                                          | 356.808                                            | 1.211.348                                              | 5.201                                          |
| SAP Andina y del Caribe C.A., Caracas, Venezuela <sup>7)</sup>                                             | 100,0             | 17.379                                             | –25.867                                            | 306                                                    | 56                                             |
| SAP ARGENTINA S.A., Buenos Aires, Argentinien                                                              | 100,0             | 119.988                                            | 3.863                                              | 20.951                                                 | 490                                            |
| SAP Brasil Ltda, São Paulo, Brasilien                                                                      | 100,0             | 407.585                                            | 15.130                                             | 111.708                                                | 1.094                                          |
| SAP Canada Inc., Toronto, Kanada                                                                           | 100,0             | 621.852                                            | 47.357                                             | 416.334                                                | 2.053                                          |
| SAP Colombia S.A.S., Bogota, Kolumbien                                                                     | 100,0             | 60.675                                             | –31                                                | –3.628                                                 | 154                                            |
| SAP Costa Rica, S.A., San José, Costa Rica <sup>3), 4)</sup>                                               | 100,0             | 0                                                  | 0                                                  | 0                                                      | 0                                              |
| SAP Financial Inc., Toronto, Kanada <sup>4)</sup>                                                          | 100,0             | 0                                                  | 25.297                                             | 7.680                                                  | 0                                              |
| SAP Global Marketing, Inc., New York, New York, USA                                                        | 100,0             | 224.592                                            | 3.042                                              | 18.234                                                 | 469                                            |
| SAP Government Support & Services, Inc., Newtown Square, Pennsylvania, USA <sup>4)</sup>                   | 100,0             | 38.482                                             | 3.237                                              | 120.886                                                | 173                                            |

Stand 31. Dezember 2010

| Name und Sitz der Gesellschaft                                                      | Anteil am Kapital | Umsatz der Gesellschaft im Jahr 2010 <sup>1)</sup> | Gewinn/Verlust nach Steuern (–) 2010 <sup>1)</sup> | Eigenkapital der Gesellschaft 31.12.2010 <sup>1)</sup> | Anzahl Mitarbeiter am 31.12.2010 <sup>2)</sup> |
|-------------------------------------------------------------------------------------|-------------------|----------------------------------------------------|----------------------------------------------------|--------------------------------------------------------|------------------------------------------------|
|                                                                                     | %                 | Tsd. €                                             | Tsd. €                                             | Tsd. €                                                 |                                                |
| SAP Industries, Inc., Scottsdale, Arizona, USA <sup>4),7)</sup>                     | 100,0             | 267.868                                            | 32.957                                             | 370.017                                                | 439                                            |
| SAP International, Inc., Miami, Florida, USA <sup>4)</sup>                          | 100,0             | 69.959                                             | 1.017                                              | 11.710                                                 | 47                                             |
| SAP Investments, Inc., Wilmington, Delaware, USA <sup>4)</sup>                      | 100,0             | 0                                                  | 11.541                                             | 616.468                                                | 0                                              |
| SAP LABS, LLC, Palo Alto, Kalifornien, USA <sup>4)</sup>                            | 100,0             | 462.541                                            | 25.582                                             | 115.334                                                | 2.091                                          |
| SAP México S.A. de C.V., Mexiko-Stadt, Mexiko                                       | 100,0             | 183.702                                            | –13.526                                            | 19.639                                                 | 381                                            |
| SAP PERU S.A.C., Inc., Lima, Peru                                                   | 100,0             | 20.092                                             | –1.496                                             | –4.734                                                 | 47                                             |
| SAP Public Services, Inc., Washington, D.C., USA <sup>4)</sup>                      | 100,0             | 307.374                                            | 40.608                                             | 237.316                                                | 249                                            |
| SAP Technologies Inc., Palo Alto, Kalifornien, USA <sup>3), 4)</sup>                | 100,0             | 0                                                  | 0                                                  | 0                                                      | 0                                              |
| SAP Ventures Fund I Holdings, LLC, Wilmington, Delaware, USA <sup>3)</sup>          | 100,0             | –                                                  | –                                                  | –                                                      | –                                              |
| Sybase 365 LLC, Dublin, Kalifornien, USA <sup>3), 4), 8)</sup>                      | 100,0             | 18.813                                             | –482                                               | 96.753                                                 | 139                                            |
| Sybase 365 Ltd., Tortola, Britische Jungferninseln <sup>3), 4), 8)</sup>            | 100,0             | 0                                                  | 0                                                  | –1.927                                                 | 0                                              |
| Sybase Argentina S.A., Buenos Aires, Argentinien <sup>3), 4), 8)</sup>              | 100,0             | 967                                                | 98                                                 | 1.170                                                  | 14                                             |
| Sybase Canada Ltd., Waterloo, Kanada <sup>3), 4), 8)</sup>                          | 100,0             | 4.149                                              | 234                                                | 8.416                                                  | 61                                             |
| Sybase de Mexico, S. De R.L. de C.V., Mexiko-Stadt, Mexiko <sup>3), 4), 8)</sup>    | 100,0             | 2.047                                              | 34                                                 | 1.615                                                  | 29                                             |
| Sybase do Brasil Software Ltda., São Paulo, Brasilien <sup>3), 4), 8)</sup>         | 100,0             | 7.775                                              | 344                                                | 1.053                                                  | 30                                             |
| Sybase Global LLC, Dublin, Kalifornien, USA <sup>3), 4), 8)</sup>                   | 100,0             | 0                                                  | 0                                                  | 7.291                                                  | 0                                              |
| Sybase Intl Holdings LLC, Dublin, Kalifornien, USA <sup>3), 4), 8)</sup>            | 100,0             | 0                                                  | 0                                                  | 11.665                                                 | 0                                              |
| Sybase, Inc., Dublin, Kalifornien, USA <sup>3), 4), 8)</sup>                        | 100,0             | 106.725                                            | 105.162                                            | 4.484.785                                              | 1.216                                          |
| TechniData America LLC, Wilmington, Delaware, USA <sup>3), 4)</sup>                 | 100,0             | 9.878                                              | –96                                                | –392                                                   | 64                                             |
| TomorrowNow, Inc., Bryan, Texas, USA <sup>4)</sup>                                  | 100,0             | 0                                                  | –1.065.737                                         | –991.350                                               | 3                                              |
| <b>ASIEN-PAZIFIK-JAPAN</b>                                                          |                   |                                                    |                                                    |                                                        |                                                |
| Beijing Zhang Zhong Hu Dong Xin Si Ju Shu Co. Ltd., Peking, China <sup>3), 4)</sup> | 100,0             | 810                                                | 7                                                  | –842                                                   | 7                                              |
| Business Objects Asia Pacific Pte Limited, Singapur <sup>4)</sup>                   | 100,0             | 0                                                  | 63                                                 | 39.646                                                 | 0                                              |
| Business Objects Australia Pty Limited, Sydney, Australien <sup>4)</sup>            | 100,0             | 0                                                  | –15.276                                            | –51                                                    | 0                                              |
| Business Objects Malaysia Sdn. Bhd., Kuala Lumpur, Malaysia <sup>4)</sup>           | 100,0             | 0                                                  | 0                                                  | 262                                                    | 0                                              |
| Business Objects Software (Shanghai) Co., Ltd., Shanghai, China                     | 100,0             | 12.724                                             | 1.052                                              | 4.834                                                  | 154                                            |
| Crystal Decisions (Hong Kong) Limited, Hongkong, China <sup>4)</sup>                | 100,0             | 0                                                  | –12                                                | 0                                                      | 0                                              |
| iAnywhere K.K., Tokio, Japan <sup>3), 4), 8)</sup>                                  | 100,0             | 3.780                                              | –40                                                | –2.602                                                 | 22                                             |
| PT SAP Indonesia, Jakarta, Indonesien                                               | 100,0             | 34.757                                             | 4.823                                              | 22.869                                                 | 41                                             |
| PT Sybase 365 Indonesia, Jakarta, Indonesien <sup>3), 4), 8)</sup>                  | 100,0             | 7                                                  | –1                                                 | 230                                                    | 0                                              |
| Ruan Lian Technologies (Beijing) Co. Ltd., Peking, China <sup>3), 4), 8)</sup>      | 100,0             | 0                                                  | –4                                                 | –1.051                                                 | 1                                              |
| SAP (Beijing) Software System Co., Ltd., Peking, China                              | 100,0             | 235.091                                            | –6.910                                             | 59.523                                                 | 2.143                                          |
| SAP Asia Pte Limited, Singapur                                                      | 100,0             | 199.117                                            | 8.780                                              | 25.829                                                 | 651                                            |
| SAP Australia Pty Limited, Sydney, Australien                                       | 100,0             | 421.184                                            | 52.771                                             | 224.011                                                | 573                                            |
| SAP HONG KONG CO. LIMITED, Hongkong, China                                          | 100,0             | 29.869                                             | 1.396                                              | 4.245                                                  | 57                                             |
| SAP INDIA (HOLDING) PTE LTD, Singapur                                               | 100,0             | 0                                                  | –5                                                 | 300                                                    | 0                                              |
| SAP INDIA PRIVATE LIMITED, Bangalore, Indien <sup>4)</sup>                          | 100,0             | 257.695                                            | 25.835                                             | 172.195                                                | 1.327                                          |

Stand 31. Dezember 2010

| Name und Sitz der Gesellschaft                                                                              | Anteil am Kapital | Umsatz der Gesellschaft im Jahr 2010 <sup>1)</sup> | Gewinn/Verlust nach Steuern (–) 2010 <sup>1)</sup> | Eigenkapital der Gesellschaft 31.12.2010 <sup>1)</sup> | Anzahl Mitarbeiter am 31.12.2010 <sup>2)</sup> |
|-------------------------------------------------------------------------------------------------------------|-------------------|----------------------------------------------------|----------------------------------------------------|--------------------------------------------------------|------------------------------------------------|
|                                                                                                             | %                 | Tsd. €                                             | Tsd. €                                             | Tsd. €                                                 |                                                |
| SAP JAPAN Co., Ltd., Tokio, Japan                                                                           | 100,0             | 517.418                                            | 33.893                                             | 436.595                                                | 1.075                                          |
| SAP Korea Limited, Seoul, Südkorea                                                                          | 100,0             | 98.741                                             | 10.141                                             | 24.010                                                 | 190                                            |
| SAP Labs India Private Limited, Bangalore, Indien                                                           | 100,0             | 137.311                                            | –8.821                                             | 8.468                                                  | 4.112                                          |
| SAP Malaysia Sdn. Bhd., Kuala Lumpur, Malaysia                                                              | 100,0             | 68.172                                             | 10.496                                             | 28.274                                                 | 119                                            |
| SAP New Zealand Limited, Auckland, Neuseeland                                                               | 100,0             | 43.924                                             | 5.509                                              | 28.560                                                 | 34                                             |
| SAP PHILIPPINES, INC., Makati, Philippinen                                                                  | 100,0             | 25.524                                             | 1.441                                              | 7.866                                                  | 36                                             |
| SAP R&D Center Korea, Inc., Seoul, Südkorea <sup>4)</sup>                                                   | 100,0             | 6.929                                              | 304                                                | 15.561                                                 | 70                                             |
| SAP SYSTEMS, APPLICATIONS AND PRODUCTS IN DATA PROCESSING (THAILAND) LTD., Bangkok, Thailand <sup>10)</sup> | 49,0              | 35.621                                             | 3.964                                              | 33.228                                                 | 41                                             |
| SAP TAIWAN CO., LTD., Taipei, Taiwan                                                                        | 100,0             | 47.116                                             | 5.220                                              | 19.796                                                 | 69                                             |
| Sybase (N.Z.) Limited, Wellington, Neuseeland <sup>3), 4), 8)</sup>                                         | 100,0             | 1.107                                              | –414                                               | 3.518                                                  | 5                                              |
| Sybase (Singapore) Pte Limited, Singapur <sup>3), 4), 8)</sup>                                              | 100,0             | 3.099                                              | 340                                                | 1.012                                                  | 183                                            |
| Sybase 365 Ltd. (HK), Hongkong, China <sup>3), 4), 8)</sup>                                                 | 100,0             | –                                                  | –                                                  | –                                                      | –                                              |
| Sybase Australia Pty Limited, Sydney, Australia <sup>3), 4), 8)</sup>                                       | 100,0             | 6.579                                              | –772                                               | 6.053                                                  | 38                                             |
| Sybase Hong Kong Limited, Hongkong, China <sup>3), 4), 8)</sup>                                             | 100,0             | 3.461                                              | –711                                               | 338                                                    | 77                                             |
| Sybase India, Ltd., Dublin, Kalifornien, USA <sup>3), 4), 8)</sup>                                          | 100,0             | 0                                                  | –46                                                | 1.693                                                  | 0                                              |
| Sybase KK, Tokio, Japan <sup>3), 4), 8)</sup>                                                               | 100,0             | 10.759                                             | –3.055                                             | 1.178                                                  | 58                                             |
| Sybase Korea, Ltd, Seoul, Südkorea <sup>3), 4), 8)</sup>                                                    | 100,0             | 4.507                                              | 128                                                | 2.557                                                  | 47                                             |
| Sybase Philippines Inc., Dublin, Kalifornien, USA <sup>3), 4), 8)</sup>                                     | 100,0             | 0                                                  | –8                                                 | –11                                                    | 0                                              |
| Sybase Software (China) Co. Ltd., Peking, China <sup>3), 4), 8)</sup>                                       | 100,0             | 7.687                                              | 1.039                                              | 13.418                                                 | 383                                            |
| Sybase Software (India) Private Ltd, Mumbai, Indien <sup>3), 4), 8)</sup>                                   | 100,0             | 3.257                                              | 827                                                | 7.090                                                  | 204                                            |
| Sybase Software (Malaysia) Sdn. Bhd., Kuala Lumpur, Malaysia <sup>3), 4), 8)</sup>                          | 100,0             | 1.056                                              | 58                                                 | 1.532                                                  | 3                                              |
| Sybase Taiwan Co. Ltd., Taipei, Taiwan <sup>3), 4), 8)</sup>                                                | 100,0             | 2.311                                              | 118                                                | 1.458                                                  | 19                                             |
| Technidata Asia Pte Limited, Singapur <sup>3), 4)</sup>                                                     | 100,0             | 176                                                | –183                                               | 97                                                     | 3                                              |
| TomorrowNow Australia Pty Limited, Sydney, Australien <sup>4)</sup>                                         | 100,0             | 0                                                  | 5                                                  | 385                                                    | 0                                              |
| TomorrowNow Singapore Pte Limited, Singapur <sup>4)</sup>                                                   | 100,0             | 0                                                  | 0                                                  | 87                                                     | 0                                              |

Stand 31. Dezember 2010

| Name und Sitz der Gesellschaft                                                | Anteil am Kapital | Umsatz der Gesellschaft im Jahr 2010 <sup>1)</sup> | Gewinn/Verlust nach Steuern (–) 2010 <sup>1)</sup> | Eigenkapital der Gesellschaft 31.12.2010 <sup>1)</sup> | Anzahl Mitarbeiter am 31.12.2010 <sup>2)</sup> |
|-------------------------------------------------------------------------------|-------------------|----------------------------------------------------|----------------------------------------------------|--------------------------------------------------------|------------------------------------------------|
|                                                                               | %                 | Tsd. €                                             | Tsd. €                                             | Tsd. €                                                 |                                                |
| <b>II. ASSOZIIERTE UNTERNEHMEN</b>                                            |                   |                                                    |                                                    |                                                        |                                                |
| ArisGlobal Holdings, LLC, Stamford, Connecticut, USA <sup>4)</sup>            | 16,00             | 37.835                                             | 4.175                                              | 7.145                                                  | 700                                            |
| Crossgate AG, München, Deutschland                                            | 6,37              | 33.499                                             | 3.673                                              | 37.000                                                 | 251                                            |
| Greater Pacific Capital (Cayman), L.P., Grand Cayman, Cayman Islands          | 5,35              | –                                                  | –                                                  | –                                                      | 0                                              |
| Original1 GmbH, Frankfurt am Main, Deutschland                                | 40,00             | 39                                                 | –4.085                                             | 3.900                                                  | 12                                             |
| Procurement Negócios Eletrônicos S/A, Rio de Janeiro, Brasilien <sup>4)</sup> | 17,00             | 15.554                                             | 1.918                                              | 15.921                                                 | 0                                              |
| RIB Software AG, Stuttgart, Deutschland                                       | 7,15              | –                                                  | –                                                  | –                                                      | 219                                            |
| TechniData IT-Service GmbH, Markdorf, Deutschland <sup>4)</sup>               | 26,00             | 9.442                                              | 485                                                | 892                                                    | 85                                             |

<sup>1)</sup> Diese Werte basieren auf den lokalen IFRS-Jahresabschlüssen vor Konsolidierung und zeigen daher nicht den Beitrag der Gesellschaft zum Konzernabschluss.

Die Umrechnung in die Konzernwährung erfolgt für das Eigenkapital mit dem Stichtagskurs, für Umsatz und Jahresüberschuss/-fehlbetrag mit dem Durchschnittskurs.

<sup>2)</sup> Zum Stichtag 31.12.2010 einschließlich Geschäftsführer in Vollzeitäquivalenten

<sup>3)</sup> Erstmals in den Konzernabschluss einbezogen 2010

<sup>4)</sup> Mittelbar gehalten

<sup>5)</sup> Gesellschaft mit Ergebnisabführungsvertrag

<sup>6)</sup> Die restlichen Aktien werden von einem Treuhänder gehalten.

<sup>7)</sup> 2010 neu strukturiert und/oder umfirmiert

<sup>8)</sup> Die Umsatz- und Gewinnwerte basieren auf den lokalen Abschlüssen vor Konsolidierung. Aufgrund der Akquisition von Sybase zum 26.7.2010 basieren die lokalen Ergebnisse auf IFRS für die Zeit nach der Akquisition. Sie enthalten akquisitionsbezogene Anpassungen.

<sup>9)</sup> In den Konzernabschluss einbezogene Tochterunternehmen, die gemäß § 264 Absatz 3 HGB oder § 264b HGB von bestimmten Rechnungslegungsvorschriften befreit sind, unter anderem von der Erstellung eines Anhangs und Lageberichts sowie von der Prüfung und der Offenlegung des Jahresabschlusses und Lageberichts.

<sup>10)</sup> Die restlichen Aktien sind Vorzugsaktien ohne Stimmrecht.

---

---

---

Stand 31. Dezember 2010

---

Name und Sitz der Gesellschaft

---

**III. SONSTIGE BETEILIGUNGSUNTERNEHMEN (Beteiligungsquote  $\geq$  5 %)**

---

Aepona Ltd., Belfast, Nordirland, Großbritannien

---

Apigee Corporation, Santa Clara, Kalifornien, USA

---

Apriso Corporation, Long Beach, Kalifornien, USA

---

Connectiva Systems, Inc., New York, New York, USA

---

Deutsches Forschungszentrum für Künstliche Intelligenz GmbH, Kaiserslautern, Deutschland

---

EIT ICT Labs GmbH, Berlin, Deutschland

---

Ignite Technologies, Inc., Frisco, Texas, USA

---

InnovationLab GmbH, Heidelberg, Deutschland

---

iTAC Software AG, Dernbach, Deutschland

---

iYogi Holdings Pvt. Ltd., Port Louis, Mauritius

---

Lavante, Inc., San Jose, Kalifornien, USA

---

MuleSoft, Inc., San Francisco, Kalifornien, USA

---

MVP Strategic Partnership Fund GmbH & Co. KG, Grünwald, Deutschland

---

OnDeck Capital, Inc., New York, New York, USA

---

Onventis GmbH, Stuttgart, Deutschland

---

Post for Systems, Kairo, Ägypten

---

Powersim Corporation, Herndon, Virginia, USA

---

QCLS Corporation, Woodside, Kalifornien, USA

---

Qumu, Inc., San Bruno, Kalifornien, USA

---

Realize Corporation, Tokio, Japan

---

Retail Solutions, Inc. (rechtlicher Name: T3C, Inc.), Mountain View, Kalifornien, USA

---

Return Path, Inc., New York, New York, USA

---

Smart City Planning, Inc., Tokio, Japan

---

SupplyOn AG, Hallbergmoos, Deutschland

---

Technologie- und Gründerzentrum Walldorf Stiftung GmbH, Walldorf, Deutschland

---

---

Walldorf, den 3. März 2011

SAP AG  
Walldorf, Baden  
Der Vorstand



Bill McDermott



Jim Hagemann Snabe



Werner Brandt



Angelika Dammann



Gerhard Oswald



Vishal Sikka

---

# Bericht des Vorstands zum internen Kontrollsystem für die Finanzberichterstattung im Konzernabschluss

---

Nach US-amerikanischen Vorschriften ist der Vorstand dazu verpflichtet, einen Bericht über das interne Kontrollsystem für die Finanzberichterstattung im Konzernabschluss abzugeben. Der Wortlaut dieses Berichts für das Geschäftsjahr 2010 lautet wie folgt:

Der Vorstand der SAP ist verantwortlich für das Einrichten und Aufrechterhalten eines angemessenen internen Kontrollsystems für die Finanzberichterstattung im Konzernabschluss, wobei dieses interne Kontrollsystem der Definition in Rules 13a-15(f) und 15d-15(f) nach dem Securities Exchange Act von 1934 zu entsprechen hat. Bei SAP ist das interne Kontrollsystem für die Finanzberichterstattung im Konzernabschluss ein Prozess, der unter der Aufsicht der beiden Vorstandsmitglieder und des Finanzvorstands der SAP aufgesetzt wurde, um hinreichende Sicherheit hinsichtlich der Zuverlässigkeit der Finanzberichterstattung sowie der Erstellung von Konzernabschlüssen in Übereinstimmung mit den International Financial Reporting Standards (IFRS) in der vom International Accounting Standards Board (IASB) verabschiedeten Fassung zu gewährleisten.

Der Vorstand der SAP hat die Wirksamkeit des internen Kontrollsystems für die Finanzberichterstattung im Konzernabschluss zum 31. Dezember 2010 beurteilt. Bei dieser Beurteilung hat der Vorstand der SAP die Kriterien zu Grunde gelegt, die im Internal Control – Integrated Framework des Committee of Sponsoring Organizations of the Treadway Commission (COSO) festgelegt sind.

Aufgrund der Bewertung anhand dieser Kriterien ist der Vorstand der SAP zu dem Schluss gekommen, dass das interne Kontrollsystem für die Finanzberichterstattung im Konzernabschluss zum 31. Dezember 2010 wirksam war.

Die KPMG AG Wirtschaftsprüfungsgesellschaft, unser unabhängiger Abschlussprüfer, hat ihren Bestätigungsvermerk zum internen Kontrollsystem der SAP für die Finanzberichterstattung im Konzernabschluss abgegeben. Dieser ist im Bestätigungsvermerk zum Konzernabschluss und zusammengefassten Konzernlagebericht der SAP zum 31. Dezember 2010 enthalten.

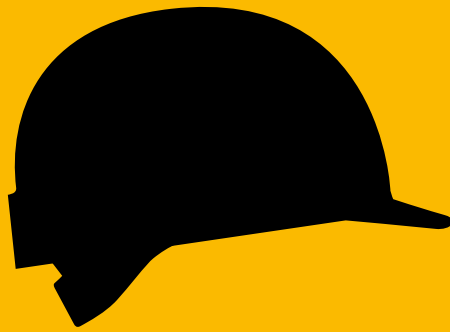

# 2 Mio.

LÖSUNGEN FÜR GESUNDHEITS- UND ARBEITSSCHUTZ VON SAP  
HELFE 2 MILLIONEN MENSCHEN,  
SICH VOR RISIKEN AM ARBEITSPLATZ ZU SCHÜTZEN.



## **275 Zusätzliche Informationen**

|     |                                    |
|-----|------------------------------------|
| 276 | Fünffjahresübersicht               |
| 279 | Glossar                            |
| 288 | Adressen                           |
| 289 | Publikationen für unsere Aktionäre |
| 290 | Finanzkalender                     |
| 291 | Impressum                          |

# Fünffjahresübersicht<sup>1)</sup>

## SAP-Konzern

| Mio. €, soweit nicht anders vermerkt                                                                                         | 2010          | 2009          | 2008          | 2007          | 2006         |
|------------------------------------------------------------------------------------------------------------------------------|---------------|---------------|---------------|---------------|--------------|
| <b>Umsatz und Ergebnis</b>                                                                                                   |               |               |               |               |              |
| <b>Softwareerlöse</b>                                                                                                        | <b>3.265</b>  | <b>2.607</b>  | <b>3.606</b>  | <b>3.407</b>  | <b>3.003</b> |
| davon Region EMEA                                                                                                            | 1.471         | 1.304         | 1.844         | 1.697         | 1.492        |
| davon Region Amerika                                                                                                         | 1.247         | 855           | 1.184         | 1.228         | 1.133        |
| davon Region Asien-Pazifik-Japan                                                                                             | 547           | 449           | 578           | 482           | 378          |
| <b>Software- und softwarebezogene Serviceerlöse (IFRS)</b>                                                                   | <b>9.794</b>  | <b>8.198</b>  | <b>8.466</b>  | <b>7.441</b>  | <b>6.605</b> |
| Non-IFRS-Anpassungen                                                                                                         | 74            | 11            | 157           | -14           | N/A          |
| <b>Software- und softwarebezogene Serviceerlöse (Non-IFRS)</b>                                                               | <b>9.868</b>  | <b>8.209</b>  | <b>8.623</b>  | <b>7.427</b>  | <b>N/A</b>   |
| <b>Umsatzerlöse (IFRS)</b>                                                                                                   | <b>12.464</b> | <b>10.672</b> | <b>11.575</b> | <b>10.256</b> | <b>9.402</b> |
| Non-IFRS-Anpassungen                                                                                                         | 74            | 11            | 157           | -14           | N/A          |
| <b>Umsatzerlöse (Non-IFRS)</b>                                                                                               | <b>12.538</b> | <b>10.683</b> | <b>11.732</b> | <b>10.242</b> | <b>N/A</b>   |
| <i>Software- und softwarebezogene Serviceerlösquote (Software- und softwarebezogene Serviceerlöse in % der Umsatzerlöse)</i> | 79            | 77            | 73            | 73            | 70           |
| <b>Betriebsergebnis (IFRS)</b>                                                                                               | <b>2.591</b>  | <b>2.588</b>  | <b>2.701</b>  | <b>2.698</b>  | <b>2.503</b> |
| Non-IFRS-Anpassungen                                                                                                         | 1.357         | 339           | 600           | 95            | N/A          |
| <b>Betriebsergebnis (Non-IFRS)</b>                                                                                           | <b>3.947</b>  | <b>2.927</b>  | <b>3.301</b>  | <b>2.793</b>  | <b>N/A</b>   |
| <i>Operative Marge (Betriebsergebnis in % vom Umsatz, IFRS)</i>                                                              | 21            | 24            | 23            | 26            | 27           |
| <i>Operative Marge (Betriebsergebnis in % vom Umsatz, Non-IFRS)</i>                                                          | 32            | 27            | 28            | 27            | N/A          |
| <i>Operative Marge (Non-IFRS, währungsbereinigt)</i>                                                                         | 31            | 28            | N/A           | N/A           | N/A          |
| Aufwendungen für aktienorientierte Vergütungsprogramme                                                                       | 58            | 54            | 63            | 106           | 129          |
| Restrukturierungsaufwendungen <sup>2)</sup>                                                                                  | -3            | 198           | 60            | 2             | 3            |
| Akquisitionsbedingte Aufwendungen <sup>3)</sup>                                                                              | 300           | 271           | 297           | 61            | 43           |
| Finanzergebnis, netto                                                                                                        | -67           | -80           | -50           | 124           | 122          |
| <b>Gewinn vor Steuern</b>                                                                                                    | <b>2.338</b>  | <b>2.435</b>  | <b>2.624</b>  | <b>2.824</b>  | <b>2.614</b> |
| <i>Gewinn vor Steuern in % der Umsatzerlöse</i>                                                                              | 19            | 23            | 23            | 28            | 28           |
| <i>Eigenkapitalrendite (Konzernergebnis in % vom durchschnittlichen Eigenkapital)</i>                                        | 20            | 22            | 27            | 30            | 31           |
| Ertragsteueraufwand                                                                                                          | -525          | -685          | -776          | -916          | -778         |
| <b>Gewinn nach Steuern</b>                                                                                                   | <b>1.813</b>  | <b>1.750</b>  | <b>1.848</b>  | <b>1.908</b>  | <b>1.836</b> |

## SAP-Konzern

| Mio. €, soweit nicht anders vermerkt                                                                                                   | 2010          | 2009          | 2008          | 2007          | 2006         |
|----------------------------------------------------------------------------------------------------------------------------------------|---------------|---------------|---------------|---------------|--------------|
| <b>Liquidität und Kapitalflussrechnung</b>                                                                                             |               |               |               |               |              |
| Cashflows aus der betrieblichen Tätigkeit                                                                                              | 2.932         | 3.015         | 2.158         | 1.932         | 1.847        |
| Cashflows aus Investitionstätigkeiten                                                                                                  | -3.994        | -299          | -3.766        | -1.391        | -134         |
| Cashflows aus Finanzierungstätigkeiten                                                                                                 | 2.510         | -2.166        | 1.281         | -1.287        | -1.375       |
| Zahlungsmittel und Zahlungsmitteläquivalente                                                                                           | 3.518         | 1.884         | 1.280         | 1.608         | 2.399        |
| Verfügungsbeschränkte Zahlungsmittel                                                                                                   | N/A           | N/A           | N/A           | 550           | N/A          |
| Kurzfristige Wertpapiere                                                                                                               | 10            | 400           | 382           | 498           | 483          |
| Konzernliquidität (Zahlungsmittel und Zahlungsmitteläquivalente sowie kurzfristige Wertpapiere, verfügbungsbeschränkte Zahlungsmittel) | 3.528         | 2.284         | 1.662         | 2.656         | 2.882        |
| Finanzschulden (Verbindlichkeiten gegenüber Kreditinstituten, Schuldscheindarlehen, Anleihe)                                           | 4.378         | 703           | 2.321         | 27            | 27           |
| Nettoliquidität                                                                                                                        | -850          | 1.581         | -659          | 2.629         | 2.855        |
| Außenstandsdauer der Forderungen (Days of Sales Outstanding, DSO)                                                                      | 65            | 79            | 71            | 66            | 68           |
| <b>Vermögens- und Kapitalstruktur</b>                                                                                                  |               |               |               |               |              |
| Forderungen aus Lieferungen und Leistungen und sonstige Forderungen <sup>4)</sup>                                                      | 3.177         | 2.598         | 3.219         | 2.898         | 2.443        |
| Summe kurzfristiger Vermögenswerte                                                                                                     | 7.143         | 5.255         | 5.571         | 6.184         | 5.769        |
| Summe langfristiger Vermögenswerte                                                                                                     | 13.698        | 8.119         | 8.329         | 3.977         | 3.563        |
| Summe kurzfristiger Schulden (inklusive RAP)                                                                                           | 5.149         | 3.416         | 5.824         | 3.184         | 2.762        |
| Summe langfristiger Schulden (inklusive RAP und Anteilen anderer Gesellschafter)                                                       | 5.868         | 1.467         | 905           | 499           | 447          |
| <b>Summe des Eigenkapitals</b>                                                                                                         | <b>9.824</b>  | <b>8.491</b>  | <b>7.171</b>  | <b>6.478</b>  | <b>6.123</b> |
| <b>Summe Vermögenswerte/Summe Eigenkapital und Schulden</b>                                                                            | <b>20.841</b> | <b>13.374</b> | <b>13.900</b> | <b>10.161</b> | <b>9.332</b> |
| <i>Eigenkapitalquote (Eigenkapital in % der Bilanzsumme)</i>                                                                           | 47            | 63            | 52            | 64            | 66           |
| <i>Fremdkapitalquote (Fremdkapital in % der Bilanzsumme)</i>                                                                           | 53            | 37            | 48            | 36            | 34           |
| Investitionen in immaterielle Vermögenswerte und Sachanlagen (inklusive Aktivierungen aus Akquisitionen)                               | 5.502         | 299           | 4.898         | 1.097         | 902          |
| Abschreibungen auf immaterielle Vermögenswerte und Sachanlagen                                                                         | 534           | 499           | 539           | 262           | 214          |
| <b>Mitarbeiter<sup>3)</sup> und Personalaufwand</b>                                                                                    |               |               |               |               |              |
| Mitarbeiter am Jahresende                                                                                                              | 53.513        | 47.584        | 51.544        | 44.023        | 39.355       |
| Mitarbeiter im Jahresdurchschnitt                                                                                                      | 49.970        | 48.471        | 51.638        | 42.302        | 38.053       |
| Anteil weiblicher Mitarbeiter in %                                                                                                     | 30            | 29            | 29            | 30            | 30           |
| Personalaufwand                                                                                                                        | 5.261         | 4.963         | 4.894         | 4.191         | 3.882        |
| Personalaufwand – ohne aktienorientierte Vergütungsprogramme                                                                           | 5.203         | 4.909         | 4.831         | 4.085         | 3.753        |
| Personalaufwand pro Mitarbeiter – ohne aktienorientierte Vergütungsprogramme in Tsd. €                                                 | 104           | 101           | 94            | 97            | 99           |

## SAP-Konzern

| Mio. €, soweit nicht anders vermerkt                                                      | 2010   | 2009   | 2008   | 2007   | 2006              |
|-------------------------------------------------------------------------------------------|--------|--------|--------|--------|-------------------|
| <b>Entwicklungsaufwendungen</b>                                                           |        |        |        |        |                   |
| Aufwendungen für Forschung und Entwicklung (F&E)                                          | 1.729  | 1.591  | 1.627  | 1.461  | 1.344             |
| F&E-Quote (Aufwendungen für F&E in % der Umsatzerlöse)                                    | 14     | 15     | 14     | 14     | 14                |
| F&E-Intensität (Aufwendungen für F&E in % der operativen Aufwendungen)                    | 18     | 20     | 18     | 19     | 19                |
| Mitarbeiter im F&E-Bereich am Jahresende <sup>5)</sup>                                    | 15.884 | 14.813 | 15.547 | 12.951 | 11.801            |
| <b>Kapitalmarktorientierte Kennzahlen</b>                                                 |        |        |        |        |                   |
| Ausstehende Aktien am Jahresende in Mio. <sup>6)</sup>                                    | 1.227  | 1.226  | 1.226  | 1.246  | 1.268             |
| Anzahl der gewichteten durchschnittlichen SAP-Aktien, unverwässert, in Mio. <sup>6)</sup> | 1.188  | 1.188  | 1.190  | 1.207  | 1.226             |
| Gewinn je Aktie in €                                                                      | 1,52   | 1,47   | 1,55   | 1,58   | 1,50              |
| Anzahl der gewichteten durchschnittlichen SAP-Aktien, voll verwässert <sup>6)</sup>       | 1.189  | 1.189  | 1.191  | 1.210  | 1.231             |
| Gewinn je Aktie, voll verwässert, in € <sup>6)</sup>                                      | 1,52   | 1,47   | 1,55   | 1,58   | 1,49              |
| Dividende je Stammaktie in € <sup>6), 7)</sup>                                            | 0,60   | 0,50   | 0,50   | 0,50   | 0,46              |
| Ausschüttungssumme <sup>7)</sup>                                                          | 713    | 594    | 594    | 594    | 556               |
| Ausschüttungsquote (Ausschüttungssumme in % des Konzernergebnisses) <sup>7)</sup>         | 39     | 34     | 32     | 31     | 30                |
| Börsenkurs der SAP-Aktie am Geschäftsjahresende in € <sup>6)</sup>                        | 38,10  | 33,00  | 25,24  | 35,53  | 40,26             |
| Höchstkurs der SAP-Aktie in € <sup>6)</sup>                                               | 38,40  | 35,26  | 39,93  | 42,27  | 46,86             |
| Tiefstkurs der SAP-Aktie in € <sup>6)</sup>                                               | 31,12  | 25,01  | 23,45  | 33,37  | 34,56             |
| Börsenkapitalisierung am Jahresende in Mrd. €                                             | 46,7   | 40,5   | 30,9   | 44,3   | 51,0              |
| Rendite einer Anlage in SAP-Aktien <sup>8)</sup> – Anlagezeitraum 1 Jahr, in %            | 17,00  | 32,90  | -27,90 | -10,60 | 6,00              |
| Rendite einer Anlage in SAP-Aktien <sup>8)</sup> – Anlagezeitraum 5 Jahre, in %           | 1,20   | 1,30   | -4,40  | 14,50  | 2,60              |
| Rendite einer Anlage in SAP-Aktien <sup>8)</sup> – Anlagezeitraum 10 Jahre, in %          | 3,20   | -1,20  | -1,10  | 5,20   | 16,90             |
| <b>Nicht finanzielle Leistungsindikatoren</b>                                             |        |        |        |        |                   |
| CO <sub>2</sub> -Ausstoß in Kt                                                            | 425    | 450    | 530    | 565    | 505 <sup>9)</sup> |
| Frauen in Führungspositionen <sup>10)</sup> in %                                          | 11,5   | 11,0   | 8,7    | 11,0   | 11,4              |
| Frauen in Managementpositionen <sup>10)</sup> in %                                        | 13,7   | 14,9   | 14,6   | 14,7   | 11,9              |
| Frauen als Teamleiter <sup>10)</sup> in %                                                 | 19,5   | 19,0   | 19,9   | 19,8   | 21,5              |
| Weibliche Manager (gesamt in %)                                                           | 17,8   | 17,7   | 18,1   | 18,2   | 18,8              |
| Fluktuationsrate in %                                                                     | 9      | 11     | 11     | 10     | 10                |

<sup>1)</sup> Die Werte der Geschäftsjahre 2006 bis 2010 sind nach IFRS berechnet, sofern nicht anders vermerkt.

<sup>2)</sup> hiervon im Jahr 2010 –5 Mio. € und im Jahr 2009 4 Mio. € akquisitionsbedingte Aufwendungen

<sup>3)</sup> Die Werte der Geschäftsjahre 2010, 2009, 2008 und 2007 sind nach IFRS, die Werte des Geschäftsjahres 2006 sind nach US-GAAP ermittelt.

<sup>4)</sup> ab dem Jahr 2008 inklusive sonstiger Forderungen

<sup>5)</sup> umgerechnet in Vollzeitbeschäftigte

<sup>6)</sup> Die in der Tabelle dargestellten Beträge berücksichtigen die Ausgabe von Gratisaktien im Verhältnis 1 : 3 im Rahmen der Kapitalerhöhung 2006.

<sup>7)</sup> für das Jahr 2010 vorgeschlagene Dividende und unter Berücksichtigung des Bestands an eigenen Aktien zum Jahresende 2010

<sup>8)</sup> Annahme: Reinvestition aller Erträge

<sup>9)</sup> Die Angaben zum CO<sub>2</sub>-Ausstoß für 2006 basieren auf Messmethoden früherer Jahre.

<sup>10)</sup> Die Angaben beziehen sich auf unterschiedliche Hierarchiestufen.

---

# Glossar

---

## A

---

### **Add-on**

SAP-Anwendung, die technisch von einer anderen SAP-Anwendung abhängig ist und nur in Verbindung mit dieser Anwendung installiert werden kann

### **Alloy**

Von IBM und SAP entwickelte Software, die den Zugriff auf SAP-Anwendungen und Informationen über IBM Lotus Notes ermöglicht und die Interaktion mit Menschen, Prozessen und Informationen vereinfacht

### **Americas' SAP Users' Group (ASUG)**

Größte Anwendervereinigung von SAP-Kunden mit über 50.000 Mitgliedern. SAP-Kunden haben sich weltweit nach Regionen in Anwendervereinigungen zusammengeschlossen, um Wissen auszutauschen und Einfluss auf die SAP-Entwicklung zu nehmen.

### **Anwendung**

Software zur Unterstützung bestimmter Geschäftsprozesse oder Aktivitäten eines Unternehmens und spezieller Geschäftsanforderungen

## B

---

### **Betriebsrat**

Gesetzliches Organ zur Vertretung der Arbeitnehmerinteressen und zur Wahrung der betrieblichen Mitbestimmung gegenüber dem Arbeitgeber in Betrieben des privaten Rechts. Rechtliche Grundlage ist das Betriebsverfassungsgesetz. Die in Deutschland arbeitenden Mitarbeiterinnen und Mitarbeiter der SAP AG haben am 21. Juni 2006 erstmals einen Betriebsrat gewählt.

### **Branchenlösung**

Lösung, die die speziellen Anforderungen einer bestimmten Geschäftssparte oder Branche abdeckt

### **Business Process Expert Community**

Onlinenetzwerk, das als Teil des SAP Community Network SAP-Kunden, Wirtschaftsanalysten, Berater und SAP-interne Experten miteinander verbindet. Die Business Process Expert Community ist ein einzigartiges Forum für den Wissensaustausch, das sich mit den unterschiedlichsten Prozess-, Implementierungs- und Lösungsthemen befasst.

### **Business User**

Mitarbeiter, zu deren Aufgaben das Suchen und Austauschen von Informationen, die Zusammenarbeit mit anderen, die Koordination von Projekten, das Ausarbeiten von Strategien und die Entwicklung neuer Ideen auf der Grundlage von Informationen aus unterschiedlichen Quellen gehören. Sie werden auch als Wissensarbeiter oder als Business Consumer bezeichnet.

## C

---

### **Cloud Computing**

Oberbegriff für flexible IT-Services wie Speicherkapazitäten, Rechenleistung, Entwicklungsumgebungen und Anwendungen, die Privatkunden und Unternehmen über das Internet oder per Hosting nutzen können. Der Zugriff auf die Services erfolgt bei Bedarf „in the cloud“, also über das Internet, sodass keine eigenen IT-Ressourcen mehr im Unternehmen erforderlich sind. Siehe Software as a Service

### **Custom Development Project (CDP) (Kundenspezifisches Entwicklungsprojekt)**

Entwicklung einer kundenspezifischen Lösung, die speziellen Geschäftsanforderungen entspricht und bei SAP oder in einem Entwicklungssystem des Kunden entwickelt wird

## D

---

### **DSAG**

Abkürzung für „Deutschsprachige SAP-Anwendergruppe“, die rund 26.000 Mitglieder im deutschsprachigen Raum hat

### **Duet**

Software, die gemeinsam von SAP und Microsoft entwickelt wurde und Anwendern den Zugriff auf ausgewählte SAP-Software und Daten über Microsoft-Office-Anwendungen ermöglicht

### **Durchgängiger Prozess**

Mehrere Geschäftsprozesse, die eine geschäftliche Anforderung eines Unternehmens von Anfang bis Ende abdecken. Für einen durchgängigen Prozess sind in der Regel Aktivitäten erforderlich, die funktions-, organisations- oder unternehmensübergreifend erfolgen. Die Software und Technologie der SAP unterstützt Kunden bei der Abwicklung durchgängiger Prozesse.

---

## E

### **Ecosystem**

Netz, das die SAP, ihre Kunden und Partner umfasst und den Nutzen, den die SAP ihren Kunden bietet, vergrößert. Kunden finden hier das gebündelte Fachwissen aus Communitys, innovative Partnerlösungen und branchenführende Methoden für die gemeinsame Entwicklung von Innovationen und die Zusammenarbeit. Sie können dadurch den größtmöglichen Nutzen aus ihren Investitionen in SAP-Software ziehen.

### **Enterprise Resource Planning**

Siehe SAP ERP

### **Enterprise Services**

Zusammenstellung hochintegrierter Webservices, auf die von Anwendungen zugegriffen werden kann und die von diesen immer wieder zur Unterstützung von Geschäftsprozessen genutzt werden können. Enterprise Services werden als Bausteine bei der Zusammenstellung größerer Softwareeinheiten verwendet. Sie können schnell von der SAP oder ihren Partner definiert und zu neuen Anwendungen zusammengestellt werden und damit neue Geschäftsprozesse ermöglichen. Siehe Webservice

### **Erweiterungspaket**

Optionales Softwarepaket, mit dem Unternehmen Innovationen nutzen können, ohne die Stabilität ihrer Kernsoftware zu beeinträchtigen. Erweiterungspakete erhalten verbesserte allgemeine und branchenspezifische Funktionen, Enterprise Services sowie andere Verbesserungen an der Benutzeroberfläche und den Funktionen. Unternehmen können ausgewählte Funktionen, die in den Erweiterungspaketen enthalten sind, aktivieren und nach Bedarf mit minimaler Beeinträchtigung des Geschäftsbetriebs implementieren.

---

## G

### **Geschäftsprozess**

Logisch zusammenhängende Aktivitäten innerhalb eines Unternehmens zur Abwicklung einer bestimmten Aufgabe. Ein typisches Beispiel hierfür ist die Auftragsabwicklung. SAP stellt Software und Technologie zur Verfügung, die Geschäftsprozesse ermöglichen und unterstützen.

### **Geschäftsprozessplattform**

Einheitliche IT-Umgebung, in der Unternehmen ihre Kerngeschäftsprozesse abwickeln und immer wieder umstellen, ausbauen und neue Geschäftsprozesse schaffen. Eine Geschäftsprozessplattform ermöglicht ein schnelles Anpassen an geänderte Bedingungen und innovative Geschäftsprozesse. Die Angebote der SAP können als Geschäftsprozessplattform in einem Unternehmen oder als Ausgangspunkt für eine eigene spezielle Geschäftsprozessplattform des Unternehmens dienen. Zu den Angeboten der SAP gehören sofort einsetzbare Software, wiederverwendbare Enterprise Services und Technologie zur Zusammenstellung und Implementierung von Software, die Geschäftsprozesse unterstützt.

---

## I

### **In-Memory-Datenbank**

Datenbank, die alle aktiven Datensätze im Hauptspeicher statt auf der Festplatte behält. Der Zugriff auf In-Memory-Datensätze erfolgt wesentlich schneller als deren Aufrufen von der Festplatte, sodass die Performance deutlich steigt.

### **Innovation**

Bei SAP bedeutet Innovation, dass unser Geist neugierig ist. Wir blicken nach vorne, wir akzeptieren nie den Status quo, und wir suchen immer nach Lösungen, die heute und in der Zukunft Bestand haben. Als Innovator wird SAP Unternehmen durch neue Technologien einen schnelleren Mehrwert bieten.

---

## K

### **Kennzahl**

Leistungskennzahl, für die Schwellenwerte definiert werden. Diese werden bei der Validierung geprüft.

### **Komponente**

Modulare Software mit Funktionen, auf die über Schnittstellen zugegriffen werden kann

---

## L

### **Lösung**

SAP-Lösungen ermöglichen es einem Kunden, eine geschäftliche Herausforderung zu bewältigen oder eine Geschäftsmöglichkeit zu nutzen. Für den Aufbau einer Lösung werden SAP-Anwendungen oder andere SAP-Software flexibel miteinander kombiniert. Lösungen können Best-Practice-Prozesse beinhalten und durch Beratung und laufenden Support unterstützt werden. Weiterhin können sie um Anwendungen und Services von SAP-Partnern erweitert und ergänzt werden. Mit SAP-Lösungen können Kunden branchenspezifische Geschäftsprozesse abwickeln und betriebswirtschaftliche Aufgaben in einer Weise erfüllen, die ihren Anforderungen optimal gerecht wird.

### **Lösungsportfolio**

Allgemeine Anwendungen, branchenspezifische Anwendungen, Dienstleistungen (zum Beispiel Beratung) sowie Software zur Unterstützung bewährter Geschäftsverfahren der jeweiligen Branche. Die Lösungsportfolios der SAP decken die Anforderungen von Unternehmen in über 25 großen Branchen ab. Sie bieten Kunden die Möglichkeit, aus einzelnen dieser Produkte und Services SAP-Lösungen nach ihrem Bedarf zusammenzustellen. Alle Angebote innerhalb eines Portfolios können auch einzeln erworben werden.

---

## N

### **Nachhaltigkeit**

Bei SAP die ganzheitliche Steuerung wirtschaftlicher, sozialer und ökologischer Risiken und Chancen mit dem Ziel, die Wirtschaftlichkeit zu erhöhen. Dies umfasst unter anderem die Berücksichtigung sozialer und ökologischer Aspekte bei finanziellen Entscheidungen, um die Erträge zu steigern und Risiken zu mindern; die Verringerung der Umweltbelastung aufgrund von Verschmutzung und des Verbrauchs natürlicher Ressourcen; Gesundheits- und Arbeitsschutz für die Mitarbeiter und faire Bedingungen am Arbeitsplatz. SAP setzt sich dafür ein, die eigenen Geschäftsabläufe nachhaltiger zu gestalten und Softwarelösungen zu liefern, die Kunden ein nachhaltiges Wirtschaften ermöglichen.

---

## O

### **On Demand**

Modell der Softwarebereitstellung, bei dem ein Anbieter Kunden eine Anwendung als Service bereitstellt, die nach Bedarf genutzt werden kann. Dies erspart lokale IT-Ressourcen zur Verwaltung der Infrastruktur und senkt die betrieblichen Aufwendungen.

### **On Device**

Zugriff auf SAP-Anwendungen und Daten von jeder Art von Gerät (Desktop, Laptop, Mobiltelefon, Tablet-Computer, Sensor etc.) und von jeder Art von gängiger Anwendung unabhängig vom Zeitpunkt und Ort

### **On Premise**

Traditionelles Modell der Softwarebereitstellung, bei dem Unternehmen Softwarelizenzen erwerben und Anwendungen lokal implementieren

### **Open Source**

Konzept für die Entwicklung von Software, nach dem Entwickler eine virtuelle Gemeinschaft bilden und Aufgaben gemeinsam lösen. Jeder Entwickler hat das Recht, diese Software zu verändern. Zu den erfolgreichsten Open-Source-Entwicklungsprojekten zählt Linux, ein von SAP unterstütztes freies Betriebssystem.

### **Orchestrierung**

Aspekt der SAP-Produktstrategie, der die verschiedenen Elemente der On-Premise-, On-Demand- und On-Device-Lösungen der SAP kostengünstig und konsistent zusammenführt. Die Orchestrierung schafft auch die Voraussetzungen dafür, dass für alle SAP-Lösungen ein Stammdaten-, Geschäftsprozess- und einheitliches Lebenszyklusmanagement gewährleistet werden kann. SAP hebt sich dadurch vom Wettbewerb ab.

---

## P

### **Produkt**

Auslieferbare, für Kunden sichtbare, installierbare und erneuerbare Softwareeinheit

---

## R

### Release

SAP-Software mit einer Versionsnummer, einem bestimmten Auslieferungsdatum und klar definierten Wartungsphasen

### Roadmap

Produktzeitplan, mit dem unterschiedliche Ziele verfolgt werden. Er dient zum Beispiel der Kommunikation mit Kunden, Benutzern und anderen Interessenten und umfasst unter anderem die Zeitpunkte zukünftiger Produktreleases, die für diese Releases geplanten Funktionen und eine allgemeine Priorisierung der Funktionen. In manchen Fällen werden auch die Anforderungen an die Funktionen ausführlich beschrieben, damit bestehende Kunden und Interessenten Feedback zu den eigentlichen Funktionen und zur Produktausrichtung geben können.

---

## S

### SAP Best Practices

Pakete, die Unternehmen Methoden und Werkzeuge an die Hand geben, mit denen sie in zentralen und branchenspezifischen Bereichen bewährte Geschäftsverfahren anhand von SAP-Software umsetzen können. Verfahren, Dokumentation und Voreinstellungen sorgen für eine schnelle und zuverlässige Einführung und Amortisierung von Lösungen.

### SAP Business All-in-One

Umfassende, flexible Geschäftssoftware mit integrierten branchenspezifischen Best Practices. SAP-Business-All-in-One-Lösungen sind für mittelgroße Unternehmen mit bis zu 2.500 Mitarbeitern konzipiert, die eine integrierte Lösung suchen, um die Geschäftsprozesse in ihrem Sektor durchgängig abzudecken. Die Lösungen werden weltweit von einem Netzwerk aus über 1.100 Partnern vertrieben, das mehr als 700 branchenspezifische Lösungen in über 50 Ländern anbietet.

### SAP Business ByDesign

Flexible On-Demand-Software mit branchenübergreifenden Prozessen speziell für Unternehmen mit 100 bis 500 Mitarbeitern. Die Lösung bietet vorkonfigurierte Best-Practice-Prozesse für Finanzwesen, Kundenbeziehungsmanagement, Projektma-

nagement, Personalwirtschaft, Beschaffung und Lieferkette. Mit Feature Pack 2.6 steht eine offene Plattform zur Verfügung, die Partnern die weitere Anpassung der Software ermöglicht und zugleich SAP als Ausgangspunkt für die Entwicklung neuer bereichsspezifischer On-Demand-Lösungen dient. Die neue Version zeichnet sich durch eine verbesserte Benutzerfreundlichkeit aus und bietet Unterstützung für Mobilgeräte. Gleichzeitig ermöglicht sie die Integration der On-Demand-Lösungen von Niederlassungen in die zentralen Systeme eines Konzerns.

### SAP BusinessObjects Community

Community, die Teil des SAP Community Network ist und Entwicklern, Designern von Reports und Dashboards und IT-Spezialisten zahlreiche Ressourcen, Know-how und Möglichkeiten der Zusammenarbeit bietet, um erfolgreiche SAP-BusinessObjects-Lösungen zu entwickeln

### SAP-BusinessObjects-Portfolio

Breit gefächertes Portfolio von Werkzeugen und Anwendungen, mit deren Hilfe Mitarbeiter, Informationen und Geschäftsprozesse über Geschäftsnetzwerke hinweg verbunden werden und so die Unternehmensleistung optimiert werden kann. Das Portfolio umfasst Lösungen für Business Intelligence (BI), Enterprise Performance Management (EPM), Enterprise Information Management (IM) und Governance, Risk und Compliance (GRC) sowie analytische Anwendungen.

### SAP Business One

Anwendung, die speziell für kleinere Unternehmen mit bis zu 100 Mitarbeitern konzipiert wurde und alle Kernfunktionen eines Unternehmens wie Finanzwesen, Vertrieb, Kundenbetreuung, Einkauf, Bestandsführung, Analysen und operative Abläufe in einer einzigen Lösung zusammenfasst

### SAP Business Suite

Gesamtpaket integrierter Kernanwendungen, Branchenlösungen und Ergänzungen, die auf der Technologieplattform SAP NetWeaver aufbauen. Die Software unterstützt betriebliche Kernprozesse vom Einkauf über die Produktion, die Lagerhaltung und den Vertrieb bis hin zu allen administrativen Bereichen und der Kundenbetreuung.



---

### **SAP Co-Innovation Lab**

SAP-Standort, der ein heterogenes Rechenzentrum mit Hardware und Infrastruktursoftware von unterschiedlichen Anbietern betreibt. In einer IT-Umgebung, in der reale Bedingungen simuliert werden, können SAP, Kunden und Partner gemeinsam Innovationen schaffen und vorantreiben sowie neue Geschäftslösungen und Technologien präsentieren. Kunden und Partner können die Einrichtung besuchen, um sich die neuesten SAP- und Partnerlösungen unter Praxisbedingungen anzusehen. SAP Co-Innovation Labs befinden sich in São Paulo (Brasilien), Palo Alto (Kalifornien, USA), Tokio, Bangalore (Indien) und Walldorf.

### **SAP Community Network**

Onlineportal, das fast zwei Millionen Mitglieder aus über 200 Ländern die Möglichkeit bietet, Erfahrungen und Know-how auszutauschen, Geschäftsmöglichkeiten weiterzuverfolgen und voneinander zu lernen. Es umfasst verschiedene Communities, die Informationen und zuverlässige Ressourcen bereitstellen und gemeinsame Innovationen ermöglichen. Siehe SAP BusinessObjects Community, Business Process Expert Community, SAP Developer Network und SAP University Alliances Community

### **SAP-Crystal-Lösungen**

Integrierte, intuitive und erschwingliche Anwendungen für Reporting, Dashboards, Präsentationen und Ad-hoc-Analysen. Unternehmen jeder Größe verfügen damit über eine optimale Grundlage für ihre Entscheidungen. Sie bieten ihnen Einblick in alle Bereiche ihrer Geschäftstätigkeit und helfen ihnen dabei, ihre Leistung zu überprüfen, Wachstumschancen zu erkennen und ihr Unternehmen auf neue Art und Weise zu führen. Die Crystal-Lösungen von SAP umfassen neben der Crystal-Reports-Produktpalette die Softwareanwendungen SAP Crystal Presentation Design, SAP Crystal Dashboard Design, SAP Crystal Dashboard Viewing, SAP Crystal Interactive Analysis und die On-Demand-Lösung SAP Crystal Exploration.

### **SAP Custom Development**

SAP-Organisation, die eine breite Palette von Entwicklungsservices und kundenspezifische Lösungen bietet, die ganz auf den Bedarf des Kunden zugeschnitten werden. Zu den angebotenen Leistungen gehören die Erweiterung und der optimale Einsatz von SAP-Standardlösungen, der Aufbau völlig neuer und

innovativer Lösungen und die Migration von Altsystemen auf die Technologieplattform SAP NetWeaver. Die Organisation entwickelt auch kundenspezifische Enterprise Services, kundenspezifische zusammengesetzte Anwendungen und übernimmt die Wartung kundenspezifischer Entwicklungen.

### **SAP Customer Relationship Management (SAP CRM)**

Umfassende Anwendung für Mitarbeiter im Marketing, Vertrieb und Service, die sämtliche Kundeninformationen liefert, um Kunden effektiv zu betreuen und kundenbezogene Prozesse abzuwickeln. SAP CRM unterstützt Kundeninteraktionen über verschiedene Kanäle, unter anderem über Smartphones, das Internet und soziale Medien. Eine spezielle Kommunikationsinfrastruktur ermöglicht die Kommunikation mit anderen Nutzern unabhängig von Tageszeit und Standort. Die CRM-Anwendungen von SAP können sowohl vor Ort installiert als auch im On-Demand-Betrieb genutzt werden.

### **SAP Developer Network (SAP SDN)**

Online-Community, die Teil des SAP Community Network ist und Entwicklern, Analytikern, Beratern und Administratoren von SAP umfassende technische Inhalte und fundiertes Know-how zu SAP NetWeaver bietet

### **SAP EcoHub**

Onlinemarktplatz, der einen zentralen Überblick über SAP- und Partnerlösungen bietet und Kunden erlaubt, Feedback und Bewertungen zu Softwarelösungen abzugeben und Demos einzusehen. Der Marktplatz hilft Kunden, ergänzende Softwarelösungen für ihre SAP-Umgebung zu finden, zu bewerten und zu erwerben.

### **SAP Enterprise Support**

Services, die proaktiven Support zusätzlich zu sämtlichen Leistungen von SAP Standard Support bieten. Zu diesen proaktiven Supportleistungen zählen eine Reihe von Werkzeugen, Prozessen und Services, die kontinuierliche Verbesserungen, ein umfassendes Anwendungsmanagement für den gesamten Lebenszyklus, kontinuierliche Innovationen sowie die Optimierung von Prozessen und Gesamtbetriebskosten ermöglichen.

---

## **SAP ERP**

SAP-ERP-Anwendung, deren Ziel es ist, Geschäfts- und IT-Prozesse zu optimieren. Erreicht wird dies durch eine Reduzierung der IT-Komplexität, durch eine bessere Anpassungsfähigkeit und dadurch, dass Kunden eine höhere Wertschöpfung zu geringeren Kosten als bei herkömmlichen Produkten im Bereich Enterprise Resource Planning geboten wird. Die Anwendung unterstützt geschäftskritische, durchgängige Prozesse im Finanzwesen, im Vertrieb, in der Personalwirtschaft, Anlagenverwaltung, Beschaffung und in anderen zentralen Unternehmenseinheiten. Darüber hinaus bietet SAP ERP auch Funktionen für branchenspezifische Prozesse, die nach Bedarf über ein sogenanntes Switch Framework aktiviert werden können. Dadurch bleibt die Anwendung im Kern langfristig stabil und kann eine maximale Systemleistung erbringen.

## **SAP Financing**

Finanzierungsprogramm für SAP-Lösungen in Zusammenarbeit mit dem strategischen SAP-Partner Siemens Financial Services GmbH (SFS). Die Finanzierungsangebote richten sich in erster Linie an mittelständische Unternehmen. Je nach örtlichen Gegebenheiten haben diese die Möglichkeit, Lösungen zu leasen oder Finanzierungsdarlehen aufzunehmen.

## **SAP High-Performance Analytic Appliance (SAP HANA)**

Flexible, datenquellenunabhängige In-Memory-Software, die Unternehmen hilft, ihre Geschäftsabläufe zu analysieren, und dabei auf riesige Mengen detaillierter Bewegungs- und analytischer Daten aus praktisch jeder Datenquelle zugreift. Die Software bildet die Grundlage für innovative Anwendungen, die eine In-Memory-Datenbank und Berechnungs-Engine nutzen und Kunden ermöglichen, mithilfe von Echtzeitdaten komplexe Planungen, Prognosen und Simulationen vorzunehmen.

## **SAP-Lösungen für Nachhaltigkeit**

Lösungen, mit denen SAP Kunden auf der ganzen Welt bei der effizienten und verantwortungsvollen Verwaltung ihrer Ressourcen – und bei der Erreichung ihrer Nachhaltigkeitsziele hilft. Die Lösungen für nachhaltige Unternehmensführung unterstützen die Messung zentraler Leistungskennzahlen, Energie und CO<sub>2</sub>-Management sowie Prozesse im Umwelt-, Gesundheits- und Arbeitsschutz. Sie helfen Unternehmen bei der Optimierung ihres Energieverbrauchs sowie ihrer Treibhausgas-

emissionen und unterstützen sie bei ihren Maßnahmen für Produktsicherheit, Gesundheitsschutz und Leistungsmanagement im Bereich Nachhaltigkeit.

## **SAP Manufacturing**

Lösung für die Verwaltung von Fertigungsprozessen mit integrierter schlanker Fertigung und Six-Sigma-Prinzipien. Sie bietet Funktionen für Planung, Ausführung, Qualitätssicherung, Instandhaltung sowie Umwelt-, Gesundheits- und Arbeitsschutz.

## **SAP MaxAttention**

Supportangebot mit breitem Spektrum an maßgeschneiderten Services, die die individuellen Anforderungen eines Kunden und alle Phasen der SAP-Lösung abdecken und von einem technischen Qualitätsmanager vor Ort erbracht werden

## **SAP NetWeaver**

Technologieplattform, die Informationen und Geschäftsprozesse technologie- und unternehmensübergreifend verbindet. SAP NetWeaver unterstützt Internetstandards wie HTTP, XML und Webservices und bildet die Grundlage für die SAP Business Suite. Die Plattform umfasst zahlreiche modulare Middleware-Funktionen, mit denen IT-Abteilungen die vorhandene IT-Infrastruktur weiterentwickeln und geschäftskritische Prozesse kosteneffektiv ausführen können. Siehe Technologieplattform

## **SAP NetWeaver Business Warehouse (SAP NetWeaver BW)**

Komponente von SAP NetWeaver, die eine umfassende Sicht auf das Unternehmen ermöglicht und Werkzeuge für fundierte Entscheidungen, Prozessoptimierung und Erfolgsbewertung (zum Beispiel erfolgsentscheidende Faktoren und Benchmarks) bereitstellt. Vormalis unter dem Namen SAP NetWeaver Business Intelligence angeboten.

## **SAP NetWeaver Mobile**

Komponente von SAP NetWeaver mit einer plattformunabhängigen Laufzeitumgebung für mobile Lösungen, die einen zeit- und standortunabhängigen Online- und Offline-Zugriff auf Unternehmensdaten ermöglichen. Als technische Basis für mobile Unternehmenslösungen umfasst Version 7.1 ein Gateway, das auf der Data Orchestration Engine aufsetzt und eine offene Standardschnittstelle zur Engine bildet (siehe Projekt „Gateway“).

---

### **SAP NetWeaver Portal**

Komponente von SAP NetWeaver mit einer umfassenden Portalinfrastruktur und leistungsstarken Funktionen für das Wissensmanagement und die unternehmensübergreifende Zusammenarbeit. Die Portallösung beruht auf offenen Standards und Webservices und ist eng mit anderen Komponenten von SAP NetWeaver verknüpft, sodass sie auch heterogene IT-Landschaften unterstützt. Die Kompatibilität mit Java, J2EE und Microsoft .NET ist gewährleistet.

### **SAP NetWeaver Process Integration (SAP NetWeaver PI)**

Komponente von SAP NetWeaver, die die Kommunikation unterschiedlicher Versionen von SAP- und Drittsystemen verschiedener Anbieter über unterschiedliche Plattformen (zum Beispiel Java, ABAP) ermöglicht. Umfasst alle Funktionen für systemübergreifende Geschäftsprozesse, die vormals über SAP NetWeaver Exchange Infrastructure bereitgestellt wurden.

### **SAPPHIRE NOW**

Wichtiges Business- und Technologie-Event und größte Kundenkonferenz der SAP, die jedes Jahr an verschiedenen Orten rund um den Globus stattfindet. Die internationale Veranstaltung in den USA wird zeitgleich mit der jährlichen Konferenz der amerikanischen SAP-Anwendergruppe (ASUG) ausgerichtet. SAPPHIRE-NOW-Besucher erfahren aus erster Hand alles über neue Initiativen, Lösungen, Produkte und Services. Die Konferenz bietet ihnen auch die Gelegenheit, sich mit SAP-Kunden, -Partnern, Entscheidern und Branchenexperten über die neuesten Geschäftsstrategien und Best Practices auszutauschen und hilft ihnen somit, ihr Geschäftsergebnis auf allen Unternehmensebenen zu verbessern. Weitere Informationen finden Sie unter [www.sapphirenow.com](http://www.sapphirenow.com).

### **SAP Product Lifecycle Management (SAP PLM)**

Anwendung für die Verwaltung, Verfolgung und Steuerung sämtlicher Produktinformationen über den Lebenszyklus von Produkten und Anlagen, sowohl im eigenen Unternehmen als auch in der erweiterten Wertschöpfungskette. Da organisatorische Hindernisse dank SAP PLM abgebaut werden, entsteht im Produktentwicklungsprozess mehr Freiraum für Kreativität.

### **SAP R/3**

Betriebswirtschaftliche Software für Client/Server-Umgebungen, die die SAP 1992 auf den Markt brachte und die Komponenten für Personalwesen, Logistik, Finanzwesen, Vertrieb und andere Bereiche umfasste; Vorläufer von SAP ERP

### **SAP-Rapid-Deployment-Lösungen**

Softwarepakete, die in kürzester Zeit von SAP Consulting installiert werden. Dauer, Kosten und Umfang der Installation werden von SAP Consulting vorab genau festgelegt. Die Lösungen bieten vorkonfigurierte Software, Best Practices und klar definierte Implementierungsservices zu überschaubaren Kosten. Durch die schnelle Installation können Kunden innerhalb weniger Wochen von den wichtigsten Softwarefunktionen profitieren.

### **SAP Safeguarding**

Projektorientiertes Supportangebot, mit dem Kunden die technischen Risiken ihrer IT-Projekte steuern und die technische Stabilität von SAP-Lösungen gewährleisten können. Das gilt für Implementierung, Upgrades und den generellen Betrieb.

### **SAP Solution Manager**

Lösung für das Anwendungsmanagement, die Kunden eine bessere Verwaltung ihrer SAP- und Nicht-SAP-Anwendungen ermöglicht. Mit SAP Solution Manager können Kunden die Verwaltung ihrer gesamten Systemlandschaft zentralisieren, erweitern, automatisieren, verbessern und dadurch die Gesamtbetriebskosten reduzieren. Die Lösung umfasst Funktionen für die Überwachung von ABAP- und Java-Komponenten, Ursachenanalyse und Lösungsüberwachung.

### **SAP Standard Support**

Supportangebot, das Unterstützung bei technischen Problemen sowie der Wartung und Integrität von Systemen leistet. Dieses Basisangebot umfasst unter anderem Updates, Problemlösungen, Wissenstransfer und Qualitätsmanagement, damit IT-Landschaften auf dem neuesten Stand sind und deren Stabilität gesichert ist.

### **SAP Supplier Relationship Management (SAP SRM)**

Beschaffungsanwendung, die Unternehmen in allen Branchen hilft, ihre Beschaffung und Vertragsverwaltung zu zentralisieren und über verschiedene Kanäle mit Lieferanten zu interagieren. Der gesamte durchgängige Beschaffungsprozess wird beschleunigt und optimiert, denn mit SAP SRM können Unter-

---

nehmen Prozesse integrieren und eine strikte Vertragseinhaltung durchsetzen, was zu erheblichen Kosteneinsparungen führen kann.

### **SAP Supply Chain Management (SAP SCM)**

Anwendung, die Unternehmen eine bessere Anpassung ihrer Lieferprozesse an die dynamische Wettbewerbsumgebung von heute ermöglicht. Mit SAP SCM lassen sich klassische lineare Lieferketten in offene, anpassungs- und reaktionsfähige Logistiknetzwerke umwandeln. Die in diesem Netzwerk tätigen Unternehmen sind auf den Kundenbedarf ausgerichtet und können schneller und sensibler auf die Dynamik von Angebot und Nachfrage im globalen Umfeld reagieren.

### **SAP University Alliances Community**

Als Teil des Community-Netzwerks der SAP vernetzt diese Online-Community Universitäten und Studenten mit SAP-Anwendern, Partnern und firmeninternen Experten. Professoren und Lehrkräfte erhalten Zugriff auf aktuelle wirtschaftliche und technische Lehrinhalte im SAP-Kontext und können mit zahlreichen renommierten Fachleuten in Kontakt treten.

### **SAP User Group Executive Network (SUGEN)**

SAP initiierte 2007 ein Programm, über das alle Anwendergruppen Know-how und Erfahrungswerte austauschen können. Die Initiative hat zu fruchtbaren Diskussionen geführt, von denen letztlich das gesamte Umfeld der SAP profitiert. Die Dachorganisation SAP User Group Executive Network (SUGEN) vereinigt zwölf nationale SAP-Anwendergruppen, die gemeinsame Prioritäten und Handlungsbereiche festlegen, um eine gezielte Kommunikation zwischen der SAP und ihren Anwendervereinigungen auf globaler Ebene zu ermöglichen.

### **Serviceorientierte Architektur (SOA)**

Betriebswirtschaftlich ausgerichtete Softwarearchitektur, die ein hohes Maß an Flexibilität, Anpassungsfähigkeit, Offenheit und Kosteneffizienz im IT-Betrieb bietet. Eine SOA unterstützt die Entwicklung, Verknüpfung und Verteilung von Webservices im gesamten Unternehmen. Dies gibt Unternehmen die Möglichkeit, Softwarekomponenten flexibler wiederzuverwenden und somit schneller auf neue Geschäftsanforderungen zu reagieren.

### **Software as a Service (SaaS)**

Software, die buchstäblich „als Service“ angeboten wird. Die Softwareanwendungen werden über eine sichere Internetverbindung und einen regulären Webbrowser bereitgestellt und verwaltet. Für den Zugriff auf die Software fällt eine Subskriptionsgebühr an, die pro Benutzer zu einem Festpreis – in der Regel monatlich – abgerechnet wird. Zu zahlen ist nur die tatsächliche Nutzung der Anwendungen. Siehe Cloud Computing

### **Software und softwarebezogene Services (SSRS)**

SAP weist Erlöse in Software und softwarebezogenen Services aus, die Softwareerlöse, Wartungserlöse sowie Subskriptions- und sonstige softwarebezogene Serviceerlöse umfassen.

### **Sybase 365**

Interoperabilitätsservices, die die weltweite Nachrichtenübermittlung zwischen Mobilfunkbetreibern über inkompatible Netzwerke, Protokollstacks und Mobilfunkgeräte vereinfachen. Die Nachrichten werden über eine sichere Messaging-Plattform für Mobilfunkbetreiber übertragen. Dabei kommen moderne Funktionen für die Protokollkonvertierung, das Routing, Queuing und die Transkodierung zum Einsatz.

### **Sybase Replication Server**

Software, die Daten in Echtzeit bewegt und synchronisiert. Unternehmen können dadurch Daten, die isoliert in Anwendungen lagern, besser nutzen und Berichte erstellen, ohne dass die operativen Systeme beeinträchtigt werden. Administratoren haben die Möglichkeit, nach Ausfällen schnell zusätzliche Ablagen für die Wiederherstellung von Daten einzurichten und Daten über verschiedene Plattformen zu verteilen, zu konsolidieren und zu synchronisieren.

### **Sybase Unwired Platform**

Plattform für die Entwicklung und den Einsatz kundenspezifischer und standardisierter mobiler Unternehmensanwendungen. Softwareentwickler können einfach und schnell Anwendungen entwickeln, die Unternehmensdaten für Mitarbeiter mit mobilen Endgeräten zugänglich machen. Mit der Plattform lassen sich auch mobile Unternehmensanwendungen verwalten, die verschiedene Datenquellen im Backendsystem mit allen wesentlichen Gerätetypen verknüpfen.

---

## **Systemintegrator (SI)**

Anbieter für Systemintegration und zugehörige Beratung. Zahlreiche große Software- und Hardwareanbieter sowie Originalteilehersteller nutzen den klassischen Vertriebsweg über Systemintegratoren.

## **T**

---

### **Technologieplattform**

Technische Grundlage für eine betriebswirtschaftlich ausgerichtete Softwarearchitektur, die ein hohes Maß an Flexibilität, Anpassungsfähigkeit, Offenheit und Kosteneffizienz bietet. Sie ermöglicht es Unternehmen, flexibler auf neue Geschäftsbedingungen zu reagieren. Siehe SAP NetWeaver

## **U**

---

### **Umwälzende technologische Entwicklungen (Disruptive Technologie)**

Prozess, bei dem ein Produkt oder eine Dienstleistung zunächst in einfachen Anwendungen am unteren Ende des Marktes Fuß fasst und sich dann unaufhaltsam im Markt durchsetzt und schließlich etablierte Wettbewerber verdrängt. Von Clayton Christensen geprägter Begriff.

### **Upgrade**

Ersetzen einer Anwendungskomponente durch eine neuere Komponente derselben Anwendung

## **V**

---

### **Vertriebspartner**

Kategorie, die Systemhäuser, Software Solution Partner (vormals unabhängige Softwareanbieter oder Independent Software Vendors, ISVs) und Value-Added Distributors umfasst

## **W**

---

### **Wartung**

Support, der je nach Wartungsphase Support im Hinblick auf gesetzliche Änderungen, über SAP-Hinweise bereitgestellte Korrekturen, Support Packages, Support bei Problemen sowie Zugriff auf Informationen und Online-Servicekanäle umfasst

### **Wartungsstrategie**

Gruppe von Regeln, die die Länge und Konditionen der Wartung für SAP-Software Releases bestimmen. Die Regeln können sich im Detail je nach Art der Anwendung unterscheiden.

### **Webservice**

Technische Funktionen, die mithilfe von Web Services Description Language (WSDL) die kompatible Interaktion zwischen Maschinen über ein Netzwerk unterstützen. Häufig handelt es sich dabei um Web Application Programming Interfaces (APIs), die von einer konsumierenden Anwendung aufgerufen und ausgeführt werden können.

---

# Adressen

---

## KONZERNZENTRALE

### SAP AG

Dietmar-Hopp-Allee 16  
69190 Walldorf  
Deutschland

Tel. +49 6227 74 74 74  
Fax +49 6227 75 75 75  
E-Mail [info@sap.com](mailto:info@sap.com)  
Internet [www.sap.com](http://www.sap.com)

Die vollständigen Adressen der Landesgesellschaften und Vertriebspartner finden Sie im Internet unter [www.sap.com/contactsap/directory](http://www.sap.com/contactsap/directory).

Bei Fragen zu diesem Geschäftsbericht wenden Sie sich bitte an:

### Investor Relations

Europa und Asien:

Tel. +49 6227 74 15 51  
Fax +49 6227 74 08 05  
E-Mail [investor@sap.com](mailto:investor@sap.com)  
Internet [www.sap.de/investor](http://www.sap.de/investor)

Nord- und Südamerika:

Tel. +1 877 727 78 62  
Fax +1 212 653 96 02  
E-Mail [investor@sap.com](mailto:investor@sap.com)  
Internet [www.sap.com/investor](http://www.sap.com/investor)

### Presse

Tel. +49 6227 74 63 15  
Fax +49 6227 74 63 31  
E-Mail [press@sap.com](mailto:press@sap.com)  
Internet [www.sap.de/press](http://www.sap.de/press)

---

# Publikationen für unsere Aktionäre

---

Die folgenden gedruckten Publikationen können bei SAP Investor Relations angefordert werden:

- Geschäftsbericht des SAP-Konzerns (IFRS, deutsch, englisch)
- Jahresbericht Form 20-F (IFRS, nur englisch)
- Rechnungslegung der SAP AG (HGB, nur deutsch)
- Quartalsberichte (deutsch, englisch)
- Aktionärsmagazin SAP INVESTOR (nur deutsch)

Alle Dokumente sind auch im Internet unter [www.sap.de/investor](http://www.sap.de/investor) (deutsch) und unter [www.sap.com/investor](http://www.sap.com/investor) (englisch) verfügbar. Dort finden Sie auch die wichtigsten Finanztabellen im MS-Excel-Format und weitere Services für Aktionäre.

Der interaktive Geschäftsbericht des SAP-Konzerns in Deutsch und Englisch ist unter [www.sapannualreport.com](http://www.sapannualreport.com) zu finden.

Die interaktive Version des Aktionärsmagazins SAP INVESTOR in Deutsch und Englisch finden Sie unter [www.sap-investor.com](http://www.sap-investor.com).

Der interaktive Nachhaltigkeitsbericht der SAP ist unter [www.sapsustainabilityreport.com](http://www.sapsustainabilityreport.com) zu finden.

Umfangreiche Informationen zum Thema Corporate Governance haben wir unter [www.sap.de/corpogovernance](http://www.sap.de/corpogovernance) bereitgestellt. Dort finden Sie unter anderem:

- Satzung der SAP
- Entsprechenserklärung der SAP nach § 161 AktG zur Beachtung der Empfehlungen des Deutschen Corporate Governance Kodex
- Erklärung zur Unternehmensführung der SAP
- Geschäftsgrundsätze für Mitarbeiter (Code of Business Conduct)
- Informationen zu den Organen und Organmitgliedern
- Angaben zu meldepflichtigen Wertpapiergeschäften der Organmitglieder (Directors' Dealings)
- Einladungen und Abstimmungsergebnisse der Hauptversammlungen

---

# Finanzkalender

---

## 2011

### 18. März

Veröffentlichung des Geschäftsberichts  
für das Geschäftsjahr 2010

### 28. April

Vorläufige Zahlen zum ersten Quartal 2011

### 25. Mai

Hauptversammlung, Mannheim

### 26. Mai

Zahlung der Dividende

### 27. Juli

Vorläufige Zahlen zum zweiten Quartal 2011

### 26. Oktober

Vorläufige Zahlen zum dritten Quartal 2011

## 2012

### 25. Januar

Vorläufige Zahlen zum Geschäftsjahr 2011,  
Presse-, Analysten- und Telefonkonferenz

### 23. Mai

Hauptversammlung, Mannheim

### 24. Mai

Zahlung der Dividende



---

# Impressum

---

## VERANTWORTLICH

SAP AG  
Investor Relations

## KONZEPT UND REALISATION

Kuhn, Kammann & Kuhn GmbH, Köln

## FOTOGRAFIE

Wolfram Scheible, Stuttgart

## FOTOGRAFIE REFERENZKUNDEN UND TITEL

Titel/Umschlag: Corbis  
Seite 2–11: Getty Images

## DRUCK

ColorDruckLeimen GmbH, Leimen

## COPYRIGHT

©2011 SAP AG  
Dietmar-Hopp-Allee 16  
69190 Walldorf  
Deutschland

## WARENZEICHEN

SAP, R/3, SAP NetWeaver, Duet, PartnerEdge, ByDesign, SAP BusinessObjects Explorer, StreamWork und weitere im Text erwähnte SAP-Produkte und -Dienstleistungen sowie die entsprechenden Logos sind Marken oder eingetragene Marken der SAP AG in Deutschland und anderen Ländern.

Business Objects und das Business-Objects-Logo, BusinessObjects, Crystal Reports, Crystal Decisions, Web Intelligence, Xcelsius und andere im Text erwähnte Business-Objects-Produkte und Dienstleistungen sowie die entsprechenden Logos sind Marken oder eingetragene Marken der Business Objects Software Ltd. Business Objects ist ein Unternehmen der SAP AG.

Sybase und Adaptive Server, iAnywhere, Sybase 365, SQL Anywhere und weitere im Text erwähnte Sybase-Produkte und -Dienstleistungen sowie die entsprechenden Logos sind Marken oder eingetragene Marken der Sybase Inc. Sybase ist ein Unternehmen der SAP AG.

Alle anderen Namen von Produkten und Dienstleistungen sind Marken der jeweiligen Firmen. Die Angaben im Text sind unverbindlich und dienen lediglich zu Informationszwecken. Produkte können länderspezifische Unterschiede aufweisen.

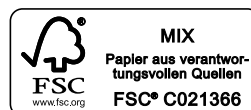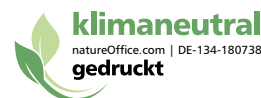

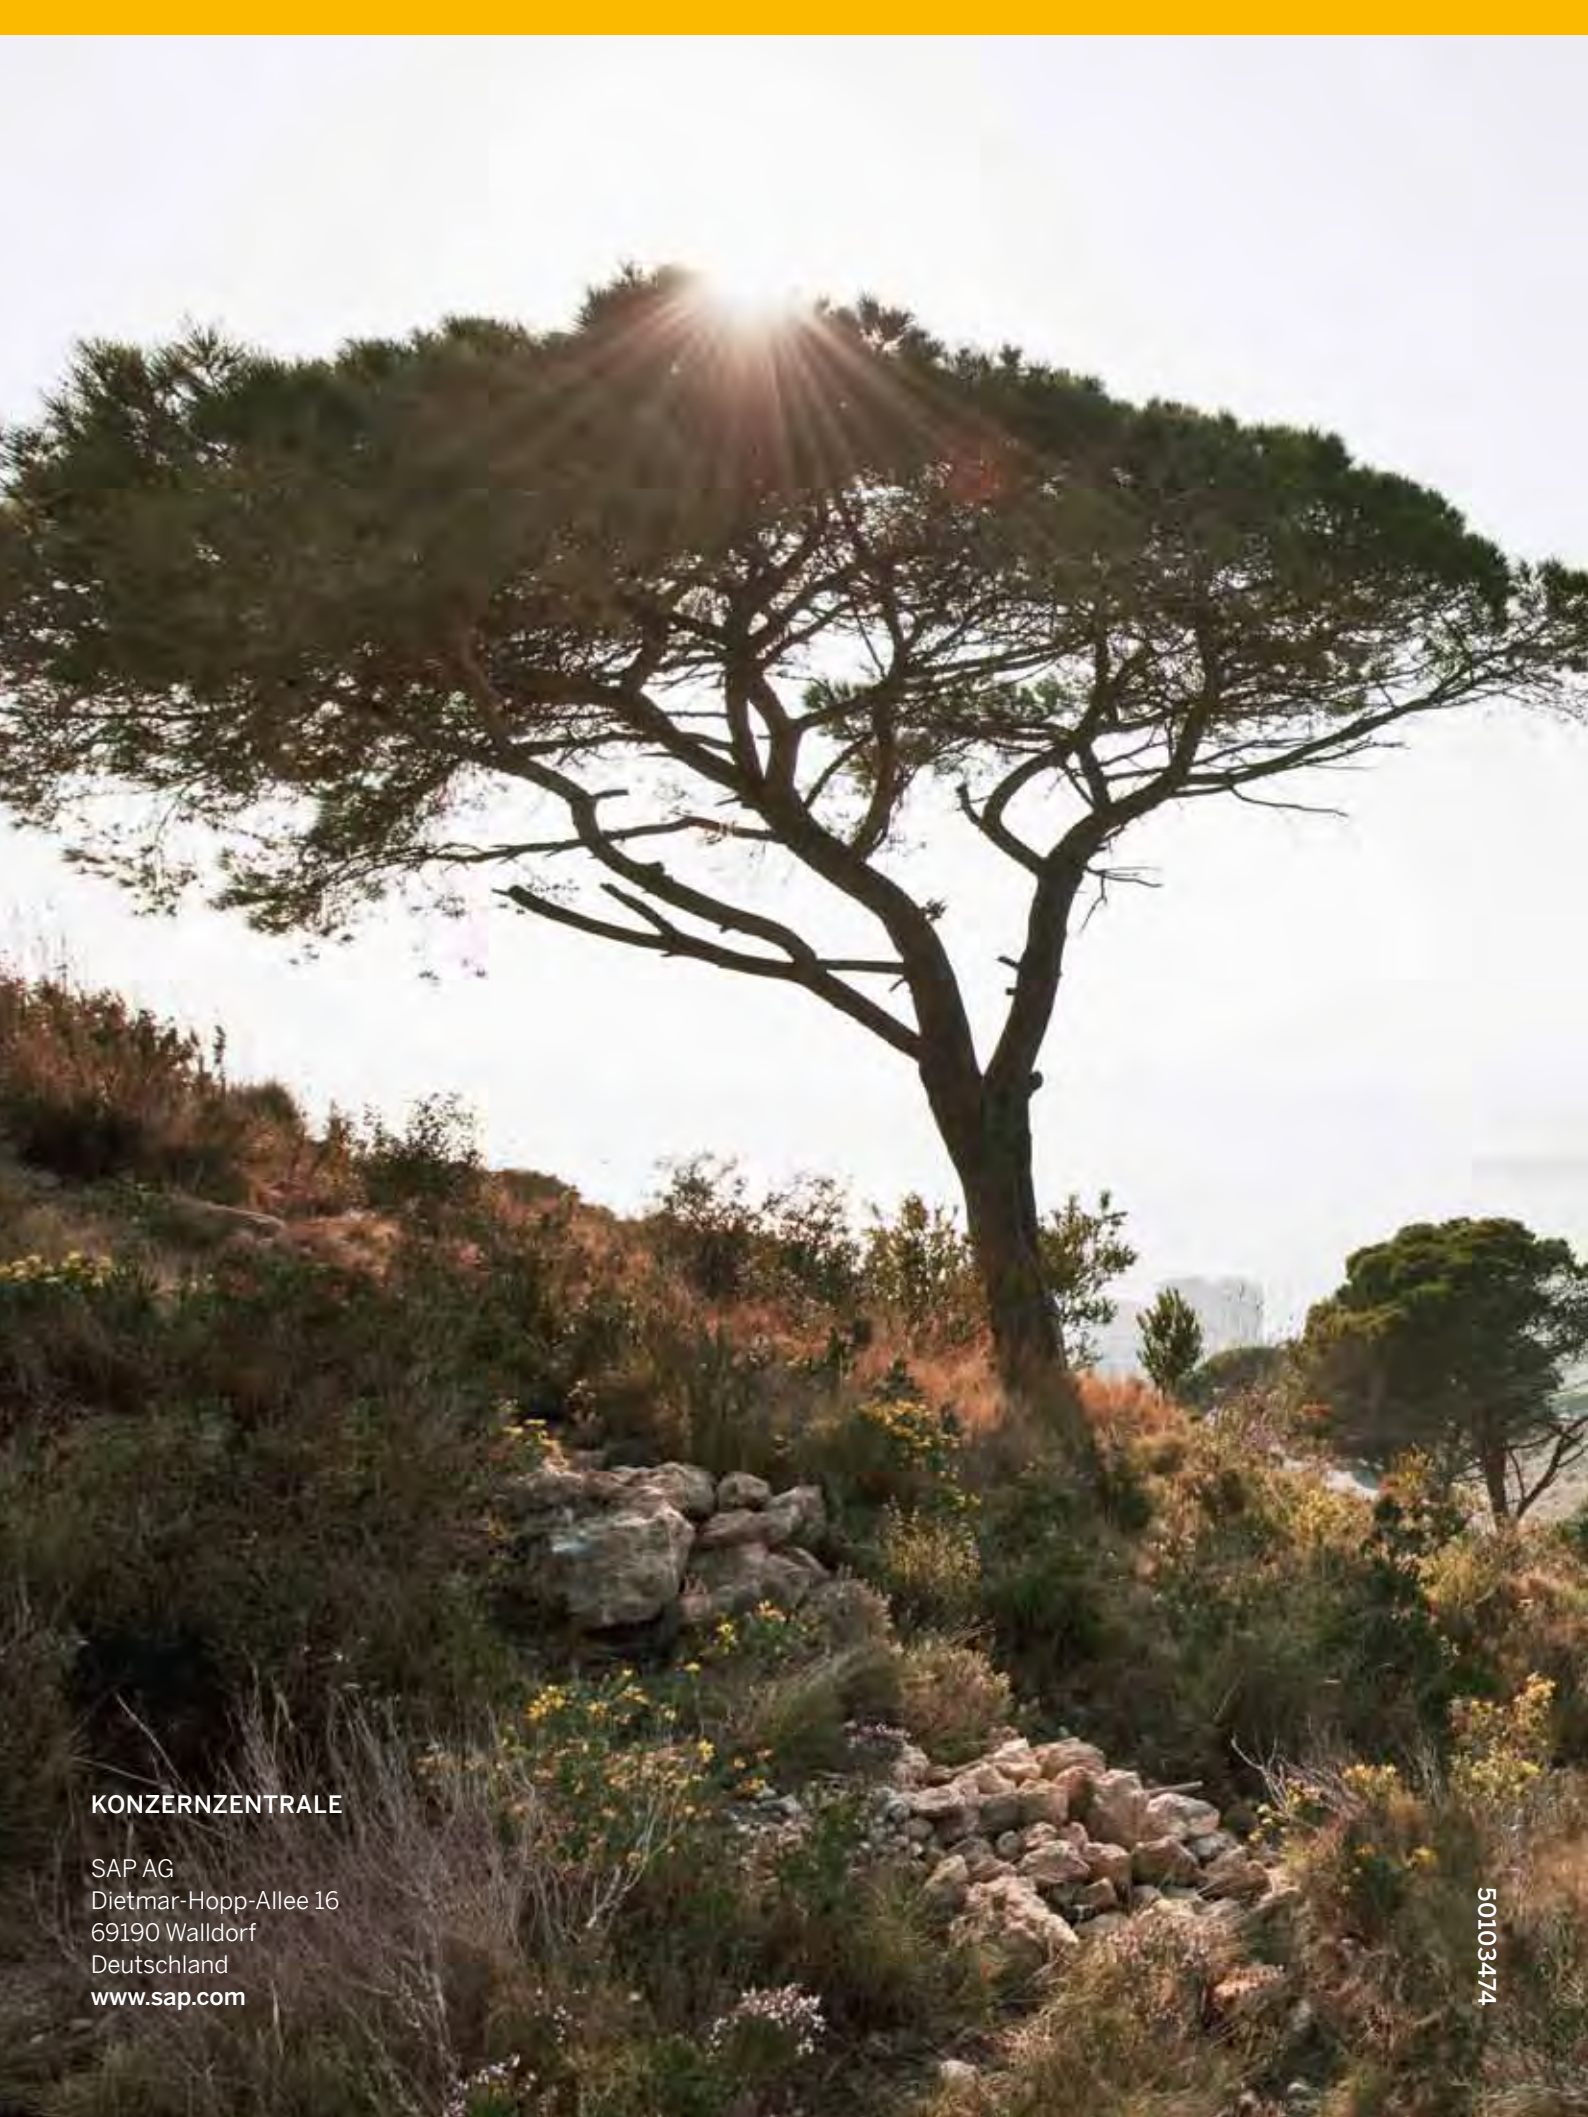

## KONZERNZENTRALE

SAP AG  
Dietmar-Hopp-Allee 16  
69190 Walldorf  
Deutschland  
[www.sap.com](http://www.sap.com)
