# Supplementary material
Source: publisher site journal article supplement (https://www.degruyterbrill.com/publication/isbn/9783110432879/downloadAsset/9783110432879_Elektronischer_Anhang_2.zip)
Supplement: Supplementary file 88 [file Siemens GB 2010.pdf › Korpustexte/Korpustexte pdf/Siemens/Siemens GB 2010.pdf]

The background of the page is an aerial photograph of a coastline. On the left, there is a large body of blue water with white foam from waves crashing against a rocky shore. On the right, a paved road curves along the edge of a green, vegetated cliffside. Overlaid on this image is a complex network of thin, black, geometric lines. These lines form various shapes, including triangles, hexagons, and zig-zag patterns, creating a technical or architectural aesthetic. The lines are scattered across the upper and middle portions of the page, with some forming larger, more intricate structures.

Unser Weg zur  
nachhaltigen Wertsteigerung

Geschäftsbericht 2010

[www.siemens.com](http://www.siemens.com)

**SIEMENS**

## Kennzahlen

| <b>Finanzielle Leistungsindikatoren</b> (in Mio. EUR, wenn nicht anders angegeben) | <b>GJ 2010</b>    | GJ 2009 |
|------------------------------------------------------------------------------------|-------------------|---------|
| Auftragseingang (fortgeführte Aktivitäten)                                         | 81.163            | 78.991  |
| Umsatz (fortgeführte Aktivitäten)                                                  | 75.978            | 76.651  |
| Ergebnis Summe Sektoren                                                            | 7.789             | 7.466   |
| Gewinn aus fortgeführten Aktivitäten                                               | 4.112             | 2.457   |
| Return on Capital Employed (ROCE) (fortgeführte Aktivitäten) <sup>1</sup>          | 10,4%             | 6,1%    |
| Kapitalstruktur <sup>2</sup>                                                       | 0,08              | 0,31    |
| Free Cash Flow (fortgeführte Aktivitäten)                                          | 7.111             | 3.786   |
| Dividende je Aktie (in EUR)                                                        | 2,70 <sup>5</sup> | 1,60    |

### **Mitarbeiter** (fortgeführte Aktivitäten)<sup>3</sup>

|                                                                 |     |     |
|-----------------------------------------------------------------|-----|-----|
| Anzahl der Mitarbeiter weltweit (in Tausend) <sup>3</sup>       | 405 | 405 |
| Anzahl der Mitarbeiter in Deutschland (in Tausend) <sup>3</sup> | 128 | 128 |

### **Forschung und Entwicklung**

|                                                                    |       |       |
|--------------------------------------------------------------------|-------|-------|
| Mitarbeiter in Forschung und Entwicklung (in Tausend) <sup>4</sup> | 30,1  | 31,8  |
| Aufwendungen für Forschung und Entwicklung (in Mio. EUR)           | 3.846 | 3.900 |
| Verhältnis von FuE-Aufwendungen zu Gesamtumsatz                    | 5,1%  | 5,1%  |
| Wesentliche Forschungsstandorte                                    | 178   | 176   |

### **Siemens-Umweltportfolio**

|                                                                                                                                                                     |      |      |
|---------------------------------------------------------------------------------------------------------------------------------------------------------------------|------|------|
| Mit dem Umweltportfolio erzielter Umsatz (in Mrd. EUR)                                                                                                              | 27,6 | 26,8 |
| Mit Produkten und Lösungen des Umweltportfolios erzielte jährliche Vermeidung von Treibhausgasemissionen gegenüber Beginn des GJ 2002 (in Mio. Tonnen Kohlendioxid) | 267  | 214  |

Einige der oben genannten Finanzkennzahlen sind oder können sogenannte Non-GAAP-Kennzahlen sein. Weitere Informationen finden Sie unter [www.siemens.com/nonGAAP](http://www.siemens.com/nonGAAP).

- 1 Geschäftsjahr 2010; darin enthalten –3,6 Prozentpunkte aufgrund Wertminderungen in Höhe von 1,204 Mrd. EUR (vor Steuern) bei Diagnostics und Belastungen in Höhe von 460 Mio. EUR (vor Steuern) in Verbindung mit der strategischen Neuausrichtung von Siemens IT Solutions and Services. Geschäftsjahr 2009; darin enthalten –4,6 Prozentpunkte aufgrund Wertminderung bei NSN in Höhe von 1,850 Mrd. EUR (vor Steuern).
- 2 Angepasste industrielle Nettoverschuldung/angepasstes EBITDA (fortgeführte Aktivitäten).
- 3 Zum 30. September 2010 und 2009.
- 4 Aus Vereinfachungsgründen wird der Begriff »Mitarbeiter« verwendet; er steht stellvertretend für Mitarbeiterinnen und Mitarbeiter.
- 5 Im Durchschnitt eingesetzte Mitarbeiter im Geschäftsjahr.
- 5 Vorschlag auf der Hauptversammlung.

# Inhalt Teil I

## Einleitung

---

- 4 Einführung
- 6 Vorstand der Siemens AG
- 8 Siemens-Unternehmensstrategie
- 9 Schaubild Unternehmensstrategie

## Fundament

---

- 15 Unsere Werte
- 16 Nachhaltigkeit als leitendes Prinzip
- 17 Führende Markt- und Technologiepositionen

## Aufstellung

---

- 27 Demografischer Wandel und Gesundheit
- 28 Urbanisierung und nachhaltige Entwicklung
- 28 Klimawandel und Energieversorgung
- 29 Globalisierung und Wettbewerbsfähigkeit
- 30 Starke Aufstellung

## Stoßrichtungen

---

- 41 Fokus auf innovationsgetriebene Wachstumsmärkte richten
- 43 Starker Partner unserer Kunden vor Ort sein
- 46 Die Kraft von Siemens nutzen

## One Siemens

---

- 57 Schaubild One Siemens
- 59 Zielsystem zur nachhaltigen Wertsteigerung
- 60 Fokusthemen

## Vision

---

- 65 Vorausdenken

18 **Reportage 1**  
Solarthermiekraftwerk Lebrija

32 **Reportage 2**  
SOMATOM Spirit

48 **Reportage 3**  
Elektromobilität

# Einleitung

---

Unternehmen, die erfolgreich sein und profitabel wachsen wollen, brauchen ein Fundament aus Werten, Kompetenz und Erfahrung. Dieses Fundament besteht aus der Geschichte des Unternehmens und der Menschen, die es prägen: Mitarbeitern, Aktionären und Kunden.

Bei Siemens steht Nachhaltigkeit im Zentrum dieses Selbstverständnisses. Nachhaltigkeit im Geist der Gründerfamilie, Nachhaltigkeit im Dienst von Kunden, Aktionären und der Gesellschaft.

Dieses Fundament gibt der Unternehmensstrategie ihre Verankerung und ist für mehr als 400.000 Mitarbeiterinnen und Mitarbeiter weltweit die Basis, mit ihrem Können Antworten auf die Herausforderungen unserer Zeit zu geben.

In unserem Geschäftsbericht möchten wir Ihnen anhand von drei ausgewählten Reportagen näherbringen, wie wir als Pionier den Herausforderungen unserer Zeit begegnen. Anhand des solarthermischen Kraftwerks Lebrija zeigen wir Ihnen exemplarisch, wie wir uns auf innovations- und technologiegetriebene Wachstumsmärkte konzentrieren. Diese Anlage wird schon bald 50 Megawatt Strom produzieren und damit rund 50.000 Haushalte mit CO<sub>2</sub>-freiem Strom versorgen können.



---

Shanghai ist die nächste Station. Begleiten Sie uns zu unserer hochmodernen Fertigung des Computertomographen SOMATOM Spirit in die chinesische Metropole. Erleben Sie zugleich bei einem unserer Kunden, wie dieser Computertomograph helfen kann, die medizinische Versorgung auch im ländlichen Raum zu verbessern – ein Beleg dafür, was es für uns bedeutet, weltweit lokal präsent zu sein und technischen Fortschritt für Menschen überall auf der Welt zugänglich zu machen.

Und wir laden Sie ein zu einer Fahrt mit einem Elektroauto. Wir treiben das Thema maßgeblich voran, weil wir über das reine Fahrzeug hinausdenken. Eine intelligente Stromversorgung, die umweltfreundlichen Strom auch über weite Strecken verlustarm in die Metropolen bringen kann. Ein innovatives Batteriekonzept, das aus dem Elektroauto einen Zwischenspeicher macht und so hilft, Stromschwankungen auszugleichen. Und schließlich ein Fahrzeug, das dank neuer Antriebskonzepte zu einer zukunftsfähigen Form von Mobilität beitragen wird.

So verstehen wir innovative Konzepte, die aus den Ideen und dem Wissen unserer Mitarbeiter entstehen und die Kraft des gesamten Unternehmens widerspiegeln: die Kraft und Stärke von Siemens. Sie sind Voraussetzung dafür, den Wettbewerb anzuführen und als Pionier Meilensteine für Fortschritt und Weiterentwicklung von Gesellschaften zu setzen.

# Vorstand der Siemens AG

Von links nach rechts:

**Siegfried Russwurm** Industry, Corporate Information Technology, Afrika, Naher und Mittlerer Osten

**Barbara Kux** Corporate Supply Chain Management, Corporate Sustainability, Global Shared Services

**Hermann Requardt** Healthcare, Corporate Technology

**Wolfgang Dehen** Energy, Asien, Australien

---

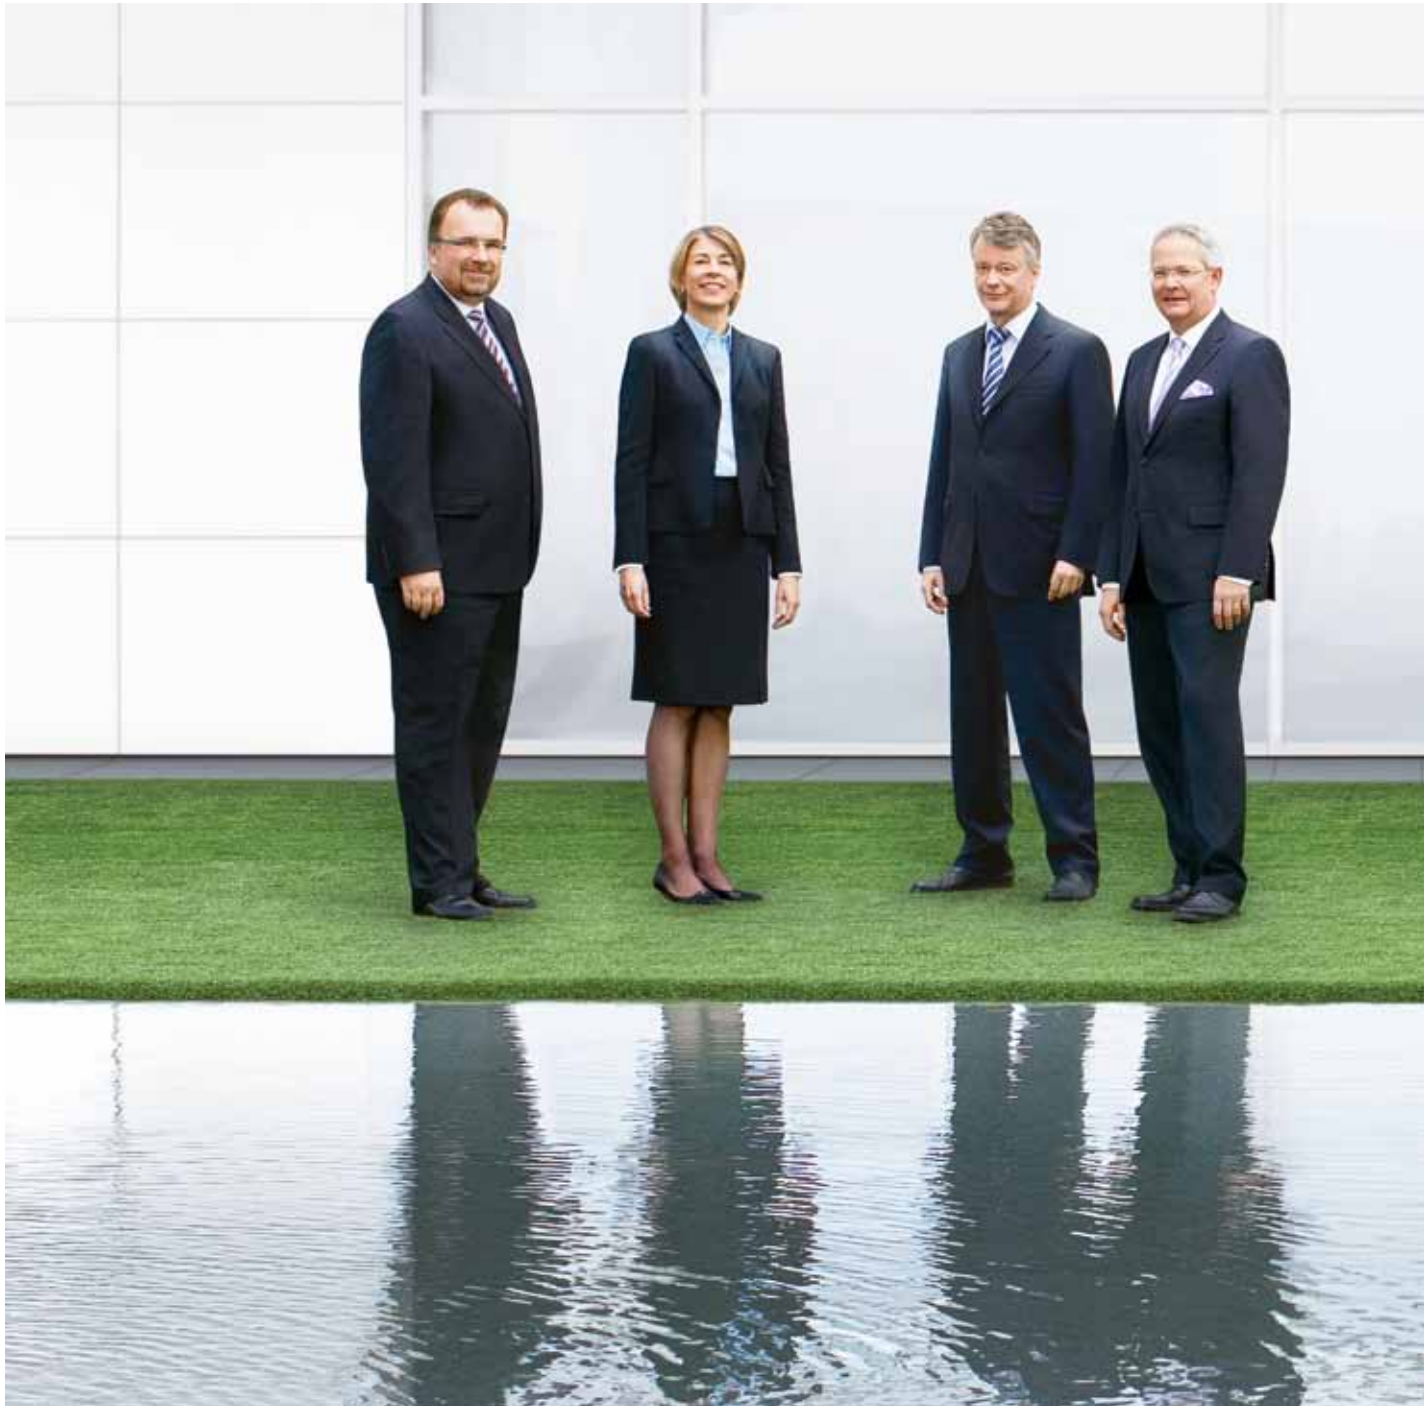

**Joe Kaeser** Corporate Finance and Controlling, Financial Services, Siemens IT Solutions and Services, Equity Investments, Siemens Real Estate  
**Peter Löscher – Vorsitzender** Corporate Communications and Government Affairs, Corporate Development  
**Peter Y. Solmssen** Corporate Legal and Compliance, Amerika  
**Brigitte Ederer** Corporate Human Resources, Europa, Gemeinschaft Unabhängiger Staaten

---

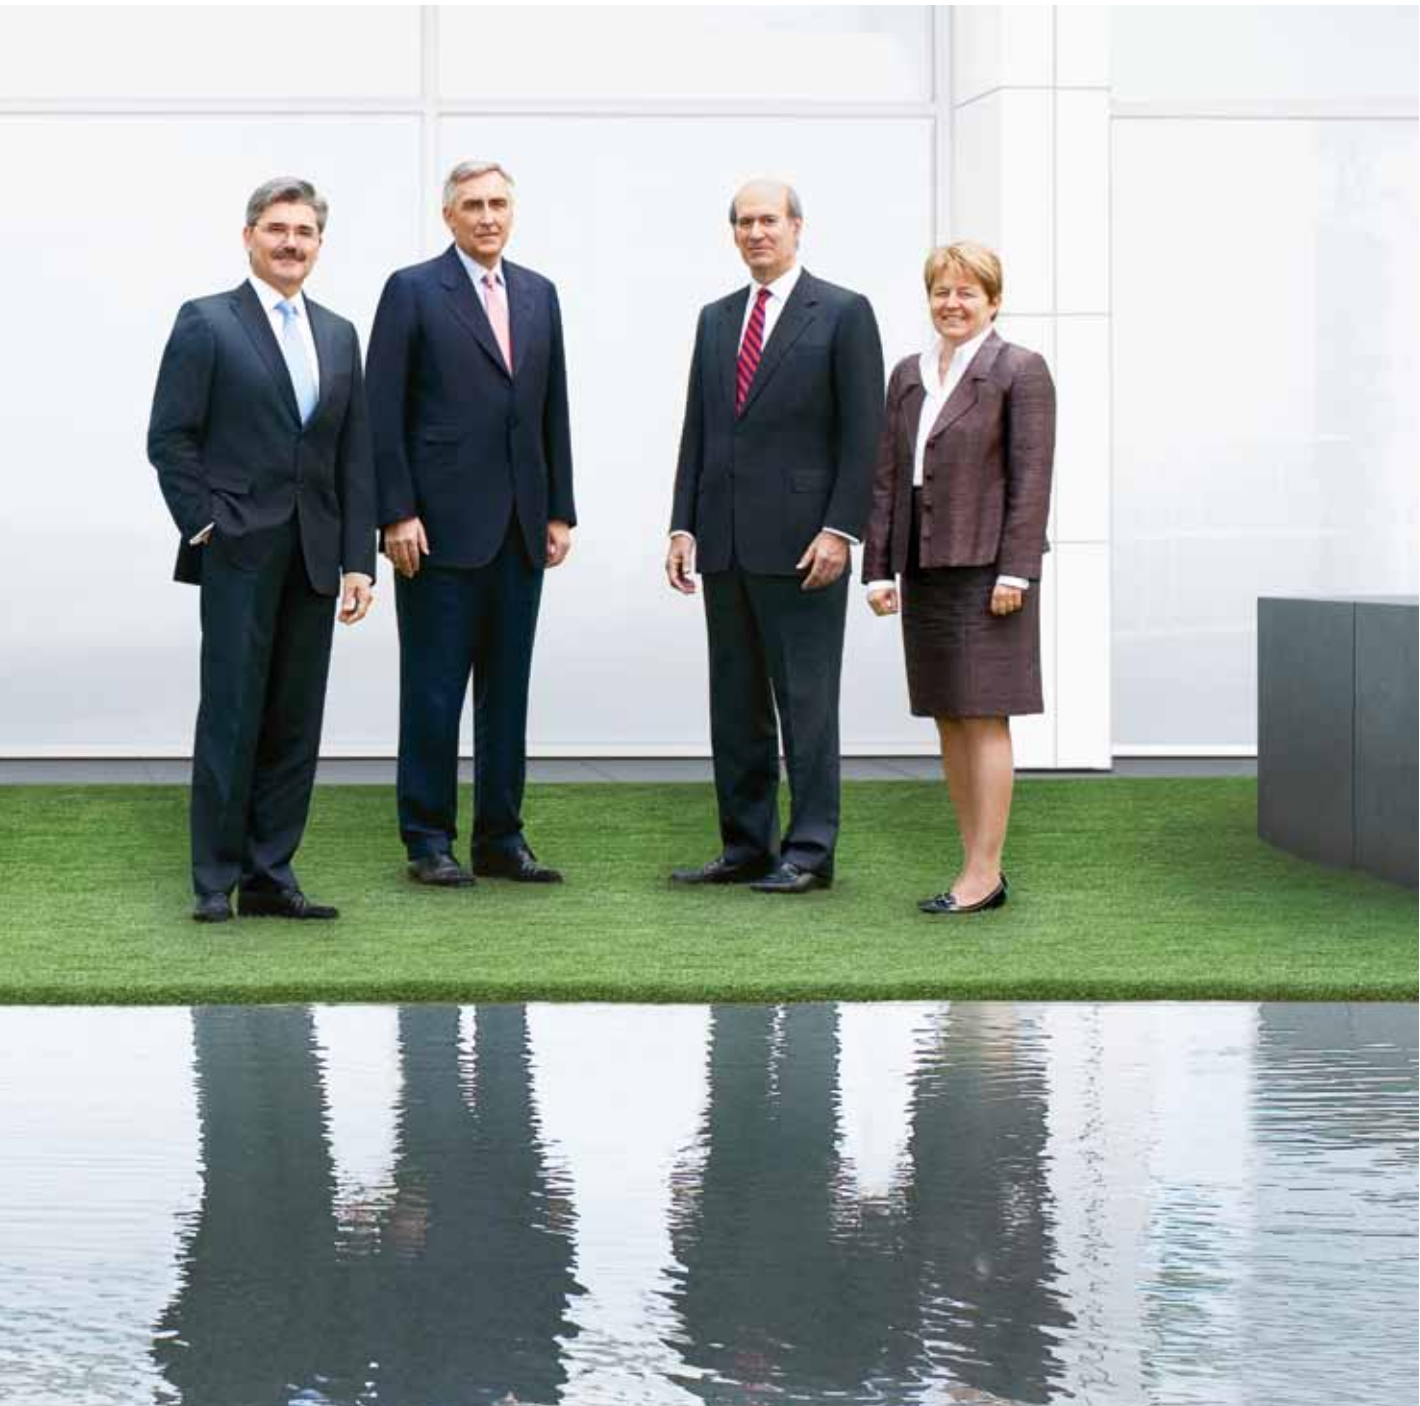

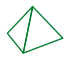

Verantwortungsvoll, exzellent und innovativ zu sein: Diese Ansprüche stellen wir an uns und unsere Arbeit. Hierbei lassen wir uns vom Prinzip der Nachhaltigkeit leiten – in ökologischer, wirtschaftlicher und gesellschaftlich-sozialer Hinsicht.

Siemens liefert der Welt Lösungen für die Herausforderungen der Megatrends demografischer Wandel, Urbanisierung, Klimawandel und Globalisierung. Die Potenziale dieser Megatrends an traditionellen und neuen Märkten zu erschließen – dazu haben wir unser Portfolio in drei Sektoren organisiert: Industry, Energy und Healthcare.

Wir sind in einer exzellenten Wettbewerbsposition. In einer Vielzahl unserer Geschäfte nehmen wir eine führende Markt- und Technologiestellung ein. Diese exzellente Wettbewerbsposition wollen wir nicht nur halten, sondern ausbauen. Dazu

- > richten wir unseren Fokus auf innovations- und technologiegetriebene Wachstumsmärkte;
- > stärken wir gezielt unsere weltweite Präsenz und sind so ein starker Partner unserer Kunden vor Ort;
- > nutzen wir gemeinsam die Kraft von Siemens und verbessern so weiter unsere Wettbewerbsführerschaft.



---

»One Siemens« ist unser Zielsystem für die nachhaltige Weiterentwicklung des Unternehmens und kapitaleffizientes Wachstum. Fokusthemen beschreiben Handlungsfelder für die kommenden Jahre. Dahinter steht der Anspruch, uns kontinuierlich gegenüber Markt und Wettbewerbern zu verbessern und den Unternehmenswert nachhaltig zu steigern.

Wir wollen das Potenzial des integrierten Technologiekonzerns voll ausschöpfen – beispielsweise indem wir unser Umweltportfolio und den damit erwirtschafteten Gewinn stetig ausbauen, unser hoch diversifiziertes Servicegeschäft beständig erweitern und unsere Position an den rasant wachsenden Märkten der Schwellenländer kontinuierlich stärken.

Unsere unternehmerische Vision bündelt diese strategischen Leitlinien: Als Pionier der Elektrotechnik haben wir die Industrialisierung maßgeblich beeinflusst, als Pionier ist dieses Unternehmen groß geworden. Und wir gehen weiter voran: auf Gebieten, die die Themen Energieeffizienz, industrielle Produktivität, bezahlbare und personalisierte Gesundheitssysteme sowie intelligente Infrastrukturlösungen betreffen. Dort werden wir auch künftig Pionier sein.

## ▷ Fundament

---

Siemens verfügt über ein starkes Fundament: Unsere Werte, Nachhaltigkeit als leitendes Prinzip sowie eine führende Position bei Technologien und an Märkten zeichnen es aus. Erfahren Sie hierzu mehr auf den Seiten 14 bis 17.

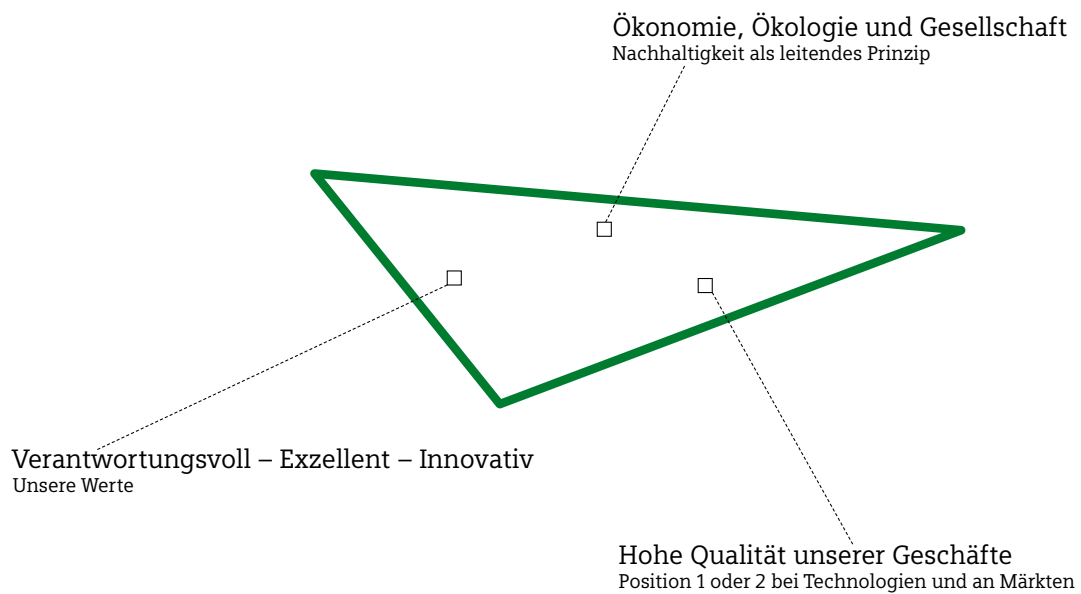

## Aufstellung

---

Die Welt steht vor großen Herausforderungen: Demografischer Wandel, Urbanisierung, Klimawandel und Globalisierung verlangen nach tragfähigen Antworten. Siemens hat frühzeitig die strategischen Konsequenzen daraus gezogen und sein Portfolio konsequent auf die Megatrends ausgerichtet. Wie? Lesen Sie weiter auf den Seiten 26 bis 31.

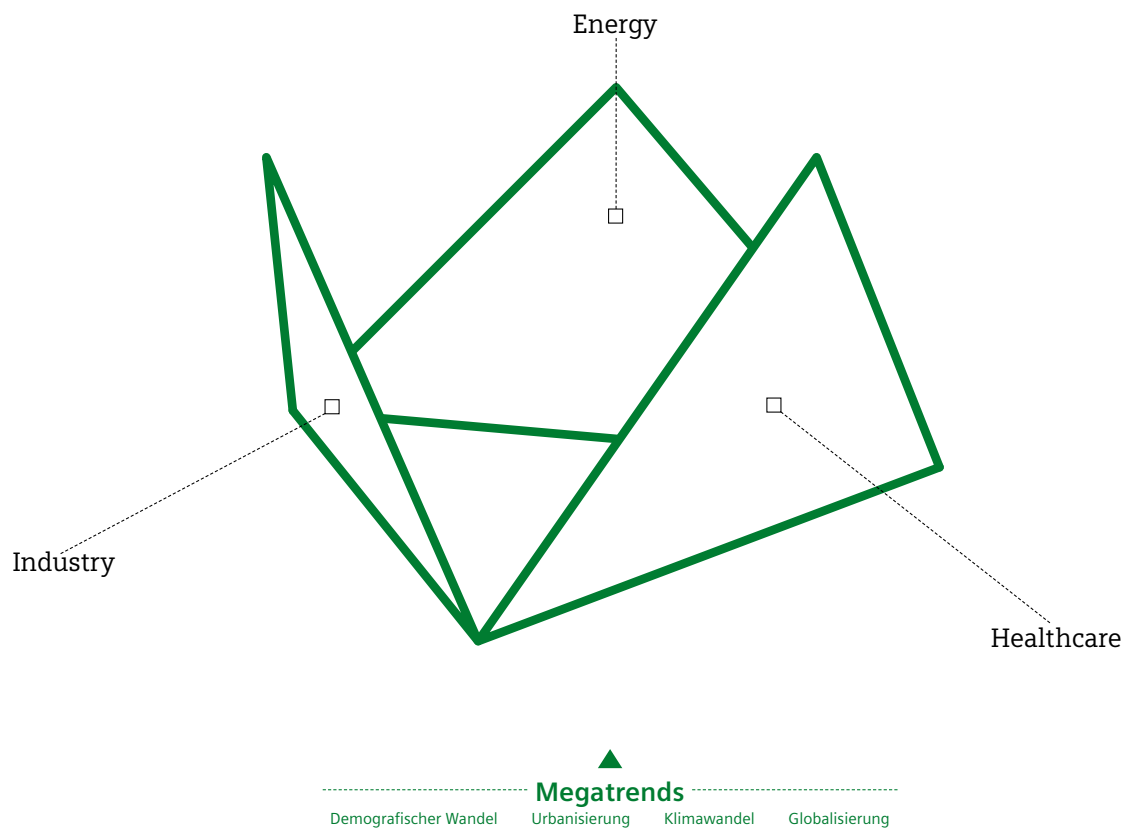

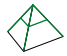

## Stoßrichtungen

Eine starke Aufstellung allein reicht nicht aus. Es bedarf einer stringenten, auf die Zukunft angelegten Strategie. Wir haben drei strategische Stoßrichtungen definiert. Ihre Konkretisierung finden sie in neun Fokusthemen. Ein finanzielles Zielsystem und der Anspruch auf kontinuierliche Verbesserung runden im Rahmen von One Siemens unsere strategische Ausrichtung ab. Was wir im Einzelnen tun, um die Kraft von Siemens voll auszuschöpfen, erfahren Sie auf den Seiten 40 bis 47 sowie 56 bis 63.

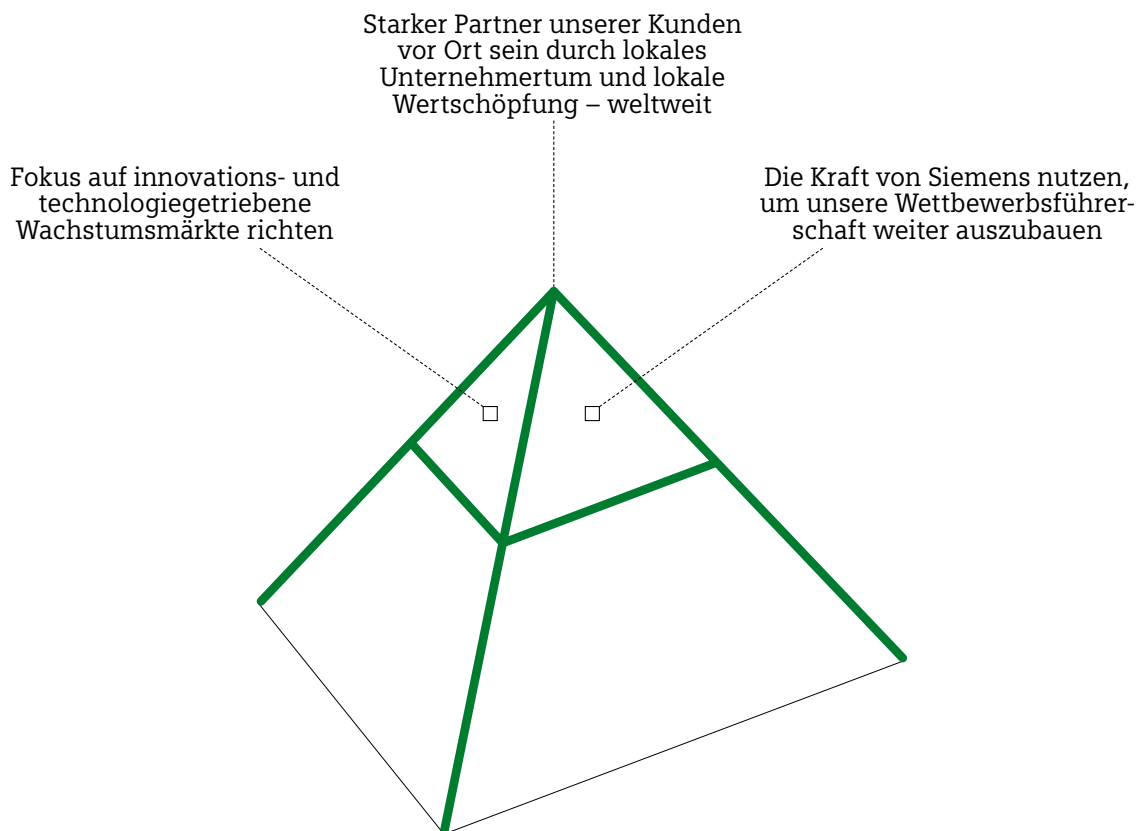



## Vision

---

Auf der Basis eines belastbaren Fundaments, einer starken Aufstellung und einer in die Zukunft weisenden Strategie arbeiten wir jeden Tag daran, unserer Vision einen Schritt näherzukommen. Sie bildet die Spitze unserer Strategiepyramide und gibt die Richtung für unser Handeln und Tun vor: Ein Pionier zu sein, das ist unser höchster Anspruch. Lesen Sie weiter auf den Seiten 64 f.

### Pionier in

Energieeffizienz  
industrieller Produktivität  
bezahlbaren und  
personalisierten  
Gesundheitssystemen  
intelligenten  
Infrastrukturlösungen

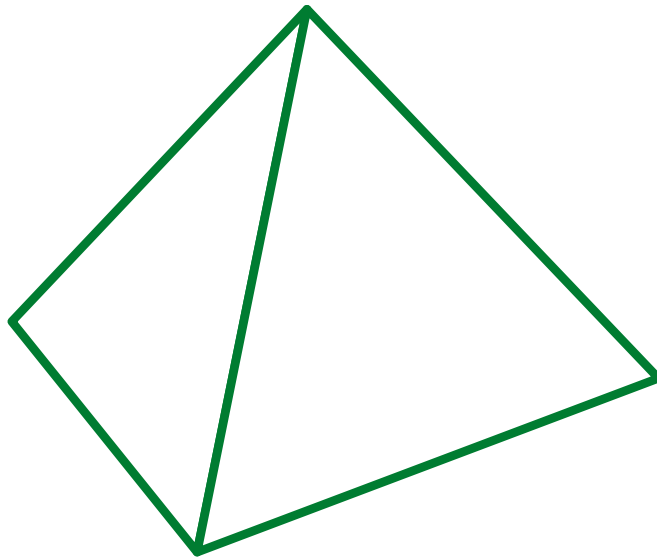

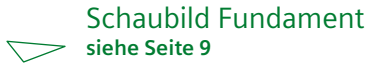

Innovative Konzepte und visionäre Ideen, gepaart mit der unternehmerischen Weitsicht, auch Risiken einzugehen, um dauerhaft erfolgreich zu sein – diese Einstellung unseres Firmengründers Werner von Siemens hat uns zu einem erfolgreichen internationalen Anbieter von zukunftsweisenden Spitzentechnologien gemacht. Werner von Siemens war zu seiner Zeit ein Pionier auf dem Gebiet der Elektrotechnik. Und unser Unternehmen ist in diesem Geist groß und erfolgreich geworden. Diesen Weg gehen wir konsequent weiter.

Damals wie heute gehört hierzu ein starkes Fundament, eine Basis, auf der wir aufbauen können. Unsere Werte, Nachhaltigkeit als leitendes Prinzip und unser Anspruch, überall auf der Welt führende Markt- und Technologiepositionen einzunehmen, zeichnen es aus.

»Unsere Tradition und unser Erbe sind eine  
**Quelle der Inspiration** für die Zukunft.«

Nathalie von Siemens, Ur-Urenkelin des Firmengründers

[www.siemens.com/werte](http://www.siemens.com/werte)

## Unsere Werte

Ideen, Erfindungen, Patente – seit Gründung der »Telegraphen-Bauanstalt von Siemens & Halske« im Jahr 1847 prägen technische Innovationen und Spitzenleistungen den Erfolg unserer Marke. Als Pionier der Elektrotechnik haben wir die Industrialisierung maßgeblich beeinflusst, als Pionier ist dieses Unternehmen groß geworden. Bis heute beflügelt uns der Pioniergeist unserer Mitarbeiter. Ihre Antworten auf die großen Herausforderungen der Zeit haben uns zu einem der international führenden Technologiekonzerne gemacht. Den Rahmen für unser profitables, nachhaltiges und dauerhaftes Wachstum geben unser Wertesystem und unsere Strategie vor. Sie bilden die Leitlinien für das Handeln aller Mitarbeiter. Zum Fundament der Strategiepyramide von Siemens gehören unsere unternehmerischen Werte.

**Wir handeln verantwortungsvoll.** Verantwortung übernehmen wir gegenüber unseren Kunden, für die wir ein verlässlicher Partner sind. Verantwortung übernehmen wir als »guter Unternehmensbürger« in den Gesellschaften, in denen wir weltweit tätig sind. Verantwortung haben wir auch für unsere Mitarbeiter, für die wir dauerhaft ein attraktiver Arbeitgeber sein wollen. Und schließlich tragen wir Verantwortung für unsere Aktionäre, indem wir den Wert unseres Unternehmens nachhaltig steigern. Unser Unternehmen führen wir nach höchsten professionellen und ethischen Standards und verlangen dies auch von unseren Geschäftspartnern, Lieferanten und Interessenvertretern.

**Wir handeln exzellent.** Unsere Basis sind ehrgeizige Ziele, die wir von unserer Vision ableiten und anhand von Benchmarks verifizieren. Wir unterstützen unsere Kunden bei der Suche nach perfekter Qualität und bieten ihnen Lösungen, die ihre Erwartungen übertreffen. Wir sind exzellent, indem wir einen Weg der kontinuierlichen Verbesserung definieren und bestehende Prozesse permanent hinterfragen. Wir reagieren schnell, wenn sich neue Geschäftsmöglichkeiten eröffnen. Exzellenz bedeutet auch, für die besten Köpfe am Markt attraktiv zu sein. Wir vermitteln exzellente Qualifikationen und bieten beste Arbeitsbedingungen, um Höchstleistungen zu erbringen.

**Wir handeln innovativ.** Unsere Mitarbeiter haben mit ihren Erfindungen und Ideen die Welt verändert. Wir führen damit konsequent unsere mehr als 160-jährige Unternehmens- und Innovationsgeschichte fort. Forschungs- und Entwicklungsaktivitäten richten sich eng an unserer Geschäftsstrategie aus. Wir wollen in allen Geschäftsfeldern die maßgeblichen Trends setzen und streben bei etablierten wie neuen Technologien eine führende Marktposition an. Mit der Energie und Kreativität unserer Mitarbeiter gehen wir neue und ungewohnte Wege. Dabei handeln wir stets unternehmerisch und messen den Erfolg unserer Innovationen am nachhaltigen Erfolg unserer Kunden.

[www.siemens.com/werte](http://www.siemens.com/werte)

Siemens-Nachhaltigkeitsprogramm

Geschäftschancen      Wir tun, was wir sagen      Dialog mit Interessengruppen

# Nachhaltigkeit – unser leitendes Prinzip

[www.siemens.com/nachhaltigkeit](http://www.siemens.com/nachhaltigkeit)

## Nachhaltigkeit als leitendes Prinzip

Unser Nachhaltigkeitsverständnis ist eng mit unserer Unternehmensgeschichte verbunden und basiert auf unseren Werten. Verantwortungsvoll mit Mitarbeitern, unserem gesellschaftlichen Umfeld und mit natürlichen Ressourcen umzugehen: Diesen Auftrag hat uns Werner von Siemens bereits vor rund 125 Jahren ins Stammbuch geschrieben. Seinem Credo – »Für einen kurzfristigen Gewinn verkaufe ich nicht die Zukunft des Unternehmens« – fühlen wir uns verpflichtet. Exzellent zu sein und an den Märkten der Zukunft führende Positionen einzunehmen; innovativ auf technologischem Gebiet an der Zukunft der modernen Zivilisation mitzuarbeiten – all dies war und bleibt für uns Anspruch und Herausforderung.

Und deshalb lassen wir uns bei unseren Aktivitäten und Entscheidungen vom Prinzip der Nachhaltigkeit leiten: Wir agieren auf ökologischer, ökonomischer und gesellschaftlich-sozialer Ebene verantwortungsvoll im Sinne künftiger Generationen. Unser Anspruch ist es, eine Balance zwischen ökologischen, ökonomischen und gesellschaftlichen Zielen zu erreichen. In ökologischer Hinsicht verbessern wir durch innovative Produkte und Lösungen unsere eigene Umweltbilanz und die unserer Kunden. In ökonomischer Hinsicht setzen wir auf langfristige Wertschöpfung mit innovativen Produkten und Lösungen. Und in gesellschaftlich-sozialer Hinsicht fördern wir unsere Mitarbeiter und engagieren uns für unser Umfeld. Außerdem tragen wir

als einer der weltweit größten Anbieter im Gesundheitswesen zur medizinischen Versorgung der Menschheit bei – und dies über die gesamte Versorgungskette hinweg. Unsere Infrastrukturlösungen bei den Themenfeldern Mobilität, Energieversorgung und Wasser leisten zudem in vielen Regionen einen wesentlichen Beitrag zur Verbesserung der Lebensbedingungen der Menschen. Unser Nachhaltigkeitsprogramm mit seinen drei zentralen Themenfeldern sichert diese Ziele:

### GESCHÄFTSCHANCEN

Wir haben unser ursprüngliches Ziel, mit dem Umweltportfolio im Jahr 2011 einen Umsatz von 25 Milliarden Euro zu erreichen, bereits deutlich schneller erreicht als geplant (erzielter Umsatz im Geschäftsjahr 2010: rund 28 Milliarden Euro). Wir haben uns vorgenommen, diesen jährlichen Umsatz bis Ende 2014 auf über 40 Milliarden Euro zu steigern. Die bei unseren Kunden installierten Produkte und Systeme aus unserem Umweltportfolio haben der Umwelt im Geschäftsjahr 2010 267 Millionen Tonnen CO<sub>2</sub> erspart. Diese Einsparung entspricht der jährlichen CO<sub>2</sub>-Emission von 80 Millionen Fahrzeugen der Golf-Klasse mit durchschnittlich 20.000 Kilometern Fahrleistung. Wir werden »grüne« Innovationen fördern und das Umweltportfolio konsequent weiterentwickeln. Unser Engagement und unser Erfolg auf diesem Gebiet versetzen uns schon heute in die Lage, als integrierter Technologiekonzern mit innovativen Produkten und Lösungen zu einer Gesellschaft beizutragen, die das Prädikat »Low Carbon Society« – also klimafreundlich und umweltbewusst zu sein – verdient.



»Wer das Beste liefert, bleibt schließlich oben,  
und ich ziehe immer die Reklame durch Leistungen der durch Worte vor.«

Werner von Siemens, 18. Januar 1876

---

## WIR TUN, WAS WIR SAGEN

Wir implementieren Nachhaltigkeitskennzahlen für alle relevanten Bereiche und steuern deren Umsetzung. Ein gutes Beispiel hierfür ist unser Umweltprogramm: Mit ihm verfolgen wir das Ziel, die CO<sub>2</sub>-Effizienz (Emissionen relativ zum Umsatz) von Siemens um 20 Prozent bis Ende des Geschäftsjahrs 2011 im Vergleich zum Basisjahr 2006 zu verbessern. Bis Ende 2012 werden wir dazu bis zu 100 Millionen Euro investieren, um unsere Werke noch »grüner« zu machen. Und wir sind schon eifrig dabei: Im Rahmen unseres Energieeffizienzprogramms haben wir in rund 100 großen Werken sogenannte Energy Health Checks durchgeführt; gleichzeitig haben wir ein entsprechendes Programm für unsere Lieferanten gestartet, denn wir wollen das weltweit erste Industrieunternehmen mit einer durchgehend umweltfreundlichen Lieferkette sein. Bei der Effizienz des Wasserverbrauchs macht Siemens ebenfalls große Fortschritte. Auch hier wollen wir uns bis zum Geschäftsjahr 2011 gegenüber dem Basisjahr 2006 um 20 Prozent verbessern.

## DIALOG MIT INTERESSEGRUPPEN

Wir intensivieren den Austausch mit unseren Stakeholdern und die Zusammenarbeit mit relevanten Organisationen. Mit dem Siemens Sustainability Advisory Board unterstützt uns ein hochrangig besetztes Expertengremium darin, unsere Nachhaltigkeitsstrategie weiterzuentwickeln.

[www.siemens.com/nachhaltigkeit](http://www.siemens.com/nachhaltigkeit)

## Führende Markt- und Technologiepositionen

Wer nachhaltig wachsen will, darf nicht allein auf die schiere Größe vertrauen. Nur wer darüber hinaus auch technologisch wegweisend ist, wird auf Dauer sein Geschäft erfolgreich und profitabel ausbauen. Führende Positionen an den innovationsgetriebenen Wachstumsmärkten der Zukunft und bei den damit korrespondierenden Technologien – das sind die beiden Seiten ein und derselben Medaille, der Medaille des Erfolgs.

Unsere Innovationen machen uns stark: Bereits heute stammen ungefähr zwei Drittel unseres Umsatzes aus Geschäften, die eine Nummer-eins- oder Nummer-zwei-Marktposition ausweisen. Das ist eine gute Ausgangssituation. Hieran anknüpfend wollen wir die erreichten Positionen verteidigen beziehungsweise weiter ausbauen – ein Ansporn zu Höchstleistungen und zugleich Nachweis verantwortlichen unternehmerischen Handelns.

# Lebrija – erneuerbare Energie aus Solarthermie

Reportage 1

---

## Fokus auf innovationsgetriebene Wachstumsmärkte

In nicht einmal sechs Stunden empfangen die Wüsten der Erde so viel an Sonnenenergie, wie alle Menschen zusammen in einem Jahr benötigen.

Solarthermie hilft, diese Energie zu gewinnen, ohne dabei CO<sub>2</sub>-Emissionen zu erzeugen. Eine erste Anlage von Siemens speist ab 2011 Strom ins spanische Netz ein.

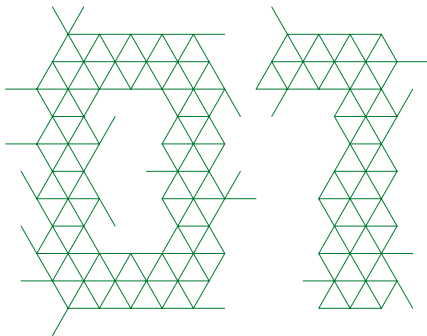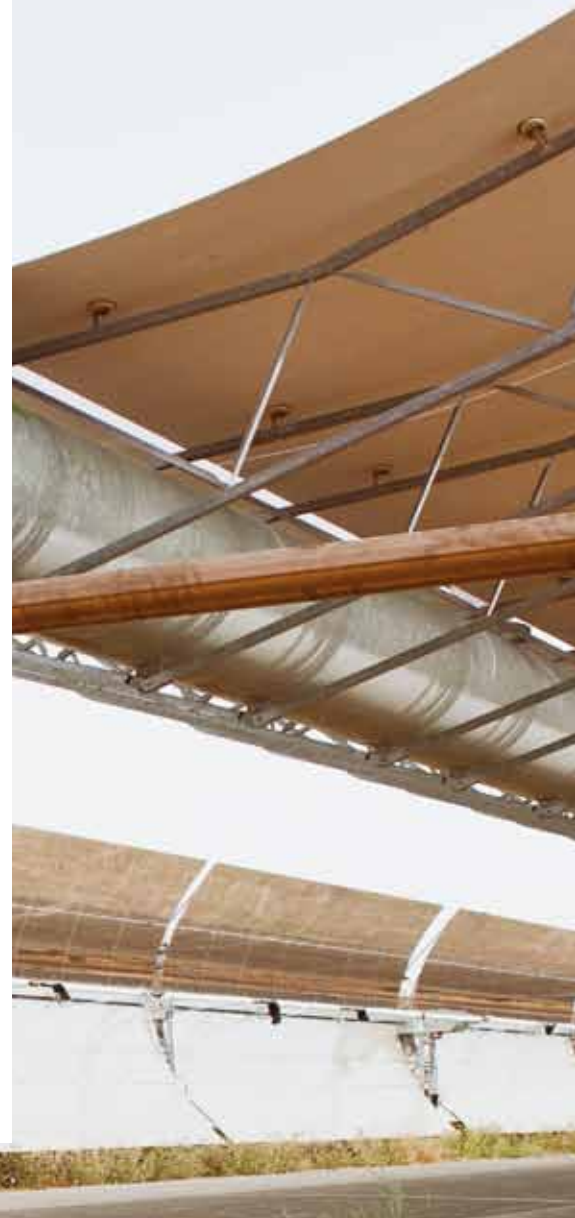

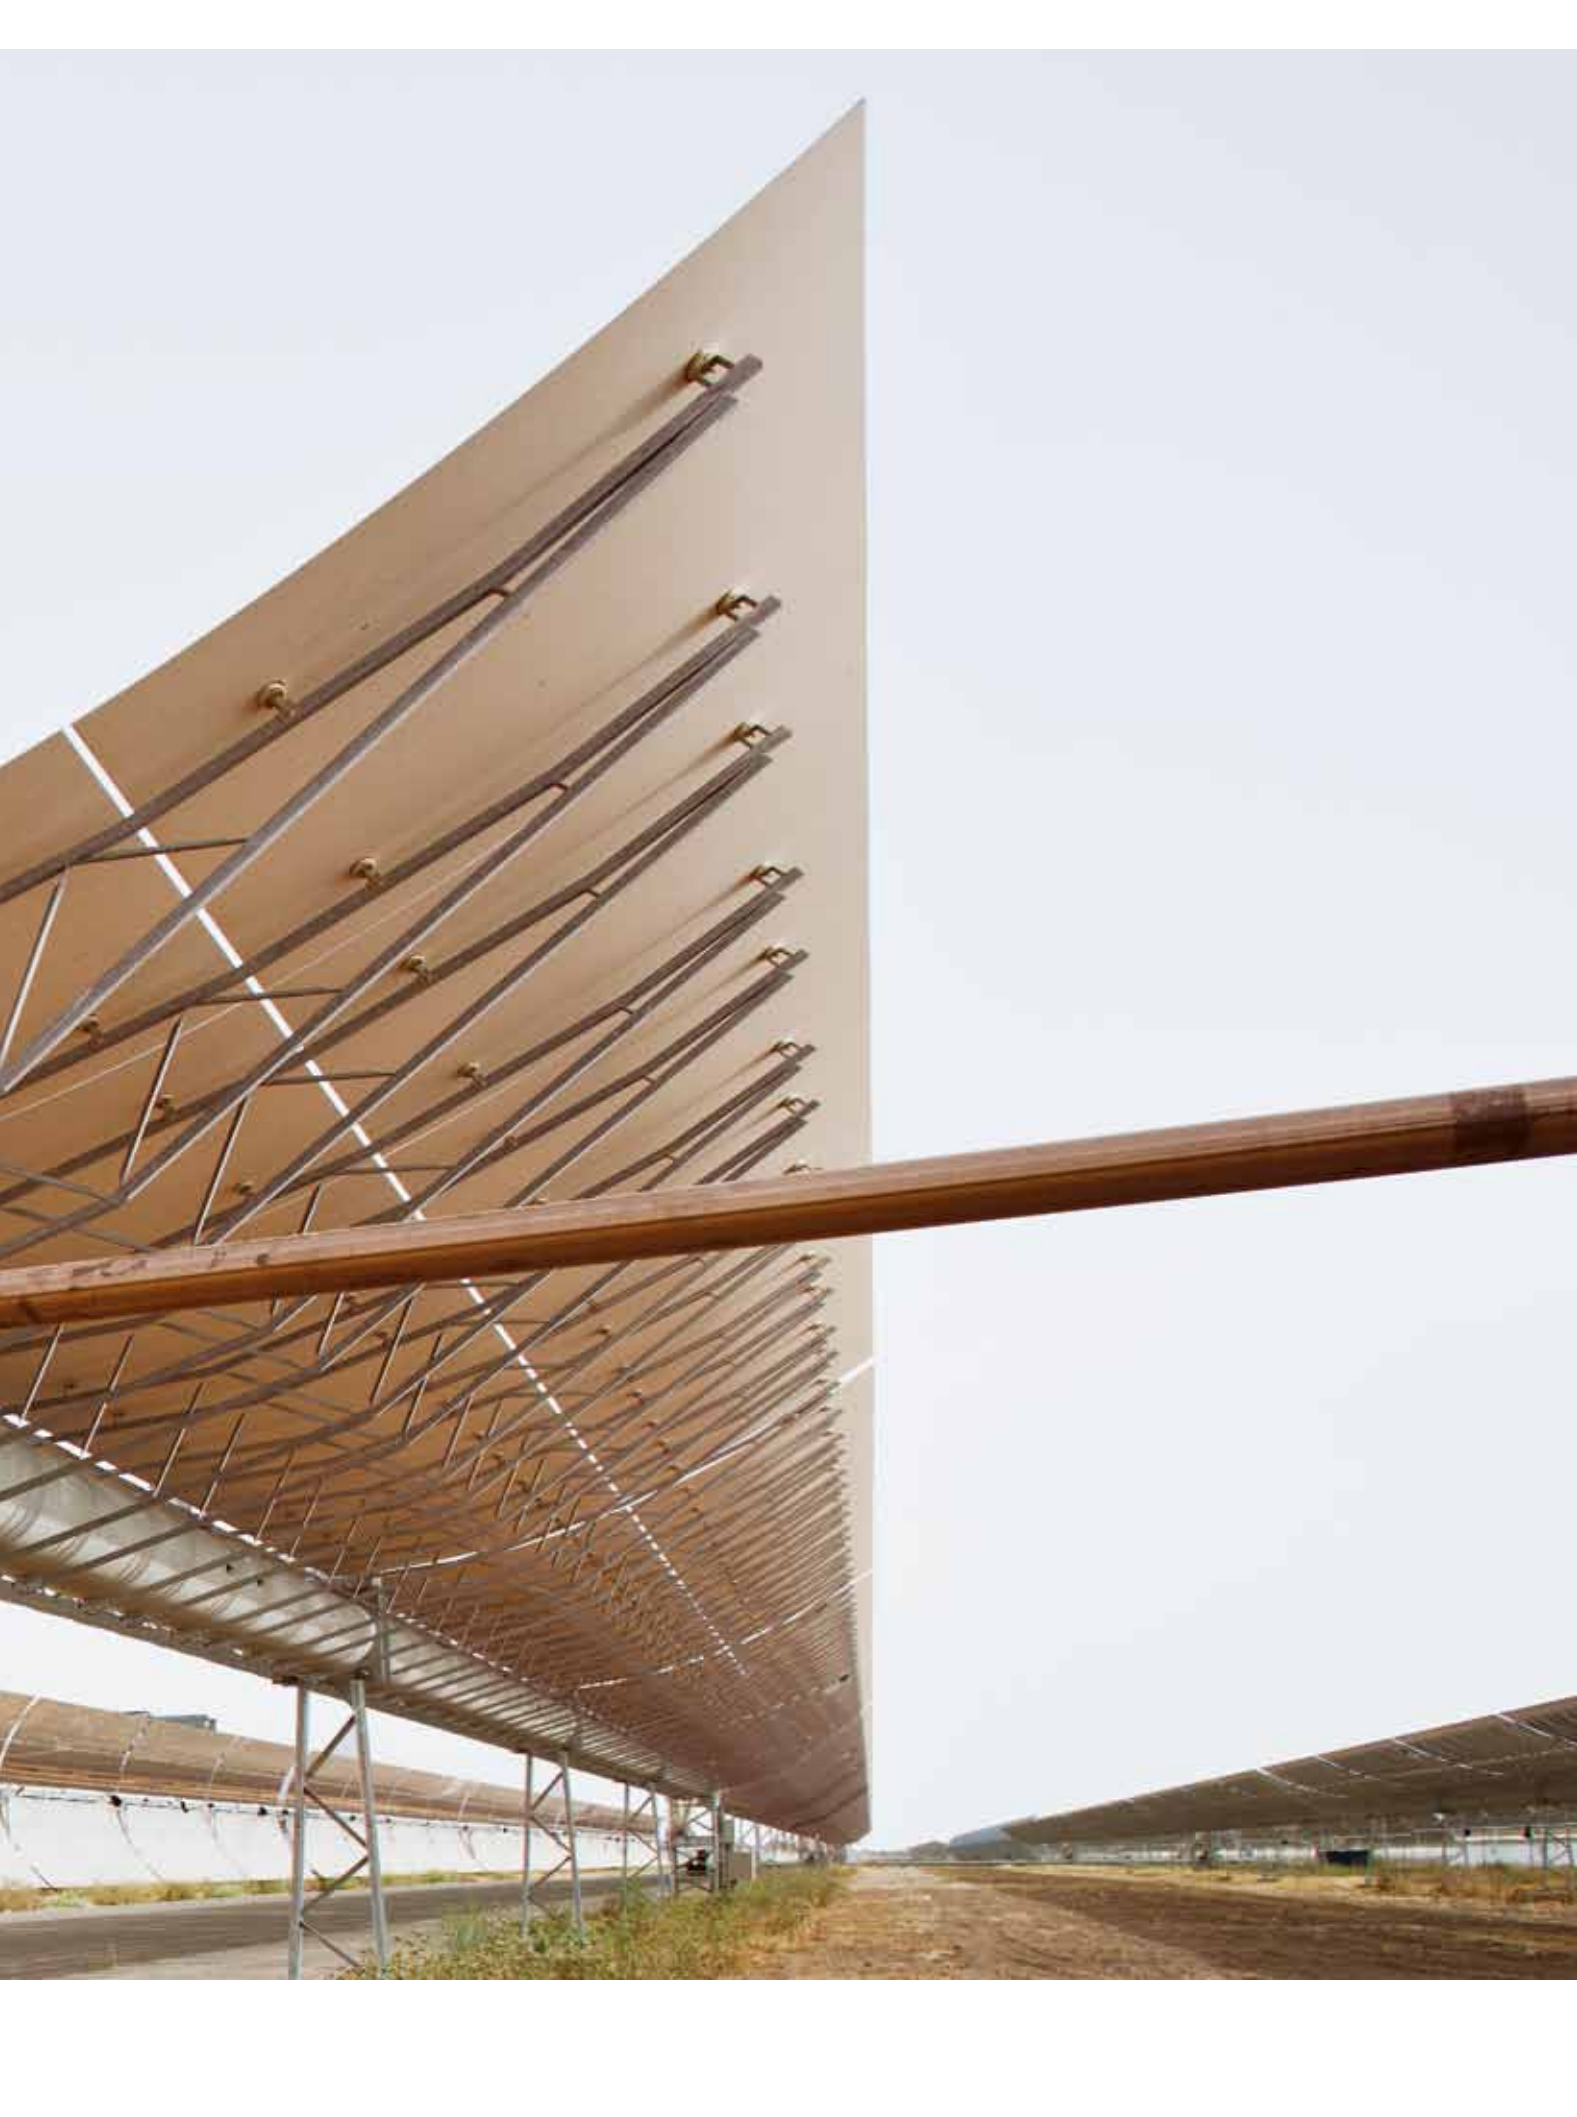

- > Auf dem Gelände einer ehemaligen Baumwollplantage werden rund 170.000 Spiegel montiert, die die Kraft der Sonne einfangen und so circa 50.000 spanische Haushalte mit CO<sub>2</sub>-freiem Strom versorgen können.
  - √ Avi Brenmiller, CEO der Geschäftseinheit Solar Thermal Energy, ist ein Pionier der Solarthermie. Gemeinsam mit ihm arbeiten für Siemens einige der führenden Experten auf dem Gebiet an der stetigen Verbesserung der Technologie.
- 

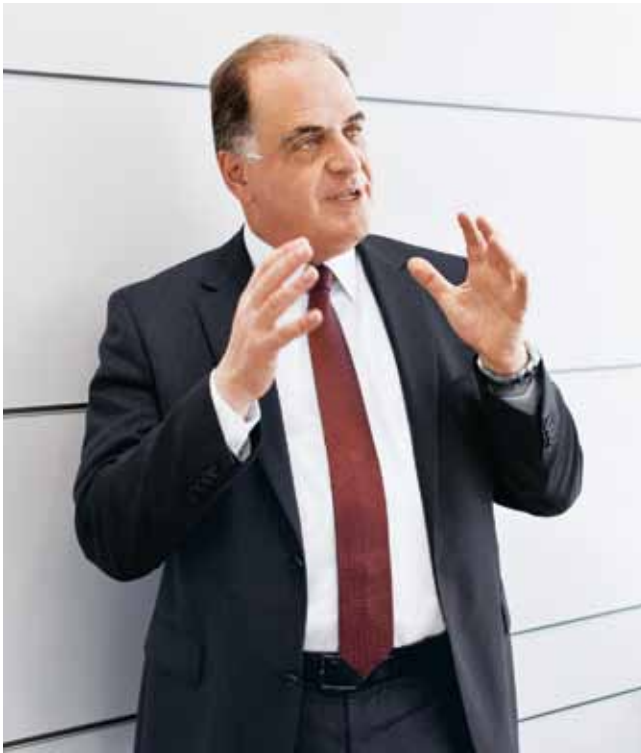

»Siemens konzentriert sich auf innovations- und technologiegetriebene Wachstumsmärkte. Die Solarthermie ist hierfür ein Beispiel, liegt doch gerade in ihr ein ungeheures Potenzial für die saubere Energieversorgung der Zukunft. Das beweist unser neues Solarkraftwerk Lebrija: Mit der Kraft der Sonne versorgen wir schon bald rund 50.000 Haushalte CO<sub>2</sub>-frei mit Strom.«





# 170.000

Einzelspiegel warten auf ihren Einsatz.

So viele Spiegel wurden in der Solarthermieanlage in Lebrija verbaut. Die Krümmung der Spiegel ist auf den Bruchteil eines Grades genau, damit möglichst viel Sonnenenergie gebündelt wird. Siemens-Ingenieur Moshe Shtamper: »Je genauer wir arbeiten, desto höher ist der Wirkungsgrad der Anlage und desto größer die CO<sub>2</sub>-Einsparung.«





# 400

Grad heiß.

Diese Temperatur kann das Thermoöl in den Receiverrohren, in denen die Sonnenwärme konzentriert wird, erreichen. Je heißer das Öl, desto höher der Wirkungsgrad der Anlage.

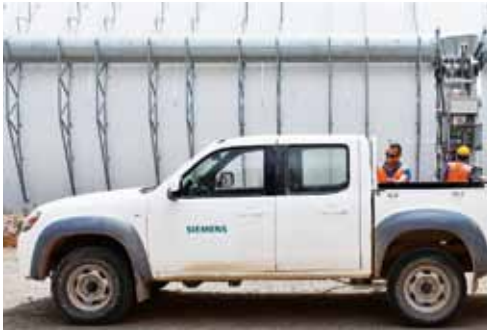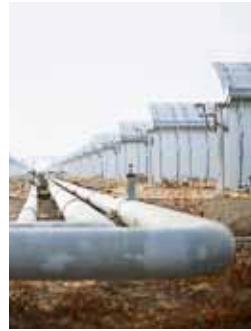

- ^ Während die einzelnen Komponenten in Hightech-Fabriken gefertigt wurden, erfolgt die Endmontage in Lebrija im Plug-and-Play-Prinzip. Hiermit verhindern wir, dass vor Ort Einzelteile aufwendig nachbearbeitet werden müssen. Die modulare Bauweise ist wichtig, wenn eines Tages in großem Maßstab Kraftwerke, beispielsweise in nordafrikanischen Steinwüsten, mithilfe lokaler Kräfte aufgebaut werden sollen.
- < Aneinandergereiht erreichen die in Lebrija errichteten Parabolspiegel eine Länge von rund 60 Kilometern.

Siemens hat fast alle Komponenten und Systeme, die für Solarthermiekraftwerke benötigt werden, im Portfolio: Dazu gehören die Kollektoren des Solarfelds, die mit den Spiegeln und den Receivern das Sonnenlicht bündeln, die Leittechnik der Anlage sowie der Kraftwerksblock, in dem eine Dampfturbine und ein Generator aus heißem Wasserdampf Strom erzeugen. Die Elektro- und Automatisierungstechnik von Siemens ermöglicht zudem eine effiziente Produktion hochwertiger Spiegel und Receiver.

Dass die Solarthermie technisch funktioniert, ist keine Frage mehr. Nun geht es darum, ihre Kosten zu senken. Unter anderem durch die Akquisition des Spezialanbieters Solel zu Beginn des Geschäftsjahrs 2010 holte sich Siemens hierfür viel Kompetenz ins Unternehmen. Nun forschen einige der führenden Experten auf dem Gebiet für Siemens an verbesserten Beschichtungen der Spiegel und an einer weiteren Optimierung der Receiverrohre, durch die das Thermoöl fließt. Die Rohre von Siemens erreichen bereits heute Rekordwerte beim Wirkungsgrad. Eine höhere Effizienz bedeutet weitere Einsatzmöglichkeiten für die Solarthermie und damit mehr Kraftwerksprojekte.





50

Megawatt.

Diese Leistung reicht aus, um  
rund 50.000 spanische Haushalte  
CO<sub>2</sub>-frei mit Strom zu versorgen.

# Sonne ernten mit Solarthermie

---

**Im Jahr 2050 könnte es so weit sein: Solarthermische Kraftwerke und Windparks in den Ländern Nordafrikas und des Nahen und Mittleren Ostens befriedigen nicht nur die eigene Stromnachfrage, sondern decken auch mehr als 15 Prozent des europäischen Strombedarfs.**

»Alles bewegt sich hier«, sagt Moshe Shtamper. Er steht im neuen Solarkraftwerk von Siemens im spanischen Lebrija und zeigt auf eine der Rohrleitungen, die heißes Thermoöl zum Wärmetauscher transportieren. »Die Rohre dehnen sich mit der Hitze aus, die Spiegel richten sich nach der Sonne aus, die Dampfturbine dreht sich. Diese Anlage erscheint mir manchmal wie ein Lebewesen.« Das »Lebewesen«, von dem der Siemens-Ingenieur spricht, befindet sich rund 60 Kilometer südlich von Sevilla, in Andalusien. Sein Team ließ die Baumwollfelder abernten, die sich früher hier befanden, und legt nun letzte Hand an das Kraftwerk, das hier ab 2011 erstmals Strom erzeugt. 50 Megawatt Leistung, das reicht für rund 50.000 spanische Haushalte.

An vielen anderen Orten weltweit wird ebenfalls an sogenannten CSP-Kraftwerken (*Concentrated Solar Power – CSP*) gebaut, die die konzentrierte Energie der Sonne nutzen. Sie funktionieren nach einem anderen Prinzip als die Photovoltaikanlagen, bei denen in Siliziumzellen direkt elektrische Energie erzeugt wird. Bei solarthermischen Kraftwerken braucht man kein teures Silizium. Hier bündeln Spiegel die Sonnenenergie und erhitzen Öl, das

seine Energie an Wasser abgibt, das schließlich verdampft. Der Dampf wiederum treibt mit hohem Druck eine Turbine an, die über einen Generator die mechanische Energie in Strom umsetzt.

Insbesondere in Regionen mit sehr starker Sonneneinstrahlung, beispielsweise in der Sahara, arbeiten CSP-Kraftwerke sehr effizient, während bei Photovoltaikanlagen der Wirkungsgrad in heißer Umgebung abnimmt. So kann die Hitze über mehrere Stunden in Wärmespeichern eingefangen und selbst nachts dazu genutzt werden, Strom zu speichern. Solarthermische Kraftwerke sind damit in der Lage, gleichmäßig und planbar Strom zu produzieren, der ähnlich wie bei fossilen Kraftwerken die fluktuierende Erzeugung aus Windkraft und Photovoltaik ausgleichen kann.

Aus diesen Gründen setzen zahlreiche Staaten Nordafrikas inzwischen auf die Solarthermie. Allein Marokko will bis zum Jahr 2020 die Stromerzeugung in CSP-Anlagen auf 2.000 Megawatt ausbauen – das entspricht der Leistung von zwei großen konventionellen Kraftwerken. Eines Tages könnte das sonst ressourcenarme Land, das heute fast seine gesamte Energie importieren muss, damit sogar Sonnenstrom nach Europa exportieren. Das ist die Idee hinter einer Vision, die mit dem Namen »DESERTEC« verbunden wird: ein Netzwerk von Kraftwerken, die mit erneuerbaren Energien in Nordafrika und dem Nahen und Mittleren Osten Strom erzeugen. Mithilfe von Sonne und Wind könnten bis 2050 mehr als 15 Prozent des europäischen Bedarfs gedeckt werden.

»Mit dem Windgeschäft hat Siemens vor Jahren gezeigt, wie eine umweltfreundliche Zukunftstechnologie binnen weniger Jahre zum lukrativen Geschäft werden kann. Bei der Solarenergie stellen wir die Weichen nun in die gleiche Richtung«, sagt René Umlauf, CEO der Siemens-Division Renewable Energy. Am Markt für solarthermische Kraftwerke, so scheint es, ist nicht weniger Bewegung als in den Kraftwerken selbst.

[www.siemens.com/lebrija](http://www.siemens.com/lebrija)

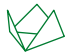

Die Welt verändert sich und mit ihr die Gesellschaften, in denen wir als Unternehmen weltweit tätig sind. Klimawandel und Globalisierung, eine dynamisch fortschreitende Verstärkung, der demografische Wandel und seine Auswirkungen – all das prägt die Lebenswelt des Menschen und sein wirtschaftliches Umfeld. Ein beständiger Wandel, der einem Unternehmen wie dem unseren großartige neue Chancen eröffnet.

Siemens hat dies früher als andere erkannt und sein Portfolio entsprechend positioniert. Wir haben unser Unternehmen rechtzeitig strategisch auf die wichtigsten Trends der Zeit ausgerichtet. So sind wir gut aufgestellt, auch in Zukunft nachhaltig und profitabel zu wachsen.



## 32-prozentiger Zuwachs der Weltbevölkerung bis 2050.

Als einer der weltweit größten Anbieter im Gesundheitswesen stellen wir uns dieser Herausforderung.

[www.siemens.com/demografischer-wandel](http://www.siemens.com/demografischer-wandel)

---

### Demografischer Wandel und Gesundheit

Im Jahr 2011 leben mehr Menschen als je zuvor auf der Welt, und noch nie war ihre Lebenserwartung so hoch. Bis 2050 soll die Bevölkerung von heute fast sieben auf dann neun Milliarden Menschen anwachsen. Und das bei steigender Lebenserwartung. Werden die Menschen im weltweiten Durchschnitt derzeit circa 68 Jahre alt, so gehen Experten von 76 Jahren zur Jahrhundertmitte aus. 1950 waren es 46 Jahre. Der Anteil der über 65-Jährigen wird sich nach Schätzungen der Vereinten Nationen im gleichen Zeitraum sogar fast verdreifachen.

Der Megatrend des demografischen Wandels lässt die Nachfrage nach medizinischen Leistungen weiter zunehmen. Zugleich belasten die Ausgaben dafür die finanziellen Ressourcen von Staaten und Versicherungsträgern. Die Industrieländer wenden für ihr Gesundheitswesen zum Teil bereits mehr als zehn Prozent ihres Bruttozialprodukts auf – Tendenz steigend. Auch die schneller wachsenden

Schwellen- und Entwicklungsländer können die Qualität ihrer medizinischen Versorgung bislang nicht so schnell steigern, wie ihre Bürger es wünschen. Die Herausforderung für Siemens lautet deshalb: Wie können wir die Effizienz und Bezahlbarkeit der Gesundheitssysteme verbessern und gleichzeitig die Qualität der Versorgung für den einzelnen Patienten erhöhen?

Mit technologischen Innovationen von Siemens lassen sich medizinische Behandlungen optimieren und gleichzeitig Kosten senken, zum Beispiel indem Krankheiten deutlich früher erkannt und behandelt werden können als bisher. Heilungschancen steigen, teure Therapien in einem fortgeschrittenen Stadium entfallen. Siemens-Produkte und -Lösungen für die gesamte medizinische Versorgungskette – von der Prävention und Früherkennung über die Diagnose bis zur Therapie und Nachsorge – helfen, Krankheiten früher, genauer und schonender zu diagnostizieren und im Sinne von personalisierter Medizin effizienter und individueller zu behandeln.

Mit dem **Green City Index** unterstützt  
Siemens die Bemühungen der Städte um effizienten Klimaschutz –  
denn wir sind der ideale Partner für die Verwirklichung  
klimafreundlicher Infrastrukturlösungen.

[www.siemens.com/city-index](http://www.siemens.com/city-index)

## Urbanisierung und nachhaltige Entwicklung

Im Jahr 2009 lebten erstmals in der Geschichte der Menschheit mehr Menschen in Städten als auf dem Land. Bis 2050 wird der Anteil der Städter auf 70 Prozent steigen – bei einer gleichzeitigen Zunahme der Weltbevölkerung. Diese stetig wachsenden Ballungsräume leisten einen überproportional hohen Beitrag zur wirtschaftlichen Entwicklung. Tokio beispielsweise erwirtschaftet 40 Prozent des Bruttoinlandsprodukts von Japan, Paris trägt mit 30 Prozent zum französischen Bruttoinlandsprodukt bei. Die Städte werden ökonomisch immer bedeutender. Zugleich wünschen sich die Menschen ein lebenswertes Umfeld. Saubere Luft, reines Trinkwasser, eine verlässliche Energieversorgung und sichere Verkehrssysteme sind Grundbedürfnisse.

Der Megatrend Urbanisierung stellt eine gewaltige Herausforderung dar. Ballungsräume verbrauchen aktuell rund 75 Prozent der weltweit eingesetzten Energie und produzieren 80 Prozent der Treibhausgasemissionen. Allein durch Verkehrsstaus verliert die Europäische Union heute jährlich geschätzte 100 Milliarden Euro an Wirtschaftsleistung. Unsere Aufgabe: Wie lässt sich eine komfortable, umweltschonende und kosteneffiziente Infrastruktur für die Zukunft verwirklichen?

Siemens-Produkte und -Lösungen für die verarbeitende Industrie, den städtischen Nahverkehr, die Gebäudetechnik, die Energieumwandlung und -ver-

teilung sowie für Krankenhäuser schaffen eine energieeffiziente und nachhaltige Infrastruktur. Sie steigert die Lebensqualität in den Städten und Ballungsräumen, fördert die Wettbewerbsfähigkeit und schont Ressourcen und Umwelt.

## Klimawandel und Energieversorgung

Wissenschaftliche Erkenntnisse belegen eindrucksvoll, dass sich unser Klima erwärmt. Von 1850 bis zum Beginn des 21. Jahrhunderts stieg die durchschnittliche Temperatur der Erdoberfläche um 0,76° Celsius. Elf der zwölf wärmsten Jahre seit Beginn der Wetteraufzeichnungen wurden zwischen 1994 und 2005 gemessen. Parallel zur Erwärmung der Erdoberfläche stieg die Emission von Treibhausgasen seit der Industrialisierung massiv an. Heute erreicht die CO<sub>2</sub>-Konzentration in der Atmosphäre den höchsten Stand seit 800.000 Jahren.

Der Klimawandel ist eng an die demografische Entwicklung gekoppelt. Mit der Zunahme der Weltbevölkerung und der fortschreitenden Globalisierung wird die Stromerzeugung bis zum Jahr 2030 weltweit um mehr als 60 Prozent ansteigen. Zwei Drittel des Zuwachses werden die Schwellen- und Entwicklungsländer generieren. Um den Anstieg der Erderwärmung auf maximal 2° Celsius zu begrenzen, sind drastische Maßnahmen erforderlich. Das wirksamste Mittel zur Bekämpfung der negativen Folgen des Klimawandels sind Innovationen – in der Energieeffizienz, der Energieerzeugung, der Ener-

Die Herausforderungen, denen sich die Welt gegenüber sieht, sind global.

Wir sind es auch: In rund **190 Ländern der Welt** sind wir nahe beim Kunden und bei seinen Anforderungen.

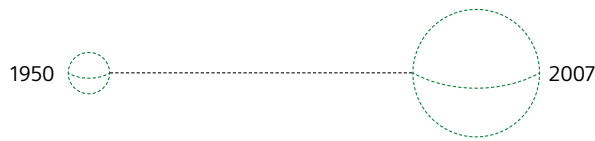

Deutliche Zunahme des realen Warenexports

[www.siemens.com/weltweit](http://www.siemens.com/weltweit)

gieverteilung und beim Energieverbrauch. Hier sind wir Vorreiter und leisten einen wichtigen Beitrag: als einer der weltweit führenden Anbieter von Produkten, Lösungen und Dienstleistungen über die gesamte Energieumwandlungskette. Unsere Technologien helfen dabei, einen höheren Wirkungsgrad bei der Energieerzeugung aus fossilen Brennstoffen zu erzielen, effektivere Wind- und Sonnenenergieanlagen zu errichten, intelligente Stromnetze aufzubauen, die industrielle Produktion energieeffizienter zu gestalten und energiesparende Beleuchtungssysteme zu etablieren.

## Globalisierung und Wettbewerbsfähigkeit

Nationale Wirtschaftsräume verlieren an Bedeutung. Das 21. Jahrhundert startet mit einer fortschreitenden internationalen Vernetzung und immer mehr multinationalen Unternehmen. Wie stark die Welt zusammenwächst, belegen die folgenden Zahlen: Aus ungefähr 10.000 multinationalen Unternehmen in den Jahren 1968/69 wurden innerhalb von rund 40 Jahren mehr als 80.000. Dazu hat sich das Seefrachtaufkommen in den vergangenen 40 Jahren mehr als verdreifacht.

Globalisierte Märkte bieten Unternehmen viele neue Chancen, erhöhen aber auch den Wettbewerbsdruck. Dabei kommt es zu regionalen Verschiebungen der Wirtschaftskräfte. Die Schwellenländer werden in Zukunft stärker als bisher die Wachstumsregionen

der Welt sein. In den sogenannten BRIC-Staaten Brasilien, Russland, Indien und China erwarten Experten für die kommenden Jahre ein doppelt so hohes Wirtschaftswachstum wie in den etablierten OECD-Staaten. Unsere Herausforderung lautet deshalb: Wie können wir dauerhaft Spitzenpositionen an den Märkten der Zukunft einnehmen und uns so im globalen Wettbewerb behaupten?

Ein Schlüssel für Erfolg im weltweiten Wirtschaftsnetz ist global geprägtes Denken und Handeln. Siemens ist in rund 190 Ländern der Welt vertreten und bereits seit über 100 Jahren in den BRIC-Staaten tätig. Wir haben den Anspruch, überall kostengünstig und bezahlbar, zugleich auch schnell, qualitativ hochwertig und zugeschnitten auf die Bedürfnisse der Kunden zu produzieren. Global agierende Kunden kann Siemens mit einfachen, weltweit verfügbaren Lösungen versorgen. Es sind Systeme von Siemens, die die Lebensqualität vieler Menschen weltweit verbessern; kaum ein Unternehmen kann es mit unserem Angebot an Produkten und Dienstleistungen, unserem Know-how und unseren wertschöpfenden Lösungen aufnehmen. Nur einige Beispiele: Unsere Automatisierungssysteme und Softwarelösungen vereinfachen und verkürzen industrielle Prozesse, unsere Gebäude- und Sicherheitstechnologie schafft optimale und effiziente Produktions- und Arbeitsbedingungen, und unsere Wasseraufbereitungsanlagen tragen dazu bei, den ständig wachsenden Bedarf an Wasser nachhaltig zu decken. Außerdem sorgen wir für Mobilität und vernetzen Transportsysteme weltweit.

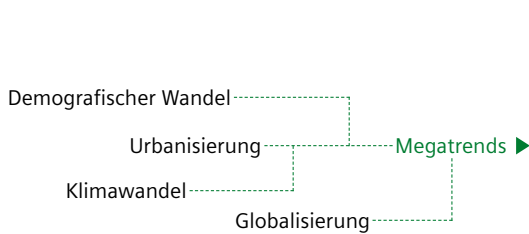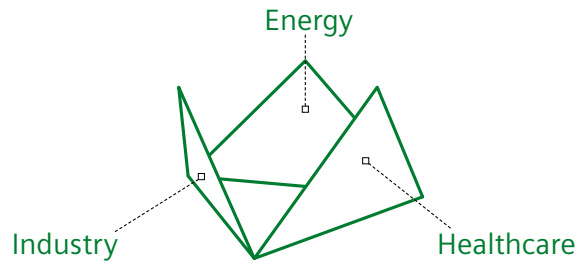

## Starke Aufstellung

Siemens hat seine Geschäfte nachhaltig aufgestellt und fokussiert sie konsequent auf die Megatrends demografischer Wandel, Urbanisierung, Klimawandel und Globalisierung. Zur systematischen Erschließung der geschäftlichen Potenziale dieser Megatrends an traditionellen und neuen Märkten organisieren wir unsere Aktivitäten in den drei Sektoren Industry, Energy und Healthcare. Sie bilden auch die Seiten der Siemens-Strategiepyramide. Siemens ist ein integrierter Technologiekonzern, der von den drei Sektoren und den in 17 Clustern zusammengefassten Regionalgesellschaften getragen wird. Sektorübergreifend ergänzen effiziente IT- und Finanzlösungen das weltweite Portfolio.

[www.siemens.com/aufstellung](http://www.siemens.com/aufstellung)

Der Sektor **Industry** ist einer der weltweit führenden Anbieter von Produktions-, Transport-, Gebäude- und Lichttechnik. Indem wir Produktivität, Effizienz und Flexibilität kontinuierlich optimieren, gelingt es uns, die ökonomische und ökologische Wettbewerbsfähigkeit von Industrie- und Infrastrukturkunden zu steigern. Siemens Industry beschäftigt weltweit rund 204.000 Mitarbeiter und ist in mehr als 130 Ländern präsent. Im Geschäftsjahr 2010 erzielte der Sektor einen Gesamtumsatz von 34.869 Millionen Euro und ein Ergebnis von 3.478 Millionen Euro.

[www.siemens.com/industry](http://www.siemens.com/industry)

Der Sektor **Energy** ist einer der weltweit führenden Anbieter eines breiten Spektrums von Produkten, Lösungen und Dienstleistungen im Bereich Energietechnik. Wir versetzen unsere Kunden in die Lage, elektrische Energie zu erzeugen, zu übertragen sowie zu verteilen – und zwar nach den höchsten Effizienzstandards. Außerdem helfen wir ihnen dabei, die Primärenergieträger Öl und Gas zu gewinnen, umzuwandeln und zu transportieren. Als weltweit einziger Hersteller verfügt der Sektor Energy über das Know-how, die richtigen Produkte, Lösungen und Kernkomponenten entlang der gesamten Energieumwandlungskette. Deutlich wird das nicht zuletzt im Bereich der Schnittstellen: zum Beispiel zwischen der Stromerzeugung und der Netzanbindung sowie der Integration in das Stromnetz und der intelligenten Verteilung zum Verbraucher – hier zeigt sich unsere am Markt herausragende Lösungskompetenz. Siemens Energy beschäftigt weltweit rund 88.000 Mitarbeiter. Im Geschäftsjahr 2010 erzielte der Sektor einen Gesamtumsatz von 25.520 Millionen Euro und ein Ergebnis von 3.562 Millionen Euro.

[www.siemens.com/energy](http://www.siemens.com/energy)

Der Sektor **Healthcare** ist weltweit einer der größten Anbieter im Gesundheitswesen. Er versteht sich als Spezialist für medizinische Lösungen; seine Kernkompetenzen und seine Innovationsstärke liegen einerseits in diagnostischen und therapeutischen Technologien und andererseits in der Wissens-

Wir haben frühzeitig unser Unternehmen auf die  
Megatrends der Zeit strategisch ausgerichtet.

So sind wir gut aufgestellt, auch in Zukunft  
**nachhaltig und profitabel** zu wachsen.

[www.siemens.com/strategie](http://www.siemens.com/strategie)

verarbeitung einschließlich Informationstechnologie und Systemintegration. Mit seinen Akquisitionen in der Labordiagnostik ist Siemens Healthcare das erste integrierte Gesundheitsunternehmen, das Bildgebung, Labordiagnostik, Therapielösungen sowie medizinische Informationstechnologie miteinander verbindet und um Beratungs- und Serviceleistungen ergänzt. Um Markt- und Wachstumspotenziale noch stärker auszuschöpfen, wird sich Healthcare künftig in vier Einheiten aufstellen: Imaging & Therapy Systems, Clinical Products, Diagnostics und Customer Solutions. Das Hörgerätegeschäft wird eigenständig geführt. Siemens Healthcare beschäftigt weltweit rund 49.000 Mitarbeiter und ist in mehr als 130 Ländern präsent. Im Geschäftsjahr 2010 erzielte der Sektor einen Gesamtumsatz von 12.364 Millionen Euro und ein Ergebnis von 748 Millionen Euro.

[www.siemens.com/healthcare](http://www.siemens.com/healthcare)

Als ein in Europa ansässiger, führender IT-Dienstleister mit weltweiter Präsenz richtet sich **Siemens IT Solutions and Services** konsequent an den spezifischen Anforderungen des weltweiten IT-Markts aus: Seine IT-Lösungen und -Dienstleistungen unterstützen Kunden von privaten Unternehmen und aus dem öffentlichen Sektor darin, mit Informationstechnologie geschäftlichen Mehrwert zu schaffen. Vom Consulting über die Systemintegration bis zum Management von IT-Infrastrukturen: Siemens IT Solutions and Services

liefert entlang der IT-Dienstleistungskette alles aus einer Hand. Im Geschäftsjahr 2010 erwirtschaftete Siemens IT Solutions and Services mit 32.000 Mitarbeitern einen Gesamtumsatz von 4.155 Millionen Euro und ein negatives Ergebnis von 537 Millionen Euro.

[www.siemens.com/gbl/it-solutions](http://www.siemens.com/gbl/it-solutions)

Finanzierung spielt eine immer wichtigere Rolle, wenn es darum geht, Investitionen in Energy-, Industry- und Healthcare-Technologien zu ermöglichen. Maßgeschneiderte Finanzlösungen werden somit zu einem immer klareren Wettbewerbsfaktor für Siemens beim Gewinnen neuer Kunden. **Siemens Financial Services** (seit 01.10.2010 Financial Services) stellt Kapital für Infrastruktur, Equipment und Betriebsmittel sowie Dienstleistungen sowohl für Siemens als auch für Business-to-Business-Kunden zur Verfügung – und das weltweit. Mit 2.000 Mitarbeitern erwirtschaftete Siemens Financial Services im Berichtsjahr ein Ergebnis vor Ertragsteuern in Höhe von 447 Millionen Euro.

[www.siemens.com/gbl/finance](http://www.siemens.com/gbl/finance)



# SOMATOM Spirit – eine Erfolgsgeschichte aus China

Reportage 2

---

## Starker Partner unserer Kunden vor Ort

Im chinesischen Shanghai fertigt Siemens das Einsteigerprodukt SOMATOM Spirit. Ein Drittel der jährlichen Produktion des Computertomographen geht direkt an Kunden in China.

Rund 600 Systeme sind bereits im Land installiert – eines davon im Jiang County People's Hospital. Weltweit haben wir mittlerweile mehr als 1.800 Systeme bei Kunden im Einsatz.

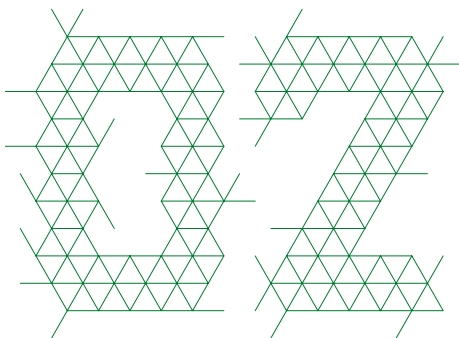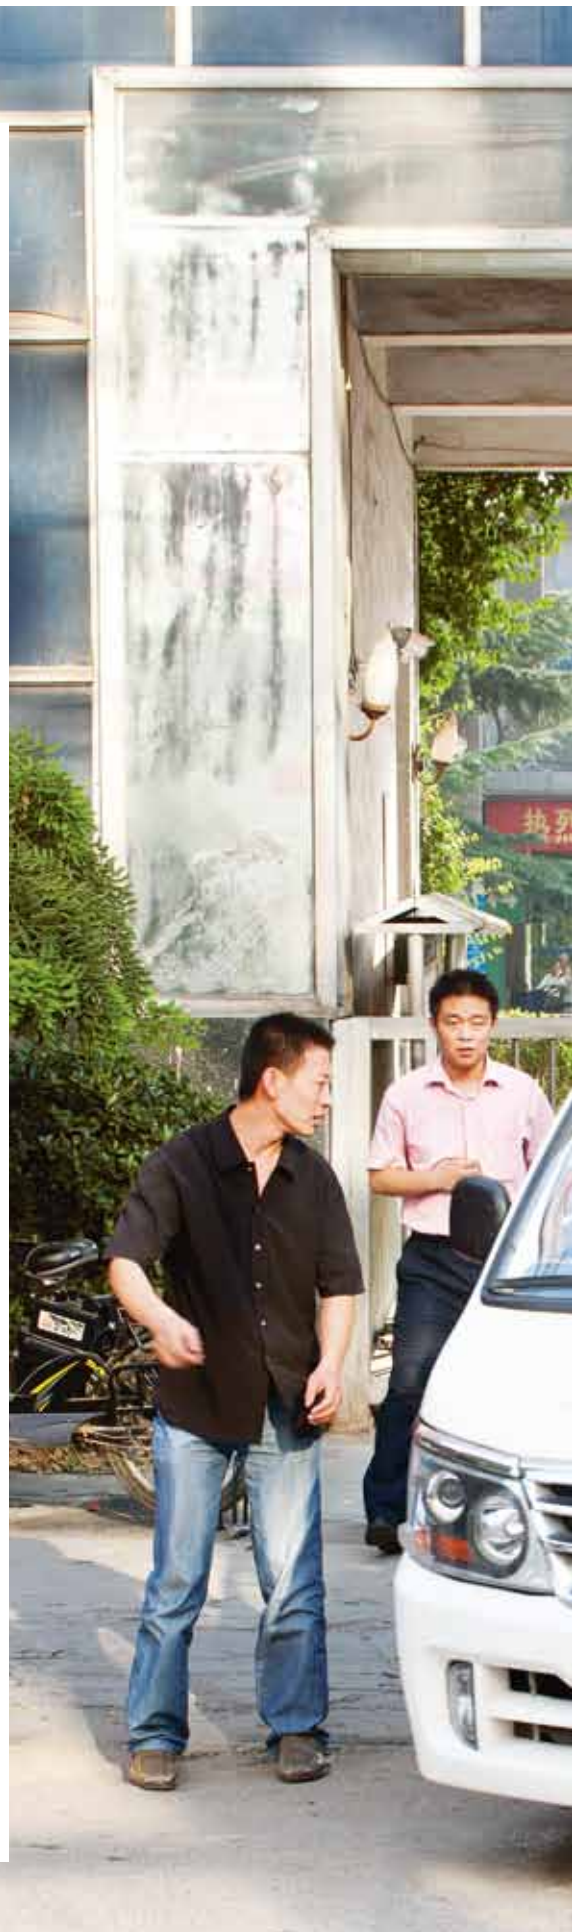



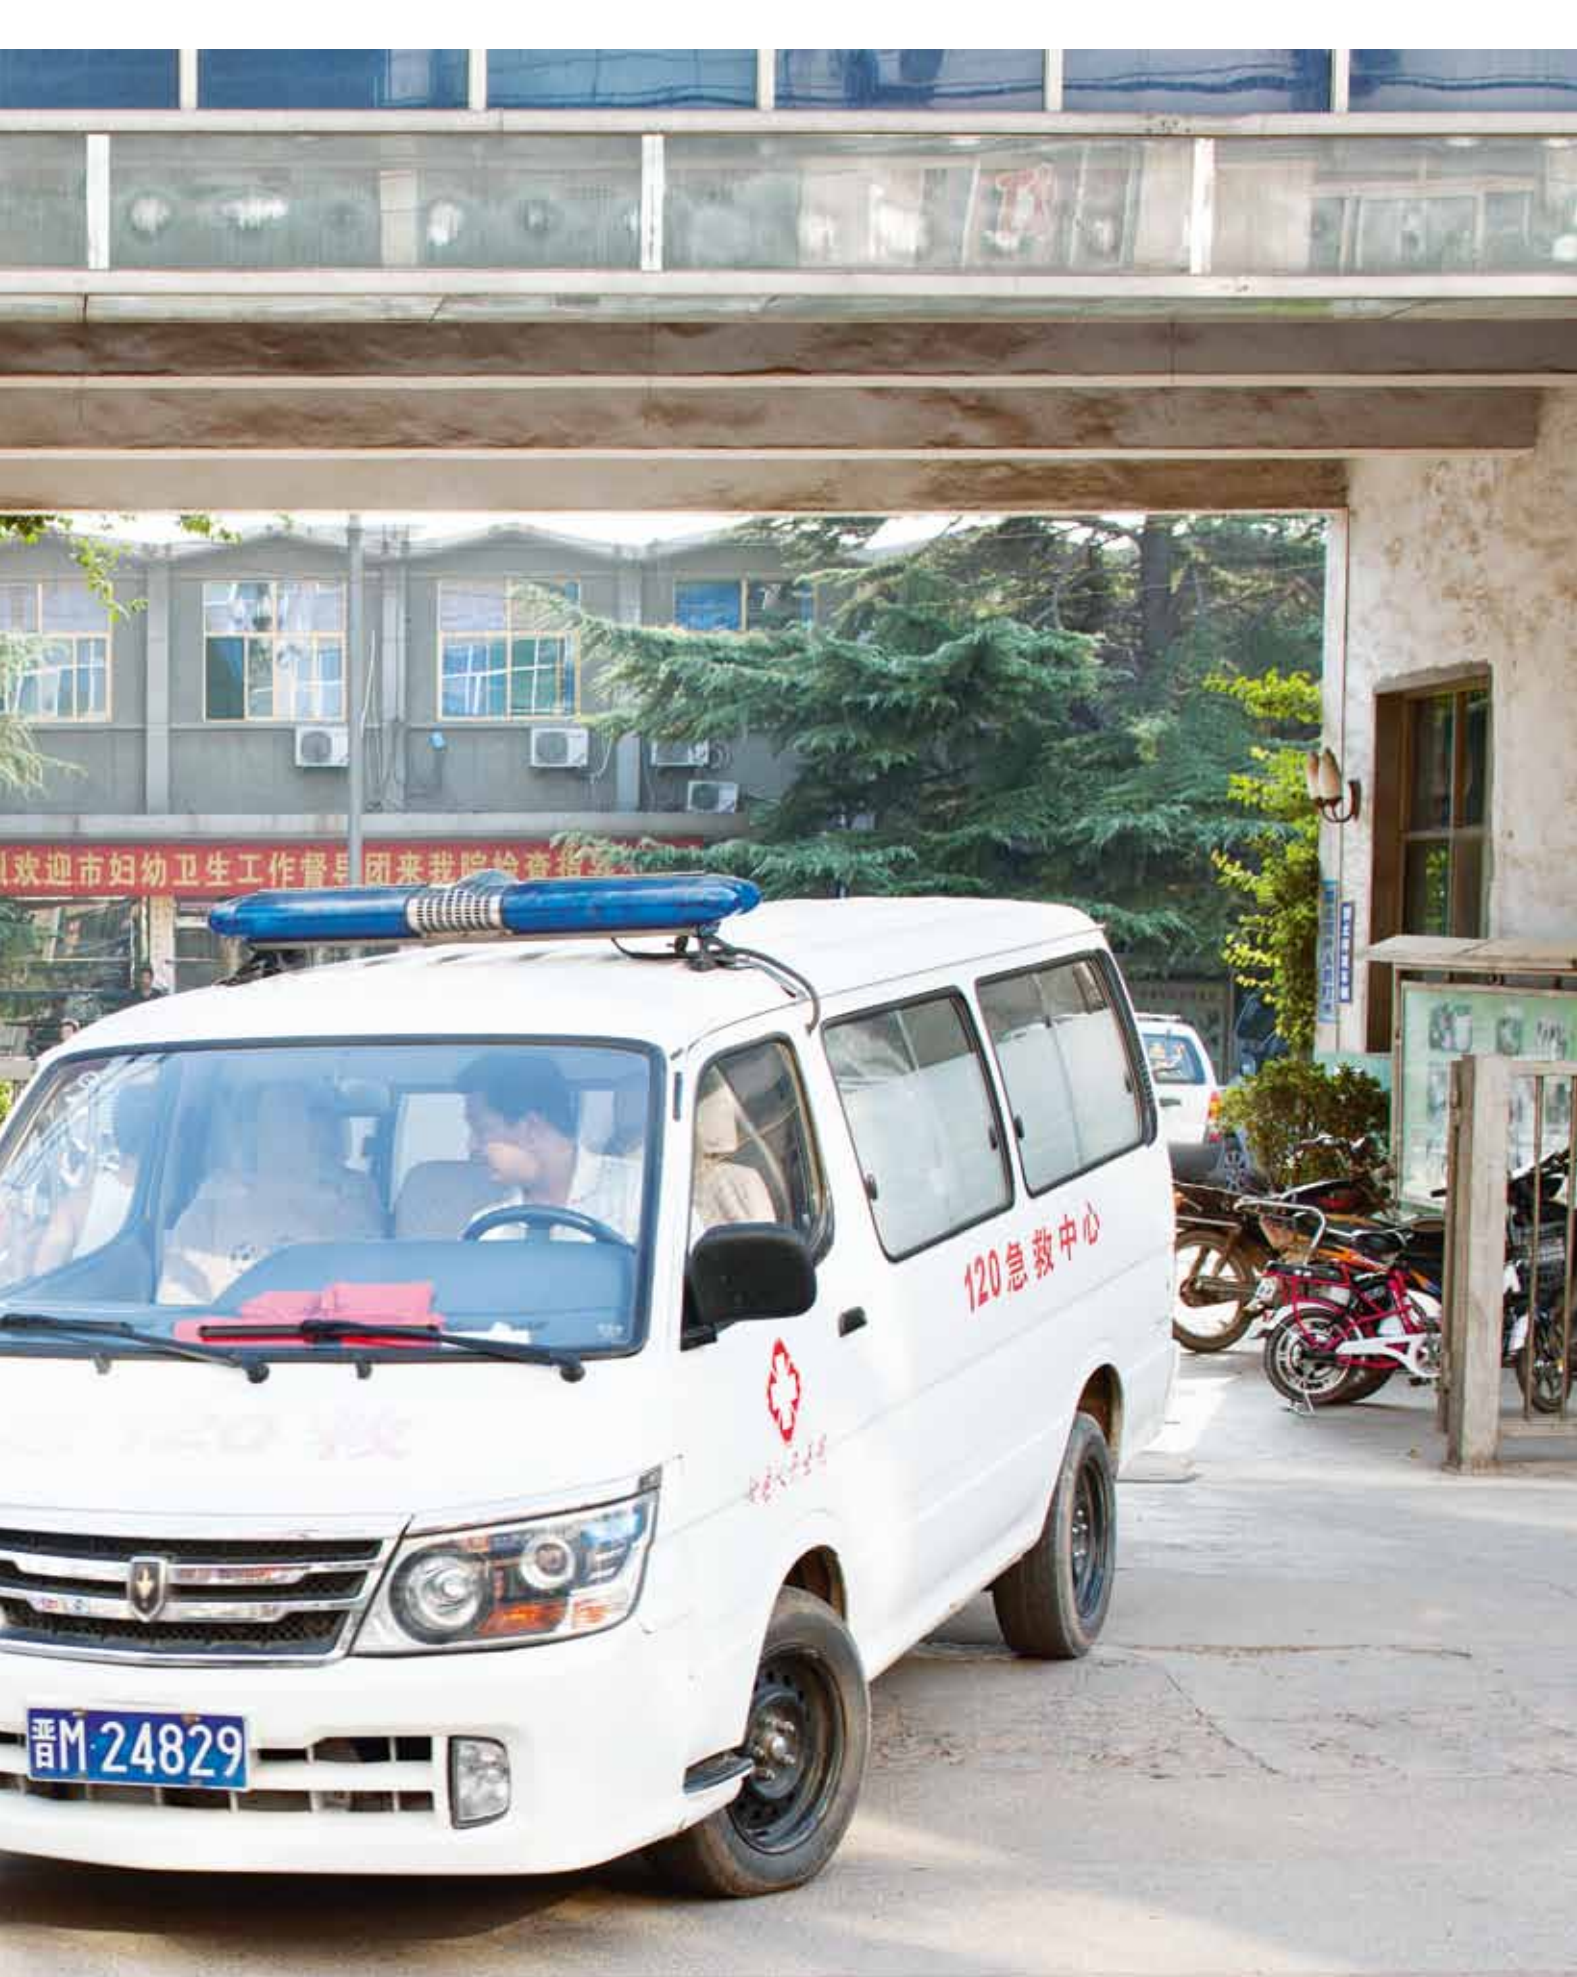

- > Eine Frau mit Kopfverletzung wird nach einem Unfall für die Untersuchung im Computertomographen vorbereitet.
- √ Weil im Jiang County People's Hospital vor zwei Jahren ein neuer SOMATOM Spirit angeschafft wurde, fiel Radiologe Dr. Zheng Jie Hua die Rückkehr nach einem einjährigen Training in Peking nicht schwer.

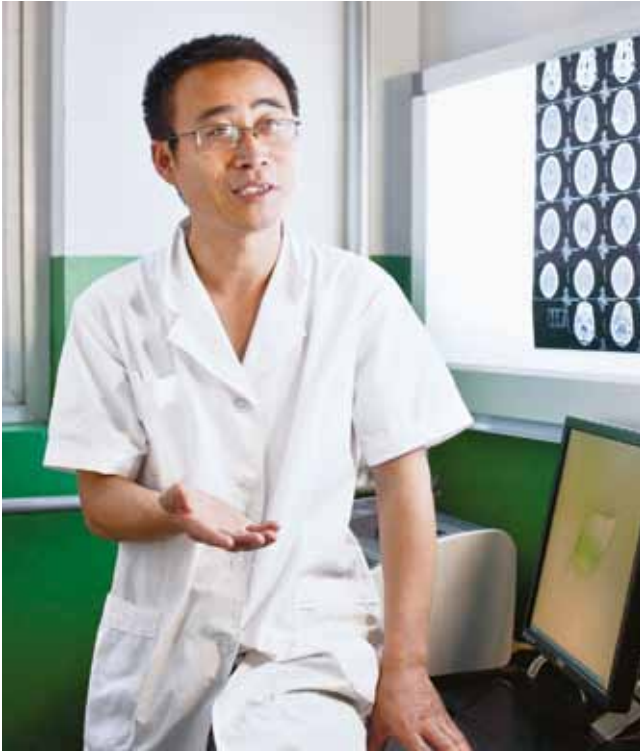

Das Jiang County People's Hospital war vor zwei Jahren das erste Krankenhaus in der Region, das sich für den SOMATOM Spirit entschieden hat.

Dr. Zheng Jie Hua, Chef der Radiologie: »Früher hat ein Kopfscan noch zehn Minuten gedauert. Mit dem SOMATOM Spirit hingegen nimmt der ganze Prozess – inklusive Patientenpositionierung und -entlassung – nicht mehr als fünf Minuten in Anspruch.«



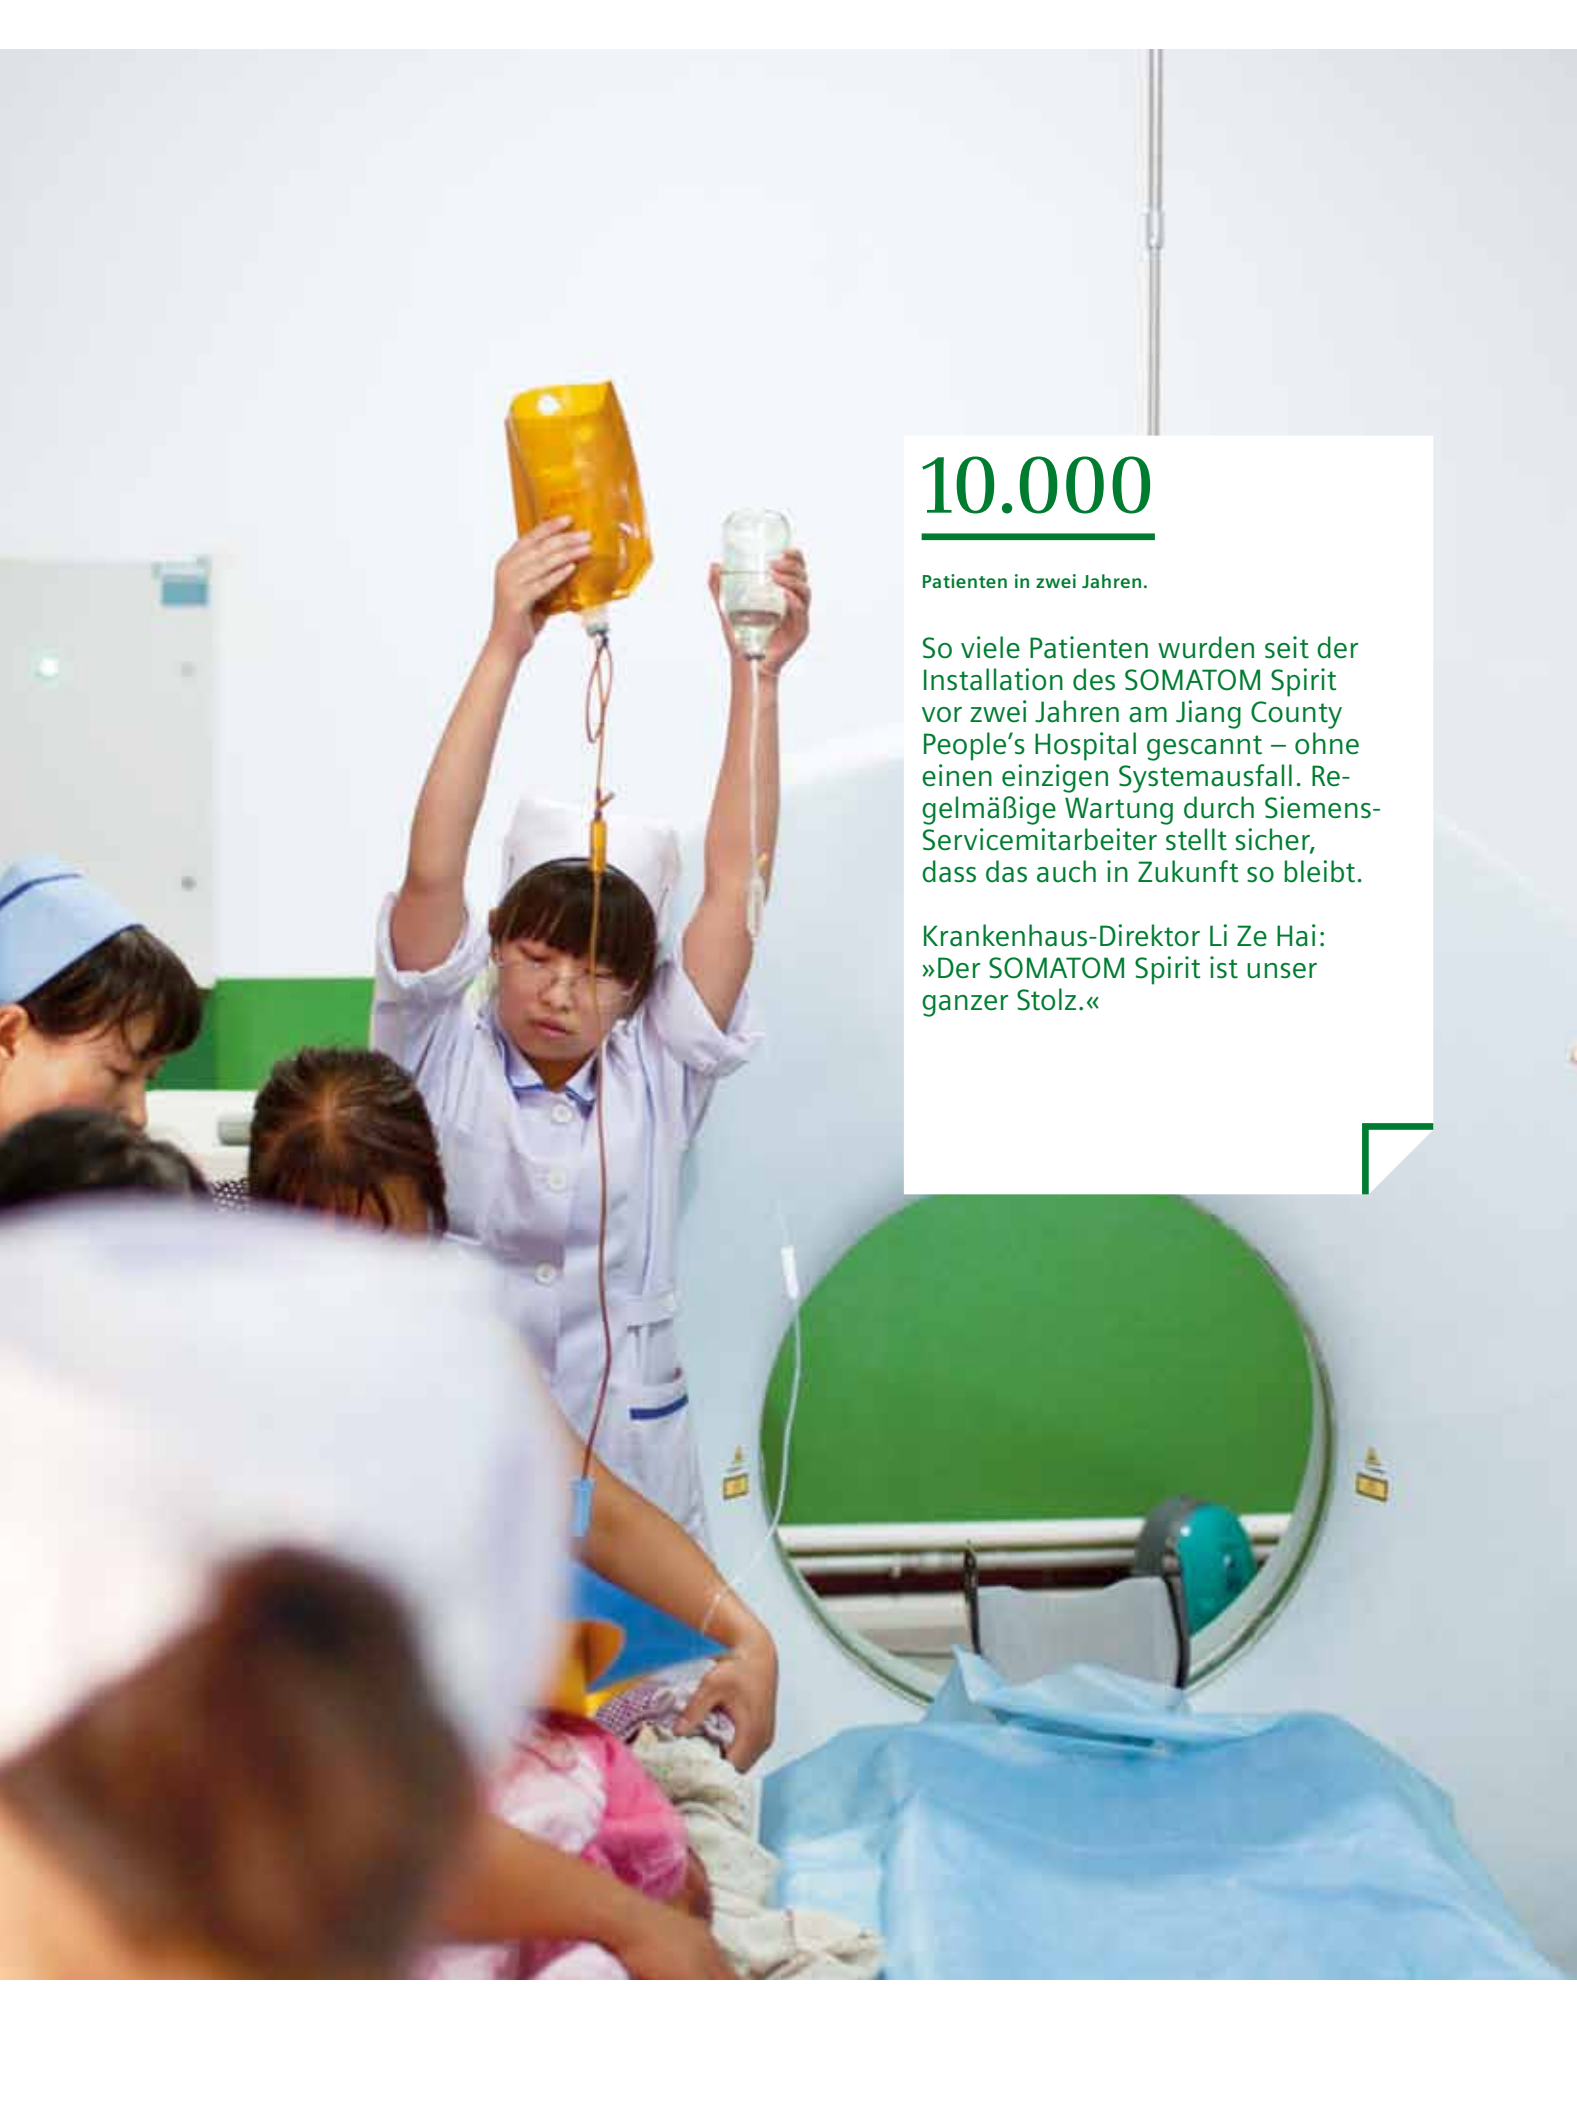

# 10.000

Patienten in zwei Jahren.

So viele Patienten wurden seit der Installation des SOMATOM Spirit vor zwei Jahren am Jiang County People's Hospital gescannt – ohne einen einzigen Systemausfall. Regelmäßige Wartung durch Siemens-Service Mitarbeiter stellt sicher, dass das auch in Zukunft so bleibt.

Krankenhaus-Direktor Li Ze Hai:  
»Der SOMATOM Spirit ist unser ganzer Stolz.«

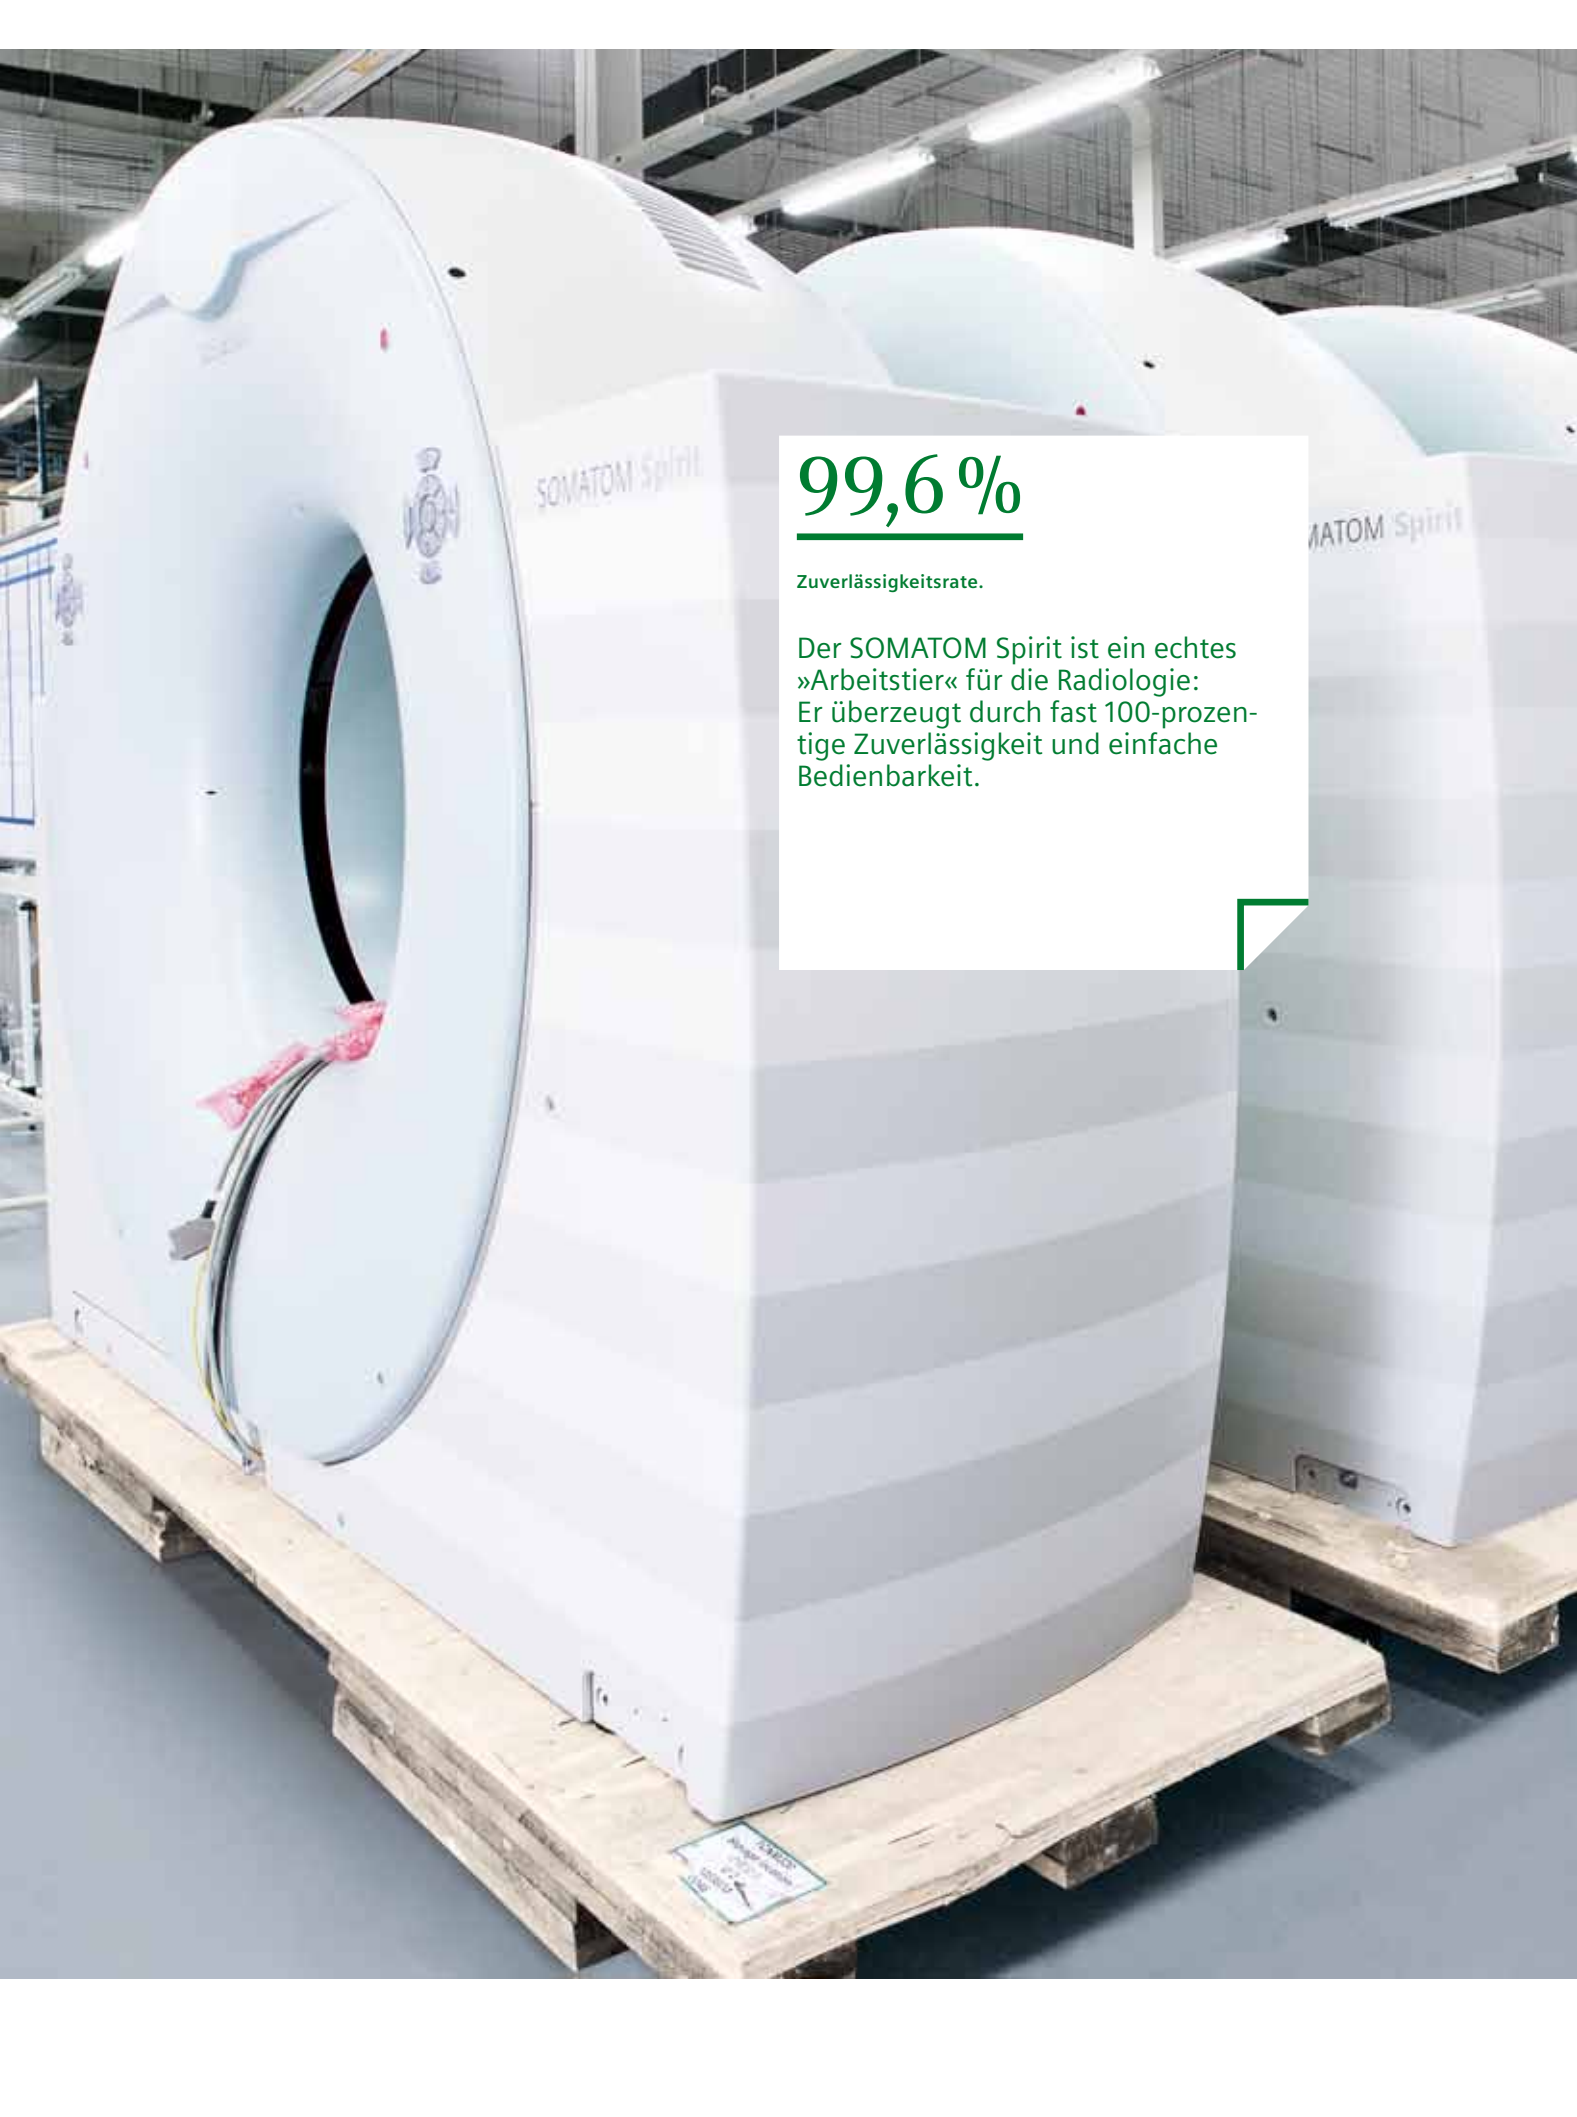

99,6 %

Zuverlässigkeitsrate.

Der SOMATOM Spirit ist ein echtes »Arbeitsstier« für die Radiologie: Er überzeugt durch fast 100-prozentige Zuverlässigkeit und einfache Bedienbarkeit.

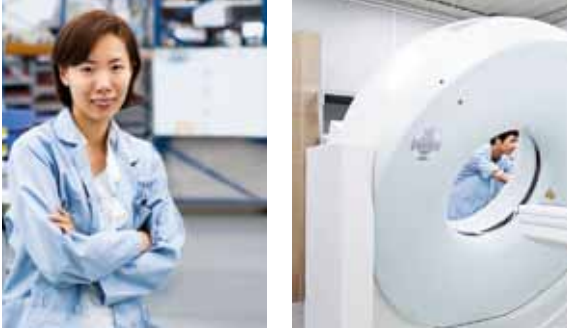

- ^ Fertigungsleiterin Yan Xiao Hua hat das Prinzip der Lean Production (schlanke Produktionslinie) eingeführt – innerhalb von zwei Tagen entsteht so ein fertiges System.
- < Mehrere 100 Systeme des Typs SOMATOM Spirit werden pro Jahr in Shanghai produziert; größter Markt ist China (30 Prozent), gefolgt von Brasilien, Japan und Indien.

Der Zwei-Zeilen-Scanner ist *der* Computertomograph für die Einstiegssegmente, die sogenannten M3-Marktsegmente: verlässlich, schnell – und trotzdem günstig.

Mit diesen Eigenschaften passt der SOMATOM Spirit in die SMART-Strategie von Siemens – »Simplicity, Maintenance friendly, Affordable, Reliable und Timely to market«, also einfach, wartungsfreundlich, preiswert, zuverlässig und schnell am Markt verfügbar.

Rund die Hälfte des Weltwirtschaftswachstums wird in den kommenden Jahren in den BRIC-Staaten Brasilien, Russland, Indien und China sowie im Nahen und Mittleren Osten erzielt. Wichtig für den Erfolg an diesen Märkten sind eine lokale Wertschöpfungskette sowie die direkte Geschäftsverantwortung vor Ort. Denn nur so können wir wirklich nah am Kunden sein.



# 11 km<sup>2</sup>

umfasst die Shanghai Medical Zone.

Hier, im Westen der Stadt, liegt das neue Hauptquartier von Siemens Healthcare. Rund 700 Mitarbeiter arbeiten auf 35.000 Quadratmetern – 350 davon in der Forschung und Entwicklung. Zusätzlich zu Computertomographen und deren Komponenten werden hier auch Angiographiesysteme produziert.

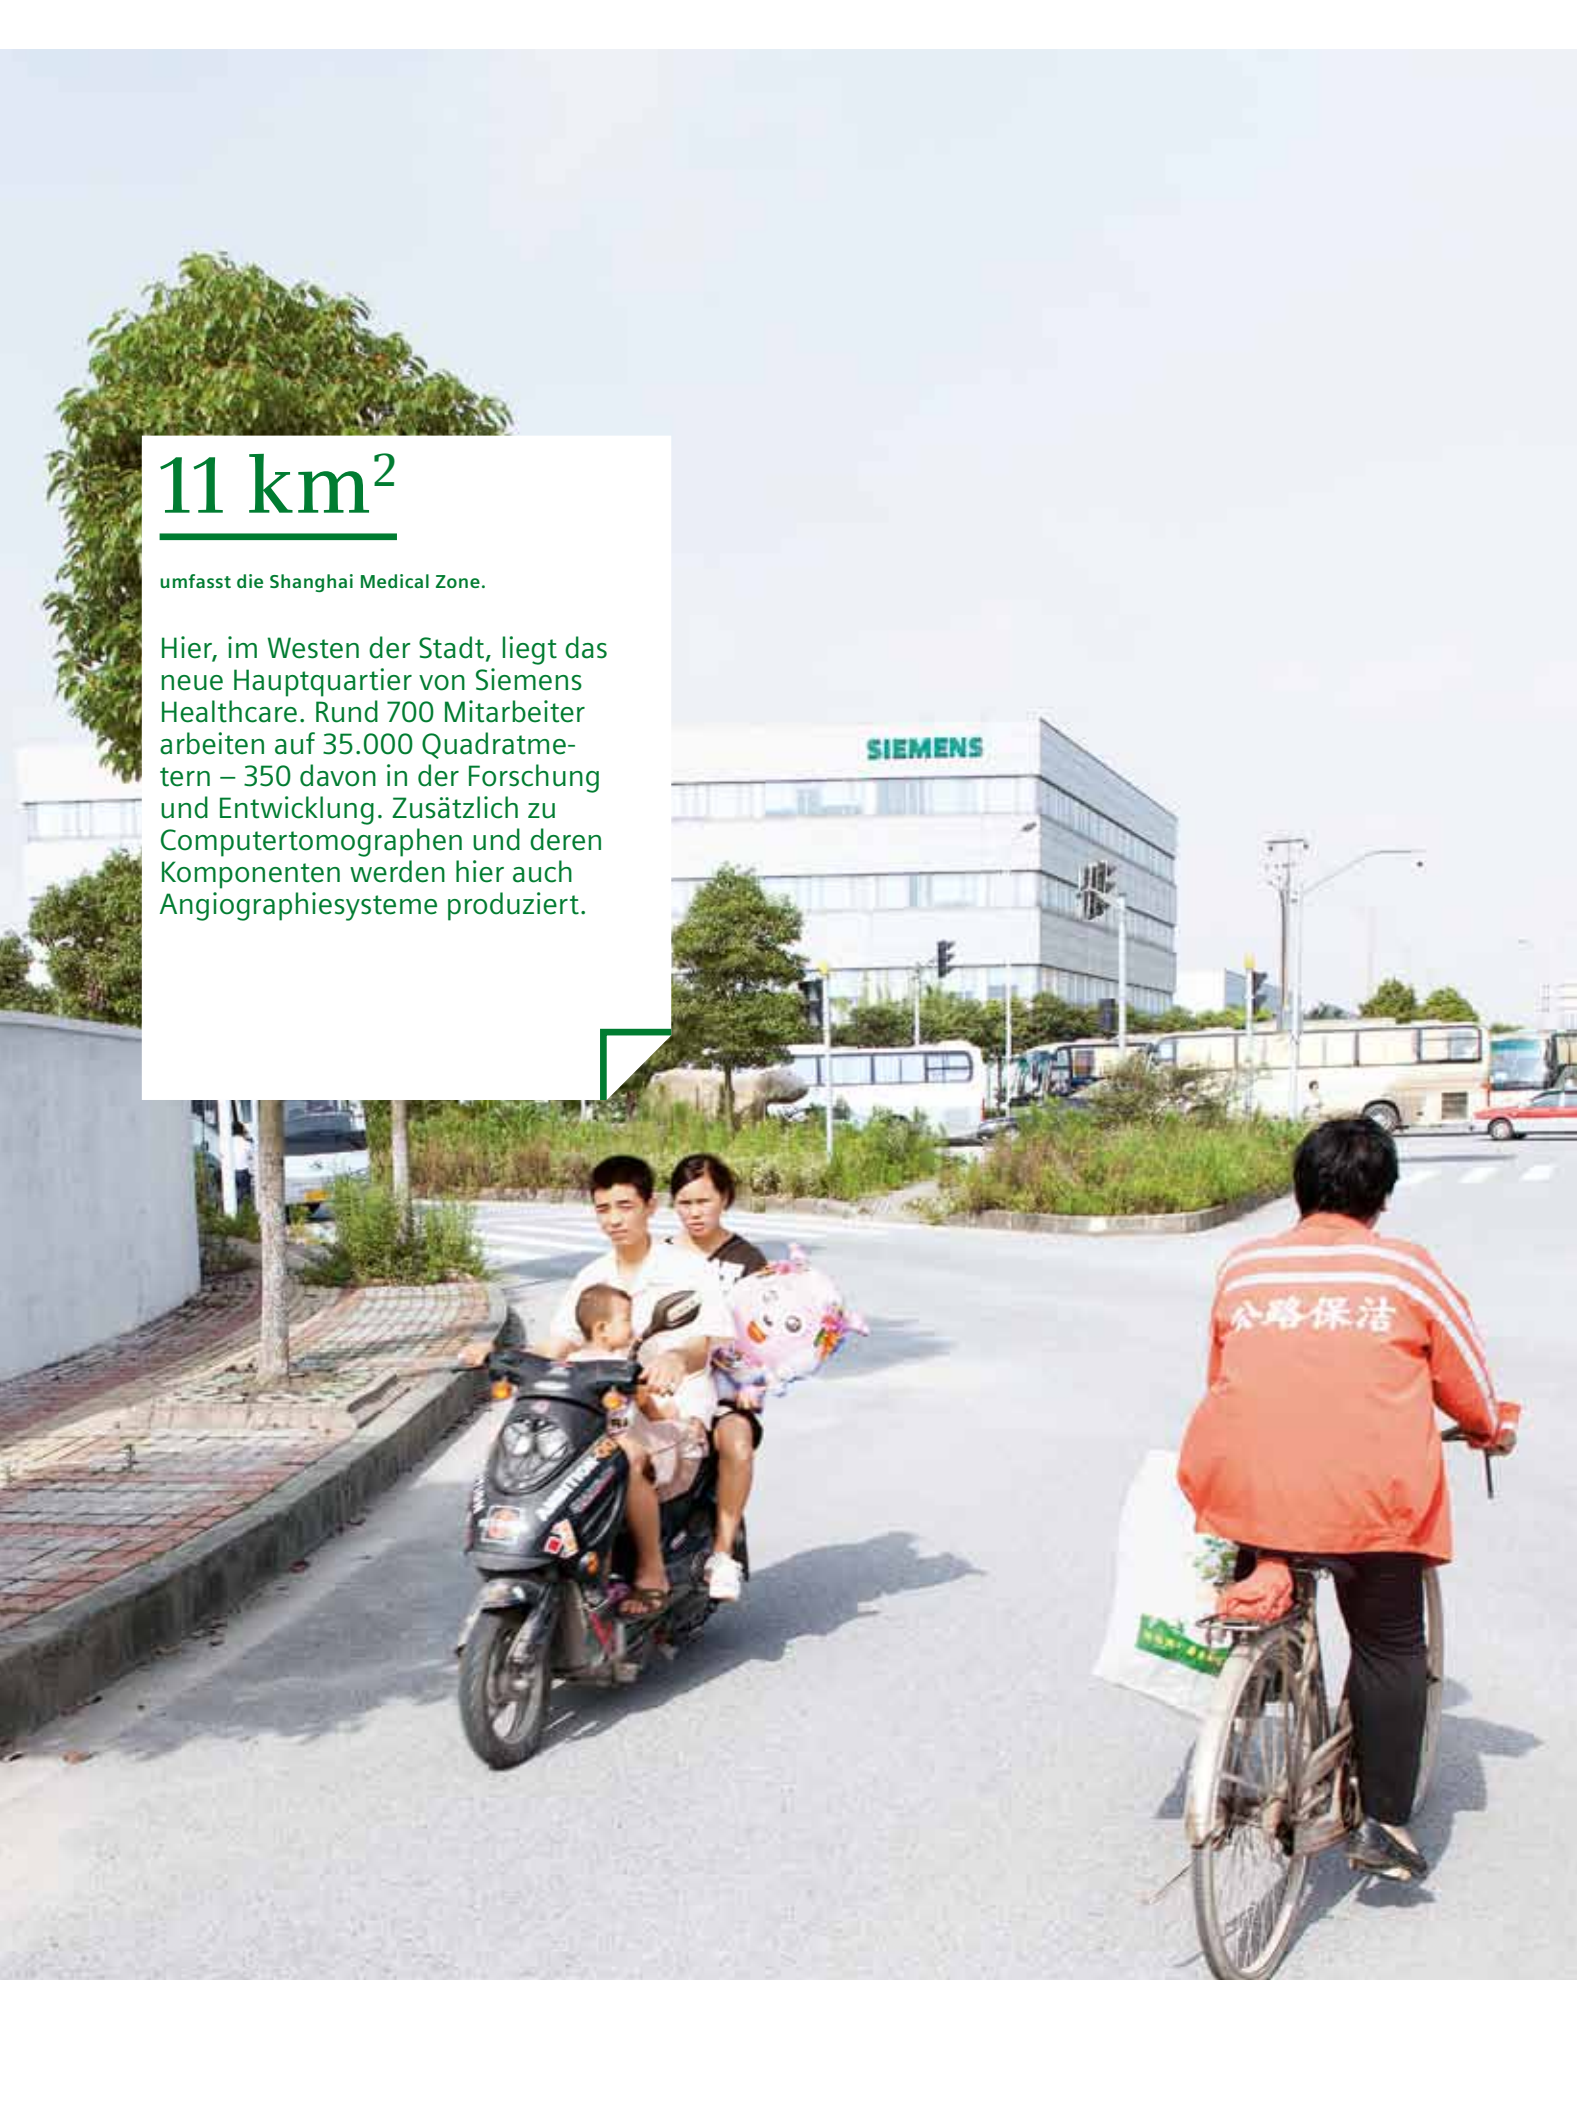



---

## In China fertigt Siemens das erfolgreiche Einsteigerprodukt SOMATOM Spirit – dabei wird rund ein Drittel der Produktion direkt im Land verkauft. Ein System ist im Jiang County People's Hospital in Zentralchina installiert.

Vor zwei Jahren war das Jiang County People's Hospital unter der Leitung von Li Ze Hai das erste Krankenhaus der Region, das sich für den SOMATOM Spirit von Siemens entschieden hat.

**DOPPELTER GEWINN DURCH MODERNSTEN CT**  
Seitdem hat Krankenhausmanager Li diese Entscheidung keine Sekunde lang bereut: »Der SOMATOM Spirit ist unser ganzer Stolz. Unser Krankenhaus verfügt jetzt nicht nur über die modernste Computertomographie der Region – auch unser Gewinn hat sich verdoppelt.«

Mehr als 1.000 Kilometer entfernt von Shanghai gelegen, versorgt das Jiang County People's Hospital die rund 300.000 Menschen der Umgebung. Täglich kommen Patienten, um sich scannen zu lassen – und das ohne Anmeldung. »Früher«, erinnert sich Dr. Zheng Jie Hua, »hat ein solcher Kopfscan noch zehn Minuten gedauert. Aber mit dem SOMATOM Spirit nimmt der ganze Prozess – inklusive Patientenpositionierung und -entlassung – nicht mehr als fünf Minuten in Anspruch.«

## 10.000 SCANS – UND KEIN AUSFALL

Dr. Zhengs Kollegin, die Radiologin Dr. Zhang Yi Qun, betont vor allem die Zuverlässigkeit des Computertomographen: »In den vergangenen zwei Jahren hat es nicht einen Ausfall gegeben – und das bei rund 10.000 Scans.« Regelmäßig warten Servicetechniker von Siemens das System, um das auch in Zukunft zu gewährleisten.

In Shanghai sorgt Fertigungsleiterin Yan Xiao Hua für eine effiziente Herstellung des SOMATOM Spirit. Die Abteilung Supply Chain Management hat die sogenannte Lean Production (schlanke Produktionslinie) für den Scanner eingeführt – und 20 Prozent Zeitersparnis erreicht. Innerhalb von zwei Tagen entsteht so ein fertig montierter SOMATOM Spirit, der anschließend zwei Tage lang gründlich getestet wird, bevor er als eines von mehreren 100 Systemen pro Jahr auf die Reise zum Kunden geht. Dort wird das System nicht nur installiert – Shi Yong Zhen vom Customer Relationship Management sorgt mit einer Basis- und einer Applikationsschulung für das Training der Kunden.

## GEZIELTE STRATEGIE FÜR HETEROGENEN CHINESISCHEN MARKT

Dr. Kong Jun, General Manager für CT in China, war im Jahr 2005 gerade zum Leiter für Forschung und Entwicklung ernannt worden, als der SOMATOM Spirit auf den Markt kam. »Damals war es Zeit für ein Produkt wie den SOMATOM Spirit. Mit ihm konnten wir einen mehrzeiligen Scanner für das Einstiegssegment anbieten«, so Kong. Um den Kundenbedürfnissen noch weiter zu entsprechen, wurde die gesamte Wertschöpfungskette des Produkts – von Forschung und Entwicklung über die Fertigung bis hin zur Logistik – lokal in Shanghai angesiedelt.

Heute sind rund 600 Systeme in China installiert, vor allem in den kleineren, ländlichen Gebieten. Der Kontrast zur modernen »Megacity« Shanghai könnte größer nicht sein – auch in Bezug auf die medizinische Versorgung. »Der Markt in China ist sehr unterschiedlich«, erklärt Florian Belohlavek, Produktmanager für den SOMATOM Spirit. »Während Krankenhäuser in Peking meistens mit High-End-Geräten ausgestattet sind, liegt in den ländlichen Gebieten der Schwerpunkt auf der Basisversorgung.« Und genau auf diese zielt Siemens mit seiner SMART-Strategie (siehe Seite 44) ab.

[www.siemens.com/healthcare](http://www.siemens.com/healthcare)

# Stoßrichtungen

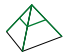

Schaubild Stoßrichtungen  
siehe Seite 11

---

Mit innovativen Produkten und Lösungen kontinuierlich neue Märkte erschließen – das erfordert einen Pioniergeist, wie er unser Unternehmen stark gemacht hat. Es erfordert aber auch klare strategische Prioritäten. Sie geben Orientierung und sind die Grundvoraussetzung für nachhaltiges Wachstum.

Unser Fokus sind innovations- und technologiegetriebene Wachstumsmärkte, an denen wir eine führende Markt- und Technologieposition einnehmen. Und das weltweit, mit lokaler Präsenz und Wertschöpfung vor Ort bei unseren Kunden. Denn unsere Maxime und unser Anspruch sind es, nachhaltig profitabel zu wachsen und den Wettbewerb anzuführen. Hieran arbeiten wir mit innovativen Produkten, Lösungen und Dienstleistungen, mit starken Partnern und einer auf Effizienz und Nachhaltigkeit ausgerichteten Lieferkette.

# »Jeder einzelne Mitarbeiter trägt hier mit seinem persönlichen Einsatz dazu bei, die USA in eine wirtschaftliche Zukunft der ›grünen‹, erneuerbaren Energien zu führen.«

Barack Obama, Präsident der Vereinigten Staaten von Amerika, bei seinem Besuch im Siemens-Werk in Fort Madison am 27. April 2010.

[www.siemens.com/obama-besuch](http://www.siemens.com/obama-besuch)

## Fokus auf innovationsgetriebene Wachstumsmärkte richten

Ein Schlüssel für nachhaltiges Wachstum bei Siemens sind unsere Investitionen in Forschung und Entwicklung. Dafür haben wir im abgelaufenen Geschäftsjahr mit 3.846 Millionen Euro 5,1 Prozent unseres Umsatzes investiert. Rund 30.100 unserer Mitarbeiter forschen und entwickeln an 178 Standorten in rund 30 Ländern für Siemens. An jedem Werktag zählen wir 40 Erfindungen und reichen rund 20 Patente ein. Wir sind stolz auf Rang drei bei der Zahl neuer Patente in Deutschland, Rang zwei in Europa und auf Rang 13 in den USA. Diese Positionen wollen wir weiter verbessern.

Hierzu bedarf es auch einer offenen Innovationsstrategie – »Open Innovation« –, die hilft, weltweit Synergien zu erschließen, die Kosten-, Innovations- und Wettbewerbsvorteile ermöglichen. Jedes Jahr gehen wir mehr als 1.000 Kooperationen mit Universitäten, Forschungseinrichtungen und Industriepartnern ein und stärken so unser Innovationsportfolio weltweit. Siemens treibt unter anderem mit Energieversorgern in Deutschland und Finnland sowie mit renommierten Forschungsinstituten in den Niederlanden die Technologie zur CO<sub>2</sub>-Abscheidung in Kraftwerken weiter voran. Ziel: Marktreife. In einer gemeinsamen Forschungsarbeit mit der Dänischen Technischen Universität Kopenhagen und der Technischen Universität Berlin entstand beispielsweise die Eco-Care-Matrix von Siemens VAI. Mit ihr lassen sich Produktentwicklungen in der Stahlindustrie ob-

jektiv und nachprüfbar danach auditieren, ob sie einen nennenswerten Beitrag zum Umweltschutz leisten und gleichzeitig die Produktivität der Kunden erhöhen. Eine praxisbezogene Form der Forschungskooperation stellen die sogenannten Technology-to-Business-(TTB-)Center dar. Mit dem Ziel, Innovationen voranzutreiben, beteiligt sich Siemens finanziell und fachlich an eigenständigen jungen Unternehmen, die eng mit unseren Partneruniversitäten zusammenarbeiten. Das TTB in Berkeley, Kalifornien, ist ein gutes Beispiel: Hier nahm die von Siemens entwickelte IWLAN-Datenübertragungstechnik für die Fertigungsindustrie ihren Ursprung.

Im Sektor Healthcare wiederum entwickelt Siemens mit Partnern unter anderem neuartige Phasen-Kontrast-Röntgensysteme, die unterschiedliche Weichteilgewebe bis ins kleinste Detail wiedergeben können und auf diese Weise Diagnosen präziser machen sollen. Nachhaltig angelegte Siemens-Entwicklungsprojekte folgen den Megatrends. So forcieren wir beispielsweise die Entwicklung von Lösungen, mit denen die Qualität der Gesundheitssysteme in aller Welt gesteigert werden soll. Zusätzlich zum früheren Erkennen und Behandeln von Krankheiten geht es auch um die effektive Verarbeitung medizinischer Daten zum Wohl der Patienten.

Der Klimawandel stellt uns vor die Herausforderung, den Energieverbrauch von der wirtschaftlichen Entwicklung abzukoppeln, um die ehrgeizigen Klimaziele weltweit zu erreichen – durch ener-

## 15 Prozent des europäischen Bedarfs an Strom

aus erneuerbaren Energien decken –

so lautet das ehrgeizige Ziel eines Industriekonsortiums,  
an dem Siemens als Gründungsmitglied und Technologiepartner beteiligt ist.

gieeffiziente Antriebe und Beleuchtung, durch intelligente Gebäudetechnik und durch softwaregesteuerte Industrieproduktion. Gleichzeitig wächst die Nachfrage nach Lösungen für eine CO<sub>2</sub>-neutrale Energieproduktion. Wir haben deshalb in den vergangenen Jahren unser Portfolio auf diesem Gebiet erweitert. Auch hierbei verfolgen wir das unseren Akquisitionen zugrunde liegende Prinzip, die erste oder zweite Position bei Technologien und an Märkten zu erreichen. Dies ist die Voraussetzung für Profitabilität und Wachstum und damit für eine nachhaltige Steigerung des Unternehmenswerts. Beispielsweise sind wir bei der Solartechnik ein wichtiger Lieferant für Dampfturbinen, Elektro- und Leittechnik, Wechselrichter, für Generatoren und Systeme zur Kühlung der Solarkraftwerke. Unsere Elektro- und Automatisierungstechnik ermöglicht zudem eine effiziente und hochwertige Produktion der Solarspiegel und Receiver. Im Frühjahr 2009 haben wir uns bereits mit rund 30 Prozent an dem italienischen Unternehmen Archimede Solar beteiligt. Damit haben wir uns Kernkomponenten in der Solartechnologie von morgen gesichert. Durch die Akquisition der Firma Solel Solar zu Beginn des Geschäftsjahrs 2010 sind wir zum Komplettanbieter geworden.

Als Mitglied eines Industriekonsortiums beteiligt sich Siemens an der Planung großer solarthermischer Kraftwerke und Windparks in den Wüstenregionen Nordafrikas. Das damit verbundene und unter dem Namen »DESERTEC« bekannte Konzept sieht vor, mit dem umweltfreundlich erzeugten

Strom große Teile des Bedarfs der Erzeugerländer und im Endausbau auch 15 Prozent des Strombedarfs Europas abzudecken. In diesen vielversprechenden Zukunftsmarkt können wir unser großes Know-how in der Solarthermie, der Windenergie und bei der Stromübertragung einbringen. Projekte wie diese stellen die Stromnetze vor neue Herausforderungen: Künftig müssen große Mengen an schwankendem Wind- und Solarstrom integriert und immer mehr kleine dezentrale Energieerzeuger eingebunden werden. Dafür ist ein intelligentes Netz (»Smart Grid«) erforderlich, das Stromproduktion und -verteilung im Gleichgewicht hält. Zur Realisierung der exzellenten Marktchancen in diesem Bereich hat Siemens das Konzernprojekt Smart-Grid-Anwendungen eingerichtet. Es bündelt das Siemens-Know-how mit dem Ziel, unseren Umsatz mit Smart-Grid-Technologien in Zukunft noch weiter zu steigern. Großes Potenzial in diesem Zusammenhang bieten beispielsweise Gebäude, die sich zunehmend vom reinen Energiekonsumenten zu aktiven Teilnehmern am Strommarkt wandeln, die Energie speichern und sogar selbst erzeugte Elektrizität anbieten (»Smart Buildings«).

Dass wir auf diesen Feldern gut aufgestellt sind, zeigt unser Umweltportfolio: Mit einem Geschäftsvolumen von insgesamt rund 28 Milliarden Euro ist es nicht nur die weltweite Nummer eins bei »grünen« Technologien, sondern auch in dreifacher Hinsicht gewinnbringend: Erstens für unsere Kunden, die ihren Unternehmenserfolg steigern – dank niedrigerer Energiekosten, höherer Produktivität und profitablen Wachstums. Zweitens für die Gesell-

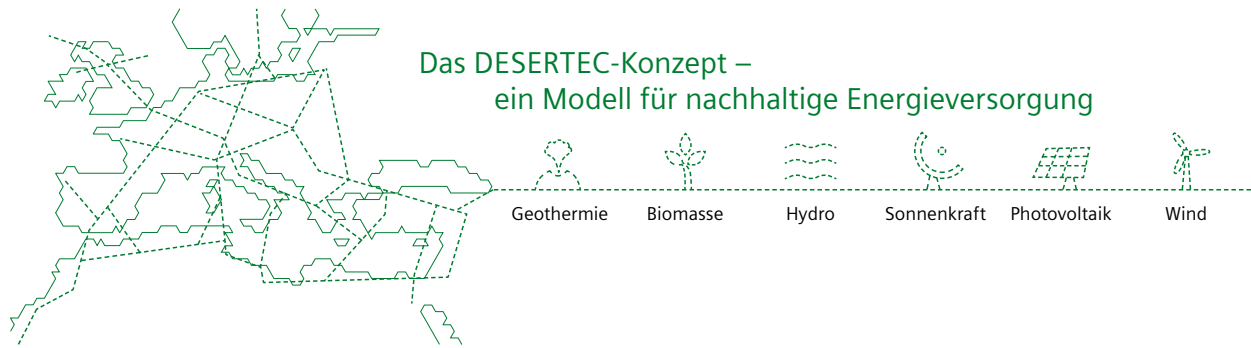

## Das DESERTEC-Konzept – ein Modell für nachhaltige Energieversorgung

schaft, für die sich mit unseren Technologien die Umwelt schützen und die Lebensbedingungen verbessern lassen. Drittens für Siemens, da wir attraktive Märkte erschließen und profitabel wachsen können. Als »grüner Infrastruktur-Pionier« sind wir unter anderem Marktführer in der zukunftsweisenden Offshore-Windenergie, Produzent des Hochgeschwindigkeitszugs Velaro, einer der führenden Lieferanten effektiver und verlustarmer Stromnetze sowie Anbieter des »Energy Contracting«, eines intelligenten Finanzierungsmodells zur nachhaltigen Modernisierung von Gebäuden.

Die Märkte für erneuerbare Energien, Umwelttechnologien und Energieeffizienz werden in den kommenden Jahren und Jahrzehnten überdurchschnittlich schnell wachsen. Siemens forciert sein Engagement hier ebenso systematisch wie in den Schwellenländern. Denn die BRIC-Staaten Brasilien, Russland, Indien und China sowie die Länder des Nahen und Mittleren Ostens stehen im Zuge ihres erwarteten Wachstums vor großen Infrastrukturaufgaben. Diese Potenziale nutzen wir mit leistungsfähigen technologischen Lösungen, die zudem Ressourcen schonen. Siemens ist in der Lage, überall auf der Welt Häfen, Flughäfen, Bahnhöfe, Fern- und Nahverkehrszüge, Verkehrs- und Sicherheitszentralen, Krankenhäuser, Sport- und Vergnügungsstätten, öffentliche Verwaltungen und andere Großbauten zu liefern beziehungsweise mit wichtigen Technologien auszustatten. Dass wir es nicht dabei belassen, sondern umfangreiche Servicedienstleistungen über den gesamten Lebenszyklus unserer

Produkte anbieten, steigert unsere Wettbewerbsposition zusätzlich. Denn das Gesamtpaket von Produkt und Serviceleistung wird gerade an stark umkämpften Märkten zum Differenzierungs- und damit zum Entscheidungskriterium unserer Kunden vor Ort.

## Starker Partner unserer Kunden vor Ort sein

Kunden und Öffentlichkeit nehmen Siemens in vielen Ländern als einheimisches Unternehmen wahr. Auch außerhalb unseres Heimatlands Deutschland sind immer mehr Menschen in zweiter oder dritter Generation bei Siemens tätig. Den weiteren Ausbau der weltweiten Präsenz der Marke Siemens und die Stärkung unserer Partnerschaften vor Ort haben wir als einen der entscheidenden Treiber für unseren Geschäftserfolg der Zukunft qualifiziert.

Siemens beschäftigt rund 405.000 Mitarbeiter in rund 190 Ländern der Erde. Wenige Jahre nach der Gründung 1847 eröffneten die ersten Niederlassungen in Großbritannien (1850), Russland (1855), Frankreich (1878) und Österreich (1879). Bereits 1881 galt Siemens für damalige Verhältnisse als »Global Player«, denn rund 63 Prozent der 2.400 Mitarbeiter waren außerhalb des Heimatmarkts Deutschland tätig. Heute arbeiten mehr als 68 Prozent der Siemens-Mitarbeiter außerhalb Deutschlands.

Chinas Premier Wen Jiabao besuchte das Siemens-Werk in Tianjin  
und zeigte sich beeindruckt von der Weltklassequalität  
der Siemens-Produkte und -Produktionsprozesse.  
Er bezeichnete **Siemens als chinesisches Unternehmen.**

---

Der Erfolg von Siemens ist eng verbunden mit der großen persönlichen Nähe zu Märkten mit Potenzialen. Vor Ort können wir am besten auf neue und sich ändernde Anforderungen reagieren. Deshalb engagieren wir uns besonders in den schnell wachsenden Schwellenländern wie auch den Ländern des Nahen und Mittleren Ostens. Wir haben uns zum Ziel gesetzt, hier unseren Umsatz Jahr für Jahr überproportional zu steigern. Die optimale Nutzung der Wachstumschancen in den BRIC-Staaten erfordert dabei mehr als lokale Präsenz. Um weltweit stärker zu wachsen, dafür gibt es bei Siemens die SMART-Initiative. Sie verfolgt das Ziel, Produkte, Lösungen und Dienstleistungen für die sehr schnell wachsenden Einstiegssegmente anzubieten. SMART steht für »Simplicity«, »Maintenance friendly«, »Affordable«, »Reliable« und »Timely to market« – also: einfach, wartungsfreundlich, kostengünstig, zuverlässig und zeitnah am Markt.

Ein weiterer logischer Schritt zur nachhaltigen Stärkung der Partnerschaft mit unseren Kunden ist das lokale Unternehmertum bei Siemens. Hierzu geben wir unseren Unternehmern vor Ort den notwendigen Freiraum für ihre Entscheidungen und verstärken gezielt unsere Verantwortlichkeiten für Produktmanagement, Entwicklung, Einkauf und Produktion. Das Geschäft mit dem Computertomographen SOMATOM Spirit (siehe auch Seite 32 ff.) betreibt Siemens beispielsweise direkt in China statt in Europa oder in den USA. Für Einstiegsmärkte konzipiert, bietet das Gerät zu einem wettbewerbsfähigen Preis Basisfunktionen bei einfacher Bedie-

nung. Entwickelt wurde es größtenteils in Shanghai, 90 Prozent der Bauteile kommen vom chinesischen Markt; das Gerät wird komplett in China gefertigt. Das Feedback unserer Kunden in den Schwellenländern erweitert zudem das Know-how unserer Mitarbeiter in Bezug auf Produkteigenschaften und Kostenoptimierung. Dies wird langfristig der Entwicklung unserer Produkte für die oberen Preissegmente zugutekommen.

Wir wollen die Kunden an den neuen Märkten dauerhaft an Siemens binden; hierzu bedarf es besonderer Anstrengungen beim Aufbau lokaler Service-netzwerke. Mit perfektem Service vor Ort wollen wir eine anhaltende Kundenzufriedenheit erreichen, die Siemens bei allen Folgeinvestitionen zur ersten Wahl macht. Denn Kundennähe und Kundenbindung entstehen nicht nur über den Vertrieb, es sind vor allem unsere Servicemitarbeiter vor Ort, die, aufbauend auf bisweilen jahrzehntelangen Beziehungen, die Wünsche und Bedürfnisse unserer Kunden genau kennen – ein Wissen, das unentbehrlich ist und uns von vielen Wettbewerbern unterscheidet. Service bei Siemens ist hoch diversifiziert und ein wichtiger Wachstumstreiber. Er trägt entscheidend zur Profitabilität bei und erzeugt verlässliche Einnahmen mit hohen Margen, und dies bei geringerer Kapitalintensität als andere Geschäftsarten. Zudem ist er unter anderem aufgrund von Langzeitverträgen weniger konjunkturanfällig. Um unser enormes Potenzial im Service weiter auszuschöpfen, investieren wir weltweit. Zudem erweitern wir konsequent unser Angebot



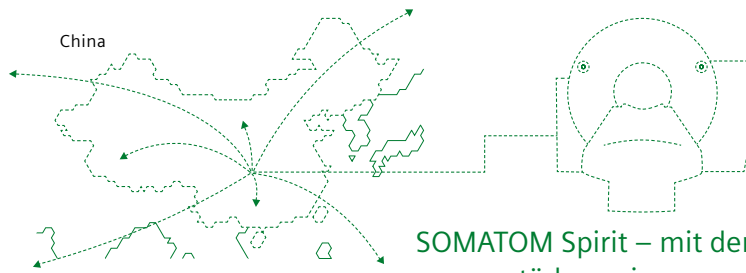

SOMATOM Spirit – mit dem Computertomographen stärken wir unsere Position an den Wachstumsmärkten.

von hoch entwickelten Servicetechnologien und innovativen Dienstleistungen.

Wir sind überzeugt, dass gerade vor dem Hintergrund steigender Produktstandardisierung Service ein wichtiges strategisches Differenzierungsmerkmal im Wettbewerb ist. Servicedienstleistungen gewährleisten den reibungslosen Betrieb der installierten Basis beziehungsweise optimieren ihn. Daran sind unsere Kunden gerade in ökonomisch schwierigeren Zeiten interessiert. Service bringt Siemens nah an den Kunden, und dies über den gesamten Lebenszyklus eines Produkts hinweg – ein wichtiger Grund, warum wir vor allem auch in serviceintensiven Segmenten wachsen wollen und bei Portfolioerweiterungen immer auch den Anteil an potenziellen Serviceleistungen mit in die Überlegungen einbeziehen.

Ein starker Partner unserer Kunden vor Ort zu sein, das heißt für uns stets, die Geschäftsprozesse unserer Kunden und von deren Kunden bis ins Detail zu kennen und durch intelligente Lösungen ihre spezifischen und individuellen Anforderungen zu erfüllen. Unsere Mitarbeiter vor Ort haben über Jahre und Jahrzehnte hinweg Vertrauen aufgebaut. Vertrauen in die Zuverlässigkeit und die Qualität unserer Produkte. Vertrauen in die Innovationskraft unseres Unternehmens. Vertrauen in den Namen Siemens.

Das ist ein Kapital, auf das wir stolz sind und das wir nachhaltig mehrten wollen. Unsere Präsenz an allen

relevanten Märkten der Welt, ein global agierender Vertrieb – gesteuert von unseren Clustern und Regionalgesellschaften – und das breit gefächerte Siemens-Portfolio für anspruchsvollste Herausforderungen sind die beste Voraussetzung hierfür. Mit Siemens One bündeln wir konzernweit das gesamte Leistungsspektrum unseres Unternehmens und passen es zugleich an die Bedürfnisse unserer Kunden an. So entstehen maßgeschneiderte Komplettlösungen – etwa für Flughäfen, Hotels, Krankenhäuser oder ganze Stadtteile. Diese Bündelung unserer Kräfte ist eine wesentliche Voraussetzung dafür, unsere Wettbewerber auf Dauer zu übertreffen.

Damit wir immer wissen, wo wir im Wettbewerb stehen und welche Potenziale wo auf uns warten, betreibt Siemens ein differenziertes Benchmarking. Sich dabei allein mit globalen Wettbewerbern zu messen würde zu kurz greifen. Unsere Benchmark-Analysen bilden daher immer mehr regionale Marktsituationen mit lokalen Anbietern ab. So erkennen wir die wesentlichen Faktoren zur Stärkung unserer Wettbewerbsfähigkeit. Mithilfe aktueller Benchmark-Analysen wollen wir sicherstellen, dass Siemens an allen regionalen Märkten und in allen Sektoren führende oder mindestens zweite Plätze im Wettbewerb um Marktanteile und Technologiepositionen einnimmt. Bei der Versorgung mit Produkten und Leistungen werden für Siemens die Schwellenländer mit ihren aufstrebenden Märkten immer wichtiger. Dabei geht es nicht allein um Kosten. Wir wollen die gesamte Wertschöpfungskette vom Lieferanten bis zum Kunden so gestalten,

Siemens ist der ideale Arbeitgeber für Menschen,  
die den **Mut haben, Fragen zu stellen.**  
Denn das macht uns zu dem Unternehmen, das Antworten hat –  
auf die Herausforderungen von heute und von morgen.

---

dass wir überall auf der Welt so fest verankert und gut vernetzt sind wie ein lokaler Anbieter.

Es ist uns bewusst, dass wir auf die Gesellschaft und die Umwelt in unseren Beschaffungsmärkten einen bedeutenden Einfluss ausüben. Nachhaltigkeit in der Lieferkette ist insofern ein entscheidendes Kriterium. Das beginnt schon bei der Auswahl unserer Lieferanten, bei der wir bereits potenzielle Zulieferer verpflichten, unsere eigenen strengen Grundsätze einzuhalten und deren Umsetzung auch in der eigenen Lieferkette zu fördern. Dass unsere Anstrengungen auf diesem Feld Beachtung finden, zeigte sich bereits im Geschäftsjahr 2009: Unser Nachhaltigkeitsmanagement in der Lieferkette wurde beim renommierten SAM Dow Jones Sustainability Index mit der höchsten Platzierung beim Kriterium »Standards for Suppliers« gewürdigt.

Wir wollen auch in Zukunft konzernweit eine nachhaltige Lieferantenbasis sicherstellen. Zu diesem Zweck verbessern wir kontinuierlich und funktionsübergreifend unsere Methoden, Prozesse und Systeme. So minimieren wir aktiv Risiken und tragen durch die Weitergabe des entsprechenden Know-hows an unsere Lieferanten dazu bei, nachhaltiges Handeln in unserer Lieferkette umzusetzen.

## Die Kraft von Siemens nutzen

Wir wollen dauerhaft besser sein als unsere Wettbewerber. Dies gelingt nur mit innovativen Produkten, passgenauen Lösungen für unsere Kunden, verbindlichen Verhaltensgrundsätzen für unser Handeln und Tun und vor allem leidenschaftlichen Mitarbeitern. Kurzum: mit der gemeinsamen Kraft von Siemens.

Siemens beschäftigt Menschen, die die Welt von morgen prägen. Ihr Know-how und ihre Leidenschaft zählen zu den wichtigsten Faktoren für den langfristigen Wettbewerbserfolg. Deshalb beachten wir die relevanten internationalen Standards, sichern Beschäftigung in wirtschaftlich schwierigen Zeiten und investieren in die Weiterbildung – im Geschäftsjahr 2010 rund 225 Millionen Euro; dies entspricht rund 560 Euro pro Mitarbeiter. Unsere anspruchsvollen Aus- und Weiterbildungsprogramme sind gezielt auf die strategisch bedeutenden Kenntnisse und Fähigkeiten ausgerichtet und tragen dafür Sorge, Kompetenzen innerhalb wichtiger Funktionen weltweit einheitlich zu vermitteln – und dies über den ganzen Berufsweg hinweg. Denn lebenslanges Lernen ist in einer globalisierten Welt unabdingbar.

Als weltweit agierender integrierter Technologiekonzern sind wir darauf angewiesen, Talente zu gewinnen und ihnen ein Umfeld zu schaffen, in dem sie ihre Fähigkeiten entfalten und einbringen kön-

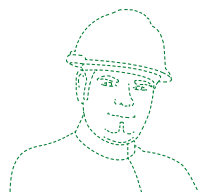

Yusuf Al-Ghamdi

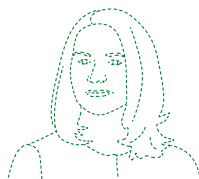

Kristy Myers

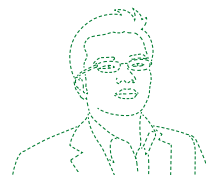

Liu Xiang

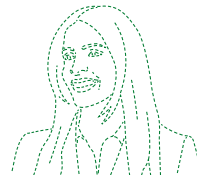

Ghada Trotabas

Als Siemens-Mitarbeiter tragen wir jeden Tag dazu bei,  
Antworten auf die Herausforderungen unserer Zeit zu geben. [www.siemens.com/karriere](http://www.siemens.com/karriere)

nen. Basis hierfür sind einheitliche Kriterien, anhand derer wir die Kompetenzen und das Potenzial der Mitarbeiter mit den Anforderungen der jeweiligen neuen Positionen in Einklang bringen. Der neue Siemens Leadership Framework (SLF) hilft uns dabei. Studien belegen, dass vielfältig zusammengesetzte Teams mit ihren unterschiedlichen Fähigkeiten, Erfahrungen und Qualifikationen den Ideenreichtum eines Unternehmens mehren. Diversity ist bei Siemens eine wichtige Säule der Geschäftsstrategie. Wir setzen auf Vielfalt, um die besten Köpfe der Welt für uns zu gewinnen und auch weiterhin unsere Innovationskraft zu stärken. Wir möchten die vielfältige Zusammensetzung unserer Kunden widerspiegeln und damit für Siemens Wettbewerbsvorteile schaffen. Unsere Vielfalt mit rund 405.000 Frauen und Männern unterschiedlicher Herkunft, kultureller und religiöser Prägung, ethnischer und gesellschaftlicher Hintergründe sowie unterschiedlicher Erfahrungen und Expertise macht Siemens besonders stark.

Die Kraft von Siemens nutzen: Hierzu gehört ein klares und unmissverständliches Bekenntnis zur Integrität. Dessen Kern und Ankerpunkt bilden unsere Werte: Verantwortungsvoll – Exzellent – Innovativ.

Wir erfüllen alle gesetzlichen Anforderungen und übertreffen sie, wo und wann wir es können. Verstöße akzeptieren wir unter keinen Umständen.

Darüber hinaus haben wir uns eindeutige und verbindliche Verhaltensgrundsätze gegeben. Sie decken alle Bereiche unserer unternehmerischen Aktivitäten ab. Gleichzeitig setzen sie Standards und definieren unternehmensweit eindeutige Verantwortungsbereiche. Hierzu gehören die kompromisslose Bekämpfung der Korruption genauso wie das Thema Arbeitssicherheit und Gesundheitsmanagement sowie der Schutz der natürlichen Ressourcen.

Zusätzlich zu unserem Anspruch, unsere Kunden mit energieeffizienten und umweltfreundlichen Technologien auszustatten, haben wir das Ziel, noch umweltfreundlicher zu werden. Ein eigenes Umweltschutzprogramm mit eindeutigen Managementvorgaben setzt hier ein unmissverständliches Zeichen.

An unsere Geschäftspartner, Lieferanten und Interessenvertreter stellen wir hohe Anforderungen: Wir verlangen von ihnen, jederzeit und überall mit Siemens vergleichbare Standards in der Geschäftsethik anzuwenden. Energieeffizienzprogramme und Nachhaltigkeitsaudits sind nur zwei Beispiele, wie wir hierfür Sorge tragen. Denn Menschen- und Arbeitnehmerrechte sowie Umweltschutz-, Arbeitssicherheits- und Antikorruptionsbestimmungen einzuhalten: Das ist Grundvoraussetzung für verantwortungsvolles unternehmerisches Handeln und Fundament einer gelebten Integritätskultur.

# Elektromobilität – der Übergang vom Öl- zum Stromzeitalter

Reportage 3

---

## Die Kraft von Siemens nutzen

Welches Potenzial ein ganzheitlicher Ansatz bietet, zeigt das Beispiel Elektromobilität. Konzernübergreifend arbeiten Ingenieure und Wissenschaftler gemeinsam mit externen Partnern daran, dem Thema der Zukunft zum Durchbruch zu verhelfen – mit innovativen Technologien und Lösungen über die gesamte Prozesskette hinweg.

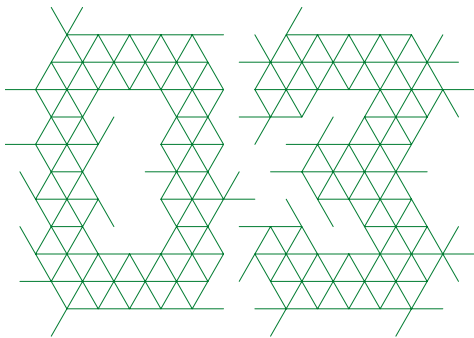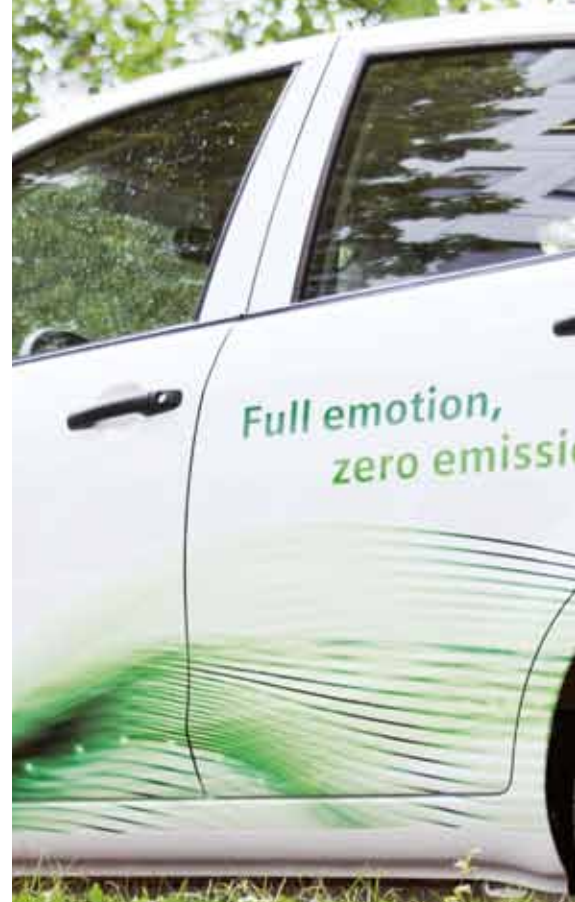



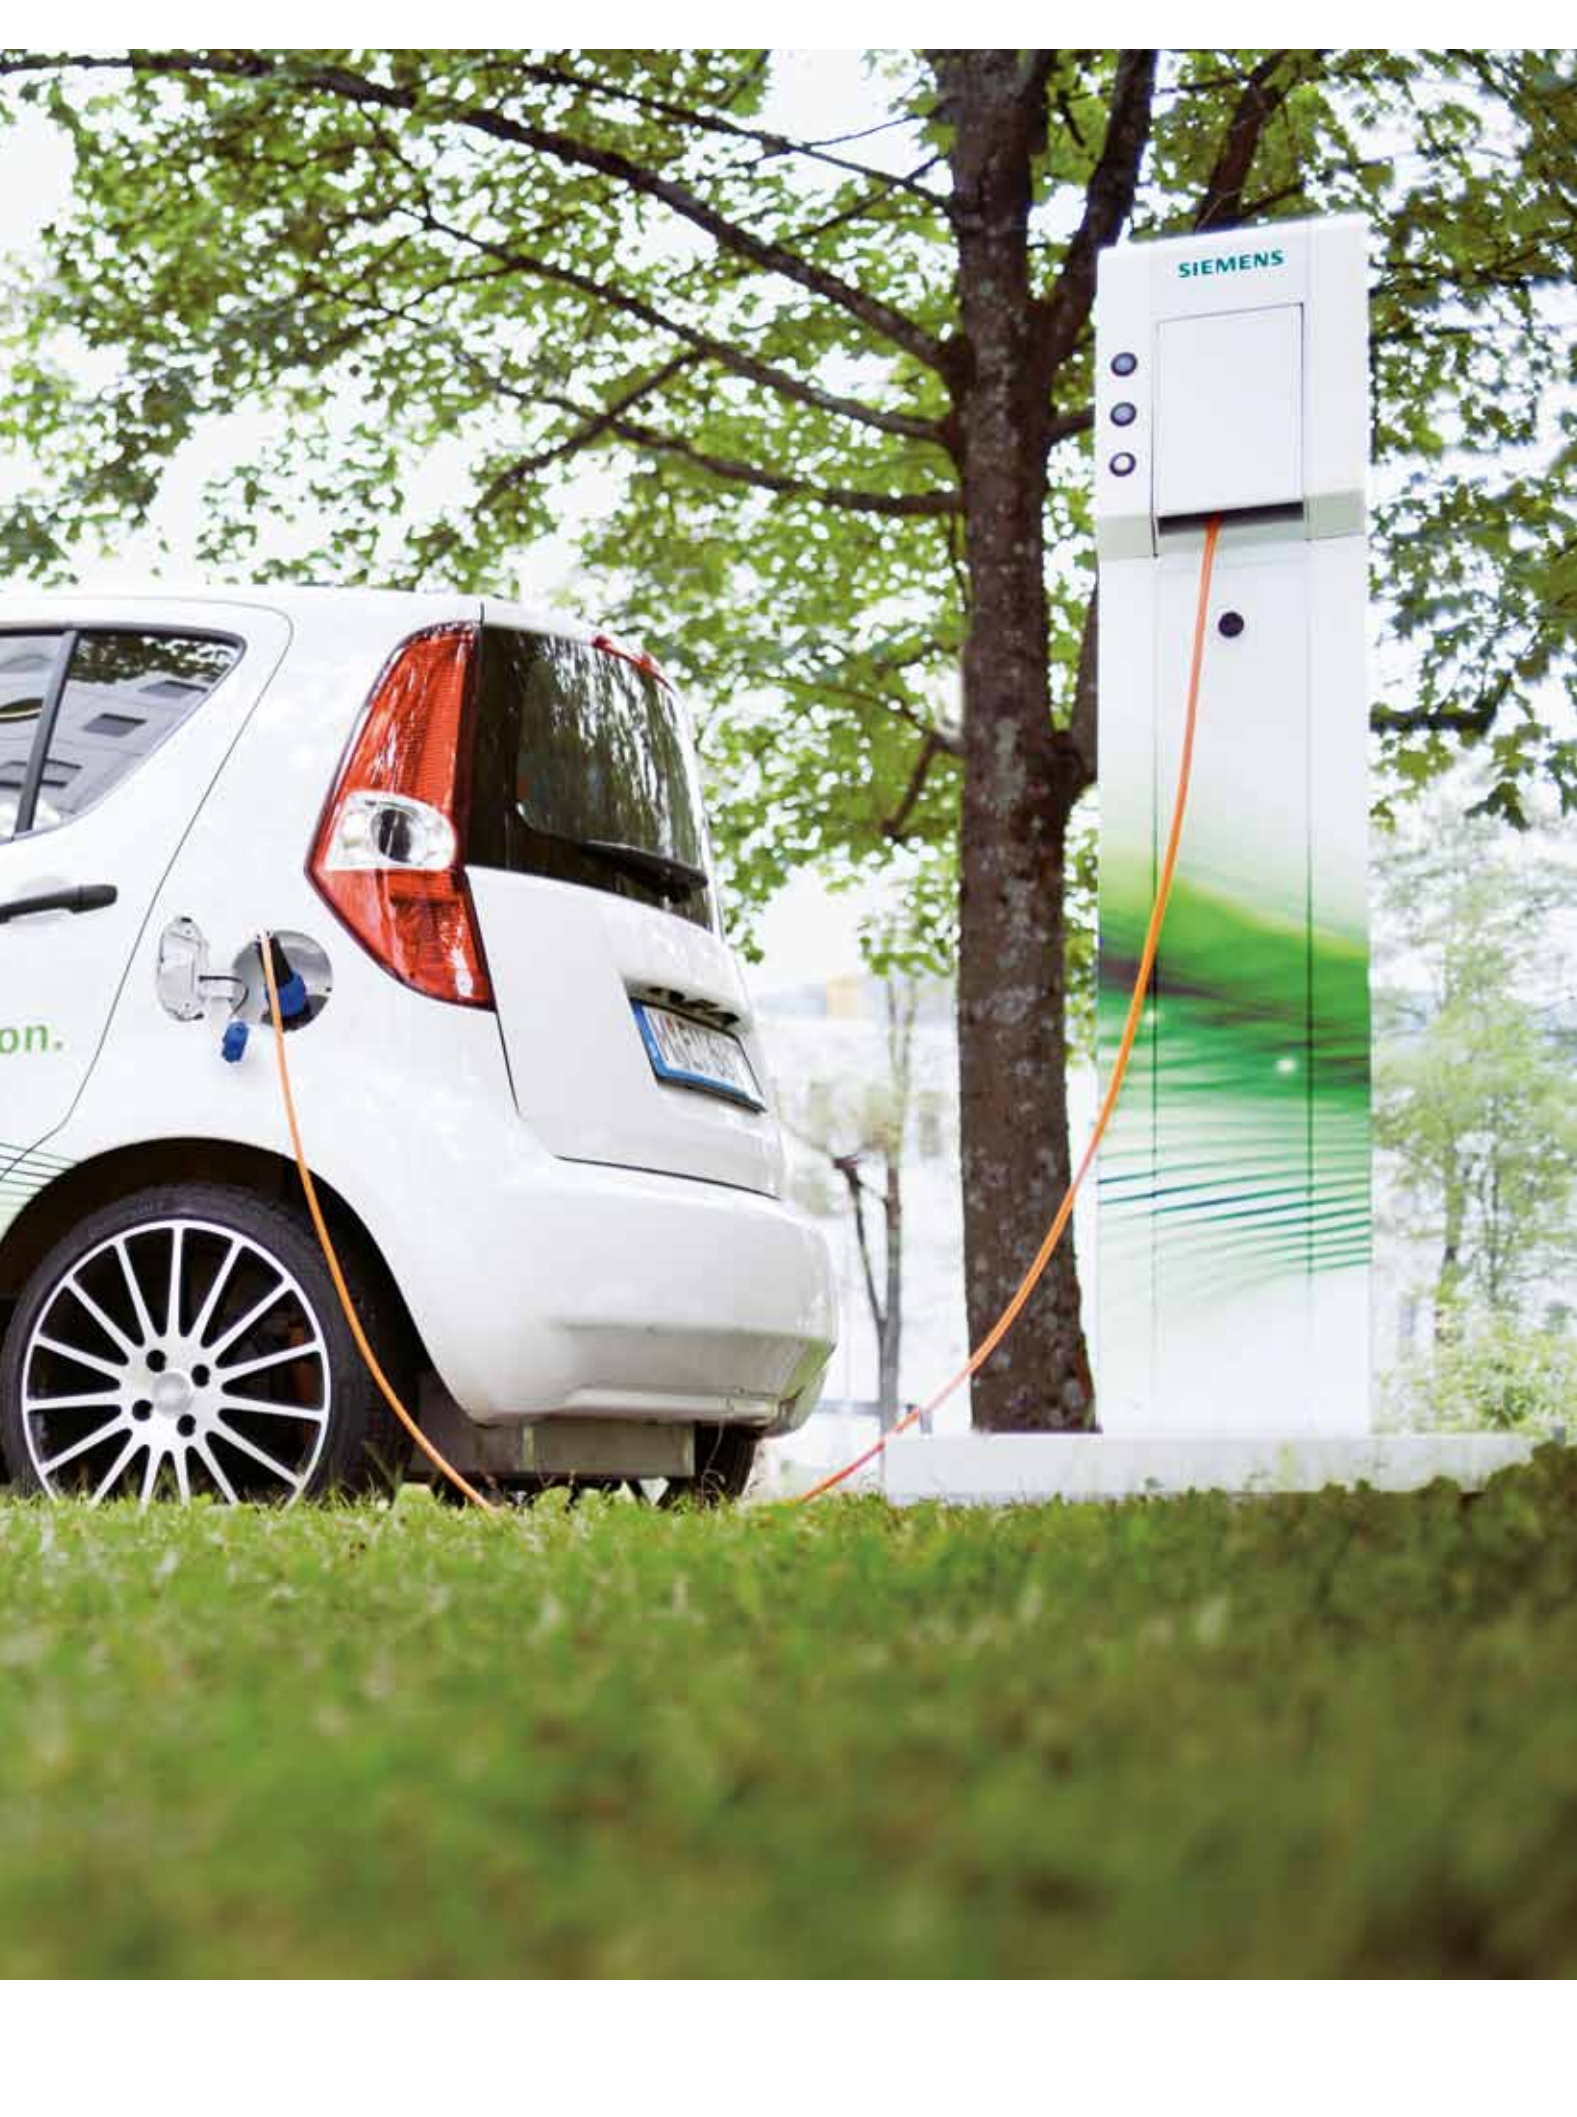

- > Die Fahrzeuge der Elektroflotte werden von Siemens regelmäßig gewartet und überprüft, um einen reibungslosen Betrieb zu gewährleisten. Hier ist zu sehen, wie am Fahrzeugprüfstand in München das Hochvolt-Antriebssystem untersucht wird.
  - √ Andreas Romandi leitet das Pilotprojekt Flottentest in der zentralen Siemens-Forschung.
- 

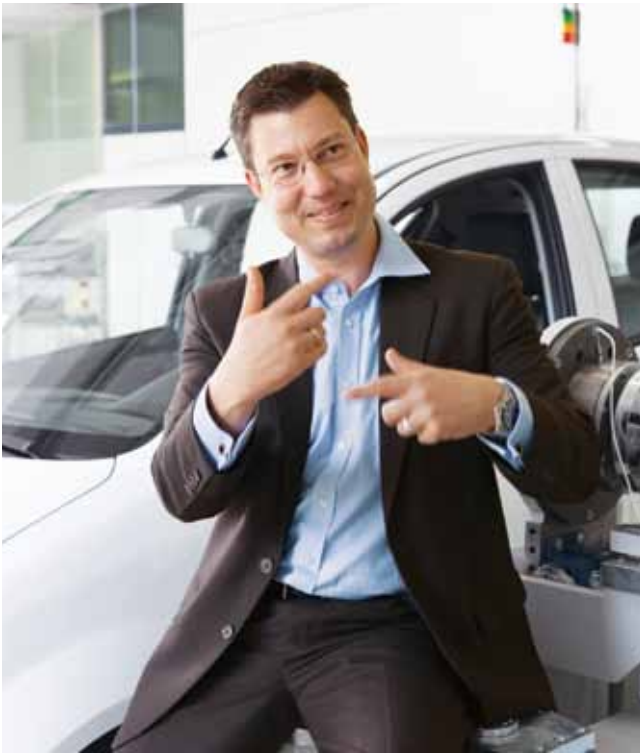

Siemens-Mitarbeiter an den Standorten Erlangen und München testen 100 Elektroautos in einem großen Flottentest.

Projektleiter Andreas Romandi: »Mit unserem Pilotprojekt wollen wir einen ersten Schritt in Richtung eines integrierten Gesamtsystems aus intelligentem Stromnetz, moderner Datenverarbeitung und Elektroautos gehen. Ziel ist es, mehr über die optimale Kombination von modernem Stromnetz und mobilem Energiespeicher Elektroauto zu lernen.«



# 150

Experten für Elektromobilität.

Die einen forschen, entwickeln und testen die Technik an Fahrzeugen, andere optimieren und konstruieren die Infrastruktur für Energieerzeugung und -verteilung, die Ladetechnologien und die Kommunikation zwischen Energienetz und Auto.

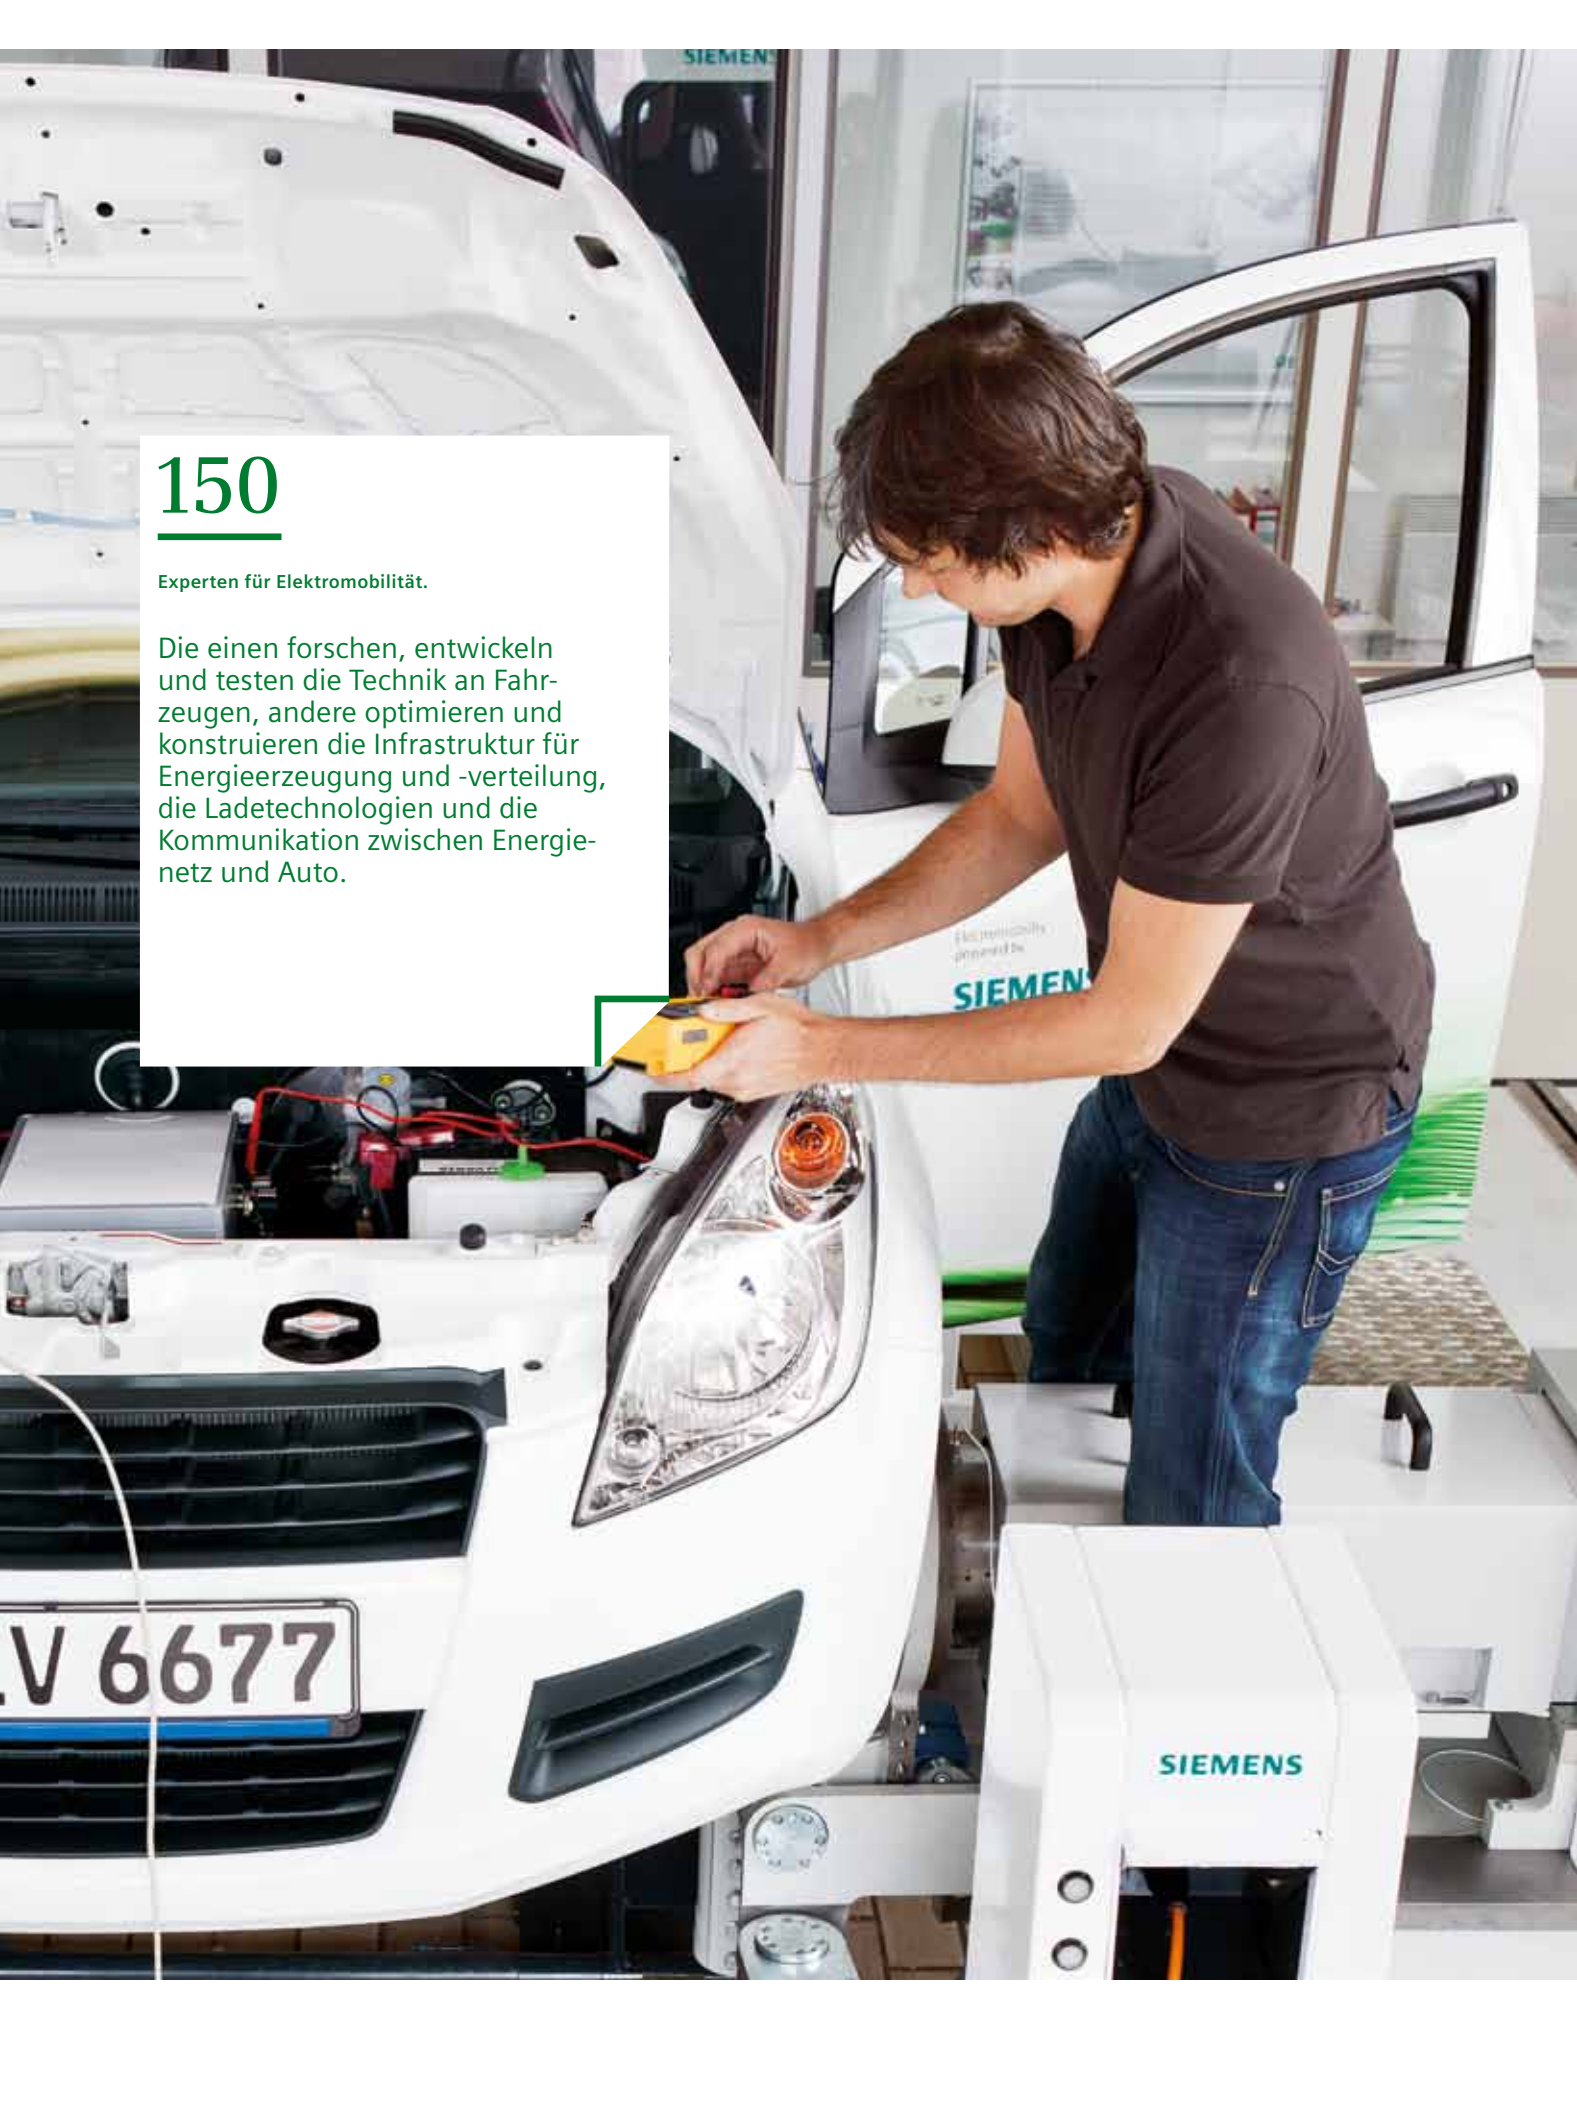

A man in a dark polo shirt is focused on working on a large, grey industrial electric motor. He is surrounded by thick yellow and orange cables. In the background, a white car is on an assembly line, and another worker is visible. The scene is set in a bright, modern industrial environment.

# 120

Kilometer mit einer Batterieladung.

Das Herz der 100 Elektroautos des Flottentests ist ein Elektromotor. Bei einem Gesamtgewicht von nur 55 kg leistet dieser in der Spitze 125 kW und im dauerhaften Fahrbetrieb 50 kW.



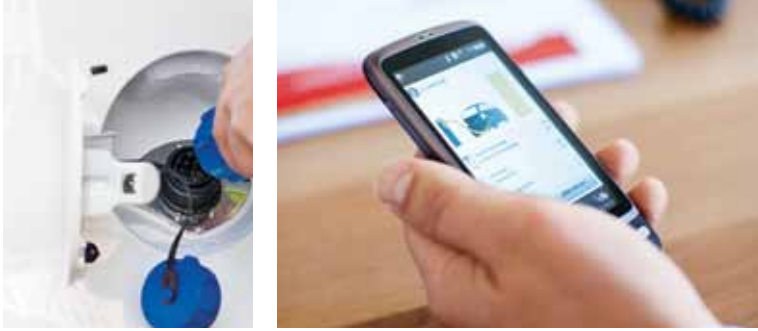

- ^ Das Ladekabel des Elektroautos transportiert Energie und Daten in beide Richtungen. Per Mobilfunk informiert das Ladesystem den Autofahrer auf Wunsch über den aktuellen Stand oder das Ende der Ladung.
- < In München kontrollieren unsere Spezialisten die Elektromotoren der Elektroautos regelmäßig auf Sicherheit, Funktion und Verschleiß.

Die Kraft aus Wind und Sonne und ihre umweltschonende Nutzung bestimmen den globalen Wandel der Mobilität. Siemens entwickelt als weltweit einziges Unternehmen Lösungen für die gesamte Energieumwandlungskette. Strom, zum Beispiel aus Siemens-Windkraftanlagen, fließt über intelligente Siemens-Stromnetze (*Smart Grids*) und komfortable Siemens-Ladestationen in die Elektroauto-Batterien, um dort Siemens-Elektromotoren anzutreiben – eine hervorragende und breite Basis, die uns alle Marktchancen eröffnet.

»Smart Grids versetzen uns in die Lage, Energie und vor allem elektrische Energie künftig effizienter zu nutzen. In Zukunft werden wir als Verbraucher mit dem Stromnetz automatisiert interagieren, beispielsweise indem wir mit unseren Elektrofahrzeugen Strom speichern oder sogar Strom ins Netz einspeisen können, wenn die Batterie mal nicht benötigt wird. Unsere eigene Siemens-Flotte von Elektrofahrzeugen ist hier ein gutes Beispiel für modernes, umweltfreundliches und intelligentes Fahren.«

Richard Hausmann, CEO Company Project Smart Grid Applications and Electromobility



# 100

Siemens-Testfahrer.

Als Testfahrer können sich zunächst 100 Mitarbeiter der Standorte München und Erlangen bewerben. Die Ausdehnung auf weitere Standorte ist geplant.

# Wegbereiter der Elektromobilität

---

## Siemens verfügt über die entsprechende Technologie sowie das notwendige Know-how, der Elektromobilität zum Durchbruch zu verhelfen.

Werner von Siemens wäre stolz. Das Thema Elektromobilität steht in der Tradition großartiger Pionierleistungen des Unternehmens. Schon der Unternehmensgründer testete 1882 eine »Urform« des elektrischen Oberleitungsbusses, die Elektromote. Der Sohn Wilhelm von Siemens produzierte dann mit der »Elektrischen Viktoria« 1905 in einer Kleinserie eines der ersten deutschen Elektroautos.

Heute sind wir Markt- und Innovationsführer in der Elektrotechnologie. Das Elektroauto ist nur ein Baustein in einem Gesamtkonzept, bei dem es um weit mehr als nur um das elektrische Fahren geht.

Die Welt steht an der Schwelle zu einem neuen Stromzeitalter. In Zukunft wird Strom der wichtigste Energieträger sein. Damit wird zugleich der Bedarf an Strom rapide wachsen, und ein immer größerer Teil wird regenerativ erzeugt werden – eine Herausforderung, denn erneuerbare Energien wie Wind und Sonne sind aufgrund der mit ihnen einhergehenden Stromschwankungen für das bisherige Stromnetz eine große Belastung. Der Schlüssel ist ein flexibles, modernes Netz, ein sogenanntes Smart Grid, das sich auf den Bedarf der Verbraucher einstellen kann. In diesen künftigen Smart Grids kann dem Elektroauto als Zwischenspeicher eine wichtige Rolle zukommen, kann es doch gespeicherte Energie bei Bedarf wieder ans Netz abgeben. Siemens verfügt über die Technologie und das

Know-how, die erforderlich sind, um der Elektromobilität zum Durchbruch zu verhelfen. Als eines der wenigen Unternehmen weltweit decken wir die gesamte Prozesskette der Elektromobilität ab – von der Infrastruktur, also der Energieerzeugung und -verteilung, über die Lade- und Antriebstechnologie bis zur Leistungselektronik. Eine neu gegründete Geschäftseinheit bündelt Schlüsselkomponenten für die Antriebstechnik wie auch die Leistungselektronik – zum Beispiel Elektromotoren, Umrichter und intelligente Ladetechnik. Ebenfalls neu entstanden in diesem Zusammenhang ist das Konzernprojekt »Smart Grid Applications«. Sein Ziel ist es, unsere Aktivitäten auf der Stromerzeugungs-, -transport- und -verteilungsseite mit der Verbraucherseite durch intelligente Anwendungen und Kommunikationstechnologien zu verbinden.

Als einer der weltweit führenden Industriesoftware- und Automatisierungsanbieter trägt Siemens entscheidend dazu bei, mit effizienten Produktionsmethoden die Kosten für Elektrofahrzeuge und ihre Schlüsselkomponenten wie Batterien zu senken. Auch in der Elektromobilität wollen wir – aufbauend auf unserer langjährigen Erfahrung in diesen Segmenten – ein verlässlicher Partner für Automobilhersteller- und -zulieferer sein. Folgerichtig haben wir uns in den vergangenen zwei Jahren an verschiedenen internationalen wie nationalen Pilotprojekten beteiligt. Dazu zählen EDISON in Dänemark, Harz.EE-Mobility in der Region Harz und Drive eCharged innerhalb der Modellregion Elektromobilität München.

In dem dargestellten Mitarbeiter-Flottentest prüfen wir derzeit noch einmal alle Siemens-Entwicklungen auf Alltagstauglichkeit und verbessern sie. Hiermit bekräftigt Siemens seinen Anspruch auf eine führende Rolle im neuen Zusammenspiel von Autoherstellern und Stromanbietern – beim großen Umbau, den sowohl der Verkehr als auch die Energieinfrastruktur im neuen Stromzeitalter erleben werden. Das Nachrichtenmagazin »Der Spiegel« sieht unser Unternehmen auf dem richtigen Weg: »Nur ein Großkonzern mit Know-how, Logistik, Punch kann diese Rolle übernehmen. Wenn es auf der Welt drei Firmen gibt, die so ein Projekt stemmen könnten, ist das viel. In Europa fällt einem nur ein Name ein, eine Firma aus München am Wittelsbacher Platz 2.«

[www.siemens.com/elektromobilitaet](http://www.siemens.com/elektromobilitaet)



---

Siemens nimmt weltweit Spitzenpositionen ein. Wir haben in den vergangenen Jahren mithilfe von Unternehmensprogrammen den Konzern transformiert und damit unsere Wettbewerbsfähigkeit im globalen Kontext kontinuierlich gestärkt. Unser Portfolio ist auf attraktive Wachstumsmärkte ausgerichtet, in puncto Profitabilität haben wir zu unseren Wettbewerbern aufgeschlossen oder diese übertroffen. In vielen unserer Geschäfte sind wir als integrierter Technologiekonzern führend.

Aus dieser Position der Stärke heraus gehen wir in die Zukunft. One Siemens gibt mit einem Zielsystem und dem Anspruch auf kontinuierliche Verbesserung gegenüber Markt und Wettbewerbern den Rahmen vor.



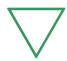

## Zielsystem zur nachhaltigen Wertsteigerung

siehe Schaubild auf Seite 57 sowie Finanzbericht auf den Seiten 54 f. und 60 f.

Wir orientieren uns an der Dynamik unserer Märkte sowie an den Besten im Wettbewerb. Unsere Wettbewerber dauerhaft zu übertreffen und selbst Maßstab für die Spitzenposition zu sein sind unser Ziel und unser Anspruch. Das gilt für unsere finanzielle Leistung in gleicher Weise wie für unsere operative Stärke. Unser finanzielles Zielsystem definiert Kenngrößen für Umsatzwachstum, für Kapitaleffizienz und Profitabilität sowie für die Optimierung unserer Kapitalstruktur. Diese Kenngrößen sind Treiber für kapitaleffizientes Wachstum zur Steigerung des Unternehmenswerts.

### UMSATZWACHSTUM

Der wichtigste Treiber für langfristige Wertsteigerung ist profitables Umsatzwachstum. Das konkrete Ziel lautet: Wir wollen stärker wachsen als unsere wesentlichen Wettbewerber. Dazu werden wir uns mit dem durchschnittlichen Umsatzwachstum der relevanten Wettbewerber vergleichen. Für Akquisitionen setzen wir uns strenge Maßstäbe.

### KAPITALEFFIZIENZ UND PROFITABILITÄT

Wir haben den Anspruch, weiterhin profitabel zu sein und möglichst effizient mit dem Kapital unserer Aktionäre und Kreditgeber zu arbeiten. Hieran lassen wir uns messen und berichten seit dem Geschäftsjahr 2007 über unsere Kapitaleffizienz. Unsere weiterentwickelte Steuerungsgröße Return on Capital Employed (ROCE angepasst) ist vereinfachend definiert als der Gewinn aus fortgeführten Aktivitäten vor Zinsen, geteilt durch das durchschnittlich eingesetzte Kapital. Für die Zukunft

haben wir uns auf Konzernebene ein ambitioniertes Ziel für die Kapitaleffizienz gesetzt. Unsere Spitzenposition bei der Profitabilität unserer Geschäfte wollen wir halten und ausbauen. Unser Ziel ist es, dauerhaft Top-Margen im Vergleich mit den Besten der Branche zu erreichen – über die jeweiligen Branchenzyklen hinweg.

### KAPITALSTRUKTUR

Dauerhaftes Ergebnis- und Umsatzwachstum ist nur auf Basis einer gesunden Kapitalstruktur möglich. Ergänzend zu unseren operativen Steuerungsgrößen haben wir eine Kenngröße zur Steuerung unserer Kapitalstruktur definiert. Sie wird gemessen am Verhältnis der bereinigten industriellen Nettoverschuldung zum EBITDA. Dieses Verhältnis werden wir weiter optimieren. Damit wollen wir sowohl einen breiten Kapitalmarktzugang zu verschiedenen Fremdfinanzierungsmitteln als auch die Bedienung unserer Finanzschulden unter Wahrung unseres bisherigen Kreditratings sicherstellen.

Aus dem Zusammenspiel der genannten Kenngrößen ergibt sich ein ausgewogenes System, das wir als Basis für eine nachhaltige Wertsteigerung sehen.

### KONTINUIERLICHE VERBESSERUNG

Hinter One Siemens steht der Anspruch, uns kontinuierlich gegenüber Markt und Wettbewerbern zu verbessern und so den Unternehmenswert nachhaltig zu steigern.

[www.siemens.com/one-siemens](http://www.siemens.com/one-siemens)

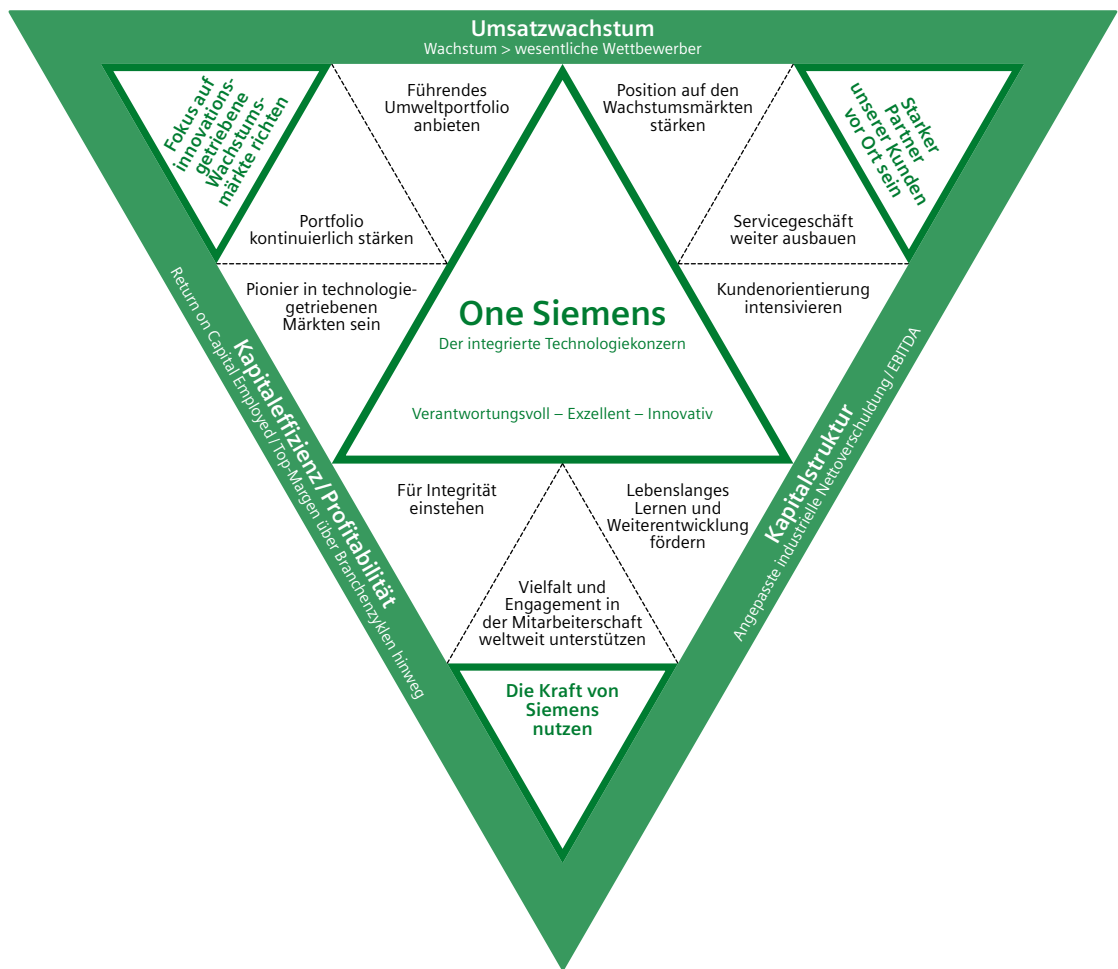

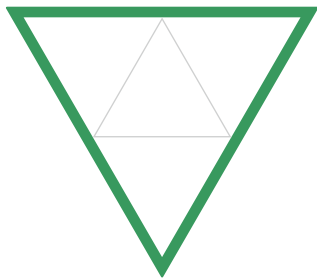

Zielsystem zur nachhaltigen Wertsteigerung

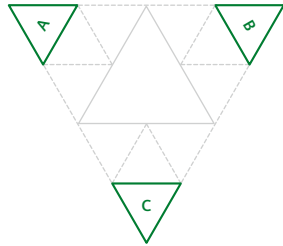

A-C  
Strategische Stoßrichtungen

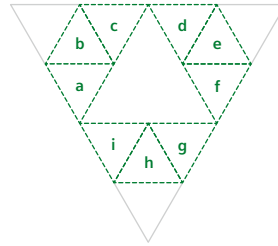

a-i  
Fokusthemen

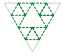

Fokusthemen  
siehe Schaubild auf Seite 57

---

Wir wollen das Potenzial des integrierten Technologiekonzerns voll ausschöpfen. Eine stringente, auf Wertsteigerung ausgerichtete Strategie hilft uns dabei. Den Fokus auf innovationsgetriebene Wachstumsmärkte richten, ein starker Partner unserer Kunden vor Ort sein und die Kraft von Siemens nutzen: Drei strategische Stoßrichtungen geben den Weg vor. Konkretisiert werden sie durch neun Fokusthemen. Sie setzen die Schwerpunkte unserer Aktivitäten in den kommenden Jahren.



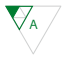

Die Grundlage unseres Geschäftserfolgs ist unser Selbstverständnis als Pionier: Wir beschreiten Neuland und stoßen auf Wachstumsmärkte vor, denken grenzübergreifend und betrachten jede Herausforderung aus unterschiedlichen Perspektiven. Wir richten unsere Aktivitäten auf innovationsgetriebene Märkte aus, auf Märkte mit langfristigem Wachstumspotenzial. An ihnen wollen wir eine führende Rolle einnehmen. Hieraus leiten wir drei Fokusthemen ab:

#### **PIONIER IN TECHNOLOGIEGETRIEBENEN MÄRKTEN SEIN**

Wir konzentrieren uns auf innovations- und technologiegetriebene Wachstumsmärkte, die die Basis für die künftigen Kerngeschäfte von Siemens sind. Damit eröffnen wir neue Wege zur Steigerung unserer Umsätze aus »grünen« Produkten und Lösungen. So brauchen die Städte der Welt verstärkt intelligente und nachhaltige Infrastrukturen – und Siemens kann wie kein anderes Unternehmen diesen Bedarf noch besser decken. Dieses Potenzial wollen wir gezielt nutzen und unsere Stärken als integrierter Technologiekonzern voll einbringen.

#### **PORTFOLIO KONTINUIERLICH STÄRKEN**

Eine wesentliche Voraussetzung für dauerhaftes profitables Wachstum ist die Ausrichtung unseres Portfolios auf attraktive Zukunftsmärkte. Deshalb steuern wir unser Portfolio aktiv und systematisch.

Dabei folgen wir dem Grundsatz, die erste oder zweite Position an allen jetzigen und künftigen Märkten zu erreichen oder zu halten. Diese Führungspositionen ermöglichen es uns, den Unternehmenswert nachhaltig zu steigern, da sie Voraussetzungen für Profitabilität und Wachstum sind. Aus der Vergangenheit haben wir gelernt, dass Größe allein nicht ausreicht, um dauerhaft erfolgreich zu bleiben. Nur wenn wir darüber hinaus technologisch wegweisend sind, werden wir unsere Geschäfte auf lange Sicht noch erfolgreicher führen. Veränderungen im Siemens-Portfolio orientieren sich an diesem Prinzip.

#### **FÜHRENDES UMWELTPORTFOLIO ANBIETEN**

Siemens nimmt mit seinem Umweltportfolio eine weltweit bedeutende Stellung ein. Dies belegen nicht zuletzt die Umsatzzahlen der vergangenen Jahre. Im Geschäftsjahr 2010 haben wir mit dem Umweltportfolio einen Umsatz von rund 28 Milliarden Euro erreicht. Für die Zukunft haben wir uns ein noch ambitionierteres Ziel gesetzt: Bis 2014 wollen wir mit den Produkten und Lösungen unseres Umweltportfolios einen Umsatz von über 40 Milliarden Euro erwirtschaften. Damit leisten wir zugleich einen maßgeblichen Beitrag zum Klimaschutz. Denn dank unserer umweltfreundlichen Produkte und Lösungen konnten unsere Kunden ihren CO<sub>2</sub>-Ausstoß im Geschäftsjahr 2010 um 267 Millionen Tonnen reduzieren.

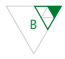

Ob in Großstädten oder in ländlichen Gebieten: Siemens ist überall auf der Welt nah bei seinen Kunden. Denn Nähe zum Markt ist ein wichtiger Treiber für nachhaltiges Wachstum. Und dies stellen wir auch in Zukunft sicher, indem wir uns auf die folgenden drei Fokusthemen konzentrieren:

#### **POSITION AUF DEN WACHSTUMSMÄRKTEN STÄRKEN**

An vielen Märkten der Welt nehmen wir bereits heute eine führende Position ein. Hierauf wollen wir aufbauen. Deshalb haben wir uns zum Ziel gesetzt, den Anteil unseres Umsatzes aus Schwellenländern kontinuierlich auszubauen. Die Herausforderung liegt darin, diese Märkte in Zukunft noch konsequenter für uns zu erschließen. Hierzu werden wir verstärkt Produkte, Lösungen und Dienstleistungen für die sehr schnell wachsenden mittleren und unteren Marktsegmente anbieten. Zudem geben wir unseren Unternehmern vor Ort den notwendigen Freiraum für ihre Entscheidungen. So erweitert Siemens in aufstrebenden Wirtschaftsnationen gezielt die Verantwortlichkeiten, beispielsweise für Produktmanagement, Entwicklung, Einkauf und Produktion.

#### **SERVICEGESCHÄFT WEITER AUSBAUEN**

Service ist ein wichtiger Treiber, unsere Wachstumsstrategie umzusetzen, und trägt entscheidend zur Profitabilität bei. Er erzeugt verlässliche Einnahmen mit hohen Margen, ist aber weniger kapitalintensiv als andere Geschäftsarten. Zudem ist er unter anderem aufgrund von Langzeitverträgen

weniger konjunkturanfällig. Um unser enormes Potenzial im hoch diversifizierten Service weiter auszuschöpfen, investieren wir weltweit. Zudem erweitern wir konsequent unser Angebot von hoch entwickelten Servicetechnologien und innovativen Dienstleistungen. Wir sind überzeugt, dass gerade vor dem Hintergrund steigender Produktstandardisierung Service ein wichtiges strategisches Differenzierungsmerkmal im Wettbewerb ist. Er bringt Siemens nah an den Kunden – und dies über den gesamten Lebenszyklus eines Produkts hinweg. Auch in Zukunft werden wir daher den Ausbau unseres Servicegeschäfts konsequent vorantreiben.

#### **KUNDENORIENTIERUNG INTENSIVIEREN**

Siemens hat sich bereits in der Vergangenheit den Ruf großer Kundennähe erarbeitet. Die meisten unserer Kunden sind Organisationen kleiner und mittlerer Größe. Sie direkt und vor Ort zu betreuen ist uns eine Verpflichtung. Ein weltweit agierender Vertrieb, der von unseren Clustern und Regionalgesellschaften gesteuert wird, sorgt dafür. Die großen Kunden in unseren Schlüsselmärkten unterstützen wir zudem mit einem Key-Account-Management, das alle für die Kunden relevanten Unternehmensbereiche repräsentiert. Unsere mehr als 2.000 Key-Account-Manager bedienen die weltweit größten Siemens-Auftraggeber mit nachhaltigen Lösungen – vom täglichen Liefergeschäft bis hin zu großen Infrastrukturprojekten. Letztendlich hängt unser Erfolg von der Zufriedenheit unserer Kunden ab. Diese messen wir bei Siemens anhand einer international anerkannten Methode.

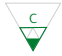

Die Vorteile, die Siemens durch seine globale Ausrichtung und Größe sowie die Aufstellung als integrierter Technologiekonzern bietet, werden wir auch weiterhin zum Vorteil unserer Kunden, Lieferanten und Mitarbeiter nutzen. Sektor- und divisionsübergreifende Zusammenarbeit und externe Partnerschaften versetzen uns in die Lage, unseren Kunden ein in seiner Vielfalt einzigartiges Angebotsspektrum anzubieten – nicht zuletzt dank unserer herausragenden, innovativen Mitarbeiter: Sie gehören zu unseren größten Stärken.

#### **LEBENSLANGES LERNEN UND WEITERENTWICKLUNG FÖRDERN**

Innovationen bilden die Grundlage nachhaltigen Wachstums. Sie entstehen nicht von selbst, sie sind vielmehr das Ergebnis innovativer Ideen unserer Mitarbeiter. Um dies auch in Zukunft sicherzustellen, entwickeln wir ihre Kompetenzen kontinuierlich weiter. Anspruchsvolle Aus- und Weiterbildungsprogramme helfen uns dabei. Allein in Deutschland gehört Siemens mit seinem Modell der dualen Ausbildung, das fachliche Praxis mit theoretischer Anleitung verbindet, zu den größten privaten Ausbildungsbetrieben. Eigene Siemens-Leadership-Excellence-Programme bereiten unsere Führungskräfte gezielt auf ihre künftigen Aufgaben vor. Wir identifizieren Talente und bieten ihnen herausfordernde Aufgaben. Basis hierfür sind einheitliche Kriterien, anhand derer wir die Kompetenzen und das Potenzial der Mitarbeiter mit den Anforderungen der jeweiligen neuen Positionen in Einklang bringen. Der neue Siemens Leadership Framework (SLF) hilft uns dabei.

#### **VIelfALT UND ENGAGEMENT IN DER MITARBEITERSCHAFT WELTWEIT UNTERSTÜTZEN**

Weltweite Präsenz ist unser Markenzeichen – Diversity, also die Vielfalt in allen Bereichen unseres Unternehmens, ist deshalb ein wichtiges Anliegen, das wir weiter ausbauen wollen. Unsere Diversity-Initiative hilft uns beim Aufbau herausragender Mitarbeiterteams mit breit gefächerten Fähigkeiten und Erfahrungen. Sie fördert gleichzeitig die Stärken des Einzelnen in heterogenen Umgebungen. Die Initiative trägt dazu bei, sicherzustellen, dass unsere Führungskräfte einen internationalen Hintergrund haben. Dazu zählt, dass sie über weitreichende Sachkenntnisse und umfangreiche Erfahrungen verfügen.

#### **FÜR INTEGRITÄT EINSTEHEN**

Siemens pflegt eine Unternehmenskultur mit hohem Anspruch an das Verhalten seiner Führungskräfte und Mitarbeiter. Wir haben transparente und verbindliche Grundsätze für unser Verhalten formuliert. Sie decken alle Aspekte unseres unternehmerischen Handelns ab, definieren ein einheitliches ethisches Grundgerüst und legen klare Verantwortlichkeiten fest – und dies unternehmensweit: Zu den Handlungsfeldern zählen die Bekämpfung von Korruption ebenso wie Arbeitssicherheit und Gesundheitsmanagement sowie der Schutz der natürlichen Ressourcen. Nach klaren Integritätsgrundsätzen zu handeln – diesen Anspruch stellen wir nicht nur an uns selbst, wir erwarten dies auch von unseren Partnern und Lieferanten.

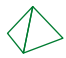

Schaubild Vision  
siehe Seite 12

---

Siemens ist ein Industriekonzern, der vorausblickt und vorangeht. Diese Haltung ist Ausdruck unseres Pioniergeists. Pionier zu sein bedeutet für uns mehr als Erfindung und Innovation. Es bedeutet, Neuland nicht nur zu beschreiten, sondern auch zu schaffen, Produkte und Lösungen zielführend zu gestalten, einzusetzen und für neue Aufgaben zu verknüpfen. Und es bedeutet, kalkulierbare Risiken einzugehen, um Innovationen voranzutreiben. Diese Bereitschaft, gepaart mit Begeisterung und Leidenschaft, treibt unsere Mitarbeiter an. Denn nur ein Team, in dem jeder sein Bestes gibt, seine Verantwortung kennt und um seine Stärken weiß, kann echte Pionierarbeit leisten – heute wie 1847, als unser Unternehmen gegründet wurde. Dieser Pioniergeist prägt die Siemens-Vision für unsere Technologiefelder und die großen Märkte von morgen.



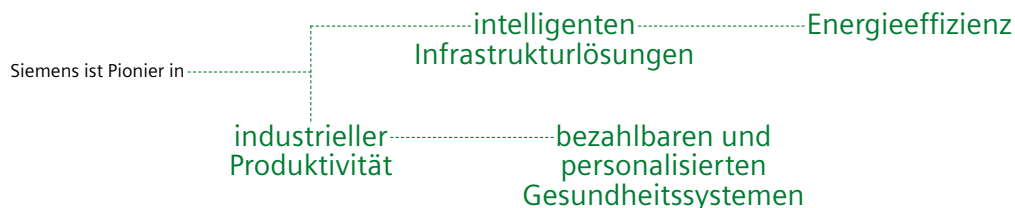

[www.siemens.com/vision](http://www.siemens.com/vision)

## Vorausdenken

Pionier zu sein gehört für Siemens zum gelebten Selbstverständnis, es ist unsere Vision. Unsere größten Erfolge in mehr als 160 Jahren Unternehmensgeschichte sind mit technologischen Pioniertaten verbunden. Siemens errichtete ab 1848 bedeutende Telegraphenverbindungen, läutete 1866 das Zeitalter der Energietechnik ein und entwickelte nach Entdeckung der Röntgenstrahlen 1896 die ersten Röntgenapparate. 1905 stellte Siemens eines der ersten Serien-Elektroautos in Deutschland vor, 1996 Piezo-Einspritzsysteme für leistungsstarke und energieeffiziente Verbrennungsmotoren und 2009 die erste im Meer frei schwimmende Megawatt-Windturbine zur Stromerzeugung. Ein Pionier auf dem Gebiet innovativer Beleuchtungstechnik ist OSRAM. Die LED-Tochter OSRAM Opto Semiconductors baut in Regensburg die weltweit erste Pilotproduktionslinie für organische LED (OLED) auf. Ziel ist es, die Technologie und die Fertigungsprozesse zügig weiterzuentwickeln und eine Vorstufe zur Massenfertigung zu erreichen.

Die Herausforderungen der Zukunft verlangen jedoch nach mehr, als neue Technologien zu erfinden. Wir antworten darauf mit unserer Vision: vorausdenken, um Neuland zu betreten. Im Fokus steht die Art und Weise industrieller Wertschöpfung. Hierbei geht es beispielsweise darum, die Produktivität bei immer kürzeren Entwicklungs- und Markteinführungszeiten weiter zu steigern. So haben wir neue Technologien entwickelt, die eine

gleichzeitige Produkt- und Produktionsplanung ermöglichen. Ein Schlüssel hierfür ist das Zusammenwachsen von Produkt-Lebenszyklus-Management-(PLM-)Systemen mit der Automatisierungstechnik. Siemens setzt auf eine Industriesoftware, die eine ganzheitliche Entwicklungsumgebung über alle Stufen der Wertschöpfung bietet.

Ein Pionier muss sich auf neues, manchmal unsicheres Terrain begeben. Doch als kerngesundes Unternehmen können wir unsere größte Stärke, die Pionierarbeit, auch in schwierigen Zeiten gestalten und entwickeln. Wir haben es in der jüngsten Wirtschaftskrise bewiesen. Denn Pionier zu sein heißt nicht, Risiken zu suchen, sondern verantwortlich mit Blick für die Zukunft zu handeln. Es sind die exzellenten Kenntnisse unserer Mitarbeiter, ihre Erfahrung mit technisch Möglichem und praktisch Machbarem, die Pioniertaten erst erlauben. Unser wirtschaftliches Fundament bildet die stabile und kontrollierte Basis, Chancen zu prüfen und zu ergreifen. Sie sichert die langfristige Perspektive, die nötig ist, um Visionen zu folgen – Visionen wie etwa die dargestellte Versorgung Europas mit Sonnen- und Windstrom aus Nordafrika, Visionen wie die Errichtung einer CO<sub>2</sub>-neutralen Stadt, die in den Vereinigten Arabischen Emiraten mit »Masdar City« bereits umgesetzt wird, oder die komplette Vernetzung aller Verkehrsträger, um Menschen und Güter effizienter zu transportieren. Und Visionen wie die umfassende Bereitstellung preiswerter Medizintechnik für Entwicklungs- und Schwellenländer.



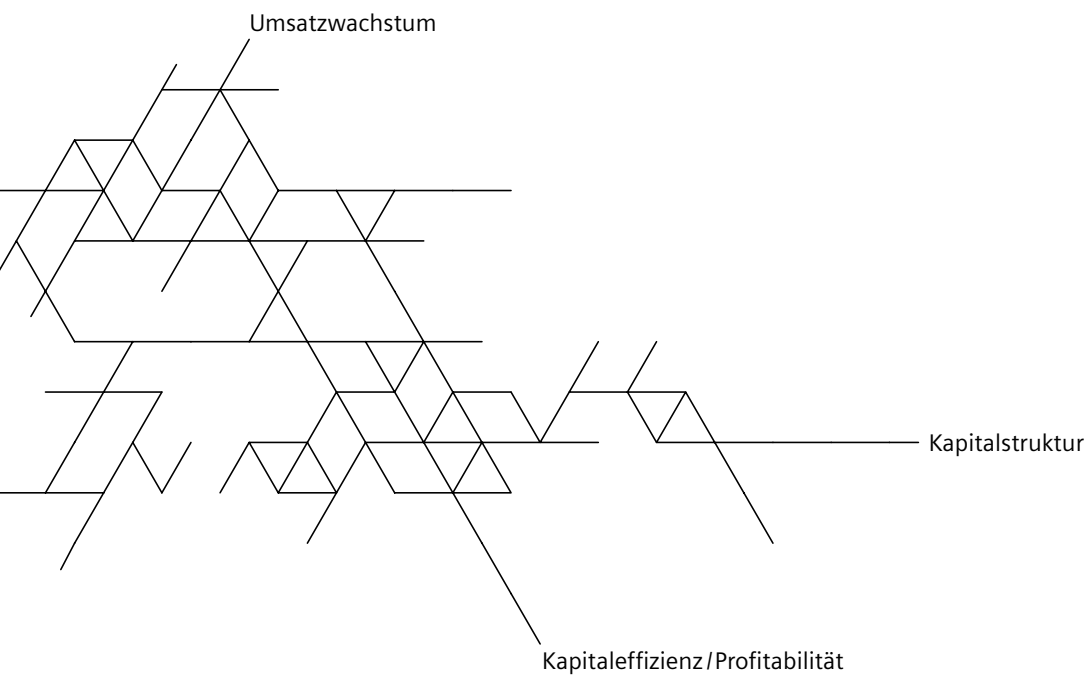

## Finanzkalender<sup>1</sup>

---

|                                                                       |                   |
|-----------------------------------------------------------------------|-------------------|
| Geschäftszahlen für das 1. Quartal                                    | <b>25.01.2011</b> |
| Hauptversammlung – Olympiahalle München, 10 Uhr                       | <b>25.01.2011</b> |
| Kurs ex Dividende                                                     | <b>26.01.2011</b> |
| Geschäftszahlen für das 2. Quartal und Halbjahrespressekonferenz      | <b>04.05.2011</b> |
| Geschäftszahlen für das 3. Quartal                                    | <b>28.07.2011</b> |
| Vorläufige Geschäftszahlen für das Geschäftsjahr 2011/Pressekonferenz | <b>10.11.2011</b> |
| Hauptversammlung für das Geschäftsjahr 2011                           | <b>24.01.2012</b> |

<sup>1</sup> Vorläufige Termine. Eine Aktualisierung finden Sie unter: [www.siemens.com/finanzkalender](http://www.siemens.com/finanzkalender)



# Inhalt Teil II

## An die Aktionäre

---

- 6 Bericht des Aufsichtsrats
- 12 Brief an die Aktionäre
- 18 Aktie / Investor Relations

## Corporate Governance

---

- 23 Corporate-Governance-Bericht
- 29 Erklärung zur Unternehmensführung nach § 289a HGB (Bestandteil des Zusammengefassten Lageberichts)
- 30 Compliance-Bericht
- 34 Vergütungsbericht (Bestandteil des Anhangs zum Konzernabschluss)

## Zusammengefasster Lagebericht

---

- 50 Geschäft und Rahmenbedingungen
- 81 Geschäftsjahr 2010 – Finanzieller Überblick
- 84 Ertragslage
- 104 Finanzlage
- 118 Vermögenslage
- 121 Gesamtaussage zur wirtschaftlichen Lage
- 122 Nachtragsbericht
- 123 Bericht über die voraussichtliche Entwicklung mit ihren wesentlichen Chancen und Risiken
- 140 Angaben nach § 289 Abs. 4 und § 315 Abs. 4 HGB und erläuternder Bericht
- 145 Angaben nach § 289 Abs. 5 und § 315 Abs. 2, Nr. 5 HGB und erläuternder Bericht
- 148 Vergütungsbericht und Erklärung zur Unternehmensführung nach § 289a HGB
- 148 Weitere Informationen zu zusätzlichen Finanzkennzahlen
- 151 Siemens AG (Erläuterungen auf Basis HGB)

## Konzernabschluss

---

- 162 Konzern-Gewinn- und Verlustrechnung
- 163 Konzern-Gesamtergebnisrechnung
- 164 Konzernbilanz
- 165 Konzern-Kapitalflussrechnung
- 166 Konzern-Eigenkapitalveränderungsrechnung
- 168 Konzernabschluss, Anhang

## Weitere Informationen

---

- 290 Erklärung des Vorstands
- 290 Versicherung der gesetzlichen Vertreter
- 291 Bestätigungsvermerk des Abschlussprüfers
- 292 Fünfjahresübersicht
- 294 Wichtige Begriffe und Abkürzungen
- 298 Stichwortverzeichnis
- 301 Impressum
- 303 Unternehmensstruktur

| Umsatzwachstum       |      |
|----------------------|------|
| GJ 2010 <sup>3</sup> | - 3% |
| GJ 2009 <sup>3</sup> | 0%   |

| Ergebnismargen GJ 2010                   |                |
|------------------------------------------|----------------|
| <b>Industry</b>                          | <b>10,0%</b>   |
| Industry Automation                      | 16,8%          |
| Drive Technologies                       | 12,3%          |
| Building Technologies                    | 6,6%           |
| OSRAM                                    | 12,2%          |
| Industry Solutions                       | 0,7%           |
| Mobility                                 | 7,9%           |
| <b>Energy</b>                            | <b>14,0%</b>   |
| Fossil Power Generation                  | 15,9%          |
| Renewable Energy                         | 11,3%          |
| Oil & Gas                                | 11,7%          |
| Power Transmission                       | 12,4%          |
| Power Distribution                       | 13,9%          |
| <b>Healthcare<sup>7,8</sup></b>          | <b>7,5%</b>    |
| Imaging & IT                             | 19,6%          |
| Workflow & Solutions                     | 1,8%           |
| Diagnostics <sup>7,8</sup>               | - 16,3%        |
| <b>Siemens IT Solutions and Services</b> | <b>- 12,9%</b> |
| <b>Siemens Financial Services*</b>       | <b>30,4%</b>   |

Zielbänder \* Eigenkapitalrendite (Return on Equity, ROE)<sup>9</sup>

| Kapitalrendite (ROCE) (fortgeführte Aktivitäten) |       |
|--------------------------------------------------|-------|
| GJ 2010 <sup>10</sup>                            | 10,4% |
| GJ 2009 <sup>10</sup>                            | 6,1%  |

Zielkorridor: 14 – 16%

| Cash Conversion (Verhältnis von Free Cash Flow zu Ergebnis) (fortgeführte Aktivitäten) |      |
|----------------------------------------------------------------------------------------|------|
| GJ 2010 <sup>11</sup>                                                                  | 1,73 |
| GJ 2009 <sup>11</sup>                                                                  | 1,54 |

Ziel: 1 minus Umsatzwachstumsrate

| Angepasste industrielle Nettoverschuldung/ angepasstes EBITDA (fortgeführte Aktivitäten) |      |
|------------------------------------------------------------------------------------------|------|
| GJ 2010                                                                                  | 0,08 |
| GJ 2009                                                                                  | 0,31 |

Zielkorridor: 0,8 – 1,0

| Wachstum und Ergebnis                                        |  | GJ 2010 | GJ 2009 | Veränderung in % |                    |
|--------------------------------------------------------------|--|---------|---------|------------------|--------------------|
|                                                              |  |         |         | Ist              | Vglb. <sup>3</sup> |
| <b>Fortgeführte Aktivitäten</b>                              |  |         |         |                  |                    |
| Auftragseingang                                              |  | 81.163  | 78.991  | 3%               | 1%                 |
| Umsatz                                                       |  | 75.978  | 76.651  | - 1%             | - 3%               |
| <b>Summe Sektoren</b>                                        |  |         |         |                  |                    |
| Ergebnis Summe Sektoren                                      |  | 7.789   | 7.466   | 4%               |                    |
| in % vom Umsatz (Summe Sektoren)                             |  | 10,7%   | 10,3%   |                  |                    |
| EBITDA (angepasst)                                           |  | 11.042  | 9.524   | 16%              |                    |
| in % vom Umsatz (Summe Sektoren)                             |  | 15,2%   | 13,1%   |                  |                    |
| <b>Fortgeführte Aktivitäten</b>                              |  |         |         |                  |                    |
| EBITDA (angepasst)                                           |  | 10.034  | 9.219   | 9%               |                    |
| Gewinn aus fortgeführten Aktivitäten                         |  | 4.112   | 2.457   | 67%              |                    |
| Ergebnis je Aktie (in EUR) <sup>4</sup>                      |  | 4,54    | 2,60    | 75%              |                    |
| <b>Fortgeführte und nicht fortg. Aktivitäten<sup>5</sup></b> |  |         |         |                  |                    |
| Gewinn (nach Steuern)                                        |  | 4.068   | 2.497   | 63%              |                    |
| Ergebnis je Aktie (in EUR) <sup>4</sup>                      |  | 4,49    | 2,65    | 69%              |                    |

| Kapitalrendite (Return on Capital Employed, ROCE)            |  | GJ 2010 | GJ 2009 |
|--------------------------------------------------------------|--|---------|---------|
| <b>Fortgeführte Aktivitäten</b>                              |  |         |         |
| Kapitalrendite                                               |  | 10,4%   | 6,1%    |
| <b>Fortgeführte und nicht fortg. Aktivitäten<sup>5</sup></b> |  |         |         |
| Kapitalrendite                                               |  | 10,3%   | 6,2%    |

| Free Cash Flow und Cash Conversion                           |  | GJ 2010 | GJ 2009 |
|--------------------------------------------------------------|--|---------|---------|
| <b>Summe Sektoren</b>                                        |  |         |         |
| Free Cash Flow                                               |  | 10.934  | 7.606   |
| Cash Conversion                                              |  | 1,40    | 1,02    |
| <b>Fortgeführte Aktivitäten</b>                              |  |         |         |
| Free Cash Flow                                               |  | 7.111   | 3.786   |
| Cash Conversion                                              |  | 1,73    | 1,54    |
| <b>Fortgeführte und nicht fortg. Aktivitäten<sup>5</sup></b> |  |         |         |
| Free Cash Flow                                               |  | 7.013   | 3.641   |
| Cash Conversion                                              |  | 1,72    | 1,46    |

| Nettoverschuldung und Kapitalstruktur        |  | GJ 2010 | GJ 2009 |
|----------------------------------------------|--|---------|---------|
| Nettoverschuldung                            |  | 5.560   | 9.309   |
| Nettoverschuldung / angep. EBITDA (fortg.)   |  | 0,55    | 1,01    |
| Angepasste industrielle Nettoverschuldung    |  | 819     | 2.873   |
| Angep. ind. Nettov. / angep. EBITDA (fortg.) |  | 0,08    | 0,31    |

| Mitarbeiter (in Tausend) <sup>12</sup> |  | 30. Sept. 2010 |                     | 30. Sept. 2009 |                     |
|----------------------------------------|--|----------------|---------------------|----------------|---------------------|
|                                        |  | Fortg. Aktiv.  | Gesamt <sup>6</sup> | Fortg. Aktiv.  | Gesamt <sup>6</sup> |
| <b>Mitarbeiter</b>                     |  |                |                     |                |                     |
| Deutschland                            |  | 128            | 128                 | 128            | 128                 |
| Außerhalb Deutschlands                 |  | 277            | 277                 | 277            | 277                 |

1 Auftragseingang und Auftragsbestand, um Währungsumrechnungs- und Portfolioeffekte bereinigte Angaben zu Umsatz und Auftragseingang, Book-to-Bill-Verhältnis, Ergebnis Summe Sektoren, ROE, ROCE, Free Cash Flow, Cash Conversion Rate, EBITDA (angepasst), EBIT (angepasst), Effekte aus der Kaufpreisallokation (PPA-Effekte) sowie Integrationskosten, Nettoverschuldung sowie angepasste industrielle Nettoverschuldung sind oder können sogenannte Non-GAAP-Kennzahlen sein. Eine Definition dieser zusätzlichen Finanzkennzahlen, eine Diskussion vergleichbarer IFRS-Kennzahlen, Informationen zum Nutzen und zu den Grenzen in der Verwendung solcher ergänzenden Finanzkennzahlen sowie eine Überleitung zu vergleichbaren IFRS-Kennzahlen finden Sie auf unserer Investor-Relations-Website unter [www.siemens.com/inonGAAP](http://www.siemens.com/inonGAAP).

2 1. Oktober 2009 – 30. September 2010.

3 Bereinigt um Währungsumrechnungs- und Portfolioeffekte.

4 Ergebnis je Aktie – entfällt auf Aktionäre der Siemens AG. Der gewichtete Durchschnitt ausstehender Aktien (in Tsd.) betrug für die Geschäftsjahre 2010 und 2009 868.244 bzw. 864.818 Aktien.

5 Nicht fortgeführte Aktivitäten enthalten vornehmlich die ehemaligen Com-Aktivitäten. Diese umfassen das Geschäft mit Telekommunikationsinfrastruktur (Carrier-Geschäft), das Geschäft mit Lösungen für die Unternehmenskommunikation (Enterprise-Networks-Geschäft) sowie das Mobilfunkgeschäft.

6 Fortgeführte und nicht fortgeführte Aktivitäten.

7 Darin enthalten – 9,7 Prozentpunkte für Healthcare und – 32,8 Prozentpunkte für Diagnostics aufgrund 1,204 Mrd. EUR (vor Steuern) Wertminderungen bei Diagnostics.

8 Ergebnismarge mit Effekten aus der Kaufpreisallokation (PPA-Effekte) ist für Healthcare 6,1% und für Diagnostics – 21,2%.

9 Eigenkapitalrendite errechnet sich aus dem Ergebnis vor Ertragsteuern, bezogen auf das im Geschäftsjahr 2010 durchschnittlich eingesetzte Eigenkapital (1,470 Mrd. EUR).

10 Geschäftsjahr 2010: darin enthalten – 2,8 Prozentpunkte aufgrund von Wertminderungen bei Diagnostics und – 0,8 Prozentpunkte in Zusammenhang mit 460 Millionen EUR (vor Steuern) Belastungen aufgrund strategischer Neuausrichtung im IT-Geschäft. Geschäftsjahr 2009: darin enthalten – 4,6 Prozentpunkte aufgrund der Wertminderung bei NSN in Höhe von 1,850 Milliarden EUR (vor Steuern).

11 Geschäftsjahr 2010: darin enthalten – 0,44 aufgrund der Wertminderungen bei Diagnostics sowie auch der Belastungen für strategische Neuausrichtung des IT-Geschäfts. Geschäftsjahr 2009: darin enthalten – 0,66 aufgrund der Wertminderung bei NSN.

12 Aus Vereinfachungsgründen wird der Begriff »Mitarbeiter« verwendet; er steht stellvertretend für Mitarbeiterinnen und Mitarbeiter.

# Segmentinformationen

## Industry

Unser Sektor Industry bietet ein komplettes Spektrum an Produkten, Dienstleistungen und Lösungen, mit denen sich Ressourcen und Energie effizienter nutzen und die Produktivität von Industrie und Infrastruktur steigern lassen. Mit seinen integrierten Technologien und ganzheitlichen Lösungen richtet sich der Sektor in erster Linie an Industriekunden, beispielsweise aus der Prozess- und Fertigungsindustrie, sowie Infrastrukturlösungen, insbesondere aus dem Transportwesen, dem Gebäudemanagement oder dem Versorgungsbereich. Das Portfolio umfasst Produkte und Dienstleistungen für die Industrieautomatisierung und Antriebstechnik, Gebäude-, Beleuchtungs- und Transportlösungen. Systemintegration und Lösungen für das produzierende Gewerbe sind ebenfalls enthalten.

Industry Automation  
Drive Technologies  
Building Technologies  
OSRAM  
Industry Solutions  
Mobility

Umsatz 34,869 Mrd. EUR  
Ergebnis 3,478 Mrd. EUR

## Energy

Unser Sektor Energy bietet ein weites Spektrum an Produkten, Dienstleistungen und Lösungen für das Erzeugen, Übertragen und Verteilen von elektrischer Energie sowie für das Gewinnen, Umwandeln und den Transport von Öl und Gas. Der Sektor bedient vor allem den Bedarf von Energieversorgungsunternehmen. Auch Industrieunternehmen, insbesondere der Öl- und Gasindustrie, gehören zu seinen Kunden. Der Sektor Energy deckt die gesamte Energieversorgungskette ab.

Fossil Power Generation  
Renewable Energy  
Oil & Gas  
Power Transmission  
Power Distribution

Umsatz 25,520 Mrd. EUR  
Ergebnis 3,562 Mrd. EUR

## Healthcare

Unser Sektor Healthcare bietet seinen Kunden ein umfassendes Portfolio medizinischer Lösungen entlang der Wertschöpfungskette, von medizinischer Bildgebung über In-vitro-Diagnostik bis zu interventionellen Verfahren und klinischer Informationstechnologie – alles aus einer Hand. Außerdem übernimmt der Sektor technische Wartung, professionelle Dienst- und Beratungsleistungen sowie Finanzierungsleistungen für seine Kunden in Zusammenarbeit mit Siemens Financial Services.

Imaging & IT  
Workflow & Solutions  
Diagnostics

Umsatz 12,364 Mrd. EUR  
Ergebnis 748 Mio. EUR

## Equity Investments

Equity Investments umfasst im Allgemeinen von Siemens gehaltene Eigenkapitalanteile, die nach der Equity-Methode, zu Anschaffungskosten oder als kurzfristige zur Veräußerung verfügbare finanzielle Vermögenswerte bilanziert werden und die aus strategischen Gründen keinem Sektor, Sektorübergreifenden Geschäft, sowie nicht Siemens Real Estate (SRE), Pensionen oder der Konzern-Treasury zugeordnet sind. Equity Investments beinhaltet im Wesentlichen unseren Anteil von ungefähr 50,0% an Nokia Siemens Networks B.V. (NSN), unseren Anteil von 50,0% an BSH Bosch und Siemens Hausgeräte GmbH (BSH), unseren Anteil von 49,0% an Krauss-Maffei Wegmann GmbH & Co. KG (KMW), unseren Anteil von 50,0% an ELIN GmbH & Co. KG, unseren Anteil von 49,0% an Enterprise Networks Holdings B.V. (EN) sowie unseren Anteil von 19,8% an GIG Holding GmbH (vormals ARQUES Value Development GmbH).

**Wesentliche Beteiligungen**  
Nokia Siemens Networks  
BSH Bosch und Siemens Hausgeräte GmbH

Ergebnis - 191 Mio. EUR

## Cross-Sector Businesses

**Siemens IT Solutions and Services** entwickelt, integriert und betreibt Informations- und Kommunikationsinfrastrukturen und bietet aus einer Hand umfassende Lösungen für die Informationstechnologie und Kommunikation – für externe Kunden wie auch für Siemens.

**Siemens Financial Services (SFS)** ist ein internationaler Anbieter von Finanzlösungen für gewerbliche Kunden. SFS ist sowohl für Siemens als auch für externe Kunden tätig und konzentriert sich dabei auf die drei Branchen Industrie, Energie und Gesundheitswesen. SFS finanziert Infrastruktur, Equipment sowie Betriebsmittel und unterstützt und berät Siemens in Bezug auf das Management von finanziellen Risiken und Investments. Durch den kombinierten Einsatz seiner Finanz- und Industrieexpertise schafft SFS Wert für seine Kunden und verbessert ihre Wettbewerbsfähigkeit. Zum 1. Oktober 2010 wurde Siemens Financial Services in Financial Services umbenannt.

Siemens IT Solutions and Services

Umsatz 4,155 Mrd. EUR  
Ergebnis - 537 Mio. EUR

Siemens Financial Services

Ergebnis 447 Mio. EUR  
Gesamtvermögen 12,506 Mrd. EUR

# Sehr geehrte Aktionärinnen und Aktionäre

---

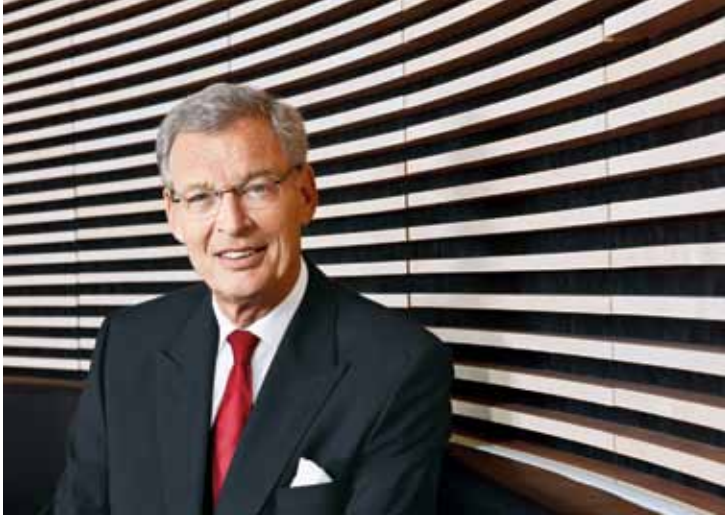

Im Berichtszeitraum kann Siemens insgesamt auf ein äußerst erfolgreiches Geschäftsjahr mit Rekordwerten zurückblicken, auch wenn die Folgen der weltweiten Finanz- und Wirtschaftskrise in einigen Geschäften noch fortwirkten.



---

Der Aufsichtsrat hat im Berichtsjahr die ihm nach Gesetz, Satzung und Geschäftsordnung obliegenden Aufgaben wahrgenommen. Wir haben den Vorstand bei der Leitung des Unternehmens regelmäßig beraten und seine Tätigkeit überwacht. In alle Entscheidungen von grundlegender Bedeutung für das Unternehmen war der Aufsichtsrat unmittelbar eingebunden. Der Vorstand unterrichtete uns regelmäßig sowohl schriftlich als auch mündlich, zeitnah und umfassend über die Unternehmensplanung, den Gang der Geschäfte, die strategische Weiterentwicklung sowie die aktuelle Lage des Konzerns. Abweichungen des Geschäftsverlaufs von den Plänen wurden uns im Einzelnen erläutert. Die strategische Ausrichtung des Unternehmens stimmte der Vorstand mit uns ab. Die für das Unternehmen bedeutenden Geschäftsvorgänge haben wir auf Basis der Berichte des Vorstands ausführlich erörtert. Den Beschlussvorschlägen des Vorstands hat der Aufsichtsrat nach gründlicher Prüfung und Beratung zugestimmt. Insgesamt fanden fünf turnusgemäße und eine außerordentliche Sitzung statt. Der Aufsichtsrat hat zudem einen Beschluss im schriftlichen Verfahren gefasst.

Der Aufsichtsratsvorsitzende stand über die Aufsichtsratssitzungen hinaus mit dem Vorstand in regelmäßigem Kontakt und hat sich über die aktuelle Entwicklung der Geschäftslage und die wesentlichen Geschäftsvorfälle informiert. In gesonderten Strategiegesprächen hat der Vorsitzende des Aufsichtsrats mit dem Vorstand die Perspektiven und die künftige Ausrichtung der einzelnen Geschäfte erörtert.

#### **Die Arbeit in den Ausschüssen des Aufsichtsrats**

Zur effizienten Wahrnehmung seiner Aufgaben hat der Aufsichtsrat insgesamt sechs Ausschüsse eingerichtet. Sie bereiten Beschlüsse des Aufsichtsrats sowie Themen, die im Plenum zu behandeln sind, vor. Darüber hinaus sind Entscheidungsbefugnisse des Aufsichtsrats auf Ausschüsse übertragen worden, soweit dies gesetzlich zulässig ist. Die Ausschussvorsitzenden berichten über die Arbeit der Ausschüsse dem Aufsichtsrat jeweils in der anschließenden Sitzung. Die Zusammensetzung der einzelnen Ausschüsse sowie die Anzahl der Sitzungen und Beschlüsse enthält die Aufstellung auf Seite 284 f.

Das **Präsidium** tagte im Berichtsjahr sieben Mal. Zudem wurden vier Beschlüsse im Umlaufverfahren gefasst. Zwischen den Sitzungen hat der Vorsitzende des Aufsichtsrats mit den Präsidiumsmitgliedern Themen von besonderer Bedeutung für den Konzern besprochen. Das Präsidium hat sich mit den Corporate-Governance-Fragen, der Vorbereitung von Entscheidungen zur Vergütung für den Vorstand sowie mit verschiedenen Personalthemen beschäftigt.

Der **Vermittlungsausschuss** musste im abgelaufenen Geschäftsjahr nicht einberufen werden. Der **Finanz- und Investitionsausschuss** tagte zwei Mal. Dabei standen im Wesentlichen die Weiterentwicklung der mittelfristigen Unternehmensstrategie sowie die Billigung von Investitionsvorhaben des Unternehmens im Mittelpunkt. Ferner wurden zwei Beschlüsse im Umlaufverfahren gefasst.

---

Der **Prüfungsausschuss** hielt sechs Sitzungen ab. Er befasste sich in Gegenwart des Abschlussprüfers sowie des Vorsitzenden des Vorstands, des Finanzvorstands und des General Counsel mit den Abschlüssen und Lageberichten der Siemens AG und des Konzerns sowie mit dem Gewinnverwendungsvorschlag und dem 20-F-Bericht für die US-amerikanische Securities and Exchange Commission (SEC). Weiter gab der Prüfungsausschuss dem Aufsichtsrat eine Empfehlung für den Vorschlag des Aufsichtsrats an die Hauptversammlung zur Wahl des Abschlussprüfers.

Gegenstand ausführlicher Beratungen waren außerdem die Erteilung des Prüfungsauftrags an den Abschlussprüfer für das Geschäftsjahr 2010, die Überwachung seiner Unabhängigkeit und Qualifikation sowie der von ihm erbrachten zusätzlichen Leistungen, die Festlegung seines Honorars sowie die prüferische Durchsicht der Quartalsabschlüsse und des Halbjahresfinanzberichts. Das Gremium hat sich ferner mit dem Rechnungslegungsprozess und dem Risikomanagementsystem des Unternehmens, mit der Wirksamkeit, der Ausstattung und den Feststellungen der internen Revision wie auch mit den Berichten über potenzielle und anhängige Rechtsstreitigkeiten auseinandergesetzt. Außerdem behandelte der Prüfungsausschuss die Umsetzung der Regelungen der Section 404 des Sarbanes-Oxley Act (SOA) und die Ergebnisse der Untersuchungen der internen Revision zur Effektivität antikorrupsionsbezogener Maßnahmen. Zudem fanden separate Treffen mit dem Abschlussprüfer statt.

Der **Compliance-Ausschuss** trat im Berichtsjahr fünf Mal zusammen. Er befasste sich in seinen Sitzungen mit den Quartalsberichten des Chief Compliance Officers beziehungsweise des Chief Counsels Compliance sowie den Schadensersatzansprüchen gegen ehemalige Vorstandsmitglieder.

### Die Themen im Aufsichtsratsplenum

Gegenstand regelmäßiger Beratungen im Plenum waren die Umsatz-, Ergebnis- und Beschäftigungsentwicklung der Siemens AG, der Sektoren und des Konzerns, die Finanzlage sowie die wesentlichen Beteiligungs- und Desinvestitionsprojekte. Der Vorstand unterrichtete regelmäßig und umfassend über die Unternehmensplanung, die strategische Weiterentwicklung, den Gang der Geschäfte sowie die aktuelle Lage des Konzerns. Der Aufsichtsrat hat sich fortlaufend über die Entwicklung und die Auswirkungen der Wirtschaftskrise informieren lassen.

In der Sitzung am 2. Dezember 2009 haben wir uns vor allem mit den Abschlüssen und den Lageberichten der Siemens AG und des Konzerns zum 30. September 2009 sowie mit der Tagesordnung für die Hauptversammlung am 26. Januar 2010 befasst, ferner mit dem Geschäftsbericht 2009, insbesondere mit dem darin enthaltenen Corporate-Governance-Bericht. Weiter hat der Aufsichtsrat den mit insgesamt neun ehemaligen Organmitgliedern geschlossenen Vergleichsvereinbarungen sowie dem Deckungsvergleich mit den sogenannten Directors-and-Officers-(D&O-)Versicherern zugestimmt und beschlossen, diese Vergleiche der Hauptversammlung am 26. Januar 2010 zur Abstimmung vorzulegen. Bei der Behandlung des Deckungsvergleichs mit den D&O-Versicherern hat sich Michael Diekmann als Vorstandsvorsitzender der Obergesellschaft eines Mitglieds des betroffenen Versicherungskonsortiums an der Diskussion und Abstimmung vorsorglich nicht beteiligt. Er tat dies, um einen möglichen Interessenkonflikt zu vermeiden. Zudem beschloss der

---

Aufsichtsrat, dass die Schadensersatzansprüche der Siemens AG gegen die ehemaligen Mitglieder des Vorstands Thomas Ganswindt und Heinz-Joachim Neubürger in Zusammenhang mit den Korruptionsvorgängen im Siemens-Konzern gerichtlich geltend gemacht werden.

In der Aufsichtsratssitzung am 25. Januar 2010 berichtete der Vorstand über die aktuelle Geschäfts- und Finanzlage des Konzerns nach Abschluss des ersten Quartals. Der Aufsichtsrat erörterte zudem die neuen Rahmenbedingungen für die Vorstandsvergütung und beschloss die Zielsetzung für die Vergütung des Vorstands im Geschäftsjahr 2010.

In der Sitzung am 28. April 2010 berichtete der Vorstand über die aktuelle Geschäfts- und Finanzlage des Konzerns nach Abschluss des zweiten Quartals des Geschäftsjahrs. Der Aufsichtsrat beschloss, die Mandate von Joe Kaeser und Hermann Requardt als Mitglieder des Vorstands mit Wirkung ab 1. April 2011 jeweils um weitere fünf Jahre zu verlängern. Weiter befasste sich der Aufsichtsrat in dieser Sitzung mit der wirtschaftlichen Lage und der Neuordnung des Sektors Healthcare, dessen Vertriebs- und Servicegeschäft in einer Einheit gebündelt wird. Der Aufsichtsrat behandelte zudem die Supply-Chain-Management-Initiative des Unternehmens und beriet über die Weiterentwicklung des Vergütungssystems für den Vorstand.

In der außerordentlichen Sitzung am 9. Juni 2010 hat der Aufsichtsrat der vorzeitigen Niederlegung des Mandats von Heinrich Hiesinger als Mitglied des Vorstands zum 30. September 2010 zugestimmt. Hierbei befasste er sich unter Einbeziehung eines externen Gutachtens mit der rechtlichen Bewertung des Wechsels von Heinrich Hiesinger zu ThyssenKrupp und gelangte zu dem Ergebnis, dass der Zustimmung zur vorzeitigen Niederlegung des Mandats keine Interessenkonflikte entgegenstünden. Zudem hat der Aufsichtsrat Brigitte Ederer mit Wirkung zum 1. Juli 2010 zum Mitglied des Vorstands und zur Arbeitsdirektorin bestellt und ihr das Ressort Corporate Human Resources zugewiesen. Siegfried Russwurm wurde mit Wirkung zum 1. Juli 2010 die Leitung des Sektors Industry übertragen.

In der Aufsichtsratssitzung am 28. Juli 2010 beschäftigten wir uns mit der Geschäfts- und Finanzlage des Unternehmens nach Abschluss des dritten Quartals. Weiterhin beschloss der Aufsichtsrat Anpassungen im Vergütungssystem für den Vorstand sowie entsprechende Änderungen des Mustervertrags für die Vorstandsmitglieder. Zudem wurden der aktualisierte Ethikkodex für Finanzangelegenheiten gebilligt und die Geschäftsverteilung im Vorstand neu geregelt.

In der Sitzung am 22. September 2010 erhielt der Aufsichtsrat vom Vorstand einen Überblick zur Lage des Unternehmens. In dieser Sitzung gab zudem der Sektor Energy dem Aufsichtsrat einen Bericht zur Situation in diesem Geschäft. Aufgrund von Neuregelungen des Deutschen Corporate Governance Kodex hat der Aufsichtsrat ferner die Geschäftsordnungen des Aufsichtsrats, des Präsidiums und des Vorstands angepasst und konkrete Ziele für die künftige Zusammensetzung des Aufsichtsrats beschlossen, die im Corporate-Governance-Bericht wiedergegeben werden (siehe Seite 23 f. dieses Berichts). Schließlich mandatierte der Aufsichtsrat einen unabhängigen externen Vergütungsberater mit der Prüfung der Angemessenheit der Vorstandsvergütung für das Geschäftsjahr 2010.

---

## Corporate Governance Kodex

Der Aufsichtsrat hat sich mit den Inhalten des Deutschen Corporate Governance Kodex befasst. Informationen zur Corporate Governance im Unternehmen sowie einen ausführlichen Bericht zu Höhe und Struktur der Vergütung von Aufsichtsrat und Vorstand finden Sie auf den Seiten 34 bis 48 dieses Berichts. Vorstand und Aufsichtsrat haben in ihren Sitzungen am 15. beziehungsweise 22. September 2010 beschlossen, eine uneingeschränkte Entsprechenserklärung gemäß § 161 AktG abzugeben, die den Aktionären auf der Website der Gesellschaft dauerhaft zugänglich gemacht wurde.

## Jahres- und Konzernabschlussprüfung ausführlich erörtert

Die Ernst & Young GmbH Wirtschaftsprüfungsgesellschaft hat den Jahresabschluss und den Konzernabschluss sowie den Zusammengefassten Lagebericht für die Siemens AG und den Konzern zum 30. September 2010 nach HGB-Grundsätzen geprüft und mit dem uneingeschränkten Bestätigungsvermerk versehen. Der Jahresabschluss der Siemens AG, der Konzernabschluss und der Zusammengefasste Lagebericht für die Siemens AG und den Konzern wurden gemäß § 315a HGB auf der Grundlage der internationalen Rechnungslegungsstandards IFRS, wie sie in der Europäischen Union (EU) anzuwenden sind, beziehungsweise unter Beachtung von HGB-Grundsätzen aufgestellt. Der Abschlussprüfer hat die Prüfung unter Beachtung der vom Institut der Wirtschaftsprüfer (IDW) festgestellten deutschen Grundsätze ordnungsmäßiger Abschlussprüfung sowie unter ergänzender Beachtung der International Standards on Auditing (ISA) vorgenommen. Die genannten Unterlagen und der Vorschlag des Vorstands für die Verwendung des Bilanzgewinns sind vom Vorstand rechtzeitig an uns verteilt worden. Sie wurden in den Sitzungen des Prüfungsausschusses am 9. und 30. November 2010 intensiv behandelt.

Die Prüfungsberichte der Ernst & Young GmbH Wirtschaftsprüfungsgesellschaft lagen allen Mitgliedern des Aufsichtsrats vor und wurden in der Bilanzsitzung des Aufsichtsrats am 1. Dezember 2010 in Gegenwart des Abschlussprüfers umfassend behandelt. Der Abschlussprüfer berichtete über die wesentlichen Ergebnisse seiner Prüfung sowie darüber, dass keine wesentlichen Schwächen des internen Kontrollsystems und des Risikomanagementsystems vorlägen. In dieser Sitzung hat der Vorstand die Abschlüsse der Siemens AG und des Konzerns sowie das Risikomanagementsystem erläutert. Der Abschlussprüfer ging ferner auf Umfang, Schwerpunkte sowie Kosten der Abschlussprüfung ein.

Wir stimmen den Ergebnissen der Abschlussprüfung zu. Nach dem abschließenden Ergebnis der Prüfung durch den Prüfungsausschuss und unserer eigenen Prüfung sind keine Einwendungen zu erheben. Der Aufsichtsrat hat die vom Vorstand aufgestellten Abschlüsse gebilligt; sie sind damit festgestellt. Dem Vorschlag des Vorstands, den Bilanzgewinn zur Zahlung einer Dividende von 2,70 Euro je dividendenberechtigter Stückaktie zu verwenden und den hieraus auf von der Gesellschaft zum Zeitpunkt der Hauptversammlung gehaltene eigene Aktien entfallenden Betrag auf neue Rechnung vorzutragen, stimmen wir zu.

---

### Veränderungen im Aufsichtsrat und im Vorstand

Mit Wirkung zum 1. Juli 2010 bestellte der Aufsichtsrat Brigitte Ederer zum ordentlichen Mitglied des Vorstands und zur Arbeitsdirektorin und übertrug ihr die Leitung des Vorstandsressorts Corporate Human Resources. Heinrich Hiesinger legte sein Mandat als Vorstand des Unternehmens mit Wirkung zum 30. September 2010 nieder und übergab die Leitung des Sektors Industry mit Wirkung zum 1. Juli 2010 an Siegfried Russwurm.

Der Aufsichtsrat dankt den Mitgliedern des Vorstands, den Mitarbeiterinnen und Mitarbeitern sowie den Arbeitnehmervertretungen der Siemens AG und allen Konzerngesellschaften für ihre Arbeit. Sie haben erneut zu einem für Siemens geschäftlich erfolgreichen Jahr beigetragen.

Für den Aufsichtsrat



Dr. Gerhard Cromme  
Vorsitzender  
Berlin und München, 1. Dezember 2010



# Sehr geehrte Aktionärinnen und Aktionäre

---

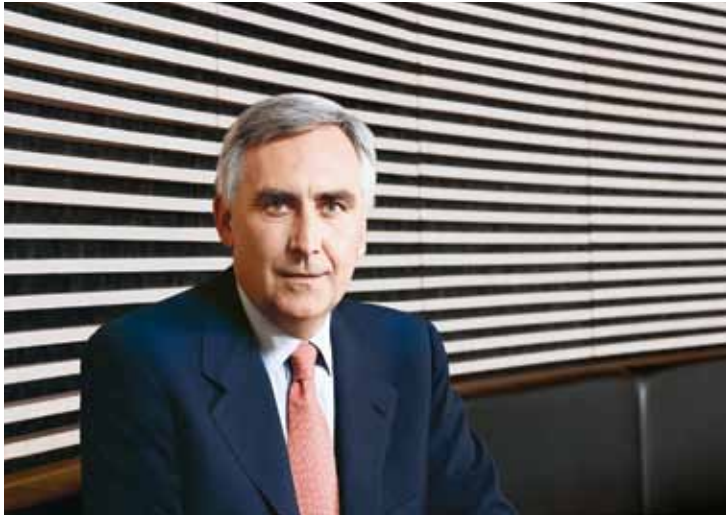

Nachhaltiges, kapitaleffizientes Wachstum und kontinuierliche Verbesserung im Sinne unserer Kunden, Mitarbeiter und Aktionäre: Das sind die Maßgaben unseres Handelns. Unser Erfolg im Geschäftsjahr 2010 zeigt, dass wir auf dem richtigen Weg sind – ungeachtet der immer noch schwierigen wirtschaftlichen Rahmenbedingungen in Teilen der Welt.

---

### Weltwirtschaftliche Entwicklung und Vergleich zu den Wettbewerbern

Siemens konnte das Geschäftsjahr 2010 in einem herausfordernden weltwirtschaftlichen Umfeld mit großem Erfolg abschließen. Basis dafür waren unsere auf Nachhaltigkeit ausgerichtete Unternehmenspolitik und die großen Leistungen von Mitarbeiterinnen, Mitarbeitern und Management. Wo immer wir Nachfragetäler überbrücken konnten, haben wir die Möglichkeiten dafür genutzt. So haben wir beispielsweise gerade zu Beginn des Geschäftsjahrs an unseren deutschen Standorten das Instrument der Kurzarbeit eingesetzt.

Während wir in der ersten Hälfte des Geschäftsjahrs 2010 noch sehr vorsichtig von einer Erholung der Weltwirtschaft gesprochen haben, hat sich im weiteren Verlauf des Berichtszeitraums die Belegung auf breiter Basis weltweit fortgesetzt. Besonders erfreulich ist, dass die Wirtschaft nicht nur in den ohnehin wachstumsstarken BRIC-Ländern Brasilien, Russland, Indien und China sowie in der Golfregion angezogen hat, sondern auch an unseren angestammten Märkten in den Industrieländern, darunter besonders stark in unserem Heimatland Deutschland. Staatliche Infrastrukturmaßnahmen und Konjunkturprogramme hatten hierauf einen starken Einfluss.

Während der Krise haben wir uns im Vergleich zu unseren wichtigsten Wettbewerbern gut geschlagen und konnten das Unternehmen wieder zurück in die Spitzengruppe der Wettbewerber führen. Diese positive Entwicklung ist in erster Linie unseren frühzeitig und noch vor der Krise in die Wege geleiteten Maßnahmen zu verdanken. So hatten wir die Komplexität unserer Unternehmensorganisation reduziert und unser Führungssystem gestärkt. Wir haben Verwaltungs- und Vertriebskosten reduziert und gute Ergebnisbeiträge aus unserer Einkaufsinitiative erzielt. Als Fazit kann ich ziehen: Heute steht Siemens im Wettbewerbsvergleich wieder ausgezeichnet da und besitzt hohe Schlagkraft.

### Bestes operatives Ergebnis in der Unternehmensgeschichte

Im Geschäftsjahr 2010 haben wir das bislang beste operative Ergebnis der Unternehmensgeschichte erzielt. Das Ergebnis Summe Sektoren stieg um 4 % auf 7,8 Milliarden Euro – trotz Wertminderungen in Höhe von 1,2 Milliarden Euro im Sektor Healthcare. Der Konzerngewinn nach Steuern kletterte um 63 % auf 4,1 Milliarden Euro. Das Wachstum hat im Jahresverlauf wieder an Fahrt gewonnen. Während Auftragseingang und Umsatz in den ersten beiden Geschäftsquartalen zurückgingen, legten beide in der zweiten Jahreshälfte dann zu. Per saldo stieg der Auftragseingang im Geschäftsjahr 2010 um 3 % auf gut 81 Milliarden Euro, der Umsatz stabilisierte sich bei 76 Milliarden Euro.

Unsere Mitarbeiterinnen und Mitarbeiter haben einen unschätzbaren Anteil daran, dass es gelungen ist, Siemens in der seit Generationen schwersten Krise der Weltwirtschaft sicher und stabil auf Kurs zu halten! Diese hervorragende Leistung haben wir mit einer einmaligen Sonderzahlung an alle Mitarbeiter, die nicht dem oberen Management angehören, anerkannt. Insgesamt wurden hierfür weltweit rund 310 Millionen Euro als Prämien bereitgestellt.

---

Sie, unsere Aktionärinnen und Aktionäre, wollen wir mit einer deutlich erhöhten Dividende am Ergebnis des abgelaufenen Geschäftsjahrs teilhaben lassen. Aufsichtsrat und Vorstand schlagen Ihnen daher eine Dividende von 2,70 EUR – das sind knapp 70 % mehr als im Vorjahr – zur Abstimmung auf der Hauptversammlung im Januar 2011 vor. Dies entspricht einer Ausschüttungsquote von 46 %, exklusive der nicht zahlungswirksamen Abschreibungen im Sektor Healthcare.

Mit diesem Dividendenvorschlag definieren wir ein neues Niveau und beginnen ein neues Kapitel für Siemens und Sie als die Eigentümer des Unternehmens. Völlig neu ist auch, dass Siemens nunmehr mit dem neuen Zielsystem des Unternehmens eine klare Orientierung für die künftige Dividendenpolitik gibt. Gemessen am Nachsteuergewinn – bereinigt um außergewöhnliche, nicht zahlungswirksame Faktoren – ist es unser Ziel, dass künftig stets zwischen 30 und 50 % an die Eigentümer ausgeschüttet werden. Diese neue Dividendenpolitik enthält eine klare Botschaft: Siemens steht für Beständigkeit und schafft nachhaltig Wert.

### Stabilisierende und geschäftstreibende Faktoren und Geschäfte

Zum hervorragenden Ergebnis im abgelaufenen Geschäftsjahr haben alle unsere Geschäfte und Funktionen wichtige Beiträge geleistet. Ich möchte beispielhaft nur zwei herausgreifen. Zum einen unser Windenergiegeschäft. Unsere Division Renewable Energy hat das stärkste Jahr aller Divisionen beim Auftragseingang erreicht und inzwischen die Neun-Milliarden-Euro-Marke beim Auftragsbestand überschritten. Und die Signale des Windenergiemarkts für die Zukunft sind weiter positiv. So ist etwa in den Jahren 2009 und 2010 allein der europäische Markt für Offshore-Windanlagen jeweils um mehr als 50 % gewachsen. Auch in anderen Regionen sehen wir eine deutlich steigende Nachfrage nach Windenergieanlagen. Im aufstrebenden Offshore-Windgeschäft sind wir weltweit die Nummer eins.

Windenergieanlagen sind Teil des Siemens-Umweltportfolios. Dessen Umsatz ist im Geschäftsjahr 2010 auf rund 28 Milliarden Euro angewachsen. Siemens ist damit weltweit einer der bedeutendsten Anbieter von umweltfreundlichen Technologien. Unsere Kunden haben mit unseren Produkten und Lösungen im selben Zeitraum rund 270 Millionen Tonnen Kohlendioxid eingespart.

Zum anderen gibt die Entwicklung unserer Division Mobility Anlass zu großer Freude. Züge und Bahntechnik von Siemens sind gefragt wie nie zuvor – und das weltweit. Der neue Velaro D oder ICE, wie er bei der Deutschen Bahn genannt wird, ist der modernste und effizienteste Hochgeschwindigkeitszug Europas – und schon in der vierten Generation unterwegs. Bereits seine Vorgänger haben bewiesen, welches Erfolgspotenzial in diesem Zug steckt. Selbst in Krisenzeiten war er international ein Verkaufsschlager: in Spanien als Velaro E, in Russland als Sapsan und in China als Velaro CN.

---

### Erfolgreicher Abschluss von Fit42010

Das Geschäftsjahr 2010 war auch der Schlussstein unseres Transformationsprogramms Fit42010. Stoßrichtung dieses Programms war es, Siemens in die Spitzengruppe der weltweiten Wettbewerber zurückzuführen. Dazu hatten wir uns klare Ziele für Wachstum, Profitabilität und Liquidität gesetzt. Die Ziele haben wir weitestgehend erreicht – ein großer Erfolg vor dem Hintergrund der globalen Rezession und der negativen Auswirkungen der Finanzkrise, die das Wachstum unserer Geschäfte in den vergangenen beiden Jahren beeinträchtigt haben. Siemens ist nun wieder dort, wo das Unternehmen hingehört: unter den Besten. In vielen unserer Geschäfte sind wir in der führenden Marktposition oder auf einer sehr guten Nummer-zwei-Position.

### Anerkennung unserer Leistungen bei Politik und Gesellschaft

Unternehmerische Leistung wird aber erst dann wertvoll, wenn sie auch wertgeschätzt wird. Bei Siemens zeigt sich dies in unterschiedlicher Art und Weise: Zunächst anhand Ihres Vertrauens, also des Vertrauens unserer Aktionärinnen und Aktionäre, die ihr Kapital langfristig in unser Unternehmen investieren. Dann anhand des Stolzes unserer Mitarbeiter, die sich nicht nur für Siemens engagieren, sondern ihr Unternehmen als attraktiven Arbeitgeber weiterempfehlen. Und schließlich am Zuspruch und an der Treue unserer Kunden, die durch ihre Aufträge unseren Geschäftserfolg tragen.

Die Wertschätzung von Aktionären, Mitarbeitern und Kunden zu gewinnen: Das ist uns Verpflichtung. Sie ist der Antrieb für unsere tägliche Arbeit und ein Garant für die dauerhafte Stabilität unseres Unternehmens. Dabei ist für uns als Infrastrukturunternehmen, großer Arbeitgeber und Wirtschaftsfaktor in unserem jeweiligen regionalen Umfeld auch der gesellschaftspolitische Dialog mit Regierungen und Öffentlichkeit von zentraler Bedeutung. Die Anerkennung, die uns im abgelaufenen Geschäftsjahr gerade hier zuteil wurde, freut uns daher besonders.

Ein Höhepunkt war der Besuch des Präsidenten der Vereinigten Staaten von Amerika, Barack Obama, in unserer Rotorblätterfertigung für Windturbinen in Fort Madison. Während dieses ersten Besuchs eines US-Präsidenten bei Siemens in den USA wurden wir mit den Worten geehrt: »Sie zeigen Amerika seine Zukunft«. Eine größere Anerkennung des amerikanischen Präsidenten für die Rolle von Siemens in den USA ist kaum vorstellbar.

Ebenso erfreulich waren die beiden Besuche des chinesischen Premierministers Wen Jiabao in unseren Fabriken in Tianjin und Xi'an. Mit seiner Aussage »Siemens ist ein chinesisches Unternehmen« hat er unsere Verwurzelung und unsere Anerkennung in China gewürdigt. Dies belegt die hohe Wertschätzung, die unser besonnenes und auf Langfristigkeit ausgelegtes Handeln im Land findet.

Große Freude ausgelöst hat bei uns auch die gemeinsame Anwesenheit der deutschen Bundeskanzlerin Angela Merkel und des russischen Präsidenten Dimitri Medwedew bei der Unterzeichnung umfassender Kooperationsvereinbarungen mit russischen Partnern im Bahn- und Windenergiebereich Mitte Juli 2010 in Jekaterinburg. Es ist ein Beispiel für zahlreiche Begegnungen mit der deutschen Bundeskanzlerin und der russischen Führung im vergangenen Jahr.

---

Eine Begegnung, die mich persönlich besonders bewegt hat, war das Zusammentreffen mit dem ehemaligen südafrikanischen Staatspräsidenten und Friedensnobelpreisträger Nelson Mandela. Am Rande unseres Jubiläums zum 150. Geburtstag von Siemens in Südafrika hatte ich die Ehre, von ihm empfangen zu werden. Diese herausragende Geste war Ausdruck hoher Anerkennung, die Siemens für seine Beiträge zur Entwicklung des Landes und seine verantwortungsbewusste Haltung im Umgang mit den Mitarbeiterinnen und Mitarbeitern und dem gesellschaftlichen Umfeld in Südafrika seit Langem zuteil wird.

All diese Begegnungen sind Zeichen der Wertschätzung von Siemens in der Welt. Sie zeigen, dass nicht nur einzelne Aspekte unserer Leistungen herausgehoben werden, sondern dass unser Unternehmen als weltweit agierender Infrastrukturanbieter in seiner Gesamtheit wahrgenommen und gewürdigt wird. Siemens gilt als »guter Unternehmensbürger« überall auf der Welt. Hierauf können und dürfen wir, wie viele Vorgängergenerationen, die dieses Kapital mit aufgebaut haben, zu Recht stolz sein.

### Strategische Themen der Zukunft

Nun geht es darum, das Unternehmen von der erreichten Basis aus nachhaltig weiterzuentwickeln. Dazu haben wir drei strategische Stoßrichtungen definiert, die uns den Weg in die Zukunft weisen:

1. den Fokus auf innovationsgetriebene Wachstumsmärkte richten,
2. ein starker Partner unserer Kunden vor Ort sein und
3. die Kraft von Siemens nutzen.

Neuland betreten, grenzüberschreitend denken und handeln sowie Herausforderungen aus unterschiedlichen Perspektiven betrachten und bewerten: Das war und bleibt unsere Erfolgsbasis. Wir setzen gleichermaßen auf lokale Präsenz und lokale Produkte wie auf die hohe Wertschätzung, die die deutsche Ingenieurskunst international genießt. Unsere lokale Nähe zum Kunden überall auf der Welt sichert uns den Marktzugang. Kein anderes Industrieunternehmen ist in rund 190 Ländern zu Hause – und das häufig schon seit 100 Jahren und länger!

Wir wollen unsere technologischen wie geschäftlichen Perspektiven vor allem auf denjenigen Märkten weiterentwickeln, die in besonderem Maße von Innovationen und Wachstum geprägt sind. Damit eröffnen wir uns neue Wege zur Entwicklung unseres Geschäfts auf den attraktiven Wachstumsmärkten von morgen.

Unser weltweit einzigartiges Umweltportfolio ist dabei von zentraler Bedeutung. Hier wollen wir besonders stark wachsen und unsere führende Stellung weiter stärken. In den wachstumsstarken Schwellenländern wollen wir zum einen unsere Präsenz und unsere Wertschöpfungstiefe sowie die lokale Geschäftsverantwortung ausweiten. Zum anderen werden wir die Palette unserer Produkte, Lösungen und Dienstleistungen für die Anforderungen gerade an diesen sich dynamisch entwickelnden Märkten erweitern. Von unserem Erfolg dort profitieren auch unsere deutschen Mitarbeiter und unsere mittelständischen Partner in Deutschland mit ihren Beiträgen zu unserem globalen Geschäft.



---

Mit anspruchsvollen Aus- und Weiterbildungsprogrammen wollen wir die Kompetenzen und Qualifikationen unserer Mitarbeiter weltweit beständig voranbringen – und dies während des gesamten Berufswegs. Gleichzeitig unterstützen wir damit den Ruf von Siemens als attraktivem Arbeitgeber auf den immer stärker umkämpften globalen Arbeitsmärkten.

Ein Grundstein unseres Erfolgs ist nicht zuletzt unsere Unternehmenskultur. Sie ist geprägt von unseren Unternehmenswerten: Verantwortungsvoll – Exzellent – Innovativ. Diese Werte sind Kern und Ankerpunkt unseres Integritätsverständnisses. Für alle Aspekte unseres unternehmerischen Handelns haben wir transparente und verbindliche Grundsätze formuliert. Nach ihnen richten wir uns ohne Wenn und Aber. Diesen Anspruch stellen wir nicht nur an uns selbst, wir stellen ihn auch an unsere Partner und Lieferanten. Die Spitzenpositionen beim diesjährigen Dow Jones Sustainability Index sowie beim Carbon Disclosure Project bestätigen diese Grundhaltung.

Wir haben auch für die Zukunft ambitionierte Ziele und sehen diese als Ansporn, uns weiter zu verbessern. So investieren wir bis Ende 2012 rund 100 Millionen Euro, um unsere Werke noch »grüner« zu machen. Unser Ziel ist eine Verbesserung der Energie- und CO<sub>2</sub>-Effizienz um 20 % bis Ende 2011. Diesen »grünen Check« bieten wir auch unseren Lieferanten an. Wir wollen das erste Unternehmen mit einer durchgehend umweltfreundlichen Lieferkette werden.

### One Siemens

Mit dem erfolgreichen Abschluss unseres Programms Fit42010 liegen zwölf Jahre Transformation hinter dem Unternehmen. Dazu haben viele beigetragen, allen sei dafür Dank gesagt. Siemens ist wieder ein normales Unternehmen der Spitzenklasse!

Auf diesem Ausgangsniveau haben wir nun mit unserem neuen Zielsystem One Siemens den Rahmen definiert für weitere kontinuierliche Verbesserung im Sinne unserer Kunden, Mitarbeiter und Aktionäre. One Siemens gibt unseren Weg zur nachhaltigen Weiterentwicklung des Unternehmens in den nächsten Jahren vor. Es enthält Kenngrößen für Wachstum, für Kapitaleffizienz und Profitabilität sowie für die Optimierung unserer Kapitalstruktur. Dazu gehört auch unsere künftige Dividendenpolitik, mit der wir jedem langfristig ausgerichteten Anleger eine verlässliche Orientierung geben wollen. Mit unserem Dividendenvorschlag von 2,70 Euro für 2010 haben wir zugleich ein neues Dividendenniveau definiert.

Mit One Siemens schlagen wir ein neues Kapitel für Siemens auf. Bitte begleiten Sie uns auf diesem Weg – mit Ihrem Vertrauen und Ihrem Engagement.



Peter Löscher  
Vorsitzender des Vorstands der Siemens AG

Wertentwicklung des Siemens-Aktiendepots im GJ 2010 (bei Wiederanlage der Dividende; indexiert)

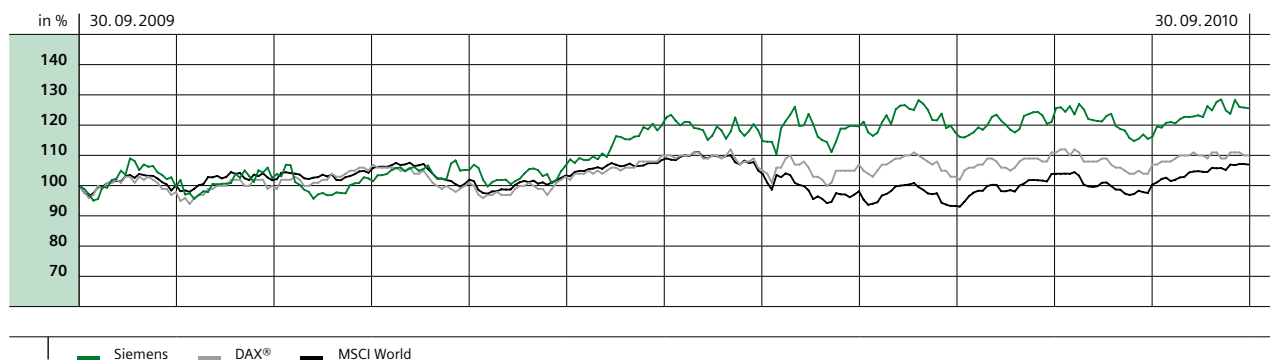

Zum Ende der Rechnungsperiode übertraf die Kursentwicklung der Siemens-Aktie die der wichtigsten nationalen und internationalen Leitindizes sowie vieler Wettbewerber deutlich. Nach einem schwankenden Verlauf zu Beginn des Geschäftsjahrs hat sich der Kurs der Siemens-Aktie seit März 2010 kontinuierlich erholt. Nachdem wir in den zurückliegenden Jahren auch in wirtschaftlich schwierigen Zeiten unsere Dividende konstant halten konnten, schlugen Vorstand und Aufsichtsrat für dieses Jahr eine deutlich erhöhte Dividende in Höhe von 2,70 EUR pro Aktie vor. Die Ausschüttungsquote beträgt 58 % (exklusive der »nicht zahlungswirksamen Effekte« = 46%). Die Siemens AG ist weiterhin sehr solide finanziert und konnte im abgelaufenen Geschäftsjahr ihre Nettoverschuldung signifikant reduzieren. Siemens verfügt unverändert über gute Kreditratings im Investment-Grade-Bereich – insbesondere im Vergleich zu anderen Anbietern am Markt.

Die Siemens-Aktie hat sich in diesem Marktumfeld überdurchschnittlich entwickelt und schloss zum Ende des Geschäftsjahrs mit einem Kurs von 77,43 EUR pro Aktie. Dies entspricht einem Anstieg von 22,4 %, verglichen mit dem Kurs zum 30. September des Vorjahrs. Bei Wiederanlage der Dividende betrug der Wertzuwachs der Aktie 25,4 (im Vj. 1,3) %. Damit entwickelte sich die Siemens-Aktie deutlich besser als die deutschen und internationalen Aktienmärkte, deren Leitindizes DAX 30 und MSCI World im gleichen Zeitraum 9,8 % beziehungsweise 6,8 % Wertzuwachs erzielten.

Das Vermögen eines Anlegers, der zu Beginn des Geschäftsjahrs 2006 für 1.000 EUR Siemens-Aktien gekauft und die zugeflossene Dividende wieder in das Papier investiert hat, stieg bis zum Ende des Berichtsjahrs auf 1.345 EUR. Damit liegt die Siemens-Aktie mit einer Rendite von 6,0 % pro Jahr spürbar über den Renditen des DAX 30 von 4,2 % und des MSCI World von 1,4 %.

## AKTIENMÄRKTE – ERHOLUNG IM JAHR 2010

Blickt man auf die wirtschaftliche Entwicklung, so war das Marktumfeld für Aktien zu Beginn des Geschäftsjahrs 2010 von hoher Volatilität und anhaltender Unsicherheit geprägt. Nachdem sich die Notierungen zu Beginn des Geschäftsjahrs 2010 in einem engen Korridor bewegt hatten, entwickelten sie sich sowohl am deutschen als auch am europäischen Aktienmarkt ab März sukzessive nach oben, sodass zum 30. September die wichtigsten Indizes deutlich über den entsprechenden Vorjahreswerten lagen.

Langfristige Wertentwicklung der Siemens-Aktie im Marktvergleich (durchschnittliche jährliche Steigerung bei Wiederanlage der Dividende)

|                  | GJ 2006 – GJ 2010 |
|------------------|-------------------|
| Siemens          | 6,0%              |
| DAX <sup>®</sup> | 4,2%              |
| MSCI World       | 1,4%              |

## DIVIDENDENERHÖHUNG VORGESCHLAGEN

Der Vorstand und der Aufsichtsrat schlagen der Hauptversammlung eine um 1,10 EUR auf 2,70 EUR deutlich erhöhte Dividende zur Ausschüttung vor. Nach drei Jahren eines konjunkturell schwächeren Umfelds, in denen die Dividende stabil gehalten wurde, trägt das Unternehmen damit der verbesserten Ertragssituation im abgelaufenen Geschäftsjahr Rechnung. Die Ausschüttungsquote liegt bei 58 % (exklusive der »nicht zahlungswirksamen Effekte« = 46 %). Mit diesem Dividendenvorschlag setzen wir die Tradition der attraktiven Dividendenspolitik für unsere Anleger fort.

## AKTIONÄRSSTRUKTUR

Mit rund 708.000 Aktionären gehört die Siemens AG weltweit zu den größten Publikumsgesellschaften. Eine im September 2010 durchgeführte Analyse der Aktionärsstruktur hat gezeigt, dass Aktionäre in Deutschland mit rund 29 % der ausstehenden Aktien den größten Anteil unseres Grundkapitals halten. Aktionäre aus den USA besitzen rund 21 %, aus dem Vereinigten Königreich sind es 13 %.

Derzeit werden rund 65 % der ausstehenden Siemens-Aktien von institutionellen Investoren sowie rund 19 % von privaten Anlegern und rund 6 %\* von Mitgliedern der Siemens-Familie gehalten.

### Dividende

| Geschäftsjahr                       | GJ 2010    | GJ 2009    | GJ 2008    | GJ 2007    | GJ 2006    |
|-------------------------------------|------------|------------|------------|------------|------------|
| Dividende pro Aktie (in EUR)        | 2,70       | 1,60       | 1,60       | 1,60       | 1,45       |
| Dividendenrendite (in %)¹           | 3,5        | 2,4        | 3,6        | 1,9        | 1,8        |
| Kurs ex Dividende                   | 26.01.2011 | 27.01.2010 | 28.01.2009 | 25.01.2008 | 26.01.2007 |
| Ergebnis nach Steuern (in Mio. EUR) | 4.068      | 2.497      | 5.886      | 4.038      | 3.345      |
| Ausschüttungssumme (in Mio. EUR)    | 2.355²     | 1.388      | 1.380      | 1.462      | 1.292      |
| Ausschüttungsquote (in %)³          | 58         | 56         | 23         | 36         | 43         |

- 1 Dividendenzahlung / Kurs der Siemens-Aktie am Tag der Hauptversammlung; für das GJ 2010: Dividendenzahlung / Kurs der Siemens-Aktie zum Geschäftsjahresende.
- 2 Auf Basis der derzeit erwarteten Zahl der dividendenberechtigten Aktien.
- 3 Exklusive der »nicht zahlungswirksamen Effekte« in 2009 und 2010 (NSN-Abschreibung und DX-Abschreibungen) ergibt sich eine Ausschüttungsquote von 34 % in 2009 und 46 % in 2010.

### Art der Investoren

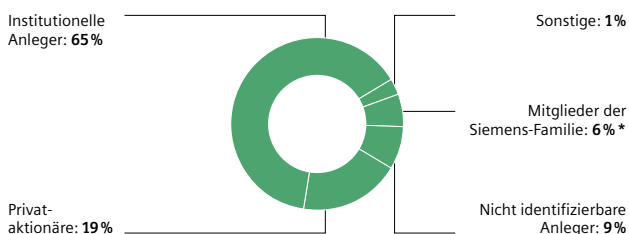

### Regionale Struktur

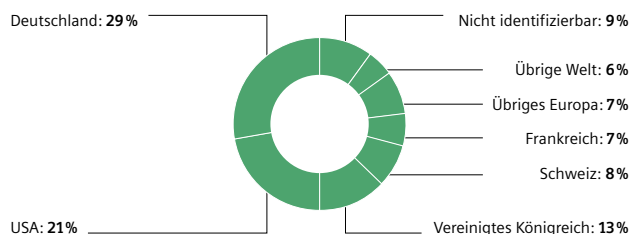

\* Diese Zahl beinhaltet einen Anteil von 1,25 %, über den die von Siemens-Vermögensverwaltung GmbH mithilfe von Vollmachten die Stimmrechte kontrolliert, und einen Anteil von 3,03 % der Werner von Siemens Stiftung Zug, Schweiz, den diese uns angezeigt hat.

## KREDITRATINGS

Die Siemens AG verfügt über gute Kreditratings im Investment-Grade-Bereich: »A1/P-1/Ausblick stabil« bei der Ratingagentur Moody's Investors Service und »A+ / A-1/Ausblick stabil« bei der Ratingagentur Standard & Poor's sind sehr positive Werte, insbesondere im Vergleich zu den Wettbewerbern im Industriegüterbereich. Unsere solide finanzielle Ausstattung erlaubt uns den uneingeschränkten Zugang zu den internationalen Geld- und Kapitalmärkten.

| Kreditratings               | 30. September 2010        |                   | 30. September 2009        |                   |
|-----------------------------|---------------------------|-------------------|---------------------------|-------------------|
|                             | Moody's Investors Service | Standard & Poor's | Moody's Investors Service | Standard & Poor's |
| Langfristige Finanzschulden | A1                        | A+                | A1                        | A+                |
| Kurzfristige Finanzschulden | P-1                       | A-1               | P-1                       | A-1               |

Die Nettoverschuldung der Siemens AG betrug zum Ende des Geschäftsjahrs 5.560 Mio. EUR – bei Zahlungsmitteln und Zahlungsmitteläquivalenten von 14.108 Mio. EUR.

Weiterführende Informationen zu den Kreditratings und Finanzschulden finden Sie auf Seite 105 f.

## SIEMENS AM KAPITALMARKT

Unsere Aufgabe, einen intensiven Dialog mit dem Kapitalmarkt zu führen, nehmen wir sehr ernst: Wir pflegen intensive Beziehungen zu unseren Aktionären und halten diese über alle wichtigen Entwicklungen im Siemens-Konzern auf dem Laufenden.

Im Rahmen unserer Investor-Relations-Arbeit informieren wir unsere Anteilseigner mit Quartals-, Halbjahres- und Jahresberichten über die Entwicklung im Konzern. Engen Kontakt zu den Investoren halten auch der Vorstandsvorsitzende und der Finanzvorstand durch Roadshows und Konferenzen. Zudem veranstaltet Siemens sogenannte Sektor-Kapitalmarkttag (Sector Capital Markets Days), also Veranstaltungen, bei denen das jeweilige Sektor-Management Investoren und Analysten die Geschäftsstrategie und das Marktumfeld erläutert.

Ergänzend hierzu bieten wir umfangreiche Informationen über das Internet; unter [www.siemens.com/investoren](http://www.siemens.com/investoren) werden Quartals-, Halbjahres- und Jahresfinanzberichte, Analystenpräsentationen und Pressemitteilungen publiziert, darunter der Finanzkalender für das laufende Jahr mit allen wichtigen Veröffentlichungsterminen und dem Termin der Hauptversammlung.

### Kapitalmarktorientierte Kennzahlen (in EUR, wenn nicht anders angegeben)

|                                                  | GJ 2010 <sup>1</sup> | GJ 2009 <sup>1</sup> |
|--------------------------------------------------|----------------------|----------------------|
| <b>Börsenkurs</b> (Xetra-Schlusskurs)            |                      |                      |
| Höchst                                           | 79,37                | 66,45                |
| Tiefst                                           | 60,20                | 35,52                |
| Geschäftsjahresende                              | 77,43                | 63,28                |
| Anzahl Aktien (30.09. in Mio. Stück)             | 914                  | 914                  |
| Börsenkapitalisierung (in Mio. EUR) <sup>2</sup> | 67.351               | 54.827               |
| Ergebnis je Aktie – fortg. Aktivitäten           | 4,54                 | 2,60                 |
| Ergebnis je Aktie <sup>3</sup>                   | 4,49                 | 2,65                 |
| Dividende                                        | 2,70 <sup>4</sup>    | 1,60                 |

- 1 Geschäftsjahr: 1. Oktober bis 30. September.
- 2 Auf Basis ausstehender Aktien.
- 3 Auf Basis der fortgeführten und nicht fortgeführten Aktivitäten.
- 4 Vorschlag auf der Hauptversammlung.

## AKTIENKULTUR/AKTIENPROGRAMME

Siemens möchte mehr Mitarbeiter zu Aktionären machen und bietet deshalb seinen Vorständen und der Belegschaft die Teilnahme an verschiedenen aktienbasierten Vergütungsprogrammen an: Aktienzusagen, Aktienoptionsplan, Share-Matching-Programm (gebildet aus dem Basis-Aktien-Programm, dem Share Matching Plan und dem Monatlichen Investitionsplan) sowie Jubiläumsaktien. Im Rahmen dieser Programme wurden im Geschäftsjahr 2010 3.411.245 Siemens-Aktien wieder ausgegeben. Weitere Aktienaushändigungen erwarten wir im Gefolge noch nicht erdienter und ausstehender Zusagen unter den verschiedenen Programmen. Weitere Informationen zur aktienbasierten Vergütung finden Sie in Ziffer 34 des Anhangs zum Konzernabschluss.

Die konzernweit geltende Aktienbesitz-Richtlinie (*Share Ownership Guideline*) sieht vor, dass die Mitglieder des Vorstands und die obersten rund 600 Führungskräfte zwischen 50 und 300 % ihres Grundeinkommens dauerhaft in Siemens-Aktien halten müssen.

Weiterführende Informationen zu den Mitarbeiterbeteiligungsprogrammen finden Sie auf den Seiten 250 ff.

# Corporate Governance

- 
- 23 Corporate-Governance-Bericht
  - 29 Erklärung zur Unternehmensführung nach § 289a HGB (Bestandteil des Zusammengefassten Lageberichts)
  - 30 Compliance-Bericht
  - 34 Vergütungsbericht (Bestandteil des Anhangs zum Konzernabschluss)
-



---

Corporate Governance bildet die Grundlage aller unserer Entscheidungs- und Kontrollprozesse. Sie steht für eine verantwortungsbewusste, wertebasierte und auf den langfristigen Erfolg ausgerichtete Führung und Kontrolle des Unternehmens, eine zielgerichtete und effiziente Zusammenarbeit zwischen Vorstand und Aufsichtsrat, die Achtung der Interessen unserer Aktionäre und Mitarbeiter, Transparenz und Verantwortung bei allen unternehmerischen Entscheidungen sowie einen angemessenen Umgang mit Risiken.

Die Siemens AG entspricht sämtlichen Empfehlungen des Deutschen Corporate Governance Kodex (»Kodex«), der im Jahr 2002 erlassen und zuletzt im Mai 2010 erweitert wurde, ohne Ausnahme.

Vorstand und Aufsichtsrat der Siemens AG haben sich eingehend mit der Erfüllung der Vorgaben des Kodex, insbesondere mit den neuen Anforderungen vom 26. Mai 2010, befasst. Auf der Basis dieser Beratungen wurde die unten (Seite 29) aufgeführte Entsprechenserklärung zum Kodex verabschiedet. Sie ist auf unserer Internetseite veröffentlicht und wird bei Änderungen aktualisiert. Die Siemens AG erfüllt freiwillig auch die nicht obligatorischen Anregungen des Kodex.

Aufgrund der Notierung unserer Aktien an der New York Stock Exchange (»NYSE«) unterliegt die Siemens AG bestimmten US-amerikanischen Kapitalmarktgesetzen (einschließlich des Sarbanes-Oxley Act »SOA«) sowie den Regeln und Vorschriften der US-amerikanischen Börsenaufsicht Securities and Exchange Commission (»SEC«) und der NYSE. Zur Umsetzung der Bestimmungen des SOA haben wir unter anderem ein aus den Leitern zentraler Unternehmenseinheiten bestehendes Offenlegungskomitee (»Disclosure Committee«) eingerichtet, das die Aufgabe hat, bestimmte finanzielle und nicht finanzielle Informationen zu überprüfen und unseren Vorstand bei seiner Entscheidung über deren Veröffentlichung zu beraten. Zusätzlich wurde ein Zertifizierungsverfahren eingeführt, in dem das Management der Sektoren, Divisionen, Sektorübergreifenden Geschäfte, Sektorübergreifenden Dienstleistungen, regionalen Clustern sowie bestimmter zentraler Unternehmenseinheiten, unterstützt durch Zertifizierungen des Managements von Einheiten unter deren Verantwortung, verschiedene Angaben bestätigen muss. Diese internen Zertifizierungen dienen dem Vorstandsvorsitzenden und dem Finanzvorstand als Grundlage dafür, die erforderliche Zertifizierung der Abschlüsse gegenüber der SEC abzugeben. Entsprechend den Vorgaben des SOA haben wir darüber hinaus Regeln für bilanzbezogene Beschwerden und einen Ethikkodex (»Code of Ethics«) für Finanzangelegenheiten eingeführt; dieser Code of Ethics wurde im Juli 2010 in aktualisierter Form verabschiedet.

## Führungs- und Kontrollstruktur:

### AUFSICHTSRAT

Siemens unterliegt als deutsche Aktiengesellschaft (»AG«) dem deutschen Aktienrecht und verfügt daher über eine zweigeteilte Führungs- und Kontrollstruktur, die von den Mitgliedern des Vorstands und den Mitgliedern des Aufsichtsrats wahrgenommen wird. Der Aufsichtsrat ist gemäß dem deutschen Mitbestimmungsgesetz zu gleichen Teilen mit Vertretern der Anteilseigner und der Arbeitnehmer besetzt. Die Amtsperiode der derzeitigen Aufsichtsratsmitglieder endet mit Ablauf der ordentlichen Hauptversammlung im Jahr 2013.

Der Aufsichtsrat hat in seiner Sitzung am 22. September 2010 mit Blick auf Ziff. 5.4.1 des Kodex nachfolgende Ziele für seine Zusammensetzung beschlossen:

- > Der Aufsichtsrat der Siemens AG soll so besetzt sein, dass eine qualifizierte Kontrolle und Beratung des Vorstands durch den Aufsichtsrat sichergestellt ist. Die zur Wahl in den Aufsichtsrat vorgeschlagenen Kandidatinnen und Kandidaten sollen aufgrund ihrer Kenntnisse, Fähigkeiten und fachlichen Erfahrungen in der Lage sein, die Aufgaben eines Aufsichtsratsmitglieds in einem international tätigen Großunternehmen wahrzunehmen und das Ansehen des Siemens-Konzerns in der Öffentlichkeit zu wahren. Dabei soll insbesondere auf die Persönlichkeit, Integrität, Leistungsbereitschaft, Professionalität und Unabhängigkeit der zur Wahl vorgeschlagenen Personen geachtet werden. Ziel ist es, dass im Aufsichtsrat insgesamt sämtliche Kenntnisse und Erfahrungen vorhanden sind, die angesichts der Aktivitäten von Siemens als wesentlich erachtet werden.
- > Mit Blick auf die internationale Ausrichtung des Unternehmens soll ferner darauf geachtet werden, dass dem Aufsichtsrat eine ausreichende Anzahl an Mitgliedern mit einer langjährigen internationalen Erfahrung angehören. Bei der nächsten Aufsichtsratswahl im Jahr 2013 ist es das Ziel, dass der derzeit bestehende beachtliche Anteil an Aufsichtsratsmitgliedern mit internationalem Hintergrund gewahrt bleibt.
- > Bei den Wahlvorschlägen soll der Aufsichtsrat zudem insbesondere auf eine angemessene Beteiligung von Frauen achten. Bereits bei der Prüfung potenzieller Kandidaten für eine Neuwahl oder Nachbesetzung vakant werdender Aufsichtsratspositionen sollen qualifizierte Frauen in den Auswahlprozess einbezogen und bei den Wahlvorschlägen angemessen berücksichtigt werden. Gegenwärtig sind vier Frauen in unserem Aufsichtsrat. Wir sind bestrebt, diese Anzahl bei der nächsten Aufsichtsratswahl im Jahr 2013

mindestens zu wahren oder wenn möglich zu erhöhen. Zudem ist beabsichtigt, dass im Nachgang zu dieser Aufsichtsratswahl eine Frau Mitglied des Nominierungsausschusses werden soll.

- > Dem Aufsichtsrat soll eine ausreichende Anzahl an unabhängigen Mitgliedern angehören. Wesentliche und nicht nur vorübergehende Interessenkonflikte, zum Beispiel durch Organfunktionen oder Beratungsaufgaben bei wesentlichen Wettbewerbern des Unternehmens, sollen vermieden werden. Zudem sollen die Aufsichtsratsmitglieder für die Wahrnehmung des Mandats ausreichend Zeit haben, sodass sie das Mandat mit der gebotenen Regelmäßigkeit und Sorgfalt wahrnehmen können.
- > Die vom Aufsichtsrat in der Geschäftsordnung niedergelegte Regelung zur Altersgrenze wird berücksichtigt; es sollen nicht mehr als zwei ehemalige Mitglieder des Vorstands der Siemens AG dem Aufsichtsrat angehören.

Nach der Geschäftsordnung des Aufsichtsrats gilt für die Vertreter der Anteilseigner im Aufsichtsrat der Grundsatz der Unabhängigkeit. Einige Mitglieder des Aufsichtsrats sind oder waren im vergangenen Jahr in hochrangiger Position bei anderen Unternehmen, mit denen Siemens in Geschäftsbeziehungen steht, tätig. Geschäfte von Siemens mit diesen Unternehmen erfolgen dabei zu Bedingungen wie unter fremden Dritten. Diese Transaktionen berühren nach unserer Ansicht die Unabhängigkeit der betroffenen Mitglieder des Aufsichtsrats nicht.

Der Aufsichtsrat überwacht und berät den Vorstand bei der Führung der Geschäfte. In regelmäßigen Abständen erörtert der Aufsichtsrat die Geschäftsentwicklung und Planung sowie die Strategie und deren Umsetzung. Er prüft den Jahresabschluss, den Lagebericht und den Vorschlag für die Verwendung des Bilanzgewinns sowie den Konzernabschluss und den Konzernlagebericht. Er behandelt die Quartals- und Halbjahresberichte, stellt die Jahresabschlüsse der Siemens AG fest und billigt die Konzernabschlüsse, jeweils unter Berücksichtigung der Prüfungsberichte des Abschlussprüfers und der Ergebnisse der durch den Prüfungsausschuss vorgenommenen Prüfung. Zu seinen Pflichten gehört es auch, die Einhaltung der Rechtsvorschriften, behördlichen Regelungen und der unternehmensinternen Richtlinien durch das Unternehmen (Compliance) zu überwachen; der Compliance-Ausschuss nimmt die durch Beschluss des Aufsichtsrats sowie die in der Geschäftsordnung des Compliance-Ausschusses festgelegten Compliance-Aufgaben wahr. In den Aufgabenbereich des Aufsichtsrats fällt es weiterhin, die Mitglieder des Vorstands zu

bestellen und ihre Ressorts festzulegen. Wesentliche Vorstandsentscheidungen – zum Beispiel größere Akquisitionen, Desinvestitionen und Finanzmaßnahmen – sind an seine Zustimmung gebunden, soweit sie nicht gemäß der Geschäftsordnung für den Aufsichtsrat stattdessen in die Zuständigkeit des Finanz- und Investitionsausschusses des Aufsichtsrats fallen. In einer Geschäftsordnung für den Vorstand hat der Aufsichtsrat die Arbeit des Vorstands geregelt, insbesondere die Ressortzuständigkeit einzelner Vorstandsmitglieder, ferner die dem Gesamtvorstand vorbehaltenen Angelegenheiten sowie die erforderliche Beschlussmehrheit bei Vorstandsbeschlüssen.

Der Aufsichtsrat verfügt derzeit über sechs Ausschüsse. Ihre Aufgaben, Verantwortlichkeiten und Arbeitsprozesse stimmen mit den Anforderungen des Kodex überein und berücksichtigen die verbindlichen Regelungen des SOA und der NYSE. Darüber hinaus werden auch weitere Regelungen der NYSE berücksichtigt, obwohl diese für uns nicht verbindlich sind. Die jeweiligen Ausschussvorsitzenden berichten regelmäßig an den Aufsichtsrat über die Arbeit der Ausschüsse.

Das **Präsidium** (»Chairman's Committee«) besteht aus dem Vorsitzenden des Aufsichtsrats, den Stellvertretern und einem vom Aufsichtsrat zu wählenden Aufsichtsratsmitglied der Arbeitnehmer. Es hat die Aufgaben eines »Nominating, Compensation and Corporate Governance Committee«, soweit diese Aufgaben nicht durch den Nominierungsausschuss wahrgenommen werden oder das deutsche Recht die Behandlung der Aufgaben durch das Aufsichtsratsplenum vorschreibt. Das Präsidium macht insbesondere Vorschläge für die Bestellung und Abberufung von Vorstandsmitgliedern, behandelt die Vorstandsverträge und bereitet die Festsetzung der Vorstandsvergütung und die Überprüfung des Vergütungssystems für den Vorstand durch das Aufsichtsratsplenum vor. Bei den Vorschlägen für die Berufung von Mitgliedern des Vorstands achtet das Präsidium auf deren fachliche Eignung, internationale Erfahrung und Führungsqualität, die langfristige Nachfolgeplanung sowie auf Vielfalt (Diversity) und insbesondere die angemessene Berücksichtigung von Frauen. Das Präsidium überprüft die Corporate Governance des Unternehmens, unterbreitet Vorschläge zu ihrer Verbesserung an den Aufsichtsrat und bereitet den Beschluss über die Entsprechenserklärung zum Kodex durch den Aufsichtsrat vor. Zudem unterbreitet das Präsidium dem Aufsichtsrat Vorschläge für die Besetzung von Aufsichtsratsausschüssen und entscheidet über die Zustimmung zu Geschäften mit den Vorstandsmitgliedern und den ihnen nahestehenden Personen oder Unternehmen.

Der **Prüfungsausschuss** («Audit Committee») umfasst den Aufsichtsratsvorsitzenden sowie zwei Aufsichtsratsmitglieder der Anteilseigner und drei Aufsichtsratsmitglieder der Arbeitnehmer. Entsprechend dem deutschen Recht muss dem Prüfungsausschuss mindestens ein unabhängiges Mitglied des Aufsichtsrats angehören, das über Sachverstand auf den Gebieten Rechnungslegung oder Abschlussprüfung verfügt. Der Vorsitzende des Prüfungsausschusses, Herr Dr. Hans Michael Gaul, erfüllt diese gesetzlichen Anforderungen. Der Aufsichtsrat hat Dr. Gaul – neben Herrn Dr. Gerhard Cromme – als Finanzexperten im Sinne des Sarbanes-Oxley Act und der SEC-Ausführungsbestimmungen («Audit Committee Financial Expert») benannt. Der Prüfungsausschuss überwacht den Rechnungslegungsprozess. Dem Prüfungsausschuss obliegt, zusätzlich zur Prüfung durch den Abschlussprüfer, die Erörterung der vom Vorstand aufgestellten Quartals-, Halbjahres- und Jahresabschlüsse des Unternehmens. Auf der Grundlage des Berichts des Abschlussprüfers über die Prüfung der Jahresabschlüsse macht der Prüfungsausschuss nach eigener Vorprüfung Vorschläge zur Feststellung der Jahresabschlüsse der Siemens AG und zur Billigung der Konzernabschlüsse durch den Aufsichtsrat. Er befasst sich mit dem Risikoüberwachungssystem des Unternehmens und überwacht die Wirksamkeit seines internen Kontrollsystems, insbesondere bezogen auf die Finanzberichterstattung, des Risikomanagementsystems und des internen Revisionssystems. Die unternehmensinterne Konzernrevision berichtet regelmäßig an den Prüfungsausschuss. Ferner überwacht der Prüfungsausschuss die Abschlussprüfung, insbesondere die Unabhängigkeit und Qualifikation des Abschlussprüfers sowie dessen Leistungen, und erfüllt die anderen Aufgaben gemäß SOA.

Der **Compliance-Ausschuss** («Compliance Committee») besteht aus dem Aufsichtsratsvorsitzenden sowie zwei Aufsichtsratsmitgliedern der Anteilseigner und drei Aufsichtsratsmitgliedern der Arbeitnehmer. Der Ausschuss überwacht die Einhaltung von Rechtsvorschriften, behördlichen Regelungen und der unternehmensinternen Richtlinien durch das Unternehmen (Compliance).

Dem **Nominierungsausschuss** («Nominating Committee») gehören der Aufsichtsratsvorsitzende sowie zwei Vertreter der Anteilseigner an. Der Nominierungsausschuss hat die Aufgabe, den Anteilseignervertretern im Aufsichtsrat Empfehlungen für die Vorschläge zur Wahl von Aufsichtsratsmitgliedern der Anteilseigner durch die Hauptversammlung zu unterbreiten. Dabei hat er nicht nur zu berücksichtigen, dass die vorgeschlagenen Kandidaten über die zur Wahrnehmung ihrer Aufgaben

erforderlichen Kenntnisse, Fähigkeiten und fachlichen Erfahrungen verfügen und unabhängig sein müssen, sondern er hat auch auf Vielfalt (Diversity) und insbesondere auf eine angemessene Beteiligung von Frauen zu achten.

Der **Vermittlungsausschuss** («Mediation Committee»), dem der Vorsitzende des Aufsichtsrats, der nach Maßgabe des Mitbestimmungsgesetzes gewählte Stellvertreter und je ein von den Aufsichtsratsmitgliedern der Arbeitnehmer und von den Aufsichtsratsmitgliedern der Anteilseigner gewähltes Mitglied angehören, unterbreitet dem Aufsichtsrat Vorschläge für die Bestellung oder den Widerruf der Bestellung von Vorstandsmitgliedern, wenn im ersten Wahlgang die erforderliche Mehrheit von zwei Dritteln der Stimmen der Aufsichtsratsmitglieder nicht erreicht wird.

Der **Finanz- und Investitionsausschuss** («Finance and Investment Committee»), dem der Aufsichtsratsvorsitzende sowie drei Aufsichtsratsmitglieder der Anteilseigner und vier Aufsichtsratsmitglieder der Arbeitnehmer angehören, hat die Aufgabe, auf der Grundlage der Gesamtstrategie des Unternehmens, die Gegenstand einer jährlichen Strategiesitzung des Aufsichtsrats ist, die Verhandlungen und Beschlüsse des Aufsichtsrats über die finanzielle Lage und Ausstattung der Gesellschaft sowie über Sach- und Finanzinvestitionen vorzubereiten. Darüber hinaus beschließt der Finanz- und Investitionsausschuss anstelle des Aufsichtsrats über die Zustimmung zu zustimmungspflichtigen Geschäften und Maßnahmen, soweit der Betrag unter 600 Mio. EUR liegt. Der Finanz- und Investitionsausschuss nimmt ferner die Rechte des Aufsichtsrats gemäß § 32 des Mitbestimmungsgesetzes – Beschlussfassung über die Ausübung von Beteiligungsrechten – wahr. Beschlüsse des Finanz- und Investitionsausschusses nach § 32 des Mitbestimmungsgesetzes werden gemäß § 32 Absatz 1 Satz 2 des Mitbestimmungsgesetzes nur mit den Stimmen der Vertreter der Anteilseigner gefasst.

Die personelle Zusammensetzung des Aufsichtsrats und seiner Ausschüsse ist auf den Seiten 282 ff. des Geschäftsberichts dargestellt. Über Einzelheiten der Arbeit des Gremiums informiert der Bericht des Aufsichtsrats auf den Seiten 6 ff. Die Vergütung der Aufsichtsratsmitglieder ist im Vergütungsbericht auf den Seiten 46 ff. ausführlich erläutert.

## VORSTAND

Der Vorstand ist als Leitungsorgan des Konzerns an das Unternehmensinteresse gebunden und der Steigerung des nachhaltigen Unternehmenswerts verpflichtet. Die Mitglieder des Vorstands tragen gemeinsam die Verantwortung für die gesamte Geschäftsführung und entscheiden über Grundsatzfragen der Geschäftspolitik und Unternehmensstrategie sowie über die Jahres- und Mehrjahresplanung.

Der Vorstand ist zuständig für die Aufstellung der Quartals- und Halbjahresabschlüsse des Unternehmens, der Jahresabschlüsse der Siemens AG und der Konzernabschlüsse. Der Vorstand hat ferner für die Einhaltung von Rechtsvorschriften, behördlichen Regelungen und der unternehmensinternen Richtlinien zu sorgen und wirkt auf deren Beachtung durch die Konzernunternehmen hin (Compliance). Weitere ausführliche Informationen zum Compliance-Programm sowie zu diesbezüglichen Maßnahmen im Geschäftsjahr 2010 finden sich auf den Seiten 30 ff. (Compliance-Bericht) und 74 f. Der Vorstand arbeitet eng mit dem Aufsichtsrat zusammen. Er informiert den Aufsichtsrat regelmäßig, zeitnah und umfassend über alle für das Gesamtunternehmen relevanten Fragen der Strategie und Strategieumsetzung, der Planung, der Geschäftsentwicklung, der Finanz- und Ertragslage, der Compliance sowie über unternehmerische Risiken. Bei der Besetzung von Führungsfunktionen im Unternehmen achtet der Vorstand auf Vielfalt (Diversity) und strebt insbesondere eine angemessene Berücksichtigung von Frauen an.

Die Geschäftsordnung des Vorstands sieht für die Behandlung bestimmter Aufgaben die Bildung von Ausschüssen vor. Derzeit gibt es einen Vorstandsausschuss, den Eigenkapital- und Belegschaftsaktienausschuss. Er besteht aus drei Vorstandsmitgliedern und ist zuständig für die Ausnutzung von Genehmigten Kapitalia bei der Ausgabe von Belegschaftsaktien sowie für die Durchführung bestimmter Kapitalmaßnahmen. Außerdem entscheidet er, in welchem Umfang und zu welchen Bedingungen aktienbasierte Vergütungskomponenten beziehungsweise Vergütungsprogramme für Mitarbeiter und Führungskräfte (mit Ausnahme des Vorstands) angeboten werden.

Die personelle Zusammensetzung des Vorstands und seines Ausschusses ist im Geschäftsbericht auf den Seiten 286 ff. dargestellt. Die Vergütung der Vorstandsmitglieder ist im Vergütungsbericht auf den Seiten 36 ff. detailliert dargestellt.

## AKTIENBESITZ

Am 13. Oktober 2010 hielten die derzeitigen Mitglieder des Vorstands insgesamt 252.109 (im Vj. 286.998) Stück Siemens-Aktien und Optionen auf Siemens-Aktien; dies entspricht 0,03% (im Vj. 0,03%) des Grundkapitals der Siemens AG.

Zum selben Tag waren die derzeitigen Mitglieder des Aufsichtsrats im Besitz von 4.713 (im Vj. 3.711) Stück Siemens-Aktien und Optionen auf Siemens-Aktien. Dies entspricht weniger als 0,01% (im Vj. weniger als 0,01%) des Grundkapitals der Siemens AG. In diesen Werten sind 11.459.406 (im Vj. 10.805.913) Stück Aktien beziehungsweise 1,25% (im Vj. 1,18%) des Grundkapitals nicht enthalten, für die die von Siemens-Vermögensverwaltung GmbH (»vSV«) Stimmrechtsvollmacht aufgrund eines zwischen (unter anderem) den Mitgliedern der Siemens-Familie, einschließlich Herrn Gerd von Brandenstein, und der vSV abgeschlossenen Vertrags besitzt. Das Stimmrecht für diese Aktien wird einheitlich durch die vSV entsprechend den Vorschlägen eines aus Repräsentanten der Siemens-Familie bestehenden Gremiums ausgeübt. Vorsitzender des geschäftsführenden Gremiums ist Herr Gerd von Brandenstein, der im Fall von Stimmgleichheit entscheiden kann.

Der Aktienbesitz der einzelnen Mitglieder des Vorstands ist im Vergütungsbericht auf der Seite 43 detailliert dargestellt.

### Erwerb oder Veräußerung von Aktien der Gesellschaft

Mitglieder des Vorstands und des Aufsichtsrats sind nach § 15a Wertpapierhandelsgesetz (WpHG) gesetzlich verpflichtet, den Erwerb oder die Veräußerung von Aktien der Siemens AG oder sich darauf beziehenden Finanzinstrumenten offenzulegen, soweit der Wert der von dem Mitglied und ihm nahestehenden Personen innerhalb eines Kalenderjahrs getätigten Geschäfte die Summe von 5.000 EUR erreicht oder übersteigt. Die der Siemens AG im abgelaufenen Geschäftsjahr gemeldeten Geschäfte wurden ordnungsgemäß veröffentlicht und sind auf der Website des Unternehmens unter [www.siemens.com/directors-dealings](http://www.siemens.com/directors-dealings) abrufbar.

## BEZIEHUNGEN ZU DEN AKTIONÄREN

Siemens berichtet seinen Aktionären vier Mal im Geschäftsjahr über die Geschäftsentwicklung sowie über die Finanz- und Ertragslage. Die jährliche ordentliche Hauptversammlung findet üblicherweise in den ersten vier Monaten des Geschäftsjahrs statt. Durch den Einsatz elektronischer Kommunikationsmittel, insbesondere des Internets, erleichtert der Vorstand den Aktionären die Teilnahme an der Hauptversammlung und



ermöglicht ihnen, sich bei der Ausübung ihres Stimmrechts durch Stimmrechtsvertreter vertreten zu lassen. Der Vorstand kann vorsehen, dass Aktionäre an der Hauptversammlung auch ohne Anwesenheit an deren Ort und ohne einen Bevollmächtigten teilnehmen und sämtliche oder einzelne ihrer Rechte ganz oder teilweise per elektronischer Kommunikation ausüben können. Darüber hinaus kann der Vorstand vorsehen, dass Aktionäre ihre Stimmen, ohne an der Hauptversammlung teilzunehmen, schriftlich oder im Wege elektronischer Kommunikation (Briefwahl) abgeben dürfen. Die vom Gesetz für die Hauptversammlung verlangten Berichte, Unterlagen und Informationen einschließlich des Geschäftsberichts sind im Internet abrufbar, ebenso die Tagesordnung der Hauptversammlung und eventuelle zugänglich zu machende Gegenanträge oder Wahlvorschläge von Aktionären.

Die Hauptversammlung beschließt unter anderem über die Gewinnverwendung, die Entlastung des Vorstands und des Aufsichtsrats sowie die Wahl des Abschlussprüfers. Satzungsänderungen und kapitalverändernde Maßnahmen werden ausschließlich von der Hauptversammlung beschlossen und vom Vorstand umgesetzt. Aktionäre können Gegenanträge zu Beschlussvorschlägen von Vorstand und Aufsichtsrat stellen und Beschlüsse der Hauptversammlung anfechten. Aktionäre mit einem Anteilsbetrag am Grundkapital in Höhe von mindestens 100.000 EUR können darüber hinaus die gerichtliche Bestellung eines Sonderprüfers zur Überprüfung bestimmter Vorgänge verlangen.

Im Rahmen unserer Investor-Relations-Arbeit informieren wir unsere Investoren umfassend über die Entwicklung im Unternehmen. Die Siemens AG nutzt dabei zur Berichterstattung intensiv auch das Internet; unter [www.siemens.com/investoren](http://www.siemens.com/investoren) wird zusätzlich zu den Quartals-, Halbjahres- und Jahresberichten, Ad-hoc-Mitteilungen, Analystenpräsentationen und Pressemitteilungen unter anderem auch der Finanzkalender für das laufende Jahr publiziert, der alle für die Finanzkommunikation wesentlichen Veröffentlichungstermine und den Termin der Hauptversammlung enthält. Einzelheiten zu unserer Investor-Relations-Arbeit sind auf den Seiten 18 ff. des Geschäftsberichts dargestellt.

## CORPORATE GOVERNANCE GUIDELINES

Unsere Satzung, die Geschäftsordnungen des Aufsichtsrats und seiner wichtigsten Ausschüsse, die Geschäftsordnung des Vorstands, sämtliche Entsprechenserklärungen, der Bericht

über die Erfüllung der Bestimmungen des Kodex sowie weitere Unterlagen zur Corporate Governance sind im Internet unter [www.siemens.de/corporate-governance](http://www.siemens.de/corporate-governance) abrufbar.

## WESENTLICHE UNTERSCHIEDE ZWISCHEN DER CORPORATE GOVERNANCE BEI SIEMENS UND DEN NYSE CORPORATE GOVERNANCE STANDARDS

Gesellschaften, die an der NYSE notiert sind, unterliegen den im »NYSE Listed Company Manual« unter Abschnitt 303A geregelten Corporate Governance Standards (»NYSE Standards«). Laut NYSE Standards darf die Siemens AG als »Foreign Private Issuer« von den NYSE Standards abweichen und stattdessen der Corporate-Governance-Praxis ihres Heimatlands folgen. Für sie sind die NYSE Standards lediglich hinsichtlich der Einrichtung eines Prüfungsausschusses (bestehend aus Mitgliedern, die als »unabhängig« im Sinne des SOA anzusehen sind) und bestimmter Bekanntmachungspflichten gegenüber der NYSE verbindlich. Darüber hinaus verlangen die NYSE Standards, dass »Foreign Private Issuer« die wesentlichen Unterschiede zwischen ihren Corporate-Governance-Grundsätzen und den Vorgaben, die gemäß NYSE Standards für US-Gesellschaften gelten, offenlegen.

Als Unternehmen mit Sitz in der Bundesrepublik Deutschland sind für die Siemens AG insbesondere das Aktiengesetz und das Mitbestimmungsgesetz sowie die Empfehlungen des Kodex maßgeblich. Siemens hält zudem die verbindlichen Regelungen der Börsenplätze ein, an denen seine Aktien notiert sind, wie zum Beispiel der NYSE. Siemens erfüllt darüber hinaus freiwillig viele der NYSE-Anforderungen, die nur für US-amerikanische Emittenten gelten.

Unsere Corporate-Governance-Praxis unterscheidet sich insbesondere in folgenden Punkten von den Vorgaben für an der NYSE notierte US-Gesellschaften:

**Duales Führungssystem** Das deutsche Aktiengesetz schreibt für die Siemens AG ein duales Führungssystem (»Two-Tier Board Structure«), bestehend aus einem Vorstand und einem Aufsichtsrat, vor. Im dualen Führungssystem sind Geschäftsleitung und -kontrolle streng getrennt. Aufgaben und Verantwortlichkeiten dieser beiden Organe sind gesetzlich jeweils klar festgelegt. Die Zusammensetzung des Aufsichtsrats richtet sich nach dem Mitbestimmungsgesetz, das vorschreibt, dass die Hälfte der insgesamt 20 Mitglieder des Aufsichtsrats von den Arbeitnehmern in Deutschland gewählt wird. Bei

Stimmengleichheit im Aufsichtsrat stehen dem Vorsitzenden bei einer erneuten Abstimmung, wenn auch diese Stimmengleichheit ergibt, zwei Stimmen zu.

**Unabhängigkeit** Anders als bei den NYSE Standards, die vom »Board of Directors« die positive Feststellung der Unabhängigkeit der einzelnen Board-Mitglieder anhand spezifischer Unabhängigkeitstests verlangen, sieht das deutsche Recht für den Aufsichtsrat keine derartigen positiven Feststellungen zu einzelnen Aufsichtsratsmitgliedern vor. Nach deutschem Recht muss dem Prüfungsausschuss mindestens ein unabhängiges Mitglied des Aufsichtsrats angehören, das über Sachverstand auf den Gebieten Rechnungslegung oder Abschlussprüfung verfügt. Die Geschäftsordnung des Aufsichtsrats der Siemens AG enthält jedoch mehrere Bestimmungen, die dazu beitragen sollen, die Unabhängigkeit der Beratungs- und Überwachungsfunktion des Aufsichtsrats zu gewährleisten. Ferner herrscht eine klare Trennung zwischen den Mitgliedern des Aufsichtsrats und des Vorstands: Eine gleichzeitige Tätigkeit in Aufsichtsrat und Vorstand ist rechtlich unzulässig. Mitglieder des Aufsichtsrats sind in ihren Entscheidungen unabhängig und nicht an Vorgaben oder Weisungen gebunden. Außerdem müssen Beratungs-, Dienstleistungs- und bestimmte andere Verträge zwischen Siemens und einem seiner Aufsichtsratsmitglieder durch den Aufsichtsrat gebilligt werden.

**Ausschüsse** Die NYSE Standards schreiben die Bildung mehrerer spezifischer Board-Ausschüsse vor, die sich aus unabhängigen Board-Mitgliedern zusammensetzen und auf der Grundlage von Geschäftsordnungen arbeiten, in denen die Aufgaben und Verantwortlichkeiten schriftlich festgelegt sind. Abweichend hiervon hat der Aufsichtsrat der Siemens AG die Aufgaben eines »Nominating, Compensation and Corporate Governance Committee« im Wesentlichen in seinem Präsidium zusammengefasst und im Übrigen partiell dem Nominierungsausschuss übertragen. Bestimmte Verantwortlichkeiten werden jedoch nicht an einen Ausschuss delegiert, da sie nach deutschem Recht vom Aufsichtsratsplenum wahrgenommen werden müssen, so beispielsweise die Festsetzung der Vorstandsvergütung. Sowohl der Prüfungsausschuss als auch das Präsidium haben eigene, vom Aufsichtsrat unter Berücksichtigung der NYSE Standards verabschiedete Geschäftsordnungen, in denen ihre Aufgaben und Verantwortlichkeiten niedergelegt sind.

Der Prüfungsausschuss der Siemens AG unterliegt den Vorschriften des SOA und des Securities Exchange Act von 1934, soweit diese auf »Foreign Private Issuer« anwendbar sind, und

erfüllt – im Zusammenwirken mit dem im April 2007 eingerichteten Compliance-Ausschuss – die Funktionen, die denen eines »Audit Committee« gemäß NYSE Standards vergleichbar sind. Nach deutschem Recht dürfen jedoch bestimmte Verantwortlichkeiten nicht an einen Ausschuss delegiert werden, so beispielsweise die Bestimmung des Abschlussprüfers, der nach deutschem Recht von der Hauptversammlung der Aktionäre zu wählen ist.

Der Aufsichtsrat der Siemens AG hat außerdem einen Finanz- und Investitionsausschuss sowie einen Vermittlungsausschuss. Letzterer ist nach deutschem Recht zwingend zu bilden, während keiner dieser beiden Ausschüsse gemäß NYSE Standards erforderlich wäre.

**Zustimmung der Aktionäre zu aktienbasierten Vergütungsplänen; Erwerb eigener Aktien** Die NYSE Standards verlangen von den an der NYSE notierten US-Gesellschaften, dass die Aktionäre grundsätzlich über alle aktienbasierten Vergütungspläne (einschließlich Aktienoptionspläne) und deren wesentlichen Änderungen abstimmen. Nach deutschem Recht müssen unsere Aktionäre zur Ausgabe von Aktien und Aktienoptionen den zugrunde liegenden genehmigten oder bedingten Kapitalia zustimmen. Hierzu gehört die Zustimmung der Aktionäre zu den wesentlichen Eckpunkten eines Aktienoptionsplans im Rahmen der Beschlussfassung über die Schaffung eines bedingten Kapitals oder des Rückerwerbs und der Verwendung eigener Aktien zur Bedienung des Aktienoptionsplans.

Der geplante Erwerb eigener Aktien bedarf nach deutschem Recht grundsätzlich der vorherigen Zustimmung der Aktionäre. Eine solche Ermächtigung wurde zuletzt von der Hauptversammlung am 26. Januar 2010 ausgesprochen und wird in der Regel nach Auslaufen der jeweiligen Ermächtigung der Hauptversammlung zur Beschlussfassung vorgelegt.

# Erklärung zur Unternehmensführung nach § 289a HGB

Die Erklärung zur Unternehmensführung nach § 289a HGB ist Bestandteil des zusammengefassten Lageberichts. Gemäß § 317 Abs. 2 Satz 3 HGB sind die Angaben nach § 289a HGB nicht in die Prüfung einzubeziehen.

## Entsprechenserklärung zum Deutschen Corporate Governance Kodex

Vorstand und Aufsichtsrat der Siemens AG haben in ihren Sitzungen am 15. und 22. September 2010 die folgende Erklärung gemäß § 161 AktG beschlossen:

»Entsprechenserklärung des Vorstands und des Aufsichtsrats der Siemens Aktiengesellschaft zum Deutschen Corporate Governance Kodex

Die Siemens AG entspricht sämtlichen vom Bundesministerium der Justiz im Amtlichen Teil des elektronischen Bundesanzeigers veröffentlichten Empfehlungen des Deutschen Corporate Governance Kodex (»Kodex«) in der Fassung vom 26. Mai 2010 und wird ihnen auch zukünftig entsprechen. Seit Abgabe der letzten Entsprechenserklärung vom 1. Oktober 2009 hat die Siemens AG sämtlichen Empfehlungen des Kodex in der Fassung vom 18. Juni 2009 entsprochen.

Berlin und München, 1. Oktober 2010

Siemens Aktiengesellschaft

Der Vorstand      Der Aufsichtsrat«

## Angaben zu Unternehmensführungspraktiken

### ANREGUNGEN DES KODEX

Die im Kodex zusätzlich genannten nicht obligatorischen Anregungen haben wir erfüllt.

Der Kodex kann unter [www.siemens.com/289a](http://www.siemens.com/289a) heruntergeladen werden.

Weitere Unternehmensführungspraktiken, die über die gesetzlichen Anforderungen hinaus angewandt werden, sind in unseren sogenannten Business Conduct Guidelines enthalten.

### UNTERNEHMENSWERTE UND BUSINESS CONDUCT GUIDELINES

Basis unseres gesamten unternehmerischen Handelns sind unsere Unternehmenswerte »Verantwortungsvoll – Exzellent – Innovativ«. Sie bilden auch die Grundlage für unsere Business Conduct Guidelines, die den ethisch-rechtlichen Rahmen unserer Unternehmenstätigkeit abstecken und unseren Mitarbeiterinnen und Mitarbeitern als Leitplanken für ihr Handeln dienen. Sie enthalten die grundlegenden Prinzipien für unser Verhalten innerhalb des Unternehmens und gegenüber unseren externen Partnern sowie der Öffentlichkeit. Die Business Conduct Guidelines verpflichten alle unsere Mitarbeiter und Mitarbeiterinnen zur Befolgung der gesetzlichen Vorschriften und darüber hinausgehender Siemens-interner Richtlinien. Die Business Conduct Guidelines können im Internet unter [www.siemens.com/289a](http://www.siemens.com/289a) heruntergeladen werden.

## Beschreibung der Arbeitsweise von Vorstand und Aufsichtsrat sowie der Zusammensetzung und Arbeitsweise ihrer Ausschüsse

Die Zusammensetzung der Ausschüsse von Vorstand und Aufsichtsrat ist im Geschäftsbericht auf den Seiten 284 f. und 288 zu finden. Dort wird auch über die Zusammensetzung von Vorstand und Aufsichtsrat berichtet. Die Zusammensetzung ist im Internet unter folgendem Link zugänglich: [www.siemens.com/289a](http://www.siemens.com/289a).

Eine allgemeine Beschreibung der Aufgaben und Arbeitsweise von Vorstand und Aufsichtsrat findet sich unter der Überschrift »Führungs- und Kontrollstruktur« im Corporate-Governance-Bericht auf den Seiten 23 ff. und unter folgendem Link im Internet: [www.siemens.com/289a](http://www.siemens.com/289a). Weitere Einzelheiten zur Arbeitsweise von Vorstand und Aufsichtsrat ergeben sich aus den Angaben zu den Ausschüssen sowie den Geschäftsordnungen der jeweiligen Gremien. Diese Dokumente sind unter [www.siemens.com/289a](http://www.siemens.com/289a) veröffentlicht.

Compliance beschreibt die Art, wie wir Geschäfte machen, entscheiden und handeln und dadurch Integrität bei Siemens verwirklichen. Die Bekämpfung der Korruption in all ihren Erscheinungsformen stellt ein zentrales Element unseres Integritätsverständnisses dar. Das Einhalten von Recht und Gesetz und unseren eigenen Regelungen ist das Fundament jeglicher Geschäftstätigkeit.

Mit Pionierleistungen auf zahlreichen Gebieten trägt Siemens seit seiner Gründung wesentlich zum technischen Fortschritt bei – ein Anspruch, der auch im Mittelpunkt unserer Unternehmensvision steht. Mit dem Pionierbegriff eng verknüpft ist unser Streben nach Innovationen, also nach neuen, besseren technischen Produkten und Lösungen, die sich am Markt behaupten und neue Standards setzen. Innovativ zu sein lautet daher auch einer unserer drei Unternehmenswerte.

Innovativ zu sein, sich stets auf diese Stärke zu besinnen und zu konzentrieren – diese Haltung wird unterlaufen durch eine Praxis, im Wettbewerb nicht mehr mit der besseren technischen Lösung oder dem besseren Produkt bestehen zu wollen, sondern Geschäftspartner unredlich zu beeinflussen, etwa durch Korruption. Mit Korruption untergraben Unternehmen ihre Integrität, und sie schwächen ihre Wettbewerbsfähigkeit an einer entscheidenden Stelle. Konsequenter Korruption innerhalb unseres Unternehmens vorzubeugen schärft daher den Fokus auf unsere Kernkompetenzen und unsere Wettbewerbsfähigkeit – indem wir uns auf das konzentrieren, was unser Unternehmen seit über 160 Jahren erfolgreich gemacht hat: mit innovativen Produkten und Lösungen Antworten auf die drängenden Herausforderungen der Zeit zu geben.

In diesem Sinne ist Compliance weit mehr als ein grundsätzliches Bekenntnis zu integrem Handeln und die Basis für eine erfolgreiche Geschäftstätigkeit. Unser umfassendes Compliance-Programm leistet einen wesentlichen Beitrag dazu, der Korruption vorzubeugen.

## KORRUPTIONSBEKÄMPFUNG UND NACHHALTIGE ENTWICKLUNG

Mit unseren Geschäftsaktivitäten erzeugen wir Mehrwert für unser Unternehmen und unsere Stakeholder. Gleichzeitig leisten wir einen wichtigen Beitrag für die nachhaltige Entwicklung derjenigen Gesellschaften, in denen wir als Teil der jeweiligen Volkswirtschaften wahrgenommen werden. Das heißt: Wir stärken unsere Märkte und profitieren über die direkten Erträge unserer Geschäftstätigkeit hinaus vom gesellschaftlichen Mehrwert, den wir als Unternehmen schaffen.

Mit Pionierleistungen wirtschaftlich erfolgreich sein: Das erfordert funktionierende Märkte und zugleich Gesellschaften, die sich selbst ebenfalls prosperierend entwickeln. Für beides stellt Korruption eines der wesentlichen Hindernisse dar. Auch für die internationale Entwicklungszusammenarbeit wird die Bekämpfung der Korruption inzwischen als wesentliche Herausforderung verstanden.

Den höchsten Preis für Korruption zahlen die Menschen am unteren Ende der Wohlstandspyramide: Korruption untergräbt ihre (Überlebens-)Chancen. Und sie untergräbt das Funktionieren von Politik, Verwaltung und Rechtsprechung, die den notwendigen Rahmen für das wirtschaftliche Leben setzen müssen. Die Folge: Menschen und Unternehmen verlieren das Vertrauen in diese Institutionen; diese Entwicklung kann bis hin zum Zusammenbruch der Märkte und zum Kollaps von Staaten führen. Selbst wenn es nicht so weit kommt: Unter diesen Umständen lässt sich ein Großteil des vorhandenen Marktpotenzials nicht realisieren.

Ein Akteur allein kann im Kampf gegen Korruption nur begrenzte Wirkung erzielen. Um substanzielle Fortschritte zu erreichen, bedarf es des gemeinsamen Handelns aller oder zumindest möglichst vieler Marktteilnehmer und Stakeholder. Daher engagiert sich Siemens mit Collective Action über die Grenzen des eigenen Unternehmens hinaus für den Kampf gegen Korruption.

## FÜR INTEGRITÄT EINSTEHEN

Unsere Entscheidungen und unser Verhalten müssen stets moralischen Grundsätzen und unseren Unternehmenswerten entsprechen. Das verstehen wir unter Integrität. An diesem Anspruch messen wir uns, und an diesem Anspruch wollen wir von unseren Stakeholdern gemessen werden. Compliance, also die Beachtung der Gesetze überall dort, wo wir geschäftlich tätig sind, und unserer eigenen Regelungen, vor allem der Siemens Business Conduct Guidelines, ist ein wesentliches Element von Integrität und unverrückbarer Bestandteil unseres Geschäfts. Der Prävention von Korruption und Wettbewerbsverstößen sowie der Aufklärung und Ahndung von Fehlverhalten kommt in diesem Zusammenhang eine Schlüssel- und eine Vorreiterrolle zu. Mit unserem Compliance-Programm verankern wir dieses Bewusstsein dauerhaft bei allen Führungskräften und Mitarbeitern im Unternehmen.

Siemens bekennt sich umfassend und ausdrücklich zur Einhaltung von Recht und Gesetz. Dies umfasst auch die Gesetze zur Bekämpfung der Korruption. Die Business Conduct Guidelines, Herzstück unseres Compliance-Programms, legen unmissverständlich fest, dass es bei Siemens keinerlei Toleranz für Korruption gibt. Zusätzlich zu den Prinzipien des Global Compact der Vereinten Nationen stellt die Anti-Korruptions-Konvention der Vereinten Nationen eine wichtige Leitlinie für unser Unternehmen dar, deren Ratifizierung und Umsetzung von Siemens unterstützt wird.

Die Siemens-Compliance-Organisation treibt unternehmensweit die Compliance auf den Gebieten Anti-Korruption und Anti-Trust voran. Konkret heißt das: vorbeugen, festgestellte Verstöße aufklären und mit Entschiedenheit darauf reagieren. Zugleich unterstützt sie andere Unternehmensfunktionen bei vorsätzlichen Verstößen auf anderen Gebieten: Intern ermitteln, disziplinarisch ahnden und die Behebung festgestellter Schwachstellen koordinieren, so lauten ihre Aufgaben. Im Berichtszeitraum haben wir der Compliance-Organisation eine geänderte Führungsstruktur gegeben: Der Chief Compliance

Officer wird künftig für alle operativen, vertrieblichen Themen verantwortlich sein, während die neu geschaffene Position des Chief Counsel Compliance alle rechtlichen Aspekte von Compliance verantwortet. Zum 1. Juli 2010 hat das Unternehmen Josef Winter zum Chief Compliance Officer und Dr. Klaus Moosmayer zum Chief Counsel Compliance ernannt.

Das Compliance-Programm von Siemens muss sich stets fortentwickeln, um auf identifizierte Verbesserungsmöglichkeiten und sich wandelnde Anforderungen aus unserem weltweiten Geschäft reagieren zu können. Es unterliegt fortlaufender Veränderung und Verbesserung und wird daher nie »endgültig« fertiggestellt sein. Letztlich geht es um einen umfassenden, langfristig angelegten Change-Management-Prozess. Compliance bleibt auf Dauer eine zentrale Aufgabe für unser Unternehmen. Im Kontext unseres strategischen Rahmens hat das Compliance-Management als Compliance-Prioritäten mittelfristig folgende Schwerpunkte für die Weiterentwicklung der Anti-Korruptions- und Anti-Trust-Aktivitäten im Unternehmen definiert:

- > Wir wollen die eingeführten und bewährten Compliance-Prozesse und -Werkzeuge in ihrer Effektivität und Effizienz bestmöglich ausrichten.
- > Mit unseren Compliance-Risiko-Analysen wollen wir noch besser die spezifische Situation unserer jeweiligen Geschäfte berücksichtigen.
- > Compliance soll noch stärker als Aufgabe unserer Geschäfte im Unternehmen verankert werden.
- > Unter dem Stichpunkt »Reputation der Siemens-Compliance« wollen wir das Stakeholder-Engagement vor allem zur Korruptionsbekämpfung weiter verstärken – hierzu tragen insbesondere unser Engagement im Rahmen von Collective Action und die Siemens-Integritätsinitiative bei.



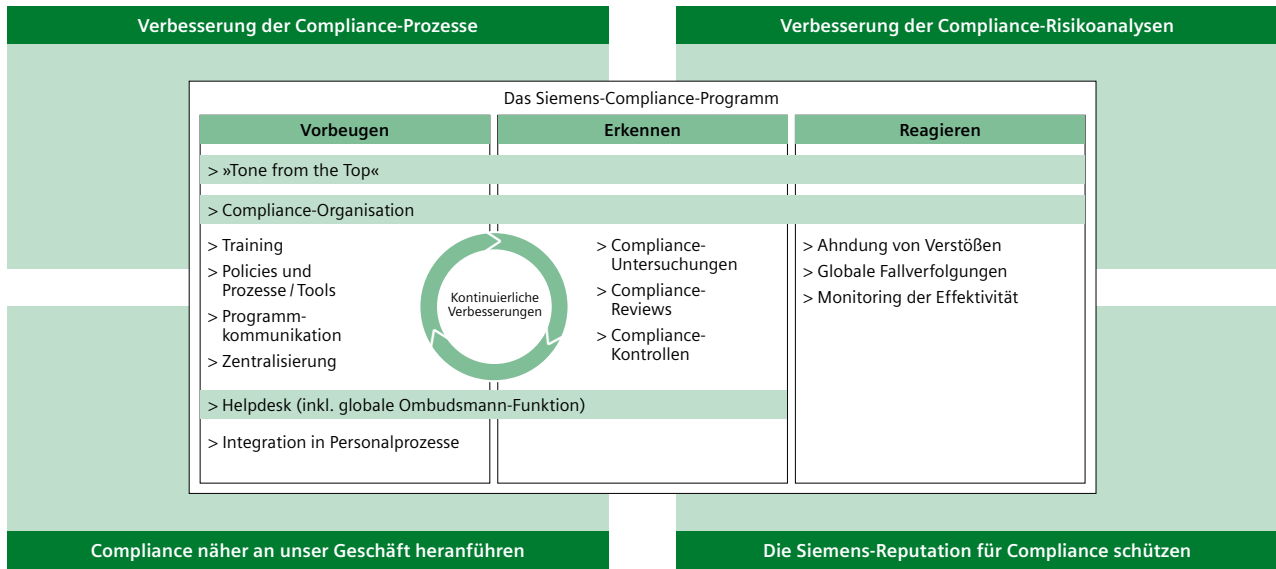

## COLLECTIVE ACTION UND SIEMENS-INTEGRITÄTSINITIATIVE

Siemens engagiert sich seit mehreren Jahren an zahlreichen Märkten für den Schulterschluss zwischen Unternehmen und Institutionen mit dem Ziel, saubere Geschäfte sicherzustellen – gemeinsam handeln (*Collective Action*) lautet das Stichwort. Über die Mitgliedschaften etwa im International Business Leaders Forum (IBLF) oder in der Anti-Korruptions-Initiative des World Economic Forum verstärken wir dieses Engagement. In der Arbeitsgruppe des Global Compact der Vereinten Nationen zur Korruptionsbekämpfung arbeitet Siemens seit drei Jahren mit; zuletzt waren wir an der Erarbeitung der Leitfäden des Global Compact zur Anti-Korruptions-Berichterstattung (gemeinsam mit Transparency International) sowie zur Korruptionsbekämpfung in der Lieferkette beteiligt.

Die Bekämpfung der Korruption ist eine komplexe Herausforderung. Deshalb müssen die auf Korruptionsbekämpfung ausgerichteten Maßnahmen im Rahmen von *Collective Action*

auf unterschiedlichen Ebenen ansetzen und einen kaskadierenden Ansatz verfolgen: Grundlage und unerlässliche Voraussetzung sind dabei die Stärkung der Rechtssysteme und die Geltung der staatlichen Rechtsordnungen. Konkrete Integritätspakete und verbindliche Verhaltenskodizes erfordern in der Regel intensive Vorarbeiten durch entsprechende Trainings- und Schulungsaktivitäten sowie die Etablierung von Dialogplattformen und das Engagement von Unternehmensverbänden und -vereinigungen.

Ein Meilenstein unserer *Collective-Action*-Maßnahmen ist die Gründung der »Corporate Ethics Initiative« zur Förderung ethisch einwandfreier und sauberer Geschäfte in Russland im April 2010. Als Mitglied des IBLF unterstützt Siemens seit seinem Beitritt im Jahr 2009 dessen Bemühungen, gemeinsam mit anderen Unternehmen und Institutionen die Corporate Ethics Initiative in Russland ins Leben zu rufen. Siemens gehört zu den 46 Gründungsmitgliedern der Vereinigung, von denen die Mehrzahl multinationale Unternehmen mit Hauptsitz in Deutschland sind.

Siemens hat die weltweite Siemens-Integritäts-Initiative (Integrity Initiative) mit einem Budget von 100 Millionen US-Dollar gestartet. Die Initiative ist Teil der Einigung zwischen der Weltbank und Siemens vom Juli 2009. Sie unterstützt Organisationen und Projekte, die mit Collective Action – also dem Schulterschluss von Unternehmen und Institutionen – sowie Aus- und Weiterbildung gegen Korruption und Betrug kämpfen und sich damit für saubere Märkte und fairen Wettbewerb einsetzen. Wir vergeben unsere Fördermittel über einen Zeitraum von 15 Jahren in drei Auswahlrunden. Die erste Auswahlrunde mit einem geplanten Fördervolumen von rund 40 Millionen US-Dollar begann am 9. Dezember 2009, dem internationalen Anti-Korruptions-Tag.

Rund 300 Bewerbungen aus 66 Ländern für die beiden Schwerpunkte »Collective Action« (63 %) sowie »Bildung und Training« (37 %) sprechen für sich. Und: Die Bewerbungen von lokalen Collective-Action-Initiativen in spezifischen Branchen reichten bis hin zu Multi-Stakeholder-Initiativen. Ihnen allen gemeinsam ist das Anliegen, die Bedeutung des Rechts und freiwilliger Verhaltenskodizes zu stärken und dafür zu sorgen, dass sie auch eingehalten werden.

Eine Auswahl von Bewerbern wurde eingeladen, einen ausführlichen Projektvorschlag mit Angaben zu konkreten Aktivitäten, Budgets und Zeitplänen zu unterbreiten. Diese Detailbewerbungen mussten bis zum 25. Juni 2010 eingereicht sein.

Bis zu diesem Termin gingen 39 Detailbewerbungen ein: 74 % zum Schwerpunkt »Collective Action«, die übrigen 26 % zu »Aus- und Weiterbildung«.

Alle Bewerbungen wurden nach strengen Kriterien geprüft – global wie auch auf Landesebene. Sie finden eine ausführliche Beschreibung dieser Kriterien auf unserer Unternehmens-Website unter [www.siemens.com/integritytaets-initiative](http://www.siemens.com/integritytaets-initiative). Das Ergebnis: Ungefähr 30 Vorschläge wurden zur nächsten Phase zugelassen.

Wir beabsichtigen, sobald die Förderverträge unterzeichnet sind, unsere »Integritätspartner« auf der genannten Website zu veröffentlichen.

Weiterführende Informationen zu unseren Compliance-Aktivitäten finden Sie auf den Seiten 74f. des Zusammengefassten Lageberichts sowie im Internet unter:

[www.siemens.com/compliance](http://www.siemens.com/compliance)

[www.siemens.com/collective-action](http://www.siemens.com/collective-action)

[www.siemens.com/integritytaets-initiative](http://www.siemens.com/integritytaets-initiative)

Über Rechtsstreitigkeiten im abgelaufenen Geschäftsjahr informiert Sie der Anhang zum Konzernabschluss auf den Seiten 228 bis 237.

Der Vergütungsbericht fasst die Grundsätze zusammen, die auf die Festsetzung der Gesamtvergütung der Mitglieder des Vorstands der Siemens AG Anwendung finden, und erläutert die Struktur sowie die Höhe der Vergütung der Vorstandsmitglieder. Ferner werden die Grundsätze und die Höhe der Vergütung der Mitglieder des Aufsichtsrats beschrieben.

Der Bericht richtet sich nach den Empfehlungen des Deutschen Corporate Governance Kodex und enthält Angaben nach den Erfordernissen des deutschen Handelsgesetzbuchs (HGB) sowie der International Financial Reporting Standards (IFRS). Der Vergütungsbericht ist Bestandteil des »Anhangs zum Konzernabschluss«.

## 1. VERGÜTUNGSSYSTEM FÜR DIE MITGLIEDER DES VORSTANDS IM GESCHÄFTSJAHR 2010

Das System der Vorstandsvergütung bei Siemens ist darauf ausgerichtet, einen Anreiz für eine langfristige, auf Nachhaltigkeit angelegte Unternehmensführung zu setzen. Die Vorstandsmitglieder werden angehalten, sich langfristig im und für das Unternehmen zu engagieren, und können an einer nachhaltigen Wertsteigerung des Unternehmens partizipieren. Ziel ist es ferner, dass die Vergütung der Größe und wirtschaftlichen Lage des Unternehmens Rechnung trägt. Besondere Leistungen sollen angemessen honoriert werden, Zielverfehlungen sollen zu einer spürbaren Verringerung der Vergütung führen. Schließlich soll die Vergütung auch im Vergleich zum Wettbewerb attraktiv sein, um herausragende Manager für unser Unternehmen zu gewinnen und auf Dauer zu halten.

Systematik und Höhe der Vorstandsvergütung werden auf Vorschlag des Präsidiums des Aufsichtsrats durch das Aufsichtsratsplenum festgelegt und regelmäßig überprüft. Vorstand und Aufsichtsrat haben im Herbst 2009 zudem beschlossen, der Hauptversammlung das Vorstandsvergütungssystem zur Abstimmung vorzulegen. Das damals bestehende Vergütungssystem wurde von der ordentlichen Hauptversammlung am 26. Januar 2010 mit großer Mehrheit gebilligt.

Das angepasste Vergütungssystem für die Mitglieder des Vorstands, das unter Ziffer 4 (Seiten 44 ff.) dieses Berichts näher erläutert wird, gilt seit dem 1. Oktober 2010 und wird der Hauptversammlung der Gesellschaft im Januar 2011 zur Billigung vorgelegt werden.

Im Geschäftsjahr 2010 setzte sich das Vergütungssystem für den Vorstand aus folgenden Komponenten zusammen:

**Grundvergütung.** Die Grundvergütung wird monatlich als Gehalt ausbezahlt. Die Grundvergütung des Vorsitzenden des Vorstands, Peter Löscher, wurde bei seiner Bestellung zum 1. Juli 2007 festgelegt und blieb seither unverändert. Die Grundvergütung der weiteren Mitglieder des Vorstands entsprach im Geschäftsjahr 2010 in etwa dem Niveau von 2003.

**Variable Vergütung (Bonus).** Die variable Barvergütung richtet sich nach dem geschäftlichen Erfolg des Unternehmens im abgelaufenen Geschäftsjahr. Bezogen auf eine Zielerreichung von 100 % (Zielbetrag) entspricht die Höhe des Bonus jener der Grundvergütung. Auf der Grundlage der langfristigen strategischen Ausrichtung und unter Verwendung der Zielparame-ter Kapitalrendite (*Return on Capital Employed, ROCE*), freier Zahlungsmittelzufluss (*Free Cash Flow*) und organisches Umsatzwachstum auf Konzernebene werden zu Beginn des Geschäftsjahrs vom Aufsichtsrat eindeutig bestimmte Ziele definiert. Die Zielparame-ter finden, zusätzlich zu anderen, auch bei den Leitenden Angestellten Anwendung, um insoweit die Einheitlichkeit und Durchgängigkeit des Zielsystems im gesamten Unternehmen zu gewährleisten. Die Gewichtung der Zielparame-ter untereinander legt der Aufsichtsrat jährlich neu fest.

Der Bonus wird durch einen Maximalbetrag (*Cap*) begrenzt, der für das Geschäftsjahr 2010 bei 250 % des Zielbetrags lag. Bei Zielverfehlungen kann die variable Vergütung vollständig entfallen.

Der Aufsichtsrat kann den sich aus der Zielerreichung ergebenden Betrag nach pflichtgemäßem Ermessen um bis zu 20 % nach unten oder oben anpassen. Bei der Entscheidung über eine solche Anpassung kann der Aufsichtsrat die Erreichung weiterer Ziele, die er zu Beginn des Geschäftsjahrs festlegt, berücksichtigen.

**Langfristige aktienbasierte Vergütung.** Seit dem Jahr 2006 werden als langfristige aktienbasierte Vergütung verfallbare Aktienzusagen (*Stock Awards*) gewährt. Dem Berechtigten eines *Stock Awards* wird nach Ablauf einer Sperrfrist ohne eigene Zuzahlung eine Siemens-Aktie übertragen. Die Sperrfrist für *Stock Awards* endet mit Ablauf des zweiten Tags nach der Veröffentlichung der Geschäftsergebnisse im dritten Kalenderjahr nach der Zusage.

Für das Geschäftsjahr 2010 hat der Aufsichtsrat entschieden, bei seiner Ermessensentscheidung über die Gewährung von Stock Awards das durchschnittliche Ergebnis je Aktie (unverwässert) der vergangenen drei Geschäftsjahre zu berücksichtigen. In Anknüpfung an die Vorjahreswerte wurde der Zielbetrag für den Geldwert der Stock-Awards-Zusage bei 100 % Zielerreichung für den Vorstandsvorsitzenden bei 2,5 Mio. EUR und für die übrigen Vorstandsmitglieder bei 1 Mio. EUR festgelegt. Diese Werte sollten für das Geschäftsjahr 2010 um nicht mehr als 20 % über- beziehungsweise unterschritten werden (*Cap*).

Hinsichtlich der weiteren Ausgestaltung der Stock Awards gelten für den Vorstand im Übrigen die gleichen Rahmenbedingungen wie für die Leitenden Angestellten, die in »Ziffer 34« des Anhangs zum Konzernabschluss näher erläutert werden.

**Share Ownership Guidelines.** Seit 2008 wird das Vergütungssystem bei Siemens wesentlich durch die unternehmensweit geltenden Siemens Share Ownership Guidelines geprägt. Diese verpflichten die Mitglieder des Vorstands, für die Dauer ihrer Zugehörigkeit zum Vorstand ein Vielfaches ihrer Grundvergütung (für den Vorstandsvorsitzenden 300 %, für die übrigen Mitglieder des Vorstands 200 %) in Siemens-Aktien zu halten. Der Nachweis über die Erfüllung dieser Verpflichtung ist erstmals im März 2012 zu erbringen und jährlich zu erneuern. Bei Mitgliedern des Vorstands, die nach dem 1. Oktober 2008 bestellt wurden, gilt eine vierjährige Aufbaufrist. Sinkt der Wert des aufgebauten Aktienbestands infolge von Kursverlusten der Siemens-Aktie unter den jeweils nachzuweisenden Betrag, ist das Vorstandsmitglied zum Nacherwerb verpflichtet. Zum Ende des Kalenderjahrs wird vom Unternehmen die zur Erfüllung der Haltepflicht erforderliche Anzahl von Aktien ermittelt und dem einzelnen Vorstandsmitglied mitgeteilt. Das einzelne Vorstandsmitglied hat dann bis zum zweiten Freitag im März des Folgejahrs Zeit, eine etwaige Unterdeckung auszugleichen. Die Vorstandsmitglieder sind somit gehalten, während ihrer Zugehörigkeit zum Vorstand einen erheblichen Teil ihres Vermögens in Siemens-Aktien zu investieren.

**Share Matching Plan.** Unter dem Share Matching Plan konnten die Vorstandsmitglieder im Geschäftsjahr 2010 bis zu 50 % des Bruttobetrag ihrer variablen Barvergütung (Bonus) in Siemens-Aktien investieren; sie erhalten wie die übrigen Plan Teilnehmer nach Ablauf einer rund dreijährigen Haltefrist für je drei unter dem Plan erworbene und durchgängig gehaltene Aktien jeweils einmalig eine Siemens-Aktie ohne Zuzahlung (Matching-Aktie).

**Versorgungszusagen.** Seit dem Geschäftsjahr 2005 sind die Mitglieder des Vorstands in die Beitragsorientierte Siemens Altersversorgung (BSAV) eingebunden, deren Rahmenbedingungen für alle Mitarbeiter der Siemens AG in Deutschland einheitlich gelten. Die vorherige Versorgungsordnung wurde im Oktober 2004 in die BSAV integriert. Im Rahmen der BSAV erhalten die Mitglieder des Vorstands Beiträge, die ihrem Versorgungskonto gutgeschrieben werden. Die Höhe der jährlichen Beiträge resultiert aus einem festgelegten Prozentsatz, bezogen auf Grundvergütung und Zielbetrag des Bonus. Dieser Prozentsatz wurde vom Präsidium des Aufsichtsrats bei Einführung des Systems zum Oktober 2004 mit 28 % festgelegt und seitdem jährlich so entschieden. Aufgrund von Einzelentscheidungen des Aufsichtsrats können Vorstandsmitgliedern auch Sonderbeiträge gewährt werden. Soweit ein Mitglied des Vorstands vor Einführung der BSAV einen Pensionsanspruch gegenüber dem Unternehmen erworben hatte, entfällt ein Teil seiner Beiträge auf die Finanzierung dieses Altanspruchs.

**Ausgleichszahlungen.** Ab Juni 2007 abgeschlossene Vorstandsverträge sehen für den Fall der vorzeitigen einvernehmlichen Beendigung der Vorstandstätigkeit ohne wichtigen Grund eine Ausgleichszahlung vor, deren Höhe auf maximal zwei Jahresvergütungen begrenzt ist (*Cap*). Dies gilt nicht, wenn die einvernehmliche Beendigung auf Wunsch des Vorstandsmitglieds erfolgt oder ein wichtiger Grund zur Kündigung des Anstellungsverhältnisses durch die Gesellschaft besteht.

Im Fall eines »Change of Control« – das heißt, wenn ein oder mehrere gemeinsam handelnde Aktionäre die Stimmrechtsmehrheit an der Siemens AG erwerben und einen beherrschenden Einfluss ausüben, die Siemens AG durch Abschluss eines Unternehmensvertrags im Sinne des § 291 AktG zu einem abhängigen Unternehmen wird oder bei Verschmelzung der Siemens AG auf ein anderes Unternehmen – hat jedes einzelne Mitglied des Vorstands das Recht zur Kündigung des Anstellungsvertrags, wenn sich durch den »Change of Control« eine wesentliche Änderung seiner Stellung ergibt (zum Beispiel durch Änderung der Strategie des Unternehmens oder durch Änderung des Tätigkeitsbereichs des Vorstandsmitglieds). Bei Ausübung dieses Kündigungsrechts hat das Mitglied des Vorstands einen Abfindungsanspruch in Höhe der für das letzte vor Vertragsbeendigung abgelaufene Geschäftsjahr geltenden Grundvergütung und des Zielbetrags des Bonus für die restliche Vertragslaufzeit. Vor Juni 2008 abgeschlossene Vorstandsverträge sahen eine Abfindung für die Restlaufzeit des Vertrags von mindestens drei Jahresvergütungen vor; ab

Juni 2008 abgeschlossene Vorstandsverträge begrenzen diesen Abfindungsanspruch auf maximal drei Jahresvergütungen. Zusätzlich werden Sachbezüge durch die Zahlung eines Betrags in Höhe von 5 % der Abfindungssumme abgegolten. Die in der Vergangenheit zugesagten aktienbasierten Vergütungsbestandteile bleiben unberührt. Kein Abfindungsanspruch besteht, wenn das Vorstandsmitglied in Zusammenhang mit dem »Change of Control« Leistungen von Dritten erhält. Ein Recht zur Kündigung besteht ferner nicht, wenn der »Change of Control« innerhalb von zwölf Monaten vor Übertritt des Vorstandsmitglieds in den Ruhestand eintritt.

## 2. VERGÜTUNG DER MITGLIEDER DES VORSTANDS FÜR DAS GESCHÄFTSJAHR 2010

Der Aufsichtsrat hat einen unabhängigen externen Vergütungsberater damit beauftragt, die Angemessenheit und Höhe der Vergütung des Vorstands für das Geschäftsjahr 2010 zu prüfen. Der unabhängige Vergütungsberater hat bestätigt, dass die sich aus der Zielerreichung für das Geschäftsjahr 2010 ergebende Vorstandsvergütung angemessen ist. Unter Berücksichtigung dieser gutachterlichen Prüfung und nach Prüfung der Erreichung der zu Beginn des Geschäftsjahrs festgelegten Ziele hat der Aufsichtsrat in seiner Sitzung am 10. November 2010 auf Grundlage des für das Geschäftsjahr 2010 geltenden Vergütungssystems die Höhe der variablen Barvergütung, der zu gewährenden Aktienzusagen sowie der Beiträge zur Altersversorgung wie folgt festgelegt:

**Variable Barvergütung (Bonus).** Bei der Zielsetzung für die variable Barvergütung (Bonus) hat der Aufsichtsrat zu Beginn des Geschäftsjahrs 2010 berücksichtigt, dass die Geschäfte des Unternehmens durch Nachwirkungen der weltweiten Wirtschafts- und Finanzkrise beeinträchtigt werden:

- > Der Aufsichtsrat hat angesichts der zu Beginn des Geschäftsjahrs bestehenden Unsicherheit auf den Finanzmärkten der Sicherstellung einer ausreichenden Liquidität eine hervor gehobene Bedeutung beigemessen und dies bei der Gewichtung der Zielparameter berücksichtigt.
- > Ausgehend von einem berichteten ROCE-Wert von 6,1% im Geschäftsjahr 2009, hat der Aufsichtsrat bei der Bestimmung der Zielvorgabe für den ROCE-Wert für das Geschäftsjahr 2010 berücksichtigt, dass das Unternehmen infolge der Wirtschafts- und Finanzkrise einen Rückgang des organischen Umsatzes erwartete.
- > Im Geschäftsjahr 2009 war es Siemens gelungen, ungeachtet der Wirtschafts- und Finanzkrise, seinen Umsatz auf Vorjahresniveau stabil zu halten. Allerdings verzeichnete das Unternehmen konjunkturbedingt einen Rückgang des Auftragseingangs von rund 14 % auf vergleichbarer Basis. Diese Zusammenhänge haben den Aufsichtsrat veranlasst, die Zielsetzung beim organischen Umsatzwachstum für das Geschäftsjahr 2010 entsprechend anzupassen, um ein anspruchsvolles, aber noch realistisches Ziel festzusetzen.

Im Ergebnis ergab sich für die variable Barvergütung folgende Zielsetzung und Zielerreichung:

| Zielparameter               | Gewichtung   | 100%-Zielwert  | Ist-Wert 2010 <sup>1</sup> | Zielerreichung  |
|-----------------------------|--------------|----------------|----------------------------|-----------------|
| Kapitalrendite (ROCE)       | 30 %         | 10,30 %        | 14,88 %                    | 201,78 %        |
| Free Cash Flow (FCF)        | 40 %         | 2.205 Mio. EUR | 7.863 Mio. EUR             | 250,00 %        |
| Umsatzwachstum (organisch)  | 30 %         | - 3,00 %       | - 2,51 %                   | 106,81 %        |
| <b>Gesamtzielerreichung</b> | <b>100 %</b> | -              | -                          | <b>192,58 %</b> |

<sup>1</sup> Die für die Zielerreichung gemessenen Werte zur Kapitalrendite (ROCE) und zum Free Cash Flow wurden um bestimmte Sondereinflüsse bereinigt.



Die für die Zielerreichung gemessenen Werte wurden nach Regeln, die der Aufsichtsrat zu Beginn des Geschäftsjahrs festgelegt hatte, um Sondereinflüsse bereinigt. Dabei wurden die Ist-Werte um Portfoliomaßnahmen, Wertminderungen auf langfristige Vermögenswerte oder bestimmte Restrukturierungsaufwendungen bereinigt, soweit ein Einzelthema aus diesen Bereichen mehr als 5% Einfluss auf die Zielerreichung, bezogen auf den jeweiligen Zielparameter, entfaltet hätte.

Der Aufsichtsrat hat ferner nach pflichtgemäßem Ermessen entschieden, die sich aus der Zielerreichung ergebenden Bonusauszahlungsbeträge um 5% zu erhöhen, sodass sich für die Festsetzung der Auszahlungsbeträge des Bonus ein Zielerreichungsgrad von 202% ergibt. Bei seiner Entscheidung hat der Aufsichtsrat die Erfüllung von Compliance-Programm-relevanten Zielen ebenso berücksichtigt wie das Wachstum des Umweltportfolios des Unternehmens. Ferner hat der Aufsichtsrat die Entwicklung des Geschäftsvolumens und der Profitabilität von Siemens im Geschäftsjahr 2010 im relativen Vergleich zu den Wettbewerbern General Electric, Philips, ABB und Alstom berücksichtigt.

**Langfristige aktienbasierte Vergütung.** Der Aufsichtsrat hat für das Geschäftsjahr 2010 festgelegt, dass bei der Entscheidung über die Zuteilung von Aktienzusagen (*Stock Awards*) das durchschnittliche Ergebnis je Aktie aus fortgeführten Aktivitäten (unverwässert) der vergangenen drei Geschäftsjahre (2008–2010) berücksichtigt werden soll. Aufgrund des Ergebnisses im Geschäftsjahr 2010 ergab sich ein durchschnittlicher EPS-Wert (fortgeführte Aktivitäten) der Geschäftsjahre 2008–2010 von 3,01 EUR, womit ein Zielerreichungsgrad von 114% erreicht wurde. Die Aktienzusagen wurden mit dem Xetra-Schlusskurs der Siemens-Aktie am Tag der Zusage, abzüglich des Gegenwerts der während der Halteperiode erwarteten Dividenden, die dem Berechtigten nicht zustehen, angesetzt. Dieser Wert beträgt 77,76 (im Vj. 60,79) EUR.

**Gesamtvergütung.** Aufgrund der vorgenannten Festsetzungen des Aufsichtsrats ergibt sich für das Geschäftsjahr 2010 eine Gesamtvergütung des Vorstands in Höhe von 34,2 (im Vj. 27,3) Mio. EUR; dies entspricht einer Steigerung von 25%. Von dieser Gesamtvergütung entfielen 24,2 (im Vj. 17,9) Mio. EUR auf die Barvergütung und 10,0 (im Vj. 9,4) Mio. EUR auf die aktienbasierte Vergütung.

Für die einzelnen Mitglieder des Vorstands wurde folgende Vergütung für das Geschäftsjahr 2010 festgesetzt (individualisierte Angaben):

| (Angaben in Stück bzw. EUR)                                  | Feste Vergütung<br>(Grundvergütung) |                  | Variable Barvergütung<br>(Bonus) |                  |
|--------------------------------------------------------------|-------------------------------------|------------------|----------------------------------|------------------|
|                                                              | 2010                                | 2009             | 2010                             | 2009             |
| <b>Zum 30. September 2010 amtierende Vorstandsmitglieder</b> |                                     |                  |                                  |                  |
| Peter Löscher                                                | 1.980.000                           | 1.980.000        | 4.084.622                        | 2.552.512        |
| Wolfgang Dehen                                               | 780.000                             | 780.000          | 1.577.230                        | 1.268.717        |
| Brigitte Ederer <sup>3</sup>                                 | 195.000                             | –                | 394.308                          | –                |
| Dr. Heinrich Hiesinger <sup>4</sup>                          | 780.000                             | 780.000          | 1.577.230                        | 795.549          |
| Joe Kaeser                                                   | 780.000                             | 780.000          | 1.577.230                        | 985.624          |
| Barbara Kux <sup>5</sup>                                     | 780.000                             | 680.333          | 1.577.230                        | 862.421          |
| Prof. Dr. Hermann Requardt                                   | 780.000                             | 780.000          | 1.577.230                        | 953.646          |
| Prof. Dr. Siegfried Russwurm                                 | 780.000                             | 780.000          | 1.577.230                        | 985.624          |
| Peter Y. Solmssen                                            | 780.000                             | 780.000          | 1.577.230                        | 985.624          |
| <b>Ehemaliges Vorstandsmitglied</b>                          |                                     |                  |                                  |                  |
| Jim Reid-Anderson <sup>6</sup>                               | –                                   | 130.000          | –                                | 193.994          |
| <b>Summe</b>                                                 | <b>7.635.000</b>                    | <b>7.470.333</b> | <b>15.519.540</b>                | <b>9.583.711</b> |

- 1 Der in den Geschäftsjahren 2010 und 2009 gemäß IFRS erfasste Aufwand aus aktienbasierter Vergütung (Stock Awards) sowie aus dem Share Matching Plan der amtierenden und ehemaligen Vorstandsmitglieder belief sich auf 8.266.027 EUR beziehungsweise 5.242.845 EUR. Auf die im Geschäftsjahr 2010 amtierenden Mitglieder entfielen dabei folgende Beträge: Peter Löscher 1.930.604 EUR (im Vj. 1.097.255 EUR), Wolfgang Dehen 734.877 EUR (im Vj. 463.803 EUR), Brigitte Ederer 0 EUR (im Vj. 0 EUR), Dr. Heinrich Hiesinger 974.015 EUR (im Vj. 696.222 EUR), Joe Kaeser 1.011.350 EUR (im Vj. 730.740 EUR), Barbara Kux 276.178 EUR (im Vj. 0 EUR), Prof. Dr. Hermann Requardt 975.639 EUR (im Vj. 697.302 EUR), Prof. Dr. Siegfried Russwurm 741.426 EUR (im Vj. 483.864 EUR), Peter Y. Solmssen 680.793 EUR (im Vj. 440.007 EUR). Auf Jim Reid-Anderson, der mit Wirkung zum 1. Mai 2008 zum ordentlichen Mitglied des Vorstands bestellt wurde und zum 30. November 2008 aus dem Vorstand ausgeschieden ist, entfielen 0 EUR (im Vj. 0 EUR).
- 2 In den Sonstigen Vergütungen sind geldwerte Vorteile zum Beispiel aus der Bereitstellung von Dienstwagen in Höhe von 185.338 EUR (im Vj. 184.643 EUR), Zuschüsse zu Versicherungen in Höhe von 71.904 EUR (im Vj. 60.657 EUR), Rechts-, Steuerberatungs-, Wohnungs- und Umzugskosten sowie Kosten im Zusammenhang mit Vorsorgeuntersuchungen in Höhe von 860.642 EUR (im Vj. 640.029 EUR) enthalten.
- 3 Brigitte Ederer wurde mit Wirkung zum 1. Juli 2010 zum ordentlichen Mitglied des Vorstands bestellt.
- 4 Dr. Heinrich Hiesinger ist mit Wirkung zum Ablauf des 30. September 2010 aus dem Vorstand ausgeschieden.
- 5 Barbara Kux wurde mit Wirkung zum 17. November 2008 zum ordentlichen Mitglied des Vorstands bestellt.
- 6 Jim Reid-Anderson, der mit Wirkung zum 1. Mai 2008 zum ordentlichen Mitglied des Vorstands bestellt wurde und zum 30. November 2008 aus dem Vorstand ausgeschieden ist, erhielt im Geschäftsjahr 2010 ein Beraterhonorar sowie eine Karenzentschädigung.

|  | Aktienbasierte Vergütung <sup>1</sup><br>(Stock Awards)<br>2010 |                  | Aktienbasierte Vergütung <sup>1</sup><br>(Stock Awards)<br>2009 |                  | Sonstige Vergütung <sup>2</sup> |                | Gesamt            |                   |
|--|-----------------------------------------------------------------|------------------|-----------------------------------------------------------------|------------------|---------------------------------|----------------|-------------------|-------------------|
|  | Stück                                                           | Geldwerte        | Stück                                                           | Geldwerte        | 2010                            | 2009           | 2010              | 2009              |
|  |                                                                 |                  |                                                                 |                  |                                 |                |                   |                   |
|  | 36.652                                                          | 2.850.060        | 41.126                                                          | 2.500.050        | 67.360                          | 86.470         | 8.982.042         | 7.119.032         |
|  | 14.661                                                          | 1.140.039        | 16.451                                                          | 1.000.056        | 49.984                          | 49.904         | 3.547.253         | 3.098.677         |
|  | 3.666                                                           | 285.068          | –                                                               | –                | 10.372                          | –              | 884.748           | –                 |
|  | –                                                               | –                | 16.451                                                          | 1.000.056        | 35.942                          | 35.750         | 2.393.172         | 2.611.355         |
|  | 14.661                                                          | 1.140.039        | 16.451                                                          | 1.000.056        | 66.587                          | 66.455         | 3.563.856         | 2.832.135         |
|  | 14.661                                                          | 1.140.039        | 14.394                                                          | 875.011          | 462.073                         | 206.569        | 3.959.342         | 2.624.334         |
|  | 14.661                                                          | 1.140.039        | 16.451                                                          | 1.000.056        | 58.947                          | 60.331         | 3.556.216         | 2.794.033         |
|  | 14.661                                                          | 1.140.039        | 16.451                                                          | 1.000.056        | 52.607                          | 43.981         | 3.549.876         | 2.809.661         |
|  | 14.661                                                          | 1.140.039        | 16.451                                                          | 1.000.056        | 314.012                         | 74.942         | 3.811.281         | 2.840.622         |
|  | –                                                               | –                | –                                                               | –                | –                               | 260.927        | –                 | 584.921           |
|  | <b>128.284</b>                                                  | <b>9.975.362</b> | <b>154.226</b>                                                  | <b>9.375.397</b> | <b>1.117.884</b>                | <b>885.329</b> | <b>34.247.786</b> | <b>27.314.770</b> |

**Versorgungszusagen.** Die Höhe der Beiträge für die Beitragsorientierte Siemens Altersversorgung (BSAV) wird vom Aufsichtsrat jährlich neu festgelegt. Die Bereitstellung der BSAV-Beiträge auf dem persönlichen Versorgungskonto erfolgt jeweils im auf das Ende des Geschäftsjahrs folgenden Januar mit Wertstellung zum 1. Januar. Auf dem Versorgungskonto wird bis zum Eintritt des Versorgungsfalls jährlich jeweils am 1. Januar eine Zinsgutschrift (Garantiezins) erteilt.

Für das Geschäftsjahr 2010 wurden den Mitgliedern des Vorstands auf der Grundlage eines am 10. November 2010 vom

Aufsichtsrat gefassten Beschlusses im Rahmen der BSAV Beiträge in Höhe von 4,3 (im Vj. 4,5) Mio. EUR gewährt. Davon entfielen 0,1 (im Vj. 0,1) Mio. EUR auf die Finanzierung der persönlichen Altzusagen, der Restbetrag von 4,2 (im Vj. 4,4) Mio. EUR wurde den individuellen Versorgungskonten gutgeschrieben.

Die folgende Übersicht zeigt unter anderem die auf die einzelnen Mitglieder des Vorstands entfallenden Beiträge (Zuführungen) zur BSAV für das Geschäftsjahr 2010 in individualisierter Form:

**Beitragsorientierte Siemens Altersversorgung (BSAV)**

| (Angaben in EUR)                                             | Stand des BSAV-Versorgungskontos zum |                         | Beitrag insgesamt für |                      | davon zur Finanzierung des Altsystems |                | davon dem BSAV-Versorgungskonto gutgeschrieben |                      |
|--------------------------------------------------------------|--------------------------------------|-------------------------|-----------------------|----------------------|---------------------------------------|----------------|------------------------------------------------|----------------------|
|                                                              | 30.09.2010 <sup>1</sup>              | 30.09.2009 <sup>1</sup> | 2010                  | 2009                 | 2010                                  | 2009           | 2010                                           | 2009                 |
| <b>Zum 30. September 2010 amtierende Vorstandsmitglieder</b> |                                      |                         |                       |                      |                                       |                |                                                |                      |
| Peter Löscher                                                | 11.444.745                           | 10.097.550              | 1.120.000             | 1.120.000            | –                                     | –              | 1.120.000                                      | 1.120.000            |
| Wolfgang Dehen                                               | 1.188.777                            | 768.349                 | 436.800               | 436.800              | 33.660                                | 33.660         | 403.140                                        | 403.140              |
| Brigitte Ederer <sup>2</sup>                                 | –                                    | –                       | 109.200               | –                    | –                                     | –              | 109.200                                        | –                    |
| Dr. Heinrich Hiesinger <sup>3</sup>                          | 1.507.773                            | 1.078.039               | 436.800               | 436.800              | 31.322                                | 31.322         | 405.478                                        | 405.478              |
| Joe Kaeser                                                   | 1.848.093                            | 1.403.805               | 436.800               | 436.800              | 24.097                                | 24.097         | 412.703                                        | 412.703              |
| Barbara Kux <sup>4</sup>                                     | 740.400 <sup>5</sup>                 | –                       | 436.800               | 740.400 <sup>5</sup> | –                                     | –              | 436.800                                        | 740.400 <sup>5</sup> |
| Prof. Dr. Hermann Requardt                                   | 1.785.597                            | 1.346.321               | 436.800               | 436.800              | 27.816                                | 27.816         | 408.984                                        | 408.984              |
| Prof. Dr. Siegfried Russwurm                                 | 1.066.482                            | 628.295                 | 436.800               | 436.800              | 12.750                                | 12.750         | 424.050                                        | 424.050              |
| Peter Y. Solmssen                                            | 11.638.083                           | 10.954.800              | 436.800               | 436.800              | –                                     | –              | 436.800                                        | 436.800              |
| <b>Ehemaliges Vorstandsmitglied</b>                          |                                      |                         |                       |                      |                                       |                |                                                |                      |
| Jim Reid-Anderson <sup>6</sup>                               | –                                    | –                       | –                     | –                    | –                                     | –              | –                                              | –                    |
| <b>Summe</b>                                                 | <b>31.219.950</b>                    | <b>26.277.159</b>       | <b>4.286.800</b>      | <b>4.481.200</b>     | <b>129.645</b>                        | <b>129.645</b> | <b>4.157.155</b>                               | <b>4.351.555</b>     |

- 1 Jeweils unter Berücksichtigung der Zuführungen im Januar 2010, aber ohne Hinzurechnung der zwischenzeitlich aufgelaufenen Mindestverzinsung von derzeit 2,25%.
- 2 Brigitte Ederer wurde mit Wirkung zum 1. Juli 2010 zum ordentlichen Mitglied des Vorstands bestellt.
- 3 Dr. Heinrich Hiesinger ist mit Wirkung zum Ablauf des 30. September 2010 aus dem Vorstand ausgeschieden.
- 4 Barbara Kux wurde mit Wirkung zum 17. November 2008 zum ordentlichen Mitglied des Vorstands bestellt.
- 5 Einschließlich der im Geschäftsjahr 2009 zugesagten Sonderzuführung zum Januar 2010 in Höhe von 340.000 EUR.
- 6 Jim Reid-Anderson wurde mit Wirkung zum 1. Mai 2008 zum ordentlichen Mitglied des Vorstands bestellt und ist zum 30. November 2008 aus dem Vorstand ausgeschieden.

Der Anwartschaftsbarwert («Defined Benefit Obligation» – DBO) sämtlicher Pensionszusagen gegenüber Mitgliedern des Vorstands betrug zum 30. September 2010 44,6 (im Vj. 33,9) Mio. EUR, die in den Anhangsangaben, »Ziffer 24«, enthalten sind.

Frühere Vorstandsmitglieder und deren Hinterbliebene erhielten im Geschäftsjahr 2010 Gesamtbezüge im Sinne von § 314 Abs. 1 Nr. 6b HGB in Höhe von 13,7 (im Vj. 16,1) Mio. EUR sowie 14.661 Aktienzusagen mit einem Geldwert von insgesamt 1,1 Mio. EUR.

Der Anwartschaftsbarwert («Defined Benefit Obligation» – DBO) sämtlicher Pensionszusagen gegenüber früheren Vorstandsmitgliedern und deren Hinterbliebenen betrug zum 30. September 2010 175,7 (im Vj. 159,5) Mio. EUR, die in den Anhangsangaben, »Ziffer 24«, enthalten sind.

**Sonstiges.** Mitglieder des Vorstands erhalten vom Unternehmen keine Kredite.

### 3. ZUSATZANGABEN ZU AKTIENBASIERTEN VERGÜTUNGSTRUMENTEN IM GESCHÄFTSJAHR 2010

Im Folgenden finden sich Informationen zu den von den Mitgliedern des Vorstands gehaltenen Aktienzusagen und -optionen, die im Geschäftsjahr 2010 und in den vorhergehenden Geschäftsjahren Bestandteil der aktienbasierten Vergütung waren, sowie zu den Ansprüchen der Mitglieder des Vorstands auf Matching-Aktien nach dem Siemens Share Matching Plan.

**Aktienzusagen.** Nachfolgende Übersicht zeigt die Entwicklung des Bestands der von den Mitgliedern des Vorstands gehaltenen Aktienzusagen (*Stock Awards*) im Geschäftsjahr 2010:

#### Aktienzusagen

| (Angaben in Stück bzw. EUR)                                  | Bestand am Anfang des Geschäftsjahrs 2010 |                                                                  | Im Geschäftsjahr gewährt |                                                                  | Im Geschäftsjahr erdient |                                                                  | Im Geschäftsjahr verfallen |                                                                  | Bestand am Ende des Geschäftsjahrs 2010 <sup>1</sup> |                                                                  |
|--------------------------------------------------------------|-------------------------------------------|------------------------------------------------------------------|--------------------------|------------------------------------------------------------------|--------------------------|------------------------------------------------------------------|----------------------------|------------------------------------------------------------------|------------------------------------------------------|------------------------------------------------------------------|
|                                                              | Zusagen                                   | Gewichteter durchschnittlicher Marktwert zum Gewährungszeitpunkt | Zusagen                  | Gewichteter durchschnittlicher Marktwert zum Gewährungszeitpunkt | Zusagen                  | Gewichteter durchschnittlicher Marktwert zum Gewährungszeitpunkt | Zusagen                    | Gewichteter durchschnittlicher Marktwert zum Gewährungszeitpunkt | Zusagen                                              | Gewichteter durchschnittlicher Marktwert zum Gewährungszeitpunkt |
| <b>Zum 30. September 2010 amtierende Vorstandsmitglieder</b> |                                           |                                                                  |                          |                                                                  |                          |                                                                  |                            |                                                                  |                                                      |                                                                  |
| Peter Löscher                                                | 76.613                                    | 45,69                                                            | 41.126                   | 60,79                                                            | –                        | –                                                                | –                          | –                                                                | 117.739                                              | 50,96                                                            |
| Wolfgang Dehen                                               | 30.604                                    | 41,14                                                            | 16.451                   | 60,79                                                            | 1.407                    | 57,28                                                            | –                          | –                                                                | 45.648                                               | 47,72                                                            |
| Brigitte Ederer <sup>2</sup>                                 | 6.326                                     | 50,43                                                            | 2.879                    | 60,79                                                            | 445                      | 57,28                                                            | –                          | –                                                                | 8.760                                                | 53,49                                                            |
| Dr. Heinrich Hiesinger <sup>3</sup>                          | 37.664                                    | 52,39                                                            | 16.451                   | 60,79                                                            | 964                      | 57,28                                                            | 53.151                     | 54,90                                                            | –                                                    | –                                                                |
| Joe Kaeser                                                   | 39.586                                    | 53,14                                                            | 16.451                   | 60,79                                                            | 935                      | 57,28                                                            | –                          | –                                                                | 55.102                                               | 55,35                                                            |
| Barbara Kux                                                  | –                                         | –                                                                | 14.394                   | 60,79                                                            | –                        | –                                                                | –                          | –                                                                | 14.394                                               | 60,79                                                            |
| Prof. Dr. Hermann Requardt                                   | 38.483                                    | 52,62                                                            | 16.451                   | 60,79                                                            | 1.309                    | 57,28                                                            | –                          | –                                                                | 53.625                                               | 55,01                                                            |
| Prof. Dr. Siegfried Russwurm                                 | 29.540                                    | 41,75                                                            | 16.451                   | 60,79                                                            | 513                      | 57,28                                                            | –                          | –                                                                | 45.478                                               | 48,46                                                            |
| Peter Y. Solmssen                                            | 26.561                                    | 37,65                                                            | 16.451                   | 60,79                                                            | –                        | –                                                                | –                          | –                                                                | 43.012                                               | 46,50                                                            |
| <b>Summe</b>                                                 | <b>285.377</b>                            | <b>47,00</b>                                                     | <b>157.105</b>           | <b>60,79</b>                                                     | <b>5.573</b>             | <b>57,28</b>                                                     | <b>53.151</b>              | <b>54,90</b>                                                     | <b>383.758</b>                                       | <b>51,40</b>                                                     |

- 1 Die Werte berücksichtigen nicht die im November 2010 für das Geschäftsjahr 2010 gewährten Aktienzusagen. Vgl. hierzu die Angaben auf Seite 36. Sie können aber Aktienzusagen enthalten, die das betreffende Vorstandsmitglied in der Zeit vor seiner Mitgliedschaft im Vorstand als Vergütung erhalten hat.
- 2 Brigitte Ederer wurde mit Wirkung zum 1. Juli 2010 zum ordentlichen Mitglied des Vorstands bestellt.
- 3 Dr. Heinrich Hiesinger ist mit Wirkung zum Ablauf des 30. September 2010 aus dem Vorstand ausgeschieden.

**Aktienoptionen.** Die Aktienoptionen wurden für die Geschäftsjahre 1999 bis 2005 zu den Bedingungen der von der Hauptversammlung der Siemens AG am 18. Februar 1999 und 22. Februar 2001 verabschiedeten Siemens-Aktienoptionspläne 1999 und 2001 ausgegeben (für nähere Informationen zu den Siemens-Aktienoptionsplänen siehe Anhang zum Konzernabschluss, »Ziffer 34«).

Zu Beginn des Geschäftsjahrs 2010 hielten die Mitglieder des Vorstands insgesamt 73.085 Aktienoptionen mit einem gewichteten durchschnittlichen Ausübungspreis von 73,65 EUR. Diese Aktienoptionen entfielen auf folgende Mitglieder des Vorstands (in Klammern: gewichteter durchschnittlicher Ausübungspreis): Dr. Heinrich Hiesinger 23.755 Aktienoptionen (73,56 EUR), Joe Kaeser 21.850 Aktienoptionen (73,62 EUR) und Prof. Dr. Hermann Requardt 27.480 Aktienoptionen (73,74 EUR).

Im Geschäftsjahr 2010 wurden an die Mitglieder des Vorstands keine Aktienoptionen gewährt.



Dr. Heinrich Hiesinger hat am 14. September 2010 11.845 Aktienoptionen bei einem Aktienkurs von 75,46 EUR ausgeübt; der Ausübungspreis dieser Optionen betrug 74,59 EUR. Im Übrigen wurden im Geschäftsjahr 2010 von Mitgliedern des Vorstands keine weiteren Aktienoptionen ausgeübt.

Im Geschäftsjahr 2010 sind insgesamt 33.655 (im Vj. 11.000) Aktienoptionen mit einem Ausübungspreis von 72,54 EUR verfallen. Hiervon entfielen auf Dr. Heinrich Hiesinger 11.910 (im Vj. 0), auf Joe Kaeser 10.355 (im Vj. 11.000) und auf Prof. Dr. Hermann Requardt 11.390 (im Vj. 0) verfallene Aktienoptionen.

Zum 30. September 2010 hielten die Mitglieder des Vorstands insgesamt 27.585 ausstehende Aktienoptionen mit einem Ausübungspreis von 74,59 EUR. Hiervon entfielen auf Joe Kaeser 11.495 und auf Prof. Dr. Hermann Requardt 16.090 Akti-

enoptionen. Die Restlaufzeit dieser Aktienoptionen betrug zum 30. September 2010 0,1 Jahre.

**Aktien aus dem Share Matching Plan.** Die Mitglieder des Vorstands waren im Geschäftsjahr 2010 berechtigt, an dem Siemens Share Matching Plan teilzunehmen und bis zu 50 % des Bruttobetrag ihrer variablen Barvergütung (Bonus) unter dem Plan in Siemens-Aktien zu investieren. Planteilnehmer haben nach Ablauf einer rund dreijährigen Haltefrist für je drei unter dem Plan erworbene und durchgängig gehaltene Aktien Anspruch auf eine Siemens-Aktie ohne Zuzahlung, sofern sie bis zum Ende der Haltefrist ununterbrochen bei der Siemens AG oder einer Konzerngesellschaft beschäftigt waren. Die folgende Übersicht zeigt die von den einzelnen Mitgliedern des Vorstands im Geschäftsjahr 2010 erworbenen Ansprüche auf Matching-Aktien sowie die entsprechenden Geldwerte in individualisierter Form:

#### Ansprüche auf Matching-Aktien aus dem Share Matching Plan

| (Angaben in Stück bzw. EUR)                                  | Bestand am Anfang des Geschäftsjahrs 2010 |                                                               | Im Geschäftsjahr erworben     |                                                               | Im Geschäftsjahr fällig       |                                                               | Im Geschäftsjahr verfallen    |                                                               | Bestand am Ende des Geschäftsjahrs 2010 <sup>1,2</sup> |                                                               |
|--------------------------------------------------------------|-------------------------------------------|---------------------------------------------------------------|-------------------------------|---------------------------------------------------------------|-------------------------------|---------------------------------------------------------------|-------------------------------|---------------------------------------------------------------|--------------------------------------------------------|---------------------------------------------------------------|
|                                                              | Ansprüche auf Matching-Aktien             | Gewichteter durchschnittlicher Marktwert zum Erwerbszeitpunkt | Ansprüche auf Matching-Aktien | Gewichteter durchschnittlicher Marktwert zum Erwerbszeitpunkt | Ansprüche auf Matching-Aktien | Gewichteter durchschnittlicher Marktwert zum Erwerbszeitpunkt | Ansprüche auf Matching-Aktien | Gewichteter durchschnittlicher Marktwert zum Erwerbszeitpunkt | Ansprüche auf Matching-Aktien                          | Gewichteter durchschnittlicher Marktwert zum Erwerbszeitpunkt |
| <b>Zum 30. September 2010 amtierende Vorstandsmitglieder</b> |                                           |                                                               |                               |                                                               |                               |                                                               |                               |                                                               |                                                        |                                                               |
| Peter Löscher                                                | –                                         | –                                                             | –                             | –                                                             | –                             | –                                                             | –                             | –                                                             | –                                                      | –                                                             |
| Wolfgang Dehen                                               | 4.140                                     | 21,34                                                         | 1.705                         | 47,18                                                         | –                             | –                                                             | –                             | –                                                             | 5.845                                                  | 28,88                                                         |
| Brigitte Ederer <sup>3</sup>                                 | 560                                       | 21,34                                                         | –                             | –                                                             | –                             | –                                                             | –                             | –                                                             | 560                                                    | 21,34                                                         |
| Dr. Heinrich Hiesinger <sup>4</sup>                          | 3.762                                     | 21,34                                                         | 1.284                         | 47,18                                                         | –                             | –                                                             | 5.046                         | 27,92                                                         | –                                                      | –                                                             |
| Joe Kaeser                                                   | 3.855                                     | 21,34                                                         | 1.590                         | 47,18                                                         | –                             | –                                                             | –                             | –                                                             | 5.445                                                  | 28,89                                                         |
| Barbara Kux <sup>5</sup>                                     | –                                         | –                                                             | 698                           | 47,18                                                         | –                             | –                                                             | –                             | –                                                             | 698                                                    | 47,18                                                         |
| Prof. Dr. Hermann Requardt                                   | 3.228                                     | 21,34                                                         | 1.027                         | 47,18                                                         | –                             | –                                                             | –                             | –                                                             | 4.255                                                  | 27,58                                                         |
| Prof. Dr. Siegfried Russwurm                                 | 4.926                                     | 21,34                                                         | 533                           | 47,18                                                         | –                             | –                                                             | –                             | –                                                             | 5.459                                                  | 23,86                                                         |
| Peter Y. Solmssen                                            | 6.051                                     | 21,34                                                         | –                             | –                                                             | –                             | –                                                             | –                             | –                                                             | 6.051                                                  | 21,34                                                         |
| <b>Summe</b>                                                 | <b>26.522</b>                             | <b>21,34</b>                                                  | <b>6.837</b>                  | <b>47,18</b>                                                  | <b>–</b>                      | <b>–</b>                                                      | <b>5.046</b>                  | <b>27,92</b>                                                  | <b>28.313</b>                                          | <b>26,41</b>                                                  |

1 Die Werte können Ansprüche enthalten, die vor der Mitgliedschaft im Vorstand erworben wurden.

2 Die Ansprüche der zum Ende des Geschäftsjahrs 2010 amtierenden Mitglieder des Vorstands haben folgende Geldwerte: Peter Löscher 0 EUR (im Vj. 0 EUR), Wolfgang Dehen 169.623 EUR (im Vj. 88.808 EUR), Brigitte Ederer 11.958 EUR (im Vj. 11.958 EUR), Dr. Heinrich Hiesinger 0 EUR (im Vj. 80.741 EUR), Joe Kaeser 158.102 EUR (im Vj. 82.726 EUR), Barbara Kux 33.282 EUR (im Vj. 0 EUR), Prof. Dr. Hermann Requardt 118.158 EUR (im Vj. 69.346 EUR), Prof. Dr. Siegfried Russwurm 131.068 EUR (im Vj. 105.581 EUR), Peter Y. Solmssen 129.588 EUR (im Vj. 129.588 EUR). Jim Reid-Anderson, der mit Wirkung zum 1. Mai 2008 zum ordentlichen Mitglied des Vorstands bestellt wurde und zum 30. November 2008 aus dem Vorstand ausgeschieden ist, erhielt in den Geschäftsjahren 2009 und 2010 keine Ansprüche auf Matching-Aktien. Die vorgenannten Geldwerte berücksichtigen auch, dass der Erwerb der Aktien im Rahmen des Share Matching Plan zum niedrigsten Aktienkurs am 17. Dezember 2009 (im Vj. 17. Dezember 2008) erfolgte beziehungsweise beim Basis-Aktien-Programm ein Firmenzuschuss gewährt wurde.

3 Brigitte Ederer wurde mit Wirkung zum 1. Juli 2010 zum ordentlichen Mitglied des Vorstands bestellt.

4 Dr. Heinrich Hiesinger ist mit Wirkung zum Ablauf des 30. September 2010 aus dem Vorstand ausgeschieden.

5 Barbara Kux wurde mit Wirkung zum 17. November 2008 zum ordentlichen Mitglied des Vorstands bestellt.

Die Siemens Share Ownership Guidelines verpflichten die Mitglieder des Vorstands, während ihrer Zugehörigkeit zum Vorstand ein Vielfaches ihrer durchschnittlichen Grundvergütung (für den Vorstandsvorsitzenden 300 %, für die übrigen Mitglieder des Vorstands 200%) in Siemens-Aktien zu halten. Zum 30. September 2010 wurden die Share Ownership Guidelines von den einzelnen Mitgliedern des Vorstands wie folgt erfüllt:

| (Angaben in Stück bzw. EUR)                                  | Aktienbesitz      |                   | Verpflichtung nach Share Ownership Guidelines |                                         |                                                |
|--------------------------------------------------------------|-------------------|-------------------|-----------------------------------------------|-----------------------------------------|------------------------------------------------|
|                                                              | Anzahl von Aktien | Wert <sup>1</sup> | Erforderlicher Betrag <sup>2</sup>            | Erforderliche Aktienanzahl <sup>1</sup> | Datum des erstmaligen Nachweises der Erfüllung |
| <b>Zum 30. September 2010 amtierende Vorstandsmitglieder</b> |                   |                   |                                               |                                         |                                                |
| Peter Löscher                                                | 100.000           | 7.743.000         | 5.955.000                                     | 76.909                                  | 09.03.2012                                     |
| Wolfgang Dehen                                               | 22.632            | 1.752.396         | 1.620.000                                     | 20.923                                  | 09.03.2012                                     |
| Brigitte Ederer <sup>3</sup>                                 | 1.681             | 130.160           | 1.800.000                                     | 23.247                                  | 13.03.2015                                     |
| Dr. Heinrich Hiesinger <sup>4</sup>                          | –                 | –                 | –                                             | –                                       | –                                              |
| Joe Kaeser                                                   | 27.655            | 2.141.327         | 1.620.000                                     | 20.923                                  | 09.03.2012                                     |
| Barbara Kux                                                  | 6.193             | 479.524           | 1.680.000                                     | 21.698                                  | 08.03.2013                                     |
| Prof. Dr. Hermann Requardt                                   | 15.009            | 1.162.147         | 1.620.000                                     | 20.923                                  | 09.03.2012                                     |
| Prof. Dr. Siegfried Russwurm                                 | 20.326            | 1.573.842         | 1.620.000                                     | 20.923                                  | 09.03.2012                                     |
| Peter Y. Solmssen                                            | 31.028            | 2.402.498         | 1.620.000                                     | 20.923                                  | 09.03.2012                                     |
| <b>Summe</b>                                                 | <b>224.524</b>    | <b>17.384.894</b> | <b>17.535.000</b>                             | <b>226.469</b>                          | <b>–</b>                                       |

1 Auf der Grundlage des Schlusskurses der Siemens-Aktie im Xetra-Handel am 30. September 2010 (77,43 EUR).

2 Seit dem 1. Oktober 2010 ist für die Höhe der Verpflichtung die durchschnittliche Grundvergütung während der vergangenen vier Jahre maßgeblich.

3 Brigitte Ederer wurde mit Wirkung zum 1. Juli 2010 zum ordentlichen Mitglied des Vorstands bestellt.

4 Dr. Heinrich Hiesinger ist mit Wirkung zum Ablauf des 30. September 2010 aus dem Vorstand ausgeschieden.



**Wesentliche Anpassungen im Vergütungssystem für den Vorstand** (ab Geschäftsjahr 2011)  
– im Vergleich zum bisherigen System

|                                                                                                                                                                                                                                                                                                                                                          |                                                                                                                                                                                                                                                                                                                                        |                                                                                                                                                                                                                                                             |
|----------------------------------------------------------------------------------------------------------------------------------------------------------------------------------------------------------------------------------------------------------------------------------------------------------------------------------------------------------|----------------------------------------------------------------------------------------------------------------------------------------------------------------------------------------------------------------------------------------------------------------------------------------------------------------------------------------|-------------------------------------------------------------------------------------------------------------------------------------------------------------------------------------------------------------------------------------------------------------|
| <p><b>Stärkung der langfristigen Vergütungskomponenten</b></p> <p>Bindung der langfristigen aktienorientierten Vergütung (<i>Stock Awards</i>) an Ziele mit mehrjähriger Bemessungsgrundlage und Verlängerung der Sperrfrist für aktienbasierte Vergütungskomponenten von drei auf vier Jahre.</p>                                                       | <p><b>Reduzierung der Barvergütung</b></p> <p>Auszahlung von 50 % des Bonus in Form von unverfallbaren Zusagen auf Siemens-Aktien mit einer Sperrfrist von vier Jahren (<i>Bonus Awards</i>).</p>                                                                                                                                      | <p><b>Anpassung der Grundvergütung</b></p> <p>Die Grundvergütung der Mitglieder des Vorstands (mit Ausnahme des Vorstandsvorsitzenden) wird auf 900.000 EUR angepasst; die bisherige Grundvergütung befand sich in etwa auf dem Niveau des Jahres 2003.</p> |
| <p><b>Stärkere Erfolgsabhängigkeit der Vergütung</b></p> <p>Stärkung der variablen Einkommensbestandteile durch Einführung einer Schwankungsbreite von 0 bis 200 % für die langfristige aktienbasierte Vergütung (<i>Stock Awards</i>).</p> <p>Bei Zielverfehlungen können Bonus und langfristige aktienorientierte Vergütung vollständig entfallen.</p> | <p><b>Steigender Anteil der aufgeschobenen Vergütung</b></p> <p>Bei einer Zielerreichung von 100 % erhalten die Organmitglieder mehr als die Hälfte der Vergütung nach Ablauf einer Sperrfrist von vier Jahren.</p> <p>Der Wert dieses Vergütungsanteils hängt von der Entwicklung der Siemens-Aktie während dieser Sperrfrist ab.</p> | <p><b>Reduzierung der sonstigen Vergütungskomponenten</b></p> <p>Die Möglichkeit zur Teilnahme der Vorstandsmitglieder am Share Matching Plan entfällt.</p>                                                                                                 |

Der Aufsichtsrat hat ferner beschlossen, den Maximalbetrag des Bonus (*Cap*) von 250 % auf nunmehr 200 % abzusenken.

**Langfristige aktienbasierte Vergütung.** Die langfristige aktienbasierte Vergütung wird auch künftig in Form von verfallbaren Aktienzusagen (*Stock Awards*) gewährt. Um auch hier den Nachhaltigkeitscharakter der Vergütungskomponente weiter zu stärken, hat der Aufsichtsrat die Sperrfrist ab dem Geschäftsjahr 2011 um ein Jahr von bisher drei auf vier Jahre verlängert.

Die jährlichen Zielbeträge für die Stock-Awards-Zusagen (Vorstandsvorsitzender 2,5 Mio. EUR, weitere Mitglieder des Vorstands 1,0 Mio. EUR) bleiben unverändert. Allerdings hat der

**Pflichten nach Share Ownership Guidelines**

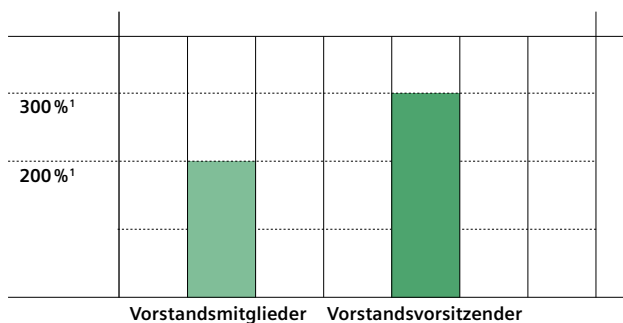

<sup>1</sup> Prozentsatz der Grundvergütung.

Aufsichtsrat für die künftige Zuteilung der Stock Awards verbindliche Regelungen festgelegt, sodass auch diese Vergütungskomponente vollständig erfolgsabhängig ist. Ausgangspunkt ist das ab dem Geschäftsjahr 2011 unternehmensweit geltende Zielsystem One Siemens. Dieses stellt die nachhaltige Steigerung des Unternehmenswerts von Siemens in den Mittelpunkt. Die Zuteilungsregelungen für die langfristige aktienbasierte Vergütung tragen dem wie folgt Rechnung:

- > Zum einen wird die jährliche Zuteilung von Stock Awards an der Nachhaltigkeit des geschäftlichen Erfolgs ausgerichtet. Hierzu wird die eine Hälfte des jährlichen Zielbetrags der Stock-Awards-Zusagen an den Durchschnitt des veröffentlichten Ergebnisses je Aktie der vergangenen drei Geschäftsjahre (unverwässert) geknüpft. Am Ende des Geschäftsjahrs stellt der Aufsichtsrat einen Zielerreichungsgrad fest, der zwischen 0 % und 200 % (*Cap*) schwanken kann. Diese Zielerreichung bestimmt den tatsächlichen Geldwert der Zusage und eine hieraus resultierende Anzahl von Stock Awards.
- > Zum anderen soll sich die relative Entwicklung des Unternehmenswerts von Siemens im Vergleich zu seinen Wettbewerbern in der Vergütung unmittelbar auswirken. Um dies zu erreichen, gewährt der Aufsichtsrat für die andere Hälfte des jährlichen Zielbetrags der Stock-Awards-Zusagen zunächst eine Anzahl von Stock Awards, die dem Geldwert des hälftigen Zielbetrags am Zusagetag entspricht. Der Aufsichtsrat legt ferner ein Zielsystem (Zielwert für 100 % und Zielgerade) für die Entwicklung des Kurses der Siemens-Aktie im Vergleich zu derzeit fünf Wettbewerbern (ABB, Ge-

neral Electric, Philips, Rockwell, Schneider) fest. Der Referenzzeitraum für die Zielmessung entspricht der vierjährigen Sperrfrist der Stock Awards. Nach Ablauf dieser Sperrfrist wird festgestellt, inwieweit sich die Siemens-Aktie relativ zu diesen Wettbewerbern besser oder schlechter entwickelt hat. Hieraus resultiert ein Zielerreichungsgrad zwischen 0 % und 200 % (*Cap*). Liegt der Zielerreichungsgrad über 100 %, erhalten die Mitglieder des Vorstands eine zusätzliche Barzahlung, deren Höhe sich nach der Zielüberschreitung bemisst. Im Fall eines Zielerreichungsgrads von unter 100 % verfällt eine der Zielunterschreitung entsprechende Anzahl von Aktienzusagen ersatzlos.

**Share Ownership Guidelines.** Die Anforderungen der Share Ownership Guidelines bleiben im Grundsatz unverändert. Für die Höhe der Verpflichtung ist künftig jedoch die durchschnittliche Grundvergütung während der vergangenen vier Jahre maßgeblich. Zwischenzeitliche Anpassungen der Grundvergütung werden somit berücksichtigt. Zudem können künftig die unverfallbaren Aktienzusagen (*Bonus Awards*) bei der Erfüllung der Share Ownership Guidelines angerechnet werden.

**Share Matching Plan.** Die bisher für den Vorstand mögliche Teilnahme am Share Matching Plan für Mitarbeiter und Führungskräfte ist unter dem neuen Vergütungssystem für den Vorstand nicht mehr möglich.

**Ausgleichszahlungen.** Bei den Regelungen für Ausgleichszahlungen gilt künftig einheitlich für alle Vorstandsmitglieder, dass die Abfindung im Fall eines »Change of Control« maximal zwei Jahresvergütungen beträgt. In die Berechnung der Jahresvergütung wird der Zielbetrag für die Stock Awards einbezogen. Zudem werden Ausgleichs- oder Abfindungszahlungen zur pauschalen Anrechnung einer Abzinsung sowie anderweitigen Verdiensts künftig um 15 % gekürzt; die Kürzung bezieht sich jedoch nur auf den Teil der Ausgleichs- oder Abfindungszahlung, der ohne Berücksichtigung der ersten sechs Monate der restlichen Vertragslaufzeit ermittelt wurde.

## 5. VERGÜTUNG DES AUFSICHTSRATS

Die Vergütung des Aufsichtsrats ist auf Vorschlag von Vorstand und Aufsichtsrat durch die Hauptversammlung festgelegt worden. Sie ist in der Satzung geregelt. Die Aufsichtsratsvergütung orientiert sich an der Größe des Unternehmens und trägt der Verantwortung und dem Tätigkeitsumfang der Aufsichtsratsmitglieder sowie der wirtschaftlichen Lage und dem Erfolg der Gesellschaft Rechnung. Vorsitz, stellvertretender Vorsitz sowie Vorsitz und Mitgliedschaft im Prüfungsausschuss und im Präsidium sowie – in geringerem Maße – im Compliance- und Finanz- und Investitionsausschuss werden zusätzlich vergütet.

Die gegenwärtig geltenden Vergütungsregeln für den Aufsichtsrat wurden von der Hauptversammlung am 27. Januar 2009 verabschiedet; sie sind in § 17 der Satzung enthalten. Danach enthält die Vergütung für das Geschäftsjahr 2010 drei Komponenten:

- > einen festen Bestandteil,
- > einen vom Ergebnis je Aktie abhängigen kurzfristigen Bestandteil und
- > einen vom Ergebnis je Aktie abhängigen langfristigen Bestandteil.

Nach diesen Regeln erhalten Mitglieder des Aufsichtsrats jährlich eine feste Vergütung in Höhe von 50.000 EUR und eine kurzfristige variable Vergütung in Höhe von 150 EUR je 0,01 EUR des im Konzernabschluss ausgewiesenen Ergebnisses je Aktie, das einen Mindestbetrag von 1 EUR übersteigt; der Mindestbetrag erhöht sich jährlich, erstmalig für das am 1. Oktober 2009 begonnene Geschäftsjahr, um 10 %. Zusätzlich wird eine langfristige variable Vergütung gezahlt in Höhe von 250 EUR je 0,01 EUR, um die der Durchschnitt der im Konzernabschluss ausgewiesenen Ergebnisse je Aktie für die vergangenen drei abgelaufenen Geschäftsjahre den Betrag von 2 EUR übersteigt; der Mindestbetrag erhöht sich jährlich, erstmalig für das am 1. Oktober 2009 begonnene Geschäftsjahr, um 10 %. Maßgeblich für die Ermittlung der Aufsichtsratsvergütung ist das unverwässerte Ergebnis je Aktie aus fortgeführten Aktivitäten, das in dem im Einklang mit den jeweils anwendbaren Rechnungslegungsvorschriften aufgestellten Konzernabschluss ausgewiesen ist.



| (Angaben in EUR)                                                 | 2010             |                                 |                                 |                              | 2009             |                                 |                                 |                              |
|------------------------------------------------------------------|------------------|---------------------------------|---------------------------------|------------------------------|------------------|---------------------------------|---------------------------------|------------------------------|
|                                                                  | Feste Vergütung  | Kurzfristige variable Vergütung | Langfristige variable Vergütung | Gesamt                       | Feste Vergütung  | Kurzfristige variable Vergütung | Langfristige variable Vergütung | Gesamt                       |
| <b>Zum 30. September 2010 amtierende Aufsichtsratsmitglieder</b> |                  |                                 |                                 |                              |                  |                                 |                                 |                              |
| Dr. Gerhard Cromme <sup>1</sup>                                  | 200.000          | 206.400                         | 81.000                          | 487.400                      | 200.000          | 96.000                          | 88.000                          | 384.000                      |
| Berthold Huber <sup>1,2</sup>                                    | 100.000          | 103.200                         | 40.500                          | 243.700                      | 78.125           | 37.500                          | 34.375                          | 150.000                      |
| Dr. Josef Ackermann <sup>1</sup>                                 | 100.000          | 103.200                         | 40.500                          | 243.700                      | 83.333           | 40.000                          | 36.667                          | 160.000                      |
| Lothar Adler <sup>1,2</sup>                                      | 100.000          | 103.200                         | 40.500                          | 243.700                      | 90.625           | 43.500                          | 39.875                          | 174.000                      |
| Jean-Louis Beffa <sup>1</sup>                                    | 62.500           | 64.500                          | 25.313                          | 152.313                      | 53.906           | 25.875                          | 23.719                          | 103.500                      |
| Gerd von Brandenstein <sup>1</sup>                               | 62.500           | 64.500                          | 25.313                          | 152.313                      | 62.500           | 30.000                          | 27.500                          | 120.000                      |
| Michael Diekmann                                                 | 47.222           | 48.733                          | 19.125                          | 115.080                      | 47.917           | 23.000                          | 21.083                          | 92.000                       |
| Dr. Hans Michael Gaul <sup>1</sup>                               | 112.500          | 116.100                         | 45.563                          | 274.163                      | 112.500          | 54.000                          | 49.500                          | 216.000                      |
| Prof. Dr. Peter Gruss                                            | 47.222           | 48.733                          | 19.125                          | 115.080                      | 50.000           | 24.000                          | 22.000                          | 96.000                       |
| Bettina Haller <sup>1,2</sup>                                    | 87.500           | 90.300                          | 35.438                          | 213.238                      | 75.000           | 36.000                          | 33.000                          | 144.000                      |
| Hans-Jürgen Hartung <sup>2,3</sup>                               | 50.000           | 51.600                          | 20.250                          | 121.850                      | 37.500           | 18.000                          | 16.500                          | 72.000                       |
| Harald Kern <sup>2</sup>                                         | 50.000           | 51.600                          | 20.250                          | 121.850                      | 50.000           | 24.000                          | 22.000                          | 96.000                       |
| Dr. Nicola Leibinger-Kammüller                                   | 47.222           | 48.733                          | 19.125                          | 115.080                      | 50.000           | 24.000                          | 22.000                          | 96.000                       |
| Werner Mönius <sup>1,2</sup>                                     | 62.500           | 64.500                          | 25.313                          | 152.313                      | 56.250           | 27.000                          | 24.750                          | 108.000                      |
| Håkan Samuelsson <sup>1</sup>                                    | 62.500           | 64.500                          | 25.313                          | 152.313                      | 59.896           | 28.750                          | 26.354                          | 115.000                      |
| Dieter Scheitor <sup>1,2</sup>                                   | 87.500           | 90.300                          | 35.438                          | 213.238                      | 87.500           | 42.000                          | 38.500                          | 168.000                      |
| Dr. Rainer Sieg                                                  | 50.000           | 51.600                          | 20.250                          | 121.850                      | 50.000           | 24.000                          | 22.000                          | 96.000                       |
| Birgit Steinborn <sup>1,2</sup>                                  | 87.500           | 90.300                          | 35.438                          | 213.238                      | 81.250           | 39.000                          | 35.750                          | 156.000                      |
| Lord Iain Vallance of Tummel <sup>1</sup>                        | 87.500           | 90.300                          | 35.438                          | 213.238                      | 83.854           | 40.250                          | 36.896                          | 161.000                      |
| Sibylle Wankel <sup>1,2,4</sup>                                  | 62.500           | 64.500                          | 25.313                          | 152.313                      | 31.250           | 15.000                          | 13.750                          | 60.000                       |
| <b>Ehemalige Aufsichtsratsmitglieder</b>                         |                  |                                 |                                 |                              |                  |                                 |                                 |                              |
| Ralf Heckmann <sup>2,3</sup>                                     | –                | –                               | –                               | –                            | 45.833           | 22.000                          | 20.167                          | 88.000                       |
| Heinz Hawreliuk <sup>2,4</sup>                                   | –                | –                               | –                               | –                            | 43.750           | 21.000                          | 19.250                          | 84.000                       |
| <b>Summe</b>                                                     | <b>1.566.666</b> | <b>1.616.799</b>                | <b>634.505</b>                  | <b>3.817.970<sup>5</sup></b> | <b>1.530.989</b> | <b>734.875</b>                  | <b>673.636</b>                  | <b>2.939.500<sup>5</sup></b> |

- 1 Dr. Gerhard Cromme als Vorsitzender des Aufsichtsrats und des Präsidial-, Compliance-, Finanz- und Investitionsausschusses sowie als Mitglied des Prüfungsausschusses, Berthold Huber als stellvertretender Vorsitzender des Aufsichtsrats und Mitglied des Präsidiums, Dr. Josef Ackermann als stellvertretender Vorsitzender des Aufsichtsrats und Mitglied des Präsidiums, Lothar Adler als Mitglied des Präsidial- und des Compliance-Ausschusses sowie als Mitglied des Finanz- und Investitionsausschusses, Jean-Louis Beffa und Gerd von Brandenstein als Mitglieder des Finanz- und Investitionsausschusses, Dr. Hans Michael Gaul als Vorsitzender des Prüfungsausschusses und Mitglied des Compliance-Ausschusses, Bettina Haller als Mitglied des Prüfungsausschusses und des Compliance-Ausschusses, Werner Mönius und Håkan Samuelsson als Mitglieder des Finanz- und Investitionsausschusses, Dieter Scheitor als Mitglied des Prüfungs- sowie des Finanz- und Investitionsausschusses, Birgit Steinborn als Mitglied des Prüfungsausschusses sowie des Finanz- und Investitionsausschusses, Lord Iain Vallance of Tummel als Mitglied des Prüfungs- und des Compliance-Ausschusses sowie Sibylle Wankel als Mitglied des Compliance-Ausschusses erhalten eine höhere feste und variable Vergütung.
- 2 Die Vertreter der Arbeitnehmer im Aufsichtsrat, die Arbeitnehmer gemäß § 3 Abs. 1 Nr. 1 des Mitbestimmungsgesetzes (MitbestG) vertreten, sowie die Vertreter der Gewerkschaften im Aufsichtsrat haben erklärt, ihre Vergütung entsprechend den Richtlinien des Deutschen Gewerkschaftsbundes an die Hans-Böckler-Stiftung abzuführen.
- 3 Hans-Jürgen Hartung rückte mit Wirkung ab Beendigung der Hauptversammlung am 27. Januar 2009 durch gerichtliche Bestellung als Nachfolger von Ralf Heckmann in den Aufsichtsrat nach.
- 4 Sibylle Wankel, vorher Ersatzmitglied im Aufsichtsrat, rückte zum 1. April 2009 als Nachfolgerin von Heinz Hawreliuk in den Aufsichtsrat nach.
- 5 Zusätzlich erhielten die Mitglieder des Aufsichtsrats für jede Sitzung des Aufsichtsrats und seiner Ausschüsse, an der sie teilgenommen haben, ein Sitzungsgeld in Höhe von 1.000 EUR. Im Geschäftsjahr 2010 erhielt Dr. Gerhard Cromme Sitzungsgeld in Höhe von 26.000 EUR (im Vj. 28.000 EUR), Lothar Adler in Höhe von 20.000 EUR (im Vj. 17.000 EUR), Dr. Hans Michael Gaul in Höhe von 17.000 EUR (im Vj. 20.000 EUR), Bettina Haller in Höhe von 17.000 EUR (im Vj. 16.000 EUR), Lord Iain Vallance of Tummel in Höhe von 17.000 EUR (im Vj. 17.000 EUR), Dieter Scheitor in Höhe von 14.000 EUR (im Vj. 17.000 EUR), Birgit Steinborn in Höhe von 14.000 EUR (im Vj. 14.000 EUR), Dr. Josef Ackermann in Höhe von 13.000 EUR (im Vj. 6.000 EUR), Berthold Huber in Höhe von 12.000 EUR (im Vj. 7.000 EUR), Sibylle Wankel in Höhe von 11.000 EUR (im Vj. 5.000 EUR), Jean-Louis Beffa in Höhe von 8.000 EUR (im Vj. 9.000 EUR), Gerd von Brandenstein in Höhe von 8.000 EUR (im Vj. 11.000 EUR), Werner Mönius in Höhe von 8.000 EUR (im Vj. 10.000 EUR), Håkan Samuelsson in Höhe von 8.000 EUR (im Vj. 9.000 EUR), Hans-Jürgen Hartung in Höhe von 6.000 EUR (im Vj. 4.000 EUR), Harald Kern in Höhe von 6.000 EUR (im Vj. 8.000 EUR), Dr. Rainer Sieg in Höhe von 6.000 EUR (im Vj. 8.000 EUR), Michael Diekmann in Höhe von 5.000 EUR (im Vj. 7.000 EUR), Prof. Dr. Peter Gruss in Höhe von 5.000 EUR (im Vj. 8.000 EUR), Dr. Nicola Leibinger-Kammüller in Höhe von 5.000 EUR (im Vj. 8.000 EUR), Ralf Heckmann in Höhe von 0 EUR (im Vj. 12.000 EUR) und Heinz Hawreliuk in Höhe von 0 EUR (im Vj. 11.000 EUR).

Der Vorsitzende des Aufsichtsrats erhält das Dreifache, jeder der Stellvertreter das Eineinhalbfache der festen und der variablen Vergütung eines einfachen Mitglieds. Außerdem erhält jedes Mitglied des Prüfungsausschusses und des Präsidiums jeweils eine zusätzliche Vergütung in Höhe der Hälfte der festen und der variablen Vergütung eines einfachen Mitglieds, die Vorsitzenden dieser Ausschüsse erhalten eine zusätzliche Vergütung in Höhe der vollen festen und variablen Vergütung eines einfachen Mitglieds. Weiter erhält jedes Mitglied des Compliance- sowie des Finanz- und Investitionsausschusses jeweils eine zusätzliche Vergütung in Höhe eines Viertels der festen und der variablen Vergütung eines einfachen Mitglieds, die Vorsitzenden dieser Ausschüsse in Höhe der Hälfte der festen und variablen Vergütung eines einfachen Mitglieds. Die Gesamtvergütung des Aufsichtsratsvorsitzenden darf das Vierfache der festen und der variablen Vergütung eines einfachen Mitglieds nicht übersteigen. Nimmt ein Aufsichtsratsmitglied an einer Sitzung des Aufsichtsrats nicht teil, reduziert sich ein Drittel der ihm insgesamt zustehenden festen und variablen Vergütung prozentual im Verhältnis der im Geschäftsjahr stattgefundenen Aufsichtsratssitzungen gegenüber den Aufsichtsratssitzungen, an denen das Aufsichtsratsmitglied nicht teilgenommen hat.

Zusätzlich erhalten die Mitglieder des Aufsichtsrats für jede Sitzung des Aufsichtsrats und seiner Ausschüsse, an der sie teilnehmen, ein Sitzungsgeld in Höhe von 1.000 EUR.

Mitgliedern des Aufsichtsrats werden Auslagen, die in Zusammenhang mit der Ausübung des Mandats entstehen, sowie die auf die Bezüge entfallende Umsatzsteuer ersetzt. Dem Vorsitzenden des Aufsichtsrats werden darüber hinaus für die Wahrnehmung seiner Aufgaben ein Büro mit Sekretariat und die Siemens-Fahrbereitschaft zur Verfügung gestellt.

Mitglieder des Aufsichtsrats erhalten vom Unternehmen keine Kredite.

## **6. SONSTIGES**

Die Gesellschaft unterhält eine Vermögensschaden-Haftpflicht-Gruppenversicherung für Organmitglieder und bestimmte Mitarbeiter des Siemens-Konzerns. Sie wird jährlich abgeschlossen beziehungsweise verlängert. Die Versicherung deckt das persönliche Haftungsrisiko für den Fall ab, dass der Personenkreis bei Ausübung seiner Tätigkeit für Vermögensschäden in Anspruch genommen wird. In der Police für das Geschäftsjahr 2010 ist für die Mitglieder des Vorstands und des Aufsichtsrats ein den Vorgaben des Aktiengesetzes und des Deutschen Corporate Governance Kodex entsprechender Selbstbehalt enthalten, der die bisher vereinbarte Selbstverpflichtung ersetzt hat. Im Rahmen dieser Selbstverpflichtung wurde seit dem 1. Oktober 2005 mit den Mitgliedern des Vorstands beziehungsweise des Aufsichtsrats ein Selbstbehalt bis zu einer Höhe von 20% des jährlichen Festgehalts beziehungsweise der jährlichen festen Vergütung individuell vereinbart.

# Zusammengefasster Lagebericht

---

|     |                                                                                                |
|-----|------------------------------------------------------------------------------------------------|
| 50  | Geschäft und Rahmenbedingungen                                                                 |
| 81  | Geschäftsjahr 2010 – Finanzieller Überblick                                                    |
| 84  | Ertragslage                                                                                    |
| 104 | Finanzlage                                                                                     |
| 118 | Vermögenslage                                                                                  |
| 121 | Gesamtaussage zur wirtschaftlichen Lage                                                        |
| 122 | Nachtragsbericht                                                                               |
| 123 | Bericht über die voraussichtliche<br>Entwicklung mit ihren wesentlichen<br>Chancen und Risiken |
| 140 | Angaben nach § 289 Abs. 4 und<br>§ 315 Abs. 4 HGB und erläuternder Bericht                     |
| 145 | Angaben nach § 289 Abs. 5<br>und § 315 Abs. 2, Nr. 5 HGB<br>und erläuternder Bericht           |
| 148 | Vergütungsbericht und Erklärung zur<br>Unternehmensführung nach § 289a HGB                     |
| 148 | Weitere Informationen zu zusätzlichen<br>Finanzkennzahlen                                      |
| 151 | Siemens AG (Erläuterungen auf Basis HGB)                                                       |

---

## Geschäft und Rahmenbedingungen

### DER SIEMENS-KONZERN – ORGANISATION UND GRUNDLAGEN DER BERICHTERSTATTUNG

Wir sind ein global agierender, integrierter Technologiekonzern mit Kernaktivitäten auf den Gebieten Industrie und Energie sowie im Gesundheitssektor; dabei nehmen wir weltweit führende Marktpositionen in der Mehrzahl unserer Geschäftsfelder ein. Wir können auf eine mehr als 160-jährige, erfolgreiche Geschichte zurückblicken, mit so wegweisenden und revolutionären Innovationen wie der Erfindung des Dynamos, der ersten kommerziellen Glühlampe, der ersten elektrischen Straßenbahn, der Errichtung des ersten öffentlichen Kraftwerks und den ersten Innenaufnahmen des menschlichen Körpers. Mit unseren mehr als 400.000 Mitarbeitern sind wir heute in rund 190 Ländern aktiv und haben im Geschäftsjahr 2010 einen Konzernumsatz von 75,978 Mrd. EUR erwirtschaftet. Unsere Fertigungskapazitäten verteilen sich weltweit auf mehr als 300 Produktionsstätten. Darüber hinaus verfügen wir über Bürogebäude, Lagerhäuser, Forschungs- und Entwicklungseinrichtungen oder Vertriebsstellen in nahezu allen Ländern der Erde.

Der Siemens-Konzern umfasst die Siemens AG, eine Aktiengesellschaft nach deutschem Recht, als Muttergesellschaft und insgesamt ungefähr 1.000 Gesellschaften, einschließlich Minderheitsbeteiligungen. Der Sitz unseres Unternehmens ist Deutschland, mit der Konzernzentrale in München. Der Siemens-Konzern wird durch den Vorstand geführt, dem zusätzlich zum Chief Executive Officer (CEO) und Chief Financial Officer (CFO) sowie den Leitern ausgewählter Konzernresorts auch die CEOs der drei Sektoren angehören.

Unsere Organisation ist an folgenden Grundsätzen ausgerichtet:

- > CEO-Prinzip,
- > durchgängiger Geschäftsverantwortung der Sektoren, Divisionen und Geschäftseinheiten (Business Units) sowie
- > uneingeschränkten fachlichen Weisungsrechten ausgewählter Unternehmensfunktionen – soweit rechtlich möglich.

Der Siemens-Vorstand ist das einzige Führungsgremium, das entsprechend dem deutschen Aktiengesetz die Gesamtverantwortung für die Geschäftsführung trägt. Auf allen anderen Ebenen unseres Unternehmens wird Führungsverantwortung hingegen stets Einzelpersonen zugeordnet, die eigenständig entscheiden und für ihre Aufgabenbereiche persönlich Ver-

antwortung tragen (CEO-Prinzip). Dieses Prinzip schafft klare und direkte Verantwortlichkeiten und damit kurze Entscheidungswege.

Unsere Sektoren, deren Divisionen und Geschäftseinheiten sowie die Sektorübergreifenden Geschäfte tragen als »Weltunternehmer« eine durchgängige Geschäftsverantwortung einschließlich der Ergebnisverantwortung. Ihre geschäftlichen Entscheidungen sind daher vorrangig von den regionalen Clustern und Länderorganisationen zu beachten (»Vorfahrtsregelung«). Die regionalen Einheiten (Cluster und Länderorganisationen) sind verantwortlich für das lokale Kundenbeziehungsmanagement und die Umsetzung der Geschäftsstrategien der Sektoren und Sektorübergreifenden Geschäfte sowie der Vorgaben von Unternehmensfunktionen.

Die Leiter ausgewählter Unternehmensfunktionen (unter anderem Finanzen und Controlling, Recht und Compliance, Personal sowie Supply Chain Management) haben über ihre jeweiligen Richtlinienkompetenzen sowie Kontroll- und Koordinationsaufgaben hinaus uneingeschränkte fachliche Weisungsrechte gegenüber allen Teilen des Unternehmens, soweit dies rechtlich möglich ist.

Die Unternehmensstruktur von Siemens gliedert sich unterhalb des Vorstands in drei Sektoren, zwei Sektorübergreifende Geschäfte, die die Sektor-Aktivitäten als Geschäftspartner unterstützen und gleichzeitig auch eigene Geschäfte mit externen Kunden betreiben, Sektorübergreifende Dienstleistungen, die gemeinsame Dienstleistungen für andere Siemens-Einheiten erbringen, zentrale Unternehmenseinheiten, die fachspezifische Aufgaben wahrnehmen, sowie regionale Cluster. Die Sektoren sind in Divisionen und diese wiederum in Geschäftseinheiten untergliedert.

Unsere Geschäftsaktivitäten konzentrieren sich auf die drei Sektoren Industry, Energy und Healthcare – drei unserer berichtspflichtigen Segmente. Zusätzlich zu unseren drei Sektoren haben wir noch drei weitere berichtspflichtige Segmente: Equity Investments sowie unsere zwei Sektorübergreifenden Geschäfte Siemens IT Solutions and Services und Siemens Financial Services (SFS).

Im Geschäftsjahr 2010 haben wir begonnen, die Organisationsstruktur des Sektors Healthcare mit Wirkung zum 1. Oktober 2010 wie nachfolgend beschrieben zu ändern. Die Finanz-

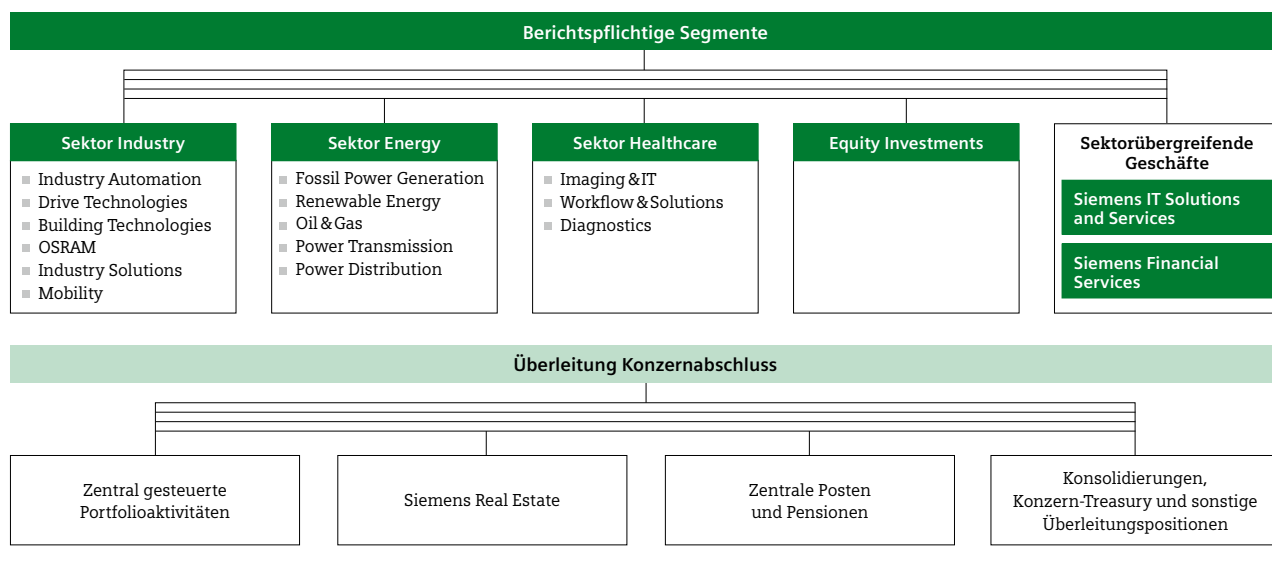

berichterstattung für das Geschäftsjahr 2010 basiert auf der bis zum 30. September 2010 gültigen Organisationsstruktur. Die Division Diagnostics ist von der Organisationsänderung nicht betroffen.

Unser Sektor **Industry** bietet ein komplettes Spektrum an Produkten, Dienstleistungen und Lösungen, mit denen sich Ressourcen und Energie effizienter nutzen und die Produktivität von Industrie und Infrastruktur steigern lassen. Mit seinen integrierten Technologien und ganzheitlichen Lösungen richtet sich der Sektor in erster Linie an Industriekunden, beispielsweise aus der Prozess- und Fertigungsindustrie, sowie Infrastrukturkunden, insbesondere aus dem Transportwesen, dem Gebäudemanagement oder dem Versorgungsbereich. Das Portfolio umfasst Produkte und Dienstleistungen für die Industrieautomatisierung und Antriebstechnik, Gebäude-, Beleuchtungs- und Transportlösungen. Systemintegration und Lösungen für das produzierende Gewerbe sind ebenfalls enthalten. Unser Sektor Industry besteht aus den sechs Divisionen Industry Automation, Drive Technologies, Building Technologies, OSRAM, Industry Solutions und Mobility. Viele der Geschäftsaktivitäten von Industry Automation und OSRAM unterliegen relativ kurzfristigen Zyklen und sind damit eher von aktuellen Konjunktorentwicklungen abhängig. Hingegen sind die langzyklischen Aktivitäten von Mobility kurzfristigen

Trends weniger stark ausgesetzt. Der Sektor Industry beschäftigt derzeit 204.000 Mitarbeiter und erwirtschaftete im Geschäftsjahr 2010 einen Außenumsatz von 33,728 Mrd. EUR. Davon entfielen 54% auf die Region Europa, Gemeinschaft Unabhängiger Staaten (GUS), Afrika, Naher und Mittlerer Osten, 24% auf die Region Amerika sowie 22% auf die Region Asien, Australien. Größter nationaler Einzelmarkt ist Deutschland mit 20% des gesamten Umsatzes des Sektors Industry im Geschäftsjahr 2010.

Unser Sektor **Energy** bietet ein weites Spektrum an Produkten, Dienstleistungen und Lösungen für das Erzeugen, Übertragen und Verteilen von elektrischer Energie sowie für das Gewinnen, Umwandeln und den Transport von Öl und Gas. Der Sektor bedient vor allem den Bedarf von Energieversorgungsunternehmen. Auch Industrieunternehmen, insbesondere der Öl- und Gasindustrie, gehören zu seinen Kunden. Der Sektor Energy deckt die gesamte Energieversorgungskette ab. Er umfasst die sechs Divisionen Fossil Power Generation, Renewable Energy, Oil & Gas, Energy Service, Power Transmission und Power Distribution. Die finanziellen Ergebnisse der Division Energy Service sind in der externen Berichterstattung in den Finanzkennzahlen der Divisionen Fossil Power Generation und Oil & Gas enthalten. Viele Geschäftsaktivitäten unseres Sektors Energy sind durch relativ langfristiges Projekt-



geschäft gekennzeichnet und daher vergleichsweise unabhängig von kurzfristigen Konjunktorentwicklungen. Der Sektor Energy beschäftigt derzeit 88.000 Mitarbeiter und erwirtschaftete im Geschäftsjahr 2010 einen Außenumsatz von 25,204 Mrd. EUR. Davon entfielen 59% auf die Region Europa, GUS, Afrika, Naher und Mittlerer Osten, 26% auf die Region Amerika sowie 15% auf die Region Asien, Australien. Die USA waren im Geschäftsjahr 2010 mit 14% des Sektor-Umsatzes größter nationaler Einzelmarkt des Sektors.

Unser Sektor **Healthcare** bietet seinen Kunden ein umfassendes Portfolio medizinischer Lösungen entlang der Wertschöpfungskette, von medizinischer Bildgebung über In-vitro-Diagnostik bis zu interventionellen Verfahren und klinischer Informationstechnologie – alles aus einer Hand. Außerdem übernimmt der Sektor technische Wartung, professionelle Dienst- und Beratungsleistungen sowie Finanzierungsleistungen für seine Kunden in Zusammenarbeit mit SFS. Bis zum 30. September 2010 setzte sich unser Sektor Healthcare aus den drei Divisionen Imaging & IT, Workflow & Solutions und Diagnostics zusammen. Im Geschäftsjahr 2010 haben wir begonnen, die Organisationsstruktur von Healthcare mit Wirkung zum 1. Oktober 2010 zu ändern. Dies führte zu Anpassungen bei den Divisionen des Sektors. Seit der Organisationsänderung besteht der Sektor aus den drei Divisionen Imaging and Therapy Systems, Clinical Products und Diagnostics. Die Division Diagnostics ist von der Organisationsänderung nicht betroffen. Die Finanzberichterstattung für das Geschäftsjahr 2010 basiert auf der bis zum 30. September 2010 gültigen Organisationsstruktur. Die Geschäftsaktivitäten des Sektors sind relativ unbeeinflusst von kurzfristigen Konjunkturtrends, hingegen aber von regulatorischen und politischen Entwicklungen abhängig, insbesondere von der Reform des Gesundheitswesens in den USA. Der Sektor Healthcare beschäftigt derzeit 49.000 Mitarbeiter und erwirtschaftete im Geschäftsjahr 2010 einen Außenumsatz von 12,280 Mrd. EUR. Davon entfielen 38% auf die Region Europa, GUS, Afrika, Naher und Mittlerer Osten, 42% auf die Region Amerika sowie 20% auf die Region Asien, Australien. Mit Abstand wichtigster nationaler Einzelmarkt von Healthcare sind die USA mit 36% des gesamten Umsatzes des Sektors im Geschäftsjahr 2010.

**Equity Investments** umfasst im Allgemeinen von Siemens gehaltene Eigenkapitalanteile, die nach der Equity-Methode zu Anschaffungskosten oder als kurzfristige zur Veräußerung verfügbare finanzielle Vermögenswerte bilanziert werden und die aus strategischen Gründen keinem Sektor, Sektorübergreifenden Geschäft sowie nicht Siemens Real Estate (SRE), Pensionen oder der Konzern-Treasury zugeordnet sind. Equity

Investments beinhaltet im Wesentlichen unseren Anteil von ungefähr 50% an Nokia Siemens Networks B.V. (NSN), unseren Anteil von 50,0% an BSH Bosch und Siemens Hausgeräte GmbH (BSH), unseren Anteil von 49,0% an Krauss-Maffei Wegmann GmbH & Co. KG (KMW), unseren Anteil von 50,0% an ELIN GmbH & Co. KG, unseren Anteil von 49,0% an Enterprise Networks Holdings B.V. (EN) sowie unseren Anteil von 19,8% an GIG Holding GmbH (vormals ARQUES Value Development GmbH).

**Siemens IT Solutions and Services** entwickelt, integriert und betreibt Informations- und Kommunikationsinfrastrukturen und bietet aus einer Hand umfassende Lösungen für die Informationstechnologie und Kommunikation – für externe Kunden wie auch für Siemens. Siemens IT Solutions and Services beschäftigt derzeit 32.000 Mitarbeiter und verzeichnete im Geschäftsjahr 2010 einen Außenumsatz von 3,150 Mrd. EUR.

**Siemens Financial Services (SFS)** ist ein internationaler Anbieter von Finanzlösungen für gewerbliche Kunden. SFS ist sowohl für Siemens als auch für externe Kunden tätig und konzentriert sich dabei auf die drei Branchen Industrie, Energie und Gesundheitswesen. SFS finanziert Infrastruktur, Equipment sowie Betriebsmittel und unterstützt und berät Siemens beim Management von finanziellen Risiken und Investments. Durch den kombinierten Einsatz seiner Finanz- und Industrieexpertise schafft SFS Wert für seine Kunden und verbessert ihre Wettbewerbsfähigkeit. SFS beschäftigt derzeit 2.000 Mitarbeiter. Zum 1. Oktober 2010 wurde Siemens Financial Services in Verbindung mit einem Antrag in Deutschland zur Erteilung einer Lizenz zur Ausübung von Bankgeschäften in Financial Services umbenannt.

Im Zusammengefassten Lagebericht berichten wir Finanzkennzahlen für unsere drei Sektoren, das Sektorübergreifende Geschäft Siemens IT Solutions and Services sowie für 14 Divisionen unserer Sektoren. Die Finanzkennzahlen umfassen: Auftragseingang, Umsatz, Ergebnis und Ergebnismarge. Für Equity Investments berichten wir im Zusammengefassten Lagebericht das Ergebnis und für SFS Ergebnis und Gesamtvermögen. Der freie Zahlungsmittelfluss (Free Cash Flow) und weitere Finanzkennzahlen werden für jedes unserer berichtspflichtigen Segmente im »Anhang zum Konzernabschluss« berichtet. Informationen zur Definition dieser Finanzkennzahlen sowie zur Überleitung von Segmentfinanzkennzahlen auf den Konzernabschluss finden sich im »Anhang zum Konzernabschluss« und auf der vorletzten Seite dieses Zusammengefassten Lageberichts.

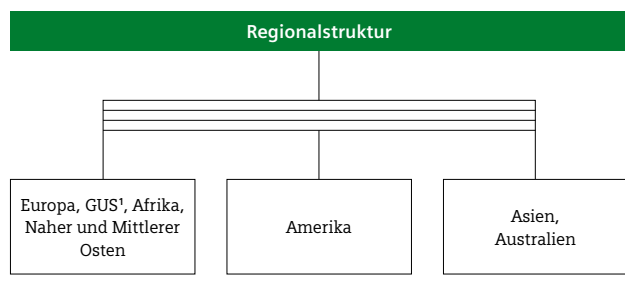

1 Gemeinschaft Unabhängiger Staaten.

Geografisch ist Siemens in 17 regionale Cluster unterteilt, die drei Berichtsregionen zugeordnet sind. Für die oben genannten drei Berichtsregionen veröffentlichen wir Finanzkennzahlen. Zusätzlich berichten wir auf Konzernebene Finanzkennzahlen für bestimmte wichtige Länder, insbesondere für Deutschland (innerhalb der Region Europa, GUS, Afrika, Naher und Mittlerer Osten), die USA (innerhalb der Region Amerika) sowie für China und Indien (innerhalb der Region Asien, Australien).

## STRATEGIE

### Die globalen Megatrends

Globale Megatrends sind langfristige Prozesse, die die globale Nachfrage in den kommenden Jahrzehnten maßgeblich beeinflussen werden. Wir bei Siemens sehen demografischen Wandel, Urbanisierung, Klimawandel sowie Globalisierung als Megatrends, die alle Menschen betreffen und die globale Entwicklung prägen werden. Darum haben wir unsere Strategie und unser Geschäft konsequent an diesen Trends ausgerichtet. In unseren drei Sektoren Industry, Energy und Healthcare haben wir wegweisende Produkte und Lösungen entwickelt, die, so glauben wir, geeignet sind, dem Klimawandel entgegenzuwirken, zur besseren Gesundheitsversorgung einer wachsenden und alternden Bevölkerung beizutragen sowie die Infrastruktur und Mobilität in urbanen Räumen energieeffizient und damit umweltverträglich zu gestalten.

Der **demografische Wandel** umfasst zwei wichtige Trends: Die Weltbevölkerung wird weiterhin schnell anwachsen und dabei älter werden. Es wird geschätzt, dass die Weltbevölkerung im Jahr 2050 die Zahl von neun Milliarden Menschen erreichen wird, im Vergleich zu etwa sieben Milliarden heute. Die Lebenserwartung wird im weltweiten Durchschnitt bis zum Jahr 2050 auf voraussichtlich 76 Jahre ansteigen, im Vergleich zu 68 Jahren heute und 46 Jahren im Jahr 1950. Zukünftige Gesundheitssysteme werden sich daher der Heraus-

forderung gegenübersehen, eine bezahlbare Gesundheitsversorgung für die gesamte Bevölkerung bereitzustellen. Siemens bietet innovative medizinische Lösungen, die dazu beitragen können, die Gesundheitskosten zu verringern und gleichzeitig die Qualität der Gesundheitsversorgung durch Vorsorge und die frühzeitige Diagnostik von Krankheiten zu erhöhen – zwei wichtige Voraussetzungen für ein längeres und gesünderes Leben.

Die **Urbanisierung** bezieht sich auf die weltweit wachsende Zahl von großen städtischen Ballungsgebieten, etablierte Großstädte in den Industrienationen ebenso wie schnell wachsende Ballungszentren in den Schwellenländern. Im Jahr 2009 lebte erstmals in der Menschheitsgeschichte mehr als die Hälfte der Weltbevölkerung in Städten. Es wird erwartet, dass diese Zahl bis zum Jahr 2050 auf 70 % ansteigen wird, analog zu dem oben beschriebenen allgemeinen Anstieg der Bevölkerung. Folglich herrscht große Nachfrage nach nachhaltiger und energieeffizienter Infrastruktur für Gebäude, Transportsysteme sowie die Energie- und Wasserversorgung. Wir glauben, dass das umfangreiche Portfolio von Siemens gut geeignet ist, die Lebensqualität in Städten zu steigern. Ferner gehen wir davon aus, dass unter anderem unsere Produkte und Lösungen für die verarbeitende Industrie, den städtischen Nahverkehr, den Bausektor, die Energieverteilung und für Krankenhäuser dazu beitragen können, Mobilität, Sicherheit und eine ausreichende Bedienung der Grundbedürfnisse des Lebens zu verbessern. Zugleich können sie helfen, die Umweltbelastung zu reduzieren.

Der **Klimawandel** ist eine Tatsache. Die durchschnittliche Temperatur der Erdoberfläche hat sich zwischen 1850 und dem Beginn des 21. Jahrhunderts um 0,76° Celsius erhöht. Dies korreliert mit dem Anstieg der Kohlendioxidkonzentration in der Atmosphäre, die heute so hoch ist wie noch nie in den vergangenen 800.000 Jahren. Die Reduzierung der Treibhausgasemissionen ist unerlässlich, um die immer drastischeren Auswirkungen auf unser Ökosystem zu vermeiden. In Zusammenhang mit Energieerzeugung und Energieverbrauch herrscht eine große Nachfrage nach innovativen Technologien, die die Effizienz steigern und Emissionen verringern helfen. Siemens ist führend bei Technologien für den Klimaschutz. Hierzu zählen beispielsweise die Erhöhung des Wirkungsgrads bei der Energieerzeugung aus fossilen Brennstoffen, die Erzeugung von Strom aus erneuerbaren Energien wie der Wind- und Solarenergie, die Verbesserung von Effizienz und Leistung der Stromnetze, die Steigerung der Energieeffizienz von Transportlösungen und Industrieprozessen, die Reduzierung des Energiebedarfs bei Gebäuden sowie die

Verringerung von Emissionen bei allen vorstehend genannten Prozessen.

**Globalisierung** bezieht sich auf die zunehmende Verflechtung der weltweiten Volkswirtschaften, der Politik, der Kulturen und weiterer Lebensbereiche. Zwischen 1950 und 2007 hat sich das Welthandelsvolumen jährlich im Durchschnitt um 6,2% erhöht. Die Zahl multinationaler Unternehmen ist weltweit von etwa 10.000 in den Jahren 1968/69 auf mehr als 80.000 im Jahr 2008 angestiegen. Darüber hinaus entwickeln sich die vier größten Schwellenländer – Brasilien, Russland, Indien und China (BRIC) – immer mehr zu bedeutenden Akteuren der Weltwirtschaft. Globalisierung führt zu steigendem Wettbewerbsdruck sowie zur Nachfrage nach wirtschaftlichen und hochqualitativen Produkten und Lösungen mit kurzen Entwicklungszyklen. Mit unseren Angeboten wollen wir die Produktivität unserer Kunden durch die Unterstützung von Prozess- und Energieeffizienzverbesserungen sowie Warenströmen erhöhen. Darüber hinaus glauben wir, dass uns unsere Präsenz in rund 190 Ländern in eine sehr gute Ausgangsposition versetzt, die uns hilft, an dem überdurchschnittlichen Wachstum der Schwellenländer zu partizipieren.

### Konzernstrategie

Unsere **Vision** ist es, Pionier zu sein in

- > Energieeffizienz,
- > industrieller Produktivität,
- > bezahlbaren und personalisierten Gesundheitssystemen sowie
- > intelligenten Infrastrukturlösungen.

Diese Vision spiegelt sich in unserer Unternehmensstrategie wider, die uns den Weg zur Verwirklichung unserer Vision weist. Basierend auf unseren Werten – **Verantwortungsvoll, Exzellent** und **Innovativ** – ist unser oberstes Ziel die Markt- und Technologieführerschaft in unseren Geschäften. Wir glauben, dass wir mit diesem Ansatz nachhaltig und profitabel wachsen und unsere Wettbewerber übertreffen können. Dabei wollen wir als integrierter Technologiekonzern von den oben beschriebenen Megatrends profitieren.

Unsere Strategie umfasst **drei strategische Stoßrichtungen**:

- > den Fokus auf innovationsgetriebene Wachstumsmärkte richten,
- > ein starker Partner unserer Kunden vor Ort sein sowie
- > die Kraft von Siemens nutzen.

Bis zum Ende des Geschäftsjahrs 2010 haben wir unsere Strategie mit dem Unternehmensprogramm Fit42010 umgesetzt. Im Rahmen von Fit42010 haben wir uns ambitionierte Ziele für Wachstum, Profitabilität, Liquidität sowie unsere Kapitalstruktur gesetzt, die wir bis zum Ende des Geschäftsjahrs 2010 erreichen wollten. Diese Ziele basierten allerdings auf normalen Konjunkturzyklen – ohne Berücksichtigung der durch die Finanzkrise ausgelösten globalen Rezession und deren Nachwirkungen auf unser Geschäft in den vergangenen beiden Geschäftsjahren. Für weiterführende Informationen zu den finanziellen Kenngrößen des Fit42010-Unternehmensprogramms siehe »– Finanzielle Steuerungsgrößen«.

Im Unternehmensprogramm Fit42010 haben wir die übergreifenden Potenziale, die Siemens als integrierter Technologiekonzern besitzt, in vier Kategorien gegliedert: Portfolio, People Excellence, Operational Excellence und Corporate Responsibility. Durch eine stringente Ressourcenallokation und die Fokussierung auf die drei Sektoren haben wir uns mit unserem **Portfolio** gezielt auf attraktive Märkte ausgerichtet. Wir liefern Kundennutzen, indem wir im Rahmen von **People Excellence** darum bemüht sind, die besten Mitarbeiter weltweit zu beschäftigen – eine Voraussetzung zur Schaffung einer Hochleistungskultur. Dabei ist Diversity im Management – die Vielfalt bei unseren Führungskräften – ein fester Bestandteil unserer Konzernstrategie und eine Grundvoraussetzung für den nachhaltigen Erfolg unseres Unternehmens. Open Innovation bedeutet für uns, unternehmerische Einheiten zu öffnen, um weltweit das Wissen vieler interner und externer Experten aus unterschiedlichen Disziplinen einzubeziehen, und trägt dazu bei, unsere Technologie kontinuierlich weiterzuentwickeln und zu verbessern. Open Innovation war unter Fit42010 Teil der Kategorie **Operational Excellence**, ebenso wie Supply Chain Management – die Steuerung unserer Versorgungskette –, das die Effizienz im Einkauf und in der Lieferkette konzernweit steigern soll. Schließlich haben wir unter **Corporate Responsibility** nicht nur ein weltweit durchgängiges Compliance-Programm mit Systemen und Prozessen für ordnungsgemäßes Handeln eingeführt, sondern haben damit auch unser gesellschaftliches Engagement und die Bedeutung unterstrichen, die wir dem Klimaschutz beimessen.

Aufbauend auf den Erfolgen von Fit42010 und vorangegangener Unternehmensprogramme gehen wir in die Zukunft. Beginnend mit dem Geschäftsjahr 2011 ist **One Siemens** unser Zielsystem zur nachhaltigen Wertsteigerung. Es schließt ein auf kapitaleffizientes Wachstum ausgerichtetes finanzielles Zielsystem und den Anspruch auf kontinuierliche Verbesserung gegenüber Markt und Wettbewerbern ein.

Wir werden uns an unseren Wettbewerbern orientieren. Diese dauerhaft zu übertreffen und selbst Maßstab für die Spitzenposition zu sein: Das ist unser Ziel und unser Anspruch. Dies gilt sowohl für unsere finanzielle Leistung als auch für unsere operative Stärke. Das finanzielle Zielsystem von One Siemens definiert finanzielle Steuerungsgrößen für Umsatzwachstum, für Kapitaleffizienz und Profitabilität sowie für die Optimierung unserer Kapitalstruktur. Darüber hinaus haben wir Mindestanforderungen definiert, die grundsätzlich vor der Durchführung von Akquisitionen berücksichtigt werden müssen. Wir haben ferner eine Kenngröße festgelegt, die auf eine attraktive Dividendenpolitik abzielt. Wir glauben, dass diese Steuerungsgrößen wichtige Treiber zur Steigerung des Unternehmenswerts sein werden. Für weiterführende Informationen siehe »– Finanzielle Steuerungsgrößen«.

Um unser Ziel einer nachhaltigen Steigerung des Unternehmenswerts von Siemens zu erreichen und unser volles Potenzial als integrierter Technologiekonzern auszuschöpfen, haben wir im Kontext der drei oben beschriebenen strategischen Stoßrichtungen jeweils drei konkrete Fokusthemen definiert. Auf sie wollen wir unser Augenmerk in den kommenden Jahren legen. Bei der strategischen Stoßrichtung **Fokus auf innovationsgetriebene Wachstumsmärkte richten** ist unser erstes Fokusthema, **Pionier in technologiegetriebenen Märkten** zu sein. Wir wollen uns auf innovations- und technologiegetriebene Wachstumsmärkte konzentrieren, die die Basis für die zukünftigen Kerngeschäfte von Siemens sein werden, beispielsweise, indem wir intelligente und nachhaltige Infrastruktur für die Städte dieser Welt bereitstellen. Unser zweites Fokusthema ist die **kontinuierliche Stärkung unserer Portfolios**. Wir steuern unser Portfolio aktiv und systematisch mit dem grundsätzlichen Ziel, an allen unseren derzeitigen und künftigen Märkten die erste oder zweite Marktposition zu erreichen oder zu halten. Ein **führendes Umweltportfolio anzubieten** ist unser drittes Fokusthema. Unser Umweltportfolio steigert nicht nur den Umsatz unseres Unternehmens, sondern es leistet zugleich auch einen maßgeblichen Beitrag zum Klimaschutz. Bis zum Ende des Geschäftsjahrs 2014 wollen wir mit unserem Umweltportfolio einen Umsatz von 40 Mrd. EUR übertreffen.

Bei der zweiten strategischen Stoßrichtung – **ein starker Partner unserer Kunden vor Ort sein** – ist eines unserer Fokusthemen, unsere **Position an den Wachstumsmärkten zu stärken** und zugleich unsere Position an unseren etablierten Märkten zu behaupten. In Zukunft wollen wir verstärkt Produkte, Lösungen und Dienstleistungen für die sehr schnell wachsenden, preissensitiveren Einstiegssegmente anbieten,

die sich besonders in den Schwellenländern finden. Es ist unser Ziel, den Anteil unseres Umsatzes aus Schwellenländern kontinuierlich auszubauen. Unser zweites Fokusthema ist der **weitere Ausbau unseres Dienstleistungsgeschäfts**, das in unserem Unternehmen hoch diversifiziert und breit gestreut ist. Wir glauben, dass uns die breite Basis installierter Produkte und Lösungen bei unseren Kunden eine vielversprechende Grundlage für Geschäfts- und Wachstumschancen bei Dienstleistungen bietet. Dienstleistungen tragen entscheidend zur Profitabilität von Siemens bei und sind zudem aufgrund von Langzeitverträgen weniger konjunkturanfällig. Die **Intensivierung unserer Kundenorientierung** und Erhöhung der Kundenzufriedenheit sind unser drittes Fokusthema. Wir glauben, dass Kundennähe und Präsenz vor Ort wichtig sind, um uns in die Lage zu versetzen, auf geänderte Marktanforderungen schnell reagieren zu können.

Bei der strategischen Stoßrichtung **die Kraft von Siemens nutzen** ist unser erstes Fokusthema, **lebenslanges Lernen und Weiterentwicklung** bei unseren Mitarbeitern zu fördern. Wir investieren kontinuierlich mit anspruchsvollen Aus- und Weiterbildungsprogrammen in die Kenntnisse und Fähigkeiten unserer Mitarbeiter. Wir fördern unsere Mitarbeiter weltweit, indem wir Talente identifizieren und ihnen herausfordernde Aufgaben bieten. **Vielfalt und Engagement unserer Mitarbeiterschaft weltweit unterstützen** ist unser zweites Fokusthema und umfasst die Stärkung von Vielfalt (Diversity). Wir glauben, dass uns das große Potenzial der Fähigkeiten, Erfahrungen und Qualifikationen unserer Mitarbeiter erhebliche Wettbewerbsvorteile an den globalen Märkten verschaffen kann. Das dritte Fokusthema heißt: **für Integrität einstehen**. Auf der Basis unserer Werte haben wir klare und verbindliche Verhaltensgrundsätze formuliert, die alle Aspekte unserer unternehmerischen Aktivitäten abdecken.

### Segment-Strategien

Unser Sektor **Industry** ist ein weltweit führender Anbieter von Produktions-, Transport-, Gebäude- und Lichttechnik. Er strebt an, die Wettbewerbsfähigkeit seiner Kunden durch die Automatisierung des gesamten Lebenszyklus der Kundeninvestitionen zu steigern. Seine innovativen und umweltfreundlichen Produkte, Systeme, Dienstleistungen und Lösungen sind speziell auf die Erhöhung von Produktivität und Flexibilität sowie die Verbesserung von Ressourcen- und Energieeffizienz beim Kunden ausgerichtet. Der Sektor baut auf gemeinsame Technologieplattformen (zum Beispiel *Totally Integrated Automation – TIA*), die von den Divisionen in branchenspezifischen Anwendungen umgesetzt werden und diesen erlauben sollen, überdurchschnittlich profitabel zu wachsen.

Wir glauben, dass unser Sektor **Energy** das weltweit einzige Unternehmen ist, das die Effizienz entlang der gesamten Energieumwandlungskette steigern kann: von der Öl- und Gasförderung über die Erzeugung bis hin zur Übertragung und Verteilung elektrischer Energie. Als integriertes Technologieunternehmen nimmt der Sektor in seiner Branche eine technologische Spitzenposition ein und setzt Industriestandards. Unser Sektor Energy hat den Anspruch, durch überdurchschnittliches, profitables Wachstum in jedem einzelnen Geschäftsfeld eine führende Marktposition einzunehmen.

Die Strategie unseres Sektors **Healthcare** zielt auf eine Effizienzsteigerung im Gesundheitswesen durch eine Erhöhung der Qualität in der Gesundheitsversorgung bei gleichzeitiger Senkung der Kosten. Durch konsequente Kundenorientierung und Konzentration auf die Marktnachfrage strebt der Sektor den stetigen Ausbau seiner Marktposition an. Unterstützt wird dies durch die Implementierung einer daran ausgerichteten Innovationsstrategie bei seinen Produkten, Dienstleistungen und Lösungen sowie durch die kontinuierliche Verbesserung seiner Kostenposition. Unser Sektor Healthcare arbeitet daran, seine Präsenz an den zukünftigen Wachstumsmärkten zu verstärken, die durch eine engere Integration von Diagnostik und Therapie sowie eine steigende Nachfrage nach effizienter Gesundheitsversorgung in Schwellenländern gekennzeichnet sind. Mit seinem integrierten Ansatz, der medizinische Bildgebung und Therapiesysteme, Labordiagnostik und IT-Systeme im Gesundheitswesen miteinander vereint, adressiert der Sektor die komplette medizinische Versorgungskette – von der Prävention und Früherkennung über die Diagnose bis zur Therapie und Nachsorge.

Als ein führender europäischer IT-Dienstleister bietet **Siemens IT Solutions and Services** Fachkompetenz in der Informationstechnologie und liefert ganzheitliche, branchenorientierte IT-Lösungen durch die Einbindung der Technologie und Fähigkeiten von Siemens. Das Portfolio reicht von Beratung, Softwareentwicklung und Softwareeinsatz über die Systemintegration bis hin zum kompletten Management von IT-Infrastrukturen. Siemens IT Solutions and Services versteht das Geschäft und die Kernprozesse seiner Kunden. Darüber hinaus ermöglicht es seine ausgeprägte Innovationskultur, Innovationen mit messbarem Kundennutzen zu schaffen. Siemens IT Solutions and Services ist ein verlässlicher und nachhaltiger Partner bei der Umsetzung von Geschäftsprozessen. Im Geschäftsjahr 2010 haben wir eine strategische Neuausrichtung von Siemens IT Solutions and Services begonnen, die da-

rauf abzielt, die Wettbewerbsfähigkeit dieses Geschäfts in Vorbereitung von dessen operativer Eigenständigkeit zu stärken. Hierzu gehören die Neuausrichtung der Lösungs-, Outsourcing- und Softwareaktivitäten. Seine Stellung als rechtlich eigenständige operative Gesellschaft innerhalb des Siemens-Konzerns ab dem 1. Oktober 2010 gibt Siemens IT Solutions and Services zusammen mit seiner schlankeren Organisationsstruktur und vereinfachten Prozessen größere Flexibilität, um der Dynamik des IT-Dienstleistungsmarkts gerecht zu werden.

Die Strategie von **SFS** beruht auf drei Säulen: dem Management der finanziellen Risiken von Siemens, der Unterstützung der Geschäftsaktivitäten unseres Konzerns durch die Bereitstellung spezifischer Finanzlösungen für Siemens-Kunden sowie auf Finanzierungen für andere Unternehmen. Schwerpunktmäßig umfasst dies die drei Branchen Industrie, Energie und das Gesundheitswesen. Durch die Verbindung von Finanzexpertise und Industriekompetenz schafft SFS Wert für seine Kunden und verbessert deren Wettbewerbsfähigkeit.

#### **Wichtige Unternehmensprogramme und Initiativen** **Programm zur Reduzierung** **der gesellschaftsrechtlichen Beteiligungen**

Um die Komplexität innerhalb unserer Konzernstruktur zu reduzieren, Synergien zu optimieren sowie Kontrolle und Transparenz zu erhöhen, hatten wir ein Programm mit dem Ziel gestartet, die Anzahl unserer gesellschaftsrechtlichen Einheiten zu verringern. Denn durch die signifikanten M&A-Aktivitäten, mit denen wir in den vergangenen Jahren unser Portfolio weiterentwickelt und optimiert haben, hatte sich die Zahl der gesellschaftsrechtlichen Einheiten zuvor deutlich erhöht.

Bereinigt um die kürzlich neu gegründeten Gesellschaften in Zusammenhang mit der rechtlichen Ausgliederung von Siemens IT Solutions and Services sowie um gesellschaftsrechtliche Einheiten, die veräußert, liquidiert oder fusioniert werden sollen und für die Siemens alle unter seiner Kontrolle stehenden Aktivitäten für die Veräußerung, Liquidation oder Fusion bereits abgeschlossen hat, haben wir zum Ende des aktuellen Geschäftsjahrs unser Ziel erreicht, bis 2010 die Zahl unserer gesellschaftsrechtlichen Einheiten, einschließlich nicht beherrschender Anteile, auf unter 1.000 zu verringern. Zum Vergleich betrug die Zahl unserer gesellschaftsrechtlichen Einheiten zum Ende des Vorjahrs etwa 1.300, etwa 1.600 zum Geschäftsjahresende 2008 sowie etwa 1.800 zum Geschäftsjahresende 2007. Die Reduzierung wurde überwiegend durch die



Integration von Gesellschaften in bestehende Siemens-Regionalgesellschaften erreicht. Zusätzlich trugen auch Portfolio-bereinigungen dazu bei, dieses Ziel zu erreichen.

### Programm zur Bündelung der Immobilienaktivitäten

Im Geschäftsjahr 2009 begann Siemens damit, ein mehrjähriges Programm umzusetzen, das die Effizienz des Immobilienmanagements verbessern soll. Die Laufzeit ist bis zum Jahr 2014 geplant. Unter diesem Programm bündelt Siemens sein gesamtes Immobilienportfolio bei Siemens Real Estate (SRE) und implementiert weitere Maßnahmen, um die Effizienz des gebündelten Portfolios bei SRE zu erhöhen. Wir erwarten, dass das Programm durch effizientere Nutzung der Flächen und eine Reduzierung des Leerstands jährliche Kosteneinsparungen in Höhe von ungefähr 250 Mio. EUR ab Ende des Geschäftsjahrs 2011 und jährliche Kosteneinsparungen in Höhe von ungefähr 400 Mio. EUR ab Ende des Geschäftsjahrs 2014 für die Sektoren und Sektorübergreifenden Geschäfte von Siemens generieren wird. Im Vergleich zur Kostenposition vor Beginn des Programms konnten zum Ende des Geschäftsjahrs 2010 bereits jährliche Kosteneinsparungen in Höhe von etwa 190 Mio. EUR für die Sektoren und Sektorübergreifenden Geschäfte von Siemens erreicht werden. Während der Umsetzung des Programms zur Bündelung der Immobilienaktivitäten fallen Aufwendungen in Zusammenhang mit der Reduzierung von Leerständen und der Konsolidierung von Standorten an, in erster Linie bei SRE. Für weitere Informationen siehe »Ertragslage – Segmentinformationen – Überleitung Konzernabschluss – Siemens Real Estate«.

### FINANZIELLE STEUERUNGSGRÖSSEN

Der Abschnitt »Finanzielle Steuerungsgrößen« enthält verschiedene Kenngrößen, die sogenannte Non-GAAP-Kennzahlen sind oder sein können. Für weitere Informationen zu diesen Kennzahlen siehe »Weitere Informationen zu zusätzlichen Finanzkennzahlen« sowie die vorletzte Seite dieses Zusammengefassten Lageberichts.

Andere Unternehmen, die Finanzkennzahlen mit einer ähnlichen Bezeichnung berichten oder darstellen, können diese anders berechnen.

### Fit42010-Programm

Im Geschäftsjahr 2007 haben wir unser Fit42010-Unternehmensprogramm aufgelegt und dies bis zum Ende des Geschäftsjahrs 2010 fortgeführt. Beginnend mit dem Geschäfts-

jahr 2011, wird One Siemens unser Zielsystem für kapitaleffizientes Wachstum und nachhaltige Wertsteigerung bilden. Für weiterführende Informationen siehe »– Strategie – Konzernstrategie«.

Unser Fit42010-Unternehmensprogramm beinhaltet finanzielle Steuerungsgrößen in Bezug auf Wachstum, Profitabilität, Kapitaleffizienz, Umsetzung von Ergebnis in Zahlungsmittel (*Cash Conversion*) und die Optimierung unserer Kapitalstruktur. Diese Kennzahlen wurden ausgewählt, um uns bei der Entwicklung unseres Unternehmenswerts und unserer Wettbewerbsfähigkeit zu unterstützen und um dazu beizutragen, unsere Spitzenpositionen zu festigen beziehungsweise zur Leistungsstärke unserer Wettbewerber aufzuschließen. Wir hatten uns ambitionierte Ziele für alle unsere finanziellen Steuerungsgrößen gesetzt, die wir bis zum Ende des Geschäftsjahrs 2010 erreichen wollten. Diese Ziele basierten jedoch auf normalen Konjunkturzyklen – ohne die Berücksichtigung der durch die Finanzkrise ausgelösten globalen Rezession und deren Nachwirkungen auf unser Geschäft in den vergangenen beiden Geschäftsjahren. Unsere Fähigkeit, diese Ziele im laufenden Geschäftsjahr zu erreichen, wurde darüber hinaus von den im vierten Quartal gebuchten Wertminderungen vor Steuern in Höhe von 1,204 Mrd. EUR in unserem Diagnostikgeschäft sowie Vorsteuerbelastungen in Höhe von 460 Mio. EUR in Verbindung mit der strategischen Neuausrichtung von Siemens IT Solutions and Services beeinträchtigt. Zum Vergleich wurde die Vorjahresperiode durch Wertminderungen vor Steuern in Höhe von 1,850 Mrd. EUR in Zusammenhang mit NSN beeinflusst.

### Operative Steuerungsgrößen

Die erste operative Fit42010-Steuerungsgröße konzentrierte sich auf Wachstum und sollte damit sicherstellen, dass eine für ein entsprechendes Ergebniswachstum ausreichende Umsatzentwicklung erwirtschaftet wird. Unser Ziel war es, dass unser Umsatz auf organischer Basis, also bereinigt um Währungsumrechnungs- und Portfolioeffekte, doppelt so stark wächst wie das Welt-Bruttoinlandsprodukt (BIP). Im Geschäftsjahr 2010 sank der Umsatz auf organischer Basis um 3% im Vergleich zur Vorjahresperiode. IHS Global Insight erwartet für das Kalenderjahr 2010 eine Zunahme des realen globalen BIP um 3,8%. Über den gesamten Zeitraum unseres Fit42010-Programms erreichten wir ein durchschnittliches jährliches organisches Umsatzwachstum von 4%. Dies ist doppelt so hoch wie das von IHS Global Insight für diesen Zeitraum berichtete Wachstum des realen globalen BIP.

## Umsatzwachstum<sup>1</sup>

$$\left[ \frac{\text{Umsatz Berichtsperiode}}{\text{Umsatz Vorjahresperiode}} - 1 \right] \times 100\%$$

|         |      |  |
|---------|------|--|
| GJ 2010 | - 3% |  |
| GJ 2009 | 0%   |  |

<sup>1</sup> Bereinigt um Währungsumrechnungs- und Portfolioeffekte.

Unsere primäre Kenngröße zur Umwandlung von Umsatz in Ergebnis unter Fit42010 war die Ergebnismarge. Sie wurde auf der Ebene der Sektoren, Divisionen und Sektorübergreifenden Geschäfte gemessen und berichtet. Für unsere Sektoren, Divisionen und Siemens IT Solutions and Services berechnete sich die Ergebnismarge als Quotient aus Ergebnis und Umsatz. Mit der nachfolgend beschriebenen Ausnahme wurde dabei das Ergebnis für diese Geschäftseinheiten konsistent mit der Segmentkennzahl für die Profitabilität im »Anhang zum Konzernabschluss« definiert, das heißt, als Ergebnis vor Finanzierungszinsen, bestimmten Pensionsaufwendungen und Ertragsteuern sowie gegebenenfalls bereinigt um weitere Sachverhalte, die nicht diesen Geschäften zugeordnet werden, da sie der Vorstand als nicht indikativ für deren Performance erachtet. Das Ergebnis der Division Diagnostics sowie des Sektors Healthcare wurde für den Vergleich mit den Margenzielbändern um Effekte aus der Kaufpreisallokation (*Purchase-Price-Allocation*-[PPA-]Effekte) und Integrationskosten bereinigt.

Im Gegensatz dazu – und im Einklang mit den üblichen Kenngrößen im Finanzdienstleistungsbereich – wurde die Eigenkapitalrendite (*Return on Equity, ROE*) als Fit42010-Kenngröße für die Kapitaleffizienz von SFS herangezogen. Diese Kenngröße ist als Quotient aus Ergebnis vor Ertragsteuern (also der Segmentkennzahl für die Profitabilität von SFS) und dem durchschnittlich zugeordneten Eigenkapital von SFS definiert.

Unsere Fit42010-Zielbänder für die Ergebnismargen sowie die erreichte Performance unserer Sektoren, Divisionen und Sektorübergreifenden Geschäfte für das Geschäftsjahr 2010 sind im Folgenden dargestellt. Die oben genannten Wertminderungen in Zusammenhang mit Diagnostics verringerten die Ergebnismarge des Sektors Healthcare im aktuellen Geschäftsjahr um 9,7 Prozentpunkte und die Ergebnismarge der Division Diagnostics um 32,8 Prozentpunkte.

## Ergebnismargen GJ 2010

$$\frac{\text{Ergebnis}}{\text{Umsatz}} \times 100\%$$

|                                               | Marge         |  | Zielband        |
|-----------------------------------------------|---------------|--|-----------------|
| <b>Industry</b>                               | <b>10,0%</b>  |  | <b>9 – 13%</b>  |
| Industry Automation                           | 16,8%         |  | 12 – 17%        |
| Drive Technologies                            | 12,3%         |  | 11 – 16%        |
| Building Technologies                         | 6,6%          |  | 7 – 10%         |
| OSRAM                                         | 12,2%         |  | 10 – 12%        |
| Industry Solutions                            | 0,7%          |  | 5 – 7%          |
| Mobility                                      | 7,9%          |  | 5 – 7%          |
| <b>Energy</b>                                 | <b>14,0%</b>  |  | <b>11 – 15%</b> |
| Fossil Power Generation                       | 15,9%         |  | 11 – 15%        |
| Renewable Energy                              | 11,3%         |  | 12 – 16%        |
| Oil & Gas                                     | 11,7%         |  | 10 – 14%        |
| Power Transmission                            | 12,4%         |  | 10 – 14%        |
| Power Distribution                            | 13,9%         |  | 11 – 15%        |
| <b>Healthcare<sup>1,2</sup></b>               | <b>7,5%</b>   |  | <b>14 – 17%</b> |
| Imaging & IT                                  | 19,6%         |  | 14 – 17%        |
| Workflow & Solutions                          | 1,8%          |  | 11 – 14%        |
| Diagnostics <sup>1,2</sup>                    | -16,3%        |  | 16 – 19%        |
| <b>Siemens IT Solutions and Services</b>      | <b>-12,9%</b> |  | <b>5 – 7%</b>   |
| <b>Siemens Financial Services<sup>3</sup></b> | <b>30,4%</b>  |  | <b>20 – 23%</b> |

### Zielbänder

- Die Ergebnismarge mit Effekten aus der Kaufpreisallokation (PPA-Effekte) beträgt für Healthcare 6,1% und für Diagnostics - 21,2%.
- Die Wertminderungen in Zusammenhang mit Diagnostics verringerten die Ergebnismarge des Sektors Healthcare um 9,7 Prozentpunkte und die Ergebnismarge der Division Diagnostics um 32,8 Prozentpunkte.
- Eigenkapitalrendite (Return on Equity).

Unsere Fit42010-Steuerungsgröße für Kapitaleffizienz war die Kapitalrendite (*Return on Capital Employed, ROCE*). Diese Kennzahl bewertet unser erzieltes Ergebnis aus Sicht unserer Aktionäre und Kreditgeber, die uns ihr Kapital zur Verfügung stellen. Siemens' gewichtete durchschnittliche Kapitalkosten (*Weighted Average Cost of Capital, WACC*) werden derzeit auf etwa 7,5% geschätzt.

### Kapitalrendite (ROCE) (fortgeführte Aktivitäten)

$$\frac{\text{Ergebnis aus fortgeführten Aktivitäten (vor Zinsen)}}{\text{Durchschnittlich eingesetztes Kapital}^1} \times 100\%$$

|                      |       |  |
|----------------------|-------|--|
| GJ 2010 <sup>2</sup> | 10,4% |  |
| GJ 2009 <sup>3</sup> | 6,1%  |  |

Zielkorridor: 14 – 16%

- 1 Bereinigt um Saldo aus Zur Veräußerung bestimmte Vermögenswerte und Zur Veräußerung bestimmte Verbindlichkeiten, soweit diese zu den nicht fortgeführten Aktivitäten gehören.
- 2 In Summe verringerten die Wertminderungen in Zusammenhang mit Diagnostics sowie die Belastungen in Verbindung mit der strategischen Neuausrichtung von Siemens IT Solutions and Services ROCE im Geschäftsjahr 2010 um 3,6 Prozentpunkte.
- 3 Die Wertminderungen in Zusammenhang mit NSN verringerten ROCE im Geschäftsjahr 2009 um 4,6 Prozentpunkte.

ROCE unter Fit42010 wurde definiert als der Gewinn aus fortgeführten Aktivitäten (vor Zinsen), geteilt durch das durchschnittlich eingesetzte Kapital. Für weitere Informationen siehe »Weitere Informationen zu zusätzlichen Finanzkennzahlen«. Unser Fit42010-ROCE-Zielband lag bei 14 bis 16%. Im Geschäftsjahr 2010 belief sich ROCE auf 10,4%. In Summe verringerten die oben genannten Wertminderungen in Zusammenhang mit Diagnostics sowie die oben genannten Belastungen in Verbindung mit der strategischen Neuausrichtung von Siemens IT Solutions and Services ROCE im Geschäftsjahr 2010 um 3,6 Prozentpunkte. Zum Vergleich verringerten die oben genannten Wertminderungen in Zusammenhang mit NSN ROCE im Geschäftsjahr 2009 um 4,6 Prozentpunkte.

Die Cash Conversion Rate war unsere Kenngröße zur Steuerung der Liquidität in unserem Fit42010-Unternehmensprogramm. Sie hat uns gezeigt, welcher Teil unseres Ergebnisses in Free Cash Flow, also freien Zahlungsmittelzufluss, umgewandelt wird. Die Berechnung der Cash Conversion Rate ist unten abgebildet. Der im »Anhang zum Konzernabschluss« dargestellte Free Cash Flow ist definiert als Mittelzu-/abfluss aus laufender Geschäftstätigkeit (fortgeführte Aktivitäten), abzüglich Investitionen in Immaterielle Vermögenswerte und Sachanlagen (fortgeführte Aktivitäten). Unser Ziel für die Cash Conversion Rate lag bei 1, abzüglich der jährlichen Umsatzwachstumsrate auf organischer Basis. Unsere Cash Conversion Rate belief sich im Geschäftsjahr 2010 auf 1,73 und lag damit über dem Zielwert von 1,03. In Summe haben die oben genannten Wertminderungen in Zusammenhang mit Diagnostics sowie die oben genannten Belastungen in Verbindung

mit der strategischen Neuausrichtung von Siemens IT Solutions and Services die Cash Conversion Rate im Geschäftsjahr 2010 um 0,44 erhöht. Zum Vergleich haben die oben genannten Wertminderungen in Zusammenhang mit NSN die Cash Conversion Rate im Geschäftsjahr 2009 um 0,66 erhöht. Über den gesamten Zeitraum unseres Fit42010-Programms erreichten wir eine Cash Conversion Rate von 1,50. Unter Berücksichtigung des durchschnittlichen jährlichen organischen Umsatzwachstums von 4% lag unser Zielwert für die Cash Conversion Rate bei 0,96 für diesen Zeitraum.

### Cash Conversion Rate (fortgeführte Aktivitäten)

$$\frac{\text{Free Cash Flow aus fortgeführten Aktivitäten}}{\text{Gewinn/Verlust aus fortgeführten Aktivitäten}}$$

|                      |      |  |
|----------------------|------|--|
| GJ 2010 <sup>1</sup> | 1,73 |  |
| GJ 2009 <sup>2</sup> | 1,54 |  |

**Ziel: 1 minus Umsatzwachstumsrate**

- 1 In Summe erhöhten die Wertminderungen in Zusammenhang mit Diagnostics sowie die Belastungen in Verbindung mit der strategischen Neuausrichtung von Siemens IT Solutions and Services die Cash Conversion Rate im Geschäftsjahr 2010 um 0,44.
- 2 Die Wertminderungen in Zusammenhang mit NSN erhöhten die Cash Conversion Rate im Geschäftsjahr 2009 um 0,66.

### Steuerung der Kapitalstruktur

Als Bestandteil des Fit42010-Unternehmensprogramms haben wir als Ergänzung unserer operativen Steuerungsgrößen auch eine Kenngröße definiert, um die Steuerung unserer Kapitalstruktur zu bewerten. Für uns ist es in diesem Zusammenhang wichtig, sowohl den breiten Kapitalmarktzugang zu verschiedenen Fremdfinanzierungsmitteln als auch die Bedienung der Finanzschulden sicherzustellen.

### Kapitalstruktur (fortgeführte Aktivitäten)

$$\frac{\text{Angepasste industrielle Nettoverschuldung}}{\text{Angepasstes EBITDA}}$$

|         |      |  |
|---------|------|--|
| GJ 2010 | 0,08 |  |
| GJ 2009 | 0,31 |  |

Zielkorridor: 0,8 – 1,0

Im Rahmen des Fit42010-Unternehmensprogramms definieren wir unsere Kapitalstruktur-Kennzahl als Quotient aus angepasster industrieller Nettoverschuldung und angepasstem EBITDA. Für weiterführende Informationen zu dieser Berechnung und den jeweiligen Bestandteilen dieser Größen siehe »Finanzlage – Kapitalstruktur« und »Weitere Informationen zu zusätzlichen Finanzkennzahlen«. Unser Ziel war es, für diesen Quotienten in einer Bandbreite von 0,8 bis 1,0 zu liegen. Allerdings haben wir uns angesichts der Weltwirtschaftskrise bewusst dafür entschieden, unsere Kapitalstruktur nicht, wie ursprünglich geplant, in Richtung einer höheren Verschuldung anzupassen. Die Kennziffer für unsere Kapitalstruktur belief sich für das Geschäftsjahr 2010 auf 0,08.

### One Siemens

Mit dem Geschäftsjahr 2011 haben wir **One Siemens** – unser **Zielsystem zur nachhaltigen Wertsteigerung** – eingeführt (für weiterführende Informationen siehe »Strategie – Konzernstrategie«). Als Bestandteil von One Siemens haben wir ein auf kapitaleffizientes Wachstum ausgerichtetes finanzielles Zielsystem entwickelt, das nach unserer Ansicht den Wert unseres Unternehmens steigern wird. Unser Ziel ist es, uns kontinuierlich gegenüber Markt und Wettbewerbern zu verbessern. Das finanzielle Zielsystem von One Siemens definiert Steuerungsgrößen für Umsatzwachstum, für Kapitaleffizienz und Profitabilität, für die Optimierung unserer Kapitalstruktur sowie für unsere Dividendenpolitik. Darüber hinaus haben wir Mindestanforderungen definiert, die grundsätzlich vor der Durchführung von Akquisitionen berücksichtigt werden müssen.

### Umsatzwachstum

Wir glauben, dass profitables **Umsatzwachstum** ein wichtiger Faktor bei der langfristigen Steigerung unseres Unternehmenswerts ist. Insbesondere streben wir dabei an, mit unserem Umsatzwachstum das durchschnittliche Umsatzwachstum unserer wichtigsten Wettbewerber zu übertreffen. Zum Zweck des Vergleichs mit dem Umsatzwachstum unserer Wettbewerber berechnet sich unser Umsatzwachstum als die Wachstumsrate des berichteten Umsatzes (wie im »Konzernabschluss« dargestellt) über einen rollierenden Zeitraum von zwölf Monaten im Vergleich zur entsprechenden Vorjahresperiode.

### Kapitaleffizienz und Profitabilität

Unser Ziel ist es, profitabel und so effizient wie möglich mit dem Kapital unserer Aktionäre und Kreditgeber zu arbeiten. Bisher haben wir unsere Kapitaleffizienz anhand der Steuerungsgröße ROCE überwacht. Im Rahmen von One Siemens führen wir eine weiterentwickelte finanzielle Steuerungsgröße ein: **ROCE (angepasst)**, der auf fortgeführter Basis berichtet wird. Die Anpassung des ROCE erfolgt in erster Linie mit dem Ziel, die Unterdeckung der Pensionsverpflichtungen als Finanzierungsaktivität zu berücksichtigen, die Vergleichbarkeit dieser Kennzahl mit den Wettbewerbern zu erhöhen, insbesondere in Bezug auf das Finanzgeschäft, und die Definition mit unserer Definition der angepassten industriellen Nettoverschuldung in Einklang zu bringen. Für Informationen zur Berechnung von ROCE (angepasst), siehe »Weitere Informationen zu zusätzlichen Finanzkennzahlen«. Unser Zielband für ROCE (angepasst) liegt bei 15 bis 20 %. Zum Vergleich lag unser ROCE (angepasst) auf Basis berichteter Werte im Geschäftsjahr 2010 bei 13,0% und im Geschäftsjahr 2009 bei 7,9%.

Im Einklang mit den üblichen Steuerungsgrößen im Finanzdienstleistungsbereich wird **ROE (nach Steuern)** unsere weiterentwickelte finanzielle Steuerungsgröße zur Bewertung der Kapitaleffizienz bei SFS. Beginnend mit dem Geschäftsjahr 2011, werden wir ROE (nach Steuern) als Quotient aus dem Ergebnis der SFS nach Steuern (zum Zweck der Zwischenberichterstattung auf das Jahr hochgerechnet) und dem durchschnittlich zugeordneten Eigenkapital von SFS berechnen. Steuern werden auf der Grundlage eines Pauschalsteuersatzes von 30 % auf das Ergebnis von SFS, abzüglich des SFS zugeordneten Ergebnisses aus nach der Equity-Methode bilanzierten Beteiligungen sowie steuerfreier Ergebnisbestandteile, berechnet. Unser Zielband für ROE (nach Steuern) bei SFS liegt bei 15 bis 20 %.

Wir wollen die Profitabilität unserer Geschäftsaktivitäten erhalten und weiter erhöhen. Unser Ziel sind Margen auf dem Niveau der besten Wettbewerber in unseren Branchen – über den gesamten Konjunkturzyklus hinweg. Unsere angepassten EBITDA-Margen werden als Quotient aus angepasstem EBITDA (wie in »Ertragslage – Überleitung auf angepasstes EBITDA« dargestellt) und Umsatz (wie im »Anhang zum Konzernabschluss« dargestellt) definiert. Wir haben angepasste EBITDA-Margenbänder für die jeweiligen Branchen unserer drei Sektoren festgelegt. Diese Margenbänder liegen bei 10 bis 15 % für die Branchen, in denen unsere Sektoren Industry und Energy tätig sind, und bei 15 bis 20 % für die Gesundheitsbranche. Mit Beginn des Geschäftsjahrs 2011 werden zentrale Infrastrukturkosten primär auf die Sektoren umgegliedert und dadurch unsere angepassten EBITDA-Margen beeinflussen (für weiterführende Informationen siehe »Anhang zum Konzernabschluss«).

6 An die Aktionäre

## Kapitalstruktur

Nachhaltige Ergebnisse und Umsatzerlöse sind nur auf der Basis einer gesunden Kapitalstruktur möglich. Daher werden wir weiterhin unsere Fit42010-Kennzahl zur Optimierung unserer Kapitalstruktur nutzen, die als Quotient aus angepasster industrieller Nettoverschuldung und angepasstem EBITDA definiert ist. Im Rahmen von One Siemens haben wir unsere Fit42010-Definition für die angepasste industrielle Nettoverschuldung weiterentwickelt. Die Berechnung der angepassten industriellen Nettoverschuldung wird zukünftig eine Anpassung für Pensionen und ähnliche Verpflichtungen (wie im »Anhang zum Konzernabschluss« dargestellt) beinhalten, um unsere gesamten Pensionsverpflichtungen zu berücksichtigen. Dementsprechend werden nicht mehr nur Anpassungen für den Finanzierungsstatus wesentlicher Pensionszusagen und den Finanzierungsstatus wesentlicher pensionsähnlicher Verpflichtungen vorgenommen, die nur eine Teilmenge unserer gesamten Pensionsverpflichtungen darstellten. Für weitere Informationen zur Berechnung siehe »Weitere Informationen zu zusätzlichen Finanzkennzahlen«. Unser künftiges Ziel ist es, für diesen Quotienten in einer Bandbreite von 0,5 bis 1,0 zu liegen. Zum Vergleich lag unsere One-Siemens-Kennzahl für die Kapitalstruktur im Geschäftsjahr 2010 bei 0,22 und im Geschäftsjahr 2009 bei 0,45.

## Dividendenpolitik

Mit One Siemens wollen wir unseren Investoren attraktive Dividendenausschüttungen bieten. Wir haben uns daher ein Ziel für unsere Dividendenausschüttungsquote gesetzt, die als Quotient aus dem Gesamtausschüttungsbetrag und dem Gewinn nach Steuern (wie im »Konzernabschluss« dargestellt) definiert ist. Für die Zukunft streben wir an, unseren Aktionären eine jährliche Dividendenausschüttungsquote in Höhe von 30 bis 50% des Gewinns nach Steuern vorzuschlagen. Die Berechnung dieser Quote wird außergewöhnliche zahlungsunwirksame Effekte im Ergebnis berücksichtigen. Wir beabsichtigen, die Dividendenausschüttung aus unserem erwirtschafteten Free Cash Flow zu zahlen.

## Zusätzliche Steuerungsgrößen

Zusätzlich zu den oben diskutierten finanziellen Kenngrößen verwenden wir noch verschiedene andere Kennzahlen, mit denen wir den wirtschaftlichen Erfolg unserer Geschäftsaktivitäten messen. Um abzuschätzen, ob eine bestimmte Investition eine Wertschöpfung für Siemens generieren wird, betrachten wir den Kapitalwert oder den Geschäftswertbeitrag dieser Investition. Der Geschäftswertbeitrag bezieht die Kapitalkosten in die Ermittlung der Wertschöpfung mit ein, indem er die erwarteten Ergebnisse aus der Investition den Kosten

des dabei eingesetzten Kapitals gegenüberstellt. Der Geschäftswertbeitrag wird außerdem als Indikator für die Bemessung der Kapitaleffizienz in unseren Sektoren und Sektorübergreifenden Geschäften herangezogen werden. Im Rahmen unserer Liquiditätssteuerung analysieren wir darüber hinaus sowohl die Umschlagfaktoren des Nettoumlaufvermögens (*Net Working Capital*) unserer laufenden Geschäftstätigkeit als auch die Investitionsrate, definiert als Quotient aus Investitionen in Immaterielle Vermögenswerte und Sachanlagen und Abschreibungen. Für unsere Investitionsrate haben wir uns eine Zielbandbreite von 95 bis 115% gesetzt (für weiterführende Informationen siehe »Finanzlage – Finanzausstattung und Kapitalerfordernisse«). Darüber hinaus haben wir Mindestanforderungen definiert, die grundsätzlich vor der Durchführung von Akquisitionen berücksichtigt werden müssen. Grundsätzlich sollen Akquisitionen innerhalb von zwei Jahren nach Abschluss der Transaktion einen positiven Geschäftswertbeitrag leisten und innerhalb von drei Jahren nach Abschluss der Transaktion in Einklang mit unserem Zielwert für ROCE (angepasst) stehen.

## WERTSCHÖPFUNGSKETTE

### Forschung und Entwicklung

Im Geschäftsjahr 2010 haben wir folgende Forschungs- und Entwicklungs-(FuE-)Schwerpunkte beibehalten: (1) das Bewahren der langfristigen Zukunftssicherheit, (2) die Steigerung der technologischen Wettbewerbsfähigkeit und (3) die Optimierung der FuE-Ressourcenallokation.

Ein intelligentes Innovationsmanagement trug dazu bei, im Jahr 2010 neue Schlüsseltechnologien zu entwickeln und wichtige Innovationen zur Marktreife zu bringen. Beispiele für erfolgreiche Innovationen des Siemens-Umweltportfolios im Geschäftsjahr 2010 sind die erste Anlage zur Hochspannungs-Gleichstromübertragung (HGÜ) mit einer Übertragungsspannung von 800 kV und die neueste Gasturbinen-Generation. Die HGÜ verbindet über eine Entfernung von 1.400 Kilometern Wasserkraftwerke in der chinesischen Provinz Yunnan mit dem hochindustrialisierten Gebiet im Perflussdelta – sie bringt die umweltfreundliche Energie dank der Gleichstromübertragung auf Ultrahochspannungs-Niveau mit minimalen Übertragungsverlusten zu Millionen Kunden. In den USA gelang zudem der Markteintritt der neuesten Gasturbinen-Generation, die in Verbindung mit Dampfturbinen eine bislang unerreichte Effizienz von über 60 Prozent erreichen wird – diese Technologie hilft dem Energieversorger Florida Power & Light, den Kraftstoffverbrauch in seinen Kraftwerken um ein Drittel zu reduzieren.



Unser Ziel ist es, unsere Innovationskraft weiter zu stärken. Im Geschäftsjahr 2010 investierte Siemens 3,846 Mrd. EUR für FuE. Ungeachtet der Wirtschafts- und Finanzkrise war die Forschungs- und Entwicklungsintensität auf demselben Niveau wie im Geschäftsjahr 2009 und lag über der des Geschäftsjahrs 2008.

| FuE-Intensität |       |                                                  |                                                     |
|----------------|-------|--------------------------------------------------|-----------------------------------------------------|
|                |       | Forschungs- und Entwicklungskosten (in Mrd. EUR) | Forschungs- und Entwicklungsintensität <sup>1</sup> |
| GJ 2010        | 3,846 |                                                  | 5,1%                                                |
| GJ 2009        | 3,900 |                                                  | 5,1%                                                |
| GJ 2008        | 3,784 |                                                  | 4,9%                                                |

<sup>1</sup> Die FuE-Intensität ist definiert als Verhältnis von FuE-Aufwendungen zum Umsatz.

Der Sektor Industry investierte 1,7 Mrd. EUR mit einer FuE-Intensität von 4,9%, der Sektor Energy 0,8 Mrd. EUR mit einer FuE-Intensität von 3,1% und der Sektor Healthcare 1,1 Mrd. EUR mit einer FuE-Intensität von 9,0%. Weitere FuE-Aufwendungen entfielen auf unsere zentrale Forschungsabteilung (*Corporate Technology, CT*) und auf Siemens IT Solutions and Services.

Wir beschäftigen in Deutschland 12.800 FuE-Mitarbeiter und weitere 17.300 FuE-Mitarbeiter in rund 30 Ländern außerhalb Deutschlands, darunter die USA, China, Österreich und Indien, die Slowakei sowie die Schweiz, Großbritannien, Kroatien, Schweden, Dänemark, die Tschechische Republik und Frankreich.

Weltweit besitzt Siemens rund 58.000 Patente – im Vorjahr waren es noch 56.000 Patente. Mit der Anzahl veröffentlichter Patentanmeldungen lag Siemens für das Kalenderjahr 2009 in der Statistik auf Platz 3 in Deutschland und auf Platz 2 in Europa. Hinsichtlich der Statistik für die Anzahl erteilter Patente lag Siemens im Kalenderjahr 2009 auf Platz 13 in den USA. Im Vergleich war Siemens im Kalenderjahr 2008 auf Platz 2 in Deutschland und in Europa und auf Platz 12 in den USA.

| FuE-Kennzahlen                   |         |         |         |
|----------------------------------|---------|---------|---------|
|                                  | GJ 2010 | GJ 2009 | GJ 2008 |
| Mitarbeiter <sup>1</sup>         | 30.100  | 31.800  | 32.200  |
| Erfindungen <sup>2,3</sup>       | 8.800   | 7.700   | 8.200   |
| Patentanmeldungen <sup>2,4</sup> | 4.300   | 4.200   | 5.000   |

- <sup>1</sup> Durchschnittlich im Geschäftsjahr eingesetzte Mitarbeiter.
- <sup>2</sup> Vorjahresdaten wurden nicht um veräußerte Geschäftsaktivitäten angepasst.
- <sup>3</sup> Anzahl der von den Geschäftseinheiten im Rahmen einer internen Berichterstattung gemeldeten Erfindungen.
- <sup>4</sup> Der Teil der Erfindungen, der als Patentanmeldung bei den Patentämtern eingereicht wurde.

Der Fokus von Forschung und Entwicklung für das Umweltportfolio liegt auf der Effizienzsteigerung der regenerativen und der konventionellen Stromerzeugung, auf der Verbesserung des verlustarmen Stromtransports sowie auf neuen Lösungen für intelligente Stromnetze (*Smart Grids*), der Solarenergie, der Kohlendioxid-Abtrennung in Kraftwerken sowie den Systemen zur Energiespeicherung von fluktuierenden erneuerbaren Energien. Weitere Schwerpunkte sind die Förderung effizienter Energienutzung: bei der Gebäudetechnik ebenso wie bei Industrieanlagen, der Beleuchtung (beispielsweise mit Leuchtdioden) oder dem Verkehr, etwa bei Elektroautos – vom Antrieb bis zu schnelleren Ladestationen. Dazu kommt noch die Weiterentwicklung von Systemen der Wasser- und Luftreinhaltung und der Trinkwasseraufbereitung mit neuen Membrantechnologien.

Die Zusammenarbeit mit Universitäten und nicht universitären Forschungseinrichtungen liefert einen wichtigen Beitrag für die Innovationsfähigkeit von Siemens. Die wesentlichen Ziele dieser Partnerschaften sind die Ausschöpfung des Potenzials für gemeinschaftliche Forschungs- und Entwicklungsprojekte, die Weiterentwicklung und Ausweitung des Netzwerks mit Universitäten oder Forschungseinrichtungen ebenso wie die Stärkung der Attraktivität von Siemens als potenziellem Arbeitgeber für junge hoch qualifizierte Menschen. Mit dem strategischen Kooperationsprogramm »Siemens Center of Knowledge Interchange« betreibt Siemens zudem ein langfristig orientiertes, weltweites Netzwerk mit ausgewählten internationalen Partneruniversitäten zur Förderung von Forschung, Innovation und Wissenstransfer zwischen Industrie und Wissenschaft. Dieses Universitätsprogramm trägt zum Erfolg des »Open Innovation«-Ansatzes von Siemens bei, indem es den Aufbau einer stabilen, langfristigen Partnerschaft mit den führenden Universitäten auf der ganzen Welt unterstützt. Das Ziel des »Open Innovation«-Ansatzes, der bei Siemens im Geschäftsjahr 2009 eingeführt wurde, ist es, neue Innovationsmöglichkeiten zu identifizieren und diese in einem Netzwerk aus Forschern und Entwicklern zu fördern. Diese Vorgehensweise als Bestandteil des Innovationsprozesses bei Siemens stellt sicher, dass das Unternehmen auf Informationen aus Wissenschaft und Technik zurückgreifen kann – so profitieren wir vom externen Wissen und öffnen uns zugleich gegenüber anderen Partnern.

Zudem nimmt Siemens an öffentlich geförderten Programmen teil, die von Organisationen wie der Europäischen Union, dem Bundesforschungsministerium, dem Bundesministerium für Wirtschaft und Technologie und dem Bundesministerium

für Umwelt, Naturschutz und Reaktorsicherheit unterstützt werden. Siemens glaubt, dass diese Aktivitäten nicht nur den Austausch mit externen Partnern im Bereich der Innovation, sondern auch den Zugang zu komplementären technologischen Kompetenzen fördern, die die Innovationskraft des gesamten Unternehmens stärken.

CT arbeitet Hand in Hand mit den FuE-Teams der Sektoren und Divisionen. Dafür ist CT mit über 5.000 Mitarbeitern und ihren Hauptstandorten in Deutschland, den USA, Österreich, der Slowakei, Russland, Indien, China, Japan und Singapur weltweit vernetzt aufgestellt.

Die Sektoren konzentrieren sich mit ihren FuE-Anstrengungen auf die nächste Generation ihrer Produkte und Lösungen und bereiten deren erfolgreiche Markteinführung vor. Im Vergleich dazu richten die Forschungs- und Entwicklungsspezialisten von CT das Augenmerk auf die übernächste Generation und bereiten deren technologische Basis vor. Durch die enge Zusammenarbeit mit den produkt- und kundennahen Unternehmensteilen und durch den intensiven Austausch mit globalen Forschungseinrichtungen gelingt es ihnen, technische und gesellschaftliche Trends frühzeitig zu erkennen, zu analysieren und selbst zu gestalten. CT ist den Grundsätzen von »Open Innovation« verpflichtet und sorgt so kontinuierlich dafür, dass Informationen aus Wissenschaft und Technik in das Unternehmen eingebracht werden.

Zu den rund 50 globalen Technologiefeldern, die von CT abgedeckt werden, gehören die Themengebiete Materialien und Mikrosysteme, Produktionsverfahren, Sicherheit, Software und Engineering, Energietechnik, Sensorik, Automatisierung, medizinische Informationssysteme und bildgebende Verfahren, Informations- und Kommunikationstechnologien, das Gewinnen und Verarbeiten von Rohstoffen sowie nicht netzgekoppelte Energieerzeugung. Zudem enthält das Technologieportfolio mehrere Leuchtturm-Projekte, die darauf abzielen, neue Geschäftschancen für Siemens zu erschließen. Diese decken Bereiche wie Elektromobilität oder Smart Grid ab – also Themen mit großen strategischen Herausforderungen. Die Kombination neuer Technologien und die intensive Kooperation mit den Sektoren können hier völlig neue Lösungen aufzeigen. Unsere SMART-Lösungen (Simplicity, Maintenance friendly, Affordable, Reliable und Timely to market) setzen neue Technologien so um, dass sie auch in niedrigpreisigen Märkten wettbewerbsfähig werden. Diese kostengünstigen Lösungen orientieren sich an den jeweiligen Marktbedürfnissen und zeichnen sich durch einfache Handhabung, War-

tungsfreundlichkeit und Zuverlässigkeit aus. SMART-Lösungen – etwa im Bereich des Gesundheitswesens oder der dezentralen Energieerzeugung – werden zusammen von CT und den Sektoren entwickelt und sind zum Teil schon erfolgreich im Einsatz.

Zu den FuE-Prioritäten im Sektor **Industry** gehört die informationstechnische Integration der Produktplanung und der Fertigungsprozesse im Rahmen des Managements des Produktlebenszyklus. Ziel ist es, die Prozesse an sämtlichen Stellen der Wertschöpfungskette so zu beschleunigen, dass sich die Zeitspanne bis zur Markteinführung um bis zu 50 Prozent verkürzen lässt. Hier kommt der Weiterentwicklung der Automatisierungstechnik und insbesondere der Software eine entscheidende Rolle zu. Darüber hinaus geht es im Sektor Industry vor allem um eine höhere Energieeffizienz, einen geringeren Rohstoffverbrauch und weniger Emissionen. Dies gilt für die Entwicklung leistungsfähiger Beleuchtungslösungen – etwa mit Leuchtdioden – ebenso wie für die Gebäudetechnik oder die Verkehrssysteme mit energiesparenden Antrieben und für unseren »Complete-mobility«-Ansatz. Dessen Zielsetzung ist es, die verschiedenen Verkehrssysteme miteinander zu vernetzen, um so Menschen und Güter noch effizienter, schneller und komfortabler zu ihrem Bestimmungsort zu bringen.

Der Schwerpunkt unserer FuE-Aktivitäten im Sektor **Energy** liegt auf der Entwicklung von Verfahren zur effizienten Stromerzeugung, -übertragung und -verteilung. Dabei wird insbesondere der Umbau bestehender Stromnetze zu Smart Grids eine wesentliche Rolle spielen. Diese intelligenten Netze sind die Voraussetzung für nachhaltige Energiesysteme und die optimale Einbindung immer größerer Mengen erneuerbarer Energien sowie zukünftiger Elektrofahrzeuge. Optimierte Lösungen für solarthermische Kraftwerke gehören ebenso zu den FuE-Themen des Sektors Energy wie schwimmende Windkraftanlagen auf hoher See, innovative Techniken zur verlustarmen Stromübertragung, Wirkungsgradsteigerungen von Kraftwerken durch neue Materialien für Turbinenschaukeln oder Technologien zur Abscheidung des Treibhausgases Kohlendioxid aus dem Rauchgas von fossil befeuerten Kraftwerken.

Die Veränderung der Alterspyramide und wachsende Bevölkerungszahlen lassen den Bedarf nach einer effizienteren Gesundheitsversorgung steigen, die den Menschen bestmögliche Versorgung zu einem bezahlbaren Preis anbieten kann. Die FuE-Aktivitäten des Sektors **Healthcare** konzentrieren

sich daher besonders auf Innovationen, die den Kunden helfen, diesen Herausforderungen bestmöglich zu begegnen. Vor allem geht es um die Verbindung der verschiedenen bildgebenden Verfahren – die immer detailliertere, schnellere und patientenschonendere dreidimensionale Einblicke in den Körper ermöglichen – mit modernen therapeutischen Maßnahmen sowie der Labordiagnostik und der Informationstechnologie, um deutlich verbesserte, aufeinander abgestimmte Arbeitsabläufe zu schaffen. Der Sektor Healthcare will den Marktanforderungen bestmöglich gerecht werden. Zu diesem Zweck setzt er gleichermaßen Schwerpunkte auf Produktinnovationen zur Automatisierung der klinischen Arbeitsabläufe und Optimierung der labordiagnostischen Methoden. Dank der Informationen aus den unterschiedlichen Diagnoseverfahren können Mediziner Krankheiten noch besser und früher erkennen und Therapien individueller auf die Patienten ausrichten, indem sie die Wirkung von Medikamenten präziser überwachen und die Auswert- und Analysefähigkeiten moderner Computertechnik nutzen. Gleichzeitig werden im Sektor zielgerichtet Produkte entwickelt, die den spezifischen Anforderungen der Gesundheitssysteme der Schwellenländer entsprechen. Dadurch leisten wir einen Beitrag zum Aufbau einer medizinischen Grundversorgung in diesen Ländern.

### Supply Chain Management (Steuerung der Versorgungskette)

Im Geschäftsjahr 2009 hatten wir eine Supply-Chain-Management-Initiative mit dem Ziel gestartet, gemeinsam mit unseren Lieferanten ein führendes globales Beschaffungsnetzwerk aufzubauen, technologische Entwicklungen voranzutreiben und Innovationszyklen zu verkürzen. Nachdem diese Initiative bereits wesentliche und nachhaltige Einsparungen für Siemens erzielt hatte, wurde sie im Geschäftsjahr 2010 in eine neue und dauerhafte Supply-Chain-Management-Organisation innerhalb des Unternehmens verlagert. Das Supply Chain Management bei Siemens ist darauf ausgerichtet, die Verfügbarkeit und Qualität der Materialien zu gewährleisten, die wir zur Bedienung unserer Kunden benötigen. Dies kann nur mithilfe eines global ausgewogenen, lokal verankerten sowie engmaschig verknüpften Netzwerks mit unserer Lieferantenbasis erreicht werden. Zudem ist es erforderlich, das Supply Chain Management eng mit den Siemens-Geschäften zu verzahnen und strategisch auf diese auszurichten.

Ein Eckpfeiler unserer neuen Organisationsprinzipien für das Supply Chain Management ist die globale und zentralisierte Verantwortung für alle indirekten Materialien sowie für alle unternehmensweit gesteuerten direkten Materialien. Dies ist

ein wichtiger Schritt in Richtung eines der zentralen Ziele der früheren Initiative: den Anteil der unternehmensweit gesteuerten Materialien signifikant zu erhöhen, um Bündelungseffekte unternehmensweit noch effektiver nutzen zu können.

Der zweite wesentliche Bestandteil unserer Supply-Chain-Management-Initiative war das Global Value Sourcing, die globale Wertschöpfung im Einkauf. Hierbei geht es um die Entwicklung eines wettbewerbsfähigen, weltweiten Lieferantennetzwerks sowie um gemeinsame Produktentwicklungen und Innovationen mit unseren Schlüssellieferanten. Zudem wollen wir unseren Einkaufsanteil aus Entwicklungsländern (*Global-Value-Sourcing-Länder*) erhöhen, um eine bessere Ausgewogenheit unserer regionalen Umsatz- und Einkaufsvolumina zu erreichen. Und schließlich sah unsere Initiative als weitere Maßnahme die Optimierung unserer Lieferantenbasis vor. Dazu sollen die Zahl der Lieferanten reduziert und die Zusammenarbeit mit denjenigen Lieferanten intensiviert werden, die den höchsten Beitrag zu unserer Wertschöpfung leisten.

Im Geschäftsjahr 2009 hatten wir uns im Rahmen der Supply-Chain-Management-Initiative klare und ehrgeizige Ziele gesetzt. Unser erstes Ziel – den Anteil des unternehmensweit gesteuerten Einkaufsvolumens gegenüber dem Geschäftsjahr 2008 um 60 Prozent zu erhöhen – haben wir zum Ende des Geschäftsjahrs 2010 erreicht. Unser zweites Ziel war es, die Zahl unserer Lieferanten mittelfristig um 20 Prozent zu reduzieren. Dieses Ziel haben wir zum Ende des Geschäftsjahrs 2010 ebenfalls erreicht. Und schließlich hatten wir uns noch das Ziel gesetzt, mittelfristig unseren Einkaufsanteil aus *Global-Value-Sourcing-Ländern* auf 25 % des gesamten Einkaufsvolumens von Siemens zu erhöhen. Im Geschäftsjahr 2010 konnten wir unsere internen Ziele in Bezug auf das *Global Value Sourcing* übertreffen und sind auf dem Weg, unser entsprechendes mittelfristiges Ziel zu erreichen.

Ein weiterer wichtiger Aspekt des Supply Chain Management bei Siemens ist die Nachhaltigkeit in unserer Lieferkette. Hier erzielten wir im aktuellen Geschäftsjahr weitere Fortschritte und werden unsere diesbezüglichen Aktivitäten auch im Geschäftsjahr 2011 vorantreiben. Siemens fordert von allen Lieferanten, die Grundsätze des Code of Conduct für Siemens-Lieferanten einzuhalten und deren Umsetzung auch in der eigenen Lieferkette zu unterstützen. Wir lassen dazu auch weltweit von externen Experten vor Ort Nachhaltigkeitsprüfungen (*Audits*) durchführen, um die Einhaltung unserer Standards sicherzustellen und ein auf Nachhaltigkeit aufbauendes Wirtschaften entlang unserer gesamten globalen Lieferkette zu

fördern. Darüber hinaus streben wir an, durch einen neuen Ansatz den kontinuierlichen Feedback-Prozess von unseren Lieferanten weiter zu optimieren. Insbesondere wollen wir von ihnen in Erfahrung bringen, wie Siemens sie bei der Umsetzung nachhaltigen Wirtschaftens besser unterstützen und integrieren kann.

Ferner haben wir für unsere Lieferanten ein Energieeffizienz-Programm entwickelt. Gemeinsam mit ihnen arbeiten wir auf der Basis von Umwelt- und Energieeffizienzchecks daran, jede Möglichkeit zur Reduzierung des Energie- und Ressourcenverbrauchs zu identifizieren. Dabei greifen wir auf das Know-how und die Expertise zurück, die wir aus unserem eigenen Umweltprogramm und unserem Umweltportfolio gewonnen haben. Für weiterführende Informationen siehe »– Nachhaltigkeit – Umweltschutz«. Dieses Programm soll über die kommenden beiden Geschäftsjahre für die ersten 1.000 Lieferanten umgesetzt werden.

### Produktion und Qualitätsmanagement

Siemens hat weltweit über 300 Produktions- und Fertigungsstätten (Werke) in mehr als 40 Ländern. Als eine Produktions- und Fertigungsstätte definiert Siemens eine Einheit auf Geschäftsebene, in der in großem Umfang unter Einsatz von Anlagen und Produktionsmitteln, wie Maschinen, Werkzeugen, Energie und Arbeitskraft, aus Rohstoffen und Ausgangsmaterialien fertige Güter hergestellt werden. In der Region Europa, GUS, Afrika, Naher und Mittlerer Osten ist Siemens mit über 160 Produktions- und Fertigungsstätten vertreten, gefolgt von der Region Amerika mit über 80 Werken und der Region Asien, Australien mit über 80 Werken. Der Sektor Industry hat mit über 190 Werken den größten Anteil an unseren Produktions- und Fertigungsstätten, gefolgt vom Sektor Energy mit mehr als 100 Werken und dem Sektor Healthcare mit mehr als 30 Werken.

Im Mittelpunkt der Fertigungsstandort-Strategie von Siemens stehen die nachhaltige Verbesserung der Kostenposition für unsere Produkte und Lösungen sowie die Erschließung neuer Märkte. So ist Siemens in China, einem der größten Wachstumsmärkte für das Unternehmen, mit mehr als 50 Produktions- und Fertigungsstätten vertreten. Die eigene Produktion ist damit eine der wichtigsten Säulen in der Geschäftstätigkeit von Siemens. Eines der wesentlichen Merkmale der Produktionstätigkeit bei Siemens ist die Heterogenität bei Produkten, Volumina und Prozessen. So reichen die Produktpalette vom optischen Halbleiter bis zur 600-Tonnen-Dampfturbine, das Produktionsvolumen vom kundenspezifischen Einzelauftrag

bis zur Hightech-Serienproduktion und die Fertigungsprozesse von der automatisierten Produktion in Reinräumen bis zur manuellen Endmontage von Großanlagen auf Baustellen.

Es ist unser Anspruch, unsere Fertigungsprozesse auf Grundlage der »Lean-Prinzipien« kontinuierlich zu verbessern und schlanker zu gestalten, um sowohl die wachsenden Anforderungen unserer Kunden erfüllen zu können als auch unsere Kostenposition und die unserer Kunden gegenüber Wettbewerbern zu festigen. Mit der Implementierung von Lean-Prinzipien im Rahmen des Siemens Production System (SPS) erreichen wir kürzere Durchlaufzeiten und dadurch eine höhere Qualität unserer Prozesse, Produkte und Lösungen. Dies ermöglicht uns eine Verbesserung der Flexibilität und Liefertreue gegenüber unseren Kunden. Die Mitarbeiter sind dabei aktiv in die Gestaltung der Prozesse eingebunden und stehen damit im Mittelpunkt eines nachhaltigen Veränderungsmanagements.

Mittlerweile ist das SPS weltweit bereits in mehr als 120 Produktions- und Fertigungsstätten eingeführt worden. Langfristiges Ziel ist es, dass alle unsere Produktions- und Fertigungsstätten von der Lean-Production-Philosophie profitieren. Zu diesem Zweck führt Siemens insbesondere in China und in den USA gezielte Aktivitäten durch. Im Geschäftsjahr 2009 hat Siemens zum systematischen Kompetenzaufbau und zur Ausbildung zertifizierter Experten ein »SPS-Expert«-Programm aufgesetzt. Fast 200 Mitarbeiter sind seitdem diesem Ausbildungsprogramm beigetreten.

Zusätzlich optimiert Siemens derzeit seine weltweit wichtigsten Standorte in puncto Umweltschutz und Energieverbrauch und beabsichtigt, Investitionen in die weitere Optimierung auch in künftigen Perioden fortzuführen. Ziel dabei ist eine Reduzierung des Energieverbrauchs und des Kohlendioxid-Ausstoßes. Siemens bietet diesen Umwelt- und Energiecheck auch seinen Lieferanten an. Für weitere Informationen hierzu verweisen wir auf »– Supply Chain Management (Steuerung der Versorgungskette)«.

Wir glauben, dass Siemens für eine Qualitätskultur steht, die den Kunden und seine Anforderungen in den Mittelpunkt stellt. Herausragende Qualität unserer Produkte und Lösungen ist ein entscheidender Erfolgsfaktor für unser Unternehmen. Unser Ziel ist es, eine Kultur fortwährender Verbesserung und Transparenz auf höchstem Niveau zu leben. Siemens hat hierfür unternehmensweit einen umfassenden Qualitätsansatz entwickelt, um die Qualität seiner Produkte

und Prozesse zu steigern. Darin definiert Siemens verbindliche Elemente und erklärt diese zum unternehmensweiten Standard für alle Siemens-Einheiten weltweit. Sie enthalten verpflichtende Vorgaben in den Bereichen Qualitätsverantwortung, Qualitätscontrolling, Prozessqualität und Qualitätsbewusstsein.

Unsere Qualitätsmanagementorganisation ist auf allen Ebenen unseres Geschäfts etabliert. Rund 9.000 Mitarbeiter arbeiten aktiv im Qualitätsmanagement und in der Qualitätssicherung in unseren Sektoren, Divisionen, Geschäftseinheiten sowie unseren regionalen Clustern. Besonderen Wert legen wir dabei auf Messbarkeit und Transparenz von Qualität. Kundenzufriedenheit als vorrangiges Qualitätsziel messen wir dabei mit dem Net Promoter Score (NPS). Für weitere Informationen zum Net Promoter Score siehe »- Vertrieb und Kundenbeziehungen«. Interne Überprüfungen (*Audits*) und Bewertungen sowie regelmäßige Vergleiche mit Wettbewerbern helfen uns, die Wirksamkeit und Weiterentwicklung unseres Qualitätsmanagements sicherzustellen. Das Siemens-Qualitätsmanagement erfüllt – und übertrifft in vielerlei Hinsicht – die Anforderungen anerkannter und relevanter internationaler Standards.

Die Qualität unserer Produkte und Prozesse hängt maßgeblich von den Fähigkeiten unserer Mitarbeiter ab. Eine breite Qualifizierung in Qualitätsthemen ist daher fester Bestandteil unserer Unternehmenskultur. Siemens stellt hierfür umfangreiche Trainingsmaßnahmen für Qualitätsmanager, Führungskräfte und Mitarbeiter zur Verfügung. Diese reichen von webbasierten Lösungen über zielgruppenspezifische Ausbildungskonzepte bis hin zu On-the-job-Trainings. Zusätzlich zu den klassischen Feldern »integrierte Managementsysteme«, »Audit« und »Qualitätswerkzeuge« wird das maßgeschneiderte Trainingsportfolio regelmäßig erweitert. Die Trainings werden in Zusammenarbeit mit internen Erfahrungsträgern und Experten von Universitäten und Partnerinstitutionen entwickelt. So stellen wir die Weitergabe von Know-how auf hohem Niveau sicher.

Ein essenzielles Qualitätsmerkmal und damit übergeordnetes Ziel des gesamten Wertschöpfungsprozesses ist dabei auch die Produktsicherheit. Die sichere Ausgestaltung aller von uns entwickelten, hergestellten und/oder vertriebenen Produkte und Dienstleistungen stellt Anforderungen an nahezu alle Funktionsbereiche unseres Unternehmens und berücksichtigt den gesamten Lebenszyklus unserer Produkte (Entwicklung, Fertigung, Wartung/Instandhaltung, Aufrüstung/Um-

bau bis zur Entsorgung). Berücksichtigt werden nicht nur rechtliche Anforderungen und relevante Normen, auch der aktuelle Stand von Wissenschaft und Technik wird beachtet.

### Vertrieb und Kundenbeziehungen

Unsere Sektoren, Divisionen, Geschäftseinheiten und Sektorübergreifenden Geschäfte tragen die globale Verantwortung für ihr Geschäft, ihren Umsatz und ihr Ergebnis. Sie können ihre Kunden von ihrem jeweiligen Stammsitz aus weltweit direkt unterstützen, insbesondere bei großen Aufträgen und Projekten. Bei den meisten Siemens-Kunden handelt es sich jedoch um kleine und mittlere Unternehmen und Organisationen, die Unterstützung vor Ort benötigen. Für dieses lokale Geschäft kann Siemens auf eine starke, globale Vertriebsorganisation zurückgreifen, die von unseren regionalen Clustern und Regionalgesellschaften gesteuert wird. Die Regionalgesellschaften sind für den sektor- und divisionsübergreifenden Vertrieb des Siemens-Portfolios in den unterschiedlichen Ländern verantwortlich. Siemens strebt an, weltweit nahe bei seinen Kunden zu sein und ihnen in lokalen Partnerschaften schnelle und maßgeschneiderte Lösungen für ihre geschäftlichen Anforderungen anbieten zu können. Wir sind überzeugt, dass uns unsere Präsenz in rund 190 Ländern einen bedeutenden Wettbewerbsvorteil an unseren Märkten verschafft. In vielen dieser Länder blicken wir auf eine lange Geschichte zurück, sodass wir häufig bereits als einheimisches Unternehmen betrachtet werden, beispielsweise in den rasant wachsenden Märkten der BRIC-Länder: Im Jahr 1855 gründeten wir unsere erste Tochtergesellschaft in Russland; im Jahr 1904 eröffneten wir unsere erste dauerhafte Präsenz in China; im Jahr 1905 gründeten wir in Brasilien unsere Tochtergesellschaft Siemens do Brasil; und unsere erste Tochtergesellschaft in Indien wurde im Jahr 1924 gegründet. Ein grundlegender Bestandteil aller unserer globalen Marketing- und Vertriebsaktivitäten ist die Einhaltung geltender Gesetze sowie unternehmensinterner Regelungen und Richtlinien. Für weitere Informationen zu unserem Compliance-Programm siehe »- Nachhaltigkeit – Compliance«.

Ein wichtiger Treiber für die Kundenorientierung bei Siemens ist unser **Executive Relations Program**, das auf unsere großen Kunden ausgerichtet ist. Es dient dem Aufbau und der Pflege langfristiger Beziehungen mit den oberen Führungskräften unserer Kunden. Wir haben dieses Programm bereits auf Vorstandsebene eingerichtet: Alle Vorstandsmitglieder stehen in direktem Kontakt mit wichtigen Schlüsselkunden, pflegen dabei einen kontinuierlichen Dialog und nehmen sich persönlich der Geschäftsbedürfnisse unserer Kunden an. Dar-



über hinaus wurde dieses Programm unter Einbindung der oberen Führungsebene unserer Regionalgesellschaften auch auf Länderebene eingeführt.

Der Aufbau langfristiger und kundenorientierter strategischer Partnerschaften ist für Siemens äußerst wichtig, da sich unser Portfolio in erster Linie auf Investitionsgüter und damit verbundene Dienstleistungen, häufig mit langen Lebenszyklen, konzentriert. Wir verfolgen daher einen strukturierten **Key-Account-Management-Ansatz**, der sich an die individuelle Größe und regionale Struktur unserer Kunden anpasst. Unsere Regional Account Manager sind über unsere Geschäfte hinweg für unsere Kunden in bestimmten Ländern oder Regionen verantwortlich. Unsere Global Account Manager sind für unsere globalen geschäftlichen Aktivitäten mit den Kunden spezifischer Divisionen verantwortlich. Und schließlich sind unsere Corporate Account Manager für die Großkunden verantwortlich, deren Geschäftsaktivitäten verschiedene geografische Regionen und mehrere Siemens-Divisionen abdecken.

Zur Steuerung der Key-Account-Management-Aktivitäten für Großkunden und zur Erschließung von Marktchancen für Siemens haben wir für spezifische Märkte, die für mehrere unserer Divisionen von strategischer Relevanz sind, **Market Development Boards** eingerichtet. Ziel der Market Development Boards ist es, Synergieeffekte zu schaffen, indem sie die Interessen und Ressourcen dieser Divisionen vereinen und einen koordinierten Marktauftritt entwickeln und umsetzen. Mit diesem Ansatz können wir unseren Kunden ein umfassendes, unternehmensweites Spektrum an Produkten, Lösungen und Dienstleistungen aus einer Hand anbieten, das ihnen dabei helfen kann, ihre wichtigsten Herausforderungen anzugehen. Daher glauben wir, mit diesem Ansatz unsere Wettbewerbsposition erheblich verbessern zu können, da wir damit die Bedürfnisse dieser Märkte besser einschätzen können und auf der Basis unserer globalen Kompetenzen und Ressourcen in der Lage sind, spezifische Lösungen aus dem gesamten Siemens-Portfolio anzubieten. Wir überprüfen regelmäßig die strategische Bedeutung der verschiedenen Marktchancen für unser Unternehmen. Dies hat kürzlich zur Einrichtung neuer Market Development Boards für Städte, Energieversorgungsunternehmen und Rechenzentren geführt.

Um die hohe Qualität und die kontinuierliche Verbesserung unserer Kundenbetreuung zu gewährleisten, haben wir das **Account Management Excellence Program** und das **Sales Management Excellence Program** aufgelegt. Im Rahmen dieser Programme werden Stärken-Schwächen-Analysen sowie

Trainings- und Qualifizierungsmaßnahmen durchgeführt – eine wichtige Voraussetzung dafür, weltweit einen gleichbleibend hohen Standard in der Kundenbetreuung zu garantieren.

Der Erfolg unseres Unternehmens hängt letztendlich von der Zufriedenheit unserer Kunden ab. Um diese zu messen, unseren Kundenfokus weiter zu stärken und die Entwicklung unserer Kundenbeziehungen zu verfolgen, haben wir den **Net Promoter Score** als einheitlichen, unternehmensweiten Standard eingeführt. Diese international anerkannte und verbreitete Steuerungsgröße misst auf der Basis von einmal jährlich weltweit durchgeführten Erhebungen die Wahrscheinlichkeit, mit der unsere Kunden uns weiterempfehlen. Im Geschäftsjahr 2010 wurden dafür mehr als 18.500 Interviews geführt. Die Ergebnisse der Erhebung helfen Siemens, sich sowohl intern – auf Ebene der Divisionen und Regionen – als auch extern vergleichen zu können sowie Verbesserungspotenziale zu identifizieren. Direkt nach Abschluss der Erhebung für das Jahr 2010 haben wir auf Unternehmens- und Sektorebene Folgeaktivitäten eingeleitet. Wir werden den Fortschritt spezifischer Maßnahmen genau verfolgen.

## NACHHALTIGKEIT

### Nachhaltigkeit bei Siemens

Nachhaltigkeit bedeutet für Siemens, im Sinne künftiger Generationen verantwortungsvoll zu handeln, um wirtschaftlichen, ökologischen und sozialen Fortschritt zu erreichen. Die drei Dimensionen nachhaltiger Entwicklung – die ökologische, die wirtschaftliche sowie die soziale Dimension – bilden dabei die Grundlage unseres Handelns. Im Hinblick auf die ökologische Dimension bieten wir innovative Produkte und Lösungen an, die sowohl unsere eigene als auch die Ökobilanz unserer Kunden und Lieferanten verbessern. In wirtschaftlicher Hinsicht konzentrieren wir uns auf eine langfristige Wertschaffung, wie wir es in anderen Abschnitten dieses Zusammengefassten Lageberichts dargestellt haben. Dies schließt den Abschnitt »– Wertschöpfungskette – Forschung und Entwicklung« mit ein. Auf sozialer Ebene fördern wir die Entwicklung unserer Mitarbeiter und streben danach, in allen Gesellschaften, in denen wir tätig sind, als gesellschaftlich engagiertes Unternehmen (*Corporate Citizen*) wahrgenommen zu werden.

## Organisation

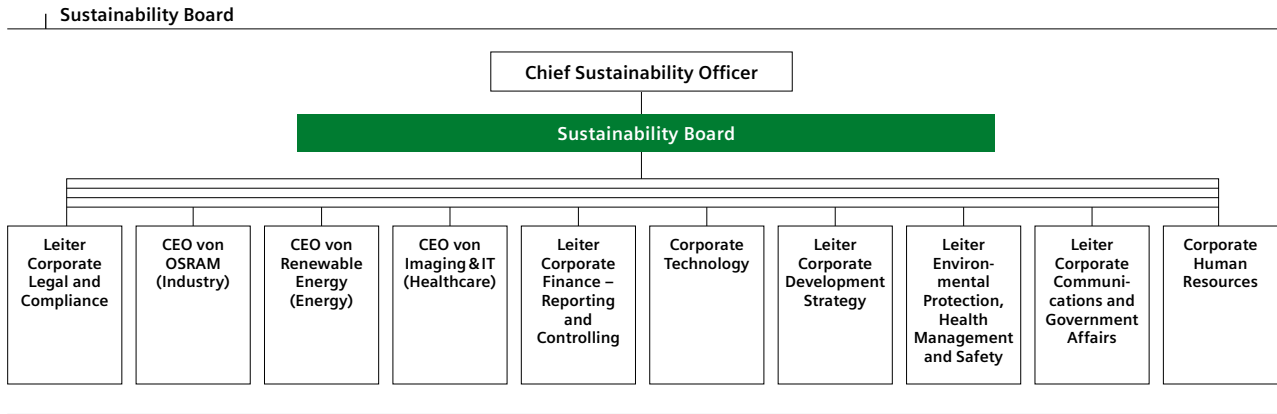

Das **Siemens Sustainability Board**, dem ein Mitglied unseres Vorstands als **Chief Sustainability Officer** vorsteht, ist das zentrale Steuerungsgremium für Nachhaltigkeit bei Siemens. In regelmäßigen Sitzungen legt es unsere Nachhaltigkeitsstrategie fest und verabschiedet entsprechende Maßnahmen und Initiativen. Unser Chief Sustainability Officer leitet zudem das **Sustainability Office**, das für die Umsetzung der Nachhaltigkeitsstrategie sowie für die Koordinierung unternehmensweiter Programme und Maßnahmen verantwortlich ist.

Damit wir einen objektiven Blick auf unsere Herausforderungen und unsere Leistungen in Nachhaltigkeitsfragen bewahren, haben wir das **Siemens Sustainability Advisory Board** ins Leben gerufen. Dieses Gremium setzt sich aus neun bedeutenden Persönlichkeiten aus Wissenschaft und Wirtschaft zusammen, aus unterschiedlichen Themenfeldern und von verschiedenen Kontinenten. Keines seiner Mitglieder ist Arbeitnehmer von Siemens. Das Board trifft sich mindestens zweimal im Jahr und soll durch fachlichen Dialog wie auch durch konkrete Initiativen zur Weiterentwicklung unseres Nachhaltigkeitsprogramms beitragen.

### Prinzipien, Richtlinien und Leistungen

Unsere Nachhaltigkeitsbestrebungen basieren grundsätzlich auf unseren Business Conduct Guidelines, die den ethischen Rahmen für unsere Geschäftsaktivitäten abstecken. Sie enthalten die grundlegenden Prinzipien und Regeln für unser Verhalten innerhalb unseres Unternehmens sowie in Beziehung zu unseren externen Partnern und der Öffent-

lichkeit. Bestimmte Themenfelder, zum Beispiel Umweltfragen, werden in detaillierteren Bestimmungen und Richtlinien behandelt. Dieses umfassende Regelwerk ist grundsätzlich für alle Unternehmen bindend, auf die Siemens einen beherrschenden Einfluss ausüben kann.

Zusätzlich zu unseren eigenen Vorgaben arbeitet Siemens aktiv mit weltweit führenden Nachhaltigkeitsorganisationen wie dem World Business Council for Sustainable Development (WBCSD) zusammen und hat sich internationalen Nachhaltigkeitsstandards und -richtlinien verpflichtet. Unter anderem sind wir im Jahr 2003 dem Global Compact der Vereinten Nationen beigetreten und haben im Jahr 2008 das CEO Water Mandate des Global Compact unterzeichnet. Wir berichten regelmäßig über unsere Nachhaltigkeitsleistungen in Einklang mit den aktuellen Richtlinien der Global Reporting Initiative (GRI), die für mehr Transparenz und Vergleichbarkeit in der Nachhaltigkeitsberichterstattung eintritt.

Siemens ist seit elf Jahren ununterbrochen im renommierten SAM Dow Jones Sustainability Index vertreten und belegte 2010 den ersten Platz in der Branche »Diversified Industrials«. Auch in einer Reihe weiterer Indizes und Rankings erzielten wir höchste Platzierungen, unter anderem in denen des angesehenen Carbon Disclosure Project (CDP). In seinem Carbon Disclosure Leadership Index (CDLI) 2010 hat das CDP Siemens als bestes Unternehmen weltweit ausgezeichnet und uns außerdem in seinen Carbon Performance Leadership Index (CPLI) aufgenommen.

## Mitarbeiter

### Wichtige Kennzahlen

|                                                                  | Geschäftsjahresende<br>30. September |       |
|------------------------------------------------------------------|--------------------------------------|-------|
|                                                                  | 2010                                 | 2009  |
| Mitarbeiterfluktuationsrate <sup>1</sup>                         | 12,9%                                | 17,4% |
| Frauenanteil (in Prozent der Mitarbeiter in Führungspositionen)  | 13,7%                                | 13,6% |
| Ausgaben für Weiterbildung (in Mio. EUR) <sup>2</sup>            | 225                                  | 228   |
| Ausgaben für Weiterbildung pro Mitarbeiter (in EUR) <sup>2</sup> | 560                                  | 562   |

- 1 Die Mitarbeiterfluktuationsrate ist definiert als Quotient aus der Zahl der freiwilligen und unfreiwilligen Abgänge von Siemens während des Geschäftsjahrs zur Gesamtzahl der Mitarbeiter.
- 2 Ohne Berücksichtigung von Reisekosten.

Unsere Mitarbeiter leisten einen wichtigen Beitrag für den Erfolg unseres Unternehmens. Deshalb ist es unser Ziel, weltweit die besten und fähigsten Mitarbeiter zu gewinnen, sie zu fördern und sie an unser Unternehmen zu binden. Unsere nachhaltige Personalpolitik setzt dabei Schwerpunkte bei Diversity, also der Vielfalt unserer Mitarbeiter, bei den Themen Lernen und Weiterbildung, bei der Förderung einer Hochleistungskultur sowie bei Arbeitssicherheit und Gesundheitsmanagement. Ein faires Miteinander von Unternehmensleitung, Mitarbeitern und Arbeitnehmervertretungen spielt eine zentrale Rolle bei Siemens.

Die Arbeitsplätze unserer Mitarbeiter zu sichern ist ein wichtiger Bestandteil unserer Personalpolitik. Dabei geht es uns nicht nur darum, ihre fachliche Expertise für Siemens zu erhalten. Als einer der in Deutschland sowie weltweit größten Arbeitgeber stellen wir uns auch unserer sozialen Verantwortung und respektieren und schützen die grundlegenden Rechte unserer Arbeitnehmer. Dies zeigte sich besonders deutlich in dem schwierigen makroökonomischen Umfeld, das in den vergangenen beiden Geschäftsjahren vorherrschte. In enger

Zusammenarbeit mit dem Gesamtbetriebsrat haben wir Richtlinien für im jeweiligen Bedarfsfall angemessene beschäftigungssichernde Personalmaßnahmen festgelegt. Diese schlossen Vereinbarungen für Kurzarbeit an Standorten in Deutschland mit ein. Beschäftigungssichernde Maßnahmen versetzten uns in die Lage, kurzfristige Volumenrückgänge im Geschäftsjahr 2010 gut abzufedern. Wenn allerdings in Zukunft dauerhafte strukturelle Veränderungen stattfinden sollten und unsere kurzfristigen beschäftigungssichernden Maßnahmen nicht ausreichen, müssten weitergehende Anpassungsmaßnahmen geprüft werden.

Im Geschäftsjahr 2010 haben wir zum ersten Mal eine weltweite Mitarbeiterbefragung zu Engagement und Compliance durchgeführt (Siemens Global Engagement and Compliance Survey 2010). Mehr als 275.000 Siemens-Mitarbeiter nahmen an dieser weltweit in mehr als 40 Sprachen durchgeführten Befragung teil. Die Ergebnisse waren sehr ermutigend und belegten das große Engagement unserer Mitarbeiter für Siemens und seine Werte. Sie zeigten allerdings auch, dass es in bestimmten Bereichen noch Raum für Verbesserungen gibt.

### Mitarbeitervielfalt (Diversity)

Als weltweit agierender Technologiekonzern ist Siemens darauf angewiesen, überall auf der Welt talentierte Mitarbeiter zu gewinnen und für sie ein Umfeld zu schaffen, in dem sie ihre Fähigkeiten bestmöglich entwickeln und in das Unternehmen einbringen können. Unsere Diversity-Initiativen werden von unserem Chief Diversity Officer gesteuert und orientieren sich an drei grundsätzlichen Prinzipien:

- > Wir möchten jede Position mit dem am besten geeigneten Mitarbeiter besetzen.
- > Wir möchten Möglichkeiten für vielfältige Erfahrungen und Interaktionen schaffen.
- > Wir möchten die Vielfalt von Denkweisen innerhalb unseres Unternehmens fördern.

### Mitarbeiter nach Segmenten zum 30. Sept. 2010 (in Tausend)

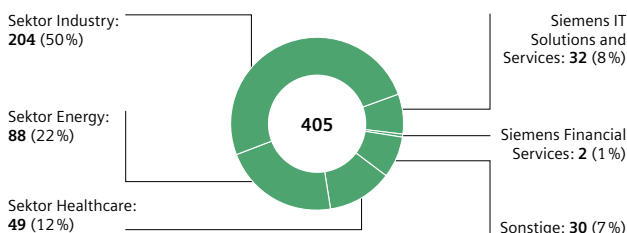

### Mitarbeiter nach Regionen zum 30. Sept. 2010 (in Tausend)

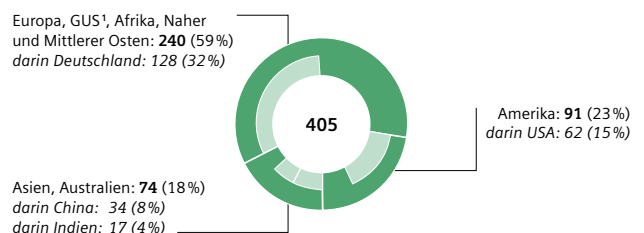

<sup>1</sup> Gemeinschaft Unabhängiger Staaten.

**Diversity Scorecard** – Wir sind dabei, Praktiken zu implementieren, die die Vielfalt im gesamten Unternehmen fördern. Dafür haben wir diesbezüglich relevante Daten gesammelt und analysiert, eine Reihe von Messgrößen sowie eine Scorecard entwickelt, anhand derer wir unsere Fortschritte in fünf strategischen Bereichen messen können: Fachwissen, Mitarbeitervielfalt auf allen Ebenen, Zusammensetzung unseres Nachwuchsführungskräftekreises (Top Talent Pool), Unternehmenskultur und Branding sowie Erfahrungsmix.

**Vielfalt in Führungspositionen** – Der Anteil von Frauen in Führungspositionen hat sich bei Siemens seit dem Geschäftsjahr 2002 um mehr als 50% erhöht, auf 13,7 Prozent im Geschäftsjahr 2010. Im Geschäftsjahr 2009 haben wir den Einstellungsprozess für die Besetzung von wichtigen Führungspositionen bei Siemens systematisiert, um dazu beizutragen, dass bereits die Vorauswahl der Bewerber die Vielfalt unserer Kunden und Mitarbeiter auf allen Ebenen und in allen Regionen widerspiegelt.

**Vereinbarkeit von Beruf und Familie (Work-Life-Balance)** – Immer mehr Mitarbeiter wünschen sich flexible Lösungen, um den Beruf mit ihrem Privatleben und insbesondere ihren Kinderbetreuungspflichten zu vereinbaren. Indem wir ihnen – unter Berücksichtigung der jeweiligen lokalen Rahmenbedingungen – diese Flexibilität bieten, fördern wir die Vielfalt unter unseren Mitarbeitern und verschaffen Siemens einen Vorteil bei der Einstellung und Bindung von Mitarbeitern. An vielen unserer weltweiten Standorte bieten wir heute Möglichkeiten für flexible Arbeitszeiten sowie Teilzeit- und Telearbeit. Parallel dazu treiben wir – wiederum unter Berücksichtigung der lokalen Rahmenbedingungen – den Ausbau von betriebsnaher Kinderbetreuung voran – also von Kinderkrippen, Kindergärten und Horten. Dies betrifft insbesondere Deutschland. Wir werden uns auch weiterhin darum bemühen, innerhalb des gesamten Siemens-Konzerns die Flexibilität unserer Mitarbeiter zu erhöhen und die Vereinbarkeit von Familie und Beruf zu verbessern.

### **Lernen und Weiterbildung**

Wir möchten die Qualifikation und das Fachwissen unserer Mitarbeiter an allen Standorten fördern und erweitern. Im Geschäftsjahr 2010 haben wir für Weiterbildung rund 225 Millionen EUR (ohne Berücksichtigung von Reisekosten) aufgewendet, was einem Aufwand von etwa 560 EUR pro Mitarbeiter entspricht. Diese Aufwendungen beinhalten Kurse und Schulungsprogramme sowohl für einzelne Mitarbeiter als auch für

ganze Unternehmenseinheiten oder Mitarbeiterkategorien. Unsere nächste Generation von Führungskräften bereiten wir beispielsweise über das Siemens-Leadership-Excellence-Programm gezielt auf ihre künftigen Aufgaben vor. Sogenannte *Global Core Learning Programs* vermitteln Kompetenzen und Fähigkeiten, die speziell auf bestimmte Arbeitsplatzkategorien zugeschnitten sind. Funktional ausgerichtete Schulungsmaßnahmen fördern die Entwicklung von Fähigkeiten, die für bestimmte Unternehmensfunktionen notwendig sind. Funktionsübergreifende Schulungen vermitteln Kenntnisse und Fähigkeiten, die für mehrere Arbeitsplatzkategorien und Unternehmensfunktionen relevant sind.

Darüber hinaus ist Siemens in Deutschland weiterhin eines der größten Ausbildungsunternehmen für Realschulabsolventen. Wie in den Jahren zuvor stellen wir außerdem erneut 250 zusätzliche Ausbildungsplätze für benachteiligte Jugendliche zur Verfügung.

### **Förderung einer Hochleistungskultur**

Die variable Vergütungskomponente, die für den Vorstand und das obere Management (*Senior Management*) weltweit verpflichtend ist, setzt sich aus drei Zielkategorien zusammen: erstens der Leistung der organisatorischen Einheit (gemessen an internen Finanzzielen sowie weiteren strategischen Zielen der Einheit, zum Beispiel Leistung gemessen am Wettbewerb und an den Zielen unseres Compliance-Programms), zweitens der persönlichen Leistung sowie drittens der Leistung von Siemens. Somit wollen wir Höchstleistungen auf allen Ebenen sicherstellen. Mit der klaren Absicht, eine Aktienkultur im Unternehmen zu fördern, haben wir zudem verschiedene Aktien-Beteiligungsprogramme für das obere Management und andere Mitarbeiter eingeführt. Wir sind der festen Meinung, dass Mitarbeiter, die zugleich Aktionäre sind, verantwortungsbewusst und unternehmerisch denken und handeln – eine fundamentale Voraussetzung für die nachhaltige Entwicklung unseres Unternehmens. Für weitere Informationen zu diesen Programmen siehe »Anhang zum Konzernabschluss«.

### **Arbeitnehmerrechte und Beziehungen zu den Arbeitnehmervertretungen**

Wir respektieren und beachten die grundlegenden Rechte unserer Arbeitnehmer. Als Zeichen für dieses Engagement ist Siemens im Jahr 2003 dem Global Compact der Vereinten Nationen beigetreten. Wir bekennen uns damit zu zentralen Grundsätzen wie der Allgemeinen Erklärung der Menschen-

rechte der Vereinten Nationen, der Erklärung über die grundlegenden Prinzipien und Rechte bei der Arbeit der Internationalen Arbeitsorganisation (*International Labor Organization, ILO*) sowie den Grundsätzen der Rio-Erklärung der Vereinten Nationen. Diese verschiedenen Grundsätze spiegeln sich auch in unseren Business Conduct Guidelines wider. Darüber hinaus spielt eine von Fairness geprägte Kommunikation und Zusammenarbeit zwischen der Unternehmensleitung, den Mitarbeitern und den Arbeitnehmervertretern unseres Unternehmens eine zentrale Rolle bei Siemens. Diese Zusammenarbeit beinhaltet die zeitgerechte gegenseitige Information sowie einen offenen Dialog zwischen allen Beteiligten.

### Arbeitssicherheit und Gesundheitsmanagement

Das breite Spektrum unserer Geschäftsaktivitäten ist mit sehr verschiedenen Gefährdungsrisiken für die Gesundheit unserer Mitarbeiter verbunden. Diesen Risiken begegnen wir, indem wir zentral definierte Vorgaben einführen und diese dezentral in Verbindung mit individuell auf die jeweilige Geschäftstätigkeit angepassten Programmen anwenden. Zusätzlich zu einer Reihe von Richtlinien, die sich speziell auf Arbeitssicherheit und Gesundheitsmanagement beziehen, fließen damit verbundene Themen in unsere Business Conduct Guidelines, unsere internen Kontrollsysteme sowie unser Risikomanagementsystem ein.

**Sicherheitsrisiken minimieren** – Unsere gesamten Schulungs- und Weiterbildungsprogramme zu elektrischer Sicherheit, Brandschutz, Sicherheit im Straßenverkehr, Erster Hilfe und Evakuierungsübungen sind darauf ausgerichtet, Risiken in Bezug auf Arbeitssicherheit und Gesundheitsmanagement zu minimieren. Wenn sich trotzdem Unfälle ereignen, untersuchen wir die Ursachen gründlich, damit wir geeignete Maßnahmen ergreifen können, derartige Ereignisse in Zukunft zu vermeiden. Diese Maßnahmen beinhalten technische Verbesserungen sowie effektivere Schulungen für Mitarbeiter und deren Vorgesetzte. Die Ursachen aller tödlichen Unfälle werden von externen, unabhängigen Expertenteams untersucht. Wir geben die Ursachen in der betroffenen Einheit (und gegebenenfalls in weiteren Einheiten) bekannt, damit alle nötigen Änderungen an Maschinen, Anlagen und Vorgehensweisen vorgenommen werden können, um eine Wiederholung dieser Unfälle auszuschließen. Besonderes Augenmerk legen wir auf den sicheren Umgang mit Arbeitsstoffen. In diesem Zusammenhang bereiten wir ein weltweit gültiges Programm vor, in dem nach Ersatzstoffen für besonders gefährliche Stoffe gesucht werden soll.

**Gesundheit fördern** – Bisher lag der Schwerpunkt unserer Initiativen zu Arbeitssicherheit und Gesundheitsmanagement auf der Verhütung arbeitsbedingter Gesundheitsrisiken. Diese Initiativen haben wir jetzt um Maßnahmen erweitert, die den allgemeinen Gesundheitszustand und die individuellen Gesundheitsressourcen unserer Mitarbeiter stärken sollen. Zudem haben wir die Position eines *Corporate Medical Directors* geschaffen, eine Funktion mit weltweiter Zuständigkeit. Die Aufgabe des *Corporate Medical Directors* besteht darin, unsere weltweiten Aktivitäten im Gesundheitsmanagement mit den Fachbereichen Gesundheitsförderung (*Health Promotion*), Medizinische Dienste (*Medical Services*) und Sozialberatung (*Social Counseling*) zu bündeln und zu steuern.

### Umweltschutz

#### Wichtige Kennzahlen

|                                                                                                                                                                 | Geschäftsjahresende<br>30. September |      |
|-----------------------------------------------------------------------------------------------------------------------------------------------------------------|--------------------------------------|------|
|                                                                                                                                                                 | 2010                                 | 2009 |
| Mit dem Siemens-Umweltportfolio erzielter Umsatz (in Mrd. EUR)                                                                                                  | 27,6                                 | 26,8 |
| Mit Produkten und Lösungen des Siemens-Umweltportfolios erzielte jährliche Vermeidung von Kohlendioxidemissionen bei unseren Kunden (in Mio. Tonnen; kumuliert) | 267                                  | 214  |

Umweltschutz beinhaltet für Siemens zwei Aspekte: Erstens geht es darum, durch unser Umweltportfolio einen wesentlichen Beitrag zum Klimaschutz zu leisten. Der zweite Aspekt betrifft die Erhöhung der Ressourceneffizienz sowie die Verminderung von Emissionen aus unserer eigenen Geschäftstätigkeit.

### Umweltportfolio

Unser Umweltportfolio steht beispielhaft für unser Bestreben, unsere Geschäftsaktivitäten auf die oben beschriebenen Megatrends, in diesem Fall den Klimawandel, auszurichten. Das Portfolio umfasst Technologien, die negative Auswirkungen auf die Umwelt verringern und den für den Klimawandel maßgeblich verantwortlichen Kohlendioxidausstoß minimieren. Die Bestandteile des Portfolios lassen sich in drei Hauptkategorien einteilen: Erstens Produkte und Lösungen mit besonders hoher Energieeffizienz, wie zum Beispiel Gas- und Dampfturbinen-Kraftwerke, Energiesparlampen oder intelligente Gebäudetechnik. Zweitens Anlagen und Komponenten



für erneuerbare Energien, wie Windturbinen und Solaranlagen. Und drittens Umwelttechnologien zur Wasser- und Luftreinigung.

Das Qualifizieren von Produkten und Lösungen für unser Umweltportfolio basiert auf definierten Prozessen und strengen Kriterien. Das Siemens Sustainability Board entscheidet einmal im Jahr über Änderungen bei der Zusammensetzung des Umweltportfolios. Dies schließt sowohl die Aufnahme neu entwickelter Produkte und Lösungen ein, die unsere Qualifikationskriterien erfüllen, als auch die Aufnahme zusätzlich qualifizierter Produkte und Lösungen, für die der Nachweis der Erfüllung der Qualifikationskriterien zuvor nicht verfügbar war. Für die zuletzt genannten Produkte und Lösungen stellen wir deren im Vorjahr erzielten Umsatz und Beitrag zur Reduzierung der Kohlendioxidemissionen bei unseren Kunden auf vergleichbarer Basis dar. Darüber hinaus entscheidet das Sustainability Board auch über die Herausnahme von Produkten und Lösungen aus dem Umweltportfolio, bei denen die Qualifikationskriterien nicht mehr erfüllt sind. Um sich für die Aufnahme in das Umweltportfolio zu qualifizieren, muss ein Produkt oder eine Lösung in eine der drei oben genannten Kategorien fallen. Die Berechnung der Reduzierung der Kohlendioxidemissionen basiert auf einem spezifischen Vergleich für jedes relevante Produkt beziehungsweise jede relevante Lösung im Umweltportfolio. Für diese Berechnung konzentrieren wir uns dabei auf die Produkte und Lösungen, die einen wesentlichen Einfluss auf die Gesamtsumme der Reduzierung der Kohlendioxidemissionen haben. Um die Vergleichsbasis zu ermitteln und die Reduzierung der jährlichen Kohlendioxidemissionen bei unseren Kunden zu berechnen, verwenden wir grundsätzlich eine der folgenden drei Methoden: direkter Vorher-Nachher-Vergleich der Emissionen, direkter Vergleich mit einer Referenztechnologie oder Vergleich mit der installierten Basis. Die beschriebenen Kriterien und Verfahren werden regelmäßig überprüft und können Änderungen unterliegen.

Mit unserem Umweltportfolio wollen wir unseren Kunden helfen, ihren Kohlendioxidausstoß zu verringern, ihre Energiekosten zu senken sowie dank höherer Produktivität ihren Unternehmenserfolg zu steigern. So haben wir uns bis zum Jahr 2011 das Ziel gesetzt, mit den seit dem Geschäftsjahr 2002 installierten Produkten und Lösungen, die weiter im Einsatz sind, unseren Kunden dabei zu helfen, ihre jährlichen Kohlendioxidemissionen um rund 300 Mio. Tonnen zu verringern. Die bis zum Ende des Geschäftsjahrs 2010 installierten Produkte und Lösungen von Siemens reduzieren den Kohlen-

dioxidausstoß unserer Kunden bereits um rund 267 Mio. Tonnen pro Jahr.

Über diesen Umweltnutzen hinaus bietet uns das Umweltportfolio vor allem die Möglichkeit, an attraktiven Märkten erfolgreich zu sein und profitabel zu wachsen. Bis zum Ende des Geschäftsjahrs 2011 hatten wir uns zum Ziel gesetzt, mit unserem Umweltportfolio rund 25 Mrd. EUR Umsatz zu generieren. Wir haben dieses Ziel deutlich schneller als geplant erreicht. Unter Einbezug von Umsätzen neu entwickelter sowie zusätzlich qualifizierter Produkte und Lösungen betrug unser Umsatz aus dem Umweltportfolio im aktuellen Geschäftsjahr 27,6 Mrd. EUR; er lag damit über dem vergleichbaren Umsatz von 26,8 Mrd. EUR im Geschäftsjahr 2009. Damit entfallen im Geschäftsjahr 2010 schon rund 36% unseres Umsatzes auf unser Umweltportfolio. Da wir weiterhin Wachstumschancen für unser Umweltportfolio sehen, haben wir uns im Rahmen von One Siemens das neue Ziel gesetzt, bis zum Ende des Geschäftsjahrs 2014 mit dem Umweltportfolio einen Umsatz von 40 Mrd. EUR zu übertreffen.

Für das Qualifizieren von Produkten und Lösungen für den Umwelt- und Klimaschutz sowie das Erfassen und Berechnen der Umsätze dieser Produkte und Lösungen und der Menge der durch diese eingesparten Kohlendioxidemissionen existieren keine unternehmensübergreifenden Standards. Dies kann dazu führen, dass die Umsätze aus unserem Umweltportfolio und die Reduzierung der jährlichen Kohlendioxidemissionen bei unseren Kunden nicht vergleichbar sind mit den unter denselben oder ähnlichen Bezeichnungen veröffentlichten Daten anderer Unternehmen. Darüber hinaus unterliegen die Umsätze aus unserem Umweltportfolio sowie die Reduzierung der jährlichen Kohlendioxidemissionen bei unseren Kunden internen Dokumentations- und Prüfungsanforderungen, die sich jedoch von jenen unterscheiden, die unseren Finanzinformationen zugrunde liegen. Es ist möglich, dass wir unsere Regelungen für die Erfassung von Umsätzen aus unserem Umweltportfolio und die Reduzierung der jährlichen Kohlendioxidemissionen bei unseren Kunden in der Zukunft ohne vorherige Ankündigung ändern.

Wie in den Vorjahren haben wir auch für das Geschäftsjahr 2010 eine unabhängige Wirtschaftsprüfungsgesellschaft damit beauftragt, die berichteten Ergebnisse zu unserem Umweltportfolio einer betriebswirtschaftlichen Prüfung zur Erlangung einer begrenzten Sicherheit (*Limited Assurance Engagement*) zu unterziehen. Eine solche betriebswirtschaftliche Prüfung unterscheidet sich von der Jahresabschlussprüfung, wie sie für unseren Konzernabschluss durchgeführt

wurde. Das Ergebnis der betriebswirtschaftlichen Prüfung war positiv, und die unabhängige Wirtschaftsprüfungsgesellschaft hat dieses Ergebnis, insbesondere in Bezug auf den Gesamtumsatz des Umweltportfolios sowie die Menge der dadurch eingesparten Kohlendioxidemissionen, in einer Bescheinigung über eine unabhängige betriebswirtschaftliche Prüfung dokumentiert.

### **Umweltleistung**

Der Schutz der Umwelt ist ein zentraler Bestandteil unserer Unternehmensstrategie. Indem wir hohe Standards für unser Umweltmanagement setzen, begegnen wir den ökologischen Herausforderungen auf der ganzen Welt.

**Umweltmanagement** – Unser weltweites Umweltmanagementsystem basiert auf unseren Business Conduct Guidelines. Spezifische Umweltthemen, zum Beispiel der Umgang mit gefährlichen Stoffen, werden in detaillierteren Bestimmungen und Richtlinien geregelt. Dieses umfassende Regelwerk ist für alle Unternehmen bindend, auf die Siemens einen beherrschenden Einfluss ausüben kann.

Eine der Kernaufgaben des Umweltmanagements besteht darin, unsere Umweltleistung, zum Beispiel im Hinblick auf Energie- und Ressourceneffizienz, zu überwachen. Das von uns verwendete Überwachungssystem erfasst jeden unserer Standorte, der beim Ressourcenverbrauch oder beim Abfallaufkommen bestimmte Schwellenwerte überschreitet. Standorte, die weitere, noch höhere Schwellenwerte überschreiten oder die über anzeige- und genehmigungspflichtige Anlagen verfügen, müssen zusätzlich ein Umweltmanagementsystem anwenden, das der internationalen Norm ISO 14001 entspricht. Unsere Divisionen können zwischen einer externen Zertifizierung ihrer Managementsysteme und einem internen Prüfungsverfahren entscheiden, das externen Zertifizierungsanforderungen entspricht. Am Ende des Geschäftsjahrs 2009 waren an 211 Standorten extern zertifizierte Umweltmanagementsysteme und an elf weiteren Standorten intern zertifizierte Systeme implementiert. Damit hatten zum Ende des Geschäftsjahrs 2009 73 % unserer Standorte, die zur Anwendung eines zertifizierten Managementsystems verpflichtet sind, bereits ein solches System eingeführt, verglichen mit 78 % im Jahr zuvor. Diese Entwicklung ist auf den kontinuierlichen Integrationsprozess neu erworbener Werke zurückzuführen, die nach Ablauf eines dreijährigen Übergangszeitraums im Geschäftsjahr 2009 erstmals als Standorte geführt wurden, die zur Einführung eines Umweltmanagementsystems verpflichtet sind. Unser Ziel ist es, an allen dazu verpflichteten Standorten bis zum Ende des Geschäftsjahrs 2011

ein Umweltmanagementsystem einzuführen. Alle Divisionen haben entsprechende Programme implementiert, dieses Ziel zu erreichen.

**Umweltprogramm** – Wir haben unser aktuelles Umweltprogramm im Geschäftsjahr 2007 eingeführt. Dabei dienen die Daten aus dem Geschäftsjahr 2006 als Vergleichsbasis. Wir überwachen unsere Auswirkungen auf die Umwelt anhand absoluter Werte und berechnen unsere Umweltleistung auf portfoliobereinigter Basis, normiert zum Umsatz der Werke. Im Rahmen unseres Umweltprogramms haben wir es uns zum Ziel gesetzt, bis zum Ende des Geschäftsjahrs 2011 die Umweltleistung in Bezug auf Energie- und Wassereffizienz um 20 % zu verbessern, die Intensität des Kohlendioxidausstoßes um 20 % zu senken sowie die Umweltleistung in Bezug auf Abfall um 15 % zu verbessern. Alle Produktionsstandorte, die zur Anwendung eines Umweltmanagementsystems verpflichtet sind, sind in diese Ziele einbezogen.

Bei der Verfolgung unserer Umweltziele sind wir schon ein gutes Stück vorangekommen. Im Geschäftsjahr 2009 stieg unsere Energieeffizienz um 13 % gegenüber der Vergleichsbasis des Geschäftsjahrs 2006. Dem stand eine Verbesserung um 7 % im Geschäftsjahr 2008 gegenüber. In Bezug auf Primärenergie und Fernwärme hatten wir im Geschäftsjahr 2009 in Relation zur Vergleichsbasis bereits eine Gesamteffizienzsteigerung von 25 % erzielt, gegenüber 21 % im Geschäftsjahr 2008. Unsere Treibhausgasemissionen beliefen sich im Geschäftsjahr 2009 auf 3,785 Mio. Tonnen Kohlendioxidäquivalente, verglichen mit 3,869 Mio. Tonnen im Geschäftsjahr 2008. Die Effizienz unserer Kohlendioxidemissionen verbesserte sich im Geschäftsjahr 2009 gegenüber der Vergleichsbasis um 17 %, verglichen mit einer Verbesserung von 9 % im Vorjahr. Im Geschäftsjahr 2009 hatte sich unsere Umweltleistung im Hinblick auf den Wasserverbrauch bereits um 29 % gegenüber dem Ausgangsjahr verbessert, verglichen mit einer Verbesserung um 21 % im Geschäftsjahr 2008. Im Hinblick auf das Abfallaufkommen verbesserte sich unsere Umweltleistung im Geschäftsjahr 2009 gegenüber der Vergleichsbasis um 12 %, eine Steigerung gegenüber der Verbesserung um 4 % im Jahr zuvor. Unsere Umweltleistung für das Geschäftsjahr 2010 wird erst nach Fertigstellung unseres Konzernabschlusses ermittelt. Das Erreichen der für unsere Umweltleistung gesetzten Ziele wird zu einem gewissen Grad von den makroökonomischen Bedingungen und dem globalen Geschäftsumfeld nach der Rezession abhängen, da unsere Umweltleistung in Relation zu unserer Umsatzentwicklung gemessen wird.

## Compliance

### Wichtige Kennzahlen

|                                                                                | Geschäftsjahresende<br>30. September |       |
|--------------------------------------------------------------------------------|--------------------------------------|-------|
|                                                                                | 2010                                 | 2009  |
| Kumulierte <sup>1</sup> Teilnehmerzahl an webbasierten Schulungen (in Tausend) | 228                                  | 140   |
| Kumulierte <sup>1</sup> Teilnehmerzahl an persönlichen Schulungen (in Tausend) | 104                                  | 79    |
| Anzahl Anfragen an »Ask us« Helpdesk                                           | 3.077                                | 3.992 |
| Anzahl Meldungen an »Tell us« Helpdesk und Ombudsmann                          | 582                                  | 565   |
| darin mit Anfangsverdacht <sup>2</sup>                                         | 502                                  | 439   |

<sup>1</sup> Seit Dezember 2007.

<sup>2</sup> Erfordert weitere interne Untersuchungen, um festzustellen, ob ein Verstoß vorliegt.

Unser Compliance-Programm soll sicherstellen, dass unsere Geschäftspraktiken weltweit im Einklang mit den gesetzlichen Bestimmungen und unseren internen Regelungen stehen. Diesem Zweck dienen die drei Säulen unseres Compliance-Programms: *Verbeugen*, *Erkennen* und *Reagieren*. Wir arbeiten kontinuierlich daran, Compliance weiter in unsere Geschäftsaktivitäten zu integrieren und unsere Bemühungen bei der Bekämpfung der Korruption gemeinsam mit anderen Marktteilnehmern und staatlichen Akteuren (*Collective Action*) weiter zu stärken.

Unsere Business Conduct Guidelines stecken den ethisch-rechtlichen Rahmen für unsere Geschäftsaktivitäten ab. Nach ihrer Überarbeitung haben wir eine spezielle webbasierte Schulung für die Business Conduct Guidelines entwickelt, die wir Siemens-weit in 11 Sprachversionen eingeführt haben. Ein weiterer Schwerpunkt unserer Trainingsaktivitäten im Berichtszeitraum lag auf dem Ausbau der Trainings zum Wettbewerbsrecht.

Das Compliance Helpdesk »Ask us« steht unseren Mitarbeitern für alle Fragen zum Thema Compliance zur Verfügung. Zusätzlich können alle Mitarbeiter ihre Fragen auch direkt an den für ihre Einheit verantwortlichen Compliance Officer richten. Wir glauben, dass der Rückgang der an das Compliance Helpdesk »Ask us« gerichteten Anfragen auf 3.077 im Geschäftsjahr 2010, verglichen mit 3.992 Anfragen im Vorjahr, auch auf die bereits erreichte hohe Stabilität unseres Compliance-Programms sowie auf die in zunehmendem Maße gestärkten Kompetenzen innerhalb unserer einzelnen Unternehmenseinheiten zurückzuführen ist.

Die Effektivität unserer vorbeugenden Compliance-Schulungsmaßnahmen messen wir anhand regelmäßiger Mitarbeiterbefragungen. Im Geschäftsjahr 2010 haben wir ihren Umfang erhöht, indem wir sie in den oben beschriebenen Siemens Global Engagement and Compliance Survey 2010 integriert haben. Hierdurch konnten wir die Mitarbeiterbefragung von einer repräsentativen Auswahl auf eine weltweite Umfrage unter dem Großteil der Siemens-Mitarbeiter ausweiten. Wie in den Jahren zuvor sind die Compliance-bezogenen Ergebnisse dieser Befragungen ein Bestandteil unseres Vergütungssystems für das obere Management.

Das Compliance Helpdesk »Tell us« und der unabhängige Ombudsmann bilden zwei geschützte Beschwerdewege, über die sowohl unsere Mitarbeiter als auch Dritte Verstöße gegen externe und interne Regeln melden können. Diese Berichte werden dann an unsere Compliance-Organisation weitergeleitet. Im laufenden Geschäftsjahr belief sich die Anzahl der Meldungen an das Helpdesk »Tell us« und den Ombudsmann auf 582, verglichen mit 565 Meldungen im Vorjahr. Im Geschäftsjahr 2010 bestand bei 502 dieser Meldungen ein Anfangsverdacht, der weitere Befragungen oder Untersuchungen zur Klärung der gemeldeten Vorfälle nach sich zog (Geschäftsjahr 2009: 439).

Im Geschäftsjahr 2010 hat Siemens seine Compliance-Organisation weiter gestärkt, indem sie ihren Fokus stärker auf operative Aufgaben richtet. Der *Chief Compliance Officer* steuert künftig alle operativen und vertrieblichen Themen. Die neu geschaffene Position des *Chief Counsel Compliance* wird für alle rechtlichen Aspekte der Compliance zuständig sein.

Auch im Geschäftsjahr 2011 werden wir weiter daran arbeiten, Compliance noch stärker als Aufgabe unserer Geschäfte im Unternehmen zu verankern. Projekte zur weiteren Optimierung unserer Compliance-Risiko-Analysen sowie anderer Compliance-bezogener Prozesse stellen diesbezüglich unsere wichtigsten Vorhaben dar. Unsere *Collective-Action*-Bemühungen und unsere Siemens-Integritätsinitiative (*Siemens Integrity Initiative*), die Organisationen und Projekte unterstützt, die sich dem Kampf gegen Korruption und Betrug auf der Basis gemeinsamen Handelns, Aufklärungsarbeit und Schulungen verschrieben haben, sind Beispiele für unseren kontinuierlichen Einsatz zur Bekämpfung von Korruption auf unseren Märkten.

Am 13. Oktober 2010 erhielt das Unternehmen den zweiten Jahresbericht des Compliance-Monitors Dr. Theo Waigel, den Siemens im Rahmen einer Einigung mit US-amerikanischen Behörden im Dezember 2008 beauftragt hatte. Wie in der Einigung mit der US-Börsenaufsicht (Securities and Exchange Commission, SEC) und dem US-amerikanischen Justizministerium (Department of Justice, DOJ) festgelegt, enthält der zweite Jahresbericht des Compliance-Monitors erstens eine Bewertung der Empfehlungen aus dem ersten Jahresbericht, zweitens angemessen konzipierte neue Empfehlungen zur Verbesserung der Effektivität des Programms von Siemens zur Sicherstellung der Einhaltung der Antikorruptionsgesetze sowie drittens eine Bestätigung des Monitors, dass das Siemens-Compliance-Programm, einschließlich der zugehörigen internen Regeln und Prozesse, angemessen konzipiert und implementiert ist, damit Verstöße gegen Antikorruptionsgesetze bei Siemens aufgedeckt und verhindert werden können.

### Corporate Citizenship

Siemens Corporate Citizenship legt den Schwerpunkt auf Aktivitäten, die über unsere eigentliche Geschäftstätigkeit hinausgehen und langfristigen gesellschaftlichen Nutzen stiften. Um dieser Verpflichtung nachzukommen, setzen wir viele verschiedene Ressourcen ein, wobei den speziellen Kompetenzen unseres Unternehmens eine besondere Rolle zukommt. Wir engagieren uns aktiv in sozialen und ökologischen Projekten, und wir unterstützen insbesondere das freiwillige Engagement unserer Mitarbeiter. Die Grundlage dieses Engagements ist unser Bekenntnis zum Global Compact sowie zu den Millenniums-Entwicklungszielen der Vereinten Nationen.

Unsere Corporate-Citizenship-Aktivitäten konzentrieren sich auf drei Bereiche: Umweltschutz, Bildung sowie soziale und humanitäre Hilfe.

- > Wir setzen uns mit unseren Corporate-Citizenship-Aktivitäten für den Schutz der Umwelt ein.
- > Wir fördern die Bildung und Ausbildung junger Menschen – insbesondere auf den Gebieten Mathematik, Informatik einschließlich Computerwissenschaften, Naturwissenschaften und Technologie.
- > Wir stehen im fortlaufenden Dialog mit bedeutenden Meinungsbildnern – insbesondere dann, wenn wir der Gesellschaft mit unserer Expertise dabei helfen können, Entscheidungen auf Grundlage fundierter Informationen zu treffen. Wir arbeiten daran, die Lebensbedingungen in den Gesellschaften zu verbessern, in denen wir tätig sind. Wir leisten technische und humanitäre Hilfe nach Naturkatastrophen.
- > Zusätzlich fördern wir zeitgenössische Kunst und Kultur.

**Die Siemens Stiftung** – Die gemeinnützige Siemens Stiftung wurde im Herbst 2008 mit einem Startkapital von 390 Mio. EUR gegründet. Sie verstärkt nachhaltig die mehr als 160-jährige Tradition des gesellschaftlichen Engagements der Siemens AG. Am 1. Januar 2009 nahm die Stiftung ihre Arbeit auf. Sie ist mit Projekten zur Stärkung der Zivilgesellschaft insbesondere in Afrika, Lateinamerika und Europa tätig. Ziel ist es, einen langfristigen Beitrag zur Minderung von Armut und zu höherer Chancengleichheit zu leisten. Die Stiftung arbeitet auf drei Gebieten: Sie unterstützt den Ausbau der Grundversorgung sowie die Verbesserung von Sozialstrukturen, initiiert Bildungsprojekte und trägt zur Weiterentwicklung kultureller Identität bei. Maßgeblich ist für die Stiftungsarbeit, Hilfe zur Selbsthilfe zu fördern. Die Projektentwicklung der Siemens Stiftung erfolgt in enger Zusammenarbeit mit lokalen und internationalen Kooperationspartnern sowie in Allianz mit anderen Siemens-Stiftungen in Argentinien, Brasilien, Frankreich, Kolumbien und den USA.

## WIRTSCHAFTLICHE RAHMENBEDINGUNGEN

### Gesamtwirtschaftliche Entwicklung

Nach der schwersten Wirtschaftskrise seit Ende des Zweiten Weltkriegs, die nach Angaben von IHS Global Insight zu einem Rückgang des weltweiten **realen Bruttoinlandsprodukts (BIP)** um 1,8% im Jahr 2009 führte, erholte sich die Weltwirtschaft im ersten Halbjahr des Kalenderjahrs 2010 schneller und dynamischer als erwartet. Mit dem Auslaufen der positiven Impulse aus dem Lagerzyklus und den staatlichen Konjunkturprogrammen lässt diese Wachstumsdynamik in der zweiten Jahreshälfte etwas nach. Insgesamt erwartet IHS Global Insight für 2010 eine Zunahme des weltweiten BIP um 3,8%

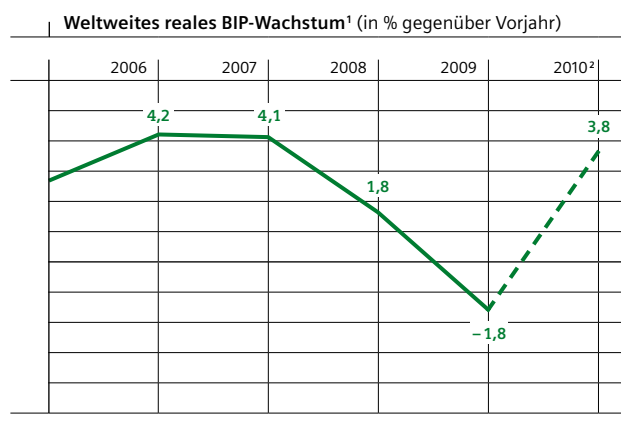

<sup>1</sup> Daten von Global Insight Inc. vom 15. Oktober 2010; Angabe der Wachstumsraten für Kalenderjahre.  
<sup>2</sup> Schätzung für das Kalenderjahr 2010.

Geografisch betrachtet, weist die Region **Europa, Gemeinschaft Unabhängiger Staaten (GUS), Afrika, Naher und Mittlerer Osten**, die 2009 den stärksten Einbruch des Bruttoinlandsprodukts unserer drei Berichtsregionen verzeichnete, in 2010 mit einer voraussichtlichen Steigerung des BIP um 2,4% das geringste Wachstum auf. Innerhalb der Region wachsen die Länder des Nahen und Mittleren Ostens sowie Afrikas im Jahr 2010 am schnellsten. Viele dieser Länder profitieren 2010 von einer Erholung der Rohstoffpreise. Die Länder unseres Clusters Russland/Zentralasien, die besonders stark von der Wirtschaftskrise betroffen waren, erholen sich allmählich. Für Russland erwartet IHS Global Insight nach einem Rückgang des BIP von 7,9% im Vorjahr ein Wachstum von 4,2% in 2010. Die positiven Effekte aus den gegenüber 2009 gestiegenen Rohstoffpreisen werden im laufenden Jahr durch die Spätfolgen der Finanzkrise wie auch durch eine längere Hitze- und Trockenheitsperiode gedämpft. Innerhalb Europas läuft die Wirtschaftsentwicklung stark auseinander. Während sich die meisten Länder Mittel- und Osteuropas im Jahr 2010 langsam von der Wirtschaftskrise erholen, schrumpfen oder stagnieren die Volkswirtschaften einiger von der Staatsschuldenkrise betroffener Länder Süd- und Westeuropas. Für Deutschland erwartet IHS Global Insight im laufenden Jahr ein Wachstum des BIP um 3,3%, nach einem Rückgang um 4,7% im Vorjahr. Die deutsche Wirtschaft, die im vergangenen Jahr unter dem Einbruch des Welthandels litt, profitiert im Jahr 2010 von einer starken Nachfrage nach hochwertigen Investitionsgütern aus dem Ausland. Auch der Export von Automobilen nimmt 2010 trotz auslaufender staatlicher Förderprogramme, insbesondere aufgrund der starken Nachfrage aus Asien, kräftig zu. Von der wirtschaftlichen Expansion Deutschlands profitiert auch eine Reihe anderer europäischer Länder, die eng mit der deutschen Exportindustrie verbunden sind.

Für die Region **Amerika** erwartet IHS Global Insight im Jahr 2010 ein Wachstum des BIP um 3,2%, nach einem Rückgang um 2,4% im Vorjahr. Die Mehrzahl der lateinamerikanischen Länder wird das BIP in 2010 voraussichtlich deutlich steigern. Zu den Wachstumstreibern gehört insbesondere Brasilien. Hier wird in 2010 ein Wachstum des BIP um 7,4% erwartet, nach einem leichten Rückgang um 0,2% im Vorjahr. Deutlich geringere Wachstumsimpulse gehen von den USA aus. Nach einem Rückgang des BIP um 2,6% im Vorjahr erwartet IHS Global Insight 2010 eine Steigerung um den gleichen Prozentsatz, wobei sich die Wachstumsentwicklung in der zweiten Jahreshälfte merklich abgeschwächt hat. Aufgrund der wachsenden

Arbeitslosigkeit sowie einer Erhöhung der Sparquote der privaten Haushalte steigt der private Konsum nur sehr verhalten. Die Probleme auf dem Immobilienmarkt – dem Auslöser der Weltwirtschaftskrise – haben sich nach dem Auslaufen von Steuererleichterungen wieder verstärkt. Das Wachstum der USA wird zudem durch ein wesentliches Leistungsbilanzdefizit gebremst, da die Importe stärker als die Exporte steigen.

Das BIP der Region **Asien, Australien**, das auch während der Wirtschaftskrise expandierte, legt 2010 mit einem voraussichtlichen Wachstum von 6,5% kräftig zu. Dieser Wachstumsschub wurde zunächst von staatlichen Konjunkturprogrammen getrieben. Im Zuge der Erholung der Weltwirtschaft hat aber auch der Export wieder zugenommen. Zudem unterstützt eine steigende Verbrauchernachfrage aus den Schwellenländern die Wachstumsentwicklung dieser Region. Für China erwartet IHS Global Insight nach einer Zunahme des BIP um 9,1% im Jahr 2009 ein Wachstum von 10,3% in 2010. China erweist sich damit als wichtige Stütze der Weltwirtschaft. Die hohe Dynamik der ersten Hälfte des Kalenderjahrs 2010 wird in der zweiten Jahreshälfte aufgrund abnehmender Impulse aus Konjunkturprogrammen, der Drosselung des Kreditwachstums durch die Notenbank sowie der Wachstumsschwäche wichtiger Abnehmerländer voraussichtlich nachlassen. Indien, das von seinem großen Binnenmarkt und seiner geringen Exportabhängigkeit profitiert, weist eine ungebrochene Wachstumsdynamik auf. IHS Global Insight erwartet für 2010 eine Zunahme des BIP um 8,2%, nach 6,8% im Vorjahr.

**Reales BIP-Wachstum<sup>1</sup> je Region**  
(in % gegenüber Vorjahr)

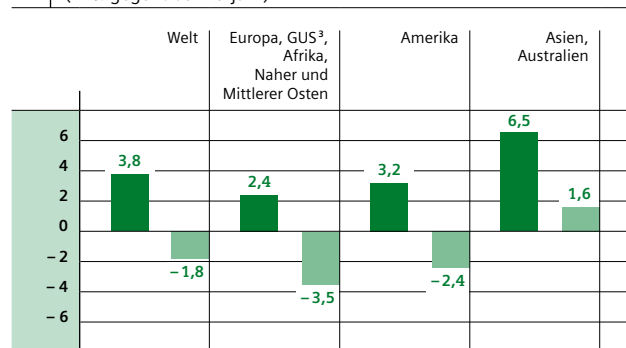

■ 2010<sup>2</sup> ■ 2009

- 1 Daten von Global Insight Inc. vom 15. Oktober 2010; Angabe der Wachstumsraten für Kalenderjahre.
- 2 Schätzung für das Kalenderjahr 2010.
- 3 Gemeinschaft Unabhängiger Staaten.



Eine für Siemens als Produzenten wichtige Kennzahl stellt die **Wertschöpfung des verarbeitenden Gewerbes** als Komponente der Entstehungsrechnung des Bruttoinlandsprodukts dar. Hier erwartet IHS Global Insight nach einem Rückgang um 6,5% im Vorjahr eine reale Steigerung um 10,1% in 2010. Treiber des Wachstums ist die Region Asien, Australien mit einer erwarteten realen Steigerung um 15,4% gegenüber dem Vorjahr.

Eine für Siemens als Anlagen- und Infrastrukturanbieter wichtige Kennzahl ist der Verlauf der **Bruttoanlageinvestitionen**, einer Komponente der Verwendung des Bruttoinlandsprodukts. Ihre Entwicklung weist eine starke Abhängigkeit von zyklischen Konjunkturschwankungen auf. IHS Global Insight geht nach einem realen Rückgang der Bruttoanlageinvestitionen um 7,1% im Jahr 2009 von einem Wachstum um 5,0% in 2010 aus. Für unsere umsatzstärkste Region **Europa, GUS, Afrika, Naher und Mittlerer Osten** erwartet IHS Global Insight nach einem Rückgang der Bruttoanlageinvestitionen um 11,2% im Vorjahr in 2010 ein Wachstum von lediglich 0,6%. In der Region **Amerika** werden die Bruttoanlageinvestitionen in 2010 voraussichtlich um 4,7% wachsen, während sie im Vorjahr um 13,3% sanken. Innerhalb dieser Region ist besonders die Entwicklung in Brasilien bemerkenswert. Hier geht IHS Global Insight im Jahr 2010 von einem Wachstum um 16,9% aus, nach einem Rückgang um 9,9% in 2009. Die USA, die im Jahr 2009 einen drastischen Rückgang der Bruttoanlageinvestitionen verzeichneten, werden in 2010 voraussichtlich nur ein Wachstum um 2,5% erzielen. Die Region **Asien, Australien** war bei den Bruttoanlageinvestitionen in 2009 die einzige Wachstumsregion, mit einer Zunahme von 4,3%. In 2010 beschleunigt sich das Wachstum nach Prognosen von IHS Global

Insight auf 9,8%. Innerhalb der Region soll das Wachstum der Bruttoanlageinvestitionen in China von 17,7% im Vorjahr auf immer noch sehr hohe 15,4% zurückgehen, während sich das Wachstum der Bruttoanlageinvestitionen in Indien von 5,2% im Jahr 2009 auf voraussichtlich 10,1% in 2010 beschleunigt.

Die hier dargestellten, zum Teil geschätzten Daten für das Bruttoinlandsprodukt sowie die Bruttoanlageinvestitionen basieren auf Angaben von IHS Global Insight vom 15. Oktober 2010, die Daten zur Wertschöpfung des verarbeitenden Gewerbes basieren auf Angaben von IHS Global Insight, die dem Bericht vom 22. Oktober 2010 entnommen sind. Die Daten wurden von uns nicht unabhängig verifiziert.

Zu den für Siemens wesentlichen Währungen gehören neben der Gemeinschaftswährung der Europäischen Währungsunion, dem Euro (EUR), auch der US-Dollar und das Britische Pfund. Der Aufwertungsstrend des EUR gegenüber dem US-Dollar und dem Britischen Pfund, der zur Mitte des Geschäftsjahrs 2009 begann, setzte sich zu Beginn des ersten Quartals des Geschäftsjahrs 2010 fort. Zum Ende des ersten Quartals des Geschäftsjahrs 2010 begann eine deutliche Abwertung des EUR, die gegenüber dem US-Dollar stärker ausfiel als gegenüber dem Britischen Pfund. Ursache für die Abwertung des EUR war insbesondere die sich im Frühjahr 2010 verschärfende Staatsschuldenkrise einiger süd- und westeuropäischer Mitgliedsländer der Europäischen Währungsunion, auf die der Internationale Währungsfonds und die Europäische Union mit Stützungsprogrammen reagierten. Die zunehmende Sorge um die Stabilität des Aufschwungs in den USA und in Großbritannien und eine gleichzeitig robuste Konjunktorentwicklung in den europäischen Kernstaaten führten ab Juni 2010 zu

**Wechselkursentwicklung** (Index: Geschäftsjahresbeginn 2006 = 100)

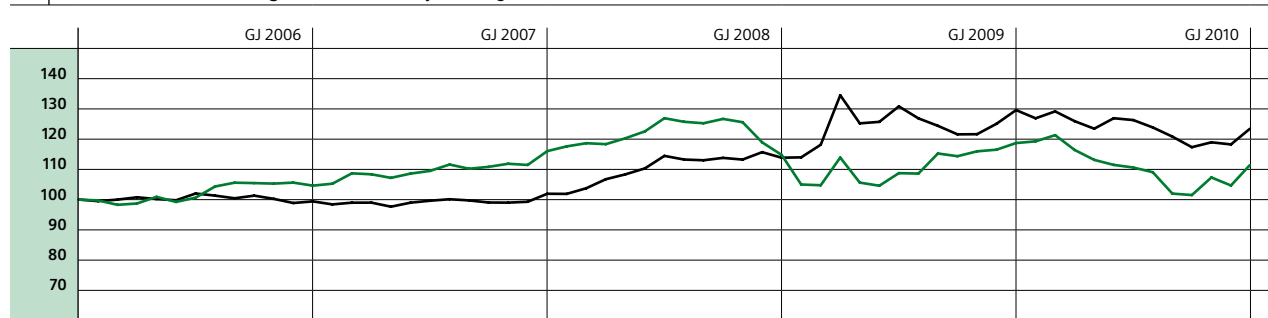

Quelle: Bloomberg

einer Aufwertung des EUR gegenüber den Währungen beider Länder. Dieser Trend verstärkte sich zum Ende des Geschäftsjahrs 2010 aufgrund der Erwartung zusätzlicher expansiver geldpolitischer Maßnahmen der Zentralbanken in den USA und in Großbritannien.

Unsere Geschäfte sind auch von der Entwicklung der Rohstoffpreise abhängig. Für uns wesentliche Rohstoffe, die unsere Kosten maßgeblich beeinflussen, sind Kupfer, verschiedene Stahlsorten und -formate sowie Aluminium. Zudem sind wir bei Edelstahl stark von der Preisentwicklung für Nickel und Chromlegierungen abhängig.

Der Preis für Kupfer (in EUR je Tonne) nahm seit dem Beginn des Geschäftsjahrs 2010 um ungefähr 41% zu. Noch erheblich stärker nahm der Kupferpreis gegenüber den niedrigsten Werten im Dezember 2008 mit einer Steigerung um 200% zu. Die Entwicklung des Kupferpreises wird sowohl durch die Angebots- und Nachfragesituation als auch durch spekulative Einflüsse an den Rohstoffmärkten getrieben. Die Preisentwicklung ist von der Annahme einer künftigen Verknappung des Angebots geprägt. Da Kupfer an zahlreichen Standorten produziert und – wie beispielsweise an der London Metal Exchange – gehandelt wird, sehen wir eher ein Preis- als ein Versorgungsrisiko.

Der Preis für Aluminium nahm im Lauf des Geschäftsjahrs 2010 um ungefähr 33% und gegenüber den Tiefständen im Dezember 2008 um ungefähr 73% zu. Die Entwicklung des

Aluminiumpreises wird vorwiegend durch gestiegene Nachfrage sowie insbesondere höhere Energiepreise getrieben, während spekulative Einflüsse nur zwischenzeitliche Effekte auf den Aluminiumpreis hatten. Wie bei Kupfer sehen wir eher ein Preis- als ein Versorgungsrisiko.

Der Stahlpreis nahm im abgelaufenen Geschäftsjahr bei steigender Produktion um ungefähr 27% sowie gegenüber den von CRU (einer unabhängigen Forschungs- und Beratungsorganisation unter anderem in den Bereichen Bergbau und Metalle) gemeldeten Tiefständen im April 2009 um etwa 53% zu, während die Nachfrage hinter dieser Entwicklung zurückblieb. Die Preise werden im Allgemeinen durch steigende Rohstoffpreise, zum Beispiel erheblich höhere Kosten für Eisenerz, getrieben. Der Markt erlebte eine Reihe kurzfristiger zyklischer Bewegungen aufgrund des Zusammenwirkens von tatsächlicher Nachfrage, der Aufstockung von Lagerbeständen sowie einer Reihe verfrühter Versuche von Stahlherstellern, die Preise anzuheben. Es wird erwartet, dass das neue Verfahren der Preisfestlegung zwischen Eisenerzproduzenten und Stahlherstellern (Wechsel von jährlicher auf quartalsweise Preisvereinbarung) in Zukunft zu einer höheren Flexibilität und Volatilität der Stahlpreise führen wird.

Die stärkste Abhängigkeit von der Preisentwicklung von Kupfer und verwandten Produkten sowie von Stahl und Edelstahl besteht in den Sektoren Industry und Energy. Die Entwicklung der Aluminiumpreise hat den größten Einfluss auf den Sektor Industry. Darüber hinaus ist Siemens insgesamt von der Ent-

Rohstoffpreisentwicklung (Index: Geschäftsjahresbeginn 2006 = 100)

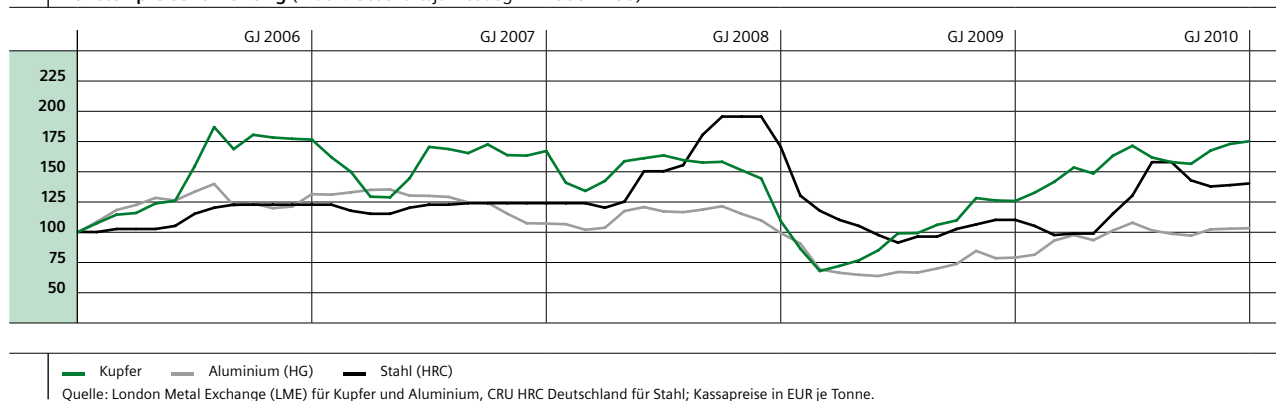

wicklung der Energiepreise direkt (Strom, Gas, Öl) und indirekt (Energieverbrauch in Herstellungsprozessen der Lieferanten) betroffen.

Siemens reduziert die Preisrisiken im Projekt- und Produktgeschäft durch verschiedene Maßnahmen, wie die Vereinbarung von langfristigen Verträgen mit Lieferanten, die Absicherung durch Hedging-Instrumente und andere Sicherungsgeschäfte sowie die Vereinbarung von Preisgleitklauseln mit Kunden.

### Marktentwicklung

Marktuntersuchungen von IHS Global Insight vom Juli 2010 zufolge steigen die nominalen Investitionen im Jahr 2010 in fast allen für unsere Sektoren und Siemens IT Solutions and Services wesentlichen Marktsegmenten. An der Mehrzahl dieser Märkte kann das Investitionswachstum die zum Teil starken Einbrüche der Investitionstätigkeit im Vorjahr mehr als ausgleichen. Maßgeblich hierfür ist die dynamische Entwicklung in den Schwellenländern, insbesondere in China, während die Investitionsvolumina in einer Reihe von Industrieländern im Jahr 2010 weiter schrumpfen.

An den wesentlichen Märkten für unseren Sektor **Industry** steigen die Bruttoanlageinvestitionen im Jahr 2010 nach dem von der Wirtschaftskrise ausgelösten Rückgang im Vorjahr in den meisten Segmenten wieder kräftig an. Die höchste Wachstumsrate gegenüber dem Vorjahr erzielt voraussichtlich der Metall- und Bergbausektor mit einem prozentual mittleren zweistelligen Wachstum der Investitionen, nach einem Rückgang um rund 5% im Vorjahr. Hier wirkt sich die mit der wirtschaftlichen Erholung einhergehende steigende Nachfrage nach Rohstoffen auf Investitionen sowohl für die Erzeugung als auch die Verarbeitung positiv aus. Für den Maschinenbau und die Öl- und Gasindustrie werden für das Jahr 2010 Wachstumsraten im prozentual unteren zweistelligen Bereich erwartet. Die Investitionen im Maschinenbau wuchsen im Jahr 2009, gestützt von China, das den weltweit größten Maschinenbausektor hat, um rund 9%. Für das Jahr 2010 wird eine leichte Abschwächung des Investitionswachstums in China auf ein nach wie vor sehr hohes Niveau erwartet. Gleichzeitig stabilisieren sich die Maschinenbauinvestitionen in anderen Ländern. Die Investitionen in der Öl- und Gasindustrie hingegen waren im Vorjahr stark rückläufig. Der für

das Jahr 2010 prognostizierte Anstieg wird voraussichtlich nicht ausreichen, den Rückgang des Vorjahrs auszugleichen. In der Automobilindustrie und chemischen Industrie werden für 2010 Wachstumsraten von rund 10% erwartet. Die Investitionen in der Automobilindustrie gingen im Vorjahr, insbesondere aufgrund der Entwicklung in den Industrieländern, um rund 8% zurück. Für das Jahr 2010 wird für eine Reihe der Industrieländer eine Stabilisierung aufgrund von Ersatzinvestitionen erwartet. Sehr dynamisch entwickelt sich voraussichtlich das Wachstum in Brasilien, während sich das Wachstum in China auf einem sehr hohen Niveau leicht abschwächt. Auch in der chemischen Industrie, deren Investitionen im Jahr 2009 geringfügig zulegen, führen die Schwellenländer das Wachstum an, während die Investitionen in einigen Industrieländern wie Japan und den USA nach deutlichen Rückgängen im Vorjahr im Jahr 2010 leicht steigen oder stagnieren. Bei den Transportdienstleistungen, in der Post- und Logistikbranche, am Markt für Elektronik und Elektrotechniksysteme sowie in der Papier- und Zellstoffindustrie, deren Investitionen im Vorjahr jeweils im prozentual mittleren einstelligen Bereich schrumpften, wird für das Jahr 2010 ein Wachstum der Investitionen um jeweils rund 9% erwartet. Auch die von Konjunkturunbrüchen weniger stark betroffene Nahrungs- und Genussmittelindustrie, die ihre Investitionen im Jahr 2009 stabil hielt, wird 2010 ihre Investitionen voraussichtlich ebenfalls um rund 9% steigern. Positiv wirkt sich das wieder gestiegene Vertrauen der Konsumenten aus. Die Transport- und Infrastrukturindustrie steigert ihre Investitionen in 2010 voraussichtlich um rund 7%, nach einem Rückgang um rund 4% im Vorjahr. Für die Transportanlagenbranche wird nach einer Stagnation im Vorjahr für 2010 ein Anstieg der Investitionen um rund 5% erwartet. Auch der Einzelhandel, der vom gestiegenen Konsumentenvertrauen profitiert, wird seine Investitionen in diesem Jahr voraussichtlich um rund 5% steigern, wodurch das im Vorjahr um rund 6% gesunkene Investitionsvolumen nicht ausgeglichen werden kann. Weiter rückläufig wird voraussichtlich die Investitionsentwicklung in der Bau- und Immobilienindustrie sein. Nach einem Rückgang um rund 10% im Vorjahr erwartet IHS Global Insight für 2010 ein um weitere 2% sinkendes Investitionsvolumen. Ursächlich hierfür sind erhebliche weitere Reduzierungen der Investitionstätigkeit an etablierten Märkten, insbesondere in Europa, während in den Schwellenländern ein anhaltend kräftiges Wachstum erwartet wird.

Unser Sektor **Energy** profitiert in 2010 ebenfalls von verbesserten Bedingungen an einer Reihe von Märkten, die oben für den Sektor Industry erwähnt wurden. Hierzu gehören die chemische Industrie, die Post- und Logistikbranche, der Groß- und Einzelhandel, die Transportdienstleistungen sowie die Öl- und Gasindustrie. Darüber hinaus wirkt sich in 2010 die erwartete Erholung der Investitionstätigkeit bei den Versorgern positiv aus. Nach einem Rückgang um rund 6% im Vorjahr erwartet IHS Global Insight für 2010 einen Anstieg um rund 10%, der insbesondere von der positiven Entwicklung in den Schwellenländern Asiens getrieben wird.

Die Bruttoanlageinvestitionen an den internationalen Gesundheitsmärkten, die von unserem Sektor **Healthcare** bedient werden, werden 2010 voraussichtlich um rund 4% steigen; im Vorjahr sanken sie um rund 6%. Auch hier sind es die Schwellenländer, die ihre Investitionen deutlich ausweiten, während die Investitionen an einigen der für uns bedeutendsten Märkte, wie den USA oder Deutschland, entweder nur geringfügig steigen oder weiter schrumpfen.

Der öffentliche Sektor, der ein wesentlicher Kunde für **Siemens IT Solutions and Services** ist, wird die Bruttoanlageinvestitionen voraussichtlich um rund 5% im Vergleich zum Vorjahr steigern. Für die für Siemens IT Solutions and Services ebenfalls wichtige Finanzdienstleistungsbranche wird eine Zunahme der Bruttoanlageinvestitionen in 2010 um rund 6% erwartet.

## Geschäftsjahr 2010 – Finanzieller Überblick

Im Geschäftsjahr 2010 sind wir aus der Wirtschaftskrise als ein noch stärker fokussiertes Unternehmen mit einer starken operativen Dynamik hervorgegangen. Der Gewinn nach Steuern und das Ergebnis Summe Sektoren lagen über den Ergebnissen des Vorjahrs. Alle drei Sektoren steigerten den Free Cash Flow erheblich gegenüber dem Vorjahr. Daher stieg auch der Free Cash Flow von Siemens deutlich an. Wir kehrten außerdem beim Auftragseingang nach der Wirtschaftskrise – insbesondere in unseren kurzzyklischen Geschäften – wieder zu Wachstum zurück und erzielten einen Umsatz nahe dem Vorjahresniveau. Dies ist auch auf die stetige Umwandlung unseres hohen Auftragsbestands in laufendes Geschäft zurückzuführen. Die Entwicklung des Auftragseingangs verlief in der zweiten Hälfte des abgelaufenen Geschäftsjahrs deutlich robuster als in der ersten Hälfte, da unsere Sektoren die Möglichkeiten der verbesserten Marktbedingungen konsequent nutzten.

Zusätzlich zu anderen Portfolioaktivitäten begannen wir im Geschäftsjahr 2010 eine strategische Neuausrichtung unseres IT-Geschäfts mit dem Ziel, dessen Wettbewerbsposition zu stärken. Darüber hinaus nahmen wir eine Neueinschätzung der Wachstumspotenziale der Geschäfte vor, die wir erworben hatten, um unsere Division Diagnostics zu bilden. Beide Maßnahmen belasteten unsere für das Geschäftsjahr berichteten Ergebnisse. Belastungen für den Abschluss von Personalanpassungsmaßnahmen führten zu einem Verlust bei Siemens IT Solutions and Services; eine hohe Wertminderung von Geschäfts- und Firmenwerten bei Diagnostics führte zu einem Gewinnrückgang beim Sektor Healthcare im Vergleich zum Vorjahr.

**Wir erreichten einen im Jahresvergleich stabilen Umsatz.** Auf Sektorebene blieb der Umsatz gegenüber dem Geschäftsjahr 2009 nahezu unverändert. Industry, unser am Volumen gemessen größter Sektor, glich Rückgänge im langzyklischen Geschäft durch Umsatzsteigerungen in seinen sich schneller wieder erholenden kurzzyklischen Geschäften aus. Der Umsatz des Sektors Healthcare nahm über das Geschäftsjahr hinweg stetig zu und übertraf das Vorjahresniveau. Der Umsatz des Sektors Energy sank in der ersten Hälfte des Geschäftsjahrs, erholte sich aber in der zweiten Geschäftsjahreshälfte. Der geringfügige Umsatzrückgang für Siemens insgesamt war vorwiegend durch einen geringeren Umsatz bei Siemens

IT Solutions and Services sowie Portfoliobereinigungen bei den Zentral gesteuerten Portfolioaktivitäten bedingt. Der Umsatz im Geschäftsjahr 2010 war von positiven Währungsumrechnungseffekten begünstigt. Regional betrachtet, stieg der Umsatz in der Region Asien, Australien um 10% und glich damit einen Umsatzrückgang in der wesentlich größeren Region Europa, GUS, Afrika, Naher und Mittlerer Osten großenteils aus. Der Umsatz in Amerika war fast unverändert, da ein zweistelliges Wachstum in den Schwellenländern der Region einen Umsatzrückgang in den USA nahezu kompensierte.

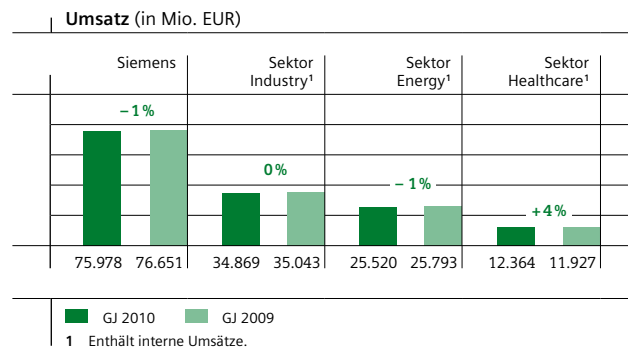

**Wir kehrten wieder zu Wachstum beim Auftragseingang zurück.** Die gleichen Faktoren, die die Umsatzentwicklung bestimmten, beeinflussten auch die Entwicklung des Auftragseingangs. Die kurzzyklischen Geschäfte von Industry lieferten im Jahresvergleich den größten Beitrag zum Wachstum des Auftragseingangs des Sektors. Der Sektor Energy schloss sein starkes zweites Halbjahr mit einem prozentual hohen zweistelligen Wachstum im vierten Quartal gegenüber dem gleichen Quartal des Vorjahreszeitraums ab. Der Auftragseingang bei Healthcare nahm im Jahresverlauf stetig zu. Regional betrachtet, wich die Entwicklung des Auftragseingangs etwas

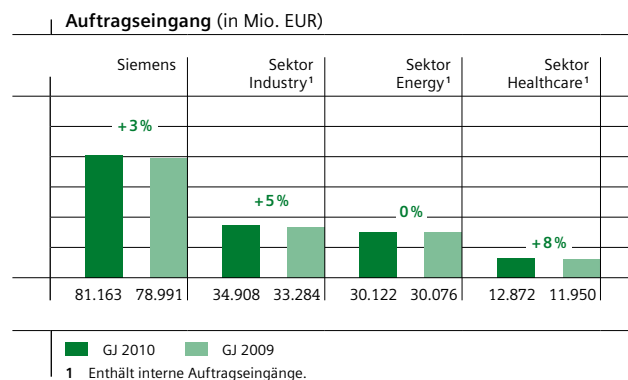



von der des Umsatzes ab. In der Region Amerika stieg der Auftragseingang um 18% mit zweistelligen Wachstumsraten sowohl in den USA als auch in den Schwellenländern der Region. Zusammen mit einem soliden Wachstum in Asien, Australien konnten diese beiden Regionen einen niedrigeren Auftragseingang in der Region Europa, GUS, Afrika, Naher und Mittlerer Osten ausgleichen.

**Wir steigerten das Ergebnis Summe Sektoren auf 7,789 Mrd. EUR.** Das Ergebnis Summe Sektoren lag trotz Belastungen in Höhe von 1,204 Mrd. EUR aus Wertminderungen im vierten Quartal des Geschäftsjahrs 2010 bei der zum Sektor Healthcare gehörenden Division Diagnostics um 4% über dem Vorjahreswert. Industry erhöhte seinen Gewinn gegenüber dem Vorjahr um 29%. Die erfolgreiche Umsetzung von Profitabilitätsinitiativen verbesserte die Kapazitätsauslastung und reduzierte die Kosten. Energy steigerte sein Ergebnis gegenüber dem Vorjahr um 7% aufgrund erfolgreicher Projektabwicklung. Das Ergebnis von Healthcare sank erheblich aufgrund der oben genannten Belastung aus Wertminderungen.

Im vierten Quartal des Geschäftsjahrs 2010 schlossen wir eine strategische Überprüfung ab, die zu einer Neubewertung der mittelfristigen Wachstumsaussichten und der langfristigen Marktentwicklung des Labordiagnostikgeschäfts führte, und gaben anschließend eine vorläufige Schätzung einer Belastung aus einer Wertminderung von Geschäfts- und Firmenwerten bekannt. Nach Abschluss der jährlichen Werthaltigkeitsprüfung buchte die Division Diagnostics zum Abschluss des vierten Quartals Wertminderungen in Höhe von 1,204 Mrd. EUR. Hierin enthalten ist eine Wertminderung von 1,145 Mrd. EUR auf Geschäfts- und Firmenwerte, die vorwiegend aufgrund von Währungsumrechnungseffekten geringer ausfiel als die zuvor bekannte gegebene Schätzung.

In den Zentralen Posten wurden im Geschäftsjahr 2010 Aufwendungen in Höhe von 310 Mio. EUR aufgrund einer Sondervergütung für alle Mitarbeiter, die nicht dem oberen Management angehören, erfasst. Nachdem die Aufteilung dieser Sondervergütung im ersten Quartal des Geschäftsjahrs 2011 ermittelt worden ist, werden die Aufwendungen im Geschäftsjahr 2011 überwiegend auf die Sektoren verteilt.

**Der Gewinn aus fortgeführten Aktivitäten stieg kräftig.** Das Ergebnis Summe Sektoren stieg im Geschäftsjahr 2010 trotz der Belastungen aus den oben genannten Wertminderungen in der Division Diagnostics des Sektors Healthcare. Die Belastungen unterhalb der Sektoren sanken im abgelaufenen Geschäftsjahr gegenüber dem Geschäftsjahr 2009. Diese Faktoren führten zusammen zu einer Steigerung des Gewinns aus fortgeführten Aktivitäten auf 4,112 Mrd. EUR. Das unverwässerte Ergebnis je Aktie der fortgeführten Aktivitäten stieg auf 4,54 EUR. Im vorigen Geschäftsjahr betrug das Ergebnis aus fortgeführten Aktivitäten 2,457 Mrd. EUR, und das unverwässerte Ergebnis je Aktie belief sich auf 2,60 EUR. Die Veränderung gegenüber dem Vorjahr ist im Wesentlichen auf Equity Investments zurückzuführen, die im Geschäftsjahr 2010 einen Verlust von 191 Mio. EUR verzeichneten, gegenüber einem Verlust von 1,851 Mrd. EUR im Geschäftsjahr 2009. Der Verlust im vorigen Geschäftsjahr beinhaltete Belastungen aus Wertminderungen in Verbindung mit NSN von 1,850 Mrd. EUR. Hierin wirkte vorwiegend eine Wertminderung auf unsere Beteiligung an NSN von 1,634 Mrd. EUR. Der geringere Verlust bei Equity Investments im Geschäftsjahr 2010 wurde durch einen Verlust bei Siemens IT Solutions and Services von 537 Mio. EUR (vor Steuern) teilweise aufgehoben. Im Geschäftsjahr 2009 verzeichnete Siemens IT Solutions and Services einen Gewinn von 90 Mio. EUR (vor Steuern). Der Verlust in der abgelaufenen Periode steht in Verbindung mit einer

Ergebnis Sektoren (in Mio. EUR)

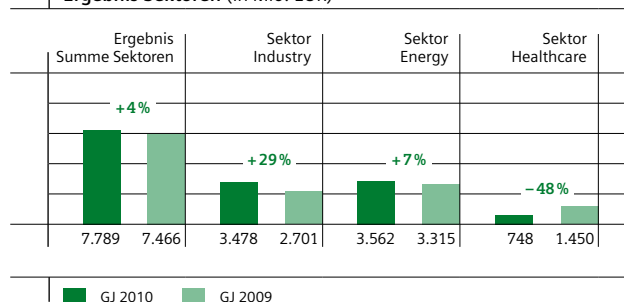

Ergebnis (in Mio. EUR)

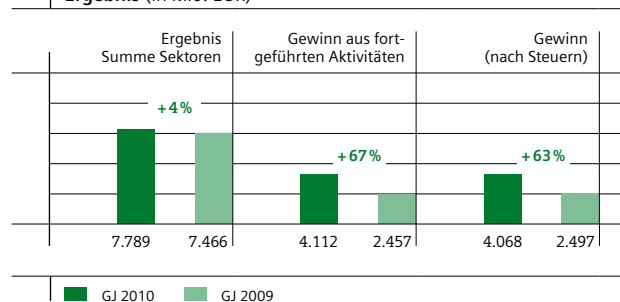

strategischen Neuausrichtung, die darauf abzielt, die Wettbewerbsfähigkeit dieses Geschäfts als eine selbstständig operierende Einheit zu stärken. Hierzu gehören die Neuausrichtung der Lösungs-, Outsourcing- und Softwareaktivitäten. Der Abschluss einer zuvor angekündigten Personalanpassungsmaßnahme führte im Geschäftsjahr 2010 zu Belastungen von 399 Mio. EUR (vor Steuern). Darüber hinaus buchten wir in den Zentralen Posten eine Belastung von 61 Mio. EUR (vor Steuern), die vorwiegend in Zusammenhang mit der Ausgliederung von Siemens IT Solutions and Services als rechtlich selbstständige, im Alleinbesitz von Siemens befindliche Einheit zum 1. Oktober 2010 steht. Der Gewinn nach Steuern stieg auf 4,068 Mrd. EUR, nach 2,497 Mrd. EUR im Vorjahr. Das unverwässerte Ergebnis je Aktie belief sich auf 4,49 EUR, gegenüber 2,65 EUR im Geschäftsjahr 2009.

**Wir erzielten einen hohen Mittelzufluss aus fortgeführten Aktivitäten.** Hohe Zahlungsmittelzuflüsse unserer Sektoren, insbesondere in der zweiten Hälfte des abgelaufenen Geschäftsjahrs, führten zu einer Steigerung des Free Cash Flow aus fortgeführten Aktivitäten auf 7,111 Mrd. EUR. Zusätzlich zu der starken operativen Leistung der Sektoren beinhaltete die Verbesserung des Free Cash Flow gegenüber dem Vorjahr günstige Veränderungen im Nettoumlaufvermögen, einschließlich erheblich höherer erhaltener Anzahlungen auf noch nicht abgeschlossene Auftragsfertigungsprojekte insbesondere im Sektor Energy, im Vergleich zu einer Reduzierung dieser Zahlungen im Geschäftsjahr 2009. Dagegen erfasste der Konzern im Geschäftsjahr 2010 höhere Zahlungen in Zusammenhang mit Ertragsteuern und Pensionsplänen. Im Geschäftsjahr 2009 beinhalteten negative Veränderungen im Nettoumlaufvermögen Zahlungen von 1,008 Mrd. EUR, die nach dem Abschluss von Einigungsverfahren mit Behörden in den USA und Deutschland geleistet wurden, sowie hohe Zah-

lungsmittelabflüsse aus Projektbelastungen bei Fossil Power Generation, Mobility und Siemens IT Solutions and Services. Die oben genannten Belastungen aus Wertminderungen bei Diagnostics und NSN führten in den beiden Berichtsperioden nicht zu Zahlungsmittelabflüssen. Der Free Cash Flow enthielt in beiden Perioden jeweils Zahlungsmittelabflüsse von ungefähr 0,8 Mrd. EUR für Personalanpassungsmaßnahmen.

**Wir steigerten unsere Kapitaleffizienz.** Die Kapitalrendite (ROCE) verbesserte sich auf fortgeführter Basis auf 10,4% gegenüber 6,1% im Vorjahr. Die Veränderung ist vorwiegend auf das höhere Ergebnis aus fortgeführten Aktivitäten und zu einem geringeren Teil auf ein gegenüber dem Vorjahr niedrigeres durchschnittlich eingesetztes Kapital zurückzuführen. In beiden Jahren wurde die Kapitalrendite durch die oben genannten Belastungen des Ergebnisses aus fortgeführten Aktivitäten beeinträchtigt. Im abgelaufenen Geschäftsjahr entsprachen die Wertminderungen von 1,204 Mrd. EUR (vor Steuern) bei Diagnostics und die Aufwendungen von 460 Mio. EUR (vor Steuern) in Verbindung mit Siemens IT Solutions and Services einer Belastung der Kapitalrendite von zusammen 3,6 Prozentpunkten. Im Vorjahr bedeuteten die Wertminderungen in Verbindung mit NSN von 1,850 Mrd. EUR (vor Steuern) eine Belastung von 4,6 Prozentpunkten.

**Wir schlagen vor, die Dividende zu erhöhen.** Der Vorstand und der Aufsichtsrat der Siemens AG schlagen eine Dividende von 2,70 EUR je Aktie vor. Die Dividende des Vorjahrs belief sich auf 1,60 EUR je Aktie.

Free Cash Flow (in Mio. EUR)

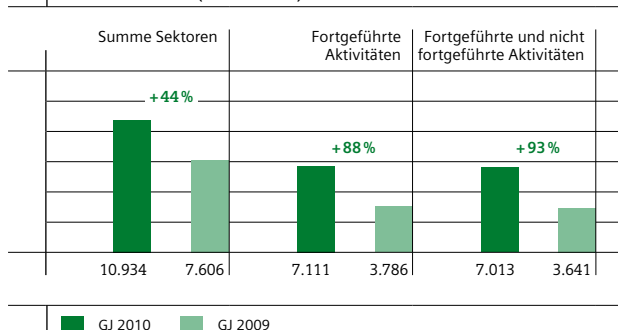

Dividende je Aktie (in EUR)

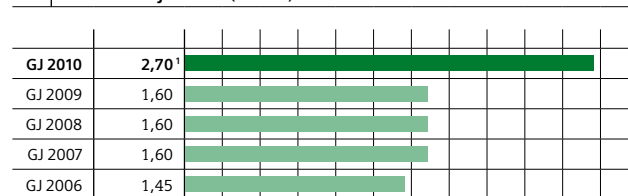

<sup>1</sup> Vorschlag des Vorstands mit Zustimmung des Aufsichtsrats; von den Aktionären auf der Hauptversammlung am 25. Januar 2011 zu bestätigen.

## Ertragslage

### ECKDATEN SIEMENS UND KONZERN-GEWINN- UND VERLUSTRECHNUNG

Die folgende Darstellung gibt einen Überblick über ausgewählte Eckdaten von Siemens für das zum 30. September 2010 endende Geschäftsjahr:

#### Auftragslage und Umsatz

Im Geschäftsjahr 2010 belief sich der Umsatz auf 75,978 Mrd. EUR und lag damit um 1% unter dem Vorjahreswert. Der Auftragseingang stieg im Vorjahresvergleich um 3% auf 81,163 Mrd. EUR. Hieraus ergab sich ein Book-to-Bill-Verhältnis von 1,07. Auf organischer Basis, das heißt bereinigt um Währungsumrechnungs- und Portfolioeffekte, war der Umsatz um 3% rückläufig, während der Auftragseingang um 1% über dem Vorjahreswert lag. Die Entwicklung von Auftragseingang und Umsatz im Jahresverlauf zeigte sich stark von der Erholung der Weltwirtschaft beeinflusst: Während der Auftragseingang in den ersten sechs Monaten im Vorjahresvergleich um 15% fiel, berichteten wir in der zweiten Hälfte des Geschäftsjahrs 2010 ein Auftragswachstum von 23% gegenüber der entsprechenden Vorjahresperiode. Die Umsatzentwicklung war ähnlich, wenn auch mit geringeren Fluktuationen dank des stabilisierenden Effekts unseres hohen Auftragsbestands. Insgesamt stieg der Auftragsbestand unserer Sektoren zum 30. September 2010 auf 87 Mrd. EUR, im Vergleich zu 81 Mrd. EUR im Vorjahr, einschließlich der Wirkung aus positiven Währungsumrechnungseffekten. Wir erwarten, dass vom aktuellen Auftragsbestand 39 Mrd. EUR im Geschäftsjahr 2011 in Umsatz umgesetzt werden können, 19 Mrd. EUR im Geschäftsjahr 2012 und der Rest in nachfolgenden Berichtsperioden.

**Die Aufträge externer Kunden** stiegen im Geschäftsjahr 2010 um 3% als Folge einer erhöhten Nachfrage bei Industry und Healthcare sowie positiver Währungsumrechnungseffekte in allen Sektoren. Im Sektor Industry – unserem am Umsatz gemessen größten Sektor – legte der Auftragseingang um 5% zu und wurde durch Wachstum in fünf der sechs Divisionen gestützt, angeführt von zweistelligen Zuwachsraten bei Industry Automation und OSRAM. Bei Mobility lagen die Aufträge unter dem Vorjahresniveau, was in erster Linie auf ein geringeres Volumen aus Großaufträgen zurückzuführen war. Im Sektor Energy blieb der Auftragseingang im Vergleich zum Vorjahr stabil, da geringere Aufträge bei Fossil Power Generation von Wachstum in den anderen Divisionen des Sektors kompensiert wurden, angeführt von höherer Nachfrage bei Renewable Energy. Der Auftragsrückgang bei Fossil Power Generation war in erster Linie durch ein geringeres Volumen aus Großaufträgen in den ersten drei Quartalen des Geschäftsjahrs 2010 bedingt. Im vierten Quartal drehte sich dieser Trend. Das Auftragswachstum im Sektor Healthcare stützte sich auf einen starken Auftragseingang bei Imaging & IT.

Aus geografischer Sicht legte der Auftragseingang in Amerika prozentual zweistellig zu und wuchs auch in Asien, Australien. Dadurch wurde ein Auftragsrückgang in Europa, GUS, Afrika, Naher und Mittlerer Osten mehr als ausgeglichen. Die Auftragsentwicklung in den Schwellenländern, die in Übereinstimmung mit dem Internationalen Währungsfonds definiert sind, entsprach dem allgemeinen Auftragsrend in jeder unserer drei Berichtsregionen. In **Europa, GUS, Afrika, Naher und Mittlerer Osten** – unserer am Umsatz gemessen größten Berichtsregion – fiel der Auftragseingang um 5%, im Wesentlichen aufgrund eines Auftragsrückgangs um 11% im Sektor

#### Auftragseingang (Sitz des Kunden)

| (in Mio. EUR)                                                | Geschäftsjahresende<br>30. September |               | Veränderung in %<br>gegenüber Vorjahr |                          | darin     |             |
|--------------------------------------------------------------|--------------------------------------|---------------|---------------------------------------|--------------------------|-----------|-------------|
|                                                              | 2010                                 | 2009          | Ist                                   | Vglb. Basis <sup>1</sup> | Währung   | Portfolio   |
| Europa, GUS <sup>2</sup> , Afrika, Naher und Mittlerer Osten | 43.478                               | 45.696        | - 5%                                  | - 5%                     | 1%        | - 1%        |
| <i>darin Deutschland</i>                                     | 11.985                               | 12.307        | - 3%                                  | - 2%                     | 0%        | 0%          |
| Amerika                                                      | 23.454                               | 19.935        | 18%                                   | 15%                      | 3%        | 0%          |
| <i>darin USA</i>                                             | 16.640                               | 14.691        | 13%                                   | 12%                      | 2%        | 0%          |
| Asien, Australien                                            | 14.231                               | 13.360        | 7%                                    | 2%                       | 5%        | 0%          |
| <i>darin China</i>                                           | 5.599                                | 5.525         | 1%                                    | 0%                       | 2%        | 0%          |
| <i>darin Indien</i>                                          | 2.368                                | 2.309         | 3%                                    | - 2%                     | 4%        | 0%          |
| <b>Siemens</b>                                               | <b>81.163</b>                        | <b>78.991</b> | <b>3%</b>                             | <b>1%</b>                | <b>2%</b> | <b>- 1%</b> |

<sup>1</sup> Bereinigt um Währungsumrechnungs- und Portfolioeffekte. <sup>2</sup> Gemeinschaft Unabhängiger Staaten.

Energy gegenüber dem Vorjahr. Dies war in erster Linie auf ein geringeres Volumen aus Großaufträgen bei Fossil Power Generation zurückzuführen. Der Auftragseingang im Sektor Healthcare blieb in der Region stabil. Bei Industry lagen die Aufträge um 2% über dem Vorjahr, da Wachstum bei Drive Technologies, Industry Automation und OSRAM die schwächere Nachfrage in den anderen Divisionen, einschließlich eines geringeren Volumens aus Großaufträgen bei Mobility, mehr als kompensierte. Im Vorjahr gewonnene Großaufträge bei Mobility waren der Hauptgrund für den um 3% geringeren Auftragseingang für Siemens in Deutschland. In der Region **Amerika** legte der Auftragseingang um 18% zu, mit zweistelligen Zuwachsraten in allen Sektoren. Der Sektor Energy verzeichnete mit 28% den stärksten Anstieg, gestützt von einigen Großaufträgen für Onshore-Windparks bei Renewable Energy. Bei Industry erhöhte sich der Auftragseingang in der Region um 15%, wobei alle Divisionen zu diesem Wachstum beitrugen. Healthcare berichtete in Amerika ein Auftragswachstum von 12%, das in erster Linie auf eine hohe Nachfrage bei Imaging & IT zurückzuführen war. Innerhalb der Region enthielt das Auftragswachstum in den USA ein höheres Volumen aus Großaufträgen in allen drei Sektoren. In **Asien, Australien** profitierte die Auftragsentwicklung von positiven Währungsumrechnungseffekten und lag um 7% über dem Vorjahreswert, trotz eines deutlich geringeren Volumens aus Großaufträgen. Im Sektor Healthcare stieg der Auftragseingang in der Region prozentual zweistellig und mit geringeren Zuwachsraten bei Energy und Industry. Das oben erwähnte geringere Volumen aus Großaufträgen in der Region beeinträchtigte die Auftragsentwicklung in China und Indien. Zum Vergleich enthielt das vorherige Geschäftsjahr einen Großauftrag für Hochgeschwindigkeitszüge in China sowie Großaufträge bei Industry Solutions in Indien.

Wie bereits berichtet, haben wir beschlossen, vorbehaltlich der unten genannten Ausnahmen, keine Neuaufträge mehr mit Kunden im Iran abzuschließen. Dementsprechend haben wir konzernweite Richtlinien erlassen, die Details unseres allgemeinen Beschlusses festlegen. Gemäß diesen Richtlinien wird Siemens keine weiteren Angebote für Direktlieferungen an Kunden im Iran mehr abgeben. Darüber hinaus sind indirekte Lieferungen von Siemens in den Iran über nicht verbundene Unternehmen, einschließlich Unternehmen, an denen Siemens Minderheitsbeteiligungen hält, generell verboten, es sei denn, unter bestimmten Bedingungen wurde eine Ausnahme ausdrücklich genehmigt. Gleichwohl sind die Lief-

erung von Produkten und die Erbringung von Dienstleistungen für humanitäre Zwecke, einschließlich Produkte und Dienstleistungen unseres Sektors Healthcare, sowie die Lieferung von Produkten und die Erbringung von Dienstleistungen zur Instandhaltung bestehender Anlagen (zum Beispiel Ersatzteillieferungen sowie Wartungs- und Montageeinsätze) im Rahmen dieser Richtlinien weiterhin zulässig. Schließlich kann bereits zuvor eingegangenen Verpflichtungen gegenüber Kunden im Iran Rechnung getragen werden. Dies betrifft insbesondere rechtsverbindliche Verpflichtungen aus bereits existierenden Vereinbarungen oder Angeboten, die abgegeben wurden, bevor die oben genannten Richtlinien bekannt gegeben und verabschiedet wurden. Wenngleich wir erwarten, dass unsere Geschäftsaktivitäten im Iran als Folge der Anwendung der neuen Richtlinien und der damit verbundenen Verringerung der Zahl neuer Verträge zurückgehen werden, wird die tatsächliche Entwicklung unserer Umsätze in der Zukunft stark vom Zeitpunkt und Umfang der Forderungen von Kunden, bereits existierende Verpflichtungen zu erfüllen, abhängen. Für weiterführende Informationen siehe »– Bericht über die voraussichtliche Entwicklung mit ihren wesentlichen Chancen und Risiken – Risiken«.

**Der Umsatz mit externen Kunden** fiel im Geschäftsjahr 2010 um 1%, einschließlich eines prozentual zweistelligen Rückgangs bei Siemens IT Solutions and Services. In allen drei Sektoren profitierte der Umsatz von positiven Währungsumrechnungseffekten. Bei Industry lag der Umsatz leicht unter dem Vorjahreswert, mit Umsatzrückgängen bei Industry Solutions und Drive Technologies. OSRAM verzeichnete hingegen ein prozentual zweistelliges Umsatzwachstum gegenüber dem Vorjahr. Der Umsatz bei Energy fiel um 1%, wobei ein prozentual zweistelliges Umsatzwachstum bei Renewable Energy Rückgänge in anderen Divisionen fast vollständig kompensierte. Bei Healthcare lag der Umsatz um 4% über dem Vorjahreswert, mit Wachstum in allen Divisionen und im Lauf des Geschäftsjahrs stetig steigendem Umsatz. Unterhalb der Sektoren waren geringere Umsätze bei Siemens IT Solutions and Services und Portfoliobereinigungen bei den Zentral gesteuerten Portfolioaktivitäten wesentliche Treiber für den Rückgang im Gesamtumsatz von Siemens.

In den **Schwellenländern** legte der Umsatz um 7% auf 23,142 Mrd. EUR zu. Damit waren die Schwellenländer im Geschäftsjahr 2010 für 30% des Gesamtumsatzes von Siemens verantwortlich, gegenüber 28% im Geschäftsjahr 2009.

## Umsatz (Sitz des Kunden)

| (in Mio. EUR)                                                | Geschäftsjahresende<br>30. September |               | Veränderung in %<br>gegenüber Vorjahr |                          | darin     |           |
|--------------------------------------------------------------|--------------------------------------|---------------|---------------------------------------|--------------------------|-----------|-----------|
|                                                              | 2010                                 | 2009          | Ist                                   | Vglb. Basis <sup>1</sup> | Währung   | Portfolio |
| Europa, GUS <sup>2</sup> , Afrika, Naher und Mittlerer Osten | 41.426                               | 43.288        | - 4%                                  | - 5%                     | 1%        | - 1%      |
| <i>darin Deutschland</i>                                     | 11.432                               | 11.525        | - 1%                                  | - 1%                     | 0%        | 0%        |
| Amerika                                                      | 20.643                               | 20.754        | - 1%                                  | - 3%                     | 3%        | 0%        |
| <i>darin USA</i>                                             | 14.772                               | 15.684        | - 6%                                  | - 6%                     | 1%        | 0%        |
| Asien, Australien                                            | 13.909                               | 12.609        | 10%                                   | 5%                       | 5%        | 0%        |
| <i>darin China</i>                                           | 5.841                                | 5.218         | 12%                                   | 10%                      | 2%        | 0%        |
| <i>darin Indien</i>                                          | 1.961                                | 1.680         | 17%                                   | 9%                       | 7%        | 0%        |
| <b>Siemens</b>                                               | <b>75.978</b>                        | <b>76.651</b> | <b>- 1%</b>                           | <b>- 3%</b>              | <b>2%</b> | <b>0%</b> |

<sup>1</sup> Bereinigt um Währungsumrechnungs- und Portfolioeffekte. <sup>2</sup> Gemeinschaft Unabhängiger Staaten.

Aus geografischer Sicht wurde das Wachstum in Asien, Australien durch Rückgänge in anderen Regionen mehr als ausgeglichen. In **Europa, GUS, Afrika, Naher und Mittlerer Osten** war der Umsatz im Vorjahresvergleich um 4% rückläufig, in erster Linie aufgrund geringerer Umsätze im Sektor Industry und bei Siemens IT Solutions and Services. Bei Industry fiel der Umsatz in der Region um 6%, da ein starkes Wachstum bei OSRAM von prozentual zweistelligen Rückgängen bei Drive Technologies und Industry Solutions mehr als ausgeglichen wurde. Bei Energy und Healthcare lag der Umsatz ungefähr auf Vorjahresniveau. In Deutschland wurde ein prozentual zweistelliger Umsatzzuwachs bei Energy durch einen Umsatzrückgang bei Siemens IT Solutions and Services nahezu aufgehoben. In der Region **Amerika** fiel der Umsatz im Vorjahresvergleich um 1%. Dabei wurde ein Umsatzrückgang in den

USA durch prozentual zweistelliges Wachstum in den Schwellenländern der Region nahezu kompensiert. Bei den Sektoren verzeichnete Industry einen leichten Rückgang in Amerika, und der Umsatz lag bei Energy und Healthcare auf Vorjahresniveau. Unterstützt von positiven Währungsumrechnungseffekten, stieg der Umsatz in **Asien, Australien** im Geschäftsjahr 2010 um 10%, einschließlich zweistelliger Zuwachsraten bei Industry und Healthcare. Fünf der sechs Divisionen des Sektors Industry konnten dabei ihren Umsatz steigern, und alle Divisionen des Sektors Healthcare berichteten ein prozentual zweistelliges Umsatzwachstum gegenüber dem Vorjahr. Der Sektor Energy verzeichnete in der Region einen Umsatzrückgang. Das Umsatzwachstum in Indien stützte sich auf zweistellige Zuwachsraten in allen Sektoren.

## Auftragseingang und Umsatz nach Quartalen (in Mio. EUR)

| Auftragseingang |        | Umsatz |        | Book-to-Bill-Verhältnis |  |
|-----------------|--------|--------|--------|-------------------------|--|
| Q4 10           | 23.473 | Q4 10  | 21.229 | 1,11                    |  |
| Q3 10           | 20.871 | Q3 10  | 19.170 | 1,09                    |  |
| Q2 10           | 17.844 | Q2 10  | 18.227 | 0,98                    |  |
| Q1 10           | 18.976 | Q1 10  | 17.352 | 1,09                    |  |
| Q4 09           | 18.747 | Q4 09  | 19.714 | 0,95                    |  |
| Q3 09           | 17.160 | Q3 09  | 18.348 | 0,94                    |  |
| Q2 09           | 20.864 | Q2 09  | 18.955 | 1,10                    |  |
| Q1 09           | 22.220 | Q1 09  | 19.634 | 1,13                    |  |



## Konzern-Gewinn- und Verlustrechnung

| (in Mio. EUR)                | Geschäftsjahresende<br>30. September |        | Veränderung<br>in % |
|------------------------------|--------------------------------------|--------|---------------------|
|                              | 2010                                 | 2009   |                     |
| Bruttoergebnis vom Umsatz    | 21.647                               | 20.710 | 5 %                 |
| <i>in Prozent vom Umsatz</i> | 28,5 %                               | 27,0 % |                     |

Das **Bruttoergebnis vom Umsatz** lag im Geschäftsjahr 2010 um 5 % über dem Vorjahreswert, mit höheren Bruttoergebnismargen in allen Sektoren. Obwohl der Umsatz bei Industry und Energy leicht unter dem Vorjahresniveau lag, berichteten beide Sektoren höhere Bruttoergebnisse. Der Anstieg bei Industry beruhte unter anderem auf einer höheren Kapazitätsauslastung bei OSRAM und, in geringerem Maße, bei Industry Automation sowie einem höheren Bruttoergebnis bei Mobility. Diese Faktoren haben einen deutlichen Rückgang des Bruttoergebnisses bei Industry Solutions mehr als kompensiert. Diese Division buchte Aufwendungen in Höhe von 205 Mio. EUR in Zusammenhang mit einer aktuellen Anpassung der erwarteten Kosten bei einem Projekt mit einem lokalen Partner in den USA und verzeichnete außerdem einen deutlichen Umsatzrückgang im Vorjahresvergleich. Im Sektor Energy stieg das Bruttoergebnis aufgrund eines günstigeren Umsatzmix und operativer Stärke im Projektgeschäft, insbesondere bei Fossil Power Generation. Im Sektor Healthcare stützte sich der Anstieg des Bruttoergebnisses zum Teil auf gestiegene Umsätze und enthielt höhere Bruttoergebnisse und Bruttomargen in allen Divisionen. Zusätzlich zu einem günstigen Produktmix bei Imaging & IT profitierte Healthcare von positiven Effekten in Zusammenhang mit der Währungsentwicklung sowie vom Vergleich mit dem vorherigen Geschäftsjahr, in dem das Bruttoergebnis ein ungünstiges Währungsgeschäft beinhaltete und von höheren Aufwendungen in Zusammenhang mit Partikeltherapieverträgen bei Workflow & Solutions belastet wurde. Diese Aufwendungen beliefen sich im aktuellen Geschäftsjahr auf 96 Mio. EUR, gegenüber 169 Mio. EUR im Vorjahr. Das Bruttoergebnis profitierte in allen drei Sektoren von bereits berichteten Pensionserträgen im zweiten Quartal des Geschäftsjahrs 2010. Außerdem wurde das Bruttoergebnis durch Aufwendungen für Personalanpassungsmaßnahmen in Zusammenhang mit der strategischen Neuausrichtung von Siemens IT Solutions and Services, die zum Großteil als Umsatzkosten erfasst wurden, negativ beeinflusst. Zusätzlich enthielt das Bruttoergebnis im Geschäftsjahr 2010 201 Mio. EUR der Aufwendungen in Zusammenhang

mit der Sondervergütung an Mitarbeiter, die nicht dem oberen Management angehören. Zusammen mit erzielten Einsparungen in Verbindung mit unseren Maßnahmen zum Supply Chain Management führten diese Faktoren für Siemens zu einem Bruttoergebnis in Prozent vom Umsatz von 28,5 %, das damit über dem Vorjahreswert von 27,0 % lag.

| (in Mio. EUR)                                                   | Geschäftsjahresende<br>30. September |          | Veränderung<br>in % |
|-----------------------------------------------------------------|--------------------------------------|----------|---------------------|
|                                                                 | 2010                                 | 2009     |                     |
| Forschungs- und Entwicklungskosten                              | - 3.846                              | - 3.900  | - 1 %               |
| <i>in Prozent vom Umsatz</i>                                    | 5,1 %                                | 5,1 %    | -                   |
| Vertriebs- und allgemeine Verwaltungskosten                     | - 11.130                             | - 10.896 | 2 %                 |
| <i>in Prozent vom Umsatz</i>                                    | 14,6 %                               | 14,2 %   | -                   |
| Sonstige betriebliche Erträge                                   | 856                                  | 1.065    | - 20 %              |
| Sonstige betriebliche Aufwendungen                              | - 1.611                              | - 632    | 155 %               |
| Ergebnis aus nach der Equity-Methode bilanzierten Beteiligungen | - 40                                 | - 1.946  | - 98 %              |
| Zinsertrag                                                      | 2.161                                | 2.136    | 1 %                 |
| Zinsaufwand                                                     | - 1.890                              | - 2.213  | - 15 %              |
| Sonstiges Finanzergebnis                                        | - 336                                | - 433    | - 22 %              |

Die **Forschungs- und Entwicklungskosten (FuE-Kosten)** waren leicht rückläufig und beliefen sich auf 3,846 Mrd. EUR – eine Entwicklung, die in erster Linie auf geringere Aufwendungen im Sektor Industry zurückzuführen war. In Prozent vom Umsatz verblieben die FuE-Kosten mit 5,1 % auf dem Vorjahresniveau. Die **Vertriebs- und allgemeinen Verwaltungskosten (SG&A-Kosten)** erhöhten sich im Geschäftsjahr 2010 leicht auf 11,130 Mrd. EUR beziehungsweise 14,6 % vom Umsatz, gegenüber 10,896 Mrd. EUR beziehungsweise 14,2 % vom Umsatz im Vorjahr. Der Anstieg resultierte vor allem aus höheren Aufwendungen im Sektor Energy in Zusammenhang mit Wachstum in der zweiten Hälfte des Geschäftsjahrs 2010 sowie aus den oben erwähnten Aufwendungen bei Siemens IT Solutions and Services, die zum Teil als Vertriebs- und allgemeine Verwaltungskosten erfasst wurden. Die Vertriebs- und allgemeinen Verwaltungskosten enthielten im Geschäftsjahr 2010 auch einen Teil der Aufwendungen in Zusammenhang mit der Sondervergütung an Mitarbeiter, die nicht dem oberen Management angehören.

Die **Sonstigen betrieblichen Erträge** beliefen sich im Geschäftsjahr 2010 auf 856 Mio. EUR. Die aktuelle Berichtsperiode enthielt höhere Erträge in Verbindung mit Compliance-bezogenen Themen, einschließlich eines Ertrags von 84 Mio. EUR aus der Einigung mit den D&O-Versicherern, eines Nettoertrags in Zusammenhang mit der Einigung mit ehemaligen Vorstands- und Aufsichtsratsmitgliedern von Siemens sowie Erträgen in Höhe von 40 Mio. EUR aus der Rückführung durch Behörden arrestierter Beträge. Darüber hinaus enthielt das aktuelle Geschäftsjahr einen Ertrag in Höhe von 47 Mio. EUR aus der Veräußerung des Flugfeldbefeuerungsgeschäfts bei der Division Mobility sowie einen Ertrag in Höhe von 35 Mio. EUR aus der Veräußerung unserer Roke-Manor-Aktivitäten in Großbritannien, die unter den Zentralen Posten berichtet wurde. Zudem hat Siemens im dritten Quartal des Geschäftsjahrs 2010 die Konsolidierung einer Tochtergesellschaft infolge des Verlusts des beherrschenden Einflusses beendet und in diesem Zusammenhang einen Ertrag in Höhe von 40 Mio. EUR ausgewiesen. Zum Vergleich: Im Geschäftsjahr 2009 enthielten die Sonstigen betrieblichen Erträge in Höhe von 1,065 Mrd. EUR einen Ertrag von 327 Mio. EUR aus der Veräußerung unseres Anteils an Fujitsu Siemens Computers (Holding) B.V. (FSC), höhere Erträge in Zusammenhang mit Immobilienverkäufen, vor allem einen Ertrag in Höhe von 224 Mio. EUR aus dem Verkauf des Wohnungsbestands von Siemens, sowie Erträge in Verbindung mit rechtlichen und regulatorischen Sachverhalten.

Die **Sonstigen betrieblichen Aufwendungen** stiegen im Geschäftsjahr 2010 deutlich auf 1,611 Mrd. EUR, gegenüber 632 Mio. EUR im Vorjahr. Der Unterschied resultierte in erster Linie aus Aufwendungen für Wertminderungen in der Division Diagnostics im vierten Quartal des Geschäftsjahrs 2010, einschließlich einer Wertminderung von 1,145 Mrd. EUR auf Geschäfts- und Firmenwerte und Wertminderungen auf Immobilien in Höhe von 39 Mio. EUR. Darüber hinaus enthielt die aktuelle Berichtsperiode einen Betrag in Höhe von 106 Mio. EUR, der in Zusammenhang mit einem erwarteten Verlust aus dem angekündigten Verkauf unseres Electronics-Assembly-Systems-Geschäfts an ASM Pacific Technology zurückgestellt wurde. Dieses Geschäft wird in den Zentral gesteuerten Portfolioaktivitäten gehalten. Zudem enthielt das Geschäftsjahr 2010 Aufwendungen in Verbindung mit rechtlichen und regulatorischen Sachverhalten. Zum Vergleich: Das Vorjahr enthielt Aufwendungen in Höhe von 95 Mio. EUR für externe Berater, die Siemens in Zusammenhang mit den Untersuchungen von mutmaßlichen Verstößen gegen Antikorruptionsgesetze und von ähnlichen Angelegenheiten sowie mit

Maßnahmen zur Beseitigung von Schwächen des internen Kontrollsystems beauftragt hatte. Auch enthielt das Geschäftsjahr 2009 Aufwendungen in Höhe von 53 Mio. EUR in Zusammenhang mit einer globalen Vergleichsvereinbarung mit der Weltbankgruppe sowie Aufwendungen in Verbindung mit der Veräußerung einer Industriefertigungseinheit in Österreich, die unter den Zentral gesteuerten Portfolioaktivitäten geführt wurde. Darüber hinaus enthielt die Vorjahresperiode Wertberichtigungen auf Darlehen.

Das **Ergebnis aus nach der Equity-Methode bilanzierten Beteiligungen** betrug minus 40 Mio. EUR, im Vergleich zu minus 1,946 Mrd. EUR im Geschäftsjahr 2009. Die Veränderung resultierte im Wesentlichen aus einem Beteiligungsverlust in Höhe von 2,177 Mrd. EUR in Verbindung mit NSN im Geschäftsjahr 2009. Dieser Beteiligungsverlust enthielt eine im vierten Quartal gebuchte Wertminderung in Höhe von 1,634 Mrd. EUR auf unsere Beteiligung an NSN sowie einen Verlust in Höhe von 543 Mio. EUR, einschließlich einer Wertberichtigung von 216 Mio. EUR auf aktive latente Steuern bei NSN, sowie unseren Anteil an Restrukturierungs- und Integrationskosten. Das Geschäftsjahr 2009 enthielt außerdem einen Beteiligungsverlust in Höhe von 171 Mio. EUR in Verbindung mit Enterprise Networks Holdings B.V. (EN). Zum Vergleich: Im Geschäftsjahr 2010 enthielt das Ergebnis aus nach der Equity-Methode bilanzierten Beteiligungen einen Beteiligungsverlust in Verbindung mit NSN in Höhe von 533 Mio. EUR. Der Beteiligungsgewinn in Verbindung mit unseren Anteilen an BSH und KMW verbesserte sich im Geschäftsjahr 2010 auf insgesamt 277 Mio. EUR, gegenüber insgesamt 195 Mio. EUR im Vorjahr.

Der **Zinsertrag** stieg im Geschäftsjahr 2010 leicht auf 2,161 Mrd. EUR, im Vergleich zu 2,136 Mrd. EUR im Vorjahr. Der **Zinsaufwand** belief sich auf 1,890 Mrd. EUR und lag damit unter dem Vorjahreswert von 2,213 Mrd. EUR. Der Rückgang des Zinsaufwands war zum Teil auf im Vorjahresvergleich gesunkene Zinssätze zurückzuführen.

Das **Sonstige Finanzergebnis** betrug im Geschäftsjahr 2010 minus 336 Mio. EUR, gegenüber minus 433 Mio. EUR im Vorjahr. Die Veränderung resultierte in erster Linie aus höheren Aufwendungen im Geschäftsjahr 2009 für Wertberichtigungen und Abschreibungen auf Finanzforderungen, nach Abzug von Zuschreibungen. Diese Nettoaufwendungen beliefen sich im Geschäftsjahr 2010 auf 63 Mio. EUR, gegenüber 162 Mio. EUR im Vorjahr. Zudem enthielt das Geschäftsjahr 2010 höhere Erträge aus zur Veräußerung verfügbaren finanziellen Vermögenswerten, einschließlich eines Ertrags in Höhe von

47 Mio. EUR aus dem Verkauf eines Anteils an einer Beteiligung bei SFS. Diese Faktoren wurden zum Teil durch im Vorjahresvergleich höhere Verluste in Zusammenhang mit Zinsderivaten aufgehoben, die nicht die Voraussetzungen für die Bilanzierung einer Sicherungsbeziehung (*Hedge Accounting*) erfüllen.

| (in Mio. EUR)                                                                | Geschäftsjahresende<br>30. September |         | Veränderung<br>in % |
|------------------------------------------------------------------------------|--------------------------------------|---------|---------------------|
|                                                                              | 2010                                 | 2009    |                     |
| Gewinn aus fortgeführten Aktivitäten vor Ertragsteuern                       | 5.811                                | 3.891   | 49 %                |
| Ertragsteuern                                                                | - 1.699                              | - 1.434 | 18 %                |
| <i>in Prozent vom Gewinn aus fortgeführten Aktivitäten vor Ertragsteuern</i> | 29 %                                 | 37 %    | -                   |
| Gewinn aus fortgeführten Aktivitäten                                         | 4.112                                | 2.457   | 67 %                |
| Gewinn/Verlust aus nicht fortgeführten Aktivitäten nach Ertragsteuern        | - 44                                 | 40      | -                   |
| Gewinn (nach Steuern)                                                        | 4.068                                | 2.497   | 63 %                |
| Auf nicht beherrschende Anteile entfallender Gewinn (nach Steuern)           | 169                                  | 205     | -                   |
| Auf Aktionäre der Siemens AG entfallender Gewinn (nach Steuern)              | 3.899                                | 2.292   | 70 %                |

Der **Gewinn aus fortgeführten Aktivitäten vor Ertragsteuern** lag im aktuellen Geschäftsjahr bei 5,811 Mrd. EUR, im Vergleich zu 3,891 Mrd. EUR im Vorjahr. Die Verbesserung im Vergleich zum Vorjahr resultierte aus den oben genannten Faktoren, insbesondere dem höheren Bruttoergebnis in allen Sektoren und dem verbesserten Finanzergebnis im Geschäftsjahr

2010, zum Teil kompensiert von Aufwendungen in Zusammenhang mit der strategischen Neuausrichtung von Siemens IT Solutions and Services. Während beide Geschäftsjahre, wie oben erwähnt, erhebliche Wertminderungen enthielten, war deren Effekt auf die fortgeführten Aktivitäten im Geschäftsjahr 2010 geringer. Die effektive Steuerquote betrug 29 % im Geschäftsjahr 2010 und lag damit unter dem Vorjahreswert von 37 %. Im aktuellen Geschäftsjahr wurde die Steuerquote von den Wertminderungen auf Geschäfts- und Firmenwerte in der Division Diagnostics beeinträchtigt, da diese zum Großteil steuerlich nicht geltend gemacht werden können. Dieser Effekt wurde durch die Auflösung von Steuerrückstellungen nach der Beendigung von Betriebsprüfungen und der Auflösung von Steuerverbindlichkeiten nach einer positiven Entscheidung in Bezug auf einen Einspruch in Zusammenhang mit nicht abzugsfähigen Betriebsaufwendungen auf bestimmte ausländische Dividenden mehr als ausgeglichen. Zum Vergleich: Die Steuerquote im Vorjahr wurde durch den erheblichen Verlust aus nach der Equity-Methode bilanzierten Beteiligungen beeinflusst, in erster Linie in Verbindung mit NSN, teilweise kompensiert durch einen steuerfreien Ertrag aus der Veräußerung unseres Anteils an FSC. Damit betrug der Gewinn aus fortgeführten Aktivitäten nach Ertragsteuern 4,112 Mrd. EUR im Geschäftsjahr 2010 und lag damit über dem Vorjahreswert von 2,457 Mrd. EUR.

Die **nicht fortgeführten Aktivitäten** enthalten vornehmlich die ehemaligen Com-Aktivitäten. Diese umfassen das Geschäft mit Telekommunikationsinfrastruktur (Carrier-Geschäft), das im dritten Quartal des Geschäftsjahrs 2007 in NSN eingebracht wurde, das Geschäft mit Lösungen für die Unternehmenskommunikation, von dem 51 % im vierten Quartal des Geschäftsjahrs 2008 veräußert wurden, sowie das im Geschäftsjahr 2005 an die BenQ Corporation verkaufte Mobilfunkgeschäft. Im Geschäftsjahr 2010 betrug der Verlust aus

#### Überleitung der Konzern-Gewinn- und Verlustrechnung (in Mrd. EUR)

|                           | GJ 2010     |             | GJ 2009     |             | GJ 2008     |             |
|---------------------------|-------------|-------------|-------------|-------------|-------------|-------------|
| <b>Umsatz</b>             | <b>76,0</b> |             | <b>76,7</b> |             | <b>77,3</b> |             |
| Umsatzkosten              | - 54,3      | 72 %        | - 55,9      | 73 %        | - 56,3      | 73 %        |
| <b>Bruttoergebnis</b>     | <b>21,6</b> | <b>28 %</b> | <b>20,7</b> | <b>27 %</b> | <b>21,0</b> | <b>27 %</b> |
| FuE-Kosten                | - 3,8       | 5 %         | - 3,9       | 5 %         | - 3,8       | 5 %         |
| SG&A-Kosten               | - 11,1      | 15 %        | - 10,9      | 14 %        | - 13,6      | 18 %        |
| Sonstiges / Steuern       | - 2,6       |             | - 3,5       |             | - 1,8       |             |
| <b>Gewinn<sup>1</sup></b> | <b>4,1</b>  | <b>5 %</b>  | <b>2,5</b>  | <b>3 %</b>  | <b>1,9</b>  | <b>2 %</b>  |

Alle Prozentangaben in % vom Umsatz.  
1 Fortgeführte Aktivitäten.

nicht fortgeführten Aktivitäten 44 Mio. EUR, einschließlich Aufwendungen in Verbindung mit rechtlichen und regulatorischen Sachverhalten, gegenüber einem Gewinn von 40 Mio. EUR im Vorjahr. Für weitere Informationen zu den nicht fortgeführten Aktivitäten siehe »Anhang zum Konzernabschluss«.

Der **Gewinn (nach Steuern)** für Siemens betrug im Geschäftsjahr 2010 4,068 Mrd. EUR, im Vergleich zu 2,497 Mrd. EUR im Vorjahr. Der auf die Aktionäre der Siemens AG entfallende Gewinn belief sich auf 3,899 Mrd. EUR und lag damit über dem Vorjahreswert von 2,292 Mrd. EUR.

## SEGMENTINFORMATIONEN

### Sektoren

#### Industry

| (in Mio. EUR)                                                | Geschäftsjahresende<br>30. September |        | Veränderung in %<br>gegenüber Vorjahr |                          | darin   |           |
|--------------------------------------------------------------|--------------------------------------|--------|---------------------------------------|--------------------------|---------|-----------|
|                                                              | 2010                                 | 2009   | Ist                                   | Vglb. Basis <sup>1</sup> | Währung | Portfolio |
| Ergebnis                                                     | 3.478                                | 2.701  | 29 %                                  |                          |         |           |
| Ergebnismarge                                                | 10,0 %                               | 7,7 %  |                                       |                          |         |           |
| Auftragseingang                                              | 34.908                               | 33.284 | 5 %                                   | 3 %                      | 2 %     | - 1 %     |
| Umsatz                                                       | 34.869                               | 35.043 | 0 %                                   | - 2 %                    | 2 %     | - 1 %     |
| Externer Umsatz                                              | 33.728                               | 33.915 | - 1 %                                 |                          |         |           |
| Davon:                                                       |                                      |        |                                       |                          |         |           |
| Europa, GUS <sup>2</sup> , Afrika, Naher und Mittlerer Osten | 18.127                               | 19.243 | - 6 %                                 |                          |         |           |
| darin Deutschland                                            | 6.652                                | 6.636  | 0 %                                   |                          |         |           |
| Amerika                                                      | 8.215                                | 8.323  | - 1 %                                 |                          |         |           |
| Asien, Australien                                            | 7.386                                | 6.349  | 16 %                                  |                          |         |           |

<sup>1</sup> Bereinigt um Währungsumrechnungs- und Portfolioeffekte. <sup>2</sup> Gemeinschaft Unabhängiger Staaten.

Das Ergebnis des Sektors **Industry** legte im Vorjahresvergleich um 29 % auf 3,478 Mrd. EUR zu. Die erfolgreiche Umsetzung von Profitabilitätsprogrammen führte zu einer verbesserten Kapazitätsauslastung und Kostenkontrolle. Diese Faktoren zeigten sich besonders deutlich in den kurzzyklischen Geschäften des Sektors, die sich in der ersten Hälfte des Geschäftsjahrs von der Wirtschaftskrise zu erholen begannen. Alle Divisionen außer Industry Solutions erreichten einen Ergebnisanstieg gegenüber dem Vorjahr, mit den höchsten Zuwachsraten bei OSRAM und Industry Automation. Eine Reihe von Faktoren belastete das Ergebnis des Sektors in beiden Berichtsperioden. Die aktuelle Berichtsperiode enthält Belastungen für Personalanpassungsmaßnahmen von 200 Mio. EUR, Aufwendungen in Zusammenhang mit einer aktuellen Anpassung der erwarteten Kosten bei einem Projekt mit einem lokalen Partner in den USA von 205 Mio. EUR und eine Rückstellung für eine lieferantenbezogene Gewährleistung. Diese Faktoren wurden nur teilweise durch Erträge von 76 Mio. EUR in Verbindung mit der Anpassung von Pensionsplänen in den USA, die die Ergebnisse in allen Divisionen positiv beeinflus-

ten, und einen Nettoertrag von 47 Mio. EUR aus der Veräußerung des Flugfeldbefeuerungsgeschäfts der Division Mobility kompensiert. Die Ergebnisentwicklung im Geschäftsjahr 2009 wurde belastet durch Kosten für Personalanpassungsmaßnahmen, die sich auf 173 Mio. EUR im vierten Quartal beliefen, sowie einen Aufwand von 40 Mio. EUR bei OSRAM für wesentliche Wertminderungen und Abschreibungen auf das Vorratsvermögen.

Der Umsatz des Sektors Industry blieb auf dem Niveau des Vorjahrs. Während die oben erwähnte Erholung der kurzzyklischen Geschäfte zu höheren Umsätzen bei OSRAM und Industry Automation führte, stabilisierte sich das Marktumfeld für die langzyklischen Geschäfte des Sektors erst gegen Ende des Geschäftsjahrs. Regional betrachtet kompensierte ein prozentual zweistelliges Wachstum in Asien, Australien einen Umsatzrückgang in Europa, GUS, Afrika, Naher und Mittlerer Osten. Der Auftragseingang stieg im Vergleich zum Vorjahr um 5 % und wurde durch Zuwächse in allen Divisionen außer der Division Mobility gestützt, die ein geringeres Volumen aus

Großaufträgen zu verzeichnen hatte. Der Anstieg wurde durch eine erhöhte Nachfrage in Amerika getrieben, während der Auftragseingang in den anderen Regionen im Vorjahresvergleich nahezu stabil blieb. Der Auftragsbestand des Sektors Industry belief sich zum Ende des Geschäftsjahrs 2010

auf 28 Mrd. EUR und lag damit auf Vorjahresniveau. Industry erwartet, dass vom aktuellen Auftragsbestand 14 Mrd. EUR im Geschäftsjahr 2011 in Umsatz umgesetzt werden können, 7 Mrd. EUR im Geschäftsjahr 2012 und der Rest in den nachfolgenden Berichtsperioden.

#### Auftragseingang nach Divisionen

| (in Mio. EUR)                      | Geschäftsjahresende<br>30. September |       | Veränderung in %<br>gegenüber Vorjahr |                          | darin   |           |
|------------------------------------|--------------------------------------|-------|---------------------------------------|--------------------------|---------|-----------|
|                                    | 2010                                 | 2009  | Ist                                   | Vglb. Basis <sup>1</sup> | Währung | Portfolio |
| Industry Automation <sup>2,3</sup> | 6.421                                | 5.571 | 15%                                   | 13%                      | 2%      | 0%        |
| Drive Technologies                 | 6.981                                | 6.511 | 7%                                    | 5%                       | 2%      | 0%        |
| Building Technologies <sup>2</sup> | 7.132                                | 6.910 | 3%                                    | 1%                       | 3%      | 0%        |
| OSRAM                              | 4.681                                | 4.036 | 16%                                   | 14%                      | 3%      | - 1%      |
| Industry Solutions                 | 6.203                                | 6.101 | 2%                                    | - 1%                     | 3%      | 0%        |
| Mobility                           | 5.885                                | 6.766 | - 13%                                 | - 14%                    | 2%      | - 1%      |

- 1 Bereinigt um Währungsumrechnungs- und Portfolioeffekte.
- 2 Zu Beginn des Geschäftsjahrs 2010 wurde das Niederspannungsschaltanlagen-geschäft von Industry Automation zu Building Technologies übertragen. Vorjahreswerte wurden rückwirkend vergleichbar dargestellt.
- 3 Zu Beginn des Geschäftsjahrs 2010 wurde eine Fertigungsstätte von Industry Automation zu Drive Technologies übertragen. Vorjahreswerte wurden rückwirkend vergleichbar dargestellt.

#### Umsatz nach Divisionen

| (in Mio. EUR)                      | Geschäftsjahresende<br>30. September |       | Veränderung in %<br>gegenüber Vorjahr |                          | darin   |           |
|------------------------------------|--------------------------------------|-------|---------------------------------------|--------------------------|---------|-----------|
|                                    | 2010                                 | 2009  | Ist                                   | Vglb. Basis <sup>1</sup> | Währung | Portfolio |
| Industry Automation <sup>2,3</sup> | 6.226                                | 5.763 | 8%                                    | 6%                       | 2%      | 0%        |
| Drive Technologies                 | 6.960                                | 7.526 | - 8%                                  | - 9%                     | 2%      | 0%        |
| Building Technologies <sup>2</sup> | 6.903                                | 7.007 | - 1%                                  | - 3%                     | 2%      | 0%        |
| OSRAM                              | 4.681                                | 4.036 | 16%                                   | 14%                      | 3%      | - 1%      |
| Industry Solutions                 | 6.040                                | 6.804 | - 11%                                 | - 13%                    | 2%      | 0%        |
| Mobility                           | 6.508                                | 6.442 | 1%                                    | 1%                       | 2%      | - 2%      |

- 1 Bereinigt um Währungsumrechnungs- und Portfolioeffekte.
- 2 Zu Beginn des Geschäftsjahrs 2010 wurde das Niederspannungsschaltanlagen-geschäft von Industry Automation zu Building Technologies übertragen. Vorjahreswerte wurden rückwirkend vergleichbar dargestellt.
- 3 Zu Beginn des Geschäftsjahrs 2010 wurde eine Fertigungsstätte von Industry Automation zu Drive Technologies übertragen. Vorjahreswerte wurden rückwirkend vergleichbar dargestellt.

#### Ergebnis und Ergebnismarge nach Divisionen

| (in Mio. EUR)                      | Geschäftsjahresende 30. September |      |  | Ergebnis<br>Veränderung in % | Ergebnismarge<br>Geschäftsjahresende 30. September |       |
|------------------------------------|-----------------------------------|------|--|------------------------------|----------------------------------------------------|-------|
|                                    | 2010                              | 2009 |  |                              | 2010                                               | 2009  |
| Industry Automation <sup>1</sup>   | 1.048                             | 681  |  | 54%                          | 16,8%                                              | 11,8% |
| Drive Technologies                 | 855                               | 836  |  | 2%                           | 12,3%                                              | 11,1% |
| Building Technologies <sup>1</sup> | 456                               | 340  |  | 34%                          | 6,6%                                               | 4,9%  |
| OSRAM                              | 569                               | 89   |  | > 200%                       | 12,2%                                              | 2,2%  |
| Industry Solutions                 | 39                                | 360  |  | - 89%                        | 0,7%                                               | 5,3%  |
| Mobility                           | 513                               | 390  |  | 32%                          | 7,9%                                               | 6,1%  |

- 1 Zu Beginn des Geschäftsjahrs 2010 wurde das Niederspannungsschaltanlagen-geschäft von Industry Automation zu Building Technologies übertragen. Vorjahreswerte wurden rückwirkend vergleichbar dargestellt.



Das Ergebnis bei **Industry Automation** stieg im Vorjahresvergleich um 54%. Der Anstieg ist auf einen verbesserten Geschäftsmix, eine höhere Kapazitätsauslastung und die Umsetzung von Profitabilitätsmaßnahmen zurückzuführen. Die Division buchte Kosten für Personalanpassungsmaßnahmen von 25 Mio. EUR, im Vergleich zu Nettoaufwendungen von 22 Mio. EUR im vierten Quartal des Geschäftsjahrs 2009. Das Ergebnis in der abgelaufenen Periode profitierte von einem Gewinn von 19 Mio. EUR aus dem Verkauf eines Geschäfts. Beide Geschäftsjahre enthielten Effekte aus der Kaufpreisallokation (Purchase Price Allocation, PPA) in Zusammenhang mit dem Kauf von UGS Corp. im Geschäftsjahr 2007. Im Geschäftsjahr 2010 beliefen sich die PPA-Effekte auf 142 Mio. EUR, gegenüber 138 Mio. EUR im Vorjahr. Der Umsatz und der Auftragseingang legten im Vorjahresvergleich zu, was zum Teil auf die Erholung der Kundennachfrage in der Automatisierungstechnik zurückzuführen war. Hier waren auch vorübergehende Wiederbeschaffungseffekte bei den Kunden zu verzeichnen. Der Auftragseingang nahm in allen drei Regionen zu, wobei Asien, Australien den stärksten Anstieg verzeichnete. Der Umsatz legte in Asien, Australien zu, während er in den anderen Regionen stabil blieb.

Das Ergebnis bei **Drive Technologies** verbesserte sich im aktuellen Geschäftsjahr von Quartal zu Quartal und belief sich auf insgesamt 855 Mio. EUR. Der Aufwand für Personalanpassungsmaßnahmen betrug 37 Mio. EUR, im Vergleich zu 30 Mio. EUR im vierten Quartal des Geschäftsjahrs 2009. Der Ergebnisanstieg im Vorjahresvergleich wurde durch die kurzzyklischen Geschäfte der Division getrieben, deren Märkte sich nach einem starken Einbruch im Geschäftsjahr 2009 im Verlauf des Geschäftsjahrs 2010 stetig erholten. Dieser Trend wurde auch durch eine hohe Nachfrage im Maschinenbausektor bestätigt. Die Marktbedingungen für die langzyklischen Geschäfte der Division hingegen begannen sich erst zum Ende des Geschäftsjahrs 2010 zu verbessern. Der Umsatz lag insbesondere infolge eines Umsatzrückgangs in der Region Europa, GUS, Afrika, Naher und Mittlerer Osten unter dem Vorjahreswert. Der Auftragseingang stieg im Vorjahresvergleich um 7%, was auf die Verbesserung der kurzzyklischen Geschäfte im Vergleich zum vorherigen Geschäftsjahr zurückzuführen war.

**Building Technologies** lieferte im Geschäftsjahr 2010 einen Ergebnisbeitrag von 456 Mio. EUR. Der deutliche Anstieg gegenüber dem Geschäftsjahr 2009 wurde von einer starken Ergebnisentwicklung bei der Steuerungstechnik und einem Umschwung im Geschäft mit Niederspannungsschaltanlagen getrieben. Der Aufwand für Personalanpassungsmaßnahmen betrug im aktuellen Geschäftsjahr 24 Mio. EUR, gegenüber 29

Mio. EUR im vierten Quartal 2009. Die oben erwähnte Rückstellung für eine lieferantenbezogene Gewährleistung wurde größtenteils durch den ebenfalls oben erwähnten, auf die Division entfallenden Anteil des Pensionsertrags kompensiert. Der Umsatz lag um 1% unter dem Vorjahreswert, da Umsatzzuwächse in Asien, Australien durch einen Umsatzrückgang in anderen Regionen mehr als kompensiert wurden. Der Auftragseingang stieg um 3% aufgrund höherer Nachfrage in Asien, Australien sowie Amerika.

Das Ergebnis bei **OSRAM** zeigte eine noch deutlich positivere Entwicklung als bei den anderen Divisionen des Sektors Industry, da die erfolgreiche Umsetzung von strukturellen Anpassungsmaßnahmen mit einer deutlichen Verbesserung der Marktbedingungen zusammentraf. Umsatzwachstum, eine höhere Kapazitätsauslastung, ein verbesserter Geschäftsmix sowie eine verbesserte Kostenstruktur führten zu einem Ergebnisanstieg auf 569 Mio. EUR. Die Gewinnentwicklung im aktuellen Geschäftsjahr profitierte darüber hinaus von dem oben erwähnten Pensionsertrag von 23 Mio. EUR, während das Ergebnis im vorherigen Geschäftsjahr durch Aufwand für Personalanpassungsmaßnahmen von 18 Mio. EUR sowie 40 Mio. EUR für wesentliche Wertminderungen und Abschreibungen auf das Vorratsvermögen im vierten Quartal belastet wurde. Das prozentual zweistellige Umsatzwachstum stützte sich auf eine hohe Nachfrage nach LED- und Automobilbeleuchtungslösungen. OSRAM beabsichtigt, in den kommenden Quartalen weiterhin in die Marktexpansion und in Produktionskapazitäten zu investieren.

**Industry Solutions** berichtete im Geschäftsjahr 2010 ein Ergebnis von 39 Mio. EUR und lag damit deutlich unter dem Vorjahresniveau. Das Ergebnis der Division wurde durch die oben erwähnte aktuelle Anpassung der erwarteten Kosten bei einem Projekt mit einem lokalen Partner in den USA von 205 Mio. EUR belastet. Zudem lag der Aufwand für Personalanpassungsmaßnahmen mit 101 Mio. EUR über dem Vorjahreswert von 69 Mio. EUR. In geringerem Maß beeinträchtigte auch eine gesunkene Kapazitätsauslastung das Ergebnis. Der Umsatz fiel im Vorjahresvergleich um 11%, was in erster Linie auf einen starken Volumeneinbruch gegenüber dem Vorjahr im großen Metals-Technologies-Geschäft zurückzuführen war. Ein hohes prozentual zweistelliges Auftragswachstum im vierten Quartal in Amerika und Europa, GUS, Afrika, Naher und Mittlerer Osten hob den Auftragseingang im Geschäftsjahr 2010 über das Vorjahresniveau.

**Mobility** steuerte im Geschäftsjahr 2010 ein Ergebnis von 513 Mio. EUR zum Sektorergebnis bei. Das Ergebnis lag damit

deutlich über dem Vorjahreswert. Dieser Anstieg ist zum Teil bedingt durch eine selektive Auftragsannahme in Vorperioden und die Umsetzung von Programmen zur Leistungssteigerung im Projektgeschäft. Das Ergebnis profitierte zudem von dem oben erwähnten Gewinn von 47 Mio. EUR aus dem Verkauf des Flugfeldbefeuerungsgeschäfts und dem Anteil der Division an den ebenfalls oben erwähnten Pensionserträ-

gen. Der Umsatz von Mobility blieb gegenüber dem Vorjahr stabil, da Wachstum in Asien, Australien Rückgänge in anderen Regionen ausglich. Der Auftragseingang bei Mobility sank gegenüber dem Vorjahr, in dem die Division ein höheres Volumen aus Großaufträgen mit einem besonders großen Auftrag für Züge in China verzeichnete.

## Energy

| Sektor                                                       | Geschäftsjahresende<br>30. September |        | Veränderung in %<br>gegenüber Vorjahr |                          | darin   |           |
|--------------------------------------------------------------|--------------------------------------|--------|---------------------------------------|--------------------------|---------|-----------|
|                                                              | 2010                                 | 2009   | Ist                                   | Vglb. Basis <sup>1</sup> | Währung | Portfolio |
| (in Mio. EUR)                                                |                                      |        |                                       |                          |         |           |
| Ergebnis                                                     | 3.562                                | 3.315  | 7 %                                   |                          |         |           |
| Ergebnismarge                                                | 14,0 %                               | 12,9 % |                                       |                          |         |           |
| Auftragseingang                                              | 30.122                               | 30.076 | 0 %                                   | - 2 %                    | 2 %     | 0 %       |
| Umsatz                                                       | 25.520                               | 25.793 | - 1 %                                 | - 4 %                    | 2 %     | 0 %       |
| Externer Umsatz                                              | 25.204                               | 25.405 | - 1 %                                 |                          |         |           |
| Davon:                                                       |                                      |        |                                       |                          |         |           |
| Europa, GUS <sup>2</sup> , Afrika, Naher und Mittlerer Osten | 14.800                               | 14.715 | 1 %                                   |                          |         |           |
| darin Deutschland                                            | 2.118                                | 1.905  | 11 %                                  |                          |         |           |
| Amerika                                                      | 6.558                                | 6.552  | 0 %                                   |                          |         |           |
| Asien, Australien                                            | 3.847                                | 4.138  | - 7 %                                 |                          |         |           |

<sup>1</sup> Bereinigt um Währungsumrechnungs- und Portfolioeffekte. <sup>2</sup> Gemeinschaft Unabhängiger Staaten.

Der Sektor **Energy** zeigte besondere operative Stärke im Geschäftsjahr 2010. Trotz eines leichten Umsatzrückgangs gegenüber dem Geschäftsjahr 2009 sowie gestiegener FuE-, Marketing- und Vertriebskosten in Zusammenhang mit Wachstum in der zweiten Geschäftsjahreshälfte erhöhte der Sektor sein Ergebnis im Vorjahresvergleich um 7 % auf 3,562 Mrd. EUR. Das Ergebniswachstum wurde in erster Line von der Division Fossil Power Generation getragen und stützte sich dort vor allem auf eine starke Projektabwicklung und einen günstigeren Umsatzmix. Power Transmission trug ebenfalls – wenn auch zu einem geringeren Teil – zum höheren Ergebnis bei. Die anderen Divisionen des Sektors verzeichneten jeweils einen moderaten Ergebnisrückgang im Vergleich zum Vorjahr.

In der ersten Hälfte des aktuellen Geschäftsjahrs waren die Marktbedingungen für den Sektor Energy schwierig, da es kundenseitig auch weiterhin zu den schon im Geschäftsjahr 2009 begonnenen Verschiebungen großer Infrastrukturprojekte kam. In der zweiten Geschäftsjahreshälfte verbesserten sich die Bedingungen – eine Entwicklung, die sich insbesondere auch in einem starken Wachstum bei den Großaufträgen zeigte. Deshalb lag der Auftragseingang des Sektors im Ge-

schäftsjahr 2010 mit insgesamt 30,122 Mrd. EUR leicht über dem Vorjahreswert. Der Auftragseingang legte bei allen Divisionen außer Fossil Power Generation zu, da hier in den ersten drei Quartalen des Geschäftsjahrs ein deutlich geringeres Volumen aus Großaufträgen zu verzeichnen war. Aus geografischer Sicht kompensierte der Auftragsanstieg in Amerika und Asien, Australien eine geringere Nachfrage in der Region Europa, GUS, Afrika, Naher und Mittlerer Osten. Der Umsatz lag mit 25,520 Mrd. EUR um 1 % unter dem Vorjahreswert. Dabei konnte ein prozentual zweistelliges Umsatzwachstum bei Renewable Energy Rückgänge in den anderen Divisionen fast vollständig ausgleichen. Aus geografischer Sicht lag der Umsatz in Europa, GUS, Afrika, Naher und Mittlerer Osten leicht über dem Vorjahr, in Amerika auf Vorjahresniveau und wies in Asien, Australien eine rückläufige Entwicklung aus. Das Book-to-Bill-Verhältnis des Sektors belief sich auf 1,18, und der Auftragsbestand stieg zum Ende des Geschäftsjahrs 2010 auf 53 Mrd. EUR, gegenüber 47 Mrd. EUR im Vorjahr. Energy erwartet, dass vom aktuellen Auftragsbestand 21 Mrd. EUR im Geschäftsjahr 2011 in Umsatz umgesetzt werden können, 11 Mrd. EUR im Geschäftsjahr 2012 und der Rest in den nachfolgenden Berichtsperioden.

### Auftragseingang nach Divisionen

| (in Mio. EUR)           | Geschäftsjahresende<br>30. September |        | Veränderung in %<br>gegenüber Vorjahr |                          | Währung | darin<br>Portfolio |
|-------------------------|--------------------------------------|--------|---------------------------------------|--------------------------|---------|--------------------|
|                         | 2010                                 | 2009   | Ist                                   | Vglb. Basis <sup>1</sup> |         |                    |
| Fossil Power Generation | 9.920                                | 12.135 | - 18 %                                | - 20 %                   | 2 %     | 0 %                |
| Renewable Energy        | 5.929                                | 4.823  | 23 %                                  | 22 %                     | 1 %     | 0 %                |
| Oil & Gas               | 4.943                                | 4.450  | 11 %                                  | 7 %                      | 4 %     | 0 %                |
| Power Transmission      | 6.770                                | 6.324  | 7 %                                   | 5 %                      | 2 %     | 0 %                |
| Power Distribution      | 3.231                                | 3.018  | 7 %                                   | 4 %                      | 3 %     | 0 %                |

<sup>1</sup> Bereinigt um Währungsumrechnungs- und Portfolioeffekte.

### Umsatz nach Divisionen

| (in Mio. EUR)           | Geschäftsjahresende<br>30. September |       | Veränderung in %<br>gegenüber Vorjahr |                          | Währung | darin<br>Portfolio |
|-------------------------|--------------------------------------|-------|---------------------------------------|--------------------------|---------|--------------------|
|                         | 2010                                 | 2009  | Ist                                   | Vglb. Basis <sup>1</sup> |         |                    |
| Fossil Power Generation | 9.550                                | 9.802 | - 3 %                                 | - 3 %                    | 1 %     | 0 %                |
| Renewable Energy        | 3.272                                | 2.935 | 11 %                                  | 5 %                      | 3 %     | 3 %                |
| Oil & Gas               | 4.156                                | 4.276 | - 3 %                                 | - 6 %                    | 4 %     | 0 %                |
| Power Transmission      | 6.143                                | 6.172 | 0 %                                   | - 4 %                    | 3 %     | 0 %                |
| Power Distribution      | 3.039                                | 3.284 | - 7 %                                 | - 10 %                   | 3 %     | 0 %                |

<sup>1</sup> Bereinigt um Währungsumrechnungs- und Portfolioeffekte.

### Ergebnis und Ergebnismarge nach Divisionen

| (in Mio. EUR)           | Geschäftsjahresende 30. September |       | Ergebnis         | Ergebnismarge                             |                                           |
|-------------------------|-----------------------------------|-------|------------------|-------------------------------------------|-------------------------------------------|
|                         | 2010                              | 2009  | Veränderung in % | Geschäftsjahresende 30. September<br>2010 | Geschäftsjahresende 30. September<br>2009 |
| Fossil Power Generation | 1.516                             | 1.275 | 19 %             | 15,9 %                                    | 13,0 %                                    |
| Renewable Energy        | 368                               | 382   | - 4 %            | 11,3 %                                    | 13,0 %                                    |
| Oil & Gas               | 487                               | 499   | - 2 %            | 11,7 %                                    | 11,7 %                                    |
| Power Transmission      | 763                               | 725   | 5 %              | 12,4 %                                    | 11,7 %                                    |
| Power Distribution      | 422                               | 435   | - 3 %            | 13,9 %                                    | 13,2 %                                    |

**Fossil Power Generation** lieferte mit 1,516 Mrd. EUR erneut den höchsten Ergebnisbeitrag aller Siemens-Divisionen im Geschäftsjahr 2010. Der Anstieg um 19% im Vergleich zum Vorjahr stützte sich auf eine starke Projektabwicklung sowie einen günstigeren Umsatzmix, einschließlich eines höheren Beitrags aus dem Dienstleistungsgeschäft. Aufwendungen in Höhe von 57 Mio. EUR für Kapazitätsanpassungen in Zusammenhang mit der Verlagerung von Produktionskapazitäten innerhalb der Region Amerika wurden zum Teil durch den Anteil der Division am Pensionsertrag kompensiert. Die Auftragsentwicklung bei Fossil Power Generation wurde stark durch eine rückläufige Marktentwicklung in den ersten drei Quartalen

des Geschäftsjahrs beeinträchtigt, in denen auch der oben erwähnte starke Rückgang bei den Großaufträgen zu verzeichnen war. Eine starke Nachfrage im vierten Quartal begrenzte den Auftragsrückgang im Gesamtgeschäftsjahr auf 18%. Aufgrund des hohen Auftragsbestands der Division blieb die Umsatzentwicklung im Verlauf des Jahres hingegen relativ stabil, und der Umsatz lag um 3% unter dem Vorjahreswert.

Das Ergebnis bei **Renewable Energy** fiel im Vergleich zum Geschäftsjahr 2009 um 4% auf 368 Mio. EUR. Der Rückgang war auf hohe Aufwendungen und Investitionen für die Expansion des Windgeschäfts und den Aufbau des Solargeschäfts der

Division zurückzuführen, einschließlich Transaktions- und Integrationskosten in Zusammenhang mit der Konsolidierung des Solarunternehmens Solel. Zusammen mit negativen operativen Ergebnissen resultierten diese Transaktions- und Integrationskosten im Geschäftsjahr 2010 in einem Nettoverlust in Zusammenhang mit dem akquirierten Solel-Geschäft. Nach einem saisonal bedingt schwächeren ersten Quartal legte der Umsatz in allen drei Folgequartalen gegenüber dem jeweiligen Vorjahresquartal und dem Vorquartal zu und stieg im Gesamtjahr um 11%. Wie schon in den Vorjahren zeigte sich das Auftragswachstum im Vergleich zum Umsatz deutlich volatiler in der Quartalsentwicklung. Die Division gewann weitere große Aufträge für Windparks in Europa und Amerika und erreichte im Gesamtjahr ein Auftragswachstum von 23%. Renewable Energy erwartet, dass die Profitabilität in der ersten Hälfte des Geschäftsjahrs 2011 in Zusammenhang mit dem Aufbau des Solargeschäfts und saisonalen Effekten im Windgeschäft beeinträchtigt werden wird.

Das Ergebnis bei **Oil & Gas** lag mit 487 Mio. EUR um 2% unter dem Vorjahreswert. Dies war im Wesentlichen auf einen Umsatzrückgang von 3% zurückzuführen, der in erster Linie aus dem Kompressions- und Lösungsgeschäft der Division resultierte. Der Auftragseingang legte im Verlauf des Geschäftsjahrs stetig zu und lag insgesamt um 11% über dem Vorjahresniveau, unter anderem getrieben durch eine hohe Nachfrage im Industrieturbinengeschäft.

**Power Transmission** verzeichnete einen Ergebnisanstieg von 5% auf 763 Mio. EUR. Während die Ergebnisentwicklung zum Teil durch einen erhöhten Preisdruck – überwiegend ausgelöst durch neue Marktteilnehmer – beeinträchtigt wurde, profitierte die Division im Vorjahresvergleich von einer positiven Veränderung bei den Effekten aus der Rohstoffpreisabsicherung und zeigte zudem ihre operative Stärke im Projektgeschäft. Ausgehend von einem relativ niedrigen Niveau im ersten Quartal des Geschäftsjahrs 2010 gelang es der Division, ihren Umsatz im Verlauf des Geschäftsjahrs stetig zu steigern. Dank eines besonders starken vierten Quartals im Transformatorengeschäft lag der Umsatz für das Gesamtgeschäftsjahr nur leicht unter dem Vorjahreswert. Aufgrund eines höheren Volumens aus Großaufträgen, einschließlich großer Bestellungen für Netzzugänge für Offshore-Windparks, stieg der Auftragseingang der Division im Vergleich zum Vorjahr um 7%.

Das Ergebnis bei **Power Distribution** lag mit 422 Mio. EUR um 3% unter dem Vorjahreswert. Dies war im Wesentlichen auf einen Umsatzrückgang von 7% zurückzuführen. Sowohl die Umsatz- als auch die Ergebnisentwicklung wurden im Wesentlichen durch das Mittelspannungsgeschäft der Division beeinträchtigt, das im Vergleich zum Geschäftsjahr 2009 prozentual zweistellige Rückgänge bei Umsatz und Ergebnis zu verzeichnen hatte. Der Auftragseingang der Division lag dank eines starken vierten Quartals, das eine schwächere Nachfrage zu Beginn des Geschäftsjahrs mehr als kompensierte, um 7% über dem Vorjahreswert.

## Healthcare

### Sektor

| (in Mio. EUR)                                                     | Geschäftsjahresende<br>30. September |        | Veränderung in %<br>gegenüber Vorjahr |                          | darin   |           |
|-------------------------------------------------------------------|--------------------------------------|--------|---------------------------------------|--------------------------|---------|-----------|
|                                                                   | 2010                                 | 2009   | Ist                                   | Vglb. Basis <sup>1</sup> | Währung | Portfolio |
| Ergebnis                                                          | 748                                  | 1.450  | - 48%                                 |                          |         |           |
| Ergebnismarge                                                     | 6,1%                                 | 12,2%  |                                       |                          |         |           |
| Auftragseingang                                                   | 12.872                               | 11.950 | 8%                                    | 5%                       | 3%      | 0%        |
| Umsatz                                                            | 12.364                               | 11.927 | 4%                                    | 1%                       | 3%      | 0%        |
| Externer Umsatz                                                   | 12.280                               | 11.864 | 4%                                    |                          |         |           |
| <i>Davon:</i>                                                     |                                      |        |                                       |                          |         |           |
| <i>Europa, GUS<sup>2</sup>, Afrika, Naher und Mittlerer Osten</i> | 4.680                                | 4.724  | - 1%                                  |                          |         |           |
| <i>darin Deutschland</i>                                          | 1.056                                | 1.072  | - 1%                                  |                          |         |           |
| <i>Amerika</i>                                                    | 5.141                                | 5.153  | 0%                                    |                          |         |           |
| <i>Asien, Australien</i>                                          | 2.459                                | 1.986  | 24%                                   |                          |         |           |

<sup>1</sup> Bereinigt um Währungsumrechnungs- und Portfolioeffekte. <sup>2</sup> Gemeinschaft Unabhängiger Staaten.

Das Geschäftsjahr 2010 sah eine deutliche Verbesserung der Bedingungen auf dem weltweiten Gesundheitsmarkt mit besonders massiven Zuwächsen bei Investitionen in medizinische Geräte in den Schwellenländern. Ferner sorgte die Verabschiedung der Gesundheitsreform in den USA dafür, dass die Unsicherheit aus dem Markt genommen wurde, und trug zu einer Abschwächung der Investitionszurückhaltung seitens der Kunden bei.

Im Geschäftsjahr 2010 lag der Auftragseingang des Sektors **Healthcare** um 8 % über dem Vorjahreswert. Der Sektor verzeichnete ein Auftragswachstum in den Divisionen Imaging & IT und Diagnostics in Amerika, insbesondere in den USA, sowie in Asien, Australien. Der Umsatz legte im Geschäftsjahr 2010 im Vorjahresvergleich um 4 % zu. Dabei verzeichnen alle Divisionen prozentual zweistellige Zuwachsraten in der Region Asien, Australien. In der Region Europa, GUS, Afrika, Naher und Mittlerer Osten blieben Auftrags- und Umsatzentwicklung stabil. Auf organischer Basis, nach Bereinigung um die erheblichen positiven Währungsumrechnungseffekte, lagen der Auftragseingang um 5 % und der Umsatz um 1 % über dem Vorjahreswert. Das Book-to-Bill-Verhältnis des Sektors Healthcare belief sich im Geschäftsjahr 2010 auf 1,04, und der Auftragsbestand betrug zum Ende des Geschäftsjahrs 7 Mrd. EUR, gegenüber 6 Mrd. EUR im Vorjahr. Healthcare erwartet, dass vom aktuellen Auftragsbestand 3,5 Mrd. EUR im Geschäfts-

jahr 2011 in Umsatz umgesetzt werden können, 1,3 Mrd. EUR im Geschäftsjahr 2012 und der Rest in den nachfolgenden Berichtsperioden.

Das Sektorergebnis von 748 Mio. EUR im Geschäftsjahr 2010 wurde durch Wertminderungen, einschließlich einer Firmenwertabschreibung, von 1,204 Mrd. EUR in der Division Diagnostics im vierten Quartal belastet. Im Geschäftsjahr aufgetretene positive Effekte wurden durch diese Wertminderungen mehr als kompensiert. Hierzu gehörten ein Ertrag von 79 Mio. EUR in Verbindung mit der Kürzung von Pensionsplänen in den USA sowie ein Ertrag von 40 Mio. EUR auf Sektorebene, nachdem aufgrund des Verlusts des beherrschenden Einflusses die Konsolidierung einer Tochtergesellschaft beim Sektor beendet wurde. Die Ergebnisentwicklung im Vorjahresvergleich beinhaltet positive Effekte in Zusammenhang mit der Währungsentwicklung, insbesondere eine ungünstige Währungsabsicherung im Vorjahr. Beide Geschäftsjahre enthalten Aufwendungen bei Workflow & Solutions in Verbindung mit Partikeltherapieverträgen. Im Geschäftsjahr 2010 erfasste Diagnostics PPA-Effekte von 178 Mio. EUR in Zusammenhang mit früheren Akquisitionen. Im Vorjahr verzeichnete die Division PPA-Effekte und Integrationskosten von insgesamt 248 Mio. EUR. Im Geschäftsjahr 2010 erfasste der Sektor Aufwendungen in Höhe von 90 Mio. EUR für Integrationsaktivitäten bei Diagnostics.

#### Auftragseingang nach Divisionen

| (in Mio. EUR)        | Geschäftsjahresende<br>30. September |       | Veränderung in %<br>gegenüber Vorjahr |                          | darin   |           |
|----------------------|--------------------------------------|-------|---------------------------------------|--------------------------|---------|-----------|
|                      | 2010                                 | 2009  | Ist                                   | Vglb. Basis <sup>1</sup> | Währung | Portfolio |
| Imaging & IT         | 7.961                                | 7.143 | 11 %                                  | 9 %                      | 3 %     | 0 %       |
| Workflow & Solutions | 1.498                                | 1.553 | - 4 %                                 | - 6 %                    | 3 %     | 0 %       |
| Diagnostics          | 3.664                                | 3.479 | 5 %                                   | 3 %                      | 3 %     | 0 %       |

<sup>1</sup> Bereinigt um Währungsumrechnungs- und Portfolioeffekte.

#### Umsatz nach Divisionen

| (in Mio. EUR)        | Geschäftsjahresende<br>30. September |       | Veränderung in %<br>gegenüber Vorjahr |                          | darin   |           |
|----------------------|--------------------------------------|-------|---------------------------------------|--------------------------|---------|-----------|
|                      | 2010                                 | 2009  | Ist                                   | Vglb. Basis <sup>1</sup> | Währung | Portfolio |
| Imaging & IT         | 7.419                                | 7.152 | 4 %                                   | 2 %                      | 2 %     | 0 %       |
| Workflow & Solutions | 1.522                                | 1.515 | 0 %                                   | - 2 %                    | 2 %     | 0 %       |
| Diagnostics          | 3.667                                | 3.490 | 5 %                                   | 2 %                      | 3 %     | 0 %       |

<sup>1</sup> Bereinigt um Währungsumrechnungs- und Portfolioeffekte.

## Ergebnis und Ergebnismarge nach Divisionen

| (in Mio. EUR)        | Geschäftsjahresende 30. September |       | Ergebnis<br>Veränderung in % | Ergebnismarge                             |         |
|----------------------|-----------------------------------|-------|------------------------------|-------------------------------------------|---------|
|                      | 2010                              | 2009  |                              | Geschäftsjahresende 30. September<br>2010 | 2009    |
| Imaging & IT         | 1.452                             | 1.161 | 25 %                         | 19,6 %                                    | 16,2 %  |
| Workflow & Solutions | 27                                | - 53  | -                            | 1,8 %                                     | - 3,5 % |
| Diagnostics          | - 776                             | 338   | -                            | - 21,2 %                                  | 9,7 %   |

Das Ergebnis bei **Imaging & IT** stieg im Vorjahresvergleich um 25 % auf 1,452 Mrd. EUR, gestützt von einem höheren Umsatz, einem günstigen Produktmix und weiteren Kosteneinsparungen. Das Ergebniswachstum im Vorjahresvergleich profitierte von positiven Effekten in Zusammenhang mit der Währungsentwicklung, darin enthalten eine ungünstige Währungsabsicherung im Vorjahr. Zudem profitierte das Ergebnis im aktuellen Geschäftsjahr mit 44 Mio. EUR von dem zuvor für den Sektor erwähnten Pensionsertrag. Der Auftragseingang legte im Vergleich zum Vorjahr um 11 % zu, und der Umsatz stieg um 4 %. Wie für den Sektor insgesamt zeigte der Auftragseingang bei Imaging & IT ein starkes Wachstum in Amerika und Asien, Australien, während die Aufträge in Europa, GUS, Afrika, Naher und Mittlerer Osten stabil blieben. Ein prozentual zweistelliges Umsatzwachstum in Asien, Australien stützte sich auf deutliche Zuwachsraten in Japan, China und Indien. Auf organischer Basis legte der Auftragseingang um 9 % zu, und der Umsatz stieg um 2 %.

**Workflow & Solutions** lieferte einen Ergebnisbeitrag von 27 Mio. EUR, im Vergleich zu einem Verlust von 53 Mio. EUR im Vorjahr. Beide Geschäftsjahre enthielten, wie oben erwähnt, Aufwendungen in Zusammenhang mit Partikeltherapieverträgen, die sich im Geschäftsjahr 2010 auf 96 Mio. EUR und im Geschäftsjahr 2009 auf 169 Mio. EUR beliefen. Die Belastungen entstanden in Zusammenhang mit Tests von Prototyp-Technologien, die zu einer geänderten Einschätzung der Kosten für die Fertigstellung der Projekte führten. Der Auftragseingang lag im Geschäftsjahr 2010 um 4 % unter dem Vorjahreswert. Der Umsatz entwickelte sich stabil gegenüber dem vorherigen Geschäftsjahr.

**Diagnostics** berichtete im Geschäftsjahr 2010 einen Verlust von 776 Mio. EUR, gegenüber einem Gewinn von 338 Mio. EUR im Vorjahr, was in erster Linie auf die oben erwähnten Wertminderungen zurückzuführen war. Siemens beendete im

vierten Quartal eine strategische Überprüfung, die die mittelfristigen Wachstumschancen der Division und die langfristige Marktentwicklung des Labordiagnostikbereichs neu bewertete, und führte korrespondierend die jährliche Überprüfung der Werthaltigkeit der Firmenwerte durch. Der Aufwand für Wertminderungen von 1,204 Mrd. EUR enthielt 1,145 Mrd. EUR für Firmenwertabschreibungen und 39 Mio. EUR für Wertminderungen auf Immobilien. Für weitere Informationen zum Firmenwert in der Division Diagnostics verweisen wir auf das Kapitel »Vermögenslage« und den »Anhang zum Konzernabschluss«. Die Division erfasste geringere Vertriebs- und allgemeine Verwaltungskosten (SG&A-Kosten), außerdem profitierte das Ergebnis mit 22 Mio. EUR aus dem zuvor erwähnten Ertrag aus Pensionskürzungen. PPA-Effekte aus früheren Akquisitionen beliefen sich im Geschäftsjahr 2010 auf 178 Mio. EUR. Zudem erfasste die Division Integrationskosten von 90 Mio. EUR. Im Vorjahr beliefen sich die PPA-Effekte und Integrationskosten auf insgesamt 248 Mio. EUR. Der Auftragseingang und der Umsatz stiegen im Geschäftsjahr 2010 um jeweils 5 % im Vergleich zum Vorjahr und profitierten dabei in hohem Maße von positiven Währungsumrechnungseffekten. Regional betrachtet wurden die leichten Rückgänge in Europa, GUS, Afrika, Naher und Mittlerer Osten durch das Umsatz- und Auftragswachstum in Amerika und Asien, Australien überkompensiert. Auf organischer Basis stiegen der Auftragseingang um 3 % und der Umsatz um 2 % im Vergleich zum Vorjahr.

### Equity Investments

Im Geschäftsjahr 2010 verzeichnete **Equity Investments** einen Verlust von 191 Mio. EUR, im Vergleich zu einem Verlust von 1,851 Mrd. EUR im vorherigen Geschäftsjahr. Die Veränderung resultierte im Wesentlichen aus einem deutlich höheren Verlust in Zusammenhang mit unserer Beteiligung an Nokia Siemens Networks B.V. (NSN) im Geschäftsjahr 2009, in dem wir eine Wertminderung auf unsere Beteiligung an NSN in



Höhe von 1,634 Mrd. EUR vornahmen. Der Vorjahresverlust enthielt zudem eine Belastung von 216 Mio. EUR aus einer Wertberichtigung auf aktive latente Steuern bei NSN. Zudem fielen bei NSN Restrukturierungs- und Integrationskosten von 507 Mio. EUR an. Diese Faktoren führten im Geschäftsjahr 2009 zu einem Beteiligungsverlust in Zusammenhang mit unserem Anteil an NSN in Höhe von 2,177 Mrd. EUR. Enterprise Networks Holdings B.V. (EN) verzeichnete im Geschäftsjahr 2009 ebenfalls einen operativen Verlust und Restrukturierungsaufwendungen, die im Vorjahr zu einem Beteiligungsverlust in Zusammenhang mit unserem Anteil an EN von 171 Mio. EUR führten. Diese Verluste wurden nur zum Teil durch einen Gewinn in Höhe von 327 Mio. EUR aus dem Verkauf un-

serer Anteile an FSC und einen Beteiligungsertrag von 195 Mio. EUR in Zusammenhang mit unseren Anteilen an BSH Bosch und Siemens Hausgeräte GmbH (BSH) und Krauss-Maffei Wegmann GmbH Co. KG (KMW) kompensiert. Zum Vergleich: Der anteilige Aufwand aus der Beteiligung an NSN betrug im Geschäftsjahr 2010 533 Mio. EUR. NSN erfasste im aktuellen Geschäftsjahr Restrukturierungsaufwendungen und Integrationskosten von 378 Mio. EUR. Der Beteiligungsertrag in Zusammenhang mit unseren Anteilen an BSH und KMW stieg im aktuellen Geschäftsjahr auf insgesamt 277 Mio. EUR. Es wird erwartet, dass das Ergebnis von Equity Investments in den kommenden Quartalen volatil sein wird.

### Sektorübergreifende Geschäfte Siemens IT Solutions and Services

| (in Mio. EUR)                                                     | Geschäftsjahresende<br>30. September |       | Veränderung in %<br>gegenüber Vorjahr |                          | darin   |           |
|-------------------------------------------------------------------|--------------------------------------|-------|---------------------------------------|--------------------------|---------|-----------|
|                                                                   | 2010                                 | 2009  | Ist                                   | Vglb. Basis <sup>1</sup> | Währung | Portfolio |
| Ergebnis                                                          | - 537                                | 90    | -                                     |                          |         |           |
| Ergebnismarge                                                     | - 12,9 %                             | 1,9 % |                                       |                          |         |           |
| Auftragseingang                                                   | 4.226                                | 4.501 | - 6 %                                 | - 7 %                    | 1 %     | 0 %       |
| Umsatz                                                            | 4.155                                | 4.686 | - 11 %                                | - 12 %                   | 1 %     | 0 %       |
| Externer Umsatz                                                   | 3.150                                | 3.580 | - 12 %                                |                          |         |           |
| <i>Davon:</i>                                                     |                                      |       |                                       |                          |         |           |
| <i>Europa, GUS<sup>2</sup>, Afrika, Naher und Mittlerer Osten</i> | 2.725                                | 3.129 | - 13 %                                |                          |         |           |
| <i>darin Deutschland</i>                                          | 1.118                                | 1.307 | - 14 %                                |                          |         |           |
| <i>Amerika</i>                                                    | 366                                  | 399   | - 8 %                                 |                          |         |           |
| <i>Asien, Australien</i>                                          | 59                                   | 52    | 13 %                                  |                          |         |           |

1 Bereinigt um Währungsumrechnungs- und Portfolioeffekte. 2 Gemeinschaft Unabhängiger Staaten.

Im Geschäftsjahr 2010 sah sich **Siemens IT Solutions and Services** mit operativen Herausforderungen bei einem gleichzeitig sehr wettbewerbsintensiven Umfeld konfrontiert. Daher waren der Auftragseingang im Vorjahresvergleich um 6 % und der Umsatz um 11 % rückläufig, und das Ergebnis drehte sich auf minus 537 Mio. EUR. Der Verlust resultierte in erster Linie aus Aufwand in Zusammenhang mit dem Abschluss von zuvor angekündigten Personalanpassungsmaßnahmen von 399 Mio. EUR in Verbindung mit einer strategischen Neuausrichtung, mit der die Wettbewerbsposition des Geschäfts gestärkt werden soll (für weitere Informationen siehe »Geschäft und Rahmenbedingungen – Strategie – Segment-Strategien«.

Im Geschäftsjahr 2009 betrug der Aufwand für Personalanpassungsmaßnahmen 22 Mio. EUR. Zudem beeinträchtigten projektbezogene Belastungen die Ergebnisentwicklung in beiden Berichtszeiträumen, wobei diese im aktuellen Geschäftsjahr deutlich höher waren als im Vorjahr. Zum 1. Oktober 2010 wurde Siemens IT Solutions and Services aus der Siemens AG ausgegliedert und in eine rechtlich selbstständige Einheit eingebracht. Siemens IT Solutions and Services ist nun eine 100%ige, vollkonsolidierte Tochtergesellschaft der Siemens AG. Für weitere Informationen zu Belastungen in Verbindung mit der strategischen Neuausrichtung von Siemens IT Solutions and Services siehe »Überleitung Konzernabschluss – Zentrale Posten und Pensionen«.

## Siemens Financial Services (SFS)

| (in Mio. EUR)              | Geschäftsjahresende<br>30. September |        | Veränderung in % |
|----------------------------|--------------------------------------|--------|------------------|
|                            | 2010                                 | 2009   |                  |
| Ergebnis vor Ertragsteuern | 447                                  | 304    | 47 %             |
| Gesamtvermögen             | 12.506                               | 11.704 | 7 %              |

SFS steigerte im Geschäftsjahr 2010 das Ergebnis (vor Ertragsteuern) auf 447 Mio. EUR, gegenüber 304 Mio. EUR im Vorjahr. Der Ergebnisanstieg gegenüber dem Geschäftsjahr 2009 resultierte im Wesentlichen aus einem Ergebniswachstum im gewerblichen Finanzierungsgeschäft, das aus deutlich geringeren Zuführungen zu den Vorsorgen und einem höheren Zinsergebnis resultierte. Das Ergebnis im Geschäftsjahr 2010 profitierte zudem von positiven Nettoeffekten in Verbindung mit verschiedenen Beteiligungen, einschließlich eines Gewinns in Höhe von 47 Mio. EUR aus dem Verkauf einer Beteiligung. Diese Faktoren konnten die geringeren Erträge aus dem SFS-internen Dienstleistungsgeschäft mehr als kompensieren. Das Gesamtvermögen stieg, in erster Linie aufgrund von Währungsumrechnungseffekten, auf 12,506 Mrd. EUR.

Die folgende Tabelle zeigt weitere Informationen zur Kapitalstruktur von SFS per 30. September 2010 und 2009:

| (in Mio. EUR)                                         | 30. September |              |
|-------------------------------------------------------|---------------|--------------|
|                                                       | 2010          | 2009         |
| Zugeordnetes Eigenkapital                             | 1.458         | 1.243        |
| Finanzschulden insgesamt                              | 10.028        | 9.521        |
| <i>Darin konzerninterne Verpflichtungen</i>           | <i>10.004</i> | <i>9.455</i> |
| <i>Darin Schulden gegenüber externen Finanzgebern</i> | <i>24</i>     | <i>66</i>    |
| Verschuldungsgrad                                     | 6,88          | 7,66         |
| Zahlungsmittel und Zahlungsmitteläquivalente          | 90            | 136          |

Sowohl Moody's als auch Standard & Poor's betrachten SFS als eine »Captive«-Finanzierungseinheit. Diese Ratingagenturen akzeptieren im Allgemeinen höhere Verschuldungsgrade bei »Captive«-Finanzierungseinheiten und würdigen dies bei der Vergabe von lang- und kurzfristigen Kreditratings.

Das SFS zugeordnete Eigenkapital wird von der Größe und Qualität des Portfolios der gewerblichen finanziellen Vermögenswerte (vorwiegend Leasing und Darlehen) und Beteiligungen bestimmt und beeinflusst. Diese Zuordnung ist so angelegt, dass die Risiken des zugrunde liegenden Geschäfts abgesichert sind und sich an den üblichen Bankenstandards im Kreditrisikomanagement orientieren. Das tatsächliche Risikoprofil des SFS-Portfolios wird monatlich bewertet und überprüft und bei den regelmäßigen Anpassungen des zugeordneten Eigenkapitals berücksichtigt. Diese erfolgen für die gewerbliche Finanzierung quartalsweise und für das Beteiligungsgeschäft jährlich.

### Überleitung Konzernabschluss

Die Überleitung Konzernabschluss beinhaltet Zentral gesteuerte Portfolioaktivitäten, SRE und verschiedene Posten, die nicht den einzelnen Sektoren und Sektorübergreifenden Geschäften zugeordnet werden, da sie nach Ansicht des Vorstands nicht die Leistung der Sektoren und Sektorübergreifenden Geschäfte widerspiegeln. Für das Geschäftsjahr 2010 hat der Vorstand eine unter den Zentralen Posten enthaltene Sondervergütung an Mitarbeiter genehmigt, die im Geschäftsjahr 2011 überwiegend auf die Sektoren verteilt werden wird.

Siemens hat die Bereinigung der Sonstigen operativen Aktivitäten im Geschäftsjahr 2009 abgeschlossen. Seit dem Geschäftsjahr 2010 enthalten die Segmentinformationen eine neue Position für zentral gesteuerte Aktivitäten, die veräußert oder eingestellt werden sollen. Diese beinhalten derzeit im Wesentlichen Electronics Assembly Systems sowie Restaktivitäten aus der Veräußerung der ehemaligen Com-Aktivitäten. Die Ergebnisse der neuen Position, Zentral gesteuerte Portfolioaktivitäten, sind rückwirkend vergleichbar ausgewiesen.

### Zentral gesteuerte Portfolioaktivitäten

Die Zentral gesteuerten Portfolioaktivitäten wiesen im Geschäftsjahr 2010 einen Verlust von 139 Mio. EUR aus, gegenüber einem Verlust von 371 Mio. EUR im Vorjahr. Innerhalb dieser Verbesserung verringerte sich der Verlust in Verbindung mit Electronics Assembly Systems im Geschäftsjahr 2010 auf 141 Mio. EUR, einschließlich eines Betrags in Höhe von 106 Mio. EUR, der in Zusammenhang mit einem erwarteten Verlust aus dem angekündigten Verkauf an ASM Pacific Technology zurückgestellt wurde. Zum Vergleich: Die Vorjahresperiode enthielt einen höheren Verlust in Verbindung mit Electronics Assembly Systems, der in erster Linie 201 Mio. EUR aus operativen Verlusten und Aufwendungen für Wertminderungen und Maßnahmen zur Personalanpassung in Zusammenhang mit dem Geschäft beinhaltete. Zudem enthielt das Geschäftsjahr 2009 einen Verlust in Verbindung mit der Veräußerung einer Industriefertigungseinheit in Österreich sowie höhere Nettoaufwendungen in Zusammenhang mit veräußerten Geschäften. Der Umsatz bei den Zentral gesteuerten Portfolioaktivitäten fiel trotz eines höheren Umsatzes im Electronics-Assembly-Systems-Geschäft von 503 Mio. EUR im Vorjahr auf 345 Mio. EUR – eine Entwicklung, die in erster Linie auf Portfoliovereinigungen zurückzuführen ist.

### Siemens Real Estate

Das Ergebnis vor Ertragsteuern von SRE belief sich im Geschäftsjahr 2010 auf 250 Mio. EUR und lag damit unter dem Vorjahreswert von 341 Mio. EUR. Dies war zum Teil auf ein geringeres Ergebnis in Zusammenhang mit Immobilienverkäufen zurückzuführen. Zum Vergleich: Das Geschäftsjahr 2009 enthielt einen Ertrag in Höhe von 224 Mio. EUR aus dem Verkauf des Siemens-Wohnungsbestands. Beide Berichtsperioden enthielten Aufwendungen, einschließlich Wertminderungen, in Verbindung mit dem Programm zur Bündelung der Immobilienaktivitäten von Siemens bei SRE und der Implementierung weiterer Effizienzsteigerungsmaßnahmen. Im Geschäftsjahr 2010 beliefen sich diese Aufwendungen auf insgesamt 75 Mio. EUR und lagen damit über dem Vorjahreswert. Im Geschäftsjahr 2010 wurden im Rahmen des Programms zur Bündelung der Immobilienaktivitäten Vermögenswerte mit einem Buchwert von 872 Mio. EUR auf SRE übertragen. SRE erwartet auch für die kommenden Quartale weitere Kosten in Verbindung mit dem Programm. Außerdem plant SRE, abhängig vom Marktumfeld, weitere Immobilien zu veräußern.

### Zentrale Posten und Pensionen

Das Ergebnis der Zentralen Posten und Pensionen betrug im Geschäftsjahr 2010 minus 1,479 Mrd. EUR, gegenüber minus 1,715 Mrd. EUR im Vorjahr.

Die Zentralen Posten verbesserten sich dabei von minus 1,343 Mrd. EUR auf minus 1,292 Mrd. EUR. Im Geschäftsjahr 2010 enthielten die Zentralen Posten höhere Erträge in Verbindung mit Compliance-bezogenen Themen, einschließlich eines Ertrags in Höhe von 84 Mio. EUR aus der Einigung mit den D&O-Versicherern, eines Nettoertrags in Zusammenhang mit der Einigung mit ehemaligen Vorstands- und Aufsichtsratsmitgliedern von Siemens sowie Erträgen in Höhe von 40 Mio. EUR aus der Rückführung durch Behörden arrestierter Beträge. Darüber hinaus enthielt das aktuelle Geschäftsjahr im Vorjahresvergleich höhere personalbezogene Aufwendungen, einschließlich Aufwendungen von 310 Mio. EUR für eine Sondervergütung an Mitarbeiter, die nicht dem oberen Management angehören. Nachdem die Aufteilung dieser Sondervergütung im ersten Quartal des Geschäftsjahrs 2011 ermittelt worden ist, werden die Aufwendungen im Geschäftsjahr 2011 überwiegend auf die Sektoren verteilt. Das Geschäftsjahr 2010 enthielt zudem höhere Aufwendungen für Maßnahmen zur Senkung der IT-Kosten von Siemens sowie Ergebnisbelastungen in Höhe von 61 Mio. EUR in Verbindung mit der strategischen Neuausrichtung von Siemens IT Solutions and Services, in erster Linie für Aufwendungen in Zusammenhang mit der Ausgliederung. Darüber hinaus enthielt das aktuelle Geschäftsjahr Nettoaufwendungen in Zusammenhang mit rechtlichen und regulatorischen Themen sowie einen Ertrag in Höhe von 35 Mio. EUR aus der Veräußerung unserer Roke Manor-Aktivitäten in Großbritannien. Außerdem enthielt das Geschäftsjahr 2010 einen Nettoverlust in Höhe von 13 Mio. EUR in Zusammenhang mit einer wesentlichen Rückbauverpflichtung, im Vergleich zu einem höherem Nettoverlust im Vorjahr. Dabei beinhalteten beide Geschäftsjahre negative zinsbezogene Effekte aus der Bewertung dieser Verpflichtung sowie positive Effekte aus zugehörigen Sicherungsgeschäften, die nicht die Voraussetzungen für die Bilanzierung einer Sicherungsbeziehung erfüllen. Darüber hinaus beinhaltete das Nettoergebnis in Zusammenhang mit dieser Rückbauverpflichtung im Geschäftsjahr 2010 einen Ertrag in Höhe von 60 Mio. EUR infolge überarbeiteter Annahmen (für weitere Informationen verweisen wir auf den »Anhang zum Konzernabschluss«).

Zum Vergleich: Die Zentralen Posten im Geschäftsjahr 2009 enthielten Nettoaufwendungen in Höhe von 235 Mio. EUR in Verbindung mit dem globalen Programm zur Senkung unserer Vertriebs- und allgemeinen Verwaltungskosten und anderen personalbezogenen Restrukturierungsmaßnahmen. Aufwendungen für externe Berater, die wir in Zusammenhang mit den Untersuchungen von mutmaßlichen Verstößen gegen Antikorruptionsgesetze und von ähnlichen Angelegenheiten sowie mit Maßnahmen zur Beseitigung von Schwächen des internen Kontrollsystems beauftragt hatten, beliefen sich im Geschäftsjahr 2009 auf 95 Mio. EUR. Darüber hinaus enthielt die Vorjahresperiode einen positiven Effekt aus der Umstellung eines Jubiläumsprogramms für Mitarbeiter von Barzahlung auf aktienbasierte Vergütung, der von Aufwendungen in Höhe von 53 Mio. EUR in Zusammenhang mit einer globalen Vergleichsvereinbarung mit der Weltbankgruppe ausgeglichen wurde.

Die zentral getragenen Pensionsaufwendungen betragen 188 Mio. EUR im Geschäftsjahr 2010, im Vergleich zu 372 Mio. EUR im Vorjahr. Die Veränderung im Vorjahresvergleich resultierte aus einer höheren erwarteten Rendite des Fondsvermögens und einem niedrigeren Zinsaufwand in der abgelaufenen Berichtsperiode sowie höheren Aufwendungen für Versicherungsbeiträge in Zusammenhang mit unserer Pflichtmitgliedschaft im deutschen Pensionssicherungsverein (PSV) im Vorjahreszeitraum.

Mit Beginn des Geschäftsjahrs 2011 werden zentrale Infrastrukturkosten, die derzeit in den Zentralen Posten erfasst werden, primär auf die Sektoren umgegliedert. Finanzinformationen für Vorperioden werden auf vergleichbarer Basis dargestellt. So werden die vergleichbaren Werte für das Geschäftsjahr 2010 beispielsweise eine Zuordnung zentraler Infrastrukturkosten von 585 Mio. EUR ausweisen.

Zentral gesteuerte Aktivitäten in Zusammenhang mit der Aufstellung von Siemens IT Solutions and Services als rechtlich separates, 100%iges Tochterunternehmen von Siemens werden voraussichtlich zu wesentlichen Ergebnisbelastungen in den kommenden Quartalen führen.

### **Konsolidierungen, Konzern-Treasury und sonstige Überleitungspositionen**

Das Ergebnis vor Ertragsteuern von Konsolidierungen, Konzern-Treasury und sonstigen Überleitungspositionen belief sich im aktuellen Geschäftsjahr auf minus 328 Mio. EUR, gegenüber minus 373 Mio. EUR im Vorjahr. Das Geschäftsjahr 2010 profitierte dabei von einem Rückgang der Refinanzierungskosten aufgrund niedriger Zinssätze, der zum Teil durch Veränderungen der Marktwerte von Zinsderivaten kompensiert wurde.

## ÜBERLEITUNG AUF ANGEPASTES EBITDA (fortgeführte Aktivitäten)

Die folgende Tabelle gibt zusätzliche Informationen zu Posten, die im Ergebnis und im Ergebnis vor Ertragsteuern wirken, und leitet auf das angepasste EBITDA über. Wir berichten angepasstes EBIT und angepasstes EBITDA als Erfolgsmessgrößen. Die vergleichbare IFRS-Kennzahl ist der in der Konzern-Gewinn- und Verlustrechnung berichtete Gewinn (nach Steuern). Weitere Informationen zum angepassten EBIT und angepassten EBITDA finden Sie am Ende dieses Zusammengefassten Lageberichts.

Geschäftsjahresende 30. September 2010 und 2009

| (in Mio. EUR)                                                          | Ergebnis <sup>1</sup> |                | Ergebnis aus<br>nach der Equity-<br>Methode bilanzierten<br>Beteiligungen <sup>2</sup> |                |
|------------------------------------------------------------------------|-----------------------|----------------|----------------------------------------------------------------------------------------|----------------|
|                                                                        | 2010                  | 2009           | 2010                                                                                   | 2009           |
| <b>Sektoren und Divisionen</b>                                         |                       |                |                                                                                        |                |
| <b>Sektor Industry</b>                                                 | <b>3.478</b>          | <b>2.701</b>   | <b>5</b>                                                                               | <b>1</b>       |
| Industry Automation                                                    | 1.048                 | 681            | - 2                                                                                    | - 2            |
| Drive Technologies                                                     | 855                   | 836            | - 1                                                                                    | - 2            |
| Building Technologies                                                  | 456                   | 340            | 7                                                                                      | 4              |
| OSRAM                                                                  | 569                   | 89             | - 8                                                                                    | - 2            |
| Industry Solutions                                                     | 39                    | 360            | 4                                                                                      | 4              |
| Mobility                                                               | 513                   | 390            | 5                                                                                      | - 1            |
| <b>Sektor Energy</b>                                                   | <b>3.562</b>          | <b>3.315</b>   | <b>78</b>                                                                              | <b>59</b>      |
| Fossil Power Generation                                                | 1.516                 | 1.275          | 27                                                                                     | 26             |
| Renewable Energy                                                       | 368                   | 382            | 9                                                                                      | 4              |
| Oil & Gas                                                              | 487                   | 499            | -                                                                                      | -              |
| Power Transmission                                                     | 763                   | 725            | 36                                                                                     | 27             |
| Power Distribution                                                     | 422                   | 435            | 6                                                                                      | 2              |
| <b>Sektor Healthcare</b>                                               | <b>748</b>            | <b>1.450</b>   | <b>3</b>                                                                               | <b>29</b>      |
| Imaging & IT                                                           | 1.452                 | 1.161          | 7                                                                                      | 8              |
| Workflow & Solutions                                                   | 27                    | - 53           | -                                                                                      | 10             |
| Diagnostics                                                            | - 776                 | 338            | - 9                                                                                    | -              |
| <b>Summe Sektoren</b>                                                  | <b>7.789</b>          | <b>7.466</b>   | <b>86</b>                                                                              | <b>89</b>      |
| <b>Equity Investments</b>                                              | <b>- 191</b>          | <b>- 1.851</b> | <b>- 248</b>                                                                           | <b>- 2.160</b> |
| <b>Sektorübergreifende Geschäfte</b>                                   |                       |                |                                                                                        |                |
| <b>Siemens IT Solutions and Services</b>                               | <b>- 537</b>          | <b>90</b>      | <b>20</b>                                                                              | <b>26</b>      |
| <b>Siemens Financial Services (SFS)</b>                                | <b>447</b>            | <b>304</b>     | <b>83</b>                                                                              | <b>130</b>     |
| <b>Überleitung Konzernabschluss</b>                                    |                       |                |                                                                                        |                |
| Zentral gesteuerte Portfolioaktivitäten                                | - 139                 | - 371          | -                                                                                      | -              |
| Siemens Real Estate (SRE)                                              | 250                   | 341            | -                                                                                      | -              |
| Zentrale Posten und Pensionen                                          | - 1.479               | - 1.715        | -                                                                                      | - 4            |
| Konsolidierungen, Konzern-Treasury und sonstige Überleitungspositionen | - 328                 | - 373          | 20                                                                                     | - 27           |
| <b>Siemens</b>                                                         | <b>5.811</b>          | <b>3.891</b>   | <b>- 40</b>                                                                            | <b>- 1.946</b> |

- 1 Das Ergebnis der Sektoren und Divisionen sowie von Equity Investments, Siemens IT Solutions and Services und der Zentral gesteuerten Portfolioaktivitäten ist das Ergebnis vor Finanzierungszinsen, bestimmten Pensionsaufwendungen und Ertragsteuern. Darüber hinaus werden dem Ergebnis verschiedene Sachverhalte nicht zugerechnet, die das Management als nicht indikativ für die Erfolgsbeurteilung erachtet. Das Ergebnis von SFS und SRE ist das Ergebnis vor Ertragsteuern. Das Ergebnis von Siemens ist das Ergebnis aus fortgeführten Aktivitäten vor Ertragsteuern. Eine Überleitung des Ergebnisses aus fortgeführten Aktivitäten vor Ertragsteuern zum Ergebnis (nach Steuern) findet sich in der Konzern-Gewinn- und Verlustrechnung.
- 2 Enthält Wertminderungen und Wertaufholungen auf nach der Equity-Methode bilanzierte Beteiligungen.
- 3 Enthält Wertminderungen auf langfristige zur Veräußerung verfügbare finanzielle Vermögenswerte. Für Siemens setzt sich das Finanzergebnis aus den in der Konzern-Gewinn- und Verlustrechnung berichteten Positionen Zinsertrag, Zinsaufwand und Sonstiges Finanzergebnis zusammen.

| Finanzergebnis <sup>3</sup> |       | Angepasstes EBIT <sup>4</sup> |         | Abschreibungen und Wertminderungen auf Immaterielle Vermögenswerte <sup>5</sup> |      | Abschreibungen und Wertminderungen auf Sachanlagen und Geschäfts- und Firmenwerte <sup>6</sup> |       | Angepasstes EBITDA |         |
|-----------------------------|-------|-------------------------------|---------|---------------------------------------------------------------------------------|------|------------------------------------------------------------------------------------------------|-------|--------------------|---------|
| 2010                        | 2009  | 2010                          | 2009    | 2010                                                                            | 2009 | 2010                                                                                           | 2009  | 2010               | 2009    |
|                             |       |                               |         |                                                                                 |      |                                                                                                |       |                    |         |
| - 14                        | - 13  | 3.488                         | 2.713   | 364                                                                             | 376  | 658                                                                                            | 715   | 4.510              | 3.804   |
| 3                           | - 3   | 1.048                         | 686     | 183                                                                             | 188  | 94                                                                                             | 98    | 1.326              | 972     |
| - 1                         | - 1   | 856                           | 839     | 45                                                                              | 44   | 148                                                                                            | 150   | 1.049              | 1.033   |
| 1                           | 1     | 448                           | 335     | 77                                                                              | 75   | 91                                                                                             | 104   | 616                | 514     |
| -                           | 1     | 578                           | 90      | 18                                                                              | 26   | 220                                                                                            | 243   | 816                | 359     |
| - 3                         | 3     | 38                            | 353     | 25                                                                              | 33   | 59                                                                                             | 64    | 123                | 450     |
| - 13                        | - 16  | 521                           | 407     | 15                                                                              | 10   | 47                                                                                             | 56    | 583                | 473     |
| - 22                        | - 10  | 3.506                         | 3.266   | 93                                                                              | 70   | 353                                                                                            | 315   | 3.953              | 3.651   |
| - 14                        | - 14  | 1.502                         | 1.263   | 16                                                                              | 16   | 123                                                                                            | 107   | 1.641              | 1.386   |
| - 3                         | - 1   | 362                           | 379     | 29                                                                              | 7    | 57                                                                                             | 45    | 448                | 431     |
| - 2                         | -     | 490                           | 499     | 26                                                                              | 26   | 58                                                                                             | 58    | 573                | 583     |
| -                           | 9     | 727                           | 689     | 11                                                                              | 11   | 77                                                                                             | 66    | 815                | 766     |
| - 2                         | - 3   | 418                           | 436     | 11                                                                              | 10   | 33                                                                                             | 33    | 462                | 479     |
| 20                          | 6     | 725                           | 1.415   | 317                                                                             | 304  | 1.538                                                                                          | 350   | 2.579              | 2.069   |
| 2                           | 2     | 1.444                         | 1.151   | 109                                                                             | 116  | 81                                                                                             | 86    | 1.635              | 1.353   |
| 2                           | 1     | 25                            | - 64    | 6                                                                               | 6    | 28                                                                                             | 24    | 59                 | - 34    |
| 7                           | 8     | - 774                         | 330     | 200                                                                             | 181  | 1.422                                                                                          | 233   | 848                | 744     |
| - 16                        | - 17  | 7.719                         | 7.394   | 774                                                                             | 750  | 2.549                                                                                          | 1.380 | 11.042             | 9.524   |
| 35                          | 30    | 22                            | 279     | -                                                                               | -    | -                                                                                              | -     | 22                 | 279     |
|                             |       |                               |         |                                                                                 |      |                                                                                                |       |                    |         |
| - 1                         | 1     | - 557                         | 63      | 49                                                                              | 44   | 92                                                                                             | 136   | - 415              | 243     |
| 315                         | 111   | 49                            | 63      | 7                                                                               | 6    | 326                                                                                            | 314   | 383                | 383     |
|                             |       |                               |         |                                                                                 |      |                                                                                                |       |                    |         |
| 3                           | -     | - 143                         | - 371   | 1                                                                               | 2    | 6                                                                                              | 44    | - 135              | - 325   |
| - 47                        | - 35  | 298                           | 376     | 2                                                                               | 1    | 294                                                                                            | 180   | 594                | 557     |
| - 158                       | - 394 | - 1.321                       | - 1.317 | 24                                                                              | 31   | 51                                                                                             | 54    | - 1.246            | - 1.232 |
| - 196                       | - 206 | - 151                         | - 140   | -                                                                               | -    | - 59                                                                                           | - 70  | - 210              | - 210   |
| - 65                        | - 510 | 5.916                         | 6.347   | 858                                                                             | 834  | 3.260                                                                                          | 2.038 | 10.034             | 9.219   |

4 Das angepasste EBIT ergibt sich aus dem Ergebnis aus fortgeführten Aktivitäten, abzüglich Finanzergebnis und Ergebnis aus nach der Equity-Methode bilanzierten Beteiligungen.

5 Abschreibungen und Wertminderungen auf Immaterielle Vermögenswerte nach Abzug von Wertaufholungen außer Geschäfts- und Firmenwerte.

6 Abschreibungen und Wertminderungen auf Sachanlagen nach Abzug von Wertaufholungen. Enthält Wertminderungen auf Geschäfts- und Firmenwerte für das Geschäftsjahr 2010 in Höhe von 1.145 (im Vj. 32) EUR.

Aufgrund von Rundungen ist es möglich, dass sich einzelne Zahlen nicht zur angegebenen Summe aufaddieren.



## DIVIDENDE

Der Vorstand wird in der Hauptversammlung am 25. Januar 2011 mit Zustimmung des Aufsichtsrats vorschlagen, den Bilanzgewinn der Siemens Aktiengesellschaft aus dem abgelaufenen Geschäftsjahr 2010 wie folgt zu verwenden: Ausschüttung einer Dividende von 2,70 EUR je für das abgelaufene Geschäftsjahr 2010 zum Zeitpunkt der Hauptversammlung dividendenberechtigte Stückaktie und Gewinnvortrag des verbleibenden Differenzbetrags. Im Geschäftsjahr 2009 war eine Dividende von 1,60 EUR je dividendenberechtigte Stückaktie ausgeschüttet worden.

## SCHÄTZ- UND PRÄMISSSENSITIVE BILANZIERUNGSGRUNDSÄTZE

Siemens erstellt den Konzernabschluss im Einklang mit den International Financial Reporting Standards (IFRS), wie sie vom International Accounting Standards Board (IASB) herausgegeben wurden und in der EU anzuwenden sind. Die Kenntnis der Grundlagen des Konzernabschlusses, wie im »Anhang zum Konzernabschluss« dargestellt, ist erforderlich, um unsere Darstellung der Vermögens-, Finanz- und Ertragslage zu verstehen. In bestimmten Fällen ist es notwendig, schätz- und prämissensensitive Bilanzierungsgrundsätze anzuwenden. Diese beinhalten komplexe und subjektive Bewertungen sowie Schätzungen, die auf Sachverhalten beruhen, die von Natur aus ungewiss sind und Veränderungen unterliegen können. Schätz- und prämissensensitive Bilanzierungsgrundsätze können sich im Zeitablauf verändern und die Darstellung der Vermögens-, Finanz- und Ertragslage der Gesellschaft erheblich beeinflussen. Außerdem können sie Annahmen enthalten, die die Unternehmensleitung in derselben Berichtsperiode aus gleichermaßen vernünftigen Gründen auch anders hätte treffen können. Die Unternehmensleitung weist darauf hin, dass künftige Ereignisse häufig von Prognosen abweichen und Schätzungen routinemäßige Anpassungen erfordern.

Informationen zu Schätz- und prämissensensitiven Bilanzierungsgrundsätzen finden sich im »Anhang zum Konzernabschluss«. Bezüglich einer Sensitivitätsanalyse zur Wertminderung des Geschäfts- und Firmenwerts der Division Diagnostics des Sektors Healthcare siehe »Vermögenslage – Wertminderung des Geschäfts- und Firmenwerts bei der Division Diagnostics im Sektor Healthcare«.

## Finanzlage

### GRUNDSÄTZE UND ZIELE DES FINANZMANAGEMENTS

Siemens ist einem starken Finanzprofil verpflichtet, das die finanzielle Flexibilität bietet, unsere Wachstums- und Portfoliooptimierungsziele weitgehend unabhängig von Marktbedingungen zu erreichen.

Das Finanzmanagement von Siemens wird im Rahmen der maßgeblichen Gesetze und der internen Grundsätze und Regeln ausgeübt. Es beinhaltet die folgenden Aktivitäten:

#### Liquiditätsmanagement

Die wichtigste Quelle der Finanzierung sind die Mittelzuflüsse aus laufender Geschäftstätigkeit. Grundsätzlich steuert die Konzern-Treasury die Bestände an Zahlungsmitteln und Zahlungsmitteläquivalenten sowie die Finanzmittelbeschaffung durch verschiedene Fremdkapitalinstrumente zentral für den Konzern, sofern diesem Grundsatz keine Einschränkungen des Kapitalverkehrs in einzelnen Ländern entgegenstehen. In diesen Ländern finanzieren sich die betroffenen Tochterunternehmen vor allem im lokalen Bankenmarkt. Siemens folgt einer bedachten Finanzierungs politik, die auf ein ausgewogenes Finanzierungsportfolio, ein diversifiziertes Fälligkeitsprofil und ein komfortables Liquiditätspolster ausgerichtet ist. Zum 30. September 2010 hatte Siemens 14,108 Mrd. EUR an Zahlungsmitteln und Zahlungsmitteläquivalenten vorwiegend in Euro, von denen 99% von der Konzern-Treasury verwaltet wurden. Insbesondere in Zusammenhang mit der globalen Finanzmarktkrise verfolgt Siemens kontinuierlich die sich an den Finanzmärkten bietenden Finanzierungsmöglichkeiten sowie Trends hinsichtlich der Verfügbarkeit von Finanzmitteln und deren Finanzierungskosten, um mögliche Strategien für unser Finanz- und Risikoprofil zu bewerten.

Die Konzern-Treasury hat mit Finanzinstituten, die mit einem »Investment-Grade« beurteilt wurden, Rückkaufvereinbarungen (*Reverse Repurchase Agreement*) abgeschlossen. Siemens hält Wertpapiere als Sicherheit für diese Vereinbarungen, die von einem Dritten (Euroclear) verwaltet werden. Siemens ist berechtigt, diese Wertpapiere zu veräußern oder zu verpfänden. Das Ausmaß, in dem Siemens diese Rückkaufvereinbarungen abschließt, hängt von den Erfordernissen des Liquiditätsmanagements und von der Verfügbarkeit der Zahlungsmittel und Zahlungsmitteläquivalente ab und kann variieren. Für weitere Informationen siehe »Anhang zum Konzernabschluss«.

## Zahlungsmittelmanagement

Das Zahlungsmittelmanagement beinhaltet das weltweite Management der Beziehungen zu unseren Bankpartnern und der Bankkonten sowie den Zahlungsverkehr einschließlich der Verwaltung von Zahlungsmittelpools. Siemens strebt danach, die Effizienz und Transparenz durch einen hohen Standardisierungsgrad und durch eine kontinuierliche Verbesserung der Zahlungsprozesse zu erhöhen. Der innerbetriebliche und externe Zahlungsverkehr wird, sofern zulässig, mittels konzernweiter Systeme und mit zentralen Kontrollen durchgeführt, um die Einhaltung der internen und externen Richtlinien und Anforderungen sicherzustellen. Um ein effizientes Management der Finanzmittel von Siemens zu gewährleisten, verfolgt die Konzern-Treasury einen zentralen Zahlungsmittelmanagementansatz: Im Rahmen der gesetzlichen und wirtschaftlichen Möglichkeiten werden Finanzmittel zusammengeführt und zentral von der Konzern-Treasury gesteuert. Umgekehrt wird der Finanzierungsbedarf innerhalb des Konzerns zentral durch die Konzern-Treasury über konzerninterne Verrechnungskonten und/oder Darlehen bedient.

## Management der finanziellen Risiken

Anlagen von Zahlungsmitteln und Zahlungsmitteläquivalenten unterliegen Kreditwürdigkeitsanforderungen und Kontrahentenlimiten. Die Konzern-Treasury führt Zins-, Währungs- und bestimmte Rohstoffrisiken von Siemens zusammen und steuert diese zentral. Um diese zusammengefassten Risiken abzusichern, werden derivative Finanzinstrumente mit externen Finanzinstituten eingesetzt. Für detailliertere Informationen zum Management der finanziellen Risiken siehe »Anhang zum Konzernabschluss«.

## Management der Finanzierung der Pensionspläne

Entscheidungen über Mittelzuführungen zum Fondsvermögen sind Teil der konservativen Finanzpolitik des Unternehmens, die ebenso eine permanente Analyse der Struktur unserer Pensionsverpflichtungen umfasst. Für weitere Informationen über die Finanzierung der Pensionspläne siehe »– Finanzierung der Pensionspläne«.

## Kapitalstrukturmanagement und Kreditrating

Um die Kapitalstruktur effizient zu steuern, ist es für Siemens wichtig, sowohl den weiterhin uneingeschränkten Kapitalmarktzugang zu verschiedenen Fremdfinanzierungsmitteln als auch die Bedienung der Finanzschulden sicherzustellen. Für weitere Informationen über die Siemens-Kapitalstruktur siehe folgend »– Kapitalstruktur«.

Zur Wahrung eines starken Finanzprofils trägt insbesondere unser Kreditrating bei, das neben anderen Faktoren durch die Kapitalstruktur, die Profitabilität, die Fähigkeit der Generierung von Zahlungsmittelzuflüssen, die Diversifikation bezüglich Produkten und Regionen sowie durch unsere Wettbewerbsposition beeinflusst wird. Die folgende Tabelle zeigt unser derzeitiges Kreditrating von den Ratingagenturen Moody's Investors Service und Standard & Poor's:

|                             | Moody's Investors Service | Standard & Poor's |
|-----------------------------|---------------------------|-------------------|
| Langfristige Finanzschulden | A1                        | A+                |
| Kurzfristige Finanzschulden | P-1                       | A-1               |

Im Geschäftsjahr 2010 hat Moody's Investors Service keine Änderung beim Siemens-Rating vorgenommen. Am 9. November 2007 bewertete Moody's unser langfristiges Kreditrating mit »A1« mit dem Ausblick »stable«. Die Klassifikation von »A« entspricht der dritthöchsten Kreditqualität innerhalb der Ratingkategorien von Moody's. Der numerische Zusatz »1« bedeutet, dass das langfristige Kreditrating von Siemens im oberen Bereich der Kategorie »A« liegt. Der Ratingausblick von Moody's bezeichnet eine Einschätzung hinsichtlich der wahrscheinlichen mittelfristigen Entwicklung des Kreditratings eines Emittenten. Ein Ratingausblick von Moody's fällt in eine der folgenden sechs Kategorien: »positive«, »negative«, »stable«, »developing«, »ratings under review« und »no outlook«.

Das Rating unserer kurzfristigen Kredite und kurzfristigen Schuldverschreibungen wird von Moody's Investors Service mit »P-1« bewertet. Dies ist die höchstmögliche Bewertung innerhalb des Prime-Rating-Systems von Moody's, das die Fähigkeit eines Emittenten zur Bedienung seiner vorrangigen unbesicherten Finanzverbindlichkeiten mit einer ursprünglichen Restlaufzeit von weniger als einem Jahr abschätzt.

Ferner veröffentlicht Moody's Investors Service die Bewertung unserer Liquiditätsrisiken im Rahmen von »credit opinions«. Unser Liquiditätsprofil wird in der jüngsten Bewertung von Moody's vom 3. Juni 2010 als »sehr gesund« (»very healthy«) bewertet.

Während des Geschäftsjahrs 2010 hat Standard & Poor's das Rating unverändert gelassen. Am 5. Juni 2009 hat Standard & Poor's unser langfristiges Kreditrating mit »A+«, Ausblick »stable« bewertet. Die Klassifikation von »A« entspricht der dritthöchsten Kreditqualität innerhalb der Ratingkategorien von Standard & Poor's. Der Zusatz »+« bedeutet, dass unser langfristiges Kreditrating im oberen Bereich der Kategorie »A« liegt. Der Ratingausblick von Standard & Poor's gibt die Einschätzung hinsichtlich der wahrscheinlichen mittelfristigen Entwicklung des langfristigen Kreditratings wieder. Bezüglich des Ausblicks bei Standard & Poor's existieren vier Kategorien: »positive«, »negative«, »stable« und »developing«. Darüber hinaus hat Standard & Poor's am 5. Juni 2009 unser kurzfristiges Kreditrating mit »A-1« bewertet. Diese Klassifikation entspricht dem zweithöchsten kurzfristigen Kreditrating innerhalb der Ratingkategorien von Standard & Poor's.

Die US-Börsenaufsichtsbehörde (U.S. Securities and Exchange Commission) erlaubte die Registrierung von Moody's Investors Service sowie Standard & Poor's Rating Services als eine national anerkannte statistische Ratingagentur (»Nationally Recognized Statistical Rating Organization«). Siemens hat keine weitere national anerkannte statistische Ratingagentur mit einer Bewertung der lang- und kurzfristigen Kreditqualität beauftragt.

Wir sind der Überzeugung, dass unser von Moody's und Standard & Poor's vergebene hohen Kreditratings für langfristige Finanzschulden es uns ermöglichen, Finanzmittel zu attraktiven Konditionen am Kapitalmarkt aufzunehmen oder flexible Finanzierungen von Banken zu erhalten. Ein hohes Kreditrating führt grundsätzlich zu niedrigeren Kreditrisikoaufschlägen (*Credit Spreads*), und daher wirkt sich unser Kreditrating positiv auf unsere Finanzierungskosten aus. Ratings von Wertpapieren sind keine Empfehlung zum Kauf, Verkauf oder zum Halten dieser Wertpapiere. Kreditratings können jederzeit von den Ratingagenturen geändert oder zurückgezogen werden. Jedes Rating sollte eigenständig und unabhängig von anderen Ratings beurteilt werden.

## KAPITALSTRUKTUR

Unsere Kapitalstruktur zum 30. September 2010 und 2009 war wie folgt:

| (in Mio. EUR)                                           | 30. September |               | Änderung  |
|---------------------------------------------------------|---------------|---------------|-----------|
|                                                         | 2010          | 2009          | in %      |
| <b>Summe Eigenkapital der Aktionäre der Siemens AG</b>  | <b>28.346</b> | <b>26.646</b> | <b>6%</b> |
| Als Prozent vom Gesamtkapital                           | 59%           | 58%           |           |
| Kurzfristige Finanzschulden                             | 2.416         | 698           |           |
| Langfristige Finanzschulden                             | 17.497        | 18.940        |           |
| <b>Summe Finanzschulden</b>                             | <b>19.913</b> | <b>19.638</b> | <b>1%</b> |
| Als Prozent vom Gesamtkapital                           | 41%           | 42%           |           |
| <b>Gesamtkapital (Eigenkapital plus Finanzschulden)</b> | <b>48.259</b> | <b>46.284</b> | <b>4%</b> |

Im Geschäftsjahr 2010 ist das Eigenkapital der Aktionäre der Siemens AG gegenüber dem Vorjahr um 6% gestiegen. Die Summe Finanzschulden stieg während des Geschäftsjahrs 2010 um 1% an. Dies führte im Geschäftsjahr 2010 zu einem Anstieg des Verhältnisses Eigenkapital zu Gesamtkapital auf 59%, gegenüber 58% im Vorjahr. Das Verhältnis Finanzschulden zu Gesamtkapital sank entsprechend von 42% im Geschäftsjahr 2009 auf 41% im Geschäftsjahr 2010. Detailliertere Informationen zu den Veränderungen des Eigenkapitals sowie zur Ausgabe und Rückführung von Finanzschulden finden sich im »Anhang zum Konzernabschluss« sowie in den Kapiteln »Vermögenslage« und »-Finanzausstattung und Kapitalerfordernisse«.

Wir haben Verpflichtungen zur Veräußerung oder sonstigen Ausgabe von Aktien in Zusammenhang mit bestehenden aktienbasierten Vergütungsplänen. Im Geschäftsjahr 2010 wurden die Verpflichtungen aus der aktienbasierten Vergütung durch Rückkauf von eigenen Aktien erfüllt. Siemens wird im Geschäftsjahr 2011 voraussichtlich die aktienbasierten Vergütungspläne ebenfalls durch eigene Aktien erfüllen. Weiterführende Informationen zu aktienbasierter Vergütung und eigenen Aktien finden sich im »Anhang zum Konzernabschluss«.

Im Rahmen des Fit42010-Unternehmensprogramms hat Siemens beschlossen, seine Kapitalstruktur zu optimieren. Für Siemens ist es wichtig, sowohl den breiten Kapitalmarktzugang zu verschiedenen Fremdfinanzierungsmitteln als auch die Bedienung der Finanzschulden sicherzustellen. Daher hat Siemens ein Kapitalstrukturziel festgelegt, das durch das Verhältnis »angepasste industrielle Nettoverschuldung« zu »EBITDA (angepasst)« definiert wird. Die Ermittlung der angepassten industriellen Nettoverschuldung ist in nebenstehender Tabelle aufgeführt. Das EBITDA (angepasst) ist definiert als EBIT (angepasst) vor Abschreibungen (definiert als Abschreibungen und Wertminderungen auf Immaterielle Vermögenswerte – ohne Geschäfts- und Firmenwerte) sowie vor Abschreibungen und Wertminderungen auf Sachanlagen und Geschäfts- und Firmenwerte. EBIT (angepasst) ist der Gewinn/Verlust aus fortgeführten Aktivitäten vor Ertragsteuern abzüglich Zinsertrag, Zinsaufwand und Sonstiges Finanzergebnis sowie abzüglich Ergebnis aus nach der Equity-Methode bilanzierten Beteiligungen. Für weitere Informationen siehe »Überleitung auf EBITDA (angepasst)«.

Die Kapitalstruktur-Zielbandbreite für das Geschäftsjahr 2010 beträgt 0,8 bis 1,0. Diese basiert jedoch auf der Grundlage normaler Konjunkturzyklen vor der Rezession und auf dem durch die negativen Auswirkungen der Finanzkrise geprägten globalen wirtschaftlichen Umfeld. Als ein Instrument der Zielerreichung haben wir unseren angekündigten Aktienrückkaufplan mit einem vorgesehenen Gesamtvolumen von bis zu 10 Mrd. EUR bis zum Jahr 2010 als Programm aufgesetzt. Seit dem Start des Aktienrückkaufprogramms am 28. Januar 2008 wurden im Rahmen dieses Plans in zwei Tranchen 52.771.205 Siemens-Aktien mit einem Marktwert zum Erwerbszeitpunkt von rund 4,0 Mrd. EUR gekauft. Diese Aktien können unter anderem zum Zweck der Einziehung und Kapitalherabsetzung sowie zur Erfüllung von Verpflichtungen aus aktienbasierten Vergütungsprogrammen verwendet werden. Während der Geschäftsjahre 2009 und 2010 wurden keine Aktien unter diesem Programm zurückgekauft.

|                                                                                                  |                                                                        | 30. September |              |
|--------------------------------------------------------------------------------------------------|------------------------------------------------------------------------|---------------|--------------|
| (in Mio. EUR)                                                                                    |                                                                        | 2010          | 2009         |
| Kurzfristige Finanzschulden                                                                      |                                                                        | 2.416         | 698          |
| Plus:                                                                                            | Langfristige Finanzschulden <sup>1</sup>                               | 17.497        | 18.940       |
| Minus:                                                                                           | Zahlungsmittel und Zahlungsmitteläquivalente                           | - 14.108      | - 10.159     |
| Minus:                                                                                           | Kurzfristige Zur Veräußerung verfügbare finanzielle Vermögenswerte     | - 246         | - 170        |
| <b>Nettoverschuldung</b>                                                                         |                                                                        | <b>5.560</b>  | <b>9.309</b> |
| Minus:                                                                                           | SFS-Finanzschulden                                                     | - 10.028      | - 9.521      |
| Plus:                                                                                            | Finanzierungsstatus wesentlicher Pensionszusagen                       | 6.357         | 4.015        |
| Plus:                                                                                            | Finanzierungsstatus wesentlicher pensionsähnlicher Verpflichtungen     | 738           | 646          |
| Plus:                                                                                            | Kreditgarantien                                                        | 597           | 313          |
| Minus:                                                                                           | ca. 50 % des Nominalbetrags der Hybridschuldverschreibung <sup>2</sup> | - 886         | - 862        |
| Minus:                                                                                           | Effekte aus der Bilanzierung von Fair Value Hedges <sup>3</sup>        | - 1.518       | - 1.027      |
| <b>Angepasste industrielle Nettoverschuldung</b>                                                 |                                                                        | <b>819</b>    | <b>2.873</b> |
| <b>Angepasstes EBITDA (fortgeführte Aktivitäten)</b>                                             |                                                                        | <b>10.034</b> | <b>9.219</b> |
| <b>Angepasste industrielle Nettoverschuldung / angepasstes EBITDA (fortgeführte Aktivitäten)</b> |                                                                        | <b>0,08</b>   | <b>0,31</b>  |

- Langfristige Finanzschulden beinhalten Effekte aus der Bilanzierung von Fair Value Hedges in Höhe von 1.518 Mio. EUR für das Geschäftsjahr 2010 (im Vj. 1.027 Mio. EUR).
- Die Korrektur betreffend unserer Hybridschuldverschreibung berücksichtigt die von Ratingagenturen angewandte Berechnung dieser Finanzkennzahl, nach der 50 % unserer Hybridschuldverschreibung als Eigenkapital und 50 % als Fremdkapital klassifiziert werden. Diese Zuordnung folgt den Besonderheiten unserer Hybridschuldverschreibung wie lange Laufzeiten und Nachrangigkeit zu allen erstrangigen Anleihen und Verschuldungsverpflichtungen.
- Grundsätzlich werden Finanzschulden zu einem Wert ausgewiesen, der annähernd dem Rückzahlungsbetrag entspricht. Für Finanzschulden, die in einer Sicherungsbeziehung stehen (Fair Value Hedges), wird dieser Wert jedoch hauptsächlich um zinsinduzierte Marktwertänderungen angepasst. Wir ziehen daher diese Marktwertänderungen ab, um auf einen Wert zu kommen, der annähernd dem Rückzahlungsbetrag der Finanzschulden entspricht. Wir sind der Überzeugung, dass dieser Wert aussagekräftiger für die oben dargestellte Berechnung ist. Für weiterführende Informationen zu Fair Value Hedges siehe unseren »Anhang zum Konzernabschluss«.

## KAPITALFLUSSRECHNUNG – GESCHÄFTSJAHRE 2010 UND 2009 IM VERGLEICH

In den folgenden Erläuterungen werden unsere Mittelzuflüsse und Mittelabflüsse in den Geschäftsjahren 2010 und 2009 sowohl für fortgeführte als auch für nicht fortgeführte Aktivitäten analysiert.

Wir berichten Free Cash Flow als eine ergänzende Liquiditätskennziffer, definiert als *Mittelzufluss/-abfluss aus laufender Geschäftstätigkeit*, abzüglich der Mittelabflüsse aus *Investitionen in Immaterielle Vermögenswerte und Sachanlagen*. Wir sind der Überzeugung, dass die Darstellung des Free Cash Flow unseren Investoren hilfreiche Informationen bietet, denn diese Kennziffer gibt einen Hinweis auf unsere Fähigkeit, langfristige Mittelzuflüsse aus unserer Geschäftstätigkeit zu erwirtschaften, und auf unsere Fähigkeit, sowohl feststehende als auch nicht feststehende Mittelabflüsse, die nicht in der Kennziffer enthalten sind, wie Auszahlungen für Dividenden, die Bedienung von Schulden oder Akquisitionen, begleichen zu können. Wir verwenden den Free Cash Flow auch für den Vergleich der Zahlungsmittelerwirtschaftung der Segmente. Der Free Cash Flow sollte nicht losgelöst oder als Alternative zu den im Einklang mit IFRS ermittelten Finanzkennzahlen zur Beurteilung von Zahlungsströmen herangezogen werden. Für weitere Informationen zu der Zweckmäßigkeit und Begrenzung dieser Kennziffer siehe vorletzte Seite des Zusammengefassten Lageberichts.

Der Mittelzufluss aus der **laufenden Geschäftstätigkeit** betrug im Geschäftsjahr 2010 9,349 Mrd. EUR, gegenüber Mittelzuflüssen in Höhe von 6,101 Mrd. EUR in der Vorjahresperiode. Beide Werte beinhalten sowohl die fortgeführten als auch die nicht fortgeführten Aktivitäten. Auf fortgeführter Basis belief sich der Mittelzufluss aus der laufenden Geschäftstätigkeit auf 9,447 Mrd. EUR, während im Vorjahreszeitraum der Mittelzufluss 6,246 Mrd. EUR betrug. Im Geschäftsjahr 2010 wurde das Ergebnis der Summe Sektoren durch Aufwendungen aus der Wertminderung in Höhe von 1,204 Mrd. EUR belastet, die in der Division Diagnostics im vierten Quartal des Geschäftsjahrs 2010 gebucht wurden, jedoch keine Auswirkungen auf die Zahlungsmittelzuflüsse hatten. Die Mittelzuflüsse aus der laufenden Geschäftstätigkeit wurden durch einen starken Zuwachs in der operativen Leistung der Sektoren (vorbehaltlich der Aufwendungen aus der Wertminderung), insbesondere in den Sektoren Healthcare und Industry, gestützt. Darüber hinaus profitierte der Mittelzufluss aus der laufenden Geschäftstätigkeit aus positiven Veränderungen beim Nettoumlaufvermögen. Dies beinhaltet deutlich höhere erhaltene Anzahlungen auf noch nicht abgeschlossene Auftragsfertigungsprojekte insbesondere im Sektor Energy, im Vergleich zu einer Reduzierung dieser Zahlungen im Geschäftsjahr 2009. Dagegen buchte der Konzern im Geschäftsjahr 2010 höhere Zahlungen in Zusammenhang mit Ertragsteuern und Pensionsplänen. Beide Berichtsperioden beinhalteten Zahlungen in Höhe von rund 0,8 Mrd. EUR an Aufwendungen für Per-

### Free Cash Flow

| (in Mio. EUR)                                                       |            | Fortgeführte Aktivitäten          |                            | Nicht fortgeführte Aktivitäten    |              | Fortgeführte und nicht fortgeführte Aktivitäten |                            |
|---------------------------------------------------------------------|------------|-----------------------------------|----------------------------|-----------------------------------|--------------|-------------------------------------------------|----------------------------|
|                                                                     |            | Geschäftsjahresende 30. September |                            | Geschäftsjahresende 30. September |              | Geschäftsjahresende 30. September               |                            |
|                                                                     |            | 2010                              | 2009                       | 2010                              | 2009         | 2010                                            | 2009                       |
| Mittelzufluss/-abfluss aus: <sup>1</sup>                            |            |                                   |                            |                                   |              |                                                 |                            |
| <b>Laufender Geschäftstätigkeit</b>                                 | <b>A</b>   | <b>9.447</b>                      | <b>6.246<sup>3</sup></b>   | <b>- 98</b>                       | <b>- 145</b> | <b>9.349</b>                                    | <b>6.101<sup>3</sup></b>   |
| <b>Investitionstätigkeit</b>                                        |            | <b>- 2.768</b>                    | <b>- 2.968<sup>3</sup></b> | <b>- 79</b>                       | <b>- 194</b> | <b>- 2.847</b>                                  | <b>- 3.162<sup>3</sup></b> |
| Darin: Investitionen in Immaterielle Vermögenswerte und Sachanlagen | B          | - 2.336                           | - 2.460 <sup>3</sup>       | -                                 | -            | - 2.336                                         | - 2.460 <sup>3</sup>       |
| <b>Free Cash Flow<sup>1,2</sup></b>                                 | <b>A+B</b> | <b>7.111</b>                      | <b>3.786</b>               | <b>- 98</b>                       | <b>- 145</b> | <b>7.013</b>                                    | <b>3.641</b>               |

<sup>1</sup> Für Informationen zu *Mittelzufluss/-abfluss aus Finanzierungstätigkeit* siehe die unten stehenden Erläuterungen.

<sup>2</sup> Unter den gemäß IFRS ermittelten Kennziffern ist der *Mittelzufluss/-abfluss aus laufender Geschäftstätigkeit* am ehesten mit dem Free Cash Flow vergleichbar. Der *Mittelzufluss/-abfluss aus laufender Geschäftstätigkeit* sowohl aus fortgeführten Aktivitäten als auch aus fortgeführten und nicht fortgeführten Aktivitäten wird in unserer Konzern-Kapitalflussrechnung berichtet. Eine Überleitung der *Investitionen in Immaterielle Vermögenswerte und Sachanlagen aus fortgeführten Aktivitäten* auf die in der »Konzern-Kapitalflussrechnung« gemachten Angaben ist im »Anhang zum Konzernabschluss« zu finden. Andere Unternehmen, die einen Free Cash Flow berichten, können andere Definitionen und Berechnungsmethoden verwenden.

<sup>3</sup> Aufgrund einer Änderung der Rechnungslegungsverlautbarungen wurden, beginnend mit dem Geschäftsjahr 2010, die *Zugänge zu vermieteten Vermögenswerten unter Operating-Leasingverträgen*, die in vorangegangenen Jahren unter den *Investitionen in Immaterielle Vermögenswerte und Sachanlagen* ausgewiesen wurden, rückwirkend vom *Mittelzufluss/-abfluss aus Investitionstätigkeit* in den *Mittelzufluss/-abfluss aus laufender Geschäftstätigkeit* umgliedert. Für weitere Informationen hierzu siehe »Anhang zum Konzernabschluss«.

sonalanpassungsmaßnahmen. Zum Vergleich beinhalteten die negativen Veränderungen des Nettoumlaufvermögens im Geschäftsjahr 2009 Zahlungsausgänge in Höhe von 1,008 Mrd. EUR an US-amerikanische und deutsche Behörden in Verbindung mit der Beilegung von Rechtsstreitigkeiten sowie hohe Zahlungsmittelabflüsse für Belastungen in Zusammenhang mit Projektüberprüfungen in der Division Fossil Power Generation, der Division Mobility und bei Siemens IT Solutions and Services.

Der Mittelabfluss aus nicht fortgeführten Aktivitäten verbesserte sich im Geschäftsjahr 2010 auf 98 Mio. EUR. In der Vorjahresperiode betrug der Mittelabfluss aus nicht fortgeführten Aktivitäten 145 Mio. EUR. Diese Mittelabflüsse stehen vor allem in Zusammenhang mit ehemaligen Com-Aktivitäten.

Der Mittelabfluss aus **Investitionstätigkeit** der fortgeführten und nicht fortgeführten Aktivitäten betrug im Geschäftsjahr 2010 2,847 Mrd. EUR, gegenüber einem Mittelabfluss in Höhe von 3,162 Mrd. EUR in der Vorjahresperiode. Der Mittelabfluss aus Investitionstätigkeit der fortgeführten Aktivitäten belief sich im Geschäftsjahr 2010 auf 2,768 Mrd. EUR und auf 2,968 Mrd. EUR in der Vorjahresperiode. Der *Erwerb von Unternehmen, abzüglich übernommener Zahlungsmittel* in Höhe von 485 Mio. EUR, beinhaltete innerhalb der fortgeführten Aktivitäten Zahlungsausgänge in Höhe von 265 Mio. EUR für die Akquisition des Solarthermie-Unternehmens Solel Solar Systems. Im Vergleich zum Vorjahr führten vorzeitige Beendigungen von Finanzierungsverträgen und ein rückläufiges Neugeschäft bei SFS zu geringeren Mittelabflüssen aus Forderungen aus Finanzdienstleistungen. *Erlöse aus dem Abgang von Finanzanlagen, Immateriellen Vermögenswerten und Sachanlagen* führten zu Mittelzuflüssen in Höhe von 589 Mio. EUR. Hauptsächlich Grund hierfür waren der Verkauf von Grundstücken und Gebäuden bei SRE und der Verkauf unseres 25%-Minderheitsanteil an der Dräger Medical AG & Co. KG an den Mehrheitsaktionär Drägerwerk AG & Co. KGaA. Im Vergleich dazu beinhaltete die Vorjahresperiode 1,221 Mrd. EUR Mittelzuflüsse vor allem aufgrund des Verkaufs des Wohnungsbestands der Siemens Wohnungsgesellschaft mbH & Co. OHG und des Verkaufs des 50%-Anteils an FSC an Fujitsu Limited. Zudem enthielten die Zahlungsausgänge aus *Investitionen in Finanzanlagen* in Höhe von 972 Mio. EUR in der Vorjahresperiode 750 Mio. EUR aus einem von NSN gezogenen Darlehen aus einer Vereinbarung über ein Gesellschafterdarlehen (*Shareholder Loan Agreement*) zwischen Siemens und NSN.

Die nicht fortgeführten Aktivitäten weisen im Geschäftsjahr 2010 einen Mittelabfluss in Höhe von 79 Mio. EUR für Investitionstätigkeiten vor allem für ehemalige Com-Aktivitäten aus. Die Vorjahresperiode verzeichnete in den nicht fortgeführten Aktivitäten einen Mittelabfluss in Höhe von 194 Mio. EUR. Dieser Mittelabfluss in der Vorjahresperiode beinhaltete Zahlungen in Zusammenhang mit dem Verkauf unseres Mobilfunkgeschäfts im Geschäftsjahr 2005, einschließlich einer Zahlung in Höhe von 0,3 Mrd. EUR in Zusammenhang mit einer erfolgten Einigung mit dem Insolvenzverwalter der BenQ Mobile GmbH & Co. OHG sowie Zahlungen für die Einigung bei rechtlichen Themen. In der Vorjahresperiode wurden die Mittelabflüsse aus nicht fortgeführten Aktivitäten jedoch teilweise kompensiert durch Zahlungseingänge aufgrund der Einigung zwischen The Gores Group und Siemens, die sich auf offene Forderungen bezüglich einer Kaufpreisanpassung und weitere beiderseitige Verpflichtungen in Zusammenhang mit dem Verkauf des ehemaligen Geschäfts mit Lösungen für die Unternehmenskommunikation (*Enterprise Networks*) bezogen.

Der **Free Cash Flow** der fortgeführten und nicht fortgeführten Aktivitäten betrug im Geschäftsjahr 2010 plus 7,013 Mrd. EUR, gegenüber plus 3,641 Mrd. EUR in der Vorjahresperiode. Davon entfielen auf den Free Cash Flow der fortgeführten Aktivitäten in der Berichtsperiode plus 7,111 Mrd. EUR, gegenüber plus 3,786 Mrd. EUR in der Vorjahresperiode. Die Veränderung im Vorjahresvergleich ist – wie oben dargestellt – im Wesentlichen auf den Mittelzufluss aus laufender Geschäftstätigkeit zurückzuführen. Die Investitionen in Immaterielle Vermögenswerte und Sachanlagen der fortgeführten Aktivitäten sind aufgrund einer beibehaltenen strikten Kontrolle von Investitionen gegenüber 2,460 Mrd. EUR in der Vorjahresperiode auf 2,336 Mrd. EUR gesunken. Für weitere Informationen zu unseren Investitionen siehe »– Finanzausstattung und Kapitalerfordernisse«. Die Cash Conversion Rate aus fortgeführten Aktivitäten, definiert als Quotient aus dem Free Cash Flow der fortgeführten Aktivitäten und dem Gewinn aus fortgeführten Aktivitäten, lag im Geschäftsjahr 2010 bei 1,73, im Vergleich zu 1,54 in der Vorjahresperiode. Für weitere Informationen zu den Effekten auf unsere Cash Conversion Rate in Zusammenhang mit Wertminderungen bei der Division Diagnostics im Sektor Healthcare im vierten Quartal des Geschäftsjahr 2010, in Zusammenhang mit Belastungen in Verbindung mit der strategischen Neuausrichtung von Siemens IT Solutions and Services im Geschäftsjahr 2010 sowie in Zusammenhang mit Wertminderungen in Verbindung mit NSN im Geschäftsjahr 2009 siehe »Geschäft und Rahmenbedingungen – Finanzielle Steuerungsgrößen«.



Der Free Cash Flow während der Geschäftsjahre 2009 und 2010 stellt sich wie folgt dar:

| Free Cash Flow <sup>1</sup> (in Mio. EUR) |         |
|-------------------------------------------|---------|
| Q4 10                                     | 2.990   |
| Q3 10                                     | 2.145   |
| Q2 10                                     | 1.251   |
| Q1 10                                     | 725     |
| Q4 09                                     | 3.158   |
| Q3 09                                     | 1.064   |
| Q2 09                                     | 1.138   |
| Q1 09 <sup>2</sup>                        | - 1.574 |

1 Fortgeführte Aktivitäten.

2 Free Cash Flow beinhaltet Zahlungen in Höhe von 1.008 Mio. EUR an US-amerikanische und deutsche Behörden im Rahmen der erreichten Einigung bei rechtlichen Themen.

Der Mittelabfluss aus **Finanzierungstätigkeit** der fortgeführten und nicht fortgeführten Aktivitäten lag im Geschäftsjahr 2010 bei 2,646 Mrd. EUR, gegenüber einem Mittelzufluss in Höhe von 375 Mio. EUR im Vorjahreszeitraum. Im Geschäftsjahr 2010 führten hauptsächlich die Rückzahlung von kurzfristigen Schuldverschreibungen (*Commercial Papers*) sowie der Ausgleich von derivativen Finanzinstrumenten, die zur Sicherung von Fremdwährungsrisiken unserer Finanzierungstätigkeiten abgeschlossen wurden, bei der Position *Veränderungen kurzfristiger Finanzschulden und übriger Finanzierungstätigkeiten* zu Zahlungsabflüssen in Höhe von 721 Mio. EUR. Das Geschäftsjahr 2009 beinhaltete Zahlungseingänge in Höhe von 4,0 Mrd. EUR aus der Ausgabe mittelfristiger Schuldverschreibungen (*Medium Term Notes*), die teilweise durch die Rückzahlungen einer variabel verzinslichen verlängerbaren Anleihe (*Extendible Note*) in Höhe von 0,5 Mrd. EUR und variabel verzinsliche Schuldverschreibungen in Höhe von 750 Mio. USD kompensiert wurden. Die während des Geschäftsjahrs 2010 für das Geschäftsjahr 2009 an die Aktionäre ausgeschüttete Dividende führte zu Zahlungsmittelabflüssen in Höhe von 1,388 Mrd. EUR, während in der Vorjahresperiode die für die Zahlung der Dividende für das Geschäftsjahr 2008 angefallenen Mittelabflüsse 1,380 Mrd. EUR betragen.

## FINANZAUSSTATTUNG UND KAPITALERFORDERNISSE

Unsere **Finanzausstattung** umfasst verschiedene kurz- und langfristige Finanzinstrumente. Dazu gehören unter anderem Kredite von Finanzinstituten, kurzfristige Schuldverschreibungen (*Commercial Papers*) sowie mittelfristige Anleihen und Schuldverschreibungen. Zusätzliche Liquiditätsquellen sind *Zahlungsmittel und Zahlungsmitteläquivalente*, künftige Mittelzuflüsse aus laufender Geschäftstätigkeit und kurzfristig *Zur Veräußerung verfügbare finanzielle Vermögenswerte*.

Unsere **Kapitalerfordernisse** umfassen unter anderem die planmäßige Bedienung unserer Finanzschulden, die regelmäßigen Investitionen, die laufenden Kapitalerfordernisse der operativen Geschäftstätigkeit und des SFS-Finanzierungsgeschäfts, Dividendenzahlungen, Finanzierung der Pensionspläne sowie Mittelabflüsse in Zusammenhang mit Portfolioaktivitäten und mit Restrukturierungsmaßnahmen.

Die **Summe Finanzschulden** setzt sich zusammen aus *Anleihen und Schuldverschreibungen, Verbindlichkeiten gegenüber Kreditinstituten, Verbindlichkeiten aus Finanzierungs-Leasing sowie Sonstige Finanzschulden*, zum Beispiel kurzfristige Schuldverschreibungen. Die Summe Finanzschulden besteht aus den Positionen *Kurzfristige Finanzschulden und kurzfristig fällige Anteile langfristiger Finanzschulden sowie Langfristige Finanzschulden*, wie sie in der Konzernbilanz ausgewiesen sind. Die **Summe Liquidität** bezieht sich auf die liquiden Vermögenswerte, die uns am jeweiligen Bilanzstichtag zur Finanzierung unserer operativen Geschäftstätigkeit sowie zur Zahlung kurzfristig fälliger Verpflichtungen zur Verfügung standen. Sie besteht aus *Zahlungsmitteln und Zahlungsmitteläquivalenten* sowie aus kurzfristigen *Zur Veräußerung verfügbaren finanziellen Vermögenswerten*, wie sie in der Konzernbilanz ausgewiesen werden. Die **Nettoverschuldung** resultiert aus der Summe *Finanzschulden* abzüglich der Summe Liquidität. Unser Management verwendet die Größe *Nettoverschuldung* für das interne Finanzmanagement sowie für die externe Kommunikation mit Investoren, Analysten und Ratingagenturen. Deshalb glauben wir, dass eine Darstellung der *Nettoverschuldung* für diese Interessenten hilfreich ist. Allerdings sollte sie nicht losgelöst oder als Alternative zu den kurzfristigen und langfristigen Finanzschulden, wie sie im Einklang mit den IFRS ausgewiesen sind, verwendet werden. Für weiterführende Informationen zur Zweckmäßigkeit und der beschränkten Aussagekraft der Größe *Nettoverschuldung* siehe vorletzte Seite des Zusammengefassten Lageberichts.

| (in Mio. EUR)                                                                            | 30. September |               |
|------------------------------------------------------------------------------------------|---------------|---------------|
|                                                                                          | 2010          | 2009          |
| Kurzfristige Finanzschulden und kurzfristig fällige Anteile langfristiger Finanzschulden | 2.416         | 698           |
| Langfristige Finanzschulden                                                              | 17.497        | 18.940        |
| <b>Summe Finanzschulden</b>                                                              | <b>19.913</b> | <b>19.638</b> |
| Zahlungsmittel und Zahlungsmitteläquivalente                                             | 14.108        | 10.159        |
| Zur Veräußerung verfügbare finanzielle Vermögenswerte (kurzfristig)                      | 246           | 170           |
| <b>Summe Liquidität</b>                                                                  | <b>14.354</b> | <b>10.329</b> |
| <b>Nettoverschuldung<sup>1</sup></b>                                                     | <b>5.560</b>  | <b>9.309</b>  |

<sup>1</sup> Typischerweise verwenden wir einen bedeutenden Teil sowohl der Zahlungsmittel und Zahlungsmitteläquivalente als auch der kurzfristig Zur Veräußerung verfügbaren finanziellen Vermögenswerte nicht für die Rückzahlung der Finanzschulden, sondern für andere Zwecke. Der Abzug dieser Positionen von der Summe der Finanzschulden in der Berechnung der Nettoverschuldung sollte daher nicht derart verstanden werden, dass diese Positionen jederzeit ausschließlich für die Rückzahlung der Finanzschulden zur Verfügung stehen.

Die Veränderungen der *Nettoverschuldung* vom Geschäftsjahresende 2009 zum Geschäftsjahresende 2010 können wie folgt dargestellt werden:

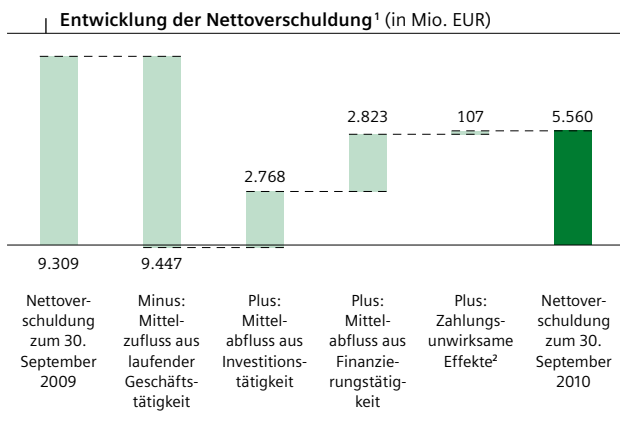

<sup>1</sup> Fortgeführte Aktivitäten.  
<sup>2</sup> Zahlungsunwirksame Effekte beinhaltet Einflüsse von Wechselkursänderungen auf die Nettoverschuldung sowie Effekte aus der Bilanzierung von Fair Value Hedges.

**Programm zur Begebung kurzfristiger Schuldverschreibungen** – Wir haben ein globales 9,0-Mrd.-USD-(6,6-Mrd.-EUR-) Programm zur Begebung kurzfristiger Schuldverschreibungen zur Verfügung, das in mehreren Währungen gezogen werden kann und auch die Möglichkeit der Begebung von verlängerbaren USD-Anleihen (*USD-Extendible-Notes*) enthält.

Im Geschäftsjahr 2010 haben wir kurzfristige Schuldverschreibungen in unterschiedlichen Beträgen begeben, um unsere laufenden kurzfristigen Kapitalerfordernisse zu erfüllen. Die Laufzeit unserer kurzfristigen Schuldverschreibungen ist üblicherweise kürzer als 90 Tage. Zum 30. September 2010 hatten wir keine kurzfristigen Schuldverschreibungen ausstehend. Alle im Geschäftsjahr 2010 begebenen Schuldverschreibungen wurden im Lauf des Jahres vollständig zurückgezahlt.

**Anleihen und Schuldverschreibungen** – Uns steht ein »Programm für die Ausgabe von Verschuldungsinstrumenten« (Medium-Term-Notes-Programm) mit einem Volumen in Höhe von 15,0 Mrd. EUR zur Verfügung. Dieses Programm haben wir im Mai 2010 aktualisiert. Im Mai 2009 hatten wir den maximalen Emissionsbetrag für dieses Programm von 10,0 Mrd. auf 15,0 Mrd. EUR erhöht. Zuvor hatten wir im Dezember 2008 den maximalen Emissionsbetrag von 5,0 Mrd. auf 10,0 Mrd. EUR erhöht. Unter dem Medium-Term-Notes-Programm haben wir die folgenden Notes begeben:

- > Im Februar 2009 emittierten wir festverzinsliche Schuldverschreibungen in Höhe von 4,0 Mrd. in zwei Tranchen, die eine Tranche in Höhe von 2,0 Mrd. EUR 4,125% Schuldverschreibungen, fällig im Februar 2013, sowie eine weitere Tranche in Höhe von 2,0 Mrd. EUR 5,125% Schuldverschreibungen, fällig im Februar 2017, umfasste.
- > Im Juni 2008 emittierten wir EUR-Schuldverschreibungen in Höhe von insgesamt 3,4 Mrd. EUR in drei Tranchen: Eine 5,25% Schuldverschreibung in Höhe von 1,2 Mrd. EUR ist im Dezember 2011 fällig, eine zweite 5,375% Schuldverschreibung in Höhe von 1,0 Mrd. EUR ist im Juni 2014 fällig, und eine dritte 5,625% Schuldverschreibung in Höhe von 1,2 Mrd. EUR ist im Juni 2018 fällig.
- > Im August 2008 erhöhten wir zwei Tranchen des Eurobonds um insgesamt 750 Mio. EUR. Davon sind 350 Mio. EUR 5,25% Schuldverschreibungen im Dezember 2011 fällig und 400 Mio. EUR 5,625% Schuldverschreibungen im Juni 2018.
- > Im März 2006 begaben wir unter diesem Programm Schuldverschreibungen in Höhe von insgesamt 1,0 Mrd. USD in zwei Tranchen in Höhe von jeweils 500 Mio. USD, fällig im März 2012 (verzinst mit USD LIBOR + 0,15%) und im März 2016 (verzinst mit 5,625%).

Zum 30. September 2010 standen unter dem Medium-Term-Notes-Programm Schuldverschreibungen in Höhe von nominal 8,9 Mrd. EUR aus.

Im September 2006 begaben wir eine nachrangige Hybrid-schuldverschreibung mit einer EUR-Tranche in Höhe von 900 Mio. EUR (verzinst mit 5,25 %) sowie einer GBP-Tranche in Höhe von 750 Mio. GBP (verzinst mit 6,125%). Beide Tranchen sind im September 2066 zur Rückzahlung fällig, wir können diese jedoch nach zehn Jahren oder zu einem späteren Zeitpunkt kündigen. Wird die Schuldverschreibung nicht gekündigt, dann sind beide Tranchen variabel zu verzinsen (die EUR-Tranche mit EURIBOR + 1,25 % und die GBP-Tranche mit GBP LIBOR + 1,25 %, beide zusätzlich mit einem Aufschlag von 1,0 %). Der Gesamtnominalbetrag unseres Hybrid-Bonds beträgt 1,8 Mrd. EUR.

Im August 2006 begaben wir 5,0 Mrd. USD-Schuldverschreibungen in vier Tranchen: eine 750 Mio. USD-Schuldverschreibung (verzinst mit USD LIBOR + 0,05%), fällig im August 2009, die am Fälligkeitstag zum Nominalbetrag zurückgezahlt wurde, eine 750 Mio. USD 5,5 % Schuldverschreibung, fällig im Februar 2012, eine 1,750 Mrd. USD 5,75 % Schuldverschreibung, fällig im Oktober 2016, und eine 1,750 Mrd. USD 6,125 % Schuldverschreibung, fällig im August 2026. Die festverzinslichen Schuldverschreibungen können von uns jederzeit vollständig oder teilweise zu dem in den Emissionsbedingungen festgelegten vorzeitigen Rückzahlungsbetrag zurückgekauft werden (Call). Zum 30. September 2010 standen von diesen Schuldverschreibungen nominal 3,1 Mrd. EUR aus.

Im Juni 2001 begaben wir Euro-Schuldverschreibungen in Höhe von insgesamt 4,0 Mrd. EUR in zwei Tranchen, von denen eine Tranche in Höhe von 2,0 Mrd. EUR (verzinst mit 5,75 %) mit Fälligkeit im Juli 2011 noch aussteht.

**Schuldscheindarlehen** – Im Juni 2008 haben wir Schuldscheindarlehen in Höhe von insgesamt 1,1 Mrd. EUR in vier Tranchen begeben: eine Tranche in Höhe von 370 Mio. EUR (verzinst mit EURIBOR + 0,55%) sowie eine Tranche in Höhe von 113,5 Mio. EUR (verzinst mit 5,283%), beide fällig im Juni 2013, sowie eine Tranche in Höhe von 283,5 Mio. EUR (verzinst mit EURIBOR + 0,7%) und eine Tranche in Höhe von 333 Mio. EUR (verzinst mit 5,435%), beide fällig im Juni 2015.

**Kreditlinien** – Es stehen uns drei Kreditlinien zur allgemeinen Unternehmensfinanzierung zur Verfügung. Zum 30. September 2010 sind uns Kreditlinien in Höhe von 7,0 Mrd. EUR zugesagt. Diese Kreditlinien beinhalten:

- > eine ungezogene, revolvingierende Kreditlinie in Höhe von 5,0 Mrd. USD (3,7 Mrd. EUR) mit einer Laufzeit bis März 2012, die ein internationales Bankenkonsortium bereitstellt und die in mehreren Währungen gezogen werden kann,
- > eine bis September 2012 laufende, bilaterale, ungezogene, revolvingierende Kreditlinie in Höhe von 450 Mio. EUR, die eine inländische Bank zur Verfügung stellt, und
- > eine Kreditlinie in Höhe von 4,0 Mrd. USD mit einer Laufzeit bis August 2013, die ein internationales Bankenkonsortium bereitstellt und die in mehreren Währungen gezogen werden kann. Diese Kreditlinie umfasst eine Tranche (»Term loan«) in Höhe von 1,0 Mrd. USD (0,7 Mrd. EUR), die im Januar 2007 gezogen wurde und im August 2013 fällig ist, sowie eine ungezogene, revolvingierende Kreditlinie in Höhe von 3,0 Mrd. USD (2,2 Mrd. EUR).

Zum 30. September 2010 waren 6,3 Mrd. EUR dieser Kreditlinien nicht gezogen.

Das Fälligkeitsprofil der oben beschriebenen Schuldscheindarlehen, Anleihen und Schuldverschreibungen stellt sich wie folgt dar:

**Fälligkeitsprofil Schuldscheindarlehen, Anleihen und Schuldverschreibungen** (ausstehende Nominalbeträge in Mrd. EUR)

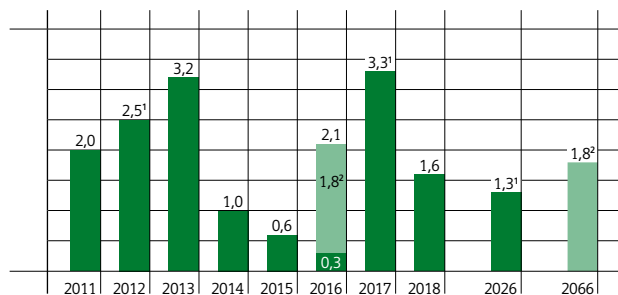

- 1 Die im August 2006 emittierten USD-Schuldverschreibungen können von uns jederzeit zu dem in den Emissionsbedingungen festgelegten vorzeitigen Rückzahlungsbetrag zurückgekauft werden (Call).
- 2 Die Fälligkeit der Hybridschuldverschreibung hängt von der Ausübung einer Kündigungsoption (Call-Option) ab: Die Schuldverschreibung kann von uns zum September 2016 oder zu einem späteren Zeitpunkt gekündigt werden. Sie ist spätestens im September 2066 zur Rückzahlung fällig.

Die von einem internationalen Bankenkonsortium bereitgestellten revolvingierenden Kreditlinien von 4 Mrd. USD und 5 Mrd. USD, die in mehreren Währungen gezogen werden können, sehen ein Kündigungsrecht des Darlehensgebers für den Fall

vor, dass die Siemens AG Tochtergesellschaft eines anderen Unternehmens wird oder eine Person oder eine Gruppe gemeinsam handelnder Personen die Kontrolle über die Siemens AG erwirbt, indem sie die Möglichkeit erhält, einen bestimmenden Einfluss auf die Tätigkeit der Siemens AG auszuüben. Die bilaterale, ungezogene, revolvingierende Kreditlinie von 450 Mio. EUR kann vom Darlehensgeber gekündigt werden, wenn es in den gesellschaftsrechtlichen Verhältnissen der Siemens AG zu erheblichen Veränderungen kommt, die die Rückzahlung des Kredits gefährden.

Keine unserer Kreditfazilitäten beinhaltet eine sogenannte Material-Adverse-Change-Klausel, wie sie bei Kreditfazilitäten dieser Art sonst häufig zu finden ist, und weder unsere Programme zur Begebung kurzfristiger Schuldverschreibungen und für die Ausgabe von Verschuldungsinstrumenten noch unsere Kreditfazilitäten enthalten spezielle Verpflichtungen zur Einhaltung von definierten Zinszahlungs-, Verschuldungs- oder Mindestkapitalgrenzen sowie zur Einhaltung eines bestimmten Ratingniveaus, die bei Verstoß eine vorzeitige Fälligkeitstellung oder die Stellung von Sicherheiten auslösen können.

Weitere Informationen über Finanzschulden sowie über unser Management von finanziellen Risiken und den Einsatz von Derivaten für Sicherungszwecke sind im »Anhang zum Konzernabschluss« zu finden.

Siemens hat bei der Bundesanstalt für Finanzdienstleistungsaufsicht (BaFin) einen Antrag auf Erteilung einer Erlaubnis zum Betreiben von Bankgeschäften gestellt. Der Antrag wird derzeit von der Behörde geprüft. Mithilfe eines lizenzierten Kreditinstituts möchte Siemens das Produktspektrum, insbesondere im Bereich der Absatzfinanzierung, erweitern, seine Flexibilität bei der Konzernfinanzierung erhöhen und das Risikomanagement optimieren.

**Investitionen in Immaterielle Vermögenswerte und Sachanlagen** – Aufgrund eines fortgesetzten stringenten Ansatzes für Investitionsausgaben sanken die Gesamtinvestitionen in *Immaterielle Vermögenswerte und Sachanlagen* im Geschäftsjahr 2010 auf 2,336 Mrd. EUR, verglichen mit 2,460 Mrd. EUR im Vorjahr. 1,724 Mrd. EUR unserer Investitionen in *Immaterielle Vermögenswerte und Sachanlagen* entfielen auf unsere drei Sektoren, und 612 Mio. EUR betreffen Investitionen vor allem von SRE und unseren Sektorübergreifenden Geschäften. Für weitere Informationen siehe »Anhang zum Konzernabschluss«.

Die Investitionsrate unserer Sektoren, definiert als das Verhältnis von *Investitionen in Immaterielle Vermögenswerte und Sachanlagen* zu Abschreibungen, betrug im Geschäftsjahr 2010 79%. Aufgrund einer Änderung der Rechnungslegungsverlautbarungen enthalten die *Investitionen in Immaterielle Vermögenswerte und Sachanlagen* seit Beginn des Geschäftsjahrs 2010 keine Zugänge zu vermieteten Vermögenswerten unter *Operating-Leasingverträgen*. Umgliederungen wurden rückwirkend vorgenommen, und die unten berichteten Investitionsraten sind auf einer vergleichbaren Basis dargestellt. Die Zugänge zu vermieteten Vermögenswerten unter *Operating-Leasingverträgen* belaufen sich für das Geschäftsjahresende zum 30. September 2010 auf 623 Mio. EUR (im Vj. 463 Mio. EUR). Für weitere Informationen siehe »Anhang zum Konzernabschluss«. Mittelfristig streben wir eine Investitionsrate innerhalb einer Bandbreite von 95 bis 115% an.

Die Investitionsraten für die Geschäftsjahre 2009 und 2010 stellen sich wie folgt dar:

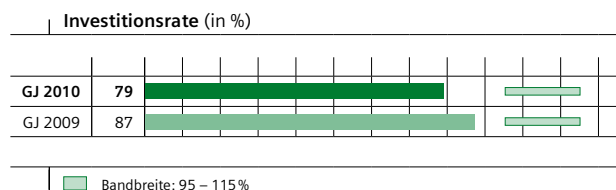

Wir leiteten einen beträchtlichen Teil unserer Investitionen im Geschäftsjahr 2010 in die Erweiterung der Kapazitäten in strategischen Wachstumsmärkten, insbesondere auch in Schwellenländer, um Marktanteile zu sichern und unsere Wettbewerbsfähigkeit in technologiegetriebenen Wachstumsmärkten zu erhalten. Dieses Vorgehen wurde besonders im Sektor Energy deutlich, der einen großen Teil seiner Investitionen in Höhe von 579 Mio. EUR für den technologiegetriebenen Windkraftmarkt tätigte, und im Sektor Industry, der einen Großteil seiner insgesamt 817 Mio. EUR für die neue energiesparende LED-Technologie bei OSRAM und für Produktinnovationen bei Building Technologies und Industry Automation investierte. Industry verwendete beträchtliche Investitionen auch für den Ersatz von technischen Anlagen und Maschinen, insbesondere bei Drive Technologies. Healthcare investierte im Geschäftsjahr 2010 328 Mio. EUR vor allem für die Entwicklung von Software und IT-Lösungen hauptsächlich bei Imaging & IT.

Die Entwicklung der Investitionen in Immaterielle Vermögenswerte und Sachanlagen in den Geschäftsjahren von 2009 bis 2010 stellt sich wie folgt dar:

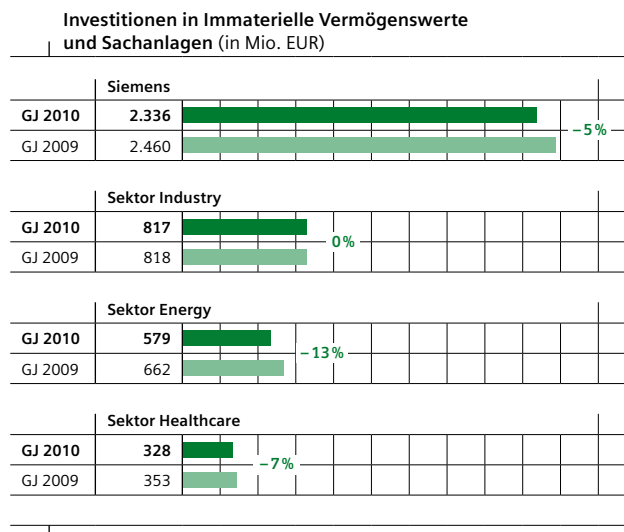

**Dividende** – Der Vorstand wird auf der Hauptversammlung am 25. Januar 2011 mit Zustimmung des Aufsichtsrats hinsichtlich der Verwendung des Bilanzgewinns der Siemens AG für das am 30. September 2010 beendete Geschäftsjahr vorschlagen, eine Dividende von 2,70 EUR je dividendenberechtigter nennwertloser Stückaktie, die am Tag der Hauptversammlung existiert, auszuschütten. Siemens erwartet hierfür gegenwärtig eine Ausschüttung von insgesamt rund 2,4 Mrd. EUR. Der verbleibende Betrag wird auf neue Rechnung vorgezogen.

#### Zahlungen, die fällig werden

| (in Mio. EUR)                                | Insgesamt     | Innerhalb von 1 Jahr | 1 – 3 Jahren | 4 – 5 Jahren | Nach 5 Jahren |
|----------------------------------------------|---------------|----------------------|--------------|--------------|---------------|
| Finanzschulden                               | 19.913        | 2.416                | 5.967        | 1.808        | 9.722         |
| Einkaufsverpflichtungen                      | 12.139        | 11.030               | 953          | 117          | 39            |
| Operating-Leasingverträge                    | 3.126         | 721                  | 969          | 612          | 824           |
| <b>Vertragliche Vereinbarungen insgesamt</b> | <b>35.178</b> | <b>14.167</b>        | <b>7.889</b> | <b>2.537</b> | <b>10.585</b> |

**Sonstige Kapitalerfordernisse** – Sonstige Kapitalerfordernisse beinhalten erwartete Mittelabflüsse teilweise in Zusammenhang mit Aufwendungen für Personalanpassungsmaßnahmen, insbesondere bei Siemens IT Solutions and Services, in Höhe von 399 Mio. EUR und beim Sektor Industry in Höhe von 200 Mio. EUR sowie aufgrund von im vierten Quartal des Geschäftsjahrs 2010 gebuchten Sondervergütungen in Höhe von 310 Mio. EUR für alle Mitarbeiter, die nicht dem oberen Management angehören.

Mit unserer Fähigkeit, Mittelzuflüsse aus laufender Geschäftstätigkeit zu generieren, unserer *Summe Liquidität* von 14,354 Mrd. EUR, mit ungezogenen Kreditlinien von 6,3 Mrd. EUR und mit dem bestehenden Kreditrating am Geschäftsjahresende sind wir der Überzeugung, dass wir ausreichend Flexibilität besitzen, um unsere Kapitalerfordernisse inklusive der planmäßigen Bedienung unserer Finanzschulden, die regelmäßigen Investitionen, die laufende Finanzierung der operativen Geschäftstätigkeit sowie des SFS-Finanzierungsgeschäfts, der Dividendenzahlungen, Finanzierung der Pensionspläne und Mittelabflüsse in Zusammenhang mit Portfolioaktivitäten zu decken. Wir sind außerdem der Überzeugung, dass unser Umlaufvermögen für die derzeitigen Erfordernisse der Gesellschaft ausreichend ist.

#### Vertragliche Verpflichtungen

Zu den wichtigsten zahlungswirksamen vertraglichen Verpflichtungen von Siemens innerhalb der gewöhnlichen Geschäftsaktivitäten gehören die Tilgung von Finanzschulden, Einkaufsverpflichtungen sowie Verpflichtungen aus Operating-Leasingverträgen.

Die folgende Tabelle gibt einen Überblick über das Volumen der künftigen Mittelabflüsse, die aus unseren vertraglichen Verpflichtungen zum 30. September 2010 resultieren werden:

**Finanzschulden** – Zum 30. September 2010 hatte Siemens ausstehende kurz- und langfristige Finanzschulden in Höhe von insgesamt 19,913 Mrd. EUR. Davon sind 2,416 Mrd. EUR innerhalb der nächsten zwölf Monate fällig. Die kurzfristigen Finanzschulden umfassen vor allem kurzfristige Anteile an langfristigen Schuldverschreibungen sowie Bankdarlehen, die jeweils innerhalb von zwölf Monaten zur Rückzahlung anstehen. Die gewichtete durchschnittliche Restlaufzeit der von Siemens emittierten Anleihen und Schuldverschreibungen mit einer Restlaufzeit von mehr als einem Jahr betrug zum 30. September 2010 5,62 Jahre. Für weitere Informationen über die Zusammensetzung unserer Finanzschulden verweisen wir auf den »Anhang zum Konzernabschluss«.

Die folgende Tabelle zeigt die Zusammensetzung der Finanzschulden von Siemens zum 30. September 2010:

| (in Mio. EUR)                                | Kurzfristig  | Langfristig   | Insgesamt     |
|----------------------------------------------|--------------|---------------|---------------|
| Anleihen und Schuldverschreibungen           | 2.062        | 15.238        | 17.300        |
| Verbindlichkeiten gegenüber Kreditinstituten | 283          | 1.981         | 2.264         |
| Sonstige Finanzschulden                      | 22           | 156           | 178           |
| Verbindlichkeiten aus Finanzierungsleasing   | 49           | 122           | 171           |
| <b>Finanzschulden insgesamt</b>              | <b>2.416</b> | <b>17.497</b> | <b>19.913</b> |

**Einkaufsverpflichtungen** – Zum 30. September 2010 betragen die Einkaufsverpflichtungen von Siemens 12,139 Mrd. EUR. Eine Einkaufsverpflichtung ist eine rechtlich verbindliche Verpflichtung zum Erwerb von Waren oder Dienstleistungen, die folgende Voraussetzungen erfüllt: (i) verpflichtende feste Abnahmemenge oder Mindestabnahmemenge, (ii) feste, variable oder Mindestpreisvereinbarung und (iii) ungefährer zeitlicher Rahmen für die Transaktion.

**Operating-Leasingverträge** – Zum 30. September 2010 hatte Siemens Zahlungsverpflichtungen aus nicht kündbaren Operating-Leasingverträgen in Höhe von insgesamt 3,126 Mrd. EUR. Für weitere Informationen verweisen wir auf den »Anhang zum Konzernabschluss«.

**Sonstiges** – Darüber hinaus bildete das Unternehmen Rückstellungen für Rückbau-, Stilllege- und ähnliche Verpflichtungen des Sachanlagevermögens. Diese stehen überwiegend in Zusammenhang mit Sanierungskosten aus Dekontamina-

tions- und Umweltschutzverpflichtungen (1,004 Mrd. EUR zum 30. September 2010) und Kosten für Rückbau-, Stilllege- und ähnliche Verpflichtungen von gemieteten Grundstücken und Gebäuden zum Ende der Mietzeit (49 Mio. EUR zum 30. September 2010). Die Sanierungskosten ergeben sich auf Basis der geschätzten Dekontaminations- und Umweltschutzverpflichtungen für die Stilllegung der Werke in Hanau (Werk Hanau) sowie für ein nukleares Forschungs- und Dienstleistungszentrum in Karlstein (Werk Karlstein), die Uran- und Mischoxidbrennelemente fertigten. Für weitere Informationen hierzu und zu Rückbau-, Stilllege- und ähnliche Verpflichtungen verweisen wir auf den »Anhang zum Konzernabschluss«.

Regelmäßige Beiträge oder zusätzliche Zuführungen zur Finanzierung unserer Pensionen und ähnlichen Verpflichtungen können unsere Liquidität beeinträchtigen. Zum 30. September 2010 und 2009 betragen unsere in der Bilanz ausgewiesenen Verbindlichkeiten für Pensionen und ähnliche Verpflichtungen 8,464 Mrd. EUR beziehungsweise 5,938 Mrd. EUR. Die ausgewiesene Verbindlichkeit kann jedoch in künftigen Perioden aufgrund von Änderungen in Parametern, insbesondere im Abzinsungsfaktor, jeweiliger anzuwendender staatlicher Vorgaben, neu hinzuerworbenen Versorgungsansprüchen (Service Cost) und des Zinsaufwands (Interest Cost) sowie des Anlageergebnisses unseres Fondsvermögens erheblich schwanken. Weitere Informationen zu den Beiträgen an und zu den Pensionszahlungen aus unseren wesentlichen Pensionszusagen und unseren wesentlichen pensionsähnlichen Verpflichtungen finden sich in »– Finanzierung der Pensionspläne« sowie in »Ziffer 24« im »Anhang zum Konzernabschluss«. Im Geschäftsjahr 2009 hat Siemens mit den Treuhändern seines größten britischen Pensionsplans eine Übereinkunft erzielt, aus der sich bis zum Jahr 2025 Bruttodotierungen von bis zu rund 600 Mio. EUR ergeben können. Zusätzliche Zuführungen zu unseren Pensionen können grundsätzlich dem Ermessen unseres Managements in künftigen Perioden unterliegen.

#### **Außerbilanzielle Verpflichtungen**

**Garantien (einschließlich Bürgschaften)** – Unsere Garantien und Bürgschaften umfassen im Wesentlichen Kreditgarantien und -bürgschaften sowie Vertragserfüllungsgarantien und -bürgschaften für Leistungen konzernfremder Dritter. Zum 30. September 2010 belief sich der nicht abgezinste maximal mögliche Betrag der Zahlungsverpflichtungen aus Garantien auf 7,996 Mrd. EUR. Kreditgarantien und -bürgschaften sichern die Zahlungsverpflichtungen von konzernfremden Dritten ab, die sich aus einer Lieferanten- oder Geschäftsbezie-



hung ergeben. Zusätzlich stellt Siemens für Gemeinschaftsunternehmen, assoziierte sowie sonstige Unternehmen, an denen wir Beteiligungen halten, Garantien zur Besicherung variabel nutzbarer Kreditlinien. Zum 30. September 2010 betrug unsere Kreditgarantien und Kreditbürgschaften 597 Mio. EUR. Im Rahmen von Konsortialgeschäften abgegebene gesamtschuldnerische Vertragserfüllungsgarantien und -bürgschaften sowie Anzahlungsgarantien und -bürgschaften garantieren dem Begünstigten die Erfüllung der liefervertraglichen Verpflichtungen. Sollte ein Konsortialpartner seine liefervertraglichen Verpflichtungen nicht erfüllen, wird der Begünstigte Anspruch darauf erheben, dass Siemens einen vereinbarten Maximalbetrag aus Garantien/Bürgschaften zahlt. Zum 30. September 2010 beliefen sich die Vertragserfüllungsgarantien und -bürgschaften auf 1,093 Mrd. EUR.

Im Geschäftsjahr 2007 hat die Bundesrepublik Deutschland ein Konsortium aus Siemens IT Solutions and Services und IBM Deutschland GmbH (IBM) beauftragt, die nicht militärische Informations- und Kommunikationstechnik der Bundeswehr zu modernisieren und zu betreiben (Projekt HERKULES). Die vertraglich vereinbarte Leistung wird in einer gesonderten Projektgesellschaft, der BWI Informationstechnik GmbH (BWI), erbracht, an der Siemens IT Solutions and Services beteiligt ist. Der Auftrag hat ein Gesamtvolumen von maximal rund 6 Mrd. EUR. Im Dezember 2006 wurden von Siemens im Rahmen dieses Auftrags verschiedene rechtlich und wirtschaftlich miteinander verbundene Haftungserklärungen zugunsten des Auftraggebers Bundesrepublik Deutschland und IBM, des Konsortialpartners, abgegeben. Die Haftungserklärungen gewährleisten, dass die Projektgesellschaft mit ausreichenden Mitteln ausgestattet ist, die Leistung zu erbringen und damit den Vertrag zu erfüllen. Aufgrund des Verbund- und vielschichtigen Charakters dieser Haftungserklärungen sind diese als eigene Kategorie »HERKULES«-Verpflichtungen aufgeführt. Die insgesamt mögliche Inanspruchnahme des Siemens-Konzerns beläuft sich zum 30. September 2010 auf 3,09 (im Vj. 3,49) Mrd. EUR und verringert sich über die noch verbleibende Vertragslaufzeit von sieben Jahren ab dem 30. September 2010 jeweils um circa 400 Mio. EUR per annum. Die jährliche Inanspruchnahme ist beschränkt auf rund 400 Mio. EUR, zuzüglich eines gegebenenfalls bestehenden Übertrags eines nicht ausgeschöpften Vorjahresbetrags von bis zu 90 Mio. EUR.

Zum 30. September 2010 betragen die Sonstigen Garantien und Bürgschaften 3,216 Mrd. EUR und beinhalteten Schadensersatzverpflichtungen, die in Zusammenhang mit dem Verkauf von Geschäftseinheiten stehen. Diese können, sofern sie geschäftsüblich für die entsprechenden Transaktionen sind, den Käufer vor jeglichen potenziellen steuerlichen, rechtlichen und anderen Unwägbarkeiten in Verbindung mit den übernommenen Geschäftseinheiten schützen. Sollte eine Inanspruchnahme von Siemens unter diesen Garantien oder Bürgschaften wahrscheinlich werden, werden wir eine Rückstellung in entsprechender Höhe bilden. Dies geschieht zusätzlich zur Bildung einer eventuellen unbedingten Verbindlichkeit. Die meisten gewährten Garantien/Bürgschaften haben fest vereinbarte Endfälligkeitstermine.

**Kapitaleinzahlungsverpflichtungen** – Zum 30. September 2010 bestanden Verpflichtungen zu Kapitaleinlagen in verschiedene Unternehmen in einer Höhe von 470 (im Vj. 294) Mio. EUR. Die Verpflichtung zum 30. September 2010 beinhaltet eine beteiligungsproportional bedingte Kapitaleinzahlungsverpflichtung gegenüber EN in Höhe von 172 (im Vj. 172) Mio. EUR. Der bedingte Betrag ist an die Vornahme von Akquisitionen und Investitionen durch EN geknüpft.

Weitere Informationen zu unseren Garantien und Eventualverbindlichkeiten sind im »Anhang zum Konzernabschluss« dargestellt.

#### **Finanzierung der Pensionspläne**

Zum 30. September 2010 lag der Anwartschaftsbarwert der leistungsorientierten Verpflichtung unter Berücksichtigung künftiger Gehaltssteigerungen und Rentenanhebungen (»Defined Benefit Obligation« – DBO) für die wesentlichen Pensionszusagen des Unternehmens bei 29,7 (im Vj. 25,1) Mrd. EUR. Diesen Pensionsverpflichtungen steht der aktuelle Marktwert des Fondsvermögens von 23,3 (im Vj. 21,1) Mrd. EUR gegenüber. Zum 30. September 2010 ergab sich damit eine Unterdeckung im Finanzierungsstatus der wesentlichen Pensionszusagen in Höhe von 6,4 Mrd. EUR. Im Vergleich dazu betrug die Unterdeckung zum Geschäftsjahresende 2009 4,0 Mrd. EUR. Das erzielte Anlageergebnis des Fondsvermögens für die zurückliegenden zwölf Monate betrug 2,3 Mrd. EUR und resultierte überwiegend aus festverzinslichen Wertpapieren und in geringerem Maße aus Aktienanlagen. Dies bedeutet eine Rendite von 10,8%, im Vergleich zur erwarteten Rendite von 6,4%.

Entscheidungen über Mittelzuführungen zum Fondsvermögen sind Teil der konservativen Finanzpolitik des Unternehmens, die ebenso eine permanente Analyse der Struktur unserer Pensionsverpflichtungen umfasst. Zur Abwägung von Rendite und Risiko hat Siemens ein Risikomanagementkonzept für seine Pensionswirtschaft entwickelt. Wir haben als Hauptrisiko eine Verschlechterung des Finanzierungsstatus der wesentlichen Pensionszusagen aufgrund gegenläufiger Entwicklungen des Fondsvermögens und/oder der DBO identifiziert. Wir überwachen unsere Vermögensanlagen und unsere DBO, um dieses Hauptrisiko zu messen. Es bemisst sich nach dem erwarteten maximalen Rückgang im Finanzierungsstatus für ein festgelegtes Konfidenzniveau und eine festgelegte Zeitspanne. Ein Risikobudget auf Konzernebene bildet die Basis für die Festlegung unserer Investitionsstrategie, das heißt der strategischen Portfoliostruktur der wesentlichen Fondsvermögen und des Grads der Absicherung von Zinsrisiken. Sowohl unser Risikobudget als auch unsere Investitionsstrategie werden regelmäßig unter Beteiligung von führenden externen Experten der internationalen Vermögensverwaltungs- und Versicherungswirtschaft besprochen, um einen ganzheitlichen Blick auf Fondsvermögen und Pensionsverbindlichkeiten zu ermöglichen. Die Auswahl von Vermögensverwaltern basiert auf unserer quantitativen und qualitativen Analyse. Anschließend werden deren Performance und Risiko laufend überwacht, sowohl auf Ebene einer Einzelbetrachtung als auch in einem umfassenderen Portfolio-Zusammenhang. Wir überprüfen die Vermögensstruktur jedes Pensionsplans unter Berücksichtigung der Duration der entsprechenden Pensionsverpflichtungen und analysieren Trends und Marktentwicklungen auf ihren Einfluss auf die Wertentwicklung unseres Pensionsvermögens, damit wir bereits in einem sehr frühen Stadium Gegenmaßnahmen einleiten können.

Zudem überprüft Siemens regelmäßig die Ausgestaltung seiner Pensionspläne. Historisch bedingt, ist die Mehrheit unserer Pensionspläne leistungsorientiert. Um die Risiken aus leistungsorientierten Pensionsplänen für das Unternehmen, wie Altersentwicklung, Inflation, Wirkung von Gehaltssteigerungen und sonstiger Faktoren, zu vermindern, haben wir in einigen unserer wesentlichen Regionalgesellschaften, zum Beispiel in Deutschland, den USA und Großbritannien, in den vergangenen Jahren neue Pläne eingeführt. Die Pensionszahlungen dieser neuen Pläne orientieren sich in erster Linie an

den vom Unternehmen geleisteten Beiträgen, werden aber dennoch – jedoch nur in geringem Maße – durch Altersentwicklung, Inflation und Gehaltssteigerungen beeinflusst. Wir beabsichtigen, die Notwendigkeit zur Einführung ähnlicher Pensionsmodelle in der Zukunft weiter zu prüfen, um eine bessere Steuerung der künftigen Pensionsverpflichtungen und der daraus resultierenden Kosten zu gewährleisten. Im Geschäftsjahr 2010 erfasste die Gesellschaft einen Ertrag in Höhe von 193 Mio. EUR aus der Kürzung von Pensionsplänen in den USA.

**Finanzierungsstatus der wesentlichen Pensionszusagen**  
(in Mrd. EUR)

| 30. Sept. 2010 | - 6,4 |  |  |  |  |  |  |  |  |
|----------------|-------|--|--|--|--|--|--|--|--|
| 30. Sept. 2009 | - 4,0 |  |  |  |  |  |  |  |  |

Zum 30. September 2010 ergab sich eine Unterdeckung im Finanzierungsstatus der wesentlichen pensionsähnlichen Verpflichtungen in Höhe von 0,7 Mrd. EUR. Im Vergleich dazu betrug die Unterdeckung zum Geschäftsjahresende 2009 0,6 Mrd. EUR. Die Rückstellungen für sonstige Zusagen für Pensionen und ähnliche Verpflichtungen beliefen sich zum 30. September 2010 und 2009 auf 1,2 Mrd. EUR beziehungsweise 1,1 Mrd. EUR.

Einzelheiten zu den Pensionsplänen von Siemens finden sich im »Anhang zum Konzernabschluss«.

## Vermögenslage

Während des Geschäftsjahrs 2010 erhöhte sich die Bilanzsumme auf 102,827 Mrd. EUR, im Vergleich zu 94,926 Mrd. EUR im Vorjahr. Unsere Vermögenslage im Geschäftsjahr 2010 war durch Währungsumrechnungseffekte hauptsächlich aufgrund der Stärkung des US-Dollars im Lauf des Geschäftsjahrs beeinflusst. Bereinigt um Währungsumrechnungseffekte, stieg die Bilanzsumme auf 98,960 Mrd. EUR an. Von der Bilanzsumme in Höhe von 102,827 Mrd. EUR entfallen zum 30. September 2010 12,506 Mrd. EUR auf das Gesamtvermögen der SFS. Dieses SFS-Gesamtvermögen stieg vor allem aufgrund von Währungsumrechnungseffekten gegenüber einem Wert in Höhe von 11,704 Mrd. EUR im Vorjahr an. Diese Beträge entsprechen in beiden Berichtsperioden 12% der Bilanzsumme von Siemens. Die Summe kurzfristige Vermögenswerte betrug im Geschäftsjahr 2010 48%, gegenüber 46% im Vorjahr.

Die folgende Tabelle zeigt die kurzfristigen Vermögenswerte zum jeweiligen Bilanzstichtag:

| (in Mio. EUR)                                                       | 30. September |               |
|---------------------------------------------------------------------|---------------|---------------|
|                                                                     | 2010          | 2009          |
| Zahlungsmittel und Zahlungsmitteläquivalente                        | 14.108        | 10.159        |
| Zur Veräußerung verfügbare finanzielle Vermögenswerte               | 246           | 170           |
| Forderungen aus Lieferungen und Leistungen und sonstige Forderungen | 14.971        | 14.449        |
| Sonstige kurzfristige finanzielle Vermögenswerte <sup>1</sup>       | 2.610         | 2.407         |
| Vorräte                                                             | 14.950        | 14.129        |
| Ertragsteuerforderungen                                             | 790           | 612           |
| Sonstige kurzfristige Vermögenswerte                                | 1.258         | 1.191         |
| Zur Veräußerung bestimmte Vermögenswerte                            | 715           | 517           |
| <b>Summe kurzfristige Vermögenswerte</b>                            | <b>49.648</b> | <b>43.634</b> |

<sup>1</sup> Aufgrund der im Geschäftsjahr 2010 rückwirkenden Anwendung der überarbeiteten Rechnungslegungsverlautbarung wurden bestimmte Derivate, die nicht die Voraussetzungen für die Bilanzierung einer Sicherungsbeziehung erfüllen, von kurzfristig zu langfristig umgegliedert (siehe »Anhang zum Konzernabschluss«).

Die *Zahlungsmittel und Zahlungsmitteläquivalente* beliefen sich zum 30. September 2010 auf 14,108 Mrd. EUR. Der Anstieg um 3,949 Mrd. EUR wurde in erster Linie durch hohe Zahlungsmittelzuflüsse aus laufender Geschäftstätigkeit getrieben. Weiterführende Informationen finden sich im Abschnitt »Finanzlage – Kapitalflussrechnung – Geschäftsjahre 2010 und 2009 im Vergleich«.

Der gegenüber dem Vorjahr erfolgte Anstieg um 522 Mio. EUR bei *Forderungen aus Lieferungen und Leistungen und sonstige Forderungen* und um 821 Mio. EUR bei *Vorräte* war hauptsächlich durch Währungsumrechnungseffekte bedingt.

Der Anstieg um 203 Mio. EUR der Position *Sonstige kurzfristige finanzielle Vermögenswerte* ergibt sich vor allem aus Veränderungen der Marktwerte von derivativen Finanzinstrumenten, die wir für unsere Sicherungsaktivitäten halten.

Zur *Veräußerung bestimmte Vermögenswerte* stiegen zum 30. September 2010 auf 715 Mio. EUR im Vergleich zu 517 Mio. EUR im Vorjahr an. Sie beinhalten zum 30. September 2010 unsere Beteiligung an Areva NP S.A.S., die vom Sektor Energy gehalten wird, und unseren Anteil an Electronics Assembly Systems (EA), der den Zentral gesteuerte Portfolioaktivitäten zugeordnet ist.

Die langfristigen Vermögenswerte betragen zum jeweiligen Bilanzstichtag:

| (in Mio. EUR)                                     | 30. September |               |
|---------------------------------------------------|---------------|---------------|
|                                                   | 2010          | 2009          |
| Geschäfts- und Firmenwerte                        | 15.763        | 15.821        |
| Sonstige Immaterielle Vermögenswerte              | 4.969         | 5.026         |
| Sachanlagen                                       | 11.748        | 11.323        |
| Nach der Equity-Methode bilanzierte Beteiligungen | 4.724         | 4.679         |
| Sonstige finanzielle Vermögenswerte <sup>1</sup>  | 11.296        | 10.525        |
| Latente Ertragsteuern                             | 3.940         | 3.291         |
| Sonstige Vermögenswerte                           | 739           | 627           |
| <b>Summe langfristige Vermögenswerte</b>          | <b>53.179</b> | <b>51.292</b> |

<sup>1</sup> Aufgrund der im Geschäftsjahr 2010 rückwirkenden Anwendung der überarbeiteten Rechnungslegungsverlautbarung wurden bestimmte Derivate, die nicht die Voraussetzungen für die Bilanzierung einer Sicherungsbeziehung erfüllen, von kurzfristig zu langfristig umgegliedert (siehe »Anhang zum Konzernabschluss«).

Der *Geschäfts- und Firmenwert* blieb zum 30. September 2010 nahezu unverändert bei 15,763 Mrd. EUR im Vergleich zu 15,821 Mrd. EUR im Vorjahr. Eine Reduzierung von *Geschäfts- und Firmenwerte* aufgrund einer Wertminderung in Höhe von 1,145 Mrd. EUR bei der Division Diagnostics im Sektor Healthcare im vierten Quartal des Geschäftsjahrs 2010 wurde weitestgehend durch Währungsumrechnungseffekte und durch Zugänge bei *Geschäfts- und Firmenwerte* vor allem aufgrund der Akquisition von 100% der Solel Solar Systems Ltd, eines Solarthermie-Unternehmens, der Division Renewable Energy

im Sektor Energy, ausgeglichen. Für weitere Informationen zur Wertminderung des Geschäfts- und Firmenwerts siehe »- Wertminderung des Geschäfts- und Firmenwerts bei der Division Diagnostics im Sektor Healthcare«.

Nach der Equity-Methode bilanzierte Beteiligungen stiegen zum 30. September 2010 auf 4,724 Mrd. EUR, im Vergleich zu 4,679 Mrd. EUR im Vorjahr, an. Der Anstieg ist auf neue Beteiligungen, Erhöhungen bei bestehenden Beteiligungen, die Wandlung eines 500-Mio.-EUR-Gesellschafterdarlehens an NSN in vorrangiges Eigenkapital (die unsere Beteiligung an NSN um 500 Mio. EUR erhöhte und keine Auswirkungen auf die Zahlungsmittelflüsse hatte) sowie Währungsumrechnungseffekte zurückzuführen. Diese Faktoren wurden teilweise kompensiert, und zwar hauptsächlich durch unseren Verlust in Zusammenhang mit unserer Beteiligung an NSN und den Verkauf unserer 25%-Minderheitsbeteiligung an Dräger Medical AG & Co. KG an den Mehrheitsgesellschafter Drägerwerk AG & Co. KGaA.

Die Zunahme von *Sonstige finanzielle Vermögenswerte* resultiert im Wesentlichen aus Veränderungen des Marktwerts des langfristigen Anteils von derivativen Finanzinstrumenten, die wir für unsere Sicherungsaktivitäten halten, sowie aus einem Anstieg der Darlehensforderungen insbesondere bei SFS. *Sonstige finanzielle Vermögenswerte* wurden im Geschäftsjahr 2010 durch die Wandlung des oben erwähnten 500-Mio.-EUR-Gesellschafterdarlehens in vorrangiges Eigenkapital reduziert. NSN gab bekannt, eine Vereinbarung mit Motorola, Inc. über den Erwerb der Mehrheit von Motorolas Mobilfunkinfrastrukturgeschäft abgeschlossen zu haben. Der Erwerb steht unter dem Vorbehalt der üblichen Vertragsabschlussbedingungen einschließlich der Genehmigung durch die Regulierungsbehörden. Siemens und Nokia beabsichtigen, unter bestimmten Bedingungen je weitere 250 Mio. EUR aus den Gesellschafterdarlehen an NSN in vorrangiges Eigenkapital umzuwandeln. Die Umwandlung würde bei uns nicht zahlungswirksam wirken.

Unsere kurz- und langfristigen Verbindlichkeiten betragen zum jeweiligen Bilanzstichtag:

| (in Mio. EUR)                                                                            | 30. September |               |
|------------------------------------------------------------------------------------------|---------------|---------------|
|                                                                                          | 2010          | 2009          |
| Kurzfristige Finanzschulden und kurzfristig fällige Anteile langfristiger Finanzschulden | 2.416         | 698           |
| Verbindlichkeiten aus Lieferungen und Leistungen                                         | 7.880         | 7.593         |
| Sonstige kurzfristige finanzielle Verbindlichkeiten <sup>1</sup>                         | 1.401         | 1.600         |
| Kurzfristige Rückstellungen                                                              | 5.138         | 4.191         |
| Ertragsteuerverbindlichkeiten                                                            | 1.816         | 1.936         |
| Sonstige kurzfristige Verbindlichkeiten                                                  | 21.794        | 20.311        |
| Zur Veräußerung bestimmte Verbindlichkeiten                                              | 146           | 157           |
| <b>Summe kurzfristige Verbindlichkeiten und Rückstellungen</b>                           | <b>40.591</b> | <b>36.486</b> |
| Langfristige Finanzschulden                                                              | 17.497        | 18.940        |
| Pensionen und ähnliche Verpflichtungen                                                   | 8.464         | 5.938         |
| Latente Ertragsteuern                                                                    | 577           | 776           |
| Rückstellungen                                                                           | 3.332         | 2.771         |
| Sonstige finanzielle Verbindlichkeiten <sup>1</sup>                                      | 990           | 706           |
| Sonstige Verbindlichkeiten                                                               | 2.280         | 2.022         |
| <b>Summe langfristige Verbindlichkeiten und Rückstellungen</b>                           | <b>33.140</b> | <b>31.153</b> |

<sup>1</sup> Aufgrund der im Geschäftsjahr 2010 rückwirkenden Anwendung der überarbeiteten Rechnungslegungsverlautbarung wurden bestimmte Derivate, die nicht die Voraussetzungen für die Bilanzierung einer Sicherungsbeziehung erfüllen, von kurzfristig zu langfristig umgegliedert (siehe »Anhang zum Konzernabschluss«).

*Kurzfristige Finanzschulden und kurzfristig fällige Anteile langfristiger Finanzschulden* beliefen sich zum Geschäftsjahresende 2010 auf 2,416 Mrd. EUR und waren damit um 1,718 Mrd. EUR höher als am Ende des vorherigen Geschäftsjahrs. Der Anstieg resultiert vor allem aus der Umgliederung einer 2,0 Mrd. EUR 5,75% Euro-Schuldverschreibung (vorher unter *Langfristige Finanzschulden* ausgewiesen), die teilweise durch die Rückzahlung von kurzfristigen Schuldverschreibungen kompensiert wurde.

Der Anstieg bei *Verbindlichkeiten aus Lieferungen und Leistungen* um 287 Mio. EUR resultiert vor allem aus Währungsumrechnungseffekten.

Der Anstieg bei *Sonstige kurzfristige Verbindlichkeiten* um 1,483 Mrd. EUR im Vergleich zum Vorjahr folgt hauptsächlich aus höheren erhaltenen Anzahlungen auf noch nicht abge-

schlossene Auftragsfertigungsprojekte vor allem im Sektor Energy. Zum 30. September 2010 enthielt *Sonstige kurzfristige Verbindlichkeiten* eine Verbindlichkeit in Höhe von 310 Mio. EUR aufgrund einer Sondervergütung für Mitarbeiter, die nicht dem oberen Management angehören.

*Langfristige Finanzschulden* verringerten sich gegenüber dem Vorjahr um 1,443 Mrd. EUR. Dieser Rückgang ist hauptsächlich auf die oben erwähnte Umgliederung der 2,0 Mrd. EUR 5,75% Euro-Schuldverschreibung zu *Kurzfristige Finanzschulden und kurzfristig fällige Anteile langfristiger Finanzschulden* zurückzuführen, die teilweise durch Effekte aus der Bilanzierung von Fair Value Hedges sowie aus Währungsumrechnungseffekten kompensiert wurden.

*Pensionen und ähnliche Verpflichtungen* stiegen zum 30. September 2010 auf 8,464 Mrd. EUR im Vergleich zum Vorjahr in Höhe von 5,938 Mrd. EUR an. Dieser Anstieg spiegelt die angewachsene Deckungslücke bei den wesentlichen Siemens-Pensionsplänen von 4,0 Mrd. EUR im Vorjahr auf 6,4 Mrd. EUR zum 30. September 2010 wider.

Der Anstieg bei *Kurzfristige Rückstellungen* und der Anstieg bei langfristigen *Rückstellungen* beinhalten höhere Gewährleistungsrückstellungen, höhere auftragsbezogene Rückstellungen für Drohverluste und Risiken sowie aufgrund der Änderungen der Abzinsungsfaktoren höhere Rückbau-, Stilllege- und ähnliche Verpflichtungen.

Der Anstieg bei *Sonstige finanzielle Verbindlichkeiten* um 284 Mio. EUR resultiert hauptsächlich aus den Marktwertänderungen des langfristigen Anteils von derivativen Finanzinstrumenten, die für Sicherungszwecke gehalten werden.

Das Eigenkapital und die Bilanzsumme betragen zum jeweiligen Bilanzstichtag:

| (in Mio. EUR)                                          | 30. September  |               |
|--------------------------------------------------------|----------------|---------------|
|                                                        | 2010           | 2009          |
| <b>Summe Eigenkapital der Aktionäre der Siemens AG</b> | <b>28.346</b>  | <b>26.646</b> |
| <i>Eigenkapitalquote</i>                               | 28%            | 28%           |
| Nicht beherrschende Anteile                            | 750            | 641           |
| <b>Bilanzsumme</b>                                     | <b>102.827</b> | <b>94.926</b> |

Die *Summe Eigenkapital der Aktionäre der Siemens AG* erhöhte sich im Vergleich zum Vorjahr um 1,700 Mrd. EUR auf 28,346 Mrd. EUR zum Ende des Geschäftsjahrs 2010. Der Anstieg der Summe Eigenkapital ist auf den auf die Aktionäre der Siemens AG entfallenden Gewinn (nach Steuern) in Höhe von 3,899 Mrd. EUR und auf positive Währungsumrechnungseffekte in Höhe von 1,179 Mrd. EUR zurückzuführen. Diese Faktoren wurden teilweise durch die Dividendenausschüttung in Höhe von 1,388 Mrd. EUR sowie durch versicherungsmathematische Verluste aus Pensionen und ähnlichen Verpflichtungen in Höhe von 2,053 Mrd. EUR kompensiert.

Aufgrund des Anstiegs sowohl der Bilanzsumme als auch der *Summe Eigenkapital der Aktionäre der Siemens AG* gegenüber dem Vorjahr betrug die Eigenkapitalquote ohne nicht beherrschende Anteile weiterhin 28%.

Für weitere Informationen zu unserer Vermögens- und Finanzlage verweisen wir auf den »Anhang zum Konzernabschluss«.

#### WERTMINDERUNG DES GESCHÄFTS- UND FIRMENWERTS BEI DER DIVISION DIAGNOSTICS IM SEKTOR HEALTHCARE

Zum 30. September 2010 wurde die planmäßige jährliche Werthaltigkeitsprüfung des Geschäfts- und Firmenwerts der Division Diagnostics im Sektor Healthcare durchgeführt. Als Ergebnis wurde der Geschäfts- und Firmenwert um 1,145 Mrd. EUR wertgemindert und damit vorwiegend aufgrund von Fremdwährungseffekten um einen geringeren Betrag als in der vormals veröffentlichten Schätzung. Die Division Diagnostics geht aus den Akquisitionen der Diagnostic Products Corporation (DPC), der Diagnostics Division der Bayer AG und der Dade Behring, Inc. hervor. Die Division agiert am globalen Gesundheitsmarkt für Diagnostiksysteme und Verbrauchsmaterialien, der sich steigenden Kostenbeschränkungen ausgesetzt sieht, jedoch weiterhin – hauptsächlich in Zusammenhang mit dem Megatrend »Demografischer Wandel« – als Wachstumsmarkt eingeschätzt wird. Während die in Verbindung mit der Integration der drei akquirierten Gesellschaften angestrebten Kostenziele erreicht wurden, wurden die Wachstumsziele nicht erfüllt.

Als Ergebnis der strategischen Überprüfung, die im vierten Quartal des Geschäftsjahrs 2010 abgeschlossen wurde, wurden die mittelfristigen Wachstumserwartungen der Division und die langfristigen Marktentwicklungen in der Labordiagnostik neu bewertet und der Geschäftsplan der Division entsprechend angepasst, um die erwarteten niedrigeren Wachstumserwartungen widerzuspiegeln. Zahlungsmittelflüsse jenseits des fünfjährigen Planungszeitraums wurden unter Anwendung einer gleichbleibenden Wachstumsrate von 2,25 % extrapoliert. Die wesentlichen Gründe für diese niedrigeren Wachstumserwartungen und die deswegen angepassten Geschäftsziele sind verzögerte Entwicklungsaktivitäten im Technologie- und Produktbereich, verbunden mit zunehmendem Wettbewerb. Der aufgrund der strategischen Überprüfung angepasste Geschäftsplan war die Basis für den jährlichen Wertminderungstest für den Geschäfts- und Firmenwert im vierten Quartal des Geschäftsjahrs 2010.

Hinsichtlich des geschätzten Marktwerts von Diagnostics wurde unterstellt, dass dieser vor allem durch den Endwert (Barwert der ewigen Rente) bestimmt wird. Zahlungsmittelflüsse nach der fünfjährigen Planungsperiode wurden mit einer konstanten Wachstumsrate von 2,25 % extrapoliert. Es wurde ein Nachsteuerabzinsungsfaktor von 7 % verwendet. Der erzielbare Betrag für die Division Diagnostics, der als beizulegender Zeitwert, abzüglich der Verkaufskosten, ermittelt wurde, beträgt 8,300 Mrd. EUR. Ein Rückgang der Wachstumsrate für den Endwert um 0,25 Prozentpunkte würde den erzielbaren Betrag der Division um mehr als 3,6 % reduzieren. Der erzielbare Betrag der Division würde bei einem Anstieg des Abzinsungssatzes um 0,5 Prozentpunkte um 9,1 % sinken.

Mit Ausnahme der Division Diagnostics im Sektor Healthcare wurden – wie oben beschrieben – im Rahmen der Werthaltigkeitsprüfung für das Geschäftsjahr 2010 die erzielbaren Beträge der Divisionen und der Sektorübergreifenden Geschäften deutlich höher als die Buchwerte eingeschätzt. Für weitere Informationen verweisen wir auf den »Anhang zum Konzernabschluss«.

## Gesamtaussage zur wirtschaftlichen Lage

Siemens beendete das Geschäftsjahr 2010 als ein stärker fokussiertes Unternehmen mit einer starken operativen Dynamik. Der Gewinn nach Steuern und das Ergebnis Summe Sektoren lagen über den Ergebnissen des Vorjahrs. Alle drei Sektoren steigerten den Free Cash Flow erheblich gegenüber dem Vorjahr. Außerdem kehrte Siemens nach der Wirtschaftskrise, insbesondere in seinen kurzzyklischen Geschäften, wieder zu Auftragswachstum zurück und erzielte einen Umsatz fast auf Vorjahresniveau, was auch auf die stetige Umwandlung des hohen Auftragsbestands in laufendes Geschäft zurückzuführen ist. Die Entwicklung des Auftragseingangs verlief in der zweiten Hälfte des abgelaufenen Geschäftsjahrs deutlich robuster als im ersten Halbjahr, da unsere Sektoren die Möglichkeiten der verbesserten Marktbedingungen konsequent nutzten.

Im Geschäftsjahr 2010 haben wir unser Fit42010-Programm abgeschlossen. Wir glauben, dass dieses Programm Siemens in kultureller, organisatorischer und leistungsbezogener Hinsicht erfolgreich verändert hat. Zwar haben wir die finanziellen Ziele von Fit42010 grundsätzlich erreicht, konnten aber im Geschäftsjahr 2010 nicht jedes quantitative Ziel des Programms erfüllen. Wir haben uns diese Ziele auf der Grundlage normaler Geschäftszyklen gesetzt, bevor die globale Rezession und negative Auswirkungen der Finanzkrise das Wachstum unserer Geschäfte in den Geschäftsjahren 2009 und 2010 erheblich beeinträchtigten. Daher lag unser organisches Umsatzwachstum im Geschäftsjahr 2010 unter dem Zielwert (siehe »Geschäft und Rahmenbedingungen – Finanzielle Steuerungsgrößen«). Wir erreichten aber über den gesamten Zeitraum unseres Fit42010-Programms ein durchschnittliches jährliches organisches Umsatzwachstum von 4 %, das doppelt so hoch ist wie das von IHS Global Insight für diesen Zeitraum berichtete Wachstum des realen globalen BIP. Eine weitere wesentliche Komponente von Fit42010 war die Optimierung unseres Geschäftsportfolios wie der Verkauf von 51 % unseres Anteils am Enterprise-Networks-Geschäft. Im Geschäftsjahr 2010 haben wir die Verschlankung unserer Zentral gesteuerten Portfolioaktivitäten im Wesentlichen abgeschlossen, indem wir einen Käufer für unser Electronics-Assembly-Systems-Geschäft gefunden haben.



Im vierten Quartal des Geschäftsjahrs 2010 schlossen wir eine strategische Überprüfung ab, die zu einer Neubewertung der mittelfristigen Wachstumsaussichten und der langfristigen Marktentwicklung des Labordiagnostikgeschäfts führte. Nach Abschluss der jährlichen Werthaltigkeitsprüfung nahmen wir eine erhebliche Wertminderung von Geschäfts- und Firmenwerten vor, die das Ergebnis von Healthcare gegenüber dem Vorjahr reduzierte. Außerdem nahmen wir eine strategische Neuausrichtung unseres IT-Geschäfts mit dem Ziel vor, dessen Wettbewerbsposition zu stärken, teilweise durch Personalanpassungsmaßnahmen. Die damit verbundenen Belastungen führten zu einem Verlust in diesem Geschäft für das Geschäftsjahr 2010.

Unter Berücksichtigung dieser Faktoren meinen wir, dass wir die Ziele des Fit42010-Programms erfolgreich erreicht haben.

Unser Bekenntnis zu einem starken Finanzprofil mit einer konservativen Kapitalstruktur, einer starken Liquiditätsposition und einem gesunden Fälligkeitsprofil unserer Finanzschulden blieb im Geschäftsjahr 2010 unverändert. Unsere Eigenkapitalquote ohne nicht beherrschende Anteile blieb konstant bei 28%. Der Vorstand und der Aufsichtsrat schlagen vor, eine Dividende von 2,70 EUR je Aktie auszuschütten. Im Vorjahr betrug die Dividende 1,60 EUR je Aktie.

## Nachtragsbericht

Seit dem 30. September 2010 sind keine Vorgänge von besonderer Bedeutung eingetreten, von denen ein wesentlicher Einfluss auf die Vermögens-, Finanz- und Ertragslage von Siemens erwartet wird.

# Bericht über die voraussichtliche Entwicklung mit ihren wesentlichen Chancen und Risiken

## PROGNOSEBERICHT

### Gesamtwirtschaftliche Entwicklung

IHS Global Insight erwartet nach 2010 auch für die beiden kommenden Jahre 2011 und 2012 ein reales Wachstum der Weltwirtschaft von über 3%, wobei das Bruttoinlandsprodukt (BIP) der Schwellenländer weiter deutlich schneller als das der Industrienationen zunehmen wird. Die Prognose des weltweiten Wirtschaftswachstums für das Kalenderjahr 2011 beläuft sich auf 3,3% und schwächt sich damit leicht gegenüber dem für 2010 erwarteten Wachstum von 3,8% ab. Für 2012 geht IHS Global Insight von einem Wachstum von 3,6% aus. Regional betrachtet ergeben sich deutliche Unterschiede. Unsere beiden Berichtsregionen Europa, GUS, Afrika, Naher und Mittlerer Osten sowie Amerika werden voraussichtlich wesentlich verhaltener wachsen als die Region Asien, Australien. Für die Region Europa, GUS, Naher und Mittlerer Osten wird für 2011 eine Zuwachsrate von 2,4% und 2012 von 2,6% prognostiziert. Die Wachstumserwartungen für die Region Amerika belaufen sich auf 2,7% im Jahr 2011 und 3,3% im Jahr 2012. Für die Region Asien, Australien wird in 2011 zwar ein Rückgang des BIP-Wachstums gegenüber 2010 erwartet, es wird aber nach Prognose von IHS Global Insight 2011 immer noch bei 4,9% liegen und soll im Jahr 2012 auf 5,3% zulegen.

Bei der Entwicklung der Bruttoanlageinvestitionen rechnet IHS Global Insight für das Kalenderjahr 2011 mit einer Zunahme um real 5,8% gegenüber dem Vorjahr. Damit würde das vor der Wirtschaftskrise erreichte Investitionsniveau überschritten. Für 2012 erwartet IHS Global Insight einen weiteren Anstieg der Bruttoanlageinvestitionen um 6,5%. Getragen wird dieses Wachstum insbesondere von den Regionen Asien, Australien sowie Amerika. Für Asien, Australien erwartet Global Insight ein Wachstum von 6,9% im Jahr 2011 und von 7,2% in 2012. Für die Region Amerika beläuft sich die Prognose auf ein Wachstum von 6,5% im Jahr 2011 und 8,6% in 2012. Deutlich geringer fallen die Wachstumserwartungen für die Region Europa, GUS, Afrika, Naher und Mittlerer Osten mit jeweils 3,7% in 2011 und 2012 aus.

Für die Wertschöpfung des verarbeitenden Gewerbes, die sich im Kalenderjahr 2010 mit einem Wachstum von 10,1% sehr rasch von dem starken Einbruch während der Weltwirt-

schaftskrise erholte, rechnet IHS Global Insight mit Zuwächsen von 5,6% im Jahr 2011 und 5,3% in 2012 und damit mit einer Normalisierung der Wachstumsraten. Insbesondere das Wachstum der Region Asien, Australien wird nach Schätzung von IHS Global Insight von historisch hohen 15,4% im Jahr 2010 auf 8,1% in 2011 und 7,6% in 2012 zurückgehen und damit auf den Wachstumspfad vor der Weltwirtschaftskrise zurückkehren.

Die hier dargestellten Prognosen für das Bruttoinlandsprodukt und die Bruttoanlageinvestitionen basieren auf Angaben von IHS Global Insight vom 15. Oktober 2010, die Daten für die Wertschöpfung des verarbeitenden Gewerbes basieren auf Angaben von IHS Global Insight, die einem Bericht vom 22. Oktober 2010 entnommen sind. Die Daten wurden von uns nicht unabhängig verifiziert.

### Branchenentwicklung

Während die Nachfrage an den kurzzyklischen **Industriemärkten** im abgelaufenen Geschäftsjahr bereits frühzeitig wieder kräftig anzog, begannen sich die langzyklischen Märkte im Geschäftsjahr 2010 nur teilweise zu erholen. Wir erwarten für die nächsten beiden Geschäftsjahre, dass die Märkte unserer kurzzyklischen Geschäfte jährlich im Durchschnitt ein hohes einstelliges Wachstum verzeichnen werden. Wir gehen bei unserer Prognose für die beiden nächsten Geschäftsjahre auch von einem Wachstum bei unseren langzyklischen Geschäften aus. Wir erwarten hier aber ein geringeres Wachstum als bei unseren kurzzyklischen Geschäften.

An den vom Sektor **Energy** bedienten Märkten wurde die Talsohle im zweiten Halbjahr des Geschäftsjahrs 2010 durchlaufen. Für die beiden kommenden Geschäftsjahre erwarten wir, dass sich die Energiemärkte insgesamt deutlich erholen werden. Maßgeblich hierfür sind der steigende Energiebedarf aufgrund des Wirtschaftswachstums sowie die Umsetzung von umweltfreundlichen Vorgaben. Darüber hinaus bauen die Schwellenländer ihrer Energieinfrastruktur aus, während die Industrienationen veraltete Infrastruktur modernisieren.

Im Gesundheitswesen, in dem sich unser Sektor **Healthcare** bewegt, sehen wir aufgrund des Wachstums in den Schwellenmärkten sowie einer moderaten Erholung in den USA eine Verbesserung der Aussichten über die nächsten beiden Geschäftsjahre. Wir erwarten, dass diese Faktoren mögliche Auswirkungen der Sparanstrengungen der öffentlichen Haushalte im Gesundheitswesen, insbesondere in Europa, ausglei-

chen werden. Daher gehen wir in den nächsten beiden Geschäftsjahren von einem prozentual mittleren einstelligen Wachstum für den gesamten Gesundheitsmarkt aus.

## Siemens-Konzern

### Ertragslage

Für die Prognose des Siemens-Konzerns sowie unserer Segmente gehen wir von den oben genannten Erwartungen hinsichtlich der allgemeinen Wirtschaftsentwicklung sowie der speziellen Branchenentwicklungen für die beiden nächsten Geschäftsjahre aus. Die Prognose basiert auf einem Wechselkurs von 1,35 US-Dollar pro EUR.

Mit der fortdauernden Verbesserung der von Siemens bedienten Märkte erwarten wir, dass der **Auftragseingang** im Geschäftsjahr 2011 deutlich gegenüber dem Geschäftsjahr 2010 ansteigen wird. Wir erwarten, dass das Wachstum des Auftragseingangs insbesondere vom Wachstum des Windenergie- und Transportgeschäfts profitieren wird. Nach einem Rückgang im Geschäftsjahr 2010 erwarten wir für Siemens im Geschäftsjahr 2011 ein moderates **organisches Umsatzwachstum**. Zu den Annahmen, die dieser Prognose zugrunde liegen, gehören die oben genannte erfolgreiche Erholung der Weltwirtschaft sowie Wachstumserwartungen bezüglich unseres Umweltportfolios. Außerdem erwarten wir, dass der Umsatz durch die Umsetzung unseres hohen Auftragsbestands der Summe Sektoren, der sich zum Ende des Geschäftsjahrs 2010 auf 87 Mrd. EUR belief, begünstigt wird. Wir erwarten, hiervon ungefähr 39 Mrd. EUR im Geschäftsjahr 2011 und 19 Mrd. EUR im Geschäftsjahr 2012 in Umsatz umzusetzen. Beim Auftragsbestand erwarten wir für das Geschäftsjahr 2011, dass der Sektor Energy 21 Mrd. EUR seines Auftragsbestands von 53 Mrd. EUR, der Sektor Industry 14 Mrd. EUR seines Auftragsbestands von 28 Mrd. EUR und der Sektor Healthcare 3,5 Mrd. EUR seines Auftragsbestands von 7 Mrd. EUR in Umsatz umsetzen werden. Ausgehend von einer positiven Entwicklung an den globalen Energiemärkten sowie an unseren langzyklischen Industriemärkten, erwarten wir ein anhaltendes organisches Umsatzwachstum im Geschäftsjahr 2012. Wir gehen davon aus, dass der Umsatz von dem erwarteten Book-to-Bill-Verhältnis von über 1 im Geschäftsjahr 2011 profitieren wird, da das oben genannte erwartete deutliche Wachstum des Auftragseingangs in unseren Windenergie- und Transportgeschäften in Zukunft zu Umsatzwachstum führen wird.

Wie bereits erwähnt, erwarten wir, dass der Umsatz unseres Umweltportfolios von 27,6 Mrd. EUR im Geschäftsjahr 2010 auf über 40 Mrd. EUR im Geschäftsjahr 2014 steigen wird. Wir erwarten, dass der Umsatz aus unserem Umweltportfolio mit einer höheren Wachstumsrate zulegen wird als der Umsatz von Siemens insgesamt. Im Geschäftsjahr 2010 betrug der Anteil der Umsätze in Schwellenländern ungefähr 30% des Gesamtumsatzes. Siemens beabsichtigt, diesen Anteil in Zukunft zu erhöhen. Wir konzentrieren uns vorwiegend auf organisches Wachstum. Unsere Strategie umfasst aber auch Optionen zur Stärkung unseres Kerngeschäfts durch Akquisitionen und Desinvestitionen.

Wir erwarten, dass der **Gewinn der fortgeführten Aktivitäten** im Geschäftsjahr 2011 um mindestens 25 bis 35% gegenüber dem Wert des Geschäftsjahrs 2010 steigen wird. Von dieser Prognose ausgenommen sind Wirkungen, die sich aus rechtlichen und regulatorischen Angelegenheiten ergeben könnten. Zu den Annahmen, die dieser Prognose zugrunde liegen, gehören das oben genannte erwartete Umsatzwachstum, die Profitabilität der Sektoren innerhalb ihrer angepassten EBITDA-Margenkorridore sowie Ergebnisverbesserungen unterhalb der Sektoren wie unten genannt. Zu den weiteren Annahmen gehören begrenzte Währungseffekte, ein nur geringfügig steigender Preisdruck und ein positiver Beitrag aus dem Supply Chain Management. Wir erwarten, dass die Aufwendungen für Forschung und Entwicklung im Geschäftsjahr 2011 sowohl absolut als auch in Prozent vom Umsatz ansteigen werden. Im Rahmen unserer Wachstumspläne in bestimmten Märkten und Regionen planen wir auch, unsere Vertriebs- und allgemeinen Verwaltungsaufwendungen in absoluten Beträgen gegenüber dem Geschäftsjahr 2010 zu erhöhen. Dies gilt insbesondere bei Vertriebskosten für Markteintrittsaktivitäten. Wir werden die Entwicklung des Wachstums des Auftragseingangs genau beobachten und unsere Planungen für Forschungs- und Entwicklungskosten sowie für die Vertriebs- und allgemeinen Verwaltungskosten umgehend überprüfen, wenn unsere Wachstumsdynamik nachlassen sollte. Wir erwarten, dass der Ergebnisbeitrag aus dem Supply Chain Management im Geschäftsjahr 2011 eingeschränkter sein wird als im Geschäftsjahr 2010, während wir andererseits davon ausgehen, dass sich der Preisdruck von unseren Kunden gegenüber dem Vorjahr, vorwiegend aufgrund zunehmender Wettbewerbsdynamik im Energiesektor, insbesondere in China, erhöhen wird. Ausgehend von einem positiven makroökonomischen Umfeld, einem Umsatzwachstum sowie einer erfolgreichen Umsetzung unserer Markteintrittsaktivitäten er-

warten wir für das Geschäftsjahr 2012 eine positive Entwicklung des Gewinns aus fortgeführten Aktivitäten.

Wir sind Währungsumrechnungseffekten ausgesetzt, die den US-Dollar, das Britische Pfund und die Währungen der Schwellenländer wie China, Indien und Brasilien beinhalten. Wir erwarten auch, dass sich die Volatilität an den globalen Devisenmärkten im Geschäftsjahr 2011 fortsetzen wird. Da Siemens ein Nettoexporteur aus der Euro-Zone in den Rest der Welt ist, ist ein schwacher Euro grundsätzlich vorteilhaft für unser Geschäft. Durch die Optimierung unserer Produktionsstandorte während der vergangenen Jahre haben wir unsere natürliche Sicherung auf globaler Basis verbessert. Außerdem haben wir das verbleibende Wechselkursrisiko unseres Exportgeschäfts für das Geschäftsjahr 2011 bereits systematisch adressiert (siehe »Anhang zum Konzernabschluss«). Wir erwarten, dass diese Maßnahmen dazu beitragen werden, Ergebnismwirkungen aus Wechselkursschwankungen im Geschäftsjahr 2011 zu vermindern.

Eines unserer wichtigsten Ziele ist die Steigerung der Kapitaleffizienz von Siemens, die wir über die **angepasste Kapitalrendite (ROCE [angepasst])** messen. Ausgehend von unseren Erwartungen für kapitaleffizientes Wachstum unserer Geschäfte sowie kontinuierliche Verbesserungen im Verhältnis zum Markt und zu den Wettbewerbern, erwarten wir, dass die angepasste Kapitalrendite in den nächsten beiden Geschäftsjahren 2011 und 2012 innerhalb unseres Zielkorridors von 15 bis 20 % liegen wird. Mit Beginn von One Siemens haben wir unsere Berechnung der angepassten Kapitalrendite weiterentwickelt. Für weitere Informationen siehe »Geschäft und Rahmenbedingungen – Finanzielle Steuerungsgrößen – One Siemens« sowie »Weitere Informationen zu zusätzlichen Finanzkennzahlen«.

Wir beabsichtigen vorzuschlagen, jeweils zwischen 30 und 50 % vom in den nächsten zwei Geschäftsjahren erzielten Gewinn nach Steuern in Form von Dividendenzahlungen an die Aktionäre der Siemens AG auszuschütten. Die Berechnung wird außergewöhnliche zahlungsunwirksame Effekte im Ergebnis berücksichtigen. Wir beabsichtigen, die Dividendenzahlungen aus dem Free Cash Flow zu leisten.

## Finanzlage

Nach dem beispiellosen Niveau des **Free Cash Flow** im Geschäftsjahr 2010 erwarten wir, dass der Free Cash Flow im Geschäftsjahr 2011 durch Zahlungsmittelabflüsse für Forschungs- und Entwicklungskosten sowie für Vertriebs- und allgemeine Verwaltungskosten in Verbindung mit dem oben genannten Wachstum, durch erhebliche Zahlungsmittelabflüsse für Immaterielle Vermögenswerte und Sachanlagen sowie wesentliche personalbezogene Zahlungsmittelabflüsse in Zusammenhang mit zuvor genannten Personalanpassungsmaßnahmen und der Sondervergütung, deren Aufwand im Geschäftsjahr 2010 erfasst wurde, belastet wird. Wir erwarten, dass die Entwicklung des Free Cash Flow im Geschäftsjahr 2012 vom Umsatzwachstum und von der Ergebnisentwicklung beeinflusst werden wird.

Wir beabsichtigen, unseren Fokus auf die Steuerung des Nettoumlaufvermögens als einen wichtigen Faktor des Mittelzuflusses aus laufender Geschäftstätigkeit und auf Investitionen in Immaterielle Vermögenswerte und Sachanlagen beim Mittelabfluss aus Investitionstätigkeit beizubehalten. Sowohl für das Nettoumlaufvermögen als auch die Investitionen (Investitionen in Immaterielle Vermögenswerte und Sachanlagen) berücksichtigen wir das makroökonomische Umfeld sowie das Wachstum unseres Auftragseingangs. Bei den Investitionen streben wir für die Sektoren ein Verhältnis der Investitionen in Immaterielle Vermögenswerte und Sachanlagen zu Abschreibungen in einer Bandbreite von 95 bis 115 % an. Wir werden unseren strengen Genehmigungsprozess für Investitionen, der bis zur Vorstandsebene reicht, beibehalten. In Vorbereitung auf künftiges Wachstum beabsichtigen wir, unsere Investitionen im Geschäftsjahr 2011, insbesondere bei Industry und Energy, zu erhöhen.

Im Rahmen der **Investitionsplanung** beabsichtigen wir, weiterhin in unsere etablierten Märkte zu investieren, zum Beispiel in die Sicherung von Marktanteilen und in auf technische Innovationen basierende Wettbewerbsvorteile. Wir wollen auch weiter in Schwellenländer investieren, beispielsweise in Kapazitätserweiterungen für die Konstruktion, Fertigung und den Vertrieb neuer Lösungen in diesen Märkten. Auf Sektorebene beabsichtigt Industry, in Kapazitätserweiterungen und technische Innovationen zu investieren, insbesondere in Verbindung mit energiesparenden LED- und OLED-Technologien. Der Sektor erwartet, dass Investitionen in energiesparende Lösungen einen wachsenden Anteil seiner Investitionen in Schwellenländern einnehmen werden. Der Sektor

Energy plant Investitionen insbesondere in den technologiegetriebenen Windkraftmarkt und in großen Schwellenmärkten, beispielsweise Indien. Der Sektor Healthcare hat eine stringente Investitionskontrolle. Die Investitionsschwerpunkte werden die Entwicklung von Software und IT-Lösungen bleiben.

Mit unserer Fähigkeit, Mittelzuflüsse aus laufender Geschäftstätigkeit zu generieren, unseren liquiden Mitteln von insgesamt 14,4 Mrd. EUR, mit ungezogenen Kreditlinien von 6,3 Mrd. EUR und mit dem Kreditrating am Geschäftsjahresende sind wir der Überzeugung, dass wir ausreichend Flexibilität besitzen, um unsere Kapitalerfordernisse inklusive der planmäßigen Bedienung unserer Finanzschulden, die regelmäßigen Investitionen, die laufende Finanzierung der operativen Geschäftstätigkeit sowie das SFS-Finanzierungsgeschäft, die Dividendenzahlungen, die Finanzierung der Pensionspläne und die Portfolioaktivitäten zu decken. Wir sind außerdem der Überzeugung, dass das Umlaufvermögen für die derzeitigen Erfordernisse des Unternehmens ausreichend ist.

Unser Bekenntnis zu einem starken Finanzprofil beinhaltet eine konservative **Kapitalstruktur**. Dabei streben wir mittelfristig eine Bandbreite des Verhältnisses der angepassten industriellen Nettoverschuldung zum angepassten EBITDA von 0,5 bis 1,0 an.

### Segmententwicklung

Wie für den Konzern, gehen wir bei den Prognosen für die Segmente von den oben beschriebenen Erwartungen zur allgemeinen Wirtschaftsentwicklung sowie zu den spezifischen Branchenentwicklungen für die nächsten beiden Geschäftsjahre aus. Aufgrund dieser Annahmen sowie unseres unter One Siemens definierten Ziels, die Leistung unserer relevanten Wettbewerber zu übertreffen, gehen wir von einem Umsatzwachstum in den Geschäftsjahren 2011 und 2012 aus. Ebenfalls als Bestandteil von One Siemens haben wir angepasste EBITDA-Margenkorridore für die jeweiligen Branchen unserer drei Sektoren über den jeweiligen gesamten Geschäftszyklus festgelegt. Diese Margenkorridore liegen bei 10 bis 15% für unsere Sektoren Industry und Energy. Für den Sektor Healthcare liegt der Margenkorridor bei 15 bis 20%. Für unser Finanzdienstleistungsgeschäft **SFS** liegt der Zielkorridor für die Eigenkapitalrendite bei 15 bis 20%. Wir erwarten, dass die Ergebnisse unserer Sektoren und SFS im Geschäftsjahr 2011 und 2012 innerhalb der jeweiligen Korridore liegen werden. Insbesondere erwarten wir, dass das Ergebnis im Geschäftsjahr 2011 den Verkauf des von Energy gehaltenen Anteils an Areva NP enthalten wird.

Für das Ergebnis der **Equity Investments** erwarten wir auch für die beiden nächsten Geschäftsjahre 2011 und 2012 eine volatile Entwicklung. Die Restrukturierungsmaßnahmen bei NSN dauern an und werden voraussichtlich das Ergebnis von Equity Investments erheblich beeinflussen. Die Entwicklung bei NSN könnte durch die Integration des Mobilfunkinfrastrukturgeschäfts von Motorola, dessen Erwerb in den kommenden Monaten abgeschlossen sein sollte, beeinflusst werden.

Die im Geschäftsjahr 2010 initiierten Maßnahmen zur Verbesserung der Wettbewerbsfähigkeit von **Siemens IT Solutions and Services** werden im Geschäftsjahr 2011 umgesetzt. Wir erwarten zwar eine deutliche Ergebnisverbesserung gegenüber dem Verlust im Geschäftsjahr 2010, gehen aber nicht davon aus, dass das Geschäft innerhalb des Prognosezeitraums branchenübliche Ergebnisse erzielen kann.

Wir erwarten, dass Aktivitäten auf zentraler Ebene in Zusammenhang mit der Aufstellung von Siemens IT Solutions and Services als rechtlich selbstständiges, eigenständig agierendes 100%iges Tochterunternehmen von Siemens im Geschäftsjahr 2011 zu erheblichen Belastungen führen werden. Diese Belastungen werden in den **Zentralen Posten** berichtet werden. In den Zentralen Posten wurden im Geschäftsjahr 2010, wie bereits erwähnt, Aufwendungen in Höhe von 310 Mio. EUR aufgrund einer Sondervergütung für alle Mitarbeiter, die nicht dem oberen Management angehören, erfasst. Nachdem die Aufteilung dieser Sondervergütung im ersten Quartal des Geschäftsjahrs 2011 ermittelt worden ist, werden die Aufwendungen im Geschäftsjahr 2011, überwiegend auf die Sektoren verteilt. Mit Beginn des Geschäftsjahrs 2011 werden zentrale Infrastrukturkosten, die bis einschließlich Geschäftsjahr 2010 in den Zentralen Posten berichtet wurden, vorwiegend den Sektoren zugeordnet. Finanzdaten werden auf vergleichbarer Basis berichtet werden. So werden die vergleichbaren Werte für das Geschäftsjahr 2010 beispielsweise eine Zuordnung zentraler Infrastrukturkosten von 585 Mio. EUR ausweisen.

### Gesamtaussage zur voraussichtlichen Entwicklung

Mit einer anhaltenden Verbesserung an den Märkten von Siemens rechnen wir mit einem organisch deutlich steigenden Auftragseingang im Vergleich zum Geschäftsjahr 2010. Auch unterstützt durch unseren bereits hohen Auftragsbestand erwarten wir im Geschäftsjahr 2011 eine Rückkehr zu einem moderaten organischen Umsatzwachstum. Wir rechnen zudem damit, dass der Gewinn aus fortgeführten Aktivitäten im Geschäftsjahr 2011 den berichteten Wert des Ge-

schäftsjahrs 2010 um mindestens 25 bis 35 % übertreffen wird. Von dieser Prognose sind Effekte ausgenommen, die sich aus rechtlichen und regulatorischen Themen ergeben können. Ausgehend von unseren Erwartungen für kapitaleffizientes Wachstum unserer Geschäfte sowie kontinuierliche Verbesserungen im Verhältnis zum Markt und zu den Wettbewerbern, rechnen wir damit, dass die angepasste Kapitalrendite (ROCE [angepasst]) sowohl im Geschäftsjahr 2011 als auch im Geschäftsjahr 2012 innerhalb des Zielkorridors von 15 bis 20 % liegen wird.

Die tatsächliche Entwicklung von Siemens und unseren Segmenten kann aufgrund der mit einer Reihe von oben genannten Faktoren verbundenen Ungewissheiten – insbesondere der Erholung der Weltwirtschaft, der angenommenen Marktentwicklung, begrenzter Effekte in Verbindung mit Währungen und dem Fortschritt bei der Umsetzung unseres hohen Auftragsbestands in Umsatz – sowie aufgrund der unten beschriebenen Risiken und Chancen sowohl positiv als auch negativ von unseren Prognosen abweichen (siehe hierzu »– Risiken« sowie »– Chancen«). Dieser Prognosebericht sollte in Verbindung mit den Ausschlussklauseln am Ende dieses Zusammengefassten Lageberichts gelesen werden.

## RISIKOMANAGEMENT

Unsere Risikopolitik entspricht unserem Bestreben, nachhaltig zu wachsen und den Unternehmenswert zu steigern, wobei wir versuchen, unangemessene Risiken zu steuern beziehungsweise weitestgehend zu vermeiden. Da das Risikomanagement ein integraler Bestandteil der Planung und Umsetzung unserer Geschäftsstrategien ist, wird unsere Risikopolitik durch den Vorstand vorgegeben. Entsprechend der Organisations- und Verantwortungshierarchie bei Siemens ist das jeweilige Management unserer Sektoren, Sektorübergreifenden Geschäfte, regionalen Cluster und Zentralabteilungen verpflichtet, ein Risikomanagementsystem zu implementieren, das auf sein spezifisches Geschäft und seine Verantwortlichkeiten zugeschnitten ist und dabei den durch den Vorstand vorgegebenen, übergreifenden Grundsätzen entspricht.

Wir bedienen uns einer Reihe aufeinander abgestimmter Risikomanagement- und Kontrollsysteme, die uns unterstützen, Entwicklungen, die den Fortbestand von Siemens gefährden, frühzeitig zu erkennen. Besonderes Gewicht haben dabei unsere konzernweiten Prozesse für die strategische Unternehmensplanung und für das interne Berichtswesen. Die strategische Unternehmensplanung soll uns helfen, potenzielle Risiken lange vor wesentlichen Geschäftsentscheidungen ab-

zuschätzen. Das interne Berichtswesen dagegen ermöglicht es uns, solche Risiken im Geschäftsverlauf genauer zu überwachen. Unsere interne Revision überprüft in regelmäßigen Zeitabständen die Angemessenheit und Effektivität unseres Risikomanagementsystems. So können, falls Mängel aufgedeckt werden, geeignete Maßnahmen zu deren Beseitigung initiiert werden. Auf diese Weise wollen wir sicherstellen, dass Vorstand und Aufsichtsrat vollständig und zeitnah über wesentliche Risiken informiert werden.

Das Risikomanagementsystem von Siemens basiert auf einem umfassenden, interaktiven und managementorientierten Enterprise-Risk-Management-(ERM-)Ansatz, der in die Unternehmensorganisation integriert ist und sich sowohl mit Risiken als auch mit Chancen befasst. Unser ERM-Ansatz basiert dabei auf einem weltweit anerkannten Rahmenwerk, dem vom »Committee of Sponsoring Organizations of the Treadway Commission (COSO)« entwickelten »Enterprise Risk Management – Integrated Framework«. Das Rahmenwerk verknüpft den ERM-Prozess mit der konzernweiten Finanzberichterstattung und ist ein integrierter Bestandteil des internen Kontrollsystems. Es umfasst gleichermaßen die Aspekte Unternehmensstrategie, Effizienz und Effektivität der operativen Geschäftsaktivitäten, die Verlässlichkeit der Finanzberichterstattung wie auch die Einhaltung maßgeblicher Gesetze und Regelungen.

Der ERM-Prozess zielt ab auf eine frühzeitige Identifizierung, Bewertung und Steuerung jener Risiken und Chancen, die das Erreichen der strategischen, operativen, finanziellen und Compliance-bezogenen Ziele des Unternehmens in wesentlichem Maß beeinflussen können. Unser ERM-Ansatz basiert auf einem Netto-Prinzip, bei dem Risiken und Chancen unter Berücksichtigung der vorhandenen internen Kontrollen bewertet werden. Um einen umfassenden Blick auf unsere Geschäftsaktivitäten zu ermöglichen, werden Risiken und Chancen in einem strukturierten Prozess identifiziert, der Elemente eines Top-down- und Bottom-up-Ansatzes kombiniert. Die Berichterstattung von Risiken und Chancen erfolgt grundsätzlich quartalsweise, wobei der reguläre Berichterstattungsprozess durch eine Ad-hoc-Berichterstattung ergänzt wird, um kritische Themen rechtzeitig zu eskalieren. Relevante Risiken und Chancen werden aus quantitativer und/oder qualitativer Perspektive nach Eintrittshöhe und Eintrittswahrscheinlichkeit priorisiert. Dieser Bottom-up-Identifizierungs- und -Bewertungsprozess wird durch Workshops mit dem jeweiligen Management der Sektoren, Sektorübergreifenden Geschäfte, regionalen Cluster und Zentralfunktionen unterstützt. Dieses Top-down-Element stellt sicher, dass potenziel-



## Ablauf- und Aufbauorganisation des Enterprise-Risk-Management-(ERM-)Prozesses

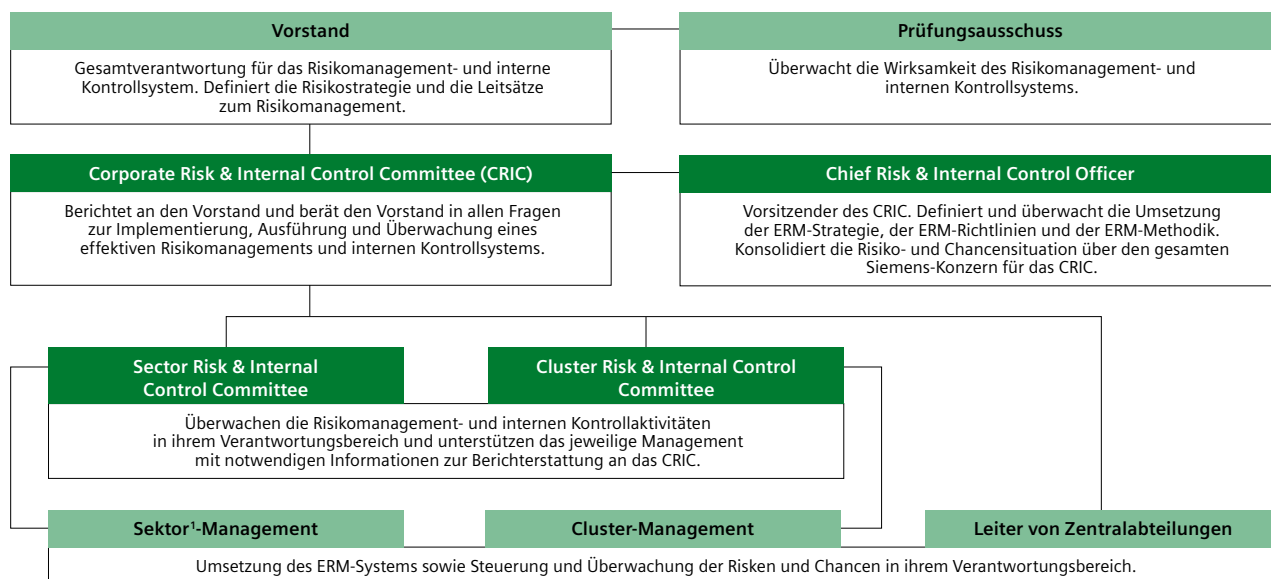

1 Der Begriff Sektor umfasst in dieser Übersicht die Sektoren, sektorübergreifenden Geschäfte sowie SRE.

le neue Risiken und Chancen auf Managementebene zur Diskussion gestellt und bei Relevanz in die Folgeberichterstattung aufgenommen werden. Die berichteten Risiken und Chancen werden nach möglichen kumulativen Effekten analysiert und auf Ebene der Sektoren, sektorübergreifenden Geschäfte, regionalen Cluster und Zentralfunktionen aggregiert.

Für alle relevanten Risiken und Chancen werden Verantwortlichkeiten festgelegt. Dabei hängt die hierarchische Ebene der Verantwortlichkeit von der Bedeutung des jeweiligen Risikos beziehungsweise der jeweiligen Chance ab. In einem ersten Schritt erfordert die Übernahme der Verantwortung für ein spezifisches Risiko oder eine spezifische Chance die Festlegung einer beziehungsweise die Kombination mehrerer unserer allgemeinen Reaktionsstrategien. Bezogen auf Risiken, umfassen unsere Strategien die folgenden Alternativen: sie zu vermeiden, sie zu übertragen, sie zu vermindern oder sie zu akzeptieren. Hinsichtlich der Chancen sehen unsere Reaktionsstrategien die folgenden Alternativen vor: sie nicht zu realisieren, sie zu übertragen oder sie teilweise oder vollständig zu verwirklichen. In einem zweiten Schritt beinhaltet die Risiko- beziehungsweise Chancenverantwortung auch die Entwicklung, Initiierung und Überwachung angemessener Reaktionsmaßnahmen entsprechend der gewählten Strategie. Um eine effektive Risikosteuerung zu ermöglichen, müssen diese

Reaktionsmaßnahmen spezifisch zugeschnitten sein. Aus diesem Grund haben wir eine Vielzahl von Reaktionsmaßnahmen mit unterschiedlichen Ausprägungen entwickelt: So versuchen wir zum Beispiel, das Risiko aus Zins- und Wechselkursschwankungen durch den Abschluss von entsprechenden Sicherungsgeschäften zu verringern. Bezüglich unserer Langzeitprojekte soll uns unter anderem ein systematisches und umfassendes Projektmanagement mit standardisierten Projektmeilensteinen, einschließlich vorläufiger Abnahmen während der Projektabwicklung, sowie mit klar festgelegten Genehmigungsprozessen dabei unterstützen, mögliche Projektrisiken, auch vor Angebotsabgabe, frühzeitig zu erkennen und diesen durch gezielte Maßnahmen zu begegnen. Des Weiteren haben wir für potenzielle Schadensfälle und Haftungsrisiken angemessene Versicherungen abgeschlossen, um unseren Gefährdungsgrad zu vermindern und mögliche Verluste zu vermeiden beziehungsweise zu minimieren. Dem Risiko von Konjunktur- und Nachfrageschwankungen begegnen wir unter anderem dadurch, dass wir die Entwicklung der gesamtwirtschaftlichen Rahmenbedingungen sowie der für uns wichtigen Branchen genau beobachten und bei Notwendigkeit frühzeitig und konsequent mit der Anpassung unserer Kapazitäten sowie der Initiierung von Einsparmaßnahmen reagieren.

Zur Überwachung des ERM-Prozesses und um die Integration und Vereinheitlichung bestehender Kontrollaktivitäten in Einklang mit den rechtlichen und operativen Anforderungen weiter voranzutreiben, hat der Vorstand eine vom Chief Risk & Internal Control Officer geleitete und für Risikomanagement und das interne Kontrollsystem verantwortliche Zentralabteilung (Corporate Risk and Internal Control Department) sowie das Corporate Risk and Internal Control Committee (CRIC) etabliert. Dem CRIC werden Informationen zu Risiken und Chancen aus den Risikokomitees berichtet, die innerhalb der Sektoren, Sektorübergreifenden Geschäfte und regionalen Cluster etabliert sind, sowie von den Leitern der Zentralabteilungen. Diese Informationen dienen zur Evaluierung der unternehmensweiten Risiko- und Chancensituation. Das CRIC berichtet an den Vorstand und unterstützt ihn bei der Umsetzung, Durchführung und Überwachung des Risikomanagement- und internen Kontrollsystems sowie bei der Berichterstattung an den Prüfungsausschuss des Aufsichtsrats. Das CRIC setzt sich aus dem Chief Risk & Internal Control Officer, als Vorsitzendem, und Mitgliedern des oberen Führungskreises, wie den CEOs unserer Sektoren und Sektorübergreifenden Geschäfte, dem CFO von Siemens sowie ausgewählten Leitern von Zentralabteilungen zusammen.

Nachfolgend beschreiben wir Risiken, die erhebliche nachteilige Auswirkungen auf unsere Vermögens-, Finanz- und Ertragslage, unseren Aktienkurs beziehungsweise den Preis unserer American Depositary Shares (ADS) sowie unsere Reputation haben können. Die Reihenfolge der dargestellten Risiken innerhalb der einzelnen Kategorien spiegelt die gegenwärtige Einschätzung des relativen Risikomaßes für Siemens wider und bietet daher einen Anhaltspunkt für die gegenwärtige Bedeutung dieser Risiken für uns. Dabei ist zu beachten, dass Risiken mit einem gegenwärtig niedriger eingeschätzten Risikomaß potenziell eine höhere Schadenswirkung auf Siemens haben können als Risiken mit einem gegenwärtig höher eingeschätzten Risikomaß. Zusätzliche Risiken, die uns derzeit noch nicht bekannt sind, oder Risiken, die wir jetzt noch als unwesentlich einschätzen, können unsere Geschäftsaktivitäten ebenfalls beeinträchtigen. Wir erwarten keinen Eintritt von Risiken, die eigenständig oder in Kombination mit anderen Risiken den Fortbestand des Unternehmens gefährden könnten.

## RISIKEN

### Strategische Risiken

#### Wir agieren in sehr wettbewerbsintensiven Märkten, die Preisdruck und schnellen Veränderungen ausgesetzt sind:

Die weltweiten Märkte für unsere Produkte und Lösungen sind hinsichtlich Preisbildung, Produkt- und Servicequalität, Entwicklungs- und Einführungszeiten sowie Kundenservice und Finanzierungsbedingungen hochgradig wettbewerbsintensiv. In vielen unserer Geschäftsfelder sehen wir uns mit Preisdruck konfrontiert und sind oder könnten Nachfrage-rückgängen oder verlangsamtem Wachstum ausgesetzt sein. Diese Bedingungen könnten sich in Zeiten rückläufiger Investitionstätigkeit und Kundennachfrage noch weiter verschärfen. Wir sind mit starken Wettbewerbern konfrontiert, von denen einige in bestimmten Geschäftssegmenten größer sind und daher über umfangreichere Ressourcen verfügen könnten, sowie mit Wettbewerbern aus Schwellenländern, die eine günstigere Kostenstruktur als wir aufweisen könnten. Einige Branchen, in denen wir tätig sind, durchlaufen Konsolidierungen, die zu einer Stärkung unserer Wettbewerber sowie einer Veränderung unserer relativen Marktposition führen könnten. Bestimmte Wettbewerber könnten effektiver und schneller auf bestehende Marktchancen reagieren, was sich negativ auf unsere Marktanteile auswirken könnte. Diese Faktoren könnten für sich allein oder in Kombination mit anderen Faktoren einen negativen Einfluss auf unsere Vermögens-, Finanz- und Ertragslage haben.

#### Unser Geschäft wird durch Unsicherheiten in den wirtschaftlichen und politischen Rahmenbedingungen beeinflusst, insbesondere durch das gegenwärtige makroökonomische Umfeld als Folge des zurückliegenden wirtschaftlichen Abschwungs und der Finanzkrise:

Unser Geschäftsumfeld wird durch die Rahmenbedingungen in den nationalen und weltweiten Volkswirtschaften beeinflusst. Im Geschäftsjahr 2010 verbesserten und stabilisierten sich einige Konjunktur- und Wirtschaftsindikatoren im Vergleich zum gesamtwirtschaftlichen Umfeld des Geschäftsjahrs 2009, das neben weiteren Auswirkungen insbesondere von einem starken Rückgang des Konsum- und Geschäftsklimas, gestiegener Erwerbslosigkeit sowie gesunkenen Investitionsausgaben geprägt war. Angesichts der jüngsten wirtschaftlichen Entwicklungen, der hohen Arbeitslosigkeit in bestimmten Ländern, des hohen Verschuldungsgrads der öffentlichen Haushalte in den USA sowie in Griechenland und anderen europäischen Ländern, der Unsicherheit hinsichtlich der Stabilität der chinesischen Wirtschaft sowie der potenziellen Auswirkungen

von Maßnahmen zur Konsolidierung der öffentlichen Haushalte durch Regierungen in aller Welt besteht keine Gewissheit darüber, dass die Erholung umfassend und nachhaltig ist, und es ist unklar, wie sie sich auf die für uns relevanten Märkte auswirken wird. Im Allgemeinen besteht aufgrund des signifikanten Anteils langzyklischer Geschäfte in unseren Sektoren sowie der Bedeutung von Langzeitverträgen für Siemens eine zeitliche Verzögerung zwischen den makroökonomischen Entwicklungen und deren Auswirkungen auf unsere Finanzzahlen. Ist die Erholung nur vorübergehend und sollten wir nicht erfolgreich unsere Produktions- und Kostenstrukturen an das gegenwärtige Marktumfeld anpassen können, kann nicht garantiert werden, dass dies keine weiteren wesentlichen negativen Auswirkungen auf unsere Vermögens-, Finanz- und Ertragslage sowie auf unsere Fähigkeit, Kapital aufzunehmen, haben wird. Beispielsweise könnten sich die Finanzierungsmöglichkeiten unserer Kunden verschlechtern, was zur Folge haben kann, dass sich Kaufabsichten bezüglich unserer Produkte und Dienstleistungen ändern, verzögern oder Transaktionen nicht durchgeführt werden. Zudem könnten Preise infolge ungünstiger Marktbedingungen stärker fallen, als dies gegenwärtig vorhergesehen wird. Des Weiteren könnten sich vertraglich festgelegte Zahlungsbedingungen, insbesondere hinsichtlich der Höhe an uns geleisteter Kundenanzahlungen im Rahmen von Langzeitprojekten, nachteilig verändern, was sich negativ auf unsere Zahlungsströme auswirken könnte. Zudem könnte eine unzureichende Umsatzgenerierung oder ein erschwerter Zugang zu den Kapitalmärkten bei unseren Kunden dazu führen, dass sie nicht in der Lage sind, ausstehende Rechnungen fristgerecht oder vollständig zu begleichen. Dadurch könnte unsere Vermögens-, Finanz- und Ertragslage negativ beeinflusst werden.

Zahlreiche andere Faktoren, wie Schwankungen bei den Energie- und Rohstoffpreisen sowie weltweite politische Konflikte, einschließlich der Situation im Nahen und Mittleren Osten und in anderen Regionen, wirken sich weiterhin auf makroökonomische Faktoren sowie die internationalen Kapital- und Kreditmärkte aus. Unsicherheiten hinsichtlich der wirtschaftlichen und politischen Bedingungen könnten unsere Beteiligungen sowie unsere Vermögens-, Finanz- und Ertragslage erheblich beeinträchtigen und unsere Planprozesse sowie unsere Prognosen erschweren.

Unsere Sektoren und Sektorübergreifenden Geschäfte sind einer Vielzahl von Marktbedingungen und Regulierungen ausgesetzt. So ist zum Beispiel unser Sektor Industry anfällig gegenüber ungünstigen Marktbedingungen in Segmenten der Automobilindustrie, des produzierenden Gewerbes sowie des

Baugewerbes. Unser Sektor Healthcare ist wiederum von Entwicklungen und Regulierungen in den weltweiten Gesundheitssystemen abhängig, insbesondere am wichtigen US-amerikanischen Gesundheitsmarkt. Schließlich ist unser Sektor Energy von der Entwicklung der globalen Energienachfrage abhängig und erheblich von Regulierungen in Bezug auf Energie- und Umweltpolitik betroffen.

**Unsere Geschäfte müssen mit den technologischen Veränderungen Schritt halten und neue Produkte und Dienstleistungen entwickeln, um wettbewerbsfähig zu bleiben:** Die Märkte, an denen wir agieren, sind infolge der Einführung innovativer Technologien rasanten und signifikanten Änderungen unterworfen. Um die Bedürfnisse unserer Kunden in diesen Bereichen zu erfüllen, müssen wir fortwährend neue Produkte und Dienstleistungen entwickeln, bestehende Produkte und Dienstleistungen verbessern sowie in die Entwicklung neuer Technologien investieren. Die Einführung neuer Produkte und Technologien erfordert ein starkes Engagement in der Forschung und Entwicklung, das mit einem signifikanten Einsatz finanzieller Mittel verbunden ist und nicht immer zwingend erfolgreich sein muss. Unsere Umsätze und Ergebnisse könnten negativ von Investitionen in solche Technologien beeinflusst werden, die nicht wie erwartet funktionieren oder integriert werden können, nicht die erwartete Marktakzeptanz finden oder, insbesondere im Vergleich zu unseren Wettbewerbern, nicht rechtzeitig – oder erst wenn sie obsolet geworden sind – am Markt eingeführt werden. Darüber hinaus könnte in einigen unserer Märkte die Notwendigkeit, neue Produkte rasch zu entwickeln und einzuführen, um sich ergebende Marktchancen nutzen zu können, zu Qualitätsproblemen führen. Unsere Geschäftsergebnisse hängen ganz wesentlich von unserer Fähigkeit ab, Änderungen an den Märkten zu antizipieren und uns an diese anzupassen sowie die Kosten für die Herstellung qualitativ hochwertiger neuer und bestehender Produkte zu senken. Sollte uns das nicht gelingen, könnte dies unsere Vermögens-, Finanz- und Ertragslage erheblich negativ beeinflussen.

**Unsere Vermögens-, Finanz- und Ertragslage könnte durch anhaltende strategische Neuausrichtungen und Kostensenkungsinitiativen negativ beeinflusst werden:** Wir befinden uns in einem fortwährenden Prozess strategischer Neuausrichtung und befassen uns laufend mit Kostensenkungsinitiativen. Diese können Kapazitätsanpassungsmaßnahmen sowie Initiativen zu strukturellen Verbesserungen beinhalten, zum Beispiel in unserem Sektorübergreifenden Geschäft Siemens IT Solutions and Services. Kapazitätsanpassungen durch die Zusammenführung von Geschäftsaktivitäten und

Fertigungsanlagen sowie Konsolidierungen in unserem Produktportfolio sind ebenfalls Bestandteil solcher Kostensenkungsinitiativen. Diese Maßnahmen könnten sich negativ auf unsere Vermögens-, Finanz- und Ertragslage auswirken. Jede künftige Wirkung aus diesen Programmen auf unsere Profitabilität wird durch die tatsächlich erzielten Einsparungen und unsere Fähigkeit, diese fortlaufenden Bemühungen nachhaltig umzusetzen, beeinflusst.

**Unsere Vermögens-, Finanz- und Ertragslage könnte durch Portfoliomaßnahmen negativ beeinflusst werden:** Unsere Strategie umfasst Desinvestitionen in einigen Geschäftsfeldern und die Stärkung anderer durch Portfoliomaßnahmen, einschließlich Unternehmenszusammenschlüssen und Akquisitionen.

Desinvestitionsmaßnahmen beinhalten das Risiko, bestimmte Geschäftsaktivitäten nicht wie geplant veräußern zu können. Außerdem könnten sich durch realisierte Desinvestitionen negative Auswirkungen auf unsere Vermögens-, Finanz- und Ertragslage sowie möglicherweise unsere Reputation ergeben.

Unternehmenszusammenschlüsse und Akquisitionen sind an sich riskant, da sie Risiken aus der Integration von Mitarbeitern, Prozessen, Technologien und Produkten beinhalten. Es kann nicht garantiert werden, dass jedes erworbene Geschäft erfolgreich und entsprechend dem ursprünglich vorgesehenen Zeitplan integriert werden kann oder sich nach der Integration erfolgreich entwickeln wird. Darüber hinaus können aus solchen Transaktionen erhebliche Akquisitions-, Verwaltungs- und sonstige Kosten entstehen, einschließlich Integrationskosten für erworbene Geschäftsaktivitäten. Zudem könnten Portfoliomaßnahmen einen zusätzlichen Finanzierungsbedarf zur Folge haben und unseren Verschuldungsgrad sowie die Finanzierungsstruktur nachteilig beeinflussen. Akquisitionen können auch zu einem signifikanten Anstieg der Immateriellen Vermögenswerte, einschließlich Geschäfts- und Firmenwerte, führen. Unsere Bilanz weist einen erheblichen Wert für Immaterielle Vermögenswerte, einschließlich Geschäfts- und Firmenwerte, aus. Dabei sind die den Divisionen Diagnostics und Imaging & IT des Sektors Healthcare sowie der Division Industry Automation des Sektors Industry zugewiesenen Geschäfts- und Firmenwerte am höchsten. Sollten wir anhaltend ungünstigen Geschäftsentwicklungen ausgesetzt sein, einschließlich nachteiliger Effekte auf unsere Umsätze und Ergebnisse sowie unsere Liquidität, oder ungünstigen Effekten aus einer Erhöhung der gewichteten durchschnittlichen Kapitalkosten (WACC) oder aus Wechselkursentwicklungen unterliegen oder anderweitig bei der

Durchführung von Akquisitionen nicht so erfolgreich sein wie ursprünglich erwartet, könnte dies weitere Wertberichtigungen auf diese Immateriellen Vermögenswerte, einschließlich Geschäfts- und Firmenwerte zum Beispiel bei der Division Diagnostics, zur Folge haben und unsere Ertragslage erheblich beeinträchtigen. Die Wahrscheinlichkeit solcher ungünstigen Geschäftsentwicklungen erhöht sich in Zeiten schwieriger oder unsicherer makroökonomischer Bedingungen. Beispielsweise wurden als Ergebnis einer im vierten Quartal des Geschäftsjahrs 2010 durchgeführten strategischen Überprüfung die mittelfristigen Wachstumsaussichten der Division Diagnostics und die langfristige Marktentwicklung des Labor diagnostikbereichs neu bewertet und als Folge die Geschäftsplanung der Division an die jetzt erwarteten geringeren Wachstumsaussichten angepasst. Der angepasste Geschäftsplan war die Basis für den jährlichen Werthaltigkeitstest (*Impairment Test*) des Geschäfts- und Firmenwerts im vierten Quartal des Geschäftsjahrs 2010. Dieser führte zu einer Wertminderung in Höhe von 1,145 Mrd. EUR auf den der Division Diagnostics zugewiesenen Geschäfts- und Firmenwert.

**Wir könnten durch unsere Equity-Beteiligungen und strategischen Allianzen negativ beeinflusst werden:** Unsere Strategie beinhaltet die Stärkung unserer Geschäfte durch Gemeinschaftsunternehmen (Joint Ventures), assoziierte Unternehmen und strategische Allianzen. Einige unserer Beteiligungen werden nach der Equity-Methode bilanziert, unter anderem NSN, EN, BSH und KMW. Alle Faktoren, die die Profitabilität unserer Equity-Beteiligungen negativ beeinflussen, einschließlich nachteiliger Effekte auf deren Umsätze, Ergebnisse sowie Liquidität, könnten unseren Ergebnisanteil aus diesen Equity-Beteiligungen beeinträchtigen oder zur Abschreibung dieser Beteiligungen führen. Außerdem könnte unsere Vermögens-, Finanz- und Ertragslage auch in Bezug auf Darlehen, Garantien oder die Nichteinhaltung von Nebenbestimmungen (Covenants) aus Kreditverträgen in Verbindung mit diesen Equity-Beteiligungen negativ beeinflusst werden. Zudem sind solche Beteiligungen an sich riskant, da es uns nicht möglich sein könnte, Prozesse der Unternehmensführung (*Corporate Governance*) oder Geschäftsentscheidungen unserer Equity-Beteiligungen und strategischen Allianzen ausreichend zu beeinflussen. Dies wiederum könnte sich negativ auf unser Geschäft auswirken. Zudem beinhalten Gemeinschaftsunternehmen Risiken aus der Integration von Mitarbeitern, Prozessen, Technologien und Produkten. Auch strategische Allianzen könnten für uns mit Risiken verbunden sein, da wir in einigen Geschäftsfeldern mit Unternehmen im Wettbewerb stehen, mit denen wir strategische Allianzen eingegangen sind.

### Operative Risiken

**Wir sind davon abhängig, hoch qualifizierte Führungskräfte und technisches Personal einzustellen und an uns zu binden:** Der Wettbewerb um hoch qualifizierte Führungskräfte und technisches Personal ist in den Branchen und Regionen, in denen unsere Sektoren und Sektorübergreifenden Geschäfte tätig sind, sehr intensiv, insbesondere in Zeiten der wirtschaftlichen Erholung. In vielen unserer Geschäftsfelder beabsichtigen wir, unsere Aktivitäten auszubauen. Hierfür werden wir hoch qualifizierte Mitarbeiter benötigen. Unser künftiger Erfolg hängt zum Teil davon ab, inwiefern es uns dauerhaft gelingt, Ingenieure und anderes Fachpersonal einzustellen, zu integrieren und dauerhaft an das Unternehmen zu binden. Es besteht keine Garantie, dass es uns auch weiterhin gelingen wird, all die hoch qualifizierten Mitarbeiter und Kompetenzträger (an den geeigneten Standorten) gewinnen und an uns binden zu können, die wir in Zukunft benötigen werden. Sollte uns dies nicht gelingen, könnte das erhebliche negative Auswirkungen auf unser Geschäft haben.

**Die gestiegenen Bedrohungen für die Informationssicherheit und ein höheres Maß an Professionalität in der Computerkriminalität bergen Risiken für unsere Informationssysteme, Netzwerke, Produkte, Lösungen und Dienstleistungen:** Wir beobachten einen weltweiten Anstieg von Bedrohungen für die Informationssicherheit und eine größere Professionalität in der Computerkriminalität. Dies führt zu Risiken in Bezug auf die Sicherheit unserer Informationssysteme und Netzwerke sowie zu Risiken hinsichtlich der Vertraulichkeit, Verfügbarkeit und Verlässlichkeit von Daten. Obgleich wir zur Risikominderung eine Reihe von Maßnahmen ergreifen, unter anderem die Schulung von Mitarbeitern, die umfassende Überwachung unserer Netzwerke und Informationssysteme oder die Vorhaltung von Sicherheits- und Schutzsystemen wie Firewalls und Virenschnellern, bleiben unsere Systeme, Netzwerke, Produkte, Lösungen und Dienstleistungen weiterhin potenziell anfällig gegenüber Angriffen. Abhängig von deren Natur und Ausmaß, können solche Angriffe potenziell zum Verlust von vertraulichen Informationen, zur unsachgemäßen Benutzung unserer Systeme und Netzwerke, zur Manipulation und zum Verlust von Daten, zu Produktfehlern sowie Produktionsausfällen und Lieferengpässen führen. Dies wiederum könnte negative Auswirkungen auf unsere Reputation, unsere Wettbewerbsfähigkeit und unsere Ertragslage haben.

**Wir könnten mit Störungen in unserer Versorgungskette, einschließlich der Unfähigkeit Dritter, Bauteile, Komponenten**

**oder Dienstleistungen fristgerecht zu liefern, konfrontiert sein und könnten Erhöhungen bei Rohstoffpreisen unterliegen:** Unsere finanzwirtschaftliche Leistungsfähigkeit hängt zum Teil von einer zuverlässigen und effektiven Steuerung unserer Versorgungskette (*Supply Chain Management*) für Bauteile, Komponenten und andere Materialien ab. Kapazitätsbeschränkungen und Lieferengpässe, die auf ein ineffektives Management der Versorgungskette zurückzuführen sind, könnten zu Zeitverzögerungen und zusätzlichen Kosten führen. Bei der Beschaffung von Komponenten, Vorprodukten und Dienstleistungen sind wir auf Fremdanbieter angewiesen. Die Herstellung, Montage und Funktionsprüfung unserer Produkte durch Dritte reduzieren unsere unmittelbaren Möglichkeiten der Einflussnahme auf Produktivität, Qualitätssicherung, Liefertermine und Kosten. Die Fremdanbieter, von denen wir Vorprodukte und Komponenten beziehen, haben außer uns noch weitere Kunden. Bei Auftreten einer Überschussnachfrage könnte es möglich sein, dass diese Anbieter nicht über hinreichende Kapazitäten verfügen, um den Bedarf aller Kunden, einschließlich Siemens, zu befriedigen. Verzögerungen bei der Belieferung mit Komponenten könnten die Leistungsstärke unserer Sektoren beeinträchtigen. Obwohl wir eng mit unseren Lieferanten zusammenarbeiten, um Versorgungsengpässe zu vermeiden, kann nicht garantiert werden, dass wir in Zukunft nicht in Versorgungsschwierigkeiten geraten oder dass wir in der Lage sein werden, einen nicht entsprechend unseren Anforderungen leistenden Zulieferer zu ersetzen. Dieses Risiko besteht insbesondere bei Geschäften mit einer sehr begrenzten Anzahl an Lieferanten. Engpässe oder Verzögerungen könnten unsere Geschäftsaktivitäten erheblich schädigen. Unerwartete Preissteigerungen von Komponenten aufgrund von Marktengpässen oder aus anderen Gründen könnten sich ebenfalls negativ auf die Leistungsstärke unserer Sektoren auswirken.

Unsere Sektoren beziehen Rohstoffe, einschließlich Kupfer, Stahl, Aluminium und Öl, und sind dadurch Schwankungen bei den Energie- und Rohstoffpreisen ausgesetzt. In letzter Zeit unterlagen Rohstoffe erheblichen Marktschwankungen, die wahrscheinlich andauern werden. Preissteigerungen könnten erhebliche negative Auswirkungen auf unsere Ertragslage haben, sofern es uns nicht möglich sein sollte, die gestiegenen Kosten zu kompensieren oder an unsere Kunden weiterzugeben. Umgekehrt könnten wir in Zeiten fallender Rohstoffpreise nicht vollständig von solchen Preisrückgängen profitieren, da wir generell versuchen, das Risiko von steigenden Rohstoffpreisen durch unterschiedliche Maßnahmen, zum Beispiel durch den Abschluss langfristiger Verträge oder



durch physische beziehungsweise finanzielle Sicherungsgeschäfte, zu vermindern. Zusammen mit dem Preisdruck, dem wir seitens unserer Kunden ausgesetzt sein könnten, da diese erwarten, von gesunkenen Rohstoffpreisen oder nachteiligen Marktbedingungen zu profitieren, könnte sich dies ebenfalls negativ auf unsere Ertragslage auswirken.

#### **Wir könnten mit operativen Störungen und Qualitätsproblemen in unserer Wertschöpfungskette konfrontiert sein:**

Unsere Wertschöpfungskette umfasst alle Stufen von Forschung und Entwicklung über Supply Chain Management und Produktion bis hin zu Marketing, Vertrieb und Dienstleistungen. Operative Störungen in unserer Wertschöpfungskette könnten zu Qualitätsproblemen sowie zu potenziellen Produkt-, Arbeitssicherheits- und regulatorischen sowie Umwelt Risiken führen. Solche Risiken könnten insbesondere in Verbindung mit unseren Produktionsanlagen auftreten, die auf der ganzen Welt angesiedelt sind und die eine hohe organisatorische und technische Komplexität aufweisen. Gelegentlich könnten Qualitätsprobleme bei von uns verkauften Produkten auftreten, die aus der Entwicklung oder Produktion dieser Produkte oder der in ihnen integrierten Software resultieren können. Solche operativen Störungen oder Qualitätsprobleme könnten unsere Vermögens-, Finanz- und Ertragslage erheblich negativ beeinflussen.

#### **Unsere Vermögens-, Finanz- und Ertragslage könnte durch Kostenüberschreitungen oder zusätzliche Zahlungsverpflichtungen in Bezug auf unser Geschäft mit Langfrist- und Festpreisprojekten beziehungsweise schlüsselfertigen Anlagen negativ beeinflusst werden:**

Langfristverträge, insbesondere für Großprojekte, bilden einen bedeutenden Bestandteil unseres Geschäfts. Solche Großprojekte werden in der Regel im Rahmen eines wettbewerbsintensiven Bieterverfahrens vergeben. Einige dieser Verträge sind an sich riskant, da sie die Übernahme von nahezu allen Risiken, die mit der Fertigstellung des Projekts verbunden sind, sowie von Gewährleistungsverpflichtungen nach Abnahme des Projekts vorsehen können. Zum Beispiel könnten wir mit dem Risiko konfrontiert sein, die technischen Anforderungen eines Projekts erfüllen zu müssen, ohne vor der Übernahme des Projekts Erfahrungen mit derartigen Anforderungen gesammelt zu haben. Die aus solchen Festpreisverträgen erzielbaren Ergebnismargen könnten durch Änderungen der Kosten oder der Produktivität während ihrer Laufzeit von den ursprünglichen Schätzungen abweichen. Manchmal tragen wir das Risiko unerwarteter Projektmodifikationen, des Mangels an qualifizierten Fachkräften, von Qualitätsproblemen, finanziellen

Schwierigkeiten unserer Kunden, Kostenüberschreitungen oder Vertragsstrafen aufgrund unerwarteter technischer Probleme, von unvorhersehbaren Entwicklungen an den Projektstandorten, von Leistungsproblemen bei unseren Zulieferern, Subunternehmern oder Konsortialpartnern oder aufgrund weiterer logistischer Schwierigkeiten. Eine Reihe unserer mehrjährigen Verträge umfasst zudem anspruchsvolle Anforderungen hinsichtlich Installation und Wartung zusätzlich zu weiteren Erfüllungskriterien wie Zeitvorgaben, Stückkosten und der Einhaltung gesetzlicher Bestimmungen. Diese Anforderungen könnten, wenn sie nicht erfüllt werden, erhebliche Vertragsstrafen, Schadensersatzpflichten, Zahlungsverweigerung oder Vertragskündigung nach sich ziehen. Wir können nicht garantieren, dass unsere Verträge und Projekte, insbesondere jene mit langer Laufzeit und Festpreiskalkulation, profitabel abgeschlossen werden können. Für weitere Informationen siehe »Anhang zum Konzernabschluss«.

#### **Finanzmarktrisiken**

**Wir sind Währungs- und Zinsrisiken ausgesetzt:** Wir sind Wechselkursschwankungen, insbesondere zwischen dem US-Dollar und dem Euro, ausgesetzt, da ein großer Anteil unseres Geschäftsvolumens in den USA und in Form von Exporten aus Europa generiert wird. Darüber hinaus unterliegen wir Währungseffekten bezüglich der Währungen der Schwellenländer, zum Beispiel China, Indien und Brasilien. Ein gegenüber dem US-Dollar und anderen Währungen starker Euro kann demnach großen Einfluss auf unseren Umsatz und unser Ergebnis haben. Bestimmte Währungs- wie auch Zinsrisiken sind konzernweit durch derivative Finanzinstrumente abgesichert. In Abhängigkeit von der Entwicklung von Wechselkursen könnten diese Sicherungsgeschäfte signifikanten Einfluss auf unsere Zahlungsströme haben. Unsere Sektoren und Sektorübergreifenden Geschäfte betreiben Währungssicherungen, die zum Teil nicht die Voraussetzungen für die Bilanzierung einer Sicherungsbeziehung (*Hedge Accounting*) erfüllen. Zusätzlich bestehen bei der Konzern-Treasury Zinssicherungsgeschäfte, die ebenfalls nicht die Voraussetzungen für die Bilanzierung einer Sicherungsbeziehung erfüllen und die Zinssatzänderungen unterworfen sind. Dies kann dazu führen, dass Wechselkurs- und Zinssatzschwankungen unsere Ergebnisse beeinflussen und zu Ergebnisvolatilität führen. Eine Aufwertung des Euro, insbesondere gegenüber dem US-Dollar, könnte zudem Einfluss auf die Wettbewerbsposition von Siemens haben, weil für einige unserer Wettbewerber bedeutende Kostenanteile in schwächeren Währungsräumen anfallen und sie dadurch Produkte zu günstigeren Preisen anbieten können.



**Wir sind Schwankungen der Kreditrisikoaufschläge (Credit Spreads) ausgesetzt:** In Bezug auf die Aktivitäten unserer Konzern-Treasury könnte die Erhöhung der Kreditrisikoaufschläge aufgrund von Unsicherheit und Risikoaversion an den Finanzmärkten zu einer Veränderung der Marktwerte unserer handelbaren Forderungen und derivativen Finanzinstrumente führen. Darüber hinaus besteht das Risiko, dass sich unsere Refinanzierungskosten erhöhen könnten, wenn sich die jüngste Erholung und Stabilisierung an den Finanzmärkten nicht fortsetzen sollte. Zusätzlich könnten die Kosten zur Sicherung von Kreditrisiken aufgrund potenziell höherer Kontrahentenrisiken steigen.

**Unsere künftige Finanzierung über die Konzern-Treasury könnte durch Unsicherheiten bei den wirtschaftlichen Rahmenbedingungen und der Entwicklung an den Bank- und Kapitalmärkten beeinflusst werden:** Unsere Konzern-Treasury ist für die Finanzierung unseres Unternehmens und unserer Sektoren und Sektorübergreifenden Geschäfte verantwortlich. Negative Entwicklungen an den Devisen-, Geld- und Kapitalmärkten, wie die begrenzte Verfügbarkeit von Finanzmitteln (insbesondere in US-Dollar), könnten unsere Gesamtfinanzierungskosten erhöhen. Die globale Finanzmarktkrise hat weltweite Auswirkungen auf die Kapitalmärkte gehabt. Diese Entwicklungen sowie das höhere Risikobewusstsein von Investoren und insbesondere von Regierungen könnten zu zusätzlichen, politisch motivierten Regulierungen des Finanzsektors führen, die sich auf unsere künftigen Möglichkeiten der Fremdkapitalbeschaffung auswirken und Kreditrisikoaufschläge deutlich erhöhen könnten. In Bezug auf die Aktivitäten unserer Konzern-Treasury könnten eine verschlechterte Bonität oder Zahlungsausfälle von Kontrahenten unsere Ergebnisse negativ beeinflussen.

**Eine Verschlechterung unserer Ratings könnte unsere Kapitalkosten erhöhen und sich negativ auf unsere Geschäfte auswirken:** Unsere Vermögens-, Finanz- und Ertragslage wird wesentlich durch die bereits erreichten und die erwarteten Ergebnisse unserer Sektoren und Sektorübergreifenden Geschäfte sowie durch Portfoliomaßnahmen beeinflusst. Eine bereits eingetretene oder erwartete Verschlechterung unserer Ertragslage oder unserer Zahlungsströme könnte ebenso wie der Anstieg unserer Nettoverschuldung zu einer Verschlechterung unserer Kreditratings führen. Herabstufungen durch die Ratingagenturen könnten unsere Kapitalkosten erhöhen, die verfügbare Investorenbasis verkleinern und unsere Geschäftsaktivitäten negativ beeinflussen.

**Durch unsere Finanzierungsaktivitäten sind wir unterschiedlichen Risiken, einschließlich Kredit-, Zins- und Wechselkursrisiken, ausgesetzt:** In Zusammenhang mit Großprojekten, einschließlich solcher des Sektors Energy, stellen wir unseren Kunden direkte und indirekte Finanzierungen in verschiedenen Ausprägungen zur Verfügung. Ebenso finanzieren wir eine Vielzahl kleinerer Kundenbestellungen, zum Beispiel über das Leasing medizinischer Geräte, das zum Teil über SFS erfolgt. Darüber hinaus ist SFS Kreditrisiken durch die Finanzierung von Produkten anderer Hersteller sowie über direkte und indirekte Beteiligungen an Finanzierungen, zum Beispiel syndizierten Krediten, ausgesetzt. Zum Teil stehen uns Verwertungsrechte an den von uns finanzierten Gegenständen zu, oder wir erhalten sonstige Sicherheiten. Wir könnten Verluste erleiden, falls sich die Bonität unserer Kunden verschlechtert oder falls Kunden uns nicht mehr bezahlen können, falls die Vermögenswerte, die wir als Sicherheiten verwenden, oder die sonstigen Sicherheiten Wertverluste erleiden, falls Zinssätze oder Fremdwährungskurse schwanken oder falls sich Projekte, in die wir investiert haben, als nicht erfolgreich erweisen. Mögliche Verschlechterungen der allgemeinen wirtschaftlichen Lage könnten zu einem weiteren Rückgang der Marktwerte finanzieller Vermögenswerte, einem deutlichen Anstieg der Kundenausfallraten sowie einem Wertverlust bei finanzierten Produkten und sonstigen Sicherheiten führen. Hieraus könnten sich Verluste ergeben, die sich negativ auf unsere Vermögens-, Finanz- und Ertragslage auswirken könnten.

**Unsere Vermögens-, Finanz- und Ertragslage könnte durch verschiedene Parameter, die Einfluss auf den Finanzierungsstatus unserer Pensionspläne haben, negativ beeinträchtigt werden:** Der Finanzierungsstatus unserer Pensionspläne kann sowohl durch einen Anstieg oder Rückgang des Anwartschaftsbarwerts der leistungsorientierten Verpflichtung (*Defined Benefit Obligation – DBO*) als auch durch einen Anstieg oder Rückgang im Wert des Fondsvermögens beeinflusst werden. Die Pensionsverpflichtungen werden in Übereinstimmung mit versicherungsmathematischen Bewertungen bilanziert. Diese Bewertungen beruhen auf statistischen und anderen Faktoren mit dem Ziel, künftige Ereignisse zu antizipieren. Die verwendeten Faktoren umfassen Schlüsselprämissen bei der Bewertung von Pensionsverpflichtungen wie den Abzinsungsfaktor, die erwartete Rendite des Fondsvermögens, den Gehaltstrend und den Rententrend. Die tatsächliche Entwicklung kann aufgrund sich ändernder Marktbedingungen oder sich ändernder wirtschaftlicher Bedingun-

gen von den Prämissen abweichen und hierdurch zu einem Anstieg oder Rückgang der DBO führen. Erhebliche Bewegungen an den Finanzmärkten oder eine Änderung in der Zusammensetzung des investierten Fondsvermögens können zu einem entsprechenden Anstieg oder Rückgang im Wert des Fondsvermögens, insbesondere bei Aktien, führen oder eine Änderung der Annahme der zu erwartenden Rendite des Fondsvermögens zur Folge haben. Änderungen der Annahmen bei der Bewertung von Pensionsplänen können außerdem den periodenbezogenen Nettopensionsaufwand beeinflussen. Zum Beispiel kann eine Änderung bei den Abzinsungsfaktoren oder der erwarteten Rendite des Fondsvermögens eine Änderung des periodenbezogenen Nettopensionsaufwands im folgenden Geschäftsjahr zur Folge haben. Zur Erfüllung lokaler Pensionsvorschriften in bestimmten Ländern könnten wir mit einem erhöhten Geldmittelabfluss konfrontiert sein, um eine mögliche Unterdeckung unserer Pensionspläne in diesen Ländern zu vermindern. Zum Ende des Geschäftsjahrs 2010 betrug die Unterdeckung im Finanzierungsstatus der wesentlichen Pensionszusagen von Siemens 6,4 Mrd. EUR, gegenüber einer Unterdeckung in Höhe von 4,0 Mrd. EUR zum Ende des Geschäftsjahrs 2009. Darüber hinaus wiesen die wesentlichen pensionsähnlichen Verpflichtungen am Ende des Geschäftsjahrs 2010 eine Unterdeckung von 0,7 Mrd. EUR aus, im Vergleich zu 0,6 Mrd. EUR am Ende des vorangegangenen Geschäftsjahrs. Die Rückstellungen für sonstige Zusagen für Pensionen und ähnliche Verpflichtungen beliefen sich zum Ende des Geschäftsjahrs 2010 auf 1,2 Mrd. EUR, im Vergleich zu 1,1 Mrd. EUR am Ende des vorangegangenen Geschäftsjahrs. Weitere Informationen finden sich im »Anhang zum Konzernabschluss«.

Weitere Informationen zu Finanzmarktrisiken und zum Management von Finanzrisiken finden sich im »Anhang zum Konzernabschluss«.

### Compliance-Risiken

**Wir sind regulatorischen Risiken in Zusammenhang mit unserer internationalen Geschäftstätigkeit ausgesetzt:** Protektionismus in der Handelspolitik und Änderungen im politischen und regulatorischen Umfeld an Märkten, an denen wir Geschäfte betreiben, wie Import- und Exportkontrollen, Zollbestimmungen oder andere Handelshemmnisse, sowie Preis- oder Devisenbeschränkungen könnten unsere Geschäfte an verschiedenen nationalen Märkten beeinflussen, unsere Umsätze und Profitabilität beeinträchtigen sowie die Rückführung von Gewinnen erschweren. Außerdem könnten wir

Strafzahlungen, Sanktionen und Reputationsschäden ausgesetzt sein. Darüber hinaus kann die Unsicherheit im rechtlichen Umfeld mancher Regionen die Möglichkeiten einschränken, unsere Rechte durchzusetzen. Beispielsweise unterhalten wir als global agierendes Unternehmen Geschäftsaktivitäten mit Kunden in Ländern, die Exportkontrollregulierungen, Embargos, Sanktionen oder anderen Formen von Handelsbeschränkungen unterliegen, die durch die USA, die Europäische Union oder andere Länder oder Organisationen auferlegt wurden. Geschäftsaktivitäten mit Kunden im Iran wurden vor Kurzem durch zusätzliche Bestimmungen, wie die Resolution 1929 (2010) des Sicherheitsrats der Vereinten Nationen, den am 1. Juli 2010 von den USA beschlossenen »Comprehensive Iran Sanctions, Accountability, and Divestment Act of 2010« sowie die von der Europäischen Union beschlossene »Verordnung (EU) Nr. 961/2010 des Rates vom 25. Oktober 2010 über restriktive Maßnahmen gegen Iran und zur Aufhebung der Verordnung (EG) Nr. 423/2007« noch deutlich stärker reglementiert. Obgleich wir beschlossen haben, generell keine Neuaufträge mehr mit Kunden im Iran abzuschließen, ist es im Rahmen unserer detaillierten Richtlinien, die diese generelle Vorgehensweise umsetzen, unter eingeschränkten Voraussetzungen weiterhin möglich, mit Kunden im Iran bestimmte Geschäftsaktivitäten zu tätigen, an diese Produkte zu liefern sowie Dienstleistungen zu erbringen. Detailliertere Informationen zu diesen Richtlinien finden sich im Abschnitt »Ertragslage – Eckdaten Siemens und Konzern-Gewinn- und Verlustrechnung«. Neue oder verschärfte Exportkontrollregulierungen, Sanktionen, Embargos oder andere Formen von Handelsbeschränkungen, die für den Iran oder andere sanktionierte Länder erlassen werden, in denen wir Geschäftsaktivitäten unterhalten, könnten zu einer Einschränkung unserer bestehenden Geschäftsaktivitäten in diesen Ländern sowie zu einer Anpassung unserer Richtlinien führen. Zusätzlich könnten wir durch die Beendigung unserer Geschäftsaktivitäten im Iran oder in anderen sanktionierten Ländern Ansprüchen unserer Kunden sowie weiteren Maßnahmen ausgesetzt sein. Derzeit prüfen wir die möglichen Auswirkungen der oben genannten Iran-bezogenen Bestimmungen, unter anderem in Bezug auf bereits existierende vertragliche Verpflichtungen aus dem Geschäft unseres Sektors Energy im Iran.

Wir erwarten, dass Umsätze in Schwellenländern durch die Entwicklung unseres Geschäfts und die steigende Nachfrage nach unseren Produkten und Lösungen aus solchen Ländern und Regionen einen zunehmenden Anteil an unserem Gesamtumsatz einnehmen werden. Bei Geschäftsaktivitäten in

Schwellenländern bestehen verschiedene Risiken wie Unruhen, Gesundheitsrisiken, kulturelle Unterschiede, zum Beispiel bei Arbeitsverhältnissen und Geschäftspraktiken, Volatilität des Bruttoinlandsprodukts, wirtschaftliche und staatliche Instabilität, die mögliche Verstaatlichung von Privatvermögen sowie die Auferlegung von Devisenbeschränkungen. Insbesondere die asiatischen Märkte sind für unsere langfristige Wachstumsstrategie von hoher Bedeutung, und unsere beträchtlichen Geschäftsaktivitäten in China werden dort von einem Rechtssystem beeinflusst, das sich noch entwickelt und Änderungen unterliegen kann. Unsere Wachstumsstrategie könnte durch staatliche Unterstützung der lokalen Industrie gehemmt werden. Unsere Sektoren und Sektorübergreifenden Geschäfte, insbesondere die, die ihre Umsätze mit Großprojekten erzielen, könnten negativ beeinflusst werden, wenn sich die künftige Nachfrage, die Preise und das Bruttoinlandsprodukt an den Märkten, an denen sie Geschäfte betreiben, nicht so positiv wie erwartet entwickeln. Sollten solche oder ähnliche Risiken aus unseren internationalen Geschäftsaktivitäten eintreten, könnten diese unsere Vermögens-, Finanz- und Ertragslage erheblich negativ beeinflussen.

**Staatsanwaltschaften und andere Behörden in Gerichtsbarkeiten weltweit untersuchen hinsichtlich unseres Unternehmens und einzelner aktueller und früherer Mitarbeiter Vorwürfe der Korruption und anderer Gesetzesverletzungen. Der Ausgang dieser und künftiger Untersuchungen könnte erhebliche nachteilige Auswirkungen auf die Entwicklung künftiger Geschäfte, die Vermögens-, Finanz- und Ertragslage des Unternehmens, den Aktienpreis, den Preis unserer American Depository Shares (ADS) und unsere Reputation haben:** Staatsanwaltschaften und andere Behörden in Gerichtsbarkeiten weltweit untersuchen in einer Reihe unserer ehemaligen Bereiche und Regionalgesellschaften den Vorwurf der Korruption. Zusätzlich zu den bereits laufenden Ermittlungen könnten in Zukunft weitere Ermittlungen von den Behörden dieser und anderer Gerichtsbarkeiten eingeleitet werden. Darüber hinaus könnten bereits laufende Ermittlungen ausgeweitet werden. Auf dieser Grundlage könnten Behörden gegen unser Unternehmen oder gegen einige unserer Mitarbeiter gerichtlich vorgehen. Es könnten weitere straf- oder zivilrechtliche Bußgelder verhängt werden. Darüber hinaus könnte es zu Strafen, Sanktionen, gerichtlichen Verfügungen bezüglich künftigen Verhaltens, Gewinnabschöpfungen, zum Ausschluss von der direkten oder indirekten Teilnahme an bestimmten Geschäften, zum Verlust

von Gewerbekonzessionen oder zu anderen Restriktionen kommen. Zusätzlich zu Geldstrafen und anderen Strafen könnten weitere Überwachungsinstanzen eingesetzt werden, die in der Zukunft unsere Geschäftspraktiken dahingehend überwachen, dass anzuwendende Gesetze eingehalten werden, und wir könnten auch in anderer Weise aufgefordert werden, unsere Geschäftspraktiken und unser Compliance-Programm zu modifizieren. Auch Steuerbehörden könnten bestimmte Maßnahmen verhängen, einschließlich potenzieller Steuerstrafen. Abhängig von der Entwicklung der Ermittlungen könnte es sich als erforderlich erweisen, dass wir für Strafen, Schadensersatz, Gewinnabschöpfungen oder ähnliche Forderungen diverser Behörden erhebliche Beträge bereitstellen müssen. Jede der oben genannten Maßnahmen könnte erhebliche nachteilige Auswirkungen auf die Vermögens-, Finanz- und Ertragslage des Unternehmens, den Aktienpreis (beziehungsweise den Preis unserer ADS) und unsere Reputation haben.

Wir führen weltweit in nicht unerheblichem Umfang Geschäfte mit öffentlichen Auftraggebern und staatlichen Unternehmen durch und sind ferner an Projekten beteiligt, die von Behörden oder von zwischenstaatlichen Organisationen wie multilateralen Entwicklungsbanken finanziert werden. Sollte festgestellt werden, dass wir oder unsere Tochtergesellschaften an gesetzeswidrigen Handlungen beteiligt waren oder gegen mutmaßliche oder erwiesene Fälle von Korruption in unserem Unternehmen keine effektiven Maßnahmen ergriffen haben, könnte sich dies auf unsere Beteiligung an Geschäften mit öffentlichen Auftraggebern oder zwischenstaatlichen Organisationen nachteilig auswirken und zu einem formellen Ausschluss von solchen Geschäften führen, was erhebliche nachteilige Auswirkungen auf unser Geschäft haben könnte. Zum Beispiel könnten wir aufgrund der Gesetzgebung in Mitgliedstaaten der Europäischen Union in bestimmten Fällen zwingend oder nach Ermessen von öffentlichen Aufträgen ausgeschlossen werden, wenn wir wegen Bestechung und bestimmter anderer Vergehen für schuldig befunden werden sollten. Wie im »Anhang zum Konzernabschluss« genauer beschrieben, wurden wir oder unsere Tochtergesellschaften in der Vergangenheit aufgrund von Feststellungen der Korruption oder anderen Fehlverhaltens von Geschäften mit öffentlichen Auftraggebern ausgeschlossen. Eine Verurteilung wegen gesetzeswidrigen Verhaltens oder der Ausschluss von der Beteiligung an Geschäften mit öffentlichen Auftraggebern oder zwischenstaatlichen Organisationen in einer Rechtsord-

nung könnte einen entsprechenden Ausschluss in anderen Rechtsordnungen oder durch andere zwischenstaatliche Organisationen nach sich ziehen. Selbst wenn wir nicht formell von der Beteiligung an Geschäften mit öffentlichen Auftraggebern ausgeschlossen werden, könnten Behörden oder zwischenstaatliche Organisationen uns informell von der Teilnahme an Ausschreibungen oder von der Beteiligung an bestimmten Verträgen ausschließen. Gelegentlich haben öffentliche Auftraggeber oder zwischenstaatliche Organisationen in ihrer Rolle als Kunden unseres Unternehmens von uns Informationen bezüglich der oben genannten Ermittlungen erfragt und uns zu einer Stellungnahme aufgefordert. Wir gehen davon aus, dass wir auch künftig derartige Anfragen erhalten werden.

Unsere Verwicklung in bestehende und potenzielle Korruptionsverfahren könnte unserer Reputation schaden und nachteilige Auswirkungen auf unser Bemühen haben, uns um Geschäfte mit Kunden sowohl des öffentlichen als auch des privaten Sektors zu bewerben. Die Ermittlungen könnten sich auch auf unsere Beziehungen zu Geschäftspartnern, von denen wir abhängen, sowie auf unsere Fähigkeit, neue Geschäftspartner zu finden, nachteilig auswirken. Sie könnten sich ferner nachteilig auf unsere Fähigkeit auswirken, strategische Projekte und Transaktionen zu verfolgen, die für unser Geschäft wichtig sein könnten, wie strategische Allianzen, Joint Ventures oder andere Formen der geschäftlichen Zusammenarbeit. Laufende oder mögliche künftige Ermittlungen könnten zur Aufhebung einiger unserer bestehenden Verträge führen, und Dritte, einschließlich unserer Mitbewerber, könnten gegen uns in erheblichem Umfang Verfahren einleiten.

Zahlreiche der behördlichen Ermittlungen dauern zum gegenwärtigen Zeitpunkt noch an, und es ist noch nicht absehbar, wann und mit welchen Ergebnissen sie zum Abschluss gebracht werden und welche potenziellen Auswirkungen ihre Ergebnisse sowie die Reaktionen Dritter auf diese Ergebnisse auf unser Geschäft haben werden. Künftige Entwicklungen bei diesen Ermittlungen, die Reaktion auf behördliche Forderungen und die Zusammenarbeit mit den Behörden, insbesondere wenn wir nicht in der Lage sind, diese Untersuchungen in einem angemessenen Zeitrahmen zum Abschluss zu bringen, könnten die Konzentration und die Ressourcen des Managements von anderen Angelegenheiten ablenken, denen sich das Unternehmen widmen muss. Wir haben ein weltweites Compliance-Programm implementiert, um Compliance-

Risiken zu verhindern und auf diese zu reagieren, und wir arbeiten kontinuierlich mit Unterstützung unserer weltweiten Compliance-Organisation daran, die Effektivität und Effizienz dieses Programms zu verbessern.

**Untersuchungen von Finanzbehörden sowie Veränderungen in den steuerlichen Gesetzen und Regelungen könnten unsere Vermögens-, Finanz- und Ertragslage negativ beeinflussen:** Wir sind in rund 190 Ländern tätig und unterliegen damit vielfältigen steuerlichen Gesetzen und Regelungen. Änderungen der steuerlichen Gesetze und Regelungen können zu einem höheren Steueraufwand und zu höheren Steuerzahlungen führen. Außerdem können Änderungen der steuerlichen Gesetze und Regelungen auch Einfluss auf unsere Steuerforderungen und Steuerverbindlichkeiten sowie auf unsere aktiven und passiven latenten Steuern haben. Zudem kann die Unsicherheit im steuerlichen Umfeld mancher Regionen die Möglichkeiten einschränken, unsere Rechte durchzusetzen. Als global tätiges Unternehmen agieren wir auch in Ländern mit komplexen steuerlichen Regelungen, die unterschiedlich ausgelegt werden könnten. Künftige Auslegungen und Entwicklungen steuerlicher Gesetze und Regelungen könnten unsere Steuerverbindlichkeiten, unsere Rentabilität und unseren Geschäftsbetrieb beeinflussen. Wir werden regelmäßig von den Finanzbehörden in verschiedenen Jurisdiktionen geprüft.

**Unser Geschäft könnte durch laufende oder künftige Rechtsstreitigkeiten beeinträchtigt werden:** Wir sind zahlreichen Risiken aus Rechtsstreitigkeiten oder staatlichen und behördlichen Verfahren ausgesetzt, an denen wir aktuell beteiligt sind oder die sich in der Zukunft ergeben könnten. Wir sind regelmäßig an Rechtsstreitigkeiten und/oder ähnlichen Verfahren beteiligt und unterliegen staatlichen Untersuchungen und Verfahren, unter anderem Schiedsanträgen, Verfahren bezüglich des Vorwurfs der nicht vertragsgemäßen Lieferung von Waren oder Dienstleistungen, der Produkthaftung, von Produktmängeln, von Qualitätsproblemen und der Verletzung geistiger Eigentumsrechte, der Nichtbeachtung steuerlicher Vorschriften und/oder behaupteter oder vermuteter Übertretungen von geltendem Recht. Außerdem könnten wir in Zusammenhang mit den Umständen, die zu den oben beschriebenen korruptionsbezogenen Rechtsstreitigkeiten geführt haben, mit weiteren von Dritten geltend gemachten Ansprüchen konfrontiert werden. Weitere Informationen mit Bezug auf konkrete Rechtsstreitigkeiten sind im »Anhang zum Konzernabschluss« enthalten. Wir können nicht ausschließen, dass die Ergebnisse dieser Rechtsstreitigkeiten und Verfahren unserem Geschäft, unserer Reputation oder unserer Marke erheblichen Schaden zufügen. Auch wenn wir in Rechtsstreitigkeiten von Fall zu Fall in der Hauptsache obsiegen sollten, könnten wir diesbezüglich dennoch in wesentlichem Umfang Rechtsanwalts- und sonstige Rechtsverteidigungskosten zu tragen haben. Wir bilden für aus Rechtsstreitigkeiten und Verfahren erwachsende Risiken Rückstellungen, wenn (1) eine gegenwärtige Verpflichtung aufgrund eines Ereignisses der Vergangenheit besteht, (2) es wahrscheinlich ist, dass deren Erfüllung einen Abfluss von Ressourcen erfordert, die wirtschaftlichen Nutzen beinhalten, und (3) die Verpflichtung verlässlich geschätzt werden kann. Des Weiteren halten wir eine Haftpflichtversicherung für bestimmte rechtliche Risiken in einer Höhe aufrecht, die das Management für angemessen hält und die einer in der Branche üblichen Vorgehensweise entspricht. Unser Versicherungsschutz bewahrt uns allerdings nicht vor etwaigen Reputationsschäden. Außerdem können wir möglicherweise aus Rechtsstreitigkeiten und Verfahren Verluste erleiden, die über der Höchstgrenze oder außerhalb des Deckungsbereichs dieser Versicherung liegen. Schließlich kann nicht gewährleistet werden, dass wir auch künftig sachgerechten Versicherungsschutz zu wirtschaftlich angemessenen Bedingungen erhalten werden. Jedes dieser Risiken könnte erhebliche nachteilige Auswirkungen auf unsere Vermögens-, Finanz- und Er-

tragslage haben. Außerdem könnten sich unsere Rückstellungen für Verpflichtungen aus Rechtsstreitigkeiten und Verfahren als nicht ausreichend erweisen, unsere letztlich hieraus resultierenden Verluste oder Ausgaben zu decken.

**Wir unterliegen Gesetzen und Regelungen zum Umweltschutz sowie anderen behördlichen Regelungen:** Einige Branchen, in denen wir tätig sind, sind stark reguliert. Gegenwärtige oder künftige umweltrechtliche oder sonstige staatliche Bestimmungen oder deren Änderungen können unsere operativen Kosten und Produktkosten erheblich steigern. Uns könnten auch Verpflichtungen aus Umweltverschmutzungen oder aus der Dekontamination von verseuchten Produktionsanlagen entstehen, die von uns errichtet oder betrieben werden. Beispielsweise sind wir verpflichtet, auf der Basis von Kostenschätzungen für die Stilllegung von Werken für die Produktion von Uran- und Mischoxidbrennelementen in Hannau/Deutschland sowie eines nuklearen Forschungs- und Dienstleistungszentrums in Karlstein/Deutschland Sanierungskosten vor allem in Bezug auf Dekontaminations- und Umweltschutzverpflichtungen zurückzustellen. Weitere Informationen finden sich im »Anhang zum Konzernabschluss«. Wir bilden Rückstellungen für Umweltrisiken, wenn (1) eine gegenwärtige Verpflichtung aufgrund eines Ereignisses der Vergangenheit besteht, (2) es wahrscheinlich ist, dass deren Erfüllung einen Abfluss von Ressourcen erfordert, die wirtschaftlichen Nutzen beinhalten, und (3) die Verpflichtung verlässlich geschätzt werden kann. Für bestimmte Umweltrisiken haben wir Haftpflichtversicherungen mit Deckungssummen abgeschlossen, die unser Management als angemessen und branchenüblich ansieht. Uns könnten aus Umweltschäden Verluste entstehen, die über die Versicherungssumme hinausgehen oder nicht durch den Versicherungsschutz abgedeckt sind. Solche Verluste könnten unsere Vermögens-, Finanz- und Ertragslage erheblich negativ beeinflussen. Außerdem könnten sich unsere Rückstellungen für Umweltverpflichtungen als nicht ausreichend erweisen, unsere letztlich hieraus resultierenden Verluste oder Ausgaben zu decken.



## CHANCEN

Im Rahmen des ERM-Ansatzes identifizieren, bewerten und reagieren wir regelmäßig auf die Chancen, die sich in unseren zahlreichen Geschäftsfeldern ergeben. Im Folgenden beschreiben wir unsere wesentlichsten Chancen. Dies sind aber nicht die einzigen Chancen, die sich uns bieten. Des Weiteren ist unsere Einschätzung der Chancen regelmäßigen Änderungen unterworfen, da sich unser Unternehmen, unsere Märkte und die Technologien kontinuierlich weiterentwickeln. Daraus können sich neue Chancen ergeben, bereits existierende Chancen können an Relevanz verlieren, oder die Bedeutung einer Chance kann sich für uns verändern. Grundsätzlich bewerten wir Chancen nach unserem besten Wissen und legen dabei unter anderem bestimmte Annahmen bezüglich der Marktentwicklung, des Marktpotenzials von Technologien oder Lösungen sowie der erwarteten Entwicklung von Kundennachfrage und Preisen zugrunde. Wenn Chancen realisiert werden, könnten sie einen geringeren Einfluss haben, als dieser ursprünglich auf Basis der zugrunde liegenden Annahmen geschätzt wurde. Es ist auch möglich, dass Chancen, die wir heute sehen, sich niemals verwirklichen.

**Wir befinden uns in einem Prozess der fortlaufenden Entwicklung und Implementierung von Initiativen zur Kostensenkung, Kapazitätsanpassung sowie zur Bereinigung unseres Portfolios:** Diese Maßnahmen zielen auf die Verbesserung unserer Wettbewerbsposition und die Realisierung von Kostenvorteilen ab. Beispielsweise erwarten wir nachhaltige Ergebnisverbesserungen aus unseren Maßnahmen in Bezug auf die Steuerung unserer Versorgungskette, die auf die Optimierung unseres Supply Chain Managements, die Erzielung damit in Zusammenhang stehender Einsparungen sowie die verbesserte Steuerung unserer Lieferantenrisiken ausgerichtet sind. Für weiterführende Informationen zum Supply Chain Management siehe »Geschäft und Rahmenbedingungen – Wertschöpfungskette – Supply Chain Management (Steuerung der Versorgungskette)«.

**Durch gezielte Akquisitionen und Equity-Beteiligungen sind wir ständig bemüht, unsere Technologieführerschaft zu verstärken, zusätzliche Marktpotenziale zu erschließen oder unser Produktportfolio weiterzuentwickeln:** Wir beobachten kontinuierlich unsere gegenwärtigen und künftigen Märkte hinsichtlich Chancen für strategische Akquisitionen oder Equity-Beteiligungen, die unser organisches Wachstum ergänzen können. Derartige Akquisitionen oder Equity-Beteiligungen können uns dabei unterstützen, unsere Marktposition in unseren derzeitigen Märkten zu stärken, neue Märkte zu erschließen oder unser Technologieportfolio in ausgewählten Bereichen zu ergänzen.

**Wir haben die Chance, auf dem Gebiet des Umwelt- und Klimaschutzes noch weiter zu wachsen:** Viele unserer Schlüsselbereiche in der Forschung und Entwicklung befassen sich mit Produkten und Lösungen zur Verstärkung und Erweiterung unseres Umweltportfolios. Unser Umweltportfolio umfasst Produkte und Lösungen mit besonders hoher Energieeffizienz, Anlagen und Komponenten zur Nutzung erneuerbarer Energien sowie Umwelttechnologien zur Wasser- und Luftreinhaltung. Diese Produkte und Lösungen sollen unseren Kunden dabei helfen, ihren Kohlendioxidausstoß zu verringern, ihre Energiekosten zu senken und durch höhere Produktivität ihren Unternehmenserfolg zu steigern. Wir gehen davon aus, dass in vielen Ländern wirtschaftspolitische Maßnahmen, einschließlich der bereits angekündigten Förderprogramme, in den kommenden Jahren zu einer steigenden Nachfrage nach solchen Produkten und Lösungen führen. Im Rahmen von One Siemens haben wir uns das Ziel gesetzt, bis zum Ende des Geschäftsjahrs 2014 mit unserem Umweltportfolio einen Umsatz von 40 Mrd. EUR zu übertreffen. Für weiterführende Informationen siehe »Geschäft und Rahmenbedingungen – Nachhaltigkeit – Umweltschutz – Umweltportfolio«.

**Wir sehen weitere Chancen im überdurchschnittlichen Wachstumspotenzial der Schwellenländer:** Es wird erwartet, dass die Schwellenländer in den kommenden Jahren deutlich schneller wachsen werden als die Industrienationen. Dies wird insbesondere durch das starke Wachstum der BRIC-Staaten Brasilien, Russland, Indien und China gestützt. Im Rahmen von One Siemens wollen wir Maßnahmen ergreifen, um den Anteil unseres Umsatzes aus Schwellenländern kontinuierlich auszubauen. Wir glauben, dass sich uns durch den Ausbau unserer Fähigkeiten zur Entwicklung, Produktion und



zum Vertrieb sogenannter SMART-Produkte (Simplicity, Maintenance friendly, Affordable, Reliable und Timely to Market: einfach, wartungsfreundlich, erschwinglich, zuverlässig und zeitnah zu vermarkten) Chancen bieten werden, in diesen strategischen Wachstumsmärkten Marktanteile zu gewinnen und unsere lokale Präsenz zu verstärken. Durch die Erweiterung unseres Portfolios um weitere SMART-Produkte und die Entwicklung besserer Vertriebskanäle sehen wir die Möglichkeit zur Umsatzsteigerung durch die Bedienung großer und schnell wachsender regionaler Märkte, an denen Kunden bei ihrer Kaufentscheidung niedrigere Preise als wichtiger erachten als Produkteigenschaften.

**Wir könnten durch die Lokalisierung von Wertschöpfungsaktivitäten in Ländern mit Kostenvorteilen unsere Kostenposition weiter verbessern:** Die Lokalisierung bestimmter Aktivitäten unserer Wertschöpfungskette wie Einkauf, Produktion, Wartung oder Dienstleistungen an Märkten wie den BRIC-Staaten oder dem Nahen und Mittleren Osten könnte es uns ermöglichen, unsere Kosten zu senken und unsere globale Wettbewerbsfähigkeit zu stärken, insbesondere im Vergleich zu Wettbewerbern aus Ländern mit günstigeren Kostenstrukturen.

**Wir sind kontinuierlich bestrebt, neue Technologien, Produkte und Lösungen zu entwickeln sowie bestehende zu verbessern:** Wir investieren in neue Technologien, die nach unserer Erwartung die künftige, auf den vier strategischen Megatrends demografischer Wandel, Urbanisierung, Klimawandel und Globalisierung basierende Nachfrage abdecken werden (für weitere Informationen siehe »Geschäft und Rahmenbedingungen – Strategie – Die globalen Megatrends«). Die Kernbereiche unserer Forschungs- und Entwicklungsaktivitäten umfassen unter anderem intelligente Stromnetze (*Smart Grids*), die Technologie für Elektrofahrzeuge, einschließlich ihrer Integration in diese intelligenten Stromnetze, sowie die Solarthermie (*Concentrated Solar Power*), die bei der zügigen Umsetzung des DESERTEC-Konzepts eine wichtige Rolle spielt.

## RECHTSSTREITIGKEITEN

Informationen zu Rechtsstreitigkeiten finden sich im »Anhang zum Konzernabschluss«.

## Angaben nach § 289 Abs. 4 und § 315 Abs. 4 HGB und erläuternder Bericht

### ZUSAMMENSETZUNG DES GEZEICHNETEN KAPITALS

Zum 30. September 2010 belief sich das gezeichnete Kapital der Gesellschaft auf 2,743 (im Vj. 2,743) Mrd. EUR. Das Grundkapital ist in 914.203.421 (im Vj. 914.203.421) auf Namen lautende, nennwertlose Stückaktien unterteilt, auf die ein anteiliger Betrag von 3,00 EUR je Aktie entfällt. Die Aktien sind voll eingezahlt. Ein Anspruch der Aktionäre auf Verbriefung ihrer Anteile ist nach § 4 Abs. 3 der Satzung ausgeschlossen, soweit nicht eine Verbriefung nach den Regeln erforderlich ist, die an einer Börse gelten, an der die Aktie zugelassen ist. Es können Sammelurkunden über Aktien ausgestellt werden. Gemäß § 67 Abs. 2 AktG gilt im Verhältnis zur Gesellschaft als Aktionär nur, wer als solcher im Aktienregister eingetragen ist. Die Aktionäre haben der Gesellschaft zur Eintragung in das Aktienregister, soweit es sich um natürliche Personen handelt, ihren Namen, ihre Anschrift und ihr Geburtsdatum, soweit es sich um juristische Personen handelt, ihre Firma, ihre Geschäftsanschrift und ihren Sitz sowie in jedem Fall die Zahl der von ihnen gehaltenen Aktien und ihre elektronische Postanschrift anzugeben, soweit sie eine solche haben.

Mit allen Aktien sind die gleichen Rechte und Pflichten verbunden. Jede Aktie gewährt in der Hauptversammlung eine Stimme und ist maßgebend für den Anteil der Aktionäre am Gewinn der Gesellschaft. Hiervon ausgenommen sind von der Gesellschaft gehaltene eigene Aktien, aus denen der Gesellschaft keine Rechte zustehen. Die Rechte und Pflichten der Aktionäre ergeben sich im Einzelnen aus den Regelungen des Aktiengesetzes, insbesondere aus den §§ 12, 53a ff., 118 ff. und 186 AktG.

### BESCHRÄNKUNGEN, DIE STIMMRECHTE ODER DIE ÜBERTRAGUNG VON AKTIEN BETREFFEN

Aktien, die die Siemens AG im Rahmen ihrer früheren Mitarbeiteraktienprogramme bis 2008 ausgab, unterliegen einer firmenseitigen privatrechtlichen Veräußerungssperre von zwei bis fünf Jahren. Vor Ablauf der Sperrfrist dürfen die so übertragenen Aktien von den begünstigten Mitarbeitern grundsätzlich nicht veräußert werden. Aktien, die weltweit an Mitarbeiter unter dem Mitarbeiteraktienprogramm ausgegeben werden, das seit Beginn des Geschäftsjahrs 2009 existiert (*Share Matching Plan*), unterliegen, sofern rechtlich zulässig,

keiner Veräußerungssperre. Allerdings sind die Teilnehmer dieses Aktienprogramms gehalten, die ihnen unter dem Programm ausgegebenen Aktien für einen Zeitraum von drei Jahren zu halten, um für jeweils drei solche Aktien ohne Zuzahlung eine Matching-Aktie zu erhalten, vorausgesetzt, dass die Teilnehmer durchgängig bis zum Ablauf der Sperrfrist bei der Siemens AG oder einer anderen Konzerngesellschaft beschäftigt waren. Der Verkauf oder die Übertragung der Aktien vor Ablauf der Dreijahresfrist führt dazu, dass für diese verkauften Aktien keine Matching-Aktien ausgegeben werden.

Die von Siemens-Vermögensverwaltung GmbH (vSV) hat auf Dauer angelegte Vollmachten, um namens der Mitglieder der Familie von Siemens die Stimmrechte von 11.459.406 Aktien (Stand: 13. Oktober 2010) auszuüben, wobei diese Aktien einen Teil des Bestands der von Mitgliedern der Familie von Siemens insgesamt gehaltenen Aktien darstellen. Die vSV ist eine Gesellschaft mit beschränkter Haftung und Partei eines Familienvertrags mit unter anderem Mitgliedern der Familie von Siemens. Zur Bündelung und Wahrung ihrer Interessen, haben die Familienmitglieder eine Familiengesellschaft gegründet, die der vSV Vorschläge für die Ausübung des Stimmrechts in der Hauptversammlung der Siemens AG macht, die die vSV bei Ausübung ihres Ermessens berücksichtigt. Gemäß Familienvertrag übt die vSV das Stimmrecht für alle Aktien, für die sie eine Vollmacht erhalten hat, einheitlich aus.

#### **BETEILIGUNGEN AM KAPITAL, DIE 10 % DER STIMMRECHTE ÜBERSCHREITEN**

Nach dem Wertpapierhandelsgesetz hat jeder Anleger, der durch Erwerb, Veräußerung oder auf sonstige Weise bestimmte Anteile an Stimmrechten der Gesellschaft erreicht, überschreitet oder unterschreitet, dies der Gesellschaft und der Bundesanstalt für Finanzdienstleistungsaufsicht mitzuteilen. Der niedrigste Schwellenwert für diese Mitteilungspflicht ist 3%. Direkte oder indirekte Beteiligungen am Kapital der Gesellschaft, die 10% der Stimmrechte erreichen oder überschreiten, sind uns hiernach nicht gemeldet worden und auch nicht bekannt.

#### **AKTIEN MIT SONDERRECHTEN, DIE KONTROLLBEFUGNISSE VERLEIHEN**

Aktien mit Sonderrechten, die Kontrollbefugnisse verleihen, bestehen nicht.

#### **ART DER STIMMRECHTSKONTROLLE, WENN ARBEIT- NEHMER AM KAPITAL BETEILIGT SIND UND IHRE KONTROLLRECHTE NICHT UNMITTELBAR AUSÜBEN**

Soweit die Siemens AG im Rahmen ihres Mitarbeiteraktienprogramms Aktien an Mitarbeiter ausgibt, werden die Aktien den Mitarbeitern unmittelbar übertragen. Die begünstigten Mitarbeiter können die ihnen aus den Mitarbeiteraktien zustehenden Kontrollrechte wie andere Aktionäre unmittelbar nach Maßgabe der gesetzlichen Vorschriften und der Bestimmungen der Satzung ausüben.

#### **GESETZLICHE VORSCHRIFTEN UND BESTIMMUNGEN DER SATZUNG ÜBER DIE ERNENNUNG UND ABBERUFUNG VON VORSTANDSMITGLIEDERN UND DIE ÄNDERUNG DER SATZUNG**

Die Bestellung und die Abberufung von Mitgliedern des Vorstands sind in den §§ 84 und 85 AktG sowie in § 31 MitbestG geregelt. Danach werden Vorstandsmitglieder vom Aufsichtsrat auf höchstens fünf Jahre bestellt. Eine wiederholte Bestellung oder Verlängerung der Amtszeit, jeweils für höchstens fünf Jahre, ist zulässig. Nach § 31 Abs. 2 MitbestG ist für die Bestellung von Vorstandsmitgliedern eine Mehrheit von mindestens zwei Dritteln der Mitglieder des Aufsichtsrats erforderlich. Kommt hiernach eine Bestellung nicht zustande, hat der Vermittlungsausschuss des Aufsichtsrats innerhalb eines Monats nach der Abstimmung dem Aufsichtsrat einen Vorschlag für die Bestellung zu machen. Der Aufsichtsrat bestellt dann die Mitglieder des Vorstands mit der Mehrheit der Stimmen seiner Mitglieder. Kommt auch hiernach eine Bestellung nicht zustande, hat bei einer erneuten Abstimmung der Aufsichtsratsvorsitzende zwei Stimmen.

Der Vorstand besteht gemäß § 8 Abs. 1 der Satzung aus mehreren Personen; die Zahl der Vorstandsmitglieder wird vom Aufsichtsrat bestimmt. Der Aufsichtsrat kann einen Vorsitzenden des Vorstands sowie einen stellvertretenden Vorsitzenden ernennen, gemäß § 84 AktG und § 9 der Satzung. Fehlt ein erforderliches Vorstandsmitglied, wird das Mitglied nach § 85 AktG in dringenden Fällen auf Antrag eines Beteiligten gerichtlich bestellt. Der Aufsichtsrat kann die Bestellung zum Vorstandsmitglied und die Ernennung zum Vorsitzenden des Vorstands widerrufen, wenn ein wichtiger Grund vorliegt, gemäß § 84 Abs. 3 AktG.

Eine Änderung der Satzung bedarf nach § 179 AktG eines Beschlusses der Hauptversammlung. Die Befugnis zu Änderungen, die nur die Fassung betreffen, ist gemäß § 13 Abs. 2 der Satzung dem Aufsichtsrat übertragen. Darüber hinaus ist der

Aufsichtsrat durch Hauptversammlungsbeschluss vom 26. Januar 2006 und 27. Januar 2009 jeweils ermächtigt worden, § 4 der Satzung entsprechend der jeweiligen Ausnutzung des Genehmigten Kapitals 2006 und des Genehmigten Kapitals 2009 und nach Ablauf der jeweiligen Ermächtigungsfrist zu ändern.

Beschlüsse der Hauptversammlung bedürfen der einfachen Stimmenmehrheit, soweit nicht das Gesetz zwingend eine größere Mehrheit vorschreibt. Satzungsändernde Beschlüsse der Hauptversammlung bedürfen nach § 179 Abs. 2 AktG einer Mehrheit von mindestens drei Viertel des bei der Beschlussfassung vertretenen Grundkapitals, sofern die Satzung nicht eine andere Kapitalmehrheit bestimmt.

#### **BEFUGNISSE DES VORSTANDS, AKTIEN AUSZUGEBEN ODER ZURÜCKZUKAUFEN**

Der Vorstand ist ermächtigt, das Grundkapital in der Zeit bis zum 25. Januar 2011 mit Zustimmung des Aufsichtsrats um bis zu 71.130.000 EUR durch Ausgabe von bis zu 23.710.000 auf Namen lautenden Stückaktien gegen Geldeinlagen zu erhöhen (Genehmigtes Kapital 2006). Die Ermächtigung kann in Teilbeträgen ausgenutzt werden. Das Bezugsrecht der Aktionäre ist ausgeschlossen. Die neuen Aktien dürfen nur zum Angebot von Aktien an Mitarbeiter der Gesellschaft und ihrer Konzerngesellschaften ausgegeben werden, soweit diese Konzerngesellschaften nicht selbst börsennotiert sind und kein eigenes Mitarbeiteraktienprogramm haben.

Darüber hinaus ist der Vorstand ermächtigt, das Grundkapital in der Zeit bis zum 26. Januar 2014 mit Zustimmung des Aufsichtsrats um bis zu 520.800.000 EUR durch Ausgabe von bis zu 173.600.000 auf Namen lautenden Stückaktien gegen Bar- und/oder Sacheinlagen zu erhöhen (Genehmigtes Kapital 2009). Der Vorstand ist ermächtigt, mit Zustimmung des Aufsichtsrats das Bezugsrecht bei Kapitalerhöhungen gegen Sacheinlagen auszuschließen. Bei Barkapitalerhöhungen kann das Bezugsrecht ausgeschlossen werden, (i) um etwaige Spitzenbeträge zu verwerten, (ii) um Inhabern von Wandlungs- oder Optionsrechten, die von der Gesellschaft oder deren Konzerngesellschaften ausgegeben wurden oder werden, ein Bezugsrecht auf neue Aktien zu gewähren, soweit es zum Verwässerungsschutz erforderlich ist, sowie (iii) wenn der Ausgabebetrag der neuen Aktien den Börsenpreis nicht wesentlich unterschreitet und die gemäß § 186 Abs. 3 S. 4 AktG ausgegebenen Aktien insgesamt 10 % des Grundkapitals zum Zeitpunkt der Ausnutzung der Ermächtigung nicht überschreiten.

Zum 30. September 2010 verfügt die Siemens AG somit über Genehmigtes Kapital von insgesamt nominal 591.930.000 EUR, das in Teilbeträgen mit unterschiedlichen Befristungen durch Ausgabe von bis zu 197.310.000 auf Namen lautenden Stückaktien ausgegeben werden kann. Die näheren Einzelheiten ergeben sich aus § 4 der Satzung.

Durch Beschluss der Hauptversammlung am 26. Januar 2010 wurde der Vorstand ermächtigt, in der Zeit bis zum 25. Januar 2015 Schuldverschreibungen im Gesamtnennbetrag von bis zu 15.000.000.000 EUR mit Wandlungsrecht oder mit in Optionsscheinen verbrieften Optionsrechten oder eine Kombination dieser Instrumente auf insgesamt bis zu 200.000.000 auf den Namen lautende Stückaktien der Siemens Aktiengesellschaft (»Siemens-Aktien«) mit einem anteiligen Betrag am Grundkapital von insgesamt bis zu 600.000.000 EUR (»Schuldverschreibungen«) zu begeben. Die Schuldverschreibungen sind gegen Bar- oder Sachleistung auszugeben. Die Ermächtigung umfasst auch die Möglichkeit, für von Konzerngesellschaften der Gesellschaft ausgegebene Schuldverschreibungen die erforderlichen Garantien zu übernehmen und weitere für eine erfolgreiche Begebung erforderliche Erklärungen abzugeben und Handlungen vorzunehmen, sowie außerdem, Siemens-Aktien zu gewähren, soweit die Inhaber von Wandlungsschuldverschreibungen oder von Optionsscheinen aus Optionsschuldverschreibungen von ihrem Wandlungs- oder Optionsrecht Gebrauch machen oder Pflichtwandlungen erfolgen. Die Schuldverschreibungen können einmalig oder mehrmals, insgesamt oder in Teilen sowie auch gleichzeitig in verschiedenen Tranchen begeben werden. Alle Teilschuldverschreibungen einer jeweils begebenen Tranche sind mit unter sich jeweils gleichrangigen Rechten und Pflichten zu versehen.

Der Wandlungs-/Optionspreis darf 80 % des Kurses der Aktien der Siemens AG im Xetra-Handel (oder in einem vergleichbaren Nachfolgesystem) nicht unterschreiten. Maßgeblich dafür ist der durchschnittliche Schlusskurs an den zehn Börsenhandelstagen vor der endgültigen Entscheidung des Vorstands über die Abgabe eines Angebots zur Zeichnung von Schuldverschreibungen beziehungsweise über die Erklärung der Annahme durch die Gesellschaft nach einer öffentlichen Aufforderung zur Abgabe von Zeichnungsangeboten. Bei einem Bezugsrechtshandel sind die Tage des Bezugsrechtshandels mit Ausnahme der beiden letzten Börsentage des Bezugsrechtshandels maßgeblich. § 9 Abs. 1 Aktiengesetz bleibt unberührt.

Im Fall der Ausgabe von Optionsschuldverschreibungen darf der anteilige Betrag am Grundkapital der je Optionsschuldverschreibung zu beziehenden Aktien höchstens dem Nenn-

betrag der Optionsschuldverschreibungen entsprechen. Im Fall der Ausgabe von Wandelschuldverschreibungen darf der anteilige Betrag am Grundkapital der je Wandelschuldverschreibung zu beziehenden Aktien höchstens dem Nennbetrag beziehungsweise einem unter dem Nennbetrag liegenden Ausgabepreis der Wandelschuldverschreibung entsprechen.

Die Ermächtigung umfasst auch die Möglichkeit, nach näherer Maßgabe der jeweiligen Schuldverschreibungsbedingungen in bestimmten Fällen Verwässerungsschutz zu gewähren beziehungsweise Anpassungen vorzunehmen.

Der Vorstand ist ermächtigt, die weiteren Bedingungen der Schuldverschreibung festzusetzen beziehungsweise im Einvernehmen mit der jeweils ausgehenden Konzerngesellschaft festzulegen.

Die Schuldverschreibungen sind den Aktionären grundsätzlich zum Bezug anzubieten; dabei können sie auch an Kreditinstitute mit der Verpflichtung ausgegeben werden, sie den Aktionären zum Bezug anzubieten. Der Vorstand ist jedoch ermächtigt, mit Zustimmung des Aufsichtsrats das Bezugsrecht auszuschließen, (i) sofern der Ausgabepreis für eine Schuldverschreibung deren nach anerkannten finanzmathematischen Methoden ermittelten theoretischen Marktwert nicht wesentlich unterschreitet, (ii) soweit dies für Spitzenbeträge erforderlich ist, die sich aufgrund des Bezugsverhältnisses ergeben, (iii) um den Inhabern von Wandlungs-/Optionsrechten auf Aktien der Gesellschaft zum Ausgleich von Verwässerungen Bezugsrechte zu gewähren und (iv) soweit die Schuldverschreibungen gegen Sachleistungen, insbesondere im Rahmen von Unternehmenszusammenschlüssen oder beim Erwerb von Unternehmen oder Beteiligungen daran, ausgegeben werden.

Zur Gewährung von Aktien an die Inhaber von Wandel-/Optionsschuldverschreibungen, die aufgrund der Ermächtigung des Vorstands durch die Hauptversammlung vom 26. Januar 2010 von der Gesellschaft oder durch eine Konzerngesellschaft bis zum 25. Januar 2015 ausgegeben werden, wurde das Grundkapital um bis zu 600.000.000 EUR durch Ausgabe von bis zu 200.000.000 auf den Namen lautenden Stückaktien bedingt erhöht (Bedingtes Kapital 2010).

Weitere Informationen zu den Bedingten Kapitalia der Gesellschaft zum 30. September 2010 befinden sich im »Anhang zum Konzernabschluss«.

Aufgrund eines Beschlusses der Hauptversammlung vom 27. Januar 2009 war die Gesellschaft ermächtigt, bis zum 26. Juli 2010 eigene Aktien im Umfang von bis zu insgesamt 10% des zum Zeitpunkt der Beschlussfassung bestehenden Grundkapitals in Höhe von 914.203.421 Stück Aktien zu erwerben. Am 26. Januar 2010 ermächtigte die Hauptversammlung die Gesellschaft, in der Zeit bis zum 25. Juli 2011 eigene Aktien im Umfang von bis zu insgesamt 10% des zum Zeitpunkt der Beschlussfassung bestehenden Grundkapitals in Höhe von 914.203.421 Stück Aktien zu erwerben. Die nachfolgend näher dargestellte Ermächtigung vom 26. Januar 2010 ersetzte die vorangegangene Ermächtigung vom 27. Januar 2009 mit Wirkung zum 1. März 2010. Dabei dürfen auf die aufgrund dieser Ermächtigung erworbenen Aktien zusammen mit anderen Aktien der Gesellschaft, die die Gesellschaft bereits erworben hat und noch besitzt oder die ihr gemäß den §§71d und 71e AktG zuzurechnen sind, zu keinem Zeitpunkt mehr als 10% des jeweiligen Grundkapitals entfallen. Die Ermächtigung kann ganz oder in Teilbeträgen, einmal oder mehrmals durch die Gesellschaft, aber auch durch ihre Konzerngesellschaften oder für ihre oder deren Rechnung durch Dritte ausgenutzt werden.

Der Erwerb der Siemens-Aktien erfolgt nach Wahl des Vorstands (1) als Kauf über die Börse oder (2) mittels einer öffentlichen Kaufofferte. Erfolgt der Erwerb der Siemens-Aktien als Kauf über die Börse, darf der gezahlte Kaufpreis je Siemens-Aktie (ohne Erwerbsnebenkosten) den am Handelstag durch die Eröffnungsauktion ermittelten Kurs einer Siemens-Aktie im Xetra-Handel (oder in einem vergleichbaren Nachfolgesystem) um nicht mehr als 10% überschreiten und um nicht mehr als 20% unterschreiten. Beim Erwerb über eine öffentliche Kaufofferte darf der Kaufpreis beziehungsweise die Kaufpreisspanne je Siemens-Aktie (ohne Erwerbsnebenkosten) den durchschnittlichen Schlusskurs einer Siemens-Aktie im Xetra-Handel (oder in einem vergleichbaren Nachfolgesystem) an den letzten fünf Handelstagen vor dem Tag der endgültigen Entscheidung des Vorstands über das formelle Angebot um nicht mehr als 10% überschreiten und um nicht mehr als 20% unterschreiten. Sofern bei einer öffentlichen Kaufofferte die Anzahl der angedienten Siemens-Aktien die von der Gesellschaft insgesamt zum Erwerb vorgesehene Aktienanzahl übersteigt, kann das Andienungsrecht der Aktionäre insoweit ausgeschlossen werden, als der Erwerb nach dem Verhältnis der angedienten Siemens-Aktien erfolgt. Ebenso kann eine bevorrechtigte Berücksichtigung geringer Stückzahlen bis zu 150 Stück angedienter Siemens-Aktien je Aktionär vorgesehen werden.

Ergänzend wurde der Vorstand ermächtigt, mit Zustimmung des Aufsichtsrats Optionen zu veräußern, die die Gesellschaft zum Erwerb von Siemens-Aktien bei Ausübung der Option verpflichten («Put-Optionen»), Optionen zu erwerben und auszuüben, die der Gesellschaft das Recht vermitteln, Siemens-Aktien bei Ausübung der Option zu erwerben («Call-Optionen»), und Siemens-Aktien unter Einsatz einer Kombination aus Put- und Call-Optionen zu erwerben. Alle Aktienerwerbe unter Einsatz von Put-Optionen, Call-Optionen oder einer Kombination aus Put- und Call-Optionen sind dabei auf Aktien im Umfang von höchstens 5% des zum Zeitpunkt der Beschlussfassung der Hauptversammlung bestehenden Grundkapitals in Höhe von 914.203.421 Stück Aktien beschränkt. Die Laufzeit der Optionen muss so gewählt werden, dass der Erwerb der Siemens-Aktien in Ausübung der Optionen nicht nach dem 25. Juli 2011 erfolgt. Durch die Optionsbedingungen muss sichergestellt sein, dass die Optionen nur mit Aktien bedient werden, die unter Wahrung des Gleichbehandlungsgrundsatzes über die Börse zu dem im Zeitpunkt des börslichen Erwerbs aktuellen Börsenkurs der Siemens-Aktie im Xetra-Handel (oder in einem vergleichbaren Nachfolgesystem) erworben wurden. Der in der Option vereinbarte, bei Ausübung der Option zu zahlende Kaufpreis je Siemens-Aktie («Ausübungspreis») darf den durchschnittlichen Schlusskurs einer Siemens-Aktie im Xetra-Handel (oder in einem vergleichbaren Nachfolgesystem) an den letzten drei Handelstagen vor Abschluss des betreffenden Optionsgeschäfts um nicht mehr als 10% überschreiten und um nicht mehr als 30% unterschreiten (jeweils ohne Erwerbsnebenkosten, aber unter Berücksichtigung der erhaltenen beziehungsweise gezahlten Optionsprämie).

Der Vorstand wurde durch Hauptversammlungsbeschluss vom 26. Januar 2010 ermächtigt, die aufgrund dieser oder einer früher erteilten Ermächtigung erworbenen eigenen Aktien auch (i) einzuziehen, (ii) zur Erfüllung der Verpflichtungen aus dem Siemens-Aktienoptionsplan 2001 zu verwenden, (iii) Personen, die in einem Arbeitsverhältnis zu der Gesellschaft oder einem mit ihr verbundenen Unternehmen standen, sowie Organmitgliedern von mit der Gesellschaft verbundenen Unternehmen zum Erwerb anzubieten oder mit einer Sperrfrist von nicht weniger als zwei Jahren zuzusagen beziehungsweise zu übertragen, (iv) mit Zustimmung des Aufsichtsrats Dritten gegen Sachleistungen, insbesondere im Rahmen von Unternehmenszusammenschlüssen oder beim Erwerb von Unternehmen oder Beteiligungen daran, anzubieten und auf diese zu übertragen, (v) mit Zustimmung des Aufsichtsrats gegen Barzahlung an Dritte zu veräußern, wenn der Preis, zu dem die Siemens-Aktien veräußert werden, den am Handelstag durch die Eröffnungsauktion ermittelten Kurs ei-

ner Siemens-Aktie im Xetra-Handel (oder in einem vergleichbaren Nachfolgesystem) nicht wesentlich unterschreitet (ohne Erwerbsnebenkosten) oder (vi) zur Erfüllung von Verpflichtungen aus von der Gesellschaft oder einer ihrer Konzerngesellschaften ausgegebenen Wandlungs-/Optionsschuldverschreibungen zu verwenden. Des Weiteren wurde der Aufsichtsrat ermächtigt, die aufgrund dieser oder einer früher erteilten Ermächtigung erworbenen eigenen Aktien Mitgliedern des Vorstands der Siemens AG als aktienbasierte Vergütung unter den gleichen Konditionen wie den Mitarbeitern der Gesellschaft zum Erwerb anzubieten oder mit einer Sperrfrist von nicht weniger als zwei Jahren zuzusagen und zu übertragen.

Zum 30. September 2010 verfügt die Gesellschaft über 44.366.416 (im Vj. 47.777.661) Stück eigene Aktien.

#### **WESENTLICHE VEREINBARUNGEN DER GESELLSCHAFT, DIE UNTER DER BEDINGUNG EINES KONTROLLWECHSELS INFOLGE EINES ÜBERNAHMEANGEBOTS STEHEN**

Die Siemens AG verfügt über zwei Kreditlinien von insgesamt 9 Mrd. USD, die ein Kündigungsrecht des Darlehensgebers für den Fall vorsehen, dass (i) die Siemens AG Tochtergesellschaft eines anderen Unternehmens wird oder (ii) eine Person oder eine Gruppe gemeinsam handelnder Personen die Kontrolle über die Siemens AG erwirbt, indem sie die Möglichkeit erhält, einen bestimmenden Einfluss auf die Tätigkeit der Siemens AG auszuüben (Verordnung (EG) Nr. 139/2004 des Rates). Darüber hinaus steht der Gesellschaft eine bilaterale Kreditlinie von 450 Mio. EUR zur Verfügung, die vom Darlehensgeber gekündigt werden kann, wenn es in den gesellschaftsrechtlichen Verhältnissen der Siemens AG zu erheblichen Veränderungen kommt, die die Rückzahlung des Kredits gefährden.

Die von der Siemens AG unter den International Swaps and Derivatives Association Inc. (ISDA) Master Agreements geschlossenen Rahmenverträge («ISDA Agreements») gewähren dem jeweiligen Vertragspartner gegenüber der Gesellschaft ein Kündigungsrecht bei Eintritt der folgenden Ereignisse: (i) Die Gesellschaft wird auf einen Dritten verschmolzen oder überträgt im Wesentlichen alle Vermögensgegenstände auf einen Dritten, und (1) die Kreditwürdigkeit der daraus hervorgehenden Einheit ist wesentlich schlechter als die der Gesellschaft vor diesem Ereignis, oder (2) die daraus hervorgehende Einheit übernimmt nicht gleichzeitig die Verbindlichkeiten der Gesellschaft unter den *ISDA Agreements*, oder (ii) einige ISDA Agreements gewähren dem jeweiligen Vertragspartner



zusätzlich ein Kündigungsrecht, wenn ein Dritter Aktien an der Gesellschaft erwirbt, die hinreichende Stimmrechte vermitteln, um die Mehrheit des Aufsichtsrats der Gesellschaft zu wählen, oder wenn der Dritte auf andere Weise Kontroll Einfluss auf wesentliche Geschäftsentscheidungen der Gesellschaft erlangt und die Kreditwürdigkeit der Gesellschaft wesentlich schlechter ist als vor diesem Ereignis. In beiden Fällen sind die ISDA Agreements derart ausgestaltet, dass im Fall einer Kündigung die ausstehenden und unter den ISDA Agreements dokumentierten Zahlungsansprüche verrechnet werden.

#### **ENTSCHÄDIGUNGSVEREINBARUNGEN DER GESELLSCHAFT, DIE FÜR DEN FALL EINES ÜBERNAHMEANGEBOTS MIT VORSTANDSMITGLIEDERN ODER ARBEITNEHMERN GETROFFEN SIND**

Im Fall eines »Change of Control« – das heißt, wenn ein oder mehrere gemeinsam handelnde Aktionäre die Stimmrechtsmehrheit an der Siemens AG erwerben und einen beherrschenden Einfluss ausüben, die Siemens AG durch Abschluss eines Unternehmensvertrags im Sinne des § 291 AktG zu einem abhängigen Unternehmen wird oder bei Verschmelzung der Siemens AG auf ein anderes Unternehmen – hat jedes einzelne Mitglied des Vorstands das Recht zur Kündigung des Anstellungsvertrags, wenn sich durch den »Change of Control« eine wesentliche Änderung seiner Stellung ergibt (zum Beispiel durch Änderung der Strategie des Unternehmens oder durch Änderung des Tätigkeitsbereichs des Vorstandsmitglieds). Bei Ausübung des Rechts zur Kündigung hat das Mitglied des Vorstands einen Abfindungsanspruch in Höhe der für das letzte vor Vertragsbeendigung abgelaufene Geschäftsjahr geltenden Grundvergütung, des Bonus-Zielbetrags und des Zielbetrags für Stock Awards für die restliche Vertragslaufzeit, maximal jedoch für vierundzwanzig Monate. Die Abfindung wird zur pauschalen Berücksichtigung einer Abzinsung und zur Anrechnung anderweitigen Verdienstes um 15 % gekürzt, bezogen auf den Teil der Ausgleichszahlung, der ohne Berücksichtigung der ersten sechs Monate der restlichen Vertragslaufzeit ermittelt wurde. Zusätzlich werden Sachbezüge durch die Zahlung eines Betrags in Höhe von 5 % der Abfindungssumme abgegolten. Die zugesagten aktienbasierten Vergütungsbestandteile bleiben unberührt. Kein Abfindungsanspruch besteht, wenn das Vorstandsmitglied aus Anlass oder im Zusammenhang mit dem »Change of Control« Leistungen von Dritten erhält. Ein Recht zur Kündigung besteht nicht, wenn der »Change of Control« innerhalb von zwölf Monaten vor Übertritt des Vorstandsmitglieds in den Ruhestand eintritt.

## **Angaben nach § 289 Abs. 5 und § 315 Abs. 2 Nr. 5 HGB und erläuternder Bericht**

Das übergeordnete Ziel unseres rechnungslegungsbezogenen internen Kontroll- und Risikomanagementsystems ist, die Ordnungsmäßigkeit der Finanzberichterstattung im Sinne einer Übereinstimmung des Konzernabschlusses und des Konzernlageberichts mit allen einschlägigen Vorschriften sicherzustellen.

Wie im Abschnitt »Bericht über die voraussichtliche Entwicklung mit ihren wesentlichen Chancen und Risiken – Risikomanagement« beschrieben, basiert unser ERM-Ansatz auf dem weltweit akzeptierten Rahmenwerk »Enterprise Risk Management – Integrated Framework«, das vom COSO entwickelt wurde. Da eines der Ziele dieses Rahmenwerks die Verlässlichkeit der Finanzberichterstattung ist, beinhaltet es auch eine rechnungslegungsbezogene Sichtweise. Darüber hinaus verbindet das Rahmenwerk den ERM-Prozess mit dem Prozess der Finanzberichterstattung und ist eng in das interne Kontrollsystem eingebunden. Das von uns eingeführte rechnungslegungsbezogene interne Kontrollsystem (»Kontrollsystem«) basiert auf dem ebenfalls vom COSO entwickelten und international anerkannten Rahmenwerk »Internal Control – Integrated Framework«. Beide Systeme ergänzen sich gegenseitig. So können beispielsweise identifizierte Risiken Lücken im Kontrollsystem aufdecken, die durch die Implementierung und Überwachung neuer Kontrollen geschlossen werden könnten. Umgekehrt kann aus der Überwachung des Kontrollsystems die Feststellung resultieren, dass bestimmte Risiken nicht so wirksam gesteuert werden wie ursprünglich angenommen.

Siemens verfügt über ein konzernweit standardisiertes Verfahren zur Überwachung der Wirksamkeit des Kontrollsystems, das in Einklang mit den Anforderungen des US-amerikanischen Sarbanes-Oxley Act steht. Hierfür werden notwendige Kontrollen definiert, nach einheitlichen Vorgaben dokumentiert und regelmäßig getestet.

Die Verantwortung für die Einrichtung und wirksame Unterhaltung angemessener Kontrollen über die Finanzberichterstattung liegt beim Management der Siemens AG, das zu jedem Geschäftsjahresende die Angemessenheit und Wirksamkeit des Kontrollsystems beurteilt. Zum 30. September 2010 hat das Management die Wirksamkeit der internen Kontrollen über die Finanzberichterstattung festgestellt. Allerdings bestehen bei jedem Kontrollsystem gewisse Einschränkungen



die Wirksamkeit betreffend, und kein Kontrollsystem – auch wenn es als wirksam beurteilt wurde – kann alle unzutreffenden Angaben verhindern oder aufdecken.

Den konzeptionellen Rahmen für die Erstellung des Konzernabschlusses bilden die Bilanzierungsrichtlinien des Konzerns sowie der Kontenplan, die beide von der Corporate-Finance-Abteilung vorgegeben werden und über alle Einheiten hinweg konsistent angewendet werden müssen. Neue Gesetze, Rechnungslegungsstandards und andere offizielle Verlautbarungen werden fortlaufend bezüglich ihrer Relevanz und Auswirkungen auf den Konzernabschluss und -lagebericht analysiert. Bei Bedarf werden unsere Bilanzierungsrichtlinien und der Kontenplan entsprechend angepasst. In quartalsweise herausgegebenen Abschlussbriefen werden die Rechnungswesenabteilungen der Siemens AG und ihrer Tochterunternehmen über aktuelle Themen betreffend Rechnungslegung und Abschlusserstellungsprozess sowie über einzuhaltende Fristen informiert. Die konzeptionellen und terminlichen Vorgaben sowie die Überwachung deren Einhaltung sollen das Risiko von Siemens reduzieren, den Konzernabschluss nicht sachgerecht und nicht innerhalb der geforderten Fristen aufstellen oder offenlegen zu können.

Die Datengrundlage für die Erstellung des Konzernabschlusses bilden die von der Siemens AG und deren Tochterunternehmen berichteten Abschlussinformationen, die wiederum auf den in den Einheiten erfassten Buchungen basieren. Die Buchführung erfolgt in den meisten Fällen auf Ebene der Tochtergesellschaften; allerdings können die Tochtergesellschaften hierfür auch auf die Dienste unserer internen Dienstleistungsorganisation Global Shared Services zurückgreifen. Im Bereich der Buchführung bietet diese Organisation unter anderem Dienstleistungen in Bezug auf die Abschlusserstellung, das Hauptbuch, Forderungen, Verbindlichkeiten, Anlagenbuchhaltung sowie die Lohn- und Gehaltsabrechnung an. Zusätzlich bedienen wir uns bei einigen Themen, die Spezialkenntnisse erfordern, zum Beispiel zur Bewertung der Pensionsverpflichtungen, der Unterstützung externer Dienstleister.

Auf Basis der berichteten Abschlussinformationen wird der Konzernabschluss, einschließlich der Teilkonzernabschlüsse auf Ebene der Divisionen, Sektoren und Sektorübergreifenden Geschäfte, im Konsolidierungssystem erstellt. Die Konsolidierungsmaßnahmen sowie die Überwachung der Einhaltung der zeitlichen und prozessualen Vorgaben erfolgen durch Mitarbeiter mit entsprechender Verantwortung in den Konsolidierungsabteilungen auf den jeweiligen Ebenen sowie auf der Konzernebene.

Die zur Erstellung des Konzernabschlusses durchzuführenden Konsolidierungsschritte werden auf allen Ebenen manuellen wie auch systemtechnischen Kontrollen unterzogen. Hierbei werden die angelieferten Abschlussinformationen automatisiert auf rechnungswesensspezifische Zusammenhänge und Abhängigkeiten hin überprüft. Die Ursachen für jede Validierungs- oder Warnmeldung sind von der anliefernden Konzerneinheit vor der endgültigen Freigabe der Abschlussinformationen zu beheben.

In den Rechnungslegungsprozess einbezogene Mitarbeiter werden bereits bei ihrer Auswahl auf ihre fachliche Eignung überprüft und danach regelmäßig geschult. Als grundsätzliches Prinzip gilt auf jeder Ebene das »Vier-Augen-Prinzip«. Zudem müssen die Abschlussinformationen auf jeder Ebene bestimmte Freigabeprozesse durchlaufen. Weitere Kontrollmechanismen sind Soll-Ist-Vergleiche sowie Analysen über die inhaltliche Zusammensetzung und Veränderungen der einzelnen Positionen, sowohl der von Konzerneinheiten berichteten Abschlussinformationen als auch des Konzernabschlusses.

In den rechnungslegungsbezogenen IT-Systemen sind Zugriffsregeln definiert, um zu gewährleisten, dass rechnungslegungsbezogene Daten vor nicht genehmigtem Zugriff, Verwendung und Veränderung geschützt sind. Jede in den Konzernabschluss einbezogene Einheit unterliegt dem zentral vorgegebenen Regelwerk zur Informationssicherheit. Dadurch soll sichergestellt werden, dass die Nutzer solcher IT-Systeme nur auf die Informationen und Systeme Zugriff haben, die sie zur Erfüllung ihrer Aufgaben benötigen.

Das Management der Sektoren, der Divisionen, der Sektorübergreifenden Geschäfte, der Sektorübergreifenden Dienstleistungen, der regionalen Cluster sowie bestimmter zentraler Unternehmenseinheiten, unterstützt durch Bestätigungen des Managements von Einheiten in ihrem Verantwortungsbereich, bestätigen quartalsweise die Ordnungsmäßigkeit der an die Zentrale berichteten Finanzdaten sowie die Funktionsfähigkeit der entsprechenden Kontrollsysteme.

Des Weiteren haben wir ein aus ausgewählten Leitern zentraler Unternehmenseinheiten bestehendes Offenlegungskomitee eingerichtet, das die Aufgabe hat, bestimmte finanzielle und nicht finanzielle Informationen vor der Veröffentlichung zu überprüfen.

Der Aufsichtsrat ist insbesondere durch den Prüfungsausschuss ebenfalls in das Kontrollsystem eingebunden. Der Prüfungsausschuss überwacht insbesondere den Rechnungslegungsprozess, die Wirksamkeit des Kontrollsystems, des Risikomanagementsystems und des internen Revisionssystems sowie die Abschlussprüfung. Zudem obliegt ihm die Vorprüfung der Unterlagen zum Jahresabschluss der Siemens AG und zum Konzernabschluss, und er erörtert den Jahresabschluss der Siemens AG, den Konzernabschluss sowie den zusammengefassten Lagebericht zu diesen Abschlüssen mit dem Vorstand und dem Abschlussprüfer.

Die Tätigkeit unserer internen Revision stellt ein weiteres Element in unserem Kontrollsystem dar. Durch kontinuierliche und konzernweite Prüfungen stellt die interne Revision sicher, dass Richtlinien eingehalten werden und dass die Zuverlässigkeit und die Funktionsfähigkeit unseres Kontrollsystems wie auch die Angemessenheit und Wirksamkeit unseres Risikomanagementsystems gegeben sind.

Entsprechend den Vorgaben des Sarbanes-Oxley Act bestehen darüber hinaus Regeln für bilanzbezogene Beschwerden und ein Ethikkodex (»Code of Ethics«) für Finanzangelegenheiten, der vom Vorstandsvorsitzenden, dem Finanzvorstand, dem Leiter unserer Financial-Reporting- und Controlling-Abteilung sowie von weiteren hochrangigen, in den Abschlussprozess involvierten Mitarbeitern gegengezeichnet werden muss.

## ZUSÄTZLICHE INFORMATIONEN BEZÜGLICH DES EINZELABSCHLUSSES (HGB) DER SIEMENS AG

Die Siemens AG ist als Mutterunternehmen des Siemens-Konzerns in das oben dargestellte konzernweite rechnungslegungsbezogene interne Kontrollsystem eingebunden. Die oben gemachten Angaben gelten grundsätzlich auch für den HGB-Einzelabschluss der Siemens AG.

Der Konzernabschluss wird nach IFRS erstellt. Bei Bedarf (zum Beispiel zum Zweck des handelsrechtlichen Einzelabschlusses oder für steuerliche Zwecke) wird auf Kontenebene auf die jeweiligen nationalen Vorschriften übergeleitet. Damit stellen korrekt ermittelte IFRS-Abschlussinformationen auch für den Einzelabschluss der Siemens AG eine wichtige Grundlage dar. Für die Siemens AG und andere nach HGB bilanzierende Konzernunternehmen ergänzen eine verpflichtend anzuwendende HGB-Abschlussrichtlinie sowie ein HGB-Kontenplan den oben genannten konzeptionellen Rahmen.

Die oben genannten manuellen und systemseitigen Kontrollmaßnahmen gelten grundsätzlich auch für die Überleitung der IFRS-Abschlussinformationen hin zum HGB-Einzelabschluss. Die Angaben bezüglich der systematischen Überwachung der Angemessenheit und Wirksamkeit des rechnungslegungsbezogenen internen Kontrollsystems gelten nur für den IFRS-Konzernabschluss.

## Vergütungsbericht und Erklärung zur Unternehmensführung nach § 289a HGB

Der Vergütungsbericht fasst die Grundsätze zusammen, die auf die Festsetzung der Gesamtvergütung der Mitglieder des Vorstands der Siemens AG Anwendung finden, und erläutert die Struktur sowie die Höhe der Vergütung der Vorstandsmitglieder. Ferner werden die Grundsätze und die Höhe der Vergütung der Mitglieder des Aufsichtsrats beschrieben. Der Vergütungsbericht richtet sich nach den Empfehlungen des Deutschen Corporate Governance Kodex und erfüllt die Anforderungen nach den anwendbaren Vorschriften der §§ 314 Abs. 1 Nr. 6a, 315 Abs. 2 Nr. 4 HGB. Der Vergütungsbericht ist Bestandteil des Anhangs zum Konzernabschluss und somit des testierten Konzernabschlusses. Der Vergütungsbericht findet sich im Abschnitt »Corporate Governance«, der Bestandteil des Geschäftsberichts für das Geschäftsjahr 2010 ist.

Die Erklärung zur Unternehmensführung nach § 289a HGB ist Bestandteil des zusammengefassten Lageberichts. Sie findet sich im Abschnitt »Corporate Governance«, der Bestandteil des Geschäftsberichts für das Geschäftsjahr 2010 ist.

## Weitere Informationen zu zusätzlichen Finanzkennzahlen

Im Geschäftsjahr 2007 haben wir unser Fit42010-Unternehmensprogramm aufgelegt und dies bis zum Ende des Geschäftsjahrs 2010 fortgeführt. Beginnend mit dem Geschäftsjahr 2011, wird One Siemens unser Zielsystem für kapitaleffizientes Wachstum und nachhaltige Wertsteigerung bilden. Für weiterführende Informationen siehe »Geschäft und Rahmenbedingungen – Finanzielle Steuerungsgrößen«.

Im Rahmen von One Siemens haben wir unsere Fit42010-Definitionen für finanzielle Steuerungsgrößen weiterentwickelt, insbesondere die Kapitalrendite (Return on Capital Employed, ROCE) sowie entsprechend unsere Kennzahl angepasstes EBITDA/angepasste industrielle Nettoverschuldung als eine Messgröße für die Kapitalstruktur. Die nachfolgenden Tabellen enthalten eine Darstellung dieser finanziellen Steuerungsgrößen, wie sie unter unserem Fit42010-Programm und nun unter One Siemens definiert sind.

## Kapitalrendite (ROCE)

| (in Mio. EUR)                                                                                  | ROCE<br>Fit42010<br>30. September                        |               | ROCE (angepasst)<br>One Siemens<br>30. September                        |               |
|------------------------------------------------------------------------------------------------|----------------------------------------------------------|---------------|-------------------------------------------------------------------------|---------------|
|                                                                                                | 2010                                                     | 2009          | 2010                                                                    | 2009          |
| <b>Nettovermögen</b>                                                                           |                                                          |               |                                                                         |               |
| Summe Eigenkapital                                                                             | 29.096                                                   | 27.287        | 29.096                                                                  | 27.287        |
| Plus: Langfristige Finanzschulden                                                              | 17.497                                                   | 18.940        | 17.497                                                                  | 18.940        |
| Plus: Kurzfristige Finanzschulden und kurzfristig fällige Anteile langfristiger Finanzschulden | 2.416                                                    | 698           | 2.416                                                                   | 698           |
| Minus: Zahlungsmittel und Zahlungsmitteläquivalente                                            | - 14.108                                                 | - 10.159      | - 14.108                                                                | - 10.159      |
| Plus: Pensionen und ähnliche Verpflichtungen                                                   |                                                          |               | 8.464                                                                   | 5.938         |
| Minus: Siemens-Financial-Services-(SFS-)Finanzschulden                                         |                                                          |               | - 10.028                                                                | - 9.521       |
| Minus: Effekte aus der Bilanzierung von Fair Value Hedges <sup>1</sup>                         |                                                          |               | - 1.518                                                                 | - 1.027       |
| Nettovermögen (fortgeführte Aktivitäten) <sup>2</sup>                                          | 34.901                                                   | 36.766        | 31.819                                                                  | 32.156        |
| <b>Durchschnittliches Nettovermögen (fortgeführte Aktivitäten)<sup>2,3</sup></b>               | <b>37.360</b>                                            | <b>39.100</b> | <b>33.513</b>                                                           | <b>34.676</b> |
|                                                                                                |                                                          |               |                                                                         |               |
|                                                                                                |                                                          |               |                                                                         |               |
|                                                                                                |                                                          |               |                                                                         |               |
|                                                                                                | ROCE<br>Fit42010<br>Geschäftsjahresende<br>30. September |               | ROCE (angepasst)<br>One Siemens<br>Geschäftsjahresende<br>30. September |               |
|                                                                                                | 2010                                                     | 2009          | 2010                                                                    | 2009          |
| <b>Gewinn aus fortgeführten Aktivitäten vor Zinsen nach Steuern</b>                            |                                                          |               |                                                                         |               |
| Gewinn nach Steuern                                                                            | 4.068                                                    | 2.497         | 4.068                                                                   | 2.497         |
| Plus: Übriges Zinsergebnis                                                                     | - 317                                                    | - 111         | - 317                                                                   | - 111         |
| Minus: Übriges Zinsergebnis SFS <sup>4</sup>                                                   |                                                          |               | 339                                                                     | 265           |
| Plus: Zinsaufwendungen für Pensionen und ähnliche Verpflichtungen <sup>5</sup>                 |                                                          |               | 315                                                                     | 270           |
| Minus: Steuern auf Zinsanpassungen <sup>6</sup>                                                | 92                                                       | 41            | - 98                                                                    | - 157         |
| Gewinn vor Zinsen nach Steuern                                                                 | 3.843                                                    | 2.427         | 4.307                                                                   | 2.764         |
| Plus: Gewinn/Verlust aus nicht fortgeführten Aktivitäten (nach Steuern)                        | 44                                                       | - 40          | 44                                                                      | - 40          |
| <b>Gewinn aus fortgeführten Aktivitäten vor Zinsen nach Steuern</b>                            | <b>3.887</b>                                             | <b>2.387</b>  | <b>4.351</b>                                                            | <b>2.724</b>  |
|                                                                                                |                                                          |               |                                                                         |               |
| <b>Kapitalrendite (ROCE) (fortgeführte Aktivitäten)</b>                                        |                                                          |               |                                                                         |               |
| (I) Gewinn aus fortgeführten Aktivitäten vor Zinsen nach Steuern                               | 3.887                                                    | 2.387         | 4.351                                                                   | 2.724         |
| (II) Durchschnittliches Nettovermögen (fortgeführte Aktivitäten) <sup>2,3</sup>                | 37.360                                                   | 39.100        | 33.513                                                                  | 34.676        |
| <b>(I)/(II) ROCE (fortgeführte Aktivitäten)</b>                                                | <b>10,4%</b>                                             | <b>6,1%</b>   | <b>13,0%</b>                                                            | <b>7,9%</b>   |

1 Grundsätzlich werden Finanzschulden zu einem Wert ausgewiesen, der annähernd dem Rückzahlungsbetrag entspricht. Für Finanzschulden, die in einer Sicherungsbeziehung stehen (Fair Value Hedges), wird dieser Wert jedoch hauptsächlich um zinsinduzierte Marktwertänderungen angepasst. Wir ziehen daher diese Marktwertänderung ab, um auf einen Wert zu kommen, der annähernd dem Rückzahlungsbetrag der Finanzschulden entspricht. Wir sind der Überzeugung, dass dieser Wert aussagekräftiger für die oben dargestellte Berechnung ist. Für weiterführende Informationen zu Fair Value Hedges siehe unseren »Anhang zum Konzernabschluss«.

2 Im Geschäftsjahr 2009 beinhaltet das Nettovermögen (fortgeführte Aktivitäten) Anpassungen in Verbindung mit geringfügigen Vermögenswerten und Verbindlichkeiten, die als zur Veräußerung bestimmt waren und zu den nicht fortgeführten Aktivitäten gehörten.

3 Das durchschnittliche Nettovermögen für ein Geschäftsjahr errechnet sich als ein Fünf-Punkt-Durchschnitt aus dem Nettovermögen der jeweiligen fünf Quartale, beginnend mit dem 30. September des vorangegangenen Geschäftsjahrs.

4 Übriges Zinsergebnis SFS ist in Übriges Zinsergebnis enthalten. Die Anpassung des Zählers um Übriges Zinsergebnis SFS erfolgt in Übereinstimmung mit der Anpassung des Nenners um die SFS-Finanzschulden.

5 Für die Geschäftsjahre 2010 und 2009 errechnen sich die Zinsaufwendungen für Pensionen und ähnliche Verpflichtungen auf Basis des gewichteten durchschnittlichen Abzinsungsfaktors zum Bilanzstichtag des Geschäftsjahrs 2009 (5,3%) und des Geschäftsjahrs 2008 (6,2%) (beide sind im »Anhang zum Konzernabschluss« dargestellt), multipliziert mit dem Wert für Pensionen und ähnliche Verpflichtungen zum 30. September 2009 beziehungsweise 2008 in der »Konzernbilanz«.

6 Der effektive Steuersatz für die Berechnung der Steuern auf die Zinsanpassungen ergibt sich aus dem Gewinn aus fortgeführten Aktivitäten vor Ertragsteuern, dividiert durch Ertragsteuern, wie in der »Konzern-Gewinn- und Verlustrechnung« dargestellt.

Aufgrund von Rundungen ist es möglich, dass sich Zahlen nicht genau zur angegebenen Summe aufaddieren und Prozentangaben nicht genau die absoluten Angaben wiedergeben.

## Angepasste industrielle Nettoverschuldung

| (in Mio. EUR)                                                                                           | Fit42010      |                    | One Siemens   |                    |
|---------------------------------------------------------------------------------------------------------|---------------|--------------------|---------------|--------------------|
|                                                                                                         | 2010          | 30. September 2009 | 2010          | 30. September 2009 |
| Kurzfristige Finanzschulden                                                                             | 2.416         | 698                | 2.416         | 698                |
| Plus: Langfristige Finanzschulden <sup>1</sup>                                                          | 17.497        | 18.940             | 17.497        | 18.940             |
| Minus: Zahlungsmittel und Zahlungsmitteläquivalente                                                     | - 14.108      | - 10.159           | - 14.108      | - 10.159           |
| Minus: Kurzfristige Zur Veräußerung verfügbare finanzielle Vermögenswerte                               | - 246         | - 170              | - 246         | - 170              |
| <b>Nettoverschuldung</b>                                                                                | <b>5.560</b>  | <b>9.309</b>       | <b>5.560</b>  | <b>9.309</b>       |
| Minus: SFS-Finanzschulden                                                                               | - 10.028      | - 9.521            | - 10.028      | - 9.521            |
| Plus: Finanzierungsstatus wesentlicher Pensionen                                                        | 6.357         | 4.015              |               |                    |
| Plus: Finanzierungsstatus wesentlicher pensionsähnlicher Verpflichtungen                                | 738           | 646                |               |                    |
| Plus: Pensionen und ähnliche Verpflichtungen                                                            |               |                    | 8.464         | 5.938              |
| Plus: Kreditgarantien                                                                                   | 597           | 313                | 597           | 313                |
| Minus: 50 % des Nominalbetrags der Hybridschuldverschreibung <sup>2</sup>                               | - 886         | - 862              | - 886         | - 862              |
| Minus: Effekte aus der Bilanzierung von Fair Value Hedges <sup>3</sup>                                  | - 1.518       | - 1.027            | - 1.518       | - 1.027            |
| <b>(I) Angepasste industrielle Nettoverschuldung</b>                                                    | <b>819</b>    | <b>2.873</b>       | <b>2.189</b>  | <b>4.150</b>       |
| <b>(II) Angepasstes EBITDA (fortgeführte Aktivitäten)</b>                                               | <b>10.034</b> | <b>9.219</b>       | <b>10.034</b> | <b>9.219</b>       |
| <b>(I)/(II) Angepasste industrielle Nettoverschuldung/angepasstes EBITDA (fortgeführte Aktivitäten)</b> | <b>0,08</b>   | <b>0,31</b>        | <b>0,22</b>   | <b>0,45</b>        |

- Langfristige Finanzschulden beinhalten Effekte aus der Bilanzierung von Fair Value Hedges in Höhe von 1.518 Mio. EUR für das Geschäftsjahr 2010 (im Vj. 1.027 Mio. EUR).
- Die Korrektur betreffend unsere Hybridschuldverschreibung berücksichtigt die von Ratingagenturen angewandte Berechnung dieser Finanzkennzahl, nach der 50 % unserer Hybridschuldverschreibung als Eigenkapital und 50 % als Finanzschulden klassifiziert werden. Diese Zuordnung folgt den Besonderheiten unserer Hybridschuldverschreibung, wie langen Laufzeiten und Nachrangigkeit zu allen erstrangigen Anleihen und Verschuldungsverpflichtungen.
- Grundsätzlich werden Finanzschulden zu einem Wert ausgewiesen, der annähernd dem Rückzahlungsbetrag entspricht. Für Finanzschulden, die in einer Sicherungsbeziehung stehen (Fair Value Hedges), wird dieser Wert jedoch hauptsächlich um zinsinduzierte Marktwertänderungen angepasst. Wir ziehen daher diese Marktwertänderung ab, um auf einen Wert zu kommen, der annähernd dem Rückzahlungsbetrag der Finanzschulden entspricht. Wir sind der Überzeugung, dass dieser Wert aussagekräftiger für die oben dargestellte Berechnung ist. Für weiterführende Informationen zu Fair Value Hedges siehe unseren »Anhang zum Konzernabschluss«.

Aufgrund von Rundungen ist es möglich, dass sich Zahlen nicht genau zur angegebenen Summe aufaddieren und Prozentangaben nicht genau die absoluten Angaben wiedergeben.

## DEFINITIONEN WEITERER FINANZKENNZAHLEN

In Ergänzung der oben beschriebenen finanziellen Steuerungsgrößen verwenden wir auch weitere Kenngrößen, zum Beispiel den Auftragseingang und den Auftragsbestand zur Abschätzung unseres künftigen Umsatzpotenzials. Wir definieren und ermitteln den Auftragseingang sowie den Auftragsbestand wie folgt:

Gemäß unseren Grundsätzen für den Ausweis von Auftragsengängen erfassen wir einen **Auftragseingang** grundsätzlich zu dem Zeitpunkt, zu dem wir einen Vertrag eingehen, den wir als »rechtswirksam und verbindlich« erachten. Hierfür müssen verschiedene Kriterien erfüllt sein. Wird ein Vertrag als rechtswirksam und verbindlich angesehen, wird er grundsätzlich mit dem Gesamtauftragswert erfasst. Als Gesamtauftragswert gilt der vereinbarte Preis beziehungsweise das vereinbarte Entgelt für jenen Teil des Vertrags, für den die Lieferung von Gütern beziehungsweise die Erbringung von Leistungen unwiderruflich vereinbart ist. Künftige Umsätze aus langfristigen Dienstleistungs-, Wartungs- und Outsour-

cing-Verträgen werden nur dann mit dem Gesamtauftragswert im Auftragseingang berücksichtigt, wenn die Einhaltung der Gesamtvertragslaufzeit (zum Beispiel wegen hoher Ausstiegshürden für den Kunden) als hinreichend sicher zu betrachten ist. Die Erfassung des Auftragseingangs erfolgt grundsätzlich unmittelbar zum Zeitpunkt der Erfüllung der Kriterien für die Rechtswirksamkeit und Verbindlichkeit des betreffenden Vertrags. Die einzige Ausnahme stellen Aufträge mit kurzen Gesamtlaufzeiten dar, für die eine separate Auftragseingangsführung keine signifikanten Zusatzinformationen zur Geschäftsentwicklung liefern würde. Für diese Aufträge wird der Auftragseingang im Zeitpunkt der Umsatzlieferung erfasst.

Der **Auftragsbestand** stellt die künftigen Umsätze des Unternehmens aus bereits erfassten Aufträgen dar. Der Auftragsbestand ergibt sich rechnerisch aus dem Endbestand des Auftragsbestands des Vorjahrs, zuzüglich des Auftragseingangs des aktuellen Geschäftsjahrs, abzüglich des Umsatzausweises des aktuellen Geschäftsjahrs. Stornierungen oder Änderun-

gen von Aufträgen aus dem laufenden Geschäftsjahr reduzieren den im aktuellen Quartal ausgewiesenen Auftragseingang. Ein bereits veröffentlichter Auftragseingang wird nachträglich nicht angepasst. Wird ein Auftrag aus Vorjahren storniert, erfolgt grundsätzlich keine Anpassung im Auftragseingang des aktuellen Quartals beziehungsweise Geschäftsjahrs, sondern im Auftragsbestand, wenn die Anpassung wesentlich ist. Zusätzlich zu Stornierungen wirken Konsolidierungskreisänderungen sowie Währungsumrechnungseffekte auf den Auftragsbestand.

Für die Erfassung von Informationen über den Auftragseingang und den Auftragsbestand sowie die Art der Berechnung dieser Größen existieren keine unternehmensübergreifenden Standards. Dies kann dazu führen, dass unser Auftragseingang und unser Auftragsbestand mit den unter denselben oder ähnlichen Bezeichnungen veröffentlichten Daten anderer Unternehmen nicht vergleichbar sind. Auftragseingang und Auftragsbestand unterliegen unseren internen Dokumentations- und Prüfungsanforderungen. Es ist möglich, dass wir unsere Regelungen für die Erfassung des Auftragseingangs beziehungsweise des Auftragsbestands in der Zukunft ohne vorherige Ankündigung ändern.

## Siemens AG (Erläuterungen auf Basis HGB)

Der Lagebericht der Siemens AG und der Konzernlagebericht über das Geschäftsjahr 2010 sind nach § 315 Abs. 3 HGB in Verbindung mit § 298 Abs. 3 HGB zusammengefasst. Der Jahresabschluss der Siemens AG nach HGB und der Zusammengefasste Lagebericht werden zeitgleich beim elektronischen Bundesanzeiger veröffentlicht.

Die im Mai 2009 veröffentlichten Vorschriften des Bilanzrechtsmodernisierungsgesetzes (BilMoG) wurden für die Siemens AG im Geschäftsjahr 2010 erstmals und vorzeitig angewendet. Dabei wurde auf die Anpassung der Vorjahreswerte in Anwendung einer Erleichterungsregelung des BilMoG in den meisten Fällen verzichtet. Durch die Erstanwendung der Vorschriften des BilMoG zum 1. Oktober 2009 wurden sowohl das außerordentliche Ergebnis als auch die Gewinnrücklagen beeinflusst.

### GESCHÄFT UND RAHMENBEDINGUNGEN

Die Siemens AG mit Sitz in Berlin und München ist die Muttergesellschaft des Siemens-Konzerns. In einem großen Beteiligungsportfolio werden die industriellen Aktivitäten sowie die Finanzaktivitäten des Konzerns gebündelt. Die Aufteilung in Segmente entspricht grundsätzlich der des Konzerns und umfasst die Sektoren Industry, Energy und Healthcare. Die Division OSRAM betreibt ihr Geschäft nicht in der Siemens AG, sondern in einer eigenständigen rechtlichen Einheit.

Die zuvor genannten Sektoren wickeln ihr Stammgeschäft mit den Kunden in Deutschland und den Export aus Deutschland über die Siemens AG ab. Der verbleibende Teil des weltweiten Geschäfts wird über Wertschöpfung in Tochterunternehmen erbracht, deren Anteile von der Siemens AG direkt oder indirekt gehalten werden.

Daneben bestehen die sektorübergreifenden Aktivitäten von Siemens IT Solutions and Services sowie von Siemens Financial Services (SFS). Das Geschäft von Siemens IT Solutions and Services befindet sich in einer Phase strategischer Neuausrichtung und wird ab dem 1. Oktober 2010 in eine rechtlich selbstständige Einheit überführt, die vollständig im Besitz der Siemens AG sein wird. Die Aktivitäten von SFS finden weitgehend außerhalb der Siemens AG statt.



Das Segment Equity Investments umfasst im Allgemeinen Beteiligungen, die aus strategischen Gründen keinem Sektor, Sektorübergreifenden Geschäft und auch nicht Siemens Real Estate (SRE), Pensionen oder der Konzern-Treasury zugeordnet sind. Zu den wesentlichen Beteiligungen, an denen die Siemens AG direkt beteiligt ist, gehören Nokia Siemens Networks B.V. (NSN), BSH Bosch und Siemens Hausgeräte GmbH (BSH), Enterprise Networks Holding, B.V. (EN) sowie GIG Holding GmbH (vormals ARQUES Value Development GmbH).

Das Immobilienvermögen wird von der Einheit Siemens Real Estate (SRE) verwaltet und an die Segmente vermietet.

Die Konzernzentrale mit den Zentralen Unternehmenseinheiten für Unternehmensentwicklung, Finanzen und Controlling, Kommunikation, Technologie, Informationstechnologie und Beschaffung sowie der Abteilung Nachhaltigkeit gehört ebenfalls zur Siemens AG und ist in deren Finanzkennzahlen enthalten.

Die wirtschaftlichen Rahmenbedingungen entsprechen im Wesentlichen denen des Konzerns und werden im Abschnitt »Geschäft und Rahmenbedingungen – Wirtschaftliche Rahmenbedingungen« ausführlich beschrieben.

## AUFTRAGSLAGE UND UMSATZ

Im Geschäftsjahr 2010 erzielte die Siemens AG einen um 9% höheren Umsatz von rund 28,2 Mrd. EUR, gegenüber 25,9 Mrd. EUR im Vorjahr. Der Anstieg ist vor allem auf das verbesserte Geschäftsklima und auf die Verschmelzung von bestimmten Tochterunternehmen auf die Siemens AG, insbesondere der Flender AG sowie der Siemens Building Technologies GmbH & Co. oHG, beide zugehörig zum Sektor Industry, zurückzuführen:

| Umsatz Siemens AG                 |                                      |               |
|-----------------------------------|--------------------------------------|---------------|
| (in Mio. EUR)                     | Geschäftsjahresende<br>30. September |               |
|                                   | 2010                                 | 2009          |
| Industry                          | 13.606                               | 11.519        |
| Energy                            | 9.866                                | 9.354         |
| Healthcare                        | 3.938                                | 3.839         |
| Siemens IT Solutions and Services | 1.208                                | 1.381         |
| Siemens Real Estate               | 889                                  | 809           |
| abzüglich interne Umsätze         | - 1.293                              | - 1.023       |
|                                   | <b>28.214</b>                        | <b>25.879</b> |

31% (im Vj. 30%) des Umsatzes wurden mit Kunden in Deutschland erwirtschaftet. Der Exportanteil betrug 69% (im Vj. 70%); davon entfielen in Relation zum Gesamtumsatz auf die Region Europa (ohne Deutschland), GUS, Afrika, Naher und Mittlerer Osten 39% (im Vj. 40%), auf die Region Asien, Australien 21% (im Vj. 20%) und auf Amerika 9% (im Vj. 10%) Umsatzanteil.

Die nachfolgende Tabelle zeigt den Umsatz der Siemens AG nach Regionen:

| Umsatz Siemens AG – nach Regionen                            |                                      |               |
|--------------------------------------------------------------|--------------------------------------|---------------|
| (in Mio. EUR)                                                | Geschäftsjahresende<br>30. September |               |
|                                                              | 2010                                 | 2009          |
| Europa, GUS <sup>1</sup> , Afrika, Naher und Mittlerer Osten | 19.702                               | 18.057        |
| <i>davon Deutschland</i>                                     | 8.848                                | 7.636         |
| Amerika                                                      | 2.625                                | 2.553         |
| <i>davon USA</i>                                             | 1.689                                | 1.855         |
| Asien, Australien                                            | 5.887                                | 5.269         |
| <i>davon China</i>                                           | 2.440                                | 2.159         |
| <i>davon Indien</i>                                          | 501                                  | 857           |
|                                                              | <b>28.214</b>                        | <b>25.879</b> |

<sup>1</sup> Gemeinschaft Unabhängiger Staaten.

Der Auftragseingang für die Siemens AG belief sich im Geschäftsjahr 2010 auf 27,5 Mrd. EUR, gegenüber 27,7 Mrd. EUR im Vorjahr, was einem Rückgang von weniger als 1% entspricht.

## ERTRAGSLAGE

Im Geschäftsjahr 2010 erzielte die Siemens AG einen um 9% höheren Umsatz von rund 28,2 Mrd. EUR, gegenüber 25,9 Mrd. EUR im Vorjahr. Auch aufgrund volumenbedingter Degressionseffekte erhöhten sich die Umsatzkosten lediglich unterproportional. Das Bruttoergebnis vom Umsatz stieg somit um 977 Mio. EUR, und die Bruttomarge verbesserte sich auf nunmehr 26,2%, gegenüber 24,8% im Vorjahr.

### Verkürzte Gewinn- und Verlustrechnung der Siemens AG

| (in Mio. EUR)                                                        | Geschäftsjahresende<br>30. September |               |
|----------------------------------------------------------------------|--------------------------------------|---------------|
|                                                                      | 2010                                 | 2009          |
| <b>Umsatzerlöse</b>                                                  | <b>28.214</b>                        | <b>25.879</b> |
| Umsatzkosten                                                         | - 20.812                             | - 19.454      |
| <b>Bruttoergebnis vom Umsatz</b>                                     | <b>7.402</b>                         | <b>6.425</b>  |
| Forschungs- und Entwicklungskosten                                   | - 2.311                              | - 2.362       |
| Vertriebs- und allgemeine<br>Verwaltungskosten                       | - 3.698                              | - 2.959       |
| Sonstiges betriebliches Ergebnis                                     | - 101                                | - 363         |
| Finanzergebnis<br>davon Beteiligungsergebnis<br>3.596 (im Vj. 1.601) | 2.992                                | 1.229         |
| <b>Ergebnis der gewöhnlichen<br/>Geschäftstätigkeit</b>              | <b>4.284</b>                         | <b>1.970</b>  |
| Außerordentliches Ergebnis                                           | - 1.652                              | -             |
| Ertragsteuern                                                        | - 71                                 | - 179         |
| <b>Jahresüberschuss</b>                                              | <b>2.561</b>                         | <b>1.791</b>  |
| Gewinnvortrag                                                        | 75                                   | 83            |
| Einstellungen in andere Gewinnrücklagen                              | - 168                                | - 411         |
| <b>Bilanzgewinn</b>                                                  | <b>2.468</b>                         | <b>1.463</b>  |

Die Aufwendungen für Forschung und Entwicklung haben sich gegenüber dem Vorjahr nur unwesentlich verringert. Weitere Informationen hierzu sind im nachfolgenden Abschnitt »– Forschung und Entwicklung« enthalten.

Die Vertriebs- und Allgemeinen Verwaltungskosten erhöhten sich um 739 Mio. EUR auf 3.698 Mio. EUR, insbesondere aufgrund der oben erwähnten Verschmelzungen von Tochterunternehmen auf die Siemens AG mit Wirkung für das gesamte Geschäftsjahr. Ferner sind im Vorjahr Auflösungen von Rückstellungen in Zusammenhang mit Risikovorsorgen enthalten. Der Anteil der Vertriebs- und Allgemeinen Verwaltungskosten im Verhältnis zum Umsatz erhöhte sich um 1,7 auf 13,1%.

Die Verbesserung beim Sonstigen betrieblichen Ergebnis resultiert sowohl aus einem Anstieg der Sonstigen betrieblichen Erträge als auch aus einem Rückgang der Sonstigen betrieblichen Aufwendungen gegenüber dem Vorjahr.

Der Anstieg der Sonstigen betrieblichen Erträge ergab sich aus einer Verminderung der mittelbaren Pensionsverpflichtung gegenüber der Siemens Pensionsfonds AG in Höhe von 234 Mio. EUR, die im Wesentlichen auf die positive Marktwertentwicklung des Vermögens der Siemens Pensionsfonds AG

im abgelaufenen Geschäftsjahr zurückzuführen war, höheren Erträgen in Verbindung mit Compliance-bezogenen Themen, einschließlich eines Ertrags von 84 Mio. EUR aus der Einigung mit den D&O-Versicherern, eines Nettoertrags in Zusammenhang mit der Einigung mit ehemaligen Vorstands- und Aufsichtsratsmitgliedern von Siemens sowie Erträgen in Höhe von 40 Mio. EUR aus der Rückführung von durch Behörden arretierter Beträge. Im Vorjahresergebnis waren höhere Erträge aus dem Verkauf von Grundstücken und Gebäuden enthalten, insbesondere aus der Veräußerung der Siemens Wohnungsbau-Gesellschaft, die zunächst auf die Siemens AG verschmolzen wurde, in Höhe von 229 Mio. EUR und eine damit in Zusammenhang stehende Auflösung des Sonderpostens mit Rücklageanteil in Höhe von insgesamt 68 Mio. EUR.

Der Rückgang der Sonstigen betrieblichen Aufwendungen resultierte im Wesentlichen aus im Vorjahr angefallenen Aufwendungen für externe Beratungsleistungen in Zusammenhang mit der Aufarbeitung der Compliance-Themen in Höhe von 95 Mio. EUR sowie der im Vorjahr erfolgten Bildung einer Rückstellung für Zahlungen an bestimmte, im Bereich der Korruptionsbekämpfung tätige Organisationen innerhalb von 15 Jahren in Höhe von 68 Mio. EUR.

Das Finanzergebnis hat sich gegenüber dem Vorjahr um 1.763 Mio. EUR verbessert, was insbesondere auf ein um 1.995 Mio. EUR erhöhtes Beteiligungsergebnis zurückzuführen ist. Das Zinsergebnis verbesserte sich um 56 Mio. EUR, während das Übrige Finanzergebnis sich um 288 Mio. EUR verschlechtert hat.

Das Beteiligungsergebnis profitierte von einer Gewinnausschüttung der Siemens Beteiligungsverwaltung GmbH & Co. OHG in Höhe von 1.385 Mio. EUR sowie von im Vorjahresvergleich geringeren Abschreibungen auf Beteiligungen. Im Geschäftsjahr 2009 war auf die Beteiligung NSN eine Abschreibung in Höhe von 408 Mio. EUR vorgenommen worden, während das Geschäftsjahr 2010 eine Abschreibung auf die Beteiligung an der griechischen Landesgesellschaft in Höhe von 122 Mio. EUR enthält. Höhere Erträge aus Beteiligungen und aus Gewinnabführungen mit verbundenen Unternehmen trugen ebenfalls zur Verbesserung bei.

Das Übrige Finanzergebnis hat sich im Wesentlichen innerhalb der Übrigen finanziellen Aufwendungen aufgrund einer Vorsorge für Marktwertänderungen von Zinsderivaten wegen der imparitätischen Bewertung sowie aufgrund von realisierten Marktwertänderungen bei Währungs- und Zinsderivaten

verschlechtert. Im Vorjahr waren Verluste in Zusammenhang mit Optimierungen und der Veräußerung von Fondsanteilen in Höhe von 246 Mio. EUR enthalten.

In den Übrigen finanziellen Erträgen ergab sich ein Zuwachs bei Dividendenerträgen in Höhe von 245 Mio. EUR, während im Vorjahr Erträge aus der Optimierung des Fondsvermögens sowie aus der Veräußerung von Fondsanteilen in Höhe von 189 Mio. EUR enthalten waren. Abschreibungen auf Ausleihungen und Wertpapiere des Umlaufvermögens waren im abgelaufenen Geschäftsjahr nur in sehr geringem Umfang erforderlich, während im Vorjahr die Bewertung auf eigene Aktien in Höhe von 118 Mio. EUR in den Abschreibungen auf Wertpapiere des Umlaufvermögens enthalten war.

Das Ergebnis der gewöhnlichen Geschäftstätigkeit hat sich insgesamt um 2.314 Mio. EUR auf 4.284 Mio. EUR verbessert.

Im Außerordentlichen Ergebnis sind Aufwendungen in Zusammenhang mit einer Rückstellung für drohende Verluste in Höhe von 781 Mio. EUR sowie Aufwendungen für den Abschluss von Maßnahmen zur Personalanpassung in Höhe von 336 Mio. EUR enthalten, jeweils in Zusammenhang mit der strategischen Neuorientierung und der damit verbundenen Ausgliederung von Siemens IT Solutions and Services ab dem 1. Oktober 2010 in eine rechtlich selbstständige Einheit, die vollständig im Besitz der Siemens AG sein wird. Zudem sind die Umstellungseffekte aus der erstmaligen Anwendung des BilMoG in Höhe von 535 Mio. EUR enthalten, insbesondere in Zusammenhang mit der Bilanzierung von Übrigen Rückstellungen sowie Rückstellungen für Pensionen und ähnliche Verpflichtungen. Dementsprechend wurden Nettoaufwendungen von 331 Mio. EUR aus der Zuführung zu Rückstellungen aufgrund der nunmehr erforderlichen Berücksichtigung von Preis- und Kostensteigerungen erfasst. Diese Aufwendungen enthalten insbesondere die Rückstellung für Dekontaminationskosten des Werks für die Produktion von Uran und Mischoxid-Brennelementen in Hanau, Deutschland, sowie des nuklearen Forschungs- und Servicezentrums in Karlstein, Deutschland. Außerdem wurden Aufwendungen in Höhe von 190 Mio. EUR aufgrund einer Erhöhung der Rückstellung für Pensionen und ähnliche Verpflichtungen entsprechend den Bewertungsvorschriften des BilMoG erfasst. Diese Bewertungsvorschriften umfassen unter anderem das Wahlrecht zur Anwendung des durchschnittlichen Marktzinssatzes bei einer angenommenen Restlaufzeit von 15 Jahren, wie er von der Bundesbank ermittelt und bekannt gegeben wird, sowie das Erfordernis zur Berücksichtigung zukünftig erwarteter

Gehalts- und Rententrends. Weitere Informationen in Zusammenhang mit den Auswirkungen aus der erstmaligen Anwendung der Vorschriften des BilMoG auf das außerordentliche Ergebnis befinden sich im Anhang zum Jahresabschluss der Siemens AG.

Die laufenden Ertragsteueraufwendungen haben sich insbesondere aufgrund von Steuererstattungen für Vorjahre auf 121 Mio. EUR gegenüber 158 Mio. EUR im Geschäftsjahr 2009 verringert. Demgegenüber hat sich der Steueraufwand für die latenten Ertragsteuern deutlich auf 457 Mio. EUR gegenüber 21 Mio. EUR im Vorjahr erhöht. Dieser Anstieg ergab sich aus latenten Steuern in Zusammenhang mit der Veränderung von Bewertungsunterschieden bei Pensionsrückstellungen infolge von Anpassungen mittelbarer Verpflichtungen aufgrund der Anwendung des BilMoG zu Beginn des Geschäftsjahrs 2010. Ein weiterer Rückgang der aktiven latenten Steuern ergab sich aufgrund der Verminderung von steuerlichen Verlustvorträgen, die zum 1. Oktober 2009 erstmals infolge von BilMoG über die Gewinnrücklagen gebildet wurden. Die Ertragsteuern auf das negative außerordentliche Ergebnis betreffen mit 507 Mio. EUR sowohl laufende als auch latente Steuerentlastungen, von denen ein Teil, 165 Mio. EUR, auf die BilMoG-Umstellung entfällt.

Nach Abzug von Steuern ergab sich ein Jahresüberschuss von 2.561 Mio. EUR, gegenüber 1.791 Mio. EUR im vorangegangenen Geschäftsjahr.

Als Mutterunternehmen des Siemens-Konzerns ist die Siemens AG in die Konzernsteuerung, die auf den International Financial Reporting Standards (IFRS) basiert, integriert. Weitere Informationen hierzu befinden sich im Abschnitt »Geschäft und Rahmenbedingungen – Finanzielle Steuerungsgrößen«.

## VERMÖGENS- UND FINANZLAGE

Die Bilanzsumme der Siemens AG hat sich gegenüber dem Vorjahr um insgesamt 3.185 Mio. EUR erhöht. Dieser Anstieg resultiert im Wesentlichen aus zwei gegenläufigen Effekten. Der Anstieg des operativen Geschäfts sowie die zuvor genannten Verschmelzungseffekte bewirkten einen starken Anstieg der Bilanzsumme, während die Umstellungseffekte in Zusammenhang mit dem Übergang auf das BilMoG, insbesondere aufgrund der Ausweisänderung der Eigenen Anteile, eine verkürzende Wirkung auf die Bilanzsumme erzeugt haben.

Weitere Einzelheiten hierzu sind im Anhang zum Jahresabschluss der Siemens AG erläutert, der im elektronischen Bundesanzeiger veröffentlicht wird.

#### Bilanzstruktur der Siemens AG

| (in Mio. EUR)                                                                                                   | 30. September |               |
|-----------------------------------------------------------------------------------------------------------------|---------------|---------------|
|                                                                                                                 | 2010          | 2009          |
| <b>Aktiva</b>                                                                                                   |               |               |
| <b>Anlagevermögen</b>                                                                                           |               |               |
| Immaterielle Vermögensgegenstände und Sachanlagen                                                               | 2.362         | 1.960         |
| Finanzanlagen                                                                                                   | 36.364        | 35.944        |
|                                                                                                                 | <b>38.726</b> | <b>37.904</b> |
| <b>Umlaufvermögen</b>                                                                                           |               |               |
| Forderungen und Sonstige Vermögensgegenstände                                                                   | 11.282        | 10.347        |
| Wertpapiere                                                                                                     | 1             | 3.024         |
| Flüssige Mittel                                                                                                 | 6.125         | 3.480         |
|                                                                                                                 | <b>17.408</b> | <b>16.851</b> |
| <b>Rechnungsabgrenzungsposten</b>                                                                               | <b>52</b>     | <b>49</b>     |
| <b>Aktive latente Steuern</b>                                                                                   | <b>3.734</b>  | <b>1.961</b>  |
| <b>Aktiver Unterschiedsbetrag aus der Vermögensverrechnung</b>                                                  | <b>30</b>     | <b>-</b>      |
| <b>Summe Aktiva</b>                                                                                             | <b>59.950</b> | <b>56.765</b> |
| <b>Passiva</b>                                                                                                  |               |               |
| <b>Eigenkapital</b>                                                                                             | <b>19.848</b> | <b>19.625</b> |
| <b>Sonderposten mit Rücklageanteil</b>                                                                          | <b>803</b>    | <b>808</b>    |
| <b>Rückstellungen</b>                                                                                           |               |               |
| Pensionen und ähnliche Verpflichtungen                                                                          | 9.547         | 9.628         |
| Übrige Rückstellungen                                                                                           | 7.654         | 6.339         |
|                                                                                                                 | <b>17.201</b> | <b>15.967</b> |
| <b>Verbindlichkeiten</b>                                                                                        |               |               |
| Verbindlichkeiten gegenüber Kreditinstituten                                                                    | 38            | 49            |
| Erhaltene Anzahlungen auf Bestellungen                                                                          | 2.354         | 1.772         |
| Verbindlichkeiten aus Lieferungen und Leistungen gegenüber verbundenen Unternehmen und Übrige Verbindlichkeiten | 19.438        | 18.484        |
|                                                                                                                 | <b>21.830</b> | <b>20.305</b> |
| <b>Rechnungsabgrenzungsposten</b>                                                                               | <b>268</b>    | <b>60</b>     |
| <b>Summe Passiva</b>                                                                                            | <b>59.950</b> | <b>56.765</b> |

Das Anlagevermögen hat sich gegenüber dem Vorjahr um 822 Mio. EUR erhöht. Die Veränderung bei den Immateriellen Vermögensgegenständen und Sachanlagen resultiert zum überwiegenden Teil aus den zuvor erwähnten Verschmelzungen von Tochtergesellschaften auf die Siemens AG. Bei den Finanzanlagen waren die Wandlung eines zuvor an NSN gewährten Gesellschafterdarlehens in Eigenkapital sowie weitere Kapitalmaßnahmen bei Tochterunternehmen für die Erhöhung ursächlich.

Das Umlaufvermögen hat sich gegenüber dem Vorjahr um 557 Mio. EUR erhöht. Der Anstieg bei den Forderungen und Sonstigen Vermögensgegenständen verteilt sich auf Forderungen aus Lieferungen und Leistungen mit 366 Mio. EUR, Forderungen gegenüber verbundenen Unternehmen mit 229 Mio. EUR sowie Übrige Forderungen und sonstige Vermögensgegenstände mit 340 Mio. EUR. Die im Vorjahr in der Bilanzposition Wertpapiere ausgewiesenen Eigenen Aktien wurden in Anwendung des BilMoG offen vom Eigenkapital abgesetzt. In der Folge verminderte sich der Ausweis der Wertpapiere um 3.023 Mio. EUR. Die Flüssigen Mittel haben sich aufgrund der positiven Geschäftsentwicklung sowie aufgrund des Anstiegs der Erhaltenen Anzahlungen auf Bestellungen um 2.645 Mio. EUR erhöht.

Die Aktiven latenten Steuern wurden aus dem Umlaufvermögen in einen eigenständigen Bilanzposten umgegliedert, und der Vorjahreswert wurde entsprechend angepasst. Der Anstieg der Aktiven latenten Steuern resultiert aus temporären Differenzen zwischen handelsrechtlichen und steuerrechtlichen Wertansätzen sowie aus berücksichtigungsfähigen Verlustvorträgen.

Das Eigenkapital der Siemens AG hat sich auf 19.848 Mio. EUR leicht erhöht. Der Anstieg ist auf den Jahresüberschuss zurückzuführen, der jedoch weitestgehend kompensiert wurde durch negative Effekte aus der Erstanwendung der Vorschriften des BilMoG. Entsprechend verringerten sich die Gewinnrücklagen um 2.880 Mio. EUR aufgrund der Anforderung, die Eigenen Anteile offen vom Eigenkapital abzusetzen. Dieser Rückgang wurde nur zum Teil durch einen positiven Effekt in Höhe von 1.779 Mio. EUR ausgeglichen, der im Wesentlichen in Zusammenhang steht mit dem nach BilMoG zulässigen Ausweis latenter Steuern auf zeitliche Bewertungsunterschiede sowie auf Verlustvorträge.

Weitere Informationen zu den Auswirkungen aus der Erstanwendung der Vorschriften des BilMoG auf die Bilanz der Siemens AG sind im Jahresabschluss der Siemens AG enthalten.

Die Eigenkapitalquote verringerte sich auf 33,1% (im Vj. 34,6%).

Siemens hat von dem Wahlrecht unter BilMoG Gebrauch gemacht, den Sonderposten mit Rücklagenanteil fortzuführen. Dieser Sonderposten mit Rücklagenanteil verringerte sich im Geschäftsjahr 2010 um 5 Mio. EUR auf 803 Mio. EUR. Die Rückstellungen für Pensionen und ähnliche Verpflichtungen haben sich um 81 Mio. EUR vermindert, und die Übrigen Rückstellungen haben sich um 1.315 Mio. EUR erhöht. Der Anstieg der Übrigen Rückstellungen erklärt sich im Wesentlichen aus der zuvor beschriebenen Rückstellung für drohende Verluste in Zusammenhang mit der strategischen Neuorientierung und der damit verbundenen Ausgliederung von Siemens IT Solutions and Services. Die Verbindlichkeiten haben sich um 1.525 Mio. EUR erhöht, was im Wesentlichen auf höhere erhaltene Anzahlungen auf Bestellungen und auf die konzerninterne Finanzierungstätigkeit sowie einen Anstieg der Übrigen Verbindlichkeiten zurückzuführen ist. In den Übrigen Verbindlichkeiten ist eine Verbindlichkeit in Zusammenhang mit den oben erwähnten Maßnahmen zur Personalanpassung bei Siemens IT Solutions and Services in Höhe von 336 Mio. EUR enthalten.

## DIVIDENDE

Die Siemens AG als Muttergesellschaft des Siemens-Konzerns weist für das Geschäftsjahr 2010 einen nach dem deutschen Handelsgesetzbuch (HGB) ermittelten Bilanzgewinn von 2.468 (im Vj. 1.463) Mio. EUR aus.

Der Vorstand wird in der Hauptversammlung am 25. Januar 2011 mit Zustimmung des Aufsichtsrats vorschlagen, den Bilanzgewinn der Siemens Aktiengesellschaft aus dem abgelaufenen Geschäftsjahr 2010 wie folgt zu verwenden: Ausschüttung einer Dividende von 2,70 EUR je für das abgelaufene Geschäftsjahr 2010 zum Zeitpunkt der Hauptversammlung dividendenberechtigte Stückaktie und Gewinnvortrag des verbleibenden Differenzbetrags. Im Geschäftsjahr 2009 war eine Dividende von 1,60 EUR je dividendenberechtigte Stückaktie ausgeschüttet worden.

## EINSATZ VON FINANZINSTRUMENTEN

Die Siemens AG erfüllt im Rahmen des Managements von Finanzmarktrisiken eine zentrale Aufgabe innerhalb des Siemens-Konzerns, indem sie die Risiken, die hauptsächlich aus Wechselkurs-, Zins und Commodity-Preisschwankungen resultieren, durch den Einsatz einer Vielfalt von derivativen Finanzinstrumenten begrenzt beziehungsweise eliminiert.

Zur Absicherung der Risiken, die aus den Schwankungen der in Fremdwährung lautenden Vermögensgegenstände und Schulden sowie schwebenden Geschäften und antizipierten Transaktionen resultieren, verfolgt das Unternehmen vorwiegend einen konzernweiten Portfolioansatz. Bei den dabei eingesetzten Finanzinstrumenten handelt es sich im Wesentlichen um Devisentermingeschäfte sowie kombinierte Zins-Währungs-Swaps und Devisenoptionen.

Im Rahmen der konzernweiten Steuerung von Zinsrisiken setzt die Siemens AG verschiedene Zinssicherungsgeschäfte wie Zinsswaps, Caps und Floors sowie Zinsfutures ein. Diese dienen überwiegend der Absicherung gegen Zinsänderungsrisiken für die über ausländische Tochterunternehmen der Siemens AG begebenen Finanzschulden des Konzerns sowie der Optimierung des Zinsergebnisses beziehungsweise festgelegter Zins-Benchmarks im Rahmen des Zinsrisikomanagements.

Derivative Finanzinstrumente innerhalb der Siemens AG dienen in geringerem Umfang auch der Sicherung von Commodity-Preisrisiken aus Beschaffungsgeschäften. Die im Rahmen des Commodity Hedging eingesetzten Instrumente umfassen Termingeschäfte und Optionen.

## MITARBEITER

Die Anzahl der Mitarbeiter am Abschlussstichtag betrug 104.050 (im Vj. 95.233). Der Anstieg resultiert im Wesentlichen aus dem Übergang von Mitarbeitern des Sektors Industry auf die Siemens AG im Rahmen von Verschmelzungen.

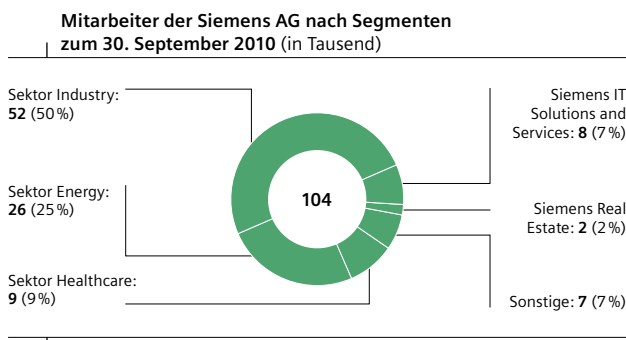

Unsere Mitarbeiter leisten einen entscheidenden Beitrag zum Erfolg des Unternehmens. Deshalb ist es unser Ziel, weltweit die besten und fähigsten Mitarbeiter zu gewinnen, zu fördern und sie an unser Unternehmen zu binden. Unsere nachhaltige Personalpolitik setzt dabei Schwerpunkte bei Diversity, also der Vielfalt unserer Mitarbeiter, bei Lernen und Weiterbildung, bei der Förderung einer Hochleistungskultur sowie bei Arbeitssicherheit und Healthcare Management. Ein faires Miteinander von Unternehmensleitung, Mitarbeitern und Arbeitnehmervertretungen spielt eine zentrale Rolle bei der Siemens AG.

### Mitarbeiter – wichtige Kennzahlen

|                                                                  | Geschäftsjahresende<br>30. September |       |
|------------------------------------------------------------------|--------------------------------------|-------|
|                                                                  | 2010                                 | 2009  |
| Mitarbeiterfluktuationsrate <sup>1</sup>                         | 4,0%                                 | 4,4%  |
| Frauenanteil (in Prozent der Mitarbeiter in Führungspositionen)  | 10,0%                                | 10,0% |
| Ausgaben für Weiterbildung (in Mio. EUR) <sup>2</sup>            | 90                                   | 89    |
| Ausgaben für Weiterbildung pro Mitarbeiter (in EUR) <sup>2</sup> | 882                                  | 930   |

- 1 Die Mitarbeiterfluktuationsrate ist definiert als Quotient aus der Zahl der freiwilligen und unfreiwilligen Abgänge von Siemens während des Geschäftsjahrs und der Gesamtzahl der Mitarbeiter.
- 2 Ohne Berücksichtigung von Reisekosten.

Weitere Informationen finden sich im Abschnitt »Geschäft und Rahmenbedingungen – Nachhaltigkeit – Mitarbeiter«.

## FORSCHUNG UND ENTWICKLUNG

Die Siemens AG hat im Geschäftsjahr 2010 die Aufwendungen für Forschung und Entwicklung (FuE) mit 2.311 Mio. EUR gegenüber 2.362 Mio. EUR im Vorjahr nahezu auf dem gleichen Niveau gehalten. Die FuE-Intensität (FuE-Aufwendungen in % vom Umsatz) erreicht aufgrund des starken Umsatzwachstums damit 8%, gegenüber 9% im Vorjahr. Im Berichtsjahr waren durchschnittlich 10.500 (im Vj. 10.100) Mitarbeiter in der Forschung und Entwicklung beschäftigt.

Den überwiegenden Teil der FuE-Aufwendungen konzentrieren wir auf die Sektoren Industry, Energy und Healthcare. Der Sektor Industry investierte 1.129 (im Vj. 1.167) Mio. EUR mit einer FuE-Intensität von 8% (im Vj. 10%), der Sektor Energy 464 (im Vj. 484) Mio. EUR mit einer FuE-Intensität von 5% (im Vj. 5%), der Sektor Healthcare 549 (im Vj. 542) Mio. EUR mit einer FuE-Intensität von 14% (im Vj. 14%). Weitere Aufwendungen erbringen wir in unserer zentralen Forschungsabteilung (Corporate Technology) und bei Siemens IT Solutions and Services. Die Siemens AG beteiligte sich auch im abgelaufenen Geschäftsjahr wieder an zahlreichen Kooperationsprojekten mit Hochschulen ebenso wie mit Forschungsinstituten und industriellen Partnern – auch im Rahmen von öffentlich geförderten Programmen, etwa der Europäischen Union oder des deutschen Bundesforschungsministeriums. Weitere Informationen hierzu sind im Abschnitt »Wertschöpfungskette« unter »Forschung und Entwicklung« enthalten. Die dort beschriebenen FuE-Tätigkeiten in Zusammenhang mit Beleuchtungslösungen bei Industry und Labordiagnostik bei Healthcare werden im Wesentlichen von Einheiten außerhalb der Siemens AG erbracht.



## EREIGNISSE NACH DEM GESCHÄFTSJAHRESENDE

Am 1. Oktober 2010 wurde das Geschäft von Siemens IT Solutions and Services in eine rechtlich selbstständige Einheit ausgegliedert, die vollständig im Besitz der Siemens AG ist.

## RISIKEN UND RISIKOMANAGEMENT

Die Siemens AG als Mutterunternehmen des Siemens-Konzerns ist eingebunden in das konzernweite Risikomanagement. Einzelheiten hierzu sind im Abschnitt »Bericht über die voraussichtliche Entwicklung mit ihren wesentlichen Chancen und Risiken – Risikomanagement« enthalten.

Die nach § 289 Abs. 5 HGB erforderliche Beschreibung des internen Kontrollsystems für die Siemens AG wird im Abschnitt »Angaben nach § 289 Abs. 5 und § 315 Abs. 2 Nr. 5 HGB und erläuternder Bericht« beschrieben.

Als Mutterunternehmen des Siemens-Konzerns ist die Siemens AG im Wesentlichen direkt oder indirekt über ihre Tochterunternehmen den gleichen Risiken ausgesetzt wie der Konzern. Diese sind im Abschnitt »Bericht über die voraussichtliche Entwicklung mit ihren wesentlichen Chancen und Risiken – Risiken« beschrieben.

## AUSBLICK

Als Muttergesellschaft des Siemens-Konzerns erwarten wir, dass die Siemens AG von der erwarteten Entwicklung des Konzerns profitieren wird. Für den Siemens-Konzern erwarten wir im Geschäftsjahr 2011 ein moderates organisches Umsatzwachstum. Ausgehend von einer positiven Entwicklung an den globalen Energiemärkten sowie an unseren langzyklischen Industriemärkten erwarten wir für den Siemens-Konzern ein organisches Umsatzwachstum im Geschäftsjahr 2012. Die Umsatzentwicklung der Siemens AG wird jedoch durch die Ausgliederung der Siemens IT Solutions and Services zurückgehalten werden.

Mit One Siemens – unserem Zielsystem zur nachhaltigen Wertsteigerung – wollen wir unseren Investoren attraktive Dividendenausschüttungen bieten. Wir haben uns daher ein Ziel für unsere Dividendenausschüttungsquote gesetzt, die als Quotient aus dem Gesamtausschüttungsbetrag und dem Gewinn nach Steuern des Siemens-Konzerns (wie im »Konzernabschluss« dargestellt) definiert ist. Für die Zukunft streben wir an, unseren Aktionären eine jährliche Dividendenausschüttungsquote in Höhe von 30 bis 50 % des Gewinns nach Steuern des Siemens-Konzerns vorzuschlagen. Die Berechnung dieser Quote wird außergewöhnliche zahlungsunwirksame Effekte im Ergebnis berücksichtigen. Wir erwarten, künftig einen Jahresüberschuss der Siemens AG zu erwirtschaften, der, gegebenenfalls ergänzt durch die Entnahme aus Rücklagen, die Ausschüttung dieser Dividende ermöglicht. Insbesondere erwarten wir, dass das Ergebnis im Geschäftsjahr 2011 den Verkauf des von Energy gehaltenen Anteils an Areva NP enthalten wird.

Weitere Informationen zur erwarteten gesamtwirtschaftlichen Entwicklung und zur Entwicklung der von unseren Sektoren bedienten Branchen sowie zu den Annahmen, die der Konzernprognose zugrunde liegen, sind enthalten im Kapitel »Bericht über die voraussichtliche Entwicklung mit ihren wesentlichen Chancen und Risiken – Prognosebericht«.

Auftragseingang und Auftragsbestand, um Währungsumrechnungs- und Portfolioeffekte bereinigte Angaben zu Umsatz und Auftragseingang, Book-to-Bill-Verhältnis, Ergebnis Summe Sektoren, Return on Equity (ROE), Return on Capital Employed (ROCE), ROCE (angepasst), Free Cash Flow, Cash Conversion Rate (CCR), angepasstes EBITDA, angepasstes EBIT, Effekte aus der Kaufpreissallokation (PPA-Effekte) sowie Integrationskosten, Nettoverschuldung und angepasste industrielle Nettoverschuldung sind oder können sogenannte Non-GAAP-Kennzahlen sein. Für die Beurteilung der Finanz- und Ertragslage von Siemens beziehungsweise für die Beurteilung von Zahlungsströmen sollten diese zusätzlichen Finanzkennzahlen nicht ausschließlich als Alternative zu den im Konzernabschluss dargestellten und im Einklang mit IFRS ermittelten Finanzkennzahlen herangezogen werden. Andere Unternehmen, die Finanzkennzahlen mit einer ähnlichen Bezeichnung darstellen oder berichten, können diese anders berechnen. Definitionen dieser zusätzlichen Finanzkennzahlen, eine Diskussion vergleichbarer IFRS-Kennzahlen, Informationen zum Nutzen und zu den Grenzen in der Verwendung solcher ergänzenden Finanzkennzahlen sowie eine Überleitung zu vergleichbaren IFRS-Kennzahlen finden Sie auf unserer Investor-Relations-Website unter [www.siemens.com/nonGAAP](http://www.siemens.com/nonGAAP). Weitere Informationen enthalten die Form 20-F von Siemens im Abschnitt »Supplemental financial measures«. Die Form 20-F finden Sie auf unserer Investor-Relations-Website oder über das EDGAR-System auf der Website der US-Börsenaufsichtsbehörde.

Dieses Dokument enthält zukunftsgerichtete Aussagen und Informationen – also Aussagen über Vorgänge, die in der Zukunft, nicht in der Vergangenheit, liegen. Diese zukunftsgerichteten Aussagen sind erkennbar durch Formulierungen wie »erwarten«, »wollen«, »antizipieren«, »beabsichtigen«, »planen«, »glauben«, »anstreben«, »einschätzen«, »werden«, »vorhersagen« oder ähnliche Begriffe. Solche Aussagen beruhen auf den heutigen Erwartungen und bestimmten Annahmen des Siemens-Vorstands. Sie unterliegen daher einer Reihe von Risiken und Ungewissheiten. Eine Vielzahl von Faktoren, von denen zahlreiche außerhalb des Einflussbereichs von Siemens liegen, beeinflusst die Geschäftsaktivitäten, den Erfolg, die Geschäftsstrategie und die Ergebnisse von Siemens. Diese Faktoren können dazu führen, dass die tatsächlichen Ergebnisse, Erfolge und Leistungen von Siemens wesentlich von den in den zukunftsgerichteten Aussagen ausdrücklich oder implizit enthaltenen Angaben zu Ergebnissen, Erfolgen oder Leistungen abweichen. Siemens ist insbesondere stark von Änderungen der allgemeinen wirtschaftlichen und geschäftlichen Lage betroffen, da diese einen direkten Einfluss auf Prozesse, Kunden und Lieferanten haben. Das kann die Entwicklung unseres Umsatzes und die Realisierung einer besseren Kapazitätsauslastung als Resultat des Wachstums nachteilig verändern. Aufgrund ihrer Unterschiedlichkeit sind nicht alle Geschäftsbereiche bei Siemens gleichermaßen von Veränderungen des wirtschaftlichen Umfelds betroffen; erhebliche Unterschiede bestehen hinsichtlich des Zeitpunkts und des Ausmaßes der Auswirkungen solcher Veränderungen. Dieser Effekt wird durch die Tatsache verstärkt, dass Siemens als ein globales Unternehmen in Ländern mit konjunkturell sehr unterschiedlichen Wachstumsraten aktiv ist. Unsicherheiten ergeben sich unter anderem aus der Gefahr, dass es auf Kundenseite zu Verzögerungen oder Stornierungen bei bereits erteilten Aufträgen kommt oder dass die Preise durch das anhaltend ungünstige Marktumfeld weiter gedrückt werden, als der Vorstand von Siemens es derzeit erwartet, oder dass die Funktionskosten in Vorwegnahme eines Wachstums, das nicht wie erwartet eintritt, steigen. Weitere Faktoren, die Ursache für eine Abweichung des Ergebnisses von Siemens von den ursprünglichen Erwartungen sein können, sind Entwicklungen an den Finanzmärkten, einschließlich Schwankungen bei Zinssätzen und Währungskursen (insbesondere im Verhältnis zum U.S.\$), Rohstoffpreisen und Aktienkursen, Kreditrisikozuschlägen (*credit spreads*) sowie der Werte der Finanzanlagen im Allgemeinen. Etwaige Änderungen in den Zinssätzen oder anderen Annahmen, die bei der Berechnung der Pensionsverpflichtungen verwendet werden, können einen Einfluss auf den Anwartschaftsbarwert der leistungsorientierten Pensionsverpflichtungen bei Siemens sowie auf die erwartete Entwicklung des Planvermögens haben, woraus wiederum unerwartete Änderungen des Finanzierungsstatus der Pensionspläne und der Pläne für pensionsähnliche Leistungszusagen resultieren können. Eine zunehmende Volatilität im Markt, ein weiterer Verfall der Kapitalmärkte, eine Verschlechterung der Rahmenbedingungen für das Kreditgeschäft und fortgesetzte Unsicherheit in Bezug auf die Hypotheken-, Finanzmarkt- und Liquiditätskrise oder Schwankungen des zukünftigen wirtschaftlichen Erfolgs der Kerngeschäftsfelder, in denen Siemens tätig ist, können ebenso unerwartete Auswirkungen auf das Ergebnis von Siemens haben. Des Weiteren ist Siemens Risiken und Unsicherheiten in Zusammenhang mit bestimmten strategischen Neuausrichtungen, der Entwicklung seiner Beteiligungen und der strategischen Allianzen, Herausforderungen in der Integration wichtiger Akquisitionen und der Implementierung von Gemeinschaftsunternehmen und anderer wesentlicher Portfoliomaßnahmen, der Einführung konkurrierender Produkte oder Technologien durch andere Unternehmen oder den Markteintritt neuer Wettbewerber, Veränderungen der Wettbewerbsdynamik (vor allem in sich entwickelnden Märkten), dem Risiko, dass neue Produkte und Dienstleistungen seitens der Kundenzielgruppen von Siemens nicht angenommen werden, Änderungen in der Geschäftsstrategie, dem Ausgang von offenen Ermittlungen,

anhängigen Rechtsstreitigkeiten sowie den Maßnahmen, die sich aus den Ergebnissen oder auch den Tatbeständen dieser Ermittlungen ergeben, den potenziellen Auswirkungen dieser Untersuchungen und Verfahren auf das Geschäft von Siemens, einschließlich der Beziehungen zu Regierungen und anderen Kunden, den potenziellen Auswirkungen solcher Angelegenheiten auf die Abschlüsse von Siemens und verschiedenen anderen Faktoren ausgesetzt. Detailliertere Informationen über die Siemens betreffenden Risikofaktoren sind diesem Bericht und den anderen Berichten zu entnehmen, die Siemens bei der US-amerikanischen Börsenaufsicht SEC eingereicht hat und die auf der Siemens-Website unter [www.siemens.com](http://www.siemens.com) und auf der Website der SEC unter [www.sec.gov](http://www.sec.gov) abrufbar sind. Sollten sich eines oder mehrere dieser Risiken oder Ungewissheiten realisieren oder sollte sich erweisen, dass die zugrunde liegenden Annahmen nicht korrekt waren, können die tatsächlichen Ergebnisse wesentlich von denjenigen Ergebnissen abweichen, die in der zukunftsgerichteten Aussage als erwartete, antizipierte, beabsichtigte, geplante, geglaubte, angestrebte, geschätzte oder projizierte Ergebnisse genannt worden sind. Siemens übernimmt keine Verpflichtung und beabsichtigt auch nicht, diese zukunftsgerichteten Aussagen zu aktualisieren oder bei einer anderen als der erwarteten Entwicklung zu korrigieren.

# Konzernabschluss

---

- 
- 162 Konzern-Gewinn- und Verlustrechnung
  - 163 Konzern-Gesamtergebnisrechnung
  - 164 Konzernbilanz
  - 165 Konzern-Kapitalflussrechnung
  - 166 Konzern-Eigenkapitalveränderungsrechnung
  - 168 Konzernabschluss, Anhang

---

Aufgrund von Rundungen ist es möglich, dass sich einzelne Zahlen in diesem Konzernabschluss nicht genau zur angegebenen Summe aufaddieren und dass dargestellte Prozentangaben nicht genau die absoluten Werte widerspiegeln, auf die sie sich beziehen.

# Konzern-Gewinn- und Verlustrechnung

| Geschäftsjahresende 30. September 2010 und 2009

| (in Mio. EUR, Ergebnis je Aktie in EUR)                            | Anhang | Geschäftsjahresende |                       |
|--------------------------------------------------------------------|--------|---------------------|-----------------------|
|                                                                    |        | 2010                | 30. September<br>2009 |
| Umsatz                                                             |        | 75.978              | 76.651                |
| Umsatzkosten                                                       |        | - 54.331            | - 55.941              |
| Bruttoergebnis vom Umsatz                                          |        | 21.647              | 20.710                |
| Forschungs- und Entwicklungskosten                                 |        | - 3.846             | - 3.900               |
| Vertriebs- und allgemeine Verwaltungskosten                        |        | - 11.130            | - 10.896              |
| Sonstige betriebliche Erträge                                      | 6      | 856                 | 1.065                 |
| Sonstige betriebliche Aufwendungen                                 | 7      | - 1.611             | - 632                 |
| Ergebnis aus nach der Equity-Methode bilanzierten Beteiligungen    | 8      | - 40                | - 1.946               |
| Zinsertrag                                                         | 9      | 2.161               | 2.136                 |
| Zinsaufwand                                                        | 9      | - 1.890             | - 2.213               |
| Sonstiges Finanzergebnis                                           | 9      | - 336               | - 433                 |
| Gewinn /Verlust aus fortgeführten Aktivitäten vor Ertragsteuern    |        | 5.811               | 3.891                 |
| Ertragsteuern                                                      | 10     | - 1.699             | - 1.434               |
| Gewinn /Verlust aus fortgeführten Aktivitäten                      |        | 4.112               | 2.457                 |
| Gewinn /Verlust aus nicht fortgeführten Aktivitäten (nach Steuern) | 4      | - 44                | 40                    |
| Gewinn /Verlust (nach Steuern)                                     |        | 4.068               | 2.497                 |
| Davon entfallen auf:                                               |        |                     |                       |
| Nicht beherrschende Anteile                                        |        | 169                 | 205                   |
| Aktionäre der Siemens AG                                           |        | 3.899               | 2.292                 |
| Ergebnis je Aktie                                                  | 36     |                     |                       |
| Ergebnis aus fortgeführten Aktivitäten                             |        | 4,54                | 2,60                  |
| Ergebnis aus nicht fortgeführten Aktivitäten                       |        | - 0,05              | 0,05                  |
| Gewinn /Verlust (nach Steuern)                                     |        | 4,49                | 2,65                  |
| Ergebnis je Aktie (voll verwässert)                                | 36     |                     |                       |
| Ergebnis aus fortgeführten Aktivitäten                             |        | 4,49                | 2,58                  |
| Ergebnis aus nicht fortgeführten Aktivitäten                       |        | - 0,05              | 0,05                  |
| Gewinn /Verlust (nach Steuern)                                     |        | 4,44                | 2,63                  |

| Der nachfolgende Anhang ist integraler Bestandteil dieses Konzernabschlusses.

# Konzern-Gesamtergebnisrechnung

| Geschäftsjahresende 30. September 2010 und 2009

| (in Mio. EUR)                                                                              | Anhang | Geschäftsjahresende |                       |
|--------------------------------------------------------------------------------------------|--------|---------------------|-----------------------|
|                                                                                            |        | 2010                | 30. September<br>2009 |
| Gewinn (nach Steuern)                                                                      |        | 4.068               | 2.497                 |
| Unterschied aus Währungsumrechnung                                                         |        | 1.220               | - 506                 |
| Zur Veräußerung verfügbare finanzielle Vermögenswerte                                      | 11     | 19                  | 72                    |
| Derivative Finanzinstrumente                                                               | 31/32  | - 149               | 329                   |
| Versicherungsmathematische Gewinne/Verluste<br>aus Pensionen und ähnlichen Verpflichtungen | 24     | - 2.054             | - 1.249               |
| Sonstiges Ergebnis (nach Steuern) <sup>1</sup>                                             |        | - 964               | - 1.354               |
| <b>Gesamtergebnis</b>                                                                      |        | <b>3.104</b>        | <b>1.143</b>          |
| Davon entfallen auf:                                                                       |        |                     |                       |
| Nicht beherrschende Anteile                                                                |        | 212                 | 203                   |
| Aktionäre der Siemens AG                                                                   |        | 2.892               | 940                   |

1 Enthält Erträge und Aufwendungen aus nach der Equity-Methode bilanzierten Beteiligungen für das Geschäftsjahr zum 30. September 2010 in Höhe von 24 (im Vj. 71) EUR.  
Der nachfolgende Anhang ist integraler Bestandteil dieses Konzernabschlusses.



# Konzernbilanz

zum 30. September 2010 und 2009

| (in Mio. EUR)                                                                            | Anhang | 30.09.2010 | 30.09.2009 |
|------------------------------------------------------------------------------------------|--------|------------|------------|
| <b>Aktiva</b>                                                                            |        |            |            |
| Kurzfristiges Vermögen                                                                   |        |            |            |
| Zahlungsmittel und Zahlungsmitteläquivalente                                             |        | 14.108     | 10.159     |
| Zur Veräußerung verfügbare finanzielle Vermögenswerte                                    | 11     | 246        | 170        |
| Forderungen aus Lieferungen und Leistungen und sonstige Forderungen                      | 12     | 14.971     | 14.449     |
| Sonstige kurzfristige finanzielle Vermögenswerte <sup>1</sup>                            | 13     | 2.610      | 2.407      |
| Vorräte                                                                                  | 14     | 14.950     | 14.129     |
| Ertragsteuerforderungen                                                                  |        | 790        | 612        |
| Sonstige kurzfristige Vermögenswerte                                                     | 15     | 1.258      | 1.191      |
| Zur Veräußerung bestimmte Vermögenswerte                                                 | 4      | 715        | 517        |
| Summe kurzfristige Vermögenswerte                                                        |        | 49.648     | 43.634     |
| Geschäfts- und Firmenwerte                                                               | 16     | 15.763     | 15.821     |
| Sonstige Immaterielle Vermögenswerte                                                     | 17     | 4.969      | 5.026      |
| Sachanlagen                                                                              | 18     | 11.748     | 11.323     |
| Nach der Equity-Methode bilanzierte Beteiligungen                                        | 19     | 4.724      | 4.679      |
| Sonstige finanzielle Vermögenswerte <sup>1</sup>                                         | 20     | 11.296     | 10.525     |
| Latente Ertragsteuern                                                                    | 10     | 3.940      | 3.291      |
| Sonstige Vermögenswerte                                                                  |        | 739        | 627        |
| Summe Aktiva                                                                             |        | 102.827    | 94.926     |
| <b>Passiva</b>                                                                           |        |            |            |
| Kurzfristige Verbindlichkeiten                                                           |        |            |            |
| Kurzfristige Finanzschulden und kurzfristig fällige Anteile langfristiger Finanzschulden | 23     | 2.416      | 698        |
| Verbindlichkeiten aus Lieferungen und Leistungen                                         |        | 7.880      | 7.593      |
| Sonstige kurzfristige finanzielle Verbindlichkeiten <sup>1</sup>                         | 21     | 1.401      | 1.600      |
| Kurzfristige Rückstellungen                                                              | 25     | 5.138      | 4.191      |
| Ertragsteuerverbindlichkeiten                                                            |        | 1.816      | 1.936      |
| Sonstige kurzfristige Verbindlichkeiten                                                  | 22     | 21.794     | 20.311     |
| Zur Veräußerung bestimmte Verbindlichkeiten                                              | 4      | 146        | 157        |
| Summe kurzfristige Verbindlichkeiten und Rückstellungen                                  |        | 40.591     | 36.486     |
| Langfristige Finanzschulden                                                              | 23     | 17.497     | 18.940     |
| Pensionen und ähnliche Verpflichtungen                                                   | 24     | 8.464      | 5.938      |
| Latente Ertragsteuern                                                                    | 10     | 577        | 776        |
| Rückstellungen                                                                           | 25     | 3.332      | 2.771      |
| Sonstige finanzielle Verbindlichkeiten <sup>1</sup>                                      |        | 990        | 706        |
| Sonstige Verbindlichkeiten                                                               | 26     | 2.280      | 2.022      |
| Summe Verbindlichkeiten und Rückstellungen                                               |        | 73.731     | 67.639     |
| Eigenkapital                                                                             | 27     |            |            |
| Gezeichnetes Kapital (Aktien ohne Nennbetrag) <sup>2</sup>                               |        | 2.743      | 2.743      |
| Kapitalrücklage                                                                          |        | 5.986      | 5.946      |
| Gewinnrücklage                                                                           |        | 22.998     | 22.646     |
| Sonstige Bestandteile des Eigenkapitals                                                  |        | - 8        | - 1.057    |
| Eigene Anteile zu Anschaffungskosten <sup>3</sup>                                        |        | - 3.373    | - 3.632    |
| Summe Eigenkapital der Aktionäre der Siemens AG                                          |        | 28.346     | 26.646     |
| Nicht beherrschende Anteile                                                              |        | 750        | 641        |
| Summe Eigenkapital                                                                       |        | 29.096     | 27.287     |
| Summe Passiva                                                                            |        | 102.827    | 94.926     |

<sup>1</sup> Aufgrund der im Geschäftsjahr 2010 rückwirkenden Anwendung einer überarbeiteten Rechnungslegungsverlautbarung wurden bestimmte Derivate, die nicht die Voraussetzungen für die Bilanzierung einer Sicherungsbeziehung (Hedge Accounting) erfüllen, von kurzfristig zu langfristig umgegliedert (siehe Ziffer 2 im »Anhang zum Konzernabschluss«).

<sup>2</sup> Genehmigt: 1.111.513,421 (im Vj. 1.111.513,421) Aktien. Ausgegeben: 914.203,421 (im Vj. 914.203,421) Aktien.

<sup>3</sup> 44.366,416 (im Vj. 47.777,661) Aktien.

Der nachfolgende Anhang ist integraler Bestandteil dieses Konzernabschlusses.

# Konzern-Kapitalflussrechnung

Geschäftsjahresende 30. September 2010 und 2009

| (in Mio. EUR)                                                                                                                                                              | Anhang | Geschäftsjahresende 30. September |                |
|----------------------------------------------------------------------------------------------------------------------------------------------------------------------------|--------|-----------------------------------|----------------|
|                                                                                                                                                                            |        | 2010                              | 2009           |
| <b>Mittelzuflüsse/-abflüsse aus laufender Geschäftstätigkeit</b>                                                                                                           |        |                                   |                |
| Gewinn (nach Steuern)                                                                                                                                                      |        | 4.068                             | 2.497          |
| Überleitung zwischen Gewinn und Mittelzufluss/-abfluss aus laufender Geschäftstätigkeit                                                                                    |        |                                   |                |
| Abschreibungen <sup>1</sup>                                                                                                                                                |        | 4.118                             | 2.871          |
| Ertragsteuern                                                                                                                                                              |        | 1.688                             | 1.492          |
| Zinsergebnis <sup>2</sup>                                                                                                                                                  |        | - 271                             | 69             |
| Ergebnis aus dem Verkauf von Geschäftseinheiten, Immateriellen Vermögenswerten und Sachanlagen                                                                             |        | - 306                             | - 434          |
| Ergebnis aus dem Verkauf von Finanzanlagen <sup>3</sup>                                                                                                                    |        | - 72                              | - 351          |
| Ergebnis aus dem Verkauf von kurzfristigen zur Veräußerung verfügbaren finanziellen Vermögenswerten und Wertminderungen                                                    |        | 13                                | 11             |
| Sonstiges Ergebnis aus Finanzanlagen <sup>1,3</sup>                                                                                                                        |        | 59                                | 1.974          |
| Übrige zahlungsunwirksame Erträge und Aufwendungen                                                                                                                         |        | - 59                              | 354            |
| Veränderung bei kurzfristigen Vermögenswerten und Verbindlichkeiten                                                                                                        |        |                                   |                |
| Veränderung der Vorräte                                                                                                                                                    |        | - 75                              | - 62           |
| Veränderung der Forderungen aus Lieferungen und Leistungen und sonstiger Forderungen                                                                                       |        | - 51                              | 1.104          |
| Veränderung der Sonstigen kurzfristigen Vermögenswerte <sup>4</sup>                                                                                                        |        | - 206                             | 103            |
| Veränderung der Verbindlichkeiten aus Lieferungen und Leistungen                                                                                                           |        | 112                               | - 1.070        |
| Veränderung der kurzfristigen Rückstellungen <sup>5</sup>                                                                                                                  |        | 629                               | - 549          |
| Veränderung der Sonstigen kurzfristigen Verbindlichkeiten <sup>4,5</sup>                                                                                                   |        | 1.307                             | - 762          |
| Veränderung der Sonstigen Vermögenswerte und Verbindlichkeiten <sup>2,4,5</sup>                                                                                            |        | - 257                             | - 357          |
| Zugänge zu vermieteten Vermögenswerten unter Operating-Leasingverträgen <sup>6</sup>                                                                                       |        | - 623                             | - 463          |
| Gezahlte Ertragsteuern                                                                                                                                                     |        | - 1.951                           | - 1.536        |
| Erhaltene Dividenden                                                                                                                                                       |        | 538                               | 441            |
| Erhaltene Zinsen                                                                                                                                                           |        | 688                               | 769            |
| Mittelzufluss/-abfluss aus laufender Geschäftstätigkeit – fortgeführte und nicht fortgeführte Aktivitäten                                                                  |        | 9.349                             | 6.101          |
| <b>Mittelzufluss/-abfluss aus laufender Geschäftstätigkeit – fortgeführte Aktivitäten</b>                                                                                  |        | <b>9.447</b>                      | <b>6.246</b>   |
| <b>Mittelzuflüsse/-abflüsse aus Investitionstätigkeit</b>                                                                                                                  |        |                                   |                |
| Investitionen in Immaterielle Vermögenswerte und Sachanlagen <sup>6</sup>                                                                                                  |        | - 2.336                           | - 2.460        |
| Erwerb von Unternehmen, abzüglich übernommener Zahlungsmittel                                                                                                              |        | - 485                             | - 208          |
| Investitionen in Finanzanlagen <sup>3</sup>                                                                                                                                |        | - 422                             | - 972          |
| Erwerb von kurzfristigen zur Veräußerung verfügbaren finanziellen Vermögenswerten                                                                                          |        | - 138                             | - 52           |
| Veränderung der Forderungen aus Finanzdienstleistungen                                                                                                                     |        | - 192                             | - 495          |
| Erlöse aus dem Abgang von Finanzanlagen, Immateriellen Vermögenswerten und Sachanlagen <sup>3</sup>                                                                        |        | 589                               | 1.224          |
| Erlöse und Zahlungen aus dem Verkauf und der Übertragung von Geschäftseinheiten                                                                                            |        | 93                                | - 234          |
| Erlöse aus dem Verkauf von kurzfristigen zur Veräußerung verfügbaren finanziellen Vermögenswerten                                                                          |        | 44                                | 35             |
| Mittelzufluss/-abfluss aus Investitionstätigkeit – fortgeführte und nicht fortgeführte Aktivitäten                                                                         |        | - 2.847                           | - 3.162        |
| <b>Mittelzufluss/-abfluss aus Investitionstätigkeit – fortgeführte Aktivitäten</b>                                                                                         |        | <b>- 2.768</b>                    | <b>- 2.968</b> |
| <b>Mittelzuflüsse/-abflüsse aus Finanzierungstätigkeit</b>                                                                                                                 |        |                                   |                |
| Ausgabe eigener Anteile                                                                                                                                                    | 27     | 147                               | 134            |
| Aufnahme von langfristigen Finanzschulden                                                                                                                                  | 23     | -                                 | 3.973          |
| Rückzahlung von langfristigen Finanzschulden (einschließlich kurzfristig gewordener Anteile)                                                                               |        | - 45                              | - 1.076        |
| Veränderung kurzfristiger Finanzschulden und übrige Finanzierungstätigkeiten                                                                                               |        | - 721                             | - 356          |
| Gezahlte Zinsen                                                                                                                                                            |        | - 440                             | - 759          |
| Dividendenzahlung                                                                                                                                                          | 27     | - 1.388                           | - 1.380        |
| Dividendenzahlung an nicht beherrschende Anteilinhaber                                                                                                                     |        | - 199                             | - 161          |
| Mittelzufluss/-abfluss aus Finanzierungstätigkeit – fortgeführte und nicht fortgeführte Aktivitäten                                                                        |        | - 2.646                           | 375            |
| <b>Mittelzufluss/-abfluss aus Finanzierungstätigkeit – fortgeführte Aktivitäten</b>                                                                                        |        | <b>- 2.823</b>                    | <b>36</b>      |
| Einfluss von Wechselkursänderungen auf die Zahlungsmittel und Zahlungsmitteläquivalente                                                                                    |        | 167                               | - 39           |
| Veränderung der Zahlungsmittel und Zahlungsmitteläquivalente                                                                                                               |        | 4.023                             | 3.275          |
| Zahlungsmittel und Zahlungsmitteläquivalente zu Beginn des Berichtszeitraums                                                                                               |        | 10.204                            | 6.929          |
| Zahlungsmittel und Zahlungsmitteläquivalente am Ende des Berichtszeitraums                                                                                                 |        | 14.227                            | 10.204         |
| Abzüglich Zahlungsmittel und Zahlungsmitteläquivalente der zur Veräußerung bestimmten Vermögenswerte und der nicht fortgeführten Aktivitäten am Ende des Berichtszeitraums |        | 119                               | 45             |
| Zahlungsmittel und Zahlungsmitteläquivalente am Ende des Berichtszeitraums (Konzernbilanz)                                                                                 |        | 14.108                            | 10.159         |

- 1 Abschreibungen in Höhe von 1.145 EUR im Geschäftsjahr 2010 beziehen sich auf die Wertminderung eines Geschäfts- und Firmenwerts bei der Division Diagnostics im Sektor Healthcare. Sonstiges Ergebnis aus Finanzanlagen beinhaltet 1.634 EUR im Geschäftsjahr 2009 aufgrund einer Wertminderung auf unsere nach der Equity-Methode bilanzierte Beteiligung an NSM. Wertminderungen auf nicht kurzfristige zur Veräußerung verfügbare finanzielle Vermögenswerte, abzüglich der Zuschreibungen aus Wertaufholung, wurden rückwirkend umgegliedert, um mit dem Ausweis des laufenden Geschäftsjahrs übereinzustimmen.
- 2 Das pensionsbezogene Zinsergebnis ist rückwirkend umgegliedert worden, um mit dem Ausweis des laufenden Geschäftsjahrs übereinzustimmen.
- 3 Finanzanlagen umfassen Beteiligungen, die entweder als langfristige zur Veräußerung verfügbare finanzielle Vermögenswerte klassifiziert, nach der Equity-Methode bilanziert oder als zur Veräußerung bestimmte Vermögenswerte klassifiziert werden. Investitionen in Finanzanlagen umfassen bestimmte Darlehen an Beteiligungen, die nach der Equity-Methode bilanziert werden.
- 4 Beinhaltet die Wirkungen aufgrund einer im Geschäftsjahr 2010 rückwirkenden Anwendung einer überarbeiteten Rechnungslegungsverlautbarung, nach der bestimmte Derivate, die nicht die Voraussetzungen für die Bilanzierung einer Sicherungsbeziehung (Hedge Accounting) erfüllen, von kurzfristig zu langfristig umgegliedert wurden. Darüber hinaus wurde der Vorjahresausweis betreffend der Derivate, die die Voraussetzungen für die Bilanzierung einer Sicherungsbeziehung von Zahlungsströmen (Cashflow Hedges) erfüllen, umgegliedert, um mit dem laufenden Ausweis übereinzustimmen.
- 5 Im Geschäftsjahr 2010 wurden kurzfristige Anteile innerhalb der Rückstellungen umklassifiziert. Die Vorjahresbeträge wurden angepasst, um mit dem Ausweis des laufenden Geschäftsjahrs übereinzustimmen.
- 6 Aufgrund einer Änderung der Rechnungslegungsverlautbarungen wurden, beginnend mit dem Geschäftsjahr 2010, die Zugänge zu vermieteten Vermögenswerten unter Operating-Leasingverträgen, die in vorhergehenden Jahren unter den Investitionen in Immaterielle Vermögenswerte und Sachanlagen ausgewiesen wurden, rückwirkend von dem Mittelzufluss/-abfluss aus Investitionstätigkeit zu dem Mittelzufluss/-abfluss aus laufender Geschäftstätigkeit umgegliedert. Für weitere Informationen hierzu siehe »Anhang zum Konzernabschluss«.

Der nachfolgende Anhang ist integraler Bestandteil dieses Konzernabschlusses.

# Konzern-Eigenkapitalveränderungsrechnung

Geschäftsjahresende 30. September 2010 und 2009

| (in Mio. EUR)                                        | Gezeichnetes Kapital | Kapitalrücklage | Gewinnrücklage       |
|------------------------------------------------------|----------------------|-----------------|----------------------|
| Stand am 1. Oktober 2008                             | 2.743                | 5.997           | 22.989               |
| Gewinn (nach Steuern)                                | -                    | -               | 2.292                |
| Sonstiges Ergebnis (nach Steuern)                    | -                    | -               | - 1.248 <sup>1</sup> |
| Dividenden                                           | -                    | -               | - 1.380              |
| Ausgabe neuer Aktien und aktienorientierte Vergütung | -                    | 63              | -                    |
| Erwerb eigener Anteile                               | -                    | -               | -                    |
| Ausgabe eigener Anteile                              | -                    | - 114           | -                    |
| Sonstige Eigenkapitalveränderungen                   | -                    | -               | - 7                  |
| <b>Stand am 30. September 2009</b>                   | <b>2.743</b>         | <b>5.946</b>    | <b>22.646</b>        |
| Stand am 1. Oktober 2009                             | 2.743                | 5.946           | 22.646               |
| Gewinn (nach Steuern)                                | -                    | -               | 3.899                |
| Sonstiges Ergebnis (nach Steuern)                    | -                    | -               | - 2.053 <sup>1</sup> |
| Dividenden                                           | -                    | -               | - 1.388              |
| Ausgabe neuer Aktien und aktienorientierte Vergütung | -                    | 60              | - 19                 |
| Erwerb eigener Anteile                               | -                    | -               | -                    |
| Ausgabe eigener Anteile                              | -                    | - 20            | -                    |
| Sonstige Eigenkapitalveränderungen                   | -                    | -               | - 87                 |
| <b>Stand am 30. September 2010</b>                   | <b>2.743</b>         | <b>5.986</b>    | <b>22.998</b>        |

- Die Gewinnrücklage beinhaltet Versicherungsmathematische Gewinne / Verluste aus Pensionen und ähnlichen Verpflichtungen für das Geschäftsjahr zum 30. September 2010 in Höhe von - 2.053 (im Vj. - 1.248) EUR.
- Sonstiges Ergebnis (nach Steuern) beinhaltet für das Geschäftsjahr zum 30. September 2010 nicht beherrschende Anteile in Höhe von - 1 EUR bezogen auf Versicherungsmathematische Gewinne / Verluste aus Pensionen und ähnlichen Verpflichtungen, in Höhe von 44 EUR bezogen auf Unterschiede aus Währungsumrechnung, in Höhe von 0 EUR bezogen auf Zur Veräußerung verfügbare finanzielle Vermögenswerte sowie in Höhe von 0 EUR bezogen auf Derivative Finanzinstrumente.

Der nachfolgende Anhang ist integraler Bestandteil dieses Konzernabschlusses.

## Gesamtergebnis

| Sonstige Bestandteile des Eigenkapitals |                                                       |                               |               |                                       |                                                 |                             |                    |  |
|-----------------------------------------|-------------------------------------------------------|-------------------------------|---------------|---------------------------------------|-------------------------------------------------|-----------------------------|--------------------|--|
| Unterschied aus Währungs-umrechnung     | Zur Veräußerung verfügbare finanzielle Vermögenswerte | Derivative Finanz-instrumente | Summe         | Eigene Anteile zu Anschaffungs-kosten | Summe Eigenkapital der Aktionäre der Siemens AG | Nicht beherrschende Anteile | Summe Eigenkapital |  |
| - 789                                   | 4                                                     | - 168                         | 22.036        | - 4.002                               | 26.774                                          | 606                         | 27.380             |  |
| -                                       | -                                                     | -                             | 2.292         | -                                     | 2.292                                           | 205                         | 2.497              |  |
| - 505                                   | 72                                                    | 329                           | - 1.352       | -                                     | - 1.352                                         | - 2                         | - 1.354            |  |
| -                                       | -                                                     | -                             | - 1.380       | -                                     | - 1.380                                         | - 137                       | - 1.517            |  |
| -                                       | -                                                     | -                             | -             | -                                     | 63                                              | -                           | 63                 |  |
| -                                       | -                                                     | -                             | -             | -                                     | -                                               | -                           | -                  |  |
| -                                       | -                                                     | -                             | -             | 370                                   | 256                                             | -                           | 256                |  |
| -                                       | -                                                     | -                             | - 7           | -                                     | - 7                                             | - 31                        | - 38               |  |
| <b>- 1.294</b>                          | <b>76</b>                                             | <b>161</b>                    | <b>21.589</b> | <b>- 3.632</b>                        | <b>26.646</b>                                   | <b>641</b>                  | <b>27.287</b>      |  |
| - 1.294                                 | 76                                                    | 161                           | 21.589        | - 3.632                               | 26.646                                          | 641                         | 27.287             |  |
| -                                       | -                                                     | -                             | 3.899         | -                                     | 3.899                                           | 169                         | 4.068              |  |
| 1.176                                   | 19                                                    | - 149                         | - 1.007       | -                                     | - 1.007                                         | 43                          | - 964 <sup>2</sup> |  |
| -                                       | -                                                     | -                             | - 1.388       | -                                     | - 1.388                                         | - 183                       | - 1.571            |  |
| -                                       | -                                                     | -                             | - 19          | -                                     | 41                                              | -                           | 41                 |  |
| -                                       | -                                                     | -                             | -             | -                                     | -                                               | -                           | -                  |  |
| -                                       | -                                                     | -                             | -             | 259                                   | 239                                             | -                           | 239                |  |
| 3                                       | -                                                     | -                             | - 84          | -                                     | - 84                                            | 80                          | - 4                |  |
| <b>- 115</b>                            | <b>95</b>                                             | <b>12</b>                     | <b>22.990</b> | <b>- 3.373</b>                        | <b>28.346</b>                                   | <b>750</b>                  | <b>29.096</b>      |  |

# Segmentinformationen (fortgeführte Aktivitäten)

Geschäftsjahresende 30. September 2010 und 2009

| (in Mio. EUR)                                                          | Auftragseingang <sup>1</sup> |               | Außenumsatz   |               | Interner Umsatz |              | Gesamter Umsatz |               |
|------------------------------------------------------------------------|------------------------------|---------------|---------------|---------------|-----------------|--------------|-----------------|---------------|
|                                                                        | 2010                         | 2009          | 2010          | 2009          | 2010            | 2009         | 2010            | 2009          |
| <b>Sektoren</b>                                                        |                              |               |               |               |                 |              |                 |               |
| Industry                                                               | 34.908                       | 33.284        | 33.728        | 33.915        | 1.141           | 1.128        | 34.869          | 35.043        |
| Energy                                                                 | 30.122                       | 30.076        | 25.204        | 25.405        | 316             | 388          | 25.520          | 25.793        |
| Healthcare                                                             | 12.872                       | 11.950        | 12.280        | 11.864        | 85              | 63           | 12.364          | 11.927        |
| <b>Summe Sektoren</b>                                                  | <b>77.902</b>                | <b>75.310</b> | <b>71.212</b> | <b>71.184</b> | <b>1.541</b>    | <b>1.579</b> | <b>72.753</b>   | <b>72.763</b> |
| Equity Investments                                                     | -                            | -             | -             | -             | -               | -            | -               | -             |
| <b>Sektorübergreifende Geschäfte</b>                                   |                              |               |               |               |                 |              |                 |               |
| Siemens IT Solutions and Services                                      | 4.226                        | 4.501         | 3.150         | 3.580         | 1.005           | 1.106        | 4.155           | 4.686         |
| Siemens Financial Services (SFS)                                       | 787                          | 778           | 661           | 663           | 126             | 114          | 787             | 777           |
| <b>Überleitung Konzernabschluss</b>                                    |                              |               |               |               |                 |              |                 |               |
| Zentral gesteuerte Portfolioaktivitäten                                | 414                          | 474           | 324           | 461           | 21              | 42           | 345             | 503           |
| Siemens Real Estate (SRE)                                              | 1.941                        | 1.763         | 303           | 364           | 1.625           | 1.399        | 1.928           | 1.763         |
| Zentrale Posten und Pensionen                                          | 418                          | 380           | 329           | 399           | 140             | 74           | 469             | 473           |
| Konsolidierungen, Konzern-Treasury und sonstige Überleitungspositionen | - 4.525                      | - 4.215       | -             | -             | - 4.458         | - 4.314      | - 4.458         | - 4.314       |
| <b>Siemens</b>                                                         | <b>81.163</b>                | <b>78.991</b> | <b>75.978</b> | <b>76.651</b> | <b>-</b>        | <b>-</b>     | <b>75.978</b>   | <b>76.651</b> |

<sup>1</sup> Diese ergänzende Information zum *Auftragseingang* wird auf freiwilliger Basis berichtet. Sie ist nicht Teil des geprüften Konzernabschlusses.

<sup>2</sup> Das *Ergebnis der Sektoren* sowie von *Equity Investments*, *Siemens IT Solutions and Services* und *Zentral gesteuerte Portfolioaktivitäten* ist das Ergebnis vor Finanzierungszinsen, bestimmten Pensionsaufwendungen und Ertragsteuern. Darüber hinaus werden dem Ergebnis verschiedene Sachverhalte nicht zugerechnet, die das Management als nicht indikativ für die Erfolgsbeurteilung erachtet. Das *Ergebnis von SFS* und *SRE* ist das Ergebnis vor Ertragsteuern.

<sup>3</sup> Das *Vermögen der Sektoren* sowie von *Equity Investments*, *Siemens IT Solutions and Services* und *Zentral gesteuerte Portfolioaktivitäten* ist definiert als das Gesamtvermögen, abzüglich Steuerforderungen und zinsloser Rückstellungen/Verbindlichkeiten (ohne Steuerverbindlichkeiten). *Vermögen von SFS* und *SRE* ist das Gesamtvermögen.

<sup>4</sup> Der *Free Cash Flow* ist definiert als Mittelzufluss/-abfluss aus laufender Geschäftstätigkeit, abzüglich Investitionen in Immaterielle Vermögenswerte und Sachanlagen. Der *Free Cash Flow der Sektoren* sowie von *Equity Investments*, *Siemens IT Solutions and Services* und *Zentral gesteuerte Portfolioaktivitäten* schließt vor allem die in Zusammenhang mit Ertragsteuern, Finanzierungszinsen und bestimmten Pensionsaufwendungen stehenden Zahlungen und Erstattungen aus. Der *Free Cash Flow von SFS*, einem Finanzdienstleister, und von *SRE* beinhaltet die in Zusammenhang mit Finanzierungszinsen stehenden Zahlungen und Erstattungen; Zahlungen und Erstattungen in Zusammenhang mit Ertragsteuern sind bei *SFS* und *SRE* ausgeschlossen.

|  | Ergebnis <sup>2</sup> |              | Vermögen <sup>3</sup> |               | Free Cash Flow <sup>4</sup> |              | Investitionen in<br>Immaterielle Vermögenswerte<br>und Sachanlagen <sup>5</sup> |              | Abschreibungen <sup>6</sup> |              |
|--|-----------------------|--------------|-----------------------|---------------|-----------------------------|--------------|---------------------------------------------------------------------------------|--------------|-----------------------------|--------------|
|  | 2010                  | 2009         | 30.09.2010            | 30.09.2009    | 2010                        | 2009         | 2010                                                                            | 2009         | 2010                        | 2009         |
|  | 3.478                 | 2.701        | 10.014                | 10.551        | 4.020                       | 3.340        | 817                                                                             | 818          | 1.023                       | 1.077        |
|  | 3.562                 | 3.315        | 805                   | 1.594         | 4.522                       | 2.523        | 579                                                                             | 662          | 447                         | 385          |
|  | 748                   | 1.450        | 11.952                | 12.813        | 2.391                       | 1.743        | 328                                                                             | 353          | 709                         | 654          |
|  | <b>7.789</b>          | <b>7.466</b> | <b>22.771</b>         | <b>24.958</b> | <b>10.934</b>               | <b>7.606</b> | <b>1.724</b>                                                                    | <b>1.833</b> | <b>2.178</b>                | <b>2.116</b> |
|  | - 191                 | - 1.851      | 3.319                 | 3.833         | 402                         | 236          | -                                                                               | -            | -                           | -            |
|  | - 537                 | 90           | - 150                 | 241           | - 116                       | 1            | 138                                                                             | 114          | 142                         | 180          |
|  | 447                   | 304          | 12.506                | 11.704        | 333                         | 330          | 95                                                                              | 154          | 334                         | 320          |
|  | - 139                 | - 371        | - 574                 | - 543         | - 130                       | - 233        | 8                                                                               | 10           | 7                           | 28           |
|  | 250                   | 341          | 5.067                 | 4.489         | 9                           | 3            | 328                                                                             | 298          | 296                         | 181          |
|  | - 1.479 <sup>7</sup>  | - 1.715      | - 10.447              | - 7.445       | - 1.951                     | - 2.766      | 57                                                                              | 64           | 74                          | 84           |
|  | - 328                 | - 373        | 70.335                | 57.689        | - 2.371                     | - 1.391      | - 13                                                                            | - 13         | - 59                        | - 70         |
|  | <b>5.811</b>          | <b>3.891</b> | <b>102.827</b>        | <b>94.926</b> | <b>7.111</b>                | <b>3.786</b> | <b>2.336</b>                                                                    | <b>2.460</b> | <b>2.973</b>                | <b>2.839</b> |

- 5 Um dem Ausweis in der Konzern-Kapitalflussrechnung zu entsprechen, werden, beginnend mit dem Geschäftsjahr 2010, die Investitionen in Immaterielle Vermögenswerte und Sachanlagen ohne die Zugänge zu im Rahmen von Operating-Leasingverträgen vermieteten Vermögenswerten ausgewiesen. Die Zugänge zu vermieteten Vermögenswerten unter Operating-Leasingverträgen belaufen sich für das Geschäftsjahr zum 30. September 2010 auf 623 EUR (im Vj. 463 EUR). Für weitere Informationen hierzu siehe »Anhang zum Konzernabschluss«.
- 6 Die *Abschreibungen* beinhalten die Abschreibungen und Wertminderungen auf Sachanlagen nach Abzug von Wertaufholungen sowie die Abschreibungen und Wertminderungen auf Immaterielle Vermögenswerte nach Abzug von Wertaufholungen. Die Wertminderungen auf Geschäfts- und Firmenwerte sind nicht enthalten.
- 7 Das *Ergebnis* von Zentrale Posten und Pensionen beinhaltet im Geschäftsjahr 2010 höhere personalbezogene Aufwendungen. Diese beinhalten Aufwendungen in Höhe von 310 EUR aufgrund einer Sondervergütung für alle Mitarbeiter, die nicht dem oberen Management angehören. Nachdem die Aufteilung dieser Sondervergütung im ersten Quartal des Geschäftsjahrs 2011 ermittelt worden ist, werden die Aufwendungen im Geschäftsjahr 2011 überwiegend auf die Sektoren verteilt.

Aufgrund von Rundungen ist es möglich, dass sich einzelne Zahlen nicht genau zur angegebenen Summe aufaddieren.



## 1 – Allgemeine Grundlagen

Gegenstand des Konzernabschlusses sind die Siemens AG mit Sitz in Berlin und München in Deutschland und deren Tochterunternehmen (das Unternehmen, die Gesellschaft oder Siemens). Siemens hat den Konzernabschluss nach den International Financial Reporting Standards (IFRS) erstellt, wie sie in der Europäischen Union (EU) anzuwenden sind, und den ergänzend nach § 315a (1) Handelsgesetzbuch (HGB) anzuwendenden handelsrechtlichen Vorschriften. Der Konzernabschluss entspricht auch den IFRS, wie sie vom International Accounting Standards Board (IASB) veröffentlicht wurden. Bestimmte Verlautbarungen wurden vorzeitig angewendet, wie in »Ziffer 2« dargestellt.

Der Konzernabschluss und der Konzernlagebericht zum 30. September 2010 und 2009 wurden gemäß § 315a (1) Handelsgesetzbuch (HGB) aufgestellt. Sie werden beim elektronischen Bundesanzeiger eingereicht und veröffentlicht.

Siemens erstellt und veröffentlicht den Konzernabschluss in Euro (EUR). Das international aufgestellte Unternehmen ist in Deutschland ansässig und verfügt über ein ausgewogenes Portfolio an Geschäftsaktivitäten, überwiegend auf dem Gebiet der Elektroindustrie (siehe auch »Ziffer 37«).

Der Konzernabschluss wurde am 25. November 2010 durch den Vorstand aufgestellt. Der Konzernabschluss wird grundsätzlich auf Basis historischer Anschaffungs- und Herstellungskosten aufgestellt, sofern nicht in »Ziffer 2« etwas anderes berichtet wird.

## 2 – Zusammenfassung der wesentlichen Rechnungslegungsgrundsätze

Die nachstehend dargestellten Rechnungslegungsgrundsätze sind einheitlich für alle in diesem Konzernabschluss vorgelegten Rechnungslegungsperioden angewendet worden.

**Konsolidierungskreis** – In den Konzernabschluss werden zusätzlich zur Siemens AG die Tochtergesellschaften einbezogen, über die die Siemens AG mittel- oder unmittelbar beherrschenden Einfluss ausüben kann. Beherrschender Einfluss ergibt sich grundsätzlich aus dem Halten der Stimmrechtsmehrheit. Zusätzlich werden Zweckgesellschaften (sogenannte *Special Purpose Entities*, SPE) konsolidiert, sofern Siemens – unter Berücksichtigung des wirtschaftlichen Ge-

halts der Beziehung zu Siemens – beherrschenden Einfluss auf die SPE ausübt. Siemens berücksichtigt die in SIC-12.10 aufgeführten Kriterien als weitere Indikatoren für eine Geschäftsbeziehung, in der Siemens eine Zweckgesellschaft kontrolliert, um zu bestimmen, ob Siemens eine Zweckgesellschaft aufgrund des wirtschaftlichen Gehalts zu konsolidieren hat. Siemens betrachtet diese SIC-12.10-Kriterien als Indikatoren und bevorzugt jedoch stets eine sachverhaltsbezogene Einzelfallanalyse, basierend auf individuellen Fakten und Kriterien. Assoziierte Unternehmen werden in den Konzernabschluss nach der Equity-Methode einbezogen. Unternehmen, bei denen Siemens die Führung gemeinschaftlich mit anderen Partnern ausübt, werden ebenfalls nach der Equity-Methode einbezogen.

**Unternehmenszusammenschlüsse** – Unternehmenszusammenschlüsse werden nach der Akquisitionsmethode bilanziert. Die Anschaffungskosten einer Unternehmensakquisition werden nach den beizulegenden Zeitwerten der hingegenommenen Vermögenswerte und der eingegangenen oder übernommenen Verbindlichkeiten zum Erwerbszeitpunkt bemessen. Anschaffungsnebenkosten werden zum Zeitpunkt ihres Entstehens aufwandswirksam erfasst. Die bei einem Unternehmenszusammenschluss erworbenen, identifizierbaren Vermögenswerte sowie die übernommenen Verbindlichkeiten (einschließlich bedingter Verbindlichkeiten) werden mit ihren beizulegenden Zeitwerten zum Erwerbszeitpunkt bewertet, unabhängig vom Umfang etwaiger nicht beherrschender Anteile. Dabei werden einheitliche Rechnungslegungsmethoden angewendet. Anpassungen bedingter Kaufpreisbestandteile, die zum Zeitpunkt des Erwerbs als Verbindlichkeit ausgewiesen werden, sind erfolgswirksam zu erfassen. Die Bewertung von nicht beherrschenden Anteilen erfolgt entweder zum beizulegenden Zeitwert (»Full-Goodwill-Methode«) oder zum anteilig beizulegenden Zeitwert der erworbenen Vermögenswerte und übernommenen Verbindlichkeiten. Nach erstmaligem Ansatz werden Gewinne und Verluste unbegrenzt beteiligungsproportional zugerechnet, wodurch auch ein Negativsaldo bei nicht beherrschenden Anteilen entstehen kann. Bei sukzessiven Unternehmenserwerben ist eine Neubewertung zum beizulegenden Zeitwert von zum Zeitpunkt des Beherrschungsübergangs gehaltenen Anteilen vorzunehmen. Transaktionen, die nicht zu einem Beherrschungsverlust führen, werden für nicht beherrschende Anteile erfolgsneutral als Eigenkapitaltransaktionen erfasst. Zum Zeitpunkt des Beherrschungsverlusts werden jegliche verbleibende Anteile erfolgswirksam zum beizulegenden Zeitwert neu bewertet.

**Assoziierte Unternehmen** – Unternehmen, bei denen Siemens die Möglichkeit hat, maßgeblichen Einfluss auf die Geschäfts- und Finanzpolitik auszuüben (im Wesentlichen durch mittel- oder unmittelbare Stimmrechtsanteile von 20% bis 50%), werden im Konzernabschluss nach der Equity-Methode bilanziert und zunächst mit den Anschaffungskosten angesetzt. Falls notwendig, werden Anpassungen an die Rechnungslegungsmethoden von Siemens vorgenommen. Die Differenz zwischen den Anschaffungskosten der Anteile an assoziierten Unternehmen und dem Anteil von Siemens am Reinvermögen dieser Gesellschaften wird zunächst Anpassungen aus der Bewertung des erworbenen Reinvermögens zum beizulegenden Zeitwert zugeordnet. Ein übersteigender Betrag entspricht einem Geschäfts- und Firmenwert. Der Geschäfts- und Firmenwert, der aus der Anschaffung eines assoziierten Unternehmens resultiert, ist im Buchwert des assoziierten Unternehmens enthalten. Er wird nicht planmäßig abgeschrieben, sondern als Teil des gesamten Buchwerts des assoziierten Unternehmens auf Werthaltigkeit geprüft. Nach dem Erwerbszeitpunkt wird der Anteil von Siemens am Ergebnis des assoziierten Unternehmens in der Konzern-Gewinn- und Verlustrechnung erfasst, der Anteil an erfolgsneutralen Veränderungen des Eigenkapitals wird unmittelbar im Konzern-Eigenkapital erfasst. Die kumulierten Veränderungen nach dem Erwerbszeitpunkt erhöhen beziehungsweise vermindern den Beteiligungsbuchwert des assoziierten Unternehmens entsprechend. Entsprechen oder übersteigen die Siemens zurechenbaren Verluste eines assoziierten Unternehmens den Wert des Anteils an diesem assoziierten Unternehmen, erfasst Siemens keine weiteren Verlustanteile, es sei denn, Siemens ist Verpflichtungen eingegangen oder hat Zahlungen für das assoziierte Unternehmen geleistet. Der Anteil an einem assoziierten Unternehmen ist der Buchwert der Beteiligung, zuzüglich sämtlicher langfristiger Anteile, die dem wirtschaftlichen Gehalt nach der Nettoinvestition des Eigentümers in das assoziierte Unternehmen zuzuordnen sind. Ergebnisse aus Geschäftsvorfällen zwischen Siemens und seinen assoziierten Unternehmen werden gemäß dem Anteil von Siemens an dem assoziierten Unternehmen eliminiert. Siemens überprüft an jedem Bilanzstichtag, ob es objektive Hinweise auf eine Wertminderung des Anteils an dem assoziierten Unternehmen gibt. Sind solche Hinweise vorhanden, ermittelt Siemens den Wertminderungsbedarf als Differenz zwischen dem erzielbaren Betrag und dem Buchwert des assoziierten Unternehmens. Zum Zeitpunkt des Verlusts von maßgeblichem Einfluss an assoziierten Unternehmen werden jegliche verbleibende Anteile zum beizulegenden Zeitwert neu bewertet. Die Differenz zwischen dem Buchwert des assoziierten Unternehmens und dem beizulegenden Zeitwert

des zurückbehaltenen Anteils sowie des Veräußerungserlöses wird in der Gewinn- und Verlustrechnung erfasst.

**Währungsumrechnung** – Die Vermögenswerte, einschließlich Geschäfts- und Firmenwerte, und die Verbindlichkeiten ausländischer Tochterunternehmen, deren funktionale Währung nicht der Euro ist, rechnet Siemens zum Stichtagskurs am Ende der Bilanzierungsperiode um. Die Aufwendungen, Erträge und das Ergebnis werden hingegen zu unterjährigen Durchschnittskursen umgerechnet. Die sich aus der Umrechnung ergebenden Unterschiedsbeträge werden im Eigenkapital ausgewiesen und in den Gewinn nach Steuern umgegliedert, wenn der Gewinn oder Verlust aus dem Verkauf einer ausländischen Tochtergesellschaft erfasst wird.

Die für die Währungsumrechnung zugrunde gelegten Wechselkurse wesentlicher, nicht in der Europäischen Währungsunion vertretener Währungen entwickelten sich wie folgt:

| Währungen             | ISO Code | Devisenmittelkurs am Bilanzstichtag<br>(1 EUR in Fremdwährungseinheiten) |                    | Jahresdurchschnittskurs<br>(1 EUR in Fremdwährungseinheiten) |        |
|-----------------------|----------|--------------------------------------------------------------------------|--------------------|--------------------------------------------------------------|--------|
|                       |          | 30. September 2010                                                       | 30. September 2009 | 2010                                                         | 2009   |
| US-Dollar             | USD      | 1,365                                                                    | 1,464              | 1,358                                                        | 1,361  |
| Britisches Pfund      | GBP      | 0,860                                                                    | 0,909              | 0,869                                                        | 0,875  |
| Chinesischer Renminbi | CNY      | 9,133                                                                    | 9,966              | 9,226                                                        | 9,340  |
| Indische Rupie        | INR      | 61,247                                                                   | 70,001             | 62,754                                                       | 66,335 |

**Rechnungslegung in Hochinflationländern** – Die Abschlüsse von ausländischen Tochterunternehmen, deren funktionale Währung die Währung eines Hochinflationlands ist, werden in Höhe der aus der Inflation resultierenden Kaufkraftveränderung angepasst. In diesen Fällen werden alle Bilanzpositionen sowie in der Gewinn- und Verlustrechnung ausgewiesenen Beträge mit dem Stichtagskurs umgerechnet. Nicht monetäre Bilanzpositionen, die zu Anschaffungskosten beziehungsweise zu fortgeführten Anschaffungskosten bewertet werden, sowie die in der Gewinn- und Verlustrechnung ausgewiesenen Beträge werden ab dem Zeitpunkt der erstmaligen Erfassung im Abschluss auf Basis eines allgemeinen Preisindexes angepasst. Die kumulierten Auswirkungen der Inflation werden bei erstmaliger Anwendung der Regelungen zu Hochinflation in den Gewinnrücklagen, in den darauffolgenden Perioden als Gewinn oder Verlust erfasst.

**Umsatzrealisierung** – Siemens realisiert die Umsätze für Produktverkäufe, wenn ein überzeugender Nachweis für eine Vereinbarung vorliegt, die Lieferung erfolgt ist oder die Dienstleistung erbracht wurde und die Gefahren auf den Kunden übergegangen sind. Außerdem muss Siemens die Höhe des Umsatzes verlässlich ermitteln und von der Einbringbarkeit der Forderung ausgehen können. Ist eine Abnahme durch den Kunden vorgesehen, wird der entsprechende Umsatz nicht vor dieser Abnahme gebucht. Bei Auftragsfertigung weist Siemens die Umsätze grundsätzlich nach dem effektiven Projektfortschritt (Percentage-of-Completion-Methode) aus. Als Berechnungsgrundlage dienen dabei entweder das Verhältnis der bereits angefallenen Kosten zu den geschätzten Gesamtauftragskosten, vertraglich vereinbarte Meilensteine oder der Leistungsfortschritt. Die Umsätze im Dienstleistungsgeschäft erfasst Siemens, sobald die Dienstleistungen erbracht worden sind. Bei langfristigen Serviceverträgen erfasst das Unternehmen die Umsätze linear über die Vertragslaufzeit oder auch – sofern die Leistungserbringung nicht linear erfolgt –, sobald es die Dienstleistung erbracht hat, das heißt grundsätzlich nach dem effektiven Projektfortschritt (Percentage-of-Completion-Methode). Umsätze aus Operating-Leasing für die Vermietung von Anlagevermögen weist Siemens linear über die Laufzeit des Leasingvertrags aus. Vereinbarungen, die nicht in der rechtlichen Form eines Leasingverhältnisses geschlossen werden, bilanziert Siemens gleichwohl als Leasingverhältnisse, wenn die Erfüllung der Vereinbarung von der Nutzung eines bestimmten Vermögenswerts oder bestimmter Vermögenswerte abhängt und die Vereinbarung ein Recht auf Nutzung des Vermögenswerts überträgt. Forderungen aus Finanzierungsleasingverhältnissen, bei denen Siemens als Leasinggeber die mit dem Eigentum verbundenen Chancen und Risiken aus dem Leasinggegenstand weitgehend auf den Kunden überträgt, erfasst das Unternehmen in Höhe der Nettoinvestition aus dem Leasingverhältnis. Zinserträge werden nach der Effektivzinsmethode erfasst, sodass eine konstante Verzinsung der Nettoinvestition erzielt wird. Die Veräußerungserfolgskomponente wird bei Hersteller-Leasing nach den Grundsätzen für direkte Verkaufsgeschäfte erfasst. Lizenzgebühren werden entsprechend den wirtschaftlichen Gegebenheiten der Transaktion abgegrenzt und vereinnahmt.

Die Verkäufe von Produkten und Dienstleistungen sowie Softwareverträge können mehrere Liefer- und Leistungskomponenten enthalten. In diesen Fällen stellt das Unternehmen fest, ob mehr als eine Bilanzierungseinheit vorliegt. Ein Geschäft wird separiert, sofern (1) die gelieferte(n) Komponente(n) einen selbstständigen Nutzen für den Kunden hat (ha-

ben), (2) der beizulegende Zeitwert der noch ausstehenden Komponente(n) zuverlässig ermittelt werden kann und (3) bei einem generellen Rückgaberecht der gelieferten Komponente(n) die Lieferung oder Leistungserbringung der noch ausstehenden Komponente(n) wahrscheinlich und im Wesentlichen durch das Unternehmen kontrollierbar ist. Sofern alle drei Kriterien erfüllt sind, wendet Siemens die für die jeweilige separate Bilanzierungseinheit maßgebliche Umsatzleistungsvorschrift an. Grundsätzlich teilt es die vereinbarte Gesamtvergütung auf die einzelnen separaten Bilanzierungseinheiten, entsprechend ihren relativen beizulegenden Zeitwerten, auf. Die Hierarchie des Nachweises der beizulegenden Zeitwerte ist dabei wie folgt: (a) Verkaufspreise bei einem regulären Einzelverkauf der Komponenten, (b) Preise von Dritten für vergleichbare Komponenten oder – unter bestimmten Bedingungen – (c) Kosten zuzüglich eines auf die Komponenten bezogenen angemessenen geschäftsüblichen Gewinnzuschlags. Auf diese Weise sind verlässliche beizulegende Zeitwerte im Allgemeinen nachweisbar. In bestimmten Fällen ist aber der Nachweis verlässlicher beizulegender Zeitwerte gemäß (a) und (b) nicht möglich und die Ermittlung mittels Kosten zuzüglich eines angemessenen geschäftsüblichen Gewinnzuschlags (c) führt nicht zu aussagefähigen Ergebnissen, da die Kosten keine geeignete Basis für die Bestimmung des beizulegenden Werts für eine Komponente darstellen. In diesen Fällen kommt die Residualmethode zur Anwendung, wenn verlässliche beizulegende Zeitwerte für die ausstehenden, nicht aber für eine oder mehrere der gelieferten Komponenten verfügbar sind, das heißt, der den gelieferten Komponenten zuzuordnende Wert ermittelt sich aus der Differenz zwischen der vereinbarten Gesamtvergütung und dem aggregierten beizulegenden Zeitwert der ausstehenden Komponenten. Sofern die drei Separationskriterien (1) bis (3) nicht erfüllt sind, grenzt Siemens die Umsätze ab, bis diese Kriterien erfüllt sind oder die letzte ausstehende Komponente geliefert ist. Der auf gelieferte Komponenten zuordenbare Umsatz ist auf den Betrag begrenzt, der nicht von der Lieferung noch ausstehender Komponenten beziehungsweise der Erfüllung anderer bestimmter Leistungsverpflichtungen abhängt.

Dividenden werden ertragswirksam erfasst, wenn der Rechtsanspruch auf Zahlung entstanden ist. Zinsen werden unter Anwendung der Effektivzinsmethode erfasst.

**Funktionskosten** – Betriebliche Aufwendungen nach Arten werden grundsätzlich nach Maßgabe des Funktionsbereichs der jeweiligen Profit-Center beziehungsweise der jeweiligen Kostenstellen den einzelnen Funktionen zugeordnet. Aufwen-

dungen im Zusammenhang mit funktionsübergreifenden Initiativen oder Projekten werden auf Basis eines geeigneten Zuordnungsprinzips auf die betreffenden Funktionskosten aufgeteilt.

**Zuwendungen der öffentlichen Hand** – Zuwendungen der öffentlichen Hand werden nur dann erfasst, wenn eine angemessene Sicherheit besteht, dass die damit verbundenen Bedingungen erfüllt und die Zuwendungen auch tatsächlich gewährt werden. Zuwendungen für den Kauf oder die Herstellung von Anlagevermögen (vermögenswertbezogene Zuwendungen) werden grundsätzlich als Reduzierung der Anschaffungs- oder Herstellungskosten der betreffenden Vermögenswerte erfasst und mindern die künftigen Abschreibungen. Zuwendungen, die nicht für langfristige Vermögenswerte gewährt werden (erfolgsbezogene Zuwendungen), werden in der Konzern-Gewinn- und Verlustrechnung im selben Funktionsbereich ausgewiesen wie die entsprechenden Aufwandsposten. Ihre erfolgswirksame Erfassung erfolgt dabei anteilig über die Perioden, in denen die Aufwendungen, die durch die Zuwendung kompensiert werden sollen, anfallen. Vor Verursachung der Aufwendungen gewährte Zuwendungen der öffentlichen Hand werden passivisch abgegrenzt.

**Produktbezogene Aufwendungen und drohende Verluste aus Aufträgen** – Den Aufwand für Rückstellungen für Produktgewährleistungen berücksichtigt Siemens zum Zeitpunkt der Umsatzlegung in den Umsatzkosten. Die Höhe der Rückstellung wird individuell ermittelt. Eine Ausnahme ist das Standardproduktgeschäft. In die Höhe der Rückstellung gehen sowohl der tatsächlich angefallene Garantieraufwand der Vergangenheit ein als auch technische Informationen über Produktschwächen, die in der Konstruktions- und Testphase oder bei der Installation des Produkts entdeckt wurden. Bei neuen Produkten bezieht Siemens darüber hinaus auch Expertenmeinungen und Branchendaten ein. Drohende Verluste aus Aufträgen werden in dem Berichtszeitraum berücksichtigt, in dem die aktuell geschätzten Gesamtkosten die aus dem jeweiligen Vertrag zu erwartenden Umsatzerlöse übersteigen.

**Forschungs- und Entwicklungskosten** – Die Kosten für Forschungsaktivitäten, das heißt, für Aktivitäten, die unternommen werden, um neue wissenschaftliche oder technische Erkenntnisse zu gewinnen, erfasst Siemens unmittelbar in voller Höhe als Aufwand.

Die Kosten für Entwicklungsaktivitäten, das heißt für solche Aktivitäten, die Forschungsergebnisse in einen Plan oder ei-

nen Entwurf für die Produktion von neuen oder deutlich verbesserten Produkten und Prozessen umsetzen, werden dagegen aktiviert. Voraussetzung dafür ist, dass die Entwicklungskosten verlässlich ermittelt werden können, das Produkt oder der Prozess technisch und wirtschaftlich realisierbar sowie zukünftiger wirtschaftlicher Nutzen wahrscheinlich ist. Darüber hinaus muss Siemens die Absicht haben und über ausreichende Ressourcen verfügen, die Entwicklung abzuschließen und den Vermögenswert zu nutzen oder zu verkaufen. Die aktivierten Kosten umfassen die Materialkosten, die Fertigungslöhne und sonstige direkt zurechenbare Kosten, wenn diese dazu dienen, die Nutzung des Vermögenswerts vorzubereiten. Die aktivierten Kosten sind als sonstige selbst erstellte immaterielle Vermögenswerte in den *Sonstigen Immateriellen Vermögenswerten* (siehe »Ziffer 17«) enthalten. Die Sonstigen Entwicklungskosten erfasst Siemens aufwandswirksam unmittelbar bei ihrem Entstehen. Die aktivierten Entwicklungskosten setzt das Unternehmen zu Herstellungskosten an, abzüglich der kumulierten Abschreibungen und Wertminderungen bei einer Abschreibungsdauer von in der Regel drei bis fünf Jahren.

Zuwendungen der öffentlichen Hand für Forschungs- und Entwicklungsvorhaben werden mit den Forschungs- und Entwicklungskosten verrechnet. Ihre erfolgswirksame Erfassung erfolgt anteilig über die Perioden, in denen die Forschungs- und Entwicklungskosten, die durch die Zuwendung kompensiert werden sollen, anfallen. Vor Verursachung der Forschungs- und Entwicklungskosten gewährte Zuwendungen der öffentlichen Hand werden passivisch abgegrenzt.

**Ergebnis je Aktie** – Das Ergebnis je Aktie entspricht dem Gewinn aus fortgeführten Aktivitäten und dem Gewinn aus nicht fortgeführten Aktivitäten, der jeweils den Stammaktionären der Siemens AG zugerechnet werden kann, beziehungsweise dem Gewinn (nach Steuern), dividiert durch die gewichtete durchschnittliche Anzahl der während des Geschäftsjahrs im Umlauf befindlichen Aktien. Das Ergebnis je Aktie (voll verwässert) berechnet Siemens unter der Annahme, dass alle potenziell verwässernden Wertpapiere und Vergütungspläne, die auf Wertpapieren basieren, umgewandelt beziehungsweise ausgeübt wurden.

**Geschäfts- und Firmenwerte** – Geschäfts- und Firmenwerte (Goodwill) unterliegen keiner planmäßigen Abschreibung, sondern werden einmal jährlich auf Wertminderung überprüft. Eine Überprüfung erfolgt auch, wenn Ereignisse oder Umstände (Triggering Events) eintreten, die auf eine mögliche

che Wertminderung hindeuten. Der Goodwill wird zu Anschaffungskosten, abzüglich kumulierter Abschreibungen aus Wertminderungen, angesetzt.

Die Überprüfung der Werthaltigkeit des Goodwills erfolgt auf der Ebene der Divisionen, die zahlungsmittelgenerierende Einheiten (Cash Generating Units) oder Gruppen zahlungsmittelgenerierender Einheiten darstellen und die unterste Ebene repräsentieren, auf der der Goodwill für die interne Unternehmensführung überwacht wird.

Für die Werthaltigkeitsprüfung wird der im Rahmen eines Unternehmenszusammenschlusses erworbene Goodwill der zahlungsmittelgenerierenden Einheit oder der Gruppe zahlungsmittelgenerierender Einheiten zugeordnet, die erwartungsgemäß von den Synergien des Unternehmenszusammenschlusses profitieren. Übersteigt der Buchwert der Division, der der Goodwill zugeordnet wurde, deren erzielbaren Betrag, wird der dieser Division zugeordnete Goodwill aufgrund Wertminderung entsprechend abgeschrieben. Der erzielbare Betrag ist der höhere der beiden Beträge aus beizulegendem Zeitwert, abzüglich Verkaufskosten und Nutzungswert der Division. Übersteigt einer dieser beiden Beträge den Buchwert, ist es nicht immer notwendig, beide Werte zu ermitteln. Siemens ermittelt den erzielbaren Betrag einer Division auf der Basis des beizulegenden Zeitwerts, abzüglich Verkaufskosten. Diese Werte beruhen grundsätzlich auf Bewertungen mittels diskontierter Mittelzuflüsse (Discounted-Cashflow-Bewertungen). Es werden in zukünftigen Perioden keine Wertaufholungen auf abgeschriebenem Goodwill vorgenommen, wenn der erzielbare Betrag den Buchwert der zahlungsmittelgenerierenden Einheit oder der Gruppe der zahlungsmittelgenerierenden Einheiten, der der Goodwill zugeordnet ist, übersteigt. Für weitere Informationen siehe »Ziffer 16«.

**Sonstige Immaterielle Vermögenswerte** – Sonstige Immaterielle Vermögenswerte umfassen Software und sonstige selbst erstellte Immaterielle Vermögenswerte, Patente, Lizenzen und ähnliche Rechte. Das Unternehmen schreibt Immaterielle Vermögenswerte mit einer begrenzten Nutzungsdauer linear über die voraussichtliche Nutzungsdauer auf den geschätzten Restbuchwert ab. Die voraussichtliche Nutzungsdauer für Software, Patente, Lizenzen und ähnliche Rechte beträgt in der Regel drei bis fünf Jahre. Abweichend davon können sich – bei im Rahmen von Unternehmenszusammenschlüssen übernommenen Immateriellen Vermögenswerten mit begrenzter Nutzungsdauer – andere Nutzungszeiträume ergeben. Die im Rahmen von Unternehmenszusammen-

schlüssen erworbenen Immateriellen Vermögenswerte beziehen sich insbesondere auf Kundenbeziehungen und Technologie. Die entsprechenden gewichteten durchschnittlichen Nutzungsdauern lagen bei spezifischen Transaktionen zwischen neun und 22 Jahren für Kundenbeziehungen und zwischen sieben und zwölf Jahren für Technologie. Immaterielle Vermögenswerte mit unbegrenzter Nutzungsdauer sowie noch nicht nutzungsbereite Immaterielle Vermögenswerte schreibt Siemens nicht planmäßig ab, sondern überprüft sie mindestens einmal jährlich auf Wertminderung.

**Sachanlagen** – Siemens bewertet Sachanlagen zu den Anschaffungs- oder Herstellungskosten abzüglich der kumulierten planmäßigen Abschreibungen und Wertminderungen. Sind die Anschaffungs- oder Herstellungskosten von bestimmten Komponenten einer Sachanlage wesentlich – gemessen an den gesamten Anschaffungs- und Herstellungskosten der Sachanlage –, dann setzt Siemens diese Komponenten einzeln an und schreibt sie ab. Das Unternehmen wendet die lineare Abschreibung an. Restbuchwerte und Nutzungsdauern werden jährlich überprüft und, falls die Erwartungen von früheren Einschätzungen abweichen, entsprechend angepasst. In den Kosten für die Erstellung qualifizierter langfristiger Vermögenswerte (Qualifying Long-term Assets), das heißt Vermögenswerte, für die ein beträchtlicher Zeitraum erforderlich ist, um sie in ihren beabsichtigten gebrauchsfähigen Zustand zu versetzen, sind aktivierte Zinsaufwendungen enthalten. Diese schreibt Siemens über die geschätzte Nutzungsdauer der jeweiligen Vermögenswerte ab. Im Einzelnen liegen den Wertansätzen folgende unterstellte Nutzungsdauern zugrunde:

|                                    |                            |
|------------------------------------|----------------------------|
| Fabrik- und Geschäftsbauten        | 20 bis 50 Jahre            |
| Übrige Bauten                      | 5 bis 10 Jahre             |
| Technische Anlagen und Maschinen   | 5 bis 10 Jahre             |
| Betriebs- und Geschäftsausstattung | in der Regel 5 Jahre       |
| Vermietete Erzeugnisse             | in der Regel 3 bis 5 Jahre |

**Wertminderungen auf Sachanlagen und Sonstige Immaterielle Vermögenswerte** – Siemens überprüft Sachanlagen und Sonstige Immaterielle Vermögenswerte auf Wertminderung, wenn Ereignisse oder veränderte Umstände darauf hindeuten, dass der Buchwert eines Vermögenswerts möglicherweise nicht wiedererlangt werden kann. Des Weiteren wird



für Immaterielle Vermögenswerte mit unbestimmter Nutzungsdauer sowie für noch nicht nutzungsbereite Immaterielle Vermögenswerte ein jährlicher Wertminderungstest durchgeführt. Die Werthaltigkeit wird durch Vergleich des Buchwerts der jeweiligen Vermögenswerte mit dem erzielbaren Betrag bestimmt. Der erzielbare Betrag entspricht dem höheren Betrag aus dem Nutzungswert des Vermögenswerts und dem beizulegenden Zeitwert, abzüglich der Verkaufskosten. Falls ein Vermögenswert keine Mittelzuflüsse erzeugt, die weitgehend von den Mittelzuflüssen anderer Vermögenswerte oder Gruppen von Vermögenswerten unabhängig sind, wird die Überprüfung der Werthaltigkeit nicht auf Ebene eines einzelnen Vermögenswerts durchgeführt, sondern auf Ebene der zahlungsmittelgenerierenden Einheit, der der Vermögenswert zuzuordnen ist. Erachtet Siemens eine Abschreibung wegen Wertminderung für solche Vermögenswerte oder die jeweilige zahlungsmittelgenerierende Einheit als notwendig, entspricht diese dem Differenzbetrag zwischen dem Buchwert und dem niedrigeren erzielbaren Betrag. Kann der beizulegende Zeitwert nicht bestimmt werden, entspricht der erzielbare Betrag dem Nutzungswert des Vermögenswerts. Dieser Nutzungswert ist der sich durch Abzinsung der geschätzten zukünftigen Zahlungsströme ergebende Betrag. Sobald Hinweise vorliegen, dass die Gründe für die vorgenommenen Abschreibungen wegen Wertminderungen nicht länger existieren, überprüft Siemens die Notwendigkeit einer vollständigen oder teilweisen Wertaufholung.

Zu veräußernde Sachanlagen und Sonstige Immaterielle Vermögenswerte der Gesellschaft setzt Siemens mit dem niedrigeren Wert aus Buchwert und beizulegendem Zeitwert, abzüglich etwaiger Aufwendungen für den Verkauf, an; eine planmäßige Abschreibung nimmt Siemens nicht mehr vor.

**Nicht fortgeführte Aktivitäten und langfristige zur Veräußerung bestimmte Vermögenswerte** – Nicht fortgeführte Aktivitäten werden ausgewiesen, sobald ein Unternehmensbestandteil mit Geschäftsaktivitäten und Cashflows, die operativ und für die Zwecke der Rechnungslegung vom restlichen Unternehmen klar abgegrenzt werden können, als zur Veräußerung bestimmt klassifiziert wird oder bereits abgegangen ist und der Geschäftsbereich entweder (a) einen gesonderten wesentlichen Geschäftszweig oder geografischen Geschäftsbereich darstellt oder (b) Teil eines abgestimmten Gesamtplans zur Veräußerung eines gesonderten wesentlichen Geschäftszweigs oder geografischen Geschäftsbereichs ist oder (c) ein Tochterunternehmen darstellt, das ausschließlich mit Weiterveräußerungsabsicht erworben wurde.

Siemens weist einen langfristigen Vermögenswert (oder eine Veräußerungsgruppe) als zur Veräußerung gehalten aus, wenn der zugehörige Buchwert überwiegend durch ein Veräußerungsgeschäft und nicht durch fortgesetzte Nutzung realisiert wird. Damit dies der Fall ist, muss der Vermögenswert (oder die Veräußerungsgruppe) im gegenwärtigen Zustand zu Bedingungen, die für den Verkauf derartiger Vermögenswerte (oder Veräußerungsgruppen) gängig und üblich sind, sofort veräußerbar und eine solche Veräußerung höchstwahrscheinlich sein.

**Ertragsteuern** – Das Unternehmen wendet IAS 12, Ertragsteuern, an. Nach der darin enthaltenen Verbindlichkeitenmethode (*Liability method*) werden aktive und passive Latente Steuern mit der zukünftigen Steuerwirkung angesetzt, die sich aus den Unterschieden zwischen handels- und steuerrechtlicher Bilanzierung von Aktiv- und Passivposten ergeben. Die Auswirkungen von Steuersatzänderungen auf die Latenten Steuern erfasst Siemens erfolgswirksam in der Gewinn- und Verlustrechnung in dem Berichtszeitraum, in dem das der Steuersatzänderung zugrunde liegende Gesetzgebungsverfahren weitgehend abgeschlossen ist. Bei Änderungen auf Positionen mit erfolgsneutraler Erfassung im Eigenkapital erfolgt dies im Berichtszeitraum der Änderung ebenfalls mit erfolgsneutraler Erfassung im Eigenkapital. Latente Steueransprüche bilanziert Siemens in dem Maße, in dem es wahrscheinlich ist, dass zukünftige zu versteuernde Gewinne verfügbar sein werden. Gegen diese können die abzugsfähigen temporären Differenzen, die noch nicht genutzten steuerlichen Verluste sowie die noch nicht genutzten Steuergutschriften aufgerechnet werden.

**Vorräte** – Die Vorräte bilanziert Siemens mit dem niedrigeren Betrag aus Anschaffungs- beziehungsweise Herstellungskosten oder Nettoveräußerungswert. Angesetzt wird in der Regel ein Durchschnittswert oder ein auf Basis des FIFO-Verfahrens (first in, first out) ermittelter Wert. Bestandteile der Herstellungskosten sind, neben dem Fertigungsmaterial und den Fertigungslöhnen, die zurechenbaren Teile der Material- und Fertigungsgemeinkosten sowie die fertigungsbedingten Abschreibungen. Der Nettoveräußerungswert ist der geschätzte, im normalen Geschäftsgang erzielbare Verkaufserlös, abzüglich der geschätzten Kosten bis zur Fertigstellung und der Vertriebskosten.

**Leistungsorientierte Pläne (Defined-Benefit-Pläne)** – Siemens bewertet die Leistungsansprüche aus leistungsorientierten Plänen mit dem Anwartschaftsbarwertverfahren (projected unit credit method), das den versicherungsmathematischen



Barwert der bereits erdienten Anwartschaft reflektiert. Der Anwartschaftsbarwert der leistungsorientierten Verpflichtung (Defined Benefit Obligation – DBO) wird von Siemens unter Berücksichtigung zukünftiger erwarteter Gehalts- und Rentensteigerungen berechnet, da der bis zum regulären Pensionierungsalter erreichbare Leistungsanspruch von diesen abhängig ist. Bei Ansprüchen auf Krankenversicherungsleistungen nach Beendigung des Arbeitsverhältnisses berücksichtigt Siemens Trendannahmen für die medizinische Versorgung in der versicherungsmathematischen Bewertung.

Sind die Leistungsansprüche nicht durch externes Vermögen gedeckt, erfasst Siemens in der Bilanz die um nachzuverrechnende Aufwendungen/Erträge aus rückwirkenden Planänderungen (Past Service Cost) korrigierte DBO als Verbindlichkeit. Sind die Leistungsansprüche durch Fondsvermögen gedeckt, verrechnet Siemens den Marktwert dieses Vermögens mit der DBO. Der Nettobetrag, korrigiert um die noch nicht berücksichtigten Past Service Cost und die Effekte aus der Aktivierungsobergrenze (Asset Ceiling), wird als Pensionsverbindlichkeit oder -vermögenswert bilanziert.

Versicherungsmathematische Gewinne und Verluste, die zum Beispiel aus der Veränderung des Abzinsungsfaktors oder aus dem Unterschied zwischen tatsächlicher und erwarteter Rendite des Fondsvermögens entstehen, weist Siemens im Jahr ihrer Entstehung innerhalb der Konzern-Gesamtergebnisrechnung aus. Siemens berücksichtigt diese vollständig erfolgsneutral im Eigenkapital auf einer Nachsteuerbasis.

**Rückstellungen** – Siemens bilanziert eine Rückstellung, wenn das Unternehmen aus einem Ereignis in der Vergangenheit eine gegenwärtige rechtliche oder faktische Verpflichtung hat, es wahrscheinlich ist, dass wirtschaftliche Ressourcen abfließen, um diese Verpflichtung zu erfüllen, und eine verlässliche Schätzung der Höhe der Verpflichtung gemacht werden kann. Dabei ist eine Abzinsung immer dann vorzunehmen, wenn der Abzinsungseffekt wesentlich ist. Siemens setzt die Rückstellung in Höhe des Barwerts an, der sich aus der Abzinsung der erwarteten zukünftigen Zahlungsströme mit einem Vorsteuer-Zinssatz ergibt. Dieser spiegelt die aktuellen Markterwartungen im Hinblick auf den Zinseffekt wider. Wenn aus einem Vertrag ein Verlust droht, erfasst das Unternehmen die gegenwärtige Verpflichtung aus dem Vertrag als Drohverlustrückstellung. Diese wird mit dem niedrigeren Betrag bewertet, um den die zu erwartenden Kosten bei Erfüllung des Vertrags oder die zu erwartenden Kosten bei Nichterfüllung des Vertrags den erwarteten wirtschaftlichen Nutzen aus dem

Vertrag übersteigen. Zuführungen zu und Auflösungen von Rückstellungen berücksichtigt Siemens grundsätzlich erfolgswirksam. Der Buchwert des Sachanlagevermögens ist um den Barwert der rechtlichen Verpflichtungen aus der Stilllegung oder der Veräußerung von Sachanlagen zu erhöhen, die durch Erwerb, Erstellung, Entwicklung und/oder die gewöhnliche Nutzung des Anlageguts entstanden sind. Den zusätzlich aktivierten Betrag schreibt Siemens über die Restnutzungsdauer der zugehörigen Sachanlagegegenstände ab. Zuführungen zu und Verminderungen von dem Barwert der Verpflichtung aus der Stilllegung oder der Veräußerung von Sachanlagen, die sich aus Änderungen von Schätzungen ergeben, werden im Allgemeinen bilanzverlängernd durch Anpassung des Buchwerts der zugehörigen Vermögenswerte und der Rückstellung erfasst. Einen bei der Erfüllung der Verpflichtung entstehenden positiven oder negativen Differenzbetrag zum Buchwert erfasst das Unternehmen erfolgswirksam.

**Leistungen aus Anlass der Beendigung des Arbeitsverhältnisses** – Leistungen aus Anlass der Beendigung des Arbeitsverhältnisses werden in der Periode erfasst, in der sie anfallen und eine verlässliche Einschätzung möglich ist. Leistungen aus Anlass der Beendigung des Arbeitsverhältnisses nach IAS 19 sind dann als Aufwand und Verbindlichkeit zu erfassen, wenn sich die Gesellschaft im Rahmen eines formalen Plans oder durch anderweitige Erzeugung einer gerechtfertigten Erwartung nachweislich verpflichtet hat, Leistungen bei Beendigung des Arbeitsverhältnisses aufgrund eines Angebots zur Förderung eines freiwilligen vorzeitigen Ausscheidens oder einer vorzeitigen Beendigung vor Eintritt des normalen Renteneintrittsalters zu erbringen.

**Finanzinstrumente** – Finanzinstrumente sind alle Verträge, die einen finanziellen Vermögenswert bei der einen Gesellschaft und eine finanzielle Verbindlichkeit oder ein Eigenkapitalinstrument bei einer anderen Gesellschaft begründen. Die finanziellen Vermögenswerte des Unternehmens beinhalten im Wesentlichen Zahlungsmittel und Zahlungsmitteläquivalente, Zur Veräußerung verfügbare finanzielle Vermögenswerte, Forderungen aus Lieferungen und Leistungen, Darlehensforderungen, Forderungen aus Finanzierungs-Leasing sowie derivative Finanzinstrumente mit positivem Marktwert. Zahlungsmittel und Zahlungsmitteläquivalente stuft Siemens nicht in die Kategorie *Zur Veräußerung verfügbare finanzielle Vermögenswerte* ein, da diese Finanzinstrumente bei Siemens keinen Wertschwankungen unterliegen. Von der Kategorie *Bis zur Endfälligkeit gehaltene Finanzinstrumente* macht Siemens keinen Gebrauch. Die finanziellen Verbindlichkeiten

des Unternehmens umfassen vor allem Anleihen und Schuldverschreibungen, Verbindlichkeiten gegenüber Kreditinstituten, Commercial Papers, Verbindlichkeiten aus Lieferungen und Leistungen, Verbindlichkeiten aus Finanzierungsleasing sowie derivative Finanzinstrumente mit negativem Marktwert. Siemens macht von der Möglichkeit, finanzielle Vermögenswerte oder finanzielle Verbindlichkeiten beim erstmaligen Ansatz als erfolgswirksam zum beizulegenden Zeitwert einzustufen (Fair Value Option), keinen Gebrauch. Finanzinstrumente werden bei Siemens, unter Zugrundelegung der Wesensart, in die Klasse von *Zu Anschaffungskosten oder Zu fortgeführten Anschaffungskosten bewertete Finanzielle Vermögenswerte und Verbindlichkeiten* sowie in die Klasse von *Zum Marktwert bewertete Finanzielle Vermögenswerte und Verbindlichkeiten* sowie in die Klasse *Forderungen aus Finanzierungs-Leasing* unterteilt. Für weitere Informationen siehe »Ziffer 31 und 32«.

Finanzinstrumente werden in der Bilanz erfasst, sofern für Siemens eine vertragliche Verpflichtung aufgrund des Finanzinstruments entsteht. Marktübliche Käufe oder Verkäufe finanzieller Vermögenswerte, das heißt Käufe oder Verkäufe, bei denen die Lieferung des Vermögenswerts innerhalb des für den jeweiligen Handelsplatz vorgeschriebenen oder durch Konventionen festgelegten Zeitrahmens erfolgen muss, bilanziert Siemens zum Handelstag.

Der erstmalige Ansatz von Finanzinstrumenten erfolgt zum beizulegenden Zeitwert. Die dem Erwerb oder der Emission von Finanzinstrumenten direkt zurechenbaren Transaktionskosten berücksichtigt Siemens bei der Ermittlung des Buchwerts nur, soweit es die Finanzinstrumente nicht erfolgswirksam zum beizulegenden Zeitwert bewertet. Der Ansatz von Forderungen aus Finanzierungsleasing erfolgt in Höhe der Nettoinvestition in das Leasingverhältnis. Die Folgebewertung finanzieller Vermögenswerte und Verbindlichkeiten erfolgt entsprechend der Kategorie, der sie zugeordnet sind – den Zahlungsmitteln und Zahlungsmitteläquivalenten, den Zur Veräußerung verfügbaren finanziellen Vermögenswerten, den Darlehen und Forderungen, den finanziellen Verbindlichkeiten, bilanziert zu fortgeführten Anschaffungskosten, oder den zu Handelszwecken gehaltenen finanziellen Vermögenswerten und Verbindlichkeiten.

**Zahlungsmittel und Zahlungsmitteläquivalente** – Die Zahlungsmitteläquivalente umfassen alle liquiditätsnahen Vermögenswerte, die zum Zeitpunkt der Anschaffung beziehungsweise der Anlage eine Restlaufzeit von weniger als drei

Monaten haben. Zahlungsmittel und Zahlungsmitteläquivalente bewertet Siemens zu Anschaffungskosten.

**Zur Veräußerung verfügbare finanzielle Vermögenswerte** – Anlagen in Eigenkapitalinstrumente, Schuldinstrumente und Fondsanteile werden als Zur Veräußerung verfügbare finanzielle Vermögenswerte klassifiziert und zum beizulegenden Zeitwert bewertet, wenn dieser verlässlich ermittelt werden kann. Unrealisierte Gewinne und Verluste werden nach Berücksichtigung von latenten Steuern in der Position Sonstiges Ergebnis ausgewiesen. Sofern ein beizulegender Zeitwert nicht verlässlich ermittelbar ist, bewertet Siemens die zur Veräußerung verfügbaren finanziellen Vermögenswerte zu Anschaffungskosten. Dies ist bei Eigenkapitalinstrumenten der Fall, für die kein auf einem aktiven Markt notierter Preis vorliegt und wesentliche Parameter zur Bestimmung des beizulegenden Zeitwerts mithilfe von Bewertungsmodellen nicht mit hinreichender Sicherheit ermittelt werden können.

Fallen die beizulegenden Zeitwerte von Zur Veräußerung verfügbaren finanziellen Vermögenswerten unter die Anschaffungskosten und liegen objektive Hinweise vor, dass der Vermögenswert wertgemindert ist, löst Siemens den direkt im Eigenkapital erfassten kumulierten Verlust auf und berücksichtigt ihn in der Konzern-Gewinn- und Verlustrechnung. Bei seiner Einschätzung der möglichen Wertminderungen bezieht das Unternehmen alle verfügbaren Informationen ein, wie zum Beispiel die Marktbedingungen und die Marktpreise, anlagespezifische Faktoren sowie Dauer und Ausmaß des Wertrückgangs unter die Anschaffungskosten. Überschreitet die Abnahme 20% der Anschaffungskosten oder dauert bereits sechs Monate, betrachtet Siemens dies als einen objektiven Hinweis auf eine Wertminderung. Wertminderungen eines Schuldinstruments macht Siemens in den Folgeperioden rückgängig, sofern die Gründe für die Wertminderung entfallen sind.

**Darlehen und Forderungen** – Finanzielle Vermögenswerte, die als Darlehen und Forderungen klassifiziert wurden, bewertet Siemens zu fortgeführten Anschaffungskosten, abzüglich der Wertminderungen, wobei das Unternehmen die Effektivzinsmethode anwendet. Wertminderungen von Forderungen aus Lieferungen und Leistungen und sonstigen Forderungen erfasst Siemens auf separaten Wertberichtigungskonten (für weitere Informationen zur Bestimmung von Wertminderungen siehe »Ziffer 3«). Unverzinsliche oder niedrig verzinsliche Forderungen mit Laufzeiten von über einem Jahr werden abgezinst.

**Finanzielle Verbindlichkeiten** – Siemens bewertet die finanziellen Verbindlichkeiten, mit Ausnahme der derivativen Finanzinstrumente, unter Anwendung der Effektivzinsmethode zu fortgeführten Anschaffungskosten.

**Derivative Finanzinstrumente** – Derivative Finanzinstrumente, wie Devisentermingeschäfte und Zinsswaps, bilanziert Siemens zum beizulegenden Zeitwert. Die Instrumente, die nicht als Sicherungsinstrumente vorgesehen sind und für die kein Hedge Accounting angewendet wird, stuft das Unternehmen als zu Handelszwecken gehalten ein. Die Veränderung des beizulegenden Zeitwerts der derivativen Finanzinstrumente weist das Unternehmen periodengerecht entweder in der Gewinn- und Verlustrechnung oder, sofern es sich um einen Cashflow Hedge handelt, nach der Berücksichtigung von Latenten Steuern in der Position *Sonstiges Ergebnis* aus. Bestimmte derivative Finanzinstrumente, die in einem Basisvertrag (Host Contract) eingebettet sind, bilanziert Siemens separat.

**Fair Value Hedges** – Der Buchwert des Grundgeschäfts wird um den Gewinn oder Verlust aus diesem Geschäft, der dem abgesicherten Risiko zuzurechnen ist, erhöht oder vermindert. Handelt es sich bei dem Grundgeschäft um einen nicht bilanzierten schwebenden Vertrag, dann stellt Siemens die nachfolgende kumulierte Änderung seines Marktwerts als separaten finanziellen Vermögenswert oder als Verbindlichkeit in die Bilanz ein; einen entsprechenden Ertrag oder Aufwand erfasst das Unternehmen in der Gewinn- und Verlustrechnung.

Bei Grundgeschäften, die zu fortgeführten Anschaffungskosten bilanziert werden, löst Siemens die Erhöhung oder Verminderung des Buchwerts bis zur Fälligkeit des Grundgeschäfts vollständig auf. Bei abgesicherten schwebenden Verträgen erhöht oder vermindert das Unternehmen die Buchwerte der Vermögenswerte oder der Verbindlichkeiten, die aus der Erfüllung der schwebenden Verträge hervorgehen, im Zugangszeitpunkt um die kumulierten Marktwertänderungen der vorher separat bilanzierten finanziellen Vermögenswerte oder Verbindlichkeiten.

**Cashflow Hedges** – Den effektiven Teil der Marktwertänderungen derivativer Instrumente, die als Cashflow Hedges bestimmt sind, erfasst Siemens nach Berücksichtigung von Latenten Steuern in der Position *Sonstiges Ergebnis*. Der ineffektive Teil wird sofort erfolgswirksam in der Gewinn- und Verlustrechnung erfasst. Die im Eigenkapital aufgelaufenen

Beträge werden in den Geschäftsjahren in der Gewinn- und Verlustrechnung erfasst, in denen das Grundgeschäft die Gewinn- und Verlustrechnung beeinflusst. Für weitere Informationen siehe »Ziffer 32«.

**Aktienbasierte Vergütung** – Nach IFRS 2 wird bei der aktienbasierten Vergütung zwischen Transaktionen mit Barausgleich und solchen mit Eigenkapitalabgeltung unterschieden. Für beide Instrumente wird der beizulegende Zeitwert zum Gewährungszeitpunkt ermittelt. Dieser wird dann als Vergütungsaufwand über den Erdienungszeitraum erfasst, innerhalb dessen die Arbeitnehmer einen uneingeschränkten Anspruch auf die zugesagten Instrumente erwerben. Zusagen mit Barausgleich bewertet Siemens zu jedem Ende einer Berichtsperiode und am Erfüllungstag zum beizulegenden Zeitwert neu. Um die beizulegenden Zeitwerte von Aktienoptionen, die im Rahmen aktienorientierter Leistungen gewährt wurden, zu berechnen, verwendet das Unternehmen ein Optionspreismodell. Für andere aktienorientierte Leistungen wie Aktienzusagen, Matching-Aktien und Jubiläumsaktien bestimmt Siemens den beizulegenden Zeitwert als den Börsenkurs der Siemens-Aktie unter Berücksichtigung des Barwerts der Dividenden, auf die während des Erdienungszeitraums kein Anspruch besteht, und – soweit vorhanden – bestimmter Nicht-Ausübungsbedingungen. Weitere Informationen zu den aktienbasierten Zusagen finden sich in »Ziffer 34«.

**Vorjahresinformationen** – Einzelne Vorjahresangaben sind aus Gründen der besseren Vergleichbarkeit an die aktuelle Darstellung angepasst worden. Insbesondere verabschiedete das IASB im Mai 2008 einen Standard zur Verbesserung der International Financial Reporting Standards. In der Kapitalflussrechnung sind demnach gemäß einer Änderung des IAS 7, *Kapitalflussrechnungen*, Zahlungsströme im Zusammenhang mit der Herstellung oder dem Erwerb von Vermögenswerten, die im Rahmen der gewöhnlichen Geschäftstätigkeit zur Vermietung und zum anschließenden Verkauf gehalten werden, als Mittelabflüsse aus der laufenden Geschäftstätigkeit darzustellen. Bislang wurden Auszahlungen in Zusammenhang mit Operating-Leasingverträgen dem Mittelabfluss aus Investitionstätigkeit zugeordnet. Diese Änderung ist für Geschäftsjahre anzuwenden, die am oder nach dem 1. Januar 2009 beginnen. Siemens berücksichtigt diese Änderung unter Anpassung des Vorjahrs in der Kapitalflussrechnung ab dem Geschäftsjahr 2010. Der rückwirkend im Geschäftsjahr 2010 angewendete, überarbeitete IAS 1 führte zu einer Umgliederung von bestimmten derivativen Finanzinstrumenten von kurzfristig zu langfristig, soweit sie nicht die Voraussetzun-

gen für die Anwendung von Hedge Accounting erfüllen. Die Umgliederung zum 30. September 2008 von *Sonstige kurzfristige finanzielle Vermögenswerte* beziehungsweise *Sonstige kurzfristige finanzielle Verbindlichkeiten* in *Sonstige finanzielle Vermögenswerte* beziehungsweise in *Sonstige finanzielle Verbindlichkeiten* beträgt 227 EUR beziehungsweise 334 EUR. Die Umgliederung zum 30. September 2009 von *Sonstige kurzfristige finanzielle Vermögenswerte* beziehungsweise *Sonstige kurzfristige finanzielle Verbindlichkeiten* in *Sonstige finanzielle Vermögenswerte* beziehungsweise in *Sonstige finanzielle Verbindlichkeiten* beträgt 507 EUR bzw. 555 EUR. Beginnend mit dem Geschäftsjahr 2010 weist Siemens den gesamten Zinsertrag und Zinsaufwand getrennt in der Konzern-Gewinn- und Verlustrechnung gemäß dem zweiten Teil des jährlichen Verbesserungsprojekts des IASB aus dem Jahr 2008 aus. Zusätzlich wurden das pensionsbezogene Zinsergebnis sowie Wertminderungen auf nach der Equity-Methode bilanzierte Beteiligungen und auf nicht kurzfristige Zur Veräußerung verfügbare finanzielle Vermögenswerte, abzüglich der Zuschreibungen aus Wertaufholung, rückwirkend in der Konzern-Kapitalflussrechnung umgegliedert, um mit dem Ausweis des laufenden Geschäftsjahrs übereinzustimmen.

### Kürzlich umgesetzte Rechnungslegungsverlautbarungen

Im Januar 2008 veröffentlichte das IASB die überarbeiteten Standards IFRS 3, *Unternehmenszusammenschlüsse* (IFRS 3 (2008)), und IAS 27, *Konzern- und separate Einzelabschlüsse* nach IFRS (IAS 27 (2008)), die im Geschäftsjahr 2009 von der EU übernommen wurden. Die überarbeiteten Standards sind verpflichtend für Geschäftsjahre anzuwenden, die am oder nach dem 1. Juli 2009 beginnen, und werden von Siemens ab dem Geschäftsjahr 2010 inklusive entsprechender Anpassungen in IFRS 2, IFRS 7 und IAS 39 angewendet.

In IFRS 3 (2008) wird die Anwendung der Akquisitionsmethode bei Unternehmenszusammenschlüssen neu geregelt. Wesentliche Neuerungen betreffen die Bewertung von nicht beherrschenden Anteilen, die Erfassung von sukzessiven Unternehmenserwerben und die Behandlung von bedingten Kaufpreisbestandteilen und Anschaffungsnebenkosten. Nach der Neuregelung kann die Bewertung von nicht beherrschenden Anteilen entweder zum beizulegenden Zeitwert (Full-Goodwill-Methode) oder zum anteiligen beizulegenden Zeitwert des identifizierbaren Nettovermögens erfolgen. Bei sukzessiven Unternehmenserwerben ist eine erfolgswirksame Neubewertung zum Zeitpunkt des Beherrschungsübergangs gehaltenen Anteilen vorgesehen. Eine Anpassung bedingter Kaufpreisbestandteile, die zum Zeitpunkt des Er-

werbs als Verbindlichkeit ausgewiesen werden, ist zukünftig erfolgswirksam zu erfassen. Anschaffungsnebenkosten werden zum Zeitpunkt ihres Entstehens als Aufwand erfasst.

Wesentliche Änderungen des IAS 27 (2008) betreffen die Bilanzierung von Transaktionen ohne Kontrollübergang sowie Transaktionen mit Kontrollwechsel. Transaktionen, die nicht zu einem Beherrschungsverlust führen, sind erfolgsneutral als Eigenkapitaltransaktion zu erfassen. Verbleibende Anteile sind zum Zeitpunkt des Beherrschungswechsels hingegen zum beizulegenden Zeitwert zu bewerten. Nach dem überarbeiteten Standard ist bei nicht beherrschenden Anteilen der Ausweis von Negativsalden zulässig, da sowohl Gewinne als auch Verluste zukünftig unbegrenzt beteiligungsproportional zugerechnet werden.

Im September 2007 veröffentlichte das International Accounting Standards Board IAS 1, *Darstellung des Jahresabschlusses (überarbeitet)*, (IAS 1). IAS 1 ersetzt IAS 1, *Darstellung des Jahresabschlusses (überarbeitet in 2003)*, in der Fassung von 2005. Die Überarbeitung zielt darauf ab, die Möglichkeiten der Analyse sowie der Vergleichbarkeit von Jahresabschlüssen für deren Nutzer zu verbessern. IAS 1 regelt die Grundlagen für die Darstellung und Struktur des Abschlusses. Es enthält zudem Mindestanforderungen an den Inhalt eines Abschlusses. Der neue Standard ist für die Geschäftsjahre anzuwenden, die am oder nach dem 1. Januar 2009 beginnen. Siemens wendet die Neuregelung erstmals für den Konzernabschluss des Geschäftsjahrs 2010 rückwirkend für alle Berichtsperioden an.

Im Geschäftsjahr 2010 hat das Unternehmen ebenso IAS 7, *Kapitalflussrechnung* (rückwirkend), und IAS 16, *Sachanlagen*, in Verbindung mit den Verbesserungen 2008 der IFRS und mit dem IAS 23, *Fremdkapitalkosten (überarbeitet 2007)*, angewendet.

Im März 2009 veröffentlichte das IASB *Verbesserung der Angaben zu Finanzinstrumenten (Anpassung des IFRS 7, Finanzinstrumente: Angaben)* zur Erweiterung der Berichterstattung über die Fair-Value-Bewertung von Finanzinstrumenten. Die Änderung betrifft die Einführung einer dreistufigen Fair-Value-Hierarchie für Berichterstattungszwecke. Diese unterscheidet Fair Values nach Bedeutung der in die Bewertung einbezogenen Inputparameter und verdeutlicht, inwiefern beobachtbare Marktdaten bei der Ermittlung des beizulegenden Zeitwerts verfügbar sind. Des Weiteren sollen die Angaben zum Liquiditätsrisiko verbessert werden, indem der Umfang der in einen Fälligkeitsspiegel einzubeziehenden Verbindlich-

keiten klargestellt wird. Siemens hat sich dafür entschieden, den neu gefassten IFRS 7 vorzeitig bereits im Konzernabschluss des Geschäftsjahrs 2009 anzuwenden.

### Kürzlich veröffentlichte Rechnungslegungsverlautbarungen – noch nicht umgesetzt

Die nachfolgende, vom IASB veröffentlichte Rechnungslegungsverlautbarung ist noch nicht verpflichtend anzuwenden und ist auch von Siemens bislang noch nicht angewendet worden:

Im November 2009 veröffentlichte das IASB IFRS 9, *Finanzinstrumente*. Dieser Standard beinhaltet die erste Phase des dreiphasigen IASB-Projekts, den bestehenden IAS 39, *Finanzinstrumente: Ansatz und Bewertung*, zu ersetzen. IFRS 9 ändert die Ansatz- und Bewertungsvorschriften von finanziellen Vermögenswerten, einschließlich verschiedener hybrider Verträge. Er verwendet einen einheitlichen Ansatz, einen finanziellen Vermögenswert zu fortgeführten Anschaffungskosten oder zum beizulegenden Zeitwert zu bilanzieren, der die verschiedenen Regelungen des IAS 39 ersetzt. Der Ansatz in IFRS 9 basiert darauf, wie ein Unternehmen seine Finanzinstrumente steuert (Geschäftsmodell), und auf der Art der vertraglich vereinbarten Zahlungsströme der finanziellen Vermögenswerte. Der neue Standard verlangt weiterhin eine einheitlich zu verwendende Wertminderungsmethode, die die unterschiedlichen Methoden innerhalb des IAS 39 ersetzen wird. Der Standard ist verpflichtend für Geschäftsjahre anzuwenden, die am oder nach dem 1. Januar 2013 beginnen, wobei eine frühere Anwendung gestattet ist. Die European Financial Reporting Advisory Group hat die Empfehlung zur Übernahme des IFRS in der EU verschoben, um sich mehr Zeit für die Begutachtung der Ergebnisse des IASB-Projekts zur Verbesserung der Bilanzierung von Finanzinstrumenten zu nehmen. Das Unternehmen überprüft derzeit die Auswirkungen der Anwendung auf den Konzernabschluss.

Das IASB hat eine Reihe weiterer Verlautbarungen in der Berichtsperiode veröffentlicht. Die kürzlich umgesetzten Rechnungslegungsverlautbarungen sowie die Verlautbarungen, die noch nicht umgesetzt wurden, hatten keinen wesentlichen Einfluss auf den Konzernabschluss von Siemens.

## 3 – Schätz- und prämissensensitive Bilanzierungsgrundsätze

Siemens erstellt den Konzernabschluss im Einklang mit den IFRS, wie sie vom IASB herausgegeben wurden und in der EU

anzuwenden sind. Die Kenntnis der Grundlagen des Konzernabschlusses, wie unter »Ziffer 2« zum Konzernabschluss dargestellt, ist erforderlich, um unsere Darstellung der Vermögens-, Finanz- und Ertragslage zu verstehen. In bestimmten Fällen ist es notwendig, schätz- und prämissensensitive Bilanzierungsgrundsätze anzuwenden. Diese beinhalten komplexe und subjektive Bewertungen sowie Schätzungen, die auf Sachverhalten beruhen, die von Natur aus ungewiss sind und Veränderungen unterliegen können. Schätz- und prämissensensitive Bilanzierungsgrundsätze können sich im Zeitablauf verändern und die Darstellung der Vermögens-, Finanz- und Ertragslage der Gesellschaft erheblich beeinflussen. Außerdem können sie Annahmen enthalten, die die Unternehmensleitung in derselben Berichtsperiode aus gleichermaßen vernünftigen Gründen auch anders hätte treffen können. Die Unternehmensleitung weist darauf hin, dass zukünftige Ereignisse häufig von Prognosen abweichen und Schätzungen routinemäßige Anpassungen erfordern.

**Umsatzrealisierung bei Auftragsfertigung** – Die Sektoren der Gesellschaft, insbesondere Energy und Industry, wickeln einen wesentlichen Teil ihres Geschäfts über Fertigungsaufträge mit den Kunden ab. Im Anlagenprojektgeschäft erfolgt die Umsatzrealisierung in der Regel nach der »Percentage-of-Completion«-Methode entsprechend dem Leistungsfortschritt. Bei einigen langfristigen Dienstleistungsaufträgen erfolgt die Umsatzrealisierung ebenfalls nach der »Percentage-of-Completion«-Methode. Bei dieser Methode kommt es besonders auf die sorgfältige Einschätzung des Fertigstellungsgrads an. Je nachdem, welche Methodik verwendet wird, um den Leistungsfortschritt zu bestimmen, zählen die Gesamtauftragskosten, die noch bis zur Fertigstellung anfallenden Kosten, die Gesamtauftragserlöse, die Auftragsrisiken und andere Einschätzungen zu den maßgeblichen Schätzgrößen. Das Management der operativen Divisionen überprüft kontinuierlich alle Einschätzungen in Zusammenhang mit solchen Fertigungsaufträgen und passt diese gegebenenfalls an. Die »Percentage-of-Completion«-Methode wendet das Unternehmen auch bei direkt oder indirekt von Siemens finanzierten Projekten an. Voraussetzung für die Anwendung dieser Bilanzierungsmethode ist, dass die Bonität des Kunden, die Siemens Financial Services (SFS) im Auftrag des Vorstands des Unternehmens auf der Basis eines Ratings oder einer Kreditwürdigkeitsprüfung beurteilt, bestimmten Mindestanforderungen genügt. Zusätzlich besteht als Voraussetzung für diese Bilanzierungsmethode, dass die Kreditwürdigkeit mindestens einem B-Rating externer Ratingagenturen oder einem äquivalenten SFS-Rating entspricht. In den Fällen, in denen die Bonität diesen Anforderungen nicht genügt, realisiert



Siemens die Umsätze für Fertigungsaufträge und für finanzierte Projekte auf der Basis unwiderruflicher Zahlungseingänge oder – soweit dieser niedriger ist – auf der Basis des Fertigstellungsgrads. Das Unternehmen hält die eingesetzten Ratingverfahren für eine verlässliche Methode, die Kundenbonität zu beurteilen.

**Forderungen aus Lieferungen und Leistungen und sonstige Forderungen** – Die Wertberichtigung zweifelhafter Forderungen umfasst in erheblichem Maß Einschätzungen und Beurteilungen einzelner Forderungen, die auf der Kreditwürdigkeit des jeweiligen Kunden, den aktuellen Konjunkturlagen und der Analyse historischer Forderungsausfälle auf Portfoliobasis beruhen. Um die länderspezifische Komponente der individuellen Wertberichtigung zu bestimmen, berücksichtigt Siemens auch Länderratings, die zentral auf der Basis der Beurteilungen externer Ratingagenturen ermittelt werden. Soweit das Unternehmen die Wertberichtigung aus historischen Ausfallraten auf Portfoliobasis ableitet, vermindert ein Rückgang des Forderungsvolumens solche Vorsorgen entsprechend und umgekehrt. Zum 30. September 2010 und 2009 betrug die gesamte Wertberichtigung auf Forderungen aus Lieferungen und Leistungen 1.161 EUR beziehungsweise 1.281 EUR.

**Wertminderungen** – Siemens überprüft die Geschäfts- und Firmenwerte mindestens einmal jährlich auf mögliche Wertminderung in Übereinstimmung mit den Konzern-Rechnungslegungsmethoden. Die Bestimmung des erzielbaren Betrags einer Division, der der Goodwill zugeordnet wurde, ist mit Schätzungen des Managements verbunden. Das auf Basis von diesen Schätzungen prognostizierte Ergebnis wird zum Beispiel von Faktoren wie einer erfolgreichen Integration von akquirierten Unternehmen, der Volatilität auf dem Kapitalmarkt sowie den Schwankungen des Währungskurses beeinflusst. Der erzielbare Betrag ist der höhere Wert aus dem beizulegenden Zeitwert der Division, abzüglich der Verkaufskosten, und dem Nutzungswert. Die Gesellschaft bestimmt diese Werte grundsätzlich mittels Bewertungsmethoden, die auf diskontierten Zahlungsströmen (Cashflows) basieren. Diesen diskontierten Cashflows liegen Fünf-Jahres-Prognosen zugrunde, die auf vom Management genehmigten Finanzplänen aufbauen. Die Cashflow-Prognosen berücksichtigen Erfahrungen der Vergangenheit und basieren auf der besten vom Management vorgenommenen Einschätzung zukünftiger Entwicklungen. Cashflows jenseits der Planungsperiode werden unter Anwendung individueller Wachstumsraten extrapoliert. Die wichtigsten Annahmen, auf denen die Ermittlung des beizulegenden Zeitwerts abzüglich der Verkaufskosten

und dem Nutzungswert basiert, beinhalten geschätzte Wachstumsraten, gewichtete durchschnittliche Kapitalkosten und Steuersätze. Diese Prämissen sowie die zugrunde liegende Methodik können einen erheblichen Einfluss auf die jeweiligen Werte und letztlich auf die Höhe einer möglichen Wertminderung des Goodwills haben. Im Geschäftsjahr 2010 wurde auf den Geschäfts- und Firmenwert der Division Diagnostics im Sektor Healthcare eine Wertminderung in Höhe von 1,145 Mrd. EUR vorgenommen. Für weitere Informationen sowie zu den Parametern der Wertminderungsüberprüfung der Division Diagnostics des Sektors Healthcare siehe »Ziffer 16«.

Sofern Sachanlagen, Sonstige immaterielle Vermögenswerte und nach der Equity-Methode bilanzierte Beteiligungen auf Wertminderungen getestet werden, ist die Bestimmung des erzielbaren Betrags der Vermögenswerte gleichermaßen mit Schätzungen des Managements verbunden, was einen erheblichen Einfluss auf die jeweiligen Werte und letztlich auf die Höhe einer möglichen Wertminderung haben kann.

Im vierten Quartal des Geschäftsjahrs 2009 wurde NSN, das im Segment Equity Investments berichtet wird, auf Wertminderung überprüft. Die Überprüfung wurde im Wesentlichen durch den Verlust von Marktanteilen von NSN sowie durch einen Rückgang im Produktgeschäft von NSN ausgelöst. Diese Sachverhalte führten bei NSN zu einer wesentlichen Anpassung zukünftig zu erwartender Zahlungsmittelzuflüsse. Die Prüfung auf Wertminderung wurde auf Basis des beizulegenden Zeitwerts, abzüglich Verkaufskosten unter Anwendung der Barwertmethode durchgeführt. Hieraus ergab sich ein Wertminderungsaufwand in Höhe von 1.634 EUR im Geschäftsjahr 2009. Ob in Zukunft eine weitere Wertminderung unserer Beteiligung an NSN notwendig ist, hängt davon ab, ob NSN es schafft zu wachsen und/oder anderweitig zu höherer Profitabilität zurückzufinden.

**Bilanzierung von Leistungen an Arbeitnehmer** – Pensionen und ähnliche Verpflichtungen – Verpflichtungen für Pensionen und sonstige Leistungen nach Beendigung des Arbeitsverhältnisses und damit zusammenhängende Aufwendungen und Erträge werden in Übereinstimmung mit versicherungsmathematischen Bewertungen ermittelt. Diese Bewertungen beruhen auf Schlüsselprämissen, darunter Abzinsungsfaktoren, die erwartete Rendite des Fondsvermögens, Gehaltstrends, Lebenserwartungen und Trendannahmen zur medizinischen Versorgung. Die angesetzten Abzinsungsfaktoren werden auf Grundlage der Renditen bestimmt, die am Ende der Berichtsperiode für erstrangige, festverzinsliche Industrie-



anleihen mit entsprechender Laufzeit und Währung erzielt werden. Falls solche Renditen nicht verfügbar sind, basieren die Abzinsungsfaktoren auf Marktrenditen von Regierungsanleihen. Die erwarteten Erträge des Fondsvermögens werden mittels einheitlicher Vorgehensweise unter Berücksichtigung historischer langfristiger Renditen und der Portfoliostruktur bestimmt. Aufgrund schwankender Markt- und Wirtschaftslage können die zugrunde gelegten Prämissen von der tatsächlichen Entwicklung abweichen, was wesentliche Auswirkungen auf die Verpflichtungen für Pensionen und sonstige Leistungen nach Beendigung des Arbeitsverhältnisses haben kann. Die hieraus resultierenden Differenzen werden in der Periode ihres Entstehens direkt im Eigenkapital erfasst und sind damit nicht erfolgswirksam. Weitere Erläuterungen bezüglich des gegenwärtigen Finanzierungsstatus und einer Sensitivitätsanalyse im Hinblick auf die Auswirkung bestimmter Prämissen auf den periodenbezogenen Nettopensionsaufwand finden sich unter »Ziffer 24«.

Leistungen aus Anlass der Beendigung des Arbeitsverhältnisses – Siemens führt Restrukturierungsprogramme auf einer einzelvertraglichen Ebene fort. Aufwendungen in Zusammenhang mit der Beendigung von Arbeitsverhältnissen sowie sonstige Aufwendungen für Austritte unterliegen erheblichen Schätzungen und Annahmen (siehe »Ziffer 5« für weitere Informationen).

**Rückstellungen** – Die Bestimmung von Rückstellungen für drohende Verluste aus Aufträgen, von Gewährleistungsrückstellungen, Rückbau-, Stilllege- und ähnlichen Verpflichtungen und von Rückstellungen für Rechtsstreitigkeiten ist in erheblichem Maß mit Einschätzungen verbunden. Ein wesentlicher Teil des Geschäfts einiger operativer Divisionen wird über langfristige Verträge abgewickelt. Dabei handelt es sich häufig um Großprojekte in Deutschland oder im Ausland, die auf der Basis von Ausschreibungen vergeben werden. Siemens bildet dann eine Rückstellung für drohende Verluste aus Aufträgen, wenn die aktuell geschätzten Gesamtkosten die aus dem jeweiligen Vertrag zu erwartenden Umsatzerlöse übersteigen. Diese Einschätzungen können sich infolge neuer Informationen mit zunehmendem Projektfortschritt ändern. Verlustaufträge identifiziert Siemens durch die laufende Kontrolle des Projektfortschritts und die Aktualisierung der kalkulierten Gesamtkosten. Dies erfordert ebenfalls in erheblichem Maß Einschätzungen bezüglich der Erfüllung bestimmter Leistungsanforderungen, wie zum Beispiel im IT-Service-Geschäft, in der Division Mobility, der Division Industry Solutions, der Division Workflow and Solutions und im Sektor

Energy, sowie hinsichtlich der Gewährleistungsaufwendungen. Erhebliche Schätzungen und Annahmen werden auch in Bezug auf die Bestimmung von Rückstellungen für wesentliche Rückbau-, Stilllege- und ähnliche Verpflichtungen getroffen. Unsicherheiten, bezogen auf den anzusetzenden Betrag, umfassen zum Beispiel die geschätzten Kosten der Stilllegung aufgrund des langen Zeitraums, über den die künftigen Zahlungsmittelabflüsse erwartet werden, sowie die zugehörige Aufzinsung. Die geschätzten Zahlungsmittelabflüsse könnten sich unter anderem dann wesentlich ändern, wenn die Pläne der Regierung, das Endlager bereitzustellen, durch politische Entwicklungen beeinflusst werden. Für weitere Erläuterungen zu wesentlichen Rückbau-, Stilllege- und ähnlichen Verpflichtungen siehe »Ziffer 25, Rückstellungen«.

Siemens ist in unterschiedlichen Jurisdiktionen mit Rechtsstreitigkeiten und regulatorischen Verfahren konfrontiert. Diese Verfahren können dazu führen, dass Siemens straf- oder zivilrechtliche Sanktionen, Geldbußen oder Vorteilsabschöpfungen auferlegt werden. Siemens bildet eine Rückstellung für Rechtsstreitigkeiten, regulatorische Verfahren oder behördliche Untersuchungen, wenn es wahrscheinlich ist, dass in Zusammenhang mit diesen Verfahren eine Verpflichtung entstanden ist, die wahrscheinlich zu zukünftigen Mittelabflüssen führen wird und hinsichtlich ihrer Höhe verlässlich schätzbar ist. Rechtsstreitigkeiten, regulatorischen Verfahren oder behördlichen Untersuchungen liegen häufig komplexe rechtliche Fragestellungen zugrunde und sind mit erheblichen Unsicherheiten verbunden. Entsprechend liegt der Beurteilung, ob zum Stichtag eine gegenwärtige Verpflichtung als Ergebnis eines Ereignisses in der Vergangenheit besteht, ob ein zukünftiger Mittelabfluss wahrscheinlich und die Verpflichtung verlässlich schätzbar ist, ein erhebliches Ermessen durch das Management zugrunde. Siemens beurteilt den jeweiligen Stand eines Verfahrens regelmäßig, auch unter Einbeziehung externer Anwälte. Eine Beurteilung kann aufgrund neuer Informationen zu ändern sein. Es kann notwendig werden, dass die Höhe einer Rückstellung für ein laufendes Verfahren aufgrund neuer Entwicklungen in Zukunft angepasst werden muss. Veränderungen von Schätzungen und Prämissen im Zeitablauf können eine wesentliche Auswirkung auf die künftige Ertragslage haben. Bei Ausgang des Verfahrens könnten Siemens Aufwendungen entstehen, die die für den Sachverhalt gebildete Rückstellung übersteigen. Es kann nicht ausgeschlossen werden, dass ein für Siemens nachteiliger Ausgang einer Rechtsstreitigkeit, eines regulatorischen Verfahrens oder einer behördlichen Untersuchung dazu führen wird, dass Siemens zusätzlich zu der ge-

bildeten Rückstellung weitere Aufwendungen entstehen, die eine wesentliche Wirkung auf die Vermögens-, Finanz- und Ertragslage des Unternehmens haben können (siehe »Ziffer 30« für weitere Informationen über Rechtsstreitigkeiten).

**Ertragsteuern** – Siemens ist in zahlreichen Steuerjurisdiktionen tätig. Die im Abschluss dargestellten Steuerpositionen werden unter Berücksichtigung der jeweiligen Steuergesetze sowie der einschlägigen Verwaltungsauffassungen ermittelt und unterliegen wegen ihrer Komplexität möglicherweise einer abweichenden Interpretation durch Steuerpflichtige einerseits und lokale Finanzbehörden andererseits. Aktive Latente Steuern werden angesetzt, wenn künftig ausreichend steuerpflichtiges Einkommen zur Verfügung steht. Dabei werden unter anderem die geplanten Ergebnisse aus der operativen Geschäftstätigkeit, die Ergebniswirkungen aus der Umkehrung von zu versteuernden temporären Differenzen sowie mögliche Steuerstrategien mit einbezogen. Auf Basis des geplanten steuerpflichtigen Einkommens künftiger Geschäftsjahre erfolgt zu jedem Bilanzstichtag die Beurteilung der Werthaltigkeit von aktiven Latenten Steuern durch die Unternehmensleitung. Da künftige Geschäftsentwicklungen unsicher sind und sich teilweise der Steuerung durch die Unternehmensleitung entziehen, sind Annahmen zur Schätzung von künftigem steuerpflichtigem Einkommen sowie über den Zeitpunkt der Realisierung von aktiven Latenten Steuern erforderlich. Schätzgrößen werden im jeweiligen Geschäftsjahr angepasst, wenn ausreichende Hinweise für eine Anpassung vorliegen. Sofern die Unternehmensleitung von einer teilweisen oder vollständigen Nichtrealisierung von aktiven Latenten Steuern ausgeht, erfolgt die Vornahme einer Wertberichtigung in entsprechender Höhe.

## 4 – Akquisitionen, Verkäufe und nicht fortgeführte Aktivitäten

### a) Akquisitionen

In den Geschäftsjahren 2010 und 2009 tätigte die Gesellschaft eine Reihe von Akquisitionen. Diese Akquisitionen wurden ab dem Erwerbsstichtag nach der Erwerbsmethode im Konzernabschluss der Gesellschaft konsolidiert.

#### aa) Akquisitionen im Geschäftsjahr 2010

Anfang November 2009 hat Siemens 100 % an Solel Solar Systems Ltd., Beit Shemesh/Israel (Solel), im Rahmen eines Share Deals übernommen. Das Solartechnikunternehmen Solel ist ein Anbieter von Komponenten und Lösungen für solar-

thermische Kraftwerke und konzentriert sich auf den Markt für »Concentrated Solar Power« (CSP). Solel entwickelt, plant, fertigt und installiert Anlagen für solarthermische Kraftwerke. Darüber hinaus entwickelt Solel auch das solarthermische Kraftwerk Lebrija 1 (50 MW) in Spanien (Lebrija 1). Mit der Akquisition von Solel erweitert Siemens sein Produktportfolio im Bereich CSP, um eine führende Stellung als Anbieter von CSP-Komponenten und -Lösungen zu erlangen. Solel wird seit November 2009 konsolidiert und wurde in die Division Renewable Energy des Sektors Energy integriert. Der gesamte Kaufpreis belief sich auf rund 279 EUR (einschließlich 14 EUR übernommener Zahlungsmittel). Die Gesellschaft hat die Kaufpreisallokation im vierten Quartal des Geschäftsjahrs 2010 fortgesetzt, aber noch nicht endgültig abgeschlossen. Daher sind die erfassten Beträge hinsichtlich der Bewertung der übernommenen Vermögenswerte und Schulden vorläufig. Ausgehend von der vorläufigen Kaufpreisallokation wurden rund 56 EUR den Immateriellen Vermögenswerten zugeordnet, die der Abschreibung unterliegen, und rund 194 EUR wurden als Geschäfts- und Firmenwert ausgewiesen. Von den 56 EUR an Immateriellen Vermögenswerten beziehen sich 35 EUR auf patentierte und unpatentierte Technologie mit einer gewichteten durchschnittlichen Nutzungsdauer von sechseinhalb Jahren, 14 EUR auf Auftragsbestand mit einer gewichteten durchschnittlichen Nutzungsdauer von einem Jahr sowie 7 EUR auf laufende Forschungs- und Entwicklungsprojekte und Markennamen mit einer gewichteten durchschnittlichen Nutzungsdauer von vier Jahren. Solel trug 92 EUR Umsatzerlöse und einen Nettoverlust von 53 EUR (inklusive Kaufpreisallokationseffekte und Integrationskosten) zum Konzernabschluss für den Zeitraum von der Akquisition bis zum 30. September 2010 bei. Wäre die Akquisition zum 1. Oktober 2009 erfolgt, hätte Solel einen Beitrag von 109 EUR und – 52 EUR zu den Konzernumsätzen beziehungsweise zum Konzernergebnis für die zwölf Monate bis zum 30. September 2010 geleistet.

Im Geschäftsjahr 2010 erwarb Siemens verschiedene weitere Gesellschaften, die weder einzeln noch in Summe wesentlich sind.

#### ab) Akquisitionen im Geschäftsjahr 2009

Im Geschäftsjahr 2009 erwarb Siemens verschiedene Gesellschaften, die weder einzeln noch in Summe wesentlich sind.

### b) Verkäufe und nicht fortgeführte Aktivitäten

**ba) Verkäufe, die nicht als nicht fortgeführte Aktivitäten qualifizieren: abgeschlossene Transaktionen**

### **Verkäufe im Geschäftsjahr 2010**

Ende Dezember 2009 verkaufte Siemens den 25%-Minderheitsanteil an der Dräger Medical AG & Co. KG an den Mehrheitsaktionär Drägerwerk AG & Co. KGaA. Die Beteiligung wurde im Sektor Healthcare nach der Equity-Methode bilanziert. Der Verkaufserlös enthält eine Bar-, eine Verkäuferdarlehens- und eine Optionskomponente, die von der Aktienkursentwicklung der Drägerwerk AG & Co. KGaA abhängt.

Hinsichtlich des Verkaufs des Flugfeldbefeuerungsgeschäfts des Sektors Industry und des Verkaufs der Roke-Manor-Aktivitäten in Großbritannien siehe »Ziffer 6«. Zum Verkauf der UBS Real Estate Kapitalanlagegesellschaft mbH siehe »Ziffer 9«.

### **Verkäufe im Geschäftsjahr 2009**

Der Verkauf von Immobilien der Siemens Wohnungsgesellschaft wurde im dritten Quartal des Geschäftsjahrs 2009 abgeschlossen (siehe »Ziffer 6«).

Anfang Oktober 2008 beendete Siemens die Übertragung eines Anteils von 80,2% an Siemens Home and Office Communication Devices GmbH & Co. KG (SHC) an die ARQUES Industries AG. Das Geschäft wurde unter den *Zentral gesteuerten Portfolioaktivitäten* berichtet. Die Transaktion führte zu einem vorläufigen Nettoverlust in Höhe von 108 EUR (einschließlich einer Wertberichtigung in Höhe von 78 EUR). Die Aufwendungen wurden überwiegend bereits im Geschäftsjahr 2008 erfasst.

Anfang November 2008 unterzeichnete Siemens ein Abkommen, seinen 50%-Anteil an Fujitsu Siemens Computers (Holding) B.V. (FSC), der im Segment Equity Investments dargestellt wurde, an Fujitsu Limited zu verkaufen. Die Transaktion wurde Anfang April 2009 abgeschlossen. Daraus ergab sich ein Gewinn in Höhe von 327 EUR (vor Steuern) nach Abzug von verkaufsbezogenen Aufwendungen. Der Gewinn ist in *Sonstige betriebliche Erträge* enthalten.

### **bb) Verkäufe, die nicht als nicht fortgeführte Aktivitäten qualifizieren: zur Veräußerung bestimmt**

Die Konzernbilanz zum 30. September 2010 und 2009 enthält 715 EUR und 517 EUR Vermögenswerte sowie 146 EUR und 157 EUR Verbindlichkeiten, die zur Veräußerung bestimmt sind. Zum 30. September 2010 beziehen sich diese im Wesentlichen auf Electronics Assembly Systems (EA), das von den Zentral gesteuerten Portfolioaktivitäten gehalten wird, und Areva NP S.A.S., das vom Sektor Energy gehalten wird. Für EA

wird der Abschluss der Transaktion im zweiten Quartal des Geschäftsjahrs 2011 erwartet. Im Januar 2009 gab Siemens bekannt, die Gesellschaftervereinbarung für das Joint Venture Areva NP S.A.S. zu kündigen und im Rahmen einer Put-Vereinbarung den von Siemens gehaltenen Minderheitsanteil von 34% an Areva NP S.A.S. an den Mehrheitseigner Areva S.A. zu veräußern. Der Buchwert der Beteiligung an Areva NP S.A.S. beträgt 190 EUR. Die benötigten kartellrechtlichen Genehmigungen wurden im Oktober 2009 erteilt. Die Gesellschaft erwartet den Eingang eines Bewertungsgutachtens zu Areva NP S.A.S. im Kalenderjahr 2010 – eine notwendige Voraussetzung zum Abschluss der Transaktion. Die Hauptgruppen der Aktiva und Passiva, die als zur Veräußerung bestimmt klassifiziert sind, betreffen den Buchwert der 34%-Beteiligung an Areva NP S.A.S. sowie die operativen Vermögenswerte und Verbindlichkeiten von EA.

### **bc) Nicht fortgeführte Aktivitäten Ehemaliges Segment Communications (Com) – nicht fortgeführte Aktivitäten**

Die Ergebnisse des ehemaligen operativen Segments Com weist Siemens mit Ausnahme der Geschäftsaktivitäten, die Bestandteil von *Zentral gesteuerte Portfolioaktivitäten* wurden, rückwirkend in der Konzern-Gewinn- und Verlustrechnung in allen dargestellten Berichtszeiträumen als nicht fortgeführte Aktivitäten aus. Die Com-Aktivitäten beinhalteten ehemals das Mobile-Devices-(MD)-Geschäft, das im Geschäftsjahr 2005 veräußert wurde, das Carrier-Geschäft, das im April 2007 in die Nokia Siemens Networks B.V., Niederlande (NSN), eingebracht wurde, sowie das Siemens-Enterprise-Communications-Geschäft (SEN), das zum 30. September 2008 zu 51% verkauft wurde.

Im April 2007 haben Siemens seine Carrier-Aktivitäten und Nokia Corporation (Nokia), Finnland, seine Networks Business Group in NSN eingebracht. Sowohl Siemens als auch Nokia erhielten im Gegenzug einen wirtschaftlichen Anteil an NSN von jeweils circa 50%.

Siemens hat die Möglichkeit, wesentlichen Einfluss auf die Geschäfts- und Finanzpolitik von NSN auszuüben. Seit April 2007 berichtet Siemens seinen Eigenkapitalanteil an NSN in *Nach der Equity-Methode bilanzierte Beteiligungen* (siehe »Ziffer 19«) und seinen Ergebnisanteil an NSN im *Ergebnis aus nach der Equity-Methode bilanzierte Beteiligungen* (siehe »Ziffer 8«).

Ende September 2008 verkaufte Siemens einen 51%-Anteil von SEN an The Gores Group, ein US-amerikanisches Finanzunternehmen mit Managementexpertise. The Gores Group brachte zwei Firmen in die niederländische Enterprise Networks Holdings B.V. (EN) ein, die das Geschäft von SEN ergänzen. Aus der Transaktion resultierte ein Post-Closing-Gewinn in Höhe von 36 EUR (vor Steuern) im Geschäftsjahr 2010 und 117 EUR im Geschäftsjahr 2009, enthalten in den nicht fortgeführten Aktivitäten. Die Ergebnisse von SEN, einschließlich der Anpassungen der ehemaligen Com-Aktivitäten, werden in der Konzern-Gewinn- und Verlustrechnung rückwirkend für alle berichteten Perioden als nicht fortgeführte Aktivitäten dargestellt.

Siemens hat die Möglichkeit, wesentlichen Einfluss auf die Geschäfts- und Finanzpolitik von EN auszuüben. Seit dem 30. September 2008 berichtet Siemens seinen Eigenkapitalanteil an EN in *Nach der Equity-Methode bilanzierte Beteiligungen* (siehe »Ziffer 19«) und seinen Ergebnisanteil an EN im *Ergebnis aus nach der Equity-Methode bilanzierte Beteiligungen* (siehe »Ziffer 8«).

Die Nettoergebnisse aus Com, die in der Konzern-Gewinn- und Verlustrechnung als nicht fortgeführte Aktivitäten ausgewiesen werden, stellen sich wie folgt dar:

|                                                                                                                                     | Geschäftsjahr |           |
|-------------------------------------------------------------------------------------------------------------------------------------|---------------|-----------|
|                                                                                                                                     | 2010          | 2009      |
| Umsatz                                                                                                                              | 2             | 15        |
| Kosten und Aufwendungen                                                                                                             | - 92          | - 47      |
| Gewinn/Verlust aus der Einbringung der Carrier-Aktivitäten in NSN                                                                   | -             | 9         |
| Gewinn/Verlust aus der Veräußerung von SEN                                                                                          | 36            | 117       |
| <b>Gewinn/Verlust aus nicht fortgeführten Aktivitäten vor Ertragsteuern</b>                                                         | <b>- 54</b>   | <b>94</b> |
| Ertragsteuern der gewöhnlichen Geschäftstätigkeit einschließlich der Bewertung zum beizulegenden Zeitwert, abzüglich Verkaufskosten | 22            | - 34      |
| Ertragsteuern aus dem Gewinn/Verlust der Einbringung des Carrier-Geschäfts in NSN                                                   | -             | - 4       |
| Ertragsteuern aus dem Gewinn/Verlust der Einbringung des Siemens-Enterprise-Geschäfts in EN                                         | - 11          | - 19      |
| <b>Gewinn/Verlust aus nicht fortgeführten Aktivitäten (nach Steuern)</b>                                                            | <b>- 43</b>   | <b>37</b> |

Die in der Konzern-Gewinn- und Verlustrechnung für die Geschäftsjahre 2010 und 2009 dargestellten Nettoergebnisse aus nicht fortgeführten Aktivitäten beziehen sich im Wesentlichen auf rechtliche Angelegenheiten und die Ausgliederung in Zusammenhang mit den ehemaligen Com-Aktivitäten. Im Geschäftsjahr 2009 beziehen sie sich auch auf einen Verlust aus dem Verkauf des SEN-Geschäfts. Dieser Verlust wurde durch einen positiven Effekt von 154 EUR aus der Einigung zwischen Siemens und The Gores Group kompensiert, der sich auf offene Forderungen bezüglich einer Kaufpreisanpassung und weitere beiderseitige Verpflichtungen in Zusammenhang mit dem Verkauf des SEN-Geschäfts bezieht.

Die Einigung zwischen Siemens und The Gores Group im Geschäftsjahr 2009 unterliegt nur der deutschen Körperschaftsteuer.

## 5 – Restrukturierungsaufwendungen

Siemens hat unterschiedliche Restrukturierungsmaßnahmen begonnen und wird diese weiter umsetzen. Im Geschäftsjahr 2010 fielen zum Beispiel im Sektor Industry personalbezogene Aufwendungen von 200 EUR für mehrere Restrukturierungsprojekte des Sektors an.

Wie angekündigt, wurde im Geschäftsjahr 2010 ein Restrukturierungsprojekt zur strategischen Neuausrichtung von Siemens IT Solutions and Services gestartet. Es zielt darauf ab, die IT-Sparte wettbewerbsfähig aufzustellen, indem die Belegschaft weltweit um 4.200 Arbeitsplätze reduziert wird. Diesbezügliche Maßnahmen umfassen im Wesentlichen Abfindungsvereinbarungen mit und ohne Weiterbeschäftigung in Transfergesellschaften sowie Altersteilzeitverträge. Bewertungsannahmen betreffen überwiegend die individuelle Verweildauer in den Transfergesellschaften. Im Geschäftsjahr 2010 beinhalteten die Restrukturierungskosten Aufwendungen für Leistungen aus Anlass der Beendigung von Arbeitsverhältnissen von 399 EUR, die unter Siemens IT Solutions and Services ausgewiesen wurden.

Das im Geschäftsjahr 2008 begonnene SG&A-Programm zielte auf eine Reduzierung der Vertriebs- und allgemeinen Verwaltungskosten (SG&A-Kosten) um circa 1,2 Mrd. EUR im Geschäftsjahr 2010 ab. Im Geschäftsjahr 2009 fielen in den Zentralen Posten zentral gebuchte Nettoaufwendungen in Höhe von 235 EUR aus dem SG&A-Programm an, die Leistungen aus Anlass der Beendigung von Arbeitsverhältnissen in Höhe von

337 EUR im Rahmen des SG&A-Programms und sonstiger andauernder personalbezogener Restrukturierungsmaßnahmen beinhalten. Außerdem ist darin ein Ertrag in Höhe von 102 EUR aus der Auflösung von Verbindlichkeiten für Leistungen aus Anlass der Beendigung von Arbeitsverhältnissen für den deutschen Teil des SG&A-Programms sowie damit verbundener Programme berücksichtigt, die in der Konzernbilanz zum 30. September 2008 gebildet wurden. Die Auflösung ergab sich aufgrund geänderter Schätzungen hinsichtlich der in Anspruch genommenen Maßnahmen des Programms, das heißt, einer stärkeren Nutzung von Vereinbarungen zur Altersteilzeit im Vergleich zu Abfindungsvereinbarungen in Verbindung mit Transfergesellschaften. Leistungen aus Anlass der Beendigung von Arbeitsverhältnissen in Zusammenhang mit dem SG&A-Programm werden in den *Zentralen Posten und Pensionen* ausgewiesen.

Restrukturierungsaufwendungen sind im *Gewinn/Verlust aus fortgeführten Aktivitäten vor Ertragsteuern* enthalten. *Sonstige kurzfristige Verbindlichkeiten* enthalten den überwiegenden Teil an Leistungen aus Anlass der Beendigung von Arbeitsverhältnissen.

## 6 – Sonstige betriebliche Erträge

|                                                                               | Geschäftsjahr |              |
|-------------------------------------------------------------------------------|---------------|--------------|
|                                                                               | 2010          | 2009         |
| Gewinne aus der Veräußerung von Geschäftseinheiten                            | 134           | 409          |
| Gewinne aus der Veräußerung von Sachanlagen und immateriellen Vermögenswerten | 287           | 356          |
| Sonstiges                                                                     | 435           | 300          |
|                                                                               | <b>856</b>    | <b>1.065</b> |

*Gewinne aus der Veräußerung von Geschäftseinheiten* im Geschäftsjahr 2010 beinhalten einen Gewinn in Höhe von 47 EUR in Zusammenhang mit dem Verkauf des Flugfeldbefeuerungs geschäfts des Sektors Industry und 35 EUR aus dem Verkauf unserer Roke-Manor-Aktivitäten in Großbritannien, die zentral gehalten wurden. *Gewinne aus der Veräußerung von Geschäftseinheiten* im Geschäftsjahr 2009 beinhalten 327 EUR aus dem Verkauf der Siemens-Beteiligung an FSC, die im Segment Equity Investment ausgewiesen wurde. Für weitere Informationen siehe »Ziffer 4, *Akquisitionen, Verkäufe und nicht fortgeführte Aktivitäten*«.

Immobilien, die wir nach einer Verkaufs- und Rückmiettransaktion in einer früheren Berichtsperiode als Leasingnehmer eines Finanzierungsleasingvertrags ausgewiesen hatten, wurden vom Leasinggeber (vom Siemens Pension-Trust e.V. kontrollierte Gesellschaften) im Geschäftsjahr 2010 verkauft. Dies führte zur Auflösung unserer Verbindlichkeit aus einem anhaltenden Leasing-Engagement (*Continuing Involvement*) in Höhe von 191 EUR (zahlungsunwirksame Transaktion), zur Ausbuchung der Immobilien mit einem Buchwert in Höhe von 122 EUR und zu einem Gewinn in Höhe von 69 EUR, der in *Gewinne aus der Veräußerung von Sachanlagen und immateriellen Vermögenswerten* berichtet wird. In Zusammenhang mit dem neuen Immobilien-Operating-Leasingvertrag, der im zweiten Quartal des Geschäftsjahrs 2010 abgeschlossen wurde, erhielt Siemens Mietzuschüsse in Höhe von 43 EUR, die abgegrenzt wurden und über die Laufzeit des neuen Leasingvertrags ertragswirksam amortisiert werden. *Gewinne aus der Veräußerung von Sachanlagen und immateriellen Vermögenswerten* im Geschäftsjahr 2010 beinhalten darüber hinaus einen Gewinn in Höhe von 74 EUR aus dem Verkauf verschiedener Immobilien in Zug, Schweiz. *Gewinne aus der Veräußerung von Sachanlagen und immateriellen Vermögenswerten* im Geschäftsjahr 2009 beinhalten einen Vorsteuergewinn nach Abzug von verkaufsbezogenen Aufwendungen in Höhe von 224 EUR aus der Veräußerung des Siemens-Wohnungsbestands. Die Veräußerung wird unter Siemens Real Estate ausgewiesen.

*Sonstiges* beinhaltet im Geschäftsjahr 2010 Erträge aus der Einigung mit ehemaligen Vorstands- und Aufsichtsratsmitgliedern in Verbindung mit rechtlichen und regulatorischen Themen, größtenteils aus der D&O-Versicherung in Höhe von 84 EUR sowie in Verbindung mit der Rückführung von durch die Behörden arrestierten Beträgen in Höhe von 40 EUR. Für weitere Informationen zu den rechtlichen und regulatorischen Themen, die in *Sonstiges* in den Geschäftsjahren 2010 und 2009 enthalten sind, siehe »Ziffer 30«. Im dritten Quartal des Geschäftsjahrs 2010 hat das Unternehmen aufgrund des Verlusts des beherrschenden Einflusses eine vormals voll konsolidierte Gesellschaft nun nach der Equity-Methode einbezogen. Aus dem Verlust des beherrschenden Einflusses resultierte ein Gewinn in Höhe von 40 EUR, der vor allem auf die Ausbuchung einer von der Beteiligungsgesellschaft gehaltenen derivativen Finanzverpflichtung zurückzuführen ist. *Sonstiges* im Geschäftsjahr 2009 beinhaltet Erträge in Zusammenhang mit rechtlichen und regulatorischen Themen.

## 7 – Sonstige betriebliche Aufwendungen

|                                                                                | Geschäftsjahr  |              |
|--------------------------------------------------------------------------------|----------------|--------------|
|                                                                                | 2010           | 2009         |
| Wertminderungen von Geschäfts- und Firmenwerten (siehe »Ziffer 16«)            | - 1.145        | - 32         |
| Verluste aus der Veräußerung von Geschäftseinheiten                            | - 117          | - 68         |
| Verluste aus der Veräußerung von Sachanlagen und immateriellen Vermögenswerten | - 48           | - 83         |
| Sonstiges                                                                      | - 301          | - 449        |
|                                                                                | <b>- 1.611</b> | <b>- 632</b> |

*Wertminderungen von Geschäfts- und Firmenwerten* beziehen sich im Geschäftsjahr 2010 auf die Division Diagnostics des Sektors Healthcare. Für weitere Informationen siehe »Ziffer 16«.

*Verluste aus der Veräußerung von Geschäftseinheiten* im Geschäftsjahr 2010 beinhalten eine Vorsorge von 106 EUR in Verbindung mit dem angekündigten Verkauf des Electronics-Assembly-Systems-Geschäfts, das in den *Zentral gesteuerten Portfolioaktivitäten* enthalten ist.

*Sonstiges* enthält im Geschäftsjahr 2009 Aufwendungen für externe Berater in Höhe von 95 EUR, die Siemens in Zusammenhang mit den Untersuchungen mutmaßlicher Verstöße gegen Antikorruptionsgesetze und ähnlicher Angelegenheiten sowie Maßnahmen zur Beseitigung von Schwächen des internen Kontrollsystems beauftragt hat, sowie Aufwendungen in Höhe von 53 EUR aus einer Einigung mit der Weltbankgruppe (zu weiteren Informationen hierzu siehe »Ziffer 30, Rechtsstreitigkeiten«).

## 8 – Ergebnis aus nach der Equity-Methode bilanzierten Beteiligungen

|                                                   | Geschäftsjahr |                |
|---------------------------------------------------|---------------|----------------|
|                                                   | 2010          | 2009           |
| Anteiliges Ergebnis aus der Equity-Konsolidierung | - 9           | - 392          |
| Ergebnis aus Veräußerungen                        | 9             | 5              |
| Wertminderungen                                   | - 40          | - 1.644        |
| Wertaufholungen                                   | -             | 85             |
|                                                   | <b>- 40</b>   | <b>- 1.946</b> |

*Anteiliges Ergebnis aus der Equity-Konsolidierung* beinhaltet im Geschäftsjahr 2010 minus 533 (im Vj. minus 543) EUR aus unserer Beteiligung an NSN, 5 (im Vj. minus 171) EUR aus unserer Beteiligung an EN sowie insgesamt 277 (im Vj. 195) EUR aus unseren beiden Beteiligungen an BSH Bosch und Siemens Hausgeräte GmbH (BSH) und Krauss-Maffei Wegmann GmbH & Co. KG (KMW). Für weitere Informationen hierzu siehe »Ziffer 4« sowie »Ziffer 19«.

Beteiligungen an assoziierten Unternehmen und an Gemeinschaftsunternehmen werden dann auf Wertminderungen überprüft, wenn es Hinweise auf eine Wertminderung der Beteiligung gibt. Im vierten Quartal des Geschäftsjahrs 2009 wurde NSN, das im Segment Equity Investments berichtet wird, auf Wertminderung überprüft. Die Überprüfung wurde im Wesentlichen durch den Verlust von Marktanteilen von NSN sowie durch einen Rückgang im Produktgeschäft von NSN ausgelöst. Diese Sachverhalte führten bei NSN zu einer wesentlichen Anpassung künftig zu erwartender Zahlungsmittelzuflüsse. Die Prüfung auf Wertminderung wurde auf Basis des beizulegenden Zeitwerts, abzüglich Verkaufskosten, unter Anwendung von diskontierten Zahlungsströmen (*Discounted Cash Flows*), durchgeführt. Hieraus ergab sich ein Wertminderungsaufwand in Höhe von 1.634 EUR, der im *Ergebnis aus nach der Equity-Methode bilanzierten Beteiligungen* erfasst wurde. Der gewichtete Kapitalkostensatz (*Weighted Average Cost of Capital – WACC*) und die bei der Endwertermittlung unterstellte langfristige Wachstumsrate waren die verwendeten Basisannahmen für die Berechnung des beizulegenden Zeitwerts zur Bestimmung der Wertminderung auf den Beteiligungsbuchwert von NSN. Dabei wurden ein Nachsteuer-WACC von 9 % und die bei der Endwertermittlung unterstellte langfristige Wachstumsrate von 1 % verwendet. Wir



glauben, dass unsere Annahmen grundsätzlich konsistent mit den aktuellen Markteinschätzungen der Risiken bei NSN waren sowie makroökonomische und industriespezifische Trends berücksichtigten.

Wertaufholungen im Geschäftsjahr 2009 in Höhe von 51 EUR beziehen sich auf eine durch SFS gehaltene Beteiligung, worauf in einer früheren Berichtsperiode eine Wertminderung erfasst wurde, infolge unserer Erwartung auf verbesserte zukünftige mit dieser Beteiligung realisierbare Ergebnisse.

Für weitere Informationen zu den für die Gesellschaft bedeutendsten nach der Equity-Methode bilanzierten Beteiligungen siehe »Ziffer 19«.

## 9 – Zinsertrag, Zinsaufwand und sonstiges Finanzergebnis

|                                                                       | Geschäftsjahr  |                |
|-----------------------------------------------------------------------|----------------|----------------|
|                                                                       | 2010           | 2009           |
| Pensionsbezogener Zinsertrag                                          | 1.396          | 1.303          |
| Zinsertrag, nicht pensionsbezogen                                     | 765            | 833            |
| <b>Zinsertrag</b>                                                     | <b>2.161</b>   | <b>2.136</b>   |
| Pensionsbezogener Zinsaufwand                                         | - 1.461        | - 1.530        |
| Zinsaufwand, nicht pensionsbezogen                                    | - 429          | - 683          |
| <b>Zinsaufwand</b>                                                    | <b>- 1.890</b> | <b>- 2.213</b> |
| Ergebnis aus Zur Veräußerung verfügbaren finanziellen Vermögenswerten | 44             | - 12           |
| Übriges Finanzergebnis                                                | - 380          | - 421          |
| <b>Sonstiges Finanzergebnis</b>                                       | <b>- 336</b>   | <b>- 433</b>   |

Die Bestandteile des Ergebnisses aus **Pensionen und ähnlichen Verpflichtungen** stellen sich wie folgt dar:

|                                                             | Geschäftsjahr |              |
|-------------------------------------------------------------|---------------|--------------|
|                                                             | 2010          | 2009         |
| Erwartete Rendite des Fondsvermögens                        | 1.396         | 1.303        |
| Zinsaufwand                                                 | - 1.461       | - 1.530      |
| <b>Ergebnis aus Pensionen und ähnlichen Verpflichtungen</b> | <b>- 65</b>   | <b>- 227</b> |

Die Gesamtbeträge der **Zinserträge und Zinsaufwendungen, nicht pensionsbezogen** stellen sich wie folgt dar:

|                                             | Geschäftsjahr |            |
|---------------------------------------------|---------------|------------|
|                                             | 2010          | 2009       |
| Zinsertrag, nicht pensionsbezogen           | 765           | 833        |
| Zinsaufwand, nicht pensionsbezogen          | - 429         | - 683      |
| <b>Zinsergebnis, nicht pensionsbezogen</b>  | <b>336</b>    | <b>150</b> |
| davon: Zinsergebnis aus operativem Geschäft | 19            | 39         |
| davon: Übriges Zinsergebnis                 | 317           | 111        |

Das *Zinsergebnis aus operativem Geschäft* enthält vor allem Zinserträge und Zinsaufwendungen aus Kundenforderungen beziehungsweise Lieferantenverbindlichkeiten sowie Zinsen auf Anzahlungen und Vorfinanzierungen von Kundenaufträgen. Das *Übrige Zinsergebnis* umfasst alle anderen Zinsen, im Wesentlichen den Zinsaufwand aus Konzernschulden, Zinsen von mit diesen in Zusammenhang stehenden Sicherungsgeschäften und Zinserträge aus Konzernvermögenswerten.

Das *Zinsergebnis, nicht pensionsbezogen* beinhaltet die folgenden Ergebnisse aus finanziellen Vermögenswerten (finanziellen Verbindlichkeiten), die nicht erfolgswirksam zum beizulegenden Zeitwert bewertet werden.

|                                                            | Geschäftsjahr |       |
|------------------------------------------------------------|---------------|-------|
|                                                            | 2010          | 2009  |
| Zinsertrag auf finanzielle Vermögenswerte                  | 749           | 804   |
| Zinsaufwand auf finanzielle Verbindlichkeiten <sup>1</sup> | - 1.002       | - 994 |

<sup>1</sup> Hierin ist bei gesicherten Positionen ausschließlich der Zinsaufwand auf das nicht erfolgswirksam zum beizulegenden Zeitwert bilanzierte Grundgeschäft enthalten, wohingegen im *Zinsaufwand, nicht pensionsbezogen* auch der gegenläufige Zinseffekt aus dem Sicherungsinstrument wirkt. Der Unterschied ist im Wesentlichen auf die in »Ziffer 32« unter *Fair Value Hedges für festverzinsliche Finanzschulden* beschriebenen Swap-Kontrakte zurückzuführen.

Das Ergebnis aus zur Veräußerung verfügbaren finanziellen Vermögenswerten stellt sich wie folgt dar:

|                                                                              | Geschäftsjahr |             |
|------------------------------------------------------------------------------|---------------|-------------|
|                                                                              | 2010          | 2009        |
| Erhaltene Dividenden                                                         | 24            | 29          |
| Gewinne aus Veräußerungen                                                    | 64            | 16          |
| Wertminderungen                                                              | - 48          | - 59        |
| Sonstiges                                                                    | 4             | 2           |
| <b>Ergebnis aus zur Veräußerung verfügbaren finanziellen Vermögenswerten</b> | <b>44</b>     | <b>- 12</b> |

Gewinne aus Veräußerungen im Geschäftsjahr 2010 beinhaltet einen Gewinn in Höhe von 47 EUR aus dem Verkauf der UBS Real Estate Kapitalanlagegesellschaft mbH.

Übriges Finanzergebnis im Geschäftsjahr 2010 und 2009 beinhaltet Aufwendungen in Höhe von 313 (im Vj. 200) EUR als Ergebnis der Aufzinsung von Rückstellungen und der Absenkung des Abzinsungssatzes für Rückstellungen sowie Nettoaufwendungen aus Wertberichtigungen und Abschreibungen auf Finanzforderungen, nach Abzug von Zuschreibungen, in Höhe von 63 (im Vj. 162) EUR. Es beinhaltet auch Gewinne und Verluste in Zusammenhang mit derivativen Finanzinstrumenten.

## 10 – Ertragsteuern

Für die Geschäftsjahre 2010 und 2009 verteilt sich der Gewinn/Verlust aus fortgeführten Aktivitäten vor Ertragsteuern auf Inland und Ausland wie folgt:

|             | Geschäftsjahr |              |
|-------------|---------------|--------------|
|             | 2010          | 2009         |
| Deutschland | 1.891         | 1.525        |
| Ausland     | 3.920         | 2.366        |
|             | <b>5.811</b>  | <b>3.891</b> |

Der Ertragsteueraufwand/-ertrag setzt sich wie folgt zusammen:

|                                                    | Geschäftsjahr |              |
|----------------------------------------------------|---------------|--------------|
|                                                    | 2010          | 2009         |
| Laufende Steuern:                                  |               |              |
| Körperschaftsteuer und Gewerbesteuer (Deutschland) | 31            | 269          |
| Ausländische Ertragsteuern                         | 1.564         | 1.209        |
|                                                    | 1.595         | 1.478        |
| Latente Steuern:                                   |               |              |
| Deutschland                                        | 445           | 1            |
| Ausland                                            | - 341         | - 45         |
|                                                    | 104           | - 44         |
| <b>Ertragsteueraufwand</b>                         | <b>1.699</b>  | <b>1.434</b> |

In den laufenden Steuern des Geschäftsjahrs 2010 ist ein Ertrag von 234 (im Vj. 11) EUR für laufende Steuern früherer Geschäftsjahre enthalten. Die Reduzierung des laufenden Steueraufwands in Deutschland ist beeinflusst durch die Auflösung einer Steuerverbindlichkeit aufgrund eines erfolgreichen Einspruchs in Zusammenhang mit nicht abzugsfähigen Betriebsausgaben ausländischer Dividenden.

Die latenten Steuern des Geschäftsjahrs 2010 beinhalten einen latenten Steuerertrag von 199 (im Vj. 177) EUR in Zusammenhang mit der Entwicklung der temporären Unterschiede.

Für die Ermittlung der laufenden Steuern in Deutschland werden auf ausgeschüttete und einbehaltene Gewinne ein einheitlicher Körperschaftsteuersatz von 15% und darauf ein Solidaritätszuschlag von 5,5% zugrunde gelegt. Zusätzlich zur Körperschaftsteuer wird für in Deutschland erzielte Gewinne Gewerbesteuer erhoben. Unter Berücksichtigung der Nichtabzugsfähigkeit der Gewerbesteuer als Betriebsausgabe ergibt sich für die Gewerbesteuer ein durchschnittlicher Steuersatz von 15%, sodass hieraus ein inländischer Gesamtsteuersatz von 31% resultiert. Für die Berechnung der latenten Steueransprüche und -verbindlichkeiten werden die Steuersätze zugrunde gelegt, die im Zeitpunkt der Realisierung des Vermögenswerts beziehungsweise der Erfüllung der Schuld gültig sind.

Der von ausländischen Tochterunternehmen erwirtschaftete Gewinn wird auf der Grundlage des jeweiligen nationalen Steuerrechts ermittelt und mit dem im Sitzland maßgeblichen Steuersatz versteuert. Latente Steueransprüche und -verbindlichkeiten werden mit den Steuersätzen bewertet, die im Zeitpunkt der Realisierung des Vermögenswerts beziehungsweise der Erfüllung der Schuld gültig sind.

Nachfolgend wird die Überleitung vom erwarteten Ertragsteueraufwand auf den ausgewiesenen Ertragsteueraufwand gezeigt. Die Berechnung des erwarteten Ertragsteueraufwands basiert auf der Anwendung des deutschen Gesamtsteuersatzes von 31%.

|                                                                                     | Geschäftsjahr |              |
|-------------------------------------------------------------------------------------|---------------|--------------|
|                                                                                     | 2010          | 2009         |
| Erwarteter Ertragsteueraufwand                                                      | 1.801         | 1.206        |
| Erhöhung/Minderung der Ertragsteuerbelastung durch:                                 |               |              |
| Nicht abzugsfähige Betriebsausgaben                                                 | 691           | 715          |
| Steuerfreie Erträge                                                                 | - 305         | - 421        |
| Steuern für Vorjahre                                                                | - 256         | - 76         |
| Veränderung in der Realisierbarkeit latenter Steueransprüche und Steuergutschriften | - 37          | 25           |
| Effekt Steuersatzänderung                                                           | 11            | - 17         |
| Steuersatzunterschiede Ausland                                                      | - 213         | - 116        |
| Steuereffekt von nach der Equity-Methode bilanzierten Beteiligungen                 | 2             | 121          |
| Sonstiges, netto                                                                    | 5             | - 3          |
| <b>Ausgewiesener Ertragsteueraufwand</b>                                            | <b>1.699</b>  | <b>1.434</b> |

Die Erhöhung der Ertragsteuern wegen nicht abziehbarer Betriebsausgaben ist im Geschäftsjahr 2010 im Wesentlichen zurückzuführen auf die Abschreibung des Geschäfts- und Firmenwerts der Division Diagnostics des Sektors Healthcare, der nur teilweise steuerlich abzugsfähig ist. Im Geschäftsjahr 2009 ist die Abschreibung wegen Wertminderung von NSN enthalten.

Die aktiven und passiven Latenten Steuern (brutto) verteilen sich auf folgende Bilanzpositionen:

|                                         | 30. September |              |
|-----------------------------------------|---------------|--------------|
|                                         | 2010          | 2009         |
| <b>Vermögenswerte:</b>                  |               |              |
| Finanzielle Vermögenswerte              | 12            | 66           |
| Sonstige Immaterielle Vermögenswerte    | 297           | 117          |
| Sachanlagen                             | 305           | 337          |
| Vorräte                                 | 528           | 428          |
| Forderungen                             | 994           | 518          |
| Pensionen und ähnliche Verpflichtungen  | 2.674         | 1.892        |
| Rückstellungen                          | 1.835         | 1.515        |
| Verbindlichkeiten                       | 2.645         | 1.848        |
| Verlustvorräte und Steuergutschriften   | 1.971         | 2.455        |
| Sonstiges                               | 312           | 209          |
| <b>Aktive Latente Steuern</b>           | <b>11.573</b> | <b>9.385</b> |
| <b>Verbindlichkeiten:</b>               |               |              |
| Finanzielle Vermögenswerte              | 189           | 138          |
| Sonstige Immaterielle Vermögenswerte    | 1.357         | 1.286        |
| Sachanlagen                             | 787           | 700          |
| Vorräte                                 | 2.112         | 1.793        |
| Forderungen                             | 2.413         | 1.532        |
| Rückstellungen                          | 800           | 962          |
| Verbindlichkeiten                       | 265           | 168          |
| Sonstiges                               | 287           | 291          |
| Passive Latente Steuern                 | 8.210         | 6.870        |
| <b>Aktive Latente Steuern per saldo</b> | <b>3.363</b>  | <b>2.515</b> |

Ausschlaggebend für die Beurteilung der Werthaltigkeit aktiver Latenter Steuern ist die Einschätzung des Managements zur Realisierung der aktiven Latenten Steuern. Dies ist abhängig von der Entstehung künftiger steuerpflichtiger Gewinne während der Perioden, in denen sich steuerliche Bewertungsunterschiede umkehren und steuerliche Verlustvorräte geltend gemacht werden können. Hierbei werden die Wahrscheinlichkeit der Umkehrung der passiven Latenten Steuern sowie die künftigen steuerlichen Gewinne berücksichtigt. Aufgrund der Erfahrung aus der Vergangenheit und des zu erwartenden steuerlichen Einkommens wird grundsätzlich davon ausgegangen, dass die entsprechenden Vorteile aus den

aktiven Latenten Steuern realisiert werden können. Zum 30. September 2010 weist das Unternehmen bestimmte steuerliche Verlustvorträge aus, die Verlustverrechnungsbeschränkungen unterliegen. Für diese wird insoweit keine aktive Latente Steuer angesetzt, als deren Nutzung durch künftige positive steuerliche Ergebnisse nicht wahrscheinlich ist.

Die steuerlichen Verlustvorträge belaufen sich zum 30. September 2010 auf 6.496 (im Vj. 8.015) EUR. Die Gesellschaft geht davon aus, dass aufgrund der künftigen Geschäftstätigkeit ausreichend positives zu versteuerndes Einkommen für die Realisierung der aktiven Latenten Steuern zur Verfügung stehen wird.

Für die folgenden Sachverhalte wurden keine aktiven Latenten Steuern angesetzt (Brutto-Beträge):

|                                    | 30. September |            |
|------------------------------------|---------------|------------|
|                                    | 2010          | 2009       |
| Abzugsfähige temporäre Differenzen | 204           | 341        |
| Steuerliche Verlustvorträge        | 629           | 612        |
|                                    | <b>833</b>    | <b>953</b> |

Von den steuerlichen Verlustvorträgen, auf die keine aktiven Latenten Steuern angesetzt wurden, verfallen 297 (im Vj. 332) EUR im Zeitraum bis 2027.

Im Unternehmen sind in einigen Ländern mehrere Jahre noch nicht endgültig durch die Betriebsprüfung veranlagt. Hierfür sind adäquate Vorsorgen für die offenen Veranlagungsjahre gebildet.

Für ausschüttungsfähige Gewinne von Tochterunternehmen werden in Zusammenhang mit der Ausschüttung anfallende Ertragsteuern und Quellensteuern als Latente Steuern passiviert, wenn entweder davon auszugehen ist, dass diese Gewinne einer entsprechenden Besteuerung unterliegen, oder beabsichtigt ist, sie nicht auf Dauer zu reinvestieren. Für aufgelaufene Ergebnisse der Tochterunternehmen in Höhe von 15.609 (im Vj. 15.403) EUR wurden keine passiven Latenten Steuern gebildet, da diese Gewinne auf unbestimmte Zeit reinvestiert werden sollen.

Unter Berücksichtigung der direkten Eigenkapitalbuchungen und der Aufwendungen beziehungsweise Erträge aus fortgeführten und nicht fortgeführten Aktivitäten ergibt sich folgender Steueraufwand/-ertrag:

|                                                                          | Geschäftsjahr |              |
|--------------------------------------------------------------------------|---------------|--------------|
|                                                                          | 2010          | 2009         |
| Steueraufwand aus fortgeführten Aktivitäten                              | 1.699         | 1.434        |
| Steuerertrag (im Vj.: Steueraufwand) aus nicht fortgeführten Aktivitäten | - 11          | 58           |
| Direkt im Eigenkapital erfasster Steuerertrag                            | - 893         | - 231        |
|                                                                          | <b>795</b>    | <b>1.261</b> |

## 11 – Zur Veräußerung verfügbare finanzielle Vermögenswerte

Die folgenden Tabellen geben einen Überblick über den kurzfristigen Teil des Bestands an *Zur Veräußerung verfügbare finanzielle Vermögenswerte* des Unternehmens:

|                         | 30. September 2010 |                        |                       |                        |
|-------------------------|--------------------|------------------------|-----------------------|------------------------|
|                         | Anschaffungskosten | Beizulegender Zeitwert | Unrealisierter Gewinn | Unrealisierter Verlust |
| Eigenkapitalinstrumente | 6                  | 22                     | 16                    | -                      |
| Fremdkapitalinstrumente | 210                | 213                    | 3                     | -                      |
| Fondsanteile            | 11                 | 11                     | -                     | -                      |
|                         | <b>227</b>         | <b>246</b>             | <b>19</b>             | <b>-</b>               |

|                         | 30. September 2009 |                        |                       |                        |
|-------------------------|--------------------|------------------------|-----------------------|------------------------|
|                         | Anschaffungskosten | Beizulegender Zeitwert | Unrealisierter Gewinn | Unrealisierter Verlust |
| Eigenkapitalinstrumente | 7                  | 19                     | 12                    | -                      |
| Fremdkapitalinstrumente | 109                | 112                    | 3                     | -                      |
| Fondsanteile            | 38                 | 39                     | 1                     | -                      |
|                         | <b>154</b>         | <b>170</b>             | <b>16</b>             | <b>-</b>               |

Die Erlöse aus dem Verkauf von *Zur Veräußerung verfügbare finanzielle Vermögenswerte*, die in einem aktiven Markt gehandelt werden, beliefen sich für die Geschäftsjahre 2010 und 2009 auf 44 EUR beziehungsweise 35 EUR. Der realisierte Bruttogewinn aus dem Verkauf von *Zur Veräußerung verfügbare finanzielle Vermögenswerte* betrug für fortgeführte und nicht fortgeführte Aktivitäten für die Geschäftsjahre 2010 und 2009 5 EUR beziehungsweise 7 EUR. In den Geschäftsjahren 2010 und 2009 fielen überdies realisierte Bruttoverluste für fortgeführte und nicht fortgeführte Aktivitäten in Höhe von 3 EUR beziehungsweise 10 EUR an.

Die als langfristig klassifizierten zur Veräußerung verfügbaren finanziellen Vermögenswerte sind in der Position *Sonstige finanzielle Vermögenswerte* enthalten (siehe hierzu »Ziffer 20«).

## 12 – Forderungen aus Lieferungen und Leistungen und sonstige Forderungen

|                                            | 30. September |               |
|--------------------------------------------|---------------|---------------|
|                                            | 2010          | 2009          |
| Forderungen aus Lieferungen und Leistungen | 13.186        | 12.711        |
| Forderungen aus Finanzierungsleasing       | 1.785         | 1.738         |
|                                            | <b>14.971</b> | <b>14.449</b> |

Die folgende Tabelle gibt die Veränderungen in den Wertberichtigungen auf den Bestand an kurz- und langfristigen Forderungen (außer Forderungen aus Finanzierungsleasing) innerhalb der zu (fortgeführten) Anschaffungskosten bewerteten finanziellen Vermögenswerte und Verbindlichkeiten wieder (siehe auch »Ziffern 12, 13 und 20«):

|                                                                      | Geschäftsjahr |              |
|----------------------------------------------------------------------|---------------|--------------|
|                                                                      | 2010          | 2009         |
| Wertberichtigungen zum Beginn des Geschäftsjahrs                     | 1.116         | 913          |
| Erfolgswirksame Veränderung der Wertberichtigung im Berichtszeitraum | 63            | 449          |
| Ausbuchung von Forderungen                                           | - 240         | - 222        |
| Zahlungseingänge auf ursprünglich abgeschriebene Forderungen         | 13            | 7            |
| Währungsumrechnungseffekte                                           | 40            | - 24         |
| Umgliederungen in <i>Zur Veräußerung bestimmte Vermögenswerte</i>    | 1             | - 7          |
| <b>Wertberichtigungen zum Geschäftsjahresende</b>                    | <b>993</b>    | <b>1.116</b> |

Forderungen aus Finanzierungsleasing werden in der Bilanz wie folgt ausgewiesen:

|                                                            | 30. September |              |
|------------------------------------------------------------|---------------|--------------|
|                                                            | 2010          | 2009         |
| Forderungen aus Finanzierungsleasing, kurzfristig          | 1.785         | 1.738        |
| Forderungen aus Finanzierungsleasing, langfristiger Anteil | 3.094         | 3.147        |
|                                                            | <b>4.879</b>  | <b>4.885</b> |

Die Veränderungen der Wertberichtigungen auf den Bestand an kurz- und langfristigen Forderungen aus Finanzierungsleasing (siehe auch »Ziffern 12 und 20«) stellen sich wie folgt dar:

|                                                                      | Geschäftsjahr |            |
|----------------------------------------------------------------------|---------------|------------|
|                                                                      | 2010          | 2009       |
| Wertberichtigungen zum Beginn des Geschäftsjahrs                     | 165           | 100        |
| Erfolgswirksame Veränderung der Wertberichtigung im Berichtszeitraum | 45            | 148        |
| Ausbuchung von Forderungen                                           | - 64          | - 97       |
| Zahlungseingänge auf ursprünglich abgeschriebene Forderungen         | 15            | 18         |
| Währungsumrechnungseffekte                                           | 7             | - 4        |
| <b>Wertberichtigungen zum Geschäftsjahresende</b>                    | <b>168</b>    | <b>165</b> |

Die zukünftig zu erhaltenden Mindestleasingzahlungen stellen sich folgendermaßen dar:

|                                                                      | 30. September |              |
|----------------------------------------------------------------------|---------------|--------------|
|                                                                      | 2010          | 2009         |
| 2010                                                                 | –             | 2.084        |
| 2011                                                                 | 2.145         | 1.450        |
| 2012                                                                 | 1.428         | 978          |
| 2013                                                                 | 978           | 597          |
| 2014                                                                 | 541           | 280          |
| 2015                                                                 | 238           | –            |
| Nach 2015 im Geschäftsjahr 2010<br>(nach 2014 im Geschäftsjahr 2009) | 168           | 173          |
| <b>Zukünftige zu erhaltende<br/>Mindestleasingzahlungen</b>          | <b>5.498</b>  | <b>5.562</b> |

Die folgende Tabelle zeigt die Überleitung der zukünftigen Mindestleasingzahlungen zur Brutto- und Nettoinvestition in Leasingverhältnisse sowie zum Barwert der zukünftigen Mindestleasingzahlungen:

|                                                            | 30. September |              |
|------------------------------------------------------------|---------------|--------------|
|                                                            | 2010          | 2009         |
| Zukünftige Mindestleasingzahlungen                         | 5.498         | 5.562        |
| Zuzüglich: Nicht garantierter Restwert                     | 182           | 170          |
| Bruttoinvestition in Leasingverhältnisse                   | 5.680         | 5.732        |
| Abzüglich: Unrealisierter Finanzertrag                     | – 633         | – 682        |
| Nettoinvestition in Leasingverhältnisse                    | 5.047         | 5.050        |
| Abzüglich: Wertberichtigung<br>zweifelhafter Forderungen   | – 168         | – 165        |
| Abzüglich: Barwert des nicht<br>garantierten Restwerts     | – 153         | – 144        |
| <b>Barwert der zukünftigen<br/>Mindestleasingzahlungen</b> | <b>4.726</b>  | <b>4.741</b> |

Die Bruttoinvestition in Leasingverhältnisse sowie der Barwert der zukünftigen Mindestleasingzahlungen sind wie folgt fällig:

|                                                    | 30. September |       |
|----------------------------------------------------|---------------|-------|
|                                                    | 2010          | 2009  |
| Bruttoinvestition in Leasingverhältnisse           | 5.680         | 5.732 |
| fällig innerhalb eines Jahres                      | 2.187         | 2.117 |
| fällig zwischen ein und fünf Jahren                | 3.308         | 3.420 |
| fällig nach fünf Jahren                            | 185           | 195   |
| Barwert der zukünftigen<br>Mindestleasingzahlungen | 4.726         | 4.741 |
| fällig innerhalb eines Jahres                      | 1.785         | 1.707 |
| fällig zwischen ein und fünf Jahren                | 2.790         | 2.881 |
| fällig nach fünf Jahren                            | 151           | 153   |

Die Investitionen in Finanzierungsleasing resultieren überwiegend aus dem Leasinggeschäft mit Büro- und Datenverarbeitungsgeräten, Industrieausrüstungen, medizinischen Anlagen sowie mit Transportsystemen. Der tatsächliche Mittelzufluss wird infolge zukünftiger Verkäufe von Finanzforderungen, Vorauszahlungen und Forderungsausbuchungen abweichen.



## 13 – Sonstige kurzfristige finanzielle Vermögenswerte

|                              | 30. September |              |
|------------------------------|---------------|--------------|
|                              | 2010          | 2009         |
| Derivative Finanzinstrumente | 949           | 782          |
| Darlehensforderungen         | 740           | 786          |
| Sonstiges                    | 921           | 839          |
|                              | <b>2.610</b>  | <b>2.407</b> |

## 14 – Vorräte

|                                                                                                                                             | 30. September |               |
|---------------------------------------------------------------------------------------------------------------------------------------------|---------------|---------------|
|                                                                                                                                             | 2010          | 2009          |
| Roh-, Hilfs- und Betriebsstoffe                                                                                                             | 2.420         | 2.279         |
| Unfertige Erzeugnisse                                                                                                                       | 3.724         | 3.619         |
| Kosten und realisierte Gewinnanteile aus noch nicht abgeschlossenen Auftragsfertigungsprojekten, die die erhaltenen Anzahlungen übersteigen | 7.538         | 7.137         |
| Fertige Erzeugnisse und Waren                                                                                                               | 2.866         | 2.945         |
| Geleistete Anzahlungen                                                                                                                      | 657           | 565           |
|                                                                                                                                             | 17.205        | 16.545        |
| Erhaltene Anzahlungen                                                                                                                       | - 2.255       | - 2.416       |
|                                                                                                                                             | <b>14.950</b> | <b>14.129</b> |

Umsatzkosten enthalten für die Geschäftsjahre 2010 und 2009 Vorräte, die als Aufwand erfasst wurden, in Höhe von 52.083 (im Vj. 54.098) EUR. Roh-, Hilfs- und Betriebsstoffe, Unfertige Erzeugnisse, Fertige Erzeugnisse und Waren sind zu Anschaffungs-/Herstellungskosten beziehungsweise zum niedrigeren Nettoveräußerungswert bewertet. Die diesbezüglichen Wertberichtigungen haben sich im Vergleich zum Vorjahr um 128 (im Vj. um 162) EUR erhöht.

Die Position *Kosten und realisierte Gewinnanteile aus noch nicht abgeschlossenen Auftragsfertigungsprojekten, die die erhaltenen Anzahlungen übersteigen* beinhaltet unfertige Auftragsfertigungsprojekte mit einem aktivischen Saldo, bei denen die Auftragsfertigungskosten, zuzüglich der erfassten Gewinne und abzüglich der erfassten Verluste, die erhaltenen Anzahlungen übersteigen. Auftragsfertigungsprojekte (hier und folgend) beinhalten Serviceverträge, die nach der »Percentage-of-Completion«-Methode entsprechend dem Leistungsfortschritt bilanziert werden. Die Verbindlichkeiten aus Auftragsfertigungsprojekten, bei denen die erhaltenen Anzahlungen höher sind als die Herstellungskosten und die realisierten Gewinnanteile, abzüglich der erfassten Verluste, weist Siemens in der Position *Sonstige kurzfristige Verbindlichkeiten* aus (siehe »Ziffer 22«).

Der Gesamtbetrag der angefallenen Herstellungskosten und der realisierten Gewinnanteile, abzüglich der entstandenen Verluste für laufende Auftragsfertigungsprojekte, belief sich zum 30. September 2010 auf 71.497 (im Vj. 67.420) EUR. Die erhaltenen Anzahlungen für laufende Auftragsfertigungsprojekte betragen zum 30. September 2010 9.622 (im Vj. 8.442) EUR. Im Geschäftsjahr 2010 betrug der Umsatz für Auftragsfertigungsprojekte 27.152 (im Vj. 25.907) EUR. Die von Kunden einbehaltenen Beträge aus laufenden Auftragsfertigungsprojekten beliefen sich zum 30. September 2010 auf 681 (im Vj. 550) EUR. In den Angaben zu Auftragsfertigungsprojekten sind keine zur Veräußerung bestimmten Bestandteile enthalten.

## 15 – Sonstige kurzfristige Vermögenswerte

|                            | 30. September |              |
|----------------------------|---------------|--------------|
|                            | 2010          | 2009         |
| Sonstige Steuerforderungen | 686           | 618          |
| Abgrenzungsposten          | 296           | 317          |
| Sonstiges                  | 276           | 256          |
|                            | <b>1.258</b>  | <b>1.191</b> |

## 16 – Geschäfts- und Firmenwerte

Die Geschäfts- und Firmenwerte haben sich wie folgt verändert:

|                                                                                 | Geschäftsjahr |        |
|---------------------------------------------------------------------------------|---------------|--------|
|                                                                                 | 2010          | 2009   |
| <b>Anschaffungskosten</b>                                                       |               |        |
| Stand zu Beginn des Geschäftsjahrs                                              | 16.317        | 16.558 |
| Währungsumrechnung und Sonstiges                                                | 898           | - 366  |
| Akquisitionen und Anpassungen der Erstkonsolidierung                            | 246           | 232    |
| Verkäufe und Umgliederungen in <i>Zur Veräußerung bestimmte Vermögenswerte</i>  | - 25          | - 107  |
| Stand zum Geschäftsjahresende                                                   | 17.436        | 16.317 |
| <b>Kumulierte Abschreibungen aus Wertminderungen und sonstige Veränderungen</b> |               |        |
| Stand zu Beginn des Geschäftsjahrs                                              | 496           | 554    |
| Währungsumrechnung und Sonstiges                                                | 32            | - 12   |
| Wertminderungsaufwand des Geschäftsjahrs                                        | 1.145         | 32     |
| Verkäufe und Umgliederungen in <i>Zur Veräußerung bestimmte Vermögenswerte</i>  | -             | - 78   |
| Stand zum Geschäftsjahresende                                                   | 1.673         | 496    |
| <b>Buchwert</b>                                                                 |               |        |
| Stand zu Beginn des Geschäftsjahrs                                              | 15.821        | 16.004 |
| Stand zum Geschäftsjahresende                                                   | 15.763        | 15.821 |

|                                                | Buchwert<br>01.10.2009 | Währungs-<br>umrechnung/<br>Sonstiges | Akquisitionen<br>und Anpassungen<br>der Erst-<br>konsolidierung | Verkäufe und<br>Umgliederungen<br>in <i>Zur<br/>Veräußerung<br/>bestimmte Ver-<br/>mögenswerte</i> | Wert-<br>minderungen | Buchwert<br>30.09.2010 |
|------------------------------------------------|------------------------|---------------------------------------|-----------------------------------------------------------------|----------------------------------------------------------------------------------------------------|----------------------|------------------------|
| <b>Sektoren</b>                                |                        |                                       |                                                                 |                                                                                                    |                      |                        |
| Sektor Industry                                | 4.925                  | 267                                   | 28                                                              | - 24                                                                                               | -                    | 5.196                  |
| Sektor Energy                                  | 2.208                  | 98                                    | 201                                                             | -                                                                                                  | -                    | 2.507                  |
| Sektor Healthcare                              | 8.476                  | 492                                   | 3                                                               | -                                                                                                  | - 1.145              | 7.826                  |
| <b>Sektorübergreifende Geschäfte</b>           |                        |                                       |                                                                 |                                                                                                    |                      |                        |
| Siemens IT Solutions and Services              | 115                    | 4                                     | 14                                                              | - 1                                                                                                | -                    | 132                    |
| Siemens Financial Services (SFS)               | 97                     | 5                                     | -                                                               | -                                                                                                  | -                    | 102                    |
| <b>Zentral gesteuerte Portfolioaktivitäten</b> | -                      | -                                     | -                                                               | -                                                                                                  | -                    | -                      |
| <b>Siemens</b>                                 | <b>15.821</b>          | <b>866</b>                            | <b>246</b>                                                      | <b>- 25</b>                                                                                        | <b>- 1.145</b>       | <b>15.763</b>          |

|                                                | Buchwert<br>01.10.2008 | Währungs-<br>umrechnung/<br>Sonstiges | Akquisitionen<br>und Anpassungen<br>der Erst-<br>konsolidierung <sup>1</sup> | Verkäufe und<br>Umgliederungen<br>in Zur<br>Veräußerung<br>bestimmte Ver-<br>mögenswerte | Wert-<br>minderungen | Buchwert<br>30.09.2009 |
|------------------------------------------------|------------------------|---------------------------------------|------------------------------------------------------------------------------|------------------------------------------------------------------------------------------|----------------------|------------------------|
| <b>Sektoren</b>                                |                        |                                       |                                                                              |                                                                                          |                      |                        |
| Sektor Industry                                | 4.894 <sup>2</sup>     | - 111                                 | 168                                                                          | - 13                                                                                     | - 13                 | 4.925                  |
| Sektor Energy                                  | 2.240                  | - 63                                  | 47                                                                           | - 16                                                                                     | -                    | 2.208                  |
| Sektor Healthcare                              | 8.617                  | - 156                                 | 15                                                                           | -                                                                                        | -                    | 8.476                  |
| <b>Sektorübergreifende Geschäfte</b>           |                        |                                       |                                                                              |                                                                                          |                      |                        |
| Siemens IT Solutions and Services              | 123                    | - 10                                  | 2                                                                            | -                                                                                        | -                    | 115                    |
| Siemens Financial Services (SFS)               | 111                    | - 14                                  | -                                                                            | -                                                                                        | -                    | 97                     |
| <b>Zentral gesteuerte Portfolioaktivitäten</b> | 19 <sup>2</sup>        | -                                     | -                                                                            | -                                                                                        | - 19                 | -                      |
| <b>Siemens</b>                                 | <b>16.004</b>          | <b>- 354</b>                          | <b>232</b>                                                                   | <b>- 29</b>                                                                              | <b>- 32</b>          | <b>15.821</b>          |

<sup>1</sup> Enthält Anpassungen aufgrund der nachträglichen Erfassung aktiver Latenter Steuern.

<sup>2</sup> Electronics Assembly Systems wurde im Geschäftsjahr 2009 vom Sektor Industry zu Zentral gesteuerte Portfolioaktivitäten übertragen. Zur Gewährleistung der Vergleichbarkeit wurden die Vorjahresbeträge angepasst.

Im Geschäftsjahr 2010 sind positive Fremdwährungsumrechnungseffekte hauptsächlich auf die Aufwertung des US-Dollars zurückzuführen. Die Veränderungen durch Akquisitionen und Anpassungen der Erstkonsolidierung im Sektor Energy sind vorrangig auf die Akquisition von Solel Solar Systems, Ltd. (siehe »Ziffer 4«) zurückzuführen. Die Wertminderung von 1.145 EUR ist in der Division Diagnostics im Sektor Healthcare entstanden (siehe unten).

Siemens führt im vierten Quartal die verpflichtende jährliche Überprüfung der Werthaltigkeit der Geschäfts- und Firmenwerte in Übereinstimmung mit der unter »Ziffern 2 und 3« dargestellten Vorgehensweise durch. Mit Ausnahme der Division Diagnostics im Sektor Healthcare (siehe unten) wurden im Rahmen der Werthaltigkeitsprüfung für das Geschäftsjahr 2010 die erzielbaren Beträge der Divisionen und der Sektorübergreifenden Geschäfte höher als die Buchwerte eingeschätzt. Die grundlegenden Annahmen, auf denen das Unternehmen die Bestimmung des beizulegenden Zeitwerts, abzüglich Verkaufskosten der Divisionen und der Sektorübergreifenden Geschäfte, mit zugeordnetem Buchwert basiert, beinhalten im Geschäftsjahr 2010 und 2009 Wachstumsraten bis zu 3,0% sowie Abzinsungsfaktoren nach Steuern von 7,0% bis 8,0% im Geschäftsjahr 2010 sowie 7,5% bis 8,5% im Geschäftsjahr 2009. Falls möglich, wurden Marktpreise herangezogen.

Für die Ermittlung des beizulegenden Zeitwerts, abzüglich der Verkaufskosten der Divisionen und der Sektorübergreifenden Geschäfte, wurden Zahlungsmittelflüsse für die nächsten fünf Jahre prognostiziert, die auf Erfahrungen der Vergangenheit, aktuellen operativen Ergebnissen und der besten vom Management vorgenommenen Einschätzung über zukünftige Entwicklungen sowie auf Marktannahmen basieren.

Der beizulegende Zeitwert, abzüglich der Verkaufskosten, wird hauptsächlich bestimmt durch den Endwert (Barwert der ewigen Rente), der besonders sensitiv auf Veränderungen der Annahmen zur Wachstumsrate und zum Abzinsungsfaktor reagiert. Beide Annahmen werden individuell für jede Division und jedes Sektorübergreifende Geschäft festgelegt. Abzinsungsfaktoren spiegeln die gegenwärtigen Marktbeurteilungen der spezifischen Risiken jeder einzelnen Division und jedes einzelnen Sektorübergreifenden Geschäfts wider und basieren auf den gewichteten durchschnittlichen Kapitalkosten der Divisionen und der Sektorübergreifenden Geschäfte (für SFS entspricht der Abzinsungsfaktor den Eigenkapitalkosten). Die Endwert-Wachstumsraten berücksichtigen auch extern verfügbare makroökonomische Daten und spezifische Industrietrends.

Die nachfolgende Tabelle zeigt die wichtigsten Annahmen, die bei der Werthaltigkeitsprüfung von Divisionen, denen ein wesentlicher Geschäfts- und Firmenwert zugeordnet worden ist, für die Bestimmung des beizulegenden Zeitwerts, abzüglich der Verkaufskosten, herangezogen worden sind:

|                                        | Geschäftsjahr 2010        |                            |                            |
|----------------------------------------|---------------------------|----------------------------|----------------------------|
|                                        | Geschäfts- und Firmenwert | Langfristige Wachstumsrate | Nachsteuerabzinsungsfaktor |
| Diagnostics im Sektor Healthcare       | 4.727                     | 2,25%                      | 7,0%                       |
| Imaging & IT im Sektor Healthcare      | 2.911                     | 2,7%                       | 7,0%                       |
| Industry Automation im Sektor Industry | 2.266                     | 2,0%                       | 8,0%                       |

|                                        | Geschäftsjahr 2009        |                            |                            |
|----------------------------------------|---------------------------|----------------------------|----------------------------|
|                                        | Geschäfts- und Firmenwert | Langfristige Wachstumsrate | Nachsteuerabzinsungsfaktor |
| Diagnostics im Sektor Healthcare       | 5.507                     | 3,0%                       | 7,5%                       |
| Imaging & IT im Sektor Healthcare      | 2.782                     | 3,0%                       | 8,0%                       |
| Industry Automation im Sektor Industry | 2.250                     | 2,0%                       | 8,0%                       |

Zum 30. September 2010 wurde die planmäßige jährliche Werthaltigkeitsprüfung des Geschäfts- und Firmenwerts der Division Diagnostics im Sektor Healthcare durchgeführt. Als

Ergebnis wurde der Geschäfts- und Firmenwert um 1.145 EUR wertgemindert. Die Division Diagnostics geht aus den Akquisitionen der Diagnostic Products Corporation (DPC), der Diagnostics-Division der Bayer AG und der Dade Behring, Inc. hervor. Die Division agiert am globalen Gesundheitsmarkt für Diagnostiksysteme und Verbrauchsmaterialien, der sich steigenden Kostenbeschränkungen ausgesetzt sieht, jedoch weiterhin – hauptsächlich in Zusammenhang mit dem Megatrend »Demografischer Wandel« – als Wachstumsmarkt eingeschätzt wird. Während die in Verbindung mit der Integration der drei akquirierten Gesellschaften angestrebten Kostenziele erreicht wurden, wurden die Wachstumsziele nicht erfüllt.

Als Ergebnis der strategischen Überprüfung, die im vierten Quartal des Geschäftsjahrs 2010 abgeschlossen wurde, wurden die mittelfristigen Wachstumserwartungen der Division und die langfristigen Marktentwicklungen in der Labordiagnostik neu bewertet und der Geschäftsplan der Division entsprechend angepasst, um die erwarteten niedrigeren Wachstumserwartungen widerzuspiegeln. Zahlungsmittelflüsse jenseits des fünfjährigen Planungszeitraums wurden unter Anwendung einer gleichbleibenden Wachstumsrate von 2,25% extrapoliert. Die wesentlichen Gründe für diese niedrigeren Wachstumserwartungen und die deswegen angepassten Geschäftsziele sind verzögerte Entwicklungsaktivitäten im Technologie- und Produktbereich, verbunden mit zunehmendem Wettbewerb. Der aufgrund der strategischen Überprüfung angepasste Geschäftsplan war die Basis für den jährlichen Wertminderungstest für den Geschäfts- und Firmenwert im vierten Quartal des Geschäftsjahrs 2010.

## 17 – Sonstige Immaterielle Vermögenswerte

|                                                                    | Bruttowert 01.10.2009 | Währungs- umrechnungs- differenzen | Zugänge durch Unter- nehmens- zusammen- schlüsse | Zugänge    | Abgänge <sup>1</sup> | Bruttowert 30.09.2010 | Kumulierte Abschrei- bungen und Wertminder- ungen | Rest- buchwert 30.09.2010 | Abschrei- bungen und Wertminder- ungen im Geschäfts- jahr 2010 <sup>2</sup> |
|--------------------------------------------------------------------|-----------------------|------------------------------------|--------------------------------------------------|------------|----------------------|-----------------------|---------------------------------------------------|---------------------------|-----------------------------------------------------------------------------|
| Software und sonstige selbst erstellte Immaterielle Vermögenswerte | 2.664                 | 106                                | –                                                | 395        | – 97                 | 3.068                 | – 1.876                                           | 1.192                     | – 251                                                                       |
| Patente, Lizenzen und ähnliche Rechte                              | 6.519                 | 338                                | 87                                               | 117        | – 53                 | 7.008                 | – 3.231                                           | 3.777                     | – 607                                                                       |
| <b>Sonstige Immaterielle Vermögenswerte</b>                        | <b>9.183</b>          | <b>444</b>                         | <b>87</b>                                        | <b>512</b> | <b>– 150</b>         | <b>10.076</b>         | <b>– 5.107</b>                                    | <b>4.969</b>              | <b>– 858</b>                                                                |

- 1 Enthält *Sonstige Immaterielle Vermögenswerte*, die in *Zur Veräußerung bestimmte Vermögenswerte* umgegliedert wurden (siehe »Ziffer 4«).  
2 Enthält im Geschäftsjahr 2010 Abschreibungen wegen Wertminderungen in Höhe von – 29 EUR, davon – 19 EUR beim Sektor Healthcare.

|                                                                    | Bruttowert<br>01.10.2008 | Währungs-<br>umrech-<br>nungsdiffe-<br>renzen | Zugänge<br>durch Unter-<br>nehmens-<br>zusammen-<br>schlüsse | Zugänge    | Abgänge <sup>1</sup> | Bruttowert<br>30.09.2009 | Kumulierte<br>Abschrei-<br>bungen und<br>Wertminder-<br>ungen | Rest-<br>buchwert<br>30.09.2009 | Abschrei-<br>bungen und<br>Wertminder-<br>ungen im<br>Geschäfts-<br>jahr 2009 <sup>2</sup> |
|--------------------------------------------------------------------|--------------------------|-----------------------------------------------|--------------------------------------------------------------|------------|----------------------|--------------------------|---------------------------------------------------------------|---------------------------------|--------------------------------------------------------------------------------------------|
| Software und sonstige selbst erstellte Immaterielle Vermögenswerte | 2.492                    | - 47                                          | - 1                                                          | 382        | - 162                | 2.664                    | - 1.609                                                       | 1.055                           | - 264                                                                                      |
| Patente, Lizenzen und ähnliche Rechte                              | 6.524                    | - 105                                         | 105                                                          | 59         | - 64                 | 6.519                    | - 2.548                                                       | 3.971                           | - 570                                                                                      |
| <b>Sonstige Immaterielle Vermögenswerte</b>                        | <b>9.016</b>             | <b>- 152</b>                                  | <b>104</b>                                                   | <b>441</b> | <b>- 226</b>         | <b>9.183</b>             | <b>- 4.157</b>                                                | <b>5.026</b>                    | <b>- 834</b>                                                                               |

- 1 Enthält *Sonstige Immaterielle Vermögenswerte*, die in *Zur Veräußerung bestimmte Vermögenswerte* umgegliedert wurden (siehe »Ziffer 4«).  
2 Enthält im Geschäftsjahr 2009 Abschreibungen wegen Wertminderungen in Höhe von - 22 EUR.

Der Abschreibungsaufwand für *Immaterielle Vermögenswerte* ist in den Positionen *Umsatzkosten, Forschungs- und Entwicklungskosten* sowie *Vertriebs- und allgemeine Verwaltungskosten* entsprechend der Nutzung der Vermögenswerte enthalten.

Die vertraglichen Verpflichtungen für den Kauf von Sonstigen Immateriellen Vermögenswerten belaufen sich zum 30. September 2010 und zum 30. September 2009 auf 44 EUR beziehungsweise 35 EUR.

## 18 – Sachanlagen

|                                           | Bruttowert<br>01.10.2009 | Währungs-<br>umrech-<br>nungsdiffe-<br>renzen | Zugänge<br>durch Unter-<br>nehmens-<br>zusammen-<br>schlüsse | Zugänge      | Umbu-<br>chungen | Abgänge <sup>1</sup> | Bruttowert<br>30.09.2010 | Kumulierte<br>Abschrei-<br>bungen und<br>Wertminder-<br>ungen | Rest-<br>buchwert<br>30.09.2010 | Abschrei-<br>bungen und Wert-<br>minder-<br>ungen im<br>Geschäfts-<br>jahr 2010 <sup>2</sup> |
|-------------------------------------------|--------------------------|-----------------------------------------------|--------------------------------------------------------------|--------------|------------------|----------------------|--------------------------|---------------------------------------------------------------|---------------------------------|----------------------------------------------------------------------------------------------|
| Grundstücke und Bauten                    | 8.663                    | 289                                           | 31                                                           | 241          | 286              | - 914                | 8.596                    | - 4.078                                                       | 4.518                           | - 386                                                                                        |
| Technische Anlagen und Maschinen          | 8.639                    | 327                                           | 54                                                           | 369          | 278              | - 412                | 9.255                    | - 6.299                                                       | 2.956                           | - 568                                                                                        |
| Betriebs- und Geschäftsausstattung        | 6.492                    | 209                                           | 3                                                            | 639          | 71               | - 617                | 6.797                    | - 5.294                                                       | 1.503                           | - 765                                                                                        |
| Vermietete Erzeugnisse                    | 2.677                    | 154                                           | -                                                            | 623          | 9                | - 288                | 3.175                    | - 1.516                                                       | 1.659                           | - 397                                                                                        |
| Geleistete Anzahlungen und Anlagen im Bau | 963                      | 37                                            | 10                                                           | 764          | - 644            | - 16                 | 1.114 <sup>3</sup>       | - 2                                                           | 1.112                           | -                                                                                            |
| <b>Sachanlagen</b>                        | <b>27.434</b>            | <b>1.016</b>                                  | <b>98</b>                                                    | <b>2.636</b> | <b>-</b>         | <b>- 2.247</b>       | <b>28.937</b>            | <b>- 17.189</b>                                               | <b>11.748</b>                   | <b>- 2.116</b>                                                                               |

- 1 Enthält im Geschäftsjahr 2010 *Sachanlagen*, die in *Zur Veräußerung bestimmte Vermögenswerte* umgegliedert wurden (siehe »Ziffer 4«).  
2 Enthält im Geschäftsjahr 2010 Abschreibungen wegen Wertminderungen in Höhe von - 130 EUR, einschließlich - 39 EUR aufgrund der Wertminderungen von Immobilien, die von der Division Diagnostics im Sektor Healthcare an SRE übertragen wurden, sowie - 71 EUR bei SRE.  
3 Enthält 979 EUR aktivierte Aufwendungen aufgrund von Sachanlagen im Bau.

|                                              | Bruttowert<br>01.10.2008 | Währungs-<br>umrech-<br>nungsdiffe-<br>renzen | Zugänge<br>durch<br>Unterneh-<br>menszu-<br>sammen-<br>schlüsse | Zugänge      | Umbu-<br>chungen | Abgänge <sup>1</sup> | Bruttowert<br>30.09.2009 | Kumulierte<br>Abschrei-<br>bungen<br>und<br>Wertminde-<br>rungen | Rest-<br>buchwert<br>30.09.2009 | Abschrei-<br>bungen<br>und Wert-<br>minde-<br>rungen im<br>Geschäfts-<br>jahr 2009 <sup>2</sup> |
|----------------------------------------------|--------------------------|-----------------------------------------------|-----------------------------------------------------------------|--------------|------------------|----------------------|--------------------------|------------------------------------------------------------------|---------------------------------|-------------------------------------------------------------------------------------------------|
| Grundstücke und Bauten                       | 8.228                    | - 79                                          | 128                                                             | 717          | 287              | - 618                | 8.663                    | - 4.112                                                          | 4.551                           | - 302                                                                                           |
| Technische Anlagen<br>und Maschinen          | 8.252                    | - 120                                         | 11                                                              | 496          | 389              | - 389                | 8.639                    | - 5.875                                                          | 2.764                           | - 562                                                                                           |
| Betriebs- und<br>Geschäftsausstattung        | 6.654                    | - 93                                          | 14                                                              | 660          | 110              | - 853                | 6.492                    | - 4.969                                                          | 1.523                           | - 769                                                                                           |
| Vermietete Erzeugnisse                       | 2.630                    | - 84                                          | -                                                               | 495          | 35               | - 399                | 2.677                    | - 1.153                                                          | 1.524                           | - 375                                                                                           |
| Geleistete Anzahlungen<br>und Anlagen im Bau | 1.180                    | - 11                                          | 3                                                               | 692          | - 821            | - 80                 | 963 <sup>3</sup>         | - 2                                                              | 961                             | -                                                                                               |
| <b>Sachanlagen</b>                           | <b>26.944</b>            | <b>- 387</b>                                  | <b>156</b>                                                      | <b>3.060</b> | <b>-</b>         | <b>- 2.339</b>       | <b>27.434</b>            | <b>- 16.111</b>                                                  | <b>11.323</b>                   | <b>- 2.008</b>                                                                                  |

- 1 Enthält Sachanlagen, die in Zur Veräußerung bestimmte Vermögenswerte umgliedert wurden (siehe »Ziffer 4«).  
2 Enthält Abschreibungen wegen Wertminderungen in Höhe von - 74 EUR im Geschäftsjahr 2009.  
3 Enthält 819 EUR aktivierte Aufwendungen aufgrund von Sachanlagen im Bau.

Zum 30. September 2010 und 2009 betragen die vertraglichen Verpflichtungen für den Kauf von Sachanlagen 459 (im Vj. 336) EUR.

Für den Kauf oder die Herstellung von Sachanlagevermögen wurden im Geschäftsjahr 2010 und 2009 Zuwendungen der öffentlichen Hand in Höhe von 23 (im Vj. 35) EUR gewährt. Weitere Beträge in Höhe von 98 (im Vj. 79) EUR wurden als öffentliche Zuwendungen für angefallene beziehungsweise künftige Aufwendungen gewährt.

Die zukünftigen Zahlungen von Leasingnehmern aus Operating-Leasingverträgen betragen zum 30. September 2010 und 2009:

|                                                                      | 30. September |              |
|----------------------------------------------------------------------|---------------|--------------|
|                                                                      | 2010          | 2009         |
| 2010                                                                 | -             | 516          |
| 2011                                                                 | 488           | 371          |
| 2012                                                                 | 372           | 274          |
| 2013                                                                 | 283           | 187          |
| 2014                                                                 | 202           | 125          |
| 2015                                                                 | 161           | -            |
| Nach 2015 im Geschäftsjahr 2010<br>(nach 2014 im Geschäftsjahr 2009) | 165           | 172          |
| <b>Summe</b>                                                         | <b>1.671</b>  | <b>1.645</b> |

Zahlungen von Leasingnehmern aus Operating-Leasingverträgen beziehen sich auf Gebäude, Datenverarbeitungs- und Telefonanlagen sowie auf medizinische Anlagen. Bedingte Mietzahlungen sind im Ergebnis der Geschäftsjahre 2010 und 2009 in Höhe von insgesamt 233 (im Vj. 182) EUR enthalten.

### Als Finanzinvestition gehaltene Immobilien

Als Finanzinvestition gehaltene Immobilien umfasst Immobilien, die die Gesellschaft besitzt, um Mieteinnahmen zu erhalten und/oder um Wertsteigerungen zu erzielen, und die sie nicht in der Produktion oder für Verwaltungszwecke einsetzt.

Die Buchwerte von Als Finanzinvestition gehaltene Immobilien betragen zum 30. September 2010 130 (im Vj. 166) EUR, im Vergleich zu den beizulegenden Zeitwerten in Höhe von 248 (im Vj. 329) EUR. Die beizulegenden Zeitwerte werden überwiegend nach der Discounted-Cashflow-Methode ermittelt. Ausnahmen bilden bestimmte Fälle, für die Bewertungsgutachten vorliegen.



## 19 – Nach der Equity-Methode bilanzierte Beteiligungen

Die bedeutendsten, nach der Equity-Methode bilanzierten Beteiligungen, die alle nicht börsennotiert sind, sind zum 30. September 2010 und 2009 (in alphabetischer Reihenfolge):

|                                                       | Beteiligungsquote |                   |
|-------------------------------------------------------|-------------------|-------------------|
|                                                       | 30. Sept. 2010    | 30. Sept. 2009    |
| BSH Bosch und Siemens Hausgeräte GmbH (BSH)           | 50 %              | 50 %              |
| BWI Informationstechnik GmbH                          | 50 % <sup>1</sup> | 50 % <sup>1</sup> |
| Enterprise Networks Holdings B.V.                     | 49 %              | 49 %              |
| Krauss-Maffei Wegmann GmbH & Co. KG                   | 49 %              | 49 %              |
| Maschinenfabrik Reinhausen GmbH                       | 26 %              | 26 %              |
| Nokia Siemens Networks Holding B.V.                   | 50 % <sup>2</sup> | 50 % <sup>2</sup> |
| P.T. Jawa Power                                       | 50 % <sup>3</sup> | 50 % <sup>3</sup> |
| Shanghai Electric Power Generation Equipment Co. Ltd. | 40 %              | 34 %              |
| Voith Hydro Holding GmbH & Co. KG                     | 35 %              | 35 %              |

- 1 Die exakte Quote der Stimmrechtsanteile beträgt 50,05 %. Diese Beteiligung wird von Siemens aufgrund signifikanter Mitbestimmungsrechte der beiden anderen Anteilseigner nicht beherrscht.
- 2 Die exakte Quote der Stimmrechtsanteile beträgt 50 %, abzüglich 25 Stimmrechte.
- 3 Die Beteiligung stellt kein gemeinschaftlich geführtes Unternehmen dar.

Im Geschäftsjahr 2010 wurde Capital Meters Holding Ltd., eine vom Sektor Energy gehaltene und nach der Equity-Methode bilanzierte Beteiligung, verkauft. Der daraus resultierende Gewinn wird im Ergebnis aus nach der Equity-Methode bilanzierten Beteiligungen ausgewiesen. Zum Verkauf der 25 %-Minderheitsbeteiligung an Dräger Medical AG & Co. KG siehe »Ziffer 4«.

Die Beteiligungen an AREVA NP S.A.S. und Fujitsu Siemens Computers (Holding) B.V. (FSC) wurden im Januar 2009 beziehungsweise September 2008 in die Position *Zur Veräußerung bestimmte Vermögenswerte* umgegliedert. Die Bilanzierung nach der Equity-Methode wurde zu diesem Zeitpunkt ausgesetzt (für weitere Informationen zu AREVA NP S.A.S. siehe »Ziffer 4«). FSC wurde im April 2009 verkauft (für weitere Informationen zu den Verkäufen siehe »Ziffer 4«).

Die Anteile an BSH, dem wesentlichen gemeinschaftlich geführten Unternehmen von Siemens, werden nach der Equity-Methode – wie in »Ziffer 2« beschrieben – auf Basis der zum 30. Juni endenden Zwölfmonatsperiode bilanziert. Die nachfolgenden Informationen von BSH basieren auf den jeweils zuletzt veröffentlichten Jahresabschlüssen (ohne Anpassung an die von Siemens gehaltene Beteiligungsquote):

|                | Geschäftsjahresende 31. Dezember |       |
|----------------|----------------------------------|-------|
|                | 2009                             | 2008  |
| Umsatz         | 8.405                            | 8.758 |
| Gewinn/Verlust | 328                              | 311   |

|                                                   | 31. Dezember |       |
|---------------------------------------------------|--------------|-------|
|                                                   | 2009         | 2008  |
| Kurzfristige Vermögenswerte                       | 3.797        | 3.678 |
| Langfristige Vermögenswerte                       | 2.646        | 2.495 |
| Kurzfristige Verbindlichkeiten und Rückstellungen | 2.170        | 2.033 |
| Langfristige Verbindlichkeiten und Rückstellungen | 1.738        | 1.744 |

Zusammenfassende Finanzinformationen für unsere wesentlichen Beteiligungen an assoziierten Unternehmen (ohne Anpassung an die von Siemens gehaltene Beteiligungsquote) werden nachfolgend gezeigt. Die Informationen der Gewinn- und Verlustrechnung entsprechen dem Zwölfmonatszeitraum, der der Equity-Bilanzierung zugrunde liegt.

|                | Geschäftsjahresende 30. September |         |
|----------------|-----------------------------------|---------|
|                | 2010                              | 2009    |
| Umsatz         | 19.257                            | 19.557  |
| Gewinn/Verlust | - 861                             | - 2.686 |

Die Bilanzinformationen entsprechen dem Stichtag, der der jeweiligen Equity-Bilanzierung zugrunde liegt.

|                                            | 30. September |        |
|--------------------------------------------|---------------|--------|
|                                            | 2010          | 2009   |
| Summe Aktiva                               | 18.005        | 19.512 |
| Summe Verbindlichkeiten und Rückstellungen | 12.691        | 13.848 |

Für Informationen zu Eventualverbindlichkeiten der Gemeinschaftsunternehmen und assoziierten Unternehmen siehe »Ziffer 39«.

Informationen zur Wertminderung der Beteiligung an NSN im Geschäftsjahr 2009 finden sich in »Ziffer 8«.

## 20 – Sonstige finanzielle Vermögenswerte

|                                                          | 30. September |               |
|----------------------------------------------------------|---------------|---------------|
|                                                          | 2010          | 2009          |
| Forderungen aus Finanzierungsleasing (siehe »Ziffer 12«) | 3.094         | 3.147         |
| Darlehensforderungen                                     | 3.032         | 2.949         |
| Derivative Finanzinstrumente                             | 2.693         | 2.089         |
| Forderungen aus Lieferungen und Leistungen               | 531           | 453           |
| Zur Veräußerung verfügbare finanzielle Vermögenswerte    | 486           | 391           |
| Sonstiges                                                | 1.460         | 1.496         |
|                                                          | <b>11.296</b> | <b>10.525</b> |

In *Zur Veräußerung verfügbare finanzielle Vermögenswerte* weist Siemens Beteiligungen aus, die zu Anschaffungskosten oder mit dem beizulegenden Zeitwert bilanziert werden, sofern sich dieser verlässlich ermitteln lässt. Informationen zu *Derivative Finanzinstrumente* finden Sie in den »Ziffern 31 und 32«. *Darlehensforderungen* resultieren im Wesentlichen aus langfristigen Darlehenstransaktionen der SFS. *Darlehensforderungen* beinhalten ein im Geschäftsjahr 2009 begebenes Gesellschafterdarlehen an NSN (siehe »Ziffer 39«).

## 21 – Sonstige kurzfristige finanzielle Verbindlichkeiten

|                                                          | 30. September |              |
|----------------------------------------------------------|---------------|--------------|
|                                                          | 2010          | 2009         |
| Derivative Finanzinstrumente (siehe »Ziffern 31 und 32«) | 442           | 454          |
| Zinsabgrenzungen                                         | 327           | 325          |
| Sonstiges                                                | 632           | 821          |
|                                                          | <b>1.401</b>  | <b>1.600</b> |

## 22 – Sonstige kurzfristige Verbindlichkeiten

|                                                                                                                                                   | 30. September |               |
|---------------------------------------------------------------------------------------------------------------------------------------------------|---------------|---------------|
|                                                                                                                                                   | 2010          | 2009          |
| Erhaltene Anzahlungen auf noch nicht abgeschlossene Auftragsfertigungsprojekte, die die Auftragskosten und realisierten Gewinnanteile übersteigen | 12.180        | 11.031        |
| Sonstige Personalaufwendungen                                                                                                                     | 2.265         | 2.567         |
| Lohn- und Gehaltsverpflichtungen, Lohnsteuern und Sozialabgaben                                                                                   | 2.121         | 1.908         |
| Sondervergütungsverpflichtungen                                                                                                                   | 1.582         | 1.046         |
| Verbindlichkeiten für ausstehende Rechnungen                                                                                                      | 987           | 789           |
| Sonstige Steuerverbindlichkeiten                                                                                                                  | 657           | 689           |
| Abgrenzung für erhaltene Reservierungsgebühren                                                                                                    | 77            | 536           |
| Passive Abgrenzungsposten                                                                                                                         | 940           | 594           |
| Sonstiges                                                                                                                                         | 985           | 1.151         |
|                                                                                                                                                   | <b>21.794</b> | <b>20.311</b> |

*Sonstige Personalaufwendungen* setzen sich hauptsächlich aus Verpflichtungen für Urlaubsrückstände, Gleitzeitguthaben, Jubiläumsaufwendungen, Abfindungszahlungen an Mitarbeiter sowie Verbindlichkeiten aufgrund der Restrukturierung bei Siemens IT Solutions and Services und Verbindlichkeiten in Zusammenhang mit dem SG&A-Programm zusammen (siehe »Ziffer 5«).

## 23 – Finanzschulden

|                                                                                          | 30. September |               |
|------------------------------------------------------------------------------------------|---------------|---------------|
|                                                                                          | 2010          | 2009          |
| <b>Kurzfristig</b>                                                                       |               |               |
| Anleihen und Schuldverschreibungen                                                       | 2.062         | –             |
| Verbindlichkeiten gegenüber Kreditinstituten                                             | 283           | 261           |
| Sonstige Finanzschulden                                                                  | 22            | 392           |
| Verbindlichkeiten aus Finanzierungsleasing                                               | 49            | 45            |
| Kurzfristige Finanzschulden und kurzfristig fällige Anteile langfristiger Finanzschulden | 2.416         | 698           |
| <b>Langfristig</b>                                                                       |               |               |
| Anleihen und Schuldverschreibungen (Fälligkeit bis 2066)                                 | 15.238        | 16.502        |
| Verbindlichkeiten gegenüber Kreditinstituten (Fälligkeit bis 2023)                       | 1.981         | 1.910         |
| Sonstige Finanzschulden (Fälligkeit bis 2018)                                            | 156           | 379           |
| Verbindlichkeiten aus Finanzierungsleasing                                               | 122           | 149           |
| Langfristige Finanzschulden                                                              | 17.497        | 18.940        |
|                                                                                          | <b>19.913</b> | <b>19.638</b> |

Im Geschäftsjahr 2010 lag der gewichtete Durchschnittszins für Verbindlichkeiten gegenüber Kreditinstituten bei 2,6 (im Vj. 3,4)%, für Sonstige Finanzschulden bei 4,7 (im Vj. 2,9)% und für Verbindlichkeiten aus Finanzierungsleasing bei 3,9 (im Vj. 4,0)%.

### a) Programm zur Begebung kurzfristiger Schuldverschreibungen (Commercial Paper)

Der Gesellschaft steht ein Programm zur Begebung kurzfristiger Schuldverschreibungen über 9,0 Mrd. USD (6,6 Mrd. EUR) zur Verfügung, das in mehreren Währungen gezogen werden kann und das auch die Möglichkeit für die Begebung von verlängerbaren USD-Anleihen (USD Extendible Notes) enthält. Die kurzfristigen Schuldverschreibungen belaufen sich zum 30. September 2010 auf 0 EUR. Der Vorjahreswert belief sich auf 337 EUR mit Zinssätzen von 0,21% bis 0,23% (siehe auch unten »Sonstige Finanzschulden«), Unsere begebenen kurzfristigen Schuldverschreibungen haben in der Regel eine Laufzeit von weniger als 90 Tagen.

### b) Anleihen und Schuldverschreibungen

#### Programm zur Ausgabe von Verschuldungsinstrumenten, vormals Euro Medium-Term-Notes-Programm

Durch Vereinbarungen mit Finanzinstitutionen konnte die Gesellschaft zum 30. September 2010 bis zu 15,0 Mrd. EUR an Medium-Term-Notes begeben (im Vj. bis zu 15,0 Mrd. EUR). Zum 30. September 2010 belief sich der ausstehende nominale Betrag auf 8,9 Mrd. EUR (im Vj. 8,8 Mrd. EUR). Darin enthalten ist eine variabel verzinsliche USD-Tranche in Höhe von 500 Mio. USD (366 EUR) mit Fälligkeit im März 2012 mit einem Zinssatz von 0,15% über 3-Monate-London-Interbank-Offered-Rate (3m LIBOR), eine festverzinsliche USD-Tranche in Höhe von 500 Mio. USD (366 EUR) mit Fälligkeit im März 2016 (Zinssatz: 5,625%) sowie eine 1,55 Mrd. EUR 5,250% Schuldverschreibung, fällig am 12. Dezember 2011, eine 1,0 Mrd. EUR 5,375% Schuldverschreibung, fällig am 11. Juni 2014, und eine 1,6 Mrd. EUR 5,625% Schuldverschreibung, fällig am 11. Juni 2018. Im Geschäftsjahr 2009 erneuerte Siemens das Programm und emittierte unter diesem Programm zusätzliche festverzinsliche Schuldverschreibungen in Höhe von 4,0 Mrd. EUR in zwei Tranchen: eine 2,0 Mrd. EUR 4,125% Schuldverschreibung, fällig am 20. Februar 2013, und eine 2,0 Mrd. EUR 5,125% Schuldverschreibung, fällig am 20. Februar 2017.

#### Verlängerbare Anleihe (Extendible Notes)

Im Geschäftsjahr 2008 emittierte die Gesellschaft variabel verzinsliche verlängerbare Anleihen über einen Nominalbetrag von 500 EUR zu 0,23% über der 3-Monate-European-Interbank-Offered-Rate (3m EURIBOR), die am ersten Fälligkeitstag Ende Juni 2009 zum Nominalbetrag zurückgezahlt wurde.

#### USD Medium-Term-Notes

Im August 2006 emittierte die Gesellschaft Schuldverschreibungen in Höhe von 5,0 Mrd. USD (3,7 Mrd. EUR) in vier Tranchen: 750 Mio. USD variabel verzinsliche Schuldverschreibungen (USD LIBOR + 0,05%), fällig am 14. August 2009, die am Fälligkeitstag zum Nominalbetrag zurückgezahlt wurden, 750 Mio. USD 5,5% Schuldverschreibungen, fällig am 16. Februar 2012, 1,750 Mrd. USD 5,75% Schuldverschreibungen, fällig am 17. Oktober 2016, und 1,750 Mrd. USD 6,125% Schuldverschreibungen, fällig am 17. August 2026. Die variabel verzinslichen Schuldverschreibungen kann die Gesellschaft am oder nach dem 14. Februar 2008, die festverzinslichen Schuldverschreibungen jederzeit vollständig oder teilweise zu dem in den Emissionsbedingungen festgelegten vorzeitigen Rückzahlungsbetrag zurückkaufen (Call).

### Hybridschuldverschreibung

Im September 2006 emittierte die Gesellschaft eine nachrangige Hybridschuldverschreibung, die von Siemens vollständig nachrangig garantiert ist. Sie umfasst eine Euro-Tranche in Höhe von 900 EUR und eine GBP-Tranche in Höhe von 750 Mio. GBP (872 EUR). Beide Tranchen sind am 14. September 2066 zur Rückzahlung fällig. Siemens kann die Schuldverschreibungen im Jahr 2016 oder zu einem späteren Zeitpunkt kündigen. Die Schuldverschreibungen sind bis zum 14. September 2016 festverzinslich (5,25 % für Schuldverschreibun-

gen der EUR-Tranche und 6,125 % für Schuldverschreibungen der GBP-Tranche). Danach sind die Schuldverschreibungen gemäß den Emissionsbedingungen variabel verzinslich.

### Euro-Schuldverschreibungen

Im Juni 2001 begab die Gesellschaft 5,75 % Euro-Schuldverschreibungen in Höhe von 2 Mrd. EUR, fällig im Juli 2011.

Die Anleihen und Schuldverschreibungen der Gesellschaft setzen sich folgendermaßen zusammen:

|                                               | Währung                    |       | 30. September 2010           |     | Währung                    |               | 30. September 2009           |  |
|-----------------------------------------------|----------------------------|-------|------------------------------|-----|----------------------------|---------------|------------------------------|--|
|                                               | (Nominalwert in Millionen) |       | Buchwert in EUR <sup>1</sup> |     | (Nominalwert in Millionen) |               | Buchwert in EUR <sup>1</sup> |  |
| USD LIBOR+0,15 % 2006/2012 USD-Anleihe        | USD                        | 500   | 366                          | USD | 500                        | 341           |                              |  |
| 5,625 % 2006/2016 USD-Anleihe                 | USD                        | 500   | 437                          | USD | 500                        | 386           |                              |  |
| 5,25 % 2008/2011 EUR Medium-Term-Note         | EUR                        | 1.550 | 1.619                        | EUR | 1.550                      | 1.644         |                              |  |
| 5,375 % 2008/2014 EUR Medium-Term-Note        | EUR                        | 1.000 | 1.099                        | EUR | 1.000                      | 1.084         |                              |  |
| 5,625 % 2008/2018 EUR Medium-Term-Note        | EUR                        | 1.600 | 1.858                        | EUR | 1.600                      | 1.763         |                              |  |
| 4,125 % 2009/2013 EUR Medium-Term-Note        | EUR                        | 2.000 | 2.030                        | EUR | 2.000                      | 2.000         |                              |  |
| 5,125 % 2009/2017 EUR Medium-Term-Note        | EUR                        | 2.000 | 2.085                        | EUR | 2.000                      | 1.977         |                              |  |
| <b>Gesamtbetrag Euro Medium-Term-Notes</b>    |                            |       | <b>9.494</b>                 |     |                            | <b>9.195</b>  |                              |  |
| 5,5 % 2006/2012 USD-Anleihe                   | USD                        | 750   | 586                          | USD | 750                        | 556           |                              |  |
| 5,75 % 2006/2016 USD-Anleihe                  | USD                        | 1.750 | 1.503                        | USD | 1.750                      | 1.366         |                              |  |
| 6,125 % 2006/2026 USD-Anleihe                 | USD                        | 1.750 | 1.683                        | USD | 1.750                      | 1.439         |                              |  |
| <b>Gesamtbetrag USD Medium-Term-Notes</b>     |                            |       | <b>3.772</b>                 |     |                            | <b>3.361</b>  |                              |  |
| 5,25 % 2006/2066 EUR-Anleihe                  | EUR                        | 900   | 984                          | EUR | 900                        | 941           |                              |  |
| 6,125 % 2006/2066 GBP-Anleihe                 | GBP                        | 750   | 988                          | GBP | 750                        | 874           |                              |  |
| <b>Gesamtbetrag Hybridschuldverschreibung</b> |                            |       | <b>1.972</b>                 |     |                            | <b>1.815</b>  |                              |  |
| 5,75 % 2001/2011 EUR-Anleihe                  | EUR                        | 2.000 | 2.062                        | EUR | 2.000                      | 2.129         |                              |  |
|                                               |                            |       | <b>2.062</b>                 |     |                            | <b>2.129</b>  |                              |  |
| <b>Sonstige</b>                               |                            |       | <b>-</b>                     |     |                            | <b>2</b>      |                              |  |
|                                               |                            |       | <b>17.300</b>                |     |                            | <b>16.502</b> |                              |  |

<sup>1</sup> Enthält Anpassungen aufgrund von Derivaten, die der Absicherung des beizulegenden Zeitwerts dienen und die die Voraussetzungen für die Bilanzierung einer Sicherungsbeziehung erfüllen (Fair Value Hedges).

### c) Schuldscheindarlehen

Im dritten Quartal des Geschäftsjahrs 2008 emittierte die Gesellschaft Schuldscheindarlehen. Die Schuldscheindarlehen mit einem Nominal- und Buchwert in Höhe von 1,1 Mrd. EUR zum 30. September 2010 und 2009 wurden für allgemeine Zwecke in vier Tranchen emittiert. Sie bestehen aus einer variabel verzinslichen Tranche in Höhe von 370 EUR mit einem Zinssatz von 0,55% über dem 6-Monate-EURIBOR, fällig am 12. Juni 2013, einer mit 5,283% festverzinslichen Tranche in Höhe von 113,5 EUR, ebenfalls fällig am 12. Juni 2013, einer weiteren variabel verzinslichen Tranche in Höhe von 283,5 EUR mit einem Zinssatz von 0,70% über dem 6-Monate-EURIBOR, fällig am 12. Juni 2015, sowie einer weiteren, zu 5,435% festverzinslichen Tranche in Höhe von 333 EUR, ebenfalls fällig am 12. Juni 2015.

### d) Kreditlinien

Der Gesellschaft standen zum 30. September 2010 zugesagte Kreditlinien in einem Gesamtvolumen in Höhe von 7,04 Mrd. (im Vj. 6,6 Mrd.) EUR zur Verfügung. Sie umfassen eine revolvingende Kreditlinie in Höhe von 5,0 Mrd. USD bis März 2012 sowie eine Kreditlinie in Höhe von 4,0 Mrd. USD bis August 2013, die beide in mehreren Währungen gezogen werden können. Die Kreditlinie in Höhe von 4 Mrd. USD umfasst einen Kredit (»Term Loan«) in Höhe von 1,0 Mrd. USD und eine revolvingende Kreditlinie in Höhe von 3,0 Mrd. USD. Der 1,0 Mrd. USD-Kredit wurde im Januar 2007 gezogen, der Zinssatz hierfür beträgt 0,15% über dem 3-Monate-LIBOR. Die 3 Mrd. USD-Kreditlinie wurde noch nicht gezogen. Darüber hinaus steht Siemens eine dritte, revolvingende Kreditlinie mit einem Volumen in Höhe von 450 EUR zur Verfügung, die bis September 2012 läuft und von einer lokalen Bank zur Verfügung gestellt wird. Zum 30. September 2010 und 2009 wurden Kreditlinien in Höhe von 6,3 Mrd. EUR nicht in Anspruch genommen. Die Bereitstellungskosten für das Geschäftsjahr 2010 betragen 3,2 EUR und für das Geschäftsjahr 2009 2,7 EUR. Die zugesagten Kreditmittel sind im Rahmen der allgemeinen Geschäftstätigkeit frei verwendbar.

Die Gesamtvolumina an Finanzschulden (ohne die separat gezeigten Verbindlichkeiten aus Finanzierungsleasing) mit Restlaufzeiten von bis zu fünf Jahren und darüber hinaus stellen sich zum 30. September 2010 und 2009 wie folgt dar:

| Geschäftsjahr                                                        | 30. September |               |
|----------------------------------------------------------------------|---------------|---------------|
|                                                                      | 2010          | 2009          |
| 2010                                                                 | –             | 653           |
| 2011                                                                 | 2.368         | 2.243         |
| 2012                                                                 | 2.660         | 2.595         |
| 2013                                                                 | 3.266         | 3.200         |
| 2014                                                                 | 1.108         | 1.112         |
| 2015                                                                 | 689           | –             |
| Nach 2015 im Geschäftsjahr 2010<br>(nach 2014 im Geschäftsjahr 2009) | 9.651         | 9.641         |
|                                                                      | <b>19.742</b> | <b>19.444</b> |

### Sonstige Finanzschulden

Die *Sonstigen Finanzschulden* weisen zum 30. September 2010 einen Betrag von 162 (im Vj. 393) EUR für Grundstücke und Gebäude des Unternehmens aus, die verkauft beziehungsweise übertragen wurden. In Zusammenhang mit diesen Grundstücken und Gebäuden verblieben wesentliche Nutzen und Lasten bei Siemens. Dadurch partizipiert Siemens mittel- und unmittelbar an der Wertänderung der Objekte. Dementsprechend stellte Siemens diese Geschäfte als finanzielle Verpflichtungen dar. Die Grundstücke und Gebäude bilanzierte Siemens weiterhin als Vermögenswerte der Gesellschaft; es wurde weder ein Verkauf bilanziert noch wurde ein Ergebnis realisiert. Für die Immobilientransaktion im Geschäftsjahr 2010 siehe »Ziffer 6«. Zum 30. September 2010 ist in den *Sonstigen Finanzschulden* auch ein Betrag von 0 (im Vj. 337) EUR für ausstehende globale kurzfristige Schuldverschreibungen in USD erfasst.

## Verbindlichkeiten aus Finanzierungsleasing

Zum 30. September 2010 und 2009 stellen sich die Verbindlichkeiten aus Finanzierungsleasing wie folgt dar:

| Fälligkeit                      | 30. September 2010                  |                                 |                                                  | 30. September 2009                  |                                 |                                                  |
|---------------------------------|-------------------------------------|---------------------------------|--------------------------------------------------|-------------------------------------|---------------------------------|--------------------------------------------------|
|                                 | Zukünftige Mindestleasing-zahlungen | Nicht amortisierter Zinsaufwand | Barwert der zukünftigen Mindestleasing-zahlungen | Zukünftige Mindestleasing-zahlungen | Nicht amortisierter Zinsaufwand | Barwert der zukünftigen Mindestleasing-zahlungen |
| Innerhalb eines Jahrs           | 57                                  | 8                               | 49                                               | 54                                  | 9                               | 45                                               |
| Zwischen ein und zwei Jahre     | 21                                  | 3                               | 18                                               | 47                                  | 5                               | 42                                               |
| Zwischen zwei und drei Jahre    | 26                                  | 2                               | 24                                               | 15                                  | 2                               | 13                                               |
| Zwischen drei und vier Jahre    | 7                                   | 2                               | 5                                                | 19                                  | 2                               | 17                                               |
| Zwischen vier und fünf Jahre    | 8                                   | 3                               | 5                                                | 7                                   | 2                               | 5                                                |
| Danach                          | 73                                  | 3                               | 70                                               | 77                                  | 5                               | 72                                               |
| Gesamt                          | 192                                 | 21                              | 171                                              | 219                                 | 25                              | 194                                              |
| Abzüglich: kurzfristiger Anteil |                                     |                                 | - 49                                             |                                     |                                 | - 45                                             |
|                                 |                                     |                                 | <b>122</b>                                       |                                     |                                 | <b>149</b>                                       |

## 24 – Pensionen und ähnliche Verpflichtungen

Siemens gewährt gegenwärtig fast allen Mitarbeitern in Deutschland und vielen Beschäftigten im Ausland Pensionszusagen, die in entsprechenden Pensionsplänen zusammengefasst sind. Um die mit den Pensionsplänen verbundenen Risiken zu vermindern, hat Siemens in den vergangenen Jahren einige wesentliche Pensionspläne zu Plänen umgestaltet, deren Leistungen vorwiegend auf Unternehmensbeiträgen basieren. Zur Finanzierung der Siemens-Pensionsverpflichtungen sind die bedeutendsten Pensionspläne durch Vermögen in externen, zugriffsbeschränkten Versorgungseinrichtungen abgedeckt.

Darüber hinaus gewährt das Unternehmen pensionsähnliche Zusagen, die vor allem aus Übergangszahlungen an Mitarbeiter in Deutschland nach Eintritt in den Ruhestand sowie aus Versorgungsleistungen in Form von Beiträgen zu Kranken- und Lebensversicherungen in den USA und Kanada bestehen. Diese überwiegend nicht durch externes Vermögen finanzierten pensionsähnlichen Verpflichtungen sind nach IFRS als Defined-Benefit-Pläne zu bilanzieren.

Für die Verpflichtungen aus Pensionszusagen und aus pensionsähnlichen Leistungszusagen des Unternehmens resultieren aufgrund der zum 30. September 2010 und 2009 bestehenden Gegebenheiten die folgenden wesentlichen Positionen in der Konzernbilanz:

|                                                                         | 30. September  |                |
|-------------------------------------------------------------------------|----------------|----------------|
|                                                                         | 2010           | 2009           |
| Wesentliche Pensionszusagen                                             | 6.563          | 4.203          |
| Wesentliche pensionsähnliche Leistungszusagen                           | 730            | 639            |
| Sonstige Zusagen                                                        | 1.171          | 1.096          |
| <b>Rückstellung für Pensionen und ähnliche Verpflichtungen</b>          | <b>8.464</b>   | <b>5.938</b>   |
| <b>Abzugrenzende Aufwendungen für Altersversorgung (prepaid costs)</b>  | <b>37</b>      | <b>49</b>      |
| Versicherungsmathematische Gewinne/Verluste                             | - 6.023        | - 3.141        |
| Effekte in Zusammenhang mit der Aktivierungsobergrenze                  | - 145          | - 139          |
| Ertragsteuereffekt                                                      | 1.259          | 425            |
| <b>In der Konzern-Eigenkapitalveränderungsrechnung erfasste Beträge</b> | <b>- 4.909</b> | <b>- 2.855</b> |



Daneben bestehen im Ausland reine Beitragszusagen für Pensionen und ähnliche Zusatzleistungen, beziehungsweise das Unternehmen leistet Beiträge zu sozialen Pensionsfonds im Rahmen rechtlicher Bestimmungen (staatliche Pläne). Da die Verpflichtung des Unternehmens ausschließlich in der Zahlung von Beiträgen besteht, ist die Bilanzierung einer Verpflichtung nicht erforderlich.

Die in der Tabelle genannten *Sonstigen Zusagen* enthalten nicht wesentliche Pensionszusagen, nicht wesentliche pensionsähnliche Leistungszusagen und sonstige langfristige Leistungen nach Beendigung des Arbeitsverhältnisses. Die sonstigen langfristigen Leistungen nach Beendigung des Arbeitsverhältnisses umfassen Leistungen an ehemalige Mitarbeiter, die unabhängig vom Grund des Ausscheidens unmittelbar nach Beendigung des Arbeitsverhältnisses gewährt werden.

### Wesentliche Pensionszusagen

Die wesentlichen Pensionszusagen umfassen 482.000 Anspruchsberechtigte, einschließlich 178.000 aktive Mitarbeiter, 101.000 ehemalige Mitarbeiter mit unverfallbaren Ansprüchen sowie 203.000 Pensionäre und Hinterbliebene. Die Höhe der Versorgungszusagen bemisst sich im Einzelfall nach Lohn- beziehungsweise Gehaltsniveau und/oder Position in der Unternehmenshierarchie sowie der Dauer der Betriebszugehörigkeit. Dabei können die konkreten Versorgungszusagen in Abhängigkeit von den rechtlichen, steuerlichen und wirtschaftlichen Rahmenbedingungen des jeweiligen Landes variieren. Die Mehrheit der aktiven Mitarbeiter von Siemens in Deutschland nimmt an einem im Geschäftsjahr 2004 eingeführten Pensionsplan teil, der BSAV (Beitragsorientierte Siemens Altersversorgung). Die BSAV ist ein durch Vermögen gedeckter Defined-Benefit-Plan, dessen Leistungen überwiegend abhängig sind von den geleisteten Unternehmensbeiträgen und den Investorerträgen auf diese Beiträge, wobei durch das Unternehmen eine Minimalverzinsung garantiert wird. Die BSAV ist über den BSAV Trust e.V. mit Vermögen gedeckt. Im Zuge der Einführung des Pensionsplans BSAV wurde für die Defined-Benefit-Pensionszusagen des Siemens Pension-Trust e.V. der Effekt aus Gehaltssteigerungen weitgehend eliminiert, indem für die Mehrzahl dieser Pensionszusagen keine weiteren Ansprüche mehr verdient werden können.

In den folgenden Abschnitten werden die wesentlichen Pensionszusagen detailliert erläutert in Bezug auf:

- > Pensionsverpflichtungen und Finanzierungsstatus,
- > Bestandteile des periodenbezogenen Nettopensionsaufwands,
- > in der Konzern-Gesamtergebnisrechnung ausgewiesene Beträge,
- > Prämissen für die Berechnung von DBO und periodenbezogenem Nettopensionsaufwand,
- > Sensitivitätsanalysen,
- > Fondsvermögen sowie
- > Pensionszahlungen.

## Pensionszusagen: Pensionsverpflichtungen und Finanzierungsstatus

Der Finanzierungsstatus der wesentlichen Pensionspläne und die Überleitung vom Finanzierungsstatus zu den in der Konzernbilanz ausgewiesenen Beträgen stellen sich wie folgt dar:

|                                                                                                   | 30. September 2010 |                |                | 30. September 2009 |                |                |
|---------------------------------------------------------------------------------------------------|--------------------|----------------|----------------|--------------------|----------------|----------------|
|                                                                                                   | Gesamt             | Inland         | Ausland        | Gesamt             | Inland         | Ausland        |
| Marktwert des Fondsvermögens                                                                      | 23.302             | 14.049         | 9.253          | 21.144             | 13.274         | 7.870          |
| Anwartschaftsbarwert der leistungsorientierten Verpflichtung (»Defined Benefit Obligation« – DBO) | 29.659             | 18.524         | 11.135         | 25.159             | 15.783         | 9.376          |
| <i>durch externes Vermögen gedeckt</i>                                                            | 29.391             | 18.524         | 10.867         | 24.949             | 15.783         | 9.166          |
| <i>nicht durch externes Vermögen gedeckt</i>                                                      | 268                | –              | 268            | 210                | –              | 210            |
| Finanzierungsstatus                                                                               | – 6.357            | – 4.475        | – 1.882        | – 4.015            | – 2.509        | – 1.506        |
| <i>Deutschland</i>                                                                                | – 4.475            | – 4.475        | –              | – 2.509            | – 2.509        | –              |
| <i>USA</i>                                                                                        | – 1.090            | –              | – 1.090        | – 954              | –              | – 954          |
| <i>Großbritannien</i>                                                                             | – 324              | –              | – 324          | – 371              | –              | – 371          |
| <i>Sonstige</i>                                                                                   | – 468              | –              | – 468          | – 181              | –              | – 181          |
| Noch nicht berücksichtigte Aufwendungen / Erträge aus rückwirkenden Planänderungen                | – 92               | –              | – 92           | – 65               | –              | – 65           |
| Effekte aus Aktivierungsobergrenze                                                                | – 103              | –              | – 103          | – 104              | –              | – 104          |
| <b>Bilanzansatz</b>                                                                               | <b>– 6.552</b>     | <b>– 4.475</b> | <b>– 2.077</b> | <b>– 4.184</b>     | <b>– 2.509</b> | <b>– 1.675</b> |
| Der Bilanzansatz setzt sich aus folgenden Bilanzpositionen zusammen:                              |                    |                |                |                    |                |                |
| Sonstige Vermögenswerte                                                                           | 11                 | –              | 11             | 19                 | 17             | 2              |
| Pensionsrückstellungen                                                                            | – 6.563            | – 4.475        | – 2.088        | – 4.203            | – 2.526        | – 1.677        |

Der Marktwert des Fondsvermögens, die DBO und der Finanzierungsstatus zum 30. September 2008 betragen 20.194 EUR, 22.654 EUR und – 2.460 EUR. Zum 30. September 2007 betragen der Marktwert des Fondsvermögens, die DBO und der Finanzierungsstatus 24.013 EUR, 25.052 EUR und – 1.039 EUR. Zum 30. September 2006 beliefen sich der Marktwert des Fondsvermögens, die DBO und der Finanzierungsstatus auf 23.755 EUR, 26.696 EUR und – 2.941 EUR.

In der folgenden Tabelle ist die Entwicklung der DBO im Berichts- und Vorjahr detailliert dargestellt, ergänzt um Einzelangaben nach Ländern:

|                                                                                   | 30. September 2010 |               |               | 30. September 2009 |               |              |
|-----------------------------------------------------------------------------------|--------------------|---------------|---------------|--------------------|---------------|--------------|
|                                                                                   | Gesamt             | Inland        | Ausland       | Gesamt             | Inland        | Ausland      |
| Entwicklung der Defined Benefit Obligation                                        |                    |               |               |                    |               |              |
| Defined Benefit Obligation zu Beginn des Geschäftsjahrs                           | 25.159             | 15.783        | 9.376         | 22.654             | 13.782        | 8.872        |
| Währungseffekte                                                                   | 714                | –             | 714           | – 426              | –             | – 426        |
| Aufwand für im Geschäftsjahr hinzuerworbene Versorgungsansprüche (»Service Cost«) | 489                | 303           | 186           | 451                | 272           | 179          |
| Zinsaufwand (»Interest Cost«)                                                     | 1.327              | 825           | 502           | 1.372              | 853           | 519          |
| Beendigungen und Kürzungen von Plänen                                             | – 305              | – 1           | – 304         | – 50               | – 2           | – 48         |
| Eigenbeiträge der Begünstigten aus dem Plan                                       | 133                | 78            | 55            | 147                | 101           | 46           |
| Rückwirkende Plananpassungen durch Änderung der Versorgungszusagen und Sonstiges  | 56                 | 14            | 42            | 353                | 25            | 328          |
| Versicherungsmathematische Gewinne/Verluste                                       | 3.527              | 2.469         | 1.058         | 2.054              | 1.667         | 387          |
| Akquisitionen                                                                     | 2                  | 1             | 1             | 2                  | 1             | 1            |
| Desinvestitionen                                                                  | – 68               | – 4           | – 64          | – 37               | – 5           | – 32         |
| Pensionszahlungen                                                                 | – 1.375            | – 944         | – 431         | – 1.361            | – 911         | – 450        |
| <b>Defined Benefit Obligation zum Geschäftsjahresende</b>                         | <b>29.659</b>      | <b>18.524</b> | <b>11.135</b> | <b>25.159</b>      | <b>15.783</b> | <b>9.376</b> |
| <i>Deutschland</i>                                                                | 18.524             | 18.524        |               | 15.783             | 15.783        |              |
| <i>USA</i>                                                                        | 4.042              |               | 4.042         | 3.503              |               | 3.503        |
| <i>Großbritannien</i>                                                             | 3.397              |               | 3.397         | 2.859              |               | 2.859        |
| <i>Sonstige</i>                                                                   | 3.696              |               | 3.696         | 3.014              |               | 3.014        |

Von der gesamten DBO zum Geschäftsjahresende entfielen 9.569 EUR auf aktive Mitarbeiter, 3.855 EUR auf ehemalige Mitarbeiter mit unverfallbaren Pensionsansprüchen und 16.235 EUR auf Pensionäre und Hinterbliebene.

Im Geschäftsjahr 2010 erhöhte sich die DBO durch die Absenkung des Abzinsungsfaktors für die inländischen und ausländischen Pensionspläne. Die Position *Beendigungen und Kürzungen von Plänen* in oben stehender Tabelle enthält – 193 EUR aus einer Kürzung von Pensionsplänen in den USA und – 109 EUR als Folge einer teilweisen Beendigung von Pensionsplänen in Kanada. Im Geschäftsjahr 2009 erhöhte sich die DBO durch die Absenkung des Abzinsungsfaktors für die inländischen und ausländischen Pensionspläne. Der negative Effekt aus der Absenkung des Abzinsungsfaktors im Geschäftsjahr 2009 wurde teilweise kompensiert durch eine Absenkung des Renten- und Gehaltstrends sowie durch erfahrungsbedingte Anpassungen.

Die folgende Tabelle verdeutlicht die Entwicklung des Fondsvermögens im Berichts- und Vorjahr, ergänzt um Einzelangaben nach Ländern:

|                                                                   | 30. September 2010 |               |              | 30. September 2009 |               |              |
|-------------------------------------------------------------------|--------------------|---------------|--------------|--------------------|---------------|--------------|
|                                                                   | Gesamt             | Inland        | Ausland      | Gesamt             | Inland        | Ausland      |
| Entwicklung des Fondsvermögens:                                   |                    |               |              |                    |               |              |
| Marktwert des Fondsvermögens zu Beginn des Geschäftsjahrs         | 21.144             | 13.274        | 7.870        | 20.194             | 12.340        | 7.854        |
| Währungseffekte                                                   | 618                | –             | 618          | – 343              | –             | – 343        |
| Erwartete Erträge aus dem Fondsvermögen                           | 1.348              | 840           | 508          | 1.250              | 774           | 476          |
| Versicherungsmathematische Gewinne/Verluste aus dem Fondsvermögen | 936                | 560           | 376          | 656                | 772           | – 116        |
| Akquisitionen und Sonstiges                                       | 51                 | 5             | 46           | 204                | –             | 204          |
| Desinvestitionen und Sonstiges                                    | – 45               | – 2           | – 43         | 6                  | – 3           | 9            |
| Beendigungen von Plänen                                           | – 93               | –             | – 93         | – 12               | –             | – 12         |
| Arbeitgeberbeiträge                                               | 585                | 238           | 347          | 403                | 201           | 202          |
| Eigenbeiträge der Begünstigten aus dem Plan                       | 133                | 78            | 55           | 147                | 101           | 46           |
| Pensionszahlungen                                                 | – 1.375            | – 944         | – 431        | – 1.361            | – 911         | – 450        |
| <b>Marktwert des Fondsvermögens zum Geschäftsjahresende</b>       | <b>23.302</b>      | <b>14.049</b> | <b>9.253</b> | <b>21.144</b>      | <b>13.274</b> | <b>7.870</b> |
| <i>Deutschland</i>                                                | <i>14.049</i>      | <i>14.049</i> |              | <i>13.274</i>      | <i>13.274</i> |              |
| <i>USA</i>                                                        | <i>2.952</i>       |               | <i>2.952</i> | <i>2.549</i>       |               | <i>2.549</i> |
| <i>Großbritannien</i>                                             | <i>3.073</i>       |               | <i>3.073</i> | <i>2.488</i>       |               | <i>2.488</i> |
| <i>Sonstige</i>                                                   | <i>3.228</i>       |               | <i>3.228</i> | <i>2.833</i>       |               | <i>2.833</i> |

Die für das Geschäftsjahr 2011 erwarteten Arbeitgeberbeiträge zu den wesentlichen mit externem Vermögen gedeckten Pensionsplänen betragen 760 EUR, darin 266 EUR zu den inländischen und 494 EUR zu den ausländischen Pensionsplänen.

Die Position *Arbeitgeberbeiträge* im Geschäftsjahr 2010 in oben stehender Tabelle enthält zusätzliche Arbeitgeberbeiträge in Großbritannien. Der Betrag in Höhe von – 93 EUR unter der Position *Beendigungen von Plänen* im Geschäftsjahr 2010 resultiert aus der teilweisen Beendigung von Pensionsplänen in Kanada. Im Geschäftsjahr 2009 hat das Unternehmen einige Pensionspläne in den USA, die mit dem Erwerb des Geschäfts von Dade Behring im Geschäftsjahr 2008 zuzugingen, mit seinen wesentlichen Pensionsplänen verschmolzen. Als Folge davon haben sich die DBO und das Fondsvermögen in den beiden vorangehenden Tabellen um 224 EUR und 128 EUR erhöht. Die entsprechenden Beträge sind in den Positionen *Rückwirkende Plananpassungen durch Änderung der Versorgungszusagen und Sonstiges* und *Akquisitionen und Sonstiges* enthalten.

### Pensionszusagen: Bestandteile des periodenbezogenen Nettopensionsaufwands

Der periodenbezogene Nettopensionsaufwand (Net Periodic Benefit Cost) für die Geschäftsjahre 2010 und 2009 setzt sich wie folgt zusammen:

|                                                                                                    | Geschäftsjahr 2010 |            |           | Geschäftsjahr 2009 |            |            |
|----------------------------------------------------------------------------------------------------|--------------------|------------|-----------|--------------------|------------|------------|
|                                                                                                    | Gesamt             | Inland     | Ausland   | Gesamt             | Inland     | Ausland    |
| Aufwand für im Geschäftsjahr hinzuerworbene Versorgungsansprüche (»Service Cost«)                  | 489                | 303        | 186       | 451                | 272        | 179        |
| Zinsaufwand (»Interest Cost«)                                                                      | 1.327              | 825        | 502       | 1.372              | 853        | 519        |
| Erwartete Rendite des Fondsvermögens                                                               | - 1.348            | - 840      | - 508     | - 1.250            | - 774      | - 476      |
| Tilgung von Aufwendungen/ Erträgen aus rückwirkenden Planänderungen (»Past Service Cost/Benefits«) | 17                 | -          | 17        | 14                 | 17         | - 3        |
| Verluste/ Gewinne aus Beendigungen und Kürzungen von Plänen                                        | - 183              | - 1        | - 182     | - 38               | - 2        | - 36       |
| <b>Periodenbezogener Nettopensionsaufwand</b>                                                      | <b>302</b>         | <b>287</b> | <b>15</b> | <b>549</b>         | <b>366</b> | <b>183</b> |
| <i>Deutschland</i>                                                                                 | 287                | 287        |           | 366                | 366        |            |
| <i>USA</i>                                                                                         | - 51               |            | - 51      | 144                |            | 144        |
| <i>Großbritannien</i>                                                                              | 25                 |            | 25        | 30                 |            | 30         |
| <i>Sonstige</i>                                                                                    | 41                 |            | 41        | 9                  |            | 9          |

Der periodenbezogene Nettopensionsaufwand für das Geschäftsjahr 2010 in oben stehender Tabelle enthält einen Gewinn aus der Kürzung von Plänen in Höhe von 193 EUR resultierend aus dem Einfrieren von Pensionsplänen in den USA. Die Mitarbeiter behalten ihre bereits erworbenen Pensionsansprüche, können jedoch keine weiteren Ansprüche innerhalb dieser Pläne hinzuerwerben. Zum Ausgleich werden Beiträge des Arbeitgebers in bestehende beitragsbezogene Pensionspläne geleistet.

### Pensionszusagen: In der Konzern-Gesamtergebnisrechnung ausgewiesene Beträge

Die versicherungsmathematischen Gewinne und Verluste aus leistungsorientierten Pensionszusagen, die in der Konzern-Gesamtergebnisrechnung ausgewiesen werden, stellen sich für die Geschäftsjahre 2010 und 2009 wie folgt dar:

|                                                                                  | Geschäftsjahr 2010 |              |            | Geschäftsjahr 2009 |            |            |
|----------------------------------------------------------------------------------|--------------------|--------------|------------|--------------------|------------|------------|
|                                                                                  | Gesamt             | Inland       | Ausland    | Gesamt             | Inland     | Ausland    |
| Versicherungsmathematische Gewinne / Verluste                                    | 2.591              | 1.909        | 682        | 1.398              | 895        | 503        |
| Effekte in Zusammenhang mit der Aktivierungsobergrenze                           | - 9                | -            | - 9        | 104                | -          | 104        |
| Ertragsteuereffekt                                                               | - 774              | - 584        | - 190      | - 398              | - 194      | - 204      |
| <b>In der Konzern-Gesamtergebnisrechnung ausgewiesene Beträge (nach Steuern)</b> | <b>1.808</b>       | <b>1.325</b> | <b>483</b> | <b>1.104</b>       | <b>701</b> | <b>403</b> |
| <i>Deutschland</i>                                                               | 1.325              | 1.325        |            | 701                | 701        |            |
| <i>USA</i>                                                                       | 138                |              | 138        | 130                |            | 130        |
| <i>Großbritannien</i>                                                            | 71                 |              | 71         | 268                |            | 268        |
| <i>Sonstige</i>                                                                  | 274                |              | 274        | 5                  |            | 5          |

### Pensionszusagen: Prämissen für die Berechnung von DBO und periodenbezogenem Nettopensionsaufwand

Die der Berechnung der DBO und der Bestimmung der NPBC zugrunde liegenden Annahmen zu Abzinsungsfaktor, Gehalts- und Rententrend sowie zur langfristigen Rendite des Fondsvermögens variieren unter anderem in Abhängigkeit von den wirtschaftlichen Rahmenbedingungen des Landes, in dem der Pensionsplan besteht beziehungsweise die Anlage

des Fondsvermögens erfolgt, sowie von den Kapitalmarkterwartungen.

Der Abzinsungsfaktor (gewichteter Durchschnitt), der der versicherungsmathematischen Berechnung der DBO zum Bilanzstichtag zugrunde liegt, und die erwartete Rendite des Fondsvermögens für das jeweilige Geschäftsjahr stellen sich wie folgt dar:

|                                      | Geschäftsjahr 2010 |        |         | Geschäftsjahr 2009 |        |         |
|--------------------------------------|--------------------|--------|---------|--------------------|--------|---------|
|                                      | Gesamt             | Inland | Ausland | Gesamt             | Inland | Ausland |
| Abzinsungsfaktor                     | 4,2%               | 4,0%   | 4,4%    | 5,3%               | 5,3%   | 5,2%    |
| <i>Deutschland</i>                   | 4,0%               | 4,0%   |         | 5,3%               | 5,3%   |         |
| <i>USA</i>                           | 4,80%              |        | 4,80%   | 5,69%              |        | 5,69%   |
| <i>Großbritannien</i>                | 5,3%               |        | 5,3%    | 5,7%               |        | 5,7%    |
| Erwartete Rendite des Fondsvermögens | 6,4%               | 6,5%   | 6,2%    | 6,5%               | 6,5%   | 6,4%    |
| <i>Deutschland</i>                   | 6,5%               | 6,5%   |         | 6,5%               | 6,5%   |         |
| <i>USA</i>                           | 6,95%              |        | 6,95%   | 6,97%              |        | 6,97%   |
| <i>Großbritannien</i>                | 6,0%               |        | 6,0%    | 6,5%               |        | 6,5%    |

Der gewichtete Gesamtdurchschnitt des Abzinsungsfaktors für das Geschäftsjahr 2008 betrug 6,2%.



Der Gehaltstrend für Länder, in denen diese Prämisse eine wesentliche Wirkung auf die DBO hat, stellt sich für die Geschäftsjahre 2010 und 2009 wie folgt dar: USA: 3,52 % und 3,76 %, Großbritannien: 5,00 % und 4,9 %, Schweiz: 1,5 % und 1,5 %, Niederlande: 2,95 % und 2,95 %. Der Gehaltstrend für die inländischen Pensionspläne für die Geschäftsjahre 2010 und 2009 betrug jeweils 2,25 %. Jedoch wurde im Zuge der Einführung des Pensionsplans BSAV für die Defined-Benefit-Pensionszusagen des Siemens Pension-Trust e.V. der Effekt aus Gehaltssteigerungen weitgehend eliminiert. Der Rententrend für Länder, in denen diese Prämisse eine wesentliche Wirkung auf die DBO zum Bilanzstichtag hat, stellt sich für die Geschäftsjahre 2010 und 2009 wie folgt dar: Deutschland: 1,75 % und 1,75 %, Großbritannien: 3,1 % und 3,0 %, Niederlande: 1,61 % und 1,5 %.

Die für die Berechnung der DBO zum Bilanzstichtag des Vorjahrs angesetzten Prämissen gelten für die Ermittlung des Zinsaufwands (»Interest Cost«) und des Aufwands für die entstehenden Versorgungsansprüche (»Service Cost«) im folgenden Geschäftsjahr. Das für das Geschäftsjahr erwartete absolute Anlageergebnis wird ermittelt auf Basis der erwarteten prozentualen Renditen für das jeweilige Geschäftsjahr, multipliziert mit dem Marktwert des Fondsvermögens zum Bilanzstichtag des vorhergehenden Geschäftsjahrs. Soweit nach dem Bilanzstichtag wesentliche Ereignisse wie Sonderdotierungen stattfinden, werden diese Effekte bei der Berechnung des erwarteten absoluten Anlageergebnisses des Fondsvermögens für das betreffende Geschäftsjahr berücksichtigt.

Die unterstellten Abzinsungsfaktoren spiegeln die Zinssätze wider, die am Bilanzstichtag für erstrangige Industrielanleihen oder Regierungsanleihen mit entsprechender Laufzeit und in entsprechender Währung gezahlt werden. Die Annahmen zur erwarteten Rendite des Fondsvermögens werden auf Basis einer einheitlichen Methode festgelegt, die auf langfristigen tatsächlichen Renditen der Vergangenheit, der Portfoliostruktur und zukünftig zu erwartenden langfristigen Renditen beruht. Für die Geschäftsjahre 2010 und 2009 wurde die Annahme zur erwarteten Rendite des Fondsvermögens im Wesentlichen unverändert beibehalten. Änderungen von oben nicht aufgeführten versicherungsmathematischen Annahmen wie zum Beispiel Fluktuation, Sterblichkeit, Invalidität etc. hatten nur einen geringfügigen Einfluss auf die Gesamt-DBO zum 30. September 2010.

Die erfahrungsbedingten Anpassungen, die aus den Unterschieden zwischen den versicherungsmathematischen Annahmen und den tatsächlich eingetretenen Verhältnissen resultieren, hatten im Geschäftsjahr 2010 keinen Einfluss auf die DBO. Im Geschäftsjahr 2009 verminderten sie die DBO um 0,5 %, erhöhten diese im Geschäftsjahr 2008 um 0,4 % und hatten im Geschäftsjahr 2007 und 2006 keinen Einfluss auf die DBO.

### Pensionszusagen: Sensitivitätsanalysen

Eine Veränderung der oben angegebenen, bereits feststehenden Annahmen für die Ermittlung der NPBC 2011 von jeweils einem Prozentpunkt beziehungsweise eine Veränderung des Marktwerts des Fondsvermögens zum Bilanzstichtag 30. September 2010 um 500 EUR würden die NPBC 2011 folgendermaßen erhöhen beziehungsweise vermindern:

|                                      | Veränderung NPBC 2011 durch einen Prozentpunkt/500 EUR |          |
|--------------------------------------|--------------------------------------------------------|----------|
|                                      | Anstieg                                                | Rückgang |
| Abzinsungsfaktor                     | 47                                                     | - 67     |
| Erwartete Rendite des Fondsvermögens | - 210                                                  | 210      |
| Gehaltstrend                         | 21                                                     | - 20     |
| Rententrend                          | 159                                                    | - 124    |
| Marktwert des Fondsvermögens         | - 32                                                   | 32       |

Bei der Berechnung der DBO wirkt sich eine Veränderung der prozentualen Annahmen zu Abzinsungsfaktor sowie Gehalts- und Rententrend wegen bestimmter finanzmathematischer Effekte (vor allem Effekt aus Zinseszins) nicht linear auf den Absolutbetrag der DBO aus. Aus diesem Grund reagieren auch die aus der DBO abgeleiteten NPBC auf einen Anstieg beziehungsweise Rückgang dieser Annahmen nicht mit dem gleichen Absolutbetrag. Soweit mehrere Annahmen gleichzeitig geändert werden, muss die kumulative Wirkung nicht notwendigerweise die gleiche sein wie bei einer isolierten Änderung nur einer dieser Annahmen.

## Pensionszusagen: Fondsvermögen

Die Portfoliostruktur des Fondsvermögens der wesentlichen Pensionspläne am Bilanzstichtag für die Geschäftsjahre 2010 und 2009 und die unverbindliche Ziel-Portfoliostruktur für das Geschäftsjahr 2011 stellen sich wie folgt dar:

| Vermögenskategorie                         | Ziel-Portfoliostruktur<br>30. September 2011 | Portfoliostruktur des Fondsvermögens |              |              |                    |              |              |
|--------------------------------------------|----------------------------------------------|--------------------------------------|--------------|--------------|--------------------|--------------|--------------|
|                                            |                                              | 30. September 2010                   |              |              | 30. September 2009 |              |              |
|                                            |                                              | Gesamt                               | Inland       | Ausland      | Gesamt             | Inland       | Ausland      |
| Aktien                                     | 20 – 50 %                                    | 27 %                                 | 27 %         | 28 %         | 27 %               | 27 %         | 29 %         |
| Festverzinsliche Wertpapiere               | 40 – 70 %                                    | 62 %                                 | 62 %         | 61 %         | 61 %               | 62 %         | 59 %         |
| Immobilien                                 | 5 – 15 %                                     | 7 %                                  | 6 %          | 9 %          | 9 %                | 8 %          | 9 %          |
| Zahlungsmittel und sonstige Vermögenswerte | 0 – 15 %                                     | 4 %                                  | 5 %          | 2 %          | 3 %                | 3 %          | 3 %          |
|                                            |                                              | <b>100 %</b>                         | <b>100 %</b> | <b>100 %</b> | <b>100 %</b>       | <b>100 %</b> | <b>100 %</b> |

Derivative Finanzinstrumente werden unter der Vermögenskategorie ausgewiesen, deren Risiko durch ein Derivat abgesichert wurde. Die gegenwärtige Portfoliostruktur besteht aus hochqualitativen Regierungsanleihen und ausgewählten Unternehmensanleihen. Siemens überprüft regelmäßig die Vermögensstruktur unter Berücksichtigung der Duration der entsprechenden Pensionsverpflichtungen und analysiert Trends und Marktentwicklungen auf ihren Einfluss auf die Wertentwicklung des Pensionsvermögens, um bereits in einem sehr frühen Stadium entsprechende Gegenmaßnahmen einleiten zu können.

Im Fondsvermögen sind eigene Aktien und Schuldtitel des Unternehmens mit einem Marktwert zum 30. September 2010 und 2009 in Höhe von 68 EUR und 50 EUR enthalten. Zum 30. September 2009 enthielt das Fondsvermögen vom Unternehmen genutzte inländische Immobilien mit einem beizulegenden Zeitwert in Höhe von 274 EUR. Diese Immobilien wurden im Geschäftsjahr 2010 verkauft (siehe »Ziffer 6«).

Die folgende Übersicht stellt die tatsächlichen Gewinne aus dem Fondsvermögen für die Geschäftsjahre 2010 und 2009 dar:

|                                            | Geschäftsjahr 2010 |        |         |
|--------------------------------------------|--------------------|--------|---------|
|                                            | Gesamt             | Inland | Ausland |
| Tatsächliche Gewinne aus dem Fondsvermögen | 2.284              | 1.400  | 884     |

  

|                                            | Geschäftsjahr 2009 |        |         |
|--------------------------------------------|--------------------|--------|---------|
|                                            | Gesamt             | Inland | Ausland |
| Tatsächliche Gewinne aus dem Fondsvermögen | 1.906              | 1.546  | 360     |

Das Fondsvermögen erwirtschaftete in den vergangenen zwölf Monaten eine Rendite von 10,8% beziehungsweise 2.284 EUR, verglichen mit einer erwarteten Rendite von 6,4% beziehungsweise 1.348 EUR. Die erfahrungsbedingte Anpassung auf das Planvermögen betrug im Geschäftsjahr 2010 4,4% (Geschäftsjahr 2009: 3,5%, Geschäftsjahr 2008: – 16,2%, Geschäftsjahr 2007: – 0,9%, Geschäftsjahr 2006: – 0,3%). Die Anlagerendite der inländischen Pensionspläne belief sich auf 1.400 EUR beziehungsweise 10,8%, im Vergleich zu der in den NPBC berücksichtigten erwarteten Rendite von 840 EUR beziehungsweise 6,5%. Die tatsächliche Anlagerendite der ausländischen Pläne betrug 884 EUR beziehungsweise 10,7%, im Vergleich zu einer erwarteten Rendite des Planvermögens von 6,4% beziehungsweise einem Betrag von 508 EUR, der in den NPBC berücksichtigt wurde.

### Pensionszusagen: Pensionszahlungen

Nachfolgende Übersicht enthält die Pensionszahlungen aus den wesentlichen Pensionsplänen im Berichtsjahr und im Vorjahr sowie die in den kommenden fünf Geschäftsjahren und die Summe der in den darauffolgenden fünf Jahren erwarteten Pensionszahlungen (nicht abgezinst):

|                                     | Gesamt | Inland | Ausland |
|-------------------------------------|--------|--------|---------|
| <b>Geleistete Pensionszahlungen</b> |        |        |         |
| 2009                                | 1.361  | 911    | 450     |
| 2010                                | 1.375  | 944    | 431     |
| <b>Erwartete Pensionszahlungen</b>  |        |        |         |
| 2011                                | 1.397  | 941    | 456     |
| 2012                                | 1.436  | 975    | 461     |
| 2013                                | 1.434  | 965    | 469     |
| 2014                                | 1.459  | 979    | 480     |
| 2015                                | 1.481  | 994    | 487     |
| 2016 – 2020                         | 7.749  | 5.153  | 2.596   |

Da die Pensionszahlungen die DBO und das Fondsvermögen in gleicher Höhe vermindern, haben sie keine Auswirkungen auf den Finanzierungsstatus des Unternehmens.

### Wesentliche pensionsähnliche Leistungszusagen

In Deutschland haben Mitarbeiter, die bis zum 30. September 1983 oder früher ein Beschäftigungsverhältnis bei Siemens aufgenommen haben, in den ersten sechs Monaten nach Eintritt in den Ruhestand Anspruch auf einen Übergangszuschuss in Höhe des Differenzbetrags zwischen dem letzten Bruttogehalt und dem Leistungsanspruch aus dem betrieblichen Altersvorsorgeplan. Bestimmte ausländische Konzernunternehmen, insbesondere in den USA und Kanada, bieten pensionsähnliche Leistungszusagen, bezogen auf medizinische und zahnmedizinische Versorgung sowie in Form von Lebensversicherungen. Die Höhe der Verpflichtungen für die pensionsähnlichen Leistungszusagen in Form von medizinischen und zahnmedizinischen Leistungen ist insbesondere abhängig von der erwarteten Kostenentwicklung im Gesundheitssektor. Um einen Anspruch auf medizinische und zahnmedizinische Leistungen zu erwerben, müssen sich die Anspruchsberechtigten an den Versicherungsprämien beteiligen. Die Beiträge der Anspruchsberechtigten beruhen auf spezifischen Bestimmungen zur Kostenbeteiligung, die in den Versorgungsordnungen festgelegt sind. Das Unternehmen hat jederzeit das Recht, die Bestimmungen zur Kostenbeteiligung anzupassen. In der Regel geschieht dies auf einer jährlichen Basis. Die Versicherungsprämien für Lebensversicherungsleistungen werden ausschließlich vom Unternehmen getragen.

In den folgenden Abschnitten werden die wesentlichen pensionsähnlichen Leistungszusagen detailliert erläutert in Bezug auf:

- > Verpflichtungen und Finanzierungsstatus,
- > Fondsvermögen,
- > Bestandteile des periodenbezogenen Nettoaufwands,
- > in der Konzern-Gesamtergebnisrechnung ausgewiesene Beträge,
- > Prämissen für die Berechnung von DBO und periodenbezogenem Nettoaufwand,
- > Sensitivitätsanalysen sowie
- > Leistungszahlungen.

### Pensionsähnliche Leistungszusagen: Verpflichtungen und Finanzierungsstatus

Der Finanzierungsstatus des Fondsvermögens und die Überleitung vom Finanzierungsstatus zu den in der Konzernbilanz ausgewiesenen Beträgen stellen sich wie folgt dar:

|                                                                                                                    | 30. September 2010 |              |              | 30. September 2009 |              |              |
|--------------------------------------------------------------------------------------------------------------------|--------------------|--------------|--------------|--------------------|--------------|--------------|
|                                                                                                                    | Gesamt             | Inland       | Ausland      | Gesamt             | Inland       | Ausland      |
| Marktwert des Fondsvermögens                                                                                       | 4                  | –            | 4            | 3                  | –            | 3            |
| Defined Benefit Obligation                                                                                         | 742                | 338          | 404          | 649                | 307          | 342          |
| <i>durch externes Vermögen gedeckt</i>                                                                             | 278                | –            | 278          | 230                | –            | 230          |
| <i>nicht durch externes Vermögen gedeckt</i>                                                                       | 464                | 338          | 126          | 419                | 307          | 112          |
| Finanzierungsstatus                                                                                                | – 738              | – 338        | – 400        | – 646              | – 307        | – 339        |
| Noch nicht berücksichtigte Aufwendungen / Erträge aus rückwirkenden Planänderungen (»Past Service Cost/Benefits«)  | 8                  | –            | 8            | 7                  | –            | 7            |
| <b>Bilanzansatz (in der Konzernbilanz innerhalb der Rückstellungen für Pensionen und ähnliche Verpflichtungen)</b> | <b>– 730</b>       | <b>– 338</b> | <b>– 392</b> | <b>– 639</b>       | <b>– 307</b> | <b>– 332</b> |

In der folgenden Tabelle ist die Entwicklung der DBO für pensionsähnliche Leistungszusagen des Berichts- und Vorjahrs detailliert dargestellt:

|                                                                                   | 30. September 2010 |            |            | 30. September 2009 |            |            |
|-----------------------------------------------------------------------------------|--------------------|------------|------------|--------------------|------------|------------|
|                                                                                   | Gesamt             | Inland     | Ausland    | Gesamt             | Inland     | Ausland    |
| Entwicklung der Defined Benefit Obligation                                        |                    |            |            |                    |            |            |
| Defined Benefit Obligation zu Beginn des Geschäftsjahrs                           | 649                | 307        | 342        | 650                | 288        | 362        |
| Währungseffekte                                                                   | 25                 | –          | 25         | – 7                | –          | – 7        |
| Aufwand für im Geschäftsjahr hinzuerworbene Versorgungsansprüche (»Service Cost«) | 16                 | 10         | 6          | 15                 | 9          | 6          |
| Zinsaufwand (»Interest Cost«)                                                     | 37                 | 16         | 21         | 41                 | 18         | 23         |
| Beendigungen und Kürzungen von Plänen                                             | – 7                | – 5        | – 2        | – 9                | – 9        | –          |
| Rückwirkende Plananpassungen durch Änderung der Versorgungszusagen und Sonstiges  | 10                 | 16         | – 6        | – 30               | – 1        | – 29       |
| Versicherungsmathematische Gewinne / Verluste                                     | 69                 | 24         | 45         | 50                 | 36         | 14         |
| Akquisitionen                                                                     | –                  | –          | –          | –                  | –          | –          |
| Desinvestitionen                                                                  | –                  | –          | –          | –                  | –          | –          |
| Zahlungen für pensionsähnliche Leistungszusagen                                   | – 57               | – 30       | – 27       | – 61               | – 34       | – 27       |
| <b>Defined Benefit Obligation zum Geschäftsjahresende</b>                         | <b>742</b>         | <b>338</b> | <b>404</b> | <b>649</b>         | <b>307</b> | <b>342</b> |

### Pensionsähnliche Leistungszusagen: Fondsvermögen

Nachfolgende Tabelle verdeutlicht die Entwicklung des Fondsvermögens im Berichts- und Vorjahr:

|                                                             | 30. September 2010 |          |          | 30. September 2009 |          |          |
|-------------------------------------------------------------|--------------------|----------|----------|--------------------|----------|----------|
|                                                             | Gesamt             | Inland   | Ausland  | Gesamt             | Inland   | Ausland  |
| Entwicklung des Fondsvermögens:                             |                    |          |          |                    |          |          |
| Marktwert des Fondsvermögens zu Beginn des Geschäftsjahrs   | 3                  | –        | 3        | 3                  | –        | 3        |
| Tatsächliche Erträge aus dem Fondsvermögen                  | 1                  | –        | 1        | –                  | –        | –        |
| Arbeitgeberbeiträge                                         | 27                 | –        | 27       | 27                 | –        | 27       |
| Zahlungen für pensionsähnliche Leistungszusagen             | – 27               | –        | – 27     | – 27               | –        | – 27     |
| <b>Marktwert des Fondsvermögens zum Geschäftsjahresende</b> | <b>4</b>           | <b>–</b> | <b>4</b> | <b>3</b>           | <b>–</b> | <b>3</b> |

### Pensionsähnliche Leistungszusagen: Bestandteile des periodenbezogenen Nettoaufwands

Der periodenbezogene Nettoaufwand für pensionsähnliche Leistungszusagen für die Geschäftsjahre 2010 und 2009 setzt sich wie folgt zusammen:

|                                                                                                                               | Geschäftsjahr 2010 |           |           | Geschäftsjahr 2009 |           |            |
|-------------------------------------------------------------------------------------------------------------------------------|--------------------|-----------|-----------|--------------------|-----------|------------|
|                                                                                                                               | Gesamt             | Inland    | Ausland   | Gesamt             | Inland    | Ausland    |
| Aufwand für im Geschäftsjahr hinzugeworbene Versorgungsansprüche (»Service Cost«)                                             | 16                 | 10        | 6         | 15                 | 9         | 6          |
| Zinsaufwand (»Interest Cost«)                                                                                                 | 37                 | 16        | 21        | 41                 | 18        | 23         |
| Tilgung von noch nicht berücksichtigten Aufwendungen/Erträgen aus rückwirkenden Planänderungen (»Past Service Cost/Benefits«) | 1                  | –         | 1         | – 30               | –         | – 30       |
| Verluste/Gewinne aus Beendigungen und Kürzungen von Plänen                                                                    | – 7                | – 5       | – 2       | – 9                | – 9       | –          |
| <b>Periodenbezogener Nettoaufwand für pensionsähnliche Leistungszusagen</b>                                                   | <b>47</b>          | <b>21</b> | <b>26</b> | <b>17</b>          | <b>18</b> | <b>– 1</b> |

### Pensionsähnliche Leistungszusagen: In der Konzern-Gesamtergebnisrechnung ausgewiesene Beträge

Die versicherungsmathematischen Gewinne und Verluste aus pensionsähnlichen Leistungszusagen, die in der Konzern-Gesamtergebnisrechnung ausgewiesen werden, stellen sich für die Geschäftsjahre 2010 und 2009 wie folgt dar:

|                                                                                  | Geschäftsjahr 2010 |           |           | Geschäftsjahr 2009 |           |          |
|----------------------------------------------------------------------------------|--------------------|-----------|-----------|--------------------|-----------|----------|
|                                                                                  | Gesamt             | Inland    | Ausland   | Gesamt             | Inland    | Ausland  |
| Versicherungsmathematische Gewinne / Verluste                                    | 69                 | 24        | 45        | 50                 | 36        | 14       |
| Ertragsteuereffekt                                                               | - 24               | - 7       | - 17      | - 16               | - 11      | - 5      |
| <b>In der Konzern-Gesamtergebnisrechnung ausgewiesene Beträge (nach Steuern)</b> | <b>45</b>          | <b>17</b> | <b>28</b> | <b>34</b>          | <b>25</b> | <b>9</b> |
| <i>Deutschland</i>                                                               | 17                 | 17        |           | 25                 | 25        |          |
| <i>USA</i>                                                                       | 21                 |           | 21        | 8                  |           | 8        |
| <i>Kanada</i>                                                                    | 7                  |           | 7         | 1                  |           | 1        |

### Pensionsähnliche Leistungszusagen: Prämissen für die Berechnung von DBO und periodenbezogenem Nettoaufwand für pensionsähnliche Leistungszusagen

Für die Übergangszahlungen in Deutschland sind die Abzinsungsfaktoren und andere wesentliche Prämissen maßgeblich, die auch für die Berechnung der inländischen Pensionszusagen verwendet werden.

Der versicherungsmathematischen Wertberechnung für Kranken- und Lebensversicherungsleistungen liegen folgende Annahmen (gewichteter Durchschnitt) zugrunde:

|                                                                      | Geschäftsjahr 2010 | Geschäftsjahr 2009 |
|----------------------------------------------------------------------|--------------------|--------------------|
| Abzinsungsfaktor                                                     | 4,81 %             | 5,66 %             |
| <b>USA:</b>                                                          |                    |                    |
| Trendannahmen medizinischer Versorgung (erstes / letztes / Jahr):    |                    |                    |
| Nicht-Gesundheitsversorgungs-Berechtigte unter 65                    | 8,0 % / 5 % / 2017 | 8,5 % / 5 % / 2017 |
| Gesundheitsversorgungs-Berechtigte über 65                           | 8,5 % / 5 % / 2018 | 9 % / 5 % / 2018   |
| Trendannahmen zahnmedizinischer Versorgung (erstes / letztes / Jahr) | 6 % / 5 % / 2021   | 6 % / 5 % / 2021   |
| <b>Kanada:</b>                                                       |                    |                    |
| Trendannahmen medizinischer Versorgung                               | 5,00 %             | 5,00 %             |
| Trendannahmen medikamentöser Versorgung                              | 5 %                | 7 % / 5 % / 2010   |
| Trendannahmen zahnmedizinischer Versorgung                           | 4,00 %             | 4,00 %             |



Die erfahrungsbedingten Anpassungen, die aus den Unterschieden zwischen den versicherungsmathematischen Annahmen und den tatsächlich eingetretenen Verhältnissen resultieren, erhöhten die DBO im Geschäftsjahr 2010 um 0,5% und verminderten die DBO im Geschäftsjahr 2009 um 1,6%, im Geschäftsjahr 2008 um 0,9%, im Geschäftsjahr 2007 um 0,3% und im Geschäftsjahr 2006 um 1,5%.

### Pensionsähnliche Leistungszusagen: Sensitivitätsanalysen

Die Rechenparameter können maßgeblich von den Trendannahmen zur Kostenentwicklung im Gesundheitssektor beeinflusst werden. Eine Veränderung dieser Annahmen um einen Prozentpunkt hätte zum Geschäftsjahresende 2010 folgende Erhöhung/Verminderung der DBO sowie des Aufwands für die im Geschäftsjahr hinzuerworbenen Ansprüche und die Aufzinsung der bereits erworbenen Ansprüche zur Folge gehabt:

|                                                                                                                | 30. September 2010<br>ein Prozentpunkt |         |
|----------------------------------------------------------------------------------------------------------------|----------------------------------------|---------|
|                                                                                                                | Erhöhung                               | Senkung |
| Veränderung des Anwartschaftsbarwerts der leistungsorientierten Verpflichtung (»Defined Benefit Obligation«)   | 17                                     | - 14    |
| Summe der Veränderungen des Aufwands für die im Geschäftsjahr hinzuerworbenen Ansprüche und für die Aufzinsung | 1                                      | - 1     |

### Pensionsähnliche Leistungszusagen: Zahlungen

Nachfolgende Übersicht enthält die Zahlungen für pensionsähnliche Leistungen im Geschäftsjahr 2010 und im Vorjahr sowie die in den kommenden fünf Geschäftsjahren und die Summe der in den darauffolgenden fünf Jahren erwarteten Zahlungen für pensionsähnliche Leistungen (nicht abgezinst):

|                                                            | Gesamt | Inland | Ausland |
|------------------------------------------------------------|--------|--------|---------|
| <b>Zahlungen für pensionsähnliche Leistungen</b>           |        |        |         |
| 2009                                                       | 61     | 34     | 27      |
| 2010                                                       | 57     | 30     | 27      |
| <b>Erwartete Zahlungen für pensionsähnliche Leistungen</b> |        |        |         |
| 2011                                                       | 66     | 38     | 28      |
| 2012                                                       | 57     | 29     | 28      |
| 2013                                                       | 53     | 25     | 28      |
| 2014                                                       | 58     | 31     | 27      |
| 2015                                                       | 65     | 37     | 28      |
| 2016 – 2020                                                | 342    | 203    | 139     |

Da die Verpflichtungen für pensionsähnliche Leistungszusagen in der Regel nicht durch externes Vermögen abgedeckt sind, führen die Zahlungen zu einem entsprechenden Mittelabfluss im Unternehmen.

### Rückstellung für sonstige Zusagen für Pensionen und ähnliche Verpflichtungen

Die Rückstellung für sonstige Zusagen für Pensionen und ähnliche Verpflichtungen für die Geschäftsjahre 2010 und 2009 umfasst Rückstellungen bezüglich nicht wesentlicher Pläne für nicht durch externes Vermögen gedeckte Zusagen in Höhe von 923 EUR und 868 EUR sowie Rückstellungen für durch externes Vermögen gedeckte Zusagen in Höhe von 248 EUR und 228 EUR.

Die NPBC für sonstige Zusagen für Pensionen und ähnliche Verpflichtungen für die Geschäftsjahre 2010 und 2009 setzen sich wie folgt zusammen:

|                                                                                                   | Geschäftsjahr 2010 |           |           | Geschäftsjahr 2009 |           |            |
|---------------------------------------------------------------------------------------------------|--------------------|-----------|-----------|--------------------|-----------|------------|
|                                                                                                   | Gesamt             | Inland    | Ausland   | Gesamt             | Inland    | Ausland    |
| Aufwand für im Geschäftsjahr hinzuerworbene Versorgungsansprüche (»Service Cost«)                 | 58                 | 2         | 56        | 65                 | 4         | 61         |
| Zinsaufwand (»Interest Cost«)                                                                     | 96                 | 20        | 76        | 117                | 24        | 93         |
| Erwartete Rendite des Fondsvermögens                                                              | - 48               | - 1       | - 47      | - 53               | - 1       | - 52       |
| Tilgung von Aufwendungen/Erträgen aus rückwirkenden Planänderungen (»Past Service Cost/Benefits«) | 4                  | -         | 4         | 5                  | 1         | 4          |
| Verluste/Gewinne aus Beendigungen und Kürzungen von Plänen                                        | - 45               | -         | - 45      | 2                  | - 7       | 9          |
| <b>Periodenbezogener Nettopensionsaufwand</b>                                                     | <b>65</b>          | <b>21</b> | <b>44</b> | <b>136</b>         | <b>21</b> | <b>115</b> |

### Beitragsorientierte Pläne und staatliche Pläne (fortgeführte Aktivitäten)

Die ergebniswirksam erfassten Beiträge zu den beitragsorientierten Plänen (*Defined-Contribution-Plans*) beliefen sich im Geschäftsjahr 2010 auf 352 EUR gegenüber 382 EUR im Geschäftsjahr 2009 und 314 EUR im Geschäftsjahr 2008. Die Beiträge zu staatlichen Plänen betragen 1.604 EUR im Geschäftsjahr 2010, 1.640 EUR im Geschäftsjahr 2009 sowie 1.615 EUR im Geschäftsjahr 2008.

## 25 – Rückstellungen

|                                                                               | Gewährleistungen | Auftragsbezogene Rückstellungen für Drohverluste und Risiken | Rückbau-, Stilllege- und ähnliche Verpflichtungen | Sonstige     | Summe        |
|-------------------------------------------------------------------------------|------------------|--------------------------------------------------------------|---------------------------------------------------|--------------|--------------|
| Stand am 1. Oktober 2009                                                      | 3.000            | 1.662                                                        | 816                                               | 1.484        | 6.962        |
| Zugänge                                                                       | 1.797            | 1.129                                                        | 1                                                 | 851          | 3.778        |
| Verbrauch                                                                     | - 718            | - 526                                                        | - 10                                              | - 283        | - 1.537      |
| Auflösungen                                                                   | - 554            | - 286                                                        | - 62                                              | - 297        | - 1.199      |
| Währungsumrechnung                                                            | 70               | 31                                                           | 2                                                 | 41           | 144          |
| Aufwand aus der Aufzinsung und Effekte aus der Änderung des Abzinsungsfaktors | 2                | 6                                                            | 295                                               | 7            | 310          |
| Sonstige Veränderungen                                                        | - 6              | 1                                                            | 11                                                | 6            | 12           |
| <b>Stand am 30. September 2010</b>                                            | <b>3.591</b>     | <b>2.017</b>                                                 | <b>1.053</b>                                      | <b>1.809</b> | <b>8.470</b> |
| <i>davon langfristig</i>                                                      | <i>1.103</i>     | <i>642</i>                                                   | <i>1.033</i>                                      | <i>554</i>   | <i>3.332</i> |

|                                                                               | Gewährleistungen | Auftragsbezogene Rückstellungen für Drohverluste und Risiken | Rückbau-, Stilllege- und ähnliche Verpflichtungen | Sonstige     | Summe        |
|-------------------------------------------------------------------------------|------------------|--------------------------------------------------------------|---------------------------------------------------|--------------|--------------|
| Stand am 1. Oktober 2008                                                      | 2.744            | 1.705                                                        | 682                                               | 2.567        | 7.698        |
| Zugänge                                                                       | 1.508            | 948                                                          | 3                                                 | 719          | 3.178        |
| Verbrauch                                                                     | - 713            | - 630                                                        | - 29                                              | - 1.457      | - 2.829      |
| Auflösungen                                                                   | - 485            | - 300                                                        | - 6                                               | - 389        | - 1.180      |
| Währungsumrechnung                                                            | - 23             | - 33                                                         | - 1                                               | - 12         | - 69         |
| Aufwand aus der Aufzinsung und Effekte aus der Änderung des Abzinsungsfaktors | 4                | 15                                                           | 161                                               | 10           | 190          |
| Sonstige Veränderungen                                                        | - 35             | - 43                                                         | 6                                                 | 46           | - 26         |
| <b>Stand am 30. September 2009</b>                                            | <b>3.000</b>     | <b>1.662</b>                                                 | <b>816</b>                                        | <b>1.484</b> | <b>6.962</b> |
| <i>davon langfristig</i>                                                      | 861              | 551                                                          | 793                                               | 566          | 2.771        |

Mit Ausnahme von Rückbau-, Stilllege- und ähnlichen Verpflichtungen (siehe Ausführungen unten) erwartet Siemens für die Mehrheit der Rückstellungen, dass sie in der Regel innerhalb der nächsten ein bis 15 Jahre zahlungswirksam werden.

Die *Gewährleistungen* beziehen sich im Wesentlichen auf veräußerte Produkte. Weitere Informationen zu den Grundlagen der Ermittlung von Gewährleistungsrückstellungen finden sich unter »Ziffer 2, Produktbezogene Aufwendungen und drohende Verluste aus Aufträgen«.

Die *Auftragsbezogenen Rückstellungen für Drohverluste und Risiken* bildet Siemens für erwartete Verluste aus nicht beendeten Auftragsfertigungsprojekten, Verkaufs- sowie Leasingverträgen.

*Rückbau-, Stilllege- und ähnliche Verpflichtungen* – Das Unternehmen hat bei bestimmten Gegenständen des Sachanlagevermögens Rückbau-, Stilllege- und ähnliche Verpflichtungen. Diese stehen überwiegend in Zusammenhang mit Sanierungskosten sowie mit Kosten für Rückbauverpflichtungen gemieteter Grundstücke und Gebäude. Die Verpflichtungen in Zusammenhang mit den Sanierungskosten betragen zum 30. September 2010 1.004 (im Vj. 780) EUR. Davon entfielen zum 30. September 2010 992 (im Vj. 764) EUR auf den langfristigen Anteil. Die Verpflichtungen in Zusammenhang mit Kosten für Rückbauverpflichtungen gemieteter Grundstücke

und Gebäude betragen zum 30. September 2010 49 (im Vj. 36) EUR. Davon entfielen zum 30. September 2010 41 (im Vj. 29) EUR auf den langfristigen Anteil.

Die Sanierungskosten ergeben sich auf Basis der geschätzten Dekontaminations- und Umweltschutzverpflichtungen für die Stilllegung der Anlagen in Hanau (Werk Hanau) sowie für ein nukleares Forschungs- und Dienstleistungszentrum in Karlstein (Werk Karlstein), die Uran- und Mischoxidbrennelemente fertigen. Nach dem deutschen Atomgesetz muss der radioaktive Abfall bei der Stilllegung solcher Produktionsanlagen entsorgt und in ein staatlich bewilligtes Endlager verbracht werden. Vor diesem Hintergrund arbeitete das Unternehmen folgenden Stufenplan für die Stilllegung der Werke in Hanau und Karlstein aus: Reinigung, Dekontamination und Demontage des technischen Geräts und der Anlagen, Dekontamination der Betriebsräume und Gebäude, gesonderte Erfassung des radioaktiven Materials sowie Zwischen- und Endlagerung des radioaktiven Abfalls. Außerdem sind begleitend kontinuierliche technische Studien geplant sowie die Entnahme von Proben des radioaktiven Materials unter der Aufsicht von Bundes- und Länderbehörden. Dekontamination, Demontage und Abfalltrennung sollen bis 2015 fortgeführt werden. Danach hat das Unternehmen für die Lagerung des radioaktiven Abfalls in einem Zwischenlager zu sorgen, bis ein Endlager zur Verfügung steht. In Bezug auf das Werk Hanau ist der Prozess hinsichtlich der Einrichtung eines Zwischenlagers für radioaktiven Abfall fast abgeschlossen. Am 21. September

2006 hat die Gesellschaft eine offizielle Benachrichtigung von den Behörden erhalten, dass das Werk Hanau von der Anwendung des deutschen Atomgesetzes befreit wurde und dass die weitere Nutzung unbeschränkt ist. Die genaue Höhe der Dekontaminationskosten wird letztlich davon abhängen, für welches Endlager sich die Bundesregierung entscheiden wird und wann es zur Verfügung stehen wird. Daher liegt dem Ansatz der Rückstellung eine Reihe von Schätzungen und Annahmen zugrunde.

Im Geschäftsjahr 2010 wurden verschiedene Parameter für die Errichtung eines Endlagers für radioaktiven Abfall im Hinblick auf das Endlager »Schacht Konrad« festgelegt. Unter Berücksichtigung der Einschätzungen eines unabhängigen Sachverständigen hat das Unternehmen die Bewertung der Verpflichtung im Geschäftsjahr 2010 aktualisiert. Die Bewertung berücksichtigt überarbeitete Annahmen, die aktuellere und detailliertere Kostenschätzungen, Preissteigerungsraten und Abzinsungssätze widerspiegeln sowie eine Verteilung der künftigen Zahlungsmittelabflüsse über einen längeren Zeitraum beinhalten. In der Bewertung zum 30. September 2009 wurde im Wesentlichen von einer einmaligen Abschlagszahlung im Jahr 2033 für die Endlagerung ausgegangen. In den überarbeiteten Annahmen vom dritten Quartal des Geschäftsjahrs 2010 wird hingegen von durchgehenden Zahlungsmittelabflüssen bis zum Jahr 2084 für Rückbau, Zwischen- und Endlagerung ausgegangen. Aus der Anpassung der Schätzparameter resultierte eine Reduzierung der Rückstellung um 60 EUR.

Bei der Bestimmung von Rückstellungen für wesentliche Rückbau-, Stilllege- und ähnliche Verpflichtungen werden auch weiterhin erhebliche Schätzungen und Annahmen getroffen. Unsicherheiten hinsichtlich des anzusetzenden Betrags umfassen zum Beispiel die geschätzten Kosten der Stilllegung aufgrund des langen Zeitraums, für den die künftigen Zahlungsmittelabflüsse erwartet werden, sowie die zugehörige Aufzinsung. Die geschätzten Zahlungsmittelabflüsse könnten sich unter anderem dann wesentlich ändern, wenn die Pläne der Regierung, das Endlager »Schacht Konrad« bereitzustellen, durch politische Entwicklungen beeinflusst werden. Ein weiterer Einflussfaktor bei den geschätzten Kosten ist die Gesetzgebung zur Laufzeit von deutschen Atomkraftwerken, wodurch die zeitliche Planung der Zwischen- und Endlagerung des radioaktiven Materials sowie der Bedarf an Lagerkapazität beeinflusst werden können.

Zum Geschäftsjahresende 2010 beziehungsweise 2009 beliefen sich die Rückstellungen auf 1.004 EUR beziehungsweise 780 EUR. Ausgewiesen werden diese abzüglich eines Barwertabschlags von 1.924 EUR beziehungsweise 1.163 EUR. Insgesamt werden für die nächsten fünf Jahre und danach Zahlungen in Höhe von 30 EUR, 28 EUR, 29 EUR, 25 EUR, 25 EUR und 2.791 EUR erwartet, die 2.412 EUR für die erwarteten Kosten in Verbindung mit der Endlagerung im Jahr 2033 enthalten.

Das Unternehmen zinst die Rückbau-, Stilllege- und ähnlichen Verpflichtungen nach der Effektivzinsmethode auf. Dabei verwendet es die zum Bilanzstichtag gültigen Zinssätze. Für das Geschäftsjahr 2010 beziehungsweise 2009 wies Siemens einen Aufzinsungsaufwand von 30 EUR beziehungsweise 33 EUR in der Position *Sonstiges Finanzergebnis* aus. Änderungen der Abzinsungsfaktoren erhöhten den Buchwert der Rückstellung um 265 EUR beziehungsweise 128 EUR zum 30. September 2010 beziehungsweise 2009.

## 26 – Sonstige Verbindlichkeiten

|                                          | 30. September |              |
|------------------------------------------|---------------|--------------|
|                                          | 2010          | 2009         |
| Verbindlichkeiten gegenüber Mitarbeitern | 685           | 815          |
| Umsatzabgrenzung                         | 274           | 194          |
| Sonstiges                                | 1.321         | 1.013        |
|                                          | <b>2.280</b>  | <b>2.022</b> |

## 27 – Eigenkapital

### Grundkapital

Das Grundkapital der Siemens AG lautet auf nennwertlose Stückaktien, auf die ein anteiliges rechnerisches Grundkapital in Höhe von 3,00 EUR je Aktie entfällt. Jede Aktie hat eine Stimme.

Die folgende Tabelle enthält eine Zusammenfassung des Grundkapitals und Änderungen des Genehmigten und Bedingten Kapitals für die Geschäftsjahre 2010 und 2009:

|                                    | Grundkapital<br>(genehmigt und ausgegeben) |                   | Genehmigtes Kapital<br>(nicht ausgegeben) |                   | Bedingtes Kapital<br>(nicht ausgegeben) |                            |
|------------------------------------|--------------------------------------------|-------------------|-------------------------------------------|-------------------|-----------------------------------------|----------------------------|
|                                    | in Tsd.<br>EUR                             | in Tsd.<br>Aktien | in Tsd.<br>EUR                            | in Tsd.<br>Aktien | in Tsd.<br>EUR                          | in Tsd.<br>Aktien          |
| <b>Stand am 30. September 2008</b> | <b>2.742.610</b>                           | <b>914.203</b>    | <b>671.130</b>                            | <b>223.710</b>    | <b>860.002<sup>1</sup></b>              | <b>286.667<sup>1</sup></b> |
| Verfallenes Kapital                | –                                          | –                 | – 600.000                                 | – 200.000         | – 702.485                               | – 234.161                  |
| Neu genehmigtes Kapital            | –                                          | –                 | 520.800                                   | 173.600           | 600.000                                 | 200.000                    |
| <b>Stand am 30. September 2009</b> | <b>2.742.610</b>                           | <b>914.203</b>    | <b>591.930</b>                            | <b>197.310</b>    | <b>757.517<sup>1</sup></b>              | <b>252.506<sup>1</sup></b> |
| Verfallenes oder gelöscht Kapital  | –                                          | –                 | –                                         | –                 | – 600.000                               | – 200.000                  |
| Neu genehmigtes Kapital            | –                                          | –                 | –                                         | –                 | 600.000                                 | 200.000                    |
| <b>Stand am 30. September 2010</b> | <b>2.742.610</b>                           | <b>914.203</b>    | <b>591.930</b>                            | <b>197.310</b>    | <b>757.517<sup>1</sup></b>              | <b>252.506<sup>1</sup></b> |

<sup>1</sup> Aufgrund von Rundungen können die angegebenen Werte vom rechnerischen Summenwert abweichen.

### Genehmigtes Kapital (nicht ausgegeben)

Die Hauptversammlung ermächtigte den Vorstand mit Zustimmung des Aufsichtsrats, das Grundkapital durch die Ausgabe von nennwertlosen Namensaktien zu erhöhen und den weiteren Inhalt der Aktienrechte und die Bedingungen der Aktienaussgabe wie folgt festzulegen:

- Das Genehmigte Kapital 2009 beläuft sich auf bis zu 520,8 EUR durch Ausgabe von bis zu 173,6 Mio. neuer Aktien gegen Bar- und/oder Sacheinlage (Genehmigtes Kapital 2009). Die Ermächtigung wurde am 27. Januar 2009 beschlossen und erlischt am 26. Januar 2014. Es ersetzte das Genehmigte Kapital 2004, siehe c).
- Das Genehmigte Kapital 2006 beläuft sich auf bis zu 75 EUR durch die Ausgabe von bis zu 25 Mio. neuer Aktien gegen Bareinlage. Die Ermächtigung wurde am 26. Januar 2006 beschlossen und erlischt am 25. Januar 2011. Zum 30. September 2010 und 2009 standen noch 71,1 EUR zur Ausgabe zur Verfügung. Dies entspricht 23,71 Mio. Aktien.

- Das Genehmigte Kapital 2004 ist am 21. Januar 2009 verfallen. Es ermächtigte zur Erhöhung des Grundkapitals auf bis zu 600 EUR durch die Ausgabe von bis zu 200 Mio. Aktien gegen Bar- und/oder Sacheinlage.

Im Rahmen des Genehmigten Kapitals 2009 und 2004 kann der Vorstand mit Zustimmung des Aufsichtsrats das Bezugsrecht der Aktionäre bei Kapitalerhöhungen gegen Sacheinlagen und unter definierten Voraussetzungen auch bei Bareinlagen ausschließen.

Entsprechend dem Genehmigten Kapital 2006 und dem Genehmigten Kapital 2004 können neue Aktien lediglich den Mitarbeitern der Gesellschaft und ihrer Konzerngesellschaften angeboten werden, soweit diese Konzerngesellschaften nicht selbst börsennotiert sind und kein eigenes Mitarbeiteraktienprogramm haben. Bezugsrechte der Aktionäre sind dabei ausgeschlossen.

### Bedingtes Kapital (nicht ausgegeben)

Das Bedingte Kapital steht für a) die Ausgabe von Schuldverschreibungen mit Wandlungsrecht und/oder Optionsrechten, b) die Bedienung bei Ausübung der Aktienoptionspläne und c) die Abfindung ehemaliger Aktionäre der Siemens Nixdorf Informationssysteme AG (SNI AG) zur Verfügung.

- a) Das Bedingte Kapital für die Ausgabe von Schuldverschreibungen mit Wandlungsrecht und/oder Optionsrechten mit einem Gesamtbetrag von bis zu 15 Mrd. EUR gewährt den Inhabern das Bezugsrecht auf bis zu 200 Mio. Aktien ohne Nennbetrag, was einem Grundkapital von bis zu 600 EUR entspricht (Bedingtes Kapital 2010). Die Ermächtigung zur Ausgabe solcher Schuldverschreibungen wurde am 26. Januar 2010 beschlossen und erlischt am 25. Januar 2015. Das Bedingte Kapital 2009 wurde durch das Bedingte Kapital 2010 ersetzt, siehe e).
- b) Das Bedingte Kapital zur Bedienung der Aktienoptionspläne 2001 und 1999 belief sich zum 30. September 2010 und 2009 jeweils auf 157 EUR beziehungsweise 52,32 Mio. Aktien der Siemens AG. Von den 157 EUR Bedingtem Kapital stehen 147 EUR beziehungsweise 49 Mio. Aktien nur für den Aktienoptionsplan 2001 zur Verfügung. 10 EUR beziehungsweise 3,32 Mio. Aktien stehen für beide Aktienoptionspläne 2001 und 1999 zur Verfügung. Die letzte Tranche der Aktienoptionen läuft im November 2010 aus und ab diesem Termin werden keine weiteren Aktien ausgegeben. Für weitere Informationen zu Aktienoptionen siehe »Ziffer 34«.
- c) Das Bedingte Kapital zur Ausgabe von Aktien für die Abfindung ehemaliger Aktionäre der SNI AG, die ihre SNI AG-Aktienurkunden noch nicht eingereicht haben, belief sich zum 30. September 2010 und 2009 jeweils auf 0,6 EUR beziehungsweise 189 Tsd. Aktien. Die Ansprüche dieser Aktionäre auf Aktien der Siemens AG sind 2007 verjährt, sodass keine weiteren Aktien der Siemens AG ausgegeben werden müssen.
- d) Das Bedingte Kapital 2004 ist am 21. Januar 2009 verfallen. Es stand für die Bedienung von Schuldverschreibungen mit Wandlungsrechten und/oder Optionsrechten zur Verfügung und betrug zum 30. September 2008 702 EUR oder 234,2 Mio. Aktien der Siemens AG. Die Hauptversammlung hatte den Vorstand im Geschäftsjahr 2004 ermächtigt, Schuldverschreibungen mit Wandlungsrechten oder Optionsrechten im Gesamtnennbetrag von bis zu 11.250 EUR zu begeben.

- e) Das Bedingte Kapital 2009 wurde durch das Bedingte Kapital 2010 ersetzt, siehe a). Es stand für die Ausgabe von Schuldverschreibungen mit Wandlungsrechten und/oder Optionsrechten in Höhe von 600 EUR zur Verfügung. Dies entsprach 200 Mio. neuen Aktien.

### Eigene Aktien

Die Gesellschaft wurde durch die Aktionäre ermächtigt, eigene Aktien bis zu insgesamt 91.420.342 Stück zu erwerben. Der Beschluss wurde am 1. März 2010 wirksam und bleibt bis zum 25. Juli 2011 in Kraft. Die vorherige Ermächtigung, bis zu 91.420.342 Aktien erwerben zu können, wurde mit dem Tag der Wirksamkeit des neuen Beschlusses ersetzt. Die vorherige Ermächtigung wurde am 27. Januar 2009 verabschiedet und galt bis zum 26. Juli 2010. Entsprechend dem bestehenden Beschluss können zurückgekaufte Aktien (i) über eine Börse oder über ein allgemeines Angebot an die Siemens-Aktionäre verkauft werden; (ii) eingezogen werden; (iii) für die Erfüllung von Verpflichtungen aus dem Aktienoptionsplan 2001 verwendet werden; (iv) Personen, die in einem Arbeitsverhältnis zu der Gesellschaft oder Tochterunternehmen stehen oder standen, zum Erwerb angeboten oder solchen Personen mit einer Haltefrist von nicht weniger als zwei Jahren zugesagt und übertragen werden; (v) Dritten mit Zustimmung des Aufsichtsrats gegen Sacheinlage zum Erwerb angeboten und übertragen werden, insbesondere in Zusammenhang mit Unternehmenszusammenschlüssen oder dem Erwerb von Unternehmen oder Anteilen daran; (vi) mit Zustimmung des Aufsichtsrats an Dritte gegen Barmittel veräußert werden, wenn der Kaufpreis (ohne dabei anfallende Transaktionskosten) nicht wesentlich geringer als der Marktpreis der Siemens-Aktie am jeweiligen Handelstag ist, ermittelt in der Eröffnungsauktion der Xetra-Handelsplattform (oder eines vergleichbaren Nachfolgesystems); oder (vii) zur Erfüllung von Wandel- und Optionsrechten, die die Gesellschaft oder Tochterunternehmen einräumten, verwendet werden. Außerdem wurde der Aufsichtsrat ermächtigt, von der Gesellschaft erworbene eigene Aktien den Mitgliedern des Vorstands der Gesellschaft unter den gleichen Konditionen wie den Mitarbeitern der Gesellschaft zum Erwerb im Rahmen einer aktienbasierten Vergütung anzubieten oder mit einer Haltefrist von nicht weniger als zwei Jahren zuzusagen und zu übertragen.

Die Ermächtigung zum Kauf von bis zu 91.420.342 Siemens-Aktien wurde durch eine Ermächtigung zum Rückkauf bis zur Hälfte dieser Aktien durch den Einsatz von Eigenkapitalderivaten wie Put- und Call-Optionen und Kombinationen aus Put-



und Call-Optionen ergänzt. Wie im Geschäftsjahr 2009 müssen die Ausübungsbedingungen dieser Optionen so gewählt sein, dass alle Rückkäufe von eigenen Aktien der Gesellschaft bei Ausübung der Option spätestens bis zum Auslaufen der ergänzenden Ermächtigung stattfinden.

Im November 2007 kündigte Siemens einen Aktienrückkaufplan an. Unter dem Plan erwartete die Gesellschaft ursprünglich Aktienrückkäufe von bis zu 10 Mrd. EUR bis zum Jahr 2010 zu dem Zweck, das Grundkapital einzuziehen oder zu reduzieren oder, zu einem geringeren Umfang, die Verpflichtungen aus aktienbasierten Vergütungsprogrammen zu erfüllen. Zum 30. September 2010 wurden 56.201.421 Stück mit einem Betrag von 4.350 EUR an eigenen Aktien zurückgekauft.

Im Geschäftsjahr 2010 wurden 3.411.245 eigene Aktien in Zusammenhang mit aktienbasierten Vergütungsplänen neu ausgegeben. Zum 30. September 2010 blieben 44.366.416 eigene Aktien mit einem Buchwert von 3.373 EUR im Bestand.

Im Geschäftsjahr 2009 wurden 189 Aktien zu den eigenen Aktien der Gesellschaft zurückgeführt, und 4.868.193 an eigenen Aktien wurden im Rahmen der Pläne zur aktienbasierten Vergütung ausgegeben. Zum 30. September 2009 belief sich der Bestand an eigenen Aktien auf 47.777.661 Stück zu einem Buchwert von 3.632 EUR.

### Sonstiges Ergebnis

Das Sonstige Ergebnis entwickelte sich einschließlich der nicht beherrschenden Anteile wie folgt:

|                                                                                                                   | Geschäftsjahr 2010 |              |              | Geschäftsjahr 2009 |              |                |
|-------------------------------------------------------------------------------------------------------------------|--------------------|--------------|--------------|--------------------|--------------|----------------|
|                                                                                                                   | vor Steuern        | Steuereffekt | Netto        | vor Steuern        | Steuereffekt | Netto          |
| <i>Unrealisierte Beteiligungsgewinne (-verluste) aus zur Veräußerung verfügbaren finanziellen Vermögenswerten</i> | 41                 | - 4          | 37           | 46                 | - 8          | 38             |
| <i>Ergebniswirksame Umbuchungen realisierter Gewinne/Verluste</i>                                                 | - 24               | 6            | - 18         | 44                 | - 10         | 34             |
| Unrealisierte Gewinne/Verluste aus zur Veräußerung verfügbaren finanziellen Vermögenswerten, netto                | 17                 | 2            | 19           | 90                 | - 18         | 72             |
| <i>Unrealisierte Gewinne/Verluste aus derivativen Finanzinstrumenten</i>                                          | - 163              | 39           | - 124        | 335                | - 101        | 234            |
| <i>Ergebniswirksame Umbuchungen realisierter Gewinne/Verluste</i>                                                 | - 36               | 11           | - 25         | 138                | - 43         | 95             |
| Unrealisierte Gewinne/Verluste aus derivativen Finanzinstrumenten, netto                                          | - 199              | 50           | - 149        | 473                | - 144        | 329            |
| Unterschied aus der Währungsumrechnung                                                                            | 1.220              | -            | 1.220        | - 506              | -            | - 506          |
| Versicherungsmathematische Gewinne/Verluste aus Pensionen und ähnlichen Verpflichtungen                           | - 2.889            | 835          | - 2.054      | - 1.692            | 443          | - 1.249        |
| <b>Sonstiges Ergebnis</b>                                                                                         | <b>- 1.851</b>     | <b>887</b>   | <b>- 964</b> | <b>- 1.635</b>     | <b>281</b>   | <b>- 1.354</b> |

Unterschiede aus der Währungsumrechnung resultieren vor allem aus der Aufwertung des US-Dollars im Geschäftsjahr 2010. *Versicherungsmathematische Gewinne/Verluste aus Pensionen und ähnlichen Verpflichtungen* veränderte sich im Geschäftsjahr 2010 hauptsächlich aufgrund einer Anpassung des Abzinsungsfaktors und aufgrund einer Abweichung der tatsächlichen Anlageergebnisse von den erwarteten Anlageergebnissen. Für weitere Informationen siehe »Ziffer 24«.

### Sonstiges

Nach dem deutschen Aktiengesetz bemisst sich die ausschüttungsfähige Dividende nach dem Bilanzgewinn, den die Siemens AG in ihrem gemäß den Vorschriften des deutschen Handelsgesetzbuchs aufgestellten Jahresabschluss ausweist. Im Geschäftsjahr 2010 schüttete die Siemens AG eine Dividende in Höhe von 1.388 EUR (1,60 EUR je Aktie) aus dem Bilanzgewinn des Geschäftsjahrs 2009 an die Aktionäre aus. Im Geschäftsjahr 2009 waren es 1.380 EUR (1,60 EUR je Aktie) aus dem Bilanzgewinn des Geschäftsjahrs 2008.

Der Vorstand schlägt die Ausschüttung einer Dividende von 2,70 EUR je Aktie aus dem Bilanzgewinn der Siemens AG des Geschäftsjahrs 2010 vor, was einer erwarteten Gesamtzahlung von rund 2,4 Mrd. EUR entspricht. Die Zahlung dieser Dividende ist abhängig von der Zustimmung der Hauptversammlung am 25. Januar 2011.

## 28 – Zusätzliche Angaben zum Kapitalmanagement

Das Eigenkapital und die Bilanzsumme betragen zum 30. September 2010 und 2009:

|                                                         | 30. September |               | Änderung<br>in % |
|---------------------------------------------------------|---------------|---------------|------------------|
|                                                         | 2010          | 2009          |                  |
| <b>Summe Eigenkapital der Aktionäre der Siemens AG</b>  | <b>28.346</b> | <b>26.646</b> | <b>6,4 %</b>     |
| als Prozent vom Gesamtkapital                           | 59 %          | 58 %          |                  |
| Kurzfristige Finanzschulden                             | 2.416         | 698           |                  |
| Langfristige Finanzschulden                             | 17.497        | 18.940        |                  |
| <b>Summe Finanzschulden</b>                             | <b>19.913</b> | <b>19.638</b> | <b>1,4 %</b>     |
| als Prozent vom Gesamtkapital                           | 41 %          | 42 %          |                  |
| <b>Gesamtkapital (Eigenkapital plus Finanzschulden)</b> | <b>48.259</b> | <b>46.284</b> | <b>4,3 %</b>     |

Im Geschäftsjahr 2010 ist das Eigenkapital der Aktionäre der Siemens AG gegenüber dem Vorjahr um 6 % gestiegen. Die Summe Finanzschulden stieg während des Geschäftsjahrs 2010 um 1 % an, was zu einem Anstieg des Verhältnisses Eigenkapital zu Gesamtkapital auf 59 % gegenüber 58 % im Vorjahr führte. Das Verhältnis Finanzschulden zu Gesamtkapital sank entsprechend von 42 % im Geschäftsjahr 2009 auf 41 % im Geschäftsjahr 2010. Für weitere Informationen zu den Veränderungen des Eigenkapitals siehe »Ziffer 27« sowie zur Ausgabe und Rückführung von *Finanzschulden* »Ziffer 23«.

Siemens hat Verpflichtungen zur Veräußerung oder sonstigen Ausgabe von Aktien in Zusammenhang mit bestehenden aktienbasierten Vergütungsplänen. Im Geschäftsjahr 2010 wurden die Verpflichtungen aus der aktienbasierten Vergütung durch die Wiederausgabe von eigenen Aktien erfüllt. Siemens wird im Geschäftsjahr 2011 voraussichtlich die aktienbasierten Vergütungspläne ebenfalls durch eigene Aktien erfüllen. Für weiterführende Informationen zu aktienbasierter Vergütung siehe »Ziffer 34« und zu eigenen Aktien »Ziffer 27«.

Im Rahmen des Fit42010-Unternehmensprogramms hat Siemens beschlossen, seine Kapitalstruktur zu optimieren. Für Siemens ist es wichtig, sowohl einen breiten Kapitalmarktzugang zu verschiedenen Fremdfinanzierungsmitteln als auch die Bedienung der Finanzschulden sicherzustellen. Daher hat Siemens ein Kapitalstrukturziel festgelegt, das durch das Verhältnis »Angepasste industrielle Nettoverschuldung« zu »EBITDA (angepasst)« definiert wird. Die Ermittlung der *Angepassten industriellen Nettoverschuldung* ist in folgender Tabelle aufgeführt. Das EBITDA (angepasst) ist definiert als EBIT (angepasst) vor Abschreibungen (definiert als Abschreibungen und Wertminderungen auf Immaterielle Vermögenswerte – ohne Geschäfts- und Firmenwerte) sowie vor Abschreibungen und Wertminderungen auf Sachanlagen und Geschäfts- und Firmenwerte. EBIT (angepasst) ist der Gewinn/Verlust aus fortgeführten Aktivitäten vor Ertragsteuern abzüglich *Zinsertrag*, *Zinsaufwand* und *Sonstiges Finanzergebnis* sowie abzüglich *Ergebnis aus nach der Equity-Methode bilanzierten Beteiligungen*.

Als einen Schritt zur Erreichung der Zielbandbreite (0,8 bis 1,0) haben wir unseren zuvor angekündigten Aktienrückkaufplan mit einem vorgesehenen Gesamtvolumen von bis zu 10 Mrd. EUR bis zum Jahr 2010 umgesetzt (siehe »Ziffer 27«). Während der Geschäftsjahre 2010 und 2009 wurden keine Aktien unter diesem Programm gekauft.

|                                                                                                     | 30. September |              |
|-----------------------------------------------------------------------------------------------------|---------------|--------------|
|                                                                                                     | 2010          | 2009         |
| Kurzfristige Finanzschulden                                                                         | 2.416         | 698          |
| Plus: Langfristige Finanzschulden <sup>1</sup>                                                      | 17.497        | 18.940       |
| Minus: Zahlungsmittel und Zahlungsmitteläquivalente                                                 | - 14.108      | - 10.159     |
| Minus: Kurzfristige Zur Veräußerung verfügbare finanzielle Vermögenswerte                           | - 246         | - 170        |
| <b>Nettoverschuldung</b>                                                                            | <b>5.560</b>  | <b>9.309</b> |
| Minus: SFS Finanzschulden                                                                           | - 10.028      | - 9.521      |
| Plus: Finanzierungsstatus wesentlicher Pensionszusagen                                              | 6.357         | 4.015        |
| Plus: Finanzierungsstatus wesentlicher pensionsähnlicher Verpflichtungen                            | 738           | 646          |
| Plus: Kreditgarantien                                                                               | 597           | 313          |
| Minus: 50 % des Nominalbetrags der Hybridschuldverschreibung <sup>2</sup>                           | - 886         | - 862        |
| Minus: Anpassungen aus Fair Value Hedge Accounting <sup>3</sup>                                     | - 1.518       | - 1.027      |
| <b>Angepasste industrielle Nettoverschuldung</b>                                                    | <b>819</b>    | <b>2.873</b> |
| <b>Angepasstes EBITDA</b><br>(fortgeführte Aktivitäten)                                             | <b>10.034</b> | <b>9.219</b> |
| <b>Angepasste industrielle Nettoverschuldung / angepasstes EBITDA</b><br>(fortgeführte Aktivitäten) | <b>0,08</b>   | <b>0,31</b>  |

- 1 Langfristige Finanzschulden beinhalten Effekte aus der Bilanzierung von Fair Value Hedges in Höhe von 1.518 Mio. EUR für das Geschäftsjahr 2010 (im Vj 1.027 Mio. EUR).
- 2 Die Korrektur betreffend unsere Hybridschuldverschreibung berücksichtigt die von Ratingagenturen angewandte Berechnung dieser Finanzkennzahl, nach der 50 % unserer Hybridschuldverschreibung als Eigenkapital und 50 % als Finanzschulden klassifiziert werden. Diese Zuordnung folgt den Besonderheiten unserer Hybridschuldverschreibung wie lange Laufzeiten und Nachrangigkeit zu allen erstrangigen Anleihen und Verschuldungsverpflichtungen.
- 3 Grundsätzlich werden Finanzschulden zu einem Wert ausgewiesen, der annähernd dem Rückzahlungsbetrag entspricht. Für Finanzschulden, die in einer Sicherungsbeziehung stehen (Fair Value Hedges), wird dieser Wert jedoch hauptsächlich um zinsinduzierte Marktwertänderungen angepasst. Wir ziehen daher diese Marktwertänderungen ab, um auf einen Wert zu kommen, der annähernd dem Rückzahlungsbetrag der Finanzschulden entspricht. Wir sind der Überzeugung, dass dieser Wert aussagekräftiger für die oben dargestellte Berechnung ist.

Zur Erhaltung eines starken Finanzprofils trägt insbesondere unser Kreditrating bei, das durch unsere Kapitalstruktur, Profitabilität, Fähigkeit zur Generierung von Zahlungsmittelzuflüssen, Diversifizierung bezüglich Produkten und in geografischer Hinsicht sowie durch unsere Wettbewerbsposition beeinflusst wird. Die folgende Tabelle zeigt die derzeitige Bewertung unserer Kreditqualität durch die beiden Ratingagenturen Moody's Investors Service und Standard & Poor's:

|                             | 30. September 2010        |                   | 30. September 2009        |                   |
|-----------------------------|---------------------------|-------------------|---------------------------|-------------------|
|                             | Moody's Investors Service | Standard & Poor's | Moody's Investors Service | Standard & Poor's |
| Langfristige Finanzschulden | A1                        | A+                | A1                        | A+                |
| Kurzfristige Finanzschulden | P-1                       | A-1               | P-1                       | A-1               |

Im Geschäftsjahr 2010 hat Moody's Investors Service keine Veränderung des Ratings vorgenommen. Moody's bewertete das langfristige Kreditrating mit »A1«, mit einem Ausblick von »stable« am 9. November 2007. Die Klassifikation von »A« entspricht der dritthöchsten Kreditqualität innerhalb der Ratingkategorien von Moody's. Der numerische Zusatz »1« bedeutet, dass das langfristige Kreditrating von Siemens im oberen Bereich der Kategorie »A« liegt. Der Ratingausblick von Moody's bezeichnet eine Einschätzung hinsichtlich der wahrscheinlichen mittelfristigen Entwicklung des Kreditratings eines Emittenten. Ein Ratingausblick von Moody's fällt in eine der folgenden sechs Kategorien: »positive«, »negative«, »stable«, »developing«, »ratings under review« und »no outlook«.

Unsere kurzfristige Kreditqualität und kurzfristigen Schuldverschreibungen bewertet Moody's Investors Service mit »P-1«. Dies ist die höchstmögliche Bewertung innerhalb des Prime-Rating-Systems von Moody's, das die Fähigkeit eines Emittenten zur Einhaltung seiner vorrangigen unbesicherten Finanzverbindlichkeiten mit ursprünglicher Laufzeit von bis zu einem Jahr abschätzt.

Ferner veröffentlichte Moody's Investors Service die Bewertung unserer Liquiditätsrisiken im Rahmen von »credit opinions«. Unser Liquiditätsprofil wird in der jüngsten Bewertung von Moody's vom 3. Juni 2010 als »sehr gesund« (»very healthy«) bewertet.

Während des Geschäftsjahrs 2010 hat Standard & Poor's das Rating unverändert gelassen. Am 5. Juni 2009 hat Standard & Poor's unser langfristiges Kreditrating mit »A+«, Ausblick »stable« bewertet. Die Klassifikation von »A+« entspricht der dritthöchsten Kreditqualität innerhalb der Ratingkategorien von Standard & Poor's. Der Zusatz »+« bedeutet, dass unser langfristiges Kreditrating im oberen Bereich der Kategorie »A+« liegt. Der Ratingausblick von Standard & Poor's gibt die Ein-

schätzung hinsichtlich der wahrscheinlichen mittelfristigen Entwicklung des langfristigen Kreditratings wieder. Bezüglich des Ausblicks bei Standard & Poor's existieren vier Kategorien: »positive«, »negative«, »stable« und »developing«. Darüber hinaus hat Standard & Poor's am 5. Juni 2009 unser kurzfristiges Kreditrating mit »A-1« bewertet. Diese Klassifikation entspricht dem zweithöchsten kurzfristigen Kreditrating innerhalb der Ratingkategorien von Standard & Poor's.

## 29 – Sonstige finanzielle Verpflichtungen und Eventualverbindlichkeiten

### Haftungsverhältnisse

Die folgende Tabelle weist den maximalen, nicht abgezinsten Betrag aus, für den Siemens am Bilanzstichtag aus Garantien (einschließlich Bürgschaften) haftet:

|                                                                    | 30. September |              |
|--------------------------------------------------------------------|---------------|--------------|
|                                                                    | 2010          | 2009         |
| Garantien / Bürgschaften                                           |               |              |
| Kreditgarantien / -bürgschaften                                    | 597           | 313          |
| Vertragserfüllungsgarantien / -bürgschaften für Leistungen Dritter | 1.093         | 1.092        |
| HERKULES-Verpflichtung                                             | 3.090         | 3.490        |
| Sonstiges                                                          | 3.216         | 2.703        |
|                                                                    | <b>7.996</b>  | <b>7.598</b> |

Die *Kreditgarantien / -bürgschaften* zeigen, in welchem Umfang Siemens für Finanzverpflichtungen Dritter haftet in Fällen, in denen Siemens Lieferant und / oder Vertragspartner ist. Dabei garantiert das Unternehmen im Allgemeinen, dass es im Fall der Nichterfüllung durch den Hauptschuldner dessen Zahlungsverpflichtungen nachkommt. Darüber hinaus gewährt Siemens Kreditgarantien an Gemeinschaftsunternehmen, assoziierte Unternehmen und sonstige Gesellschaften (zur Definition siehe »Ziffern 19 und 39«) als variabel zu beanspruchende Kreditlinien. Als Haftungssumme weist Siemens die Höhe der Inanspruchnahme beziehungsweise der Restschuld des Kredits aus oder – im Fall von Kreditlinien – den Betrag, der maximal in Anspruch genommen werden kann. Die Laufzeit dieser Garantien reicht gewöhnlich von einem bis zu fünf Jahren. Von den gesetzlichen Rückgriffsrechten abgesehen, vereinbart Siemens bei Kreditgarantien im Allge-

meinen keine zusätzlichen Rückgriffsrechte. Zum 30. September 2010 waren für Kreditgarantien Verpflichtungen in Höhe von 55 (im Vj. 11) EUR bilanziert.

Außerdem haftet Siemens mit den *Vertragserfüllungsgarantien* für die Leistungen fremder Dritter im Rahmen gemeinsamer Projekte beziehungsweise Konsortien. Diese beinhalten Anzahlungs- und Leistungserfüllungsgarantien. Kommt der Konsortialpartner seinen rechtlichen Verpflichtungen nicht nach, können Zahlungsforderungen bis zur Höhe des vereinbarten Betrags auf Siemens zukommen. Im Regelfall vereinbart Siemens hier Laufzeiten entsprechend dem zugrunde liegenden Vertrag zwischen drei Monaten und sieben Jahren. Im Allgemeinen ergeben sich aus Konsortialverträgen entsprechende Rückgriffshaftungen zwischen den Konsortialpartnern. Zum 30. September 2010 waren für Vertragserfüllungsgarantien Verpflichtungen in Höhe von 70 (im Vj. 50) EUR bilanziert.

Im Geschäftsjahr 2007 hat die Bundesrepublik Deutschland ein Konsortium aus Siemens IT Solutions and Services und IBM Deutschland GmbH (IBM) beauftragt, die nicht militärische Informations- und Kommunikationstechnik der Bundeswehr zu modernisieren und zu betreiben (Projekt HERKULES). Die vertraglich vereinbarte Leistung wird in einer gesonderten Projektgesellschaft, der BWI Informationstechnik GmbH, erbracht, an der Siemens IT Solutions and Services beteiligt ist. Der Auftrag hat ein Gesamtvolumen von maximal rund 6 Mrd. EUR. Im Dezember 2006 wurden von Siemens im Rahmen dieses Auftrags verschiedene rechtlich und wirtschaftlich miteinander verbundene Haftungserklärungen zugunsten des Auftraggebers Bundesrepublik Deutschland und des Konsortialpartners IBM abgegeben. Die Haftungserklärungen gewährleisten, dass die Projektgesellschaft mit ausreichenden Mitteln ausgestattet ist, die Leistung zu erbringen und damit den Vertrag zu erfüllen. Aufgrund des Verbund- und Mehrschichtcharakters dieser Haftungserklärungen sind diese als eigene Kategorie »HERKULES«-Verpflichtungen in der vorangehenden Tabelle aufgeführt. Die insgesamt mögliche Inanspruchnahme des Siemens-Konzerns beläuft sich zum 30. September 2010 auf 3,09 Mrd. (im Vj. 3,49 Mrd.) EUR und verringert sich über die noch verbleibende Vertragslaufzeit von sieben Jahren ab dem 30. September 2010 jeweils um rund 400 EUR per annum. Die jährliche Inanspruchnahme ist beschränkt auf 400 EUR, zuzüglich eines gegebenenfalls bestehenden Übertrags eines nicht ausgeschöpften Vorjahresbetrags von bis zu 90 EUR.

Sonstiges enthält Schadensersatzverpflichtungen, die in Zusammenhang mit dem Verkauf von Geschäftseinheiten stehen. Diese Garantien können, sofern sie geschäftsüblich für die entsprechende Transaktion sind, den Käufer vor jeglichen potenziellen steuerlichen, rechtlichen und anderen Unwägbarkeiten in Verbindung mit den übernommenen Geschäftseinheiten schützen. Die Schadensersatzverpflichtungen beziehen sich im Wesentlichen auf NSN, veräußert im Geschäftsjahr 2007, sowie auf EN, veräußert im Geschäftsjahr 2008 (siehe »Ziffer 4«). Zum 30. September 2010 waren Verpflichtungen in Höhe von 162 (im Vj. 211) EUR für Sonstiges bilanziert.

Zum 30. September 2010 und 2009 bestanden folgende zukünftige Zahlungsverpflichtungen aus unkündbaren Operating-Leasingverträgen:

|                                                                      | 30. September |      |
|----------------------------------------------------------------------|---------------|------|
|                                                                      | 2010          | 2009 |
| 2010                                                                 | –             | 692  |
| 2011                                                                 | 721           | 516  |
| 2012                                                                 | 552           | 378  |
| 2013                                                                 | 417           | 290  |
| 2014                                                                 | 331           | 240  |
| 2015                                                                 | 281           | –    |
| Nach 2015 im Geschäftsjahr 2010<br>(nach 2014 im Geschäftsjahr 2009) | 824           | 682  |

Der gesamte Mietaufwand belief sich für die Geschäftsjahre 2010 und 2009 auf 1.162 EUR beziehungsweise 1.198 EUR.

Zum 30. September 2010 bestanden Verpflichtungen zu Eigenkapitaleinlagen in verschiedene Unternehmen in einer Höhe von 470 (im Vj. 294) EUR. Die Verpflichtung zum 30. September 2010 beinhaltet eine beteiligungsproportional bedingte Kapitaleinzahlungsverpflichtung gegenüber EN in Höhe von 172 (im Vj. 172) EUR. Der bedingte Betrag ist an die Vornahme von Akquisitionen und Investitionen durch EN geknüpft.

Die Gesellschaft haftet gesamtschuldnerisch und hat Eigenkapitaleinlagenverpflichtungen als Gesellschafterin in Personhandelsgesellschaften sowie im Rahmen von verschiedenen Konsortien.

## 30 – Rechtsstreitigkeiten

### Verfahren wegen Korruption

#### Behördliche und vergleichbare Verfahren

Staatsanwaltschaften und andere Ermittlungsbehörden ermitteln in verschiedenen Jurisdiktionen der Welt gegen die Siemens AG und ihre Tochtergesellschaften sowie gegen mehrere teils ehemalige, teils aktive Mitarbeiter, unter anderem wegen des Vorwurfs der Bestechung von Amtsträgern einschließlich Untreue, Korruption, Geldwäsche und Steuerhinterziehung. Diese Ermittlungsverfahren haben Korruptionsvorwürfe gegen zahlreiche Siemens-Einheiten zum Gegenstand.

Am 15. Dezember 2008 gab Siemens bekannt, dass die in München und Washington D. C. gegen das Unternehmen gerichteten Verfahren in Zusammenhang mit den Vorwürfen der Bestechung von Amtsträgern am gleichen Tag beendet wurden. Die Münchener Staatsanwaltschaft gab die Beendigung des Verfahrens wegen Verletzung der Aufsichtspflicht durch den früheren Gesamtvorstand der Siemens AG bekannt. Von diesem Verfahrensabschluss unberührt bleiben die Verfahren gegen frühere Vorstandsmitglieder und Mitarbeiter der Gesellschaft sowie andere Einzelpersonen. In Washington D. C. bekannte sich Siemens vor dem US-Bundesgericht wegen bewusst umgangener und fehlender interner Kontrollen sowie Nichteinhaltung der Rechnungslegungsvorschriften des US Foreign Corrupt Practices Act (FCPA) strafrechtlich schuldig. In ebenfalls anhängigen Fällen haben sich drei Siemens-Tochtergesellschaften, Siemens S.A. (Argentinien), Siemens Bangladesh Ltd. und Siemens S.A. (Venezuela), in Einzelklagen wegen vorsätzlicher Verletzung des FCPA schuldig bekannt. Zur gleichen Zeit wurde ein von der US-Börsenaufsicht, der Securities and Exchange Commission (SEC), eingeleitetes Zivilverfahren wegen der Verletzung des FCPA abgeschlossen. Dieser Verfahrensabschluss zeigt die ausdrückliche Anerkennung der US-Staatsanwälte für die außergewöhnliche Kooperation, das umfangreiche neue Compliance-Programm sowie die umfassende Aufarbeitung durch Siemens. Auf dieser Basis hat die Leitbehörde für Aufträge der US-Bundesregierung, die Defense Logistics Agency, einen formalen Beschluss erlassen, wonach Siemens ein verlässlicher Vertragspartner für US-Regierungsgeschäfte bleibt.

Gemäß dem in den USA erreichten Verfahrensabschluss wurde Dr. Theo Waigel, früherer Bundesfinanzminister, als Compliance-Monitor verpflichtet. Seine Aufgabe ist es, den Fortschritt bei der Einführung und Durchführung des neuen Compliance-Programms für einen Zeitraum von bis zu vier Jahren zu bewerten und zu berichten.

Im vierten Quartal des Geschäftsjahrs 2008 bildete die Gesellschaft in Zusammenhang mit den laufenden Diskussionen mit der Staatsanwaltschaft München I, der SEC sowie dem United States Department of Justice über die Beendigung der jeweiligen Ermittlungsverfahren eine Rückstellung in Höhe von rund 1 Mrd. EUR. Im ersten Quartal des Geschäftsjahrs 2009 kam es in Zusammenhang mit diesen Strafzahlungen und Vorteilsabschöpfungen zu Zahlungsmittelabflüssen in Höhe von 1,008 Mrd. EUR.

Wie berichtet, hatte die Münchener Staatsanwaltschaft im Oktober 2007 ein vergleichbares Verfahren hinsichtlich des früheren Geschäftsbereichs Communications beendet. In diesem Zusammenhang hatte Siemens 201 EUR bezahlt. Damit beläuft sich die Gesamtsumme der an deutsche Behörden in Zusammenhang mit diesen Verfahren geleisteten Zahlungen auf 596 EUR.

Wie berichtet, ermittelt die Staatsanwaltschaft Wuppertal gegen Mitarbeiter des Unternehmens wegen des Verdachts der Bestechung in Zusammenhang mit der Vergabe eines EU-Auftrags im Jahr 2002 für die Modernisierung eines Kraftwerks in Serbien. Im April 2010 stellte die Staatsanwaltschaft die Ermittlungen ein.

Wie berichtet, werden von den ungarischen Behörden in Bezug auf Siemens Zrt. Ungarn und bestimmte Mitarbeiter Untersuchungen geführt hinsichtlich des Vorwurfs verdächtigter Zahlungen in Zusammenhang mit Beraterverträgen mit zahlreichen Scheinfirmen sowie Bestechungsvorwürfen in Zusammenhang mit der Erteilung eines Auftrags für die Lieferung von Kommunikationsausrüstungen an die ungarische Armee.

Wie berichtet, führt die Staatsanwaltschaft Wien, Österreich, eine Untersuchung von Zahlungen aus den Jahren 1999 bis 2006 in Verbindung mit der Siemens AG Österreich und deren Tochtergesellschaft Siemens VAI Metal Technologies GmbH & Co., bei denen keine angemessene Gegenleistung erkennbar war.

Wie berichtet, untersuchen russische Behörden den Vorwurf der Unterschlagung von Haushaltsgeldern im Rahmen der Vergabe von Lieferverträgen an Siemens über medizinische Ausrüstung an öffentliche Stellen der Stadt Yekaterinburg in den Jahren 2003 bis 2005. Siemens kooperiert mit den Behörden.

Wie berichtet, hatte die Staatsanwaltschaft Nürnberg-Fürth im August 2007 ein Verfahren wegen möglicher Rechtsverstöße in Zusammenhang mit dem Oil-for-Food-Programm der Vereinten Nationen eröffnet. Im Dezember 2008 wurde das Verfahren hinsichtlich aller Betroffenen eingestellt.

Wie berichtet, führte die Staatsanwaltschaft São Paulo, Brasilien, ein Ermittlungsverfahren gegen Siemens hinsichtlich des Einsatzes von Business Consultants sowie fragwürdiger Zahlungen in Zusammenhang mit dem früheren Geschäftsbereich Transportation Systems im Jahr 2000 oder danach. Die Behörde stellte die Ermittlungen im Jahr 2009 ein.

Am 9. März 2009 erhielt die Siemens AG die Entscheidung des Vendor Review Committee of the United Nations Secretariat Procurement Division (UNPD), wonach die Siemens AG für mindestens sechs Monate von der Lieferantendatenbank der UNPD gestrichen wird. Der Ausschluss bezieht sich auf Verträge mit dem UN Secretariat und beruht auf einem Schuldbekenntnis der Siemens AG hinsichtlich Verstößen gegen den US Foreign Corrupt Practices Act vom Dezember 2008. Die Siemens AG geht nicht davon aus, dass diese Entscheidung wesentliche Auswirkungen auf die Vermögens-, Finanz- und Ertragslage haben wird. Am 22. Dezember 2009 reichte die Siemens AG einen Antrag auf Aufhebung des bestehenden Ausschlusses ein, zu dem die Gesellschaft noch keine Rückmeldung erhalten hat.

Im April 2009 erhielt die Siemens AG von der Weltbank, die die International Bank for Reconstruction and Development sowie die International Development Association umfasst, eine Mitteilung über die Einleitung eines behördlichen Verfahrens und Empfehlungen des Evaluation and Suspension Officer in Zusammenhang mit dem Vorwurf, dass es im Rahmen eines von der Weltbank finanzierten Projekts in Russland im Zeitraum von 2004 bis 2006 zu sanktionswürdigen Handlungen gekommen sei. Am 2. Juli 2009 schloss die Gesellschaft mit der International Bank for Reconstruction and Development, der International Development Association, der International Finance Corporation und der Multilateral Investment



Guarantee Agency – zusammen die Weltbankgruppe – einen globalen Vergleich, um alle Ermittlungen der Weltbankgruppe zu Korruptionsvorwürfen gegen Siemens zu beenden. In dem Vergleich verzichtet Siemens freiwillig darauf, für eine Dauer von zwei Jahren, rückwirkend vom 1. Januar 2009 bis zum 31. Dezember 2010, an Ausschreibungen von Projekten, Programmen oder anderen Investitionen, die von der Weltbankgruppe finanziert oder garantiert werden (Weltbank-Projekte), teilzunehmen. Der freiwillige Verzicht hindert Siemens nicht daran, seine Arbeit im Rahmen bestehender Verträge, die für Weltbank-Projekte oder in Zusammenhang mit der Beschaffungsabteilung der Weltbankgruppe geschlossen wurden, fortzusetzen, sofern diese Verträge von Siemens und allen anderen Vertragsparteien vor dem 1. Januar 2009 unterzeichnet wurden. Die Vereinbarung sieht Ausnahmen von diesem freiwilligen Verzicht bei außergewöhnlichen Umständen vor, sofern die Weltbankgruppe zustimmt. Darüber hinaus musste Siemens sich aus allen laufenden Ausschreibungen zurückziehen, einschließlich Angeboten für Beratungsleistungen in Zusammenhang mit Weltbank-Projekten und der Beschaffungsabteilung der Weltbankgruppe, bei denen die Weltbankgruppe nicht vor dem 2. Juli 2009 ihre Zustimmung erteilt hat. Weiterhin wird Siemens der Weltbankgruppe freiwillig sämtliche Fälle möglichen Fehlverhaltens in Zusammenhang mit Weltbank-Projekten offenlegen. Schließlich hat sich Siemens verpflichtet, innerhalb eines Zeitraums von maximal 15 Jahren an bestimmte im Bereich der Korruptionsbekämpfung tätige Organisationen insgesamt 100 Mio. USD zu zahlen. Im Geschäftsjahr 2009 hat die Gesellschaft zulasten *Sonstiger betrieblicher Aufwendungen* eine Rückstellung in Höhe von 53 EUR in Zusammenhang mit dem globalen Vergleich mit der Weltbankgruppe gebildet. Im November 2009 wurden Siemens Russland OOO und die von dieser kontrollierten Gesellschaften in einem separaten Verfahren vor der Weltbankgruppe für die Dauer von vier Jahren von der Teilnahme an Weltbank-Projekten ausgeschlossen. Siemens Russland OOO akzeptierte diesen Ausschluss.

Wie berichtet, ermittelte die norwegische Antikorruptionsbehörde Ökokrim gegen Siemens AS Norwegen sowie zwei ihrer ehemaligen Mitarbeiter im Hinblick auf Zahlungen für Golfreisen in den Jahren 2003 und 2004, an denen Mitarbeiter des norwegischen Verteidigungsministeriums teilgenommen hatten. Am 3. Juli 2009 wurden diese beiden ehemaligen Mitarbeiter durch das erstinstanzliche Gericht in Oslo freigesprochen. Am 16. Juli 2009 erklärte Ökokrim, dass auch das Verfahren gegen Siemens AS Norwegen beendet sei.

Im November 2009 sowie im Februar 2010 legte ein Tochterunternehmen der Siemens AG freiwillig mögliche Verletzungen südafrikanischer Antikorruptionsvorschriften aus der Zeit vor 2007 gegenüber den zuständigen südafrikanischen Behörden offen.

Wie berichtet, hatte die Staatsanwaltschaft Mailand einen aktuellen und einen ehemaligen Mitarbeiter von Siemens S.p.A., Siemens S.p.A. sowie eine ihrer Tochtergesellschaften im November 2007 wegen des Vorwurfs angeklagt, beide Mitarbeiter hätten illegale Zahlungen an Mitarbeiter des staatlichen Gas- und Energieversorgungsunternehmens ENI geleistet. Angeklagt wurden auch nicht zu Siemens gehörende Einzelpersonen und Unternehmen. Die beiden Mitarbeiter, Siemens S.p.A. sowie das Tochterunternehmen schlossen mit der Staatsanwaltschaft Mailand ein »patteggiamento« (einverständliche Verfahrensbeendigung ohne Anerkennung von Schuld oder Verantwortung) ab, das vom Mailänder Gericht am 27. April 2009 bestätigt wurde. Nach den Bestimmungen dieses patteggiamento erhielten Siemens S.p.A. und die Tochtergesellschaft Geldstrafen von jeweils 40,0 Tausend EUR und eine Auflage zur Vorteilsabschöpfung in Höhe von 315,562 Tausend EUR beziehungsweise 502,370 Tausend EUR. Die Mitarbeiter erhielten Freiheitsstrafen auf Bewährung. Die Entscheidung ist rechtskräftig und das Verfahren beendet.

Wie berichtet, führt die argentinische Antikorruptionsbehörde eine Untersuchung bezüglich Amtsträgerbestechung im Hinblick auf die Vergabe eines Auftrags an Siemens für Aufbau und Betrieb eines Systems für digitale Personalausweise, Grenzkontrollen, Datensammlung und Wählerlisten aus dem Jahr 1998. Im August 2008 und Februar 2009 wurden Räumlichkeiten von Siemens Argentinien sowie Siemens IT Services S.A. in Buenos Aires durchsucht. Das Unternehmen kooperiert mit den argentinischen Behörden. Der argentinische Untersuchungsrichter hat zudem mehrfach Rechtshilfeersuche an die Staatsanwaltschaft München sowie das Bundesgericht in New York gestellt.

Am 17. August 2009 erstattete die Anti-Corruption Commission in Bangladesch (ACC) Strafanzeige gegen zwei aktuelle und einen ehemaligen Mitarbeiter des Healthcare-Geschäfts von Siemens Bangladesch. Der Vorwurf geht dahin, dass die Mitarbeiter vor dem Jahr 2007 unerlaubt mit Beschäftigten eines staatlichen Krankenhauses zusammenwirkten, um überhöhte Preise für Medizingeräte zu erzielen.

Am 30. Dezember 2009 sandte die ACC ein Auskunftsverlangen an Siemens Bangladesch Ltd. (Siemens Bangladesch) im Hinblick auf Telekommunikationsprojekte des früheren Geschäftsbereichs Communications (Com) aus der Zeit vor 2007. Am 4. Januar 2010 wurde Siemens Bangladesch darüber informiert, dass in diesem Zusammenhang die Geldwäscheabteilung der Zentralbank von Bangladesch eine Sonderuntersuchung führt. Diese betrifft bestimmte Konten von Siemens Bangladesch und von früheren Mitarbeitern von Siemens Bangladesch in Zusammenhang mit Transaktionen für Com-Projekte aus den Jahren 2002 bis 2006. Am 16. Februar 2010 verlangte die ACC zusätzliche Informationen.

Am 23. Juni 2010 durchsuchte die Staatsanwaltschaft Frankfurt Büroräume von Siemens in Deutschland in Zusammenhang mit dem Vorwurf fragwürdiger Zahlungen bei einem Projekt des Sektors Industry in Thailand. Siemens kooperiert mit der Behörde.

Im August 2010 leitete die Inter-American Development Bank (IADB) ein Sanktionsverfahren unter anderem gegen Siemens IT Solutions and Services Argentinien wegen des Vorwurfs betrügerischer Falschangaben und von Kartellverstößen in Zusammenhang mit einer öffentlichen Ausschreibung aus dem Jahr 2003 für ein Projekt in der argentinischen Provinz Córdoba ein. Siemens kooperiert mit der IADB.

Im August 2010 leitete die IADB zudem ein Sanktionsverfahren unter anderem gegen Siemens Venezuela wegen des Vorwurfs betrügerischer Falschangaben und Amtsträgerbestechung in Zusammenhang mit einer öffentlichen Ausschreibung aus dem Jahr 2003 für Projekte im Gesundheitswesen in den venezuelanischen Provinzen Anzoategui und Mérida ein. Siemens kooperiert mit der IADB.

Wie bereits berichtet, wurde im Februar 2010 ein Parlamentarischer Untersuchungsausschuss (GPU) in Griechenland eingerichtet, um zu untersuchen, ob griechische Politiker oder Beamte in behauptete Vergehen von Siemens involviert waren. Die Untersuchungen des GPU beziehen sich auf mögliche strafrechtlich relevante Handlungen von Politikern und Beamten. Die griechische Staatsanwaltschaft führt zusätzlich Untersuchungen zu Bestechungs- und Betrugsvorwürfen gegen – unter anderem – ehemalige Organmitglieder und ehemalige Leitende Angestellte der Siemens A.E. Griechenland (Siemens A.E.) und der Siemens AG durch. Beide Untersuchungen könnten sich unter Umständen negativ auf derzeit laufende

zivilrechtliche Verfahren der Siemens AG und der Siemens A.E. sowie die weitere Entwicklung der Geschäftstätigkeit von Siemens in Griechenland auswirken. Im September 2010 hat der GPU in einer vorläufigen Schätzung angenommen, dass sich die vermeintlichen Schäden des griechischen Staates aus Verträgen mit Siemens auf bis zu 2 Mrd. EUR belaufen könnten. Für Siemens ist derzeit weder die Grundlage noch die Berechnung dieser vermeintlichen Schäden nachvollziehbar.

Wie bereits berichtet, wurden von der nigerianischen Economic and Financial Crimes Commission (EFCC) Ermittlungen wegen des Vorwurfs ungesetzlicher Zahlungen durch Siemens an nigerianische Amtsträger zwischen 2002 und 2005 geführt. Im Oktober 2010 reichte die EFCC beim Federal High Court in Abuja und dem High Court of the Federal Capital Territory Anklagen – unter anderem – gegen Siemens Ltd. Nigeria (Siemens Nigeria), die Siemens AG und frühere Organmitglieder der Siemens Nigeria ein. Am 22. November 2010 schlossen die Nigerianische Regierung und Siemens Nigeria eine außergerichtliche Vereinbarung, wonach Siemens Nigeria an den nigerianischen Staat einen mittleren zweistelligen Euro-Millionenbetrag zahlt und im Gegenzug die nigerianische Regierung die Anklagen zurückzieht sowie umfassend auf sämtliche strafrechtlichen, zivilrechtlichen und sonstigen Maßnahmen – wie etwa einen Geschäftsausschluss – gegen Siemens Nigeria, die Siemens AG und Siemens-Mitarbeiter verzichtet.

Gegen Siemens werden weiterhin korruptionsbezogene Ermittlungen in einigen Jurisdiktionen weltweit durchgeführt. Dies kann dazu führen, dass Siemens oder einzelne Mitarbeiter wegen Gesetzesverstößen straf- oder zivilrechtlich belangt werden. Ferner kann sich der Umfang der anhängigen Untersuchungen ausweiten und können neue Untersuchungen in Zusammenhang mit Vorwürfen hinsichtlich Bestechung oder anderer rechtswidriger Handlungen aufgenommen werden. Negative Folgen können sich daraus auch für die laufende Geschäftstätigkeit, die Finanz- und Ertragslage und die Reputation des Unternehmens ergeben, insbesondere in Form von Strafzahlungen, Geldbußen, Vorteilsabschöpfungen, Schadensersatz, Rechtsstreitigkeiten mit Dritten, inklusive Wettbewerbern, formellen oder informellen Ausschlüssen bei der öffentlichen Auftragsvergabe oder dem Entzug oder Verlust der Gewerbe- oder Betriebserlaubnis. Weitere Aufwendungen oder Rückstellungen für Strafzahlungen, Geldbußen, Schadensersatz oder andere Zahlungen, die wesentlich sein könnten, könnten künftig in Zusammenhang mit den Untersuchungen bilanziert werden müssen.

Wie bereits berichtet, geht die Gesellschaft Hinweisen zu Bankkonten und deren Höhe in unterschiedlichen Ländern nach. Einige Geldbeträge sind durch Behörden arrestiert worden. Im Geschäftsjahr 2010 wurde ein Betrag in Höhe von 40 EUR aus der vereinbarten Rückführung von einem dieser Konten in den *Sonstigen betrieblichen Erträgen* erfasst.

### Zivilrechtliche Verfahren

Wie bereits in Pressemitteilungen der Gesellschaft bekannt gemacht, hat die Siemens AG Schadensersatz von ehemaligen Vorstands- und Aufsichtsratsmitgliedern verlangt. Die Gesellschaft begründete die Ansprüche mit der Verletzung von Organisations- und Aufsichtspflichten vor dem Hintergrund des Vorwurfs illegaler Geschäftspraktiken im ausländischen Geschäftsverkehr in den Jahren 2003 bis 2006 und den daraus folgenden finanziellen Belastungen der Gesellschaft. Am 2. Dezember 2009 hat sich Siemens mit neun von elf ehemaligen Vorstands- und Aufsichtsratsmitgliedern verglichen. Zwischen der Gesellschaft und einzelnen Organmitgliedern abgeschlossene Vergleichsvereinbarungen standen, wie gesetzlich vorgeschrieben, unter dem Vorbehalt der Zustimmung der Hauptversammlung. Die Gesellschaft erreichte mit den D&O-Versicherern eine Einigung im Hinblick auf einen Vergleich über Ansprüche in Zusammenhang mit der D&O-Versicherung mit Leistungen in einer Größenordnung von bis zu 100 EUR. Die ordentliche Hauptversammlung der Siemens AG hat am 26. Januar 2010 allen neun vorgeschlagenen Vergleichen zwischen der Gesellschaft und ehemaligen Mitgliedern des Vorstands sowie des Aufsichtsrats zugestimmt. Die Anteilseigner haben zudem die Einigung über Ansprüche aus der D&O-Versicherung bewilligt. Im zweiten Quartal des Geschäftsjahrs 2010 wurden auf der Grundlage der vorgenannten Vergleiche Leistungen an die Siemens AG erbracht, wovon der Ausweis eines Nettobetrags in Höhe von 96 EUR, nach Abzug damit in Zusammenhang stehender Aufwendungen, im Wesentlichen in den *Sonstigen betrieblichen Erträgen* resultierte. Hierin enthalten sind 84 EUR aus dem Vergleich mit den D&O-Versicherern sowie 12 EUR aus Vergleichen mit ehemaligen Organmitgliedern. Die ehemaligen Organmitglieder nutzten Ansprüche, die sie gegen die Siemens AG hatten, zur Aufrechnung gegen Teile ihrer Verpflichtungen aus den vorgenannten Vergleichen. Der noch verbleibende Betrag wurde oder wird von den ehemaligen Organmitgliedern in bar entrichtet. Die Siemens AG hat gegen die beiden nicht vergleichsbereiten ehemaligen Vorstände Thomas Ganswindt und Heinz-Joachim Neubürger am 25. Januar 2010 Schadensersatzklage beim Landgericht München I eingereicht. Die Klageschriften wurden den Beklagten zugestellt. Die Beklagten

haben sich mit einem Dokumentenvorlageverlangen an die Siemens AG gewandt.

Wie berichtet, erhob im Februar 2007 ein angeblicher Inhaber von American Depositary Shares der Siemens AG im Rahmen eines sogenannten Shareholder Derivative Lawsuit beim Supreme Court des Bundesstaats New York Klage gegen derzeitige und ehemalige Mitglieder des Vorstands und des Aufsichtsrats der Siemens AG sowie gegen die Siemens AG als nominal beklagte Partei. Ziel der Klage war es, verschiedene Ansprüche in Bezug auf die Korruptionsvorwürfe und verwandte Verstöße bei Siemens geltend zu machen. Der Shareholder Derivative Lawsuit wurde im September 2009 zurückgezogen.

Wie berichtet, hat im Juni 2008 die Republik Irak auf der Grundlage der Ergebnisse des »Report of the Independent Inquiry Committee into the United Nations Oil-for-Food Programme« eine unbezifferte Schadensersatzklage beim United States District Court for the Southern District of New York gegen 93 namentlich benannte Beklagte eingereicht. Siemens S.A.S. Frankreich, Siemens A.Ş. Türkei und OSRAM Middle East FZE, Dubai, gehören zu den 93 Beklagten. Allen drei Tochterunternehmen von Siemens wurde die Klage zugestellt. Die drei Siemens-Tochterunternehmen werden sich gegen die Klage zur Wehr setzen.

Wie berichtet, hatte die Siemens AG beim International Center for Settlement of Investment Disputes (ICSID) bei der Weltbank ein Schiedsgerichtsverfahren gegen die Republik Argentinien (Argentinien) eingeleitet. Die Siemens AG vertrat den Standpunkt, dass Argentinien den Vertrag mit Siemens über den Aufbau und Betrieb eines Systems für digitale Personalabweise, Grenzkontrollen, Datensammlung und Wählerlisten (DNI-Projekt) unrechtmäßig gekündigt und dadurch eine Verletzung des Investitionsschutzabkommens zwischen Deutschland und Argentinien (BIT) begangen habe. Die Siemens AG forderte Schadensersatz in Höhe von circa 500 Mio. USD wegen Enteignung und Verletzung des BIT. Das Schiedsgericht hat der Siemens AG mit Endurteil vom 6. Februar 2007 einstimmig eine Entschädigung in Höhe von insgesamt 217,8 Mio. USD zuzüglich 2,66% Zinsen hierauf seit 18. Mai 2001 zugesprochen. Das Schiedsgericht entschied außerdem, dass Argentinien die Siemens AG von allen Ansprüchen von Subunternehmen in diesem Projekt (in Summe circa weitere 44 Mio. USD) freizustellen hat sowie der Siemens AG im Falle der nicht rechtzeitigen Rückgabe der Vertragserfüllungsgarantie

für dieses Projekt den vollen Betrag der Vertragserfüllungsgarantie in Höhe von weiteren 20 Mio. USD zurückzahlen hat. Die vom Schiedsgericht für die Rückgabe der Vertragserfüllungsgarantie festgelegte Frist ist ohne Erfüllung durch Argentinien verstrichen. Wie berichtet, stellte Argentinien in weiterer Folge Anträge auf Annullierung und auf Revision des Urteils und auf Suspendierung der Vollstreckung aus dem Urteil beim ICSID. Am 12. August 2009 schlossen Argentinien und die Siemens AG einen Vergleich, wonach der anhängige Rechtsstreit sowie sämtliche damit in Zusammenhang stehende Verfahren im gegenseitigen Einvernehmen ohne Anerkennung irgendwelcher Rechtspflichten und ohne Anerkennung irgendwelcher Ansprüche beendet werden. Zwischen den Parteien erfolgten keine Zahlungen.

Wie berichtet, wurde Siemens von einem Wettbewerber kontaktiert, um über angebliche Ansprüche des Wettbewerbers gegen Siemens zu sprechen. Die behaupteten Ansprüche beziehen sich auf angeblich unerlaubte Zahlungen von Siemens in Zusammenhang mit der Vergabe von öffentlichen und privaten Aufträgen. Siemens prüft, ob eine Grundlage für solche Ansprüche gegeben ist. Der Wettbewerber und Siemens befinden sich in Gesprächen, deren Ausgang offen ist.

Wie berichtet, wurde im Dezember 2009 gegen die Siemens AG eine Wertpapier-Sammelklage am United States District Court for the Eastern District of New York eingereicht. Mit der Klage werden Schadensersatzansprüche für die behauptete Verletzung von US-amerikanischem Wertpapierrecht gegen die Siemens AG geltend gemacht. Die Gesellschaft setzt sich gegen die Klage zur Wehr.

### Kartellverfahren

Wie berichtet, hat im Juni 2007 die türkische Wettbewerbsbehörde ihre frühere Entscheidung bekräftigt, wonach wegen Kartellrechtsverstößen auf dem Gebiet der Verkehrssignalanlagen ein Bußgeld von umgerechnet etwa 6 EUR gegen Siemens A.Ş. Türkei verhängt wird. Siemens A.Ş. Türkei hat dagegen ein Rechtsmittel eingelegt, das noch anhängig ist.

Wie berichtet, hatte die norwegische Wettbewerbsbehörde im Februar 2007 ein Verfahren wegen möglicher Wettbewerbsverletzungen auf dem Gebiet der Brandschutzanlagen gegen verschiedene norwegische Gesellschaften, einschließlich Siemens Building Technologies AS, eingeleitet. Im Dezember 2008 entschied die norwegische Wettbewerbsbehörde abschließend, dass seitens Siemens Building Technologies AS keine Wettbewerbsverletzung vorliegt.

Wie berichtet, hatte die Europäische Kommission im Februar 2007 eine Untersuchung zu möglichen Kartellrechtsverstößen bei europäischen Herstellern von Hochleistungstransformatoren, unter anderem bei der Siemens AG und bei der im Juli 2005 von Siemens übernommenen VA Technologie AG (VA Tech), eingeleitet. Mittlerweile wurde auch das Bundeskartellamt in das Verfahren einbezogen und untersucht die Vorwürfe, soweit sie sich auf den deutschen Markt beschränken. Bei Hochleistungstransformatoren handelt es sich um elektrische Ausrüstung, die einen wesentlichen Bestandteil von Stromübertragungssystemen bildet und die Stromspannung regelt. Siemens kooperiert bei der noch andauernden Untersuchung mit der Europäischen Kommission und dem Bundeskartellamt. Am 7. Oktober 2009 verhängte die Europäische Kommission Bußgelder in Höhe von insgesamt 67,644 EUR gegen sieben Unternehmen wegen einer Absprache zur Aufteilung der Märkte in Japan und Europa. Siemens wurde nicht belangt, weil die Gesellschaft diesen Teil des Vorgangs den Behörden freiwillig offengelegt hatte. Das Bundeskartellamt setzt seine Untersuchung hinsichtlich des deutschen Markts fort.

Wie berichtet, haben im April 2007 die Siemens AG und VA Tech Klagen vor dem Europäischen Gericht erster Instanz in Luxemburg gegen die Entscheidungen der Europäischen Kommission vom 24. Januar 2007 eingereicht, mit denen gegen Siemens und VA Tech Bußgelder wegen des Vorwurfs kartellrechtswidriger Absprachen bei gasisolierten Hochspannungsschaltanlagen auf dem Europäischen Markt zwischen 1988 und 2004 verhängt wurden. Bei einer gasisolierten Schaltanlage handelt es sich um elektrische Ausrüstung, die einen wesentlichen Bestandteil von Umspannwerken bildet. Die gegen die Siemens AG verhängte Geldbuße betrug 396,6 EUR und wurde von der Gesellschaft 2007 bezahlt. Die gegen die im Juli 2005 von Siemens übernommene VA Tech verhängte Geldbuße betrug 22,1 EUR. Zusätzlich haftet VA Tech gesamtschuldnerisch mit Schneider Electric für eine weitere Geldbuße von 4,5 EUR. Das Europäische Gericht erster Instanz hat noch keine Entscheidung verkündet. Zusätzlich zu den in diesem Dokument angeführten Verfahren laufen auch in Brasilien, der Tschechischen Republik und der Slowakei Untersuchungen wegen ähnlicher Vorwürfe. Im Oktober 2010 hat der High Court von Neuseeland eine entsprechende Klage gegen Siemens abgewiesen. Die Rechtsmittelfrist ist noch nicht abgelaufen.

Wie bereits berichtet, hatte am 25. Oktober 2007 ein ungarisches Gericht für Wettbewerbsachen auf ein Rechtsmittel der Gesellschaft hin Bußgelder wegen möglicher Kartellver-

stöße im Bereich gasisolierter Hochspannungsschaltanlagen hinsichtlich der Siemens AG von 0,320 EUR auf 0,120 EUR und hinsichtlich VA Technologie AG von 0,640 EUR auf 0,110 EUR reduziert. Die Gesellschaft und die Wettbewerbsbehörde haben diese Entscheidung angefochten. Im November 2008 bestätigte das Berufungsgericht die Bußgeldreduzierung. Am 5. Dezember 2008 legte die Wettbewerbsbehörde wegen angeblicher Rechtsverletzung einen außerordentlichen Rechtsbehelf beim Obersten Gerichtshof ein. Im Dezember 2009 wurde die Siemens AG darüber informiert, dass der Oberste Gerichtshof den Fall an das Berufungsgericht zur erneuten Entscheidung über die Bußgeldhöhe zurückverwiesen hat. Der außerordentliche Rechtsbehelf der Wettbewerbsbehörde wurde am 27. Januar 2010 durch das Berufungsgericht rechtskräftig abgewiesen. Am 6. April 2010 legte die Wettbewerbsbehörde einen weiteren außerordentlichen Rechtsbehelf beim Obersten Gerichtshof ein.

In Zusammenhang mit dem Bußgeldbescheid der EU-Kommission vom 24. Januar 2007 wegen angeblicher kartellrechtswidriger Absprachen bei gasisolierten Hochspannungsschaltanlagen werden Ansprüche gegen Siemens geltend gemacht. Unter anderem hat im November 2008 National Grid Electricity Transmission Plc. (National Grid) eine Klage beim High Court of England and Wales eingereicht. 21 Gesellschaften, einschließlich der Siemens AG und einiger ihrer Tochterunternehmen, wurden als Beklagte benannt. National Grid fordert insgesamt circa 249 Mio. GBP als Schadensersatz nebst Zinsen. Siemens hält die Behauptungen von National Grid für unbegründet. Wie dargestellt, wurde gegen den Bußgeldbescheid der Kommission Klage beim Europäischen Gericht erster Instanz eingereicht. Am 12. Juni 2009 hat das High Court of England and Wales das bei ihm anhängige Verfahren bis drei Monate nach einer Entscheidung des Europäischen Gerichts erster Instanz und im Fall einer Berufung bis drei Monate nach einer Entscheidung des Europäischen Gerichtshofs ausgesetzt. Am 26. Juni 2009 haben die Siemens-Gesellschaften ihre Klageerwiderung eingereicht und beantragt, die Klage von National Grid zurückzuweisen. Derzeit wird das Beweisverfahren (Discovery) durchgeführt.

Wie berichtet, hatte die südafrikanische Wettbewerbskommission den Verdacht von Kartellverstößen im Bereich gasisolierter Hochspannungsschaltanlagen untersucht. Im Mai 2009 wurde das Unternehmen davon unterrichtet, dass die Wettbewerbskommission die Ermittlungen nicht fortsetzen wird.

Wie berichtet, wurde im Dezember 2007 in Israel ein Antrag auf Zulassung einer Class Action auf der Grundlage der Bußgeldbescheide der EU-Kommission für angebliche Kartellverstöße im Bereich gasisolierter Hochspannungsschaltanlagen gestellt. Die Klage richtete sich gegen 13 Unternehmen, darunter Siemens AG Deutschland, Siemens AG Österreich und Siemens Israel Ltd. In der Klage wurde behauptet, dass Strombezieher in Israel einen Schaden in Höhe von ungefähr 575 EUR erlitten hätten, weil durch die angeblichen Absprachen zu hohe Strompreise gezahlt worden sein sollen. In einer Anhörung am 11. Dezember 2008 beantragte der Kläger die Rücknahme der Klage und des Antrags auf Zulassung einer Class Action. Das Gericht stimmte diesem Antrag zu und wies die Klage und den Antrag auf Zulassung einer Class Action zurück.

Im Januar 2010 hat die Europäische Kommission eine Untersuchung in Zusammenhang mit bereits berichteten Untersuchungen in Neuseeland und in den USA zu möglichen Kartellrechtsverstößen bei Herstellern von flexiblen Stromübertragungssystemen, unter anderem der Siemens AG, eingeleitet. Im April 2010 haben Behörden in Korea und Mexiko der Gesellschaft die Einleitung entsprechender Verfahren mitgeteilt. Die Siemens AG kooperiert mit den Behörden. Am 1. Juni 2010 teilte die neuseeländische Wettbewerbsbehörde der Siemens AG mit, dass sie ihr Verfahren eingestellt hat. Am 13. September 2010 teilte die Europäische Kommission der Siemens AG mit, dass sie ihr Verfahren eingestellt hat. Am 17. November 2010 teilte die koreanische Wettbewerbsbehörde der Siemens AG mit, dass sie ihr Verfahren eingestellt hat.

Am 11. Februar 2010 hat die italienische Kartellbehörde die Büroräume mehrerer auf dem Gebiet der Medizintechnik tätiger Unternehmen, unter anderem der Siemens Healthcare Diagnostics S.r.l. und der Siemens S.p.A., in Zusammenhang mit dem Vorwurf wettbewerbswidriger Absprachen bei einer Ausschreibung der Beschaffungsbehörde für den öffentlichen Gesundheitssektor der italienischen Region Kampanien, So.Re.Sa., für die Lieferung medizinischer Geräte im Jahr 2009 durchsucht. Siemens kooperiert mit der Behörde.

#### Andere Verfahren

Wie berichtet, waren die Gesellschaft und das taiwanische Unternehmen Qisda Corp. (vormals BenQ Corp.) ab Dezember 2006 Parteien eines Schiedsverfahrens vor der International Chamber of Commerce (ICC), betreffend den Kauf des Mobile-Devices-Geschäfts durch Qisda von der Siemens AG im Jahr 2005. Die Parteien haben die Streitigkeiten in weiterer Folge beigelegt, und die ICC hat aufgrund eines gemeinsamen

Antrags der Parteien im März 2009 einen Schiedsvergleich erlassen.

Am 25. November 2008 gaben die Siemens AG und der Insolvenzverwalter der BenQ Mobile GmbH & Co. OHG bekannt, dass sie nach konstruktiven Diskussionen, die im Jahr 2006 begannen, einen Vergleich abgeschlossen haben. In der Vergleichsvereinbarung hat sich die Siemens AG verpflichtet, eine Bruttozahlung von 300 EUR zu leisten. Diese Zahlung erfolgte im Dezember 2008. Aufgrund der von der Siemens AG angemeldeten und vom Insolvenzverwalter anerkannten Forderungen wird erwartet, dass letztlich die Nettozahlung insgesamt etwa 255 EUR betragen wird. Da in der Vergangenheit bereits ausreichend Vorsorgen für den Vergleich getroffen worden waren, ergab sich aus dem Vergleich kein wesentlicher negativer Effekt auf die Ertragslage der Siemens AG im Geschäftsjahr 2009.

Wie bereits berichtet, ist die Siemens AG Mitglied eines Lieferantenkonsortiums, das von Teollisuuden Voima Oyj (TVO) mit der Errichtung des Kernkraftwerks »Olkiluoto 3« auf Turnkey-Basis in Finnland beauftragt wurde. Ein Anteil von circa 27% des Vertragspreises, der dem Lieferantenkonsortium zusteht, entfällt auf die Siemens AG. Das andere Mitglied des Lieferantenkonsortiums ist ein weiteres Konsortium, bestehend aus Areva NP S.A.S. und deren 100%igem Tochterunternehmen Areva NP GmbH. Der vereinbarte Fertigstellungstermin für das Kernkraftwerk war der 30. April 2009. Die Fertigstellung hat sich aus Gründen verzögert, die strittig sind. Das Lieferantenkonsortium erhob im Dezember 2008 Schiedsklage gegen TVO. In dieser fordert das Lieferantenkonsortium eine Bauzeitverlängerung und nunmehr circa 1,23 Mrd. EUR an Nachträgen und Schadensersatz. In der Klageerwiderung bestreitet TVO, dass dem Lieferantenkonsortium Bauzeitverlängerung zusteht, und macht widerklagend Gegenansprüche geltend. Diese bestehen im Wesentlichen aus Verzugserschadensersatzansprüchen in Höhe von circa 1,43 Mrd. EUR, basierend auf einer geschätzten Fertigstellung im Juni 2012 mit einem Verzug von 38 Monaten. Bei vollumfänglicher Kooperation aller beteiligten Parteien ist die erste Beladung des Reaktors mit Brennelementen für Ende 2012 geplant. Im Anschluss daran folgt die Inbetriebsetzungsphase der Gesamtanlage. Diese Testphase wird mehrere Monate in Anspruch nehmen. Die Fertigstellung wird aus heutiger Sicht noch im Kalenderjahr 2013 erwartet.

Anfang 2009 hat die Siemens AG ihr Joint Venture mit Areva S.A. (Areva) gekündigt. In der Folge wurden Gespräche mit der staatlichen Atomenergiewirtschaft Rosatom (Rosatom)

über eine mögliche neue Partnerschaft aufgenommen, die im Bereich des Kernkraftwerksbaus tätig sein soll und in der die Siemens AG Minderheitsaktionär würde. Im April 2009 hat Areva eine ICC-Schiedsklage gegen die Siemens AG eingereicht. Areva hat in der Schiedsklage beantragt, der Siemens AG zu untersagen, diese Verhandlungen mit Rosatom fortzuführen, eine Verletzung wesentlicher Vertragspflichten durch die Siemens AG festzustellen, den an die Siemens AG zu zahlenden Kaufpreis für den Siemens-AG-Anteil an dem Areva-NP-S.A.S.-Joint-Venture herabzusetzen und Areva einen noch zu beziffernden Schadensersatz zuzusprechen. In ihrer im Juni 2009 eingereichten Klageantwort hat die Siemens AG die Zurückweisung der Schiedsklage und eine Kaufpreiserhöhung beantragt. Das Schiedsgericht ist bestellt und das eigentliche Verfahren eingeleitet. Am 17. November 2009 hat das Schiedsgericht durch vorläufige Anordnung entschieden, dass die Siemens AG hinsichtlich der geplanten Partnerschaft mit Rosatom bestimmten vorläufigen Beschränkungen unterliegt, jedoch nicht darin gehindert ist, Verhandlungen während des Hauptsacheverfahrens fortzuführen. Areva hält den Antrag auf Schadensersatz nicht mehr aufrecht. Im September 2010 hat die mündliche Verhandlung zur Hauptsache stattgefunden. Die Endentscheidung des Schiedsgerichts bleibt offen.

Wie berichtet, hatte eine mexikanische Kontrollbehörde Siemens S.A. de C.V. Mexico (Siemens Mexico) für die Dauer von drei Jahren und neun Monaten von der Teilnahme an öffentlichen Ausschreibungen ab dem 30. November 2005 ausgeschlossen. Das Verfahren hatte den Vorwurf zum Gegenstand, Siemens Mexico habe geringfügige steuerliche Abweichungen im Rahmen des Vertragsschlusses mit einem öffentlichen Auftraggeber in 2002 nicht offengelegt. Aufgrund mehrerer Rechtsmittel von Siemens Mexico wurde der Ausschluss zunächst ausgesetzt und danach auf einen Zeitraum von vier Monaten verkürzt. Im Juni 2009 wurde das Unternehmen schließlich durch das zuständige Gericht darüber informiert, dass der Ausschluss vollständig aufgehoben wurde.

Im Juli 2008 hat Herr Abolfath Mahvi Schiedsklage bei der ICC eingereicht, in der er Schadensersatz in Höhe von 150 Mio. DM (beziehungsweise den entsprechenden Betrag in Euro, der sich auf circa 77 EUR beläuft) zuzüglich Zinsen von der Siemens AG verlangt. Herr Mahvi stützt seinen Anspruch auf einen Vertrag von 1974, der zwischen einem damaligen Tochterunternehmen der Siemens AG und zwei Gesellschaften abgeschlossen wurde, von denen die eine auf den Bermudas und die andere in Liberia ansässig war. Herr Mahvi behauptet, Rechtsnachfolger der Gesellschaften auf den Bermudas und



in Liberia zu sein. Weiterhin behauptet er, dass diese Gesellschaften die Siemens AG bei der Akquise eines Kraftwerksprojekts in Bushehr, Iran, unterstützt hätten. Das Schiedsurteil wurde der Siemens AG am 24. August 2010 zugestellt. Die Forderungen des Herrn Mahvi sind vollumfänglich abgewiesen worden. Der Kläger hat die Kosten des Schiedsverfahrens zu tragen.

Im Juli 2008 hat Hellenic Telecommunications Organization Société Anonyme (OTE) in Deutschland vor dem Landgericht München eine Auskunftsklage gegenüber der Siemens AG mit dem Ziel erhoben, Siemens zu verurteilen, die Ergebnisse der internen Ermittlungen offenzulegen, soweit diese OTE betreffen. OTE begehrt Auskunft zu den Vorwürfen angeblicher unlauterer Einflussnahme und/oder Bestechung in Zusammenhang mit Aufträgen, die zwischen 1992 und 2006 zwischen der Siemens AG und OTE abgeschlossen wurden. OTE hat im Mai 2009 in Griechenland Akteneinsicht durch die Staatsanwaltschaft erhalten. OTE hat Ende Juli 2010 die Klage erweitert und beantragt, die Siemens AG wegen angeblich an OTE-Mitarbeiter geleisteter Bestechungszahlungen zur Zahlung von Schadensersatz an OTE in Höhe von mindestens 57,07 EUR zu verurteilen. Die Siemens AG ist derzeit damit befasst, die Abwehr der Klageerweiterung vorzubereiten. Die mündliche Verhandlung ist für Februar 2011 anberaumt.

Die Siemens A.E. hat sich im Mai 2003 im Wege eines Subunternehmervertrags gegenüber Science Applications International Corporation, Delaware, USA (SAIC), im Vorfeld der Olympischen Spiele in Athen zur Lieferung und Installation eines bedeutenden Anteils an einem Sicherheitsüberwachungssystem (sogenanntes C4I-Projekt) verpflichtet. Siemens A.E. erfüllte seine Pflichten aus dem Subunternehmervertrag. Dennoch rügte der griechische Staat Mängel am C4I-System und machte Minderungen in zweistelliger Millionenhöhe geltend. Darüber hinaus hält der griechische Staat die Schlusszahlung in Höhe eines zweistelligen Millionenbetrags zurück, jüngst unter Hinweis auf die bislang angeblich nicht erfolgte formale Endabnahme des Projekts. Obwohl Siemens A.E. nicht Vertragspartner des griechischen Staats ist, haben die verweigerten Zahlungen aufgrund des mit SAIC bestehenden Subunternehmervertrags wirtschaftlich auch auf Siemens A.E. Auswirkungen. SAIC hat ein Schiedsverfahren eingeleitet, in dem sämtliche Ansprüche Griechenlands und die Zulässigkeit der Einbehalte bestritten werden. Der griechische Staat hat unter anderem das Ruhen des Schiedsverfahrens im Hinblick auf die laufenden Ermittlungsverfahren der griechischen Staatsanwaltschaft beantragt. Eine Streitbeilegung wird durch öffentliche Bestechungs- und Betrugsvorwürfe ge-

gen Siemens A.E. in Griechenland und damit einhergehend negative Presseberichterstattung hinsichtlich des C4I-Systems erschwert.

Die griechischen Steuerbehörden haben die Steuerjahre 1997 bis 2003 sowie 2004 bis 2007 geprüft. In diesem Zusammenhang hat Siemens A.E. im dritten Quartal des Geschäftsjahrs 2010 auf Basis einer vorläufigen Mitteilung der Ergebnisse der Steuerprüfung Steuerzahlungen gemäß einem im April 2010 verabschiedeten Steuergesetz geleistet, um bestimmte Sachverhalte beizulegen, für die Vorsorgen gebildet worden waren. Siemens A.E. geht davon aus, dass keine weiteren wesentlichen Feststellungen von den griechischen Steuerbehörden zu erwarten sind, die weitere wesentliche Zahlungen von Siemens erfordern würden.

Im Dezember 2008 nahm die polnische Behörde für innere Sicherheit (*Agency of Internal Security – AWB*) einen Mitarbeiter von Siemens Healthcare Polen in Haft in Zusammenhang mit einer Untersuchung hinsichtlich einer öffentlichen Ausschreibung des Krankenhauses Wrocław aus dem Jahr 2008. Die AWB erhebt den Vorwurf, der Siemens-Mitarbeiter und der stellvertretende Krankenhausdirektor hätten das Ausschreibungsverfahren manipuliert. Im Oktober 2010 wurde die Untersuchung eingestellt.

Im April 2009 durchsuchte der Defense Criminal Investigative Service des US-Verteidigungsministeriums die Räumlichkeiten von Siemens Medical Solutions USA, Inc. in Malvern, Pennsylvania, in Zusammenhang mit einem Ermittlungsverfahren hinsichtlich eines Siemens-Vertrags mit dem US-Verteidigungsministerium über die Lieferung medizinischer Geräte.

Im Juni 2009 legten die Siemens AG und zwei Tochtergesellschaften freiwillig unter anderem mögliche Verletzungen der U.S. Export Administration Regulations gegenüber den zuständigen US-Behörden offen.

Wie bereits berichtet, haben die EU-Betrugsbekämpfungsbehörde OLAF, die entsprechende rumänische Behörde DELAF sowie die rumänische Staatsanwaltschaft DNA seit Juli 2009 Betrugsvorwürfe in Zusammenhang mit der Vergabe eines Auftrags im Jahr 2007 an das Unternehmen FORTE Business Services, heute Siemens IT Solutions and Services Rumänien, für die Modernisierung der IT-Infrastruktur der rumänischen Justiz untersucht. Am 2. September 2010 setzte OLAF den Vorgang auf Beobachtungsstatus und entschied, kein förmliches

Verfahren einzuleiten. DELAF übergab den Vorgang an die DNA und stellte ihre eigene Untersuchung ein.

Zu bestimmten Rechtsstreitigkeiten werden gemäß IAS 37, *Rückstellungen, Eventualschulden und Eventualforderungen*, geforderte Angaben nicht gemacht, sofern das Unternehmen zu dem Schluss kommt, dass diese Angaben das Ergebnis des jeweiligen Rechtsstreits ernsthaft beeinträchtigen können.

Zusätzlich zu den oben beschriebenen Untersuchungen und Rechtsstreitigkeiten sind die Siemens AG und ihre Tochtergesellschaften in Zusammenhang mit ihren Geschäftstätigkeiten als diversifizierter, global präserter Konzern in verschiedenen weiteren Rechtsstreitigkeiten und Verfahren als Beklagte benannt worden. Zum Teil sind diese anhängigen Ansprüche bereits offengelegt worden. In einigen dieser Rechtsstreitigkeiten werden Schadensersatzansprüche in unbestimmter Höhe sowie Strafschadensersatz (*Punitive Damages*) geltend gemacht. Zeitweise ist Siemens auch Gegenstand von weiteren über die oben genannten hinausgehenden behördlichen Ermittlungen. Siemens kooperiert mit den zuständigen Behörden in unterschiedlichen Jurisdiktionen und führt, soweit es angebracht ist, interne Untersuchungen bezüglich des behaupteten Fehlverhaltens durch, unterstützt durch interne und externe Rechtsberater. Angesichts der Zahl von Rechtsstreitigkeiten und anderen Verfahren, an denen Siemens beteiligt ist, kann nicht ausgeschlossen werden, dass in einigen dieser Verfahren negative Entscheidungen für Siemens ergehen könnten. Siemens verteidigt sich in Rechtsstreitigkeiten und Verfahren, soweit dies angemessen ist. Eine Prognose von Verfahrensergebnissen ist, insbesondere in Fällen, in denen die Anspruchsteller unbestimmte Schadensersatzansprüche geltend machen, mit erheblichen Schwierigkeiten verbunden; im Hinblick darauf kann Siemens keine Vorhersage darüber treffen, welche Verpflichtungen sich aus solchen Verfahren eventuell ergeben könnten. Eventuelle negative Entscheidungen in solchen Fällen könnten wesentliche Auswirkungen auf die Vermögens-, Finanz- und Ertragslage in einer Berichtsperiode haben. Zum gegenwärtigen Zeitpunkt erwartet Siemens jedoch aus den in diesem Abschnitt nicht separat dargestellten weiteren Rechtsthemen keine wesentlichen negativen Auswirkungen auf die Vermögens-, Finanz- und Ertragslage von Siemens.

## 31 – Zusätzliche Informationen über Finanzinstrumente

Die folgende Tabelle zeigt die Buchwerte aller Kategorien von finanziellen Vermögenswerten und finanziellen Verbindlichkeiten:

|                                                                                           | 30. September |               |
|-------------------------------------------------------------------------------------------|---------------|---------------|
|                                                                                           | 2010          | 2009          |
| <b>Finanzielle Vermögenswerte:</b>                                                        |               |               |
| Darlehen und Forderungen                                                                  | 24.749        | 24.119        |
| Zahlungsmittel und Zahlungsmitteläquivalente                                              | 14.108        | 10.159        |
| Derivate, die die Voraussetzungen für die Bilanzierung einer Sicherungsbeziehung erfüllen | 2.232         | 1.895         |
| Zu Handelszwecken gehaltene finanzielle Vermögenswerte                                    | 1.410         | 976           |
| Zur Veräußerung verfügbare finanzielle Vermögenswerte                                     | 732           | 561           |
|                                                                                           | <b>43.231</b> | <b>37.710</b> |
| <b>Finanzielle Verbindlichkeiten:</b>                                                     |               |               |
| Finanzielle Verbindlichkeiten zu fortgeführten Anschaffungskosten                         | 28.922        | 28.539        |
| Zu Handelszwecken gehaltene finanzielle Verbindlichkeiten                                 | 1.098         | 864           |
| Derivate, die die Voraussetzungen für die Bilanzierung einer Sicherungsbeziehung erfüllen | 164           | 134           |
|                                                                                           | <b>30.184</b> | <b>29.537</b> |

Die folgende Tabelle stellt die Marktwerte sowie die Buchwerte der finanziellen Vermögenswerte und finanziellen Verbindlichkeiten dar, die zu Anschaffungskosten oder fortgeführten Anschaffungskosten bewertet sind.

|                                                                                                      | 30. September 2010 |          | 30. September 2009 |          |
|------------------------------------------------------------------------------------------------------|--------------------|----------|--------------------|----------|
|                                                                                                      | Marktwert          | Buchwert | Marktwert          | Buchwert |
| Finanzielle Vermögenswerte, bewertet zu Anschaffungskosten oder fortgeführten Anschaffungskosten:    |                    |          |                    |          |
| Forderungen aus Lieferungen und Leistungen und sonstige Forderungen <sup>1</sup>                     | 14.111             | 14.111   | 13.951             | 13.951   |
| Forderungen aus Finanzierungsleasing                                                                 | 4.879              | 4.879    | 4.885              | 4.885    |
| Zahlungsmittel und Zahlungsmitteläquivalente                                                         | 14.108             | 14.108   | 10.159             | 10.159   |
| Sonstige nicht derivative finanzielle Vermögenswerte                                                 | 5.759              | 5.759    | 5.283              | 5.283    |
| Zur Veräußerung verfügbare finanzielle Vermögenswerte <sup>2</sup>                                   | –                  | 410      | –                  | 335      |
| Finanzielle Verbindlichkeiten, bewertet zu Anschaffungskosten oder fortgeführten Anschaffungskosten: |                    |          |                    |          |
| Anleihen und Schuldverschreibungen                                                                   | 17.343             | 17.300   | 16.373             | 16.502   |
| Verbindlichkeiten aus Lieferungen und Leistungen                                                     | 7.899              | 7.899    | 7.617              | 7.617    |
| Verbindlichkeiten gegenüber Kreditinstituten und sonstige Finanzschulden                             | 2.439              | 2.442    | 2.941              | 2.942    |
| Verbindlichkeiten aus Finanzierungsleasing                                                           | 169                | 171      | 191                | 194      |
| Sonstige nicht derivative finanzielle Verbindlichkeiten                                              | 1.110              | 1.110    | 1.284              | 1.284    |

- 1 Diese Position setzt sich zusammen aus (i) kurzfristigen *Forderungen aus Lieferungen und Leistungen* (mit Ausnahme von Forderungen aus Finanzierungsleasing) im Geschäftsjahr 2010 in Höhe von 13.186 (im Vj. 12.711) EUR (siehe »Ziffer 12«) sowie (ii) langfristigen *Forderungen aus Lieferungen und Leistungen* im Geschäftsjahr 2010 in Höhe von 531 (im Vj. 453) EUR (siehe »Ziffer 20«) sowie (iii) aus Forderungen im Geschäftsjahr 2010 in Höhe von 394 (im Vj. 787) EUR, die in *Sonstige finanzielle Vermögenswerte* enthalten sind, siehe »Ziffer 20«.
- 2 Diese Position beinhaltet zur Veräußerung verfügbare Eigenkapitalinstrumente, deren beizulegende Zeitwerte von Siemens nicht zuverlässig ermittelt werden konnten und die zu Anschaffungskosten bewertet werden.

Die Marktwerte von Zahlungsmitteln und Zahlungsmitteläquivalenten, von kurzfristigen Forderungen, von Verbindlichkeiten aus Lieferungen und Leistungen, von sonstigen kurzfristigen finanziellen Verbindlichkeiten, begebenen kurzfristigen Schuldverschreibungen sowie unter revolvingenden Kreditfazilitäten aufgenommenen Mitteln entsprechen annähernd den Buchwerten. Der Grund dafür ist vor allem die kurze Laufzeit solcher Instrumente.

Das Unternehmen bewertet langfristige festverzinsliche und variabel verzinsliche Forderungen, inklusive der Forderungen aus Finanzierungsleasing, auf der Basis verschiedener Parameter, wie Zinssätze, spezifischer Länderrisiken, der individuellen Bonität der Kunden und der Risikostruktur des Finanzierungsgeschäfts. Anhand dieser Bewertung bildet Siemens die

Wertberichtigungen auf diese Forderungen. Demnach entsprechen die Buchwerte dieser Forderungen, abzüglich der gebildeten Wertberichtigungen, zum 30. September 2010 und 2009 annähernd ihren Marktwerten.

Der Marktwert der börsennotierten Anleihen und Schuldverschreibungen basiert auf den Kursnotierungen zum Bilanzstichtag. Den Marktwert von nicht börsennotierten Anleihen und Schuldverschreibungen, Verbindlichkeiten gegenüber Kreditinstituten und sonstigen Finanzschulden, Verbindlichkeiten aus Finanzierungsleasing sowie sonstigen langfristigen finanziellen Verbindlichkeiten bestimmt Siemens durch Abzinsung der erwarteten zukünftigen Zahlungsströme mit den für ähnliche Finanzschulden mit vergleichbarer Restlaufzeit aktuell geltenden Zinsen.

Die zum Marktwert bewerteten finanziellen Vermögenswerte und finanziellen Verbindlichkeiten zeigt die folgende Tabelle:

|                                                                                                        | 30. September |       |
|--------------------------------------------------------------------------------------------------------|---------------|-------|
|                                                                                                        | 2010          | 2009  |
| Finanzielle Vermögenswerte, bewertet zum Marktwert                                                     |               |       |
| Zur Veräußerung verfügbare finanzielle Vermögenswerte                                                  | 322           | 226   |
| Derivative Finanzinstrumente                                                                           | 3.642         | 2.871 |
| <i>Derivate, die nicht die Voraussetzungen für die Bilanzierung einer Sicherungsbeziehung erfüllen</i> |               |       |
| <i>In Verbindung mit Fair Value Hedges</i>                                                             | 1.314         | 820   |
| <i>Währungsderivate</i>                                                                                | 1.936         | 1.474 |
| <i>Zinsderivate</i>                                                                                    | 9             | 10    |
| <i>In Verbindung mit Cashflow Hedges</i>                                                               | 1.927         | 1.464 |
| <i>Währungsderivate</i>                                                                                | 296           | 421   |
| <i>Zinsderivate</i>                                                                                    | 295           | 413   |
| <i>Rohstoffderivate</i>                                                                                | –             | 8     |
| <i>Eingebettete Derivate</i>                                                                           | 1             | –     |
|                                                                                                        | 96            | 156   |
| Finanzielle Verbindlichkeiten, bewertet zum Marktwert                                                  |               |       |
| Derivative Finanzinstrumente                                                                           | 1.262         | 998   |
| <i>Derivate, die nicht die Voraussetzungen für die Bilanzierung einer Sicherungsbeziehung erfüllen</i> |               |       |
| <i>In Verbindung mit Fair Value Hedges</i>                                                             | 998           | 731   |
| <i>Währungsderivate</i>                                                                                | 11            | 4     |
| <i>Zinsderivate</i>                                                                                    | 11            | 4     |
| <i>In Verbindung mit Cashflow Hedges</i>                                                               | –             | –     |
| <i>Währungsderivate</i>                                                                                | 153           | 130   |
| <i>Zinsderivate</i>                                                                                    | 137           | 130   |
| <i>Rohstoffderivate</i>                                                                                | 16            | –     |
| <i>Eingebettete Derivate</i>                                                                           | –             | –     |
|                                                                                                        | 100           | 133   |

Bei den *Zur Veräußerung verfügbaren finanziellen Vermögenswerten* setzt Siemens als Marktwert den Kurswert in einem aktiven Markt an.

Die Gesellschaft begrenzt Ausfallrisiken aus derivativen Finanzinstrumenten durch eine sorgfältige Auswahl der Vertragspartner. Der Abschluss von derivativen Finanzinstrumenten erfolgt daher grundsätzlich mit Finanzinstituten mit einem Rating von mindestens »Investment Grade«. Bei der Bewertung der derivativen Finanzinstrumente zum Marktwert fließen alle Faktoren ein, die Marktteilnehmer berücksichtigen würden, einschließlich einer angemessenen Berücksichtigung der Kreditrisiken der Handelspartner. Dadurch ist sichergestellt, dass sich auch Veränderungen der Kreditrisiken der Handelspartner adäquat in der Bewertung der derivativen Finanzinstrumente und somit im Konzernabschluss widerspiegeln. Wie die Marktwerte derivativer Finanzinstrumente im Einzelnen ermittelt werden, hängt von der Art des Instruments ab:

**Zinsderivate** – Der Marktwert von Zinsderivaten (zum Beispiel Zinsswaps) bestimmt sich durch Abzinsung der erwarteten zukünftigen Zahlungsströme über die Restlaufzeit des Kontrakts auf der Basis aktueller Marktzinsen und der Zinsstrukturkurve. Zinsoptionen werden mit ihrem Kurswert bilanziert oder zu einem auf der Grundlage eines Optionspreismodells errechneten Schätzwert ausgewiesen.

**Währungsderivate** – Der Marktwert von Devisentermingeschäften bestimmt sich in Abhängigkeit von den Devisenterminkursen. Währungsoptionen bilanziert Siemens mit ihrem Kurswert oder weist sie zu einem auf der Grundlage eines Optionspreismodells errechneten Schätzwert aus.

**Rohstoffderivate** – Der Marktwert von Rohstoffswaps bestimmt sich in Abhängigkeit von den Terminkursen der Rohstoffe. Rohstoffoptionen bewertet Siemens mit ihrem Kurswert oder weist sie zu einem auf der Grundlage von Optionspreismodellen errechneten Schätzwert aus.

**Credit Default Swaps** – Der Marktwert von Credit Default Swaps bestimmt sich aus dem Vergleich der abgezinsten zukünftigen Zahlungsströme auf der Basis aktueller Bankkonditionen mit den abgezinsten erwarteten zukünftigen Zahlungsströmen auf der Basis der Vertragskonditionen.

Bei der Bestimmung des Marktwerts eines derivativen Finanzinstruments bleiben Kompensationseffekte aus den Grundgeschäften (zum Beispiel schwebende Geschäfte und antizipierte Transaktionen) unberücksichtigt.

Die folgende Tabelle zeigt eine Zuordnung der zum Marktwert bewerteten finanziellen Vermögenswerte und finanziellen Verbindlichkeiten zu den drei Stufen der Fair-Value-Hierarchie nach IFRS 7.

|                                                       | 30. September 2010 |         |         |        |
|-------------------------------------------------------|--------------------|---------|---------|--------|
|                                                       | Stufe 1            | Stufe 2 | Stufe 3 | Gesamt |
| Finanzielle Vermögenswerte, bewertet zum Marktwert    |                    |         |         |        |
| Zur Veräußerung verfügbare finanzielle Vermögenswerte | 322                | –       | –       | 322    |
| Derivative Finanzinstrumente                          | –                  | 3.642   | –       | 3.642  |
| Gesamt                                                | 322                | 3.642   | –       | 3.964  |
| Finanzielle Verbindlichkeiten, bewertet zum Marktwert |                    |         |         |        |
| Derivative Finanzinstrumente                          | –                  | 1.262   | –       | 1.262  |

|                                                       | 30. September 2009 |         |         |        |
|-------------------------------------------------------|--------------------|---------|---------|--------|
|                                                       | Stufe 1            | Stufe 2 | Stufe 3 | Gesamt |
| Finanzielle Vermögenswerte, bewertet zum Marktwert    |                    |         |         |        |
| Zur Veräußerung verfügbare finanzielle Vermögenswerte | 226                | –       | –       | 226    |
| Derivative Finanzinstrumente                          | –                  | 2.871   | –       | 2.871  |
| Gesamt                                                | 226                | 2.871   | –       | 3.097  |
| Finanzielle Verbindlichkeiten, bewertet zum Marktwert |                    |         |         |        |
| Derivative Finanzinstrumente                          | –                  | 998     | –       | 998    |

Die Stufen der Fair-Value-Hierarchie und ihre Anwendung auf unsere finanziellen Vermögenswerte und Verbindlichkeiten sind im Folgenden beschrieben:

- Stufe 1:** Notierte Marktpreise für identische Vermögenswerte oder Verbindlichkeiten auf aktiven Märkten;
- Stufe 2:** Andere Bewertungsfaktoren als notierte Marktpreise, die direkt (zum Beispiel Preise) oder indirekt (zum Beispiel abgeleitet aus Preisen) beobachtbar sind, und
- Stufe 3:** Bewertungsfaktoren für Vermögenswerte und Verbindlichkeiten, die nicht auf beobachtbaren Marktdaten basieren.

Die Nettogewinne beziehungsweise -verluste aus Finanzinstrumenten sind wie folgt:

|                                                                                          | Geschäftsjahresende<br>30. September |       |
|------------------------------------------------------------------------------------------|--------------------------------------|-------|
|                                                                                          | 2010                                 | 2009  |
| Zahlungsmittel und Zahlungsmitteläquivalente                                             | – 34                                 | 7     |
| Zur Veräußerung verfügbare finanzielle Vermögenswerte                                    | 16                                   | – 44  |
| Darlehen und Forderungen                                                                 | – 87                                 | – 419 |
| Finanzielle Verbindlichkeiten zu fortgeführten Anschaffungskosten                        | – 283                                | 302   |
| Zu Handelszwecken gehaltene finanzielle Vermögenswerte und finanzielle Verbindlichkeiten | – 665                                | 34    |

Nettogewinne (im Vj. Nettoverluste) aus *Zur Veräußerung verfügbare finanzielle Vermögenswerte* umfassen Wertminderungen, Gewinne oder Verluste aus der Ausbuchung und den ineffektiven Teil aus Fair Value Hedges. Für den Betrag unrealisierter Gewinne oder Verluste aus *Zur Veräußerung verfügbaren finanziellen Vermögenswerten*, der im Geschäftsjahr direkt im Eigenkapital erfasst wurde, und den Betrag, der dem Eigenkapital entnommen und im Geschäftsjahr ergebniswirksam erfasst wurde, siehe *Sonstiges Ergebnis* in »Ziffer 27«.

Nettoverluste aus Darlehen und Forderungen enthalten Veränderungen in den Wertberichtigungen, Gewinne oder Verluste aus der Ausbuchung sowie Zahlungseingänge und Wertaufholungen auf ursprünglich abgeschriebene Darlehen und Forderungen.

Nettoverluste (im Vj. Nettogewinne) aus finanziellen Verbindlichkeiten zu fortgeführten Anschaffungskosten setzen sich aus Gewinnen oder Verlusten aus der Ausbuchung und dem ineffektiven Teil aus Fair Value Hedges zusammen.

Nettoverluste (im Vj. Nettogewinne) aus zu Handelszwecken gehaltenen finanziellen Vermögenswerten und finanziellen Verbindlichkeiten enthalten Marktwertveränderungen der derivativen Finanzinstrumente (einschließlich Zinserträgen und -aufwendungen), für die die Regelungen für die Bilanzierung einer Sicherungsbeziehung nicht angewendet werden.

Die dargestellten Beträge umfassen Währungsgewinne und -verluste aus der Realisierung sowie aus der Bewertung der oben genannten finanziellen Vermögenswerte und Verbindlichkeiten.

### Sicherheiten

Siemens hält Wertpapiere als Sicherheiten im Rahmen von Rückkaufvereinbarungen (Reverse Repurchase Agreements) und darf diese Wertpapiere veräußern oder verpfänden. Der beizulegende Zeitwert dieser Sicherheiten beträgt zum 30. September 2010 2.042 (im Vj. 716) EUR. Siemens hat zum 30. September 2010 von dem Recht zur Weiterveräußerung oder Verpfändung keinen Gebrauch gemacht. Zum 30. September 2010 wurden von Siemens finanzielle Vermögenswerte in Höhe von 537 (im Vj. 482) EUR als Sicherheiten gestellt.

## 32 – Derivative Finanzinstrumente und Sicherungsaktivitäten

Im Rahmen des Risikomanagements setzt das Unternehmen eine Vielzahl von derivativen Finanzinstrumenten ein, um die Risiken, die hauptsächlich aus Wechselkurs-, Zins- und Rohstoffpreisschwankungen sowie aus Kreditrisiken resultieren, zu begrenzen. Für weitere Informationen zu den Risikomanagementstrategien bei Siemens sowie zum Einsatz von derivativen Finanzinstrumenten mit dem Ziel, diese Risiken zu begrenzen oder auszuschalten, siehe auch »Ziffer 33«.

Die Marktwerte der einzelnen Arten von derivativen Finanzinstrumenten stellen sich wie folgt dar:

|                                              | 30. September 2010 |              | 30. September 2009 |            |
|----------------------------------------------|--------------------|--------------|--------------------|------------|
|                                              | Aktiva             | Passiva      | Aktiva             | Passiva    |
| Devisentermingeschäfte                       | 858                | 423          | 735                | 462        |
| Zinsswaps und kombinierte Zins-Währungsswaps | 2.317              | 416          | 1.764              | 204        |
| Rohstoff-Swaps                               | 78                 | 11           | 43                 | 23         |
| Eingebettete Derivate                        | 96                 | 100          | 156                | 133        |
| Optionen                                     | 289                | 308          | 170                | 172        |
| Sonstige                                     | 4                  | 4            | 3                  | 4          |
|                                              | <b>3.642</b>       | <b>1.262</b> | <b>2.871</b>       | <b>998</b> |



### Währungsrisikomanagement

Wie unter »Ziffer 33« beschrieben, setzt das Unternehmen verschiedene derivative Finanzinstrumente ein, um Währungsrisiken zu begrenzen oder zu eliminieren.

#### Derivative Finanzinstrumente, die nicht die Voraussetzungen für die Bilanzierung einer Sicherungsbeziehung erfüllen

Zur Absicherung der Risiken, die aus den Schwankungen der in Fremdwährung lautenden Forderungen, Verbindlichkeiten, Schulden und schwebenden Geschäften sowie antizipierten Transaktionen resultieren, verfolgt das Unternehmen vorwiegend einen konzernweiten Portfolioansatz. Dieser besteht darin, die konzernweiten Risiken zentral zu bündeln und durch den Einsatz verschiedener derivativer Finanzinstrumente abzusichern. Dabei handelt es sich in erster Linie um Devisentermingeschäfte sowie um Optionen. Eine solche Strategie erfüllt nicht die Voraussetzungen für die Bilanzierung einer Sicherungsbeziehung nach IAS 39, *Financial Instruments: Recognition and Measurement*. Dementsprechend erfasst Siemens alle diese Derivate zum Marktwert in der Konzernbilanz und weist sie unter *Sonstige kurzfristige finanzielle Vermögenswerte/Verbindlichkeiten* oder *Sonstige finanzielle Vermögenswerte/Verbindlichkeiten* aus. Die Veränderungen des Marktwerts bucht das Unternehmen erfolgswirksam.

Siemens bilanziert auch eingebettete Währungsderivate, die in bestimmten Kauf- oder Verkaufsverträgen enthalten sind. Diese lauten weder auf eine der funktionalen Währungen der Vertragspartner noch auf eine Währung, die in dem wirtschaftlichen Umfeld, in dem die Transaktion stattfindet, üblicherweise verwendet wird. Die Gewinne oder Verluste aus eingebetteten Währungsderivaten weist das Unternehmen unter den Umsatzkosten in der Konzern-Gewinn- und Verlustrechnung aus.

#### Sicherungsaktivitäten

Die operativen Einheiten des Unternehmens wenden für bestimmte wesentliche, in Fremdwährung lautende antizipierte Transaktionen und schwebende Geschäfte die Regelungen für die Bilanzierung einer Sicherungsbeziehung an. Siemens setzt in erster Linie Devisentermingeschäfte ein, um das Risiko von Schwankungen zukünftiger Zahlungsströme aus geplanten Käufen und Verkäufen sowie schwebenden Geschäften zu begrenzen. Dieses Risiko resultiert vor allem aus auf US-Dollar lautenden langfristigen Verträgen (Projektgeschäft) und aus auf US-Dollar lautendem Produktgeschäft der operativen Einheiten.

**Cashflow Hedges** – Die Veränderungen des Marktwerts von als Fremdwährungs-Cashflow-Hedges klassifizierten Devisentermingeschäften weist Siemens wie folgt aus: Der effektive Teil der Marktwertveränderungen wird unter dem *Sonstigen Ergebnis* erfasst, während der ineffektive Teil in der Gewinn- und Verlustrechnung gezeigt wird. Der erfolgswirksam erfasste ineffektive Teil aus Cashflow Hedges im Währungsbereich betrug zum 30. September 2010 – 15 (im Vj. 6) EUR. Im Geschäftsjahr 2010 wurde ein Nettogewinn in Höhe von 1 (im Vj. Nettoverlust von 6) EUR aus dem *Sonstigen Ergebnis* in die *Umsatzkosten* umgegliedert, da das Eintreten der geplanten Transaktion unwahrscheinlich geworden war. Die Entwicklung der Position *Sonstiges Ergebnis* aus der Veränderung des Marktwerts dieser Geschäfte sowie aus der ergebniswirksamen Umbuchung findet sich in »Ziffer 27«.

Die Gesellschaft wird voraussichtlich 87 EUR der in *Sonstiges Ergebnis* ausgewiesenen Nettogewinne im Geschäftsjahr 2011 in die *Umsatzkosten* reklassifizieren, sobald die abgesicherten Fremdwährungstransaktionen erfolgswirksam werden.

Zum 30. September 2010 hatte Siemens derivative Finanzinstrumente mit einer maximalen Laufzeit von 195 Monaten im Bestand, um die Währungsrisiken in Zusammenhang mit geplanten Transaktionen in Fremdwährung abzusichern.

**Fair Value Hedges** – Zum 30. September 2010 und 2009 sicherte das Unternehmen schwebende Geschäfte mithilfe von Devisentermingeschäften ab. Diese klassifizierte es als Foreign Currency Fair Value Hedges zukünftiger Verkäufe – vor allem in Zusammenhang mit dem Projektgeschäft des Unternehmens – und in geringerem Maße auch zukünftiger Käufe. Die gesicherten schwebenden Geschäfte wies Siemens zum 30. September 2010, da es die Regelungen für die Bilanzierung einer Sicherungsbeziehung anwandte, unter den finanziellen Vermögenswerten in Höhe von 17 (im Vj. 13) EUR und unter den finanziellen Verbindlichkeiten in Höhe von 14 (im Vj. 23) EUR aus. Aus den Marktwertänderungen der Devisentermingeschäfte ergaben sich Verluste in Höhe von 15 (im Vj. Gewinne von 2) EUR. Diese Effekte standen in Zusammenhang mit Gewinnen aus den schwebenden Geschäften in Höhe von 15 (im Vj. Verluste von 2) EUR. Die Veränderungen des Marktwerts der Devisentermingeschäfte sowie die der schwebenden Geschäfte buchte Siemens unter den *Umsatzkosten*.

## Zinsrisikomanagement

Das Zinsrisiko resultiert aus der Sensitivität von finanziellen Vermögenswerten und Verbindlichkeiten in Bezug auf Veränderungen des Marktzinsebeneaus. Das Unternehmen ist bestrebt, solche Risiken durch den Einsatz von Zinsderivaten, wie Zinsswaps (siehe »Ziffer 33«), Optionen und in geringem Umfang auch Zins-Währungs-Swaps und Zins-Futures sowie Forward Rate Agreements zu begrenzen.

### Derivative Finanzinstrumente, die nicht die Voraussetzungen für die Bilanzierung einer Sicherungsbeziehung erfüllen

Beginnend mit dem ersten Quartal des Geschäftsjahrs 2010 wurde unter Berücksichtigung des derzeitigen Finanzmarktumfelds das Zinsrisikomanagement des Konzerns ohne SFS-Geschäft neu ausgerichtet. Im Rahmen dieses portfolio-basierten Ansatzes nutzt Siemens derivative Finanzinstrumente zur aktiven Steuerung des Zinsrisikos unter Zugrundelegung eines Orientierungswerts, der aus mittelfristigen Zinsswaps und Zinstermingeschäften besteht. Im Vergleich zum bisherigen Zins-Overlay-Management kann der Orientierungswert-Ansatz zu längeren Zinsbindungen der Derivate sowie einem höheren Nominalvolumen führen. Das Zinsrisikomanagement bezüglich des SFS-Geschäfts erfolgt weiterhin als separater Portfolioansatz unter Berücksichtigung der Zinsstruktur der Finanzaktiva und -passiva von SFS. Beide Ansätze erfüllen nicht die Voraussetzungen für die Bilanzierung einer Sicherungsbeziehung nach IAS 39. Dementsprechend führt Siemens alle diesbezüglich eingesetzten Zinsderivate zum Marktwert und weist sie entweder unter *Sonstige kurzfristige finanzielle Vermögenswerte/Verbindlichkeiten* oder *Sonstige finanzielle Vermögenswerte/Verbindlichkeiten* aus. Die Veränderungen des Marktwerts bucht das Unternehmen erfolgswirksam im *Finanzergebnis*. Der Saldo aus erhaltenen und geleisteten Zahlungen im Rahmen von Zinsswaps, die der Absicherung dienen, wird ebenfalls im *Finanzergebnis* erfasst.

### Fair Value Hedges für festverzinsliche Finanzschulden

Auf der Grundlage der während der Geschäftsjahre 2010 und 2009 bestehenden Swap-Kontrakte zahlt das Unternehmen variable Zinsen auf einen bestimmten Kapitalbetrag und erhält im Gegenzug dafür feste Zinsen auf denselben Kapitalbetrag. Diese Zinsswaps gleichen die Auswirkungen zukünftiger Veränderungen der Zinssätze auf die Marktwerte der zugrunde liegenden festverzinslichen Finanzschulden aus. Siemens weist die Zinsswaps zum Marktwert in der Konzernbilanz aus. Den entsprechenden Anteil der dadurch abgesicherten festverzinslichen Finanzschulden führt das Unternehmen als

Summe aus deren Buchwert und einer Wertkorrektur für die zinsrisikobedingte Veränderung ihres Marktwerts. Diese Veränderungen sowie die entsprechenden Korrekturen des Buchwerts der abgesicherten festverzinslichen Finanzschulden werden in der Position *Finanzergebnis* in der Konzern-Gewinn- und Verlustrechnung erfasst. Aus den Buchwertanpassungen der Finanzschulden ergab sich im Geschäftsjahr ein Verlust von 498 (im Vj. 848) EUR, während im gleichen Zeitraum Gewinne bei den zugeordneten Sicherungsgeschäften von 521 (im Vj. 931) EUR realisiert wurden. Im Geschäftsjahr 2010 wurde demnach ein Nettoergebnis, das den ineffektiven Teil der Sicherungsbeziehung darstellt, in Höhe von 23 (im Vj. 83) EUR erfasst. Den Saldo aus erhaltenen und geleisteten Zahlungen im Rahmen solcher Zinsswaps weist Siemens im Zinsertrag beziehungsweise Zinsaufwand aus.

Im Rahmen von Zinsswaps zahlte Siemens variable Zinsen (Durchschnittssatz zum 30. September 2010 beziehungsweise 2009: 0,8% beziehungsweise 0,9%) und erhielt Festzinsszahlungen (Durchschnittssatz zum 30. September 2010 beziehungsweise 2009: 5,3% beziehungsweise 5,4%). Das zum 30. September 2010 abgesicherte Volumen der Finanzschulden betrug 15.299 (im Vj. 15.565) EUR. Damit wurden zum 30. September 2010 91 (im Vj. 94)% des Anleihenbestands des Unternehmens von festverzinslich auf variabel verzinslich getauscht. Die Laufzeiten der Swap-Kontrakte sind auf die Laufzeiten der abgesicherten Positionen abgestimmt. Der Nettomarktwert der Zinsswaps, die Finanzschulden absicherten, betrug – ohne Berücksichtigung abgegrenzter Zinsen – zum 30. September 2010 1.665 (im Vj. 1.224) EUR.

### Cashflow Hedges für revolving Termineinlagen

In den Geschäftsjahren 2010 und 2009 wandte Siemens Cashflow Hedge Accounting für revolving Termineinlagen an. Um die Auswirkungen zukünftiger Veränderungen der Zinssätze auf die Zahlungsströme der zugrunde liegenden revolving Termineinlagen auszugleichen, wurde ein Swap-Kontrakt abgeschlossen, aus dem das Unternehmen variable Zinsen zahlt und im Gegenzug einen bestimmten festen Zinssatz erhält. Als der Swap im Juni 2010 auslief, wurde die Bilanzierung einer Sicherungsbeziehung beendet. Solange Cashflow Hedge Accounting angewendet wurde, ist der Zinsswap zum Marktwert bilanziert worden, und der effektive Teil der Marktwertveränderungen wurde unter *Sonstiges Ergebnis* gezeigt; der ineffektive Teil der Marktwertveränderungen wurde erfolgswirksam erfasst. Aus den Cashflow Hedges für revolving Termineinlagen ergaben sich in den Geschäftsjahren 2010 und 2009 keine erfolgswirksam zu erfassenden Ineffektivitäten. Den Saldo aus erhaltenen und geleisteten Zahlungen

auf solche Zinsswaps zeigt Siemens im Zinsertrag beziehungsweise Zinsaufwand.

#### **Cashflow Hedges für ein variabel verzinsliches Darlehen**

Zum 30. September 2010 wandte Siemens Cashflow Hedge Accounting für 50% eines variabel verzinslichen US-Dollar-Darlehens an. Um von den niedrigen Zinssätzen in den USA zu profitieren, wurden Zinsswap-Kontrakte abgeschlossen, für die das Unternehmen feste Zinsen zahlt und im Gegenzug variable Zinsen erhält. Diese Zinsswaps gleichen Auswirkungen zukünftiger Veränderungen der Zinssätze auf die Zahlungsströme des zugrunde liegenden variabel verzinslichen Darlehens aus. Das Unternehmen weist die Zinsswaps zum Marktwert aus. Der effektive Teil der Marktwertveränderungen von als Cashflow Hedges klassifizierten Zinsswaps wird unter *Sonstiges Ergebnis* gezeigt; der ineffektive Teil der Marktwertveränderungen wird erfolgswirksam erfasst. Aus den Cashflow Hedges für das variabel verzinsliche Darlehen ergaben sich im Geschäftsjahr 2010 keine erfolgswirksam auszuweisenden Ineffektivitäten. Den Saldo aus erhaltenen und geleisteten Zahlungen aus solchen Zinsswaps zeigt Siemens im Zinsertrag beziehungsweise Zinsaufwand.

#### **Rohstoffpreisrisikomanagement**

Wie unter »Ziffer 33« beschrieben, setzt das Unternehmen verschiedene derivative Finanzinstrumente ein, um Preisrisiken aus der Beschaffung von Rohstoffen zu begrenzen oder zu eliminieren.

#### **Derivative Finanzinstrumente, die nicht die Voraussetzungen für die Bilanzierung einer Sicherungsbeziehung erfüllen**

Das Unternehmen nutzt teilweise einen Portfolioansatz, um die konzernweiten Risiken aus Rohstoffpreisschwankungen bei schwebenden Geschäften und antizipierten Transaktionen durch Rohstoff-Swaps und Rohstoff-Optionen abzusichern. Da eine solche Strategie nicht die Voraussetzungen für die Bilanzierung einer Sicherungsbeziehung nach IAS 39, *Financial Instruments Recognition and Measurement*, erfüllt, erfolgt eine erfolgswirksame Erfassung der Marktwertänderungen der derivativen Finanzinstrumente und ein Ausweis des Marktwerts in der Konzernbilanz unter *Sonstige kurzfristige finanzielle Vermögenswerte/Verbindlichkeiten* oder *Sonstige finanzielle Vermögenswerte/Verbindlichkeiten*.

#### **Sicherungsaktivitäten in Zusammenhang mit Cashflow Hedges**

Seit Juni 2010 wendet der Zentraleinkauf des Unternehmens die Bilanzierung von Cashflow Hedge Accounting (Absicherung von Zahlungsströmen) für bestimmte schwebende Geschäfte über den Einkauf von Kupfer an. Die Veränderung der Marktwerte der Swaps, die für die Bilanzierung einer Sicherungsbeziehung eingesetzt werden, werden wie folgt ausgewiesen: Der effektive Teil der Marktwertänderungen wird unter *Sonstiges Ergebnis* erfasst, während der ineffektive Teil in der Gewinn- und Verlustrechnung gezeigt wird. Zum 30. September 2010 bestand kein ineffektiver erfolgswirksam auszuweisender Anteil. Im Geschäftsjahr 2010 reklassifizierte das Unternehmen keine Gewinne oder Verluste aus *Sonstiges Ergebnis* in die *Umsatzkosten*, weil das Eintreten der geplanten, gesicherten Transaktion unwahrscheinlich wurde. Die Entwicklung der Position *Sonstiges Ergebnis* aus der Veränderung des Marktwerts dieser Geschäfte sowie aus der ergebniswirksamen Umbuchung findet sich in »Ziffer 27«.

Im Geschäftsjahr 2011 werden voraussichtlich 1 EUR der in *Sonstiges Ergebnis* ausgewiesenen Nettogewinne in die *Umsatzkosten* reklassifiziert, wenn auch der Verbrauch der gesicherten Rohstoffe in den *Umsatzkosten* erfasst wird. Zum 30. September 2010 betrug die maximale Laufzeit, über die die Gesellschaft ihre zukünftigen Rohstoffkäufe sichert, zwölf Monate.

## **33 – Management von finanziellen Risiken**

#### **Finanzmarktrisiken**

Das Management von finanziellen Risiken ist ein integraler Bestandteil der Planung und Umsetzung unserer Geschäftsstrategien. Die zugehörige Unternehmenspolitik wird durch den Vorstand vorgegeben. Entsprechend der Organisations- und Verantwortungshierarchie bei Siemens ist das jeweilige Management unserer Sektoren, Sektorübergreifenden Geschäfte, regionalen Cluster und Zentralabteilungen verpflichtet, ein System zur Steuerung von finanziellen Risiken zu implementieren, das auf sein spezifisches Geschäft und seine Verantwortlichkeiten zugeschnitten ist und dabei den durch den Vorstand vorgegebenen übergreifenden Grundsätzen entspricht.

Zunehmende Marktpreisschwankungen können für Siemens zu einer signifikanten Zahlungsmittel- sowie Ergebnisvolatilität führen. Änderungen der Fremdwährungskurse, der Zinssätze sowie der Rohstoffpreise und Aktienkurse beeinflussen sowohl das weltweite operative Geschäft als auch die Investitions- und Finanzierungsaktivitäten. Um die Allokation der finanziellen Ressourcen innerhalb des Konzerns zu optimieren und eine möglichst hohe Rendite für seine Aktionäre sicherzustellen, identifiziert, analysiert und steuert Siemens vorausschauend die hiermit verbundenen Finanzmarktrisiken. Das Unternehmen versucht in erster Linie, diese Risiken im Rahmen der laufenden Geschäfts- und Finanzaktivitäten zu steuern und zu überwachen. Wenn es notwendig ist, steuert es die Risiken auch mithilfe derivativer Finanzinstrumente.

Aus den verschiedenen Methoden zur Risikoanalyse und des Risikomanagements implementierte Siemens das Konzept des Value at Risk (VaR) auf Basis des parametrischen Varianz-Kovarianz-Ansatzes. Das VaR-Konzept ermöglicht die Quantifizierung von Marktpreisrisiken, basierend auf historischen Volatilitäten und Korrelationen verschiedener Risikofaktoren unter den Annahmen des parametrischen Varianz-Kovarianz-VaR-Modells. Der VaR für alle definierten Finanzmarktrisiken wurde basierend auf folgenden Parametern berechnet:

- > historische Volatilitäten und Korrelationen,
- > zehn Tage Haltedauer sowie
- > 99,5% Konfidenzniveau.

Die tatsächlichen Auswirkungen auf die Konzern-Gewinn- und Verlustrechnung können infolge grundlegender konzeptioneller Unterschiede von den ermittelten VaR-Werten deutlich abweichen. Die Konzern-Gewinn- und Verlustrechnung wird auf Basis der IFRS erstellt. Die VaR-Werte basieren auf einem rein finanzwirtschaftlichen Modell, das einen finanzwirtschaftlichen Verlust errechnet, der bei einer Haltedauer von zehn Tagen mit einer Wahrscheinlichkeit von 99,5% einen vorgegebenen VaR nicht übersteigen wird. Das VaR-Konzept wird für die interne Steuerung der Treasury-Aktivitäten verwendet.

Obwohl der VaR ein bedeutendes Konzept zur Messung von Marktpreisrisiken ist, können die Annahmen, auf denen das Modell basiert, zu den folgenden Einschränkungen führen: Eine Haltedauer von zehn Tagen unterstellt, dass es möglich ist, die Risiken innerhalb dieser Periode zu neutralisieren. Dies stellt eine in den meisten Fällen realistische Annahme dar, die

aber nicht erfüllt sein kann, sollten für einen anhaltenden Zeitraum illiquide Märkte vorliegen. Ein Konfidenzniveau von 99,5% macht keine Angaben zu den Verlusten, die über dieses Konfidenzniveau hinaus auftreten können. Innerhalb des Modells existiert eine statistische Wahrscheinlichkeit von 0,5%, dass Verluste eintreten, die den berechneten VaR übersteigen. Bei der Verwendung von historischen Daten als Basis für die Abschätzung des statistischen Verhaltens der relevanten Märkte und damit der Quantifizierung der möglichen Bandbreite der künftigen Ergebnisse aus diesem statistischen Verhalten besteht die Möglichkeit, dass nicht alle möglichen Entwicklungen abgedeckt sind. Dies gilt im Besonderen für das Auftreten außergewöhnlicher Ereignisse.

Alle marktsensitiven Vermögensanlagen des Konzerns, die in Zusammenhang mit Pensionsplänen stehen, einschließlich der Anlagen in Aktien oder der zinstragenden Investments, sind nicht Gegenstand der folgenden quantitativen und qualitativen Angaben. Weitere Informationen hierzu finden sich unter »Ziffer 24«. SFS unterhält in geringem Umfang ein Handelsportfolio, dessen Risikopositionen sich in engen Grenzen bewegen. Zum 30. September 2010 und 2009 lag der VaR dieses Portfolios nahe null.

### Fremdwährungsrisiken

#### Transaktionsrisiken und Fremdwährungsmanagement

Aufgrund seiner internationalen Ausrichtung ist Siemens im Rahmen der gewöhnlichen Geschäftstätigkeit Währungsrisiken, insbesondere Wechselkursschwankungen zwischen EUR und US-Dollar, ausgesetzt. Um diese Risiken zu begrenzen oder auszuschalten, verfolgt das Unternehmen – wie unten dargestellt – verschiedene Strategien, die auch den Einsatz von derivativen Finanzinstrumenten vorsehen.

Wechselkursschwankungen können zu unerwünschten und unvorhersehbaren Volatilitäten von Ergebnissen und Zahlungsmittelflüssen führen. Jede Siemens-Einheit ist Risiken in Zusammenhang mit Wechselkursänderungen ausgesetzt, wenn sie Geschäfte mit internationalen Vertragspartnern abschließt und daraus in der Zukunft Zahlungsströme entstehen, die nicht der funktionalen Währung der jeweiligen Siemens-Einheit entsprechen. Das Fremdwährungsrisiko wird zum Teil dadurch ausgeglichen, dass Güter, Rohstoffe und Dienstleistungen in der entsprechenden Fremdwährung beschafft sowie in den lokalen Märkten produziert beziehungsweise andere Leistungsbeiträge entlang der Wertschöpfungskette erbracht werden.

Den operativen Einheiten ist es verboten, aus spekulativen Gründen Finanzmittel in Fremdwährungen aufzunehmen oder anzulegen. Konzerninterne Finanzierungen oder Investitionen werden bevorzugt in der jeweiligen funktionalen Währung oder auf währungsgesicherter Basis durchgeführt.

Siemens hat seit mehreren Jahren ein bewährtes Fremdwährungsrisikomanagementsystem. Jede Siemens-Einheit ist dafür verantwortlich, ihre transaktionsbezogenen Fremdwährungsrisiken zu erfassen, zu bewerten, zu überwachen, darüber Bericht zu erstatten und abzusichern. Den konzeptionellen Rahmen für die Identifizierung und Bestimmung der einzelnen Nettowährungspositionen gibt die entsprechende Richtlinie für die Divisionen und Einheiten verbindlich vor. Konzernweit ist jede Einheit dazu verpflichtet, diese anzuwenden und die jeweilige Nettowährungsposition in einer engen Bandbreite von mindestens 75 %, aber nicht mehr als 100 % abzusichern. Zusätzlich stellt diese Richtlinie das Rahmenwerk für die Organisationsstruktur, das für das Fremdwährungsmanagement notwendig ist, zur Verfügung. Es schlägt Sicherungsstrategien vor und definiert die für die Einheiten verfügbaren Sicherungsinstrumente: Forward-Kontrakte, Währungsoptionen sowie Stop-Loss-Orders. Die Einheiten von Siemens schließen, sofern es nicht im Widerspruch zu länderspezifischen Regelungen steht, ihre Sicherungstransaktionen intern mit der Konzern-Treasury ab. Sicherungstraktionen mit externen Handelspartnern des globalen Finanzmarkts werden vorbehaltlich der genannten Einschränkung durch die Konzern-Treasury abgeschlossen. Dies schließt den Abschluss von Geschäften, die die Voraussetzungen für die Bilanzierung einer Sicherungsbeziehung erfüllen, mit ein.

Siemens verfolgt einen konzernweiten Portfolioansatz, wodurch ein Nutzen aus der möglichen Aufrechnung gegenläufiger Zahlungsmittelflüsse in der gleichen Währung erzielt sowie eine Minimierung der Transaktionskosten erreicht werden. Informationen zu den Auswirkungen des konzernweiten Portfolioansatzes auf den Konzernabschluss sowie zu den derivativen Finanzinstrumenten, für die die Bilanzierung einer Sicherungsbeziehung angewandt wird, um Fremdwährungsrisiken zu reduzieren oder auszuschalten, finden sich unter »Ziffer 32«.

Den VaR der Fremdwährungspositionen berechnet Siemens auf Grundlage der Aggregation der Nettowährungspositionen unter Berücksichtigung der Sicherungsgeschäfte. Zum 30. September 2010 wurde das Fremdwährungsrisiko als VaR in Höhe von 18 EUR ermittelt, basierend auf historischen Volatilitäten

und Korrelationen, einer Haltedauer von zehn Tagen sowie einem Konfidenzniveau von 99,5%. Zum 30. September 2009 betrug der vergleichbare VaR der Fremdwährungspositionen 12 EUR. Volatile Wechselkurse können zu Bewertungsänderungen der Zahlungsmittelflüsse und damit der nicht gesicherten Umsätze sowie der nicht gesicherten Materialaufwendungen in Euro führen. Zusätzlich können künftige Wechselkursänderungen Auswirkungen auf die ungesicherten Preise für Güter und Dienstleistungen haben und zu Änderungen der Gewinnmargen führen. Der Umfang der Beeinflussung ist im Wesentlichen davon abhängig, in welcher Höhe den Fremdwährungsumsätzen Aufwendungen in der jeweiligen Fremdwährung gegenüberstehen.

Fremdwährungsrisiken resultieren – nach der Definition von Siemens – aus Bilanzpositionen und aus schwebenden Geschäften in Fremdwährungen sowie aus allen Mittelzuflüssen beziehungsweise -abflüssen in Fremdwährungen, die sich aus antizipierten Transaktionen der folgenden drei Monate ergeben. Dabei betrachtet Siemens das Fremdwährungsrisiko, das aus der Sicht der jeweiligen Siemens-Einheit und ihrer funktionalen Währung gegenüber allen Fremdwährungen besteht.

#### **Auswirkung von translationsbezogenen Währungsrisiken**

Viele Tochtergesellschaften von Siemens befinden sich außerhalb des Euro-Währungsraums. Da die Berichtswährung bei Siemens der Euro ist, rechnet das Unternehmen im Konzernabschluss die Abschlüsse dieser Gesellschaften in Euro um. Um translationsbezogene Fremdwährungseffekte im Risikomanagement zu adressieren, wird unterstellt, dass Investitionen in ausländische Gesellschaften grundsätzlich auf Dauer angelegt sind und die Ergebnisse kontinuierlich reinvestiert werden. Translationsbezogene Auswirkungen, die entstehen, wenn sich der Wert der Nettovermögenspositionen umgerechnet in Euro aufgrund von Wechselkursschwankungen ändert, werden im Eigenkapital des Konzernabschlusses von Siemens erfasst.

#### **Zinsrisiken**

Das Zinsrisiko von Siemens resultiert hauptsächlich aus Finanzschulden sowie Schuldverschreibungen, Darlehen, Programmen zur Begebung von kurzfristigen Schuldverschreibungen und zinstragenden Anlagen beziehungsweise verzinslichen Aufnahmen. Siemens strebt an, dieses Risiko durch den Einsatz derivativer Instrumente zu steuern, indem Festzinszahlungen in variable Zinszahlungen getauscht und dadurch gegen Marktwertänderungen gesichert werden.



Die Konzern-Treasury leitet das globale Konzern-Zinsrisiko mit dem Ziel, den Zinsertrag und den Zinsaufwand des Konzerns zu optimieren sowie das gesamte Zinsänderungsrisiko unter Berücksichtigung von aus Zinsänderungen resultierenden Bewertungsrisiken, die sich im Konzernergebnis niederschlagen, sowie der wirtschaftlichen Risiken ändernder Zinssätze zu steuern. Die Konzern-Treasury führt ein umfassendes konzernweites Zinssatzmanagement durch, das die Zinsrisiken aus dem SFS-Geschäft separat von den sonstigen Konzern-Zinsrisiken steuert. Weitere Informationen finden sich unter »Ziffer 32«.

Soweit länderspezifische Regelungen dem nicht entgegenstehen, stellt die Konzern-Treasury sämtlichen Segmenten und Einheiten den erforderlichen Finanzierungsbedarf in Form von Darlehen beziehungsweise über konzerninterne Verrechnungskonten zur Verfügung. Das gleiche Konzept wendet Siemens für Einlagen aus den von den Einheiten erwirtschafteten Zahlungsmitteln an.

Zum 30. September 2010 betrug der Zinsrisiko-VaR, basierend auf historischen Volatilitäten und Korrelationen, einer Haltedauer von zehn Tagen sowie einem Konfidenzniveau von 99,5 %, 107 EUR. Das vergleichbare Zinsrisiko zum 30. September 2009 betrug 33 EUR. Dieses Zinsrisiko resultiert in erster Linie aus der langfristigen auf Festzinsbasis aufgenommenen Finanzverschuldung in EUR und USD sowie aus zinstragenden Anlagen. Der Anstieg des VaR ist hauptsächlich durch eine Neuausrichtung des Zinsrisikomanagements, beginnend mit dem ersten Quartal des Geschäftsjahrs 2010, begründet. Im Vergleich zum bisherigen Zins-Overlay-Management führte der Orientierungswert-Ansatz zu längeren Zinsbindungen der Derivate sowie einem höheren Nominalvolumen. Weitere Informationen finden sich unter »Ziffer 32«.

### Rohstoffpreisrisiken

Die Produktionstätigkeit von Siemens setzt den Konzern diversen Rohstoffpreisrisiken im Rahmen der gewöhnlichen Geschäftstätigkeit aus. Insbesondere in den Sektoren Energy und Industry ist eine ununterbrochene Versorgung mit Kupfer für die laufende Geschäftstätigkeit notwendig. Fluktuationen der Rohstoffpreise können nicht beabsichtigte und unvorhersehbare Ergebnis- und Zahlungsmittelvolatilitäten auslösen. Der Konzern wendet daher – wie weiter unten beschrieben – eine Vielzahl von Strategien an, die diese Risiken begrenzen oder eliminieren sollen. Diese Strategien umfassen auch den Einsatz von derivativen Finanzinstrumenten.

Siemens hat ein Rohstoffpreisrisikomanagementsystem etabliert, um Volatilitäten von Ergebnissen und Zahlungsmittelflüssen zu reduzieren. Jede Einheit von Siemens ist für das Erfassen, Bewerten, Überwachen, Berichterstellen und Absichern von geplanten und schwebenden Rohstoffkäufen verantwortlich (Rohstoffpreisrisiko). Die verbindliche Richtlinie für die Divisionen und Einheiten von Siemens, die vom zentralen Supply Chain Management entwickelt wurde, stellt den konzeptionellen Unterbau für die Identifikation und Bewertung von Rohstoffpreisrisiken dar. Sie verpflichtet die Einheiten, diese Risiken im Rahmen eines engen Korridors zu sichern. Dieser Korridor entspricht 75–100% der Rohstoffpreisrisiken im Produktgeschäft für das aktuelle und darauffolgende Quartal sowie 95–100% der Rohstoffpreisrisiken im Projektgeschäft nach Eingang des Auftrags.

Das aggregierte Rohstoffpreisrisiko wird mit externen Handelspartnern durch den Einsatz von derivativen Finanzinstrumenten durch die Konzern-Treasury abgesichert. Finanzwirtschaftliche Sicherungsinstrumente, die zum Zweck der Bilanzierung einer Sicherungsbeziehung vereinbart werden, werden direkt mit externen Handelspartnern abgeschlossen. Zusätzlich wendet Siemens einen konzernweiten Portfolioansatz an, dessen Nutzen in der Optimierung der konzernweiten Gesamtrohstoffrisikoposition liegt. Weiterführende Informationen zu den Effekten dieses konzernweiten Portfolioansatzes, sowohl zum Konzernabschluss als auch zu angewendeten Absicherungsstrategien zur Begrenzung und Reduzierung des Rohstoffpreisrisikos, sind in »Ziffer 32« angegeben.

Basierend auf historischen Volatilitäten und Korrelationen, einer Haltedauer von zehn Tagen sowie einem Konfidenzniveau von 99,5% wurde der VaR der externen Rohstoffderivate von Siemens zum 30. September 2010 mit 47 EUR ermittelt. Zum 30. September 2009 lag der entsprechende VaR bei 68 EUR. Der wirtschaftliche VaR unter Einbeziehung der Grundgeschäfte betrug zum 30. September 2010 8 EUR.

### Aktienkursrisiken

Das Siemens-Anlageportfolio umfasst direkte und indirekte Aktienanlagen in börsennotierte Unternehmen, die die Gesellschaft nicht zu Handelszwecken hält. Diese Anteile resultieren hauptsächlich aus strategischen Partnerschaften oder aus Kompensationen für Transaktionen in Zusammenhang mit Fusionen und Übernahmen. Indirekte Aktienanlagen erfolgen in der Regel aus finanzwirtschaftlichen Gründen.



Siemens überwacht die Aktieninvestitionen anhand ihrer aktuellen Marktwerte, die hauptsächlich von den Schwankungen der volatilen technologiebezogenen Märkte weltweit beeinflusst werden. Der Marktwert des Siemens-Portfolios belief sich zum 30. September 2010 auf 138 EUR, im Vergleich zu einem Marktwert von 141 EUR zum 30. September 2009.

Basierend auf historischen Volatilitäten und Korrelationen, einer Haltedauer von zehn Tagen sowie einem Konfidenzniveau von 99,5% wurde der VaR der oben genannten Aktienpositionen von Siemens zum 30. September 2010 in Höhe von 13 EUR ermittelt. Zum 30. September 2009 lag der entsprechende VaR bei 21 EUR; dies entspricht einem Rückgang des Aktienkursrisikos im Laufe des vergangenen Geschäftsjahrs.

### Liquiditätsrisiken

Das Liquiditätsrisiko für die Gesellschaft besteht darin, dass sie möglicherweise ihren finanziellen Verpflichtungen nicht nachkommen kann, zum Beispiel der Tilgung von Finanzschulden oder der Bezahlung laufender Verbindlichkeiten aus der laufenden Geschäftstätigkeit. Siemens begrenzt dieses Risiko durch ein effektives Management des Nettoumlaufvermögens sowie der Zahlungsmittel, den Zugang zu Kreditlinien bei Kreditinstituten mit ausschließlich hervorragendem Rating, ein Programm zur Begebung mittelfristiger Schuldverschreibungen sowie ein etabliertes globales Programm zur Begebung kurzfristiger Schuldverschreibungen. Weitere Informationen zu kurzfristigen und langfristigen Finanzschulden finden sich unter »Ziffer 23«.

Ergänzend zu den oben genannten Instrumenten der Liquiditätssicherung verfolgt Siemens kontinuierlich die sich an den Finanzmärkten bietenden Finanzierungsmöglichkeiten. Außerdem beobachtet Siemens, wie sich Verfügbarkeit und Kosten entwickeln. Ein wesentliches Ziel dabei ist es, die finanzielle Flexibilität von Siemens zu sichern und unangemessene Refinanzierungsrisiken zu begrenzen.

Die folgende Tabelle zeigt alle zum 30. September 2010 vertraglich fixierten Zahlungen für Tilgungen, Rückzahlungen und Zinsen aus bilanzierten finanziellen Verbindlichkeiten, einschließlich erwarteter Nettozahlungen aufgrund von Verbindlichkeiten aus derivativen Finanzinstrumenten. Die erwarteten Nettozahlungen werden für jeden Zahlungszeitpunkt und jedes Finanzinstrument einzeln ermittelt. Die Tabelle gibt die nicht diskontierten Nettozahlungsabflüsse für die nächsten Geschäftsjahre an, wobei jeweils der frühestmögliche Zahlungszeitpunkt angenommen wird. Die Mittel-

abflüsse für finanzielle Verbindlichkeiten (einschließlich Zinsen) ohne festen Betrag oder Zeitraum basieren auf den Konditionen zum 30. September 2010.

|                                                  | Geschäftsjahr |       |             |                 |
|--------------------------------------------------|---------------|-------|-------------|-----------------|
|                                                  | 2011          | 2012  | 2013 – 2015 | 2016 und danach |
| Nicht derivative finanzielle Verbindlichkeiten   |               |       |             |                 |
| Anleihen und Schuldverschreibungen               | 2.778         | 3.166 | 4.588       | 9.874           |
| Verbindlichkeiten gegenüber Kreditinstituten     | 328           | 46    | 2.026       | 13              |
| Übrige Finanzschulden                            | 27            | 21    | 63          | 38              |
| Verbindlichkeiten aus Finanzierungsleasing       | 57            | 21    | 41          | 73              |
| Verbindlichkeiten aus Lieferungen und Leistungen | 7.880         | 12    | 5           | 2               |
| Sonstige finanzielle Verbindlichkeiten           | 499           | 59    | 85          | 9               |
| Derivative finanzielle Verbindlichkeiten         | 535           | 296   | 222         | 56              |

Das Risiko der Zahlungsströme aus der Tabelle ist auf die Zahlungsabflüsse beschränkt. Die Verbindlichkeiten aus Finanzierungsleasing, aus Lieferungen und Leistungen sowie die sonstigen finanziellen Verbindlichkeiten stammen hauptsächlich aus der Finanzierung von in den fortgeführten Aktivitäten genutzten operativen Vermögenswerten, wie Sachanlagen, und aus Investitionen innerhalb des Nettoumlaufvermögens (zum Beispiel Vorräte und Forderungen aus Lieferungen und Leistungen). Siemens berücksichtigt diese Vermögenswerte bei der effektiven Steuerung des gesamten Liquiditätsrisikos. Um die vorhandenen finanziellen Vermögenswerte und Verbindlichkeiten zu überwachen und die zukünftigen Risiken effektiv zu steuern, etablierte Siemens ein umfangreiches Risikoberichterstattungssystem, das die weltweiten Geschäftseinheiten umfasst.

Die Gesamtsicht auf Liquidität und Finanzschulden ergibt sich aus der Berechnung der **Nettoverschuldung**. Die Nettoverschuldung resultiert aus der **Summe Finanzschulden** abzüglich der **Summe Liquidität**. Die **Summe Finanzschulden** besteht aus den Positionen **Kurzfristige Finanzschulden** und **kurzfristig fällige Anteile langfristiger Finanzschulden** sowie **Langfristige Finanzschulden**, wie sie in der Konzernbilanz

ausgewiesen sind. Die Summe Finanzschulden setzt sich zusammen aus *Anleihen und Schuldverschreibungen, Verbindlichkeiten gegenüber Kreditinstituten, Verbindlichkeiten aus Finanzierungsleasing sowie Sonstigen Finanzschulden* wie zum Beispiel kurzfristige Schuldverschreibungen. Die *Summe Liquidität* bezieht sich auf die liquiden finanziellen Vermögenswerte, die uns am jeweiligen Bilanzstichtag zur Finanzierung unserer operativen Geschäftstätigkeit sowie zur Zahlung kurzfristig fälliger Verpflichtungen zur Verfügung standen. Sie besteht aus *Zahlungsmitteln und Zahlungsmitteläquivalenten* sowie aus kurzfristigen *Zur Veräußerung verfügbaren finanziellen Vermögenswerten*, wie sie in der Konzernbilanz ausgewiesen werden. Unser Management verwendet die Größe *Nettoverschuldung* für das interne Finanzmanagement sowie für die externe Kommunikation mit Investoren, Analysten und Ratingagenturen.

|                                                                                          | 30. September |               |
|------------------------------------------------------------------------------------------|---------------|---------------|
|                                                                                          | 2010          | 2009          |
| Kurzfristige Finanzschulden und kurzfristig fällige Anteile langfristiger Finanzschulden | 2.416         | 698           |
| Langfristige Finanzschulden                                                              | 17.497        | 18.940        |
| <b>Summe Finanzschulden</b>                                                              | <b>19.913</b> | <b>19.638</b> |
| Zahlungsmittel und Zahlungsmitteläquivalente                                             | 14.108        | 10.159        |
| Kurzfristige zur Veräußerung verfügbare finanzielle Vermögenswerte                       | 246           | 170           |
| <b>Summe Liquidität</b>                                                                  | <b>14.354</b> | <b>10.329</b> |
| <b>Nettoverschuldung (Summe Finanzschulden abzüglich Summe Liquidität)</b>               | <b>5.560</b>  | <b>9.309</b>  |

Unsere **Finanzausstattung** umfasst verschiedene kurz- und langfristige Finanzinstrumente. Dazu gehören unter anderem Kredite von Finanzinstituten, kurz- und mittelfristige Schuldverschreibungen und Anleihen. Zusätzliche Liquiditätsquellen sind Zahlungsmittel und Zahlungsmitteläquivalente, zukünftige Mittelzuflüsse aus laufender Geschäftstätigkeit und kurzfristig *Zur Veräußerung verfügbare, finanzielle Vermögenswerte*.

Unsere **Kapitalerfordernisse** umfassen unter anderem die planmäßige Bedienung unserer Finanzschulden, die regelmäßigen Investitionen, die laufenden Kapitalerfordernisse der operativen Geschäftstätigkeit, der Konzern-Treasury-Aktivitäten und des SFS-Finanzierungsgeschäfts, Dividendenzahlungen, die Finanzierung der Pensionspläne sowie Mittelabflüsse in Zusammenhang mit Portfolioaktivitäten und mit Restrukturierungsmaßnahmen.

## Kreditrisiken

Die Gesellschaft ist insbesondere aufgrund ihres umfassenden Projektgeschäfts der Sektoren sowie einiger Sektorübergreifender Geschäftsfelder Kreditrisiken ausgesetzt, hauptsächlich in der öffentlichen Infrastruktur und im Transport, in der Energieerzeugung, -übertragung und -verteilung, im Gesundheitswesen, in Versorgungsunternehmen sowie in der IT, da Siemens verschiedenen Kunden unterschiedliche direkte oder indirekte Finanzierungsformen anbietet. In einer begrenzten Anzahl von Fällen kann die Gesellschaft auch Eigenkapitalanteile im Rahmen der Projektfinanzierung übernehmen.

Darüber hinaus können aus Finanzierungsaktivitäten, überwiegend in Zusammenhang mit Medizingeräten sowie fremdbezogenen Datenverarbeitungsgeräten und Industriegütern, Kreditrisiken entstehen.

Ein Kreditrisiko ist der unerwartete Verlust an Zahlungsmitteln oder Erträgen. Dieser tritt ein, wenn der Kunde nicht in der Lage ist, seinen Verpflichtungen bei Fälligkeit nachzukommen, wenn die als Sicherheit dienenden Vermögenswerte an Wert verlieren oder wenn die Projekte, in die Siemens investiert hat, nicht erfolgreich sind. Als eine Konsequenz der weltweiten Finanzmarktkrise kann es zu ansteigenden Ausfallwahrscheinlichkeiten und einem Wertverlust von Sicherheiten kommen. Die effektive Überwachung und Steuerung der Kreditrisiken ist eine Kernkompetenz unseres Risikomanagementsystems. Siemens hat für alle Einheiten gültige Kreditrisikogrundsätze implementiert. Aus diesem Grund führt Siemens für alle Kunden mit einem Kreditbedarf, der über bestimmte, zentral festgelegte Grenzen hinausgeht, Kreditprüfungen und Ratings durch.

Die Kundenratings, die eine beauftragte SFS-Abteilung erstellt und überprüft, sowie die Festlegung individueller Kundenlimite basieren auf allgemein anerkannten Ratingmethoden, auf Angaben externer Kreditratingagenturen sowie auf den bisherigen Kundenausfallerfahrungen von Siemens. Die Ratings werden von internen Spezialisten für Risikobewertungen durchgeführt. Siemens berücksichtigt diese Ratings und Limite sorgfältig bei der Ermittlung der Konditionen für direkte oder indirekte Kundenfinanzierungen.

Die Gesellschaft erfasst und überwacht das Kreditrisiko fortlaufend. Dabei wendet sie je nach zugrunde liegendem Produkt verschiedene Konzepte an. Zentrale Systeme werden für die fortlaufende Überwachung des Ausfallrisikos verwendet. Zusätzlich setzt die SFS eigene Systeme für ihre Finanzie-

rungsaktivitäten ein. Ergänzend existieren viele dezentrale Anwendungen, die dabei helfen, mit dem individuellen Kreditrisiko innerhalb der operativen Einheiten umzugehen. Eine zentrale IT-Anwendung verarbeitet die Daten der operativen Einheiten zusammen mit den Rating- und Ausfallinformationen. Daraus ergibt sich eine Schätzung, die als Basis für die Ermittlung der Einzelwertberichtigung für Ausfallrisiken genutzt werden kann. Über diesen automatisierten Prozess hinaus werden auch qualitative Informationen herangezogen, insbesondere um aktuelle Entwicklungen zu berücksichtigen.

Um die Transparenz des Kreditrisikos zu erhöhen, hat die Konzern-Treasury im Geschäftsjahr 2008 das »Siemens Credit Warehouse« eingeführt. Bestimmte operative Einheiten des Siemens-Konzerns übertrugen ihre Geschäftspartnerdaten als Grundlage für einen zentralisierten Ratingprozess an das Siemens Credit Warehouse. Zusätzlich übertrugen bestimmte operative Einheiten aus Europa und Nordamerika im Geschäftsjahr 2010 ihre kurzfristigen Forderungen aus Lieferungen und Leistungen inklusive des Kreditrisikos an das Siemens Credit Warehouse. Die operativen Einheiten bleiben jedoch weiterhin für Serviceaktivitäten wie Mahnwesen und Verwaltung der Forderungen verantwortlich. Das Siemens Credit Warehouse identifiziert, quantifiziert und verwaltet aktiv das Kreditrisiko des Portfolios, indem es Risiken von spezifischen Kunden, Ländern und Branchen verkauft oder absichert. Das Siemens Credit Warehouse schafft nicht nur eine verbesserte Transparenz über die Kreditrisiken, sondern kann für Siemens auch eine zusätzliche Finanzierungsquelle darstellen und somit die Finanzierungsflexibilität von Siemens stärken.

Der Buchwert wird als maximaler Risikobetrag für finanzielle Vermögenswerte ohne Anrechnung von Sicherheiten angesetzt. Kreditrisiken, die aus Kreditgarantien/-bürgschaften resultieren, erläutert Siemens unter »Ziffer 29«. Es lagen zum 30. September 2010 und zum 30. September 2009 konzernweit keine wesentlichen Konzentrationen von Kreditrisiken vor.

Bei den Forderungen aus Lieferungen und Leistungen und den sonstigen Forderungen sowie den sonstigen Darlehen und Forderungen innerhalb der Position *Sonstige finanzielle Vermögenswerte*, die weder wertberichtigt noch überfällig sind, lagen zum 30. September 2010 keine Anhaltspunkte vor, dass Zahlungsausfälle eintreten werden. Zum 30. September 2010 und zum 30. September 2009 hielt Siemens keine überfälligen Finanzinstrumente, die nicht wertberichtigt wurden. Weitere Informationen zum Konzept, wie Wertberichtigungen von Forderungen zu bestimmen sind, finden sich unter »Ziffer 3«.

## 34 – Aktienbasierte Vergütung

Aktienbasierte Zusagen, inklusive Aktienzusagen, Aktienoptionen, des Share-Matching-Programms und seiner zugrunde liegenden Pläne, des Monatlichen Investitionsplans sowie des Jubiläumsaktienprogramms, sind bei Siemens vorwiegend mit Ausgleich durch Eigenkapitalinstrumente und in gewissem Umfang auch als Pläne mit Barausgleich ausgestaltet. Die im Gewinn (nach Steuern) enthaltenen Vorsteueraufwendungen für aktienbasierte Vergütung der Geschäftsjahre 2010 und 2009 betragen 132 EUR beziehungsweise 212 EUR. Diese beziehen sich im Wesentlichen auf Zusagen, die Siemens durch Eigenkapitalinstrumente ausgleicht, einschließlich des Mitarbeiteraktienprogramms.

### I. Instrumente mit Eigenkapitalabgeltung

#### Aktienzusagen (Stock Awards)

Das Unternehmen gewährt Mitgliedern des Vorstands und anderen teilnahmeberechtigten Mitarbeitern Aktienzusagen (Stock Awards) und virtuelle Aktien (Phantom Stocks) als eine weitere Form der aktienorientierten Vergütung. Die Aktienzusagen, die bis zum Geschäftsjahr 2007 gewährt wurden, unterliegen einem Erdienungszeitraum (Vesting Period, Halteperiode) von vier Jahren. Für nach diesem Zeitpunkt gewährte Aktienzusagen beträgt der Erdienungszeitraum drei Jahre. Nach Ablauf des Erdienungszeitraums erhält der Empfänger Siemens-Aktien, ohne hierfür eine Zahlung zu leisten. Die Aktienzusagen verfallen, wenn das Beschäftigungsverhältnis desjenigen, der die Aktienzusagen erhalten hat, vor Ablauf des Erdienungszeitraums beendet wird. Die Aktienzusagen sind während des Erdienungszeitraums nicht dividendenberechtigt. Sie dürfen weder übertragen noch verkauft, verpfändet oder anderweitig beliehen werden. Siemens kann die Aktienzusagen durch neu ausgegebene Aktien der Siemens AG, durch eigene Aktien oder durch Geldzahlung abgelten. Die Art der Abgeltung legen Vorstand und Aufsichtsrat fest.

Die Gesellschaft entscheidet in jedem Geschäftsjahr neu, ob sie Siemens-Aktienzusagen einräumt. Diese kann sie nur einmal jährlich innerhalb der 30 Tage bewilligen, die auf die Veröffentlichung der Geschäftszahlen für das vorangegangene Geschäftsjahr folgen. Dabei entscheidet der Aufsichtsrat jährlich nach Ende des Geschäftsjahrs über die Anzahl der Aktienzusagen, die er dem Vorstand einräumt; der Vorstand wiederum beschließt jährlich, wie viele Aktienzusagen er den Führungskräften der in- und ausländischen Tochterunternehmen und anderen teilnahmeberechtigten Mitarbeitern gewährt.

Im Geschäftsjahr 2010 gewährte die Gesellschaft 1.361.586 Aktienzusagen: 1.207.360 Aktienzusagen wurden 4.305 Mitarbeitern und 154.226 Aktienzusagen wurden Mitgliedern des Vorstands gewährt. Im Geschäftsjahr 2009 gewährte die Gesellschaft 1.992.392 Aktienzusagen: 1.740.063 Aktienzusagen wurden 4.156 Mitarbeitern gewährt. 252.329 Aktienzusagen wurden Mitgliedern des Vorstands gewährt. Die nachfolgende Tabelle zeigt die Entwicklung der Aktienzusagen mit den entsprechenden gewichteten durchschnittlichen beizulegenden Zeitwerten je zugesagter Aktie zum Zeitpunkt ihrer Gewährung:

|                                                              | Geschäftsjahr 2010     |                                                                               | Geschäftsjahr 2009 |                                                                               |
|--------------------------------------------------------------|------------------------|-------------------------------------------------------------------------------|--------------------|-------------------------------------------------------------------------------|
|                                                              | Zusagen                | Gewichteter durchschnittlicher beizulegender Zeitwert zum Gewährungszeitpunkt | Zusagen            | Gewichteter durchschnittlicher beizulegender Zeitwert zum Gewährungszeitpunkt |
| Bestand zu Beginn des Berichtszeitraums (nicht erdient)      | 4.438.303              | 57,22 EUR                                                                     | 3.489.768          | 67,56 EUR                                                                     |
| gewährt                                                      | 1.361.586              | 60,79 EUR                                                                     | 1.992.392          | 37,65 EUR                                                                     |
| erdient                                                      | - 824.694              | 57,28 EUR                                                                     | - 881.097          | 55,63 EUR                                                                     |
| verfallen / abgegolten                                       | - 187.877 <sup>1</sup> | 61,50 EUR <sup>1</sup>                                                        | - 162.760          | 48,01 EUR                                                                     |
| <b>Bestand am Ende des Berichtszeitraums (nicht erdient)</b> | <b>4.787.318</b>       | <b>58,06 EUR</b>                                                              | <b>4.438.303</b>   | <b>57,22 EUR</b>                                                              |

<sup>1</sup> Setzt sich zusammen aus 153.020 verfallenen und 34.857 abgegoltenen Aktienzusagen mit einem gewichteten durchschnittlichen beizulegenden Zeitwert zum Gewährungszeitpunkt von 57,43 EUR beziehungsweise 79,34 EUR im Geschäftsjahr 2010 und 2009.

Der beizulegende Zeitwert der gewährten Aktienzusage wurde als Differenz zwischen dem Marktpreis der Siemens-Aktie und dem Barwert der innerhalb des vier- beziehungsweise dreijährigen Erdienungszeitraums erwarteten Dividenden ermittelt, da Aktienzusagen während des Erdienungszeitraums keine Dividendenberechtigung beinhalten. Als beizulegender Zeitwert ergab sich dabei im Geschäftsjahr 2010 und 2009 je zugesagter Aktie ein Wert von 60,79 EUR beziehungsweise 37,65 EUR. Der beizulegende Zeitwert aller im Geschäftsjahr 2010 und 2009 gewährten Aktienzusagen belief sich auf 83 EUR beziehungsweise 75 EUR.

Die im Geschäftsjahr 2010 verfallenen/abgegoltenen Aktienzusagen beinhalten Aktienzusagen, die ehemaligen Vorstands- und Aufsichtsratsmitgliedern gewährt wurden. Diese nutzten ihre Ansprüche aus Aktienzusagen zur Aufrechnung ihrer Verpflichtungen gegenüber der Gesellschaft, die aus Vergleichsvereinbarungen in Zusammenhang mit Compliance-Sachverhalten entstanden waren. Für weitere Informationen hierzu siehe »Ziffer 30«.

### Share-Matching-Programm und die zugrunde liegenden Pläne:

#### a) Basis-Aktien-Programm

Im Rahmen des Basis-Aktien-Programms können Mitglieder des Vorstands und Mitarbeiter der Siemens AG sowie der teilnehmenden Konzerngesellschaften einmal jährlich Aktien des Unternehmens zu günstigen Bedingungen erwerben. Das Basis-Aktien-Programm wird mit dem beizulegenden Zeitwert zum Zeitpunkt der Gewährung bewertet. Die unter dem Basis-Aktien-Programm erworbenen Aktien gewähren einen Anspruch auf Gratisaktien (Matching-Aktien) zu den gleichen Bedingungen wie beim nachfolgend beschriebenen Share Matching Plan.

Im Geschäftsjahr 2010 ermöglicht das Basis-Aktien-Programm Mitgliedern des Vorstands und Mitarbeitern der Siemens AG sowie den teilnehmenden Konzerngesellschaften, einen bestimmten Betrag ihres Gehalts in Siemens-Aktien zu investieren, der dann von Siemens mit einem steuerbegünstigten Unternehmenszuschuss je Planteilnehmer aufgestockt wird. Die Aktien wurden zum Marktpreis an einem festgelegten Tag im zweiten Quartal erworben. Im Geschäftsjahr 2010 entstanden für die Gesellschaft aktienbasierte Vergütungsaufwendungen vor Steuern in Höhe von 27 EUR. Im Geschäftsjahr 2009 konnten Mitglieder des Vorstands und Mitarbeiter der Siemens AG sowie der teilnehmenden Konzerngesellschaften eine bestimmte Anzahl Siemens-Aktien zu einem Vorzugspreis erwerben. Bis zu einem festgelegten Datum im ersten Quartal des Geschäftsjahrs konnten Mitarbeiter die Aktien bestellen, die Siemens dann im zweiten Quartal des Geschäftsjahrs ausgab. Auf der Basis eines Vorzugspreises in Höhe von 22 EUR pro Aktie und eines beizulegenden Zeitwerts zum Zeitpunkt der Gewährung in Höhe von 25,56 EUR je Aktie ergaben sich für die Gesellschaft im Geschäftsjahr 2009 aktienbasierte Vergütungsaufwendungen vor Steuern in Höhe von 42 EUR.

Der beizulegende Zeitwert ergibt sich dabei aus dem Marktpreis der Siemens-Aktie, abzüglich des Barwerts der erwarteten Dividenden, da Investment-Aktien bis zur Ausgabe im

zweiten Quartal kein Recht auf Zahlung einer Dividende enthalten, sowie abzüglich des vom teilnehmenden Mitarbeiter bezahlten Kaufpreises der Aktie.

Im Geschäftsjahr 2009 wurde das bisherige Mitarbeiteraktienprogramm durch das Basis-Aktien-Programm abgelöst.

#### **b) Share Matching Plan**

Im ersten Quartal des Geschäftsjahrs 2010 führte Siemens einen neuen Share Matching Plan ein (Share Matching Plan 2010). Im Gegensatz zum Share Matching Plan 2009 (siehe unten) dürfen am Share Matching Plan 2010 nur Leitende Angestellte (»Senior Manager«) teilnehmen. Leitende Angestellte der Siemens AG und der teilnehmenden Konzerngesellschaften können einen bestimmten Betrag ihrer Vergütung in Siemens-Aktien investieren. Während für den Share Matching Plan 2009 der Kaufpreis der Investment-Aktien am Entscheidungstag festgelegt wurde, werden die Aktien aus dem Share Matching Plan 2010 zum Marktpreis an einem vorher festgelegten Kauftag im zweiten Quartal erworben. Bis zu den festgesetzten Zeitpunkten der Gewährung im ersten Quartal eines jeden Geschäftsjahrs müssen Leitende Angestellte entscheiden, welchen Betrag sie in den Erwerb von Investment-Aktien investieren möchten. Die Investment-Aktien gibt Siemens dann im zweiten Quartal des Geschäftsjahrs aus. Hierfür erhalten Planteilnehmer die Berechtigung auf eine Gratisaktie (Matching-Aktie) für je drei über den Erdienungszeitraum von drei Jahren gehaltene Investment-Aktien, vorausgesetzt, der Planteilnehmer ist bis zum Ende des Erdienungszeitraums ununterbrochen bei der Siemens AG oder einer anderen Konzerngesellschaft beschäftigt. Die Gratisaktien sind während des Erdienungszeitraums der Investment-Aktien nicht dividendenberechtigt. Der Anspruch auf Gratisaktien entfällt, wenn die Investment-Aktien übertragen, verkauft, verpfändet oder anderweitig beliehen werden. Der Vorstand und der Aufsichtsrat werden in jedem Geschäftsjahr entscheiden, ob ein neuer Share Matching Plan aufgelegt wird. Der beizulegende Zeitwert der Investment-Aktien aus dem Share Matching Plan 2010 zum Zeitpunkt der Gewährung beträgt – EUR, da die Investment-Aktien zum Marktpreis erworben werden.

Im ersten Quartal des Geschäftsjahrs 2009 führte das Unternehmen den Share Matching Plan 2009 für Mitglieder des Vorstands sowie für Mitarbeiter, die bei der Siemens AG und den teilnehmenden Konzerngesellschaften beschäftigt sind, ein. Der Share Matching Plan ermöglicht den Planteilnehmern, einen bestimmten prozentualen Anteil ihrer Vergütung in

Siemens-Aktien zu einem am Tag der Beschlussfassung festgesetzten Kurs zu investieren (Investment-Aktien). Hierfür erhalten Planteilnehmer die Berechtigung auf eine Gratisaktie (Matching-Aktie) für je drei über den Erdienungszeitraum von drei Jahren gehaltene Investment-Aktien, vorausgesetzt, der Planteilnehmer ist bis zum Ende des Erdienungszeitraums ununterbrochen bei der Siemens AG oder einer anderen Konzerngesellschaft beschäftigt. Bis zu den festgesetzten Zeitpunkten der Gewährung im ersten Quartal des Geschäftsjahrs 2009 konnten Mitarbeiter Investment-Aktien bestellen, die Siemens dann im zweiten Quartal des Geschäftsjahrs ausgab. Die Gratisaktien sind während des Erdienungszeitraums der Investment-Aktien nicht dividendenberechtigt. Der Anspruch auf Gratisaktien entfällt, wenn die Investment-Aktien übertragen, verkauft, verpfändet oder anderweitig beliehen werden. Unter dem Share Matching Plan 2009 ausgegebene Investment-Aktien werden mit dem beizulegenden Zeitwert zum Zeitpunkt der Gewährung bewertet. Dieser ergibt sich aus dem Marktpreis der Siemens-Aktie, abzüglich des Barwerts der erwarteten Dividenden, da Investment-Aktien bis zur Ausgabe im zweiten Quartal kein Recht auf Zahlung einer Dividende enthalten, und abzüglich des vom teilnehmenden Mitarbeiter bezahlten Kaufpreises der Aktie. In Abhängigkeit vom Gewährungsdatum – entweder 30. November 2008 oder 17. Dezember 2008 – betragen die beizulegenden Zeitwerte 3,47 EUR beziehungsweise 5,56 EUR je Aktie. Daraus ergab sich ein auf Basis der gewährten Aktien gewichteter durchschnittlicher beizulegender Zeitwert zum Zeitpunkt der Gewährung von 5,39 EUR je Aktie.

#### **c) Monatlicher Investitionsplan**

Im ersten Quartal des Geschäftsjahrs 2010 führte Siemens als weitere Komponente des Share Matching Plans den Monatlichen Investitionsplan ein. Der Monatliche Investitionsplan steht allen Mitarbeitern der Siemens AG und der teilnehmenden Konzerngesellschaften, die nicht Leitende Angestellte (»Senior Manager«) sind, zur Verfügung. Planteilnehmer können einen bestimmten Anteil ihrer Vergütung monatlich in Siemens-Aktien investieren. Der Vorstand wird jährlich entscheiden, ob die Aktien, die im Rahmen des Monatlichen Investitionsplans (Investment-Aktien) erworben wurden, in den Share Matching Plan im folgenden Jahr übertragen werden dürfen. Falls der Vorstand die Entscheidung trifft, dass Aktien, die im Rahmen des Monatlichen Investitionsplans erworben wurden, in den Share Matching Plan übertragen werden dürfen, erhält der Planteilnehmer die Berechtigung auf eine Gratisaktie (Matching-Aktie) für je drei über den Erdienungszeitraum von drei Jahren gehaltene Investment-Aktien, vorausge-

setzt, der Planteilnehmer ist bis zum Ende der Haltefrist ununterbrochen bei der Siemens AG oder einer anderen Konzerngesellschaft beschäftigt. Bis zu den festgesetzten Zeitpunkten der Gewährung im ersten Quartal eines jeden Geschäftsjahrs können Mitarbeiter entscheiden, ob sie am Monatlichen Investitionsplan und – somit daraus folgend – auch am Share Matching Plan teilnehmen möchten. Der Vorstand wird in jedem Geschäftsjahr entscheiden, ob ein neuer Monatlicher Investitionsplan aufgelegt wird.

#### d) Resultierende Matching-Aktien

|                                                  | Geschäftsjahr<br>2010<br>Matching-Aktien | Geschäftsjahr<br>2009<br>Matching-Aktien |
|--------------------------------------------------|------------------------------------------|------------------------------------------|
| Bestand zu Beginn<br>des Berichtszeitraums       | 1.266.444                                | –                                        |
| gewährt <sup>1</sup>                             | 446.324                                  | 1.324.596                                |
| verfallen                                        | – 59.414                                 | – 40.637                                 |
| abgegolten                                       | – 38.625                                 | – 17.515                                 |
| <b>Bestand am Ende<br/>des Berichtszeitraums</b> | <b>1.614.729</b>                         | <b>1.266.444</b>                         |

<sup>1</sup> Im Geschäftsjahr 2010 und 2009 wurden davon 6.837 (im Vj. 25.962) an den Vorstand gewährt.

Der beizulegende Zeitwert ergibt sich aus dem Marktpreis der Siemens-Aktie, abzüglich des Barwerts der erwarteten Dividenden während des Erdienungszeitraums, da Matching-Aktien in diesem Zeitraum kein Recht auf Zahlung einer Dividende enthalten. Die Nichtausübungsbedingungen, das heißt, die während des Erdienungszeitraums geltenden Bedingungen, die zugrunde liegenden Aktien weder zu übertragen, zu verkaufen oder zu verpfänden noch anderweitig zu beleihen, wurden bei der Ermittlung der beizulegenden Zeitwerte berücksichtigt. Der beizulegende Zeitwert der am 17. Dezember 2009 gewährten Matching-Aktien beläuft sich auf 47,18 EUR je Aktie. Abhängig vom Zeitpunkt der Gewährung – entweder 30. November 2008 oder 17. Dezember 2008 – betragen die beizulegenden Zeitwerte 20,32 EUR beziehungsweise 21,34 EUR je Aktie. Im Geschäftsjahr 2010 und 2009 betrug der auf Basis der gewährten Aktien gewichtete durchschnittliche beizulegende Zeitwert der daraus abgeleiteten Matching-Aktien zum Zeitpunkt der Gewährung 47,18 EUR beziehungsweise 21,29 EUR je Aktie. Der gesamte beizulegende Zeitwert der gewährten Matching-Aktien für die Geschäftsjahre 2010 und 2009 betrug 21 EUR beziehungsweise 28 EUR.

#### Jubiläumsaktien

Im Geschäftsjahr 2009 änderte Siemens die Jubiläumsregelungen für mehrere Konzerngesellschaften von einer reinen Barzahlung in eine aktienbasierte Vergütung. Im Rahmen des Jubiläumsaktienprogramms gewährt Siemens nach fortlaufender Beschäftigung teilnahmeberechtigten Mitarbeitern bei Erreichen eines 25- und 40-jährigen Dienstjubiläums (Erdienungszeitraum) jeweils Jubiläumsaktien. Die Erfüllung der Jubiläumszusagen erfolgt in Aktien. Jubiläumsaktien werden zum beizulegenden Zeitwert unter Berücksichtigung biometrischer Faktoren bewertet. Der beizulegende Zeitwert der Jubiläumsaktien ergibt sich aus dem Marktpreis der Siemens-Aktie am Zuteilungstag, abzüglich des Barwerts der innerhalb des Erdienungszeitraums erwarteten Dividenden, auf die Mitarbeiter keinen Anspruch haben. Der gewichtete durchschnittliche beizulegende Zeitwert der im Geschäftsjahr 2010 gewährten Jubiläumsaktien für das 25-jährige beziehungsweise 40-jährige Dienstjubiläum beträgt 43,41 EUR beziehungsweise 39,54 EUR, basierend auf der Anzahl der gewährten Aktien. Der gewichtete durchschnittliche beizulegende Zeitwert der im Geschäftsjahr 2010 gewährten Jubiläumsaktien, angepasst um biometrische Faktoren (unter Berücksichtigung der Fluktuation), beträgt 29,40 EUR beziehungsweise 26,28 EUR. Der gewichtete durchschnittliche beizulegende Zeitwert der im Geschäftsjahr 2009 gewährten Jubiläumsaktien für das 25-jährige beziehungsweise 40-jährige Dienstjubiläum betrug 34,46 EUR beziehungsweise 29,01 EUR, basierend auf der Anzahl der gewährten Aktien. Der gewichtete durchschnittliche beizulegende Zeitwert der gewährten Jubiläumsaktien, angepasst um biometrische Faktoren (unter Berücksichtigung der Fluktuation), betrug im Geschäftsjahr 2009 25,18 EUR beziehungsweise 20,56 EUR.

Im Geschäftsjahr 2010 und 2009 wurden Ansprüche auf 0,45 Mio. beziehungsweise 4,87 Mio. Jubiläumsaktien gewährt, 0,06 Mio. beziehungsweise keine wurden übertragen und 0,18 Mio. beziehungsweise 0,08 Mio. Ansprüche verfielen, sodass sich ein Endstand an Ansprüchen auf Jubiläumsaktien von 5,0 Mio. beziehungsweise 4,8 Mio. zum 30. September 2010 und 2009 ergibt. Zum Geschäftsjahresende 2010 und 2009 wird erwartet, dass davon unter Berücksichtigung biometrischer Faktoren 3,69 Mio. beziehungsweise 3,52 Mio. Jubiläumsaktien erdient werden.



## Aktienoptionsplan

### Siemens Aktienoptionsplan 2001

Auf der Hauptversammlung vom 22. Februar 2001 verabschiedeten die Aktionäre den Siemens Aktienoptionsplan 2001. Dieser neue Plan ermöglicht es, bis zu 55 Mio. Bezugsrechte auszugeben. Nach Ablauf eines zweijährigen Erdienungszeitraums können die Beteiligten ihre Bezugsrechte innerhalb eines Zeitraums von drei Jahren ausüben. Der Ausübungspreis beträgt 120 % des Basispreises. Der Basispreis entspricht dem durchschnittlichen Eröffnungskurs der Siemens-Aktie an den fünf Handelstagen, die der Gewährung der Bezugsrechte vorausgehen. Voraussetzung für das Ausüben der Bezugsrechte ist, dass der Kurs der Siemens-Aktie mindestens einmal während der Laufzeit das Erfolgsziel, das dem Ausübungspreis entspricht, erreicht. Die Bestimmungen des Optionsplans erlauben es der Gesellschaft, nach ihrem Ermessen zu entscheiden, wie sie das Bezugsrecht erfüllen möchte: Sie kann den Bezugsberechtigten neue Aktien aus dem dafür geschaffenen Bedingten Kapital ausgeben, eigene Aktien verwenden oder einen Barausgleich vornehmen. Die Entscheidung, welche Alternative Siemens den Bezugsberechtigten im Einzelfall anbietet, trifft der Vorstand im Einvernehmen mit dem Aufsichtsrat. Der Barausgleich soll dem Unterschiedsbetrag zwischen dem Ausübungspreis und dem Eröffnungskurs der Siemens-Aktie am Tag der Ausübung der Bezugsrechte entsprechen.

Die Ausgabe von Aktienoptionen an die Mitglieder des Vorstands am 1. Oktober 2003 oder später stand unter dem Vorbehalt, dass der Aufsichtsrat bei außerordentlichen, nicht vor-

hergesehenen Entwicklungen des Siemens-Aktienkurses beschließen kann, die Optionsausübung zu begrenzen. Dabei kann er festlegen, dass die Anzahl der von jedem Vorstandsmitglied ausübaren Bezugsrechte limitiert wird, dass Bezugsrechte nur zum Barausgleich in einer festzulegenden eingeschränkten Höhe berechtigen oder dass die Ausübung der Bezugsrechte bis zum Ende der kursbeeinflussenden Entwicklung ausgesetzt ist. Der beizulegende Zeitwert der Optionen ist nicht um die aus den Einschränkungen resultierenden Effekte angepasst. Solange es nicht wahrscheinlich ist, dass solche außerordentlichen Ereignisse eintreten, kann Siemens keine adäquaten Schätzungen vornehmen. Da es demnach nicht möglich ist, den beizulegenden Zeitwert dieser Optionen zum Zeitpunkt ihrer Gewährung verlässlich zu schätzen, ermittelt Siemens die Vergütungskosten so lange vom inneren Wert der Optionen ausgehend, bis die Anzahl der Aktien, die der Vorstand beziehen darf, und der Ausübungspreis feststehen. Sobald dies der Fall ist, bestimmt Siemens den beizulegenden Zeitwert in Übereinstimmung mit den Fair-Value-Vorschriften des IFRS 2, *Share-Based Payment*, mithilfe eines geeigneten Verfahrens der Optionspreisbewertung.

Die Genehmigung für eine Ausgabe von Optionen im Rahmen des Aktienoptionsplans 2001 lief am 13. Dezember 2006 aus. Dementsprechend gewährte Siemens unter diesem Plan keine weiteren Optionen mehr.

Nachstehende Tabelle stellt die Entwicklung der Aktienoptionen und deren gewichtete durchschnittliche Ausübungspreise in den Geschäftsjahren 2010 und 2009 dar:

|                                              | Geschäftsjahr 2010      |                                               |                                                       |                                         | Geschäftsjahr 2009      |                                               |
|----------------------------------------------|-------------------------|-----------------------------------------------|-------------------------------------------------------|-----------------------------------------|-------------------------|-----------------------------------------------|
|                                              | Anzahl der Bezugsrechte | Gewichteter durchschnittlicher Ausübungspreis | Gewichtete durchschnittliche Restlaufzeit (in Jahren) | Aggregierter innerer Wert (in Mio. EUR) | Anzahl der Bezugsrechte | Gewichteter durchschnittlicher Ausübungspreis |
| Bestand zu Beginn des Berichtszeitraums      | 2.627.742               | 73,89 EUR                                     |                                                       |                                         | 5.097.083               | 73,60 EUR                                     |
| gewährt                                      | –                       | –                                             |                                                       |                                         | –                       | –                                             |
| ausgeübt                                     | – 687.605               | 74,59 EUR                                     |                                                       |                                         | –                       | –                                             |
| abgelaufen                                   | – 888.210               | 72,54 EUR                                     |                                                       |                                         | – 2.213.111             | 73,25 EUR                                     |
| verfallen                                    | – 116.495               | 74,42 EUR                                     |                                                       |                                         | – 152.015               | 73,81 EUR                                     |
| abgegolten                                   | –                       | –                                             |                                                       |                                         | – 104.215               | 73,39 EUR                                     |
| <b>Bestand am Ende des Berichtszeitraums</b> | <b>935.432</b>          | <b>74,59 EUR</b>                              | <b>0,13</b>                                           | <b>3</b>                                | <b>2.627.742</b>        | <b>73,89 EUR</b>                              |
| davon ausübbar                               | 935.432                 | 74,59 EUR                                     | 0,13                                                  | 3                                       | 2.627.742               | 73,89 EUR                                     |

Zum 30. September 2009 betrug die gewichtete durchschnittliche Restlaufzeit der ausstehenden Aktienoptionen 0,8 Jahre; der aggregierte innere Wert betrug 0 EUR.

Die folgende Tabelle fasst die Informationen zu den zum 30. September 2010 und 2009 ausstehenden Aktienoptionen zusammen:

| Ausübungspreise | 30. September 2010               |                                                       | 30. September 2009               |                                                       |
|-----------------|----------------------------------|-------------------------------------------------------|----------------------------------|-------------------------------------------------------|
|                 | Anzahl ausstehender Bezugsrechte | Gewichtete durchschnittliche Restlaufzeit (in Jahren) | Anzahl ausstehender Bezugsrechte | Gewichtete durchschnittliche Restlaufzeit (in Jahren) |
| 72,54 EUR       | –                                | –                                                     | 898.050                          | 0,1                                                   |
| 74,59 EUR       | 935.432                          | 0,1                                                   | 1.729.692                        | 1,1                                                   |

### Informationen zum beizulegenden Zeitwert

Das Unternehmen verwendet ein Optionspreismodell zur Berechnung der beizulegenden Zeitwerte der ausgegebenen Bezugsrechte. Dieses Modell wurde entwickelt, um die beizulegenden Zeitwerte von Optionen zu bestimmen, für die keine Ausübungsbeschränkungen gelten. Optionspreismodelle basieren auf stark subjektiven Annahmen. Dies beinhaltet auch die erwartete Volatilität des Aktienkurses. Der beizulegende Zeitwert betrug zum 30. September 2010 für Zusagen aus dem Geschäftsjahr 2006 pro ausstehendes Bezugsrecht 4,06 EUR.

## II. Instrumente mit Barabgeltung

### Wertsteigerungsrechte (Stock Appreciation Rights)

In den Fällen, in denen die jeweils geltenden landesrechtlichen Vorschriften es nicht erlauben, Aktienoptionen auszugeben, gewährt das Unternehmen Wertsteigerungsrechte an seine Mitarbeiter zu den Bedingungen des Siemens Aktienoptionsplans 2001. Die Ausnahme dabei ist, dass die Wertsteigerungsrechte nur in bar bedient werden dürfen.

Nachstehende Tabelle stellt die Entwicklung der Wertsteigerungsrechte und deren gewichtete durchschnittliche Ausübungspreise dar:

|                                              | Geschäftsjahr 2010    |                                               | Geschäftsjahr 2009    |                                               |
|----------------------------------------------|-----------------------|-----------------------------------------------|-----------------------|-----------------------------------------------|
|                                              | Wertsteigerungsrechte | Gewichteter durchschnittlicher Ausübungspreis | Wertsteigerungsrechte | Gewichteter durchschnittlicher Ausübungspreis |
| Bestand zu Beginn des Berichtszeitraums      | 54.945                | 73,85 EUR                                     | 138.485               | 73,58 EUR                                     |
| gewährt                                      | –                     | –                                             | –                     | –                                             |
| ausgeübt                                     | –                     | –                                             | –                     | –                                             |
| verfallen / abgegolten / abgelaufen          | – 21.500 <sup>1</sup> | 72,69 EUR                                     | – 83.540              | 73,41 EUR                                     |
| <b>Bestand am Ende des Berichtszeitraums</b> | <b>33.445</b>         | <b>74,59 EUR</b>                              | <b>54.945</b>         | <b>73,85 EUR</b>                              |
| davon ausübbar                               | 33.445                | 74,59 EUR                                     | 54.945                | 73,85 EUR                                     |

<sup>1</sup> Setzt sich zusammen aus 19.890 abgelaufenen und 1.610 abgegoltenen Wertsteigerungsrechten mit einem gewichteten durchschnittlichen Ausübungspreis von 72,54 EUR beziehungsweise 74,59 EUR im Geschäftsjahr 2010.

Zur Bestimmung des beizulegenden Zeitwerts der Wertsteigerungsrechte basierte im Geschäftsjahr 2010 und 2009 die erwartete Volatilität auf historischen Volatilitäten der Siemens-Aktie, impliziten Volatilitäten gehandelter Siemens-Optionen mit ähnlichen Bedingungen und Merkmalen sowie bestimmten anderen Faktoren. Siemens bestimmte die erwartete Laufzeit unter Anwendung der vereinfachten Methode. Sie entspricht dem Durchschnitt der Haltefrist und der vertraglichen Laufzeit. Der risikofreie Zinssatz basiert auf dem geeigneter Staatsanleihen. Änderungen der subjektiven Annahmen können erheblichen Einfluss auf den ermittelten beizulegenden Zeitwert der Wertsteigerungsrechte haben.

### Virtuelle Aktien (Phantom Stock)

In den Fällen, in denen die jeweils geltenden landesrechtlichen Vorschriften die Ausgabe von Aktienzusagen nicht erlauben, räumt das Unternehmen seinen Mitarbeitern virtuelle Aktien (Phantom Stocks) ein. Für diese gelten die gleichen Bedingungen wie für die Siemens-Aktienzusagen. Die Ausnahme dabei ist, dass die Empfänger der Aktien am Ende des vierjährigen beziehungsweise dreijährigen Erdienungszeitraums den Gegenwert des Aktienpreises ausschließlich in Form eines Barausgleichs erhalten. Im Geschäftsjahr 2009 gewährte Siemens 159.787 virtuelle Aktien, 18.460 wurden erdient und übertragen, 14.327 virtuelle Aktien sind verfallen, und 12.604 virtuelle Aktien wurden abgegolten. Der Bestand zum 30. September 2009 belief sich damit auf 207.690 nicht erdiente virtuelle Aktien. Im Geschäftsjahr 2010 gewährte Siemens 11.372 virtuelle Aktien, 18.768 wurden erdient und übertragen, 14.478 virtuelle Aktien sind verfallen, und 17.476 virtuelle Aktien wurden abgegolten. Der Bestand zum 30. September 2010 belief sich damit auf 168.340 nicht erdiente virtuelle Aktien.

## 35 – Personalaufwand

|                                                  | Geschäftsjahr |               |
|--------------------------------------------------|---------------|---------------|
|                                                  | 2010          | 2009          |
| Löhne und Gehälter                               | 21.572        | 20.320        |
| Sozialabgaben und Aufwendungen für Unterstützung | 3.328         | 3.353         |
| Aufwendungen für Altersversorgung                | 778           | 996           |
|                                                  | <b>25.678</b> | <b>24.669</b> |

*Aufwendungen für Altersversorgung* beinhaltet den Aufwand für im Geschäftsjahr hinzuerworbene Versorgungsansprüche (Service Cost). Die erwartete Rendite des Fondsvermögens und den Zinsaufwand weist Siemens innerhalb des *Finanzergebnisses* aus.

Im Geschäftsjahr 2010 sind Aufwendungen in Höhe von 310 EUR aufgrund einer Sondervergütung für alle Mitarbeiter, die nicht dem oberen Management angehören, erfasst.

Im Geschäftsjahr 2010 beschäftigte Siemens auf Basis fortgeführter Aktivitäten durchschnittlich 402.700 (im Vj. 413.650) Mitarbeiter. Dabei sind die Teilzeitkräfte anteilig berücksichtigt. Die Mitarbeiter waren in folgenden Funktionen tätig:

| (in Tausend)                      | Geschäftsjahr |              |
|-----------------------------------|---------------|--------------|
|                                   | 2010          | 2009         |
| Produktion und Service            | 262,1         | 264,9        |
| Vertrieb                          | 77,8          | 82,8         |
| Forschung und Entwicklung         | 30,1          | 31,8         |
| Verwaltung und allgemeine Dienste | 32,7          | 34,2         |
|                                   | <b>402,7</b>  | <b>413,7</b> |

## 36 – Ergebnis je Aktie

| (Anzahl der Aktien in Tausend)                                                  | Geschäftsjahr |         |
|---------------------------------------------------------------------------------|---------------|---------|
|                                                                                 | 2010          | 2009    |
| Gewinn aus fortgeführten Aktivitäten                                            | 4.112         | 2.457   |
| Abzüglich: auf nicht beherrschende Anteile entfallender Teil                    | - 169         | - 205   |
| Gewinn aus fortgeführten Aktivitäten, der auf Aktionäre der Siemens AG entfällt | 3.943         | 2.252   |
| Gewichteter Durchschnitt ausstehender Aktien                                    | 868.244       | 864.818 |
| Effekt aus verwässernd wirkender Wandelanleihe und aktienbasierter Vergütung    | 9.236         | 6.929   |
| Gewichteter Durchschnitt ausstehender Aktien (voll verwässert)                  | 877.480       | 871.747 |
| Ergebnis je Aktie aus fortgeführten Aktivitäten                                 | 4,54          | 2,60    |
| Ergebnis je Aktie aus fortgeführten Aktivitäten (voll verwässert)               | 4,49          | 2,58    |

In die Berechnung des Ergebnisses je Aktie (voll verwässert) ist für die Geschäftsjahre 2010 und 2009 der gewichtete Durchschnitt von 1.709 Tausend Aktien beziehungsweise 2.695 Tausend Aktien nicht eingeflossen, da der Ausübungspreis der Optionen über dem durchschnittlichen Marktpreis der Stammaktien lag und eine Einbeziehung somit in den dargestellten Geschäftsjahren nicht verwässernd gewirkt hätte.

## 37 – Segmentinformationen

Siemens ist in Sektoren – Industry, Energy und Healthcare –, das Segment Equity Investments sowie die beiden Segmente Siemens IT Solutions and Services und Siemens Financial Services (SFS), die auch als Sektorübergreifende Geschäfte bezeichnet werden, aufgeteilt.

### Beschreibung der berichtspflichtigen Segmente

#### Sektoren

Das Portfolio unserer drei Sektoren umfasst Produkte, Lösungen und Dienstleistungen in Bereichen, die alle mehr oder weniger auf die Ursprünge von Siemens als Unternehmen der Elektroindustrie zurückgehen.

#### Industry

Der Sektor Industry bietet ein komplettes Spektrum von Produkten, Dienstleistungen und Lösungen für den effizienten Umgang mit Ressourcen und Energie sowie für Produktivitätssteigerungen in der Industrie und dem Infrastrukturbereich an. Seine integrierten Technologien sowie umfassenden Lösungen richten sich primär an industrielle Kunden, beispielsweise aus der Prozess- und Fertigungsindustrie, sowie an Kunden aus dem Infrastrukturbereich, insbesondere dem Transportwesen wie auch dem Bau- und Versorgungsbereich.

#### Energy

Der Sektor Energy bietet ein breites Spektrum von Produkten, Dienstleistungen und Lösungen zum Erzeugen, Übertragen und Verteilen von (elektrischer) Energie sowie zum Fördern, Verarbeiten und Transportieren von Öl und Gas. In erster Linie werden die Anforderungen der Energieversorger erfüllt, jedoch bedient der Sektor auch Industrieunternehmen, insbesondere im Bereich der Öl- und Gasindustrie.

#### Healthcare

Der Sektor Healthcare bietet Produkte und Komplettlösungen sowie Dienst- und Beratungsleistungen im Gesundheitswesen an und fungiert für seine Kunden als voll integrierter Diagnostikanbieter. Der Sektor verfügt über ein umfassendes Portfolio medizinischer Lösungen. Dieses umfasst nahezu die gesamte Wertschöpfungskette von medizinischer Bildgebung über Labordiagnostik bis zur klinischen IT.

#### Equity Investments

Equity Investments ist ein berichtspflichtiges Segment mit eigenem Management. Equity Investments beinhaltet Beteiligungen, die nach der Equity-Methode oder zu Anschaffungskosten bilanziert werden, sowie kurzfristig zur Veräußerung

verfügbare finanzielle Vermögenswerte, die nicht einem Sektor, Sektorübergreifenden Geschäft, SRE, Pensionen beziehungsweise Konzern-Treasury zugeordnet sind. Zum 30. September 2010 und 2009 werden unter anderem NSN, BSH und EN (siehe »Ziffer 4«) in Equity Investments berichtet.

#### Sektorübergreifende Geschäfte

##### Siemens IT Solutions and Services

Siemens IT Solutions and Services erbringt Informations- und Kommunikationsdienstleistungen vorrangig für Kunden im gewerblichen und industriellen Bereich, im Energie-, Gesundheits- und Dienstleistungsbereich sowie im öffentlichen Bereich. Siemens IT Solutions and Services entwirft, erstellt und betreibt sowohl eigenständige als auch großräumig angelegte Informations- als auch Kommunikationsinfrastrukturen.

##### Siemens Financial Services (SFS)

Siemens Financial Services stellt eine Vielzahl von Finanzdienstleistungen und -produkten sowohl für fremde Dritte als auch für Siemens-Einheiten und deren Kunden zur Verfügung.

#### Überleitung Konzernabschluss

In der Position Überleitung Konzernabschluss werden Geschäftsaktivitäten und Themen ausgewiesen, die nicht in direktem Zusammenhang mit den berichtspflichtigen Segmenten von Siemens stehen.

#### Zentral gesteuerte Portfolioaktivitäten

Beginnend mit dem ersten Quartal des Geschäftsjahrs 2010 enthalten die Segmentinformationen eine Zeile für zentral verantwortete Aktivitäten, die in der Regel veräußert oder eingestellt werden sollen. Im Wesentlichen umfasst diese Zeile derzeit das Geschäft mit Bestückungsautomaten für die Elektronikfertigung (Electronics-Assembly-Systems-Geschäft) sowie Restaktivitäten aus der Veräußerung des ehemaligen Communications-(Com-)Geschäfts. Die Angaben in der neuen Zeile Zentral gesteuerte Portfolioaktivitäten sowie in den Zentralen Posten (siehe unten) sind vergleichbar dargestellt.

#### Siemens Real Estate (SRE)

Siemens Real Estate ist Eigentümer eines erheblichen Teils der Liegenschaften und Gebäude von Siemens und für deren Management zuständig. Das Dienstleistungsangebot umfasst die Entwicklung von Immobilienprojekten, die Veräußerung von Immobilien, die Vermögensverwaltung sowie das Miet- und Service-Management. Derzeit ist SRE dabei, weitere Konzernimmobilien bei sich zu bündeln. Im Geschäftsjahr 2010

wurden Vermögenswerte mit einem Buchwert in Höhe von 872 EUR auf SRE übertragen.

### **Zentrale Posten und Pensionen**

Zentrale Posten und Pensionen enthalten Aufwendungen der Konzernzentrale wie die Personalkosten für Zentralabteilungen. Ferner umfassen sie die Ergebnisse aus zentral verantworteten Projekten und nicht den Segmenten zugeordneten Beteiligungen oder die Ergebnisse aus zentralen derivativen Finanzgeschäften sowie, seit dem Geschäftsjahr 2010, Kosten aus zentral verantworteten Aktivitäten in Zusammenhang mit der Ausgliederung von Geschäften, die im Zeitpunkt der Realisierung des Veräußerungsgewinns oder -verlusts dem entsprechenden Segment zugeordnet werden. Die Position Pensionen beinhaltet die nicht den Segmenten, SRE und Zentral gesteuerten Portfolioaktivitäten zugeordneten Aufwendungen und Erträge der Gesellschaft aus Pensionsthemen.

Beginnend mit dem Geschäftsjahr 2011 werden Infrastrukturkosten, die derzeit in den Zentralen Posten berichtet werden, auf die Segmente, SRE sowie die Zentral gesteuerten Portfolioaktivitäten umgelegt. Die Kosten für Unternehmensleitung sowie die zentrale Forschungsabteilung verbleiben in den Zentralen Posten. Die Vorjahresangaben werden vergleichbar dargestellt werden.

### **Konsolidierungen, Konzern-Treasury und sonstige Überleitungspositionen**

Konsolidierungen, Konzern-Treasury und sonstige Überleitungspositionen umfassen die Konsolidierungen von Geschäftsbeziehungen zwischen den Segmenten, bestimmte Überleitungs- und Umgliederungsthemen sowie die Aktivitäten der Konzern-Treasury. Sie schließen auch Zinserträge und Zinsaufwendungen ein, zum Beispiel Zinsen, die nicht den Segmenten oder den Zentral gesteuerten Portfolioaktivitäten zugeordnet sind (Finanzierungszinsen), sowie Zinsen in Zusammenhang mit Aktivitäten der Konzern-Treasury oder zinsbezogene Konsolidierungs- und Überleitungseffekte.

### **Messgrößen der Segmente**

Die für die Segmentinformationen angewendeten Bilanzierungsregeln basieren grundsätzlich auf den für Siemens angewendeten Bilanzierungsregeln, die in »Ziffer 2« beschrieben sind. Jedoch werden Leasingtransaktionen für die interne Berichterstattung und die Segmentberichterstattung als Operating-Leasing klassifiziert. Auf die Konzernzentrale entfallende Gemeinkosten werden grundsätzlich nicht den Segmenten zugewiesen. Konzerninterne Transaktionen erfolgen zu Marktpreisen.

### **Ergebnis der Sektoren, von Equity Investments sowie von Siemens IT Solutions and Services**

Der Vorstand der Siemens AG ist für die Beurteilung des Geschäftserfolgs der Segmente verantwortlich. Als Erfolgsgröße der Sektoren, von Equity Investments sowie von Siemens IT Solutions and Services hat das oberste Entscheidungsgremium das Ergebnis vor Finanzierungszinsen, bestimmten Pensionsaufwendungen und Ertragsteuern (Ergebnis) bestimmt. Dem Ergebnis werden verschiedene Sachverhalte nicht zugerechnet, die der Vorstand als nicht indikativ für den Erfolg der Sektoren, von Equity Investments sowie von Siemens IT Solutions and Services erachtet. Für das Geschäftsjahr 2010 hat der Vorstand eine unter den Zentralen Posten enthaltene Sondervergütung genehmigt, die im Geschäftsjahr 2011 vorwiegend auf die Sektoren verteilt werden wird. Das Ergebnis stellt eine von kapitalmarktbezogenen Finanzierungsentscheidungen losgelöste Messgröße für den operativen Geschäftserfolg dar (zu Finanzierungssachverhalten bei Equity Investments siehe nachfolgender Absatz). Die wesentlichen Themen, die nicht Bestandteil des Ergebnisses sind, werden unten angegeben.

Bei den im Ergebnis nicht enthaltenen Finanzierungszinsen handelt es sich um alle Zinserträge und Zinsaufwendungen mit Ausnahme der Zinserträge aus Kundenforderungen, aus den Sektoren, aus Equity Investments sowie aus Siemens IT Solutions and Services zugerechneten Zahlungsmitteln sowie der Zinsaufwendungen auf Lieferantenverbindlichkeiten. Finanzierungszinsen sind vom Ergebnis ausgenommen, da Finanzierungsentscheidungen im Regelfall zentral getroffen werden. Equity Investments beinhaltet Zinsen und Wertberichtigungen sowie Wertaufholungen auf langfristige Darlehen, die an in Equity Investments berichtete Beteiligungen, im Wesentlichen NSN, gewährt wurden.

Ähnlich verhält es sich mit Pensionsthemen. Auch hier werden wesentliche Grundsatzentscheidungen zentral getroffen. Im Ergebnis ist daher im Wesentlichen nur der Aufwand aus im Geschäftsjahr hinzuerworbenen Versorgungsansprüchen (»Service Cost«) enthalten. Die übrigen regelmäßig anfallenden Pensions- und pensionsähnlichen Aufwendungen (einschließlich der Beiträge zum deutschen Pensionsversicherungsverein und der Kosten für die Verwaltung der Pensionspläne) werden in der Zeile Zentrale Posten und Pensionen ausgewiesen. Kürzungen von Pensionsplänen sind als eine Teilrück- erstattung aus nachzuverrechnendem Dienstzeitaufwand zu betrachten, die im Segmentergebnis wirkt.

Auch Ertragsteuern sind nicht Bestandteil des Ergebnisses, da der Steueraufwand nur rechtlichen Einheiten zugeordnet wird. Die rechtlichen Einheiten entsprechen im Regelfall nicht der Struktur der Segmente.

Die Auswirkungen bestimmter Rechts- und Compliance-Themen sind nicht Bestandteil des Ergebnisses, wenn diese aufgrund ihres Betrags und ihrer Unregelmäßigkeit zu einer Verzerrung des Geschäftsergebnisses führen würden und dieses damit nicht mehr aussagefähig wäre für die Entwicklung der Sektoren, von Equity Investments sowie von Siemens IT Solutions and Services. Dies gilt ebenso für Themen, die mehr als einem berichtspflichtigen Segment, SRE und/oder den Zentral gesteuerten Portfolioaktivitäten zuzuordnen sind oder einen Konzern- oder zentralen Charakter aufweisen.

Das Ergebnis von Equity Investments beinhaltet im Wesentlichen das Ergebnis aus den in Equity Investments berichteten Beteiligungen, wie beispielsweise den Gewinnanteil von assoziierten Unternehmen oder Dividenden aus Beteiligungen, die nicht nach der Equity-Methode bilanziert werden, das Ergebnis aus dem Verkauf von Anteilen an Beteiligungen sowie Wertminderungen von Beteiligungen oder Wertaufholungen. Das Ergebnis beinhaltet auch Zinsen und Wertminderungen sowie Wertaufholungen auf langfristige Darlehen, die an in Equity Investments berichtete Beteiligungen, im Wesentlichen NSN, gewährt wurden.

#### **Ergebnis des Segments SFS:**

Das Ergebnis des Segments SFS ist das Ergebnis vor Ertragsteuern. Im Gegensatz zu der Erfolgsgröße für die Sektoren, für Equity Investments sowie für Siemens IT Solutions and Services sind die Zinserträge und Zinsaufwendungen ein ergebnisbestimmender Faktor für SFS.

#### **Messgrößen des Vermögens:**

Das Management hat das Vermögen zur Grundlage für die Beurteilung der Kapitalintensität der Sektoren, von Equity Investments sowie von Siemens IT Solutions and Services bestimmt (Nettovermögen). Das Vermögen berechnet sich analog zur Erfolgsgröße. Es ergibt sich vorrangig aus dem Gesamtvermögen der Konzernbilanz, abzüglich der konzern-internen Finanzforderungen und Ausleihungen sowie abzüglich der Steuerforderungen, da die korrespondierenden Aufwendungen und Erträge nicht in das Ergebnis einfließen. Darüber hinaus werden zinslose Verbindlichkeiten mit Ausnahme von Steuerverbindlichkeiten (zum Beispiel Verbindlichkeiten aus Lieferungen und Leistungen) und bestimmte

Rückstellungen abgezogen. Das Vermögen von Equity Investments beinhaltet bestimmte Gesellschafterdarlehen, die an in Equity Investments berichtete Beteiligungen, im Wesentlichen NSN, gewährt wurden. Im Gegensatz dazu ist das Vermögen von SFS das Gesamtvermögen. Eine Überleitung von Vermögen – wie in den Segmentinformationen angegeben – auf das Gesamtvermögen in der Konzernbilanz wird unten dargestellt.

#### **Auftragseingang:**

Der Auftragseingang entspricht grundsätzlich dem geschätzten Umsatzvolumen der angenommenen Aufträge unter Berücksichtigung von Änderungen und Korrekturen des Auftragswerts. Absichtserklärungen sind nicht Inhalt des Auftragseingangs. Der Auftragseingang ist eine zusätzliche Information und wird auf freiwilliger Basis berichtet. Er ist nicht Teil des geprüften Konzernabschlusses.

#### **Definition Free Cash Flow:**

Die Segmentinformationen zeigen sowohl den Free Cash Flow als auch Investitionen in Sachanlagen und Immaterielle Vermögenswerte. Der Free Cash Flow der Sektoren, von Equity Investments sowie Siemens IT Solutions and Services errechnet sich aus dem Mittelzufluss/-abfluss aus laufender Geschäftstätigkeit, abzüglich Investitionen in Immaterielle Vermögenswerte und Sachanlagen. Er schließt die in Zusammenhang mit Finanzierungszinsen, Ertragsteuern und bestimmten anderen Sachverhalten stehenden Zahlungen und Erlöse aus, entsprechend der von Siemens festgelegten Definition für Ergebnis und Vermögen. Der Free Cash Flow von Equity Investments beinhaltet Zinsen auf Gesellschafterdarlehen, die an in Equity Investments berichtete Beteiligungen, im Wesentlichen NSN, gewährt wurden. Kürzungen von Pensionsplänen sind als eine Teilrückerstattung aus nachzuverrechnendem Dienstzeitaufwand zu betrachten, die im Free Cash Flow der Segmente wirkt. Der Free Cash Flow von SFS, einem Finanzdienstleister, beinhaltet die in Zusammenhang mit Finanzierungszinsen stehenden Zahlungen; Ertragsteuerzahlungen und -erstattungen von SFS sind ausgeschlossen.

#### **Abschreibungen:**

Die Abschreibungen in den Segmentinformationen beinhalten die Abschreibungen und Wertminderungen auf Sachanlagen, nach Abzug von Wertaufholungen, sowie die Abschreibungen und Wertminderungen auf Immaterielle Vermögenswerte nach Abzug von Wertaufholungen. Die Wertminderungen auf Geschäfts- und Firmenwerte sind nicht enthalten.



### Messgrößen der Zentral gesteuerten Portfolioaktivitäten und SRE

Die Messgrößen für die Zentral gesteuerten Portfolioaktivitäten entsprechen denen der Sektoren. SRE verwendet die gleichen Messgrößen wie SFS.

### Überleitung Siemens-Konzernabschluss

Die folgende Tabelle zeigt die Überleitung von der Summe Vermögen der Sektoren sowie von Equity Investments und den Sektorübergreifenden Geschäften auf das Gesamtvermögen in der Konzernbilanz von Siemens.

|                                                                            | 30. September  |               |
|----------------------------------------------------------------------------|----------------|---------------|
|                                                                            | 2010           | 2009          |
| Vermögen der Sektoren                                                      | 22.771         | 24.958        |
| Vermögen von Equity Investments                                            | 3.319          | 3.833         |
| Vermögen der Sektorübergreifenden Geschäfte                                | 12.356         | 11.945        |
| <b>Vermögen Summe Segmente</b>                                             | <b>38.446</b>  | <b>40.736</b> |
| Überleitung:                                                               |                |               |
| Vermögen Zentral gesteuerte Portfolioaktivitäten                           | - 574          | - 543         |
| Vermögen SRE                                                               | 5.067          | 4.489         |
| Vermögen Zentrale Posten und Pensionen                                     | - 10.447       | - 7.445       |
| Konsolidierungen, Konzern-Treasury und sonstige Überleitungspositionen:    |                |               |
| Vermögensorientierte Anpassungen:                                          |                |               |
| Konzerninterne Finanzforderungen und Ausleihungen                          | 24.813         | 28.083        |
| Steuerforderungen                                                          | 4.625          | 3.771         |
| Verbindlichkeitsorientierte Anpassungen:                                   |                |               |
| Pensionen und pensionsähnliche Verpflichtungen                             | 8.464          | 5.938         |
| Verbindlichkeiten und Rückstellungen                                       | 41.637         | 38.112        |
| Zur Veräußerung bestimmte Vermögenswerte und Verbindlichkeiten             | -              | -             |
| Konsolidierung, Konzern-Treasury und Sonstiges                             | - 9.204        | - 18.215      |
| Summe Konsolidierung, Konzern-Treasury und sonstige Überleitungspositionen | 70.335         | 57.689        |
| <b>Gesamtvermögen in der Siemens-Konzernbilanz</b>                         | <b>102.827</b> | <b>94.926</b> |

Zentrale Posten und Pensionen enthalten in den Geschäftsjahren 2010 und 2009 in der Spalte Ergebnis minus 1.292 (im Vj. minus 1.343) EUR für Zentrale Posten sowie minus 188 (im Vj. minus 372) EUR für Pensionen. Zentrale Posten enthalten im Geschäftsjahr 2010 höhere personalbedingte Aufwendungen, darin Aufwendungen in Höhe von 310 EUR aufgrund einer Sondervergütung für alle Mitarbeiter, die nicht dem oberen Management angehören. Nachdem die Aufteilung dieser Sondervergütung im ersten Quartal des Geschäftsjahrs 2011 ermittelt worden ist, werden die Aufwendungen im Geschäftsjahr 2011, überwiegend auf die Sektoren, verteilt. Zentrale Posten im Geschäftsjahr 2010 enthalten außerdem, nach Abzug damit in Zusammenhang stehender Kosten, Erträge von 96 EUR aus der D&O-Versicherung der Gesellschaft und aus Vergleichsvereinbarungen mit ehemaligen Vorstands- und Aufsichtsratsmitgliedern in Zusammenhang mit Compliance-Sachverhalten sowie Erträge von 40 EUR aus der vereinbarten Rückführung eines durch die Behörden arrestierten Betrags. Für weitere Informationen hierzu siehe »Ziffer 30«. Zentrale Posten im Geschäftsjahr 2010 enthalten außerdem Aufwendungen in Zusammenhang mit der Ausgliederung von Siemens IT Solutions and Services.

Zentrale Posten enthalten im Geschäftsjahr 2009 Nettoaufwendungen von 235 EUR für Leistungen aus Anlass der Beendigung von Arbeitsverhältnissen im Rahmen des SG&A-Programms und sonstiger andauernder personalbezogener Restrukturierungsmaßnahmen (siehe »Ziffer 5«). Außerdem beinhalten Zentrale Posten im Geschäftsjahr 2009 Aufwendungen in Höhe von 95 EUR für externe Berater, die in Zusammenhang mit den Untersuchungen von mutmaßlichen Verstößen gegen Antikorruptionsgesetze und ähnliche Angelegenheiten sowie für Maßnahmen zur Beseitigung von Schwächen des internen Kontrollsystems beauftragt wurden. Pensionen enthalten im Geschäftsjahr 2009 Aufwendungen in Höhe von 106 EUR in Zusammenhang mit unserer Pflichtmitgliedschaft im deutschen Pensionssicherungsverein (PSV). Die gestiegenen aufwandnahen Versicherungsbeiträge sind überwiegend durch eine hohe Anzahl von Insolvenzen anderer PSV-Mitglieder verursacht.

Die folgende Tabelle leitet den Free Cash Flow, die Investitionen in Immaterielle Vermögenswerte und Sachanlagen sowie die Abschreibungen – wie in den Segmentinformationen berichtet – auf den entsprechenden Wert der Konzern-Kapitalflussrechnung über.

|                                                            | Free Cash Flow<br>(I) = (II) – (III) |              | Mittelzufluss/-abfluss<br>aus laufender<br>Geschäftstätigkeit (II) |              | Investitionen in Imma-<br>terielle Vermögenswerte<br>und Sachanlagen (III) |                | Abschreibungen |              |
|------------------------------------------------------------|--------------------------------------|--------------|--------------------------------------------------------------------|--------------|----------------------------------------------------------------------------|----------------|----------------|--------------|
|                                                            | Geschäftsjahr                        |              | Geschäftsjahr                                                      |              | Geschäftsjahr                                                              |                | Geschäftsjahr  |              |
|                                                            | 2010                                 | 2009         | 2010                                                               | 2009         | 2010                                                                       | 2009           | 2010           | 2009         |
| <b>Segmentinformationen<br/>(fortgeführte Aktivitäten)</b> | <b>7.111</b>                         | <b>3.786</b> | <b>9.447</b>                                                       | <b>6.246</b> | <b>- 2.336</b>                                                             | <b>- 2.460</b> | <b>2.973</b>   | <b>2.839</b> |
| Nicht fortgeführte Aktivitäten                             | - 98                                 | - 145        | - 98                                                               | - 145        | -                                                                          | -              | -              | -            |
| Wertminderungen auf<br>Geschäfts- und Firmenwerte          | -                                    | -            | -                                                                  | -            | -                                                                          | -              | 1.145          | 32           |
| <b>Siemens Konzern-Kapitalflussrechnung</b>                | <b>7.013</b>                         | <b>3.641</b> | <b>9.349</b>                                                       | <b>6.101</b> | <b>- 2.336</b>                                                             | <b>- 2.460</b> | <b>4.118</b>   | <b>2.871</b> |

### Zusätzliche Segmentangaben

Das Ergebnis von SFS enthält im Geschäftsjahr 2010 Zinserträge in Höhe von 621 (im Vj. 642) EUR sowie Zinsaufwendungen in Höhe von 282 (im Vj. 377) EUR.

Langfristige Vermögenswerte bestehen aus Sachanlagen, Geschäfts- und Firmenwerten sowie Sonstigen Immateriellen Vermögenswerten.

## 38 – Informationen nach Regionen

|                                                  | Umsätze nach Sitz<br>des Kunden |               | Umsätze nach Sitz<br>der Gesellschaften |               |
|--------------------------------------------------|---------------------------------|---------------|-----------------------------------------|---------------|
|                                                  | 2010                            | 2009          | 2010                                    | 2009          |
| Europa, GUS, Afrika,<br>Nahe und Mittlerer Osten | 41.426                          | 43.288        | 45.529                                  | 47.817        |
| Amerika                                          | 20.643                          | 20.754        | 20.364                                  | 20.215        |
| Asien, Australien                                | 13.909                          | 12.609        | 10.085                                  | 8.619         |
| <b>Siemens</b>                                   | <b>75.978</b>                   | <b>76.651</b> | <b>75.978</b>                           | <b>76.651</b> |
| <i>davon Deutschland</i>                         | <i>11.432</i>                   | <i>11.525</i> | <i>19.715</i>                           | <i>20.357</i> |
| <i>davon Ausland</i>                             | <i>64.547</i>                   | <i>65.126</i> | <i>56.263</i>                           | <i>56.294</i> |
| <i>darin USA</i>                                 | <i>14.772</i>                   | <i>15.684</i> | <i>15.915</i>                           | <i>16.387</i> |

## 39 – Transaktionen mit nahestehenden Unternehmen und Personen

### Gemeinschaftsunternehmen und assoziierte Unternehmen

Siemens unterhält mit vielen Gemeinschaftsunternehmen und assoziierten Unternehmen Beziehungen im Rahmen der gewöhnlichen Geschäftstätigkeit. Dabei kauft und verkauft Siemens eine große Vielfalt von Produkten und Dienstleistungen grundsätzlich zu Marktbedingungen. Informationen zu unseren Tochterunternehmen, Gemeinschaftsunternehmen und assoziierten Unternehmen im Geschäftsjahr 2010 finden sich unter »Ziffern 19 und 42«. Informationen zu unseren Tochterunternehmen, Gemeinschaftsunternehmen und assoziierten Unternehmen im Geschäftsjahr 2009 finden sich in der Aufstellung des Anteilsbesitzes, die gesondert im elektronischen Bundesanzeiger veröffentlicht wurde.

Die erbrachten Lieferungen und Leistungen und sonstige Erträge aus Geschäftsvorfällen mit Gemeinschaftsunternehmen und assoziierten Unternehmen sowie umgekehrt die empfangenen Lieferungen und Leistungen und sonstige Aufwendungen aus entsprechenden Geschäftsvorfällen stellen sich wie folgt dar:

|                                                  | Langfristige<br>Vermögenswerte<br>30. September |               |
|--------------------------------------------------|-------------------------------------------------|---------------|
|                                                  | 2010                                            | 2009          |
| Europa, GUS, Afrika,<br>Nahe und Mittlerer Osten | 16.587                                          | 16.509        |
| Amerika                                          | 13.068                                          | 13.233        |
| Asien, Australien                                | 2.825                                           | 2.428         |
| <b>Siemens</b>                                   | <b>32.480</b>                                   | <b>32.170</b> |
| <i>darin Deutschland</i>                         | <i>7.284</i>                                    | <i>7.542</i>  |
| <i>darin USA</i>                                 | <i>11.729</i>                                   | <i>11.977</i> |

|                          | Erbrachte Lieferungen und Leistungen sowie sonstige Erträge |              | Empfangene Lieferungen und Leistungen sowie sonstige Aufwendungen |            |
|--------------------------|-------------------------------------------------------------|--------------|-------------------------------------------------------------------|------------|
|                          | Geschäftsjahr                                               |              | Geschäftsjahr                                                     |            |
|                          | 2010                                                        | 2009         | 2010                                                              | 2009       |
| Gemeinschaftsunternehmen | 105                                                         | 173          | 31                                                                | 217        |
| Assoziierte Unternehmen  | 920                                                         | 1.061        | 271                                                               | 230        |
|                          | <b>1.025</b>                                                | <b>1.234</b> | <b>302</b>                                                        | <b>447</b> |

Die Forderungen und Verbindlichkeiten der Gesellschaft gegenüber Gemeinschaftsunternehmen und assoziierten Unternehmen stellen sich wie folgt dar:

|                         | Forderungen 30. September |            | Verbindlichkeiten 30. September |           |
|-------------------------|---------------------------|------------|---------------------------------|-----------|
|                         | 2010                      | 2009       | 2010                            | 2009      |
|                         | Gemeinschaftsunternehmen  | 35         | 25                              | 7         |
| Assoziierte Unternehmen | 172                       | 129        | 41                              | 73        |
|                         | <b>207</b>                | <b>154</b> | <b>48</b>                       | <b>86</b> |

Die zum 30. September 2010 an Gemeinschaftsunternehmen und assoziierte Unternehmen gewährten Darlehen belaufen sich insgesamt auf 427 EUR und beinhalten eine Tranche in Höhe von nominal 250 EUR aus einer Vereinbarung über ein Gesellschafterdarlehen (*Shareholder Loan Agreement*) zwischen Siemens und NSN mit einem jährlichen Zinssatz von 7,5 Prozent über dem 3-Monate-EURIBOR und Fälligkeit im Geschäftsjahr 2013, ein zinsloses Darlehen an NSN in Höhe von 32 EUR sowie ein zinsloses Darlehen an EN in Höhe von 13 EUR. Die zum 30. September 2009 an Gemeinschaftsunternehmen und assoziierte Unternehmen gewährten Darlehen beliefen sich auf 869 EUR. Hierin enthalten waren drei Tranchen in Höhe von jeweils nominal 250 EUR aus dem *Shareholder Loan Agreement* zwischen Siemens und NSN sowie ein zinsloses Darlehen an NSN in Höhe von 26 EUR. Ende März 2010 wandelten sowohl Siemens als auch Nokia jeweils einen Betrag des Gesellschafterdarlehens in Höhe von 500 EUR in vorrangiges Eigenkapital. Durch diese Wandlung erhöhte sich unsere Beteiligung an NSN um 500 EUR. Aus der Wandlung resultiert keine Veränderung in den bestehenden Beteiligungsverhältnissen zwischen Siemens und Nokia. Die zum 30. September 2010 an Gemeinschaftsunternehmen gewährten Dar-

lehen belaufen sich auf 4 EUR (im Vj. 5 EUR). Das Unternehmen überprüft regelmäßig im Rahmen seiner Geschäftstätigkeit die an Gemeinschaftsunternehmen und assoziierte Unternehmen gewährten Darlehen sowie Forderungen gegenüber Gemeinschaftsunternehmen und assoziierten Unternehmen, hierin auch NSN. Im Geschäftsjahr 2010 und 2009 resultierte aus dieser Überprüfung ein Nettoertrag, bezogen auf Wertberichtigungen, in Höhe von 25 EUR beziehungsweise ein Nettoverlust, bezogen auf Wertberichtigungen, in Höhe von 37 EUR. Zum 30. September 2010 betragen die Wertberichtigungen 35 EUR (im Vj. 47 EUR).

Zum 30. September 2010 betragen die an Gemeinschaftsunternehmen und assoziierte Unternehmen gewährten Garantien 5.483 EUR. Dieser Betrag beinhaltet die HERKULES-Verpflichtungen in Höhe von 3.090 EUR (im Vj. 5.740 EUR, einschließlich der HERKULES-Verpflichtungen von 3.490 EUR). Informationen zu den HERKULES-Verpflichtungen und zu Garantien in Zusammenhang mit der Einbringung des Carrier-Geschäfts in NSN sowie der SEN-Geschäftsaktivitäten in EN finden sich auch in »Ziffer 29«. Zum 30. September 2010 betragen die an Gemeinschaftsunternehmen gewährten Garantien 511 EUR (im Vj. 48 EUR). Zum 30. September 2010 bestanden Verpflichtungen zu Kapitaleinlagen in Gemeinschaftsunternehmen und assoziierte Unternehmen in Höhe von 303 (im Vj. 247) EUR, wovon 126 EUR gegenüber Gemeinschaftsunternehmen (im Vj. – EUR) bestanden. Weitere Informationen finden sich unter »Ziffer 29«.

### Pensionseinrichtungen

Informationen zur Finanzierung der wesentlichen Pensionspläne der Gesellschaft finden sich unter »Ziffer 24«. Im Geschäftsjahr 2010 wurde eine Verbindlichkeit aus einem anhaltenden Leasingengagement in Zusammenhang mit einer vorhergehenden Verkaufs- und Rückmiettransaktion mit durch den Siemens Pension-Trust e.V. kontrollierten Gesellschaften aufgelöst. Informationen hierzu finden sich unter »Ziffer 6«.

### Nahestehende Personen

Nahestehende Personen umfassen die Mitglieder des Vorstands und des Aufsichtsrats.

Im Geschäftsjahr 2010 erhielten die Mitglieder des Vorstands eine Barvergütung in Höhe von 24,2 (im Vj. 17,9) EUR. Der Geldwert aktienbasierter Vergütung betrug für das Geschäftsjahr 2010 10,0 (im Vj. 9,4) EUR. Im Geschäftsjahr 2010 wurden den Mitgliedern des Vorstands Beiträge zur BSAV in Höhe von 4,3 (im Vj. 4,5) EUR gewährt.

Die im Geschäftsjahr 2010 den Mitgliedern des Vorstands gewährte Vergütung sowie gewährten Leistungen betragen somit insgesamt 38,5 (im Vj. 31,8) EUR.

Die Aufwendungen in Zusammenhang mit aktienbasierter Vergütung sowie dem Share-Matching-Programm betragen im Geschäftsjahr 2010 8,3 EUR (im Vj. 5,2) EUR. Weiterführende Informationen zum Share-Matching-Programm finden sich unter »Ziffer 34«.

Darüber hinaus wurde im Geschäftsjahr 2009 mit einem ehemaligen Mitglied des Vorstands für die Laufzeit von 16 Monaten ab 1. Dezember 2008 eine Vereinbarung zu einem nachvertraglichen Wettbewerbsverbot (Non-Compete Agreement) getroffen. Dafür erhält er als Karenzentschädigung insgesamt 2.769.995 USD (rund 2,1 EUR), wovon er 1.846.667 USD als Einmalzahlung im Dezember 2008 erhalten hat; die Auszahlung des Restbetrags erfolgt in monatlichen Teilbeträgen in Höhe von jeweils 57.708 USD.

Die Vergütung des Aufsichtsrats umfasst eine feste Vergütung, eine kurzfristige variable Vergütung sowie eine langfristige variable Vergütung. Im Geschäftsjahr 2010 betrug die Vergütung der Mitglieder des Aufsichtsrats 4,0 (im Vj. 3,2) EUR. Hierin enthalten sind im Geschäftsjahr 2010 0,6 (im Vj. 0,7) EUR aus langfristiger variabler Vergütung.

Der Vergütungsbericht fasst die Grundsätze zusammen, die auf die Festlegung der Vergütung des Vorstands der Siemens AG Anwendung finden, und erläutert Höhe sowie Struktur der Vorstandseinkommen. Außerdem werden Grundsätze und Höhe der Vergütung des Aufsichtsrats beschrieben sowie Angaben zum Aktienbesitz von Vorstand und Aufsichtsrat gemacht. Der Vergütungsbericht, der Teil des Anhangs zum Konzernabschluss ist, findet sich im Corporate-Governance-Bericht in diesem Geschäftsbericht für das Geschäftsjahr 2010.

In den Geschäftsjahren 2010 und 2009 fanden keine weiteren bedeutenden Geschäftsvorfälle zwischen der Gesellschaft und anderen Mitgliedern des Vorstands und Aufsichtsrats statt.

Darüber hinaus sind oder waren einige Mitglieder des Aufsichtsrats und des Vorstands von Siemens im vergangenen Jahr in hochrangigen Positionen bei anderen Unternehmen tätig. Siemens unterhält zu fast allen diesen Unternehmen Beziehungen im Rahmen der gewöhnlichen Geschäftstätigkeit. Der Kauf und Verkauf eines breit gefächerten Angebots von Produkten und Dienstleistungen erfolgen dabei zu marktüblichen

Bedingungen. Dr. Josef Ackermann ist Vorsitzender des Vorstands der Deutsche Bank AG. Die Geschäfte zwischen Siemens und der Deutsche Bank AG erfolgen zu marktüblichen Bedingungen und umfassen Konsortialdienste bei Wertpapieremissionen, sonstige Investment-Banking-Dienstleistungen sowie Kredit-, Geldmarkt- und Devisentermingeschäfte sowie abwicklungsbezogene Bankdienstleistungen. Michael Diekmann ist Vorsitzender des Vorstands der Allianz SE. Die Geschäfte zwischen Siemens und Allianz SE erfolgen zu marktüblichen Bedingungen und umfassen das Versicherungsgeschäft sowie die Vermögensverwaltung.

## 40 – Honorare und Dienstleistungen des Abschlussprüfers

Die nachfolgende Tabelle zeigt die für Dienstleistungen des Abschlussprüfers Ernst & Young (E&Y) angefallenen Honorare im Geschäftsjahr 2010 und 2009:

| Art der Honorare                                              | Geschäftsjahr |             |
|---------------------------------------------------------------|---------------|-------------|
|                                                               | 2010          | 2009        |
| Abschlussprüfungsleistungen (Prüfungstätigkeiten)             | 40,9          | 40,5        |
| Andere Bestätigungsleistungen (prüfungsnahe Dienstleistungen) | 5,3           | 4,6         |
| Steuerberatungsleistungen                                     | 1,0           | 4,2         |
| Sonstige Leistungen                                           | 0,1           | –           |
| <b>Gesamt</b>                                                 | <b>47,3</b>   | <b>49,3</b> |

Die Posten Prüfungstätigkeiten und prüfungsnahe Dienstleistungen enthalten Honorare in Zusammenhang mit den unten beschriebenen Tätigkeiten, für die der Prüfungsausschuss vorab eine Genehmigung erteilt hat. Der Posten Steuerberatungsleistungen enthält im Wesentlichen Honorare für Unterstützungsleistungen in Zusammenhang mit der Dokumentation von Transferpreisen. Für Steuerberatungsdienstleistungen ist eine individuelle Vorabgenehmigung durch den Prüfungsausschuss erforderlich.

Von dem für das Geschäftsjahr 2010 berechneten Gesamthonorar entfallen 42% auf die Ernst & Young GmbH Wirtschaftsprüfungsgesellschaft, Deutschland.

### Grundsätze der Vorabgenehmigung durch den Prüfungsausschuss

Nach deutschem Recht wird der unabhängige Abschlussprüfer von Siemens durch die Hauptversammlung auf Empfehlung des Aufsichtsrats bestellt. Der Prüfungsausschuss des Aufsichtsrats bereitet die Empfehlung über die Wahl des unabhängigen Abschlussprüfers der Gesellschaft vor. Im Anschluss an die Bestellung des Abschlussprüfers erteilt der Prüfungsausschuss dem Abschlussprüfer den Prüfungsauftrag und genehmigt in alleiniger Zuständigkeit die Bedingungen und den Umfang der Prüfung sowie das Prüfungshonorar. Zudem überwacht er die Einhaltung der Unabhängigkeit des Abschlussprüfers.

Zur Sicherstellung der Integrität und Unabhängigkeit der Abschlussprüfung hat der Prüfungsausschuss von Siemens Grundsätze festgelegt, nach denen alle zulässigen Dienstleistungen, die durch den unabhängigen Abschlussprüfer erbracht werden, vor der Auftragserteilung zu genehmigen sind. Als Bestandteil dieses Genehmigungsprozesses hat der Prüfungsausschuss Grundsätze und Verfahren der Vorabgenehmigung geschaffen, nach denen der Prüfungsausschuss jährlich bestimmte, durch den unabhängigen Abschlussprüfer zu erbringende Leistungen im Voraus genehmigt. Nach diesen Grundsätzen ist es dem Abschlussprüfer von Siemens nicht erlaubt, sonstige nicht prüfungsbezogene Leistungen zu erbringen, die nach den Regelungen der U.S. Securities and Exchange Commission (SEC) oder des Public Company Accounting Oversight Board die Unabhängigkeit des Abschlussprüfers gefährden könnten. Zudem hat der Prüfungsausschuss eine Obergrenze für die Summe aller Honorare für prüfungsnahe Dienstleistungen eines Geschäftsjahrs festgelegt. Zu Beginn des Geschäftsjahrs 2010 wurde diese Obergrenze dahingehend gesenkt, dass die Honorare für nicht prüfungsbezogene Leistungen, die prüfungsnahe Dienstleistungen, Steuerberatungsleistungen und sonstige Dienstleistungen umfassen, nun einen Anteil von 30 % an den vereinbarten Prüfungshonoraren für das jeweilige Geschäftsjahr nicht übersteigen dürfen. Zuvor betrug die Obergrenze 40%; diese war nur auf prüfungsnahe Dienstleistungen anzuwenden.

Im Geschäftsjahr 2010 hat der Prüfungsausschuss E&Y für Prüfungstätigkeiten und prüfungsnahe Dienstleistungen generell eine Vorabgenehmigung erteilt. Hierzu gehören unter anderem folgende Leistungen:

#### Prüfungstätigkeiten:

- > Jährliche Prüfung des Konzernabschlusses und des finanzberichterstattungsbezogenen internen Kontrollsystems von Siemens,
- > prüferische Durchsicht der Konzern-Zwischenabschlüsse von Siemens,
- > Prüfungen und prüferische Durchsichten, die aufgrund von Gesetz oder sonstigen Vorschriften durchzuführen sind, einschließlich Prüfungen der nach den gesetzlichen Vorschriften der entsprechenden Länder zu erstellenden Abschlüsse der Siemens AG und ihrer Tochtergesellschaften,
- > Prüfungen von Eröffnungsbilanzen im Rahmen von Unternehmenserwerben, einschließlich Prüfungen in Zusammenhang mit Kaufpreisallokationen.

#### Prüfungsnahe Dienstleistungen:

- > Freiwillige Abschlussprüfungen nach lokalen Rechnungslegungsvorschriften,
- > Due-Diligence-Leistungen in Zusammenhang mit erfolgten oder beabsichtigten Unternehmenserwerben und Ausgliederungen, einschließlich der Unterstützung in Bilanzierungsfragen,
- > Post-Closing-Prüfungen,
- > Prüfungen sowie Bestätigungsleistungen in Zusammenhang mit Ausgliederungen,
- > Prüfbescheinigungen («Certificates»), die aufgrund von gesetzlicher, richtlinienbasierter oder vertraglicher Grundlage erforderlich sind,
- > Dienstleistungen hinsichtlich Fragen zu Bilanzierungs- und Bewertungsregeln sowie Vorschriften zur Berichterstattung, soweit sie auf einem Siemens-spezifischen Wissen des Abschlussprüfers beruhen, einschließlich
  - > Fragen hinsichtlich der Bilanzierung laufender oder geplanter Transaktionen,
  - > Unterstützung bei der Einführung und Durchsicht neuer oder aktualisierter Rechnungslegungsrichtlinien und -anforderungen,
  - > Schulungen hinsichtlich rechnungslegungsbezogener Themen,

- > Comfort Letter,
- > Prüfungen von Pensionsplänen,
- > SAS-70-Prüfungen,
- > Bescheinigungen auf Basis gesetzlicher Bestimmungen sowie diesbezügliche zulässige Unterstützungsleistungen,
- > Bescheinigungen und Prüfungen in Zusammenhang mit der EU-Richtlinie zur Beseitigung von Elektroschrott,
- > Bescheinigungen von Klauseln oder Kennzahlen aufgrund der Einhaltung von vertraglichen Vereinbarungen,
- > Bescheinigungen neben Prüfungsleistungen, die aufgrund von Gesetz oder sonstigen regulatorischen Vorschriften durchzuführen sind.

Dienstleistungen, für die keine generelle Vorabgenehmigung als Prüfungstätigkeit oder prüfungsnaher Dienstleistung erteilt wird, unterliegen einer individuellen Vorabgenehmigung durch den Prüfungsausschuss. Eine Genehmigung wird nicht erteilt, wenn die Dienstleistung einer Kategorie angehört, die nach derzeitiger Gesetzeslage nicht erlaubt ist, oder wenn sie nicht mit den vier Prinzipien zur Sicherstellung der Unabhängigkeit des Abschlussprüfers übereinstimmt, die von der U.S. Securities and Exchange Commission festgelegt wurden: (1) Der Abschlussprüfer darf keine Managementfunktionen übernehmen oder als Angestellter des Mandanten agieren; (2) der Abschlussprüfer darf das Ergebnis seiner eigenen Arbeit nicht prüfen; (3) ein Abschlussprüfer darf die Rolle eines Interessenvertreters seines Mandanten nicht übernehmen und (4) durch die Erbringung einer Dienstleistung darf es nicht zu einem gemeinsamen oder entgegenstehenden Interesse zwischen Abschlussprüfer und dem geprüften Unternehmen kommen (Interessenkonflikt).

Obwohl die Erbringung von nicht prüfungsnahen Dienstleistungen – mit Ausnahme von bestimmten Arten von nicht prüfungsbezogenen Dienstleistungen, die in den SEC-Vorschriften aufgeführt sind – nicht gesetzlich verboten ist, hat der Prüfungsausschuss als Grundsatz festgelegt, den Abschlussprüfer nicht mit der Erbringung von nicht prüfungsnahen Dienstleistungen zu beauftragen, es sei denn, es liegt ein überragender Vorteil für die Gesellschaft darin, den Abschlussprüfer zu beauftragen, und es kann eindeutig belegt werden, dass die Unabhängigkeit dadurch nicht gefährdet ist.

## 41 – Corporate Governance

Die Siemens Aktiengesellschaft ist derzeit das einzige in den Konzernabschluss einbezogene deutsche börsennotierte Unternehmen. Dieses Unternehmen hat die nach § 161 des Aktiengesetzes vorgeschriebenen Erklärungen abgeben und ihren Aktionären zugänglich gemacht.



## 42 – Anteilsbesitzliste gemäß § 313 HGB

| Stand 30.09.2010                                                                           | Kapitalanteil<br>in % |
|--------------------------------------------------------------------------------------------|-----------------------|
| <b>Tochterunternehmen</b>                                                                  |                       |
| <b>Deutschland</b> (149 Gesellschaften)                                                    |                       |
| A. Friedr. Flender Grundstücksmanagement-<br>gesellschaft mbH & Co. OHG, München           | 100 <sup>9</sup>      |
| Airport Munich Logistics and Services GmbH, Hallbergmoos                                   | 100                   |
| Alpha Verteilertechnik GmbH, Cham                                                          | 100 <sup>10</sup>     |
| Anlagen- und Rohrleitungsbau Ratingen GmbH, Ratingen                                       | 100 <sup>7</sup>      |
| applied international informatics GmbH, Berlin                                             | 100                   |
| Atecs Mannesmann GmbH, Düsseldorf                                                          | 100                   |
| Atecs Mannesmann Unterstützungskasse GmbH,<br>Mülheim an der Ruhr                          | 100 <sup>7</sup>      |
| Audio Service GmbH, Herford                                                                | 100                   |
| Berliner Vermögensverwaltung GmbH, Berlin                                                  | 100 <sup>10</sup>     |
| BWI Services GmbH, Meckenheim                                                              | 100 <sup>10</sup>     |
| CAPTA Grundstücksgesellschaft mbH & Co. KG, Grünwald                                       | 100 <sup>9</sup>      |
| CAPTA Grundstücks-Verwaltungsgesellschaft mbH, Grünwald                                    | 100                   |
| DA Creative GmbH, München                                                                  | 100                   |
| Dade Behring Beteiligungs GmbH, Eschborn                                                   | 100                   |
| Dade Behring Grundstücks GmbH, Marburg                                                     | 100                   |
| DPC Holding GmbH, Eschborn                                                                 | 100                   |
| Ecue Control GmbH, Paderborn                                                               | 100                   |
| EDI – USS Umsatzsteuersammelrechnungen und Signaturen<br>GmbH & Co. KG, München            | 100 <sup>9</sup>      |
| EDI – USS Verwaltungsgesellschaft mbH, München                                             | 100 <sup>7</sup>      |
| ELIN Energietechnik GmbH, Berlin                                                           | 100                   |
| energy4u GmbH, Karlsruhe                                                                   | 60                    |
| ETM Deutschland GmbH, Laatzen                                                              | 100                   |
| evosoft GmbH, Nürnberg                                                                     | 98 <sup>10</sup>      |
| FACTA Grundstücks-Entwicklungs- und Verwaltungs-<br>gesellschaft mbH, München              | 100 <sup>7</sup>      |
| FACTA Grundstücks-Entwicklungsgesellschaft<br>mbH & Co. KG, München                        | 100 <sup>9</sup>      |
| GHG Vermögensverwaltungs-GmbH & Co. KG i.L., Grünwald                                      | 100 <sup>7</sup>      |
| HanseCom Gesellschaft für Informations- und<br>Kommunikationsdienstleistungen mbH, Hamburg | 74                    |
| HSP Hochspannungsgeräte GmbH, Troisdorf                                                    | 100 <sup>10</sup>     |
| ILLIT Grundstücks-Verwaltungsgesellschaft mbH & Co. KG,<br>Grünwald                        | 100 <sup>9</sup>      |

- 1 Beherrschender Einfluss durch Stimmrechtsmehrheit.
- 2 Beherrschender Einfluss durch vertragliche Gestaltungen.
- 3 Beherrschender Einfluss durch wirtschaftliche Umstände.
- 4 Fehlender beherrschender Einfluss durch vertragliche Gestaltungen bzw. rechtliche Umstände.
- 5 Fehlender maßgeblicher Einfluss durch vertragliche Gestaltungen bzw. rechtliche Umstände.

| Stand 30.09.2010                                                                    | Kapitalanteil<br>in % |
|-------------------------------------------------------------------------------------|-----------------------|
| ILLIT Grundstücksverwaltungs-Management GmbH, Grünwald                              | 85                    |
| Immosuisse GmbH Immobilien Management i. L., Berlin                                 | 100                   |
| Industrieschutz Assekuranz-Vermittlung GmbH,<br>Mülheim a. d. Ruhr                  | 100                   |
| IPGD Grundstücksverwaltungs-Gesellschaft mbH, München                               | 100                   |
| itp Finanzservice Verwaltungsgesellschaft GmbH, Salzkotten                          | 100 <sup>7</sup>      |
| Jawa Power Holding GmbH, Erlangen                                                   | 100 <sup>10</sup>     |
| KompTime GmbH, München                                                              | 100 <sup>10</sup>     |
| Kyros 5 Beteiligungsgesellschaft mbH, München                                       | 100                   |
| Kyros 40 GmbH, München                                                              | 100                   |
| Kyros 2849 GmbH, München                                                            | 100 <sup>7</sup>      |
| Lincas Electro Vertriebsgesellschaft mbH, Hamburg                                   | 100                   |
| LINCAS Export Services GmbH, Hamburg                                                | 100 <sup>10</sup>     |
| Loher GmbH, Ruhstorf a.d. Rott                                                      | 100 <sup>10</sup>     |
| Mannesmann Demag Krauss-Maffei GmbH, München                                        | 100                   |
| Mechanik Center Erlangen GmbH, Erlangen                                             | 100                   |
| messMa GmbH, Irxleben                                                               | 100                   |
| OPTIO Grundstücks-Vermietungsgesellschaft mbH & Co.<br>Objekt Tübingen KG, Tübingen | 100 <sup>9</sup>      |
| OSRAM GmbH, München                                                                 | 100 <sup>10</sup>     |
| OSRAM Opto Semiconductors GmbH, Regensburg                                          | 100 <sup>10</sup>     |
| Partikeltherapiezentrum Kiel Holding GmbH, Erlangen                                 | 100 <sup>10</sup>     |
| Projektbau-Arena-Berlin GmbH, München                                               | 100                   |
| R & S Restaurant Services GmbH, München                                             | 100                   |
| Radium Lampenwerk Gesellschaft mbH, Wipperfürth                                     | 100 <sup>10</sup>     |
| REMECH Systemtechnik GmbH, Kamsdorf                                                 | 100                   |
| RISICOM Rückversicherung AG, Grünwald                                               | 100                   |
| Ruhrpilot Betriebsgesellschaft GmbH i. L., Essen                                    | 85                    |
| Ruhrtal Hochspannungsgeräte GmbH, Bochum                                            | 100 <sup>10</sup>     |
| SiCED Electronics Development GmbH & Co. KG, Erlangen                               | 51 <sup>9</sup>       |
| SiCED Electronics Development Verwaltungs-GmbH, Erlangen                            | 51 <sup>7</sup>       |
| Siemens Audiologische Technik GmbH, Erlangen                                        | 100                   |
| Siemens Beteiligungen Inland GmbH, München                                          | 100 <sup>10</sup>     |
| Siemens Beteiligungen Management GmbH, Grünwald                                     | 100 <sup>7</sup>      |
| Siemens Beteiligungen USA GmbH, München                                             | 100 <sup>10</sup>     |
| Siemens Beteiligungsverwaltung GmbH & Co. OHG, Grünwald                             | 100 <sup>9</sup>      |
| Siemens Building Technologies Holding GmbH, Grünwald                                | 100                   |
| Siemens Electronic Design and Manufacturing Management<br>GmbH, Erlangen            | 100 <sup>7</sup>      |
| Siemens Electronics Assembly Systems GmbH & Co. KG,<br>München                      | 100 <sup>9</sup>      |
| Siemens Electronics Assembly Systems Management GmbH,<br>München                    | 100 <sup>7</sup>      |

- 6 Maßgeblicher Einfluss durch vertragliche Gestaltungen bzw. rechtliche Umstände.
- 7 Verzicht auf die Einbeziehung in den Konzernabschluss wegen untergeordneter Bedeutung.
- 8 Verzicht auf die Equityfortschreibung wegen untergeordneter Bedeutung.
- 9 Befreiung gemäß § 264b HGB.
- 10 Befreiung gemäß § 264 Abs. 3 HGB.

| Stand 30.09.2010                                                                          | Kapitalanteil<br>in % |
|-------------------------------------------------------------------------------------------|-----------------------|
| Siemens Energy Automation GmbH, Erlangen                                                  | 100 <sup>10</sup>     |
| Siemens Finance & Leasing GmbH, München                                                   | 100 <sup>10</sup>     |
| Siemens Financial Services GmbH, München                                                  | 100 <sup>10</sup>     |
| Siemens Fuel Gasification Technology GmbH & Co. KG, Freiberg                              | 100 <sup>9</sup>      |
| Siemens Fuel Gasification Technology Verwaltungs GmbH,<br>Freiberg                        | 100 <sup>7</sup>      |
| Siemens Geared Motors Gesellschaft mit beschränkter<br>Haftung, Tübingen                  | 100 <sup>10</sup>     |
| Siemens Global Innovation Partners Management GmbH,<br>München                            | 100 <sup>7</sup>      |
| Siemens Gusstechnik GmbH, Chemnitz                                                        | 100 <sup>10</sup>     |
| Siemens Healthcare Diagnostics GmbH, Eschborn                                             | 100                   |
| Siemens Healthcare Diagnostics Holding GmbH, Eschborn                                     | 100                   |
| Siemens Healthcare Diagnostics Products GmbH, Marburg                                     | 100                   |
| Siemens Immobilien Chemnitz-Voerde GmbH, Grünwald                                         | 100 <sup>10</sup>     |
| Siemens Industrial Turbomachinery GmbH, Duisburg                                          | 100 <sup>10</sup>     |
| Siemens Industriegetriebe GmbH, Penig                                                     | 100 <sup>10</sup>     |
| Siemens Industriepark Karlsruhe GmbH & Co. KG, Grünwald                                   | 100 <sup>9</sup>      |
| Siemens Industry Software GmbH & Co. KG, Schwelm                                          | 100 <sup>9</sup>      |
| Siemens Industry Software Management GmbH, Schwelm                                        | 100                   |
| Siemens IT Dienstleistung und Beratung GmbH, Gelsenkirchen                                | 100 <sup>10</sup>     |
| Siemens IT Solutions and Services GmbH, München                                           | 100                   |
| Siemens IT Solutions and Services Management GmbH, München                                | 100                   |
| Siemens IT Solutions and Services Verwaltungs-GmbH, München                               | 100                   |
| Siemens Kapitalanlagegesellschaft mbH, München                                            | 100 <sup>10</sup>     |
| Siemens Medical Solutions Health Services GmbH, Erlangen                                  | 100                   |
| Siemens Nixdorf Informationssysteme GmbH, Grünwald                                        | 100                   |
| Siemens Power Control GmbH, Langen                                                        | 100 <sup>10</sup>     |
| Siemens Private Finance Versicherungs- und Kapitalanlagen-<br>vermittlungsg-GmbH, München | 100 <sup>10</sup>     |
| Siemens Programm- und Systementwicklung GmbH, Hamburg                                     | 100 <sup>7</sup>      |
| Siemens Programm- und Systementwicklung GmbH & Co. KG,<br>Hamburg                         | 100 <sup>9</sup>      |
| Siemens Project Ventures GmbH, Erlangen                                                   | 100 <sup>10</sup>     |
| Siemens Real Estate GmbH & Co. OHG, Grünwald                                              | 100 <sup>9</sup>      |
| Siemens Real Estate Management GmbH, Grünwald                                             | 100 <sup>7</sup>      |
| Siemens Spezial-Investmentaktiengesellschaft mit TGV,<br>Frankfurt am Main                | 100                   |
| Siemens Technology Accelerator GmbH, München                                              | 100 <sup>10</sup>     |
| Siemens Technopark Berlin GmbH & Co. KG, Berlin                                           | 100 <sup>9</sup>      |
| Siemens Technopark Berlin Verwaltungs GmbH, Berlin                                        | 100 <sup>7</sup>      |
| Siemens Technopark Mülheim GmbH & Co. KG,<br>Mülheim a. d. Ruhr                           | 100 <sup>9</sup>      |

| Stand 30.09.2010                                                                           | Kapitalanteil<br>in % |
|--------------------------------------------------------------------------------------------|-----------------------|
| Siemens Technopark Mülheim Verwaltungs-GmbH,<br>Mülheim a. d. Ruhr                         | 100 <sup>7</sup>      |
| Siemens Technopark Nürnberg GmbH & Co. KG, Nürnberg                                        | 100 <sup>9</sup>      |
| Siemens Technopark Nürnberg Verwaltungs GmbH, Nürnberg                                     | 100 <sup>7</sup>      |
| Siemens Treasury GmbH, München                                                             | 100 <sup>10</sup>     |
| Siemens Turbomachinery Equipment GmbH, Frankenthal                                         | 100 <sup>10</sup>     |
| Siemens VAI Metals Technologies GmbH, Willstätt-Legeshurst                                 | 100                   |
| Siemens Venture Capital Energy GmbH, München                                               | 100 <sup>10</sup>     |
| Siemens Venture Capital GmbH, München                                                      | 100 <sup>10</sup>     |
| Siemens Venture Capital Healthcare GmbH, München                                           | 100 <sup>10</sup>     |
| Siemens Venture Capital Industry GmbH, München                                             | 100 <sup>10</sup>     |
| Siemens Wind Power GmbH, Bremen                                                            | 100                   |
| SILLIT Grundstücks-Verwaltungsgesellschaft mbH, München                                    | 100                   |
| SIM 2. Grundstücks-GmbH & Co. KG i. L., München                                            | 100 <sup>9</sup>      |
| SIM 16. Grundstücksverwaltungs- und -beteiligungs-<br>GmbH & Co. KG, München               | 100                   |
| SIMAR Nordost Grundstücks-GmbH, München                                                    | 100                   |
| SIMAR Nordwest Grundstücks-GmbH, München                                                   | 100                   |
| SIMAR Ost Grundstücks-GmbH, München                                                        | 100                   |
| SIMAR Süd Grundstücks-GmbH, München                                                        | 100                   |
| SIMAR West Grundstücks-GmbH, München                                                       | 100                   |
| SIMOS Real Estate GmbH, München                                                            | 100                   |
| sinius GmbH, München                                                                       | 100 <sup>10</sup>     |
| SKAG Fonds S7, München                                                                     | 100                   |
| SKAG Fonds S8, München                                                                     | 100                   |
| SKAG Principals, München                                                                   | 100                   |
| Steinmüller Engineering GmbH, Gummersbach                                                  | 60                    |
| SVM Star Ventures Managementgesellschaft<br>mbH Nr. 3 & Co. Beteiligungs KG, München       | 99 <sup>3</sup>       |
| SVM Star Ventures Managementgesellschaft<br>mbH Nr. 3 & Co. Beteiligungs KG Nr. 2, München | 99 <sup>3</sup>       |
| SVM Star Ventures Managementgesellschaft<br>mbH Nr. 3 & Co. Beteiligungs KG Nr. 3, München | 99 <sup>3</sup>       |
| SVM Star Ventures Managementgesellschaft<br>mbH Nr. 3 & Co. Beteiligungs KG Nr. 4, München | 99 <sup>3</sup>       |
| SYKATEC Systeme, Komponenten, Anwendungstechnologie<br>GmbH, Erlangen                      | 100 <sup>10</sup>     |
| TGB Technisches Gemeinschaftsbüro GmbH, Kassel                                             | 100                   |
| TLT-Turbo GmbH, Zweibrücken                                                                | 100 <sup>10</sup>     |
| Trench Germany GmbH, Bamberg                                                               | 100 <sup>10</sup>     |
| Turbine Airfoil Coating and Repair GmbH, Berlin                                            | 100 <sup>3</sup>      |
| Vermietungsgesellschaft Objekt 12 GmbH & Co.<br>Objekt München KG i. L., Düsseldorf        | 95 <sup>9</sup>       |

- 1 Beherrschender Einfluss durch Stimmrechtsmehrheit.
- 2 Beherrschender Einfluss durch vertragliche Gestaltungen.
- 3 Beherrschender Einfluss durch wirtschaftliche Umstände.
- 4 Fehlender beherrschender Einfluss durch vertragliche Gestaltungen bzw. rechtliche Umstände.
- 5 Fehlender maßgeblicher Einfluss durch vertragliche Gestaltungen bzw. rechtliche Umstände.

- 6 Maßgeblicher Einfluss durch vertragliche Gestaltungen bzw. rechtliche Umstände.
- 7 Verzicht auf die Einbeziehung in den Konzernabschluss wegen untergeordneter Bedeutung.
- 8 Verzicht auf die Equityfortschreibung wegen untergeordneter Bedeutung.
- 9 Befreiung gemäß § 264b HGB.
- 10 Befreiung gemäß § 264 Abs. 3 HGB.

| Stand 30.09.2010                                                                          | Kapitalanteil<br>in % |
|-------------------------------------------------------------------------------------------|-----------------------|
| Vertacross Verwaltungsgesellschaft mbH i.L., Nürnberg                                     | 100 <sup>7</sup>      |
| Verwaltung Poolbeg Vermiet GmbH, München                                                  | 100 <sup>7</sup>      |
| VIB Verkehrsinformationsagentur Bayern GmbH, München                                      | 51                    |
| VMZ Berlin Betreiber-Gesellschaft mbH, Berlin                                             | 100                   |
| VR-LEASING IKANA GmbH & Co. Immobilien KG, Eschborn                                       | 94 <sup>3</sup>       |
| VVK Versicherungsvermittlungs- und Verkehrskontor GmbH, München                           | 100 <sup>10</sup>     |
| Wallace & Tiernan GmbH, Günzburg                                                          | 100                   |
| Weiss Spindeltechnologie GmbH, Schweinfurt                                                | 100                   |
| Wesmag Wesler Maschinenbau GmbH, Wesel                                                    | 100 <sup>10</sup>     |
| Winergy AG, Voerde                                                                        | 100 <sup>10</sup>     |
| WIVERTIS Gesellschaft für Informations- und Kommunikationsdienstleistungen mbH, Wiesbaden | 50 <sup>1</sup>       |
| <b>Europa (ohne Deutschland) (292 Gesellschaften)</b>                                     |                       |
| Oktopus S.A./N.V., Brüssel/Belgien                                                        | 100                   |
| SDRC Belgium N.V./S.A., Brüssel/Belgien                                                   | 100                   |
| Siemens Healthcare Diagnostics SA, Brüssel/Belgien                                        | 100                   |
| Siemens Healthcare Diagnostics Services Sprl, Brüssel/Belgien                             | 100                   |
| Siemens IT Solutions and Services S.A., Anderlecht/Belgien                                | 100                   |
| Siemens Product Lifecycle Management Software (BE) NV, Zaventem/Belgien                   | 100                   |
| Siemens Product Lifecycle Management Software II (BE) BVBA, Zaventem/Belgien              | 100                   |
| Siemens S.A./N.V., Anderlecht/Belgien                                                     | 100                   |
| OSRAM d.o.o., Mostar/Bosnien und Herzegowina                                              | 100                   |
| Siemens d.o.o., Banja Luka/Bosnien und Herzegowina                                        | 100                   |
| Siemens d.o.o. Sarajevo, Sarajevo/Bosnien und Herzegowina                                 | 100                   |
| OSRAM EOOD, Sofia/Bulgarien                                                               | 100                   |
| Security Management Technologies Bulgaria EOOD, Sofia/Bulgarien                           | 100                   |
| Siemens EOOD, Sofia/Bulgarien                                                             | 100                   |
| Siemens IT Solutions and Services EOOD, Sofia/Bulgarien                                   | 100                   |
| Bewator Antech A/S, Ballerup/Dänemark                                                     | 100 <sup>7</sup>      |
| OSRAM A/S, Taastrup/Dänemark                                                              | 100                   |
| Siemens A/S, Ballerup/Dänemark                                                            | 100                   |
| Siemens Healthcare Diagnostics ApS, Ballerup/Dänemark                                     | 100                   |
| Siemens Höreapparater A/S, Kopenhagen/Dänemark                                            | 100                   |
| Siemens Industry Software A/S, Allerød, Allerød/Dänemark                                  | 100                   |
| Siemens IT Solutions and Services A/S, Taastrup/Dänemark                                  | 100                   |
| Siemens Turbomachinery Equipment A/S, Helsingør/Dänemark                                  | 100                   |
| Siemens Wind Power A/S, Brande/Dänemark                                                   | 100                   |

| Stand 30.09.2010                                                                       | Kapitalanteil<br>in % |
|----------------------------------------------------------------------------------------|-----------------------|
| Osäuhing Siemens Medical Solutions Diagnostics, Tallinn/Estland                        | 100                   |
| OY OSRAM AB, Vantaa/Finnland                                                           | 100                   |
| Siemens Healthcare Diagnostics OY, Espoo/Finnland                                      | 100                   |
| Siemens IT Solutions and Services Oy, Espoo/Finnland                                   | 100                   |
| Siemens Osakeyhtiö, Espoo/Finnland                                                     | 100                   |
| ELAN SOFTWARE SYSTEMS, Toulouse/Frankreich                                             | 100                   |
| Flender-Graffenstaden SAS, Illkirch-Graffenstaden/Frankreich                           | 100                   |
| OSRAM S.A.S.U., Molsheim/Frankreich                                                    | 100                   |
| PETNET Solutions SAS, Saint-Denis/Frankreich                                           | 100                   |
| Siemens Audiologie S.A., Saint-Denis/Frankreich                                        | 100                   |
| Siemens Electronics Assembly Systems SAS, Bussy-Saint-Georges/Frankreich               | 100                   |
| Siemens Financial Services SAS, Saint-Denis/Frankreich                                 | 100                   |
| Siemens France Holding S.A.S., Saint-Denis/Frankreich                                  | 100                   |
| Siemens Health Services France S.A.S., Bidart/Frankreich                               | 100                   |
| Siemens Healthcare Diagnostics S.A.S., Paris/Frankreich                                | 100                   |
| Siemens IT Solutions and Services France SAS, Bobigny/Frankreich                       | 100                   |
| Siemens Lease Services SAS, Saint-Denis/Frankreich                                     | 100                   |
| Siemens Product Lifecycle Management Software (FR) SAS, Vélizy Villacoublay/Frankreich | 100                   |
| Siemens S.A.S., Saint-Denis/Frankreich                                                 | 100                   |
| Siemens Transmission & Distribution SAS, Grenoble/Frankreich                           | 100                   |
| Siemens VAI Metals Technologies SAS, Saint Chamond/Frankreich                          | 100                   |
| Trench France S.A.S., Saint Louis/Frankreich                                           | 100                   |
| Tecnomatix Technologies (Gibraltar) Limited, Gibraltar/Gibraltar                       | 100                   |
| Kintec A.E., Athen/Griechenland                                                        | 100                   |
| OSRAM A.E., Athen/Griechenland                                                         | 100                   |
| Project Management Company A.E., Athen/Griechenland                                    | 51                    |
| Siemens A.E., Elektrotechnische Projekte und Erzeugnisse, Athen/Griechenland           | 100                   |
| Siemens Healthcare Diagnostics ABEE, Iraklio Attikis/Griechenland                      | 100                   |
| Broadcastle Bank Limited, Stoke Poges, Buckinghamshire/Großbritannien                  | 100                   |
| Broadcastle Ltd., Stoke Poges, Buckinghamshire/Großbritannien                          | 100                   |
| Electrium Sales Limited, Frimley Surrey/Großbritannien                                 | 100                   |
| Europlex Technologies UK Limited, Bedford, Bedfordshire/Großbritannien                 | 100                   |
| GyM Renewables Limited, Frimley, Camberley/Großbritannien                              | 100                   |

- 1 Beherrschender Einfluss durch Stimmrechtsmehrheit.
- 2 Beherrschender Einfluss durch vertragliche Gestaltungen.
- 3 Beherrschender Einfluss durch wirtschaftliche Umstände.
- 4 Fehlender beherrschender Einfluss durch vertragliche Gestaltungen bzw. rechtliche Umstände.
- 5 Fehlender maßgeblicher Einfluss durch vertragliche Gestaltungen bzw. rechtliche Umstände.

- 6 Maßgeblicher Einfluss durch vertragliche Gestaltungen bzw. rechtliche Umstände.
- 7 Verzicht auf die Einbeziehung in den Konzernabschluss wegen untergeordneter Bedeutung.
- 8 Verzicht auf die Equityfortschreibung wegen untergeordneter Bedeutung.
- 9 Befreiung gemäß § 264b HGB.
- 10 Befreiung gemäß § 264 Abs. 3 HGB.

| Stand 30.09.2010                                                                               | Kapitalanteil<br>in % |
|------------------------------------------------------------------------------------------------|-----------------------|
| GyM Renewables ONE Limited, Frimley,<br>Camberley/Großbritannien                               | 100                   |
| OSRAM Ltd., Langley, Berkshire/Großbritannien                                                  | 100                   |
| Siemens Electronics Assembly Systems Ltd,<br>Frimley/Großbritannien                            | 100                   |
| Siemens Financial Services Holdings Ltd.,<br>Stoke Poges, Buckinghamshire/Großbritannien       | 100                   |
| Siemens Financial Services Ltd.,<br>Stoke Poges, Buckinghamshire/Großbritannien                | 100                   |
| Siemens Flow Instruments Ltd.,<br>Stonehouse, Gloucestershire/Großbritannien                   | 100                   |
| Siemens Healthcare Diagnostics Ltd.,<br>Camberley/Großbritannien                               | 100                   |
| Siemens Healthcare Diagnostics Manufacturing Ltd,<br>Frimley, Surrey/Großbritannien            | 100                   |
| Siemens Healthcare Diagnostics Products Ltd,<br>Llanberis, Gwynedd/Großbritannien              | 100                   |
| Siemens Hearing Instruments Ltd.,<br>Crawley, Sussex/Großbritannien                            | 100                   |
| Siemens Holdings plc, Frimley, Surrey/Großbritannien                                           | 100                   |
| Siemens Industrial Turbomachinery Ltd.,<br>Lincoln, Lincolnshire/Großbritannien                | 100                   |
| Siemens Industry Software Limited,<br>Camberley, Surrey/Großbritannien                         | 100                   |
| Siemens IT Solutions and Services Ltd.,<br>Camberley, Surrey/Großbritannien                    | 100                   |
| Siemens plc, Frimley, Surrey/Großbritannien                                                    | 100                   |
| Siemens Product Lifecycle Management Software II (GB) Ltd,<br>Camberley, Surrey/Großbritannien | 100                   |
| Siemens Protection Devices Limited,<br>Frimley, Surrey/Großbritannien                          | 100                   |
| Siemens Real Estate Ltd., Frimley, Surrey/Großbritannien                                       | 100                   |
| Siemens Transmission & Distribution Limited,<br>Frimley, Surrey/Großbritannien                 | 100                   |
| Siemens VAI Metals Technologies Limited,<br>Sheffield, South Yorkshire/Großbritannien          | 100                   |
| Trench (UK) Ltd., Hebburn, Tyne and Wear/Großbritannien                                        | 100                   |
| VA TECH (UK) Ltd., Frimley, Surrey/Großbritannien                                              | 100                   |
| VA TECH Reyrolle (Overseas Projects) Ltd.,<br>Frimley, Surrey/Großbritannien                   | 100                   |
| VA Tech Reyrolle Distribution Ltd.,<br>Frimley, Surrey/Großbritannien                          | 100                   |
| VA TECH T & D UK Ltd., Frimley, Surrey/Großbritannien                                          | 100                   |

| Stand 30.09.2010                                                       | Kapitalanteil<br>in % |
|------------------------------------------------------------------------|-----------------------|
| VTW Anlagen UK Ltd., Banbury, Oxfordshire/Großbritannien               | 100                   |
| Bonus Wind Turbine Ireland Limited, Dublin/Irland                      | 100                   |
| Europlex Technologies (Ireland) Limited, Dublin/Irland                 | 100                   |
| iMetrex Technologies Limited, Dublin/Irland                            | 100                   |
| Siemens IT Solutions and Services Ltd, Dublin/Irland                   | 100                   |
| Siemens Ltd., Dublin/Irland                                            | 100                   |
| Siemens Medical Solutions Diagnostics Europe Limited,<br>Dublin/Irland | 100                   |
| SIIC International Limited, Dublin/Irland                              | 100                   |
| UGS Holdings (Central Europe) Limited, Dublin/Irland                   | 100                   |
| UGS Holdings (Europe) Limited, Dublin/Irland                           | 100                   |
| HV-Turbo Italia S.r.l., Mornago/Italien                                | 51                    |
| Nuova Magrini Galileo S.p.A. in Liquidazione, Bergamo/Italien          | 100                   |
| OSRAM S.p.A. Società Riunite OSRAM-Edison-Clerici,<br>Mailand/Italien  | 100                   |
| Siemens Electronics Assembly Sytems S.r.l., Mailand/Italien            | 100                   |
| Siemens Finanziaria S.p.A. in Liquidazione, Mailand/Italien            | 100                   |
| Siemens Healthcare Diagnostics S.r.l., Mailand/Italien                 | 100                   |
| Siemens Hearing Instruments Italy S.r.l., Mailand/Italien              | 100                   |
| Siemens Holding S.p.A., Mailand/Italien                                | 100                   |
| Siemens Industry Software S.r.l, Mailand/Italien                       | 100                   |
| Siemens IT Solutions and Services S.p.A., Mailand/Italien              | 100                   |
| Siemens Renting S.p.A. in Liquidazione, Mailand/Italien                | 100                   |
| Siemens S.p.A., Mailand/Italien                                        | 100                   |
| Siemens Transformers S.p.A., Trento/Italien                            | 100                   |
| Siemens VAI Metals Technologies S.r.l., Marnate/Italien                | 100                   |
| Trench Italia S.r.l., Savona/Italien                                   | 100                   |
| TurboCare S.p.A., Turin/Italien                                        | 100                   |
| DPC d.o.o. »u likvidaciji« Zagreb, Zagreb/Kroatien                     | 100 <sup>7</sup>      |
| Koncar Power Transformers Ltd., Zagreb/Kroatien                        | 51                    |
| OSRAM d.o.o., Zagreb/Kroatien                                          | 100                   |
| Siemens d.d., Zagreb/Kroatien                                          | 98                    |
| Siemens IT Solutions and Services d.o.o., Zagreb/Kroatien              | 100                   |
| SIA Siemens Medical Solutions Diagnostics, Riga/Lettland               | 100                   |
| UAB Siemens Medical Solutions Diagnostics, Vilnius/Litauen             | 100                   |
| Siemens IT Solutions and Services Finance SA,<br>Luxemburg/Luxemburg   | 100                   |
| Tecnomatix Technologies SARL, Luxemburg/Luxemburg                      | 100                   |
| TFM International S.A. i. L., Luxemburg/Luxemburg                      | 100                   |
| Siemens S.r.l., Chisinau/Moldawien                                     | 100 <sup>7</sup>      |
| Siemens d.o.o. Podgorica, Podgorica/Montenegro                         | 100                   |
| OSRAM Benelux B.V., Capelle a/d IJssel/Niederlande                     | 100                   |
| Siemens Audiologie Technik B.V., Den Haag/Niederlande                  | 100                   |

- 1 Beherrschender Einfluss durch Stimmrechtsmehrheit.
- 2 Beherrschender Einfluss durch vertragliche Gestaltungen.
- 3 Beherrschender Einfluss durch wirtschaftliche Umstände.
- 4 Fehlender beherrschender Einfluss durch vertragliche Gestaltungen bzw. rechtliche Umstände.
- 5 Fehlender maßgeblicher Einfluss durch vertragliche Gestaltungen bzw. rechtliche Umstände.

- 6 Maßgeblicher Einfluss durch vertragliche Gestaltungen bzw. rechtliche Umstände.
- 7 Verzicht auf die Einbeziehung in den Konzernabschluss wegen untergeordneter Bedeutung.
- 8 Verzicht auf die Equityfortschreibung wegen untergeordneter Bedeutung.
- 9 Befreiung gemäß § 264b HGB.
- 10 Befreiung gemäß § 264 Abs. 3 HGB.

| Stand 30.09.2010                                                            | Kapitalanteil<br>in % |
|-----------------------------------------------------------------------------|-----------------------|
| Siemens Building Technologies Holding B.V., Zoetermeer /Niederlande         | 100                   |
| Siemens Diagnostics Holding II B.V., Den Haag /Niederlande                  | 100                   |
| Siemens Finance B.V., Den Haag /Niederlande                                 | 100                   |
| Siemens Financieringsmaatschappij N.V., Den Haag /Niederlande               | 100                   |
| Siemens Healthcare Diagnostics B.V., Breda /Niederlande                     | 100                   |
| Siemens Industrial Turbomachinery B.V., Hengelo /Niederlande                | 100                   |
| Siemens Industry Software B.V., Capelle aan den IJssel /Niederlande         | 100                   |
| Siemens International Holding B.V., Den Haag /Niederlande                   | 100                   |
| Siemens IT Solution and Services B.V., Den Haag /Niederlande                | 100                   |
| Siemens Lease B.V., Den Haag /Niederlande                                   | 100                   |
| Siemens Medical Solutions Diagnostics Holding I B.V., Den Haag /Niederlande | 100                   |
| Siemens Nederland N.V., Den Haag /Niederlande                               | 100                   |
| Traxon Technologies EU B.V., Barendrecht /Niederlande                       | 100                   |
| TurboCare B.V., Hengelo /Niederlande                                        | 100                   |
| OSRAM AS, Baerum /Norwegen                                                  | 100                   |
| Siemens AS, Oslo /Norwegen                                                  | 100                   |
| Siemens Business Services AS, Oslo /Norwegen                                | 100                   |
| Siemens Healthcare Diagnostics AS, Oslo /Norwegen                           | 100                   |
| Siemens Höreapparater AS, Lillestrom /Norwegen                              | 100                   |
| addIT Dienstleistungen GmbH & Co KG, Klagenfurt /Österreich                 | 100                   |
| addIT Dienstleistungs GmbH, Klagenfurt /Österreich                          | 100 <sup>7</sup>      |
| Arbeitsmarktservice BetriebsgmbH, Wien /Österreich                          | 60 <sup>3</sup>       |
| Arbeitsmarktservice BetriebsgmbH & Co KG, Wien /Österreich                  | 60 <sup>3</sup>       |
| ComBuild Kommunikations & Gebäudetechnologie GmbH, Wien /Österreich         | 100                   |
| ELIN EBG Traction GmbH, Wien /Österreich                                    | 100                   |
| ETM professional control GmbH, Eisenstadt /Österreich                       | 100                   |
| FSG Financial Services GmbH, Wien /Österreich                               | 100                   |
| Hochquellstrom-Vertriebs GmbH, Wien /Österreich                             | 100                   |
| Innovest 2007, Wien /Österreich                                             | 100                   |
| INNOVEST Kapitalanlage AG, Wien /Österreich                                 | 100                   |
| ITH icoserve technology for healthcare GmbH, Innsbruck /Österreich          | 69                    |
| KDAG Beteiligungen GmbH, Wien /Österreich                                   | 100                   |
| Landis & Staefa (Österreich) GmbH, Wien /Österreich                         | 100                   |
| Landis & Staefa GmbH, Wien /Österreich                                      | 100                   |
| OSRAM GmbH, Wien /Österreich                                                | 100                   |
| Saudi VOEST-ALPINE GmbH, Linz /Österreich                                   | 100                   |
| SIELOG Systemlogik GmbH, Wien /Österreich                                   | 76                    |

| Stand 30.09.2010                                                                   | Kapitalanteil<br>in % |
|------------------------------------------------------------------------------------|-----------------------|
| Siemens Aktiengesellschaft Österreich, Wien /Österreich                            | 100                   |
| Siemens Electronics Assembly Systems GmbH, Wien /Österreich                        | 100 <sup>7</sup>      |
| Siemens Electronics Assembly Systems GmbH & Co KG, Wien /Österreich                | 100                   |
| Siemens Gebäudemanagement & -Services G.m.b.H., Wien /Österreich                   | 100                   |
| Siemens Healthcare Diagnostics GmbH, Wien /Österreich                              | 100                   |
| Siemens Industry Software GmbH, Klagenfurt /Österreich                             | 100                   |
| Siemens Konzernbeteiligungen GmbH, Wien /Österreich                                | 100                   |
| Siemens Liegenschaftsverwaltung GmbH, Wien /Österreich                             | 100                   |
| Siemens Mitarbeitervorsorgekasse AG, Wien /Österreich                              | 100                   |
| Siemens Pensionskasse AG, Wien /Österreich                                         | 100                   |
| Siemens Personaldienstleistungen GmbH, Wien /Österreich                            | 100                   |
| Siemens Personaldienstleistungen GmbH & Co KG, Wien /Österreich                    | 100                   |
| Siemens Product Lifecycle Management Software (AT) GmbH in Liqu., Linz /Österreich | 100                   |
| Siemens Transformers Austria GmbH, Wien /Österreich                                | 100                   |
| Siemens Transformers Austria GmbH & Co KG, Wien /Österreich                        | 100                   |
| Siemens VAI Metals Technologies GmbH, Linz /Österreich                             | 100                   |
| Steiermärkische Medizinarchiv GesmbH, Graz /Österreich                             | 52                    |
| Trench Austria GmbH, Leonding /Österreich                                          | 100                   |
| TSG EDV-Terminal-Service Ges.m.b.H., Wien /Österreich                              | 99                    |
| unit-IT Dienstleistungs GmbH, Linz /Österreich                                     | 75 <sup>7</sup>       |
| unit-IT Dienstleistungs GmbH & Co KG, Linz /Österreich                             | 75                    |
| VA TECH Vermögensverwaltung AG in Liqu., Linz /Österreich                          | 92                    |
| VVK Versicherungs-Vermittlungs- und Verkehrs-Kontor GmbH, Wien /Österreich         | 100                   |
| Audio SAT Sp. z o.o., Poznan /Polen                                                | 100                   |
| DPC Polska Sp. z o.o., Krakau /Polen                                               | 100                   |
| OSRAM Sp. z o.o., Warschau /Polen                                                  | 100                   |
| Siemens Finance Sp. z o.o., Warschau /Polen                                        | 100                   |
| Siemens Healthcare Diagnostics Sp. z o.o., Warschau /Polen                         | 100                   |
| Siemens IT Solutions and Services Sp. z o.o., Warschau /Polen                      | 100                   |
| Siemens Product Lifecycle Management Software (PL) Sp. z.o.o., Warschau /Polen     | 100                   |
| Siemens Sp. z o.o., Warschau /Polen                                                | 100                   |
| TurboCare Poland Spółka Akcyjna, Lubliniec /Polen                                  | 100                   |
| TurboCare Sp. z o.o., Breslau /Polen                                               | 80                    |
| OSRAM Empresa de Aparelhagem Eléctrica Lda., Lissabon /Portugal                    | 100                   |
| Siemens Healthcare Diagnostics, Unipessoal Lda., Amadora /Portugal                 | 100                   |

- 1 Beherrschender Einfluss durch Stimmrechtsmehrheit.
- 2 Beherrschender Einfluss durch vertragliche Gestaltungen.
- 3 Beherrschender Einfluss durch wirtschaftliche Umstände.
- 4 Fehlender beherrschender Einfluss durch vertragliche Gestaltungen bzw. rechtliche Umstände.
- 5 Fehlender maßgeblicher Einfluss durch vertragliche Gestaltungen bzw. rechtliche Umstände.

- 6 Maßgeblicher Einfluss durch vertragliche Gestaltungen bzw. rechtliche Umstände.
- 7 Verzicht auf die Einbeziehung in den Konzernabschluss wegen untergeordneter Bedeutung.
- 8 Verzicht auf die Equityfortschreibung wegen untergeordneter Bedeutung.
- 9 Befreiung gemäß § 264b HGB.
- 10 Befreiung gemäß § 264 Abs. 3 HGB.

| Stand 30.09.2010                                                                 | Kapitalanteil<br>in % |
|----------------------------------------------------------------------------------|-----------------------|
| Siemens IT Solutions and Services, Unipessoal, Lda, Amadora /Portugal            | 100                   |
| Siemens S.A., Amadora /Portugal                                                  | 100                   |
| OSRAM Romania S.R.L., Bukarest/Rumänien                                          | 100                   |
| SIEMENS (AUSTRIA) PROIECT SPITAL COLTEA SRL, Bukarest/Rumänien                   | 100                   |
| Siemens IT Solutions and Services s.r.l., Bukarest/Rumänien                      | 100 <sup>7</sup>      |
| Siemens Program and System Engineering S.R.L., Brasov/Rumänien                   | 100                   |
| Siemens S.R.L., Bukarest/Rumänien                                                | 100                   |
| SIMEA SIBIU S.R.L., Sibiu/Rumänien                                               | 100                   |
| OOO OSRAM, Smolensk/Russische Föderation                                         | 100                   |
| OOO Legion II, Moskau, Moskau/Russische Föderation                               | 100                   |
| OOO Legion T2, Moskau, Moskau/Russische Föderation                               | 100                   |
| OOO OEZ-R, Moskau/Russische Föderation                                           | 100                   |
| OOO Russian Turbo Machinery, Perm, Perm/Russische Föderation                     | 51                    |
| OOO Siemens, Moskau/Russische Föderation                                         | 100                   |
| OOO Siemens Elektroprivod, St. Petersburg/Russische Föderation                   | 66                    |
| OOO Siemens Elektrozavod High-voltage Engineering, Moskau/Russische Föderation   | 51                    |
| OOO Siemens High Voltage Products, Ufimsker Region/Russische Föderation          | 100                   |
| OOO Siemens Management Infrastruktury y Imuschestwa, Moskau/Russische Föderation | 100                   |
| OOO Siemens Transformers, Voronezh/Russische Föderation                          | 100                   |
| Siemens Product Lifecycle Management Software (RU), Moskau/Russische Föderation  | 100                   |
| OSRAM AB, Stockholm/Schweden                                                     | 100                   |
| Siemens AB, Upplands Väsby/Schweden                                              | 100                   |
| Siemens Electronics Assembly Systems AB, Stockholm/Schweden                      | 100                   |
| Siemens Financial Services AB, Stockholm/Schweden                                | 100                   |
| Siemens Healthcare Diagnostics AB, Södertälje/Schweden                           | 100                   |
| Siemens Industrial Turbomachinery AB, Finspong/Schweden                          | 100                   |
| Siemens Industry Software AB, Kista/Schweden                                     | 100                   |
| Siemens IT Solutions and Services AB, Upplands Väsby/Schweden                    | 100                   |
| Tecnomatix Technologies Sweden AB, Kista/Schweden                                | 100                   |
| Dade Behring Diagnostics AG, Düringen/Schweiz                                    | 100                   |
| Huba Control AG, Würenlos/Schweiz                                                | 100                   |

| Stand 30.09.2010                                                            | Kapitalanteil<br>in % |
|-----------------------------------------------------------------------------|-----------------------|
| Intercom Telecommunication System AG in Liquidation, Bäch/Schweiz           | 100 <sup>7</sup>      |
| OSRAM AG, Winterthur/Schweiz                                                | 100                   |
| Siemens Audiologie AG, Adliswil/Schweiz                                     | 100                   |
| Siemens Fuel Gasification Technology Holding AG, Zug/Schweiz                | 100                   |
| Siemens Healthcare Diagnostics AG, Zürich/Schweiz                           | 100                   |
| Siemens Industry Software AG, Urdorf/Schweiz                                | 100                   |
| Siemens IT Solutions and Services AG, Zürich/Schweiz                        | 100                   |
| Siemens Leasing AG, Zürich/Schweiz                                          | 100                   |
| Siemens Power Holding AG, Zug/Schweiz                                       | 100                   |
| Siemens Schweiz AG, Zürich/Schweiz                                          | 100                   |
| Stadt/Land Immobilien AG, Zürich/Schweiz                                    | 100                   |
| Trench Switzerland AG, Basel/Schweiz                                        | 100                   |
| OSRAM d.o.o., Belgrad/Serbien                                               | 100                   |
| Siemens d.o.o. Beograd, Belgrad/Serbien                                     | 100                   |
| Siemens IT Solutions and Services d.o.o., Belgrad/Serbien                   | 100                   |
| OEZ Slovakia, spol. s r.o., Bratislava/Slowakei                             | 100                   |
| OSRAM Slovakia a.s., Nové Zámky/Slowakei                                    | 100                   |
| SAT Systémy automatizacnej techniky spol. s.r.o., Bratislava/Slowakei       | 60                    |
| Siemens IT Solutions and Services s.r.o., Bratislava/Slowakei               | 100 <sup>7</sup>      |
| Siemens Medical Solutions Diagnostics, s.r.o. i. L., Bratislava/Slowakei    | 100                   |
| Siemens Program and System Engineering s.r.o., Bratislava/Slowakei          | 100                   |
| Siemens s.r.o., Bratislava/Slowakei                                         | 100                   |
| SIPRIN s.r.o., Bratislava/Slowakei                                          | 100                   |
| Siemens d.o.o., Ljubljana/Slowenien                                         | 100                   |
| Dade Behring Iberica Holding, S.L., Barcelona/Spanien                       | 100                   |
| Fábrica Electrotécnica Josa, S.A., Barcelona/Spanien                        | 100                   |
| OSRAM S.A., Madrid/Spanien                                                  | 100                   |
| Petnet Soluciones, S.L., Sociedad Unipersonal, Madrid/Spanien               | 100                   |
| Siemens Fire & Security Products, S.A., Madrid/Spanien                      | 100                   |
| Siemens Healthcare Diagnostics S.L., Barcelona/Spanien                      | 100                   |
| Siemens Holding S.L., Madrid/Spanien                                        | 100                   |
| Siemens IT Solutions and Services Holding, S.L., Madrid/Spanien             | 100                   |
| Siemens IT Solutions and Services, S.L., Madrid/Spanien                     | 100                   |
| Siemens Product Lifecycle Management Software (ES), S.L., Barcelona/Spanien | 100                   |
| Siemens Renting S.A., Madrid/Spanien                                        | 100                   |
| Siemens S.A., Madrid/Spanien                                                | 100                   |

- 1 Beherrschender Einfluss durch Stimmrechtsmehrheit.
- 2 Beherrschender Einfluss durch vertragliche Gestaltungen.
- 3 Beherrschender Einfluss durch wirtschaftliche Umstände.
- 4 Fehlender beherrschender Einfluss durch vertragliche Gestaltungen bzw. rechtliche Umstände.
- 5 Fehlender maßgeblicher Einfluss durch vertragliche Gestaltungen bzw. rechtliche Umstände.

- 6 Maßgeblicher Einfluss durch vertragliche Gestaltungen bzw. rechtliche Umstände.
- 7 Verzicht auf die Einbeziehung in den Konzernabschluss wegen untergeordneter Bedeutung.
- 8 Verzicht auf die Equityfortschreibung wegen untergeordneter Bedeutung.
- 9 Befreiung gemäß § 264b HGB.
- 10 Befreiung gemäß § 264 Abs. 3 HGB.



| Stand 30.09.2010                                                                       | Kapitalanteil<br>in % |
|----------------------------------------------------------------------------------------|-----------------------|
| Telecomunicación, Electrónica y Conmutación S.A., Madrid/ Spanien                      | 100                   |
| VAI – INGDESI Automation S.L., Guecho/ Spanien                                         | 100                   |
| ANF DATA spol. s r.o., Prag/ Tschechische Republik                                     | 100                   |
| ETS Teplice s.r.o., Teplice/ Tschechische Republik                                     | 100                   |
| OEZ s.r.o., Letohrad/ Tschechische Republik                                            | 100                   |
| OSRAM Ceska republika s.r.o., Bruntál/ Tschechische Republik                           | 100                   |
| Siemens Audiologická Technika s.r.o., Prag/ Tschechische Republik                      | 100                   |
| Siemens Electric Machines s.r.o., Drasov/ Tschechische Republik                        | 100                   |
| Siemens Engineering a.s., Prag/ Tschechische Republik                                  | 100                   |
| Siemens Industrial Turbomachinery s.r.o., Brno/ Tschechische Republik                  | 100                   |
| Siemens IT Solutions and Services, s.r.o., Prag/ Tschechische Republik                 | 100                   |
| Siemens Kolejova vozidla s.r.o., in Liquidation, Prag/ Tschechische Republik           | 100 <sup>7</sup>      |
| Siemens Product Lifecycle Management Software (CZ) s.r.o., Prag/ Tschechische Republik | 100                   |
| Siemens s.r.o., Prag/ Tschechische Republik                                            | 100                   |
| OSRAM Ampul Ticaret A.S., Istanbul/ Türkei                                             | 100                   |
| Siemens Finansal Kiralama A.S., Istanbul/ Türkei                                       | 100                   |
| Siemens Healthcare Diagnostik Ticaret Limited Sirketi., Istanbul/ Türkei               | 100                   |
| Siemens Sanayi ve Ticaret A.S., Istanbul/ Türkei                                       | 100                   |
| DP OSRAM Ukraine, Kiew/ Ukraine                                                        | 100                   |
| OOO OEZ Ukraine, Kiew/ Ukraine                                                         | 100                   |
| Siemens Ukraine, Kiew/ Ukraine                                                         | 100                   |
| evosoft Hungary Szamitastechnikai Kft., Budapest/ Ungarn                               | 93                    |
| OSRAM Kft., Budapest/ Ungarn                                                           | 100                   |
| Siemens Audiologiai Technika, Budapest/ Ungarn                                         | 100                   |
| Siemens Erömütechnika Kft., Budapest/ Ungarn                                           | 100                   |
| Siemens Investor Kft., Budapest/ Ungarn                                                | 100                   |
| Siemens PSE Program- és Rendszerfejlesztő Kft., Budapest/ Ungarn                       | 100                   |
| Siemens Transzformátor Kft., Budapest/ Ungarn                                          | 100                   |
| Siemens Zrt., Budapest/ Ungarn                                                         | 100                   |
| J. N. Kelly Security Holding Limited, Larnaka/ Zypern                                  | 100                   |
| Kintec Cyprus Ltd, Larnaka/ Zypern                                                     | 100                   |
| <b>Amerika (133 Gesellschaften)</b>                                                    |                       |
| Ingdesi S.A., Buenos Aires/ Argentinien                                                | 100                   |
| OSRAM Argentina S.A.C.I., Buenos Aires/ Argentinien                                    | 100                   |

- 1 Beherrschender Einfluss durch Stimmrechtsmehrheit.
- 2 Beherrschender Einfluss durch vertragliche Gestaltungen.
- 3 Beherrschender Einfluss durch wirtschaftliche Umstände.
- 4 Fehlender beherrschender Einfluss durch vertragliche Gestaltungen bzw. rechtliche Umstände.
- 5 Fehlender maßgeblicher Einfluss durch vertragliche Gestaltungen bzw. rechtliche Umstände.

| Stand 30.09.2010                                                                       | Kapitalanteil<br>in % |
|----------------------------------------------------------------------------------------|-----------------------|
| Siemens Healthcare Diagnostics S.A., Buenos Aires/ Argentinien                         | 100                   |
| Siemens IT Services S.A., Buenos Aires/ Argentinien                                    | 100                   |
| Siemens IT Solutions and Services S.A., Buenos Aires/ Argentinien                      | 100                   |
| Siemens S.A., Buenos Aires/ Argentinien                                                | 100                   |
| VA TECH International Argentina SA, Buenos Aires/ Argentinien                          | 100                   |
| Siemens Sociedad Anónima, Santa Cruz de la Sierra/ Bolivien                            | 100                   |
| Chemtech Servicos de Engenharia e Software Ltda., Rio de Janeiro/ Brasilien            | 100                   |
| Iriel Ind. Com. Sist. Eletr. Ltda., Canoas/ Brasilien                                  | 100                   |
| OSRAM do Brasil Lampadas Elétricas Ltda., Osasco/ Brasilien                            | 100                   |
| Siemens Eletroeletronica Limitada, Manaus/ Brasilien                                   | 100                   |
| Siemens Healthcare Diagnósticos Ltda., São Paulo/ Brasilien                            | 100                   |
| Siemens Ltda., São Paulo/ Brasilien                                                    | 100                   |
| Siemens PLM Software do Brasil Ltda., São Caetano do Sul/ Brasilien                    | 100                   |
| Siemens Security Services Ltda., São Paulo/ Brasilien                                  | 100                   |
| Siemens Sistemas Para Montagem De Componentes Electronicos Ltda., São Paulo/ Brasilien | 100                   |
| Siemens Soluções e Serviços de Tecnologia da Informação Ltda., São Paulo/ Brasilien    | 100                   |
| Siemens VAI Metals Services Ltda., Volta Redonda/ Brasilien                            | 100                   |
| Turbocare Limitada, São Paulo, São Paulo/ Brasilien                                    | 100                   |
| VA TECH América do sul Ltda., Rio de Janeiro/ Brasilien                                | 100                   |
| VAI – INGDESI Automation Ltda., Belo Horizonte/ Brasilien                              | 100                   |
| Dade Behring Hong Kong Holdings Corporation, Tortola, B.V.I./ Britische Jungferninseln | 100                   |
| OSRAM Chile Ltda., Santiago de Chile/ Chile                                            | 100                   |
| Siemens Healthcare Diagnostics S.A., Santiago de Chile/ Chile                          | 100                   |
| Siemens S.A., Santiago de Chile/ Chile                                                 | 100                   |
| Siemens Healthcare Diagnostics S.A., San José/ Costa Rica                              | 51                    |
| Siemens S.A., San José/ Costa Rica                                                     | 100                   |
| Siemens Healthcare Diagnostics, S.A., Santo Domingo/ Dominikanische Republik           | 100                   |
| Siemens, S.R.L., Santo Domingo/ Dominikanische Republik                                | 100                   |
| OSRAM del Ecuador S.A., Guayaquil/ Ecuador                                             | 100                   |
| Siemens S.A., Quito/ Ecuador                                                           | 100                   |
| Siemens S.A., San Salvador/ El Salvador                                                | 100                   |
| Siemens Healthcare Diagnostics, S.A., Guatemala-Stadt/ Guatemala                       | 100                   |
| Siemens S.A., Guatemala-Stadt/ Guatemala                                               | 100                   |
| Siemens S.A., Tegucigalpa/ Honduras                                                    | 100                   |

- 6 Maßgeblicher Einfluss durch vertragliche Gestaltungen bzw. rechtliche Umstände.
- 7 Verzicht auf die Einbeziehung in den Konzernabschluss wegen untergeordneter Bedeutung.
- 8 Verzicht auf die Equityfortschreibung wegen untergeordneter Bedeutung.
- 9 Befreiung gemäß § 264b HGB.
- 10 Befreiung gemäß § 264 Abs. 3 HGB.

| Stand 30.09.2010                                                                          | Kapitalanteil<br>in % |
|-------------------------------------------------------------------------------------------|-----------------------|
| Dade Behring Holdings Hong Kong Ltd.,<br>Grand Cayman, Cayman Islands / Kaimaninseln      | 100                   |
| Siemens Healthcare Diagnostics Manufacturing Limited,<br>George Town / Kaimaninseln       | 100                   |
| Venture Strategy Cayman Partners L.P.,<br>George Town / Kaimaninseln                      | 99 <sup>3</sup>       |
| OSRAM Sylvania Ltd., Mississauga, Ontario / Kanada                                        | 100                   |
| Siemens Canada Ltd., Burlington, Ontario / Kanada                                         | 100                   |
| Siemens Financial Ltd., Mississauga, Burlington / Kanada                                  | 100                   |
| SIEMENS HEALTHCARE DIAGNOSTICS LTD.,<br>Burlington, Ontario / Kanada                      | 100                   |
| Siemens Hearing Instruments Inc., Burlington Ontario / Kanada                             | 100 <sup>7</sup>      |
| Siemens IT Solutions and Services Inc.,<br>Burlington, Ontario / Kanada                   | 100                   |
| Siemens Product Lifecycle Management Software (CA) Ltd.,<br>Mississauga, Ontario / Kanada | 100                   |
| Siemens Transformers Canada Inc.,<br>Trois Rivières, Quebec / Kanada                      | 100                   |
| Siemens Water Technologies Canada, Inc.,<br>Burlington, Ontario / Kanada                  | 100                   |
| Trench Ltd., Saint John, New Brunswick / Kanada                                           | 100                   |
| Turbocare Canada Ltd., Calgary, Alberta / Kanada                                          | 100                   |
| Wheelabrator Air Pollution Control (Canada) Inc.,<br>Burlington, Ontario / Kanada         | 100                   |
| OSRAM de Colombia Iluminaciones S.A., Bogotá / Kolumbien                                  | 100                   |
| Siemens Healthcare Diagnostics Ltda., Bogotá / Kolumbien                                  | 100                   |
| Siemens Manufacturing S.A., Bogotá / Kolumbien                                            | 100                   |
| Siemens S.A., Bogotá / Kolumbien                                                          | 100                   |
| Dade Behring, S.A. de C.V., Mexiko D.F. / Mexiko                                          | 100                   |
| Grupo Siemens S.A. de C.V., Mexiko D.F. / Mexiko                                          | 100                   |
| Industria de Trabajos Eléctricos S.A. de C.V.,<br>Ciudad Juárez / Mexiko                  | 100                   |
| Industrias OSRAM de México S.A., Tultitlán / Mexiko                                       | 100                   |
| Ingdesi S.A. de C.V., Monterrey / Mexiko                                                  | 100                   |
| OSRAM de México S.A. de C.V., Tultitlán / Mexiko                                          | 100                   |
| OSRAM S.A. de C.V., Tultitlán / Mexiko                                                    | 100                   |
| Proyectos de Energia S.A. de C.V., Mexiko D.F. / Mexiko                                   | 100                   |
| SIEMENS ELECTRONICS ASSEMBLY SYSTEMS, S. DE R.L. DE C.V.,<br>Guadalajara / Mexiko         | 100                   |
| Siemens Healthcare Diagnostics, S. de R.L. de C.V., Mexiko<br>D.F. / Mexiko               | 100                   |
| Siemens Inmobiliaria S.A. de C.V., Mexiko D.F. / Mexiko                                   | 100                   |
| Siemens Innovaciones S.A. de C.V., Mexiko D.F. / Mexiko                                   | 100                   |

| Stand 30.09.2010                                                                       | Kapitalanteil<br>in % |
|----------------------------------------------------------------------------------------|-----------------------|
| Siemens IT Business Services S de RL de CV,<br>México, D.F. / Mexiko                   | 100                   |
| Siemens IT Solutions and Services S de RL de CV,<br>México, D.F. / Mexiko              | 100                   |
| Siemens Medical Solutions Diagnostics S. de R.L. de C.V.,<br>Mexiko D.F. / Mexiko      | 100                   |
| Siemens Product Lifecycle Management Software (MX), S.A.<br>de C.V., Santa Fe / Mexiko | 100                   |
| Siemens Servicios S.A. de C.V., Mexiko D.F. / Mexiko                                   | 100                   |
| Siemens Transformadores, S.A. de C.V., Guanajuato / Mexiko                             | 100                   |
| Siemens, S.A. de C.V., Mexiko D.F. / Mexiko                                            | 100                   |
| Siemens S.A., Managua / Nicaragua                                                      | 100                   |
| Siemens Healthcare Diagnostics Panama, S.A,<br>Panama-Stadt / Panama                   | 100                   |
| Siemens S.A., Panama-Stadt / Panama                                                    | 100                   |
| OSRAM de Perú S.A.C., Lima / Peru                                                      | 100                   |
| Siemens S.A.C., Lima / Peru                                                            | 100                   |
| Siemens Healthcare Diagnostics S.A., Montevideo / Uruguay                              | 100                   |
| Siemens Telecomunicaciones S.A., Montevideo / Uruguay                                  | 51                    |
| Demag Delaval Turbomachinery Corp., Trenton, NJ / USA                                  | 100                   |
| Mannesmann Corporation, New York, NY / USA                                             | 100                   |
| Nimbus Technologies, LLC, Plano, TX / USA                                              | 100                   |
| OSRAM Opto Semiconductors, Inc., Sunnyvale, CA / USA                                   | 100                   |
| OSRAM SYLVANIA Inc., Danvers, MA / USA                                                 | 100                   |
| OSRAM SYLVANIA Products Inc., Danvers, MA / USA                                        | 100                   |
| OSRAM Sylvania Puerto Rico Corp., Luquillo, PR / USA                                   | 100                   |
| P.E.T.NET Houston, LLC, Knoxville, TN / USA                                            | 51                    |
| PETNET Indiana LLC, Indianapolis, IN / USA                                             | 50 <sup>1</sup>       |
| PETNET Solutions Cleveland, LLC, Knoxville, TN / USA                                   | 63                    |
| PETNET Solutions, Inc., Knoxville, TN / USA                                            | 100                   |
| Schlesinger-Siemens Electrical, LLC, Alpharetta, GA / USA                              | 51                    |
| Siemens Capital Company LLC, Iselin, NJ / USA                                          | 100                   |
| Siemens Corporation, New York, NY / USA                                                | 100                   |
| Siemens Credit Warehouse, Inc., Iselin, NJ / USA                                       | 100                   |
| Siemens Demag Delaval Turbomachinery, Inc.,<br>Hamilton, NJ / USA                      | 100                   |
| Siemens Diagnostics Finance Co. LLC, Deerfield, IL / USA                               | 100                   |
| Siemens Electronics Assembly Systems, LLC, Suwanee / USA                               | 100                   |
| Siemens Energy, Inc., Orlando, FL / USA                                                | 100                   |
| Siemens Financial Services, Inc., Iselin, NJ / USA                                     | 100                   |
| Siemens Financial, Inc., Iselin, NJ / USA                                              | 100                   |
| Siemens Fossil Services, Inc., Orlando, FL / USA                                       | 100                   |
| Siemens Generation Services Company, Orlando, FL / USA                                 | 100                   |

- 1 Beherrschender Einfluss durch Stimmrechtsmehrheit.
- 2 Beherrschender Einfluss durch vertragliche Gestaltungen.
- 3 Beherrschender Einfluss durch wirtschaftliche Umstände.
- 4 Fehlender beherrschender Einfluss durch vertragliche Gestaltungen bzw. rechtliche Umstände.
- 5 Fehlender maßgeblicher Einfluss durch vertragliche Gestaltungen bzw. rechtliche Umstände.

- 6 Maßgeblicher Einfluss durch vertragliche Gestaltungen bzw. rechtliche Umstände.
- 7 Verzicht auf die Einbeziehung in den Konzernabschluss wegen untergeordneter Bedeutung.
- 8 Verzicht auf die Equityfortschreibung wegen untergeordneter Bedeutung.
- 9 Befreiung gemäß § 264b HGB.
- 10 Befreiung gemäß § 264 Abs. 3 HGB.

| Stand 30.09.2010                                                     | Kapitalanteil<br>in % |
|----------------------------------------------------------------------|-----------------------|
| Siemens Government Services, Inc., Reston, VA/USA                    | 100                   |
| Siemens Healthcare Diagnostics Inc., Tarrytown/USA                   | 100                   |
| Siemens Hearing Instruments, Inc., Piscataway, NJ/USA                | 100                   |
| Siemens Industry, Inc., Buffalo Grove, IL/USA                        | 100                   |
| Siemens IT Solutions and Services, Inc., Norwalk, CT/USA             | 100                   |
| Siemens Medical Solutions USA, Inc., Malvern, PA/USA                 | 100                   |
| Siemens Molecular Imaging, Inc., Knoxville, TN/USA                   | 100                   |
| Siemens Power Generation Service Company, Ltd., Orlando, FL/USA      | 100                   |
| Siemens Product Lifecycle Management Software II (US), Plano, TX/USA | 100                   |
| Siemens Product Lifecycle Management Software Inc., Plano, TX/USA    | 100                   |
| Siemens Public, Inc., Wilmington, DE/USA                             | 100                   |
| Siemens Treated Water Outsourcing Corp., Rockford, IL/USA            | 100                   |
| Siemens USA Holdings, Inc., New York, NY/USA                         | 100                   |
| Siemens Water Technologies Corp., Warrendale, PA/USA                 | 100                   |
| Siemens Water Technologies Holding Corp., Warrendale, PA/USA         | 100                   |
| SMI Holding LLC, New York, NY/USA                                    | 100                   |
| Sylvania Lighting Services Corp., Danvers, MA/USA                    | 100                   |
| The Colorado Medical Cyclotron, LLC, Knoxville, TN/USA               | 90                    |
| Transport & Distribution Inc., Danvers, MA/USA                       | 100                   |
| Traxon Supply USA Inc., EAST RUTHERFORD, NJ/USA                      | 100                   |
| Turbine Airfoil Coating & Repair LLC, Middletown, NY/USA             | 51 <sup>3</sup>       |
| Turblex Inc., Springfield, MO/USA                                    | 100                   |
| TurboCare, Inc., Chicopee, MA/USA                                    | 100                   |
| Wheelabrator Air Pollution Control Inc., Pittsburgh, PA/USA          | 100                   |
| Winergy Drive Systems Corp., Elgin, IL/USA                           | 100                   |
| Siemens Electro Industrial S.A., Caracas/Venezuela                   | 100 <sup>7</sup>      |
| Siemens Healthcare Diagnostics C.A., Caracas/Venezuela               | 100                   |
| Siemens S.A., Caracas/Venezuela                                      | 100                   |
| TurboCare C.A., Caracas/Venezuela                                    | 100                   |
| <b>Asien (183 Gesellschaften)</b>                                    |                       |
| Siemens W.L.L., Manama/Bahrein                                       | 51                    |
| Siemens Bangladesh Ltd., Dhaka/Bangladesch                           | 100                   |
| Beijing Siemens Cerberus Electronics Ltd., Beijing/China             | 80                    |
| Chengdu KK&K Power Fan Co., Ltd., Chengdu/China                      | 51                    |
| Chung Tak Lighting Control Systems (Guangzhou) Ltd., Guangzhou/China | 59                    |
| DPC (Tianjin) Co., Ltd., Tianjin/China                               | 100                   |
| Morgan Mill Parts (Shanghai) Co., Ltd., Shanghai/China               | 100                   |

| Stand 30.09.2010                                                      | Kapitalanteil<br>in % |
|-----------------------------------------------------------------------|-----------------------|
| Morgan Morgoil (Shanghai) Company, Ltd., Shanghai/China               | 100                   |
| Morgan Rolling Mill (Shanghai) Co., Ltd., Shanghai/China              | 100                   |
| MWB (Shanghai) Co Ltd., Shanghai/China                                | 65                    |
| Ningbo Zuoming Electronics Co. Ltd., Ningbo/China                     | 100                   |
| OSRAM China Lighting Ltd., Foshan/China                               | 90                    |
| OSRAM Kunshan Display Optic Co. Ltd., Kunshan/China                   | 100                   |
| Siemens Building Technologies (Tianjin) Ltd., Tianjin/China           | 70                    |
| Siemens Circuit Protection Systems Ltd., Shanghai/China               | 75                    |
| Siemens Electrical Apparatus Ltd., Suzhou/China                       | 100                   |
| Siemens Electrical Drives (Shanghai) Ltd., Shanghai/China             | 100                   |
| Siemens Electrical Drives Ltd., Tianjin/China                         | 85                    |
| Siemens Electronics Assembly Systems Ltd., Shanghai, Shanghai/China   | 100                   |
| Siemens Factory Automation Engineering Ltd., Beijing/China            | 68                    |
| Siemens Finance and Leasing Ltd., Beijing/China                       | 100                   |
| Siemens Financial Services Ltd., Beijing/China                        | 100                   |
| Siemens Gas Turbine Parts Ltd., Shanghai/China                        | 51                    |
| Siemens Healthcare Diagnostics (Shanghai) Co. Ltd., Shanghai/China    | 100                   |
| Siemens Hearing Instruments (Suzhou) Co. Ltd., Suzhou/China           | 100                   |
| Siemens High Voltage Circuit Breakers Ltd., Hangzhou/China            | 51                    |
| Siemens High Voltage Switchgear Guangzhou Ltd., Guangzhou/China       | 94                    |
| Siemens High Voltage Switchgear Ltd., Shanghai/China                  | 51                    |
| Siemens Industrial Automation Ltd., Shanghai, Shanghai/China          | 90                    |
| Siemens Industrial Turbomachinery (Huludao) Co. Ltd., Huludao/China   | 70                    |
| Siemens Industry Software (Shanghai) Co., Ltd., Shanghai/China        | 100                   |
| Siemens International Trading Ltd., Shanghai, Shanghai/China          | 100                   |
| Siemens Ltd., China, Beijing/China                                    | 100                   |
| Siemens Manufacturing and Engineering Centre Ltd., Shanghai/China     | 51                    |
| Siemens Mechanical Drive Systems (Tianjin) Co., Ltd., Tianjin/China   | 100                   |
| Siemens Medical Solutions Diagnostics Ltd., Beijing/China             | 100                   |
| Siemens Medium Voltage Switching Technologies (Wuxi) Ltd., Wuxi/China | 85                    |
| Siemens Mindit Magnetic Resonance Ltd., Shenzhen/China                | 95                    |
| Siemens Numerical Control Ltd., Nanjing/China                         | 80                    |
| Siemens PLM Software (Shenzhen) Limited, Shenzhen/China               | 100                   |
| Siemens Power Automation Ltd., Nanjing/China                          | 100                   |

- 1 Beherrschender Einfluss durch Stimmrechtsmehrheit.
- 2 Beherrschender Einfluss durch vertragliche Gestaltungen.
- 3 Beherrschender Einfluss durch wirtschaftliche Umstände.
- 4 Fehlender beherrschender Einfluss durch vertragliche Gestaltungen bzw. rechtliche Umstände.
- 5 Fehlender maßgeblicher Einfluss durch vertragliche Gestaltungen bzw. rechtliche Umstände.

- 6 Maßgeblicher Einfluss durch vertragliche Gestaltungen bzw. rechtliche Umstände.
- 7 Verzicht auf die Einbeziehung in den Konzernabschluss wegen untergeordneter Bedeutung.
- 8 Verzicht auf die Equityfortschreibung wegen untergeordneter Bedeutung.
- 9 Befreiung gemäß § 264b HGB.
- 10 Befreiung gemäß § 264 Abs. 3 HGB.

| Stand 30.09.2010                                                                 | Kapitalanteil<br>in % |
|----------------------------------------------------------------------------------|-----------------------|
| Siemens Power Equipment Packages Co. Ltd., Shanghai,<br>Shanghai/China           | 65                    |
| Siemens Power Plant Automation Ltd., Nanjing/China                               | 100                   |
| Siemens Process Analytics Co. Ltd., Shanghai, Shanghai/China                     | 100                   |
| Siemens Program and System Engineering (Nanjing) Co. Ltd.,<br>Nanjing/China      | 100                   |
| Siemens Real Estate Management (Beijing) Ltd., Co.,<br>Beijing/China             | 100                   |
| Siemens Sensors & Communication Ltd., Dalian/China                               | 100                   |
| Siemens Shanghai Medical Equipment Ltd., Shanghai/China                          | 100                   |
| Siemens Signalling Co. Ltd., Xi'an, Xian/China                                   | 70                    |
| Siemens Standard Motors Ltd., Jiangsu, Yizheng/China                             | 100                   |
| Siemens Surge Arresters Ltd., Wuxi/China                                         | 100                   |
| Siemens Switchgear Co. Ltd., Shanghai/China                                      | 55                    |
| Siemens Technology Development (Beijing) Ltd. Corp.,<br>Beijing/China            | 90                    |
| Siemens Transformer (Guangzhou) Co., Ltd., Guangzhou/China                       | 63                    |
| Siemens Transformer (Wuhan) Company Ltd.,<br>Wuhan City/China                    | 100                   |
| Siemens Transformer Company Ltd., Jinan/China                                    | 90                    |
| Siemens VAI Manufacturing (Taicang) Co., Ltd., Taicang/China                     | 100                   |
| Siemens Water Technologies and Engineering (Tianjin) Co.,<br>Ltd., Tianjin/China | 68                    |
| Siemens Water Technologies Ltd., Beijing/China                                   | 100                   |
| Siemens Wind Power Blades (Shanghai) Co., Ltd.,<br>Shanghai/China                | 100                   |
| Siemens Wind Power Turbines (Shanghai) Co. Ltd.,<br>Shanghai/China               | 100                   |
| Siemens Wiring Accessories Shandong Ltd., Zibo/China                             | 68                    |
| Siemens X-Ray Vacuum Technology Ltd., Wuxi/China                                 | 100                   |
| Sunny World (Shaoxing) Green Lighting Co., Ltd.,<br>Shaoxing/China               | 100                   |
| Trench High Voltage Products Ltd., Shenyang,<br>Shenyang/China                   | 65                    |
| Winergy Drive Systems (Tianjin) Co. Ltd., Tianjin/China                          | 100                   |
| Asia Care Holding Limited, Hongkong/Hongkong                                     | 100 <sup>7</sup>      |
| Morgan-China Ltd., Hongkong/Hongkong                                             | 100                   |
| OSRAM Asia Pacific Ltd., Hongkong/Hongkong                                       | 100                   |
| OSRAM Holding Company Ltd., Hongkong/Hongkong                                    | 100                   |
| OSRAM Lighting Control Systems Ltd., Hongkong/Hongkong                           | 65                    |
| OSRAM Opto Semiconductors Asia Ltd., Hongkong/Hongkong                           | 100                   |
| Siemens Building Technologies (Hong Kong/China) Ltd.,<br>Hongkong/Hongkong       | 100                   |

| Stand 30.09.2010                                                                           | Kapitalanteil<br>in % |
|--------------------------------------------------------------------------------------------|-----------------------|
| Siemens Healthcare Diagnostics Limited,<br>Hongkong/Hongkong                               | 100                   |
| Siemens Ltd., Hongkong/Hongkong                                                            | 100                   |
| Siemens Product Lifecycle Management Software (HK)<br>Limited, Hongkong/Hongkong           | 100                   |
| Siemens Water Technologies International Sales Ltd.,<br>Hongkong/Hongkong                  | 100                   |
| Sunny World Ltd., Hongkong/Hongkong                                                        | 80                    |
| Traxon Technologies Ltd., Hongkong/Hongkong                                                | 51                    |
| Flender Ltd., Kolkata/Indien                                                               | 100                   |
| Morgan Construction Company India Private Limited,<br>Mumbai/Indien                        | 100                   |
| OSRAM India Pvt. Ltd., Gurgaon/Indien                                                      | 100                   |
| PETNET Radiopharmaceutical Solutions Pvt. Ltd.,<br>Neu Delhi/Indien                        | 100                   |
| Powerplant Performance Improvement Ltd., Neu Delhi/Indien                                  | 50 <sup>1</sup>       |
| Siemens Building Technologies Pvt. Ltd., Chennai/Indien                                    | 100                   |
| Siemens Corporate Finance Pvt. Ltd., Mumbai/Indien                                         | 100                   |
| Siemens Demag Delaval Turbomachinery Pvt. Ltd., Pune/Indien                                | 100 <sup>7</sup>      |
| Siemens Financial Services Private Limited,<br>Mumbai, India, Mumbai/Indien                | 100                   |
| Siemens Healthcare Diagnostics Ltd., Vadodara/Indien                                       | 69                    |
| Siemens Hearing Instruments Pvt. Ltd., Bengaluru/Indien                                    | 100                   |
| Siemens Information Processing Services Pvt. Ltd.,<br>Bengaluru/Indien                     | 100                   |
| Siemens Information Systems Ltd., Mumbai/Indien                                            | 100                   |
| Siemens IT Solutions and Services Pvt. Ltd., Mumbai/Indien                                 | 100                   |
| Siemens Ltd., Mumbai/Indien                                                                | 55                    |
| Siemens Nixdorf Information Systems Pvt. Ltd., Mumbai/Indien                               | 100                   |
| Siemens Power Engineering Pvt. Ltd., Gurgaon/Indien                                        | 100                   |
| Siemens Product Lifecycle Management Software (India)<br>Private Limited, Neu Delhi/Indien | 100                   |
| Siemens Rolling Stock Pvt. Ltd., Mumbai/Indien                                             | 100                   |
| Siemens VAI Metals Technologies Private Limited,<br>Kolkata/Indien                         | 100                   |
| Vista Security Technics Private Limited, Chennai/Indien                                    | 100                   |
| Winergy Drive Systems India Pvt. Ltd., Chennai/Indien                                      | 100                   |
| P.T. OSRAM Indonesia, Tangerang/Indonesien                                                 | 100                   |
| P.T. Siemens Hearing Instruments, Batam/Indonesien                                         | 100                   |
| P.T. Siemens Indonesia, Jakarta/Indonesien                                                 | 100                   |
| Demag Delaval Desoil Services (Sherkate Sahami Khass),<br>Qeshm/Iran                       | 51                    |
| OSRAM Lamp (P.J.S) Co., Teheran/Iran                                                       | 100                   |

- 1 Beherrschender Einfluss durch Stimmrechtsmehrheit.
- 2 Beherrschender Einfluss durch vertragliche Gestaltungen.
- 3 Beherrschender Einfluss durch wirtschaftliche Umstände.
- 4 Fehlender beherrschender Einfluss durch vertragliche Gestaltungen bzw. rechtliche Umstände.
- 5 Fehlender maßgeblicher Einfluss durch vertragliche Gestaltungen bzw. rechtliche Umstände.

- 6 Maßgeblicher Einfluss durch vertragliche Gestaltungen bzw. rechtliche Umstände.
- 7 Verzicht auf die Einbeziehung in den Konzernabschluss wegen untergeordneter Bedeutung.
- 8 Verzicht auf die Equityfortschreibung wegen untergeordneter Bedeutung.
- 9 Befreiung gemäß § 264b HGB.
- 10 Befreiung gemäß § 264 Abs. 3 HGB.

| Stand 30.09.2010                                                                | Kapitalanteil<br>in % |
|---------------------------------------------------------------------------------|-----------------------|
| Siemens Sherkate Sahami (Khash), Teheran/Iran                                   | 96                    |
| Robcad Limited, Herzliya/Israel                                                 | 100                   |
| Siemens Concentrated Solar Power Ltd., Beit Shemesh/Israel                      | 100                   |
| Siemens Israel Ltd., Tel Aviv/Israel                                            | 100                   |
| Siemens Product Lifecycle Management Software (IL) Ltd., Herzliya/Israel        | 100                   |
| Siemens Product Lifecycle Management Software 2 (IL) Ltd., Herzliya/Israel      | 100                   |
| UGS Israeli Holdings (Israel) Ltd., Herzliya/Israel                             | 100                   |
| Hokkaido Kikoeno Plaza, Hokkaido/Japan                                          | 85                    |
| Kikoeno Soudanshitsu, Mie/Japan                                                 | 100                   |
| Koden, Hiroshima/Japan                                                          | 54                    |
| Mochida Siemens Medical Systems Co. Ltd., Tokio/Japan                           | 90                    |
| OSRAM Ltd., Yokohama/Japan                                                      | 100                   |
| OSRAM-MELCO Ltd., Yokohama/Japan                                                | 51                    |
| OSRAM-MELCO Toshiba Lighting Ltd., Yokosuka/Japan                               | 50 <sup>1</sup>       |
| Seiko Hochouki, Aichi/Japan                                                     | 86                    |
| Siemens Financial Services K.K., Tokio/Japan                                    | 100                   |
| Siemens Healthcare Diagnostics K.K., Tokio/Japan                                | 100                   |
| Siemens Hearing Instruments K.K., Tokio/Japan                                   | 100                   |
| Siemens Japan Holding K.K., Tokio/Japan                                         | 100                   |
| Siemens Japan K.K., Tokio/Japan                                                 | 100                   |
| Siemens Kameda Healthcare IT Systems K.K., Tokio/Japan                          | 67                    |
| Siemens Product Lifecycle Management Software (JP) K.K., Tokio/Japan            | 100                   |
| Siemens Product Lifecycle Management Software II (JP) K.K., Tokio/Japan         | 100                   |
| Siemens TOO, Almaty/Kasachstan                                                  | 100                   |
| OSRAM Korea Co. Ltd., Ansan-City/Korea                                          | 100                   |
| Siemens Healthcare Diagnostics Limited, Seoul/Korea                             | 100                   |
| Siemens Ltd., Seoul/Korea                                                       | 100                   |
| Siemens PETNET Korea Co. Ltd., Seoul/Korea                                      | 100                   |
| Siemens Product Lifecycle Management Software (KR) Ltd., Seoul/Korea            | 100                   |
| Siemens Electrical & Electronic Services K.S.C., Kuwait/Kuwait                  | 47 <sup>2</sup>       |
| Dade Behring Diagnostics (Malaysia) Sdn. Bhd., Petalang Jaya, Selangor/Malaysia | 100                   |
| EPE Reyrolle (Malaysia) Sdn. Bhd., Kuala Lumpur/Malaysia                        | 100                   |
| OSRAM (Malaysia) Sdn. Bhd., Kuala Lumpur/Malaysia                               | 100                   |
| Osram Opto Semiconductors (Malaysia) Sdn Bhd, Penang/Malaysia                   | 100                   |
| Siemens Healthcare Diagnostics Sdn. Bhd., Petaling Jaya/Malaysia                | 100                   |

| Stand 30.09.2010                                                                   | Kapitalanteil<br>in % |
|------------------------------------------------------------------------------------|-----------------------|
| Siemens Malaysia Sdn. Bhd., Petaling Jaya/Malaysia                                 | 100                   |
| Siemens Transportation Turnkey Systems Sdn. Bhd., Kuala Lumpur/Malaysia            | 100                   |
| Sountex Hearing Instruments Sdn. Bhd., Kuala Lumpur/Malaysia                       | 100                   |
| VA TECH Holdings (Malaysia) Sdn. Bhd., Kuala Lumpur/Malaysia                       | 100                   |
| VA TECH Malaysia Sdn., Kuala Lumpur/Malaysia                                       | 30 <sup>2</sup>       |
| Siemens L.L.C., Muscat/Oman                                                        | 51                    |
| Siemens Pakistan Engineering Co. Ltd., Karachi/Pakistan                            | 66                    |
| Dade Behring Diagnostics Philippines, Inc., Manila/Philippinen                     | 100                   |
| Siemens IT Solutions and Services Inc., Manila/Philippinen                         | 100                   |
| Siemens Power Operations, Inc., Manila/Philippinen                                 | 100                   |
| Siemens, Inc., Manila/Philippinen                                                  | 100                   |
| Siemens W.L.L., Doha/Qatar                                                         | 49 <sup>2</sup>       |
| Arabia Electric Ltd. (Equipment), Jeddah/Saudi-Arabien                             | 51                    |
| ISCOSA Industries and Maintenance Ltd., Riad/Saudi-Arabien                         | 51                    |
| Siemens Ltd., Jeddah/Saudi-Arabien                                                 | 51                    |
| VA TECH T & D Co. Ltd., Riad/Saudi-Arabien                                         | 51                    |
| Westinghouse Saudi Arabia Ltd., Riad/Saudi-Arabien                                 | 100 <sup>7</sup>      |
| iMetrex Technologies Pte. Ltd., Singapur/Singapur                                  | 100                   |
| OSRAM Pte. Ltd., Singapur/Singapur                                                 | 100                   |
| PETNET Solutions Private Limited, Singapur/Singapur                                | 100                   |
| Siemens Electronics Assembly Systems Pte. Ltd, Singapur/Singapur                   | 100                   |
| Siemens Healthcare Diagnostics Pte. Ltd., Singapur/Singapur                        | 100                   |
| Siemens IT Solutions and Services Operations Pte. Ltd, Singapur/Singapur           | 100                   |
| Siemens Medical Instruments Pte. Ltd., Singapur/Singapur                           | 100                   |
| Siemens Product Lifecycle Management Software (SG) Pte. Ltd., Singapur/Singapur    | 100                   |
| Siemens Product Lifecycle Management Software II (SG) Pte. Ltd., Singapur/Singapur | 100                   |
| Siemens Pte. Ltd., Singapur/Singapur                                               | 100                   |
| OSRAM Taiwan Company Ltd., Taipeh/Taiwan                                           | 100                   |
| Siemens Ltd., Taipeh/Taiwan                                                        | 100                   |
| Siemens Product Lifecycle Management Software (TW) Co. Ltd., Taipeh/Taiwan         | 100                   |
| OSRAM Thailand Co. Ltd., Bangkok/Thailand                                          | 100                   |
| Siemens IT Solutions and Services Ltd., Bangkok/Thailand                           | 100                   |
| Siemens Limited, Bangkok/Thailand                                                  | 99                    |
| Siemens Product Lifecycle Management Software (TH) Co. Ltd., Bangkok/Thailand      | 100                   |

- 1 Beherrschender Einfluss durch Stimmrechtsmehrheit.
- 2 Beherrschender Einfluss durch vertragliche Gestaltungen.
- 3 Beherrschender Einfluss durch wirtschaftliche Umstände.
- 4 Fehlender beherrschender Einfluss durch vertragliche Gestaltungen bzw. rechtliche Umstände.
- 5 Fehlender maßgeblicher Einfluss durch vertragliche Gestaltungen bzw. rechtliche Umstände.

- 6 Maßgeblicher Einfluss durch vertragliche Gestaltungen bzw. rechtliche Umstände.
- 7 Verzicht auf die Einbeziehung in den Konzernabschluss wegen untergeordneter Bedeutung.
- 8 Verzicht auf die Equityfortschreibung wegen untergeordneter Bedeutung.
- 9 Befreiung gemäß § 264b HGB.
- 10 Befreiung gemäß § 264 Abs. 3 HGB.

| Stand 30.09.2010                                                          | Kapitalanteil<br>in % |
|---------------------------------------------------------------------------|-----------------------|
| VA TECH Holding (Thailand) Co. Ltd., Bangkok/Thailand                     | 49 <sup>2</sup>       |
| VA TECH Transmission & Distribution Co. Ltd., Bangkok/Thailand            | 100                   |
| OSRAM Middle East FZE, Dubai/Vereinigte Arabische Emirate                 | 100                   |
| SD (Middle East) LLC, Dubai/Vereinigte Arabische Emirate                  | 49 <sup>2</sup>       |
| Siemens LLC, Abu Dhabi/Vereinigte Arabische Emirate                       | 49 <sup>2</sup>       |
| Siemens Middle East, FZ-LLC, Dubai/Vereinigte Arabische Emirate           | 100                   |
| Siemens Automation Systems Ltd., Binh Duong/Vietnam                       | 100                   |
| Siemens Ltd., Ho Chi Minh City/Vietnam                                    | 100                   |
| <b>Afrika (37 Gesellschaften)</b>                                         |                       |
| Siemens Healthcare Diagnostics S.A.E, Kairo/Ägypten                       | 100                   |
| Siemens Ltd. for Trading, Kairo/Ägypten                                   | 100                   |
| Siemens Technologies S.A.E., Kairo/Ägypten                                | 90                    |
| ESTEL Rail Automation SPA, Algier/Algerien                                | 51                    |
| Siemens Spa, Algier/Algerien                                              | 100                   |
| Siemens S.A., Luanda/Angola                                               | 51                    |
| Siemens (Pvt) Ltd., Addis Abeba/Äthiopien                                 | 100                   |
| Siemens Kenya Ltd., Nairobi/Kenia                                         | 100                   |
| SCIENTIFIC MEDICAL SOLUTION DIAGNOSTICS S.A.R.L., Casablanca/Marokko      | 100                   |
| Siemens Plant Operations Tahaddart SARL, Tanger/Marokko                   | 100                   |
| Siemens S.A., Casablanca/Marokko                                          | 100                   |
| Siemens Lda., Maputo/Mosambik                                             | 100                   |
| Siemens Pty. Ltd., Windhoek/Namibia                                       | 100                   |
| Siemens Ltd., Lagos/Nigeria                                               | 68                    |
| Siemens Pty. Ltd., Gaborone/Republik Botswana                             | 100                   |
| Siemens Pvt. Ltd., Harare/Simbabwe                                        | 100 <sup>7</sup>      |
| Business Venture Investments No 626 (Pty) Ltd, Johannesburg/Südafrika     | 0 <sup>3</sup>        |
| Comos Industry Solutions (Pty) Ltd, Bryanston, Johannesburg/Südafrika     | 100                   |
| Dade Behring South Africa (Pty) Ltd, Randjesfontein/Südafrika             | 100                   |
| Flender Power Transmission (Pty) Ltd., Johannesburg/Südafrika             | 100                   |
| Linacre Investments (Pty) Ltd., Kenilworth/Südafrika                      | 0 <sup>3</sup>        |
| Marqott (Proprietary) Limited, Pretoria/Südafrika                         | 100                   |
| Marqott Holdings (Pty.) Ltd., Pretoria/Südafrika                          | 100                   |
| OSRAM (Pty.) Ltd., Midrand/Südafrika                                      | 100                   |
| Siemed Services (Pty.) Ltd., Mayville/Südafrika                           | 51                    |
| Siemens Building Technologies (Pty) Ltd., Midrand, Johannesburg/Südafrika | 100                   |

| Stand 30.09.2010                                                                           | Kapitalanteil<br>in % |
|--------------------------------------------------------------------------------------------|-----------------------|
| Siemens Healthcare Diagnostics (Pty.) Limited, Isando/Südafrika                            | 100                   |
| Siemens Hearing Solution (Pty.) Ltd., Randburg/Südafrika                                   | 100                   |
| Siemens IT Solutions and Services (Pty) Ltd., Johannesburg/Südafrika                       | 100                   |
| Siemens IT Solutions and Services Holdings (Pty) Ltd., Johannesburg/Südafrika              | 100                   |
| Siemens IT Solutions and Services South Africa (Pty) Ltd, Midrand, Halfway House/Südafrika | 100                   |
| Siemens Ltd., Midrand/Südafrika                                                            | 70                    |
| Siemens Real Estate Management (Pty.) Ltd., Umtata/Südafrika                               | 100                   |
| SIEMENS VAI METALS SERVICES (Pty) Ltd., Johannesburg/Südafrika                             | 100                   |
| VDO Car Communication South Africa (Pty.) Ltd., Martindale/Südafrika                       | 100 <sup>7</sup>      |
| Siemens Tanzania Ltd., Dar Es Salaam/Tansania                                              | 100                   |
| Siemens S.A., Tunis/Tunesien                                                               | 100                   |
| <b>Australien/Neuseeland/Ozeanien (13 Gesellschaften)</b>                                  |                       |
| Eden Technology Pty Ltd, Victoria/Australien                                               | 100 <sup>7</sup>      |
| Memcor Australia Pty. Ltd., South Windsor/Australien                                       | 100                   |
| OSRAM Australia Pty. Ltd., Sydney/Australien                                               | 100                   |
| Siemens Building Technologies Pty. Ltd., Mount Waverley/Australien                         | 100 <sup>7</sup>      |
| Siemens Healthcare Diagnostics Limited, Bayswater/Australien                               | 100                   |
| Siemens Hearing Instruments Pty. Ltd., Bayswater/Australien                                | 100                   |
| Siemens IT Solutions and Services Pty. Ltd., Victoria/Australien                           | 100                   |
| Siemens Ltd., Bayswater/Australien                                                         | 100                   |
| Siemens Product Lifecycle Management Software (AUS) Pty Ltd., Melbourne/Australien         | 100                   |
| Siemens Rail Services Bayside Pty. Ltd., Bayside/Australien                                | 100                   |
| Siemens Rail Services Swanston Pty. Ltd., Swanston/Australien                              | 100                   |
| Siemens (N.Z.) Ltd., Auckland/Neuseeland                                                   | 100                   |
| Siemens Healthcare Diagnostics Limited, Wellington/Neuseeland                              | 100                   |
| <b>Assoziierte Unternehmen und Gemeinschaftsunternehmen</b>                                |                       |
| <b>Deutschland (45 Gesellschaften)</b>                                                     |                       |
| ATS Projekt Grevenbroich GmbH, Schüttorf                                                   | 25 <sup>8</sup>       |
| BELLIS GmbH, Braunschweig                                                                  | 49 <sup>8</sup>       |
| Berufsbildungszentrum ESTA-Flender GmbH, Wittgensdorf                                      | 50 <sup>8</sup>       |
| BGZ Beteiligungsgesellschaft Zukunftsenergien AG, Husum                                    | 25                    |

- 1 Beherrschender Einfluss durch Stimmrechtsmehrheit.
- 2 Beherrschender Einfluss durch vertragliche Gestaltungen.
- 3 Beherrschender Einfluss durch wirtschaftliche Umstände.
- 4 Fehlender beherrschender Einfluss durch vertragliche Gestaltungen bzw. rechtliche Umstände.
- 5 Fehlender maßgeblicher Einfluss durch vertragliche Gestaltungen bzw. rechtliche Umstände.

- 6 Maßgeblicher Einfluss durch vertragliche Gestaltungen bzw. rechtliche Umstände.
- 7 Verzicht auf die Einbeziehung in den Konzernabschluss wegen untergeordneter Bedeutung.
- 8 Verzicht auf die Equityfortschreibung wegen untergeordneter Bedeutung.
- 9 Befreiung gemäß § 264b HGB.
- 10 Befreiung gemäß § 264 Abs. 3 HGB.



| Stand 30.09.2010                                                                                                   | Kapitalanteil<br>in % |
|--------------------------------------------------------------------------------------------------------------------|-----------------------|
| BSH Bosch und Siemens Hausgeräte GmbH, München                                                                     | 50                    |
| BWI Informationstechnik GmbH, Meckenheim                                                                           | 50 <sup>a</sup>       |
| DKS Dienstleistungsgesellschaft f. Kommunikationsanlagen des Stadt- und Regionalverkehrs mbH, Köln                 | 49 <sup>a</sup>       |
| Erlangen AG Technologie Scouting und Marketing, Erlangen                                                           | 32 <sup>a</sup>       |
| FEAG Fertigungscenter für Elektrische Anlagen GmbH, Erlangen                                                       | 49 <sup>a</sup>       |
| GKZ Krefeld Beteiligungs-Gesellschaft zur Errichtung und zum Betrieb radiochirurgischer Einrichtungen mbH, Krefeld | 41 <sup>a</sup>       |
| GKZ Krefeld Gesellschaft zur Errichtung und zum Betrieb radiochirurgischer Einrichtungen mbH & Co. KG, Krefeld     | 41 <sup>a</sup>       |
| HANSATON Akustik GmbH, Hamburg                                                                                     | 50 <sup>a</sup>       |
| IFTEC GmbH & Co. KG, Leipzig                                                                                       | 50                    |
| Infineon Technologies Bipolar GmbH & Co. KG, Warstein                                                              | 40                    |
| Infineon Technologies Bipolar Verwaltungs-GmbH, Warstein                                                           | 40 <sup>a</sup>       |
| Inge Watertechnologies AG, Greifenberg                                                                             | 23 <sup>a</sup>       |
| Innovative Wind Concepts GmbH, Husum                                                                               | 50                    |
| Krauss-Maffei Wegmann GmbH & Co. KG, München                                                                       | 49                    |
| Krauss-Maffei Wegmann Verwaltungs-GmbH, München                                                                    | 49 <sup>a</sup>       |
| Krempel Isolierteile GmbH & Co. KG, Thalheim                                                                       | 49                    |
| Krempel Isolierteile Verwaltungs-GmbH, Thalheim                                                                    | 49 <sup>a</sup>       |
| LIB Verwaltungs-GmbH, Leipzig                                                                                      | 50 <sup>a</sup>       |
| Lightcycle Retourlogistik und Service GmbH, München                                                                | 47 <sup>a</sup>       |
| Maschinenfabrik Reinhausen GmbH, Regensburg                                                                        | 26                    |
| Maxxtec AG, Sinsheim                                                                                               | 22                    |
| MeVis BreastCare GmbH & Co. KG, Bremen                                                                             | 49                    |
| MeVis BreastCare Verwaltungsgesellschaft mbH, Bremen                                                               | 49 <sup>a</sup>       |
| Partikeltherapiezentrum Kiel GmbH & Co. KG, Kiel                                                                   | 50 <sup>a</sup>       |
| PolyIC GmbH & Co. KG, Fürth                                                                                        | 49                    |
| PolyIC Verwaltungs GmbH, Fürth                                                                                     | 49 <sup>a</sup>       |
| Power Vermögensbeteiligungsgesellschaft mbH Die Erste, Hamburg                                                     | 50 <sup>a</sup>       |
| PTZ Partikeltherapiezentrum Kiel Management GmbH, Wiesbaden                                                        | 50 <sup>a</sup>       |
| RITOS GmbH, Mömbris                                                                                                | 50 <sup>a</sup>       |
| Setrix AG, München                                                                                                 | 26                    |
| SIEKAP Industrial Services Gernsbach GmbH, Gernsbach                                                               | 50 <sup>a</sup>       |
| Siemens-Electrogeräte GmbH, München                                                                                | 100 <sup>a,8</sup>    |
| SKAG Eurocash, München                                                                                             | 16 <sup>6</sup>       |
| SKAG Euroinvest Corporates, München                                                                                | 40                    |
| Symeo GmbH, Neubiberg                                                                                              | 76 <sup>a,8</sup>     |
| Thermosensorik GmbH, Erlangen                                                                                      | 45                    |
| Transrapid International Verwaltungsgesellschaft mbH i. L., Berlin                                                 | 50 <sup>a</sup>       |

- 1 Beherrschender Einfluss durch Stimmrechtsmehrheit.
- 2 Beherrschender Einfluss durch vertragliche Gestaltungen.
- 3 Beherrschender Einfluss durch wirtschaftliche Umstände.
- 4 Fehlender beherrschender Einfluss durch vertragliche Gestaltungen bzw. rechtliche Umstände.
- 5 Fehlender maßgeblicher Einfluss durch vertragliche Gestaltungen bzw. rechtliche Umstände.

| Stand 30.09.2010                                                                            | Kapitalanteil<br>in % |
|---------------------------------------------------------------------------------------------|-----------------------|
| Voith Hydro Holding GmbH & Co. KG, Heidenheim                                               | 35                    |
| Voith Hydro Holding Verwaltungs GmbH, Heidenheim                                            | 35 <sup>a</sup>       |
| Wohnen am Wedding KG THG Immobilien-Fondsgesellschaft mbH & Co., Berlin                     | 26 <sup>a</sup>       |
| Wustermark Energie GWK Beteiligungs-GmbH, Hamburg                                           | 50 <sup>a</sup>       |
| <b>Europa (ohne Deutschland) (78 Gesellschaften)</b>                                        |                       |
| EMGO N.V., Lommel / Belgien                                                                 | 50                    |
| M-Brussels Invest S.A./N.V. i. L., Brüssel / Belgien                                        | 25 <sup>a</sup>       |
| T-Power NV, Brüssel / Belgien                                                               | 33                    |
| Recylum Societe par Actions Simplifiée, Paris / Frankreich                                  | 25 <sup>a</sup>       |
| TRIXELL S.A.S., Moirans / Frankreich                                                        | 25                    |
| Anakiklosi Siskevon Simeotochiki S.A., Piräus / Griechenland                                | 20 <sup>a</sup>       |
| Eviop-Tempo A.E. Electrical Equipment Manufacturers, Vassilikó Évias / Euböa / Griechenland | 48                    |
| Gwynt y Mor Offshore Wind Farm Limited, Swindon, Swindon / Großbritannien                   | 10 <sup>6</sup>       |
| Kempston (1987) Limited, Croydon, Surrey / Großbritannien                                   | 50 <sup>a</sup>       |
| Lincs Renewable Energy Holdings Limited, London / Großbritannien                            | 50                    |
| OsteoDynamix Ltd., London, UK / Großbritannien                                              | 38 <sup>a</sup>       |
| Plessey Holdings Ltd., Frimley, Surrey / Großbritannien                                     | 50 <sup>a</sup>       |
| Pyreos Limited, Edinburgh, Schottland / Großbritannien                                      | 50 <sup>a</sup>       |
| SMart Wind Limited, London / Großbritannien                                                 | 50                    |
| Unincorporated Joint Venture Gwynt y Mor, Swindon / Großbritannien                          | 10 <sup>6</sup>       |
| Archimede Solar Energy S.p.A., Massa Martana / Italien                                      | 46                    |
| Cremona Engineering S.r.l., Cremona / Italien                                               | 50 <sup>a</sup>       |
| E-Utile S.p.A., Mailand / Italien                                                           | 51 <sup>4</sup>       |
| Transfima GEIE, Turin / Italien                                                             | 42 <sup>a</sup>       |
| Transfima S.p.A., Mailand / Italien                                                         | 49 <sup>a</sup>       |
| Turboservice Torino S.p.A., Turin / Italien                                                 | 50 <sup>a</sup>       |
| VAL 208 Torino GEIE, Mailand / Italien                                                      | 86 <sup>4,8</sup>     |
| SIA Ekogaisma, Riga / Lettland                                                              | 33 <sup>a</sup>       |
| Solutions & Infrastructure Services Limited, Gzira / Malta                                  | 50                    |
| Eemsmond Energie B.V., Amsterdam / Niederlande                                              | 50 <sup>a</sup>       |
| Enterprise Networks Holdings B.V., Amsterdam / Niederlande                                  | 49                    |
| Infraspeed Maintenance B.V., Zoetermeer / Niederlande                                       | 46 <sup>a</sup>       |
| Nokia Siemens Networks Holding B.V., Amsterdam / Niederlande                                | 50                    |
| Ural Locomotives Holding Besloten Venootschap, Den Haag / Niederlande                       | 49                    |
| Wirescan AS, Halden / Norwegen                                                              | 31                    |

- 6 Maßgeblicher Einfluss durch vertragliche Gestaltungen bzw. rechtliche Umstände.
- 7 Verzicht auf die Einbeziehung in den Konzernabschluss wegen untergeordneter Bedeutung.
- 8 Verzicht auf die Equityfortschreibung wegen untergeordneter Bedeutung.
- 9 Befreiung gemäß § 264b HGB.
- 10 Befreiung gemäß § 264 Abs. 3 HGB.

| Stand 30.09.2010                                                                                              | Kapitalanteil<br>in % |
|---------------------------------------------------------------------------------------------------------------|-----------------------|
| »smart technologies« Management-Beratungs- und Beteiligungsgesellschaft m.b.H., Wien/Österreich               | 26                    |
| AHC Austrian Health Care Systems & Engineering GmbH, Wien/Österreich                                          | 33 <sup>8</sup>       |
| Archivium Dokumentenarchiv Gesellschaft m.b.H., Wien/Österreich                                               | 50                    |
| CYBERDOC Gesellschaft für Digitale Kommunikation im Notariat GmbH, Wien/Österreich                            | 50 <sup>8</sup>       |
| CYBERDOC Gesellschaft für Digitale Kommunikation im Notariat GmbH & Co KG, Wien/Österreich                    | 50                    |
| DURATION plus, Wien/Österreich                                                                                | 9 <sup>6</sup>        |
| ELIN GmbH, Wien/Österreich                                                                                    | 50 <sup>8</sup>       |
| ELIN GmbH & Co KG, Linz/Österreich                                                                            | 50                    |
| Innovest Cash Beta Plus, Wien/Österreich                                                                      | 16 <sup>6</sup>       |
| Innovest Cash Duration Plus, Wien/Österreich                                                                  | 21                    |
| Innovest Cash Neutral Equity, Wien/Österreich                                                                 | 21                    |
| INNOVEST Cash premium, Wien/Österreich                                                                        | 24                    |
| Kompetenzzentrum Licht GmbH Innsbruck, Innsbruck/Österreich                                                   | 33 <sup>8</sup>       |
| Siemens Bacon GmbH, Wien/Österreich                                                                           | 50 <sup>8</sup>       |
| Siemens Bacon GmbH & Co KG, Wien/Österreich                                                                   | 50                    |
| Siemens Convertibles Emerging Markets, Wien/Österreich                                                        | 16 <sup>6</sup>       |
| Siemens Convertibles Global Markets, Wien/Österreich                                                          | 8 <sup>6</sup>        |
| Siemens Equity North America, Wien/Österreich                                                                 | 6 <sup>6</sup>        |
| Siemens Equity Pacific-RIM, Wien/Österreich                                                                   | 7 <sup>6</sup>        |
| Siemens Equity Western Europe, Wien/Österreich                                                                | 5 <sup>6</sup>        |
| Siemens Global Bonds, Wien/Österreich                                                                         | 9 <sup>6</sup>        |
| Siemens Global Corporate Bonds, Wien/Österreich                                                               | 9 <sup>6</sup>        |
| Siemens Innovest Beta Plus, Wien/Österreich                                                                   | 33                    |
| Siemens Rich & Liquid, Wien/Österreich                                                                        | 14 <sup>6</sup>       |
| Siemens S3, Wien/Österreich                                                                                   | 28                    |
| Siemens S5, Wien/Österreich                                                                                   | 19 <sup>6</sup>       |
| vatron gmbh, Linz/Österreich                                                                                  | 29                    |
| MTS – Metro, Transportes do Sul S.A., Lissabon/Portugal                                                       | 21 <sup>8</sup>       |
| Northern Capital Express (Express Severnoy Stolitsy), Moskau/Russische Föderation                             | 25 <sup>8</sup>       |
| OOO FuchsMetmasch, Cherepovets/Russische Föderation                                                           | 40 <sup>8</sup>       |
| OOO Interturbo, St. Petersburg/Russische Föderation                                                           | 45 <sup>8</sup>       |
| OOO Transconverter, Moskau/Russische Föderation                                                               | 35 <sup>8</sup>       |
| OOO VIS Automation mit Zusatz »Ein Gemeinschaftsunternehmen von VIS und Siemens«, Moskau/Russische Föderation | 49                    |
| ZAO Interautomatika, Moskau/Russische Föderation                                                              | 46                    |
| ZAO Nuclearcontrol, Moskau/Russische Föderation                                                               | 40 <sup>8</sup>       |

- 1 Beherrschender Einfluss durch Stimmrechtsmehrheit.
- 2 Beherrschender Einfluss durch vertragliche Gestaltungen.
- 3 Beherrschender Einfluss durch wirtschaftliche Umstände.
- 4 Fehlender beherrschender Einfluss durch vertragliche Gestaltungen bzw. rechtliche Umstände.
- 5 Fehlender maßgeblicher Einfluss durch vertragliche Gestaltungen bzw. rechtliche Umstände.

| Stand 30.09.2010                                            | Kapitalanteil<br>in % |
|-------------------------------------------------------------|-----------------------|
| ZAO Systema-Service, St. Petersburg/Russische Föderation    | 26                    |
| Certas AG, Zürich/Schweiz                                   | 50                    |
| Interessengemeinschaft TUS, Männedorf/Schweiz               | 50                    |
| EKOSIJ d.o.o., Ljubljana/Slowenien                          | 25 <sup>8</sup>       |
| Desarrollo de Aplicaciones Especiales S.A., Madrid/Spainien | 39                    |
| Merida Power, S.L., Madrid/Spainien                         | 50 <sup>8</sup>       |
| Nertus Mantenimiento Ferroviario S.A., Barcelona/Spainien   | 51 <sup>4</sup>       |
| Soleval Renovables S.L., Sevilla/Spainien                   | 50                    |
| Solucia Renovables 1, S.L., Lebrija (Sevilla)/Spainien      | 50                    |
| Termica AFAP S.A., Villacanas/Spainien                      | 20 <sup>8</sup>       |
| EKOLAMP s.r.o., Prag/Tschechische Republik                  | 30 <sup>8</sup>       |
| Meomed s.r.o., Prerov/Tschechische Republik                 | 47 <sup>8</sup>       |
| South Energia Zrt., Szeged/Ungarn                           | 50                    |

#### Amerika (30 Gesellschaften)

|                                                                                                                             |                   |
|-----------------------------------------------------------------------------------------------------------------------------|-------------------|
| Metronec S.A. – Siemens IT solutions & Services S.A. – Indra SI S.A. Union transitoria de empresa, Buenos Aires/Argentinien | 24                |
| Metronec S.A. – Siemens IT solutions & Services S.A. Union transitoria de empresas, Buenos Aires/Argentinien                | 30                |
| Sistemas Catastrales S.A., Buenos Aires/Argentinien                                                                         | 50                |
| UTE Salta, Salta/Argentinien                                                                                                | 50                |
| UTE Transito, Buenos Aires/Argentinien                                                                                      | 65 <sup>4</sup>   |
| CVL Componentes de Vidro Ltda., Caçapava/Brasilien                                                                          | 50                |
| innotec do Brasil Ltda., São Paulo/Brasilien                                                                                | 21 <sup>8</sup>   |
| PowerU International Ltd., George Town/Kaimaninseln                                                                         | 22                |
| Union Temporal Recaudo y Tecnologia, Cali/Kolumbien                                                                         | 20                |
| Pemopro S.A. de C.V., Mexiko D.F./Mexiko                                                                                    | 25 <sup>8</sup>   |
| Brockton Power Company LLC, Boston, MA/USA                                                                                  | 23                |
| Brockton Power Holdings Inc., Boston, MA/USA                                                                                | 25 <sup>8</sup>   |
| Brockton Power Properties, Inc., Boston, MA/USA                                                                             | 25 <sup>8</sup>   |
| Cyclos Semiconductor, Inc., Berkeley, CA/USA                                                                                | 41                |
| Hear USA, Inc., West Palm Beach/USA                                                                                         | 14 <sup>6,8</sup> |
| NetCrystal Inc., Mountain View, CA/USA                                                                                      | 21                |
| Panoratio Database Holding Incorporation, San Francisco, CA/USA                                                             | 36 <sup>8</sup>   |
| PHSITH LLC, New Castle, DE/USA                                                                                              | 33                |
| Prenova, Inc., Marietta, GA/USA                                                                                             | 22 <sup>8</sup>   |
| Progressive Cooling Solutions, Inc., Berkeley/USA                                                                           | 40 <sup>8</sup>   |
| Reactive NanoTechnologies, Inc., Hunt Valley, MD/USA                                                                        | 21                |
| Rether networks, Inc., Centereach, NY/USA                                                                                   | 30                |
| Siemens First Capital Commercial Finance, LLC, Oklahoma City, OK/USA                                                        | 51 <sup>4</sup>   |
| TORP Terminal L.P., Houston, TX/USA                                                                                         | 30                |

- 6 Maßgeblicher Einfluss durch vertragliche Gestaltungen bzw. rechtliche Umstände.
- 7 Verzicht auf die Einbeziehung in den Konzernabschluss wegen untergeordneter Bedeutung.
- 8 Verzicht auf die Equityfortschreibung wegen untergeordneter Bedeutung.
- 9 Befreiung gemäß § 264b HGB.
- 10 Befreiung gemäß § 264 Abs. 3 HGB.

| Stand 30.09.2010                                                       | Kapitalanteil<br>in % |
|------------------------------------------------------------------------|-----------------------|
| Treated Water Outsourcing J.V., Naperville, IL/USA                     | 50                    |
| Valeo Sylvania LLC, Seymour, IN/USA                                    | 50                    |
| WhoGlue, Inc., Baltimore, MD/USA                                       | 33 <sup>8</sup>       |
| XinRay Systems, LLC, Research Triangle Park, NC/USA                    | 50 <sup>8</sup>       |
| Zargis Medical Corp., Princeton, NJ/USA                                | 25                    |
| Innovex Capital En Tecnologia, C.A., Caracas/Venezuela                 | 20                    |
| <b>Asien (32 Gesellschaften)</b>                                       |                       |
| Oil and Gas ProServ LLC, Baku/Aserbaidshjan                            | 25 <sup>8</sup>       |
| Foshan Electrical and Lighting Co., Ltd., Foshan/China                 | 13 <sup>6</sup>       |
| GIS Steel & Aluminum Products Co., Ltd. Hangzhou, Hangzhou/China       | 25                    |
| GSP China Technology Co., Ltd., Beijing/China                          | 50                    |
| Guangzhou Morgan Seals Co., Ltd., Guangzhou/China                      | 50 <sup>8</sup>       |
| Newcom Traffic Technology Co., Ltd., Beijing/China                     | 23                    |
| OSRAM (China) Fluorescent Materials Co., Ltd., Yi Xing City/China      | 50 <sup>4</sup>       |
| Saitong Railway Electrification (Nanjing) Co., Ltd., Nanjing/China     | 50 <sup>8</sup>       |
| Shanghai Advanced Power Projects Co. Ltd., Shanghai/China              | 35 <sup>8</sup>       |
| Shanghai Electric Power Generation Equipment Co., Ltd., Shanghai/China | 40                    |
| Siemens Traction Equipment Ltd., Zhuzhou, Zhuzhou/China                | 50                    |
| Yangtze Delta Manufacturing Co. Ltd., Hangzhou, Hangzhou/China         | 51 <sup>4</sup>       |
| Zhenjiang Siemens Busbar Trunking Systems Co. Ltd., Yangzhong/China    | 50                    |
| OSRAM Prosperity Company Ltd., Hongkong/Hongkong                       | 50                    |
| Bangalore International Airport Ltd., Bengaluru/Indien                 | 40                    |

- 1 Beherrschender Einfluss durch Stimmrechtsmehrheit.
- 2 Beherrschender Einfluss durch vertragliche Gestaltungen.
- 3 Beherrschender Einfluss durch wirtschaftliche Umstände.
- 4 Fehlender beherrschender Einfluss durch vertragliche Gestaltungen bzw. rechtliche Umstände.
- 5 Fehlender maßgeblicher Einfluss durch vertragliche Gestaltungen bzw. rechtliche Umstände.

| Stand 30.09.2010                                                   | Kapitalanteil<br>in % |
|--------------------------------------------------------------------|-----------------------|
| Torrent Power Services Pvt. Ltd., Ahmadabad/Indien                 | 50 <sup>8</sup>       |
| P.T. Jawa Power, Jakarta/Indonesien                                | 50                    |
| LAMP NOOR (P.J.S.) Co., Saveh/Iran                                 | 20 <sup>8</sup>       |
| Arava Power Company Ltd., D.N. Eilat/Israel                        | 40 <sup>8</sup>       |
| Global Sun Israel, L.P., D.N. Eilat/Israel                         | 38                    |
| Metropolitan Transportation Solutions Ltd., Rosh Haya'in/Israel    | 20 <sup>8</sup>       |
| Kanto Hochouki, Ibaragi/Japan                                      | 25 <sup>8</sup>       |
| Kikoeno Soudanshitsu, Tochigi/Japan                                | 50 <sup>8</sup>       |
| Mitsubishi Electric OSRAM Ltd., Yokohama/Japan                     | 49                    |
| TLT OSRAM-Melco Lighting Ltd., Yokosuka/Japan                      | 50 <sup>8</sup>       |
| Yaskawa Siemens Automation & Drives Corp., Kitakyushu/Japan        | 50                    |
| Rousch (Pakistan) Power Ltd., Karachi/Pakistan                     | 26                    |
| Arabia Electric Ltd. (Under Liquidation), Jeddah/Saudi-Arabien     | 30 <sup>8</sup>       |
| The Gulf Reyrolle Ltd., Al Khobar/Saudi-Arabien                    | 49 <sup>8</sup>       |
| Power Automation Pte. Ltd., Singapur/Singapur                      | 49                    |
| Modern Engineering and Consultants Co. Ltd., Bangkok/Thailand      | 40 <sup>8</sup>       |
| Siemens Transformers L.L.C, Abu Dhabi/Vereinigte Arabische Emirate | 49                    |
| <b>Afrika (3 Gesellschaften)</b>                                   |                       |
| Energie Electrique de Tahaddart S.A., Tanger/Marokko               | 20                    |
| VOEST-ALPINE Technical Services Ltd., Abuja/Nigeria                | 40 <sup>8</sup>       |
| Impilo Consortium (Pty.) Ltd., La Lucia/Südafrika                  | 31                    |
| <b>Australien/Neuseeland/Ozeanien (1 Gesellschaft)</b>             |                       |
| SILCAR Pty. Ltd., Glen Iris/Australien                             | 50                    |

- 6 Maßgeblicher Einfluss durch vertragliche Gestaltungen bzw. rechtliche Umstände.
- 7 Verzicht auf die Einbeziehung in den Konzernabschluss wegen untergeordneter Bedeutung.
- 8 Verzicht auf die Equityfortschreibung wegen untergeordneter Bedeutung.
- 9 Befreiung gemäß § 264b HGB.
- 10 Befreiung gemäß § 264 Abs. 3 HGB.

Stand 30.09.2010

|                                                                                                              | Kapitalanteil<br>in % | Erg. n. St.<br>in Mio. EUR | Eigenkapital<br>in Mio. EUR |
|--------------------------------------------------------------------------------------------------------------|-----------------------|----------------------------|-----------------------------|
| <b>Sonstige Beteiligungen<sup>11</sup></b>                                                                   |                       |                            |                             |
| <b>Deutschland (11 Gesellschaften)</b>                                                                       |                       |                            |                             |
| Ausbildungszentrum für Technik, Informationsverarbeitung und Wirtschaft gemeinnützige GmbH (ATIW), Paderborn | 100 <sup>4,5</sup>    | 0                          | 2                           |
| BSAV Kapitalbeteiligungen und Vermögensverwaltungs Management GmbH, Grünwald                                 | 100 <sup>4,5</sup>    | 0                          | 12                          |
| IBS AG, Höhr-Grenzhausen                                                                                     | 8                     | 1                          | 12                          |
| Kyros Beteiligungsverwaltung GmbH, Grünwald                                                                  | 100 <sup>4,5</sup>    | - 26                       | 145                         |
| PT Kapitalanlagen und Vermögensverwaltungs Management GmbH, Grünwald                                         | 100 <sup>4,5</sup>    | 0                          | 0                           |
| Realtime Technology AG, München                                                                              | 9                     | 3                          | 18                          |
| Siemens Pensionsfonds AG, Grünwald                                                                           | 100 <sup>4,5</sup>    | - 1                        | 8                           |
| Siemens Venture Capital Fund 1 GmbH, München                                                                 | 100 <sup>4,5</sup>    | 0                          | 12                          |
| Siemens Venture Capital Fund 2 GmbH, München                                                                 | 100 <sup>4,5</sup>    | 0                          | 0                           |
| SIM 9. Grundstücksverwaltungs- und -beteiligungs-GmbH, München                                               | 100 <sup>4,5</sup>    | - 9                        | 11                          |
| Unterstützungskasse der VDO Mess- und Regeltechnik GmbH, Schwalbach am Taunus                                | 100 <sup>4,5</sup>    | 0                          | 0                           |
| <b>Europa (ohne Deutschland) (5 Gesellschaften)</b>                                                          |                       |                            |                             |
| AREVA NP S.A.S., Courbevoie / Frankreich                                                                     | 34 <sup>5</sup>       | - 152                      | 87                          |
| EDAP TMS S.A., Lyon / Frankreich                                                                             | 7                     | 8                          | 13                          |
| Medical Systems S.p.A., Genova / Italien                                                                     | 45 <sup>5</sup>       | 13                         | 49                          |
| Corporate XII S.A. (SICAV-FIS), Luxembourg / Luxemburg                                                       | 100 <sup>4,5</sup>    | 230                        | 6.393                       |
| OAQ Power Machines, Moskau / Russische Föderation                                                            | 25 <sup>5</sup>       | 139                        | 2                           |
| <b>Amerika (4 Gesellschaften)</b>                                                                            |                       |                            |                             |
| Conproca S.A. de C.V., Mexiko D.F. / Mexiko                                                                  | 15                    | - 5                        | - 74                        |
| Global Healthcare Exchange LLC, Westminster, CO / USA                                                        | 7                     | 8                          | 72                          |
| iBAHN, South Jordan, UT / USA                                                                                | 9                     | - 1                        | 34                          |
| Longview Intermediate Holdings B, LLC, Greenwich / USA                                                       | 11                    | 44                         | 268                         |

- 1 Beherrschender Einfluss durch Stimmrechtsmehrheit.
- 2 Beherrschender Einfluss durch vertragliche Gestaltungen.
- 3 Beherrschender Einfluss durch wirtschaftliche Umstände.
- 4 Fehlender beherrschender Einfluss durch vertragliche Gestaltungen bzw. rechtliche Umstände.
- 5 Fehlender maßgeblicher Einfluss durch vertragliche Gestaltungen bzw. rechtliche Umstände.

- 6 Maßgeblicher Einfluss durch vertragliche Gestaltungen bzw. rechtliche Umstände.
- 7 Verzicht auf die Einbeziehung in den Konzernabschluss wegen untergeordneter Bedeutung.
- 8 Verzicht auf die Equityfortschreibung wegen untergeordneter Bedeutung.
- 9 Befreiung gemäß § 264b HGB.
- 10 Befreiung gemäß § 264 Abs. 3 HGB.
- 11 Werte gemäß letztem verfügbaren Jahresabschluss, dem ein vom Siemens-Geschäftsjahr abweichendes Geschäftsjahr zugrunde liegen kann.

## Dr. iur. Gerhard Cromme

Vorsitzender  
Vorsitzender des Aufsichtsrats der Siemens AG und der ThyssenKrupp AG  
Geburtsdatum: 25.02.1943  
Mitglied seit: 23.01.2003  
Externe Mandate  
Deutsche Aufsichtsratsmandate:  
Allianz SE, München  
(stellv. Vorsitz)  
Axel Springer AG, Berlin  
ThyssenKrupp AG, Duisburg und Essen  
(Vorsitz)  
Auslandsmandate:  
Compagnie de Saint-Gobain S.A., Frankreich

## Berthold Huber\*

1. stellv. Vorsitzender  
1. Vorsitzender der IG Metall  
Geburtsdatum: 15.02.1950  
Mitglied seit: 01.07.2004  
Externe Mandate  
Deutsche Aufsichtsratsmandate:  
Audi AG, Ingolstadt  
(stellv. Vorsitz)  
Porsche Automobil Holding SE, Stuttgart

## Dr. oec. Josef Ackermann

2. stellv. Vorsitzender  
Vorsitzender des Vorstands und des Group Executive Committee der Deutsche Bank AG  
Geburtsdatum: 07.02.1948  
Mitglied seit: 23.01.2003  
Externe Mandate  
Auslandsmandate:  
Belenos Clean Power Holding Ltd., Schweiz  
(stellv. Vorsitz)  
Royal Dutch Shell plc, Niederlande  
Zurich Financial Services AG, Schweiz  
(stellv. Vorsitz)

## Lothar Adler\*

Vorsitzender des Gesamtbetriebsrats der Siemens AG  
Geburtsdatum: 22.02.1949  
Mitglied seit: 23.01.2003

## Jean-Louis Beffa

Aufsichtsratsmitglied  
Geburtsdatum: 11.08.1941  
Mitglied seit: 24.01.2008  
Externe Mandate  
Auslandsmandate:  
Claude Bernard Participations SAS, Frankreich  
(Vorsitz)  
Compagnie de Saint-Gobain S.A., Frankreich  
GDF SUEZ S.A., Frankreich  
Groupe Bruxelles Lambert, Belgien  
JL2B Conseil, Frankreich  
(Vorsitz)  
Le Monde S.A., Frankreich  
Le Monde & Partenaires Associés S.A.S., Frankreich  
Saint-Gobain Corporation, USA  
Société Editrice du Monde S.A., Frankreich

## Gerd von Brandenstein

Diplom-Volkswirt  
Geburtsdatum: 06.04.1942  
Mitglied seit: 24.01.2008  
Externe Mandate  
Deutsche Aufsichtsratsmandate:  
degewo Aktiengesellschaft, Berlin

## Michael Diekmann

Vorstandsvorsitzender der Allianz SE  
Geburtsdatum: 23.12.1954  
Mitglied seit: 24.01.2008  
Externe Mandate  
Deutsche Aufsichtsratsmandate:  
Allianz Deutschland AG, München  
Allianz Global Investors AG, München  
(Vorsitz)  
BASF SE, Ludwigshafen am Rhein  
(stellv. Vorsitz)  
Linde AG, München  
(stellv. Vorsitz)  
Auslandsmandate:  
Allianz France SA, Frankreich  
(stellv. Vorsitz)  
Allianz S.p.A., Italien

## Dr. iur. Hans Michael Gaul

Aufsichtsratsmitglied  
Geburtsdatum: 02.03.1942  
Mitglied seit: 24.01.2008  
Externe Mandate  
Deutsche Aufsichtsratsmandate:  
Evonik Industries AG, Essen  
EWE Aktiengesellschaft, Oldenburg  
HSBC Trinkaus & Burkhardt AG, Düsseldorf  
IVG Immobilien AG, Bonn  
VNG-Verbundnetz Gas AG, Leipzig  
Volkswagen AG, Wolfsburg

## Prof. Dr. rer. nat. Peter Gruss

Präsident der Max-Planck-Gesellschaft zur Förderung der Wissenschaften e.V.  
Geburtsdatum: 28.06.1949  
Mitglied seit: 24.01.2008  
Externe Mandate  
Deutsche Aufsichtsratsmandate:  
Münchener Rückversicherungs-Gesellschaft Aktiengesellschaft in München, München

## Bettina Haller\*

Vorsitzende des Konzernbetriebsrats der Siemens AG  
Geburtsdatum: 14.03.1959  
Mitglied seit: 01.04.2007

## Hans-Jürgen Hartung\*

Vorsitzender des Betriebsrats Siemens Energy – Standort Erlangen  
Geburtsdatum: 10.03.1952  
Mitglied seit: 27.01.2009

## Harald Kern\*

Mitglied des Gesamtbetriebsrats der Siemens AG; stellv. Vorsitzender des Siemens Europabetriebsrats  
Geburtsdatum: 16.03.1960  
Mitglied seit: 24.01.2008

## Dr. phil. Nicola Leibinger-Kammüller

Geschäftsführende Gesellschafterin und Vorsitzende der Geschäftsführung der TRUMPF GmbH + Co. KG  
Geburtsdatum: 15.12.1959  
Mitglied seit: 24.01.2008  
Externe Mandate  
Deutsche Aufsichtsratsmandate:  
Axel Springer AG, Berlin  
Deutsche Lufthansa AG, Köln  
Voith AG, Heidenheim an der Brenz

### Werner Mönius\*

Vorsitzender des  
Siemens Europabetriebsrats  
Geburtsdatum: 16. 05.1954  
Mitglied seit: 24. 01.2008

### Håkan Samuelsson

Aufsichtsratsmitglied  
Geburtsdatum: 19. 03.1951  
Mitglied seit: 24. 01.2008  
Externe Mandate  
Deutsche Aufsichtsratsmandate:  
Scandferries Holding GmbH, Rostock  
(Vorsitz)<sup>1</sup>  
Scandlines GmbH, Rostock  
(Vorsitz)  
Auslandsmandate:  
Volvo Car Corporation, Schweden

### Dieter Scheitor\*

Diplom-Physiker  
Unternehmensbeauftragter  
der IG Metall für Siemens  
Geburtsdatum: 23.11.1950  
Mitglied seit: 25. 01.2007

### Dr. iur. Rainer Sieg\*

Vorsitzender des Siemens-Konzern-  
sprecherausschusses und des Gesamt-  
sprecherausschusses der Siemens AG  
Geburtsdatum: 20.12.1948  
Mitglied seit: 24. 01.2008

### Birgit Steinborn\*

stellv. Vorsitzende des  
Gesamtbetriebsrats der Siemens AG  
Geburtsdatum: 26. 03.1960  
Mitglied seit: 24. 01.2008

### Lord Iain Vallance of Tummel

Chairman, Amsphere Ltd.  
Geburtsdatum: 20. 05.1943  
Mitglied seit: 23. 01.2003

### Sibylle Wankel\*

Juristin in der Bezirksleitung Bayern  
der IG Metall  
Geburtsdatum: 03. 03.1964  
Mitglied seit: 01. 04.2009  
Externe Mandate  
Deutsche Aufsichtsratsmandate:  
Vaillant GmbH, Remscheid  
ZEPPELIN GmbH, Friedrichshafen

<sup>1</sup> Beirat als vergleichbares Kontrollgremium

Der Aufsichtsrat der Siemens AG umfasst 20 Mitglieder. Er ist gemäß dem deutschen Mitbestimmungsgesetz zu gleichen Teilen mit Aktionärs- und Arbeitnehmervertretern besetzt. In der Hauptversammlung vom 24. Januar 2008 wählten die Aktionäre die Vertreter der Anteilseigner. Die durch \* kenntlich gemachten Vertreter der Arbeitnehmer wurden am 27. September 2007 mit Wirkung ab Beendigung der Hauptversammlung vom 24. Januar 2008 nach den Bestimmungen des Mitbestimmungsgesetzes zu Mitgliedern des Aufsichtsrats gewählt beziehungsweise sind für ausgeschiedene Arbeitnehmervertreter in den Aufsichtsrat nachgerückt. Die Amtsperiode des Aufsichtsrats beträgt fünf Jahre.

Stand: 30. 09. 2010



## Ausschüsse des Aufsichtsrats

Der Aufsichtsrat der Siemens AG hat sechs Ausschüsse eingerichtet. Über die konkrete Ausschussarbeit im vergangenen Geschäftsjahr informiert der Bericht des Aufsichtsrats auf den Seiten 6 ff.

| Ausschüsse                     | Sitzungen im Geschäftsjahr 2010           | Aufgaben                                                                                                                                                                                                                                                                                                                                                                                                                                                                                                                                                                                                                                                                                                                                                                                                                 | Mitglieder zum 30.09.2010                                                                                                                                                                 |
|--------------------------------|-------------------------------------------|--------------------------------------------------------------------------------------------------------------------------------------------------------------------------------------------------------------------------------------------------------------------------------------------------------------------------------------------------------------------------------------------------------------------------------------------------------------------------------------------------------------------------------------------------------------------------------------------------------------------------------------------------------------------------------------------------------------------------------------------------------------------------------------------------------------------------|-------------------------------------------------------------------------------------------------------------------------------------------------------------------------------------------|
| <b>Aufsichtsrats-Präsidium</b> | 7<br>4 Beschlüsse im schriftlichen Umlauf | Das Präsidium befasst sich insbesondere mit Vorstandsangelegenheiten; es unterbreitet dem Aufsichtsrat Vorschläge für die Bestellung und Abberufung von Vorstandsmitgliedern und bereitet die Beschlussfassung des Aufsichtsratsplenums über das Vergütungssystem für den Vorstand sowie über die Festsetzung der Gesamtbezüge des einzelnen Vorstandsmitglieds vor. Im Rahmen dieser Beschlussfassung des Aufsichtsratsplenums schließt das Präsidium die Anstellungsverträge mit den Vorstandsmitgliedern ab. Das Präsidium unterbreitet dem Aufsichtsrat Vorschläge für die Besetzung von Aufsichtsratsausschüssen. Es entscheidet über die Zustimmung zu Geschäften mit Vorstandsmitgliedern und den ihnen nahestehenden Personen und Unternehmen. Das Präsidium befasst sich zudem mit Corporate-Governance-Fragen. | Dr. iur. Gerhard Cromme (Vorsitzender)<br>Lothar Adler<br>Dr. oec. Josef Ackermann<br>Berthold Huber                                                                                      |
| <b>Prüfungsausschuss</b>       | 6                                         | Dem Prüfungsausschuss obliegen insbesondere die Vorbereitung der Jahres- und Konzernabschlussprüfung durch den Aufsichtsrat, die Erörterung der Quartalsabschlüsse und des Halbjahresfinanzberichts, die Gestaltung der Beziehungen zum Abschlussprüfer (insbesondere Auftragserteilung, Festlegung der Prüfungsschwerpunkte und des Prüfungshonorars sowie die Kontrolle der Unabhängigkeit) und die Überwachung der Wirksamkeit des internen Kontrollsystems, des Risikomanagementsystems und des internen Revisionsystems.                                                                                                                                                                                                                                                                                            | Dr. iur. Hans Michael Gaul <sup>1,2</sup> (Vorsitzender)<br>Dr. iur. Gerhard Cromme <sup>1</sup><br>Bettina Haller<br>Dieter Scheitor<br>Birgit Steinborn<br>Lord Iain Vallance of Tummel |
| <b>Compliance-Ausschuss</b>    | 5                                         | Dem Compliance-Ausschuss obliegt insbesondere die Überwachung der Einhaltung von Rechtsvorschriften, behördlichen Regelungen und der unternehmensinternen Richtlinien durch das Unternehmen (Compliance).                                                                                                                                                                                                                                                                                                                                                                                                                                                                                                                                                                                                                | Dr. iur. Gerhard Cromme (Vorsitzender)<br>Lothar Adler<br>Dr. iur. Hans Michael Gaul<br>Bettina Haller<br>Lord Iain Vallance of Tummel<br>Sibylle Wankel                                  |

<sup>1</sup> Finanzexperte (Audit Committee Financial Expert) im Sinne des Sarbanes-Oxley Act.  
<sup>2</sup> Erfüllt die Anforderungen gem. §§ 100 Abs. 5, 107 Abs. 4 AktG.

| Ausschüsse                                                            | Sitzungen im Geschäftsjahr 2010           | Aufgaben                                                                                                                                                                                                                                                                                                                                                                                                                                                                                                                                                                                                                                                                                                                                                                                                                                                                                                                                                                                            | Mitglieder zum 30.09.2010                                                                                                                                                       |
|-----------------------------------------------------------------------|-------------------------------------------|-----------------------------------------------------------------------------------------------------------------------------------------------------------------------------------------------------------------------------------------------------------------------------------------------------------------------------------------------------------------------------------------------------------------------------------------------------------------------------------------------------------------------------------------------------------------------------------------------------------------------------------------------------------------------------------------------------------------------------------------------------------------------------------------------------------------------------------------------------------------------------------------------------------------------------------------------------------------------------------------------------|---------------------------------------------------------------------------------------------------------------------------------------------------------------------------------|
| Finanz- und Investitionsausschuss                                     | 2<br>2 Beschlüsse im schriftlichen Umlauf | Der Finanz- und Investitionsausschuss hat die Aufgabe, auf der Grundlage der Gesamtstrategie des Unternehmens, die Gegenstand einer jährlichen Strategiesitzung des Aufsichtsrats ist, die Verhandlungen und Beschlüsse des Aufsichtsrats über die finanzielle Lage und Ausstattung der Gesellschaft sowie über Sach- und Finanzinvestitionen vorzubereiten. Darüber hinaus beschließt der Finanz- und Investitionsausschuss anstelle des Aufsichtsrats über die Zustimmung zu zustimmungspflichtigen Geschäften und Maßnahmen, soweit nicht der Betrag von 600 Mio. EUR erreicht ist. Der Finanz- und Investitionsausschuss nimmt ferner die Rechte des Aufsichtsrats gemäß § 32 des Mitbestimmungsgesetzes – Beschlussfassung über die Ausübung von Beteiligungsrechten – wahr. Beschlüsse des Finanz- und Investitionsausschusses nach § 32 des Mitbestimmungsgesetzes werden gemäß § 32 Absatz 1 Satz 2 des Mitbestimmungsgesetzes nur mit den Stimmen der Vertreter der Anteilseigner gefasst. | Dr. iur. Gerhard Cromme (Vorsitzender)<br>Lothar Adler<br>Jean-Louis Beffa<br>Gerd von Brandenstein<br>Werner Mönius<br>Håkan Samuelsson<br>Dieter Scheitor<br>Birgit Steinborn |
| Nominierungsausschuss                                                 | 0                                         | Der Nominierungsausschuss schlägt dem Aufsichtsrat für dessen Wahlvorschläge an die Hauptversammlung geeignete Kandidaten vor.                                                                                                                                                                                                                                                                                                                                                                                                                                                                                                                                                                                                                                                                                                                                                                                                                                                                      | Dr. iur. Gerhard Cromme (Vorsitzender)<br>Dr. oec. Josef Ackermann<br>Dr. iur. Hans Michael Gaul                                                                                |
| Vermittlungsausschuss<br>§§ 27 Abs. 3,<br>31 Abs. 3 und<br>5 MitbestG | 0                                         | Der gesetzlich zu bildende Vermittlungsausschuss unterbreitet dem Aufsichtsrat Vorschläge für die Bestellung beziehungsweise den Widerruf der Bestellung von Vorstandsmitgliedern, wenn im ersten Wahlgang die erforderliche Mehrheit von zwei Dritteln der Stimmen der Aufsichtsratsmitglieder nicht erreicht wird.                                                                                                                                                                                                                                                                                                                                                                                                                                                                                                                                                                                                                                                                                | Dr. iur. Gerhard Cromme (Vorsitzender)<br>Lothar Adler<br>Dr. oec. Josef Ackermann<br>Berthold Huber                                                                            |

Nähere Informationen zum Thema Corporate Governance bei Siemens finden Sie im Internet unter:  
[www.siemens.de/corporate-governance](http://www.siemens.de/corporate-governance)

## Peter Löscher

Vorsitzender des Vorstands  
der Siemens AG

Geburtsdatum: 17. 09.1957  
Erste Bestellung: 01. 07. 2007  
Bestellt bis: 31. 03. 2012

Externe Mandate

Deutsche Aufsichtsratsmandate:  
Münchener Rückversicherungs-  
Gesellschaft Aktiengesellschaft  
in München, München

## Wolfgang Dehen

Geburtsdatum: 09. 02. 1954  
Erste Bestellung: 01. 01. 2008  
Bestellt bis: 31. 03. 2012

Externe Mandate

Deutsche Aufsichtsratsmandate:  
TÜV Süd AG, München

Konzernmandate

Auslandsmandate:  
Siemens Ltd., China  
(Vorsitz)  
Siemens Ltd., Indien  
Siemens Pte. Ltd., Singapur

## Brigitte Ederer

(seit 01. 07. 2010)

Geburtsdatum: 27. 02. 1956  
Erste Bestellung: 01. 07. 2010  
Bestellt bis: 30. 06. 2015

Externe Mandate

Auslandsmandate:  
Boehringer Ingelheim RCV GmbH,  
Österreich  
Österreichische Industrieholding AG  
(ÖIAG), Österreich

Konzernmandate

Auslandsmandate:  
Siemens Aktiengesellschaft  
Österreich, Österreich  
(Vorsitz)  
Siemens France Holding S.A.S.,  
Frankreich  
Siemens Holding S.p.A., Italien  
(stellv. Vorsitz)  
Siemens Holdings plc, Großbritannien  
Siemens Nederland N.V., Niederlande  
(Vorsitz)  
Siemens S.A., Spanien  
(Vorsitz)  
Siemens Sanayi ve Ticaret A.Ş., Türkei  
Siemens S.p.A., Italien  
(stellv. Vorsitz)  
Siemens s.r.o., Tschechische Republik  
(Vorsitz)

## Dr.-Ing. Heinrich Hiesinger

(bis 30. 09. 2010)

Geburtsdatum: 25. 05. 1960  
Erste Bestellung: 01. 06. 2007  
Ursprünglich bestellt bis: 31. 03. 2012

Externe Mandate

Deutsche Aufsichtsratsmandate:  
Deutsche Messe Aktiengesellschaft,  
Hannover (bis 30. 06. 2010)  
INPRO Innovationsgesellschaft für  
fortgeschrittene Produktionssysteme  
in der Fahrzeugindustrie mbH, Berlin  
(bis 31. 12. 2009)

Konzernmandate (bis 30. 06. 2010)

Deutsche Aufsichtsratsmandate:  
OSRAM GmbH, München  
(Vorsitz)

Auslandsmandate:  
Siemens Industry Inc., USA  
(Vorsitz)  
Siemens Ltd., China  
Siemens Schweiz AG, Schweiz  
(Vorsitz)

## Joe Kaeser

Geburtsdatum: 23. 06. 1957  
Erste Bestellung: 01. 05. 2006  
Bestellt bis: 31. 03. 2016

Externe Mandate

Deutsche Aufsichtsratsmandate:  
Allianz Deutschland AG, München  
Bayerische Börse AG, München

Auslandsmandate:  
Enterprise Networks Holdings B.V.,  
Niederlande  
NXP Semiconductors N.V.,  
Niederlande

Konzernmandate

Deutsche Aufsichtsratsmandate:  
BSH Bosch und Siemens Hausgeräte  
GmbH, München

Auslandsmandate:  
Nokia Siemens Networks B.V.,  
Niederlande  
Siemens Aktiengesellschaft  
Österreich, Österreich  
Siemens Corp., USA  
(stellv. Vorsitz)  
Siemens Ltd., Indien

## Barbara Kux

Geburtsdatum: 26. 02. 1954  
Erste Bestellung: 17. 11. 2008  
Bestellt bis: 16. 11. 2013

Externe Mandate

Deutsche Aufsichtsratsmandate:  
ZF Friedrichshafen AG, Friedrichshafen

Auslandsmandate:  
Firmenich International SA, Schweiz  
(bis 12. 10. 2010)

## Prof. Dr. phil. nat. Hermann Requardt

Geburtsdatum: 11. 02. 1955  
Erste Bestellung: 01. 05. 2008  
Bestellt bis: 31. 03. 2016

Externe Mandate

Deutsche Aufsichtsratsmandate:  
Software Aktiengesellschaft,  
Darmstadt

Konzernmandate

Deutsche Aufsichtsratsmandate:  
BSH Bosch und Siemens Hausgeräte  
GmbH, München  
OSRAM GmbH, München

Auslandsmandate:  
Siemens Healthcare Diagnostics Inc.,  
USA  
Siemens Holding K.K., Japan  
(Vorsitz)  
Siemens Japan K.K., Japan  
(Vorsitz)  
Siemens Medical Solutions USA, Inc.,  
USA  
(Vorsitz)

## Prof. Dr.-Ing. Siegfried Russwurm

Geburtsdatum: 27.06.1963  
Erste Bestellung: 01.01.2008  
Bestellt bis: 31.03.2012

### Externe Mandate

Deutsche Aufsichtsratsmandate:  
Deutsche Messe Aktiengesellschaft,  
Hannover

### Konzernmandate

Deutsche Aufsichtsratsmandate:  
BSH Bosch und Siemens Hausgeräte  
GmbH, München  
OSRAM GmbH, München  
(Vorsitz)

### Auslandsmandate:

AEL(L) Ltd., Saudi-Arabien  
(stellv. Vorsitz)  
Nokia Siemens Networks B.V.,  
Niederlande  
Siemens Industry, Inc., USA  
(Vorsitz)  
Siemens Ltd., China  
Siemens Ltd., Saudi-Arabien  
(stellv. Vorsitz)  
Siemens Ltd., Südafrika  
(Vorsitz)  
Siemens Middle East, FZ-LLC,  
Vereinigte Arabische Emirate  
Siemens Schweiz AG, Schweiz  
(Vorsitz)  
VA TECH T & D Co. Ltd., Saudi Arabien

## Peter Y. Solmssen

Geburtsdatum: 24.01.1955  
Erste Bestellung: 01.10.2007  
Bestellt bis: 31.03.2012

### Konzernmandate

### Auslandsmandate:

Nokia Siemens Networks B.V.,  
Niederlande  
Siemens Canada Ltd., Kanada  
(Vorsitz)  
Siemens Corp., USA  
(Vorsitz)  
Siemens S.A., Kolumbien  
(Vorsitz)  
Siemens S.A. de C.V., Mexiko  
(Vorsitz)

## Ausschüsse des Vorstands

| Ausschuss                                     | Sitzungen im Geschäftsjahr 2010      | Aufgaben                                                                                                                                                                                                                                                                                                                                                                                                      | Mitglieder zum 30.09.2010                                                                                                             |
|-----------------------------------------------|--------------------------------------|---------------------------------------------------------------------------------------------------------------------------------------------------------------------------------------------------------------------------------------------------------------------------------------------------------------------------------------------------------------------------------------------------------------|---------------------------------------------------------------------------------------------------------------------------------------|
| Eigenkapital- und Belegschaftsaktienausschuss | 3 Beschlüsse im schriftlichen Umlauf | Dieser Ausschuss ist zuständig für die Ausnutzung von Genehmigten Kapitalia bei der Ausgabe von Belegschaftsaktien sowie für die Durchführung von diversen Kapitalmaßnahmen. Außerdem entscheidet er, in welchem Umfang und zu welchen Bedingungen aktienbasierte Vergütungskomponenten beziehungsweise Vergütungsprogramme für Mitarbeiter und Führungskräfte (mit Ausnahme des Vorstands) angeboten werden. | Peter Löscher (Vorsitzender)<br>Joe Kaeser<br>Prof. Dr.-Ing. Siegfried Russwurm (bis 30.06.2010)<br>Brigitte Ederer (seit 01.07.2010) |

Nähere Informationen zum Thema Corporate Governance bei Siemens finden Sie im Internet unter:  
[www.siemens.de/corporate-governance](http://www.siemens.de/corporate-governance)

# Weitere Informationen

---

---

|     |                                          |
|-----|------------------------------------------|
| 290 | Erklärung des Vorstands                  |
| 290 | Versicherung der gesetzlichen Vertreter  |
| 291 | Bestätigungsvermerk des Abschlussprüfers |
| 292 | Fünfjahresübersicht                      |
| 294 | Wichtige Begriffe und Abkürzungen        |
| 298 | Stichwortverzeichnis                     |
| 301 | Impressum                                |
| 303 | Unternehmensstruktur                     |



# Erklärung des Vorstands

Für die Aufstellung des Konzernabschlusses und des Konzernlageberichts ist der Vorstand der Siemens Aktiengesellschaft verantwortlich. Der Konzernabschluss wurde unter Beachtung der Grundsätze ordnungsmäßiger Buchführung erstellt und um international übliche Zusatzinformationen ergänzt. Der Konzernlagebericht steht mit dem Konzernabschluss in Einklang und ist mit dem Lagebericht der Siemens Aktiengesellschaft zusammengefasst.

Die bestehenden internen Kontrollsysteme und der Einsatz konzernweit einheitlicher Richtlinien sowie die Maßnahmen zur entsprechenden Aus- und Weiterbildung der Mitarbeiter sollen die Ordnungsmäßigkeit und die Übereinstimmung des Konzernabschlusses und des Konzernlageberichts mit den gesetzlichen Vorschriften gewährleisten. Wir haben von Mitgliedern des Managements der Sektoren, der Divisionen, der Sektorübergreifenden Geschäfte, der Sektorübergreifenden Dienstleistungen, der regionalen Cluster sowie bestimmter zentraler Unternehmenseinheiten, unterstützt durch Bestätigungen des Managements von Einheiten in deren Verantwortungsbereich, jeweils eine Bestätigung über die Ordnungsmäßigkeit der an die Zentrale berichteten Finanz-

daten sowie über die Funktionsfähigkeit entsprechender Kontrollsysteme erhalten. Die Einhaltung der Richtlinien sowie die Zuverlässigkeit und Funktionsfähigkeit der Kontrollsysteme werden kontinuierlich von der Konzernrevision konzernweit geprüft.

Unser Risikomanagementsystem ist entsprechend den Anforderungen des Aktienrechts darauf ausgerichtet, dass der Vorstand potenzielle Risiken frühzeitig erkennen und gegebenenfalls Gegenmaßnahmen einleiten kann. Die Ernst & Young GmbH Wirtschaftsprüfungsgesellschaft hat entsprechend dem Beschluss der Hauptversammlung den Konzernabschluss und den Konzernlagebericht geprüft und den unten wiedergegebenen uneingeschränkten Bestätigungsvermerk erteilt. In Anwesenheit des Abschlussprüfers wurden der Konzernabschluss, der Konzernlagebericht und der Prüfungsbericht in der Bilanzsitzung des Aufsichtsrats eingehend erörtert. Aus dem Bericht des Aufsichtsrats (Seiten 6 bis 11 des Finanzteils des Geschäftsberichts) geht das Ergebnis der Prüfung durch den Aufsichtsrat hervor.

Der Vorstand

## Versicherung der gesetzlichen Vertreter

Wir versichern nach bestem Wissen, dass gemäß den anzuwendenden Rechnungslegungsgrundsätzen der Konzernabschluss ein den tatsächlichen Verhältnissen entsprechendes Bild der Vermögens-, Finanz- und Ertragslage des Konzerns vermittelt und im Konzernlagebericht, der mit dem Lagebericht der Siemens AG zusammengefasst ist, der Geschäfts-

verlauf einschließlich des Geschäftsergebnisses und die Lage des Konzerns so dargestellt sind, dass ein den tatsächlichen Verhältnissen entsprechendes Bild vermittelt wird, sowie die wesentlichen Chancen und Risiken der voraussichtlichen Entwicklung des Konzerns beschrieben sind.

München, den 25. November 2010

Siemens AG  
Vorstand

Peter Löscher  
Joe Kaeser  
Prof. Dr. Siegfried Russwurm

Wolfgang Dehen  
Barbara Kux  
Peter Y. Solmssen

Brigitte Ederer  
Prof. Dr. Hermann Requardt

# Bestätigungsvermerk des Abschlussprüfers

Wir haben den von der Siemens Aktiengesellschaft, Berlin und München, aufgestellten Konzernabschluss – bestehend aus Konzernbilanz, Konzern-Gewinn- und Verlustrechnung, Konzern-Gesamtergebnisrechnung, Konzern-Kapitalflussrechnung, Konzern-Eigenkapitalveränderungsrechnung und Konzern-Anhang – sowie den Konzernlagebericht, der mit dem Lagebericht der Siemens Aktiengesellschaft zusammengefasst ist, für das Geschäftsjahr vom 1. Oktober 2009 bis 30. September 2010 geprüft. Die Aufstellung von Konzernabschluss und Konzernlagebericht nach den IFRS, wie sie in der Europäischen Union (EU) anzuwenden sind, und den ergänzend nach § 315a Abs. 1 HGB anzuwendenden handelsrechtlichen Vorschriften liegt in der Verantwortung des Vorstands der Siemens Aktiengesellschaft. Unsere Aufgabe ist es, auf der Grundlage der von uns durchgeführten Prüfung eine Beurteilung über den Konzernabschluss und den Konzernlagebericht abzugeben. Ergänzend wurden wir beauftragt zu beurteilen, ob der Konzernabschluss auch den IFRS insgesamt entspricht.

Wir haben unsere Konzernabschlussprüfung nach § 317 HGB unter Beachtung der vom Institut der Wirtschaftsprüfer (IDW) festgestellten deutschen Grundsätze ordnungsmäßiger Abschlussprüfung sowie unter ergänzender Beachtung der International Standards on Auditing (ISA) vorgenommen. Danach ist die Prüfung so zu planen und durchzuführen, dass Unrichtigkeiten und Verstöße, die sich auf die Darstellung des durch den Konzernabschluss unter Beachtung der anzuwendenden Rechnungslegungsvorschriften und durch den Konzernlagebericht vermittelten Bildes der Vermögens-, Finanz- und Ertragslage wesentlich auswirken, mit hinreichender Sicherheit erkannt werden. Bei der Festlegung der Prüfungshandlungen werden die Kenntnisse über die Geschäftstätigkeit und über das wirtschaftliche und rechtliche Umfeld des Konzerns sowie die Erwartungen über mögliche Fehler berücksichtigt. Im Rahmen der Prüfung werden die Wirksamkeit des rechnungsle-

gungsbezogenen internen Kontrollsystems sowie Nachweise für die Angaben im Konzernabschluss und Konzernlagebericht überwiegend auf der Basis von Stichproben beurteilt. Die Prüfung umfasst die Beurteilung der Jahresabschlüsse der in den Konzernabschluss einbezogenen Unternehmen, der Abgrenzung des Konsolidierungskreises, der angewandten Bilanzierungs- und Konsolidierungsgrundsätze und der wesentlichen Einschätzungen des Vorstands sowie die Würdigung der Gesamtdarstellung des Konzernabschlusses und des Konzernlageberichts. Wir sind der Auffassung, dass unsere Prüfung eine hinreichend sichere Grundlage für unsere Beurteilung bildet.

Unsere Prüfung hat zu keinen Einwendungen geführt.

Nach unserer Beurteilung auf Grund der bei der Prüfung gewonnenen Erkenntnisse entspricht der Konzernabschluss den IFRS, wie sie in der EU anzuwenden sind, und den ergänzend nach § 315a Abs. 1 HGB anzuwendenden handelsrechtlichen Vorschriften sowie den IFRS insgesamt und vermittelt unter Beachtung dieser Vorschriften ein den tatsächlichen Verhältnissen entsprechendes Bild der Vermögens-, Finanz- und Ertragslage des Konzerns. Der Konzernlagebericht steht in Einklang mit dem Konzernabschluss, vermittelt insgesamt ein zutreffendes Bild von der Lage des Konzerns und stellt die Chancen und Risiken der zukünftigen Entwicklung zutreffend dar.

München, den 25. November 2010

Ernst & Young GmbH  
Wirtschaftsprüfungsgesellschaft

Prof. Dr. Pfitzer                      Krämer  
Wirtschaftsprüfer                      Wirtschaftsprüfer

# Fünfjahresübersicht

## Fünfjahresübersicht

| <b>Umsatz und Ergebnis</b> (in Mio. EUR) <sup>1</sup>                           | 2010              | 2009    | 2008    | 2007     | 2006    |
|---------------------------------------------------------------------------------|-------------------|---------|---------|----------|---------|
| Umsatz                                                                          | 75.978            | 76.651  | 77.327  | 72.448   | 66.487  |
| Bruttoergebnis vom Umsatz                                                       | 21.647            | 20.710  | 21.043  | 20.876   | 17.379  |
| Gewinn aus fortgeführten Aktivitäten                                            | 4.112             | 2.457   | 1.859   | 3.909    | 2.642   |
| Gewinn (nach Steuern)                                                           | 4.068             | 2.497   | 5.886   | 4.038    | 3.345   |
| <b>Vermögens- und Kapitalstruktur</b> (in Mio. EUR) <sup>1</sup>                | 2010              | 2009    | 2008    | 2007     | 2006    |
| Kurzfristige Vermögenswerte <sup>2</sup>                                        | 49.648            | 43.634  | 43.015  | 47.932   | 50.014  |
| Kurzfristige Verbindlichkeiten und Rückstellungen <sup>2</sup>                  | 40.591            | 36.486  | 42.117  | 43.894   | 38.964  |
| Finanzschulden                                                                  | 19.913            | 19.638  | 16.079  | 15.497   | 15.297  |
| Langfristige Finanzschulden                                                     | 17.497            | 18.940  | 14.260  | 9.860    | 13.122  |
| Nettoverschuldung <sup>3</sup>                                                  | - 5.560           | - 9.309 | - 9.034 | - 11.299 | - 4.487 |
| Pensionen und ähnliche Verpflichtungen                                          | 8.464             | 5.938   | 4.361   | 2.780    | 5.083   |
| Eigenkapital                                                                    | 29.096            | 27.287  | 27.380  | 29.627   | 25.895  |
| in % der Bilanzsumme                                                            | 28                | 29      | 29      | 32       | 30      |
| Bilanzsumme                                                                     | 102.827           | 94.926  | 94.463  | 91.555   | 87.528  |
| <b>Cashflow</b> (in Mio. EUR) <sup>1</sup>                                      | 2010              | 2009    | 2008    | 2007     | 2006    |
| Mittelzufluss aus laufender Geschäftstätigkeit <sup>2</sup>                     | 9.447             | 6.246   | 8.738   | 9.822    | 5.003   |
| Abschreibungen <sup>4</sup>                                                     | 2.973             | 2.839   | 3.015   | 2.625    | 2.314   |
| Mittelabfluss aus Investitionstätigkeit <sup>2</sup>                            | - 2.768           | - 2.968 | - 9.446 | - 10.068 | - 4.315 |
| Investitionen in Immaterielle Vermögenswerte und Sachanlagen <sup>2</sup>       | - 2.336           | - 2.460 | - 2.999 | - 3.067  | - 3.183 |
| Mittelzufluss/-abfluss aus Finanzierungstätigkeit                               | - 2.823           | 36      | 3.730   | - 5.792  | 1.540   |
| Veränderung der Zahlungsmittel und Zahlungsmitteläquivalente                    | 4.023             | 3.275   | 1.989   | - 5.274  | 2.093   |
| Free Cash Flow                                                                  | 7.111             | 3.786   | 5.739   | 6.755    | 1.820   |
| <b>Personal</b> (fortgeführte Aktivitäten) <sup>1</sup>                         | 2010              | 2009    | 2008    | 2007     | 2006    |
| Mitarbeiter (Geschäftsjahresende, in Tausend) <sup>5, 6</sup>                   | 405               | 405     | 427     | 398      | 371     |
| <b>Kapitalmarktorientierte Kennzahlen</b> (in EUR, wenn nicht anders angegeben) | 2010              | 2009    | 2008    | 2007     | 2006    |
| Ergebnis je Aktie – fortgeführte Aktivitäten                                    | 4,54              | 2,60    | 1,91    | 4,13     | 2,78    |
| Ergebnis je Aktie – fortgeführte Aktivitäten (voll verwässert)                  | 4,49              | 2,58    | 1,90    | 3,99     | 2,77    |
| Dividende je Aktie                                                              | 2,70 <sup>7</sup> | 1,60    | 1,60    | 1,60     | 1,45    |
| Börsenkurs der Siemens-Aktie <sup>8</sup>                                       |                   |         |         |          |         |
| Höchst                                                                          | 79,37             | 66,45   | 108,86  | 111,17   | 79,77   |
| Tiefst                                                                          | 60,20             | 35,52   | 64,91   | 66,91    | 60,08   |
| Geschäftsjahresende                                                             | 77,43             | 63,28   | 65,75   | 96,42    | 68,80   |
| Performance der Siemens-Aktie im Vorjahresvergleich (in Prozentpunkten)         |                   |         |         |          |         |
| im Vergleich zum DAX <sup>9</sup>                                               | 15,53             | 2,24    | - 4,68  | 11,72    | - 9,80  |
| im Vergleich zum MSCI World <sup>9</sup>                                        | 18,53             | 1,86    | - 4,46  | 21,56    | - 4,95  |
| Anzahl der Aktien (in Mio. Stück)                                               | 914               | 914     | 914     | 914      | 891     |
| Börsenkapitalisierung (in Mio. EUR) <sup>9</sup>                                | 67.351            | 54.827  | 56.647  | 88.147   | 61.307  |
| Kreditrating für langfristige Finanzschulden                                    |                   |         |         |          |         |
| Standard & Poor's                                                               | A+                | A+      | AA-     | AA-      | AA-     |
| Moody's                                                                         | A1                | A1      | A1      | A1       | Aa3     |

- 1 Die Ergebnisse von Siemens VDO Automotive (SV) werden in der Konzern-Gewinn- und Verlustrechnung als nicht fortgeführte Aktivitäten ausgewiesen.
- 2 Änderungen in Rechnungslegungsverlautbarungen führten zur Umgliederung bestimmter Sachverhalte. Die Geschäftsjahre 2010, 2009 und 2008 sind vergleichbar dargestellt. Die Geschäftsjahre 2007 und 2006 wurden nicht angepasst. Für weitere Informationen hierzu siehe »Konzernabschluss«.
- 3 Die Nettoverschuldung umfasst vier Bilanzpositionen: Zahlungsmittel und Zahlungsmitteläquivalente, kurzfristige Zur Veräußerung verfügbare finanzielle Vermögenswerte, Kurzfristige Finanzschulden und kurzfristig fällige Anteile langfristiger Finanzschulden sowie Langfristige Finanzschulden.
- 4 Die Position enthält alle Abschreibungen auf Immaterielle Vermögenswerte (ohne Wertminderungen auf Geschäfts- und Firmenwerte) und Sachanlagen.
- 5 Ohne Werkstudenten und Mitarbeiter in Ausbildung. Für Informationen zu Personalaufwand siehe »Anhang, Ziffer 35«.
- 6 Aus Vereinfachungsgründen wird der Begriff »Mitarbeiter« verwendet; er steht stellvertretend für Mitarbeiterinnen und Mitarbeiter.
- 7 Vorschlag auf der Hauptversammlung.
- 8 Xetra-Schlusskurse, Frankfurt.
- 9 Auf Basis ausstehender Aktien.

| Quartalsdaten (in Mio. EUR) | 2010   | 4. Quartal | 3. Quartal | 2. Quartal | 1. Quartal |
|-----------------------------|--------|------------|------------|------------|------------|
| Umsatz                      | 75.978 | 21.229     | 19.170     | 18.227     | 17.352     |
| Gewinn (nach Steuern)       | 4.068  | - 396      | 1.435      | 1.498      | 1.531      |
| Quartalsdaten (in Mio. EUR) | 2009   | 4. Quartal | 3. Quartal | 2. Quartal | 1. Quartal |
| Umsatz                      | 76.651 | 19.714     | 18.348     | 18.955     | 19.634     |
| Gewinn (nach Steuern)       | 2.497  | - 1.063    | 1.317      | 1.013      | 1.230      |

# Wichtige Begriffe und Abkürzungen

## A

|                                                                       |                                                                                                                                                                                                                                                                                                                                                                                                                                                                                                                                                      |
|-----------------------------------------------------------------------|------------------------------------------------------------------------------------------------------------------------------------------------------------------------------------------------------------------------------------------------------------------------------------------------------------------------------------------------------------------------------------------------------------------------------------------------------------------------------------------------------------------------------------------------------|
| Aktioptionen                                                          | Entlohnungsform, bei der Bezugsrechte an Mitarbeiter ausgegeben werden, die das Recht einräumen, Aktien des eigenen Unternehmens zu einem festgelegten Ausübungskurs innerhalb eines in der Zukunft liegenden Zeitraums zu erwerben.                                                                                                                                                                                                                                                                                                                 |
| American Depository Shares (ADS) / American Depository Receipts (ADR) | ADS/ADR sind von US-amerikanischen Banken ausgegebene Hinterlegungsscheine für nicht amerikanische Aktien. Sie werden anstelle der Aktien an US-Börsen gehandelt.                                                                                                                                                                                                                                                                                                                                                                                    |
| Angepasstes EBITDA                                                    | Abkürzung für angepasstes Ergebnis vor Zinsen, Steuern, Abschreibungen und Wertminderungen (»Earnings Before Interest, Taxes, Depreciation and Amortization«). Siemens definiert das angepasste EBITDA als Gewinn/Verlust aus fortgeführten Aktivitäten vor Ertragsteuern, abzüglich Zinsertrag, Zinsaufwand und Sonstiges Finanzergebnis sowie abzüglich Ergebnis aus nach der Equity-Methode bilanzierten Beteiligungen (angepasstes EBIT) vor Abschreibungen und Wertminderungen auf Sachanlagen, Immaterielle Vermögensgegenstände und Goodwill. |
| Anwartschaftsbarwert der Pensionsverpflichtungen                      | Der Anwartschaftsbarwert (englisch: Defined Benefit Obligation) ist der ohne Abzug von Planvermögen beizulegende Barwert erwarteter künftiger Zahlungen, die erforderlich sind, um Pensionsverpflichtungen abgelen zu können, die aufgrund von Arbeitnehmerleistungen in der Berichtsperiode oder in früheren Perioden entstanden sind.                                                                                                                                                                                                              |
| Assoziiertes Unternehmen                                              | Ein assoziiertes Unternehmen ist ein Unternehmen, auf das der Anteilseigner einen maßgeblichen Einfluss ausüben kann und das weder ein Tochterunternehmen noch ein Gemeinschaftsunternehmen des beteiligten Unternehmens darstellt. Hierzu gehören auch Nicht-Kapitalgesellschaften wie Personengesellschaften. Die Unternehmen sind nach der Equity-Methode zu bilanzieren (> siehe Equity-Methode).                                                                                                                                                |

## B

|                                   |                                                                                                                                                                                                                                                                                                             |
|-----------------------------------|-------------------------------------------------------------------------------------------------------------------------------------------------------------------------------------------------------------------------------------------------------------------------------------------------------------|
| Beitragsorientierte Vorsorgepläne | Beitragsorientierte Vorsorgepläne sind Pläne für Leistungen nach Beendigung des Arbeitsverhältnisses, bei denen ein Unternehmen festgelegte Beiträge an eine eigenständige Einheit (einen Fonds) entrichtet und weder rechtlich noch faktisch zur Zahlung darüber hinausgehender Beiträge verpflichtet ist. |
|-----------------------------------|-------------------------------------------------------------------------------------------------------------------------------------------------------------------------------------------------------------------------------------------------------------------------------------------------------------|

## C

|                                                 |                                                                                                                                                                                                                                                                     |
|-------------------------------------------------|---------------------------------------------------------------------------------------------------------------------------------------------------------------------------------------------------------------------------------------------------------------------|
| Cash Conversion Rate (fortgeführte Aktivitäten) | Quotient aus Free Cash Flow aus fortgeführten Aktivitäten und dem Ergebnis aus fortgeführten Aktivitäten. Die Cash Conversion Rate war unsere Kenngröße zur Steuerung der Liquidität in unserem Fit42010-Unternehmensprogramm.                                      |
| Comfort Letter                                  | Der Comfort Letter ist eine schriftliche Erklärung, in der der Wirtschaftsprüfer die Ergebnisse gesondert vereinbarter Untersuchungshandlungen zu bestimmten Finanzangaben, die Eingang in einen Börsenprospekt finden, zusammenfasst.                              |
| Commercial Papers                               | > siehe Kurzfristige Schuldverschreibungen.                                                                                                                                                                                                                         |
| Compliance                                      | Einhaltung von Gesetzen sowie externen und internen Richtlinien beziehungsweise Verhaltenskodizes.                                                                                                                                                                  |
| Corporate Governance Kodex                      | Der Corporate Governance Kodex stellt wesentliche gesetzliche Vorschriften zur Leitung und Überwachung deutscher börsennotierter Gesellschaften dar. Er enthält international und national anerkannte Standards guter und verantwortungsvoller Unternehmensführung. |

## D

|                                         |                                                                                                                                                                                                                                                                                                                                            |
|-----------------------------------------|--------------------------------------------------------------------------------------------------------------------------------------------------------------------------------------------------------------------------------------------------------------------------------------------------------------------------------------------|
| Defined Benefit Obligation              | > siehe Anwartschaftsbarwert der Pensionsverpflichtungen.                                                                                                                                                                                                                                                                                  |
| Defined Benefit Plan                    | > siehe Leistungsorientierte Pläne.                                                                                                                                                                                                                                                                                                        |
| Derivate / Derivative Finanzinstrumente | Finanzinstrumente, deren Wert sich von einem zugrunde liegenden Vermögenswert (unter anderem Aktien, Anleihen, Währungen oder Waren) oder von einem Index, beispielsweise einem Zinssatzindex, ableitet und in der Zukunft beglichen wird, wobei anfänglich nur eine vergleichsweise geringfügige oder keine Investition erforderlich ist. |

## E

|                                     |                                                                                                                                                                                                                                                                                                                                                                                                                                                                                               |
|-------------------------------------|-----------------------------------------------------------------------------------------------------------------------------------------------------------------------------------------------------------------------------------------------------------------------------------------------------------------------------------------------------------------------------------------------------------------------------------------------------------------------------------------------|
| Equity-Methode                      | Die Equity-Methode ist ein Verfahren der Rechnungslegung zur Einbeziehung von assoziierten Unternehmen in den Konzernabschluss. Bei der Equity-Methode werden die Anteile am assoziierten Unternehmen zunächst mit den Anschaffungskosten angesetzt. In der Folge erhöht oder verringert sich der Buchwert der Anteile entsprechend dem Anteil des Eigentümers am Nettovermögen des assoziierten Unternehmens, einschließlich des Anteils am Gewinn oder Verlust des Beteiligungunternehmens. |
| Erwartete Rendite des Planvermögens | Eine zu Beginn des Geschäftsjahrs vorgenommene Schätzung der Rendite, die das Pensionsplanvermögen erwirtschaften wird.                                                                                                                                                                                                                                                                                                                                                                       |

## F

|                                       |                                                                                                                                                                                                                                                                               |
|---------------------------------------|-------------------------------------------------------------------------------------------------------------------------------------------------------------------------------------------------------------------------------------------------------------------------------|
| Finanzierungsstatus des Pensionsplans | Differenz zwischen dem pensionsbezogenen Anwartschaftsbarwert einer leistungsorientierten Verpflichtung und dem Marktwert der zur Erfüllung der Pensionsverpflichtungen dienenden und abgesonderten Vermögenswerte (Planvermögen) zu einem bestimmten Zeitpunkt.              |
| Free Cash Flow                        | Kennzahl zur Ermittlung der operativen Zahlungsmittelgenerierung. Siemens definiert den Free Cash Flow als Zahlungsmittelzufluss/-abfluss aus laufender Geschäftstätigkeit, abzüglich Zahlungsmittelabfluss für Investitionen in Immaterielle Vermögenswerte und Sachanlagen. |
| FuE                                   | Abkürzung für »Forschung und Entwicklung«.                                                                                                                                                                                                                                    |
| Funktionskosten                       | Funktionskosten umfassen die Umsatzkosten, Forschungs- und Entwicklungskosten, Vertriebs- und allgemeinen Verwaltungskosten.                                                                                                                                                  |

## G

|                                          |                                                                                                                                                                                                                       |
|------------------------------------------|-----------------------------------------------------------------------------------------------------------------------------------------------------------------------------------------------------------------------|
| Gemeinschaftsunternehmen (Joint Venture) | Ein Gemeinschaftsunternehmen (englisch: Joint Venture) ist eine vertragliche Vereinbarung, in der zwei oder mehr Partner eine wirtschaftliche Tätigkeit durchführen, die einer gemeinschaftlichen Führung unterliegt. |
| Gezeichnetes Kapital                     | Bestandteil des bilanziellen Eigenkapitals, der den Betrag umfasst, auf den die Haftung der Gesellschafter beschränkt ist. Dieser wird bei der deutschen Aktiengesellschaft auch als Grundkapital bezeichnet.         |
| Goodwill                                 | Geschäfts- und Firmenwert. Positiver Unterschied zwischen den Anschaffungskosten eines erworbenen Unternehmens und dem Marktwert seines Nettovermögens.                                                               |

## H

|                           |                                                                                                                                                                                             |
|---------------------------|---------------------------------------------------------------------------------------------------------------------------------------------------------------------------------------------|
| Hedge Accounting          | > siehe (Bilanzierung einer) Sicherungsbeziehung.                                                                                                                                           |
| HGB                       | Abkürzung für »Handelsgesetzbuch«.                                                                                                                                                          |
| Hybridschuldverschreibung | Eine Hybridschuldverschreibung ist eine Unternehmensanleihe, die aufgrund der Besonderheiten wie langer Laufzeiten und ihrer Nachrangigkeit einen eigenkapitalähnlichen Charakter aufweist. |

## I

|      |                                                                                                                                                                                                                                                                                                    |
|------|----------------------------------------------------------------------------------------------------------------------------------------------------------------------------------------------------------------------------------------------------------------------------------------------------|
| IFRS | Abkürzung für »International Financial Reporting Standards«, vormals »International Accounting Standards« (IAS). Nach IAS-Verordnung der Europäischen Union (EU) sind die IFRS grundsätzlich für kapitalmarktnotierte Unternehmen mit Sitz in der EU verpflichtend im Konzernabschluss anzuwenden. |
|------|----------------------------------------------------------------------------------------------------------------------------------------------------------------------------------------------------------------------------------------------------------------------------------------------------|

## K

|                                            |                                                                                                                                                                                                                                       |
|--------------------------------------------|---------------------------------------------------------------------------------------------------------------------------------------------------------------------------------------------------------------------------------------|
| Kapitalkostensatz (WACC)                   | Die gewichteten durchschnittlichen Kapitalkosten (englisch: Weighted Average Cost of Capital) sind die Mindestrendite, die von einem Unternehmen seitens seiner Kapitalgeber zur Finanzierung seiner Vermögenswerte erwartet wird.    |
| Kapitalrendite (ROCE)                      | Kapitalrendite (englisch: Return on Capital Employed). Die Kennzahl misst, wie effizient ein Unternehmen mit dem Kapital seiner Aktionäre und Kreditgeber umgeht.                                                                     |
| Konzern-Treasury                           | Zentralabteilung für das zentrale Finanzmanagement, insbesondere des Liquiditäts- und Zahlungsmittelmanagements sowie des Managements der finanziellen Risiken.                                                                       |
| Konzerneigene Finanzierungseinheit         | Als Geschäftsbereich organisierte Finanzdienstleistungseinheit innerhalb eines Industriekonzerns, die vorwiegend den Kunden der operativen Einheiten Finanzierungsleistungen anbietet.                                                |
| Kurzfristige Schuldverschreibungen         | Kurzfristige Schuldverschreibungen (englisch: Commercial Papers) sind auf den Inhaber lautende kurzfristige Schuldtitel. Kurzfristige Schuldverschreibungen werden von bonitätsmäßig einwandfreien Schuldnern am Geldmarkt emittiert. |
| Kurzfristiges Schuldverschreibungsprogramm | Programm zur Begebung von kurzfristigen Schuldverschreibungen (englisch: Commercial Paper Program), das wahlweise in unterschiedlichen Währungen in Anspruch genommen werden kann.                                                    |



## L

|                            |                                                                                                                                                                                                                                |
|----------------------------|--------------------------------------------------------------------------------------------------------------------------------------------------------------------------------------------------------------------------------|
| Latente Steuern            | Aktiv- und/oder Passivpositionen zum Ausgleich des Unterschieds zwischen der tatsächlich veranlagten Steuerschuld und der aufgrund der handelsrechtlichen Bilanzierung ermittelten wirtschaftlichen Steuerbelastung.           |
| Leasing                    | Ein Leasingverhältnis ist eine Vereinbarung, bei der der Leasinggeber dem Leasingnehmer gegen eine Zahlung oder eine Reihe von Zahlungen das Recht auf Nutzung eines Vermögenswerts für einen vereinbarten Zeitraum überträgt. |
| Leistungsorientierte Pläne | Leistungsorientierte Pläne (englisch: Defined Benefit Plan) sind Pläne für Leistungen nach Beendigung des Arbeitsverhältnisses, die nicht unter die Definition der beitragsorientierten Pläne fallen.                          |

## M

|                                              |                                                                                                                                                                                                                                                                                                                                                                                                                                                                                                                                                                                                           |
|----------------------------------------------|-----------------------------------------------------------------------------------------------------------------------------------------------------------------------------------------------------------------------------------------------------------------------------------------------------------------------------------------------------------------------------------------------------------------------------------------------------------------------------------------------------------------------------------------------------------------------------------------------------------|
| Medium Term Notes Program                    | > siehe Mittelfristiges Schuldverschreibungsprogramm.                                                                                                                                                                                                                                                                                                                                                                                                                                                                                                                                                     |
| Mittelfristiges Schuldverschreibungsprogramm | Unter einem mittelfristigen Schuldverschreibungsprogramm (englisch: Medium Term Notes Program) versteht man eine Art Rahmenvertrag zwischen Unternehmen und Händlern von Schuldverschreibungen (meist Banken). Im Rahmen eines solchen Programms wird Unternehmen die Emission von Wertpapieren am Kapitalmarkt zur flexiblen Beschaffung von Fremdkapital innerhalb kürzester Zeit ermöglicht. Die Bedingungen der jeweiligen Schuldverschreibungen, insbesondere hinsichtlich Laufzeit, Verzinsung und Währung, werden dabei zum Emissionszeitpunkt nach Emissionsziel und Marktbedingungen festgelegt. |
| Moody's Investors Service                    | Unabhängige Ratingagentur, die standardisierte Indikatoren zur Beurteilung der Bonität von Unternehmen ermittelt.                                                                                                                                                                                                                                                                                                                                                                                                                                                                                         |

## N

|                                               |                                                                                                                                                                                                                                                                                                                                                                                                                                                                                                                                                              |
|-----------------------------------------------|--------------------------------------------------------------------------------------------------------------------------------------------------------------------------------------------------------------------------------------------------------------------------------------------------------------------------------------------------------------------------------------------------------------------------------------------------------------------------------------------------------------------------------------------------------------|
| Net Periodic Benefit Costs                    | > siehe Nettopensionsaufwand.                                                                                                                                                                                                                                                                                                                                                                                                                                                                                                                                |
| Nettopensionsaufwand (periodenbezogen) (NPBC) | Der periodenbezogene Nettopensionsaufwand (englisch: Net Periodic Benefit Costs) beschreibt den Betrag der in der Konzern-Gewinn- und Verlustrechnung realisierten Pensionskosten. Sie setzen sich zusammen aus dem Aufwand für im Geschäftsjahr hinzuerworbene Versorgungsansprüche, dem Zinsaufwand, der erwarteten Rendite des Fondsvermögens, der Tilgung von Aufwendungen/Erträgen aus rückwirkenden Planänderungen und Verlusten/Gewinnen aus Beendigungen und Kürzungen von Plänen.                                                                   |
| Net Working Capital                           | > siehe Nettoumlaufvermögen.                                                                                                                                                                                                                                                                                                                                                                                                                                                                                                                                 |
| Nettoumlaufvermögen                           | Das Nettoumlaufvermögen (englisch: Net Working Capital) ist der Saldo zwischen kurzfristigen Vermögenswerten und kurzfristigen Verbindlichkeiten und kann als Maßstab der Liquidität verwendet werden, indem die kurzfristigen Vermögensgegenstände in Relation zu den kurzfristigen Verbindlichkeiten gesetzt werden.                                                                                                                                                                                                                                       |
| Nicht fortgeführte Aktivitäten                | Nicht fortgeführte Aktivitäten umfassen Unternehmensbestandteile, die veräußert wurden oder als »Zur Veräußerung gehalten« klassifiziert sind und die einen gesonderten, wesentlichen Geschäftszweig oder geografischen Geschäftsbereich darstellen. Außerdem kann hierunter ein Teil eines einzelnen abgestimmten Plans zur Veräußerung eines gesonderten wesentlichen Geschäftszweigs oder geografischen Geschäftsbereichs ebenso verstanden werden wie ein Tochterunternehmen, das ausschließlich mit der Absicht einer Weiterveräußerung erworben wurde. |
| NYSE                                          | Abkürzung für »New York Stock Exchange«, die bedeutende Wertpapierbörse in New York.                                                                                                                                                                                                                                                                                                                                                                                                                                                                         |

## P

|              |                                                                                                                                                                                                                                                                                                                                                                                                                                                                                                                                                                                                                                                                       |
|--------------|-----------------------------------------------------------------------------------------------------------------------------------------------------------------------------------------------------------------------------------------------------------------------------------------------------------------------------------------------------------------------------------------------------------------------------------------------------------------------------------------------------------------------------------------------------------------------------------------------------------------------------------------------------------------------|
| Planvermögen | Das Planvermögen in Verbindung mit Pensionsplänen umfasst Vermögen, das durch einen langfristig ausgelegten Fonds zur Erfüllung von Leistungen an Arbeitnehmer gehalten wird, ebenso wie qualifizierende Versicherungsverträge. Das Planvermögen wird von einer rechtlich selbstständigen und vom Unternehmen separierten Gesellschaft (i. d. R. Pensionsfonds bzw. Versorgungseinrichtung) gehalten und dient nur der Auszahlung oder Finanzierung von Pensionen. Das Planvermögen unterliegt nicht der Zugriffsberechtigung des Pensionen gewährenden Unternehmens und kann nicht für andere Zwecke als zur Pensionsauszahlung oder -finanzierung verwendet werden. |
|--------------|-----------------------------------------------------------------------------------------------------------------------------------------------------------------------------------------------------------------------------------------------------------------------------------------------------------------------------------------------------------------------------------------------------------------------------------------------------------------------------------------------------------------------------------------------------------------------------------------------------------------------------------------------------------------------|

## R

|                                   |                                                                                                                                                                                                      |
|-----------------------------------|------------------------------------------------------------------------------------------------------------------------------------------------------------------------------------------------------|
| Rating                            | Standardisierter Indikator zur Beurteilung der Bonität eines Unternehmens; ermittelt von darauf spezialisierten Ratingagenturen (zum Beispiel > Standard & Poor's oder > Moody's Investors Service). |
| Return on Capital Employed (ROCE) | > siehe Kapitalrendite.                                                                                                                                                                              |
| Risikomanagement                  | Systematische Vorgehensweise, potenzielle Chancen und Risiken zu identifizieren, zu bewerten und Strategien zur Reaktion auf diese Chancen und Risiken auszuwählen und umzusetzen.                   |

## S

|                                          |                                                                                                                                                                                                                                                                                                      |
|------------------------------------------|------------------------------------------------------------------------------------------------------------------------------------------------------------------------------------------------------------------------------------------------------------------------------------------------------|
| SEC                                      | Abkürzung für »Securities and Exchange Commission«, die Börsenaufsichtsbehörde in den USA.                                                                                                                                                                                                           |
| Sensitivitätsanalyse                     | Analyse der Wirkung möglicher Veränderungen von Annahmen.                                                                                                                                                                                                                                            |
| (Bilanzierung einer) Sicherungsbeziehung | Methode zur Bilanzierung von Sicherungsbeziehungen (englisch: Hedge Accounting); diese dienen der Absicherung von Zahlungsflüssen beziehungsweise beizulegenden Zeitwerten von Vermögenswerten und Schulden unter Einsatz von Sicherungsinstrumenten, beispielsweise derivativen Finanzinstrumenten. |
| Standard & Poor's                        | Unabhängige Ratingagentur, die standardisierte Indikatoren zur Beurteilung der Bonität von Unternehmen ermittelt.                                                                                                                                                                                    |

## V

|                                |                                                                                                                                                                                                                                                                                                                            |
|--------------------------------|----------------------------------------------------------------------------------------------------------------------------------------------------------------------------------------------------------------------------------------------------------------------------------------------------------------------------|
| Vermögensmanagement            | Steuerung und Kontrolle der Vermögensstruktur eines Unternehmens mit dem Ziel, dieses Vermögen möglichst effizient in der Geschäftstätigkeit einzusetzen.                                                                                                                                                                  |
| Verwässertes Ergebnis je Aktie | Eine Verwässerung ist eine Reduzierung des Ergebnisses je Aktie beziehungsweise eine Erhöhung des Verlusts je Aktie aufgrund der Annahme, dass bei wandelbaren Instrumenten eine Wandlung stattfindet, dass Optionen oder Optionsscheine ausgeübt oder dass Stammaktien unter bestimmten Voraussetzungen emittiert werden. |

## Z

|                                                  |                                                                                                                                                                                                                                         |
|--------------------------------------------------|-----------------------------------------------------------------------------------------------------------------------------------------------------------------------------------------------------------------------------------------|
| Zahlungsmittelzufluss /<br>Zahlungsmittelabfluss | Zuflüsse und Abflüsse von Zahlungsmitteln (Barmitteln und Sichteinlagen) und Zahlungsmitteläquivalenten (kurzfristig hochliquide Finanzinvestitionen). Die Zahlungsmittelflüsse werden in der Konzern-Kapitalflussrechnung dargestellt. |
|--------------------------------------------------|-----------------------------------------------------------------------------------------------------------------------------------------------------------------------------------------------------------------------------------------|

# Stichwortverzeichnis

## A

|                                                                               |                                    |
|-------------------------------------------------------------------------------|------------------------------------|
| Abweichungen von NYSE-Standards bezüglich Coporate Governance                 | II 27                              |
| Aktienbasierte Vergütung                                                      | II 34, II 37, II 41, II 45, II 250 |
| Aktienbesitz des Vorstands                                                    | II 26                              |
| Angaben nach § 289 Abs. 4 und § 315 Abs. 4 HGB und erläuternder Bericht       | II 140                             |
| Angaben nach § 289 Abs. 5 und § 315 Abs. 2 Nr. 5 HGB und erläuternder Bericht | II 145                             |
| Anhang zum Konzernabschluss                                                   | II 168                             |
| Aufsichtsrat der Siemens AG                                                   | II 282                             |
| Auftragseingang                                                               | II 84, II 259                      |
| Ausschüsse des Aufsichtsrats                                                  | II 284                             |
| Ausschüsse des Vorstands                                                      | II 288                             |

## B

|                                             |              |
|---------------------------------------------|--------------|
| Bericht des Aufsichtsrats                   | II 6         |
| Bestätigungsvermerk des Abschlussprüfers    | II 291       |
| Brief an die Aktionäre                      | II 12        |
| BSH Bosch und Siemens Hausgeräte GmbH (BSH) | II 4, II 200 |
| Building Technologies                       | II 92        |

## C

|                              |                |
|------------------------------|----------------|
| Chancen                      | II 123, II 139 |
| Compliance-Ausschuss         | II 25          |
| Compliance-Bericht           | II 30          |
| Corporate Governance         | II 21, II 265  |
| Corporate-Governance-Bericht | II 23          |

## D

|                                      |                       |
|--------------------------------------|-----------------------|
| Demografischer Wandel und Gesundheit | I 27, II 53           |
| DESERTEC-Konzept                     | I 25, I 42            |
| Diagnostics                          | II 97                 |
| Dividende                            | II 19, II 104, II 156 |
| Drive Technologies                   | II 92                 |

## E

|                                                                                                    |                       |
|----------------------------------------------------------------------------------------------------|-----------------------|
| Eckdaten Siemens                                                                                   | II 3, II 84           |
| Eigenkapital- und Belegschaftsaktienausschuss                                                      | II 288                |
| Elektromobilität                                                                                   | I 48                  |
| Entsprechenserklärung zum Deutschen Corporate Governance Kodex                                     | II 29                 |
| Equity Investments                                                                                 | II 52, II 97          |
| Ergebnis je Aktie                                                                                  | II 256                |
| Erklärung des Vorstands                                                                            | II 290                |
| Erklärung zur Unternehmensführung nach § 289a HGB (Bestandteil des Zusammengefassten Lageberichts) | II 29                 |
| Ertragslage                                                                                        | II 84, II 124, II 152 |

## F

|                                            |                        |
|--------------------------------------------|------------------------|
| Finanzausstattung und Kapitalerfordernisse | II 110                 |
| Finanzielle Steuerungsgrößen               | II 57                  |
| Finanzieller Überblick                     | II 81                  |
| Finanzkalender                             | II 2                   |
| Finanzlage                                 | II 104, II 125, II 154 |
| Finanz- und Investitionsausschuss          | II 25                  |
| Fit42010                                   | II 15, II 57           |
| Fokusthemen (One Siemens)                  | I 60                   |
| Forschung und Entwicklung                  | II 61, II 157          |
| Fossil Power Generation                    | II 94                  |
| Führungs- und Kontrollstruktur             | II 23                  |
| Fünfjahresübersicht                        | II 292                 |
| Fundament                                  | I 14                   |

## G

|                                            |             |
|--------------------------------------------|-------------|
| Gesamtaussage zur wirtschaftlichen Lage    | II 121      |
| Geschäft und Rahmenbedingungen             | II 50       |
| Globalisierung und Wettbewerbsfähigkeit    | I 29, II 54 |
| Glossar                                    | II 294      |
| Grundsätze und Ziele des Finanzmanagements | II 104      |

## I

|                        |        |
|------------------------|--------|
| Imaging & IT           | II 97  |
| Impressum              | II 301 |
| Industry Automation    | II 92  |
| Industry Solutions     | II 92  |
| Integritäts-Initiative | II 32  |
| Investor Relations     | II 18  |

## K

|                                          |                      |
|------------------------------------------|----------------------|
| Kapitalstruktur                          | II 59, II 61, II 106 |
| Klimaschutz                              | I 28, II 71, II 139  |
| Klimawandel und Energieversorgung        | I 28, II 53          |
| Konzern-Eigenkapitalveränderungsrechnung | II 166               |
| Konzern-Gesamtergebnisrechnung           | II 163               |
| Konzern-Gewinn- und Verlustrechnung      | II 162               |
| Konzern-Kapitalflussrechnung             | II 165               |
| Konzernabschluss                         | II 161               |
| Konzernabschluss, Anhang                 | II 168               |
| Konzernbilanz                            | II 164               |
| Kreditratings                            | II 20, II 105        |

## M

|                                     |               |
|-------------------------------------|---------------|
| Management der finanziellen Risiken | II 105        |
| Mandate des Aufsichtsrats           | II 282        |
| Mandate des Vorstands               | II 286        |
| Mitarbeiter                         | II 69, II 157 |
| Mobility                            | II 92         |

## N

|                              |               |
|------------------------------|---------------|
| Nachhaltigkeit               | I 16, II 67   |
| Nachtragsbericht             | II 122        |
| Nokia Siemens Networks (NSN) | II 52, II 184 |
| Nominierungsausschuss        | II 25         |

## O

|             |       |
|-------------|-------|
| Oil & Gas   | II 95 |
| One Siemens | I 56  |
| OSRAM       | II 92 |

## P

|                             |        |
|-----------------------------|--------|
| Power Distribution          | II 95  |
| Power Transmission          | II 95  |
| Präsidium des Aufsichtsrats | II 24  |
| Prognosebericht             | II 123 |
| Prüfungsausschuss           | II 25  |

## R

|                      |                                |
|----------------------|--------------------------------|
| Rechtsstreitigkeiten | II 140, II 228                 |
| Renewable Energy     | II 94                          |
| Risiken              | II 123, II 129, II 158, II 244 |
| Risikomanagement     | II 127, II 158, II 242         |

## S

|                                          |                             |
|------------------------------------------|-----------------------------|
| SAM Dow Jones Sustainability Index       | I 46, II 68                 |
| Segmentinformationen                     | II 4, II 90, II 168, II 257 |
| Sektoren                                 | II 90                       |
| Sektor Energy                            | II 4, II 93, II 303         |
| Sektor Healthcare                        | II 4, II 96, II 303         |
| Sektor Industry                          | II 4, II 90, II 303         |
| Sektorübergreifende Dienstleistungen     | II 303                      |
| Sektorübergreifende Geschäfte            | II 98, II 303               |
| Siemens AG (Erläuterungen auf Basis HGB) | II 151                      |
| Siemens-Aktie                            | II 18                       |
| Siemens Financial Services (SFS)         | II 99                       |
| Siemens IT Solutions and Services        | II 98                       |
| Siemens Real Estate (SRE)                | II 100                      |
| Smart Grid                               | I 42, I 53                  |
| Solarthermie                             | I 18, I 25                  |
| SOMATOM Spirit                           | I 32                        |
| Strategie                                | I 8, II 54                  |
| Strategische Stoßrichtungen              | I 40, II 54                 |
| Supply Chain Management                  | II 64                       |

## T

|                                                          |        |
|----------------------------------------------------------|--------|
| Transaktionen mit nahestehenden Unternehmen und Personen | II 261 |
|----------------------------------------------------------|--------|

## U

|                                           |             |
|-------------------------------------------|-------------|
| Umweltportfolio                           | I 16, II 71 |
| Umweltprogramm                            | I 17, II 73 |
| Unternehmensstruktur                      | II 303      |
| Urbanisierung und nachhaltige Entwicklung | I 28, II 53 |

## V

|                                         |                     |
|-----------------------------------------|---------------------|
| Vergütungsbericht                       | II 34, II 148       |
| Vermittlungsausschuss                   | II 25               |
| Vermögenslage                           | II 118, II 154      |
| Versicherung der gesetzlichen Vertreter | II 290              |
| Vision                                  | I 64                |
| Vorstand der Siemens AG                 | I 6, II 286, II 303 |

## W

|                                   |       |
|-----------------------------------|-------|
| Werte                             | I 15  |
| Wirtschaftliche Rahmenbedingungen | II 75 |
| Workflow & Solutions              | II 97 |

## Z

|                                            |       |
|--------------------------------------------|-------|
| Zielsystem zur nachhaltigen Wertsteigerung | I 59  |
| Zusammengefasster Lagebericht              | II 49 |

## INFORMATIONEN ZUM INHALT

Anschrift Siemens AG  
Wittelsbacherplatz 2  
D-80333 München

Telefon +49 (0)89 636-33443 (Media Relations)  
+49 (0)89 636-32474 (Investor Relations)  
Telefax +49 (0)89 636-30085 (Media Relations)  
+49 (0)89 636-32830 (Investor Relations)  
E-Mail [press@siemens.com](mailto:press@siemens.com)  
[investorrelations@siemens.com](mailto:investorrelations@siemens.com)

## KONZEPTION UND KOORDINATION

### Corporate Communications and Government Affairs:

Christoph Wegener, Johannes von Karczewski

### Corporate Finance:

Ralph Dietrich

## GESTALTUNG

häfelinger + wagner design GmbH

## PRODUKTION

Publicis KommunikationsAgentur GmbH, GWA, München

© 2010 by Siemens AG, Berlin und München

## RECHTSHINWEIS

Die in diesem Dokument wiedergegebenen Bezeichnungen können Marken sein, deren Benutzung durch Dritte für deren Zwecke die Rechte der Inhaber verletzen kann.

## UMWELTFREUNDLICHE HERSTELLUNG

Bei der Herstellung dieses Berichts haben wir auf die Verwendung von chlorfrei gebleichten Materialien und klimaneutrale Produktionsprozesse besonderen Wert gelegt. Das Papier stammt gemäß Forest Stewardship Council (FSC) nur aus kontrollierten Quellen wie bewirtschafteten Wäldern. Die Papiermühle, in der das Papier gefertigt wurde, ist nach den Richtlinien der ISO 9001, 14001 und 18001 zertifiziert. Sie verwendet nur chlorfrei gebleichten Zellstoff (TCF), der zum Teil ohne Einsatz von Elementarchlor (ECF) gebleicht wurde.

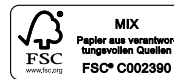



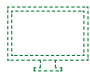

## INTERNET

Geschäftsbericht

[www.siemens.com/geschaeftsbericht](http://www.siemens.com/geschaeftsbericht)

Nachhaltigkeitsbericht

[www.siemens.com/nachhaltigkeitsbericht](http://www.siemens.com/nachhaltigkeitsbericht)

Pictures of the Future

[www.siemens.de/pof](http://www.siemens.de/pof)

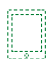

## INTERNET MOBIL

Geschäftsbericht

[www.siemens.com/gb-mobil](http://www.siemens.com/gb-mobil)

Mobile Unternehmenswebsite

[m.siemens.com](http://m.siemens.com)

## GESCHÄFTSBERICHT-BESTELLUNGEN

E-Mail [siemens@bek-gmbh.de](mailto:siemens@bek-gmbh.de)

Internet [www.siemens.com/bestellung-geschaeftsbericht](http://www.siemens.com/bestellung-geschaeftsbericht)

Telefon +49 (0) 7237 - 480024

Telefax +49 (0) 7237 - 1736

## GESCHÄFTSBERICHT-BESTELLUNGEN

### FÜR SIEMENS-MITARBEITER

LZF, Fürth-Bislohe

Intranet <https://c4bs.gss.siemens.com>

Telefax +49 (0) 911 654 - 4271

Deutsch Bestell-Nr. A19100-F-V83

Englisch Bestell-Nr. A19100-F-V83-X-7600

Französisch Bestell-Nr. A19100-F-V83-X-7700

Spanisch Bestell-Nr. A19100-F-V83-X-7800

Bitte bestellen Sie ausschließlich mit postalischer Versandanschrift und kompletter Org-ID.

Zusätzlich zum Geschäftsbericht am Geschäftsjahresende veröffentlicht Siemens vierteljährliche Konzerngeschäftszahlen in Form von Presseinformationen. Die Presseinformationen werden durch Telefonkonferenzen mit Journalisten und Analysten ergänzt. Zwei große Pressekonferenzen für Journalisten – zum Halbjahr und zum Ende des Geschäftsjahrs – sowie eine jährliche Analystenkonferenz geben Journalisten und Analysten zusätzlich Gelegenheit, die Geschäftsentwicklung nachzuvollziehen. Die Quartalsberichterstattung für die ersten drei Quartale wird zudem durch einen umfangreichen Konzernzwischenbericht, bestehend aus Konzernzwischenlagebericht und -abschluss einschließlich Anhang, ergänzt. Diese Konzernzwischenberichte werden unter anderem bei der Deutschen Börse und der US-amerikanischen Wertpapieraufsichtsbehörde SEC (U.S. Securities and Exchange Commission) eingereicht. Darüber hinaus reicht Siemens einen in englischer Sprache verfassten Jahresbericht (Form 20-F) bei der SEC ein. Die gesamte Finanzberichterstattung veröffentlichen wir auf unserer Internetseite [www.siemens.com/finanzberichte](http://www.siemens.com/finanzberichte).

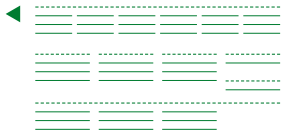

## ORGANIGRAMM

# Unternehmensstruktur

## Vorstand der Siemens AG<sup>1</sup>

---

### Peter Löscher

Vorsitzender

Corporate  
Communications and  
Government Affairs

Corporate  
Development

### Joe Kaeser

Corporate Finance  
and Controlling

Financial Services

Siemens IT Solutions  
and Services

Siemens Real Estate

Equity Investments

### Brigitte Ederer

Corporate  
Human Resources

Europa, Gemeinschaft  
Unabhängiger Staaten

### Peter Y. Solmssen

Corporate  
Legal and Compliance

Amerika

## Sektor Industry Siegfried Russwurm

---

**Industry Automation** Anton S. Huber

**Drive Technologies** Klaus Helmrich

**Building Technologies** Johannes Milde

**OSRAM** Martin Goetzeler

**Industry Solutions** Jens Michael Wegmann

**Mobility** Hans-Jörg Grundmann

## Sektor Energy Wolfgang Dehen

---

**Fossil Power Generation** Michael Süß

**Renewable Energy** René Umlauf

**Oil & Gas** Tom Blades

**Energy Service** Randy H. Zwirn

**Power Transmission** Udo Niehage

**Power Distribution** Ralf Christian

## Regionale Clusterorganisation

---

### Europa, GUS<sup>2</sup>, Afrika, Naher und Mittlerer Osten

**Deutschland** Rudolf Martin Siegers

**Nord-West-Europa** Andreas J. Goss

**Süd-West-Europa** Francisco Belli

**Zentral-Ost-Europa** Wolfgang Hesoun

**Russland/Zentralasien** Dietrich Möller

**Afrika** Dirk Hoke

**Naher und Mittlerer Osten** Erich Käser

### Amerika

**USA** Eric Spiegel

**Kanada** Roland Aurich

**Meso-Amerika** Louise Koopman Goeser

**Brasilien** Adilson Primo

**Austral-Andina** Daniel Fernandez

---

<sup>1</sup> Siehe auch Buch I, Seite 6f., und Buch II, Seite 286f.  
<sup>2</sup> Gemeinschaft Unabhängiger Staaten

---

## Barbara Kux

Corporate Supply  
Chain Management

Corporate Sustainability

Global Shared  
Services

## Siegfried Russwurm

Industry

Corporate Information  
Technology

Afrika, Naher und  
Mittlerer Osten

## Wolfgang Dehen

Energy

Asien, Australien

## Hermann Requardt

Healthcare

Corporate Technology

---

## Sektor Healthcare

Hermann Requardt

**Imaging and Therapy Systems** Bernd Montag

**Clinical Products** Norbert Gaus

**Diagnostics** Michael Reitermann

**Customer Solutions** Tom Miller

---

## Sektorübergreifende Geschäfte

**Siemens IT Solutions and Services** Christian Oecking

**Financial Services** Roland Chalons-Browne

---

## Sektorübergreifende Dienstleistungen

**Global Shared Services** Michel de Zeeuw

**Siemens Real Estate** Zsolt Sluitner

---

## Asien, Australien

**Nord-Ost-Asien** Mei-Wei Cheng

**Südasien** Armin Bruck

**Japan** N.N.

**Pazifik** Albert Goller

**ASEAN** Lothar Herrmann
