# Supplementary material
Source: publisher site journal article supplement (https://www.degruyterbrill.com/publication/isbn/9783110432879/downloadAsset/9783110432879_Elektronischer_Anhang_2.zip)
Supplement: Supplementary file 89 [file Siemens Unsere Werte.pdf › Korpustexte/Korpustexte pdf/Siemens/Siemens Unsere Werte.pdf]

## Unsere Werte

You are here: [> Startseite](#) [> Jobs & Karriere](#) [> Arbeiten bei Siemens in Deutschland](#) [> Unsere Werte](#)

### Verantwortungsvoll, exzellent und innovativ zu sein: Diese Ansprüche stellen wir an uns und unsere Arbeit.

Hierbei lassen wir uns vom Prinzip der Nachhaltigkeit leiten – in ökologischer, wirtschaftlicher und gesellschaftlich-sozialer Hinsicht.

Innovative Konzepte und visionäre Ideen, gepaart mit der unternehmerischen Weitsicht, auch Risiken einzugehen, um dauerhaft erfolgreich zu sein – diese Einstellung unseres Firmengründers Werner von Siemens hat uns zu einem erfolgreichen internationalen Anbieter von zukunftsweisenden Spitzentechnologien gemacht. Werner von Siemens war zu seiner Zeit ein Pionier auf dem Gebiet der Elektrotechnik. Und unser Unternehmen ist in diesem Geist groß und erfolgreich geworden. Diesen Weg gehen wir konsequent weiter.

Damals wie heute gehört hierzu ein starkes Fundament, eine Basis, auf der wir aufbauen können. Unsere Werte, Nachhaltigkeit als leitendes Prinzip und unser Anspruch, überall auf der Welt führende Markt- und Technologiepositionen einzunehmen, zeichnen es aus.

Ideen, Erfindungen, Patente – seit Gründung der »Telegraphen-Bauanstalt von Siemens & Halske« im Jahr 1847 prägen technische Innovationen und Spitzenleistungen den Erfolg unserer Marke. Als Pionier der Elektrotechnik haben wir die Industrialisierung maßgeblich beeinflusst, als Pionier ist dieses Unternehmen groß geworden. Bis heute beflügelt uns der Pioniergeist unserer Mitarbeiter. Ihre Antworten auf die großen Herausforderungen der Zeit haben uns zu einem der international führenden Technologiekonzerne gemacht. Den Rahmen für unser profitables, nachhaltiges und dauerhaftes Wachstum geben unser Wertesystem und unsere Strategie vor. Sie bilden die Leitlinien für das Handeln aller Mitarbeiter. Zum Fundament der Strategiepyramide von Siemens gehören unsere unternehmerischen Werte.

Wir handeln **verantwortungsvoll**. Verantwortung übernehmen wir gegenüber unseren Kunden, für die wir ein verlässlicher Partner sind. Verantwortung übernehmen wir als »guter Unternehmensbürger« in den Gesellschaften, in denen wir weltweit tätig sind. Verantwortung haben wir auch für unsere Mitarbeiter, für die wir dauerhaft ein attraktiver Arbeitgeber sein wollen. Und schließlich tragen wir Verantwortung für unsere Aktionäre, indem wir den Wert unseres Unternehmens nachhaltig steigern.

Unser Unternehmen führen wir nach höchsten professionellen und ethischen Standards und verlangen dies auch von unseren Geschäftspartnern, Lieferanten und Interessenvertretern.

Wir handeln **exzellent**. Unsere Basis sind ehrgeizige Ziele, die wir von unserer Vision ableiten und anhand von Benchmarks verifizieren. Wir unterstützen unsere Kunden bei der Suche nach perfekter Qualität und bieten ihnen Lösungen, die ihre Erwartungen übertreffen. Wir sind exzellent, indem wir einen Weg der kontinuierlichen Verbesserung definieren und bestehende Prozesse permanent hinterfragen. Wir reagieren schnell, wenn sich neue Geschäftsmöglichkeiten eröffnen. Exzellenz bedeutet auch, für die besten Köpfe am Markt attraktiv zu sein. Wir vermitteln exzellente Qualifikationen und bieten beste Arbeitsbedingungen, um Höchstleistungen zu erbringen.

Wir handeln **innovativ**. Unsere Mitarbeiter haben mit ihren Erfindungen und Ideen die Welt verändert. Wir führen damit konsequent unsere mehr als 165-jährige Unternehmens- und Innovationsgeschichte fort. Forschungs- und Entwicklungsaktivitäten richten sich eng an unserer Geschäftsstrategie aus. Wir wollen in allen Geschäftsfeldern die maßgeblichen Trends setzen und streben bei etablierten wie neuen Technologien eine führende Marktposition an. Mit der Energie und Kreativität unserer Mitarbeiter gehen wir neue und ungewohnte Wege. Dabei handeln wir stets unternehmerisch und messen den Erfolg unserer Innovationen am nachhaltigen Erfolg unserer Kunden.
