# Supplementary material
Source: publisher site journal article supplement (https://www.degruyterbrill.com/publication/isbn/9783110432879/downloadAsset/9783110432879_Elektronischer_Anhang_2.zip)
Supplement: Supplementary file 90 [file Siemens Vision.pdf › Korpustexte/Korpustexte pdf/Siemens/Siemens Vision.pdf]

---

Demografischer Wandel, Urbanisierung, Klimawandel und Globalisierung – diese Megatrends stellen die Menschheit vor Aufgaben von bisher unbekannten Dimensionen. Der Wandel, den wir derzeit erleben, wird anhalten und unsere Welt langfristig prägen. Vor dem Hintergrund tief greifender weltweiter Veränderungen formulieren wir den Anspruch an uns selbst und damit unsere Vision für alle Geschäftsfelder:

Siemens – der Pionier in

- > Energieeffizienz
- > industrieller Produktivität
- > bezahlbaren und personalisierten Gesundheitssystemen
- > intelligenten Infrastrukturlösungen

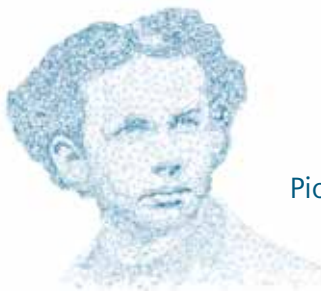

Pionier des Stromzeitalters: Bereits 1878 entstand im Auftrag  
des bayerischen Königs Ludwig II. das  
**weltweit erste Elektrizitätswerk** –  
zwölf Jahre nach der Entdeckung des dynamo-  
elektrischen Prinzips durch Werner von Siemens.

[www.siemens.com/linderhof](http://www.siemens.com/linderhof)

## Vision

Pionier zu sein gehört für Siemens zum gelebten Selbstverständnis, es ist unsere Vision und prägender Bestandteil unserer Unternehmenskultur. Diese Vision basiert auf unseren Werten – verantwortungsvoll, exzellent und innovativ –, die das Fundament für den Erfolg von Siemens bilden. Im Zusammenspiel mit Werten, Strategie und One Siemens formuliert die Vision unseren unternehmerischen Anspruch. Sie gibt unserer Strategie die Richtung vor.

Siemens stellt sich den Herausforderungen unserer Zeit – heute genauso wie vor über 160 Jahren, als Werner von Siemens das Unternehmen gründete. Diese Haltung ist Ausdruck unseres Pioniergeists. Pionier zu sein bedeutet für uns mehr als Erfindung und Innovation. Es bedeutet, Neuland zu schaffen, zu betreten und dauerhaft zu bestellen, innovative Produkte und Lösungen kundenorientiert zu entwickeln und auf den Markt zu bringen. Und es bedeutet auch, kalkulierbare Risiken einzugehen, um Innovationen voranzutreiben.

Wir liefern Antworten auf technologische Fragen der Zukunft, wie folgende Beispiele zeigen:

### > Lassen sich Elektrofahrzeuge auch kabellos laden?

Gemeinsam mit BMW haben unsere Forscher eine Technologie entwickelt, mit der Fahrzeugbatterien sicher, komfortabel und vor allem kontaktlos aufgeladen werden können – und das sogar bei kurzen Stopps. Dies eröffnet neue Perspektiven: Weil sich die Ladestationen nahezu unsichtbar in jede Umgebung integrieren lassen, können Elektroautos künftig noch leichter als intelligente Zwischenspeicher für Stromüberschüsse aus Sonnen- und Windkraft genutzt werden.

### > Ist es möglich, Operationsgeräte berührungslos – allein mit Gestik – zu steuern?

Unsere Technologie versetzt den Arzt in die Lage, Medizingeräte mit einfachen Handbewegungen zu bedienen, ohne sie anfassen zu müssen. Das erleichtert nicht nur seine Arbeit spürbar, sondern senkt auch das Infektionsrisiko für den Patienten – eine wichtige Lösung, die in die Zukunft weist.

### > Wie sieht die Windturbine der Zukunft aus?

Weltweit sind heute mehr als 9.000 Siemens-Windkraftanlagen installiert, die eine Spitzenleistung von über 13.000 Megawatt (MW) erzielen. Diese Leistung wollen wir erhöhen, indem wir die Leistungsfähigkeit und Verfügbarkeit der Maschinen weiter optimieren. Die neue getriebelose 6-MW-Windturbine, die speziell für den Einsatz auf hoher See entwickelt wurde, zeichnet sich durch ein – gemessen an der Leistung – geringes Gesamtgewicht aus. Sie wiegt nur so viel wie konventionelle Windturbinen mit Getriebe in der 2- bis 3-MW-Klasse. Gleichzeitig ist sie sehr wartungsfreundlich und extrem robust. Durch mehr Leistung bei weniger Komponenten erhöht Siemens deutlich die Verfügbarkeit und macht so die Stromerzeugung aus Windkraft noch attraktiver.

Diese drei Beispiele haben eines gemeinsam: Sie zeigen, wie unsere Mitarbeiter jeden Tag mit Engagement und Leidenschaft daran arbeiten, tragfähige Antworten auf die Herausforderungen unserer Zeit zu geben – ganz im Sinne des Pioniergeists, der bei uns seit 1847 Tradition hat und Siemens in eine erfolgreiche Zukunft führt.
