# Supplementary material
Source: publisher site journal article supplement (https://www.degruyterbrill.com/publication/isbn/9783110432879/downloadAsset/9783110432879_Elektronischer_Anhang_2.zip)
Supplement: Supplementary file 91 [file ThyssenKrupp Die Konzernmarke.pdf › Korpustexte/Korpustexte pdf/ThyssenKrupp/ThyssenKrupp Die Konzernmarke.pdf]

[ThyssenKrupp kompakt](#)[Vorstand](#)[Aufsichtsrat](#)[Compliance Programm](#)[Einkauf](#)[Business Areas](#)[Messekalender](#)[Historie](#)[Die Konzernmarke](#)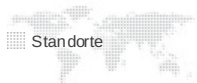[Standorte](#)[Mediaplayer](#)[Bildstreifen](#)[Publikationen](#)[Newsletter, Reminder](#)[RSS-Newsfeed](#)[Social Media](#)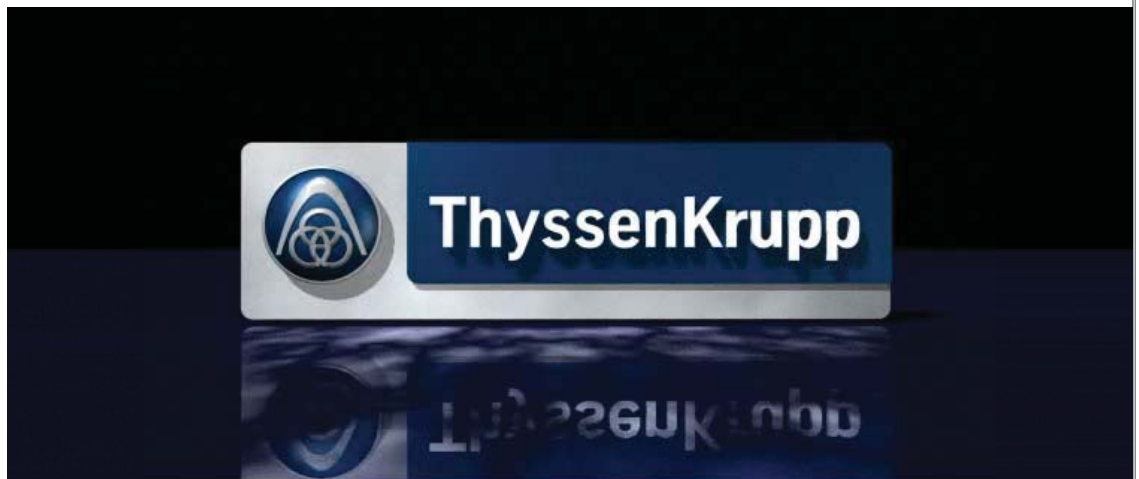

## Die Konzernmarke

Die Marke ist die Visitenkarte eines jeden Unternehmens. Sie ist ein komprimierter, erster visueller Eindruck, der weltweit ein Unternehmen unverwechselbar macht.

Unsere Konzernmarke ThyssenKrupp steht für Geschlossenheit und Stärke sowie den Qualitätsanspruch der Produkte und Leistungen des Konzerns.

Sie symbolisiert die internationale Bedeutung und Globalität des Konzerns, steht für Dynamik, Zukunftsstärke und Innovation und ist eine gemeinsame Klammer aller Mitarbeiter, die rund um den Globus arbeiten. Sie ist prägnant, verfügt über eine hohe Wiedererkennbarkeit und gewährleistet eine klare Differenzierung im Wettbewerb.

Sie ist zudem so angelegt, dass die traditionsreichen Identitätselemente - der Bogen bei Thyssen und die Drei Ringe bei Krupp – auch weiterhin bestehen bleiben.

### ThyssenKrupp Quartier

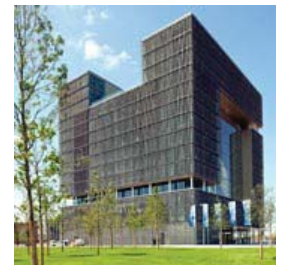[Quartier-Website](#)[Siehe auch](#)[Die Firmenzeichen \(Historie\)](#)[Nach oben](#) [Druckversion](#) [PDF-Service](#) [Teilen](#)[Home](#) | [Konzern](#) | [Innovationen & Produkte](#) | [Nachhaltigkeit](#) | [Presse](#) | [Investor Relations](#) | [Karriere](#) | [International](#)
