# Supplementary material
Source: publisher site journal article supplement (https://www.degruyterbrill.com/publication/isbn/9783110432879/downloadAsset/9783110432879_Elektronischer_Anhang_2.zip)
Supplement: Supplementary file 92 [file ThyssenKrupp GB 2010.pdf › Korpustexte/Korpustexte pdf/ThyssenKrupp/ThyssenKrupp GB 2010.pdf]

Einblicke.  
Unsere neuen Zukunftsorte.  
Für Menschen, Ideen, Lösungen.

09 10

Geschäftsbericht

Calvert  
31° 09' N  
88° 00' W

Essen  
51° 29' N  
07° 00' O

Santa Cruz  
22° 55' S  
43° 41' W

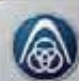

ThyssenKrupp



## ThyssenKrupp im Überblick

- 01 ..... Unsere Zahlen
- 02 ..... Der Konzern in Kürze
- 03 ..... ThyssenKrupp weltweit
- 04 ..... Die Unternehmensstruktur
- 05 ..... Unsere Business Areas
- 06 ..... Finanztermine

09 10

.....  
Geschäftsbericht



# 01 Unsere Zahlen

|                                        |       | 2008/2009 | 2009/2010 | Veränderung | Veränderung<br>in % |
|----------------------------------------|-------|-----------|-----------|-------------|---------------------|
| Auftragseingang                        | Mio € | 35.970    | 41.250    | 5.280       | 15                  |
| Umsatz                                 | Mio € | 40.563    | 42.621    | 2.058       | 5                   |
| EBITDA                                 | Mio € | 192       | 3.224     | 3.032       | —                   |
| EBIT                                   | Mio € | – 1.663   | 1.787     | 3.450       | —                   |
| Bereinigtes EBIT                       | Mio € | – 375     | 1.682     | 2.057       | —                   |
| EBT                                    | Mio € | – 2.364   | 1.135     | 3.499       | —                   |
| Bereinigtes EBT                        | Mio € | – 1.076   | 1.030     | 2.106       | —                   |
| Jahresüberschuss (+) / -fehlbetrag (–) | Mio € | – 1.873   | 927       | 2.800       | —                   |
| Ergebnis je Aktie (EPS)                | €     | – 4,01    | 1,77      | 5,78        | —                   |
| Ausschüttung                           | Mio € | 139       | 209*      | 70          | 50                  |
| Dividende je Aktie                     | €     | 0,30      | 0,45*     | 0,15        | 50                  |
| ROCE                                   | %     | – 8,1     | 8,7       | 16,8        | —                   |
| ThyssenKrupp Value Added (TKVA)        | Mio € | – 3.419   | 37        | 3.456       | —                   |
| Operating Cash-Flow                    | Mio € | 3.699     | 868       | – 2.831     | – 77                |
| Cash-Flow aus Desinvestitionen         | Mio € | 199       | 552       | 353         | —                   |
| Cash-Flow für Investitionen            | Mio € | – 4.077   | – 3.510   | 567         | – 14                |
| Free Cash-Flow                         | Mio € | – 179     | – 2.090   | – 1.911     | —                   |
| Netto-Finanzschulden                   | Mio € | 2.059     | 3.780     | 1.721       | 84                  |
| Eigenkapital                           | Mio € | 9.696     | 10.388    | 692         | 7                   |
| Gearing                                | %     | 21,2      | 36,4      | 15,2        | —                   |
| Mitarbeiter (30.09.)                   |       | 187.495   | 177.346   | – 10.149    | – 5                 |
| Inland                                 |       | 81.229    | 71.072    | – 10.157    | – 13                |
| Ausland                                |       | 106.266   | 106.274   | 8           | —                   |

\* Vorschlag an die Hauptversammlung



## 02 Der Konzern in Kürze

---

ThyssenKrupp ist ein integrierter Werkstoff- und Technologiekonzern, der seinen Kunden weltweit innovative Produkt- und Systemlösungen für nachhaltigen Fortschritt bietet. Acht Business Areas bündeln die Aktivitäten und das Know-how des Unternehmens in den strategischen Kompetenzfeldern Materials und Technologies. Eine breite Palette von Hochleistungswerkstoffen und Anlagen, Komponenten, Systemen und innovativen Dienstleistungen bildet das Leistungsprogramm. Über zwei Drittel der insgesamt 2.300 Produktionsstätten, Büros und Servicestützpunkte liegen außerhalb Deutschlands; wir bedienen Kunden in rund 80 Ländern der Welt. Unser Portfolio wird ständig optimiert, um die Ertragskraft und den Wert des Unternehmens nachhaltig zu steigern.



# 03 ThyssenKrupp weltweit

ThyssenKrupp ist ein internationaler Konzern mit starker Basis in Deutschland. Rund zwei Drittel unserer Mitarbeiter und Kunden sind außerhalb Deutschlands zu Hause; dort werden auch zwei Drittel des Umsatzes erwirtschaftet. Vor allem die europäischen Nachbarländer sind wichtige Standorte. Durch die neuen Stahl- und Weiterverarbeitungswerke haben Brasilien und die USA zusätzliche Bedeutung gewonnen: Die zwei mitarbeiterstärksten Standorte des Konzerns sind Duisburg in Deutschland und São Paulo in Brasilien. Überall in der Welt arbeiten wir daran, die Kundenzufriedenheit und damit den Konzern sowie seine Zukunftsbasis weiter zu stärken. Dazu tragen die fast 10.000 Projekte unseres Wertsteigerungsprogramms ThyssenKrupp best bei.

| UMSATZ                                   | MITARBEITER                               | THYSSENKRUPP BEST-PROJEKTE<br>in fortgeführten Aktivitäten |
|------------------------------------------|-------------------------------------------|------------------------------------------------------------|
| Weltweit<br>42,6 Mrd € Umsatz<br>100 %   | Weltweit<br>177.346 Mitarbeiter<br>100 %  | Weltweit<br>9.943 Projekte<br>100 %                        |
| EU<br>26,4 Mrd € Umsatz<br>62 %          | EU<br>106.563 Mitarbeiter<br>60 %         | EU<br>6.603 Projekte<br>66 %                               |
| Deutschland<br>13,9 Mrd € Umsatz<br>33 % | Deutschland<br>71.072 Mitarbeiter<br>40 % | Deutschland<br>4.614 Projekte<br>46 %                      |



# 04 Die Unternehmensstruktur

Um den Konzern für die wirtschaftlichen Herausforderungen der Zukunft zu stärken, hat ThyssenKrupp zum 01. Oktober 2009 eine neue Konzernorganisation umgesetzt. Das früher in fünf Segmente aufgeteilte operative Geschäft ist nun in acht Business Areas gegliedert. Die wesentlichen strategischen Kompetenzfelder markieren zwei Divisions – Materials und Technologies; sie dienen als inhaltliche Klammern für jeweils vier Business Areas. Die neue Organisation ermöglicht schnellere Entscheidungen und eine intensivere Zusammenarbeit innerhalb des Konzerns, sie erhöht die Transparenz nach innen und außen. Damit können wir marktnäher agieren, operative sowie strategische Maßnahmen unmittelbarer umsetzen und nachhaltig Kosten senken. So machen wir den Konzern fit für die Zukunft.

## THYSSENKRUPP KONZERN

### Corporate Headquarter

|                 |
|-----------------|
| ThyssenKrupp AG |
|-----------------|

### Business Areas

| Division Materials |                |                  |                    | Division Technologies |                  |                       |                |
|--------------------|----------------|------------------|--------------------|-----------------------|------------------|-----------------------|----------------|
| Steel Europe       | Steel Americas | Stainless Global | Materials Services | Elevator Technology   | Plant Technology | Components Technology | Marine Systems |

### Business Services

|                                |
|--------------------------------|
| ThyssenKrupp Business Services |
| ThyssenKrupp IT Services       |



## 05 Unsere Business Areas

---

Insgesamt acht Business Areas stehen für die konzernweiten Kompetenzen, Aktivitäten und Angebote rund um Werkstoffe und Technologien. Sie fassen gleiche Geschäftsmodelle und regional zusammenhängende Geschäftsaktivitäten zusammen. Die Business Areas werden durch Bereichsvorstände geführt, die deren operative Steuerung und kontinuierliche Geschäftsentwicklung in enger Abstimmung mit dem Vorstand der ThyssenKrupp AG verantworten. Diese Anbindung ermöglicht eine direktere Ausrichtung an der Gesamtstrategie des Konzerns und stärkt das Unternehmen für den globalen Wettbewerb der Zukunft.

### **DIVISION MATERIALS**

---

#### **Steel Europe**

- Qualitätsflachprodukte für Premium-Markt
- Von intelligenten Werkstofflösungen bis zu fertigen Bauteilen

#### **Steel Americas**

- Hochwertige Stahlprodukte für den amerikanischen Markt
- Stahl- und Weiterverarbeitungswerke in Brasilien und den USA

#### **Stainless Global**

- Weltweiter Edelstahlproduzent
- Anbieter von Hochleistungswerkstoffen wie Nickellegierungen und Titan

#### **Materials Services**

- Werkstoffdienstleistungen in über 40 Ländern
  - Integriertes Supply-Chain-Management als umfassendes Serviceangebot
- 

### **DIVISION TECHNOLOGIES**

---

#### **Elevator Technology**

- Innovative Mobilitätslösungen
- Aufzüge, Fahrtreppen und -steige, Fluggastbrücken und Treppenaufzüge

#### **Plant Technology**

- International renommierter Anbieter im Spezial- und Großanlagenbau
- Anlagen und Verfahren für mehr Umweltschutz und Nachhaltigkeit

#### **Components Technology**

- Komponenten für Automobilindustrie, Bausektor und Maschinenbau
- Innovativer Spezialist mit breiter Produktpalette

#### **Marine Systems**

- Global agierender Systemanbieter
  - Spezielle Kompetenz für U-Boote und Marineschiffe
-



# 06 Finanztermine

Wichtige Termine finden Sie auch online in unserem Finanzkalender:  
[www.thyssenkrupp.com/de/investor/finanzkalender.html](http://www.thyssenkrupp.com/de/investor/finanzkalender.html)  
Wenn Sie sich regelmäßig über Neues bei ThyssenKrupp informieren wollen, abonnieren Sie unseren Newsletter unter [www.thyssenkrupp.com/de/newsletter/index.html](http://www.thyssenkrupp.com/de/newsletter/index.html)

## TERMINE

---

|                   |                                                                                                                |
|-------------------|----------------------------------------------------------------------------------------------------------------|
| 21. Januar 2011   | Ordentliche Hauptversammlung                                                                                   |
| 24. Januar 2011   | Zahlung der Dividende für das Geschäftsjahr 2009/2010                                                          |
| 11. Februar 2011  | Zwischenbericht 1. Quartal 2010 / 2011 (Oktober bis Dezember)<br>Telefonkonferenz mit Analysten und Investoren |
| 13. Mai 2011      | Zwischenbericht 1. Halbjahr 2010 / 2011 (Oktober bis März)<br>Analysten- und Investorenkonferenz               |
| 12. August 2011   | Zwischenbericht 9 Monate 2010 / 2011 (Oktober bis Juni)<br>Telefonkonferenz mit Analysten und Investoren       |
| 06. Dezember 2011 | Bilanzpressekonferenz<br>Analysten- und Investorenkonferenz                                                    |
| 20. Januar 2012   | Ordentliche Hauptversammlung                                                                                   |

---



**ThyssenKrupp AG**

ThyssenKrupp Allee 1

45143 Essen

[www.thyssenkrupp.com](http://www.thyssenkrupp.com)



*Sehr geehrte Aktionärinnen und Aktionäre,*

vor einem Jahr habe ich Ihnen an dieser Stelle über das bisher schwierigste Jahr in der Geschichte von ThyssenKrupp berichtet. Es fiel mir nicht leicht, den Milliarden-Euro-Verlust zu erläutern. Meinen Glauben an die Stärken von ThyssenKrupp und meine Zuversicht in die Zukunft des Unternehmens hatte ich aber nie verloren, denn wir haben umgehend mit einem umfangreichen Maßnahmenpaket gegengesteuert. Deshalb konnte ich Ihnen damals auch versichern, dass Ihr Unternehmen aus der Krise gestärkt hervorgehen und – sobald der Konjunkturmotor wieder anspringt – an die erfolgreiche Entwicklung der vergangenen Jahre anknüpfen wird. Das haben wir im abgelaufenen Geschäftsjahr 2009/2010 in der Tat geschafft, und über die wesentlichen Fortschritte möchte ich Sie an dieser Stelle informieren.

#### UNSERE WERKE IN AMERIKA SIND ERFOLGREICH GESTARTET

Im Juni 2010 haben wir unser neues integriertes Hüttenwerk in Brasilien in Betrieb genommen. Es ist die größte industrielle Investition der letzten zehn Jahre in Brasilien und zugleich das bisher größte Projekt für ThyssenKrupp – das Investitionsvolumen liegt bei 5,2 Mrd €. Für die Umsetzung unserer Wachstumsstrategie bei hochwertigem Qualitätsflachstahl ist das Werk von zentraler Bedeutung: Es wird nach dem Hochlauf rund 5 Mio t Brammen jährlich für unsere Weiterverarbeitungswerke im us-Bundesstaat Alabama und in Deutschland produzieren – und zwar mit höchsten Qualitätsstandards und zu optimierten Kosten. Der Hochlauf verläuft erfolgreich, der erste Hochofen produziert seit Ende Juli 2010 täglich bis zu 6.500 t Roheisen. Die ersten Brammen sind im Oktober auch in Europa angekommen und haben unsere Qualitätserwartungen voll erfüllt.

Fast gleichzeitig hat die Warmbreitbandstraße in unserem neuen Qualitätsflachstahlwerk in Alabama die Produktion aufgenommen. Sie ist das Kernstück des Werkes mit einem Gesamt-Investitionsvolumen von 3,6 Mrd us-Dollar. Erste Aufträge von Warm- und Kaltband wurden an us-amerikanische Kunden ausgeliefert, die Resonanz ist sehr gut. Die nachgeschalteten Weiterverarbeitungs- und Veredelungsanlagen werden schrittweise fertiggestellt; sie sind so ausgelegt, dass höchste Qualitätsansprüche industrieller Kunden, z.B. im Automobilbau, erfüllt werden können.

Auch unser neues Edelstahl-Walzwerk in Alabama ist jetzt in Betrieb. Seit Oktober 2010 produziert das Kaltwalzgerüst zunächst jährlich rund 100.000 t Kaltband, die auf 140.000 t ausgeweitet werden können. Weitere Aggregate sind im Bau. Nach der Fertigstellung wird das Werk die breiteste Produktabmessung auf dem us-Markt anbieten. Das Investitionsvolumen für das integrierte Rostfrei-Werk liegt bei 1,4 Mrd us-Dollar. Die Gesamtkapazität soll später 1 Mio t Brammen pro Jahr betragen.

Und was für alle drei Werke von besonderer Bedeutung ist: Die in der Hauptversammlung 2010 kommunizierten Budgets halten wir ein, die Wirtschaftlichkeit ist trotz höherer Investitionskosten als ursprünglich geplant gegeben. Wir haben an allen drei Projekten ungeachtet der jüngsten Wirtschaftskrise grundsätzlich festgehalten, denn wir sind von deren industrieller Sinnhaftigkeit und strategischer Bedeutung für die Zukunft von ThyssenKrupp weiterhin fest überzeugt. Langfristig bietet der NAFTA-Markt unverändert attraktive Absatzchancen. Der erfolgreiche Anlauf und die rege Kundenresonanz sind die beste Bestätigung für unsere Strategie.

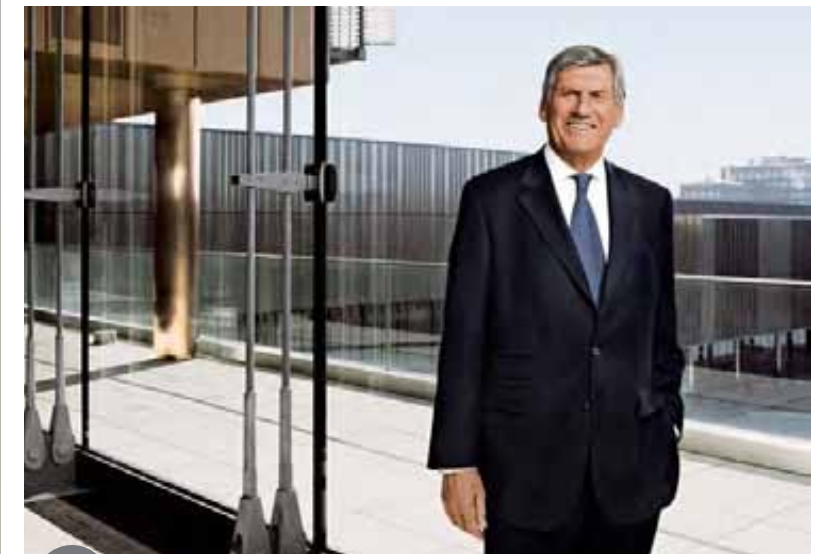

Abb. 01

Dr.-Ing. Ekkehard D. Schulz, Vorsitzender des Vorstands,  
aufgenommen am 11.10.2010 im ThyssenKrupp Quartier, Essen.



Einblicke.  
Unsere neuen Zukunftsorte.  
Für Menschen, Ideen, Lösungen.

**Essen, Deutschland** 51° 29' N , 07° 00' O Auf historischem Grund entstand mit dem ThyssenKrupp Quartier ein neues Herzstück des Konzerns, das Verwaltungsstandorte bündelt und durch Förderung von Dialog und Austausch die Innovationsfähigkeit des Unternehmens weiter steigert.

ENTDECKEN SIE MEHR IM MAGAZIN AB SEITE 04.

**Santa Cruz, Brasilien** 22° 55' S , 43° 41' W Eines der umwelt-schonendsten und modernsten Stahlwerke weltweit nutzt kurze Wege zu Rohstoffvorkommen und trägt so durch konkurrenzfähige Angebote dazu bei, die globale Top-Position von ThyssenKrupp im Markt für hochwertigen Qualitätsflachstahl weiter auszubauen.

ENTDECKEN SIE MEHR IM MAGAZIN AB SEITE 14.

**Calvert, USA** 31° 09' N , 88° 00' W Die modernste Verarbeitungs-anlage weltweit für hochwertigen Qualitätsflachstahl und Edelstahl-Flachprodukte liegt strategisch günstig im Zentrum des NAFTA-Raums und eröffnet ThyssenKrupp in der Region einen umfassenderen Marktzugang und mehr Nähe zu den Kunden und deren Bedürfnissen.

ENTDECKEN SIE MEHR IM MAGAZIN AB SEITE 24.



## *Sehr geehrte Aktionärinnen und Aktionäre,*

vor einem Jahr habe ich Ihnen an dieser Stelle über das bisher schwierigste Jahr in der Geschichte von ThyssenKrupp berichtet. Es fiel mir nicht leicht, den Milliarden-Euro-Verlust zu erläutern. Meinen Glauben an die Stärken von ThyssenKrupp und meine Zuversicht in die Zukunft des Unternehmens hatte ich aber nie verloren, denn wir haben umgehend mit einem umfangreichen Maßnahmenpaket gegengesteuert. Deshalb konnte ich Ihnen damals auch versichern, dass Ihr Unternehmen aus der Krise gestärkt hervorgehen und – sobald der Konjunkturmotor wieder anspringt – an die erfolgreiche Entwicklung der vergangenen Jahre anknüpfen wird. Das haben wir im abgelaufenen Geschäftsjahr 2009/2010 in der Tat geschafft, und über die wesentlichen Fortschritte möchte ich Sie an dieser Stelle informieren.

### **UNSERE WERKE IN AMERIKA SIND ERFOLGREICH GESTARTET**

Im Juni 2010 haben wir unser neues integriertes Hüttenwerk in Brasilien in Betrieb genommen. Es ist die größte industrielle Investition der letzten zehn Jahre in Brasilien und zugleich das bisher größte Projekt für ThyssenKrupp – das Investitionsvolumen liegt bei 5,2 Mrd €. Für die Umsetzung unserer Wachstumsstrategie bei hochwertigem Qualitätsflachstahl ist das Werk von zentraler Bedeutung: Es wird nach dem Hochlauf rund 5 Mio t Brammen jährlich für unsere Weiterverarbeitungswerke im us-Bundesstaat Alabama und in Deutschland produzieren – und zwar mit höchsten Qualitätsstandards und zu optimierten Kosten. Der Hochlauf verläuft erfolgreich, der erste Hochofen produziert seit Ende Juli 2010 täglich bis zu 6.500 t Roheisen. Die ersten Brammen sind im Oktober auch in Europa angekommen und haben unsere Qualitätserwartungen voll erfüllt.

Fast gleichzeitig hat die Warmbreitbandstraße in unserem neuen Qualitätsflachstahlwerk in Alabama die Produktion aufgenommen. Sie ist das Kernstück des Werkes mit einem Gesamt-Investitionsvolumen von 3,6 Mrd us-Dollar. Erste Aufträge von Warm- und Kaltband wurden an us-amerikanische Kunden ausgeliefert, die Resonanz ist sehr gut. Die nachgeschalteten Weiterverarbeitungs- und Veredelungsanlagen werden schrittweise fertiggestellt; sie sind so ausgelegt, dass höchste Qualitätsansprüche industrieller Kunden, z. B. im Automobilbau, erfüllt werden können.

Auch unser neues Edelstahl-Walzwerk in Alabama ist jetzt in Betrieb. Seit Oktober 2010 produziert das Kaltwalzgerüst zunächst jährlich rund 100.000 t Kaltband, die auf 140.000 t ausgeweitet werden können. Weitere Aggregate sind im Bau. Nach der Fertigstellung wird das Werk die breiteste Produktabmessung auf dem us-Markt anbieten. Das Investitionsvolumen für das integrierte Rostfrei-Werk liegt bei 1,4 Mrd us-Dollar. Die Gesamtkapazität soll später 1 Mio t Brammen pro Jahr betragen.

Und was für alle drei Werke von besonderer Bedeutung ist: Die in der Hauptversammlung 2010 kommunizierten Budgets halten wir ein, die Wirtschaftlichkeit ist trotz höherer Investitionskosten als ursprünglich geplant gegeben. Wir haben an allen drei Projekten ungeachtet der jüngsten Wirtschaftskrise grundsätzlich festgehalten, denn wir sind von deren industrieller Sinnhaftigkeit und strategischer Bedeutung für die Zukunft von ThyssenKrupp weiterhin fest überzeugt. Langfristig bietet der NAFTA-Markt unverändert attraktive Absatzchancen. Der erfolgreiche Anlauf und die rege Kundenresonanz sind die beste Bestätigung für unsere Strategie.



## **THYSSENKRUPP HAT 2009/2010 WIEDER MIT GEWINN GEARBEITET**

Unser operatives Geschäft hat sich 2009/2010 erfreulich entwickelt. Nach den gravierenden Nachfrageeinbrüchen als Folge der Wirtschafts- und Finanzkrise haben unsere Kunden in den letzten zwölf Monaten wieder mehr bestellt: Der Auftragseingang erreichte mit 41,3 Mrd € ein Plus von 15 % im Vergleich zum Vorjahr, der Umsatz stieg um 5 % auf 42,6 Mrd €. Der Gewinn vor Steuern betrug 1,1 Mrd €, nachdem wir im Vorjahr noch einen Vorsteuerverlust von 2,4 Mrd € verbuchen mussten. Neben der konjunkturellen Erholung hatte diese Ergebniswende eine weitere wesentliche Ursache: beträchtliche Kostensenkungen. Wir haben auch 2009/2010 nicht nachgelassen, eine Vielzahl interner Maßnahmen zur Effizienzsteigerung, Strukturoptimierung und Kostensenkung umzusetzen. Der Gesamteffekt belief sich auf rund 1,5 Mrd € nach 0,8 Mrd € im Vorjahr. Zudem konnten wir die Netto-Finanzschulden zum 30. September 2010 auf rund 3,8 Mrd € begrenzen.

An dieser positiven Entwicklung wollen wir auch unsere Aktionäre angemessen beteiligen. Vorstand und Aufsichtsrat werden daher der Hauptversammlung im Januar 2011 vorschlagen, für das abgelaufene Geschäftsjahr eine auf 0,45 € erhöhte Dividende je Stückaktie auszuschütten.

## **DIE NEUE KONZERNORGANISATION HAT SICH BEWÄHRT**

Zu Beginn des Berichtsjahres haben wir die neue Konzernorganisation eingeführt; ich hatte Ihnen darüber schon im Vorjahr berichtet. Den acht Business Areas bekommt die neue Eigenständigkeit gut, denn sie können sich nun bei ihren Kunden im Markt klarer positionieren. Ihre direkte Anbindung an die Konzernzentrale bringt zudem den Vorteil kürzerer interner Entscheidungswege. Auch der Kapitalmarkt hat die neue Organisation positiv aufgenommen und schätzt die höhere Transparenz und Fokussierung unserer Berichterstattung.

Ein Zeichen mit Symbolcharakter war im Sommer 2010 der Umzug der Konzernzentrale und weiterer Konzernbereiche in das neue ThyssenKrupp Quartier in Essen. An einem Standort konzentriert, kann das Headquarter künftig spürbar effizienter und kostengünstiger arbeiten. Zudem hat sich das Quartier schnell zu einer zentralen Begegnungs- und Tagungsstätte für ThyssenKrupp Unternehmen, Mitarbeiter und Führungskräfte aus aller Welt entwickelt. Auch architektonisch setzt das Quartier Zeichen – hochmodern, funktional, energieeffizient und durch die Verwendung innovativer ThyssenKrupp Produkte in vielen Aspekten zukunftsweisend.

## **MIT ANSPRUCHSVOLLEN ZIELEN INS NEUE GESCHÄFTSJAHR**

Wie Sie sehen, meine Damen und Herren, hat ThyssenKrupp im abgelaufenen Geschäftsjahr im weiterhin schwierigen Umfeld viel erreicht. Damit haben wir eine gute Ausgangsbasis für weiteres Wachstum geschaffen. Im Geschäftsjahr 2010/2011 wollen wir diesen Weg weitergehen, wie im Ausblick des vorliegenden Geschäftsberichts näher erläutert wird: Wir erwarten eine Steigerung des Konzernumsatzes um etwa 10 % bis 15 %, im abgelaufenen Jahr lag er bei 42,6 Mrd €. Die Zielmarke für das bereinigte Ergebnis vor Steuern und Zinsen, eine wesentliche künftige Steuerungsgröße, liegt bei 2 Mrd € – nach 1,2 Mrd € im Vorjahr. Um dies zu erreichen, werden wir unsere



Konzernstrukturen weiter verbessern. Dazu gehören neben Effizienzsteigerungen und Kostensenkungen auch weitere Portfoliooptimierungen sowie eine weitere Internationalisierung unserer Aktivitäten. Voraussetzung für die Zielerreichung ist eine weiter stabile Entwicklung der Weltwirtschaft.

Die Fertigstellung, der Hochlauf und die weitere Entwicklung unserer Stahl- und Weiterverarbeitungswerke in Brasilien und den USA werden je nach Erholung des nordamerikanischen Marktes flexibel gesteuert. Die Bewährung im Markt und Wettbewerb ist schließlich der Schlüssel für den Erfolg unserer Wachstumsstrategien in den Business Areas der Division Materials.

In der Division Technologies prägen die globalen Megatrends die künftige Nachfrage. Ob Ressourcenschonung, Infrastrukturausbau für die wachsende Weltbevölkerung oder Fragen der Mobilität, ThyssenKrupp Unternehmen bieten schon heute viele zukunftsweisende Lösungen. Und sie bauen ihre technologische Kompetenz weiter aus, um die Marktpotenziale noch besser zu erschließen.

Es steht uns ein weiteres arbeitsreiches Jahr bevor. Ich bin mir aber sicher, dass ThyssenKrupp seine Ziele erreichen wird. Gerade 2011, im Jahr des 200jährigen Bestehens der Gussstahlfabrik Fried. Krupp, wollen wir eine Erfolgsbilanz vorlegen – und damit ein Zeichen für Wettbewerbsstärke, Kompetenz und Nachhaltigkeit setzen.

Mit Ablauf der Hauptversammlung am 21. Januar 2011 wird Dr. Heinrich Hiesinger, der bereits seit dem 01. Oktober 2010 dem Vorstand der ThyssenKrupp AG angehört, den Vorstandsvorsitz übernehmen. Zudem wird Dr. Jürgen Claassen, bisher Generalbevollmächtigter der Gesellschaft, in den Vorstand eintreten. Ich wünsche der neuen Führungsmannschaft sowie den Mitarbeiterinnen und Mitarbeitern von ThyssenKrupp viel Erfolg. Ihnen, sehr geehrte Aktionärinnen und Aktionäre, Freunde und Partner des Konzerns, möchte ich für Ihre wohlwollende Begleitung des Unternehmens unter meiner Leitung in den vergangenen fast zwölf Jahren ganz herzlich danken. Halten Sie ThyssenKrupp weiterhin die Treue; es lohnt sich. Unser Unternehmen ist und bleibt ein langfristig solides und attraktives Investment, ein innovativer Geschäftspartner und ein verantwortungsbewusstes Mitglied unserer Gesellschaft.

Mit freundlichen Grüßen



DR.-ING. EKKEHARD D. SCHULZ  
Vorsitzender des Vorstands  
Essen, November 2010



Einblicke.  
Unsere neuen Zukunftsorte.  
Für Menschen, Ideen, Lösungen.

Magazin zum  
Geschäftsbericht

09 10

Deutschland. Brasilien. USA. Drei Orte, drei Kulturkreise,  
ein gemeinsamer Gedanke: Weltweit den Kunden über-  
zeugende Leistungen bieten durch Nutzung regionaler  
Stärken und globaler Netzwerke.



Willkommen an unseren neuen Zukunftsorten:  
Wir laden Sie ein, mehr zu entdecken. Und zu erfahren,  
warum unsere aktuellen Engagements in Brasilien, USA  
und Europa für das Unternehmen, für die Menschen und  
für die Regionen gut sind.



ESSEN, DEUTSCHLAND  
ERÖFFNUNG AM 17.06.2010



SANTA CRUZ, BRASILIEN  
ERÖFFNUNG AM 18.06.2010



CALVERT, USA  
ERÖFFNUNG AM 10.12.2010



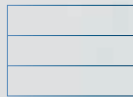

51° 29' N , 07° 00' O

THYSSENKRUPP QUARTIER, ESSEN, DEUTSCHLAND

## Eine neue Zentrale für ein offenes Miteinander

S. 04

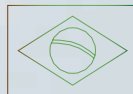

22° 55' S , 43° 41' W

THYSSENKRUPP CSA SIDERÚRGICA DO ATLÂNTICO,  
SANTA CRUZ, BRASILIEN

## Eine neue Produktionsstätte zwischen Rohstoffen und Märkten

S. 14

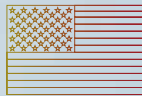

31° 09' N , 88° 00' W

THYSSENKRUPP STEEL USA UND THYSSENKRUPP STAINLESS USA,  
CALVERT, ALABAMA, USA

## Eine neue Verarbeitungsanlage nah am Kunden

S. 24

VOM AUSTAUSCH PROFITIEREN  
Unsere neuen Standorte im Überblick

S. 34



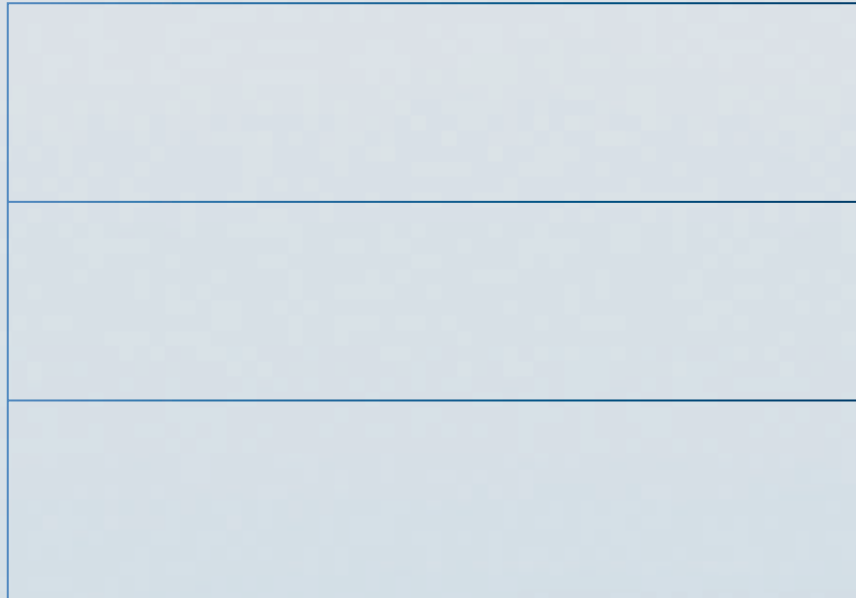

THYSSENKRUPP QUARTIER

51° 29' N 07° 00' O

# Essen Deutschland

ThyssenKrupp kehrt an einen traditionsreichen Standort zurück: Mit einer neuen Hauptverwaltung, die Unternehmenskultur baulich umsetzt.

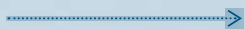OFFENHEIT  
IM ZENTRUM

S.07

GEBaute  
NACHHALTIGKEIT

S.10

RAUM FÜR  
INSPIRATION

S.12



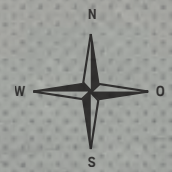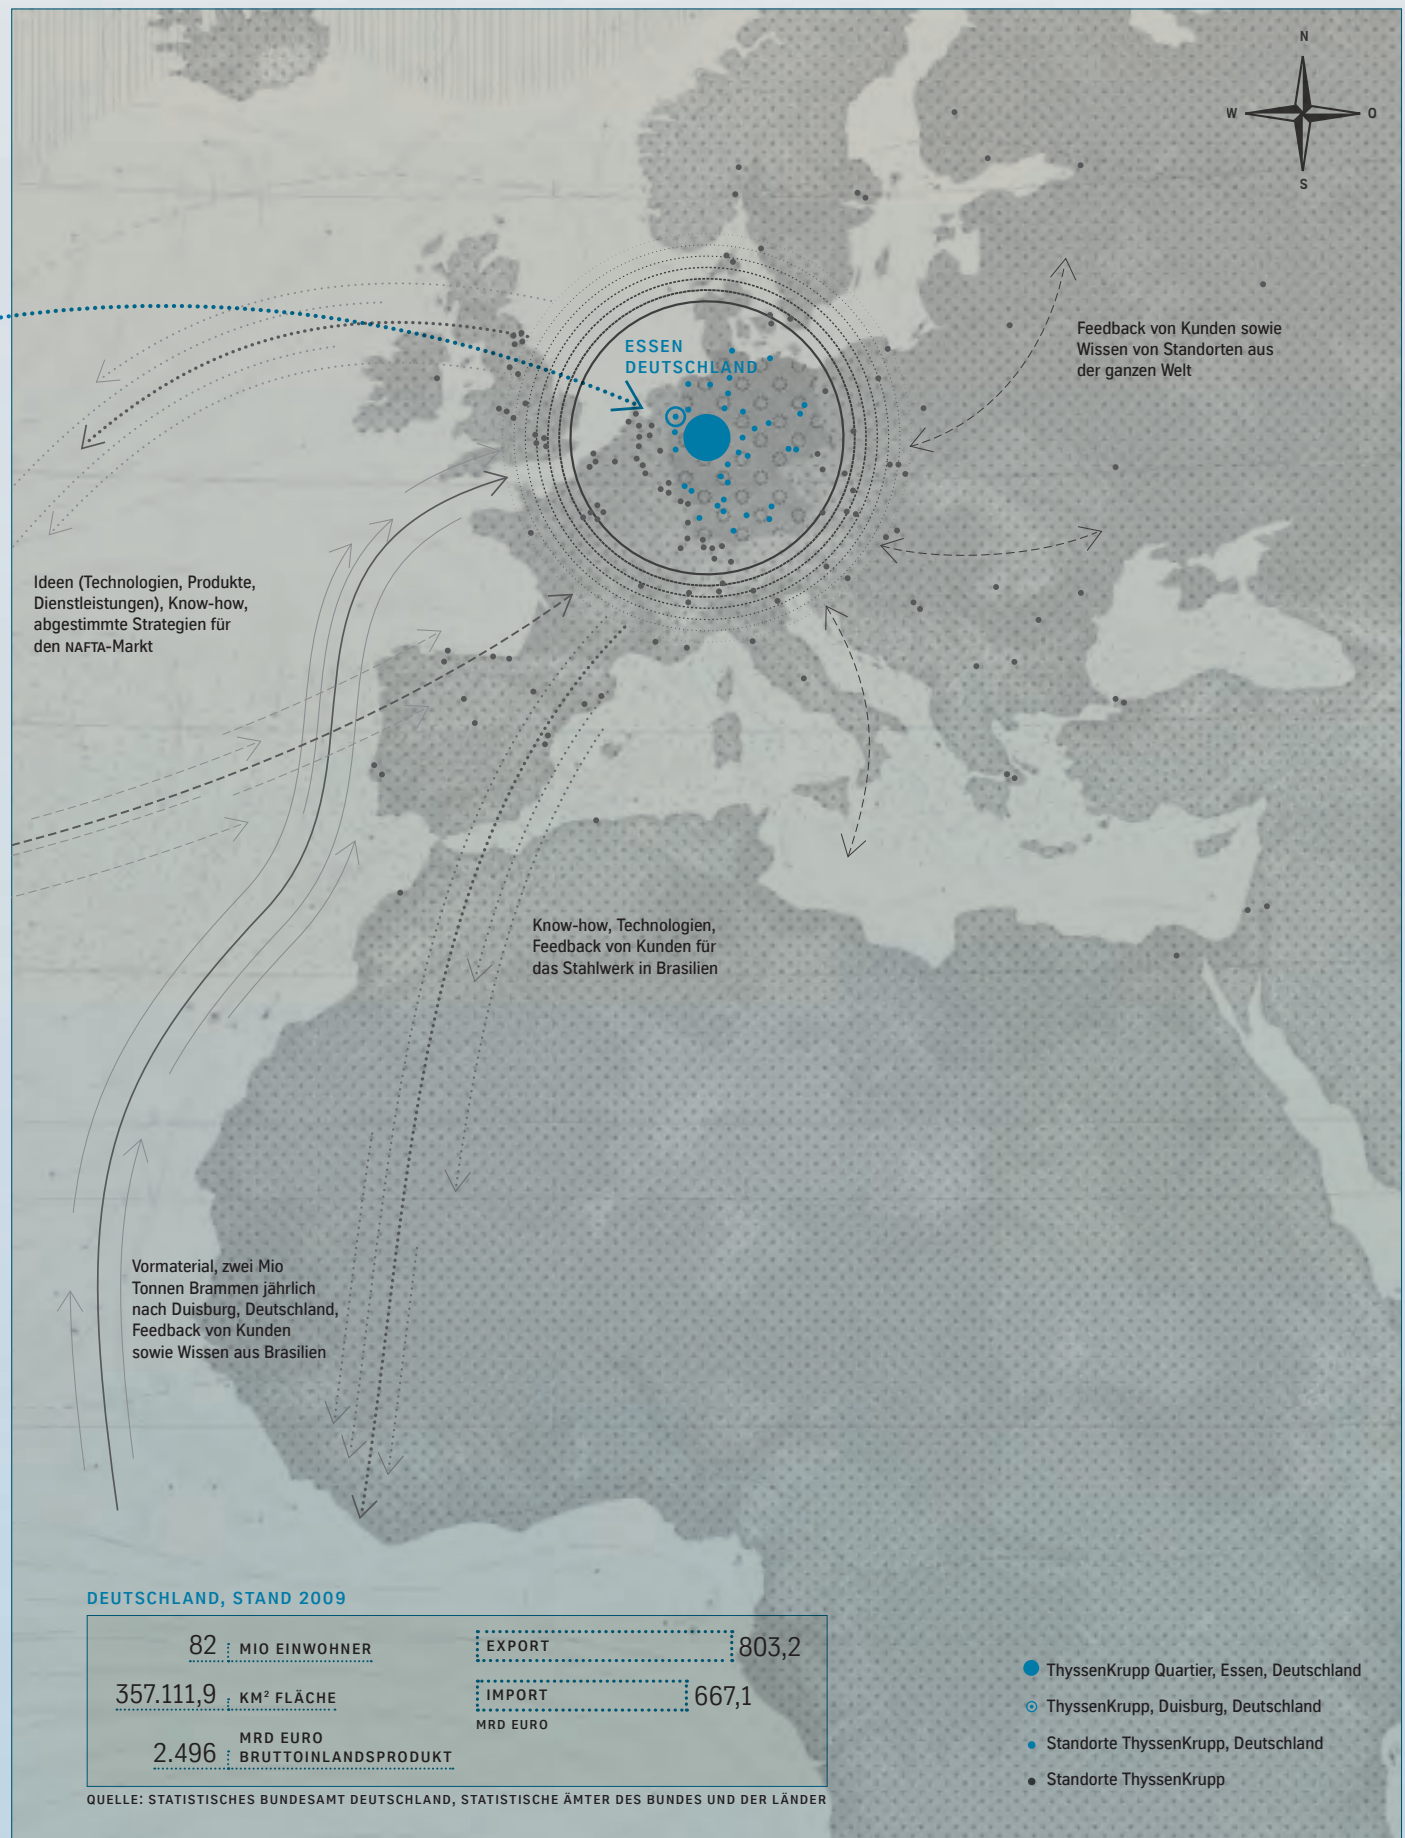



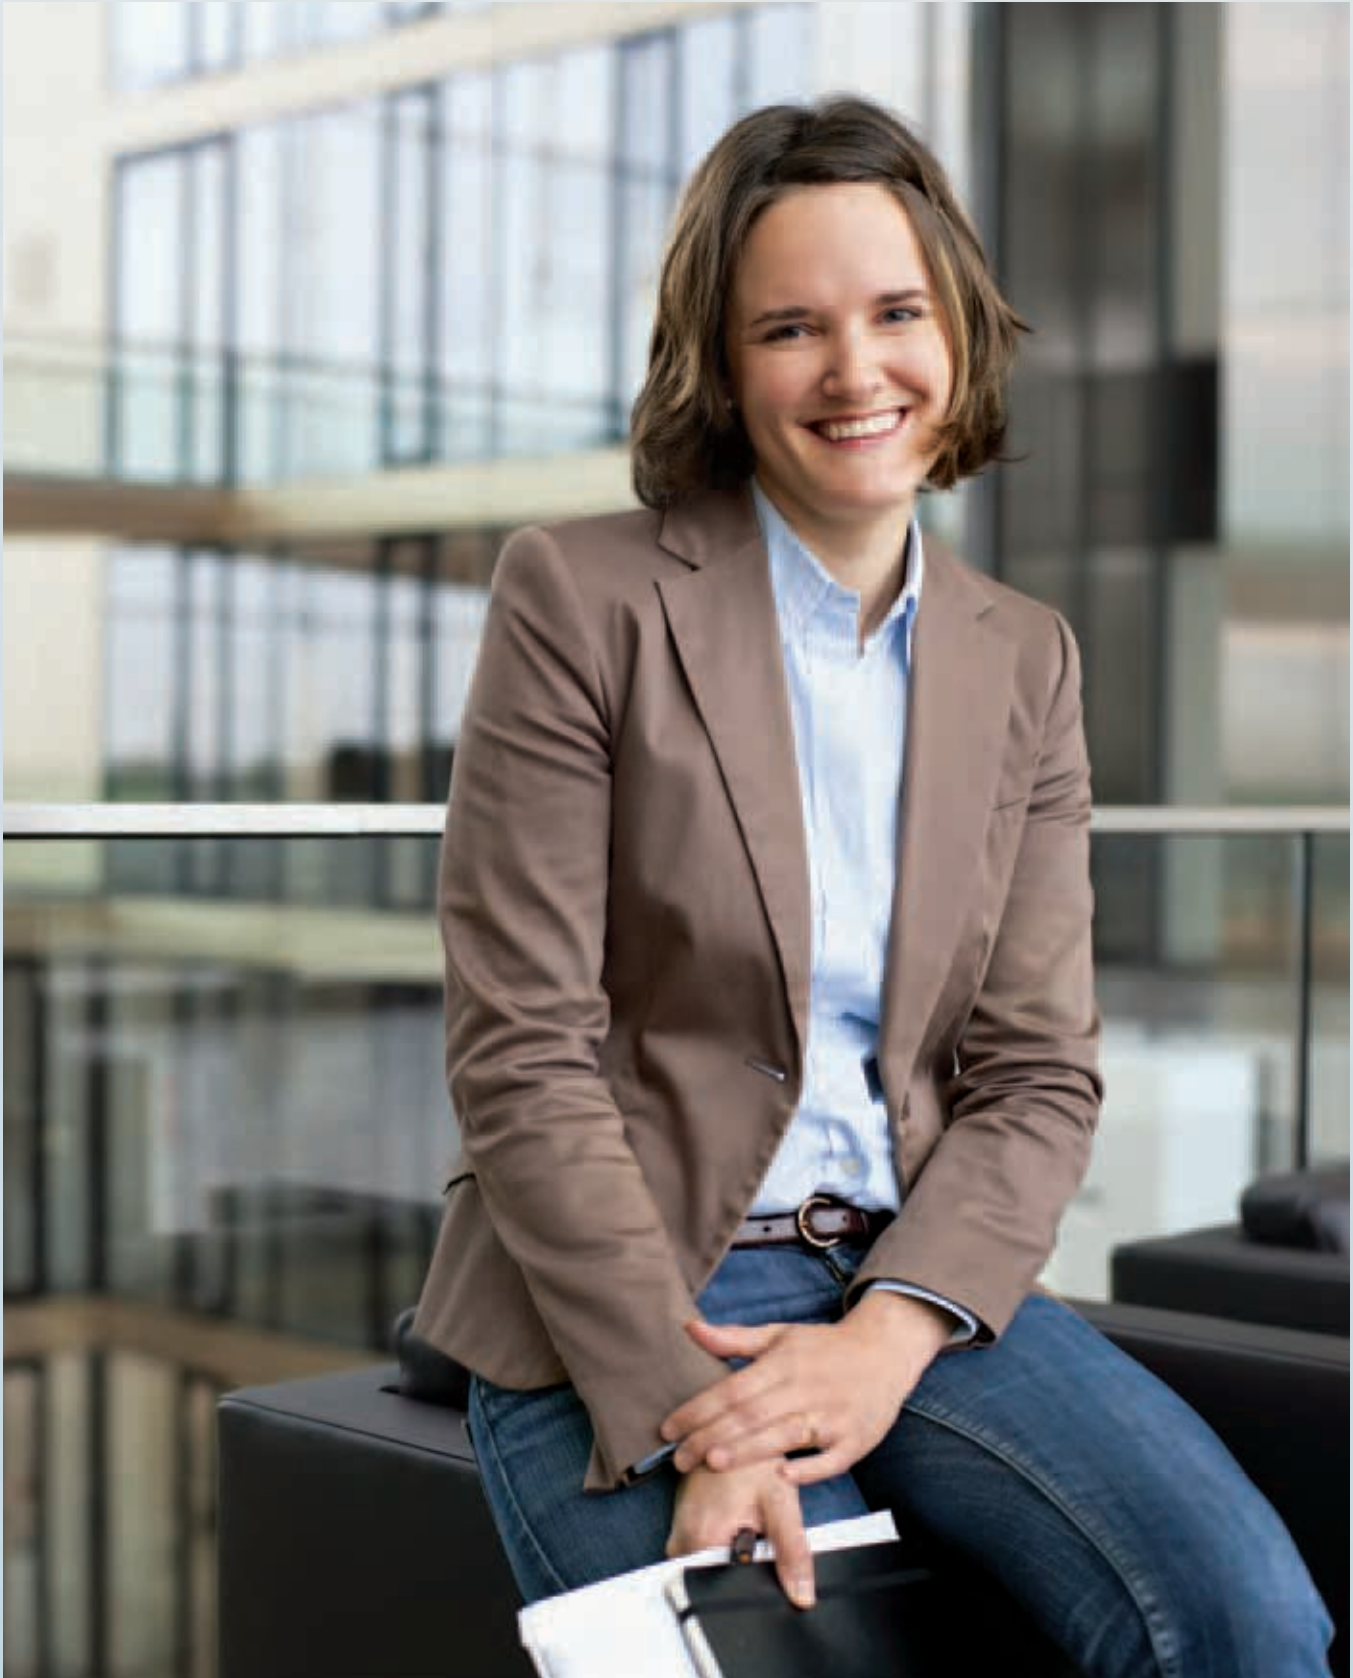

Abb. 01

Katharina Thörner, Architektin ThyssenKrupp, wirkte an der Umsetzung des architektonischen Konzepts mit, das Unternehmenswerte wie Offenheit und Transparenz transportiert.



*Die Transparenz der Architektur  
fördert Dialog und Austausch, das  
Entwickeln von Ideen und Innovationen.*

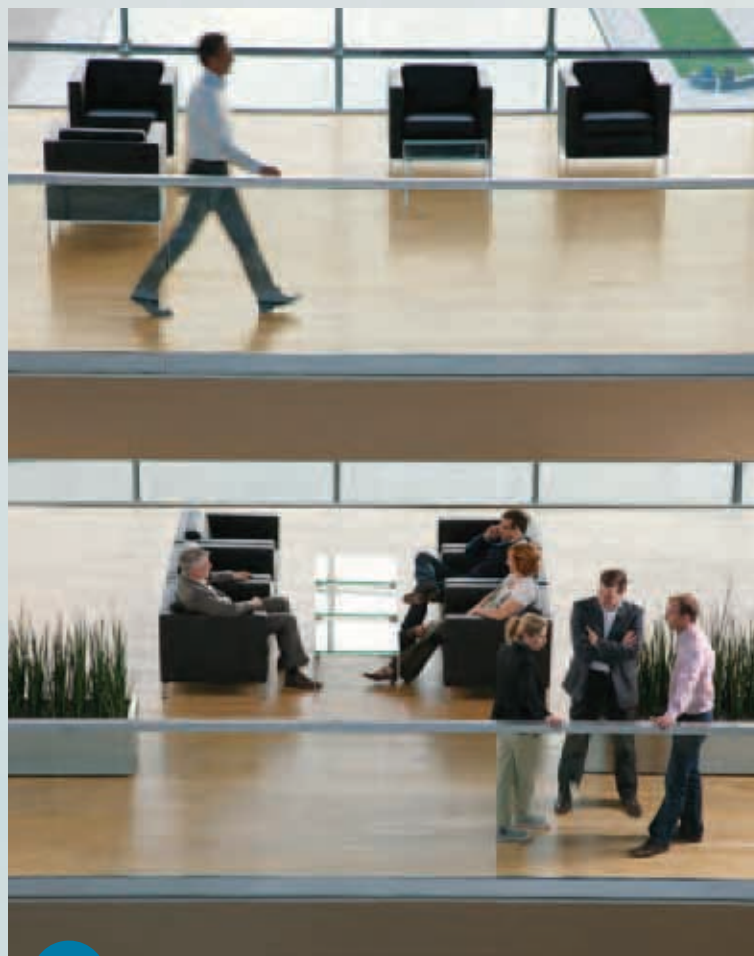

Abb. 02

Offene Zonen laden im ThyssenKrupp  
Quartier zur Begegnung ein.

#### OFFENHEIT IM ZENTRUM

Das ThyssenKrupp Quartier fasst mehrere Verwaltungen an einem Standort zusammen und lässt damit ein neues Herzstück des gesamten Konzerns entstehen. Als Aufbruch in eine neue Zeit steht das Quartier auch für die gelebte Internationalität des Unternehmens: Es bietet Mitarbeitern, Kunden und Partnern aus aller Welt einen gemeinsamen Ort für Begegnung und Dialog [ABB. 02](#). In mehreren Baukörpern schafft die offene, moderne Architektur für die hier beschäftigten Mitarbeiterinnen und Mitarbeiter Raum zum Entwickeln von Ideen und das Realisieren von Innovationen. Konsequentermaßen ist es, ein kreatives, nachhaltig anregendes Umfeld zu schaffen, das hilft, das Wissen Einzelner gemeinsam zu nutzen. —→



3.000 : ARBEITSPLÄTZE IM QUARTIER  
UND IN DER UMGEBUNG

100.000 m<sup>2</sup> : NUTZFLÄCHE

66% : DES GELÄNDES BLIEBEN UNVERSIEGELT

: ERDWÄRME ZUM HEIZEN UND KÜHLEN

: AUSGEZEICHNET MIT DEM VORZERTIFIKAT  
: IN GOLD FÜR NACHHALTIGES BAUEN

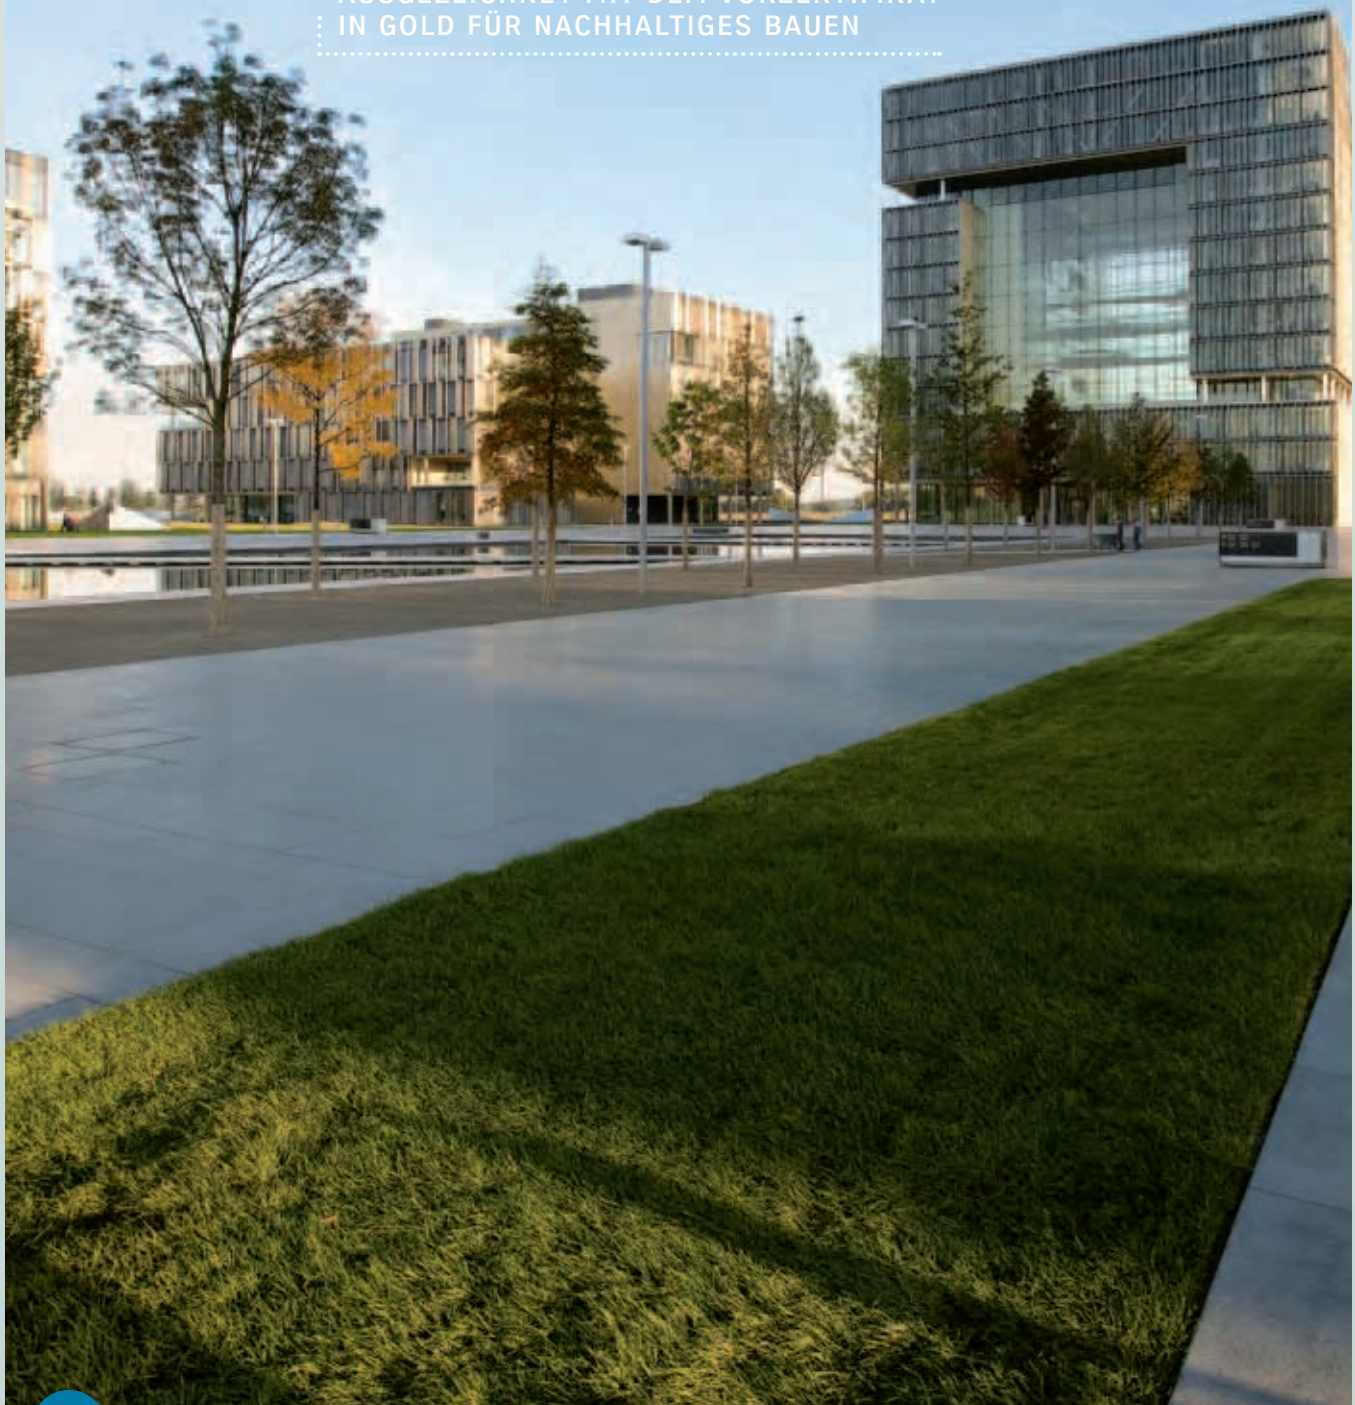



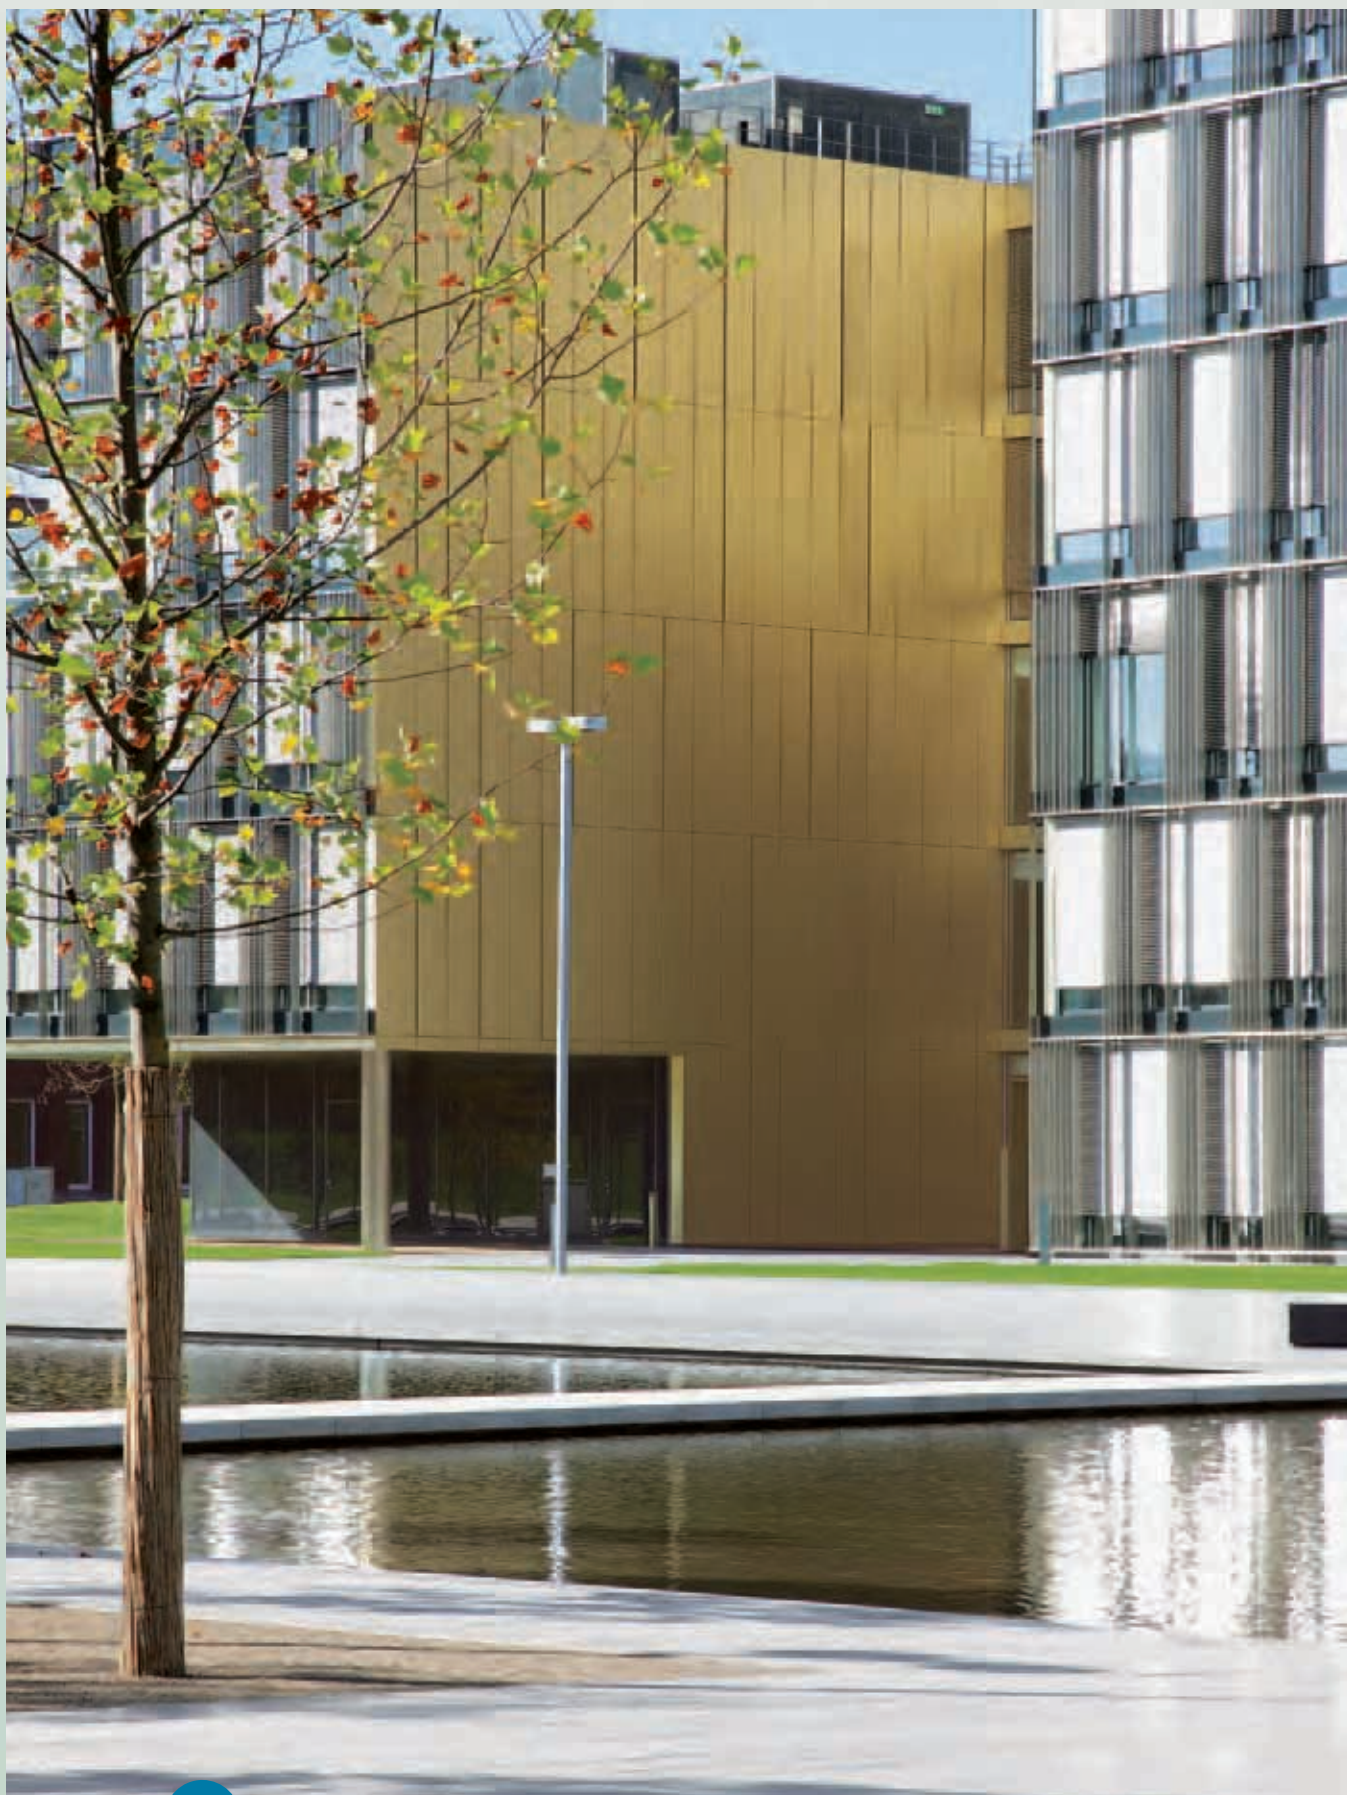



*Nachhaltigkeit ist im Quartier gebautes  
Selbstverständnis.*

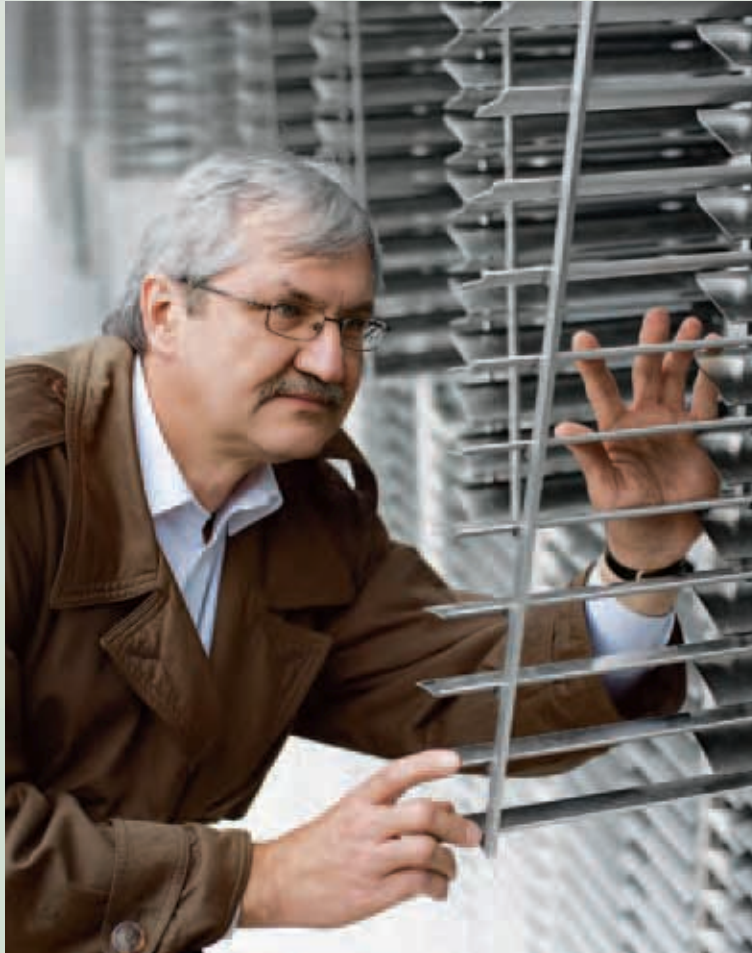

Abb. 05

Gert Weiß, Leiter Produktservice ThyssenKrupp Nirosta,  
steckte seine Werkstoffkompetenz in ein innovatives  
Sonnenschutzsystem.

#### GEBAUTE NACHHALTIGKEIT

Mit Ressourcen wird im ThyssenKrupp Quartier schonend umgegangen. So wird im Erdreich gespeicherte Wärme zum Heizen und Kühlen genutzt, und aus der Abluft der Büros wird Wärmeenergie zurückgewonnen. Der Energieverbrauch liegt deshalb 20 bis 30 % unter den gesetzlichen Vorgaben. Rund 700 Bäume, zahlreiche Grünflächen und eine über 200 Meter lange und 30 Meter breite Wasserachse verbessern das Kleinklima des Areals. —>



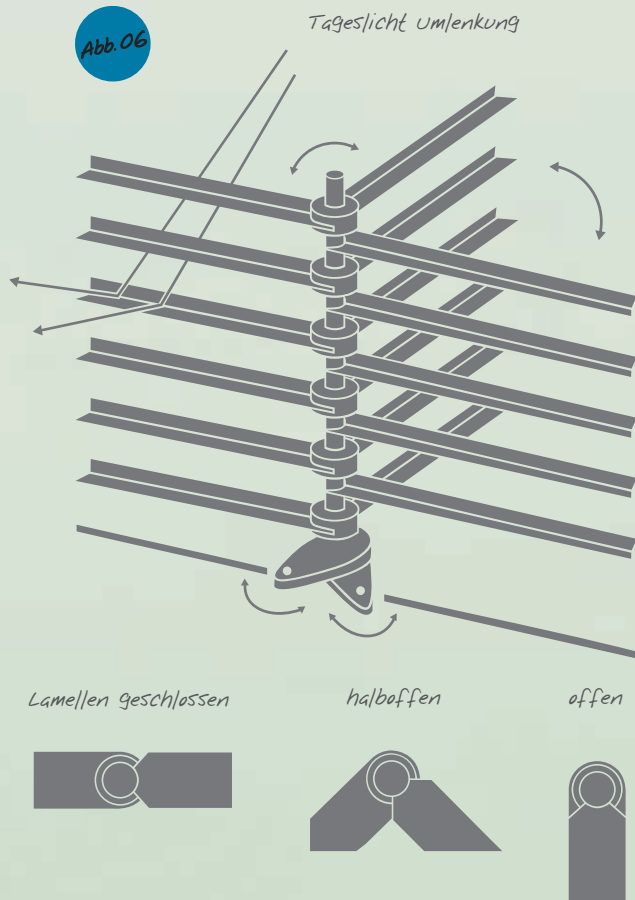

Zwei Millimeter dünne Edelstahl lamellen auf einer rotierenden Welle richten sich stufenlos am Sonnenstand aus.

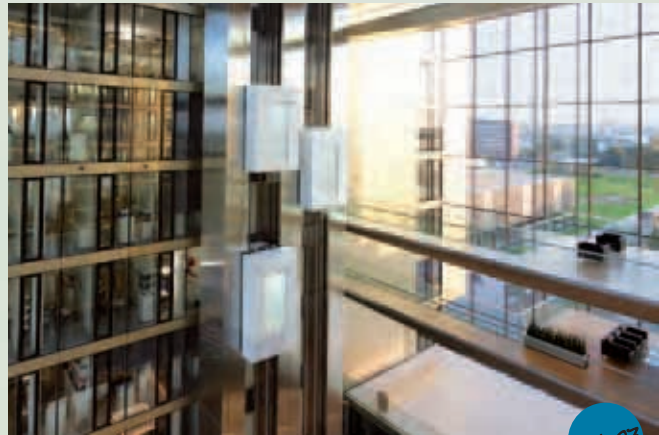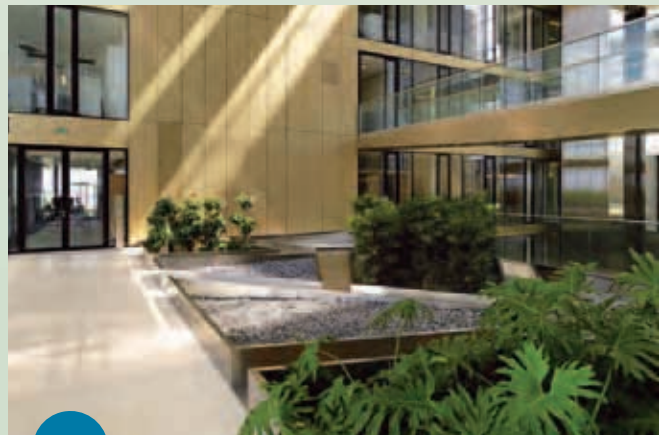

Technik trifft Natur – das gilt nicht nur für die innovativen TWIN-Aufzüge und den Blick aus dem Panoramagarten in die Freiflächen.

Viele Details des Quartiers entspringen der Technologiekompetenz von ThyssenKrupp. So sparen innovative TWIN-Aufzüge [ABB. 07](#) wertvolle Fläche ein und bringen Menschen schneller an ihr Ziel. Angenehme Raumtemperaturen sichert ein Sonnenschutzsystem [ABB. 06](#), das aus ca. 400.000 vom Unternehmen entwickelten Lamellen besteht. Diese werden automatisch nach dem Stand der Sonne ausgerichtet, halten direkte Sonneneinstrahlung ab und lenken einfallendes Licht gleichzeitig so nach innen, dass es in den Büros schön hell ist. —>



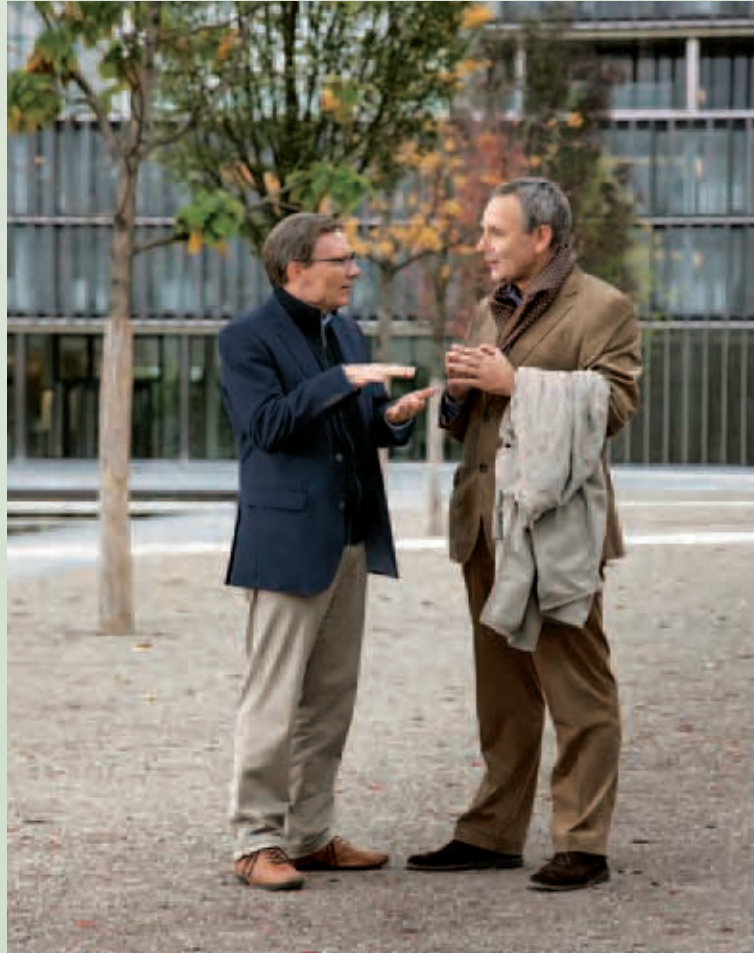**Abb. 09**

Dr. Martin Grimm, Geschäftsführer ThyssenKrupp Real Estate,  
und Dr. Andreas Kipar, Kipar Landschaftsarchitekten, im Gespräch  
über das Konzept der Allee der Welten.

## RAUM FÜR INSPIRATION

Der erweiterte Raum des Quartiers lädt zu Begegnungen, zu Ausblicken und Einsichten ein. Wasserachse, Flanier-Boulevard und die offene Campus-Struktur schaffen ein inspirierendes Arbeitsumfeld und beziehen gleichzeitig die Öffentlichkeit ein. Die Gestaltung setzt Zeichen: Kein Zaun, keine Mauer behindert den Dialog, das Quartier wird ein Ort der Gespräche und der Erfahrungen sein. Neu geschaffene großzügige Grün- und Erholungsflächen auf dem Gelände und die Allee der Welten mit Bäumen aus fünf Kontinenten tragen dazu bei [ABB. 09](#). Auch darüber hinaus wird das Quartier positiv in die Region ausstrahlen. Durch belebenden Einfluss auf die lokale und regionale Wirtschaftswelt, durch Förderung von Schulen und Universitäten und durch aktives Wahrnehmen der Rolle als verantwortlicher Corporate Citizen.



*Das Quartier ist nicht nur innen  
offen, sondern auch nach außen,  
in die Region hinein.*

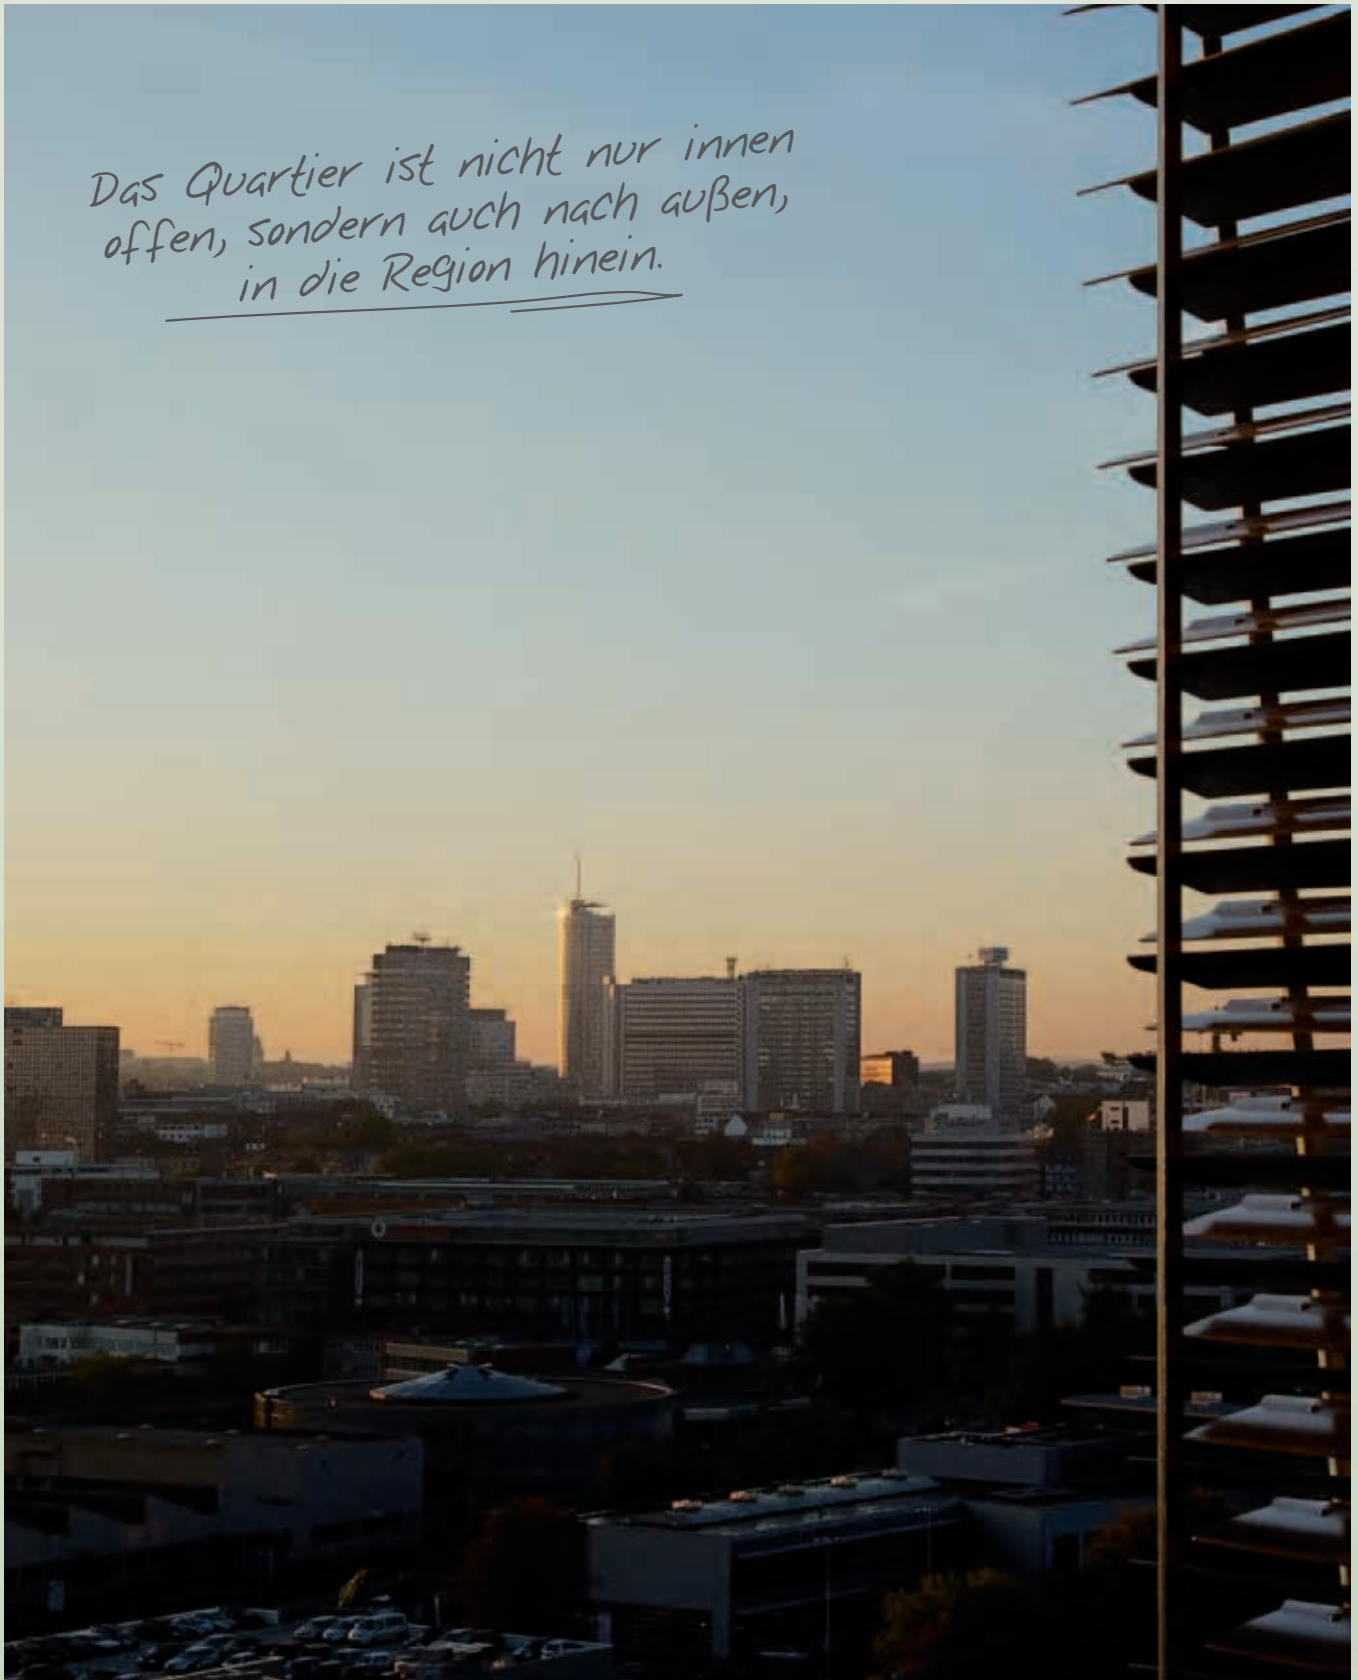

Abb.10

Essen, gesehen von der Dachterrasse  
des Gebäudes Q1 im ThyssenKrupp Quartier.

→ MEHR ZUM THEMA NACHHALTIGKEIT UND  
VERANTWORTUNG IM THYSSENKRUPP  
QUARTIER FINDEN SIE AUF SEITE 83 IM  
GESCHÄFTSBERICHT.



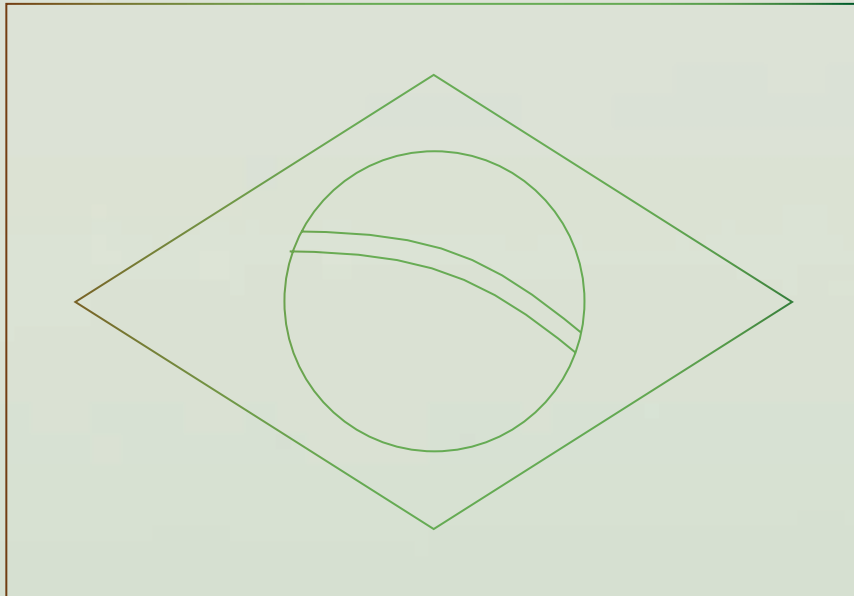

THYSSENKRUPP CSA SIDERÚRGICA DO ATLÂNTICO

 $22^{\circ} 55' S$   $43^{\circ} 41' W$ 

# Santa Cruz Brasilien

Eines der modernsten Stahlwerke der Welt  
entstand an einem idealen Ort:  
nahe an den Eisenerzvorkommen Brasiliens.

EINE INVESTITION  
IN WACHSTUM

S. 17

DAS WERK  
IM ÜBERBLICK

S. 18

PERFEKTE ANBINDUNG  
ALS STANDORTVORTEIL

S. 20

EIN PLUS FÜR  
DIE UMWELT

S. 21

MEHRWERT  
FÜR DIE REGION

S. 22



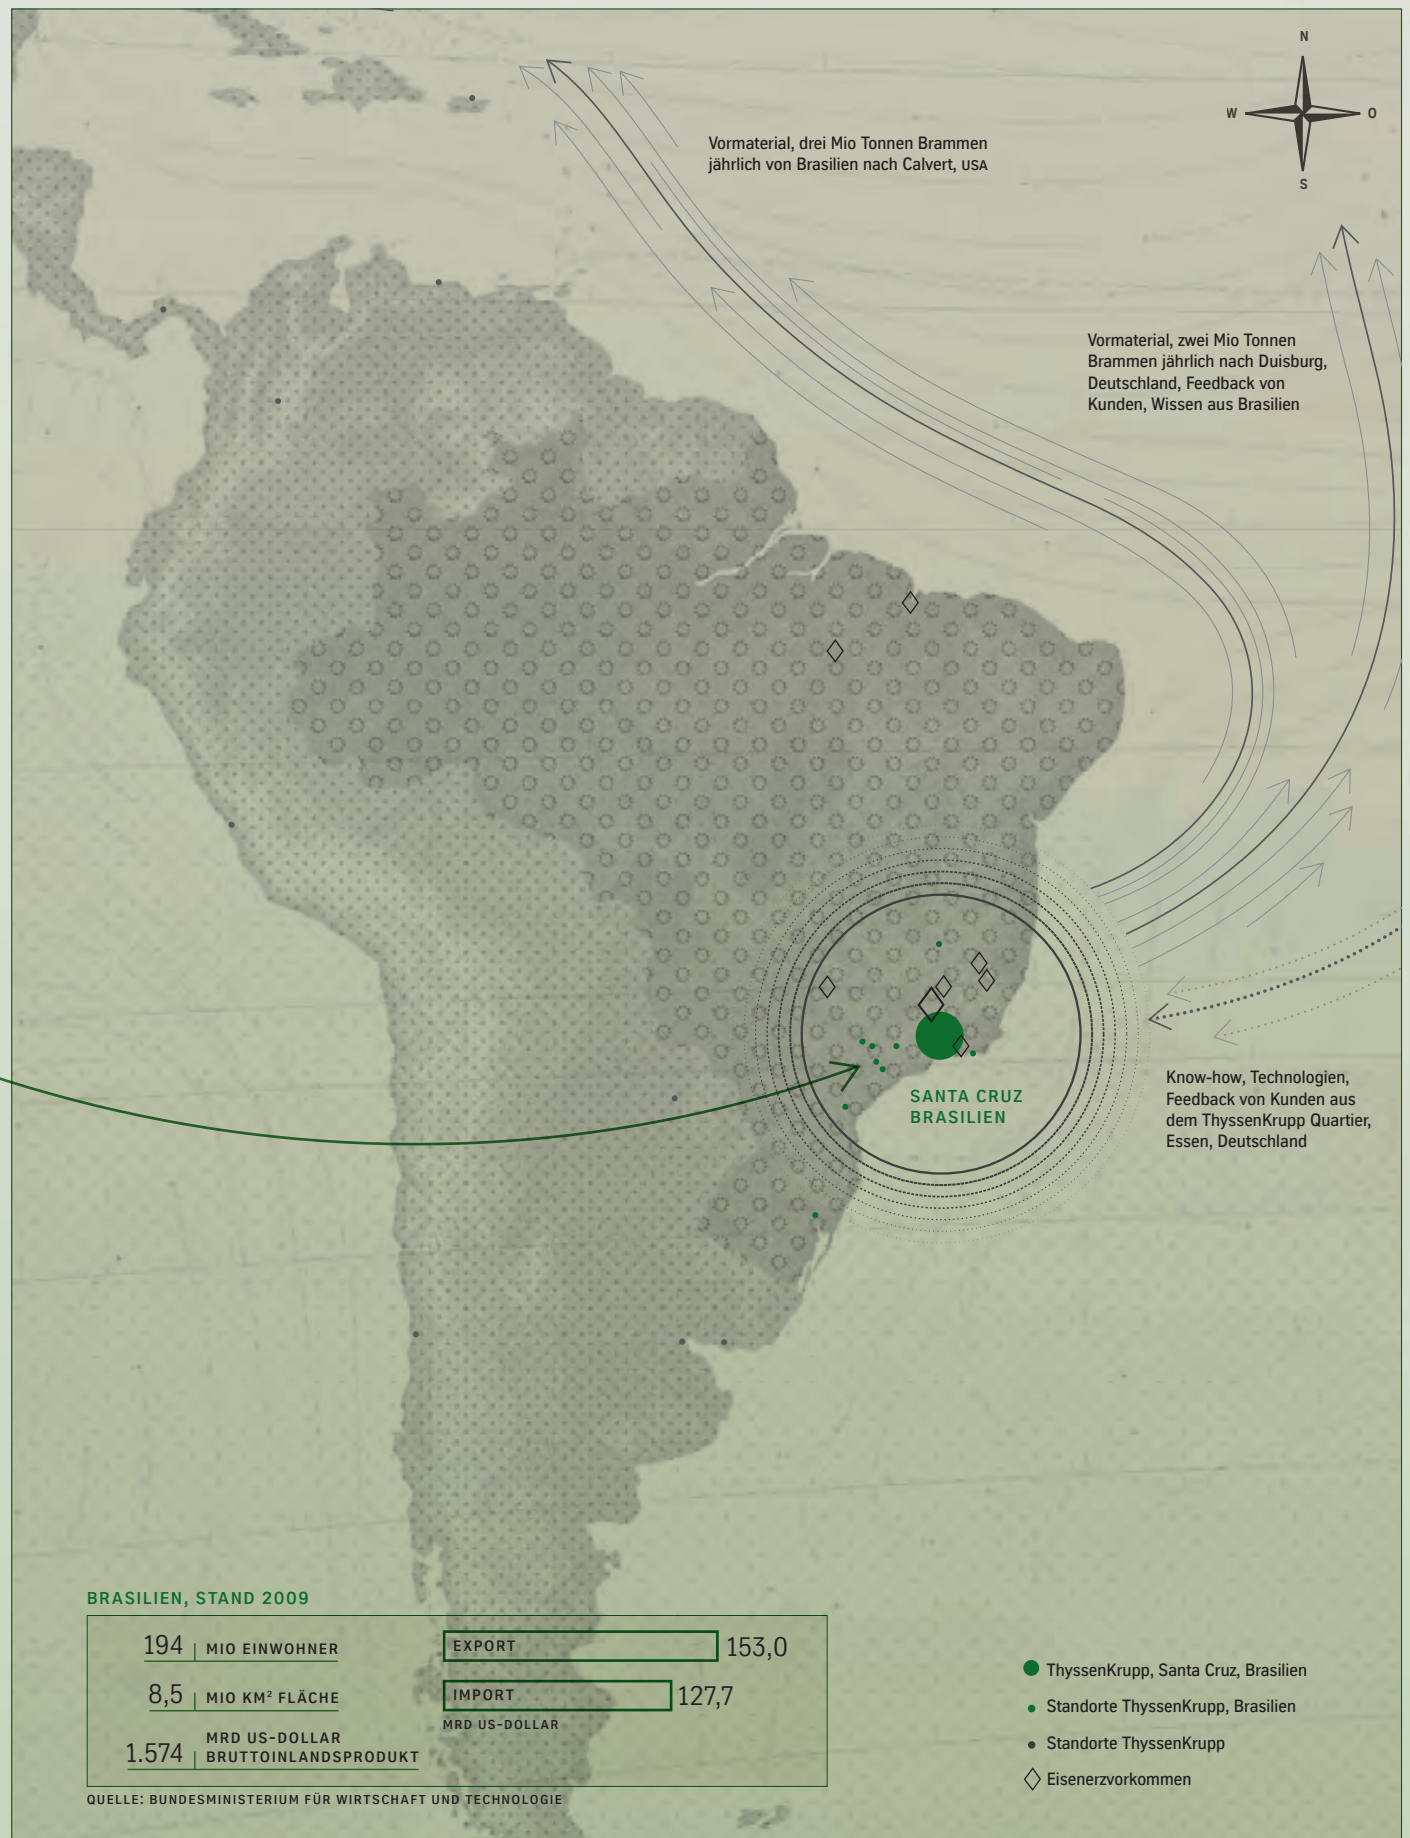



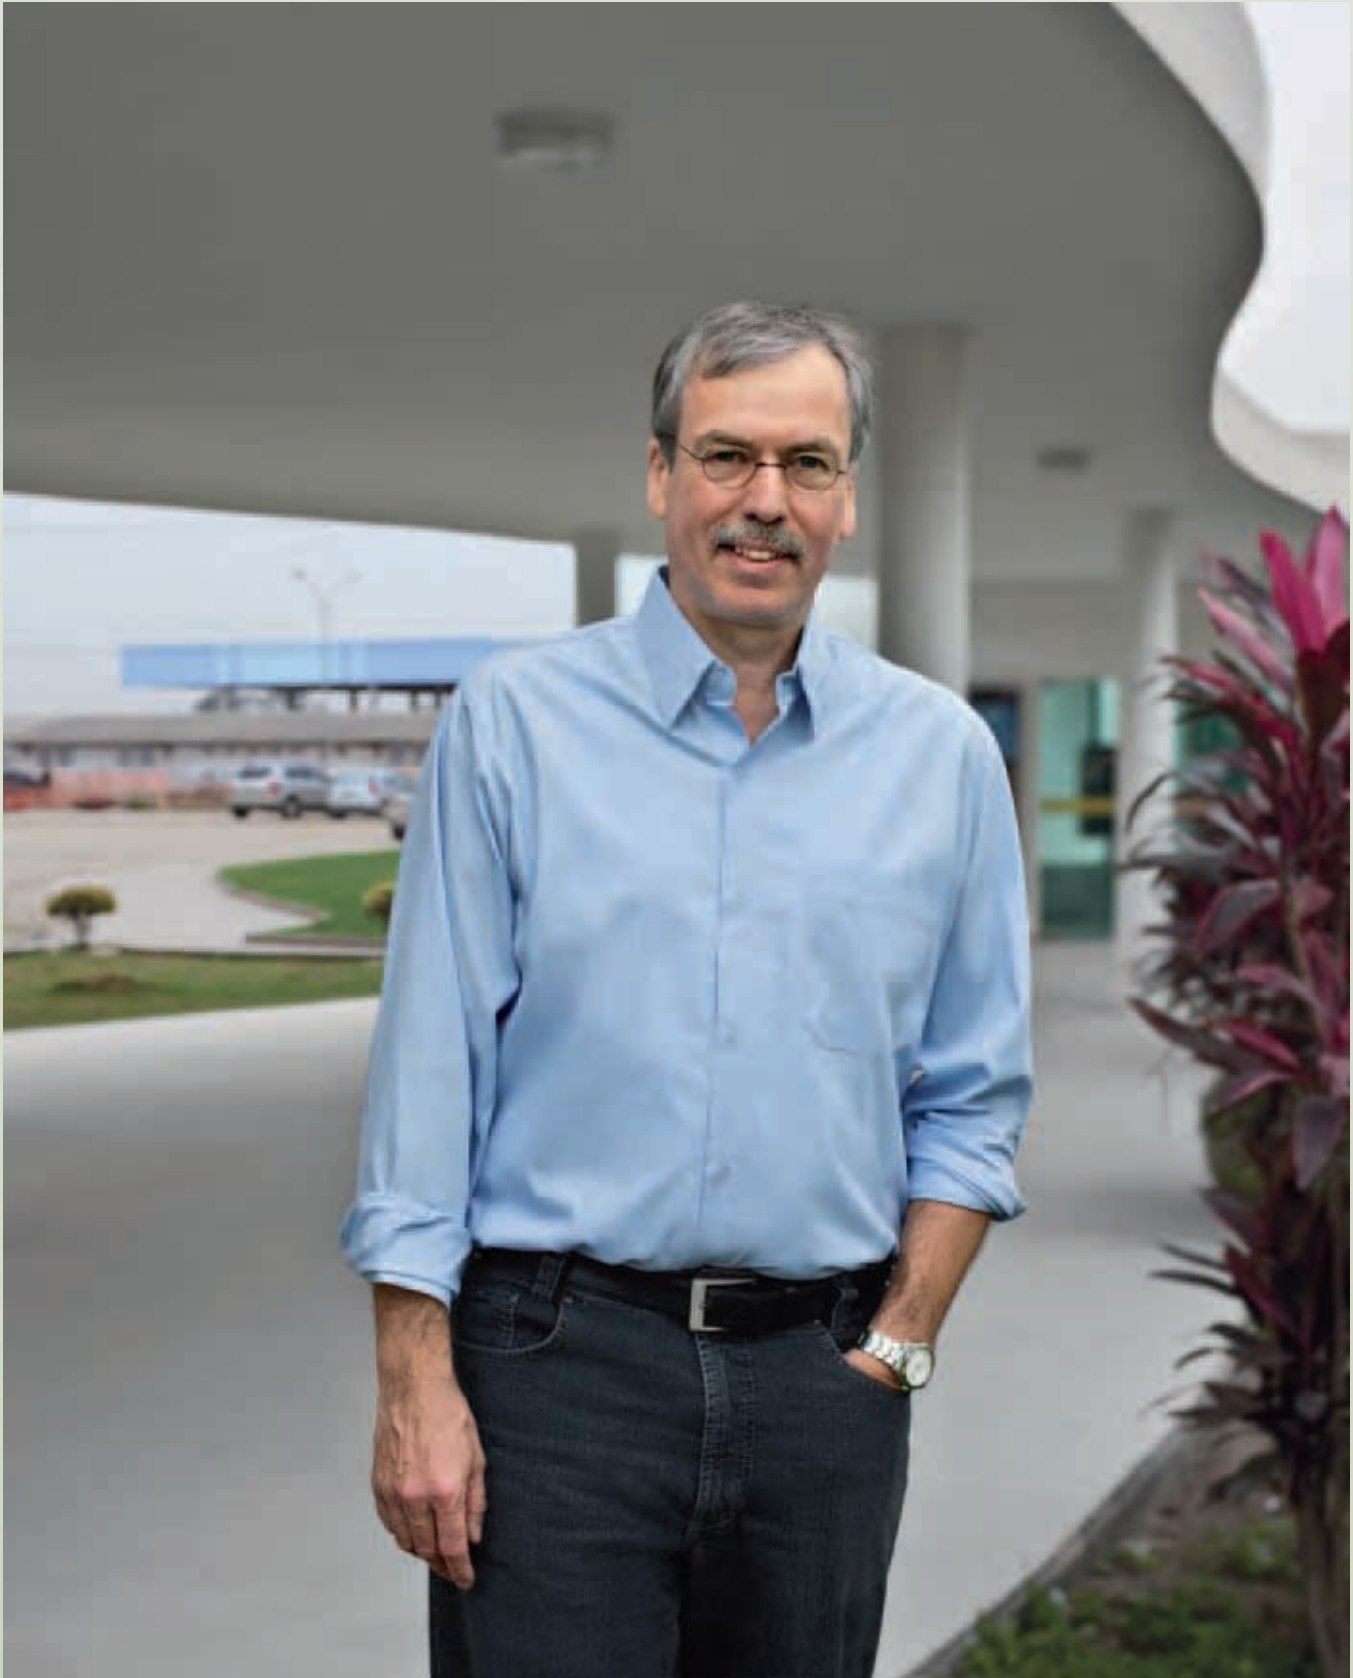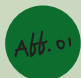

Dr. Herbert Eichelkraut, CEO ThyssenKrupp CSA, bereitete zusammen mit seinem Team den Start der Produktion minutiös vor.



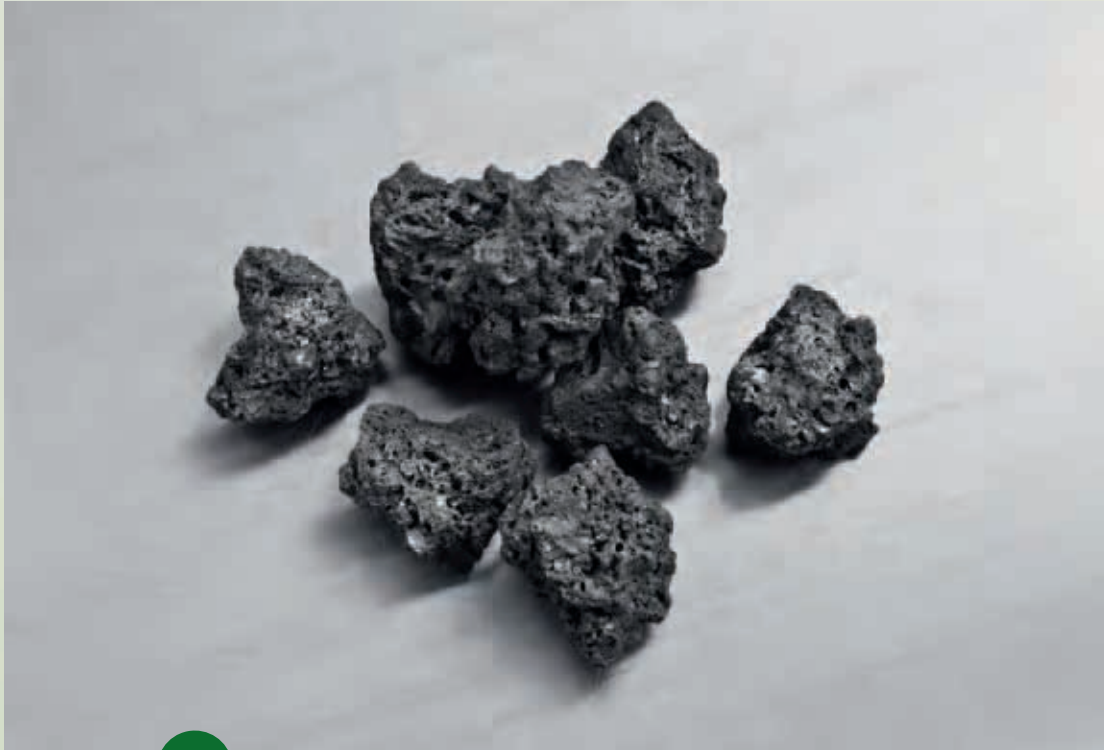

Abb. 02

Das Roheisen entsteht im Reduktionsprozess von  
gesintertem Eisenerz und Koks.

Wirtschaftlicher ist es,  
stahl dort zu produzieren,  
wo die Rohstoffe sind.

#### EINE INVESTITION IN WACHSTUM

In der Nähe großer Eisenerzvorkommen [ABB. 02](#) entstand mit ThyssenKrupp csa Siderúrgica do Atlântico in Santa Cruz, Brasilien, eines der modernsten und umweltschonendsten Stahlwerke weltweit. Seine Kapazität liegt bei fünf Mio Tonnen Brammen pro Jahr, die zu wettbewerbsfähigen Kosten und mit höchsten Qualitätsstandards produziert werden. Das Werk ist – im Verbund mit der neuen Weiterverarbeitungsanlage in Calvert, USA, und den Produktionsstätten in Deutschland – von zentraler Bedeutung für die Wachstumsstrategie von ThyssenKrupp in den Kernmärkten Europa und Nordamerika (NAFTA). Mit den kostengünstigen Brammen wird ThyssenKrupp seine weltweite Top-Position im Markt für hochwertigen Qualitätsflachstahl weiter ausbauen. —>



9 km<sup>2</sup> | WERKSFLÄCHE

3.500 | NEUE ARBEITSPLÄTZE

5.000.000 t | BRAMMEN

490 MW | JÄHRLICHE STROMERZEUGUNG

200.000 | BÄUME ZUM ERHALT BIOLOGISCHER VIELFALT

EINES DER UMWELTSCHONENDSTEN  
STAHLWERKE WELTWEIT

KOKEREI

SINTERANLAGE

ROHSTOFFLAGER

HOCHOFEN 01 UND 02

KRAFTWERK

GASOMETER

STAHLWERK UND  
STRANGGIESSANLAGE

WASSERAUFBEREITUNG

BRAMMENLAGER

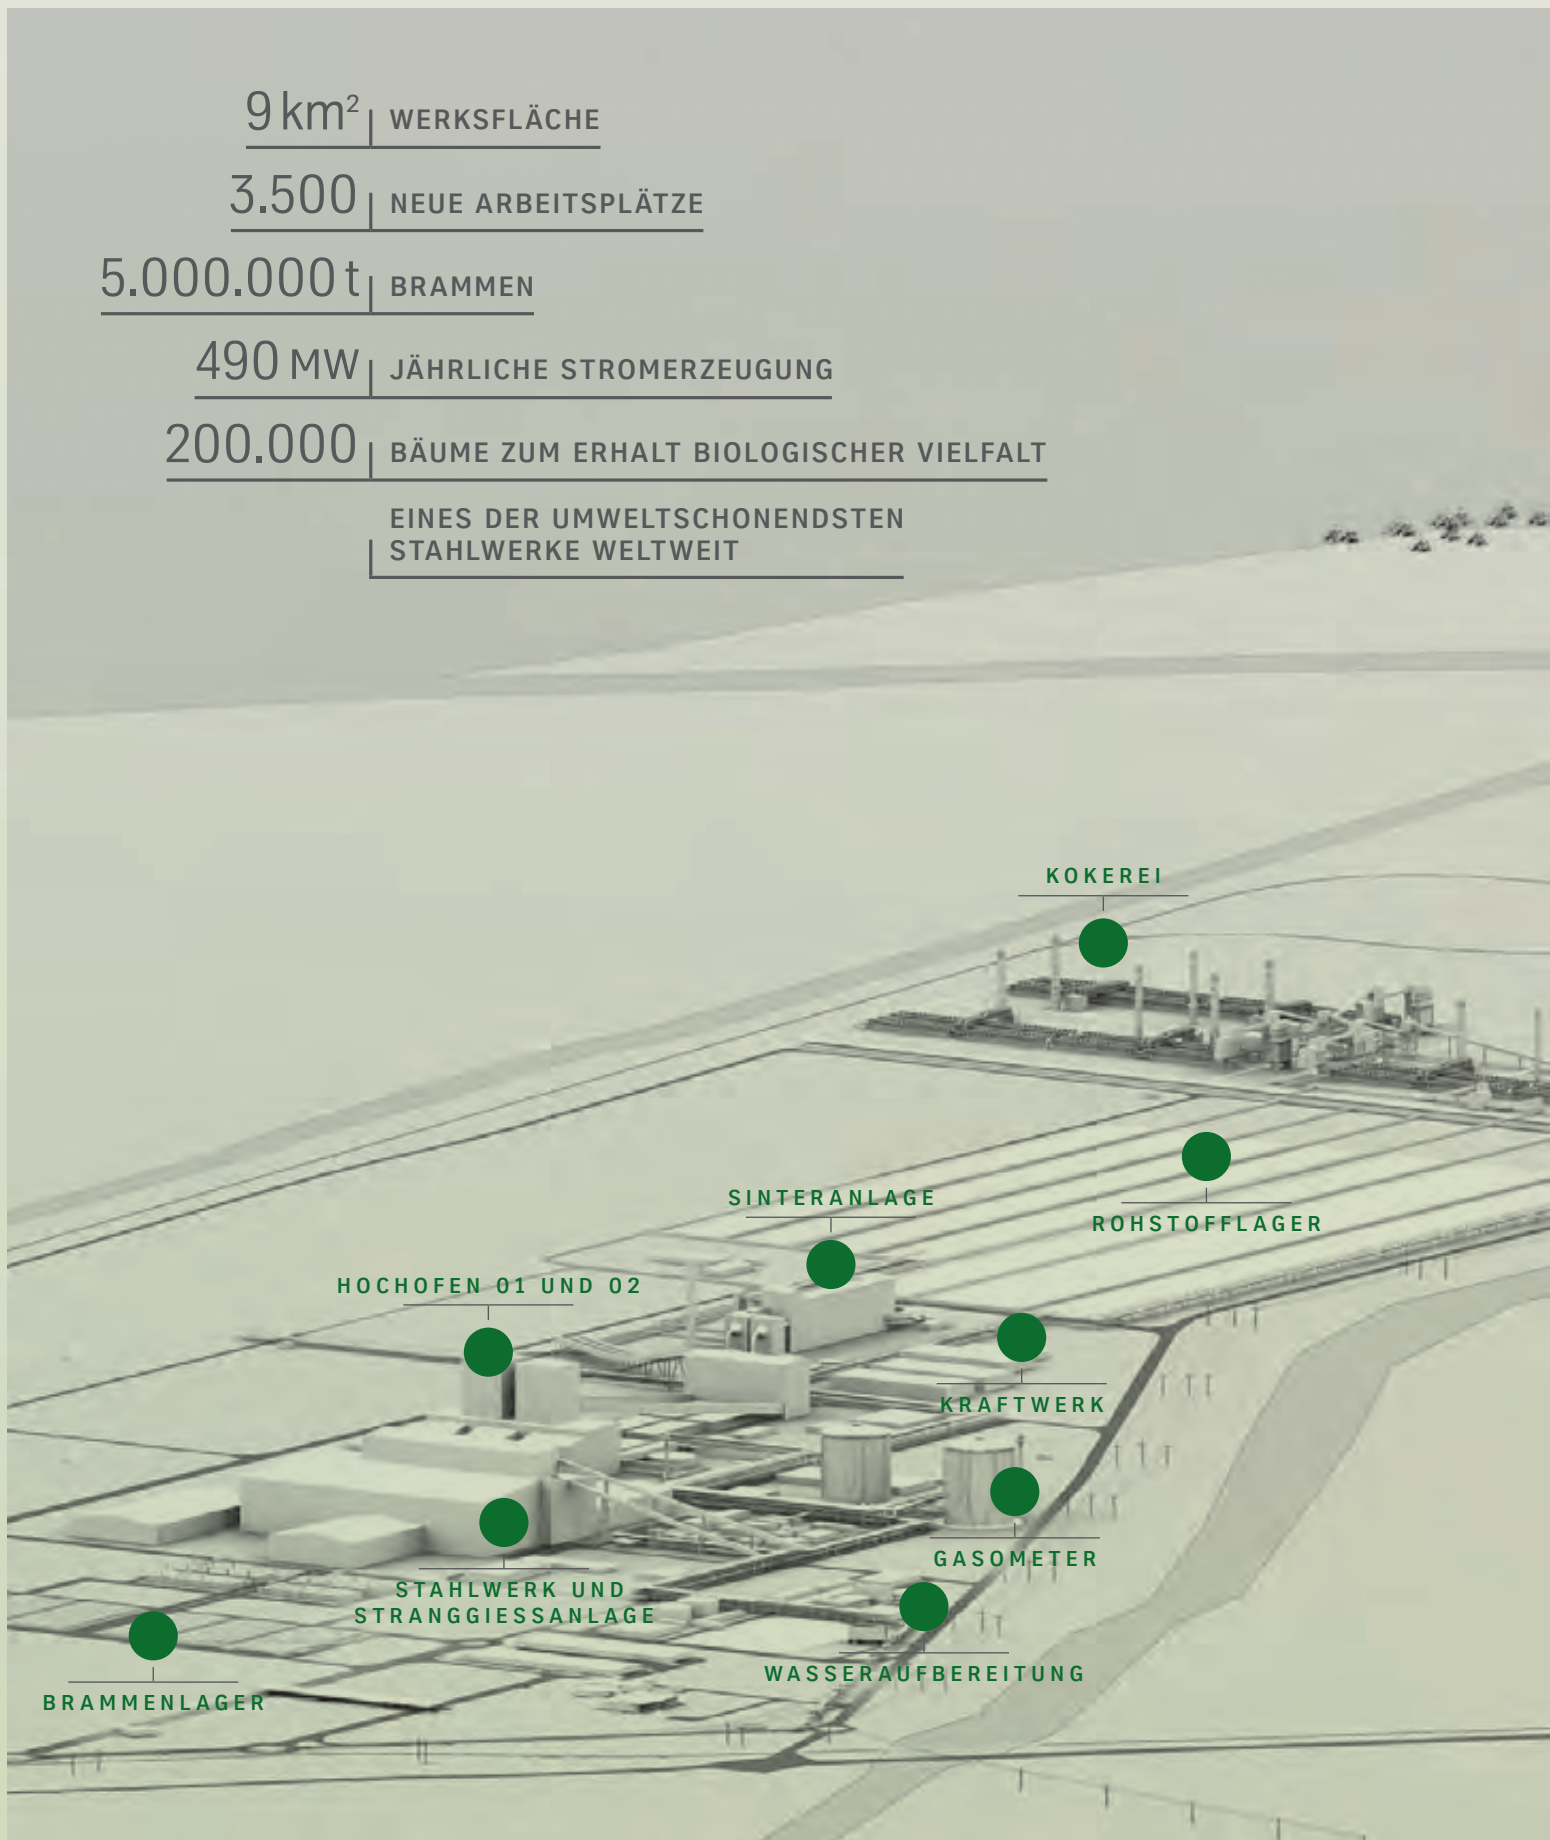



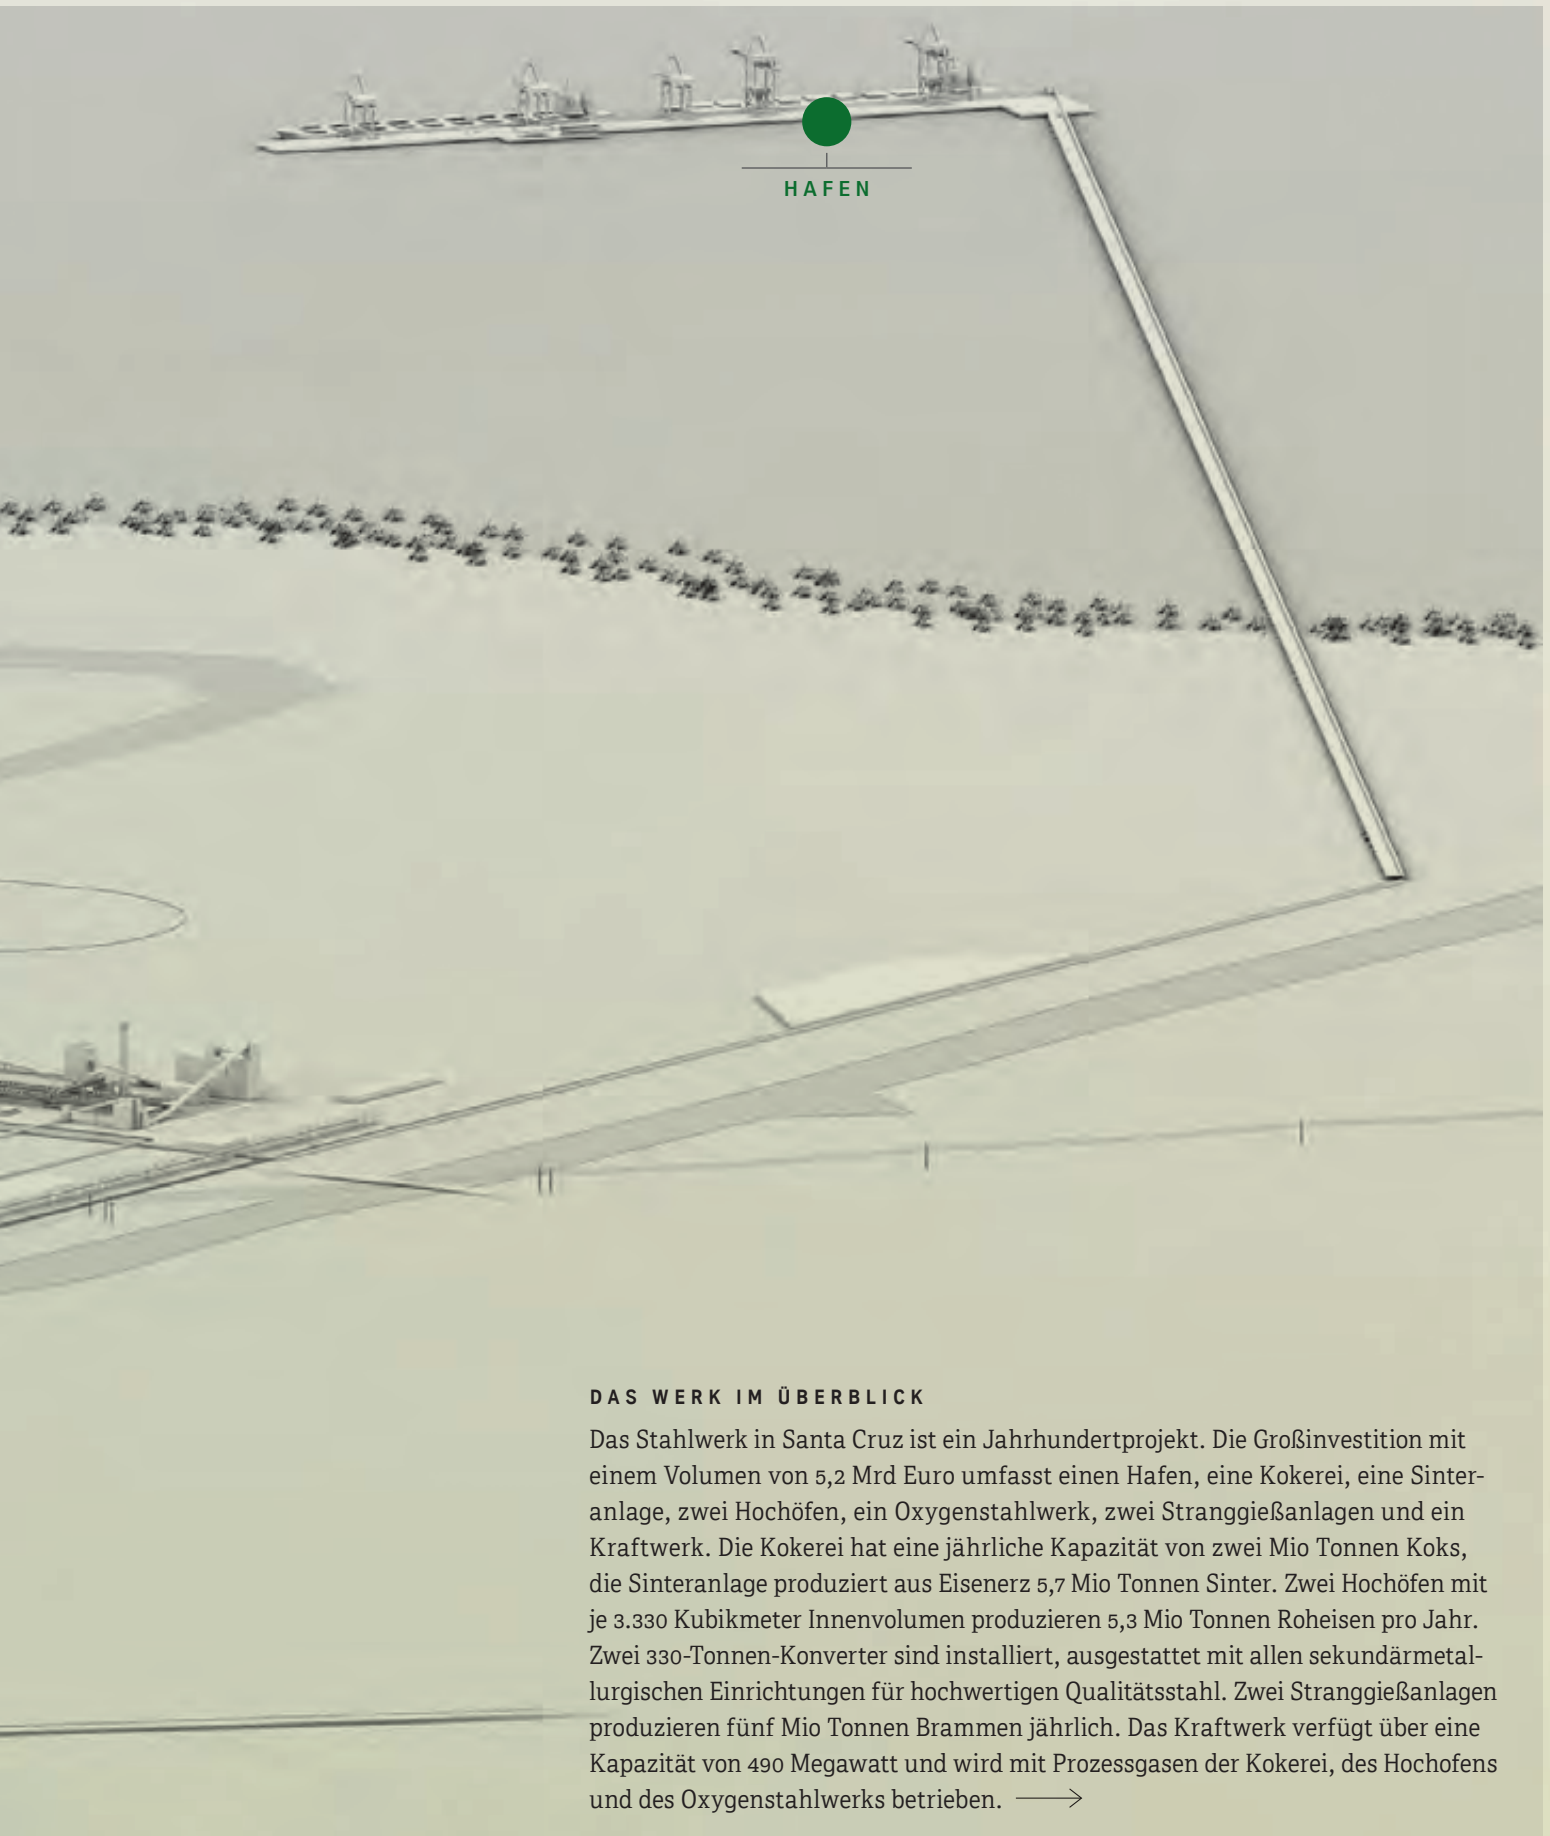

#### DAS WERK IM ÜBERBLICK

Das Stahlwerk in Santa Cruz ist ein Jahrhundertprojekt. Die Großinvestition mit einem Volumen von 5,2 Mrd Euro umfasst einen Hafen, eine Kokerei, eine Sinteranlage, zwei Hochöfen, ein Oxygenstahlwerk, zwei Stranggießanlagen und ein Kraftwerk. Die Kokerei hat eine jährliche Kapazität von zwei Mio Tonnen Koks, die Sinteranlage produziert aus Eisenerz 5,7 Mio Tonnen Sinter. Zwei Hochöfen mit je 3.330 Kubikmeter Innenvolumen produzieren 5,3 Mio Tonnen Roheisen pro Jahr. Zwei 330-Tonnen-Konverter sind installiert, ausgestattet mit allen sekundärmetallurgischen Einrichtungen für hochwertigen Qualitätsstahl. Zwei Stranggießanlagen produzieren fünf Mio Tonnen Brammen jährlich. Das Kraftwerk verfügt über eine Kapazität von 490 Megawatt und wird mit Prozessgasen der Kokerei, des Hochofens und des Oxygenstahlwerks betrieben. —>



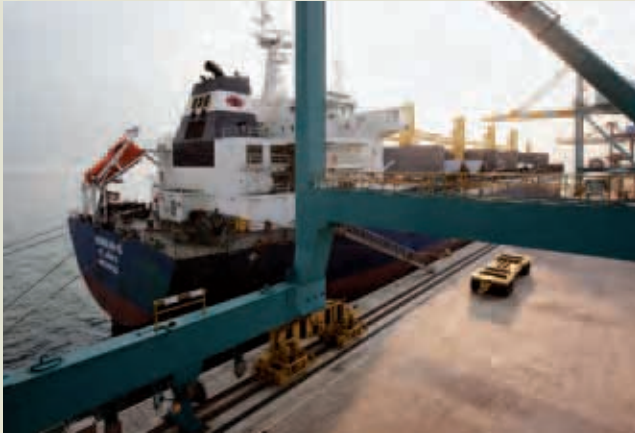

Abb. 03

Der Versand der Brammen in die USA und nach Deutschland erfolgt per Schiff der Panamax-Klasse.

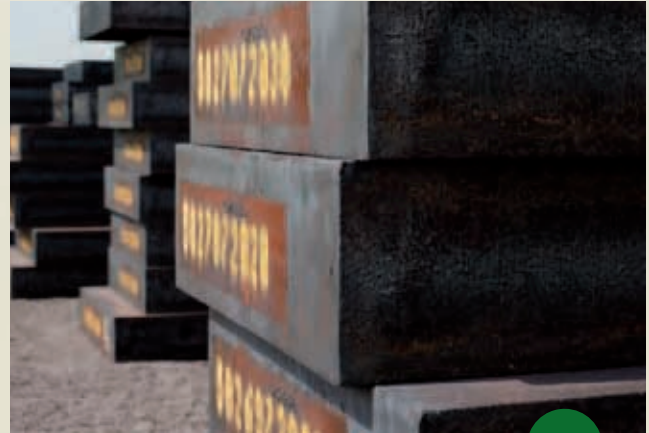

Abb. 04

Mit moderner Logistiktechnik lässt sich der Weg jeder einzelnen Bramme lückenlos verfolgen.

Ein eigener Tiefseehafen bietet  
eine leistungsfähige Verkehrsanbindung.

#### PERFEKTE ANBINDUNG ALS STANDORTVORTEIL

Mit entscheidend für die Auswahl des neun Quadratkilometer großen Werksgeländes an der Bucht von Sepetiba bei Santa Cruz waren Kostenvorteile. Dabei spielt der direkte Zugang zum Atlantischen Ozean für den Import von Koks-kohle und den Export der Brammen eine wichtige Rolle. Noch bedeutender ist die Nähe zum Eisenerz. Auf dem Werksgelände endet eine Bahnlinie aus den Erzminen des ThyssenKrupp csa Partners Vale in der Region Minas Gerais. Der eigene Tiefseehafen [ABB. 03](#) bildet die Verbindung zwischen der Produktion von Stahlbrammen in Brasilien und der Veredelung zu Qualitätsflachstahl in den USA sowie in Deutschland. Jährlich drei Mio Tonnen Brammen werden an das neue Weiterverarbeitungswerk in Calvert in Alabama, USA geliefert, zwei Mio Tonnen an die Werke in Deutschland, die Kunden in Europa mit Fertigprodukten versorgen. —>



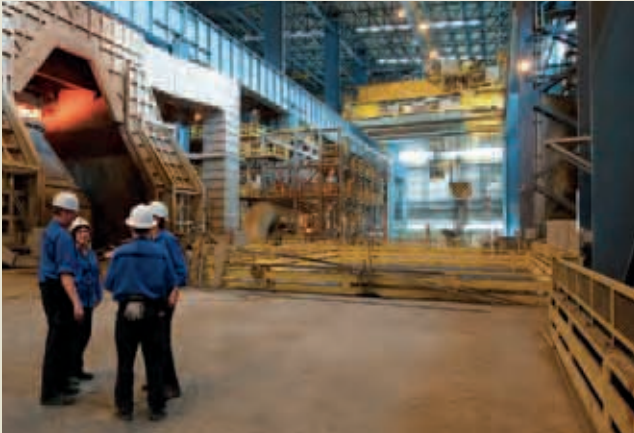

Abb. 05

Die Produktion entspricht hohen europäischen Umweltstandards.

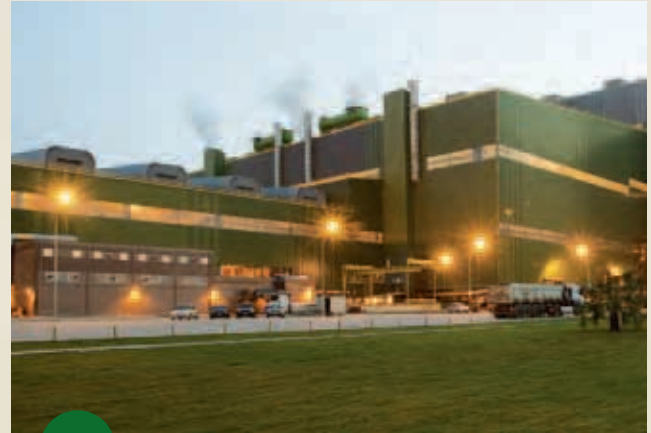

Abb. 06

Die Farbgestaltung der Gebäude reflektiert die Farben der Nachbarschaft.

*Das neue Stahlwerk fügt sich in die natürliche Umgebung ein.*

#### EIN PLUS FÜR DIE UMWELT

Die Auslegung des neuen Werkes orientiert sich an modernsten Technologien und höchsten Umweltstandards. ThyssenKrupp csa hält nicht nur die in Brasilien geltenden Umweltschutzrichtlinien ein, sondern die weitaus schärferen europäischen Vorgaben. Ein rund 1,6 Quadratkilometer großer Mangrovenwald an der Küste wurde erhalten. Zudem trägt ein 200.000-Bäume-Programm von ThyssenKrupp zum Erhalt der biologischen Vielfalt in der Region bei. Das umweltfreundliche Gaskraftwerk sichert die eigene Stromversorgung, speist aber auch rund 200 Megawatt in das Netz des Bundesstaates Rio de Janeiro ein. —>



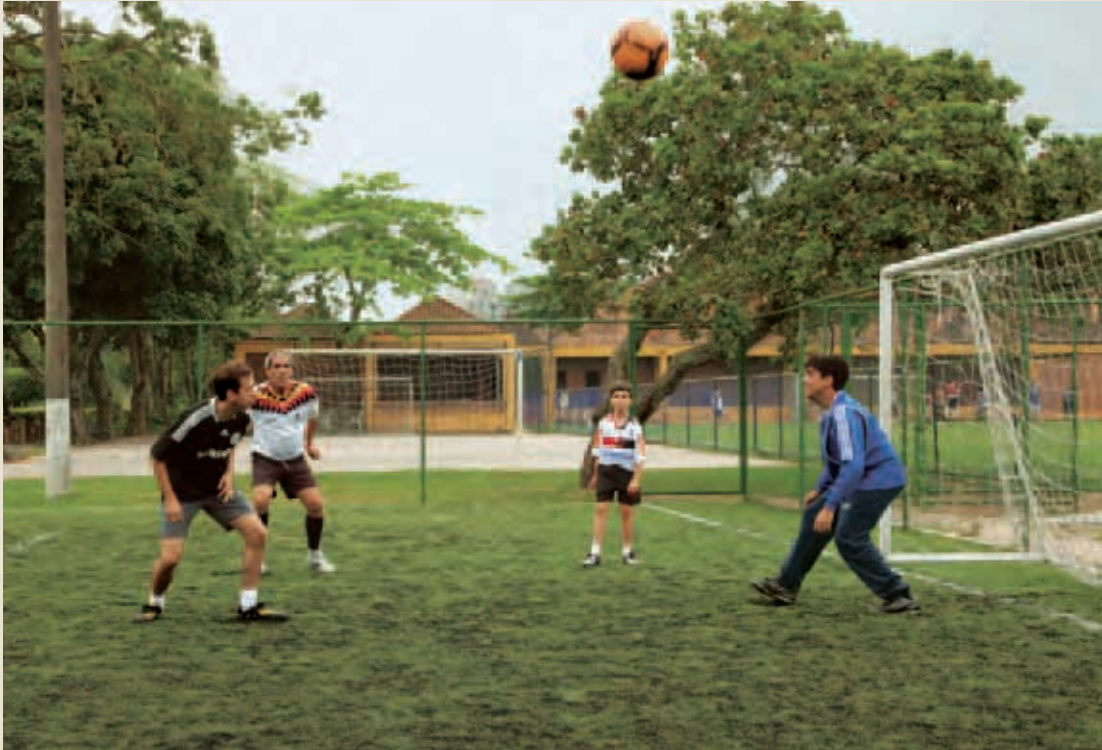

Abb. 07

Mitarbeiter und ihre Kinder beim  
brasilianischen und auch deutschen Nationalsport.

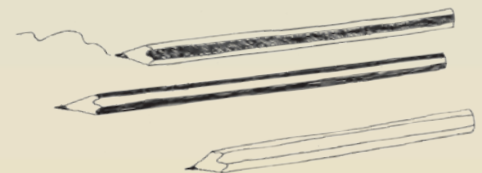

#### MEHRWERT FÜR DIE REGION

Das ThyssenKrupp Stahlwerk in Santa Cruz war die größte Privatinvestition der letzten zehn Jahre in Brasilien. Das Werk bringt Wohlstand und nachhaltiges wirtschaftliches Wachstum in die Region. Auch die Bevölkerung in der Nachbarschaft zieht daraus großen Nutzen. Denn ThyssenKrupp fördert das Gemeinwesen in vielfältiger Form, beispielsweise durch Unterstützung von Feuerwehr, medizinischer Versorgung, Bildungseinrichtungen und Universitäten. Den künftig 3.500 Beschäftigten werden umfassende Möglichkeiten zur Weiterbildung und beruflichen Entwicklung geboten. So schafft die Einrichtung einer technischen Akademie in der Gemeinde Itaguaí mit Ausbildungsprogrammen neue Perspektiven für junge Menschen. Daneben kooperiert das Unternehmen mit Universitäten und fördert den Austausch von Know-how zwischen Studenten und Praktikern. Für Kinder und Jugendliche hat ThyssenKrupp im Sommer 2010 das Fußballprojekt Copa Social CSA ins Leben gerufen. Über den Sport soll das dreimonatige Projekt Selbstbewusstsein, Teamgeist und Verantwortung für die Gemeinschaft stärken.



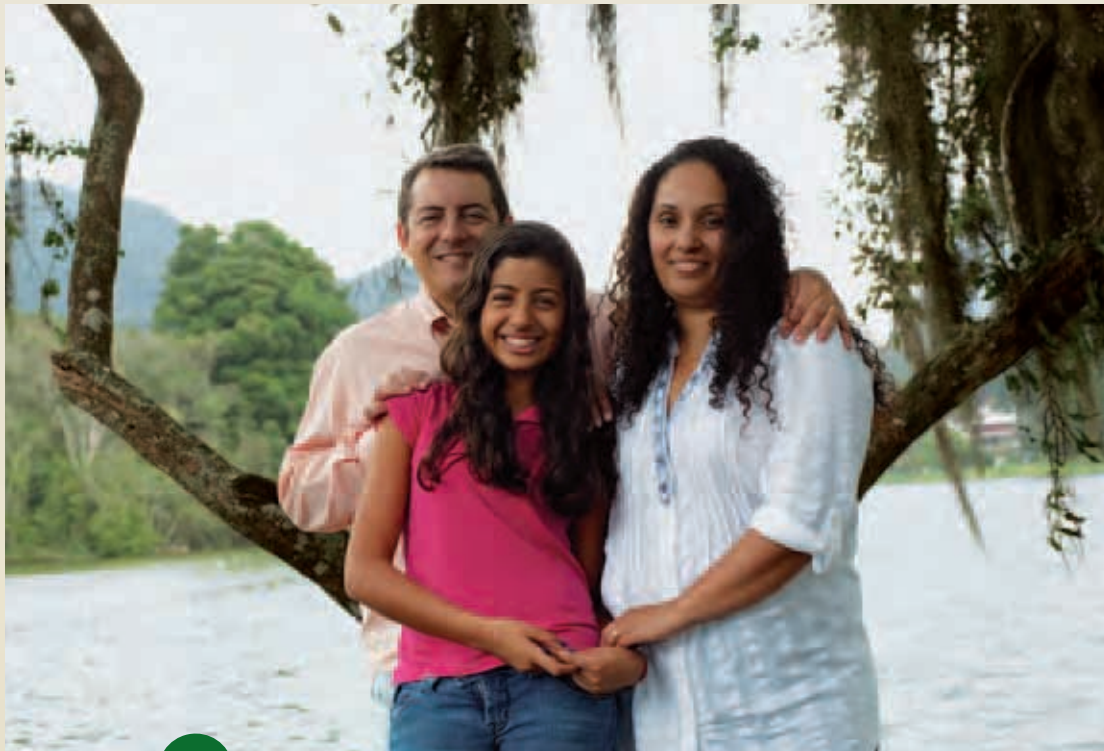

Abb. 08

Dr.-Ing. Thais de Lima Alves Pinheiro Fernandes, Laborantin  
in der Qualitätskontrolle von ThyssenKrupp csa, und ihre Familie  
genießen die Freizeit in unberührter Natur.

In den letzten zwei Jahren hat kein  
Investment in der Region  
mehr Arbeitsplätze und mehr Nutzen  
für die Gesellschaft geschaffen.



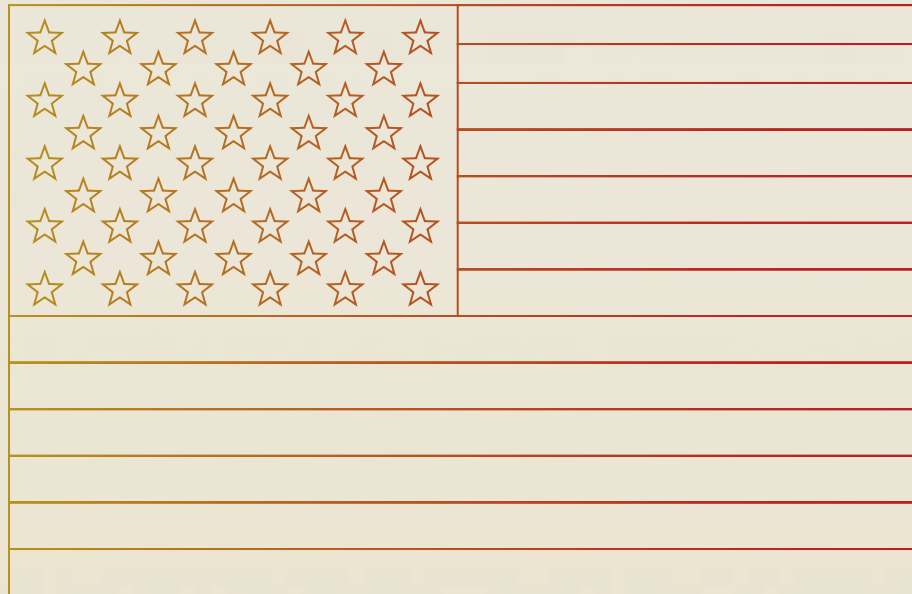

THYSSENKRUPP STEEL USA UND THYSSENKRUPP STAINLESS USA

31° 09' N 88° 00' W

# Calvert USA

In einer aufstrebenden Region des NAFTA-Raums  
errichtete ThyssenKrupp eine hochmoderne  
Verarbeitungsanlage für hochwertigen Qualitätsflachstahl  
und Edelstahl-Flachprodukte.

POSITION  
GESTÄRKT

S. 27

DAS WERK  
IM ÜBERBLICK

S. 28

NEUE MÄRKTE,  
ERWEITERTE CHANCEN

S. 30

VERANTWORTUNG  
UMSETZEN

S. 32



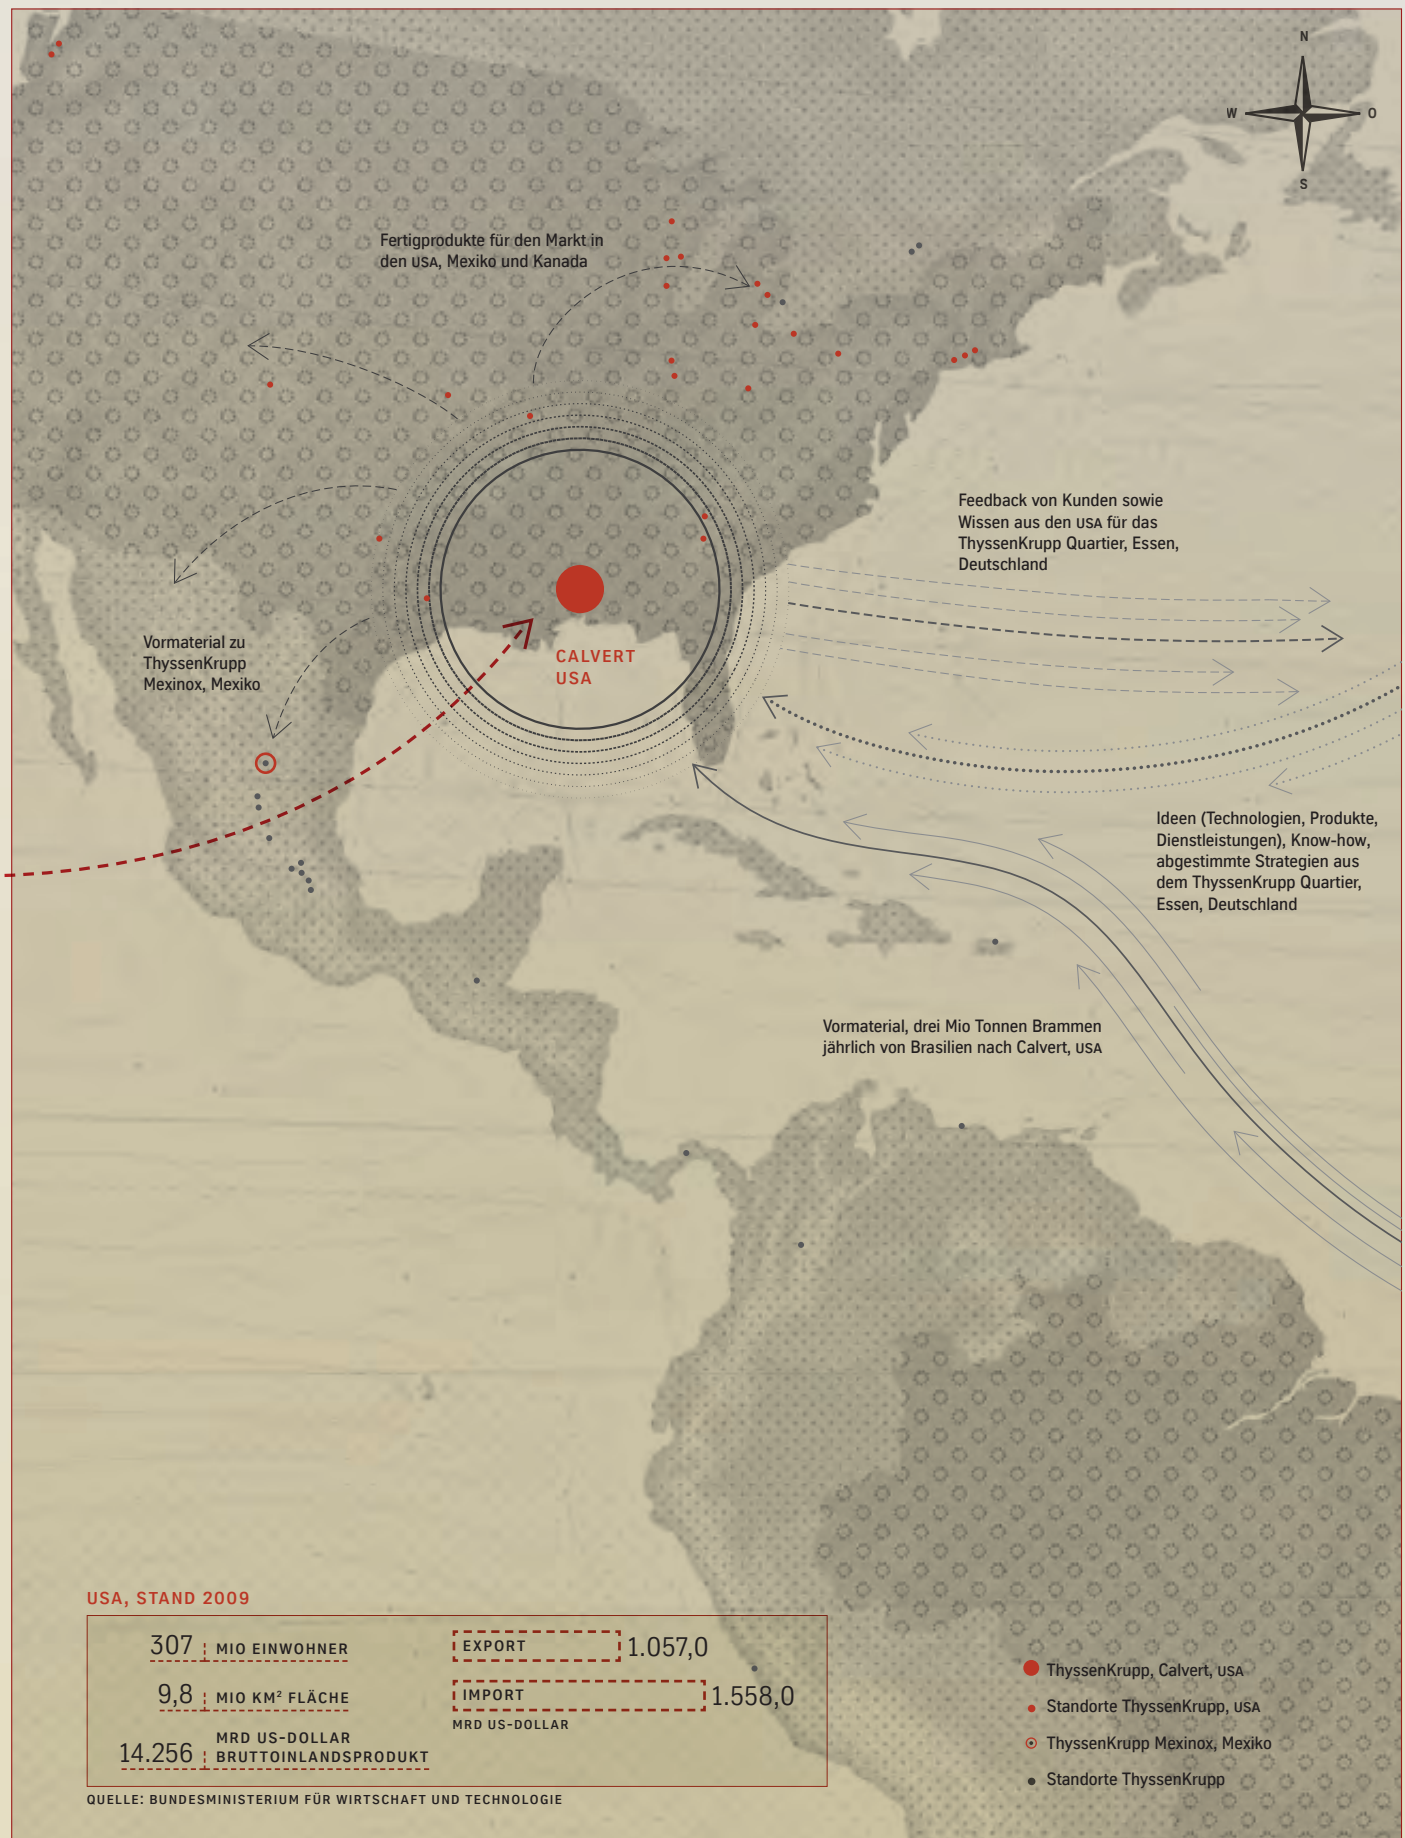



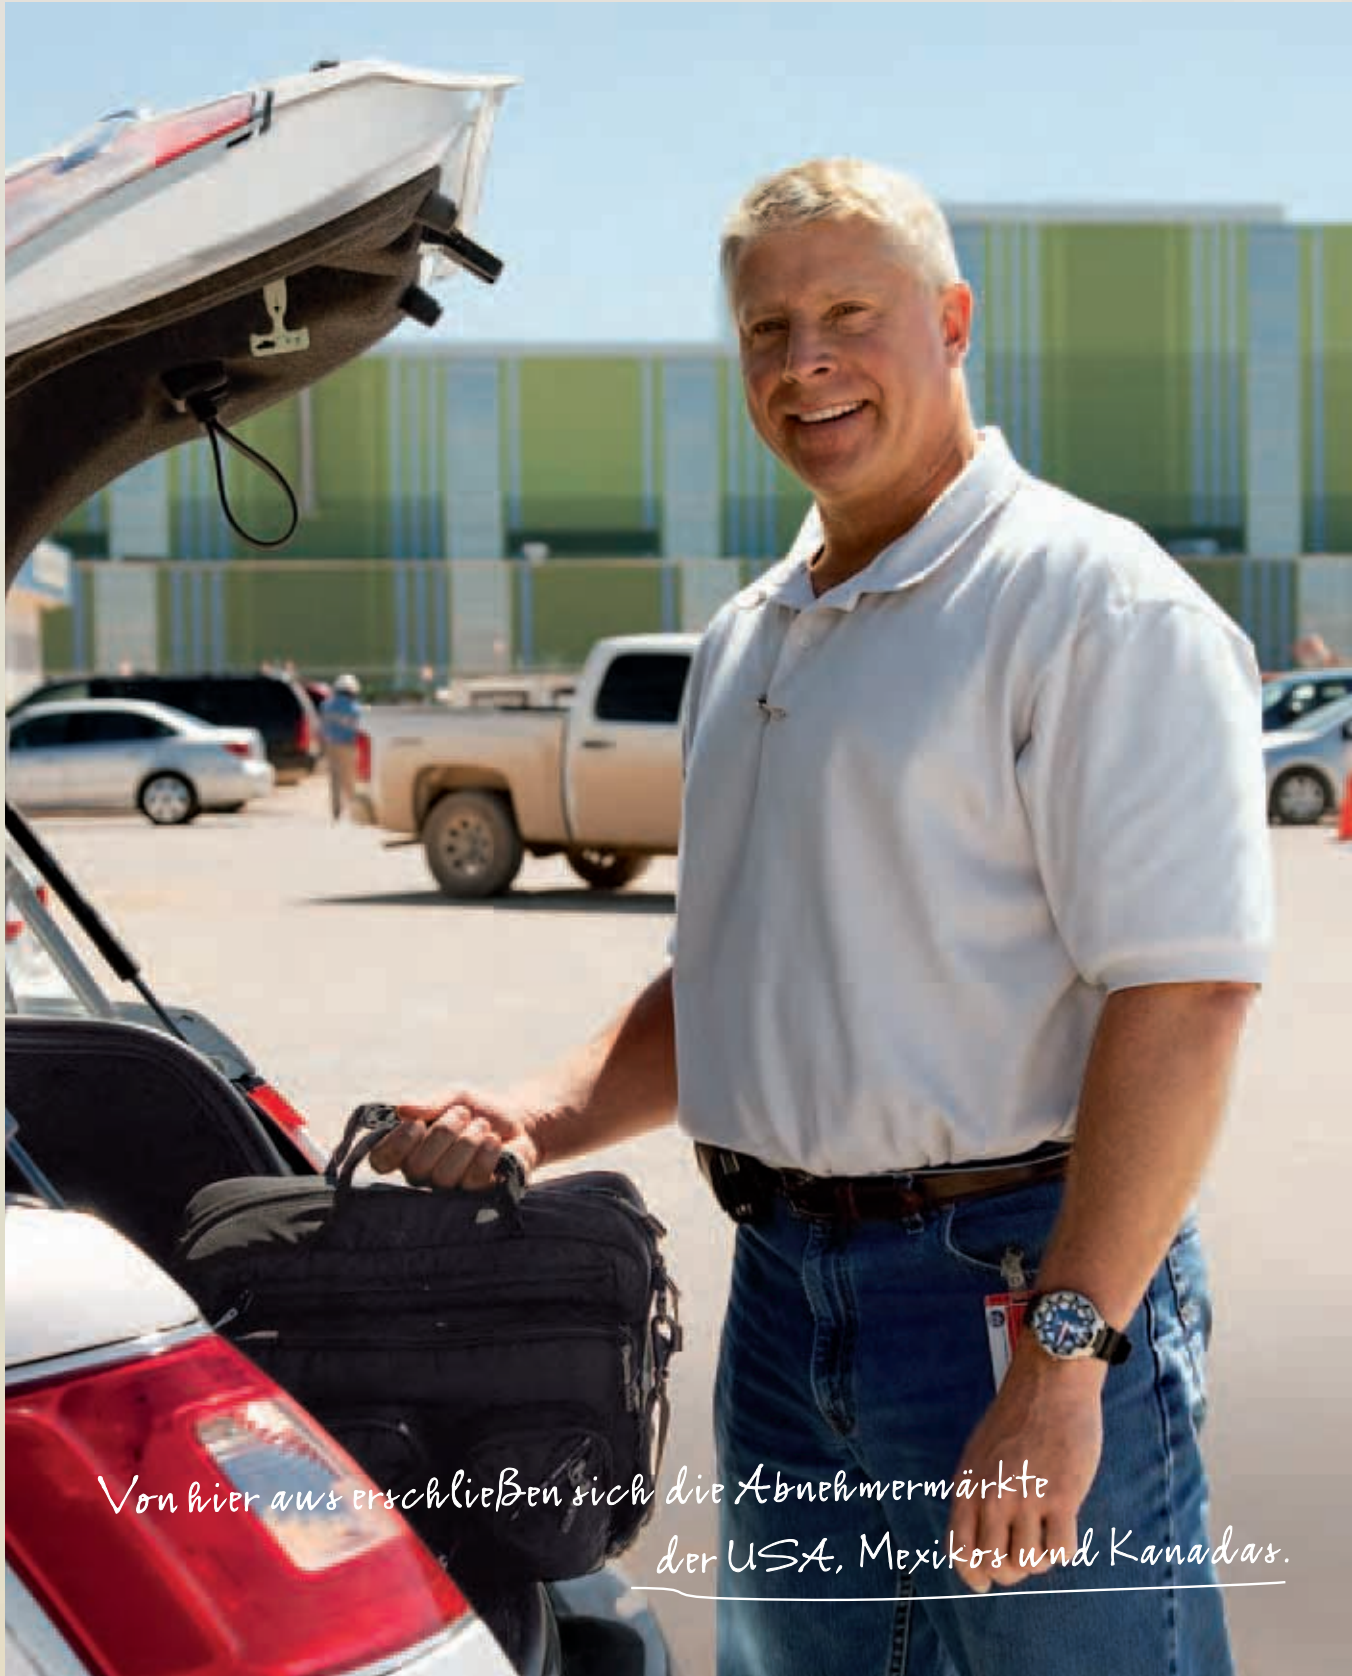

*Von hier aus erschließen sich die Abnehmermärkte  
der USA, Mexikos und Kanadas.*

Abb. 01

Adam J. Diethorn, Steel Purchasing Manager bei  
Dietrich Metal Framing, ist ein Kunde der ersten Stunde.



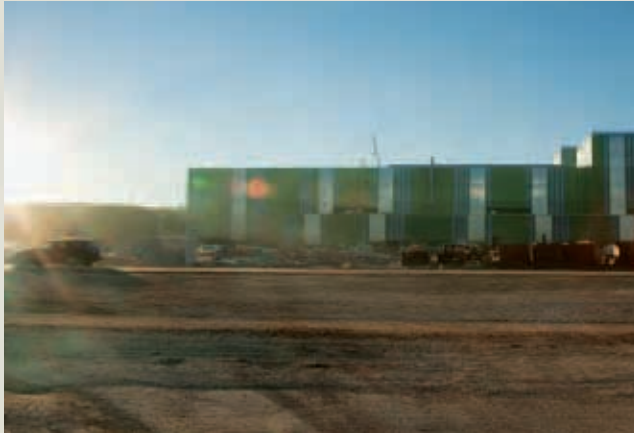

Kapazität für jährlich fünf Mio Tonnen hochwertigen Flachstahl: das neue Verarbeitungswerk in Calvert.

Abb. 02

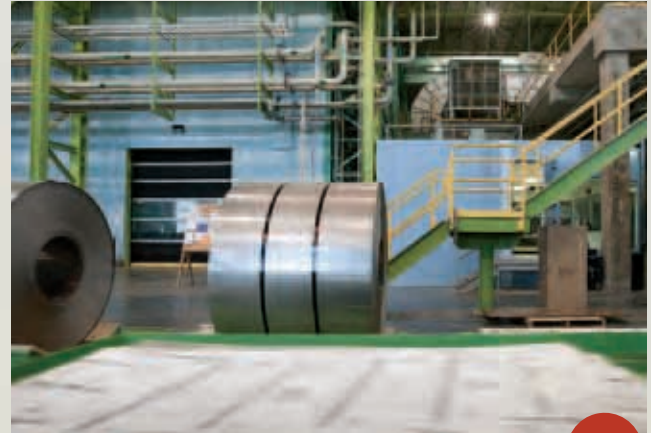

Abnehmer der Coils sind vor allem Hersteller von Fahrzeugen und Haushaltsgeräten sowie Anlagenbauer.

Abb. 03

#### POSITION GESTÄRKT

Eine der modernsten Verarbeitungsanlagen der Welt für Qualitätsflachstahl und Edelstahl-Flachprodukte steht jetzt in Calvert, Alabama [ABB. 02](#). Errichtet wurde sie von ThyssenKrupp Steel USA und ThyssenKrupp Stainless USA, die mit dem neuen Standort ihre Marktposition in der NAFTA-Region stärken. Die Anlage wird Qualität und Kostenstrukturen verbessern sowie für größere Nähe zu den wichtigen Kunden sorgen. Diese sind beim Qualitätsstahl vor allem an Produkten aus dem kontinuierlich wachsenden Hochwertsegment interessiert. Im Edelstahlbereich verfügt ThyssenKrupp bereits über eine solide Kundenbasis, die über das neue Angebot spezieller Abmessungen und produktorientierter Lösungen ausgebaut werden soll. —>



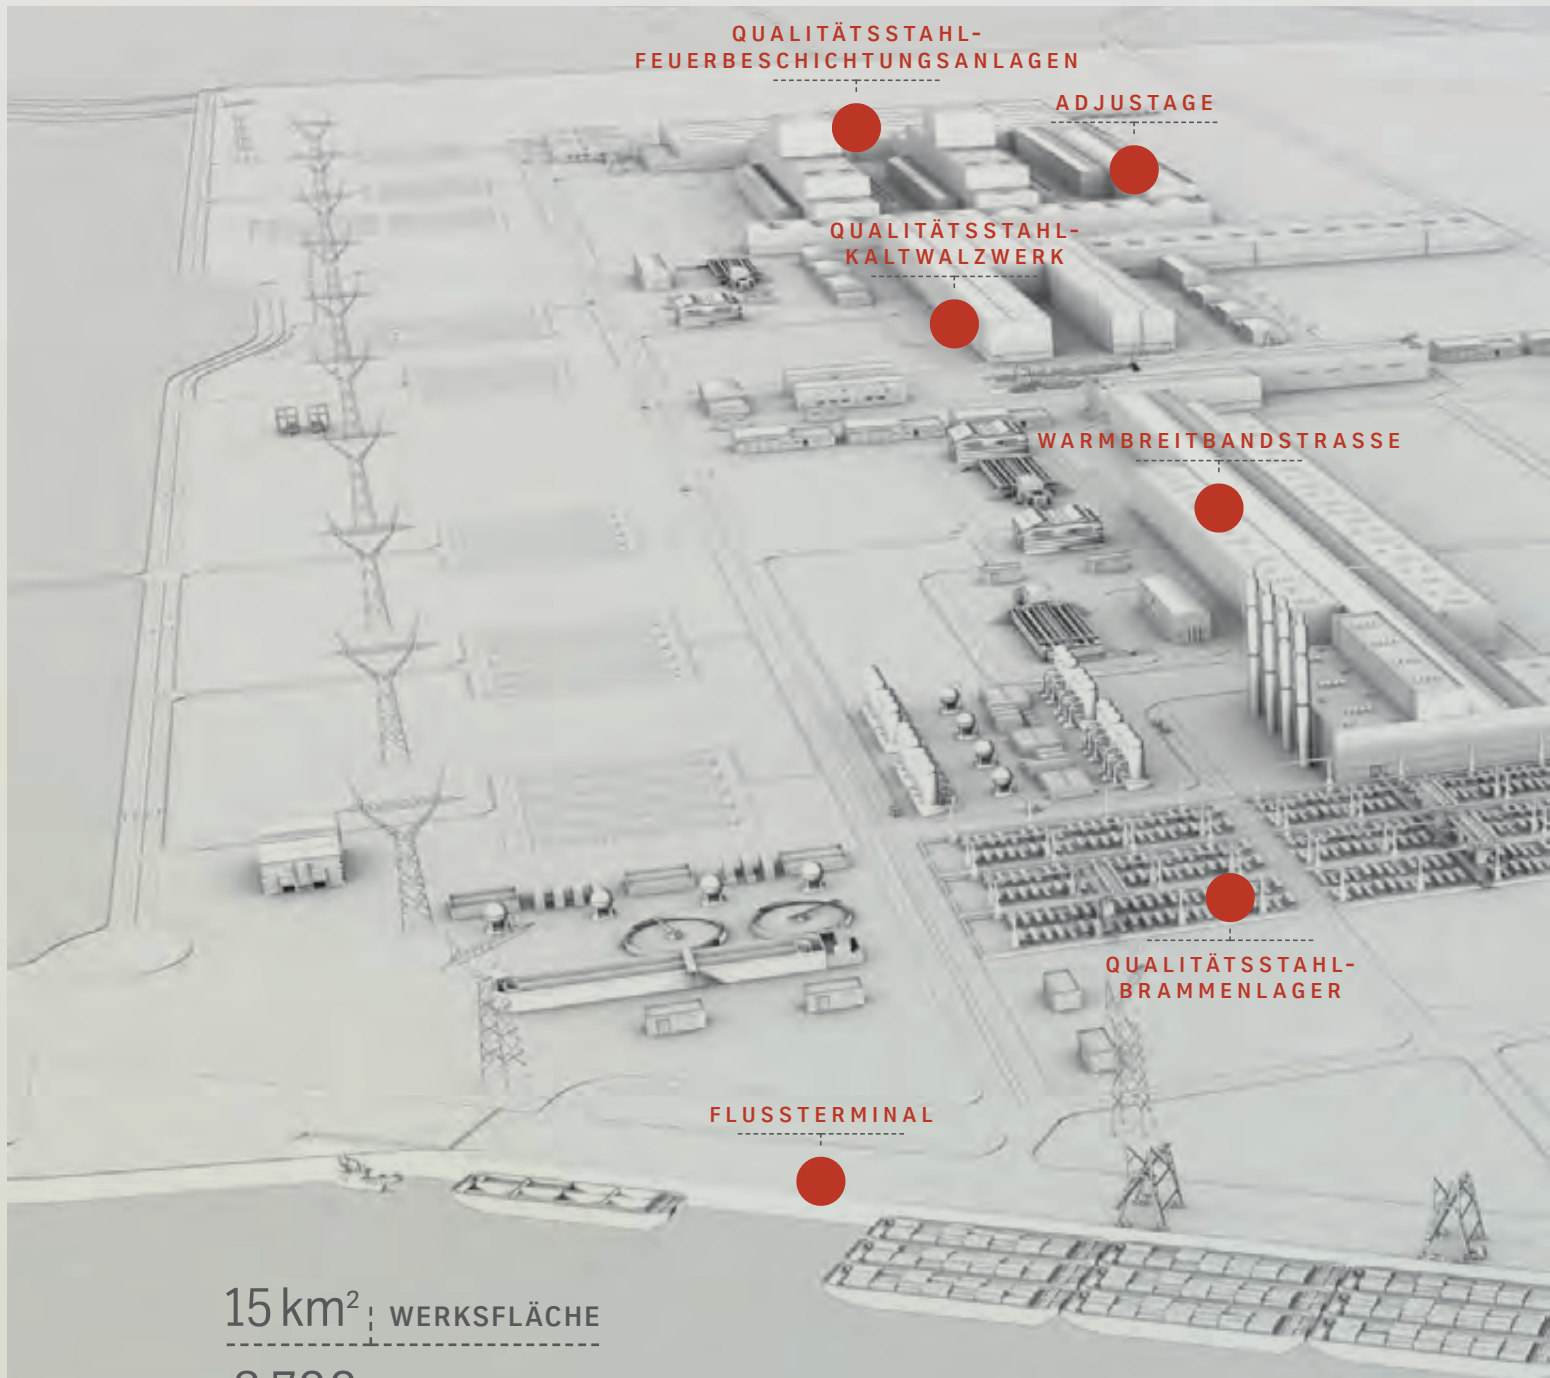

15 km<sup>2</sup> | WERKSFLÄCHE

2.700 | NEUE ARBEITSPLÄTZE

5.000.000 t | KAPAZITÄT DER WARMBREITBANDSTRASSE

| ENTSPRICHT STRENGSTEN UMWELTSTANDARDS

| UMFASSENDE ENERGIERÜCKGEWINNUNGS-  
| UND WIEDERVERWERTUNGSTECHNOLOGIEN

| HÖCHSTE QUALITÄTSANSPRÜCHE  
| BEI ABMESSUNGEN UND TOLERANZEN



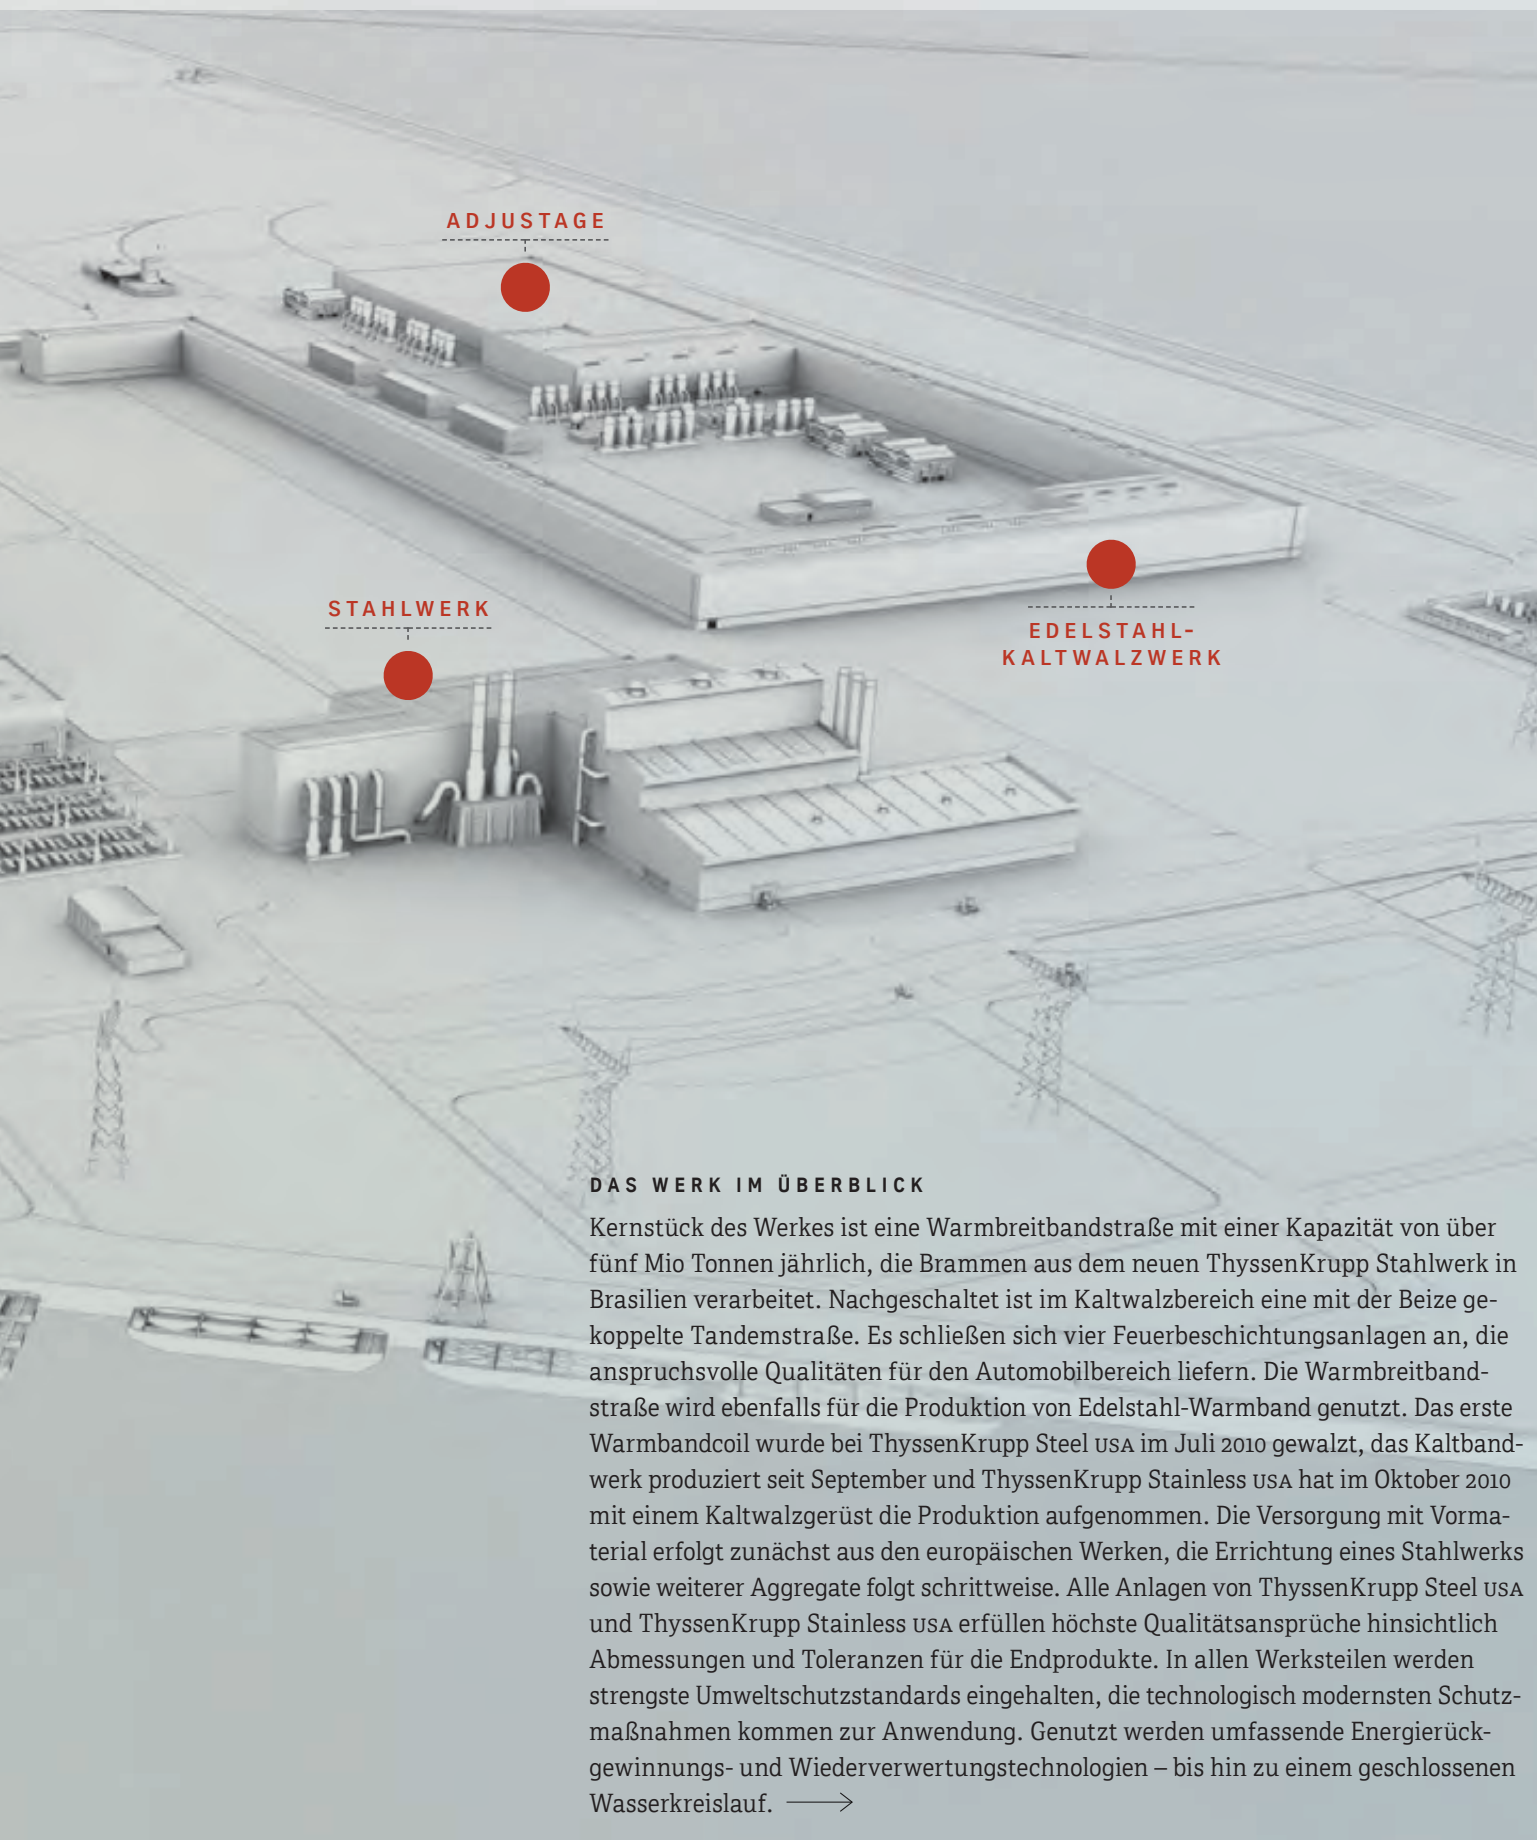

#### DAS WERK IM ÜBERBLICK

Kernstück des Werkes ist eine Warmbreitbandstraße mit einer Kapazität von über fünf Mio Tonnen jährlich, die Brammen aus dem neuen ThyssenKrupp Stahlwerk in Brasilien verarbeitet. Nachgeschaltet ist im Kaltwalzbereich eine mit der Beize gekoppelte Tandemstraße. Es schließen sich vier Feuerbeschichtungsanlagen an, die anspruchsvolle Qualitäten für den Automobilbereich liefern. Die Warmbreitbandstraße wird ebenfalls für die Produktion von Edelstahl-Warmband genutzt. Das erste Warmbandcoil wurde bei ThyssenKrupp Steel USA im Juli 2010 gewalzt, das Kaltbandwerk produziert seit September und ThyssenKrupp Stainless USA hat im Oktober 2010 mit einem Kaltwalzgerüst die Produktion aufgenommen. Die Versorgung mit Vormaterial erfolgt zunächst aus den europäischen Werken, die Errichtung eines Stahlwerkes sowie weiterer Aggregate folgt schrittweise. Alle Anlagen von ThyssenKrupp Steel USA und ThyssenKrupp Stainless USA erfüllen höchste Qualitätsansprüche hinsichtlich Abmessungen und Toleranzen für die Endprodukte. In allen Werksteilen werden strengste Umweltschutzstandards eingehalten, die technologisch modernsten Schutzmaßnahmen kommen zur Anwendung. Genutzt werden umfassende Energierückgewinnungs- und Wiederverwertungstechnologien – bis hin zu einem geschlossenen Wasserkreislauf. —>



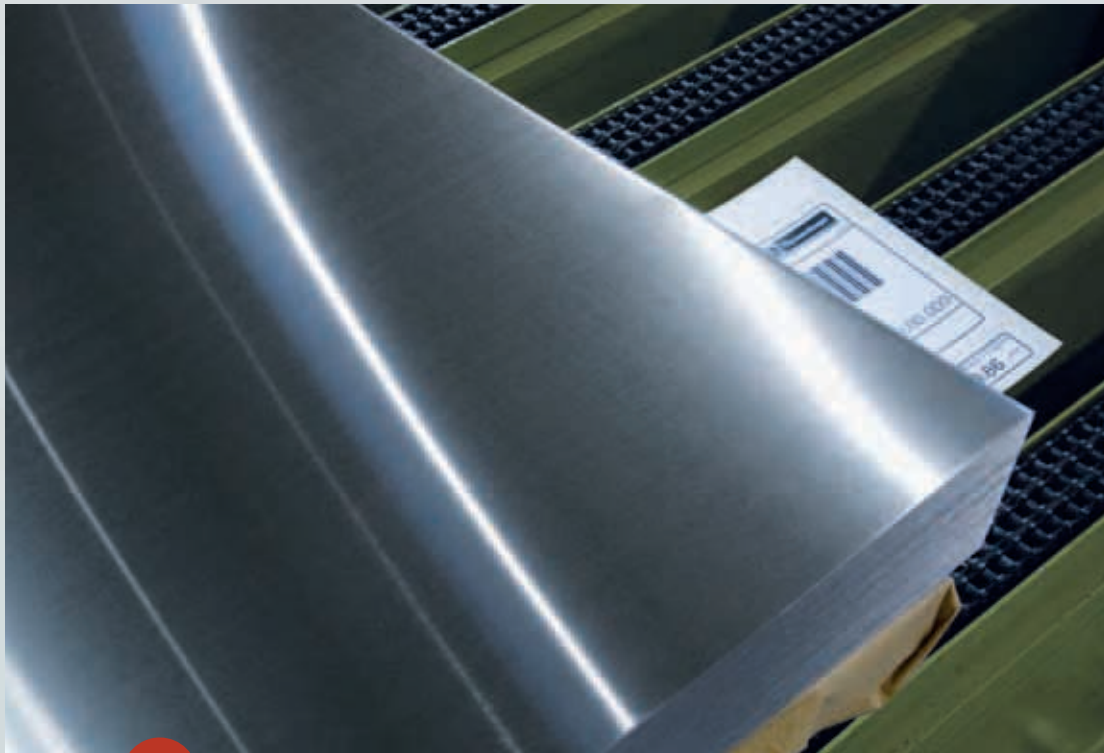

Abb. 04

Innovationskraft und Werkstoffkompetenz ermöglichen  
Produkte, die am Markt sehr gefragt sind.

*Produzenten von Automobilen und  
Haushaltsgeräten in unmittelbarer Umgebung  
brauchen hochwertigen Flachstahl.*

#### NEUE MÄRKTE, ERWEITERTE CHANCEN

Im NAFTA-Raum hat vor allem Qualitätsflachstahl im Hochwertsegment Wachstumspotenzial **ABB. 04**. Da ThyssenKrupp hier bisher kaum vertreten war, wird dieser Markt künftig stärker erschlossen. Vor allem die ambitionierten Anforderungen im Automobilbau werden durch das neue Werk umfassend erfüllt werden. Um die Potenziale zu nutzen, werden zahlreiche Gespräche mit Schlüsselkunden auf den Feldern Automobil- und Elektroindustrie sowie Stahl-Service-Center und Rohrindustrie geführt, erste Aufträge von Kunden aus dem NAFTA-Raum wurden bereits gebucht. Gute Wachstumschancen bei Edelstahl-Flachprodukten waren einer der Gründe für den Bau eines optimierten Edelstahl-Produktionsstandorts auf dem nordamerikanischen Markt. Die Kunden können ihr Material jetzt direkt aus dem neuen Werk beziehen und finden hier Ansprechpartner für ihre speziellen Anforderungen. ThyssenKrupp Stainless USA profitiert beim Vertrieb auch von den kurzen Wegen zu den industriellen Zentren im Süden der USA, in Mexiko sowie Kanada. —>



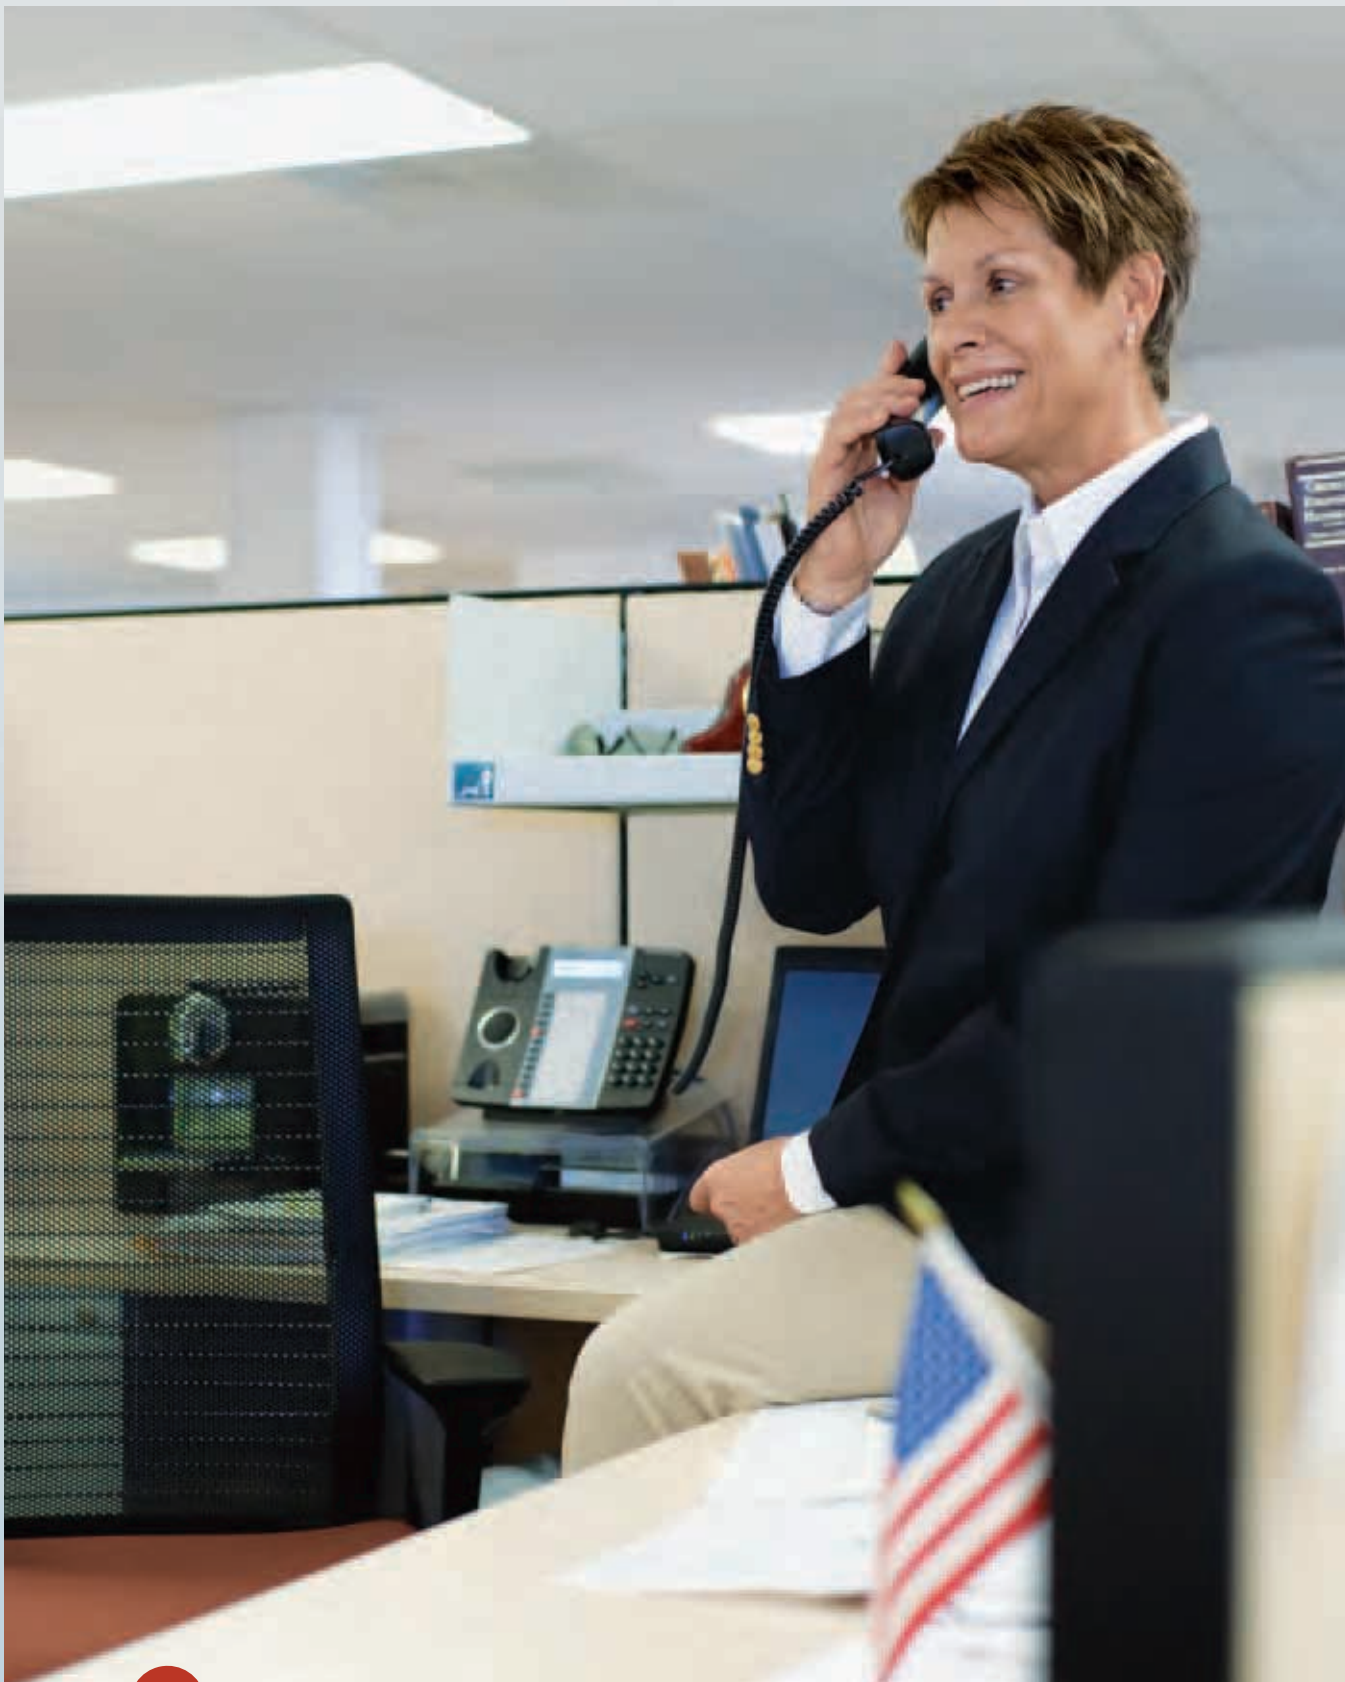

Abb. 05

Hariett Dutka, Teamleiterin Rohstoffe und Schmelzbetrieb ThyssenKrupp Stainless usa, optimiert den Fertigungsprozess im Hinblick auf die Umweltauflagen.



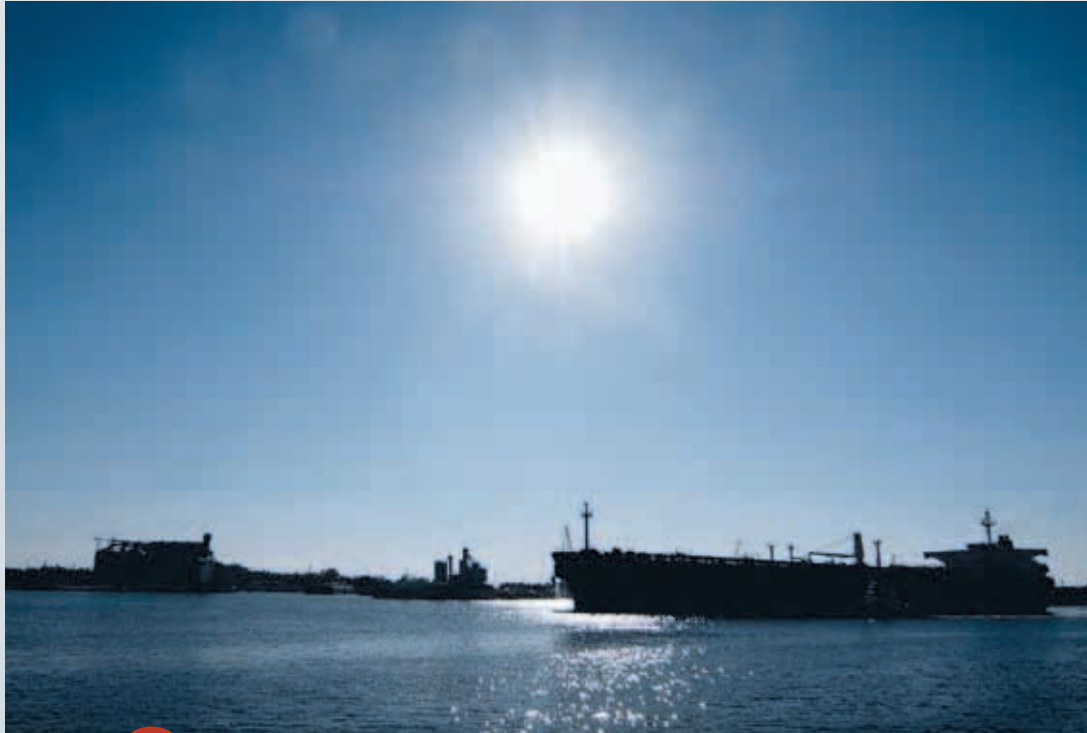

Abb. 06

Der Hafen von Mobile ist die logistische  
Drehscheibe für Rohstoffe und Fertigmaterial.

#### VERANTWORTUNG UMSETZEN

Die Auswirkungen der neuen Anlage auf die Region sind vielfältig. Das Verarbeitungswerk wird in Calvert 2.700 qualifizierte Dauerarbeitsplätze in allen Bereichen von Produktion und Verwaltung bieten. Zur Qualifikation der Mitarbeiter wird umfassend in Ausbildung und Fortbildung investiert, unter anderem durch das Maßstäbe setzende Erich Heine-Ausbildungszentrum. Ebenfalls positiv wirken sich für die Region die zahlreichen weiteren Arbeitsplätze aus, die indirekt als Folge der Ansiedlung entstehen. Wie an allen Standorten weltweit engagiert sich ThyssenKrupp auch in Alabama gesellschaftlich. Unter anderem werden Bildung und soziale Projekte gefördert, mit gesellschaftlichen Organisationen, Schulen und Universitäten werden Partnerschaften entwickelt.



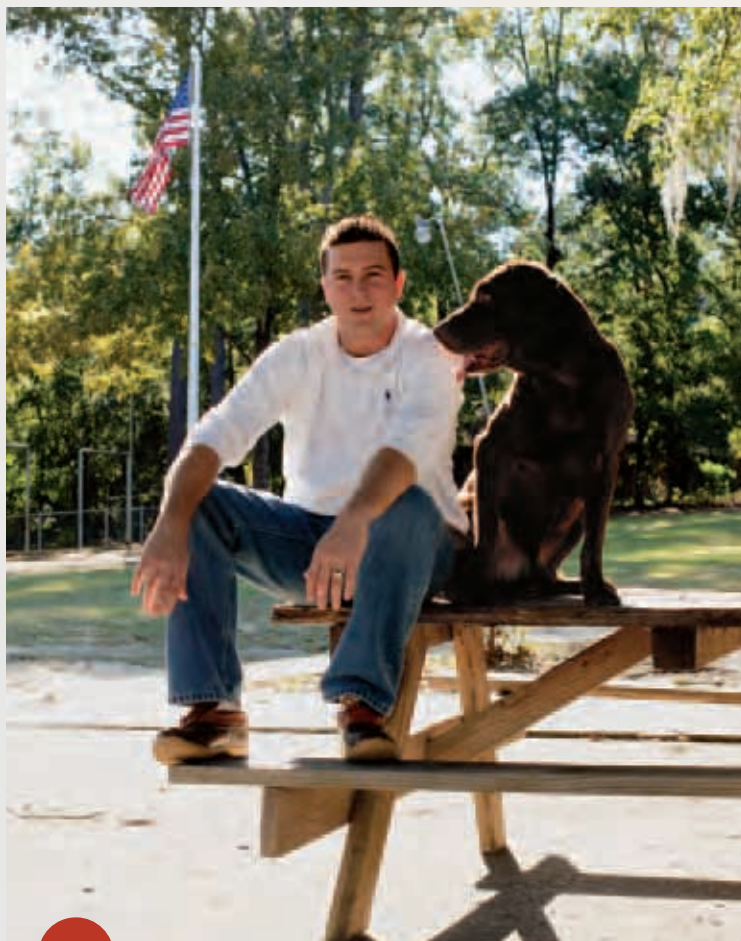

Abb. 07

Clint Skipper wurde bei ThyssenKrupp Nirosta in Dillenburg als Walzer ausgebildet. Mittlerweile trainiert er seine Kollegen in Calvert.

Bereits die Errichtung des Werkes hatte einen positiven Einfluss auf die Region. Als guter Nachbar engagiert ThyssenKrupp sich auch direkt in Gemeinden und Kommunen.



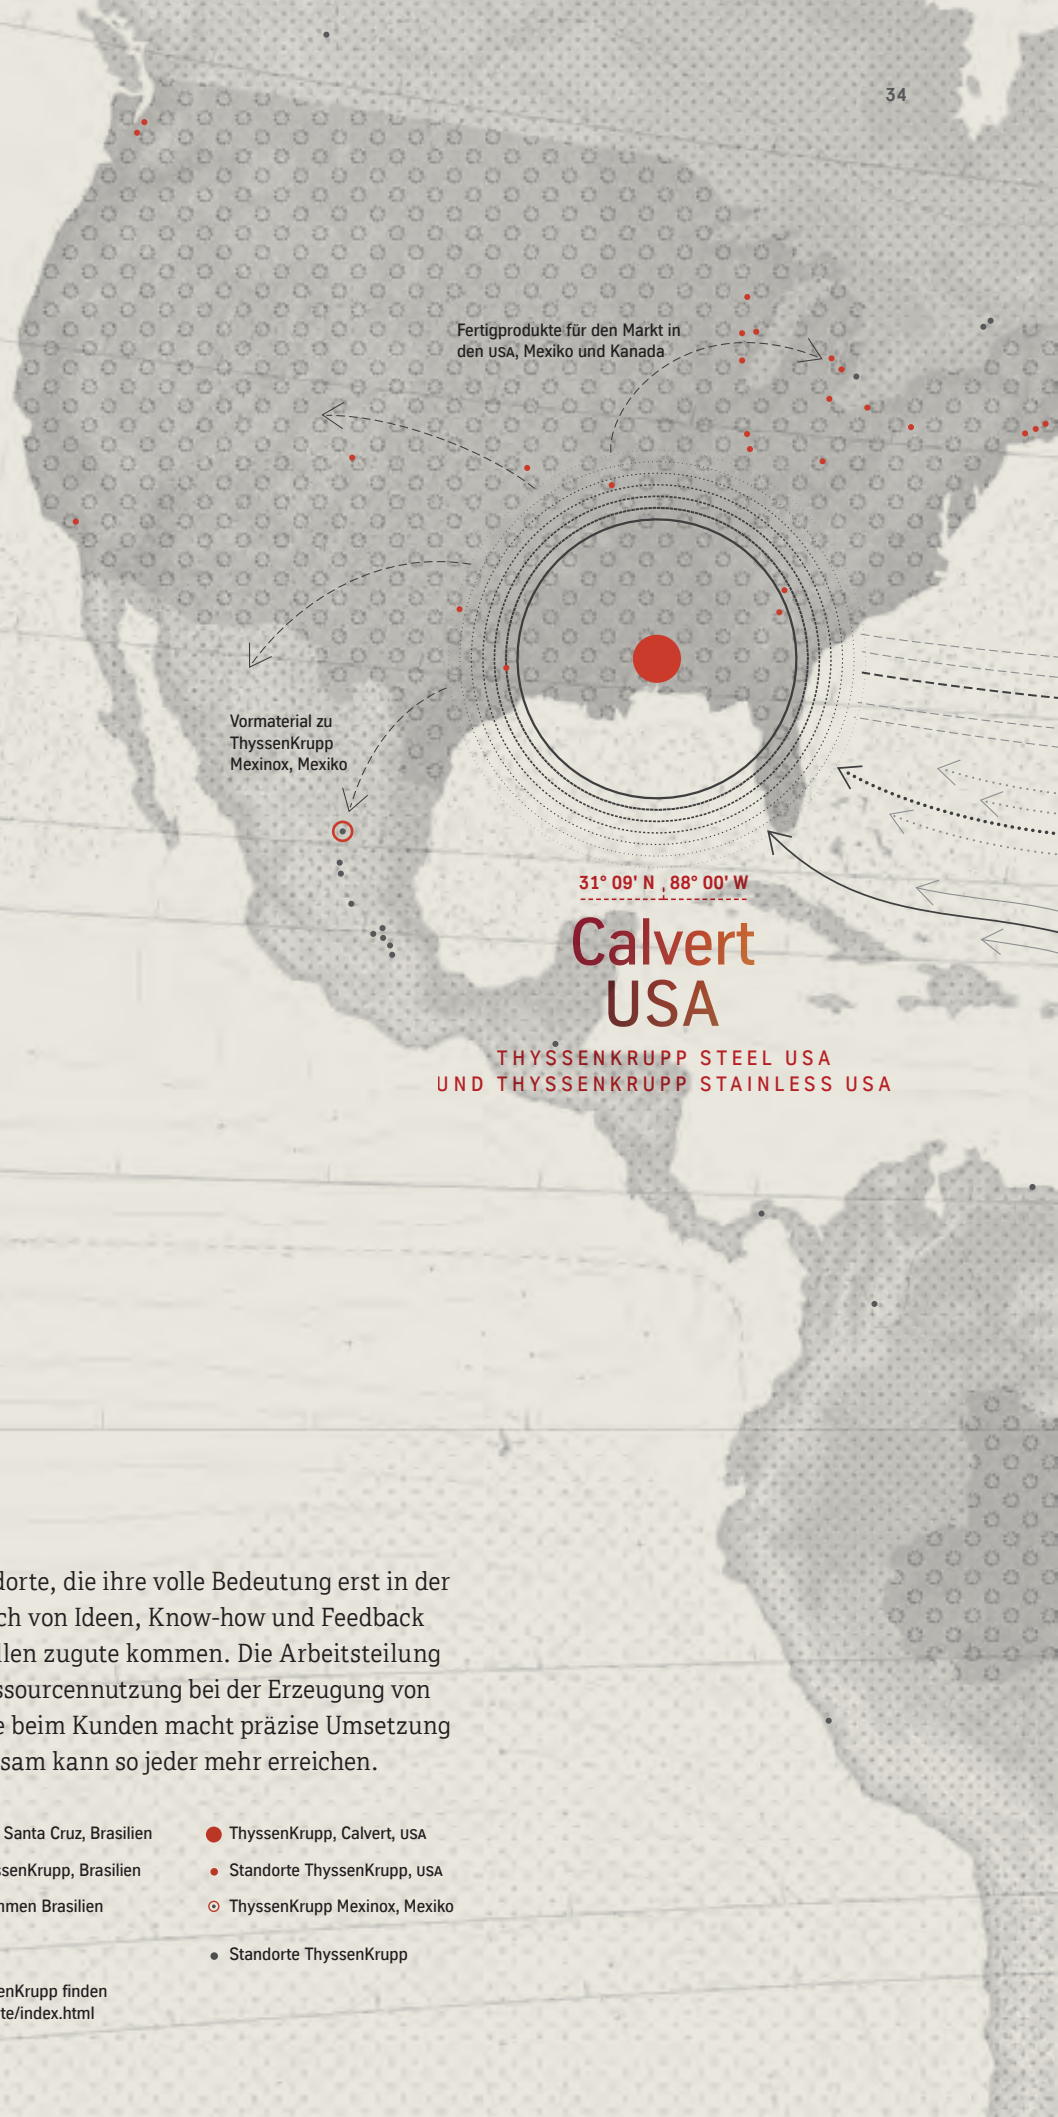

## VOM AUSTAUSCH PROFITIEREN

Deutschland, Brasilien, USA: drei neue Standorte, die ihre volle Bedeutung erst in der Interaktion erlangen. Der weltweite Austausch von Ideen, Know-how und Feedback von Kunden ermöglicht Innovationen, die allen zugute kommen. Die Arbeitsteilung über Kontinente hinweg erlaubt effiziente Ressourcennutzung bei der Erzeugung von Vormaterialien. Die Weiterverarbeitung nahe beim Kunden macht präzise Umsetzung von Kundenspezifikationen möglich. Gemeinsam kann so jeder mehr erreichen.

- |                                             |                                       |                                |
|---------------------------------------------|---------------------------------------|--------------------------------|
| ● ThyssenKrupp Quartier, Essen, Deutschland | ● ThyssenKrupp, Santa Cruz, Brasilien | ● ThyssenKrupp, Calvert, USA   |
| ⊙ ThyssenKrupp, Duisburg, Deutschland       | ● Standorte ThyssenKrupp, Brasilien   | ● Standorte ThyssenKrupp, USA  |
| ● Standorte ThyssenKrupp, Deutschland       | ◇ Eisenerzvorkommen Brasilien         | ⊙ ThyssenKrupp Mexinox, Mexiko |
|                                             |                                       | ● Standorte ThyssenKrupp       |

➔ Nähere Informationen zu weiteren Standorten von ThyssenKrupp finden Sie im Internet unter [www.thyssenkrupp.com/de/standorte/index.html](http://www.thyssenkrupp.com/de/standorte/index.html)



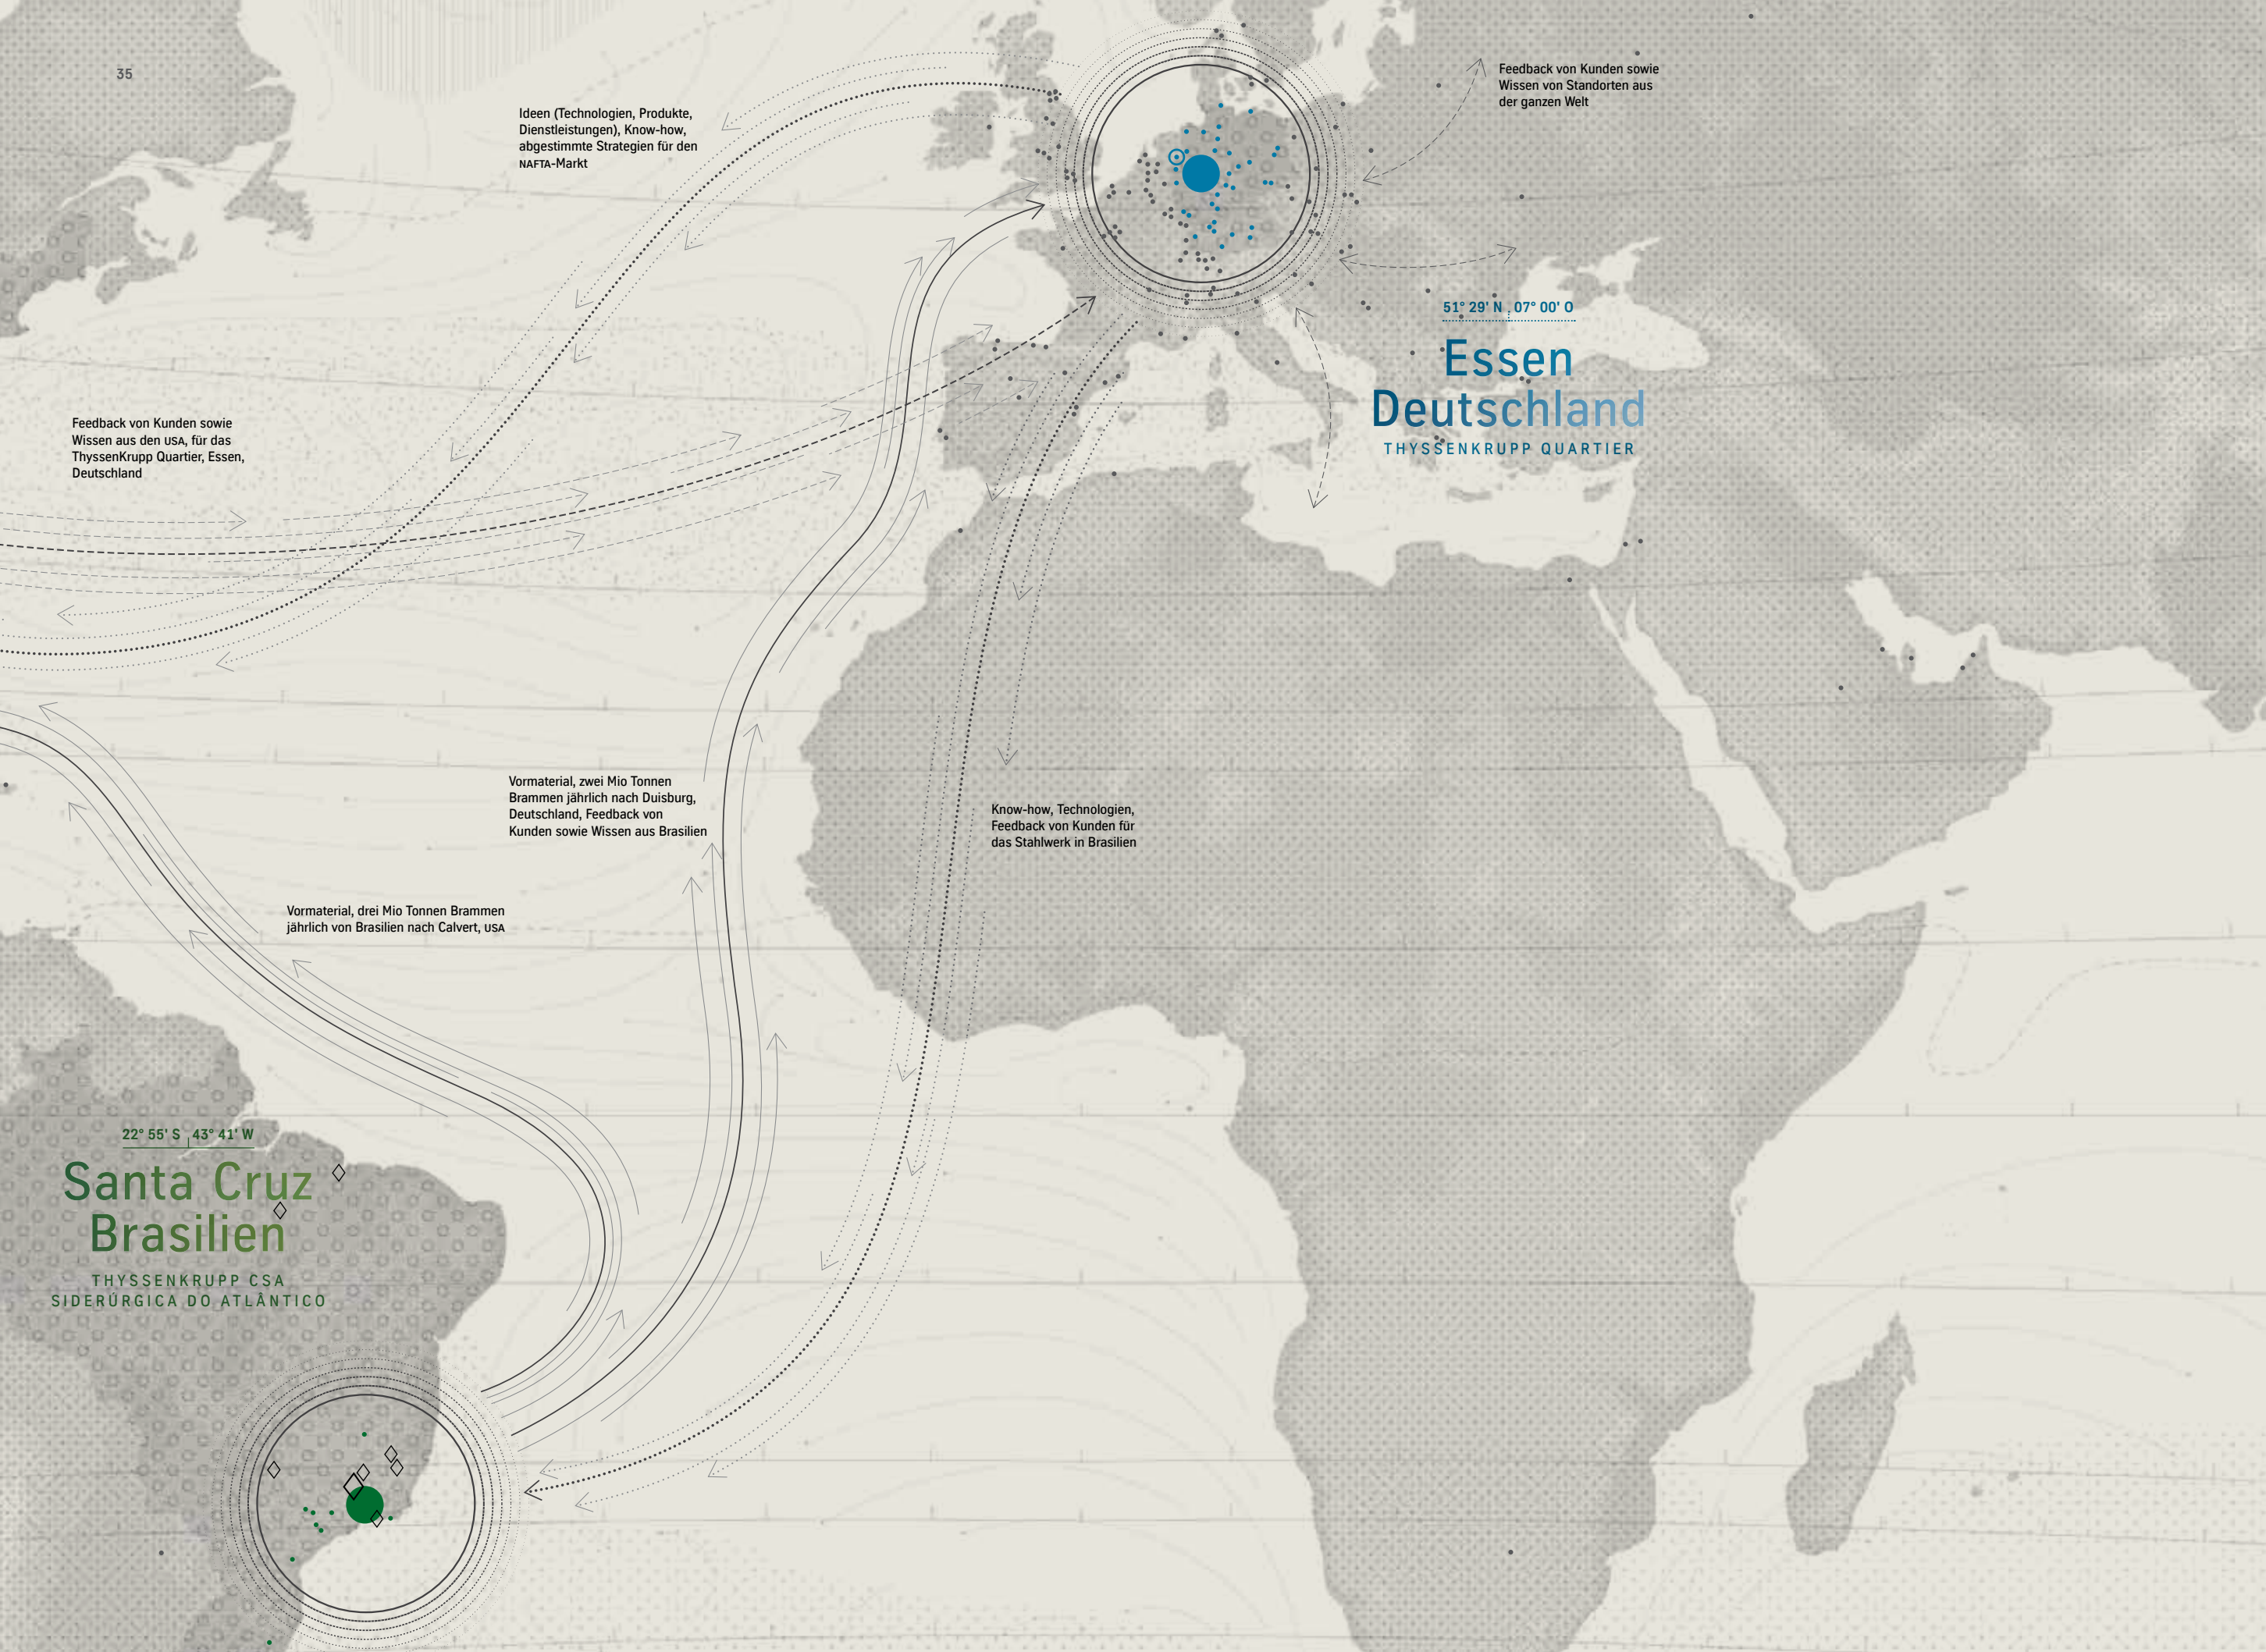

Ideen (Technologien, Produkte, Dienstleistungen), Know-how, abgestimmte Strategien für den NAFTA-Markt

Feedback von Kunden sowie Wissen von Standorten aus der ganzen Welt

51° 29' N , 07° 00' 0

Essen  
Deutschland  
THYSSENKRUPP QUARTIER

Feedback von Kunden sowie Wissen aus den USA, für das ThyssenKrupp Quartier, Essen, Deutschland

Vormaterial, zwei Mio Tonnen Brammen jährlich nach Duisburg, Deutschland, Feedback von Kunden sowie Wissen aus Brasilien

Know-how, Technologien, Feedback von Kunden für das Stahlwerk in Brasilien

Vormaterial, drei Mio Tonnen Brammen jährlich von Brasilien nach Calvert, USA

22° 55' S , 43° 41' W

Santa Cruz  
Brasilien

THYSSENKRUPP CSA  
SIDERÚRGICA DO ATLÂNTICO



09 : 10 Ein neuer Standort ist immer auch ein wichtiger Impulsgeber für ein Unternehmen. Mit neuen Kompetenzen im Team – bei Mitarbeitern, Kunden, Partnern. Mit neuen Möglichkeiten, frische Ideen und Lösungen zu entwickeln. Mit neuen Chancen, Märkte aufzubauen und Kunden überzeugende Angebote zu machen. Wir werden unsere Chancen nutzen. In Deutschland, Brasilien, USA, weltweit.

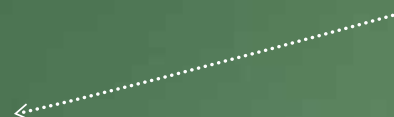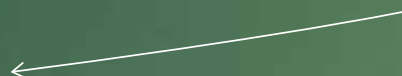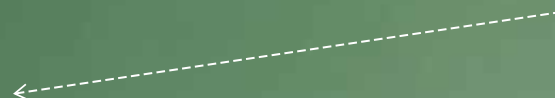

Entdecken Sie weitere weltweite Standorte hinter der Klappe.

Wir freuen uns, wenn dieses Magazin Sie überzeugt hat. Die Inhalte finden Sie auch im Internet unter [www.thyssenkrupp.com/de/magazin/unsere-neuen-zukunftsorte/](http://www.thyssenkrupp.com/de/magazin/unsere-neuen-zukunftsorte/). Sollten Sie sich für weitere Themen interessieren, melden Sie sich auf [www.thyssenkrupp.com/de/newsletter/index.html](http://www.thyssenkrupp.com/de/newsletter/index.html) für unseren Newsletter an.

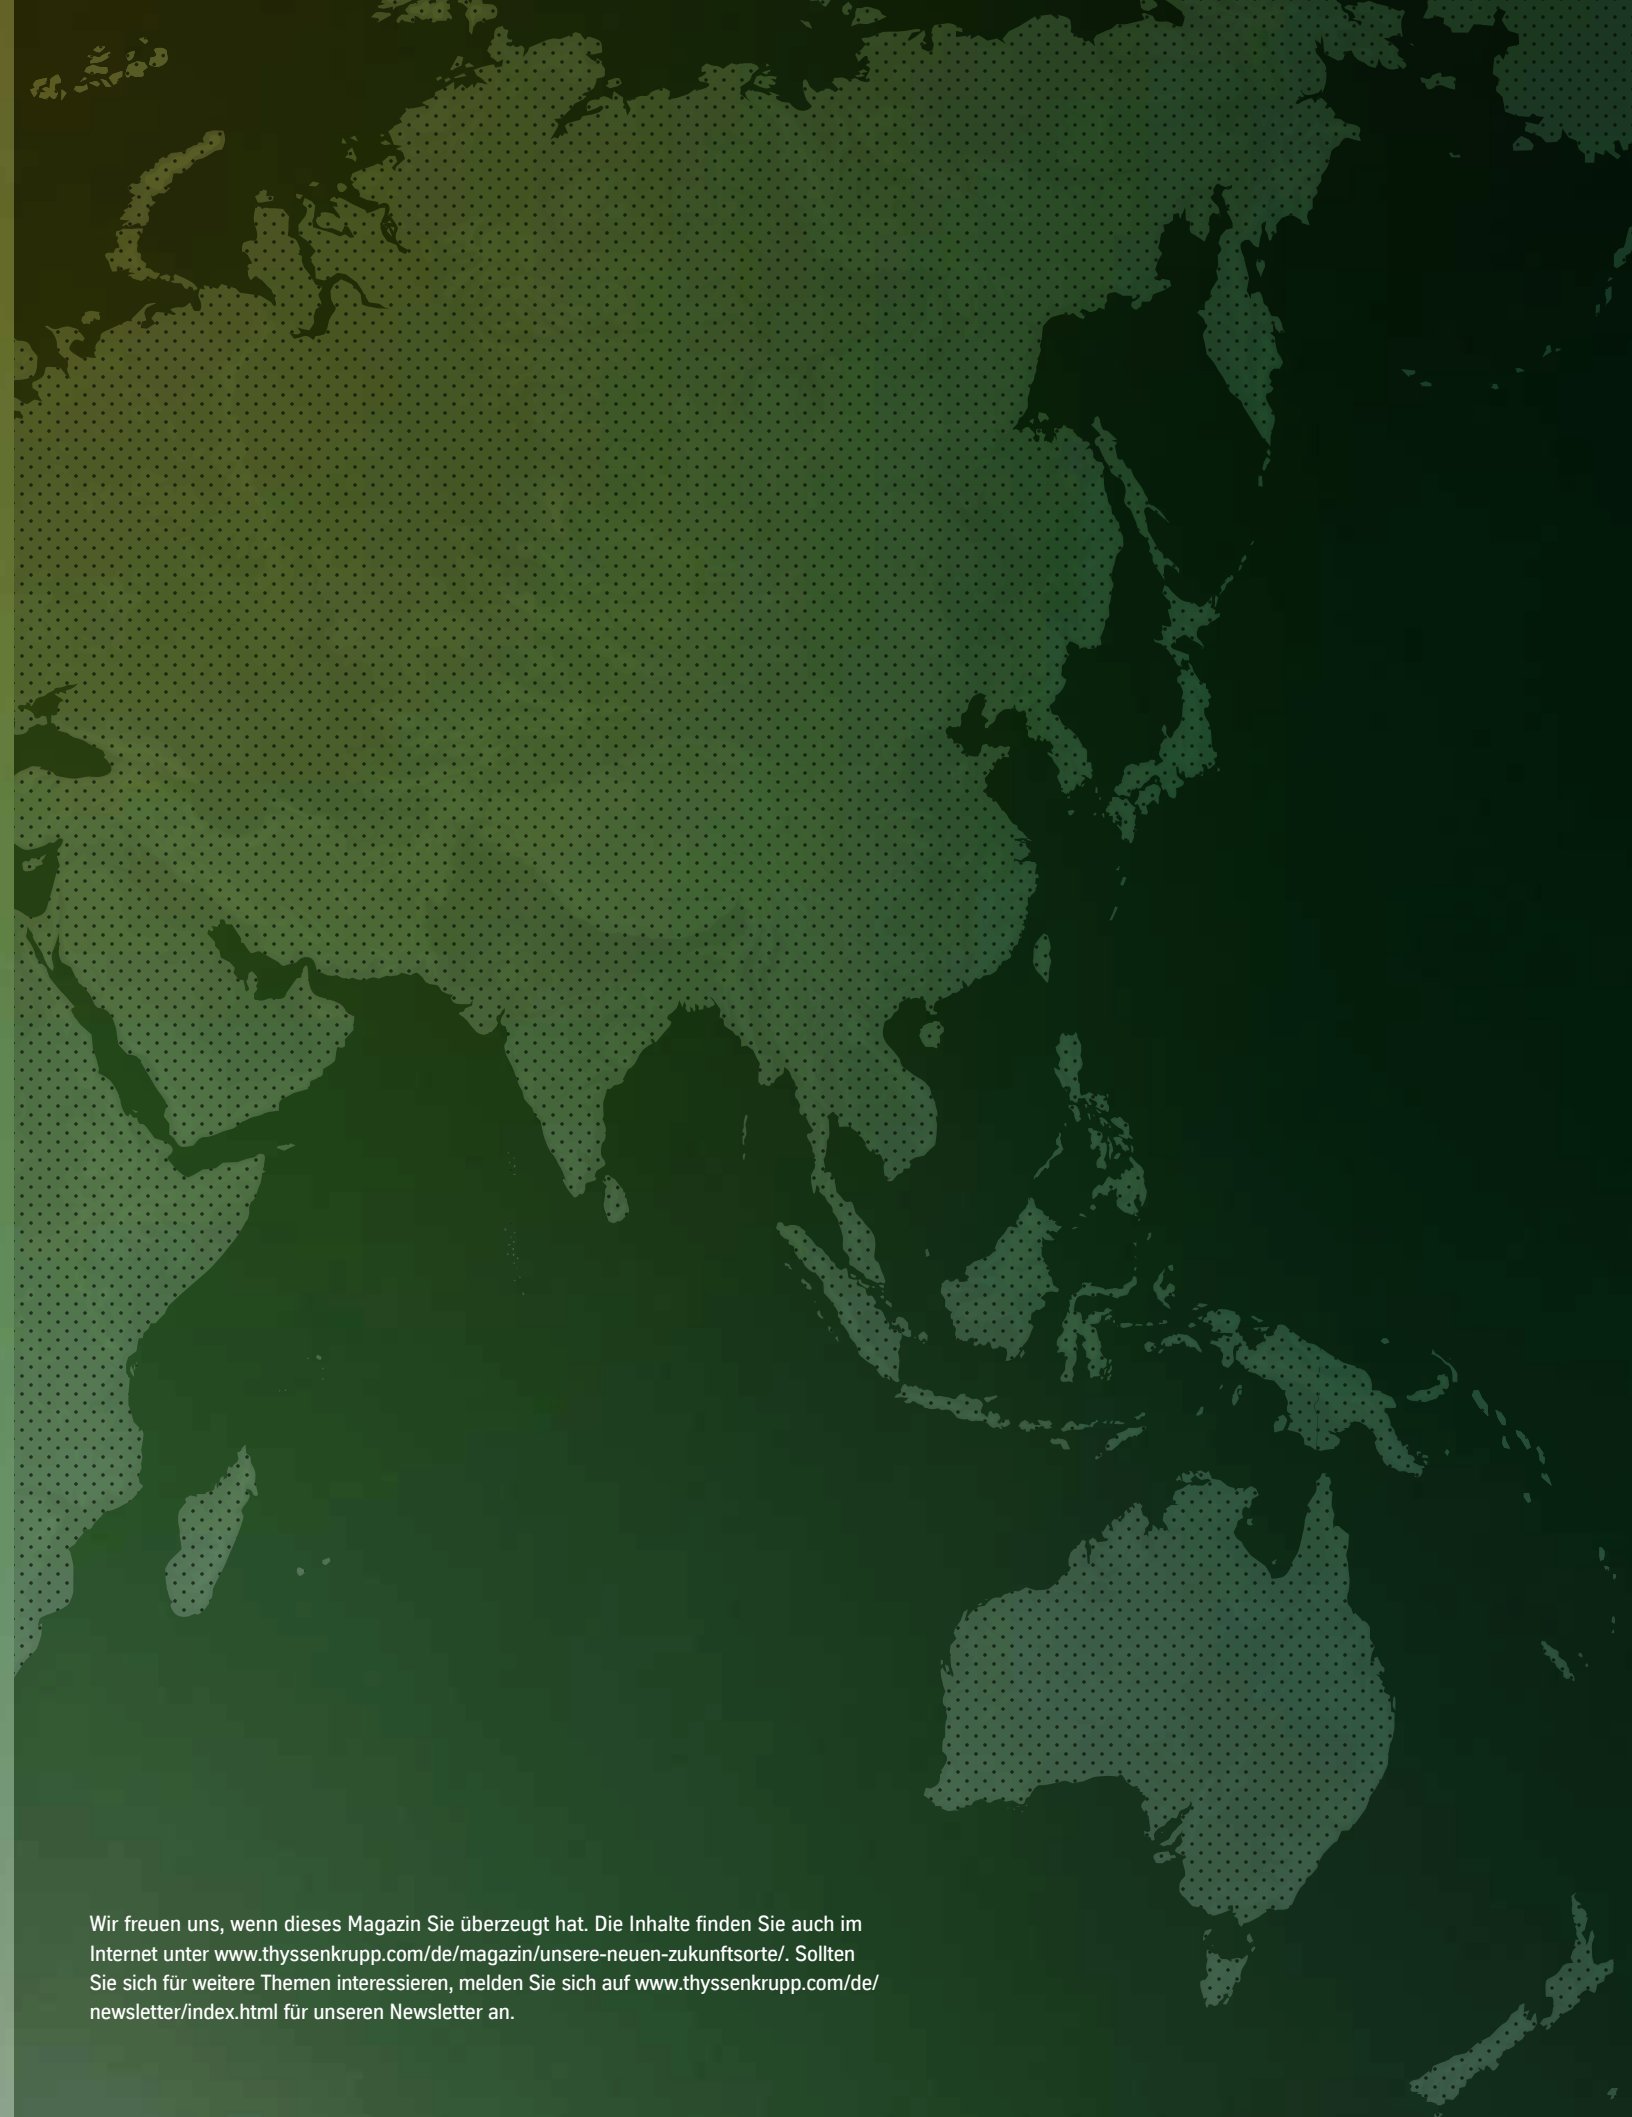



- U2 ThyssenKrupp im Überblick:  
Unsere Zahlen, Der Konzern in Kürze, ThyssenKrupp weltweit,  
Die Unternehmensstruktur, Unsere Business Areas, Finanztermine
- U3 Brief an die Aktionäre

## Magazin

- 01 Einblicke.  
Unsere neuen Zukunftsorte. Für Menschen, Ideen, Lösungen.
- 39 Inhalt

## Zahlen und Fakten

### An unsere Aktionäre

- 45 Vorstand und Aufsichtsrat  
50 Bericht des Aufsichtsrats  
58 Corporate-Governance-Bericht  
75 ThyssenKrupp Aktie

### Konzernlagebericht

- 85 Geschäftsfelder und Organisationsstruktur  
91 Unternehmenssteuerung – Ziele und Strategie  
100 Überblick über den Geschäftsverlauf im Konzern  
117 Geschäftsverlauf in den Business Areas  
135 Finanz- und Vermögenslage  
142 Nachhaltigkeit  
144 Gesellschaftliches Engagement  
146 Innovationen  
152 Umwelt- und Klimaschutz  
157 Mitarbeiter  
163 Risikobericht  
175 Nachtrags-, Chancen- und Prognosebericht

### Konzernabschluss

- 187 Konzern-Bilanz  
188 Konzern-Gewinn- und Verlustrechnung  
189 Konzern-Gesamtergebnisrechnung  
190 Konzern-Eigenkapitalveränderungsrechnung  
191 Konzern-Kapitalflussrechnung  
192 Konzern-Anhang  
209 Erläuterungen zur Konzern-Bilanz  
249 Erläuterungen zur Konzern-Gewinn- und Verlustrechnung  
253 Erläuterungen zur Konzern-Kapitalflussrechnung  
253 Sonstige Angaben  
279 Bestätigungsvermerk des Abschlussprüfers  
280 Versicherung der gesetzlichen Vertreter

### Weitere Informationen

- 285 Mehrjahresübersicht  
287 Mandate des Vorstands  
288 Mandate des Aufsichtsrats  
290 Stichwortverzeichnis  
292 Glossar  
293 Abkürzungsverzeichnis  
294 Kontakt/Termine 2011/2012

01

S. 41–80

02

S. 81–182

03

S. 183–280

04

S. 281–294



## Impulse geben

Verantwortliches Handeln und gesellschaftliches Engagement sind für ThyssenKrupp seit jeher feste Bestandteile der Unternehmenskultur. Um dieser Verantwortung auch künftig gerecht zu werden, ist wirtschaftlicher Erfolg eine Grundvoraussetzung. Gleichzeitig sind wir überzeugt, dass verantwortliches Handeln zum langfristigen Unternehmenserfolg beiträgt. Deshalb ist unternehmerische Verantwortung auch ein wichtiger Erfolgsfaktor zur Erreichung unserer langfristigen Ziele. Wie wir unserem Handeln entsprechende Impulse geben und wie sich diese grundsätzlich sowie beispielhaft für unsere drei neuen Standorte in Deutschland, Brasilien und den USA auswirken, erfahren Sie auf vier Kapiteltrennseiten dieses Geschäftsberichts.

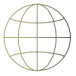

Fördern schafft weltweit Erfolge  
S. 43

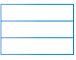

ThyssenKrupp Quartier, Essen, Deutschland  
S. 83

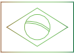

ThyssenKrupp csa Siderúrgica do Atlântico,  
Santa Cruz, Brasilien  
S. 185

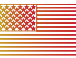

ThyssenKrupp Steel USA und ThyssenKrupp  
Stainless USA, Calvert, Alabama, USA  
S. 283



# An unsere Aktionäre

S. 41–80

# 01

Gute Unternehmensleitung und -kontrolle setzen voraus, dass Vorstand und Aufsichtsrat eng und vertrauensvoll zusammenarbeiten – im Unternehmensinteresse und mit dem Ziel, den Wert des Unternehmens nachhaltig zu steigern. Mehr über die beiden Gremien, die bei ThyssenKrupp praktizierte Corporate Governance und die Entwicklung der Aktie im Geschäftsjahr 2009/2010 erfahren Sie im folgenden Abschnitt. Der Corporate-Governance-Bericht enthält auch die Erklärung zur Unternehmensführung nach § 289a HGB.

## Inhalt

- 45 Vorstand und Aufsichtsrat**
  - Vorstand, 46
  - Aufsichtsrat, 48
  - Ausschüsse des Aufsichtsrats, 49
- 50 Bericht des Aufsichtsrats**
- 58 Corporate-Governance-Bericht**
  - Erklärung zur Unternehmensführung, 58
  - Weitere Angaben zur Corporate Governance bei ThyssenKrupp, 63
  - Vergütungsbericht, 67
- 75 ThyssenKrupp Aktie**



## Fördern schafft weltweit Erfolge

Mit jedem unserer weltweiten Standorte setzen wir bewusst – über die wirtschaftliche Bedeutung für das Unternehmen hinaus – fördernde Impulse für die umgebende Region, deren Menschen und die Umwelt. Neben der Schaffung von direkten und indirekten Arbeitsplätzen zählt dazu vor allem die wirtschaftliche Stärkung ganzer Gebiete. Zudem trägt ThyssenKrupp aktiv dazu bei, die Lebenssituation der Menschen vor Ort durch konkretes Engagement zu verbessern.

Schaffung neuer qualifizierter Arbeitsplätze

Etablierung hoher Umwelt- und Nachhaltigkeitsstandards

Wirtschaftliche Stärkung von Regionen

Förderung von Bildung und Ausbildung

Unterstützung von Kommunen und Gemeinwesen

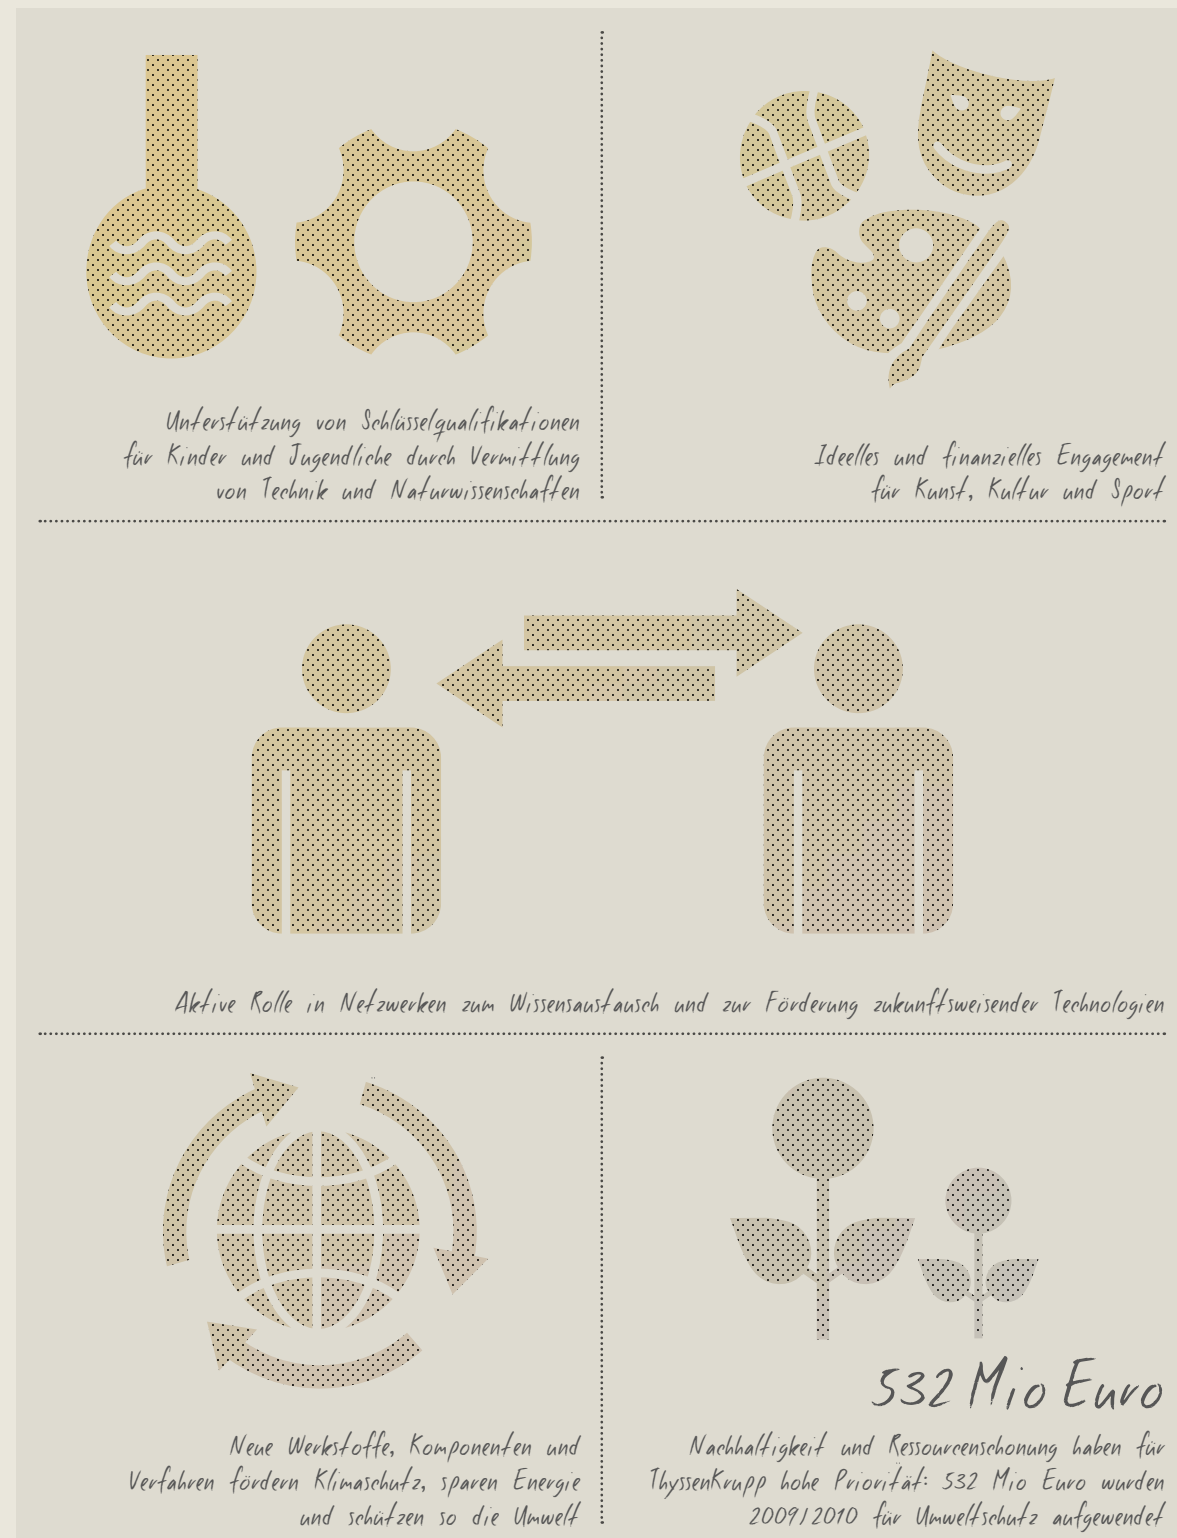

Impulse geben

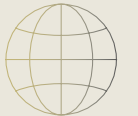



# Vorstand und Aufsichtsrat

Entsprechend der dualen Unternehmensverfassung haben Aktiengesellschaften in Deutschland zwei Führungsorgane mit klar getrennten Funktionen: Der Vorstand leitet eigenverantwortlich das Unternehmen; der Aufsichtsrat beaufsichtigt und berät den Vorstand. Beide arbeiten im Unternehmensinteresse eng zusammen. Im Folgenden stellen wir Ihnen den Vorstand und den Aufsichtsrat vor.



## Vorstand

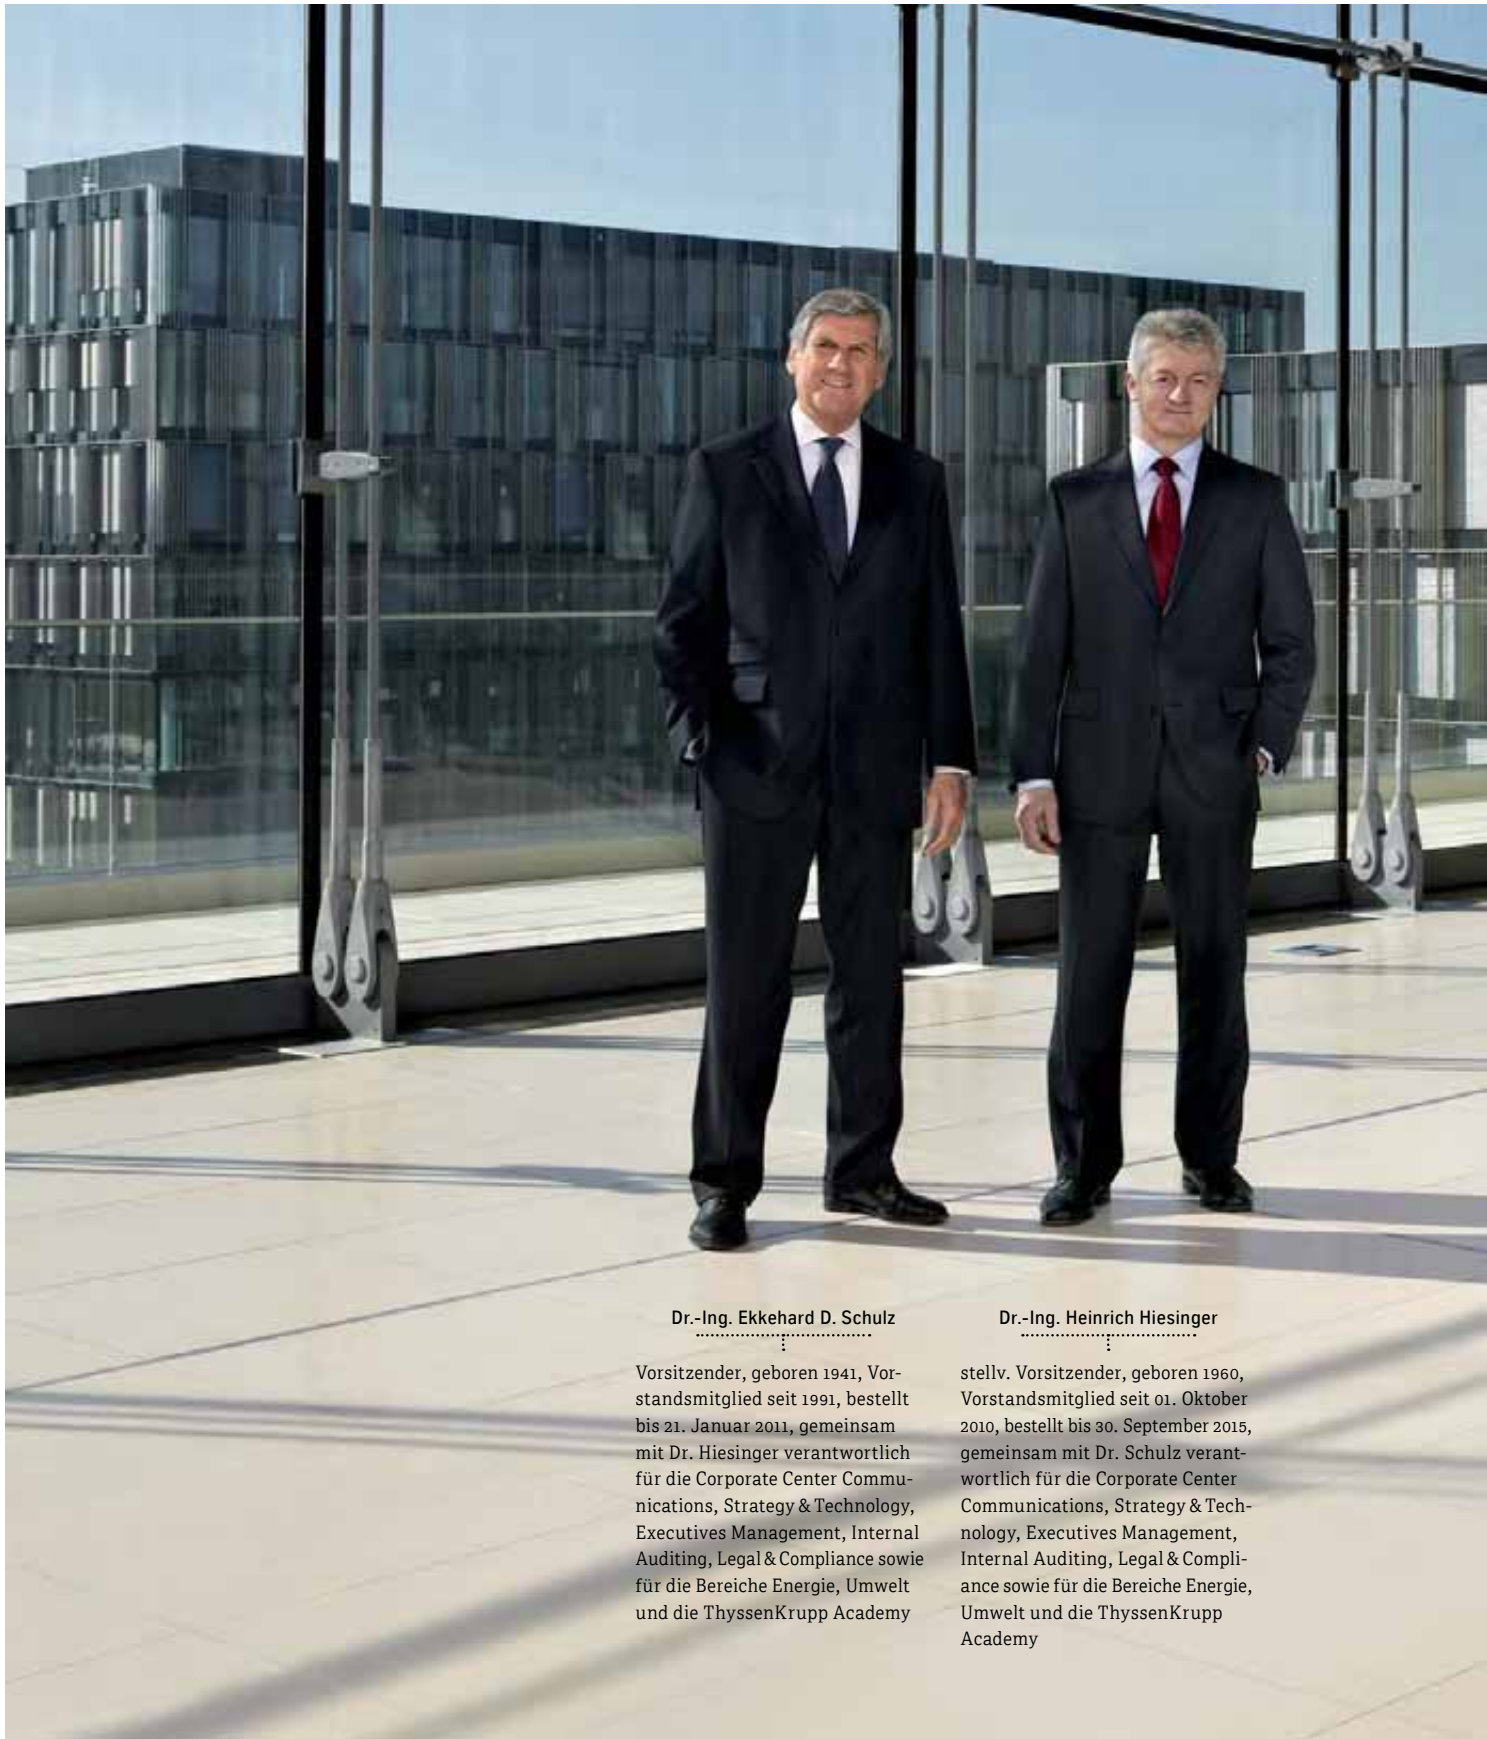

**Dr.-Ing. Ekkehard D. Schulz**

Vorsitzender, geboren 1941, Vorstandsmitglied seit 1991, bestellt bis 21. Januar 2011, gemeinsam mit Dr. Hiesinger verantwortlich für die Corporate Center Communications, Strategy & Technology, Executives Management, Internal Auditing, Legal & Compliance sowie für die Bereiche Energie, Umwelt und die ThyssenKrupp Academy

**Dr.-Ing. Heinrich Hiesinger**

stellv. Vorsitzender, geboren 1960, Vorstandsmitglied seit 01. Oktober 2010, bestellt bis 30. September 2015, gemeinsam mit Dr. Schulz verantwortlich für die Corporate Center Communications, Strategy & Technology, Executives Management, Internal Auditing, Legal & Compliance sowie für die Bereiche Energie, Umwelt und die ThyssenKrupp Academy



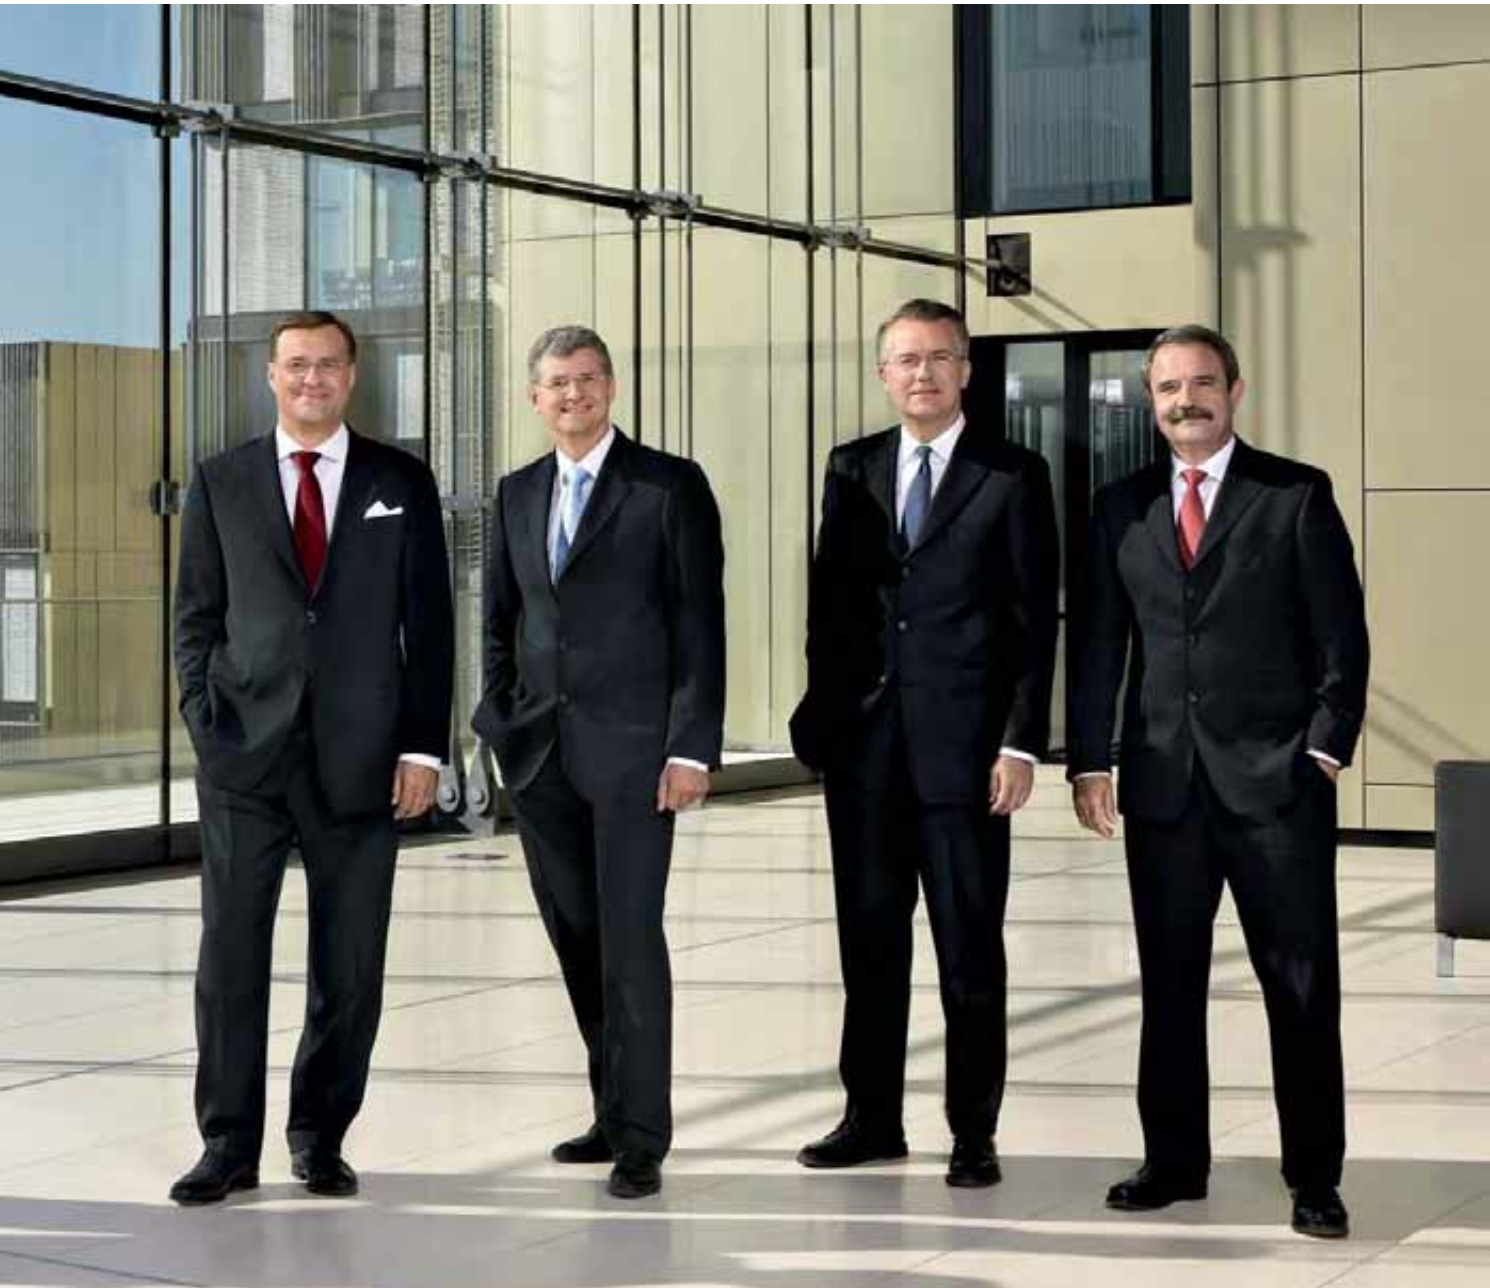

Dr. Olaf Berlien

zugleich Vorstandsvorsitzender der ThyssenKrupp Elevator AG, geboren 1962, Vorstandsmitglied seit 2002, bestellt bis 31. März 2012, verantwortlich für die Division Technologies

Edwin Eichler

zugleich Vorstandsvorsitzender der ThyssenKrupp Steel Europe AG, geboren 1958, Vorstandsmitglied seit 2002, bestellt bis 30. September 2012, verantwortlich für die Division Materials

Dr. Alan Hippe

geboren 1967, Vorstandsmitglied seit 2009, bestellt bis 31. März 2014, verantwortlich für die Corporate Center Accounting & Financial Reporting, Controlling, Corporate Finance, Investor Relations, Materials Management, Mergers & Acquisitions, Taxes & Customs sowie für Business Services und Risk and Insurance Services

Ralph Labonte

geboren 1953, Vorstandsmitglied seit 2003, bestellt bis 31. Dezember 2012, verantwortlich für die Corporate Center Human Resources, Information Management sowie für Dienstleistungen und Real Estate

Dr. Ulrich Middelmann ist mit Ablauf der Hauptversammlung am 21. Januar 2010 aus dem Vorstand ausgeschieden.

Abb. 02



## Aufsichtsrat

|                                                         |                                                                                                                                                                                                    |
|---------------------------------------------------------|----------------------------------------------------------------------------------------------------------------------------------------------------------------------------------------------------|
| Prof. Dr. h.c. mult. Berthold Beitz, Essen              | Ehrenvorsitzender, Vorsitzender des Kuratoriums der Alfried Krupp von Bohlen und Halbach-Stiftung                                                                                                  |
| Prof. Dr. Günter Vogelsang, Düsseldorf                  | Ehrenvorsitzender                                                                                                                                                                                  |
| Dr. Gerhard Cromme, Essen                               | Vorsitzender, ehem. Vorsitzender des Vorstands der ThyssenKrupp AG                                                                                                                                 |
| Bertin Eichler, Frankfurt/Main                          | stellv. Vorsitzender, Geschäftsführendes Vorstandsmitglied der IG Metall                                                                                                                           |
| Theo Frielinghaus, Ahlen<br>(bis 31.03.2010)            | Maschinenbautechniker, Vorsitzender des Betriebsrats der Polysius AG                                                                                                                               |
| Markus Grolms, Bochum<br>(seit 14.10.2009)              | Gewerkschaftssekretär im Zweigbüro Düsseldorf der IG Metall                                                                                                                                        |
| Susanne Herberger, Dresden                              | Ingenieur (FH) für Informatik, Vorsitzende des Gesamtbetriebsrats der ThyssenKrupp Aufzüge GmbH und Vorsitzende der Betriebsrätearbeitsgemeinschaft ThyssenKrupp Elevator Technology               |
| Prof. Jürgen Hubbert, Sindelfingen<br>(bis 21.01.2010)  | ehem. Mitglied des Vorstands der DaimlerChrysler AG                                                                                                                                                |
| Bernd Kalwa, Krefeld                                    | Dreher, Vorsitzender des Gesamtbetriebsrats der ThyssenKrupp Nirosta GmbH und Vorsitzender der Betriebsrätearbeitsgemeinschaft ThyssenKrupp Stainless Global                                       |
| Prof. Dr. Hans-Peter Keitel, Essen<br>(seit 21.01.2010) | Präsident des Bundesverbandes der Deutschen Industrie e.V.                                                                                                                                         |
| Ernst-August Kiel, Blumenthal<br>(seit 12.04.2010)      | Schlosser, Vorsitzender des Betriebsrats der Howaldtswerke-Deutsche Werft GmbH und Vorsitzender der Betriebsrätearbeitsgemeinschaft ThyssenKrupp Marine Systems                                    |
| Dr. Martin Kohlhaussen, Bad Homburg<br>(bis 21.01.2010) | ehem. Vorsitzender des Aufsichtsrats der Commerzbank AG                                                                                                                                            |
| Dr. Heinz Kriwet, Düsseldorf<br>(bis 21.01.2010)        | ehem. Vorsitzender des Vorstands der Thyssen AG                                                                                                                                                    |
| Prof. Dr. Ulrich Lehner, Düsseldorf                     | Mitglied des Gesellschafterausschusses der Henkel AG & Co. KGaA                                                                                                                                    |
| Prof. Dr. Bernhard Pellens, Bochum                      | Professor für Betriebswirtschaft und Internationale Unternehmensrechnung an der Ruhr-Universität Bochum                                                                                            |
| Peter Remmler, Wolfsburg                                | Kaufmann im Groß- und Außenhandel, Vorsitzender des Betriebsrats der ThyssenKrupp Schulte GmbH (Braunschweig) und Vorsitzender der Betriebsrätearbeitsgemeinschaft ThyssenKrupp Materials Services |



|                                                                        |                                                                                                                                                                                                                                           |
|------------------------------------------------------------------------|-------------------------------------------------------------------------------------------------------------------------------------------------------------------------------------------------------------------------------------------|
| Dr. Kersten v. Schenck, Bad Homburg                                    | Rechtsanwalt und Notar                                                                                                                                                                                                                    |
| Peter Scherrer, Brüssel                                                | Generalsekretär des Europäischen Metallgewerkschaftsbundes                                                                                                                                                                                |
| Thomas Schlenz, Duisburg                                               | Schichtmeister, Vorsitzender des Konzernbetriebsrats<br>der ThyssenKrupp AG                                                                                                                                                               |
| Dr. Henning Schulte-Noelle, München                                    | Vorsitzender des Aufsichtsrats der Allianz SE                                                                                                                                                                                             |
| Wilhelm Segerath, Duisburg                                             | Karosserie- und Fahrzeugbauer, Vorsitzender<br>des Gesamtbetriebsrats der ThyssenKrupp Steel Europe AG und<br>Vorsitzender der Betriebsrätearbeitsgemeinschaft<br>ThyssenKrupp Steel Europe                                               |
| Peer Steinbrück, Bonn<br>(seit 21.01.2010)                             | Mitglied des Deutschen Bundestages<br>Bundesminister a.D.                                                                                                                                                                                 |
| Christian Streiff, Paris                                               | ehem. Präsident der PSA Peugeot Citroën S.A.                                                                                                                                                                                              |
| Jürgen R. Thumann, Düsseldorf                                          | Vorsitzender des Beirats der Heitkamp & Thumann Group                                                                                                                                                                                     |
| Prof. Dr. Beatrice Weder di Mauro, Frankfurt/Main<br>(seit 21.01.2010) | Professorin für Volkswirtschaftslehre, Wirtschaftspolitik &<br>Internationale Makroökonomik an der Johannes-Gutenberg-Universität<br>Mainz und Mitglied im Sachverständigenrat zur Begutachtung<br>der gesamtwirtschaftlichen Entwicklung |
| Klaus Wiercimok, Düsseldorf                                            | Rechtsanwalt, Leiter des Departments Materials Services<br>im Corporate Center Legal & Compliance der ThyssenKrupp AG                                                                                                                     |

## Ausschüsse des Aufsichtsrats

|                                                                 |                                                                                                                                                                    |
|-----------------------------------------------------------------|--------------------------------------------------------------------------------------------------------------------------------------------------------------------|
| Präsidium                                                       | Dr. Gerhard Cromme (Vorsitzender), Bertin Eichler,<br>Thomas Schlenz, Dr. Henning Schulte-Noelle                                                                   |
| Vermittlungsausschuss gemäß<br>§ 27 Abs. 3 Mitbestimmungsgesetz | Dr. Gerhard Cromme (Vorsitzender), Bertin Eichler,<br>Thomas Schlenz, Dr. Henning Schulte-Noelle                                                                   |
| Personalausschuss                                               | Dr. Gerhard Cromme (Vorsitzender), Bertin Eichler,<br>Thomas Schlenz, Dr. Henning Schulte-Noelle                                                                   |
| Prüfungsausschuss                                               | Prof. Dr. Bernhard Pellens (Vorsitzender), Dr. Gerhard Cromme,<br>Bertin Eichler, Prof. Dr. Ulrich Lehner, Thomas Schlenz,<br>Wilhelm Segerath                     |
| Strategie-, Finanz- und<br>Investitionsausschuss                | Dr. Gerhard Cromme (Vorsitzender), Bertin Eichler, Markus Grolms,<br>Susanne Herberger, Bernd Kalwa, Dr. Kersten v. Schenck,<br>Peer Steinbrück, Jürgen R. Thumann |
| Nominierungsausschuss                                           | Dr. Gerhard Cromme (Vorsitzender), Prof. Dr. Bernhard Pellens,<br>Dr. Henning Schulte-Noelle, Prof. Dr. Beatrice Weder di Mauro                                    |



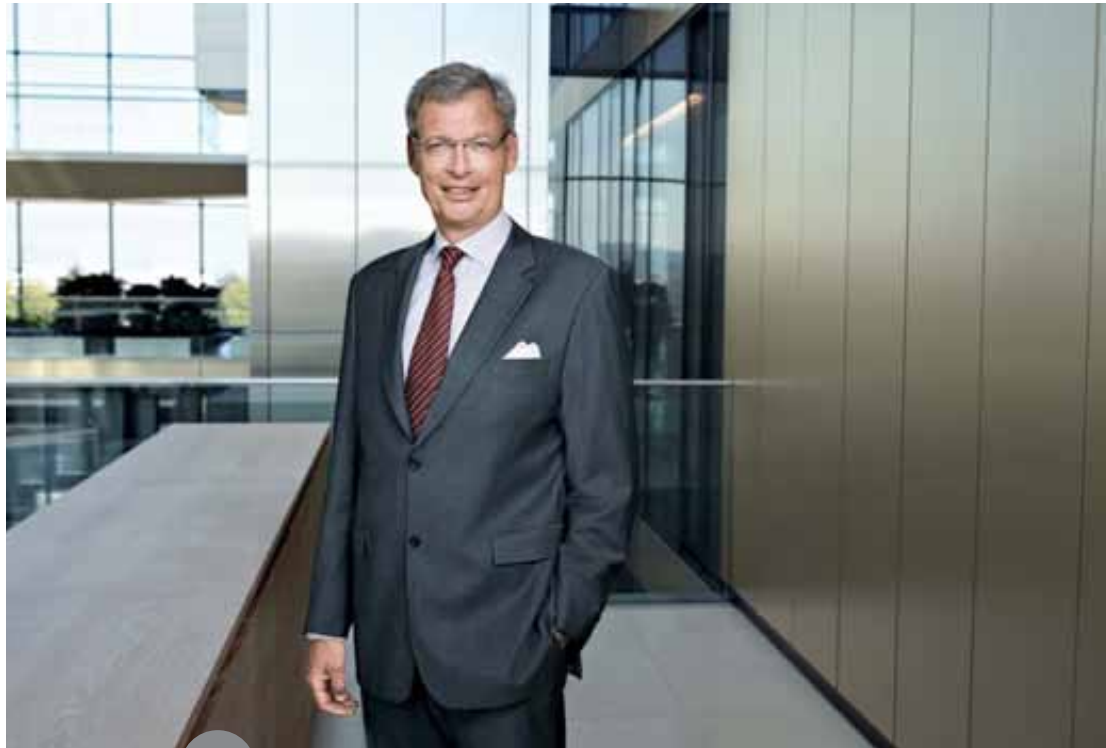

Abb. 03

.....  
Dr. Gerhard Cromme, Vorsitzender des Aufsichtsrats,  
aufgenommen am 11.10.2010 im ThyssenKrupp Quartier, Essen.



# Bericht des Aufsichtsrats

Auch im Geschäftsjahr 2009/2010 hat der Aufsichtsrat eng mit dem Vorstand zusammengearbeitet. Das Jahr war angesichts der noch immer spürbaren Auswirkungen der weltweiten Wirtschafts- und Finanzkrise, der Umsetzung der neuen Konzernorganisation sowie der großen Investitionsprojekte in Brasilien und den USA mit besonderen Herausforderungen für den Konzern verbunden. Im nachfolgenden Bericht informiert der Aufsichtsrat über die Schwerpunkte seiner Tätigkeit in diesem komplexen Umfeld.

## Überwachung und Beratung im kontinuierlichen Dialog mit dem Vorstand

Der Aufsichtsrat hat auch im Geschäftsjahr 2009/2010 die ihm nach Gesetz und Satzung obliegenden Kontroll- und Beratungsaufgaben mit großer Sorgfalt wahrgenommen. In den Sitzungen des Aufsichtsrats und der Ausschüsse standen wiederum zahlreiche Sachthemen sowie zustimmungspflichtige Geschäftsvorfälle zur Diskussion und Entscheidung an.

Der Aufsichtsrat hat den Vorstand bei der Leitung des Unternehmens regelmäßig beraten, die Geschäftsführung kontinuierlich begleitet und überwacht und sich von deren Recht- und Ordnungsmäßigkeit überzeugt. Der Vorstand hat uns frühzeitig in alle für das Unternehmen bedeutsamen Entscheidungen intensiv eingebunden. Hierzu hat er uns regelmäßig, zeitnah und umfassend in schriftlicher und mündlicher Form über alle für das Unternehmen wesentlichen Aspekte unterrichtet, vor allem über die Entwicklung der Geschäfts- und Finanzlage, die Beschäftigungssituation, über geplante und laufende Investitionen sowie über grundsätzliche Fragen der Unternehmensplanung und -strategie. Vor dem Hintergrund der weiterhin spürbaren Auswirkungen der weltweiten Finanz- und Wirtschaftskrise galt unser besonderes Augenmerk auch im Berichtsjahr regelmäßig der aktuellen Ertragssituation und Finanzlage einschließlich der Risikolage und des Risikomanagements. Ferner haben wir die Umsetzung der neuen Konzernorganisation begleitet und die Entwicklung der beiden großen Investitionsprojekte in Brasilien und den USA erörtert. Die strategische Ausrichtung des Unternehmens hat der Vorstand mit uns abgestimmt. Soweit es zu Abweichungen des Geschäftsverlaufs von den aufgestellten Planungen und Zielen kam, haben wir ausführliche Erläuterungen in schriftlicher oder mündlicher Form erhalten, so dass wir mit dem Vorstand über die Gründe für die Abweichungen und zielführende Maßnahmen diskutieren konnten.

Auf Basis der Vorstandsberichte haben wir alle für das Unternehmen bedeutenden Geschäftsvorgänge in den Ausschüssen und im Plenum intensiv erörtert. Nach eingehender Prüfung und Beratung hat der Aufsichtsrat zu den Berichten und den Beschlussvorschlägen des Vorstands, soweit dies nach Gesetz und Satzung erforderlich war, sein Votum abgegeben. In einzelnen Fällen haben wir außerhalb von Sitzungen Beschlüsse im schriftlichen Verfahren gefasst.

**1**

Der Aufsichtsrat hat alle bedeutenden Vorgänge in Ausschüssen und Plenum intensiv beraten.



Auch in der Zeit zwischen den Sitzungen des Plenums und der Ausschüsse haben insbesondere der Aufsichtsratsvorsitzende und der Vorsitzende des Prüfungsausschusses regelmäßig in Kontakt mit dem Vorstand gestanden. Über wesentliche Entwicklungen und Entscheidungen wurden wir informiert und haben den Vorstand beratend unterstützt. Vor den Aufsichtsratssitzungen haben die Anteilseigner- und die Arbeitnehmervertreter jeweils getrennt wesentliche Themen der Tagesordnung beraten.

Im Geschäftsjahr 2009/2010 ist der Aufsichtsrat zu vier turnusmäßigen Sitzungen zusammengetreten. Da mit Ablauf der Hauptversammlung am 21. Januar 2010 die Mandate der bis dahin gewählten Anteilseignervertreter ausgelaufen waren, fand darüber hinaus unmittelbar nach der Hauptversammlung eine konstituierende Sitzung des Aufsichtsrats mit den neu gewählten Anteilseignervertretern statt. Die Präsenz bei den Aufsichtsratssitzungen lag durchschnittlich bei 94 %. Kein Aufsichtsratsmitglied hat an weniger als der Hälfte der Sitzungen teilgenommen. Die Ausschüsse tagten bis auf eine Sitzung jeweils in vollständiger Besetzung.

Interessenkonflikte von Vorstands- und Aufsichtsratsmitgliedern, die dem Aufsichtsrat gegenüber unverzüglich offenzulegen sind und über die die Hauptversammlung zu informieren ist, sind auch im abgelaufenen Geschäftsjahr nicht aufgetreten.

#### Effiziente Arbeit in den Ausschüssen des Aufsichtsrats

Zur Wahrnehmung seiner Aufgaben hat der Aufsichtsrat insgesamt sechs Ausschüsse eingerichtet, die die Arbeit im Plenum effektiv unterstützen. Die Ausschüsse bereiten die Beschlüsse des Aufsichtsrats sowie die Themen vor, die im Plenum zu behandeln sind. In Einzelfällen haben wir im gesetzlichen Rahmen Entscheidungsbefugnisse des Aufsichtsrats auf Ausschüsse übertragen. Diese Aufteilung hat sich in der Praxis bewährt. Außer im Prüfungsausschuss führt der Aufsichtsratsvorsitzende in allen Ausschüssen den Vorsitz. Über die Inhalte und Ergebnisse der Ausschuss-Sitzungen wurde der Aufsichtsrat jeweils zeitnah unterrichtet, so dass er über eine umfassende Informationsbasis für seine Beratungen verfügte. Die Zusammensetzung der einzelnen Ausschüsse kann der Aufstellung auf Seite 49 entnommen werden.

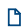

Einzelheiten: Seite 49

#### Präsidium

Das Präsidium hielt im Berichtsjahr fünf Sitzungen ab. Auch außerhalb dieser Sitzungen habe ich als Vorsitzender mit den Präsidiumsmitgliedern in engem Kontakt gestanden, um Projekte von besonderer Bedeutung für den Konzern zu besprechen. Schwerpunkte der Beratungen im Präsidium waren neben der Vorbereitung der Plenumsitzungen die Ergebnissituation und Finanzlage des Konzerns, die Umsetzung der neuen Konzernorganisation, die Fortschrittsberichte zu den beiden großen Investitionsprojekten, die Änderungen im Deutschen Corporate Governance Kodex, die Inhalte der Entsprechenserklärung sowie die Vorbereitung der Effizienzprüfung des Aufsichtsrats.

#### Vermittlungsausschuss

Der Vermittlungsausschuss gemäß § 27 Abs. 3 MitbestG musste auch im Geschäftsjahr 2009/2010 nicht einberufen werden.

#### Personalausschuss

Der Personalausschuss, der die Personalentscheidungen des Aufsichtsrats vorbereitet und für sonstige Vorstandsangelegenheiten zuständig ist, trat ebenfalls fünfmal zusammen. Er befasste sich in mehreren Sitzungen mit der Ausgestaltung des Vorstandsvergütungssystems sowie mit der Festsetzung der jeweiligen Vergütung für die Vorstandsmitglieder und unterbreitete dem Plenum entsprechende Beschlussvorschläge. Einzelheiten zum geänderten Vergütungssystem sind im Rahmen des Corporate-Governance-Berichts im Vergütungsbericht auf den Seiten 67–70 dargelegt. Wesentliche Beratungsthemen

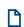

Einzelheiten: Seiten 67–70



waren ferner die Regelung der Nachfolge von Herrn Dr. Ekkehard D. Schulz und die Bestellung von Herrn Dr. Heinrich Hiesinger zum neuen Vorstandsvorsitzenden, die Bestellung von Herrn Dr. Jürgen Claassen zum Vorstandsmitglied sowie die damit einhergehenden Änderungen der Geschäftsverteilung des Vorstands. Der Personalausschuss hat darüber hinaus beschlossen, bei der Neubestellung zukünftiger Vorstandsmitglieder auch das Kriterium der Vielfalt einzubeziehen und dabei insbesondere eine angemessene Berücksichtigung von Frauen anzustreben.

Der Personalausschuss hat sich ferner mit etwaigen Schadensersatzansprüchen gegenüber Vorstandsmitgliedern im Zusammenhang mit dem Stahlwerksprojekt Brasilien befasst. Er erteilte des Weiteren seine Zustimmung zur Übernahme von Mandaten durch einzelne Vorstandsmitglieder bei anderen Unternehmen sowie zur Beauftragung der Rechtsanwaltssozietät Clifford Chance, für die das Aufsichtsratsmitglied Herr Dr. Kersten v. Schenck als Of Counsel tätig ist.

#### **i**

Der Prüfungsausschuss hat die Qualifikation des Abschlussprüfers überwacht.

### **Prüfungsausschuss**

Der Prüfungsausschuss hielt im Berichtsjahr fünf Sitzungen ab. An den Sitzungen nahmen regelmäßig die Abschlussprüfer sowie der Vorsitzende des Vorstands und der Finanzvorstand teil. Der Ausschuss befasste sich schwerpunktmäßig mit dem Jahres- und dem Konzernabschluss, der Überwachung des Rechnungslegungsprozesses, der Wirksamkeit des internen Kontrollsystems, des Risikomanagementsystems und des internen Revisionssystems sowie mit der Abschlussprüfung, insbesondere mit der Unabhängigkeit des Abschlussprüfers und den vom Abschlussprüfer zusätzlich erbrachten Leistungen. Ferner wurden die Zwischenberichte vor ihrer Veröffentlichung ausführlich erörtert und gebilligt. In seiner Sitzung im November 2009 wurde der Ausschuss umfassend über die aktuellen Compliance-Aktivitäten des Konzerns informiert. Der Abschlussprüfer berichtete stets ausführlich über alle für die Aufgaben des Aufsichtsrats wesentlichen Feststellungen und Vorkommnisse, die sich bei der Durchführung der Abschlussprüfung bzw. der prüferischen Durchsicht der Zwischenberichte ergeben haben. Der Prüfungsausschuss hat sich außerdem mit der Erteilung des Prüfungsauftrags an den Abschlussprüfer befasst und gemeinsam mit dem Abschlussprüfer folgende Fokusthemen festgelegt und bearbeitet: prozessbegleitende Wirtschaftlichkeitsanalyse der Projekte der Business Area Steel Americas in Brasilien und den USA sowie Bewertung der Vermögenswerte in der Business Area Stainless Global. Ferner wurde dem Plenum ein Vorschlag zur Wahl des Abschlussprüfers für das Geschäftsjahr 2009/2010 unterbreitet. Der Prüfungsausschuss beauftragte den Abschlussprüfer nach dessen Wahl durch die Hauptversammlung mit der Prüfung des Jahres- und des Konzernabschlusses der ThyssenKrupp AG sowie mit der prüferischen Durchsicht der Zwischenberichte. Es wurde die Vergütung für den Abschlussprüfer beschlossen. Der Abschlussprüfer hatte erklärt, dass keine Umstände bestehen, die Anlass geben, seine Befangenheit anzunehmen, und ferner über die Leistungen berichtet, die er zusätzlich zu den Abschlussprüferleistungen erbracht hat. Der Prüfungsausschuss hat die erforderliche Unabhängigkeitserklärung des Abschlussprüfers eingeholt und die Qualifikation des Prüfers überwacht.

Der Prüfungsausschuss ließ sich auch im abgelaufenen Geschäftsjahr regelmäßig über den Stand der großen Investitionsprojekte in Brasilien und den USA informieren und hat diese Projekte eingehend erörtert. Er hat sich mit den Ergebnissen der internen Prüfungstätigkeit der Konzernrevision und dem Prüfungsplan für das folgende Jahr sowie mit regelmäßigen Berichten über rechtliche Risiken auseinandergesetzt und sich von der Rechtmäßigkeit der Unternehmensführung überzeugt. Wichtige Themen waren darüber hinaus die Risikosituation und Liquiditätsausstattung sowie Bewertungsfragen.

### **Strategie-, Finanz- und Investitionsausschuss**

Der Strategie-, Finanz- und Investitionsausschuss befasste sich im Geschäftsjahr 2009/2010 in zwei Sitzungen mit der strategischen Ausrichtung des Konzerns und der Business Areas, mit den Wettbewerbspositionen der einzelnen Business Areas sowie mit der Umsetzung der neuen Konzernorgani-



sation. Weitere Beratungsschwerpunkte waren das ThyssenKrupp PLuS-Programm zur Ergebnis- und Liquiditätssicherung sowie die Auswirkungen der gestiegenen Energie- und Rohstoffpreise, insbesondere für den Stahlbereich. Ferner wurden die Investitionspolitik des Konzerns unter Berücksichtigung der aktuellen Rating-Situation sowie Akquisitions- und Desinvestitionsprojekte in den Business Areas erörtert. Schwerpunktthemen waren darüber hinaus die Unternehmens- und Investitionsplanung sowie die Vorbereitung entsprechender Beschlüsse des Aufsichtsrats. Auch dieser Ausschuss hat die großen Investitionsprojekte in Brasilien und den USA sowie die Neuausrichtung der Business Area Marine Systems im Zuge der angestrebten strategischen Partnerschaft mit der Abu Dhabi MAR-Gruppe begleitet.

#### Nominierungsausschuss

Der Nominierungsausschuss trat im Berichtsjahr zweimal zusammen. Er bereitete die Wahlvorschläge an die Hauptversammlung am 21. Januar 2010 für die turnusmäßige Neuwahl der Anteilseignervertreter im Aufsichtsrat vor und unterbreitete dem Plenum hierzu einen Kandidatenvorschlag. Dieser enthielt auch den Vorschlag, Herrn Dr. Gerhard Cromme im Fall seiner Wahl durch die Hauptversammlung zum Vorsitzenden des Aufsichtsrats zu wählen. Ferner hat sich der Ausschuss im September 2010 intensiv mit der Erfüllung der neuen Vorgaben des Deutschen Corporate Governance Kodex befasst und beschlossen, bei künftigen Wahlvorschlägen für die Anteilseignervertreter im Aufsichtsrat auf Vielfalt zu achten und dabei insbesondere eine angemessene Berücksichtigung von Frauen anzustreben.

#### Sitzungen und Beschlussfassungen des Aufsichtsrats

Wichtige Schwerpunkte unserer Arbeit und Gegenstand regelmäßiger Erörterungen im Plenum waren die weiterhin spürbaren Auswirkungen der weltweiten Wirtschafts- und Finanzkrise auf ThyssenKrupp und die vom Vorstand ergriffenen Maßnahmen, die Umsatz-, Ergebnis- und Beschäftigungsentwicklung des Konzerns und der Business Areas sowie alle wesentlichen Beteiligungs- und Desinvestitionsprojekte. In mehreren Sitzungen wurden zudem die Finanz- und Rating-Situation des Konzerns sowie die Maßnahmen des Vorstands zur Sicherung der Liquidität und des Refinanzierungsbedarfs thematisiert.

Im Oktober 2009 hat der Aufsichtsrat auf Basis ausführlicher Unterlagen der Veräußerung der ThyssenKrupp Industrieservice GmbH an die WISAG im schriftlichen Verfahren zugestimmt. Die Grundzüge der Veräußerung waren vorab in der Sitzung am 04. September 2009 erläutert worden.

In der Aufsichtsratssitzung am 26. November 2009 haben wir uns schwerpunktmäßig mit dem Jahres- und dem Konzernabschluss zum 30. September 2009 sowie mit dem Gewinnverwendungsvorschlag des Vorstands befasst. Wir haben auch das Risikomanagement bei ThyssenKrupp mit dem Vorstand erörtert und uns von dessen Leistungsfähigkeit überzeugt. Auf der Grundlage eines ausführlichen Berichts des Vorstands haben wir ferner die Unternehmensplanung für das Geschäftsjahr 2009/2010 beraten und dabei auch die weiteren Auswirkungen der Wirtschafts- und Finanzkrise diskutiert. Breiten Raum nahm ein Bericht des Vorstands über eine strategische Partnerschaft mit der Abu Dhabi MAR-Gruppe in der Business Area Marine Systems ein. Der Vorstand hat uns darüber hinaus über die Umsetzung des ThyssenKrupp PLuS-Programms berichtet, das durch ergebnissichernde Maßnahmen und die Verringerung des Net Working Capital zu einer spürbaren Verbesserung der Ergebnis- und Finanzlage geführt hat. Der Aufsichtsrat hat in dieser Sitzung auch die Tagesordnung für die Hauptversammlung der ThyssenKrupp AG am 21. Januar 2010 mit den Beschlussvorschlägen verabschiedet und auf Vorschlag des Nominierungsausschusses die Kandidaten zur Neuwahl der Anteilseignervertreter aufgestellt. Überdies hat der Aufsichtsrat dem Verkauf der nordamerikanischen Safway Gruppe an Odyssey Investment Partners, LLC zugestimmt. In Abwesenheit des Vorstands hat der Aufsichtsrat intensiv über die Modifikation des Vorstandsvergütungssystems beraten, um den neuen Anforderungen durch das Gesetz zur Angemessenheit der Vorstandsvergütung (VorstAG) Rechnung zu tragen. Vorbehaltlich einer

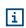

Der Aufsichtsrat hat wiederholt über die strategische Partnerschaft mit Abu Dhabi MAR beraten.



endgültigen Entscheidung in der Mai-Sitzung 2010 wurden einige Eckpunkte des Systems festgelegt. Nach vorheriger Vorbereitung im Präsidium hat der Aufsichtsrat die Ergebnisse seiner Effizienzprüfung erörtert und den Vorstand gebeten, die abgestimmten Maßnahmen zur weiteren Optimierung der Aufsichtsratsarbeit umzusetzen.

In der Aufsichtsratssitzung unmittelbar vor der Hauptversammlung am 21. Januar 2010 hat uns der Vorstand einen Bericht zur aktuellen Lage des Konzerns erstattet. Gegenstand der Sitzung war ferner die Investitionspolitik des Konzerns vor dem Hintergrund der aktuellen Finanz- und Rating-Situation. In diesem Zusammenhang haben wir uns auf Basis einer ausführlichen Unterlage auch mit den Investitionsbudgets für die Investitionsprojekte in Brasilien und den USA befasst und den Vorstand schließlich gebeten, zu den Großprojekten in der Mai-Sitzung eine Abschlussrechnung vorzulegen. Vor dem Hintergrund des Ausscheidens von Herrn Dr. Middelmann aus dem Vorstand der ThyssenKrupp AG mit Ablauf der Hauptversammlung haben wir einen neuen Geschäftsverteilungsplan für den Vorstand verabschiedet. Die Sitzung wurde auch zur Vorbereitung der anschließenden Hauptversammlung genutzt.

**i**

Prof. Dr. Pellens wurde am 21. Januar 2010 zum Vorsitzenden des Prüfungsausschusses gewählt.

Unmittelbar nach der Hauptversammlung wurden in der konstituierenden Sitzung des Aufsichtsrats Herr Dr. Cromme erneut zum Vorsitzenden des Aufsichtsrats und Herr Prof. Dr. Pellens erstmals zum Vorsitzenden des Prüfungsausschusses gewählt. Herr Bertin Eichler wurde als stellvertretender Vorsitzender des Aufsichtsrats bestätigt. Die Ausschüsse des Aufsichtsrats wurden auf Seiten der Anteilseignervertreter neu besetzt.

Im April 2010 hat der Aufsichtsrat anknüpfend an die Berichterstattung in der Sitzung im November 2009 auf Basis einer umfassenden Unterlage des Vorstands der strategischen Partnerschaft mit der Abu Dhabi MAR-Gruppe in der Business Area Marine Systems im schriftlichen Verfahren zugestimmt. Ferner hat uns der Vorstand im April eine ausführliche Unterlage über die aktuelle Entwicklung auf den Rohstoffmärkten und die Auswirkungen für ThyssenKrupp zugesandt, die auch Gegenstand der Sitzung am 12. Mai 2010 gewesen ist. In dieser Sitzung hat uns der Vorstand neben dem regelmäßigen Bericht zur Lage des Konzerns einen Statusreport zum ThyssenKrupp PLuS-Programm und zur Umsetzung der Neuorganisation gegeben. Ferner haben wir mit dem Vorstand die künftige strategische Ausrichtung und die Entwicklungsperspektiven des Konzerns und der Business Areas erörtert. Der Vorstand hat für diese Sitzung die von uns erbetene Abschlussrechnung zu den Großprojekten in Brasilien und den USA erstellt. Ergänzend hierzu wurde eine Stellungnahme der Rechtsanwaltssozietät Hengeler Müller vorgelegt, die zu dem Ergebnis kommt, dass die Investitionsabrechnung keine Hinweise auf Sorgfaltspflichtverletzungen des Vorstands oder einzelner Vorstandsmitglieder der ThyssenKrupp AG enthält. In Abwesenheit des Vorstands hat der Aufsichtsrat in dieser Sitzung Vorstandsangelegenheiten erörtert und folgende Beschlüsse gefasst: die Bestellung von Herrn Dr. Heinrich Hiesinger zum stellvertretenden Vorstandsvorsitzenden ab dem 01. Oktober 2010 und zum Vorstandsvorsitzenden mit Ablauf der Hauptversammlung am 21. Januar 2011 sowie die Bestellung von Herrn Dr. Jürgen Claassen zum Mitglied des Vorstands mit Ablauf der Hauptversammlung am 21. Januar 2011. Der Aufsichtsrat hat außerdem auf Vorschlag des Personalausschusses den Anstellungsverträgen beider Herren zugestimmt und die Neufassung des Geschäftsverteilungsplans für den Vorstand zum 01. Oktober 2010 und zum 21. Januar 2011 verabschiedet. Nach ausführlicher Beratung wurde die Investitionsplanung des Konzerns für das Geschäftsjahr 2010/2011 gebilligt. Der Vorstand hat uns ferner einen Sachstandsbericht zum neuen ThyssenKrupp Quartier gegeben. Gegenstand unserer Erörterungen war auch die Zusammenarbeit der Howaldtswerke-Deutsche Werft mit Ferrostaal. In Abwesenheit des Vorstands hat der Aufsichtsrat auf Vorschlag des Personalausschusses anknüpfend an die Debatte in der Aufsichtsratsitzung im November 2009 das neue Vergütungssystem für den Vorstand vertiefend beraten und verabschiedet.



Schwerpunkte der Beratungen in der Sitzung am 03. September 2010 waren neben einem Bericht des Vorstands zur Lage des Konzerns detaillierte Berichte über die Entwicklung in den Business Areas. Der Vorstand hat uns auch eine aktuelle Wirtschaftlichkeitsrechnung zu den Großprojekten in Brasilien und den USA vorgelegt. Der Aufsichtsrat hat zur Kenntnis genommen, dass in einer Plausibilitätsrechnung von Ernst & Young die Wirtschaftlichkeit und Werthaltigkeit der beiden Projekte bestätigt worden sind. Dem Verkauf der griechischen Hellenic Shipyards S.A. hat der Aufsichtsrat zugestimmt. Er hat ferner die Corporate Governance bei ThyssenKrupp und insbesondere die durch die Regierungskommission Deutscher Corporate Governance Kodex im Mai 2010 vorgenommenen Kodex-Änderungen erörtert. In diesem Zusammenhang hat er konkrete Ziele für seine künftige Zusammensetzung benannt und beschlossen, auch bei der Besetzung des Vorstands auf Vielfalt zu achten und dabei insbesondere eine angemessene Berücksichtigung von Frauen anzustreben. Der Aufsichtsrat hat ferner turnusgemäß die Festgehälter der Vorstandsmitglieder überprüft und neu festgesetzt.

### Corporate Governance und Entsprechenserklärung

Der Aufsichtsrat hat sich auch im abgelaufenen Geschäftsjahr mit der Weiterentwicklung der Corporate-Governance-Standards auseinandergesetzt. Über die Corporate Governance bei ThyssenKrupp berichtet der Vorstand zugleich auch für den Aufsichtsrat gemäß Ziffer 3.10 des Deutschen Corporate Governance Kodex im Corporate-Governance-Bericht auf den Seiten 58–74. Die Umsetzung des Kodex haben wir im Aufsichtsrat in der Sitzung am 03. September 2010 intensiv diskutiert. Dabei haben wir uns auch ausführlich mit den jüngsten Kodex-Änderungen befasst.

Vorstand und Aufsichtsrat haben zum 01. Oktober 2010 gemeinsam eine aktualisierte Entsprechenserklärung nach § 161 AktG abgegeben, die den Aktionären auf der Website der Gesellschaft dauerhaft zugänglich ist. Die ThyssenKrupp AG entspricht demnach den aktuellen Kodex-Empfehlungen mit einer Ausnahme: Die Empfehlung in Ziffer 5.4.5, wonach ein Vorstandsmitglied insgesamt nicht mehr als drei Aufsichtsratsmandate in konzernexternen börsennotierten Gesellschaften oder in Aufsichtsgremien von Gesellschaften mit vergleichbaren Anforderungen wahrnehmen soll, wird bis zum Ablauf der Hauptversammlung am 21. Januar 2011 nicht uneingeschränkt angewandt. Nähere Informationen hierzu können Seite 61 entnommen werden. Die Anregungen des Kodex werden ohne Ausnahme befolgt.

### Prüfung von Jahres- und Konzernabschluss

Die KPMG AG Wirtschaftsprüfungsgesellschaft, Berlin, hat den vom Vorstand nach den Regeln des HGB aufgestellten Jahresabschluss für das Geschäftsjahr vom 01. Oktober 2009 bis 30. September 2010 und den Lagebericht der ThyssenKrupp AG geprüft. Den Prüfauftrag hatte der Prüfungsausschuss des Aufsichtsrats entsprechend dem Beschluss der Hauptversammlung am 21. Januar 2010 vergeben. Der Abschlussprüfer erteilte einen uneingeschränkten Bestätigungsvermerk. Der Konzernabschluss der ThyssenKrupp AG für das Geschäftsjahr vom 01. Oktober 2009 bis 30. September 2010 und der Konzernlagebericht wurden gemäß § 315a HGB auf der Grundlage der International Financial Reporting Standards (IFRS), wie sie in der Europäischen Union anzuwenden sind, aufgestellt. Auch diesen Konzernabschluss sowie den Konzernlagebericht hat der Abschlussprüfer mit einem uneingeschränkten Bestätigungsvermerk versehen. Der Abschlussprüfer hat ferner festgestellt, dass der Vorstand ein angemessenes Informations- und Überwachungssystem eingerichtet hat, das in seiner Konzeption und Handhabung geeignet ist, den Fortbestand der Gesellschaft gefährdende Entwicklungen frühzeitig zu erkennen.

Der Prüfungsausschuss hatte für das Berichtsjahr folgende Fokusthemen mit dem Abschlussprüfer festgelegt und bearbeitet: prozessbegleitende Wirtschaftlichkeitsanalyse der Projekte der Business Area Steel Americas in Brasilien und den USA sowie Bewertung der Vermögenswerte in der Business Area

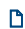

Einzelheiten: Seiten 58–74

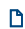

Einzelheiten: Seite 61



**i**

Der Aufsichtsrat hält die vorgeschlagene Dividende für angemessen.

Stainless Global. Die Abschlussunterlagen und Prüfungsberichte wurden allen Aufsichtsratsmitgliedern rechtzeitig zugesandt. Sie wurden in der Prüfungsausschuss-Sitzung am 16. November 2010 sowie in der Sitzung des Aufsichtsrats am 26. November 2010 ausführlich diskutiert. In beiden Sitzungen berichtete der Abschlussprüfer über die wesentlichen Ergebnisse seiner Prüfung. Er stand auch für ergänzende Fragen und Auskünfte zur Verfügung. Der Vorsitzende des Prüfungsausschusses hat uns in der Plenumssitzung einen ausführlichen Bericht über die Prüfung des Jahresabschlusses und des Konzernabschlusses im Prüfungsausschuss erstattet. Nach Prüfung und Diskussion des Jahresabschlusses, des Konzernabschlusses, des Lageberichts und des Konzernlageberichts im Aufsichtsrat haben wir dem Ergebnis der Prüfung durch den Abschlussprüfer zugestimmt und in der Sitzung am 26. November 2010 gemäß der Empfehlung des Prüfungsausschusses den vom Vorstand aufgestellten Jahresabschluss und Konzernabschluss gebilligt. Der Jahresabschluss ist damit festgestellt. Dem vom Vorstand zugeleiteten und erläuterten Gewinnverwendungsvorschlag haben wir uns nach eigener Prüfung sowie unter Berücksichtigung der Ergebnisentwicklung und Finanzlage angeschlossen. Wir halten die vorgeschlagene Dividende für angemessen.

#### Besetzung von Aufsichtsrat und Vorstand

Wie bereits im Geschäftsbericht 2008/2009 erläutert, wurde als Nachfolger von Herrn Markus Bistram, der sein Aufsichtsratsmandat mit Ablauf des 15. September 2009 niedergelegt hat, durch gerichtlichen Beschluss mit Wirkung vom 14. Oktober 2009 Herr Markus Grolms zum Mitglied des Aufsichtsrats bestellt. Mit Ablauf der Hauptversammlung am 21. Januar 2010 sind die Herren Prof. Jürgen Hubbert, Dr. Martin Kohlhausen und Dr. Heinz Kriwet aus dem Aufsichtsrat ausgeschieden. Die Hauptversammlung wählte in Einzelwahl als Vertreter der Anteilseigner Frau Prof. Dr. Beatrice Weder di Mauro sowie die Herren Prof. Dr. Hans-Peter Keitel, Prof. Dr. Ulrich Lehner, Prof. Dr. Bernhard Pellens, Dr. Henning Schulte-Noelle, Christian Streiff und Jürgen R. Thumann zu Mitgliedern des Aufsichtsrats. Die Alfred Krupp von Bohlen und Halbach-Stiftung hat mit Wirkung ab dem Ende der Hauptversammlung am 21. Januar 2010 die Herren Dr. Gerhard Cromme, Dr. Kersten v. Schenck und Peer Steinbrück in den Aufsichtsrat entsandt. Mit Ablauf des 31. März 2010 ist Herr Theo Frielinghaus aus dem Aufsichtsrat ausgeschieden. Als Nachfolger wurde durch gerichtlichen Beschluss mit Wirkung vom 12. April 2010 Herr Ernst-August Kiel zum Mitglied des Aufsichtsrats bestellt.

Der Aufsichtsrat hat allen ausgeschiedenen Aufsichtsratsmitgliedern für die gute Zusammenarbeit und ihren Einsatz für das Unternehmen in den zurückliegenden Jahren gedankt.

Mit Ablauf der Hauptversammlung der ThyssenKrupp AG am 21. Januar 2010 ist Herr Dr. Ulrich Middelmann aus dem Vorstand ausgeschieden. Auch Herrn Dr. Middelmann haben wir für seine langjährige wertvolle Arbeit für den Konzern Dank und Anerkennung ausgesprochen. Herr Dr. Heinrich Hiesinger wurde mit Wirkung vom 01. Oktober 2010 zum stellvertretenden Vorsitzenden des Vorstands und mit Ablauf der Hauptversammlung am 21. Januar 2011 zum Vorsitzenden des Vorstands der ThyssenKrupp AG berufen. Herr Dr. Jürgen Claassen wurde mit Wirkung zum Ablauf der Hauptversammlung der ThyssenKrupp AG am 21. Januar 2011 zum Mitglied des Vorstands bestellt.

Der Aufsichtsrat dankt den Vorständen, allen Mitarbeiterinnen und Mitarbeitern sowie den Arbeitnehmervertretungen aller Konzerngesellschaften für ihr Engagement und die in einem weiterhin schwierigen Umfeld geleistete Arbeit.

Der Aufsichtsrat



Dr. Gerhard Cromme  
Vorsitzender

Essen, 26. November 2010



# Corporate-Governance-Bericht

Corporate Governance steht für eine verantwortungsbewusste und auf langfristige Wertschöpfung ausgerichtete Führung und Kontrolle von Unternehmen. Bei ThyssenKrupp orientieren wir uns am Deutschen Corporate Governance Kodex. Vorstand und Aufsichtsrat sehen sich in der Verpflichtung, durch eine verantwortungsbewusste und langfristig ausgerichtete Unternehmensführung für den Bestand des Unternehmens und eine nachhaltige Steigerung des Unternehmenswertes zu sorgen.

Im nachfolgenden Kapitel berichtet der Vorstand – zugleich auch für den Aufsichtsrat – gemäß Ziffer 3.10 des Deutschen Corporate Governance Kodex über die Corporate Governance bei ThyssenKrupp. Das Kapitel enthält auch die Erklärung zur Unternehmensführung gemäß § 289a HGB und den Vergütungsbericht.

Gute Corporate Governance ist bei ThyssenKrupp ein Anspruch, der sämtliche Bereiche des Unternehmens umfasst. Sie fördert das Vertrauen der Anleger, Finanzmärkte, Geschäftspartner, Mitarbeiter und der breiten Öffentlichkeit in die Leitung und Überwachung des Unternehmens und ist eine wesentliche Grundlage für nachhaltigen Unternehmenserfolg.

## Erklärung zur Unternehmensführung

### Aufgaben- und Verantwortungsteilung zwischen Vorstand und Aufsichtsrat

Vorstand und Aufsichtsrat arbeiten zum Wohle des Unternehmens eng zusammen. Gemeinsames Ziel ist es, für den Bestand des Unternehmens und seine nachhaltige Wertschöpfung zu sorgen. Entsprechend den gesetzlichen Vorgaben für eine deutsche Aktiengesellschaft besteht bei der ThyssenKrupp AG ein duales Führungssystem, das durch eine personelle Trennung zwischen dem Leitungs- und dem Überwachungsorgan gekennzeichnet ist.

### Arbeitsweise des Vorstands

Dem Vorstand der ThyssenKrupp AG, der zurzeit aus sechs Personen besteht, obliegt die eigenverantwortliche Leitung des Konzerns und der Konzernholding. Er nimmt die Leitungsaufgabe als Kollegialorgan wahr. Sie umfasst insbesondere die Festlegung der Unternehmensziele, die strategische Ausrichtung des Konzerns und dessen Steuerung und Überwachung, die Unternehmensplanung und die Konzernfinanzierung.

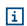

Der Vorstand der ThyssenKrupp AG besteht zurzeit aus sechs Personen.



Die Mitglieder des Vorstands tragen gemeinsam die Verantwortung für die gesamte Geschäftsführung. Sie arbeiten kollegial zusammen und unterrichten sich gegenseitig laufend über wichtige Maßnahmen und Vorgänge in ihren Ressorts. Ungeachtet der Gesamtverantwortung aller Vorstandsmitglieder führen die einzelnen Mitglieder des Vorstands die ihnen zugewiesenen Ressorts im Rahmen der Vorstandsbeschlüsse in eigener Verantwortung. Die nähere Ausgestaltung der Arbeit im Vorstand wird durch eine Geschäftsordnung für den Vorstand bestimmt, in der auch die dem Gesamtvorstand vorbehaltenen Angelegenheiten und sonstige Beschlussmodalitäten näher geregelt sind. Diese kann auf der Website der Gesellschaft eingesehen werden. Die Verteilung der Ressorts auf die einzelnen Mitglieder des Vorstands ergibt sich aus einem Geschäftsverteilungsplan, der Bestandteil der Geschäftsordnung ist.

Der Vorstand stimmt die strategische Ausrichtung des Unternehmens regelmäßig mit dem Aufsichtsrat ab, sorgt für deren Umsetzung und erörtert mit dem Aufsichtsrat in regelmäßigen Abständen den Stand der Umsetzung. Er informiert den Aufsichtsrat regelmäßig, zeitnah und umfassend über alle für das Unternehmen relevanten Fragen der Geschäftsentwicklung, der Finanz- und Ertragslage, der Planung und Zielerreichung, der Risikolage sowie des Risikomanagements. Abweichungen des Geschäftsverlaufs von den aufgestellten Plänen und Zielen werden dabei erläutert und begründet. Die Berichterstattung des Vorstands umfasst auch das Thema Compliance, also die Maßnahmen zur Einhaltung von gesetzlichen Bestimmungen und unternehmensinternen Richtlinien.

Der Vorstand beschließt in Sitzungen, die in der Regel mindestens zweimal im Monat stattfinden und grundsätzlich vom Vorsitzenden des Vorstands geleitet werden. Jedes Mitglied des Vorstands kann die Einberufung einer Sitzung unter Mitteilung des Beratungsgegenstands verlangen; ebenso kann jedes Mitglied verlangen, dass ein Gegenstand in die Tagesordnung einer Sitzung aufgenommen wird. Der Gesamtvorstand entscheidet durch Beschluss mit der einfachen Mehrheit der an der Beschlussfassung teilnehmenden Mitglieder.

Bestimmte Vorstandsentscheidungen von besonderem Gewicht bedürfen der Zustimmung des Aufsichtsrats. Sie sind von der Hauptversammlung beschlossen worden und in der Satzung der Thyssen-Krupp AG festgelegt. So entscheidet der Aufsichtsrat nach § 7 der Satzung beispielsweise über grundsätzliche Änderungen der Konzernorganisation und die jährliche Investitionsplanung des Konzerns sowie deren Finanzierung. Ebenfalls zustimmungspflichtig sind die Begründung und Aufgabe von Beteiligungen an anderen Unternehmen, sofern der Wert der Maßnahme im Einzelfall den Betrag von 25 Mio € übersteigt.

Informationen zur Zusammensetzung des Vorstands und zu den einzelnen Vorstandsmitgliedern können den Seiten 46–47 entnommen werden.

#### Arbeitsweise des Aufsichtsrats

Der Aufsichtsrat bestellt, überwacht und berät den Vorstand und ist in Entscheidungen, die von grundlegender Bedeutung für das Unternehmen sind, unmittelbar eingebunden. Grundlegende Entscheidungen benötigen seine Zustimmung.

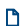



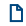

Einzelheiten: Seiten 48–49

Der Aufsichtsrat besteht nach § 9 Absatz 1 der Satzung, § 96 Absatz 1 AktG und § 7 Absatz 1 Satz 1 Nr. 3 MitbestG aus 20 Mitgliedern, von denen zehn von den Aktionären und zehn von den Arbeitnehmern bestellt werden. Sieben Aktionärsvertreter wurden zuletzt in der Hauptversammlung am 21. Januar 2010 gewählt, drei weitere Aktionärsvertreter wurden von der Alfred Krupp von Bohlen und Halbach-Stiftung zum 21. Januar 2010 auf der Grundlage des in § 9 Absatz 2 der Satzung eingeräumten Entsendungsrechts entsandt. Die Wahl der Arbeitnehmervertreter erfolgte am 09. Dezember 2008. Die aktuelle Zusammensetzung des Aufsichtsrats kann den Seiten 48–49 entnommen werden.

Die Amtszeit der Arbeitnehmervertreter endet mit Ablauf der Hauptversammlung im Jahr 2014, die über die Entlastung für das Geschäftsjahr 2012/2013 beschließt. Die Amtszeit der durch die Hauptversammlung gewählten Mitglieder des Aufsichtsrats endet mit Ablauf der Hauptversammlung im Jahr 2015, die über die Entlastung für das Geschäftsjahr 2013/2014 beschließt; zum gleichen Zeitpunkt endet auch die Amtszeit der derzeit durch die Alfred Krupp von Bohlen und Halbach-Stiftung entsandten Mitglieder.

Zur Wahrnehmung seiner Aufgaben hat der Aufsichtsrat insgesamt sechs Ausschüsse eingerichtet, die die Arbeit im Plenum effektiv unterstützen: ein Präsidium, einen Vermittlungsausschuss gem. § 27 Abs. 3 Mitbestimmungsgesetz, einen Personalausschuss, einen Prüfungsausschuss, einen Strategie-, Finanz- und Investitionsausschuss sowie einen Nominierungsausschuss. Die Ausschüsse bereiten die Beschlüsse des Aufsichtsrats sowie die Themen vor, die im Plenum zu behandeln sind. Darüber hinaus beschließt der Personalausschuss anstelle des Gesamtaufichtsrats über bestimmte, in der Geschäftsordnung festgelegte Angelegenheiten, die nach den gesetzlichen Bestimmungen dem Ausschuss zur Beschlussfassung überwiesen werden können. Der Aufsichtsrat hat sich eine Geschäftsordnung gegeben, in der auch die Zuständigkeit der Ausschüsse festgelegt ist. Ergänzend besteht eine Geschäftsordnung für den Prüfungsausschuss. Beide Geschäftsordnungen können auf der Website der Gesellschaft eingesehen werden. Die Zusammensetzung der Ausschüsse finden Sie auf Seite 49.

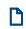

Einzelheiten: Seite 49

Der Aufsichtsrat prüft regelmäßig die Unabhängigkeit seiner Mitglieder. Dafür hat er Grundsätze für die Beurteilung der Unabhängigkeit festgelegt, die sich insbesondere am Deutschen Corporate Governance Kodex orientieren. Nach diesen Grundsätzen ist die Mehrheit der gegenwärtigen Aufsichtsratsmitglieder als unabhängig anzusehen, so dass eine unabhängige Beratung und Überwachung des Vorstands gewährleistet ist. Ebenfalls dem Kodex entsprechend gehört mit Herrn Dr. Cromme nur ein ehemaliges Vorstandsmitglied dem Aufsichtsrat der ThyssenKrupp AG an.

Jedes Aufsichtsratsmitglied legt Interessenkonflikte dem Aufsichtsrat gegenüber unverzüglich offen. Der Aufsichtsrat wird in seinem Bericht an die Hauptversammlung über aufgetretene Interessenkonflikte und deren Behandlung informieren.

#### Entsprechenserklärung gemäß § 161 AktG

Vorstand und Aufsichtsrat einer börsennotierten deutschen Aktiengesellschaft sind gem. § 161 AktG verpflichtet, einmal jährlich zu erklären, ob dem Deutschen Corporate Governance Kodex entsprochen wurde und wird oder welche Empfehlungen des Kodex nicht angewendet wurden oder werden und warum nicht. Auf Basis intensiver Beratungen haben Vorstand und Aufsichtsrat zum 01. Oktober 2010 die Entsprechenserklärung nach § 161 Abs. 1 AktG wie folgt abgegeben:



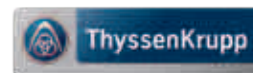

**Erklärung des Vorstands und des Aufsichtsrats  
der ThyssenKrupp AG  
zu den Empfehlungen der  
"Regierungskommission Deutscher Corporate Governance Kodex"  
gem. § 161 AktG**

Die ThyssenKrupp AG entspricht den vom Bundesministerium der Justiz im amtlichen Teil des elektronischen Bundesanzeigers bekannt gemachten Empfehlungen der Regierungskommission Deutscher Corporate Governance Kodex in der Fassung vom 26. Mai 2010 und hat den Empfehlungen des Kodex im Zeitraum vom 1. Oktober 2009 bis zur Aufsichtsratssitzung am 3. September 2010 (Kodexfassung vom 18. Juni 2009) und vom 4. September 2010 bis zum 30. September 2010 (Kodexfassung vom 26. Mai 2010) entsprochen. Die Empfehlung in Ziffer 5.4.5 der Kodex-Fassung vom 26. Mai 2010 wird für den Zeitraum von deren Inkrafttreten am 2. Juli 2010 bis zum Ablauf der Hauptversammlung der ThyssenKrupp AG am 21. Januar 2011 nicht uneingeschränkt angewandt. Ab diesem Zeitpunkt wird die ThyssenKrupp AG wieder sämtlichen Empfehlungen des Kodex entsprechen.

Die Abweichung von der Empfehlung in Ziffer 5.4.5 ergibt sich daraus, dass der Vorsitzende des Vorstands der ThyssenKrupp AG, Herr Dr.-Ing. Ekkehard D. Schulz, konzernexterne Aufsichtsratsmandate in drei börsennotierten Gesellschaften (Bayer AG, MAN SE und RWE AG) und in einer nicht börsennotierten Gesellschaft mit vergleichbaren Anforderungen (AXA Konzern AG) inne hat. Herr Dr.-Ing. Ekkehard D. Schulz wird mit Ablauf der Hauptversammlung der ThyssenKrupp AG am 21. Januar 2011 aus dem Vorstand der ThyssenKrupp AG ausscheiden. Mit Blick auf die langjährige Mitgliedschaft von Herrn Dr. Schulz in den genannten vier Aufsichtsratsgremien und die nur noch limitierte Zeit seiner Vorstandszugehörigkeit halten wir die zeitlich befristete Abweichung von der Kodexempfehlung in Ziffer 5.4.5 für angemessen.

Duisburg/Essen, 1. Oktober 2010

Für den Aufsichtsrat

- Cromme -

Für den Vorstand

- Schulz -

Adresse: ThyssenKrupp AG, ThyssenKrupp Allee 1, 45143 Essen, Postfach, 45063 Essen  
Telefon: 0201 844-0 Telefax: 0201 844-556000 Internet: [www.thyssenkrupp.com](http://www.thyssenkrupp.com)

Ehrenvorsitzende des Aufsichtsrats: Prof. Dr. h.c. mult. Berthold Beitz, Prof. Dr. Günter Vogelsang Vorsitzender des Aufsichtsrats: Dr. Gerhard Cromme  
Vorstand: Dr.-Ing. Ekkehard D. Schulz, Vorsitzender; Dr.-Ing. Heinrich Hesinger, stellv. Vorsitzender; Dr. Olaf Berlien, Edwin Eichler, Dr. Alan Hippel, Ralph Labonte  
Sitz der Gesellschaft: Duisburg und Essen Registergericht: Duisburg HR B 9097, Essen HR B 15364

Darüber hinaus werden alle Anregungen des Deutschen Corporate Governance Kodex erfüllt. Umfangreiche Informationen zum Thema können auch über unsere Website abgerufen werden. Dort sind auch die aktuelle Entsprechenserklärung sowie die Entsprechenserklärungen der Vorjahre zugänglich.



## Wesentliche Unternehmensführungspraktiken

### Compliance als wesentliche Leitungsaufgabe des Vorstands

Compliance als Maßnahmen zur Einhaltung von Recht, Gesetz und unternehmensinternen Richtlinien sowie deren Beachtung durch die Konzernunternehmen ist bei ThyssenKrupp eine wesentliche Leitungs- und Überwachungsaufgabe. Bereits unmittelbar nach der Fusion der Vorgängerkonzerne Thyssen und Krupp im Jahr 1999 wurde ein Compliance-Programm eingeführt. Seitdem wird es regelmäßig überprüft und weiterentwickelt, zuletzt im Zuge der Neuorganisation des Konzerns im Oktober 2009. Der Schwerpunkt der konzernweiten Compliance-Aktivitäten liegt in den Bereichen Kartellrecht und Korruptionsbekämpfung. Mit dem Compliance-Programm haben wir weitreichende Maßnahmen ergriffen, damit die Korruptions- und Kartellvorschriften sowie die darauf beruhenden Konzernrichtlinien eingehalten werden.

Der Vorstand der ThyssenKrupp AG hat seine ablehnende Haltung zu Kartell- und Korruptionsverstößen im sogenannten ThyssenKrupp Compliance-Commitment unmissverständlich zum Ausdruck gebracht. Kartellverstöße oder Verstöße gegen die Vorschriften zur Korruptionsbekämpfung werden in keiner Weise geduldet und führen zu Sanktionen gegen die betroffenen Mitarbeiter. Jeder Mitarbeiter ist aufgefordert, in seinem Verantwortungsbereich aktiv an der Umsetzung des Compliance-Programms mitzuwirken. Das Compliance-Commitment wird durch verschiedene Konzernrichtlinien und Informationspublikationen ergänzt; dort werden die zu Grunde liegenden gesetzlichen Bestimmungen näher erläutert und konkretisiert.

Für die Weiterentwicklung, Steuerung und Umsetzung des Programms ist eine Compliance-Organisation eingerichtet. Hauptamtlich tätige Compliance-Officers informieren beispielsweise die Mitarbeiter in regelmäßigen Schulungen über die maßgeblichen gesetzlichen Bestimmungen und internen Richtlinien. Sie stehen auch als Ansprechpartner für Einzelfragen zur Verfügung. Wesentliche Aufgaben 2009/2010 waren die Umsetzung organisatorischer und personeller Veränderungen im Compliance-Bereich als Folge der Neuorganisation des Konzerns, Durchführung und Begleitung von Compliance Audits, Ermittlung und Prüfung der Sach- und Rechtslage zu eingegangenen Hinweisen, Überarbeitung der Schulungskonzepte sowie Fortführung der Schulungsmaßnahmen und des E-Learning-Programms zu Kernthemen der Compliance. Weltweit wurden im Berichtsjahr mehr als 2.400 Mitarbeiter zum Kartell- und Antikorruptionsrecht geschult. Ein besonderer Schwerpunkt lag auf Schulungen in Ländern mit möglicherweise erhöhten Compliance-Risiken. Die Präsenzs Schulungen werden durch ein konzernweites interaktives E-Learning-Programm ergänzt, an dem bisher ca. 25.000 (Korruptionsbekämpfung) bzw. 21.000 (Kartellrecht) Mitarbeiter teilgenommen haben. Als weiteres ergänzendes Compliance-Element hat ThyssenKrupp eine sogenannte Whistleblower-Hotline eingeführt. Mit deren Betrieb haben wir eine externe Rechtsanwaltssozietät beauftragt. Die Whistleblower-Hotline steht Mitarbeitern des Konzerns wie auch Dritten zur Verfügung, um Hinweise auf mögliche Compliance-Verstöße in Konzernunternehmen zu melden. Auch hier stehen die Bereiche Kartellrecht und Korruption im Zentrum. Die Hotline ist grundsätzlich weltweit erreichbar und kostenfrei.

Weitere Maßnahmen betreffen z.B. das Kapitalmarktrecht und die Einhaltung der entsprechenden Konzernrichtlinie. Die gesetzliche Regelung zum Verbot von Insidergeschäften wird durch eine Insiderrichtlinie ergänzt, die den Handel mit Wertpapieren des Unternehmens für Organmitglieder und Mitarbeiter regelt. Ferner wird über die Insiderrichtlinie die erforderliche Transparenz von Insiderinformationen sichergestellt. So besteht seit Jahren die Konzern-Clearingstelle „Ad-hoc-Publizität“, in der Vertreter verschiedener Bereiche in Frage kommende Sachverhalte auf ihre Ad-hoc-Relevanz prüfen, um den gesetzeskonformen Umgang mit möglichen Insiderinformationen zu gewährleisten. Personen, für die der Zugang zu Insiderinformationen unerlässlich ist, um ihre Aufgaben bei der ThyssenKrupp AG wahrnehmen zu können, werden in ein Insiderverzeichnis aufgenommen.

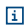

Am E-Learning-Programm zur Compliance haben bisher rund 46.000 Mitarbeiter teilgenommen.



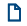

Einzelheiten: Seiten 157–162

### Code of Conduct als Verhaltenskodex für unsere Mitarbeiter

Die Kompetenz und die Leistungsbereitschaft der Mitarbeiter sind entscheidend für die Nachhaltigkeit des Konzernerfolgs. Deshalb fühlen wir uns besonders verpflichtet, ein positives Arbeitsumfeld, ein breites Angebot an Weiterbildungs- und Entwicklungsmaßnahmen sowie ein leistungsorientiertes Vergütungssystem zu schaffen, damit die Mitarbeiter ihre Fähigkeiten bestmöglich einsetzen können. ThyssenKrupp praktiziert eine Kultur, die auf Wertschätzung aller basiert, unabhängig von Geschlecht, Nationalität, ethnischer Herkunft, Religion, Behinderung oder Alter. Diese Grundsätze gehören seit Jahrzehnten zur Unternehmenskultur und wurden 2007 im konzernweit gültigen „Code of Conduct“ festgehalten. Nähere Informationen zum Arbeitsumfeld bei ThyssenKrupp können Sie den Seiten 157–162 entnehmen.

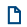

Einzelheiten: Seiten 152–156

### Nachhaltigkeit und Verantwortung

ThyssenKrupp bekennt sich zum Prinzip der Nachhaltigkeit und der Gerechtigkeit zwischen den Generationen. Wir berücksichtigen die Bedürfnisse der gegenwärtigen Generationen und sind uns gleichzeitig der Verantwortung gegenüber den künftigen Generationen bewusst. Vor diesem Hintergrund ist der Schutz der Menschen und der Natur besonders wichtig; Klimaschutz und Ressourcenschonung sind wichtige Leitlinien unseres Handelns. Weitere Informationen dazu finden Sie auf den Seiten 152–156.

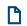

Einzelheiten: Seiten 144–145

### Gesellschaftliches Engagement

Um die positive Entwicklung der Regionen, in denen der Konzern tätig ist, zu fördern, unterstützen wir regelmäßig eine Vielzahl gemeinnütziger Projekte, Organisationen und Initiativen. Wir engagieren uns in Kultur, Wissenschaft, Bildung und Sport, im sozialen, karitativen und humanitären Bereich. Mehr dazu erfahren Sie auf den Seiten 144–145.

## Weitere Angaben zur Corporate Governance bei ThyssenKrupp

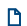

Einzelheiten: Seite 61

### Umsetzung des Deutschen Corporate Governance Kodex

Vorstand und Aufsichtsrat der ThyssenKrupp AG haben sich auch im Berichtsjahr intensiv mit der Erfüllung der Vorgaben des Deutschen Corporate Governance Kodex befasst, insbesondere mit den von der Kodex-Kommission am 26. Mai 2010 beschlossenen Änderungen. Auf dieser Basis haben sie zum 01. Oktober 2010 die Entsprechenserklärung nach § 161 Abs. 1 AktG abgegeben, die auf Seite 61 im Detail wiedergegeben ist.

ThyssenKrupp setzt die im Rahmen der Kodex-Änderungen eingeführten Bestimmungen zur Berücksichtigung von Frauen bei der Zusammensetzung des Vorstands und bei der Besetzung von Führungsfunktionen im Unternehmen um. Auch den neuen Bestimmungen zur Zusammensetzung des Aufsichtsrats wird entsprochen: Danach soll der Aufsichtsrat konkrete Ziele für seine Zusammensetzung benennen und diese bei Vorschlägen an die zuständigen Wahlgremien berücksichtigen. Diese Ziele werden im nachfolgenden Abschnitt dargestellt. Die Kodex-Kommission betont ferner die Verpflichtung der Aufsichtsratsmitglieder, die für deren Aufgaben erforderlichen Aus- und Fortbildungsmaßnahmen eigenverantwortlich wahrzunehmen, und empfiehlt den Unternehmen, sie dabei angemessen zu unterstützen; auch diese Empfehlung wird umgesetzt. Derzeit nicht entsprochen wird allein der modifizierte Empfehlung, wonach ein Vorstand einer börsennotierten Gesellschaft nicht mehr als drei Aufsichtsratsmandate in konzernexternen börsennotierten Gesellschaften und in Aufsichtsgremien von Gesellschaften mit vergleichbaren Anforderungen wahrnehmen soll. Nähere Informationen hierzu enthält die Entsprechenserklärung.

Bei unserer börsennotierten Tochtergesellschaft Eisen- und Hüttenwerke AG wird dem Kodex ebenfalls entsprochen, wobei die Besonderheiten der Konzerneinbindung berücksichtigt werden. Einzelne Abweichungen sind in der Entsprechenserklärung der Gesellschaft vom 01. Oktober 2010 dargelegt und begründet.



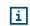

Das Kriterium der Vielfalt spielt künftig bei der Besetzung von Vorstand und Aufsichtsrat größere Rolle.

### Ziele des Aufsichtsrats hinsichtlich seiner Zusammensetzung

Präsidium, Nominierungsausschuss und Aufsichtsrat der ThyssenKrupp AG hatten bereits im September 2009 beschlossen, bei der Bestellung von Vorstandsmitgliedern und auch bei der Besetzung des Aufsichtsrats das Kriterium der Vielfalt verstärkt zu beachten. Zielrichtung war es schon damals, neben einer ausgewogenen fachlichen Qualifikation des Gremiums durch Berücksichtigung von Vielfalt auch eine größere Internationalität und eine angemessene Vertretung von Frauen im Vorstand und Aufsichtsrat zu erreichen.

Dieses Kriterium wurde von Nominierungsausschuss und Aufsichtsrat bei den Wahlvorschlägen der Anteilseignervertreter für die Hauptversammlung 2010 berücksichtigt. Der Aufsichtsrat hat nun sowohl auf Anteilseignerseite als auch auf Arbeitnehmerseite ein weibliches Mitglied, so dass bereits vor den letzten Kodex-Änderungen ein Frauenanteil von 10 % erreicht wurde. Mit der Wahl von Frau Prof. Dr. Weder di Mauro und Herrn Streiff ist der Aufsichtsrat darüber hinaus internationaler geworden. Auf Basis dieses ausgewogenen, am Unternehmensinteresse orientierten Gesamtvorschlags für alle zu wählenden Vertreter ist der Aufsichtsrat der ThyssenKrupp AG so zusammengesetzt, dass seine Mitglieder insgesamt über die zur ordnungsgemäßen Wahrnehmung seiner Aufgaben erforderlichen Kenntnisse, Fähigkeiten und fachlichen Erfahrungen verfügen.

Präsidium, Nominierungsausschuss und Aufsichtsrat haben am 03. September 2010 vereinbart, konkrete Ziele für die künftige Zusammensetzung des Aufsichtsrats festzulegen, diese aber nicht auf das Thema Frauenbeteiligung zu beschränken. Vielmehr sollen weitere Kriterien eine heterogene Besetzung des Aufsichtsrats sicherstellen. Im Einzelnen wurden folgende konkrete Ziele beschlossen:

- Beibehaltung eines Frauenanteils von jedenfalls 10 % bis zur Neuwahl der Anteilseignervertreter im Jahr 2015
- Weitere Erhöhung der Beteiligung von Frauen im Aufsichtsrat bei der nächsten regulären Neuwahl der Anteilseigner- und der Arbeitnehmervertreter. Der Frauenanteil soll mindestens 20 % erreichen, wobei ein gleichmäßiger Anteil auf Anteilseigner- und Arbeitnehmerseite angestrebt wird.
- Beibehaltung der Besetzung des Aufsichtsrats mit Mitgliedern mit internationalem Hintergrund mindestens im bisherigen Umfang
- Berücksichtigung besonderer Kenntnisse und Erfahrungen in der Anwendung von Rechnungslegungsgrundsätzen und internen Kontrollverfahren
- Berücksichtigung von technischem Sachverstand
- Berücksichtigung von Kenntnis des Unternehmens
- Unabhängigkeit der Aufsichtsratsmitglieder
- Vermeidung von Interessenkonflikten
- Berücksichtigung der Altersgrenze von 70 Jahren zum Zeitpunkt der Wahl

Die Wahlvorschläge des Aufsichtsrats zur Wahl von Aufsichtsratsmitgliedern sollen sich auch unter Berücksichtigung dieser Ziele weiterhin am Wohl des Unternehmens orientieren.



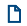

Einzelheiten: Seiten 287–289

### Vermeidung von Interessenkonflikten

Berater- oder sonstige Dienstleistungs- und Werkverträge zwischen Aufsichtsratsmitgliedern und der Gesellschaft bestanden auch im Berichtsjahr ausschließlich bei Herrn Dr. v. Schenck, der Aufsichtsratsmitglied unserer Gesellschaft und zugleich als Of Counsel der Rechtsanwaltssozietät Clifford Chance tätig ist. Soweit Clifford Chance 2009/2010 für das Unternehmen rechtsberatend tätig wurde, hat der Personalausschuss des Aufsichtsrats der Mandatierung zugestimmt. Interessenkonflikte von Vorstands- oder Aufsichtsratsmitgliedern, die dem Aufsichtsrat unverzüglich offenzulegen sind, traten nicht auf.

Den Seiten 287–289 können die von den Vorstands- und den Aufsichtsratsmitgliedern wahrgenommenen Mandate in gesetzlich zu bildenden Aufsichtsräten bzw. vergleichbaren in- und ausländischen Kontrollgremien von Wirtschaftsunternehmen entnommen werden. Mit Ausnahme von Herrn Dr. Schulz nehmen die Vorstandsmitglieder nicht mehr als drei Aufsichtsratsmandate in konzernexternen börsennotierten Gesellschaften oder in Aufsichtsgremien von Gesellschaften mit vergleichbaren Anforderungen wahr. Die Beziehungen zu nahestehenden Unternehmen und Personen sind im Anhang des Konzernabschlusses auf Seite 242 dargestellt.

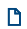

Einzelheiten: Seite 242

### Meldepflichtige Wertpapiergeschäfte sowie Aktienbesitz von Vorstand und Aufsichtsrat

Nach § 15a WpHG sind die Mitglieder des Vorstands und des Aufsichtsrats oder ihnen nahestehende Personen gesetzlich verpflichtet, den Erwerb und die Veräußerung von Aktien der ThyssenKrupp AG oder sich darauf beziehenden Finanzinstrumenten offenzulegen, wenn der Wert der Geschäfte, die sie innerhalb eines Kalenderjahres getätigt haben, die Summe von 5.000 € erreicht oder übersteigt. Der ThyssenKrupp AG sind für das Geschäftsjahr 2009/2010 keine Geschäfte gemeldet worden. Die in Vorjahren getätigten Geschäfte sind auf unserer Website veröffentlicht.

Der Gesamtbesitz aller Vorstands- und Aufsichtsratsmitglieder an Aktien der ThyssenKrupp AG betrug zum 30. September 2010 weniger als 1 % der von der Gesellschaft ausgegebenen Aktien.

### Selbstbehalt bei der D&O-Versicherung

Die Gesellschaft hat für die Mitglieder des Vorstands unter Berücksichtigung der gesetzlichen Vorgaben eine Vermögensschaden-Haftpflichtversicherung (sogenannte D&O-Versicherung) mit einem angemessenen Selbstbehalt abgeschlossen. Auch für die Mitglieder des Aufsichtsrats ist in Übereinstimmung mit dem Deutschen Corporate Governance Kodex eine D&O-Versicherung mit einem angemessenen Selbstbehalt vereinbart worden.

### Aktionäre und Hauptversammlung

Die Aktionäre der ThyssenKrupp AG nehmen ihre Rechte in der Hauptversammlung der Gesellschaft wahr, in der der Vorsitzende des Aufsichtsrats den Vorsitz führt. Die ordentliche Hauptversammlung findet einmal jährlich statt. Jede Aktie gewährt eine Stimme.

Die Anteilseigner können ihr Stimmrecht in der Hauptversammlung entweder selbst ausüben oder durch einen Bevollmächtigten ihrer Wahl oder durch einen weisungsgebundenen Stimmrechtsvertreter der Gesellschaft ausüben lassen. Weisungen zur Stimmrechtsausübung an den Stimmrechtsvertreter der Gesellschaft können vor sowie während der Hauptversammlung bis zum Ende der Generaldebatte über das Internet erteilt werden. Ferner wird den Aktionären erstmals zur Hauptversammlung 2011 angeboten, ihre Stimmen – ohne Bevollmächtigung eines Vertreters – schriftlich durch Briefwahl abzugeben. Aktionäre, die an der Hauptversammlung vor Ort nicht persönlich teilnehmen können, haben ebenso wie die interessierte Öffentlichkeit die Möglichkeit, die Veranstaltung in voller Länge live im Internet zu verfolgen.

Die Hauptversammlung wird bei ThyssenKrupp stets mit dem Ziel vorbereitet, den Aktionären alle relevanten Informationen frühzeitig zur Verfügung zu stellen. Insbesondere stellen wir den Geschäftsbericht über das abgelaufene Geschäftsjahr zeitnah zur Aufsichtsratssitzung, in der der Jahresabschluss festgestellt wird, auf der Website ein. Die Einberufung der Hauptversammlung mit den anstehenden Tagesordnungspunkten und einer Erläuterung der Teilnahmebedingungen sowie der Rechte der Aktionäre wird in der Regel eineinhalb Monate vor dem Hauptversammlungstermin bekannt gemacht.



Alle Dokumente und Informationen zur Hauptversammlung stehen auch auf unserer Website zur Verfügung. Außerdem besteht die Möglichkeit, per Infoline oder auf elektronischem Wege Fragen an die Mitarbeiter unserer Investor-Relations-Abteilung zu richten. Direkt im Anschluss an die Hauptversammlung veröffentlichen wir die Präsenz und die Abstimmungsergebnisse im Internet.

#### **Angemessenes Kontroll- und Risikomanagement**

Der Umgang mit Chancen und Risiken, die im Zusammenhang mit der Geschäftstätigkeit des Unternehmens entstehen, ist für Vorstand und Aufsichtsrat von grundsätzlicher Bedeutung für eine professionelle Unternehmensführung. Finanzwirtschaftlichen Risiken, wie dem Liquiditäts- und Kreditausfallrisiko, gilt eine besondere Aufmerksamkeit. Das systematische Risikomanagement im Rahmen unserer wertorientierten Unternehmensführung sorgt dafür, dass Risiken frühzeitig erkannt und bewertet sowie Risikopositionen optimiert werden. Über bestehende Risiken und deren Entwicklung wird der Aufsichtsrat vom Vorstand regelmäßig unterrichtet. Mit der Überwachung des Rechnungslegungsprozesses, der Wirksamkeit des internen Kontroll-, Risikomanagement- und Revisionssystems sowie der Überwachung der Abschlussprüfung befasst sich regelmäßig der Prüfungsausschuss des Aufsichtsrats. Das interne Kontrollsystem, das Risikomanagement- und das interne Revisionssystem werden kontinuierlich weiterentwickelt und den sich ändernden Rahmenbedingungen angepasst. Mit der Eingliederung des zentralen Risikomanagements in das Corporate Center Controlling der ThyssenKrupp AG im Rahmen der Neuorganisation des Konzerns konnten Planungs- und Reportingprozesse weiter verbessert werden. Wesentliche Merkmale unseres Kontroll- und Risikomanagementsystems können Sie den Seiten 163–166 entnehmen.

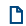

Einzelheiten: Seiten 163–166

#### **Transparente Unternehmensführung durch umfangreiche Information**

Um größtmögliche Transparenz und gleiche Chancen für alle zu gewährleisten, folgt unser Dialog mit dem Kapitalmarkt dem Anspruch, alle Zielgruppen gleichberechtigt und zeitnah zu informieren. Über aktuelle Entwicklungen im Konzern können sich Aktionäre und potenzielle Anleger jederzeit im Internet informieren. Dort werden sämtliche Presse- und Ad-hoc-Mitteilungen der ThyssenKrupp AG in deutscher und englischer Sprache publiziert. Die Satzung der Gesellschaft sowie die Geschäftsordnungen für den Vorstand, den Aufsichtsrat und den Prüfungsausschuss sind dort ebenso abrufbar wie die letzten Konzernabschlüsse, Zwischenberichte und detaillierte Informationen zur Umsetzung der Empfehlungen und Anregungen des Deutschen Corporate Governance Kodex. Alle Aktionäre und Interessenten können auf der Website einen elektronischen Newsletter abonnieren, der aktuell über Neuigkeiten aus dem Konzern berichtet.

Im Rahmen unserer Investor-Relations-Tätigkeit stehen wir in enger Verbindung mit unseren Aktionären und potenziellen Anlegern. Regelmäßig kommen wir beispielsweise mit Analysten und institutionellen Investoren zusammen. Die Orte und Termine von Roadshows und Anlegerkonferenzen sind im Internet jederzeit abrufbar. Ein intensiver Dialog erfolgt außerdem bei Analysten- und Investorenkonferenzen sowie im Rahmen von Telefonkonferenzen, die regelmäßig oder bei aktuellen Anlässen stattfinden. Sämtliche Präsentationen zu diesen Veranstaltungen lassen sich auf der Website frei einsehen. Dort werden auch Video- bzw. Audioaufzeichnungen der wesentlichen Veranstaltungen angeboten. Über die wiederkehrenden Termine wie das Datum der Hauptversammlung oder die Veröffentlichungstermine der Zwischenberichte unterrichten wir unsere Aktionäre, Analysten, Aktionärsvereinigungen, Medien sowie die interessierte Öffentlichkeit kontinuierlich in einem Finanzkalender. Dieser ist im Geschäftsbericht, in den Zwischenberichten sowie auf der Website der Gesellschaft veröffentlicht.

#### **Rechnungslegung und Abschlussprüfung durch KPMG**

Der Konzernabschluss und die Zwischenberichte von ThyssenKrupp werden nach den International Financial Reporting Standards (IFRS) aufgestellt, wie sie in der Europäischen Union anzuwenden sind. Der gesetzlich vorgeschriebene und für die Dividendenzahlung maßgebliche Einzelabschluss der ThyssenKrupp AG wird nach den Vorschriften des Handelsgesetzbuches (HGB) erstellt. Mit dem



Abschlussprüfer, der KPMG AG Wirtschaftsprüfungsgesellschaft, Berlin, haben wir auch für das Berichtsjahr vereinbart, dass der Vorsitzende des Prüfungsausschusses über während der Prüfung auftretende mögliche Ausschluss- oder Befangenheitsgründe sofort unterrichtet wird, soweit diese nicht unverzüglich beseitigt werden. Der Abschlussprüfer soll unverzüglich auch über alle für die Aufgaben des Aufsichtsrats wesentlichen Feststellungen und Vorkommnisse berichten, die sich bei der Durchführung der Abschlussprüfung ergeben. Außerdem hat der Abschlussprüfer den Aufsichtsrat zu informieren bzw. im Prüfungsbericht zu vermerken, wenn er bei Durchführung der Abschlussprüfung Tatsachen feststellt, die eine Unrichtigkeit der von Vorstand und Aufsichtsrat nach § 161 AktG abgegebenen Entsprechenserklärung ergeben.

## Vergütungsbericht

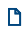

Einzelheiten: Seite 87

Der nachfolgende Vergütungsbericht ist Bestandteil des Lageberichts (siehe S. 87). Er beschreibt unter anderem das Vergütungssystem für den Vorstand auch über die Grundzüge hinaus.

### Leistungsbezogene Vergütung für den Vorstand

Die transparente und verständliche Darstellung der Vorstandsvergütung ist für uns seit Jahren ein wesentliches Element guter Corporate Governance. Die Gesamtvergütung der Vorstandsmitglieder besteht aus folgenden Vergütungsbestandteilen: dem Fixum, der Tantieme, dem Mid Term Incentiveplan (MTI), der ab dem Geschäftsjahr 2010/2011 in leicht geänderter Form als Long Term Incentiveplan (LTI) fortgeführt wird, sowie den Nebenleistungen (Sachbezüge) und Pensionszusagen. Die Vergütung für das Geschäftsjahr 2009/2010 beinhaltet zusätzlich einen Bonus, über dessen Gewährung im nächsten Geschäftsjahr erneut entschieden werden muss.

Für die Festlegung der individuellen Vorstandsvergütung ist gemäß dem am 05. August 2009 in Kraft getretenen Gesetz zur Angemessenheit der Vorstandsvergütung (VorstAG) sowie einer entsprechenden Regelung in der Geschäftsordnung für den Aufsichtsrat das Plenum nach Vorbereitung durch den Personalausschuss zuständig. Der Aufsichtsrat hatte bereits 2008 auf Vorschlag seines Personalausschusses das Vergütungssystem für den Vorstand einschließlich der wesentlichen Vertragselemente beschlossen und zugleich festgelegt, es regelmäßig zu überprüfen. In seiner Sitzung am 04. September 2009 hatte der Aufsichtsrat festgestellt, dass das Vergütungssystem den durch das VorstAG eingeführten Parametern weitgehend entspricht. Das Vergütungssystem für den Vorstand wurde von der Hauptversammlung am 21. Januar 2010 mit einer Mehrheit von 99,55 % des vertretenen Kapitals gebilligt.

Um eine vollständige Übereinstimmung mit den neuen gesetzlichen Grundlagen sicherzustellen, hat der Aufsichtsrat das Vergütungssystem in seinen Einzelheiten nochmals geprüft und in seiner Sitzung am 12. Mai 2010 angepasst. Das angepasste und nachstehend näher dargelegte Vergütungssystem wird der Hauptversammlung am 21. Januar 2011 zur Billigung vorgelegt.

### Vergütungssystem für den Vorstand

Kriterien für die Angemessenheit der Vorstandsvergütung sind sowohl die Aufgaben des einzelnen Vorstandsmitglieds, seine persönliche Leistung, die wirtschaftliche Lage, der Erfolg und die Zukunftsaussichten des Unternehmens als auch die Üblichkeit der Vergütung unter Berücksichtigung des Vergleichsumfelds und die Vergütungsstruktur, die in der Gesellschaft gilt. Die erfolgsbezogenen Komponenten, bestehend aus Tantieme, MTI (bzw. künftig LTI) und – im Geschäftsjahr 2009/2010 – Bonus, enthalten Bestandteile mit mehrjähriger Bemessungsgrundlage. Sie setzen damit langfristige Verhaltensanreize und richten die Vergütungsstruktur auf eine nachhaltige Unternehmensentwicklung aus.

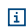

Das Vergütungssystem für den Vorstand erhielt in der Hauptversammlung hohe Zustimmung.



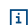

Die Vorstandsvergütung besteht aus erfolgsbezogenen und erfolgsunabhängigen Komponenten.

Vorstandsverträge, die ab dem Beginn des Geschäftsjahres 2008/2009 abgeschlossen wurden, sehen für den Fall, dass die Vorstandstätigkeit ohne wichtigen Grund vorzeitig endet, eine Ausgleichszahlung vor. Sie ist auf maximal zwei Jahresvergütungen einschließlich Nebenleistungen begrenzt (Abfindungs-Cap) und vergütet nicht mehr als die Restlaufzeit des Anstellungsvertrags. Eine Zusage für Leistungen aus Anlass der vorzeitigen Beendigung der Vorstandstätigkeit infolge eines Kontrollwechsels ("change of control"-Regelung) besteht nicht.

Zu den verschiedenen Vergütungsbestandteilen: Die Vergütung für die Vorstandsmitglieder setzt sich aus erfolgsunabhängigen und erfolgsbezogenen Komponenten zusammen. Die erfolgsunabhängigen Teile bestehen aus Fixum und Nebenleistungen sowie Pensionszusagen, während die erfolgsbezogenen Komponenten in Tantieme und MTI/LTI als Komponente mit langfristiger Anreizwirkung aufgeteilt sind. Für das abgelaufene Geschäftsjahr erhalten die Vorstandsmitglieder einen Bonus, der eine cash-flow-nahe Incentivierung des Vorstands beinhaltet.

#### Fixum

Das Fixum beträgt seit der letzten Überprüfung zum 01. Oktober 2008 für ein ordentliches Vorstandsmitglied 585.000 € pro Jahr und wird als erfolgsunabhängige Grundvergütung monatlich anteilig als Gehalt gezahlt. Die Vorstandsmitglieder erhalten zusätzlich Nebenleistungen in Form von Sachbezügen; diese bestehen bisher im Wesentlichen aus dem nach steuerlichen Richtlinien anzusetzenden Wert von Immobilien und deren Nebenkosten (bisher pauschaliert mit 55.000 € p.a.), Versicherungsprämien sowie der privaten Dienstwagennutzung. Als Vergütungsbestandteil sind diese Nebenleistungen vom einzelnen Vorstandsmitglied zu versteuern. Sie stehen allen Vorstandsmitgliedern prinzipiell in gleicher Weise zu; die Höhe variiert je nach der persönlichen Situation.

Eine Überprüfung des Fixum findet grundsätzlich nach Ablauf von zwei Jahren statt. Bei der Überprüfung zum 01. Oktober 2010 wurde zunächst die Sachbezugspauschale von 55.000 € dem Fixum zugeordnet, so dass sich entsprechend die Höhe der Sachbezüge vermindern wird. Darüber hinaus wurde das Fixum um 30.000 € erhöht, so dass es ab 01. Oktober 2010 insgesamt 670.000 € beträgt.

#### Tantieme

Erstes Element der erfolgsbezogenen Vergütung ist die Tantieme. Entsprechend der vom Aufsichtsrat beschlossenen Tantiemeregulation ist ihre Höhe grundsätzlich von der Entwicklung der beiden Kennzahlen EBT (Ergebnis vor Steuern) und ROCE (Gesamtkapitalrentabilität) des Konzerns abhängig, die je zur Hälfte als Kriterien herangezogen werden. Damit besteht ein Gleichklang zwischen der Tantieme als Leistungsanreiz und den im Konzern verwendeten Steuerungskennzahlen. So beträgt die Tantieme z.B. bei einem EBT von 2 Mrd € und einem ROCE von 14,5 % 1 Mio €. Die individuelle Leistung kann bis zu 20 % berücksichtigt werden. Außerordentliche Ereignisse bleiben bei der Tantiemefestsetzung außer Ansatz. Die Tantieme wird zwei Wochen nach der Festlegung durch den Aufsichtsrat, in der Regel Mitte November, an die einzelnen Vorstandsmitglieder ausgezahlt. Im Hinblick auf das VorstAG hat der Aufsichtsrat beschlossen, ab dem Geschäftsjahr 2009/2010 ein Viertel der Tantieme verpflichtend in Wertsteigerungsrechte der ThyssenKrupp Aktie umzuwandeln und nach einer dreijährigen Sperrfrist zu vergüten.

#### MTI und LTI

Weiterer Vergütungsbestandteil ist ab dem Geschäftsjahr 2010/2011 der LTI als variable Vergütungskomponente mit langfristiger Anreizwirkung. Dafür wurde der für das Geschäftsjahr 2009/2010 noch geltende MTI gemäß Beschluss des Aufsichtsrats in seinen Eckdaten modifiziert und wird unter der Bezeichnung Long Term Incentiveplan – LTI – fortgeführt. Bei dem bisherigen MTI werden dem ordentlichen Vorstandsmitglied für einen Ausgangswert von 150.000 € fiktiv Aktien gewährt (sogenannte Wertrechte, keine Aktienoptionen). Nach Ablauf eines dreijährigen Performance-Zeitraums wird der durchschnittliche ThyssenKrupp Value Added (TKVA) dieses Performance-Zeitraums mit dem durchschnittlichen TKVA der vorangegangenen drei Geschäftsjahre verglichen. Eine Veränderung des TKVA um 50 Mio € führt zu einer Veränderung der Wertrechte um 10 %. Die sich daraus ergebende Zahl der



Wertrechte wird mit dem Durchschnittskurs der ThyssenKrupp Aktie in den ersten drei Monaten nach Ende des Performance-Zeitraums multipliziert und ergibt den an das Vorstandsmitglied auszuzahlenden Betrag. Die Modifizierungen bei dem künftigen LTI betreffen die Erhöhung des MTI-Ausgangswertes von 150.000 € für ein ordentliches Vorstandsmitglied auf 500.000 € beim LTI; andererseits werden Veränderungen des TKVA erst berücksichtigt, wenn sie 200 Mio € erreichen (statt 50 Mio € beim MTI). Im Einzelnen stellt sich das LTI-System wie folgt dar:

Für einen bestimmten Ausgangswert, der bei einem ordentlichen Vorstandsmitglied 500.000 € beträgt, werden fiktiv Aktien gewährt, sogenannte Wertrechte, die keine Aktienoptionen sind. Die Anzahl der an ein Vorstandsmitglied ausgegebenen Wertrechte ergibt sich aus dem durchschnittlichen Aktienkurs des 1. Quartals des Performance-Zeitraums. Diese Wertrechte werden mit ihrem nach internationalen Bilanzierungsvorgaben errechneten Wert zum Zeitpunkt der Gewährung als Teil der Vergütung angesetzt. Die Zahl der ausgegebenen Wertrechte aus dem LTI wird dann am Ende des jeweiligen dreijährigen Performance-Zeitraums angepasst. Basis dafür ist ein Vergleich des durchschnittlichen TKVA des dreijährigen Performance-Zeitraums – beginnend mit dem 01. Oktober des Geschäftsjahres, in dem die Wertrechte gewährt wurden – mit dem durchschnittlichen TKVA der vorangegangenen drei Geschäftsjahre. Diese Vergütungskomponente deckt also insgesamt einen Zeitraum von sechs Jahren ab. Ein Anstieg des TKVA um 200 Mio € führt zu einer Erhöhung der Wertrechte um 5 %; verringert sich der durchschnittliche TKVA um 200 Mio €, sinkt die Anzahl der Wertrechte um 10 %. Mehr über den TKVA erfahren Sie auf den Seiten 93–95. Am Ende des Performance-Zeitraums erfolgt eine Vergütung der gewährten Wertrechte auf Basis des Durchschnittskurses der ThyssenKrupp Aktie, der sich aus dem Kursverlauf in den ersten drei Monaten nach Ende des Performance-Zeitraums ergibt. Die Auszahlung aus dem LTI ist wie beim MTI auf 1,5 Mio € für ein ordentliches Vorstandsmitglied begrenzt.

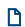

Einzelheiten: Seiten 93–95

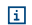

Über die Gewährung eines Bonus an den Vorstand wird jährlich neu entschieden.

### Bonus

Dieses System von Tantieme und MTI/LTI ist sinnvoll, aber unter bestimmten Konstellationen ergänzungsbedürftig. So wird für das Berichtsjahr – wie bereits für das Jahr davor – auf Grund des hohen negativen TKVA im Geschäftsjahr 2008/2009 trotz erheblicher Steigerungen im Geschäftsjahr 2009/2010 wegen der langfristigen Betrachtungsweise keine Zahlung aus dem bisherigen MTI erfolgen. In schwierigen wirtschaftlichen Jahren, die gerade einen besonderen Einsatz des Vorstands erfordern, sollten die Leistungen des Vorstands jedoch nicht nur mit dem Fixum honoriert werden, wie dies 2008/2009 der Fall war. Angesichts der dabei an den Vorstand gestellten Aufgaben und seiner besonderen Verantwortung würde dies die Wettbewerbsfähigkeit bei der Vorstandsvergütung beeinträchtigen. Ferner ist zu berücksichtigen, dass in kritischen Zeiten eine hohe finanzielle Disziplin unbedingt notwendig ist. Deswegen wird für einen gewissen Zeitraum eine erfolgsabhängige Vergütung auf Basis einer cash-flow-orientierten Kennzahl festgelegt. Hierbei werden im operativen Geschäft generierte Mittel in das Verhältnis zur Gesamtverschuldung des Konzerns gesetzt. Dies wird durch die Kennzahl "Funds From Operations/Total Debt" (FFO/TD) verkörpert, die es erlaubt, Schwankungen bei EBT und Net Working Capital sowie Investitionen untereinander auszugleichen. Bei Erreichen der vorgegebenen Ziele soll diese Leistung des Vorstands durch einen Bonus honoriert werden. Er beträgt bei einem FFO/TD von 10 % 450.000 € und erhöht sich grundsätzlich bei einem Anstieg des FFO/TD von 0,3 % um 50.000 €. Um die vom VorSTAG geforderte Nachhaltigkeit und mehrjährige Bemessungsgrundlage gerade auch im Verhältnis zwischen kurz- und langfristiger Vergütung sicherzustellen, werden 55 % des Bonus in Wertsteigerungsrechte der ThyssenKrupp Aktie umgewandelt und nach einer dreijährigen Sperrfrist (wie bei der Tantieme) vergütet. Ob und in welcher Höhe ein solcher Bonus erneut zu gewähren ist, wird jährlich neu entschieden.

### Pensionen

Pensionen werden an frühere Vorstandsmitglieder gezahlt, die entweder die Pensionsgrenze erreicht haben, dauerhaft arbeitsunfähig sind oder deren Anstellungsvertrag unter Anrechnung anderweitiger Einkünfte vorzeitig beendet oder nicht verlängert wurde. Eine Pension wird bei vorzeitiger Beendigung oder Nicht-Verlängerung des Anstellungsvertrags nach der jetzt verwendeten Neufassung der Verträge



nur gewährt, wenn sich das Vorstandsmitglied mindestens in der zweiten fünfjährigen Bestellperiode befindet und älter als 55 Jahre ist. Die Pension eines Vorstandsmitglieds bestimmt sich nach einem prozentualen Anteil am letzten Festgehalt, das das Mitglied vor Beendigung seines Anstellungsvertrags erhielt. Dieser Anteil steigt mit der Bestelldauer als Vorstandsmitglied. Er beträgt grundsätzlich 30 % mit Beginn der ersten, 50 % mit Beginn der zweiten und 60 % mit Beginn der dritten fünfjährigen Bestellperiode; die Pension von Herrn Dr. Schulz liegt bei 65 %. Laufende Renten werden jährlich gemäß dem Verbraucherpreisindex angepasst.

Die Hinterbliebenenversorgung sieht eine Zahlung von 60 % des Ruhegeldes für die Witwe (früher 75 %) und von 20 % für jedes unterhaltsberechtigten Kind (in der Regel bis zum 18. Lebensjahr, max. bis zum 25. Lebensjahr, in besonders begründeten Ausnahmefällen bis zur Vollendung des 27. Lebensjahres) vor; die Hinterbliebenenversorgung beträgt maximal 100 % des Ruhegeldes.

### 2009/2010 gewährte Gesamtvergütung des Vorstands

Einzelheiten der Vergütung des Vorstands im Geschäftsjahr 2009/2010 in individualisierter Form und die auf die einzelnen Mitglieder des Vorstands entfallenden Pensionen ergeben sich aus der nachfolgenden Tabelle. Die Vorjahreszahlen sind jeweils in Klammern angegeben:

#### VERGÜTUNG DES VORSTANDS 2009/2010 in Tsd €

|                                                                                       | Jahreseinkommen          |                      |                      |                      | Im Geschäftsjahr gewährte Wertsteigerungsrechte aus 25 % Tantieme |                    | Im Geschäftsjahr gewährte Wertsteigerungsrechte aus 55 % Bonus |                      | Im Geschäftsjahr gewährte MTI-Rechte |                      | Ins-<br>gesamt            | Pensionen                                                                                         |                                                                  |                                                                                |
|---------------------------------------------------------------------------------------|--------------------------|----------------------|----------------------|----------------------|-------------------------------------------------------------------|--------------------|----------------------------------------------------------------|----------------------|--------------------------------------|----------------------|---------------------------|---------------------------------------------------------------------------------------------------|------------------------------------------------------------------|--------------------------------------------------------------------------------|
|                                                                                       | Fixum                    | Nebenleistungen      | Tantieme (75 %)      | Bonus (45 %)         | Anzahl (Stk.)                                                     | Wert <sup>3)</sup> | Anzahl (Stk.)                                                  | Wert <sup>3)</sup>   | Anzahl (Stk.)                        | Wert <sup>3)</sup>   |                           | Aufwand (+)/<br>Ertrag (-)<br>aus aktien-<br>basierter<br>Vergütung<br>im Ge-<br>schäfts-<br>jahr | Jahres-<br>bezug<br>bei<br>Eintritt<br>des<br>Pensions-<br>falls | Zuführung<br>zur<br>Pensions-<br>rück-<br>stellung<br>im<br>Geschäfts-<br>jahr |
| Dr.-Ing.<br>Ekkehard<br>D. Schulz <sup>1)</sup><br>Vorsitzender                       | 966<br>(966)             | 130<br>(120)         | 611<br>(—)           | 532<br>(—)           | 8.964<br>(—)                                                      | 210<br>(—)         | 28.626<br>(—)                                                  | 671<br>(—)           | 10.172<br>(15.645)                   | 229<br>(207)         | 3.349<br>(1.293)          | 1.019<br>(– 641)                                                                                  | 628<br>(628)                                                     | 906<br>(602)                                                                   |
| Dr. Ulrich<br>Middelmann <sup>2)</sup><br>stellv.<br>Vorsitzender<br>(bis 21.01.2010) | 226<br>(732)             | 46<br>(173)          | 142<br>(—)           | 124<br>(—)           | 2.081<br>(—)                                                      | 49<br>(—)          | 6.646<br>(—)                                                   | 155<br>(—)           | 2.408<br>(11.852)                    | 54<br>(157)          | 796<br>(1.062)            | 237<br>(– 485)                                                                                    | 439<br>(439)                                                     | 638<br>(640)                                                                   |
| Dr. Olaf Berlien                                                                      | 585<br>(585)             | 94<br>(95)           | 370<br>(—)           | 322<br>(—)           | 5.433<br>(—)                                                      | 127<br>(—)         | 17.349<br>(—)                                                  | 407<br>(—)           | 6.165<br>(9.482)                     | 139<br>(125)         | 2.044<br>(805)            | 617<br>(– 388)                                                                                    | 293<br>(293)                                                     | 664<br>(289)                                                                   |
| Edwin Eichler                                                                         | 585<br>(585)             | 79<br>(82)           | 370<br>(—)           | 322<br>(—)           | 5.433<br>(—)                                                      | 127<br>(—)         | 17.349<br>(—)                                                  | 407<br>(—)           | 6.165<br>(9.482)                     | 139<br>(125)         | 2.029<br>(792)            | 617<br>(– 388)                                                                                    | 293<br>(293)                                                     | 879<br>(405)                                                                   |
| Dr. Alan Hippe                                                                        | 585<br>(293)             | 99<br>(63)           | 370<br>(—)           | 322<br>(—)           | 5.433<br>(—)                                                      | 127<br>(—)         | 17.349<br>(—)                                                  | 407<br>(—)           | 6.165<br>(4.741)                     | 139<br>(63)          | 2.049<br>(419)            | 617<br>(—)                                                                                        | 176<br>(176)                                                     | 368<br>(113)                                                                   |
| Ralph Labonte                                                                         | 585<br>(585)             | 92<br>(93)           | 370<br>(—)           | 322<br>(—)           | 5.433<br>(—)                                                      | 127<br>(—)         | 17.349<br>(—)                                                  | 407<br>(—)           | 6.165<br>(9.482)                     | 139<br>(125)         | 2.042<br>(803)            | 617<br>(– 388)                                                                                    | 293<br>(293)                                                     | 1.177<br>(501)                                                                 |
| <b>Insgesamt</b>                                                                      | <b>3.532<br/>(3.746)</b> | <b>540<br/>(626)</b> | <b>2.233<br/>(—)</b> | <b>1.944<br/>(—)</b> | <b>32.777<br/>(—)</b>                                             | <b>767<br/>(—)</b> | <b>104.668<br/>(—)</b>                                         | <b>2.454<br/>(—)</b> | <b>37.240<br/>(60.684)</b>           | <b>839<br/>(802)</b> | <b>12.309<br/>(5.174)</b> | <b>3.724<br/>(– 2.290)</b>                                                                        | <b>2.122<br/>(2.122)</b>                                         | <b>4.632<br/>(2.550)</b>                                                       |

<sup>1)</sup> Zuschlag 65 %

<sup>2)</sup> Zuschlag 25 %

<sup>3)</sup> zum Gewährungszeitpunkt

Die entsprechenden Vorjahreswerte (jeweils in Tsd €) für die im Geschäftsjahr 2008/2009 ausgeschiedenen Vorstandsmitglieder Jürgen H. Fechter (Ende des Anstellungsvertrags: 31.03.2009), Dr.-Ing. Karl-Ulrich Köhler (Ende des Anstellungsvertrags: 31.03.2009) und Dr.-Ing. Wolfram Mörsdorf (Ende des Anstellungsvertrags: 14.04.2009) betragen: Fixum: Fechter 293, Dr.-Ing. Köhler 293, Dr.-Ing. Mörsdorf 341; Nebenleistungen: Fechter 46, Dr.-Ing. Köhler 41, Dr.-Ing. Mörsdorf 37; Tantieme: Fechter 0, Dr.-Ing. Köhler 0, Dr.-Ing. Mörsdorf 0; Insgesamt: Fechter 464, Dr.-Ing. Köhler 459, Dr.-Ing. Mörsdorf 446; Ertrag (-) aus aktienbasierter Vergütung: Fechter -388, Dr.-Ing. Köhler -388, Dr.-Ing. Mörsdorf -388; Jahresbezug bei Eintritt des Pensionsfalls: Fechter 293, Dr.-Ing. Köhler 293, Dr.-Ing. Mörsdorf 293; Zuführung zur Pensionsrückstellung: Fechter 164, Dr.-Ing. Köhler 251, Dr.-Ing. Mörsdorf 315.

Seit dem 01. Oktober 2010 gehört Dr. Heinrich Hiesinger dem Vorstand an, und zwar ab 01. Oktober 2010 als stellvertretender Vorstandsvorsitzender und mit Ablauf der Hauptversammlung am 21. Januar 2011 als Vorstandsvorsitzender. Dr. Hiesinger wurde im Berichtsjahr für die ihm auf Grund seines Wechsels zur ThyssenKrupp AG entstehenden Nachteile durch den Wegfall von Aktienzusagen seitens der Siemens AG ein Ausgleich in Höhe von rund 4,3 Mio € gewährt.

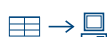

Download der Tabellen unter:  
[http://www.thyssenkrupp.com/financial-reports/09\\_10/de/](http://www.thyssenkrupp.com/financial-reports/09_10/de/)



Insgesamt betrug die Vergütung der aktiven Mitglieder des Vorstands für die Tätigkeit im Geschäftsjahr 2009/2010 12,3 Mio € (Vorjahr: 5,2 Mio €).

Im Berichtsjahr betrugen die Zuführungen zu den Pensionsrückstellungen für die aktiven Vorstandsmitglieder 4.632 Tsd € (Vorjahr: 2.550 Tsd € zuzüglich 730 Tsd € für die im Geschäftsjahr 2008/2009 ausgeschiedenen Vorstandsmitglieder Fechter, Dr. Köhler und Dr. Mörsdorf). Der Betrag für 2009/2010 setzt sich aus den Dienstzeitaufwendungen (service cost) in Höhe von 1.187 Tsd € (Vorjahr: 714 Tsd € zuzüglich 165 Tsd € für die im Geschäftsjahr 2008/2009 ausgeschiedenen Vorstandsmitglieder Fechter, Dr. Köhler und Dr. Mörsdorf), den Zinsaufwendungen (interest cost) in Höhe von 1.906 Tsd € (Vorjahr: 1.836 Tsd € zuzüglich 565 Tsd € für die im Geschäftsjahr 2008/2009 ausgeschiedenen Vorstandsmitglieder Fechter, Dr. Köhler und Dr. Mörsdorf) sowie den nachzuverrechnenden Dienstzeitaufwendungen (past service cost) in Höhe von 1.539 Tsd € zusammen. Die Herren Dr. Schulz und Dr. Middelman erhalten auf Basis einer vertraglichen Zusage, die für danach bestellte Vorstandsmitglieder nicht mehr gilt, wegen ihrer mehr als zehnjährigen Bestelldauer als Vorstandsmitglied für die Dauer von fünf Jahren nach der Pensionierung weiterhin einen PKW mit Fahrer und bestimmte Versicherungsleistungen; Herrn Dr. Schulz steht ferner auf Grund seiner Leistungen für das Unternehmen ein Büro mit Sekretärin für fünf Jahre zu. Für die künftigen Pensionsansprüche hat die Gesellschaft auf Basis von IFRS Pensionsrückstellungen gebildet.

Weitere Leistungen für den Fall der Beendigung der Tätigkeit wurden keinem Vorstandsmitglied zugesagt. Auch hat kein Mitglied des Vorstands im Berichtsjahr Leistungen oder entsprechende Zusagen von einem Dritten im Hinblick auf seine Tätigkeit als Vorstandsmitglied erhalten. Wie in den Vorjahren wurden Vorstandsmitgliedern im Berichtsjahr weder Kredite noch Vorschüsse gewährt noch wurden zu ihren Gunsten Haftungsverhältnisse eingegangen.

Die 5. Tranche des MTI, die im abgelaufenen Geschäftsjahr fällig wurde, führte wegen des stark gesunkenen TKVA 2008/2009 zu keiner Zahlung. Im Vorjahr haben die Vorstandsmitglieder aus der 4. Tranche folgende Zahlungen erhalten: Herr Dr. Schulz 880.000 €, Herr Dr. Middelman 667.000 €, die Herren Dr. Berlien, Eichler, Fechter, Labonte, Dr. Köhler und Dr. Mörsdorf je 533.000 €. Im Februar 2010 wurden den Vorstandsmitgliedern neue Wertrechte aus der 8. Tranche gewährt. Aus der 6. bis 8. Tranche des MTI verfügen die Vorstandsmitglieder über insgesamt 119.429 gewährte, aber noch nicht auszahlungsreife Wertrechte.

Die Gesamtbezüge der früheren Mitglieder des Vorstands und ihrer Hinterbliebenen beliefen sich auf 14,5 Mio € (Vorjahr: 24,4 Mio €). Für Pensionsverpflichtungen gegenüber früheren Mitgliedern des Vorstands und ihren Hinterbliebenen wurden nach IFRS 190,6 Mio € (Vorjahr: 173,5 Mio €) zurückgestellt.

#### Aktienkursorientierte Vergütung für weitere Führungskräfte

Neben dem Vorstand erhalten weitere ausgewählte Führungskräfte des Konzerns einen Teil ihrer Bezüge in Form einer aktienkursorientierten Vergütung. Dabei handelt es sich zum einen um den MTI und zum anderen um ein Programm zum rabattierten Bezug von ThyssenKrupp Aktien.

Mit dem MTI soll bei Führungskräften wertorientiertes, an den Zielen des Konzerns ausgerichtetes Verhalten gefördert und honoriert werden. Darüber hinaus soll der Plan dazu beitragen, die Bindung an den Konzern zu stärken. Beginnend mit der 2. Tranche des MTI, deren Ausgabe 2004 erfolgte, wurde der Kreis der Bezugsberechtigten auf die Vorstandsmitglieder der damaligen Segmentführungsgesellschaften und einige andere ausgewählte Führungskräfte zu modifizierten Bedingungen ausgedehnt. Heute gehören neben den Vorständen der Business Areas Geschäftsführer und ausgewählte Führungskräfte großer Konzernunternehmen zum Teilnehmerkreis. Aus dem MTI für diesen Personenkreis resultierte im Berichtsjahr ein Aufwand von 4,0 Mio € (Vorjahr: Ertrag 15,6 Mio €). Über Neuauflage und Teilnehmerkreis des MTI entscheidet der Vorstand der ThyssenKrupp AG.

#### 1

„Rabattierter Aktienkauf für Führungskräfte“ ist eine aktienkursorientierte Vergütungskomponente.



Daneben existiert für ausgewählte Führungskräfte des Konzerns in Deutschland, die nicht durch den MTI begünstigt sind, das Programm „Rabattierter Aktienkauf für Führungskräfte“. Das im Geschäftsjahr 2005/2006 implementierte Modell erweitert die jeweils am Unternehmenserfolg ausgerichtete variable Vergütung um ein konzernbezogenes Element, das die zentrale Steuerungsgröße TKVA in das Anreizsystem integriert. Dieser aktienkurs- und wertorientierte Vergütungsbestandteil soll die Konzentration auf die Konzernziele und die Identifikation der Führungskräfte mit dem Unternehmen stärken.

Die Begünstigten erhalten dabei nach Ablauf des Performance-Zeitraums das Angebot, ThyssenKrupp Aktien zu einem festgelegten Euro-Betrag mit einem Rabatt zu erwerben, der vom Arbeitgeber getragen wird. Den verbleibenden Betrag leisten die Teilnehmer als Eigenanteil. Die Rabatt-höhe ist vom (Konzern-)TKVA des Performance-Zeitraums abhängig und kann bis zu 80 % betragen. Die im Rahmen des Programms erworbenen Aktien sind mit einer Sperrfrist von drei Jahren belegt.

Im Berichtsjahr wurde das für 2007/2008 beschlossene Programm umgesetzt; daraus resultierte ein Aufwand von 0,9 Mio € (Vorjahr: 3,0 Mio €). Für das Geschäftsjahr 2008/2009 wurde das Programm ausgesetzt. Die Neuauflage des Programms für das Berichtsjahr, dessen Umsetzung 2010/2011 erfolgen soll, wurde durch den Vorstand der ThyssenKrupp AG im September 2010 beschlossen. Auch über künftige Neuauflagen entscheidet dieser jährlich neu.

#### Angemessene Aufsichtsratsvergütung

Die Vergütung des Aufsichtsrats ist in § 14 der Satzung der ThyssenKrupp AG geregelt. Sie trägt der Verantwortung und dem Tätigkeitsumfang der Aufsichtsratsmitglieder sowie der wirtschaftlichen Lage und dem Erfolg des Konzerns Rechnung.

Neben der Erstattung ihrer Auslagen und einem Sitzungsgeld von 500 € erhalten die Mitglieder des Aufsichtsrats eine Vergütung, die sich aus drei Bestandteilen zusammensetzt: einem Festbetrag von 50.000 € und zwei erfolgsorientierten Bausteinen. Dies ist zum einen eine Tantieme von 300 € je 0,01 € Dividende, die über 0,10 € je Stückaktie hinaus für das jeweils abgelaufene Geschäftsjahr an die Aktionäre ausgeschüttet wird. Hinzu kommt eine auf den langfristigen Unternehmenserfolg bezogene jährliche Vergütung in Höhe von 2.000 € je 100 Mio € Ergebnis vor Steuern (EBT) im Konzernabschluss, das im Durchschnitt der letzten drei Geschäftsjahre ein EBT von 1 Mrd € übersteigt.

Die feste Vergütung, die Tantieme und die auf den langfristigen Unternehmenserfolg bezogene Komponente betragen für den Vorsitzenden jeweils das Dreifache und für seinen Stellvertreter das Doppelte der Beträge. Vorsitz und Mitgliedschaft in den Aufsichtsratsausschüssen werden entsprechend dem Deutschen Corporate Governance Kodex gesondert vergütet. Aufsichtsratsmitglieder, die nur einen Teil des Geschäftsjahres dem Aufsichtsrat angehören, erhalten eine im Verhältnis geringere Vergütung. Nimmt ein Aufsichtsratsmitglied an einer Sitzung des Plenums oder einer Ausschuss-Sitzung nicht teil, reduziert sich die Vergütung für die Aufsichtsrats- bzw. Ausschusstätigkeit anteilig.

Auf Basis der vorgeschlagenen Dividende erhalten die Aufsichtsratsmitglieder einschließlich des Sitzungsgeldes für das Berichtsjahr eine Vergütung von insgesamt 1,8 Mio € (Vorjahr: 1,9 Mio €). Auf die einzelnen Mitglieder entfallen die in der nachfolgenden Tabelle aufgelisteten Beträge. Da das durchschnittliche EBT im Konzernabschluss der letzten drei Geschäftsjahre unter der Schwelle von 1 Mrd € liegt, erfolgt für das Geschäftsjahr 2009/2010 keine Auszahlung aus der langfristigen Vergütungskomponente.

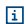

Die Vergütung des Aufsichtsrats besteht aus drei Komponenten.



## VERGÜTUNG DES AUFSICHTSRATS in €

|                                                       | 2008/2009        |                |                         |                               | 2009/2010        |                |                         |                               |
|-------------------------------------------------------|------------------|----------------|-------------------------|-------------------------------|------------------|----------------|-------------------------|-------------------------------|
|                                                       | fixe Vergütung   | Tantieme       | langfristige Komponente | Gesamtvergütung <sup>2)</sup> | fixe Vergütung   | Tantieme       | langfristige Komponente | Gesamtvergütung <sup>2)</sup> |
| Dr. Gerhard Cromme, Vorsitzender <sup>1)</sup>        | 200.000          | 24.000         | 29.172                  | 263.672                       | 200.000          | 42.000         | —                       | 251.500                       |
| Bertin Eichler, stellv. Vorsitzender <sup>1)</sup>    | 146.095          | 17.531         | 21.310                  | 194.436                       | 150.000          | 31.500         | —                       | 190.000                       |
| Markus Bistram (bis 15.09.2009)                       | 59.439           | 7.132          | 8.917                   | 79.988                        | —                | —              | —                       | —                             |
| Theo Frielinghaus (bis 31.03.2010) <sup>1)</sup>      | 62.500           | 7.500          | 8.326                   | 82.826                        | 28.040           | 5.888          | —                       | 35.928                        |
| Markus Grolms (seit 14.10.2009) <sup>1)</sup>         | —                | —              | —                       | —                             | 52.909           | 11.111         | —                       | 66.520                        |
| Heinrich Hentschel (bis 23.01.2009)                   | 15.753           | 1.890          | 5.629                   | 24.272                        | —                | —              | —                       | —                             |
| Susanne Herberger <sup>1)</sup>                       | 34.384           | 4.126          | 1.670                   | 42.180                        | 60.582           | 12.722         | —                       | 76.304                        |
| Prof. Jürgen Hubbert (bis 21.01.2010)                 | 50.000           | 6.000          | 7.293                   | 66.293                        | 15.479           | 3.251          | —                       | 19.730                        |
| Klaus Ix (bis 23.01.2009)                             | 16.994           | 2.039          | 6.072                   | 26.605                        | —                | —              | —                       | —                             |
| Bernd Kalwa <sup>1)</sup>                             | 40.295           | 4.835          | 1.958                   | 50.088                        | 62.500           | 13.125         | —                       | 79.125                        |
| Hüseyin Kavvesoglu (bis 23.01.2009)                   | 16.994           | 2.039          | 6.072                   | 26.605                        | —                | —              | —                       | —                             |
| Prof. Dr. Hans-Peter Keitel (seit 21.01.2010)         | —                | —              | —                       | —                             | 34.658           | 7.278          | —                       | 43.436                        |
| Ernst-August Kiel (seit 12.04.2010)                   | —                | —              | —                       | —                             | 21.991           | 4.618          | —                       | 27.109                        |
| Dr. Martin Kohlhaussen (bis 21.01.2010) <sup>1)</sup> | 75.000           | 9.000          | 10.940                  | 100.440                       | 17.875           | 3.754          | —                       | 23.629                        |
| Dr. Heinz Kriwet (bis 21.01.2010) <sup>1)</sup>       | 62.500           | 7.500          | 9.116                   | 83.616                        | 16.678           | 3.502          | —                       | 21.680                        |
| Prof. Dr. Ulrich Lehner <sup>1)</sup>                 | 60.548           | 7.266          | 5.012                   | 76.826                        | 62.500           | 13.125         | —                       | 80.625                        |
| Dr.-Ing. Klaus T. Müller (bis 23.01.2009)             | 15.753           | 1.890          | 5.629                   | 24.272                        | —                | —              | —                       | —                             |
| Prof. Dr. Bernhard Pellens <sup>1)</sup>              | 62.500           | 7.500          | 9.116                   | 84.116                        | 71.164           | 14.945         | —                       | 91.609                        |
| Dr. Heinrich v. Pierer (bis 15.11.2008)               | 6.500            | 780            | 5.332                   | 12.612                        | —                | —              | —                       | —                             |
| Peter Remmler                                         | 34.384           | 4.126          | 1.670                   | 42.180                        | 50.000           | 10.500         | —                       | 63.000                        |
| Dr. Kersten v. Schenck <sup>1)</sup>                  | 62.500           | 7.500          | 9.116                   | 83.616                        | 57.084           | 11.987         | —                       | 71.571                        |
| Peter Scherrer                                        | 44.444           | 5.333          | 6.483                   | 58.260                        | 50.000           | 10.500         | —                       | 63.000                        |
| Thomas Schlenz <sup>1)</sup>                          | 87.500           | 10.500         | 12.762                  | 119.262                       | 87.500           | 18.375         | —                       | 113.375                       |
| Dr. Henning Schulte-Noelle <sup>1)</sup>              | 72.222           | 8.667          | 10.534                  | 97.923                        | 71.667           | 15.050         | —                       | 92.217                        |
| Wilhelm Segerath <sup>1)</sup>                        | 62.534           | 7.504          | 9.121                   | 84.159                        | 62.500           | 13.125         | —                       | 80.625                        |
| Peer Steinbrück (seit 21.01.2010) <sup>1)</sup>       | —                | —              | —                       | —                             | 38.353           | 8.054          | —                       | 47.907                        |
| Christian Streiff                                     | 44.444           | 5.333          | 6.483                   | 58.260                        | 50.000           | 10.500         | —                       | 63.000                        |
| Jürgen R. Thumann <sup>1)</sup>                       | 43.699           | 5.244          | 2.123                   | 54.066                        | 55.331           | 11.620         | —                       | 69.451                        |
| Prof. Dr. Beatrice Weder di Mauro (seit 21.01.2010)   | —                | —              | —                       | —                             | 32.347           | 6.793          | —                       | 40.140                        |
| Klaus Wiercimok                                       | 34.384           | 4.126          | 1.670                   | 42.180                        | 50.000           | 10.500         | —                       | 63.000                        |
| <b>Insgesamt</b>                                      | <b>1.411.366</b> | <b>169.361</b> | <b>201.526</b>          | <b>1.878.753</b>              | <b>1.399.158</b> | <b>293.823</b> | <b>—</b>                | <b>1.774.481</b>              |

<sup>1)</sup> Dr. Gerhard Cromme als Vorsitzender des Aufsichtsrats und des Präsidiums, Vermittlungsausschusses, Personalausschusses und Strategie-, Finanz- und Investitionsausschusses sowie als Mitglied des Prüfungsausschusses, Bertin Eichler als stellv. Vorsitzender des Aufsichtsrats und Mitglied des Präsidiums, Vermittlungsausschusses, Personalausschusses, Prüfungsausschusses und Strategie-, Finanz- und Investitionsausschusses, Dr. Martin Kohlhaussen als Vorsitzender des Prüfungsausschusses (anteilig für die Zeit seiner Tätigkeit), Prof. Dr. Bernhard Pellens als Vorsitzender und Mitglied des Prüfungsausschusses (jeweils anteilig für die Zeit seiner Tätigkeit), Dr. Henning Schulte-Noelle als Mitglied des Präsidiums, Vermittlungsausschusses und Personalausschusses, Thomas Schlenz als Mitglied des Präsidiums, Vermittlungsausschusses, Personalausschusses und Prüfungsausschusses, Prof. Dr. Ulrich Lehner als Mitglied des Prüfungsausschusses und Strategie-, Finanz- und Investitionsausschusses (jeweils anteilig für die Zeit seiner Tätigkeit), Wilhelm Segerath als Mitglied des Prüfungsausschusses sowie Theo Frielinghaus, Markus Grolms, Susanne Herberger, Dr. Heinz Kriwet, Peer Steinbrück und Jürgen R. Thumann (jeweils anteilig für die Zeit ihrer Tätigkeit) sowie Bernd Kalwa und Dr. Kersten v. Schenck jeweils als Mitglied des Strategie-, Finanz- und Investitionsausschusses erhalten eine höhere feste und variable Vergütung.

<sup>2)</sup> In der Gesamtvergütung sind zusätzlich die an die Aufsichtsratsmitglieder gezahlten Sitzungsgelder enthalten. Die Mitglieder des Aufsichtsrats erhielten für jede Sitzung des Aufsichtsrats und seiner Ausschüsse, an der sie teilgenommen haben, ein Sitzungsgeld in Höhe von 500 €. Dr. Gerhard Cromme erhielt Sitzungsgeld in Höhe von 9.500 € (Vorjahr: 10.500 €), Bertin Eichler in Höhe von 8.500 € (Vorjahr: 9.500 €), Theo Frielinghaus in Höhe von 2.000 € (Vorjahr: 4.500 €), Markus Grolms in Höhe von 2.500 € (Vorjahr: 0 €), Susanne Herberger in Höhe von 3.000 € (Vorjahr: 2.000 €), Prof. Jürgen Hubbert in Höhe von 1.000 € (Vorjahr: 3.000 €), Bernd Kalwa in Höhe von 3.500 € (Vorjahr: 3.000 €), Prof. Dr. Hans-Peter Keitel in Höhe von 1.500 € (Vorjahr: 0 €), Ernst-August Kiel in Höhe von 500 € (Vorjahr: 0 €), Dr. Martin Kohlhaussen in Höhe von 2.000 € (Vorjahr: 5.500 €), Dr. Heinz Kriwet in Höhe von 1.500 € (Vorjahr: 4.500 €), Prof. Dr. Ulrich Lehner in Höhe von 5.000 € (Vorjahr: 4.000 €), Prof. Dr. Bernhard Pellens in Höhe von 5.500 € (Vorjahr: 5.000 €), Peter Remmler in Höhe von 2.500 € (Vorjahr: 2.000 €), Dr. Kersten v. Schenck in Höhe von 2.500 € (Vorjahr: 4.500 €), Peter Scherrer in Höhe von 2.500 € (Vorjahr: 2.000 €), Thomas Schlenz in Höhe von 7.500 € (Vorjahr: 8.500 €), Dr. Henning Schulte-Noelle in Höhe von 5.500 € (Vorjahr: 6.500 €), Wilhelm Segerath in Höhe von 5.000 € (Vorjahr: 5.000 €), Peer Steinbrück in Höhe von 1.500 € (Vorjahr: 0 €), Christian Streiff in Höhe von 2.500 € (Vorjahr: 2.000 €), Jürgen R. Thumann in Höhe von 2.500 € (Vorjahr: 3.000 €), Prof. Dr. Beatrice Weder di Mauro in Höhe von 1.000 € (Vorjahr: 0 €) und Klaus Wiercimok in Höhe von 2.500 € (Vorjahr: 2.000 €). Sitzungsgeld im Vorjahr erhielten zudem Markus Bistram in Höhe von 4.500 €, Heinrich Hentschel in Höhe von 1.000 €, Klaus Ix in Höhe von 1.500 €, Hüseyin Kavvesoglu in Höhe von 1.500 € und Dr.-Ing. Klaus T. Müller in Höhe von 1.000 €. Insgesamt wurden Sitzungsgelder in Höhe von 81.500 € (Vorjahr: 96.500 €) ausbezahlt.

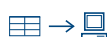

Download der Tabellen unter:

[http://www.thyssenkrupp.com/financial-reports/09\\_10/de/](http://www.thyssenkrupp.com/financial-reports/09_10/de/)



Mitgliedern des Aufsichtsrats der ThyssenKrupp AG werden für Aufsichtsratsmandate bei Konzerngesellschaften für das Geschäftsjahr 2009/2010 ergänzend Vergütungen in Höhe von 79.543 € (Vorjahr: 124.206 €) gewährt. Auf die einzelnen Mitglieder des Aufsichtsrats entfallen die in der nachfolgenden Tabelle aufgeführten Beträge:

**VERGÜTUNG AUS KONZERNINTERNEN AUFSICHTSRATSMANDATEN in €**

|                                     | 2008/2009      | 2009/2010     |
|-------------------------------------|----------------|---------------|
| Markus Bistram (bis 15.09.2009)     | 40.109         | —             |
| Theo Frielinghaus (bis 31.03.2010)  | 23.559         | 3.819         |
| Susanne Herberger (seit 23.01.2009) | 16.003         | 16.500        |
| Klaus Ix (bis 23.01.2009)           | 7.524          | —             |
| Bernd Kalwa (seit 23.01.2009)       | 12.315         | 15.750        |
| Hüseyin Kavvesoglu (bis 23.01.2009) | 6.586          | —             |
| Ernst-August Kiel (seit 12.04.2010) | —              | 9.382         |
| Thomas Schlenz                      | 17.000         | 19.732        |
| Wilhelm Segerath                    | —              | 14.360        |
| Klaus Wiercimok (seit 23.01.2009)   | 1.110          | —             |
| <b>Insgesamt</b>                    | <b>124.206</b> | <b>79.543</b> |

Aufsichtsratsmitglieder haben darüber hinaus im Berichtsjahr mit einer Ausnahme wie auch im Vorjahr keine weiteren Vergütungen bzw. Vorteile für persönlich erbrachte Leistungen, insbesondere Beratungs- und Vermittlungsleistungen, erhalten. Die Rechtsanwaltssozietät Clifford Chance, für die das Aufsichtsratsmitglied Herr Dr. Kersten v. Schenck als Of Counsel tätig ist, hat für ihre Beratungsleistungen von ThyssenKrupp Unternehmen insgesamt 70.702 € (Vorjahr: 79.737 €) erhalten. Wie in den Vorjahren wurden Aufsichtsratsmitgliedern im Berichtsjahr weder Kredite noch Vorschüsse gewährt noch wurden zu ihren Gunsten Haftungsverhältnisse eingegangen.

Frühere Aufsichtsratsmitglieder, die vor dem 01. Oktober 2009 aus dem Aufsichtsrat ausgeschieden sind, erhalten für die Zeit ihrer Zugehörigkeit zum Aufsichtsrat keine Vergütung aus der langfristigen Vergütungskomponente, da das durchschnittliche EBT im Konzernabschluss der letzten drei Geschäftsjahre unter der Schwelle von 1 Mrd € liegt. Im Vorjahr lag der Betrag bei 3.773 € (Gerold Vogel 612 €, Prof. Dr. Gang Wan 3.161 €).

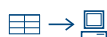



# ThyssenKrupp Aktie

Der Kurs der ThyssenKrupp Aktie war im Geschäftsjahr 2009/2010 durch die Aufwärtsentwicklung des Gesamtmarktes positiv beeinflusst. Außerdem profitierte er von den strategischen und operativen Maßnahmen zur Verbesserung unserer Ertragssituation. Belastend wirkten sich dagegen die erheblichen Preissteigerungen bei Rohstoffen wie z.B. Eisenerz aus. Zum Ende des Geschäftsjahres am 30. September 2010 betrug der Aktienkurs 23,92 €.

## KENNZAHLEN ZUR THYSSENKRUPP AKTIE

|                                                         |           | 2005/2006 | 2006/2007 | 2007/2008 | 2008/2009 | 2009/2010          |
|---------------------------------------------------------|-----------|-----------|-----------|-----------|-----------|--------------------|
| Grundkapital                                            | Mio €     | 1.317     | 1.317     | 1.317     | 1.317     | 1.317              |
| Anzahl Aktien (insgesamt)                               | Mio Stück | 514,5     | 514,5     | 514,5     | 514,5     | 514,5              |
| Börsenwert Ende September                               | Mio €     | 13.670    | 22.977    | 10.819    | 12.106    | 12.306             |
| Kurs Ende September                                     | €         | 26,57     | 44,66     | 21,03     | 23,53     | 23,92              |
| Höchstkurs                                              | €         | 29,09     | 46,14     | 46,63     | 25,05     | 28,07              |
| Tiefstkurs                                              | €         | 16,62     | 26,19     | 20,78     | 12,11     | 19,82              |
| Dividende                                               | €         | 1,00      | 1,30      | 1,30      | 0,30      | 0,45 <sup>1)</sup> |
| Dividendensumme                                         | Mio €     | 489       | 635       | 603       | 139       | 209 <sup>1)</sup>  |
| Dividendenrendite                                       | %         | 3,8       | 2,9       | 6,2       | 1,3       | 1,9 <sup>1)</sup>  |
| EPS                                                     | €         | 3,24      | 4,30      | 4,59      | - 4,01    | 1,77               |
| Anzahl Aktien (im Umlauf <sup>2)</sup> )                | Mio Stück | 507,7     | 488,8     | 477,8     | 463,5     | 464,0              |
| Aktienumsatz Inland<br>(durchschnittlicher Tagesumsatz) | Mio Stück | 4,5       | 3,8       | 4,3       | 4,8       | 3,4                |

<sup>1)</sup> Vorschlag an die Hauptversammlung <sup>2)</sup> gewichteter Durchschnitt

## Konjunktur und Rohstoffpreise beeinflussen die Kursentwicklung erheblich

Im 1. Quartal 2009/2010 konnte die ThyssenKrupp Aktie ihre positive Kursentwicklung, die zum Ende des vorangegangenen Geschäftsjahres begonnen hatte, weiter fortsetzen. Einflussfaktoren waren die allgemeine konjunkturelle Erholung sowie die strategischen und operativen Maßnahmen bei ThyssenKrupp. Die Aktie hat sich in dieser Zeit deutlich besser entwickelt als die Vergleichsindizes DAX und DJ STOXX und notierte am 08. Januar 2010 mit 28,07 € auf dem Höchststand im Geschäftsjahr. Im 2. Quartal verlor die Kursentwicklung der ThyssenKrupp Aktie nach einer Schwächephase Ende Januar an Dynamik und orientierte sich sehr stark an der Performance der Indizes. Diese Phase hielt bis zur Mitte des 3. Quartals an. Im Anschluss und bis zum Beginn des 4. Quartals war die Kursentwicklung durch Sorgen belastet, die konjunkturelle Erholung könne sich erneut abschwächen. Hinzu kamen stark

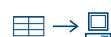

Download der Tabellen unter:  
[http://www.thyssenkrupp.com/financial-reports/09\\_10/de/](http://www.thyssenkrupp.com/financial-reports/09_10/de/)



gestiegene Preise für Rohstoffe, die insbesondere die Aktien von Stahlherstellern wie z.B. ArcelorMittal, Salzgitter und VoestAlpine unter Druck setzten. Dem konnte sich auch die ThyssenKrupp Aktie nicht entziehen, zeigte aber relative Stärke gegenüber den Vergleichsunternehmen. Im 4. Quartal setzte eine spürbare Erholung ein. Am 30. September 2010 notierte die ThyssenKrupp Aktie bei 23,92 € mit einem Plus von 1,7 % gegenüber dem Vorjahres-Stichtag. Die Indizes DAX und DJ STOXX schlossen im selben Zeitraum mit einem Plus von 9,8 % bzw. 10,1 % ab. Die nachfolgenden Grafiken zeigen die Kursentwicklung im Detail.

#### ENTWICKLUNG DER THYSSENKRUPP AKTIE IM VERGLEICH indexiert, vom 30.09.2009 bis 30.09.2010 in %

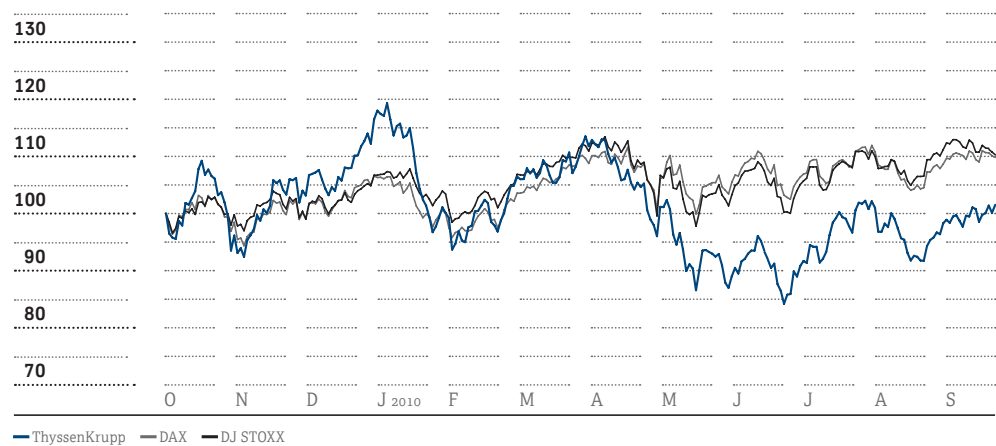

#### HÖCHST- UND TIEFSTKURSE DER THYSSENKRUPP AKTIE in €

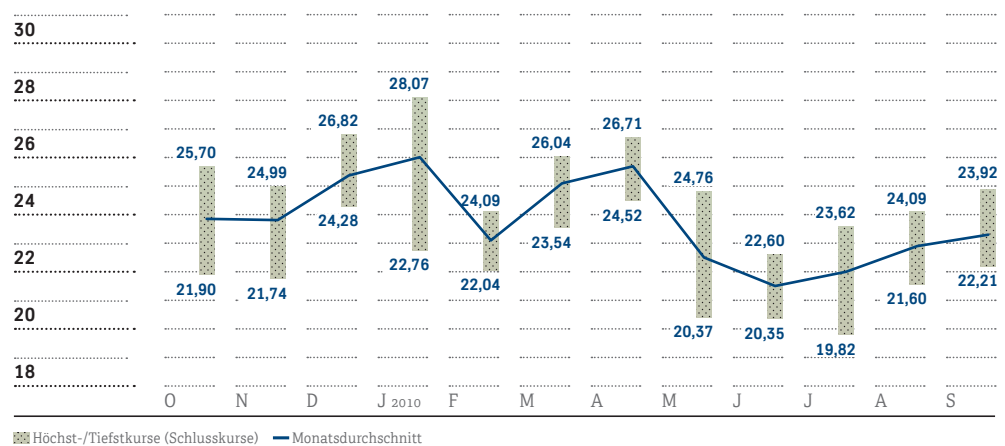



**MARKTKAPITALISIERUNG DER THYSSENKRUPP AG in Mio €**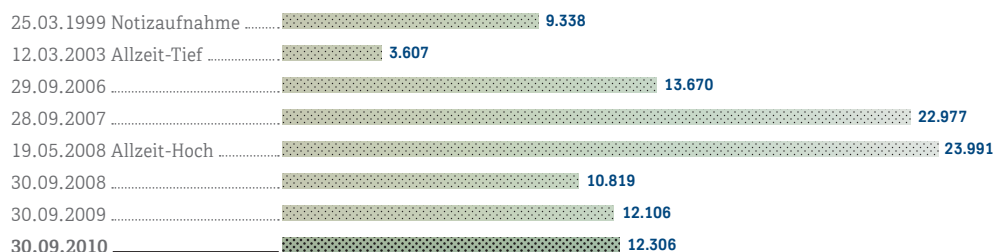

Die Marktkapitalisierung hat sich im Vergleich zum Vorjahr erhöht. Zum Geschäftsjahresende am 30. September 2010 betrug sie rund 12,3 Mrd €.

**Börsennotiz in Frankfurt und Düsseldorf**

Die ThyssenKrupp Aktie ist seit dem 25. März 1999 an den folgenden Börsenplätzen notiert:

**STAMMDATEN DER THYSSENKRUPP AKTIE**

|                                        | Wertpapier-Kenn-Nummer |
|----------------------------------------|------------------------|
| <b>Börsenplätze</b>                    |                        |
| Frankfurt (Prime Standard), Düsseldorf | DE 000 750 0001        |
| <b>Kürzel</b>                          |                        |
| Börsen                                 | Frankfurt, Düsseldorf  |
| Reuters                                | Börse Frankfurt        |
|                                        | Xetra-Handel           |
| Bloomberg                              | Xetra-Handel           |
|                                        | TKA                    |
|                                        | TKAG.F                 |
|                                        | TKAG.DE                |
|                                        | TKA GY                 |

Im Xetra- und Parketthandel an den deutschen Börsen wurden im Geschäftsjahr 2009/2010 rund 900 Mio Stück ThyssenKrupp Aktien gehandelt. Der Rückgang um rund 25 % gegenüber dem Vorjahr ist auf die Normalisierung der Aktienmärkte nach den starken Einbrüchen im Zuge der Finanzkrise zurückzuführen. Im Berichtsjahr lag der durchschnittliche Tagesumsatz bei rund 3,4 Mio Stück Aktien; im vorherigen Geschäftsjahr hatte er noch bei rund 4,8 Mio Stück gelegen. Die Gesamtumsätze der ThyssenKrupp Aktie machten etwa 2,3 % vom Gesamtumsatz der 30 DAX-Werte aus (Vorjahr: 2,2 %). Damit waren die Handelsumsätze in der ThyssenKrupp Aktie weniger rückläufig als die des Gesamtmarktes.

Mit dem DAX 30, dem DJ STOXX, dem DJ Germany Titans, dem DJ Industrial Goods & Services Titans 30, dem FT EuroTop 300 und den verschiedenen MSCI-Indizes ist die ThyssenKrupp Aktie in einer Reihe wesentlicher, auch internationaler Indizes enthalten. Grundsätzlich wird durch die Zugehörigkeit zu einem Index die Aufmerksamkeit für das jeweilige Unternehmen gesteigert; das fördert die Gewinnung insbesondere internationaler Investoren. Auch die zunehmende Popularität von Indexfonds bei Privatanlegern und die damit verbundenen Kapitalzuflüsse wirken sich günstig auf die Liquidität von in Indizes enthaltenen Aktien aus.

Seit dem 20. September 2010 ist die ThyssenKrupp Aktie im Dow Jones Sustainability Index Europe gelistet. Mit der Aufnahme in diesen Index haben sich die Voraussetzungen verbessert, auch Investoren zu gewinnen, die auf Nachhaltigkeitsthemen fokussiert sind.

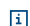

Die ThyssenKrupp Aktie gehört mehreren internationalen Börsenindizes an.



### Ergebnis je Aktie von 1,77 €

Das Ergebnis je Aktie – Earnings per Share (EPS) – wird errechnet, indem man den Jahresüberschuss, der den Aktionären der ThyssenKrupp AG zugerechnet wird, durch den gewichteten Durchschnitt der während des Geschäftsjahres im Umlauf befindlichen Aktien dividiert. Im Berichtsjahr waren durchschnittlich 464,0 Mio Stückaktien im Umlauf.

### Dividendenvorschlag von 0,45 € je Aktie

Der Hauptversammlung am 21. Januar 2011 wird vorgeschlagen, für das Geschäftsjahr 2009/2010 eine Dividende in Höhe von 0,45 € je Stückaktie auszuschütten. Bezogen auf den Aktienkurs von 23,92 € am 30. September 2010 ergibt sich daraus eine Dividendenrendite von 1,9 %. Die Ausschüttungsquote beträgt 26,1 % vom Jahresüberschuss der ThyssenKrupp AG bzw. 25,4 % vom den Aktionären der ThyssenKrupp AG zurechenbaren Konzern-Jahresüberschuss.

#### DIVIDENDENZAHLUNG DER THYSSENKRUPP AG in €

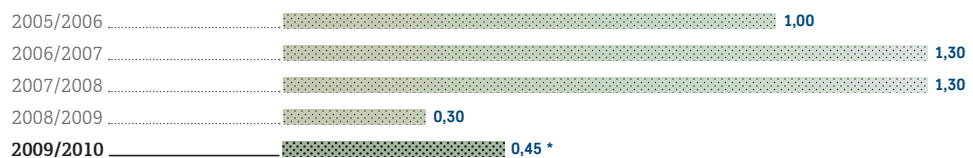

\* Vorschlag an die Hauptversammlung

### Grundkapital in unveränderter Höhe

Das Grundkapital beträgt unverändert 1.317.091.952,64 €. Es ist in 514.489.044 auf den Inhaber lautende Stückaktien eingeteilt. Diese Aktien sind in Sammelurkunden verbrieft. Ein Anspruch des Aktionärs auf Verbriefung seiner Aktien ist durch die Satzung ausgeschlossen. Nach § 19 der Satzung der ThyssenKrupp AG gewährt jede Aktie eine Stimme.

### Weitere Internationalisierung der Aktionärsstruktur

Eine wesentliche Aufgabe von Investor Relations bei ThyssenKrupp ist die gezielte Investorenansprache, um bestehende Aktionärskontakte zu pflegen und neue potenzielle Anleger zu gewinnen. Als Planungsgrundlage für Roadshows und die Teilnahme an Investorenkonferenzen dient die zweimal im Jahr im März und September durchgeführte detaillierte Analyse der Aktionärsstruktur. Die jüngste Analyse per Ende September 2010 hat ergeben, dass die Anzahl der identifizierten institutionellen Investoren mit ThyssenKrupp Aktien im Portfolio auf 434 gestiegen ist – gegenüber 433 in der Analyse vom März 2010.

Dabei hat sich der seit einiger Zeit zu beobachtende Trend der weiteren Internationalisierung der Aktionärsbasis bestätigt. Gegenüber der Analyse im März 2010 erhöhten Anleger in Großbritannien, Irland und in Kontinentaleuropa (ohne Deutschland) ihren Anteil an der Gesellschaft weiter. Institutionelle Anleger in Großbritannien und Irland halten nun 10,3 % am Grundkapital (+0,9 Prozentpunkte). In Kontinentaleuropa werden 10,0 % am Grundkapital gehalten (+1,3 Prozentpunkte). Die bedeutendste Region dort ist nun Norwegen, nachdem der norwegische Staatsfonds den Anteil an ThyssenKrupp deutlich ausgebaut hat, gefolgt von Frankreich und der Schweiz. Der Anteil von nordamerikanischen Investoren am Grundkapital ist weitestgehend konstant geblieben und beträgt aktuell 9,7 % (–0,3 Prozentpunkte). In Deutschland ansässige institutionelle Investoren halten 8,5 % vom Grundkapital (–1,4 Prozentpunkte).

Größter Aktionär ist die Alfred Krupp von Bohlen und Halbach-Stiftung, Essen (AKBH-Stiftung). Die Stiftung ist mit einem Anteil von 25,33 % am Grundkapital der ThyssenKrupp AG beteiligt.

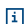

Die Aktionärsbasis von ThyssenKrupp ist im Berichtsjahr internationaler geworden.



Nach Aktienrückkäufen in den Geschäftsjahren 2005/2006 und 2007/2008 hält die ThyssenKrupp AG 50.094.707 eigene Aktien. Dies entspricht 9,74 % des Grundkapitals. Die eigenen Aktien sind weder stimm- noch dividendenberechtigt. Die Anzahl der ausstehenden Aktien betrug zum Ende des Berichtsjahres 464.394.337 Stück. Die Zunahme um 920.845 Stück gegenüber Vorjahr ergab sich aus der Verwendung eigener Aktien für Mitarbeiterprogramme im Geschäftsjahr 2009/2010.

Unter Berücksichtigung des Anteils der AKBH-Stiftung und der eigenen Aktien beträgt der Free Float oder Streubesitz, der in der Regel zur Gewichtung der ThyssenKrupp Aktie in Aktienindizes herangezogen wird, 64,93 % des Grundkapitals.

In den vergangenen Jahren wurde die Aktionärsbasis deutlich verbreitert und vor allem weiter internationalisiert. Mittlerweile kommen 70 % der 20 größten institutionellen Investoren aus dem Ausland. Unsere Investor-Relations-Anstrengungen zur Erhöhung des Bekanntheitsgrades von ThyssenKrupp auf den internationalen Kapitalmärkten greifen.

### Das Interesse an der ThyssenKrupp Aktie steigt

In den letzten beiden Jahren ist die Anzahl der Analysten, die ThyssenKrupp beobachten und konkrete Anlageempfehlungen aussprechen, um 25 % auf 35 Analysten gestiegen. Zum Ende des Geschäftsjahres 2009/2010 haben gut 80 % dieser Analysten die ThyssenKrupp Aktie zum Kauf empfohlen. Erhebliches Wertpotenzial wird in den eingeleiteten strukturellen Verbesserungen sowie den neuen Stahlwerken in Brasilien und den USA gesehen.

Allgemein ist das Interesse des Kapitalmarktes an der ThyssenKrupp Aktie nicht zuletzt auf Grund der eingeleiteten strukturellen und operativen Verbesserungen in den Handlungsfeldern Effizienz, Projekte und Portfolio weiter gestiegen.

Auch die größere Transparenz im Zuge der neuen Konzernstruktur erfuhr vom Kapitalmarkt positive Resonanz. Analysten haben damit begonnen, bei ihren Anlageempfehlungen die Ertragsperspektiven unserer Industriegüter-Aktivitäten, der sogenannten Industrials, stärker zu berücksichtigen.

Die Aufteilung des ehemaligen Segments Steel in die Business Areas Steel Europe und Steel Americas sowie des ehemaligen Segments Technologies in die Business Areas Plant Technology, Components Technology sowie Marine Systems und die damit verbundene externe Offenlegung von bewertungsrelevanten Finanzkennzahlen ermöglichen eine präzisere Modellierung der einzelnen Geschäftsfelder. Damit fördert die größere Transparenz auch eine angemessene Bewertung der ThyssenKrupp Aktie. Weitere Vorteile sind, dass nun der Hochlauf der neuen Stahlwerke anhand der zur Verfügung gestellten Finanzkennzahlen klar verfolgt und die wirtschaftliche Entwicklung der einzelnen Geschäftsfelder von ThyssenKrupp noch besser mit denen der Wettbewerber verglichen werden können.

Einhergehend mit der größeren Transparenz ist die stärkere Akzentuierung der Industrials-Geschäfte ein Schwerpunkt der Marketing-Anstrengungen von Investor Relations am Kapitalmarkt. Schließlich haben diese Geschäfte, wie beispielsweise Elevator Technology oder Plant Technology, in der jüngsten Krise wesentliche Beiträge zur Stützung des Konzernergebnisses geleistet bzw. verzeichnen, wie beispielsweise Components Technology, erhebliche Ergebnissteigerungen auf Grund der eingeleiteten strukturellen Verbesserungen. Hierzu wurden deren Equity Stories noch prägnanter aufbereitet; gezielt wurde auch der Kontakt mit entsprechenden Analysten und Fondsmanagern gesucht. Investor Relations ist dafür in Verbindung zu Brokern mit ausgewiesener Expertise insbesondere in Skandinavien getreten und nahm häufiger als früher an Konferenzen mit Industrials-Schwerpunkt teil. Insgesamt wurde die Teilnahme an Investorenkonferenzen um 50 % gegenüber 2009 erhöht; die ThyssenKrupp Aktie konnte einer Vielzahl neuer Investoren präsentiert werden. Die Kontakte mit Investoren insgesamt haben wir um mehr als 6 % auf über 900 gesteigert.

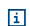

ThyssenKrupp Investor Relations betont stärker die Industrials-Geschäfte des Konzerns.



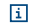

Unser Kapitalmarkt-Marketing fokussiert sich in erster Linie auf Europa und die USA.

Einen wichtigen Beitrag zur Ausweitung der Kontakte haben auch die sogenannten Field Trips geleistet, bei denen Gruppen von Fondsmanagern Gelegenheit haben, bei Werksführungen, kombiniert mit Gesprächen mit dem Management, Einblicke in das operative Geschäft zu erhalten. Auch hier hat Investor Relations die Aktivitäten unserer Division Technologies mehr in den Vordergrund gerückt. Die Anzahl der Materials und Industrials Field Trips hat sich gegenüber Vorjahr auf insgesamt acht mehr als verdoppelt.

Beim Shareholder Targeting – der strukturierten Pflege bestehender und gezielter Gewinnung neuer Investorenkontakte – hat Investor Relations die Fokussierung auf Finanzplätze mit hoher Finanzkraft fortgesetzt. Neben den europäischen Destinationen in Deutschland, Großbritannien, der Schweiz, Frankreich, Italien, Spanien, Österreich sowie den skandinavischen Ländern werden wir künftig mit Nachdruck unser Kapitalmarkt-Marketing in den USA ausbauen. Die Ost- und Westküste sowie der mittlere Westen sind unsere Ziele. Die Ausweitung unseres operativen Geschäfts in Nord- und Südamerika mit den neuen Werken in Brasilien und den USA gibt uns gute Ansatzpunkte, die Aktionärsstruktur auch in diesen Regionen auszubauen. In São Paulo wurden deshalb bereits erste Investorengespräche geführt. Daneben behalten wir Kanada weiter im Blick. Mit Investoren in Asien stehen wir entweder über Videokonferenzen oder über in Europa ansässige Entscheidungsträger in Kontakt.

Ein weiterer Schwerpunkt von Investor Relations ist der intensive persönliche Kontakt mit unseren Privatanlegern. Im Mittelpunkt des Dialogs stehen die jährliche Hauptversammlung, aber auch eine Reihe von Unternehmenspräsentationen vor privaten Anlegern in unterschiedlichen Regionen Deutschlands. Hierbei arbeiten wir in der Regel mit Aktionärsvereinigungen oder ortsansässigen Kreditinstituten zusammen.

Wenn Sie Kontakt zum Corporate Center Investor Relations aufnehmen möchten oder sich über die geplanten Termine des Finanzkalenders 2010/2011 informieren wollen, so finden Sie alle notwendigen Informationen auf Seite 294 dieses Geschäftsberichts oder im Internet unter [www.thyssenkrupp.com](http://www.thyssenkrupp.com) unter der Überschrift Investor Relations.



# Konzernlagebericht

S. 81–182

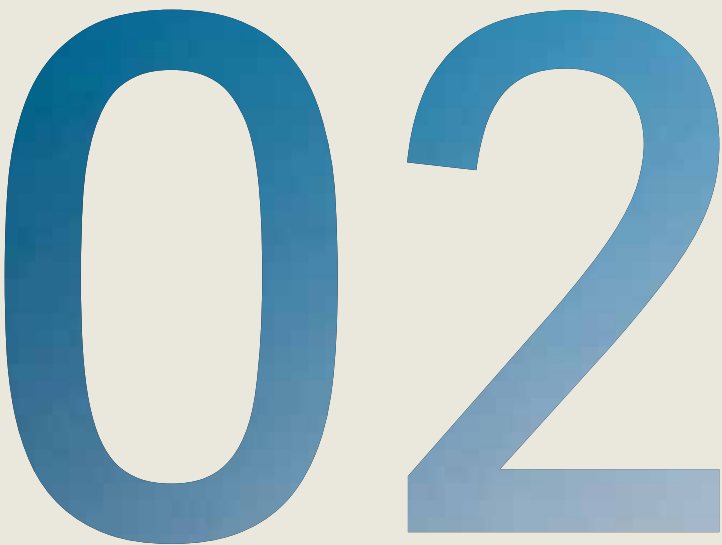

Der Geschäftsverlauf im Berichtsjahr, die aktuelle Lage des Konzerns sowie die wesentlichen Chancen und Risiken der künftigen Entwicklung bilden die Schwerpunkte des Konzernlageberichts. Von der Neuorganisation des Konzerns zum 01. Oktober 2009 und seiner strategischen Ausrichtung über die Geschäftsentwicklung in den acht Business Areas, die technologische Kompetenz, die Mitarbeiterentwicklung und den Umweltschutz bis zum Ausblick auf die kommenden zwei Geschäftsjahre – daraus ergibt sich ein aussagekräftiges Bild über Ihr Unternehmen.

## Inhalt

|            |                                                                                                                                                                                                                                                                                                                                                                                                                                                                                              |            |                                                                                                                                                                                                                                                                                                             |
|------------|----------------------------------------------------------------------------------------------------------------------------------------------------------------------------------------------------------------------------------------------------------------------------------------------------------------------------------------------------------------------------------------------------------------------------------------------------------------------------------------------|------------|-------------------------------------------------------------------------------------------------------------------------------------------------------------------------------------------------------------------------------------------------------------------------------------------------------------|
| <b>85</b>  | <b>Geschäftsfelder und Organisationsstruktur</b><br>Leistungsprofil, 85<br>Führungsverantwortung im Konzern, 86<br>Erklärung zur Unternehmensführung, 87<br>Vergütungsbericht, 87<br>Übernahmerechtliche Angaben, 87                                                                                                                                                                                                                                                                         | <b>144</b> | <b>Gesellschaftliches Engagement</b><br>Unterstützung von gemeinnützigen Projekten, 144<br>Netzwerke und Wissensaustausch, 145                                                                                                                                                                              |
| <b>91</b>  | <b>Unternehmenssteuerung – Ziele und Strategie</b><br>Strategische Perspektiven, 91<br>Unternehmenssteuerung durch wertorientiertes Management, 93<br>ThyssenKrupp PLuS, 97<br>ThyssenKrupp best, 97                                                                                                                                                                                                                                                                                         | <b>146</b> | <b>Innovationen</b><br>Innovationsaufwendungen, 146<br>ThyssenKrupp House of Innovation, 147<br>Innovationen in allen Business Areas, 148                                                                                                                                                                   |
| <b>100</b> | <b>Überblick über den Geschäftsverlauf im Konzern</b><br>Gesamtwirtschaftliche Rahmenbedingungen, 100<br>Branchenwirtschaftliche Rahmenbedingungen, 101<br>ThyssenKrupp – positive Geschäftsentwicklung, 104<br>Absatzmärkte und Marketing, 109<br>Investitionen und Netto-Finanzschulden, 110<br>Beschaffung: Bedeutung des Einkaufs steigt, 111<br>Energie: Günstige Erdgasbezüge, 114<br>Zusammenfassende Bewertung des Vorstands zur wirtschaftlichen Entwicklung und Zielerfüllung, 116 | <b>152</b> | <b>Umwelt- und Klimaschutz</b><br>Umweltschutzaufwendungen weiter erhöht, 152<br>Umwelt- und Klimaschutz-Management-system, 153<br>Querschnitt erfolgreicher Umweltschutzprojekte, 153<br>Umwelt- und klimafreundliche Produkte, 155<br>Klimaschutz mit hohem Stellenwert, 156                              |
| <b>117</b> | <b>Geschäftsverlauf in den Business Areas</b><br>Steel Europe, 117<br>Steel Americas, 120<br>Stainless Global, 122<br>Materials Services, 124<br>Elevator Technology, 126<br>Plant Technology, 128<br>Components Technology, 130<br>Marine Systems, 133<br>Bereich Corporate der ThyssenKrupp AG, 134                                                                                                                                                                                        | <b>157</b> | <b>Mitarbeiter</b><br>Belegschaftsentwicklung, 157<br>Ausbildung, 158<br>Altersteilzeit und betriebliche Altersversorgung, 159<br>Hochschulen und akademischer Nachwuchs, 159<br>Arbeitsschutz und Gesundheitsvorsorge, 160<br>Führungskräfteentwicklung, 161<br>Vielfalt als personalpolitisches Ziel, 162 |
| <b>135</b> | <b>Finanz- und Vermögenslage</b><br>Zentrale Finanzierung und Liquiditätssicherung, 135<br>Analyse der Kapitalflussrechnung, 136<br>Analyse der Bilanzstruktur, 137<br>Nicht bilanziertes Vermögen und außerbilanzielle Finanzierungsinstrumente, 140                                                                                                                                                                                                                                        | <b>163</b> | <b>Risikobericht</b><br>Risikomanagement effizient organisiert, 163<br>Zentrale Risikofelder im Fokus, 166<br>Risiken der künftigen gesamtwirtschaftlichen Entwicklung, 171<br>Spezifische Risiken unserer Aktivitäten, 171<br>Bestand des Konzerns gesichert, 174                                          |
| <b>142</b> | <b>Nachhaltigkeit</b><br>Nachhaltigkeitsmanagement, 142<br>Nachhaltigkeitsaktivitäten, 143                                                                                                                                                                                                                                                                                                                                                                                                   | <b>175</b> | <b>Nachtrags-, Chancen- und Prognosebericht</b><br>Besondere Ereignisse nach Bilanzstichtag, 175<br>Konjunkturausblick, 175<br>Chancenbericht, 178<br>Erwartete Ertragslage, 180<br>Erwartete Finanz- und Liquiditätslage, 182                                                                              |



## ThyssenKrupp Quartier, Essen, Deutschland

Schon das offen und transparent gestaltete ThyssenKrupp Quartier verrät, dass sich das Unternehmen am Standort Essen bewusst als Corporate Citizen, als Teil der Gemeinschaft sieht. Die Öffentlichkeit ist eingeladen, das Gelände zu entdecken; gleichzeitig engagiert sich das Unternehmen in der Gesellschaft. Die Förderung von Bildung und Ausbildung sowie das Engagement für eine saubere Umwelt und eine lebenswerte Region sind nur zwei Beispiele dafür.

*Entwicklung von Technologien zur  
Einsparung von Ressourcen und Energie*

*Schaffung großzügiger Grün- und  
Erholungsflächen auf dem Gelände für  
Mitarbeiter und Bürger gleichermaßen*

*Wirtschaftliche Stärkung des  
Wirtschaftsstandorts Ruhr und  
Bekenntnis zur Region*

*Förderung von Bildung und  
Ausbildung, Schulen, Universitäten*

*Aufwertung der Infrastruktur  
und Verkehrswege*

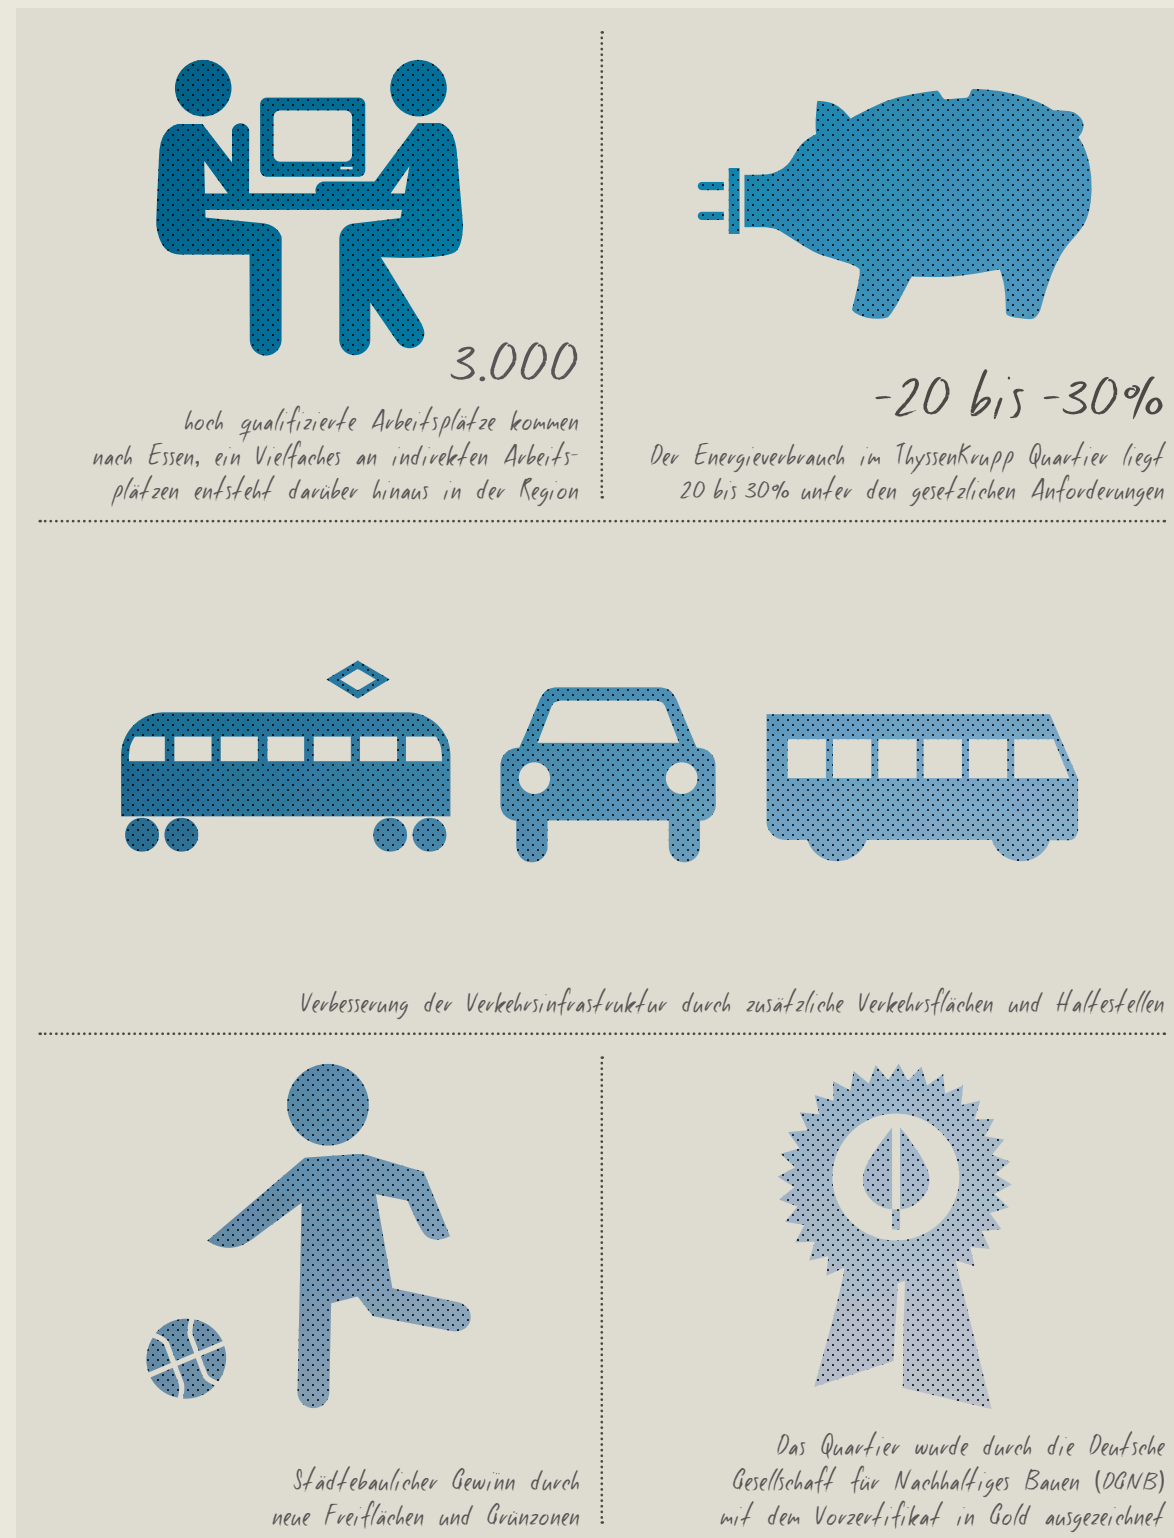

Impulse  
geben



# Geschäftsfelder und Organisationsstruktur

Mit innovativer Leistungspalette, effizienter Organisation und klarer Führungsstruktur stellt sich ThyssenKrupp den Herausforderungen der Märkte und den Ansprüchen der internationalen Kunden. Unsere ständig verbesserten Produkte, die gleichermaßen Wirtschaftlichkeit und technische Qualität verbinden, markieren intelligente Fortschritte rund um Werkstoffe und Technologiegüter, die beiden großen Aktivitätsfelder des Konzerns.

## Leistungsprofil

Kundenoptimierte Stahlqualitäten aller Art, aber auch Kunststoffe oder Aluminium gehören zum Werkstoffangebot von ThyssenKrupp für Geschäftspartner in rund 80 Ländern der Welt. Hinzu kommen Technologiegüter wie Aufzüge und Fahrtreppen, komplette Industriekomplexe, Komponenten beispielsweise für Fahrzeugbau und Windturbinen sowie moderne Marinetchnik. Mehr als 177.000 Mitarbeiter auf allen fünf Kontinenten setzen sich in Produktion und Dienstleistungen täglich für die Bedürfnisse unserer zumeist industriellen Kunden ein.

### THYSSENKRUPP KONZERN

#### Corporate Headquarter

ThyssenKrupp AG

#### Business Areas

##### Division Materials

Steel  
Europe

Steel  
Americas

Stainless  
Global

Materials  
Services

##### Division Technologies

Elevator  
Technology

Plant  
Technology

Components  
Technology

Marine  
Systems

#### Business Services

ThyssenKrupp Business Services

ThyssenKrupp IT Services



### Organisationsstruktur

ThyssenKrupp hat zum 01. Oktober 2009 eine neue Konzernorganisation eingeführt. Die früher in fünf Segmenten zusammengefassten Aktivitäten bündeln sich nun in acht Business Areas mit jeweils mehreren Operating Units. Als inhaltliche Klammern beschreiben zwei Divisions – Materials und Technologies – die strategische Ausrichtung des Konzerns. Die Business Areas und ihre Konzernunternehmen operieren selbstständig am Markt, während die ThyssenKrupp AG als Corporate Headquarter den Konzern strategisch steuert.

Zusätzlich erbringen zwei Business-Services-Gesellschaften standardisierte konzernweite Dienstleistungen für alle Konzernunternehmen; es sind beispielsweise Teile des Rechnungswesens und der IT oder die Entgeltabrechnung. Neben den strategischen Aufgaben ist das Corporate Headquarter Schnittstelle des Konzerns zu weiten Bereichen des Unternehmensumfeldes, insbesondere dem Kapitalmarkt und den Aktionären, der Politik und der interessierten Öffentlichkeit.

Die neue Organisation hat sich erfolgreich bewährt und bereits im ersten Jahr die Wirtschaftlichkeit und die strategische Schlagkraft des Konzerns verbessert; sie hat die Geschäftstätigkeit des Konzerns stärker fokussiert und schlankere, effizientere Strukturen geschaffen. Damit können wir operative sowie strategische Maßnahmen unmittelbarer umsetzen und schneller auf den Markt und die Wünsche der Kunden reagieren.

Seit Gründung 1999 ist die ThyssenKrupp AG eine Aktiengesellschaft nach deutschem Recht mit einem Doppelsitz in Duisburg und Essen. Nach Essen, in das neue ThyssenKrupp Quartier, konnte im Sommer 2010 auch die Verwaltung umziehen, die sich vorher zum größten Teil in Düsseldorf befand. Nach dreijähriger Bauzeit war in Essen der architektonisch anspruchsvolle Campus fertiggestellt worden. Er gehört zu den größten urbanen Büroprojekten, die in den letzten Jahren in Deutschland realisiert wurden. Mit dem Umzug wurde die im Oktober 2009 gestartete Reorganisation der Holding auch räumlich weitgehend abgeschlossen. Die Konzentration der Verwaltung an einem Standort ermöglicht neben beträchtlichen Kostenvorteilen auch eine bessere Kommunikation der Mitarbeiter und kürzere Entscheidungswege.

In Berlin und Brüssel sowie an weiteren 30 Standorten in der Welt hat ThyssenKrupp eigene Konzernrepräsentanten. Sie sind als profunde Kenner des regionalen Marktes wichtige Ansprechpartner für unsere Kunden und Konzernunternehmen.

Der ThyssenKrupp AG gehören direkt oder indirekt etwa 830 Unternehmen und Beteiligungen in rund 80 Ländern. Einzelheiten zu unserem Anteilsbesitz finden Sie auf den Seiten 256–278. Über zwei Drittel der weltweit 2.300 Produktionsstätten, Büros und Servicestützpunkte des Konzerns liegen außerhalb Deutschlands. Der größte unserer mehr als 1.200 Standorte ist Duisburg mit über 17.000 Mitarbeitern. Auf dem zweiten Platz folgt São Paulo, Brasilien, mit mehr als 10.000 und auf dem dritten Dover, USA, mit 6.500 Beschäftigten.

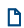

Einzelheiten: Seiten 256–278

### Führungsverantwortung im Konzern

Der Vorstand der ThyssenKrupp AG legt die Strategie für die Konzernentwicklung fest und steuert die konzernweiten Zentralfunktionen sowie die Business Areas. Unter seiner Verantwortung arbeiten auch die Initiativen zum Wertmanagement, mit denen die nachhaltige Entwicklung des Unternehmenswertes optimiert wird. Näheres zu unserer Strategie, zu ThyssenKrupp PLuS und ThyssenKrupp best finden Sie auf den Seiten 91–99. Neben der Ressortverantwortung sind die Vorstandsmitglieder für einzelne Weltregionen zuständig, was die internationale Präsenz des Konzerns fördert. Persönliche Marktkenntnisse sowie spezielles Wissen um Kunden und Kulturen bestimmen diese regionalen Schwerpunkte.

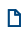

Einzelheiten: Seiten 91–99



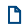

Einzelheiten: Seiten 161–162

Eine wichtige Aufgabe des gesamten Vorstands ist es, herausragende Nachwuchskräfte für die Top-Führungspositionen zu fördern und ihnen zunehmend mehr Verantwortung zu übertragen. Die Nachwuchskräfte sollen neue Erfahrungen in unterschiedlichen Aufgaben und Ländern sammeln, um ihre fachliche wie auch interkulturelle Kompetenz zu stärken. Zur Managemententwicklung und der Aufgabe des Vorstands dabei berichten wir ausführlich auf den Seiten 161–162.

## Erklärung zur Unternehmensführung

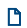

Einzelheiten: Seiten 58–63

Die nach § 289a HGB abzugebende Erklärung zur Unternehmensführung ist im Corporate-Governance-Bericht auf den Seiten 58–63 enthalten. Sie steht auch im Internet unter [www.thyssenkrupp.com/de/investor/kodex-bericht.html](http://www.thyssenkrupp.com/de/investor/kodex-bericht.html) zur Verfügung.

## Vergütungsbericht

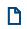

Einzelheiten: Seiten 67–74

Der Vergütungsbericht ist im Corporate-Governance-Bericht auf den Seiten 67–74 enthalten und Bestandteil des Konzernlageberichts.

## Übernahmerechtliche Angaben

Im Folgenden sind die nach § 315 Abs. 4 HGB geforderten übernahmerechtlichen Angaben zum 30. September 2010 dargestellt.

### Zusammensetzung des gezeichneten Kapitals

Das gezeichnete Kapital (Grundkapital) der ThyssenKrupp AG beträgt unverändert 1.317.091.952,64 € und ist in 514.489.044 auf den Inhaber lautende Stückaktien eingeteilt. Jede Aktie gewährt gleiche Rechte und in der Hauptversammlung je eine Stimme.

### 10 % der Stimmrechte überschreitende Kapitalbeteiligungen

Es besteht eine direkte Beteiligung am Kapital der Gesellschaft, die 10 % der Stimmrechte überschreitet: Die Alfried Krupp von Bohlen und Halbach-Stiftung, Essen, hat die ThyssenKrupp AG informiert, dass sie zum 30. September 2010 rund 25,33 % der Stimmrechtsanteile an der ThyssenKrupp AG hält.

### Ernennung und Abberufung der Vorstandsmitglieder, Satzungsänderungen

Die Ernennung und die Abberufung der Mitglieder des Vorstands der ThyssenKrupp AG ergeben sich aus den §§ 84, 85 AktG und § 31 MitbestG in Verbindung mit § 6 der Satzung. Die Änderung der Satzung wird von der Hauptversammlung mit einer Mehrheit von mindestens drei Vierteln des bei der Beschlussfassung vertretenen Grundkapitals beschlossen; die §§ 179 ff. AktG sind anwendbar. Nach § 11 Abs. 9 der Satzung ist der Aufsichtsrat ermächtigt, Satzungsänderungen, die nur die Fassung betreffen, zu beschließen. Der Aufsichtsrat ist ferner ermächtigt, die Fassung des § 5 der Satzung (Grundkapital und Aktien) entsprechend der jeweiligen Ausnutzung des genehmigten Kapitals anzupassen; falls das genehmigte Kapital bis zum 18. Januar 2012 nicht oder nicht vollständig ausgenutzt sein sollte, kann er die Fassung des § 5 ebenfalls anpassen.



### Befugnisse des Vorstands zur Aktienaussgabe

Gemäß § 5 Abs. 5 der Satzung ist der Vorstand ermächtigt, das Grundkapital der Gesellschaft bis zum 18. Januar 2012 mit Zustimmung des Aufsichtsrats um bis zu 500 Mio € durch Ausgabe von bis zu 195.312.500 neuen, auf den Inhaber lautenden Stückaktien gegen Bar- und/oder Sacheinlagen einmal oder mehrmals zu erhöhen (genehmigtes Kapital).

Er kann das Bezugsrecht der Aktionäre mit Zustimmung des Aufsichtsrats in folgenden Fällen ausschließen:

- für Spitzenbeträge, die sich auf Grund des Bezugsverhältnisses ergeben;
- um Inhabern von im Zeitpunkt der Ausübung des genehmigten Kapitals umlaufenden Wandel- und/oder Optionsrechten bzw. einer Wandlungspflicht aus von der Gesellschaft oder ihren Konzernunternehmen bereits begebenen oder künftig zu begebenden Wandel- und/oder Optionsschuldverschreibungen ein Bezugsrecht auf neue Aktien in dem Umfang einzuräumen, wie es ihnen nach Ausübung der Wandel- und/oder Optionsrechte bzw. nach Erfüllung einer Wandlungspflicht als Aktionären zustehen würde;
- wenn der Ausgabepreis der neuen Aktien den Börsenpreis der bereits börsennotierten Aktien zum Zeitpunkt der endgültigen Festlegung des Ausgabepreises nicht wesentlich unterschreitet und die ausgegebenen Aktien insgesamt 10 % des Grundkapitals weder im Zeitpunkt des Wirksamwerdens noch im Zeitpunkt der Ausübung dieser Ermächtigung überschreiten;
- bei Kapitalerhöhungen gegen Sacheinlagen.

Auf die Kapitalgrenze von 10 % ist die Veräußerung eigener Aktien anzurechnen, sofern sie während der Laufzeit dieser Ermächtigung unter Ausschluss des Bezugsrechts gemäß § 186 Abs. 3 Satz 4 AktG erfolgt. Aktien, die zur Bedienung von Schuldverschreibungen mit Wandlungs- und/oder Optionsrechten bzw. einer Wandlungspflicht ausgegeben werden bzw. auszugeben sind, sind ebenfalls auf die Kapitalgrenze von 10 % anzurechnen, sofern die Schuldverschreibungen während der Laufzeit dieser Ermächtigung unter Ausschluss des Bezugsrechts in entsprechender Anwendung des § 186 Abs. 3 Satz 4 AktG ausgegeben werden. Der Vorstand ist ermächtigt, mit Zustimmung des Aufsichtsrats den weiteren Inhalt und die Bedingungen der Aktienaussgabe festzulegen.

### Befugnisse des Vorstands zum Aktienrückkauf

Mit Beschluss der Hauptversammlung vom 21. Januar 2010 wurde die Gesellschaft bis zum 20. Januar 2015 ermächtigt, eigene Aktien bis zu 10 % des zum Zeitpunkt der Beschlussfassung bestehenden Grundkapitals in Höhe von 1.317.091.952,64 € zu erwerben. Die Ermächtigung kann ganz oder in Teilbeträgen, einmal oder mehrmals, zu einem oder zu mehreren Zwecken durch die Gesellschaft oder durch Dritte für Rechnung der Gesellschaft ausgeübt werden. Der Erwerb erfolgt nach Wahl des Vorstands über die Börse oder mittels eines öffentlichen Kaufangebots bzw. mittels einer öffentlichen Aufforderung zur Abgabe eines solchen Angebots oder unter Einsatz von Eigenkapitalderivaten (Put- oder Call-Optionen oder einer Kombination aus beiden). Der für den Erwerb der Aktien gezahlte Gegenwert je Aktie (ohne Erwerbsnebenkosten) darf den am Börsenhandelstag durch die Eröffnungsauktion ermittelten Kurs im Xetra-Handelssystem (oder einem vergleichbaren Nachfolgesystem) um nicht mehr als 5 % über- oder unterschreiten.

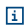

Die von der Hauptversammlung 2010 erteilte Ermächtigung zum Erwerb eigener Aktien gilt bis zum 20. Januar 2015.



Bei einem Erwerb über ein öffentliches Kaufangebot bzw. einer öffentlichen Aufforderung zur Abgabe eines Kaufangebots dürfen der gebotene Kaufpreis oder die Grenzwerte der Kaufpreisspanne je Aktie (ohne Erwerbsnebenkosten) den Durchschnitt der Schlusskurse im Xetra-Handelssystem (oder einem vergleichbaren Nachfolgesystem) an den drei Börsenhandelstagen vor dem Tag der Veröffentlichung des Angebots bzw. der öffentlichen Aufforderung zur Angebotsabgabe um nicht mehr als 10 % über- oder unterschreiten.

Ergeben sich nach der Veröffentlichung eines Kaufangebots bzw. der öffentlichen Aufforderung zur Angebotsabgabe erhebliche Abweichungen des maßgeblichen Kurses, kann das Angebot bzw. die Aufforderung zur Angebotsabgabe angepasst werden. In diesem Fall wird auf den Durchschnittskurs der drei Börsenhandelstage vor der Veröffentlichung einer etwaigen Anpassung abgestellt. Das Kaufangebot bzw. die Aufforderung zur Angebotsabgabe kann weitere Bedingungen vorsehen. Wenn das Kaufangebot überzeichnet ist oder wenn im Fall einer Aufforderung zur Angebotsabgabe von mehreren gleichwertigen Angeboten nicht sämtliche angenommen werden, muss die Annahme nach Quoten erfolgen. Eine bevorrechtigte Annahme geringer Stückzahlen bis zu 100 Stück zum Erwerb angebotener Aktien je Aktionär kann vorgesehen werden.

Bei Erwerb eigener Aktien mittels Eigenkapitalderivaten dürfen Optionen nur mit Aktien bedient werden, die unter Wahrung der Gleichbehandlungsgrundsätze erworben wurden. Die Laufzeit der Optionen muss spätestens am 20. Januar 2015 enden. Jeder Erwerb eigener Aktien unter Verwendung von Eigenkapitalderivaten ist dabei auf Aktien im Umfang von höchstens 5 % des zum Zeitpunkt der Beschlussfassung der Hauptversammlung bestehenden Grundkapitals der Gesellschaft beschränkt. Das Recht der Aktionäre, Optionsgeschäfte mit der Gesellschaft abzuschließen, ist in entsprechender Anwendung von § 186 Abs. 3 Satz 4 AktG ausgeschlossen.

Der Vorstand ist ermächtigt, die erworbenen eigenen Aktien zu allen gesetzlich zugelassenen Zwecken zu verwenden; insbesondere kann er die Aktien einziehen, in anderer Weise als über die Börse oder durch ein Angebot an die Aktionäre sowie gegen Sachleistung veräußern, zur Erfüllung von Umtauschrechten aus von der Gesellschaft oder von Konzernunternehmen begebenen Wandelschuldverschreibungen verwenden und an Mitarbeiter der Gesellschaft und mit ihr verbundener Unternehmen sowie an Mitglieder der Geschäftsführung verbundener Unternehmen ausgeben und zur Bedienung von Rechten auf Erwerb oder Pflichten zum Erwerb von Aktien der Gesellschaft, die dem vorgenannten Personenkreis eingeräumt wurden, verwenden. Der Aufsichtsrat ist ermächtigt, die erworbenen eigenen Aktien zur Bedienung von Rechten auf Erwerb oder Pflichten zum Erwerb von Aktien der Gesellschaft zu verwenden, die Mitgliedern des Vorstands der Gesellschaft eingeräumt wurden. In den fünf letztgenannten Fällen ist das Bezugsrecht der Aktionäre ausgeschlossen. Der Aufsichtsrat kann bestimmen, dass Maßnahmen des Vorstands auf Grund dieser Ermächtigung zum Erwerb und zur Verwendung eigener Aktien nur mit seiner Zustimmung vorgenommen werden dürfen.

Mit Beschluss der Hauptversammlung vom 23. Januar 2009 wurde der Vorstand bis zum 22. Januar 2014 ermächtigt, mit Zustimmung des Aufsichtsrats folgende Maßnahmen zu ergreifen:

- auf den Inhaber lautende Schuldverschreibungen im Gesamtnennbetrag von bis zu 2 Mrd € zu begeben und den Inhabern von Schuldverschreibungen Umtauschrechte auf bis zu 50 Mio eigene, auf den Inhaber lautende Stückaktien der ThyssenKrupp AG mit einem anteiligen rechnerischen Betrag am Grundkapital von bis zu 128 Mio € zu gewähren (Wandelschuldverschreibungen);
- das Bezugsrecht der Aktionäre auf die Wandelschuldverschreibungen auszuschließen, und zwar (1) für Spitzenbeträge, die sich auf Grund des Bezugsverhältnisses ergeben, (2) sofern die Wandelschuldverschreibungen gegen Barzahlung ausgegeben werden und auch der Ausgabepreis für die Wandelschuldverschreibungen den nach anerkannten finanzmathematischen Methoden ermittelten theoretischen Marktwert nicht wesentlich unterschreitet oder (3) zur Gewährung eines Bezugsrechts

#### 1

Die erworbenen eigenen Aktien können zu allen gesetzlich zugelassenen Zwecken verwendet werden.



an Inhaber von Wandlungsrechten aus begebenen Schuldverschreibungen in dem Umfang, wie es ihnen nach Ausübung des Wandlungsrechts zustehen würde. Der Wandlungspreis für eigene Aktien darf 80 % des Durchschnitts nicht unterschreiten, der sich errechnet aus den Schlusskursen im Xetra-Handelssystem an den drei Börsenhandelstagen vor dem Tag der öffentlichen Ankündigung eines Angebots zur Zeichnung von Wandelschuldverschreibungen bzw. vor Abgabe der Annahmeerklärung durch die Gesellschaft nach einer öffentlichen Aufforderung zur Abgabe von Zeichnungsangeboten. Der Vorstand legt die Bedingungen für das Wandlungsrecht fest.

#### **Wesentliche konditionierte Vereinbarungen der Gesellschaft**

Die ThyssenKrupp AG ist Vertragspartei folgender Vereinbarungen, die bestimmte Bedingungen für den Fall eines Kontrollwechsels infolge eines Übernahmeangebots beinhalten:

- Die Gesellschaft hat mit einem Bankenkonsortium einen Vertrag über eine fest zugesagte Kreditlinie in Höhe von 2,5 Mrd € abgeschlossen. Dieser Vertrag kann mit sofortiger Wirkung gekündigt und alle ausstehenden Kreditziehungen können fällig gestellt werden, wenn die Gesellschaft eine Tochtergesellschaft einer anderen juristischen oder natürlichen Person wird und dies von einer Bankengruppe, die mehr als 50 % der Kreditlinie repräsentiert, verlangt wird. In Anspruch genommene Kreditbeträge müssten dann sofort getilgt werden; für neue Inanspruchnahmen stünde die Kreditlinie nicht mehr zur Verfügung.
- Die Gesellschaft hat mit der European Investment Bank, Luxemburg, einen Vertrag über ein Förderdarlehen in Höhe von 210 Mio € abgeschlossen. Dieser Vertrag kann mit sofortiger Wirkung gekündigt werden, wenn eine oder mehrere Personen (außer der Alfred Krupp von Bohlen und Halbach-Stiftung) in Abstimmung untereinander mittelbar oder unmittelbar die Kontrolle über die Gesellschaft erlangen (Kontrollwechsel). Dabei ist unter Kontrolle das Recht zu verstehen, durch Eigentümerschaft am stimmberechtigten Kapital, auf Grund Vertrag oder auf andere Weise die Unternehmensführung und -politik der Gesellschaft bestimmen zu können. Im Falle einer Kündigung auf Grund eines Kontrollwechsels ist das Darlehen zu einem von der European Investment Bank festgelegten Termin, jedoch nicht früher als 30 Tage nach der Kündigung, zurückzuzahlen.
- Die Gesellschaft hat im Geschäftsjahr 2008/2009 eine Anleihe im Volumen von 1 Mrd € begeben sowie eine Privatplatzierung über 100 Mio € durchgeführt. Sie ist des Weiteren Garantin der 2008/2009 begebenen weiteren Anleihen ihrer Tochtergesellschaft ThyssenKrupp Finance Nederland B.V. im Volumen von insgesamt 2 Mrd €. Ein Kontrollwechsel, das heißt Erwerb von mehr als 50 % des Grundkapitals bzw. mehr als 50 % der stimmberechtigten Aktien der ThyssenKrupp AG durch einen Dritten, kann unter bestimmten Voraussetzungen zur vorzeitigen Tilgung der Rückzahlungsbeträge einschließlich Zinsen führen.
- Die Gesellschaft ist Partei einer Gesellschaftervereinbarung bezüglich der Atlas Elektronik GmbH (Joint Venture), die eine Call-Option zugunsten des Mitgeschafters EADS Deutschland GmbH auf bestimmte Vermögenswerte und Verbindlichkeiten des Joint Ventures zum Marktpreis für den Fall vorsieht, dass ein Wettbewerber des Joint Ventures oder des Mitgeschafters direkt oder indirekt ein „controlling interest“ an der Gesellschaft erwirbt. Wird die Call-Option ausgeübt, besteht ein Recht auf Übernahme aller Anteile des Mitgeschafters am Joint Venture durch die ThyssenKrupp Technologies AG (heute firmierend als ThyssenKrupp Technologies Beteiligungen GmbH) zum Marktpreis plus 5 % Aufschlag. Wird die Call-Option nicht ausgeübt, hat der Mitgeschafter seinerseits eine Put-Option auf die Anteile des Joint Ventures zu den genannten Kaufpreiskonditionen.



# Unternehmenssteuerung – Ziele und Strategie

Neue Märkte und neue Technologien bilden zentrale Schlüssel unserer Vorwärtsstrategie. Mit ständig optimiertem Portfolio und immer höherer Effizienz wollen wir uns und unseren Kunden hierbei neue Perspektiven erschließen. Schon heute hat sich die Neuorganisation des Konzerns bewährt und zusätzliche Durchsetzungskraft gebracht. Wir haben die Wirtschafts- und Finanzkrise als Chance genutzt.

## Strategische Perspektiven

ThyssenKrupp ist ein integrierter Werkstoff- und Technologiekonzern. Seine beiden Divisions Materials und Technologies bilden die inhaltliche Klammer um die acht Business Areas, in denen sich die Kompetenzfelder des ThyssenKrupp Konzerns widerspiegeln.

### Krise als Chance genutzt

Die Auswirkungen der weltweiten Wirtschafts- und Finanzkrise haben die Entwicklung von ThyssenKrupp stark beeinträchtigt. Allerdings haben wir uns schnell auf die veränderten Rahmenbedingungen eingestellt und ein konsequentes Maßnahmenprogramm realisiert. Deshalb geht ThyssenKrupp gestärkt aus der Krise hervor.

- Unsere zahlreichen Effizienzsteigerungs- und Restrukturierungsmaßnahmen hatten bereits 2008/2009 nachhaltige Kosteneinsparungen in Höhe von rund 0,8 Mrd € erzielt. Im Berichtsjahr konnten wir diesen Wert weiter auf rund 1,5 Mrd € steigern.
- Die mit Beginn des Berichtsjahres neu eingeführte Konzernorganisation hat die Weichen für eine straffere Führung und höhere Schlagkraft gestellt und orientiert sich an der Leitlinie, strategisch zentraler und operativ dezentraler zu führen. Schon jetzt zeigt sich, dass die schlankeren und effizienteren Strukturen uns ermöglichen, marktnäher zu agieren und strategische wie operative Maßnahmen unmittelbarer umzusetzen.

Wir haben die Umsetzung der strategischen Projekte in Brasilien und den USA flexibel angepasst.

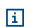

Die neue Konzernorganisation hat sich bewährt.



### Strategische Handlungsfelder definiert

Im Zuge der erwarteten wirtschaftlichen Erholung kehrt der Konzern auf seinen ursprünglichen Entwicklungspfad zurück. Hierzu engagiert sich ThyssenKrupp auf vier strategischen Handlungsfeldern:

**Neue Märkte:** Die Internationalisierung des Konzerns geht konsequent weiter. Schwerpunkte bilden derzeit die Großprojekte im Stahl- und Edelstahlbereich. Darüber hinaus wollen wir die Geschäftsaktivitäten in dynamischen Märkten, vor allem in China und Indien, ausweiten. Ein erfolgreiches Beispiel dafür ist der aktive Ausbau des Elevator-Geschäfts in diesen Regionen.

**Neue Technologien:** Als wesentlichen Schwerpunkt aller Konzernaktivitäten werden wir die Bereiche Innovationen und Technologie stärken, weil sie für ThyssenKrupp eine wichtige Basis für den zukünftigen Erfolg bilden. Dazu wurden verschiedene Bausteine definiert, die das „ThyssenKrupp House of Innovation“ bilden. Mehr dazu können Sie im Kapitel Innovationen auf den Seiten 146–151 lesen.

**Portfoliooptimierung:** Das Konzernportfolio wird nach wertorientierten Kriterien gesteuert. Im abgelaufenen Geschäftsjahr haben wir im Rahmen dieses aktiven Portfoliomanagements insbesondere Aktivitäten im Schiffbau und Industriedienstleistungsgeschäft veräußert. Auch in Zukunft wird der Konzern zum einen sein Portfolio durch gezielte Desinvestitionen optimieren und zum anderen strategische Wachstumschancen über Akquisitionen nutzen. Einzelheiten zu Unternehmenskäufen und -verkäufen finden Sie auf den Seiten 108–109.

**Organisationsentwicklung:** ThyssenKrupp hat das erste Geschäftsjahr in der neuen Konzernstruktur erfolgreich abgeschlossen. Die Gliederung des Konzerns in acht Business Areas ermöglicht es, ihn direkter zu steuern; außerdem sind die Berichtswege kürzer. In der Praxis hat sich die neue Struktur bereits bewährt. Die Zusammenführung der Verwaltungen im neuen ThyssenKrupp Quartier in Essen hat die internen Strukturen und Abläufe wesentlich verbessert und zur Konzernkultur beigetragen. Auch in Zukunft werden wir daran arbeiten, die Organisation des Konzerns zukunftsorientiert weiterzuentwickeln.

### Strategische Großprojekte in Umsetzung

ThyssenKrupp setzt mit anspruchsvollen Konzepten auf profitables Wachstum in internationalen Zukunftsmärkten. Ein wichtiger Schwerpunkt ist dabei der Ausbau des Kerngeschäfts Qualitätsflachstahl mit Großinvestitionen in Brasilien und Alabama/USA. Der Flachstahlmarkt im Nafta-Raum zeichnet sich durch ein großes, langfristig wachsendes Hochwertsegment aus. Ziel ist es, die weltweite Top-Position im Markt für hochwertigen Qualitätsflachstahl nicht nur zu behaupten, sondern auszubauen. Die neuen Werke gehören zur Business Area Steel Americas. Beide Werke haben im 4. Quartal 2009/2010 mit der Produktion begonnen. Nähere Einzelheiten zum Start der Werke finden Sie auf den Seiten 120–121.

Außerdem werden wir unsere Position als global aufgestellter Edelstahlproduzent ausbauen. Dazu entsteht ebenfalls in Alabama/USA ein neues Werk, dessen erste Walzanlagen im September 2010 angelaufen sind. Weitere Aggregate folgen schrittweise. Mit dem neuen Werk der Business Area Stainless Global stärken wir das weitere Erschließen des Nafta-Marktes. Das Projekt wird im Einzelnen auf Seite 123 dargestellt.

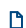

Einzelheiten: Seiten 146–151



Einzelheiten: Seiten 108–109

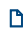

Einzelheiten: Seiten 120–121

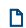

Einzelheiten: Seite 123



## Unternehmenssteuerung durch wertorientiertes Management

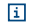

Wir wollen den Unternehmenswert systematisch und kontinuierlich steigern.

Zur Führung und Steuerung des Konzerns setzen wir ein wertorientiertes Managementsystem ein. Unser Ziel ist dabei, den Unternehmenswert systematisch und kontinuierlich zu steigern – durch wertsteigerndes Wachstum und Konzentration auf Geschäftsfelder, die hinsichtlich ihrer Wettbewerbsposition und Leistungsfähigkeit die besten Entwicklungschancen bieten. Zu den wichtigen Elementen dieses Managementsystems zählen ein integriertes Controllingkonzept, wertorientierte Kennzahlen zur Steuerung sowie umfassende Maßnahmen mit den Hebeln wertsteigerndes Wachstum, Effizienzsteigerung und optimierte Kapitalbindung.

### Integriertes Controllingkonzept gewährleistet konzernweite Transparenz

Mit unserem integrierten Controllingkonzept steuern und koordinieren wir die Aktivitäten aller Konzernbereiche. Es unterstützt die dezentrale operative Verantwortung, gewährleistet eine konzernweite Transparenz und zielt darauf ab, den Unternehmenswert durch die Überbrückung operativer und strategischer Lücken zwischen dem Ist-Zustand und einem wettbewerbsorientierten Zielanspruch zu steigern. Qualitativ hochwertige Berichterstattungssysteme für Ist- und Planungsrechnungen verknüpfen zeitnah strategische und operative Elemente; eine regelmäßige, maßnahmenorientierte Kommunikation ergänzt diese Berichte. Alle Managementprozesse orientieren sich an den Steuerungskennzahlen des wertorientierten Managements, die als Messgrößen für den wirtschaftlichen Erfolg auch Bestandteile der variablen Vergütungskomponenten für die verantwortlichen Führungskräfte sind.

### ThyssenKrupp Value Added: Wertorientierte Konzernsteuerungsgröße

Die zentrale Steuerungskennzahl für unser wertorientiertes Management ist der ThyssenKrupp Value Added (TKVA), der den in einer Periode geschaffenen Wert auf allen Ebenen des Konzerns misst. Er errechnet sich aus dem Ergebnis vor Steuern und Zinsen (EBIT) abzüglich der Kapitalkosten. Die Kapitalkosten repräsentieren die Renditeerwartungen für das Eigen- und das Fremdkapital. Sie entsprechen dem Produkt aus dem gewichteten durchschnittlichen Kapitalkostensatz (Weighted Average Cost of Capital, WACC) und dem durchschnittlich gebundenen Kapital (Capital Employed, CE). Das Capital Employed ist definiert als investiertes Anlagevermögen zuzüglich des Net Working Capital und stellt das im operativen Geschäft gebundene Kapital dar.

#### BERECHNUNG DES THYSSENKRUPP VALUE ADDED (TKVA)

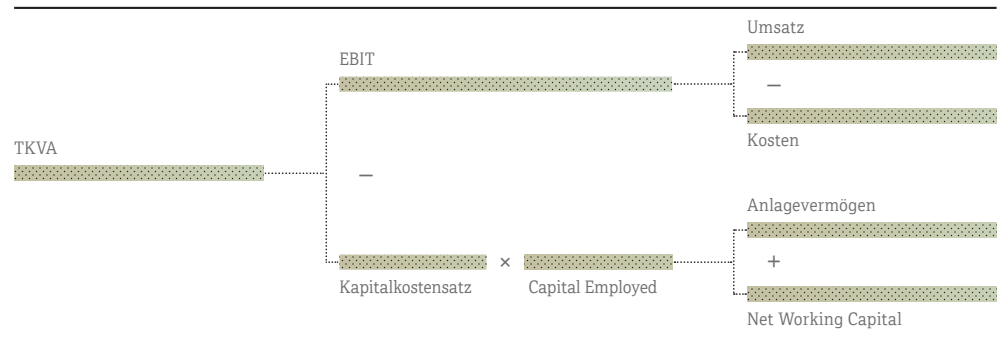



WACC als der gewichtete durchschnittliche Kapitalkostensatz ist der Mindestverzinsungsanspruch unserer Kapitalgeber. Er wird auf Vorsteuerbasis ermittelt und setzt sich aus dem gewichteten Eigen- und Fremdkapitalkostensatz sowie dem Zinssatz für Pensionsrückstellungen zusammen:

- Der Eigenkapitalkostensatz unseres Konzerns orientiert sich am Ertrag aus einer risikolosen Alternativanlage zuzüglich einer Marktrisikoprämie, wobei das spezifische Risiko von ThyssenKrupp in Relation zum Gesamtmarkt berücksichtigt wird. Der auf dieser Basis berechnete Eigenkapitalkostensatz entspricht einem Kostensatz nach Steuern. Da die Kapitalkosten bei ThyssenKrupp auf Vorsteuerbasis ermittelt werden, wird eine Steuerkorrektur vorgenommen.
- Der Fremdkapitalkostensatz (Kosten für Finanzschulden) ergibt sich aus der Verzinsung einer als risikolos definierten Alternativanlage zuzüglich eines unternehmensspezifischen Risikozuschlags.
- Als Zinssatz für Pensionsrückstellungen wird der gewichtete Fünf-Jahres-Durchschnitt der Diskontierungssätze für rückstellungsfinanzierte Pensionspläne und Gesundheitsfürsorgeverpflichtungen zu Grunde gelegt.

Auf Basis dieser Einflussfaktoren lag der gewichtete durchschnittliche Kapitalkostensatz für den Konzern im Geschäftsjahr 2009/2010 bei 8,5 %. Für die Business Areas wurden spezifische Kapitalkostensätze unterstellt, die die geschäftsspezifischen Risikostrukturen widerspiegeln. Die Kapitalkostensätze für die Business Areas betrugen im Berichtsjahr:

#### KAPITALKOSTENSÄTZE DER BUSINESS AREAS in %

|                             |     |
|-----------------------------|-----|
| Steel Europe .....          | 9,0 |
| Steel Americas .....        | 9,0 |
| Stainless Global .....      | 9,0 |
| Materials Services .....    | 8,5 |
| Elevator Technology .....   | 8,0 |
| Plant Technology .....      | 9,0 |
| Components Technology ..... | 9,0 |
| Marine Systems .....        | 9,0 |

Da sich das wirtschaftliche Umfeld ständig ändert, überprüfen wir die Kapitalkostensätze regelmäßig auf ihre Aktualität, um sie bei Bedarf anzupassen.

#### Hebel des Wertmanagements: Wachstum, Effizienz, Kapitalbindung

Eine Steigerung des TKVA ist über drei Hebel möglich: wertsteigerndes Wachstum, Erhöhung der operativen Effizienz und Optimierung der Kapitalbindung. Einen wesentlichen Beitrag zum wertsteigernden Wachstum und damit zur Steigerung des Unternehmenswertes leisten Investitionsprojekte, die Renditen oberhalb ihrer Kapitalkosten erwirtschaften. Zur Erhöhung der operativen Effizienz hat in den letzten beiden Geschäftsjahren das Maßnahmenprogramm ThyssenKrupp PLuS erheblich beigetragen – insbesondere mit nachhaltigen Maßnahmen zur Kostensenkung. Auch das Wertsteigerungsprogramm ThyssenKrupp best stellte einen sehr wichtigen Baustein dar. Beide Programme sind auf den Seiten 97–99 näher beschrieben. Die Kapitalbindung als dritter Hebel zur Steigerung des TKVA lässt sich dadurch verbessern, dass wir uns aus Geschäftsfeldern zurückziehen, in denen sich z.B. die Kapitalkosten nicht erwirtschaften lassen. Ein anderer Weg sind gezielte Programme zur Mittelfreisetzung, z.B. zur Optimierung des Net Working Capital, also zur Reduzierung des im Unternehmen eingesetzten Capital Employed bei nahezu unverändertem EBIT (Ergebnis vor Steuern und Zinsen). Die nachfolgenden Tabellen zeigen die Entwicklung des TKVA und seiner Komponenten in den letzten beiden Geschäftsjahren:



## KOMponenten des ThyssenKrupp Value Added (TKVA)

|                          | 2008/2009       |                                |             |                           |                      |                 |  |
|--------------------------|-----------------|--------------------------------|-------------|---------------------------|----------------------|-----------------|--|
|                          | EBIT<br>(Mio €) | Capital<br>Employed<br>(Mio €) | ROCE<br>(%) | Kapital-<br>kosten<br>(%) | Spread<br>(%-Punkte) | TKVA<br>(Mio €) |  |
| Konzern                  | - 1.663         | 20.662                         | - 8,1       | 8,5                       | - 16,6               | - 3.419         |  |
| Davon:                   |                 |                                |             |                           |                      |                 |  |
| Steel Europe             | - 134           | 5.864                          | - 2,3       | 9,0                       | - 11,3               | - 662           |  |
| Steel Americas           | - 77            | 3.475                          | - 2,2       | 9,0                       | - 11,2               | - 389           |  |
| Stainless Global         | - 864           | 3.240                          | - 26,7      | 9,0                       | - 35,7               | - 1.156         |  |
| Materials Services       | - 211           | 3.943                          | - 5,4       | 8,5                       | - 13,9               | - 546           |  |
| Elevator Technology      | 571             | 1.555                          | 36,7        | 8,0                       | 28,7                 | 446             |  |
| Plant Technology         | 163             | 1.294                          | 28,8        | 9,0                       | 19,8                 | 256             |  |
| Components<br>Technology | - 396           | 3.011                          | - 13,2      | 9,0                       | - 22,2               | - 667           |  |
| Marine Systems           | - 543           | 409                            | —           | 9,0                       | —                    | - 577           |  |

  

|                          | 2009/2010       |                                |             |                           |                      |                 | Veränderung<br>TKVA<br>(Mio €) |
|--------------------------|-----------------|--------------------------------|-------------|---------------------------|----------------------|-----------------|--------------------------------|
|                          | EBIT<br>(Mio €) | Capital<br>Employed<br>(Mio €) | ROCE<br>(%) | Kapital-<br>kosten<br>(%) | Spread<br>(%-Punkte) | TKVA<br>(Mio €) |                                |
| Konzern                  | 1.787           | 20.590                         | 8,7         | 8,5                       | 0,2                  | 37              | 3.456                          |
| Davon:                   |                 |                                |             |                           |                      |                 |                                |
| Steel Europe             | 709             | 5.236                          | 13,5        | 9,0                       | 4,5                  | 238             | 900                            |
| Steel Americas           | - 145           | 6.256                          | - 2,3       | 9,0                       | - 11,3               | - 708           | - 319                          |
| Stainless Global         | - 51            | 2.975                          | - 1,7       | 9,0                       | - 10,7               | - 318           | 838                            |
| Materials Services       | 462             | 3.051                          | 15,1        | 8,5                       | 6,6                  | 202             | 748                            |
| Elevator Technology      | 578             | 1.356                          | 42,6        | 8,0                       | 34,6                 | 469             | 23                             |
| Plant Technology         | 249             | 1.252                          | 38,4        | 9,0                       | 29,4                 | 368             | 112                            |
| Components<br>Technology | 252             | 2.639                          | 9,6         | 9,0                       | 0,6                  | 15              | 682                            |
| Marine Systems           | 48              | 378                            | 17,3        | 9,0                       | 8,3                  | 31              | 608                            |

## Positiver Wertbeitrag erzielt

Im abgelaufenen Geschäftsjahr hat ThyssenKrupp einen positiven Wertbeitrag erwirtschaftet. Der TKVA – ThyssenKrupp Value Added – betrug 37 Mio €. Im Vorjahr war er mit -3.419 Mio € stark negativ. Für den Turnaround waren zwei Faktoren maßgebend: Das Ergebnis vor Steuern und Zinsen (EBIT) des ThyssenKrupp Konzerns stieg 2009/2010 nach dem Vorjahresverlust von -1.663 Mio € auf 1.787 Mio €, während gleichzeitig das durchschnittlich gebundene Capital Employed nahezu unverändert blieb. Der ROCE erhöhte sich demzufolge auf 8,7 % und lag damit über den für den Konzern relevanten Kapitalkosten von 8,5 %.

Zu dem TKVA des Konzerns haben die einzelnen Business Areas unterschiedlich beigetragen. Bis auf Steel Americas und Stainless Global leisteten 2009/2010 alle Business Areas positive Wertbeiträge. Zum Anstieg der Wertbeiträge hat zum einen die bessere Geschäftslage beigetragen, in deren Folge sich in den Business Areas das EBIT und entsprechend der ROCE erhöhten. Zum anderen wurden die eingeleiteten Restrukturierungsmaßnahmen konsequent umgesetzt. Den höchsten TKVA verzeichnete Elevator Technology mit 469 Mio €. Trotz steigender Umsätze ist es fast überall gelungen, das Capital Employed zu senken. Allein Steel Americas bildete wegen der großen Investitionen in die neuen Werke in Brasilien und den USA eine Ausnahme. Dort stieg das Capital Employed um 2.781 Mio € auf 6.256 Mio €. Da die Werke erst zum Ende des Geschäftsjahres anliefen, stand den Kapitalkosten ein negatives EBIT gegenüber. Als Folge erhöhte sich in dieser Business Area der negative TKVA von -389 Mio € auf -708 Mio €.

Einzelheiten können Sie den Tabellen oben entnehmen.

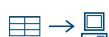



### Portfoliomanagement nutzt Steuerungsgrößen

An das Ergebnis der Analyse der Steuerungsgrößen knüpft unmittelbar unser Portfoliomanagement an. Es handelt sich um strukturelle Maßnahmen mit vorwiegend strategischem Charakter. Die Konzernführung entscheidet, welche Geschäftsfelder ausgebaut werden sollen, um die angestrebten TKVA-Ziele zu realisieren, und aus welchen Aktivitäten wir uns rechtzeitig und wertschonend zurückziehen. Darüber hinaus erschließen wir neue Geschäftsfelder, indem wir effizient in zukunftssträchtige Märkte einsteigen. Alle diese Maßnahmen schaffen eine Grundvoraussetzung für Dividendenfähigkeit sowie für nachhaltiges, wertsteigerndes Wachstum in unseren Kerngeschäftsfeldern.

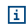

Die Unternehmenssteuerung basiert künftig auf der Ertragskennzahl EBIT.

### Weiterentwicklung des wertorientierten Managements

ThyssenKrupp stellt die Unternehmenssteuerung ab dem Geschäftsjahr 2010/2011 auf die Ertragskennzahl EBIT um, während bisher das EBT die maßgebliche Ertragskennzahl war. Durch die Umstellung richten wir die Steuerung des Konzerns noch konsequenter an den durch das operative Management beeinflussbaren Erfolgsfaktoren aus. Faktoren, die sich nur im Konzernverbund optimieren und beurteilen lassen – insbesondere sind dies das Finanzergebnis und die Steuern – bleiben bei der Beurteilung der operativen Einheiten außer Betracht. Ein weiterer Vorteil einer auf EBIT basierenden Steuerung liegt darin, dass das EBIT die für die TKVA-Ermittlung relevante Erfolgsgröße darstellt. Auf diese Weise sind die operative Steuerung und das Wertmanagement optimal verzahnt.

Im Zusammenhang mit der Einführung der EBIT-Steuerung hat ThyssenKrupp die Definitionen des EBIT und des Capital Employed, ebenfalls beginnend ab dem Geschäftsjahr 2010/2011, angepasst:

Das EBIT enthält künftig nicht mehr diejenigen Bestandteile des Übrigen Finanzergebnisses, die keinen operativen Charakter haben. Hierzu gehört u.a. auch der Ergebniseffekt aus der Aktivierung von Bauzeitinsen. Folglich werden künftig auch die Abschreibungen auf aktivierte Bauzeitinsen nicht mehr Bestandteil des EBIT sein.

Das Capital Employed wird ebenfalls um nicht operative, zins- und steuertragende Bestandteile korrigiert.

Die Anpassung des EBIT und des Capital Employed findet sich auch in der Berichterstattung auf Ebene der Business Areas wieder. Dabei berücksichtigen wir, dass der Erhalt von Anzahlungen insbesondere in den Business Areas mit langfristigen Fertigungsaufträgen ein integraler Bestandteil des Risikomanagements (zur Vermeidung von Ausfallrisiken auf Kundenseite) und damit des operativen Geschäfts ist. Um diese Anzahlungen bzw. die damit erzielbaren Zins- und Finanzierungseffekte adäquat im Wertmanagement zu berücksichtigen, wird das EBIT der entsprechenden Business Areas um einen kalkulatorischen Ergebnisbeitrag erhöht, der sich aus der Verzinsung des durchschnittlichen Nettoanzahlungsüberschusses – d.h. im Wesentlichen die Differenz aus von Kunden erhaltenen und an Zulieferer gewährten Anzahlungen – mit dem WACC der Business Areas ergibt. Analog dazu wird bei den Business Areas das in den TKVA eingehende Capital Employed ebenfalls um die Nettoanzahlungsüberschüsse erweitert. Da die Nettoanzahlungsüberschüsse zwischen den Business Areas verwendet werden, sind die positiven kalkulatorischen Ergebnisbeiträge im EBIT sowie Erhöhungen des Capital Employed auf Ebene des ThyssenKrupp Konzerns in der Konsolidierung wieder zu eliminieren; sie treten damit in den Kennzahlen für den Konzern nicht mehr auf.



## ERTRAGSKENNZAHLEN IM VERGLEICH 2009/2010 in Mio €

|                             | EBT          | EBIT<br>(neue Definition) |
|-----------------------------|--------------|---------------------------|
| Steel Europe                | 639          | 726                       |
| Steel Americas              | – 320        | – 599                     |
| Stainless Global            | – 121        | – 58                      |
| Materials Services          | 411          | 462                       |
| Elevator Technology         | 602          | 645                       |
| Plant Technology            | 308          | 400                       |
| Components Technology       | 220          | 251                       |
| Marine Systems              | 38           | 141                       |
| Corporate/Konsolidierung    | – 642        | – 632                     |
| <b>ThyssenKrupp Konzern</b> | <b>1.135</b> | <b>1.336</b>              |

## ThyssenKrupp PLuS

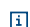

ThyssenKrupp PLuS hat geholfen, den Konzern nachhaltig rentabler zu machen.

## Ergebnis- und Liquiditätsziele erreicht

Zu den Aufgaben des konzernweiten Maßnahmenprogramms ThyssenKrupp PLuS gehört es, positive Ergebniseffekte auf der Kosten- und Absatzseite zu realisieren sowie die Liquidität zu stabilisieren bzw. nach Möglichkeit zu verbessern, um den Finanzierungsbedarf möglichst gering zu halten. Diese Ziele haben wir auch im abgelaufenen Geschäftsjahr erreicht. Unsere Maßnahmen haben nachhaltig die Aufwendungen gesenkt und den Konzern rentabler gemacht.

Der Erfolg unserer Ergebnismaßnahmen spiegelt sich neben anderen Einflussfaktoren im deutlich verbesserten Konzernergebnis wider. So haben wir z.B. die Verwaltungs- sowie die Vertriebskosten des Konzerns weiter reduziert und die Aufwendungen für externe Dienstleister verringert, indem wir vorher extern vergebene Aufgaben wieder zurück in den Konzern holten. Dies erhöhte die eigene Unternehmensleistung und trug zum Ergebnisanstieg bei.

Die Mittelbindung im Netto-Umlaufvermögen – Net Working Capital – ist gegenüber dem vergangenen Geschäftsjahr nur soweit gestiegen, wie es für das wieder besser laufende Geschäft notwendig war. Dazu haben begleitende Maßnahmen beigetragen, mit denen wir die Vorratshaltung effizienter gestalten und das Forderungsmanagement verbesserten.

Bei den Investitionen bewegten wir uns im abgelaufenen Geschäftsjahr durch eine zurückhaltende Vergabe der Mittel in allen Business Areas ebenfalls im Rahmen unserer Auszahlungsziele und konnten unseren langfristigen strategischen Zielen Rechnung tragen.

## ThyssenKrupp best

Den Unternehmenswert für die Aktionäre zu steigern, die Leistungen für die Kunden zu verbessern und Schwachstellen in den betrieblichen Strukturen zu beseitigen – diese Ziele hat ThyssenKrupp best auch 2009/2010 erreicht. Das konzernweite Wertsteigerungsprogramm unterstützt seit neun Jahren den kontinuierlichen Verbesserungsprozess und bietet die dazu nötigen Anleitungen und Werkzeuge.

Das bereits von Beginn an verfolgte Konzept zahlt sich aus: Das Konzernprogramm, das auf Nachhaltigkeit abzielt, in der Organisation fest verankert ist, auf die eigenen Mitarbeiter als Themenexperten, Projektleiter und -mitarbeiter baut, einen breiten methodischen Ansatz verfolgt und den Wissensaustausch zwischen den Projektleitern fordert und fördert, hat sich erneut bewährt. Alle Mitarbeiter können sich an Projekten beteiligen und ihr neu gewonnenes Wissen weitergeben. Allein im abgelaufenen Geschäftsjahr wurden über 1.500 neue Projekte gestartet.



Download der Tabellen unter:  
[http://www.thyssenkrupp.com/financial-reports/09\\_10/de/](http://www.thyssenkrupp.com/financial-reports/09_10/de/)



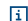

ThyssenKrupp best-Projekte laufen inzwischen in 54 Ländern der Welt.

### Weltweite Erfolgsbilanz

Seit Beginn des Programms im Jahr 2001 hat ThyssenKrupp best den Wert des Konzerns entscheidend gesteigert. Die finanziellen Ergebnisse des Programms im Berichtsjahr lagen auf Rekordniveau: Sie übertrafen alle Werte der bisher neunjährigen Historie von ThyssenKrupp best. Mehrere tausend Mitarbeiterinnen und Mitarbeiter sowie rund 70 Themenexperten haben sich dafür engagiert.

Zum 30. September 2010 umfasste das Programm insgesamt 9.943 Projekte. Hinzu kommen insgesamt 1.801 Projekte aus nicht fortgeführten Aktivitäten. Damit wurde im Berichtsjahr auch das 11.000ste Projekt im Rahmen von ThyssenKrupp best gestartet und in die konzernweit verfügbare Datenbank best plaza zum Wissenstransfer eingestellt.

2009/2010 wurden erneut mehr als 50 % aller Projekte von Konzernunternehmen außerhalb Deutschlands durchgeführt. Unternehmen an mehr als 400 Standorten in inzwischen 54 Ländern haben sich mit eigenen Projekten in das Programm eingebracht. Mit rund 70 % entfielen die meisten Projekte auf Europa, vornehmlich Deutschland, Frankreich, Spanien und Italien. Auf dem amerikanischen Kontinent wurden rund 20 % der weltweiten Projekte realisiert – in den USA, in Kanada, Mexiko, Brasilien und weiteren südamerikanischen Ländern haben sich inzwischen viele erfolgreiche Projektteams gebildet. Auch in China, Südkorea und anderen Ländern des Raums Asien/Pazifik sowie in Afrika starteten erneut Wertsteigerungsvorhaben; sie machen 7 % der best-Projekte aus.

Der Wissenstransfer von einem Konzernunternehmen zum anderen bildet einen wesentlichen Erfolgsfaktor von ThyssenKrupp best. Dabei werden erfolgreiche Projektansätze bereichsübergreifend kommuniziert, überarbeitet und auf andere Unternehmen übertragen. Neben der zentralen internetgestützten Programmplattform best plaza fördern zahlreiche Veranstaltungen auch den direkten Informationsaustausch zwischen den Konzernunternehmen. So haben wir 2009/2010 regionale Treffen von Vertriebsmitarbeitern mehrerer Business Areas organisiert, um den Austausch in den Vertriebsbereichen zu fördern.

THYSSENKRUPP BEST-PROJEKTE\* WELTWEIT am 30.09.

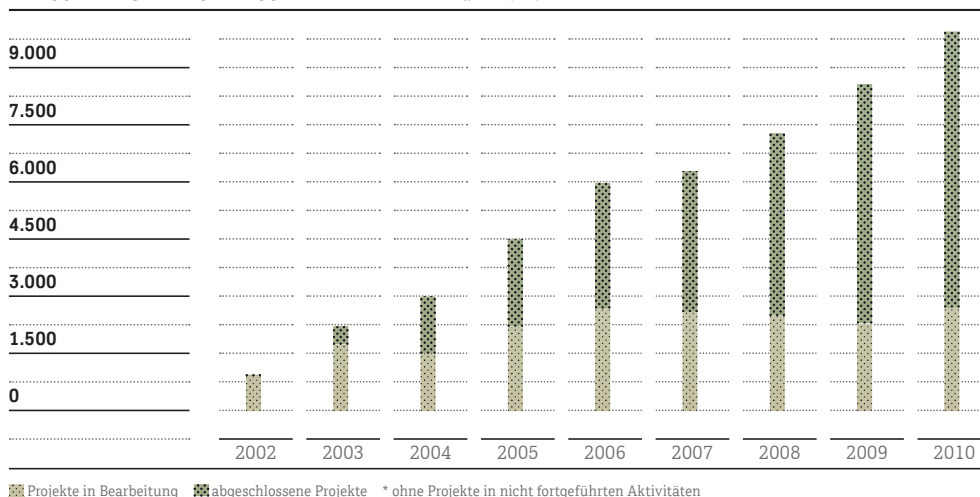

### Initiativen und Schwerpunktthemen

In den Initiativen von ThyssenKrupp best bündeln wir die Ergebnisse und Erfahrungen aus Projekten und stellen die Werkzeuge für die Projektarbeit zur Verfügung. Mehrere Schulungsmodulare vermitteln und vertiefen das notwendige Wissen. Rund 70 Themenexperten treiben zusätzlich als Multiplikatoren die Initiativen in den Business Areas systematisch voran. Sie unterstützen die Konzernunternehmen, Verbesserungspotenziale zu identifizieren und zu nutzen, und fördern den Wissenstransfer innerhalb des Konzerns.



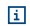

ThyssenKrupp best umfasst zurzeit drei konzernweite Initiativen.

Derzeit umfasst ThyssenKrupp best drei Initiativen: die 2008 gestartete Net Working Capital Initiative, die Sales & Service Initiative aus 2007 sowie die bereits 2005 begonnene Einkaufsinitiative. Alle Initiativen tragen in erheblichem Umfang zum Erfolg von ThyssenKrupp best bei.

Während die Sales & Service Initiative auf Produkte, Kunden, Serviceleistungen sowie die internen Prozesse und Organisationsstrukturen fokussiert ist, stärkt die Einkaufsinitiative die Einkaufsfunktion im gesamten Konzern nachhaltig. Die Net Working Capital Initiative schließlich optimiert die Kapitalbindung in den Forderungen, Verbindlichkeiten sowie Vorräten und fördert das Net Working Capital Management. Damit werden neben der Wertsteigerung auch liquide Mittel freigesetzt.

#### **Six Sigma stärker verankert**

Six Sigma ist eine bewährte Projektmethodik, um in standardisiertem Vorgehen Verbesserungsprojekte durchzuführen. Wir haben deshalb die stärkere Verankerung von Six Sigma im Konzern weiter vorangetrieben. Neben der Ausbildung weiterer Mitarbeiter zu Verbesserungsspezialisten, die nun Business-Area-übergreifend auch durch eigene Trainer erfolgt, haben wir das Programm auch stärker in die Organisation der Konzernunternehmen eingebunden.

#### **ThyssenKrupp best Award 2010**

Im Berichtsjahr erhielten drei Projektteams aus den Business Areas Materials Services, Plant Technology und Steel Europe den traditionellen ThyssenKrupp best Award. Ausschlaggebend für die Auswahl durch die Jury waren die Methodik und Umsetzung der Projekte, ihr Umfang, die Übertragbarkeit auf andere Konzernunternehmen sowie das Projektpotenzial. Der erste Preis ging an ein Team aus der Business Area Materials Services. Seine Mitglieder hatten vier Vertriebsmarken im Bereich Kunststoffe mit 50 Standorten innerhalb Deutschlands zusammengeführt und die flächendeckende Präsenz beibehalten. Die Dienstleistungsaktivitäten durch den Aufbau eines nachhaltigen Service-Konzepts in der Minerals-Industrie erfolgreich auszuweiten, war das Ziel eines Projekts der Business Area Plant Technology; das Team belegte den zweiten Platz. Den dritten Platz errang ein Projektteam aus der Business Area Steel Europe. Es entwickelte ein neuartiges dynamisches Rechenmodell, das die betriebsnotwendigen Richtbestände in der Produktion analytisch herleitet, wodurch die erforderlichen Umlaufbestände nachhaltig sinken.



# Überblick über den Geschäftsverlauf im Konzern

ThyssenKrupp hat 2009/2010 erfolgreich gearbeitet. Dank der konjunkturellen Erholung hat sich die Nachfrage nach unseren Produkten und Dienstleistungen spürbar verbessert. Auftragseingang und Umsatz zeigten wieder eine klare Aufwärtstendenz. Die im Zuge der globalen Wirtschafts- und Finanzkrise frühzeitig eingeleiteten operativen und strukturellen Maßnahmen haben gegriffen. Damit gelang es, wieder positive wirtschaftliche Ergebnisse zu erzielen: Der Konzerngewinn vor Steuern betrug 1.135 Mio €.

## Gesamtwirtschaftliche Rahmenbedingungen

Die Weltwirtschaft hat sich 2010 nach der vorangegangenen tiefen Rezession schneller erholt als noch vor einem Jahr erwartet. Insbesondere im 1. Halbjahr 2010 ist das Welt-Bruttoinlandsprodukt kräftig gewachsen. Impulse kamen dabei von der zum Teil sehr expansiven Geld- und Fiskalpolitik einiger Länder sowie vom kräftig anziehenden Welthandel, von dem insbesondere die deutsche Wirtschaft stark profitieren konnte. Im weiteren Jahresverlauf hat sich der konjunkturelle Aufschwung in vielen Ländern allerdings verlangsamt. Insgesamt dürfte die Weltwirtschaft 2010 – nach einem Rückgang um 1 % im Jahr zuvor – um gut 4 % gewachsen sein.

### Konjunktureller Aufschwung

Die größte Wachstumsdynamik ging 2010 von den Schwellenländern aus. In den meisten Industrieländern verlief der wirtschaftliche Aufschwung spürbar moderater. Nach einem guten Jahresbeginn ist die US-Wirtschaft nur verhalten expandiert. Die Exporte und die Anlageinvestitionen entwickelten sich nach dem Rückgang im Vorjahr wieder positiv. Vom privaten Verbrauch, der Hauptstütze der US-Konjunktur, gingen wegen der anhaltend hohen Arbeitslosigkeit, geringer Einkommenszuwächse und niedriger Immobilienpreise nur moderate Wachstumsimpulse aus. Die japanische Wirtschaft verdankte ihr Wachstum vor allem den stark ausgeweiteten Exporten. Allerdings hat die Yen-Aufwertung die wirtschaftliche Dynamik im Jahresverlauf merklich abgeschwächt.

Im Euroraum blieb die wirtschaftliche Erholung überwiegend zurückhaltend. Positiv trugen der private und staatliche Konsum sowie höhere Exporte zum Wachstum bei, leicht negative Effekte gingen dagegen von den Anlageinvestitionen aus. Insgesamt war die wirtschaftliche Entwicklung im Euroraum gespalten. Länder, die unter einer geplatzten Immobilienpreisblase und sehr hohen Staatsdefiziten litten, wiesen nur niedrige oder sogar negative Wachstumsraten aus. Überdurchschnittlich positiv entwickelte sich dagegen die deutsche Wirtschaft. Im 2. Quartal wurde insbesondere dank höherer Exporte und gestiegener Investitionen das höchste Quartalswachstum seit der Wiedervereinigung erzielt. Wegen dieser hohen Wachstumsdynamik zur Jahresmitte dürfte die deutsche Wirtschaft 2010 trotz einer Abschwächung in der 2. Jahreshälfte insgesamt um mehr als 3 % zugelegt haben.

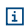

Das Wachstum der deutschen Wirtschaft wird 2010 auf über 3 % geschätzt.



Die aufstrebenden Schwellenländer sind zumeist stark gewachsen. Die chinesische Wirtschaft ist vor allem in der 1. Jahreshälfte wegen hoher staatlicher Investitionen und eines steigenden privaten Verbrauchs kräftig expandiert. Im weiteren Jahresverlauf dürfte die Wachstumsdynamik auf Grund der von der Regierung angestrebten gesamtwirtschaftlichen Abkühlung aber nachgelassen haben. Auch die übrigen großen Schwellenländer – insbesondere Indien und Brasilien – verzeichneten 2010 einen hohen Zuwachs der gesamtwirtschaftlichen Leistung.

#### BRUTTOINLANDSPRODUKT 2010\* reale Veränderung zum Vorjahr in %

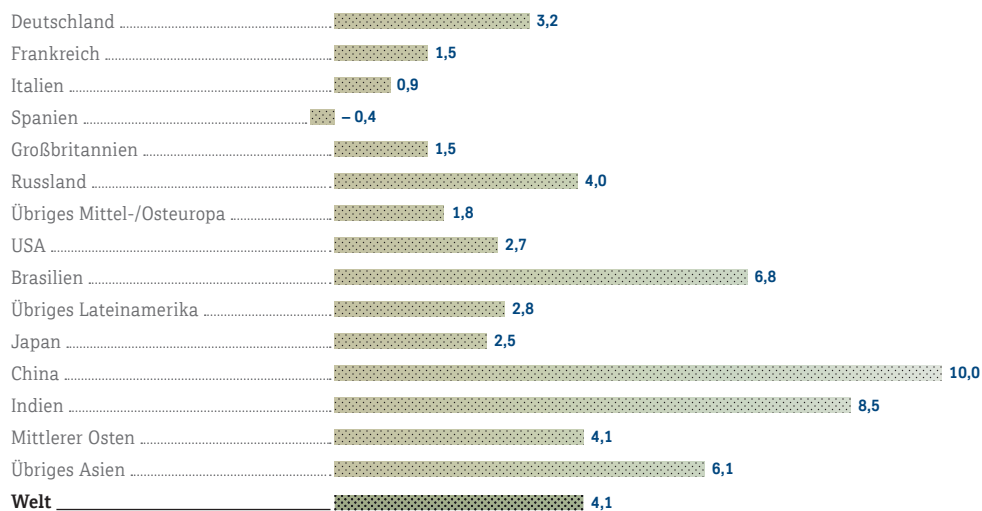

\* Schätzung

## Branchenwirtschaftliche Rahmenbedingungen

Das verbesserte gesamtwirtschaftliche Umfeld hat sich in nahezu allen unseren Märkten positiv ausgewirkt. Die Nachfrage nach Qualitäts- und Edelstahl zog weltweit an. In der Automobilindustrie liefen mehr Fahrzeuge vom Band, zum Teil dank staatlicher Förderprogramme in vielen Ländern. Auch in der Maschinenbauindustrie hat sich die Auftragslage überwiegend gebessert. In der Bauwirtschaft war dagegen das Bild regional sehr differenziert. Trotz der anziehenden Konjunktur in zahlreichen Branchen wurde in den Industrieländern das Produktionsniveau der Vorkrisenzeit allerdings noch nicht wieder erreicht.

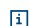

Die globale Rohstahlproduktion stieg 2010 um rund 13 % auf 1,4 Mrd t.

### Qualitätsflachstahlmarkt wieder expansiv

In dem verbesserten gesamtwirtschaftlichen Umfeld hat sich die Stahlnachfrage weltweit stark erhöht. Vor allem in der 1. Kalenderjahreshälfte 2010 lag der weltweite Rohstahlausstoß erheblich über dem niedrigen Vorjahresniveau und erreichte auf monatlicher Basis historische Rekordhöhen. Ab Jahresmitte verminderten sich allerdings die monatlichen Zuwachsraten. Im Gesamtjahr 2010 stieg die globale Produktion um 13 % auf annähernd 1,4 Mrd t – damit wurde der bisherige Rekordschub des Jahres 2007 übertroffen. China und Indien, die ihre Produktion um 10 % bzw. 6 % erhöhten, konnten an den letztjährigen Wachstumstrend anknüpfen. In den übrigen Regionen waren die zum Teil noch deutlicheren Zuwächse die Gegenbewegung zu den drastischen Einbrüchen des Vorjahres. Die EU verzeichnete ein Plus von 19 %, in der Nafta-Region wurden 29 % mehr Rohstahl erzeugt und in Japan 23 % – dennoch wurden die Vorkrisenniveaus noch nicht wieder erreicht. Die deutschen Stahlwerke waren ab Frühjahr



wieder deutlich besser ausgelastet und steigerten ihre Produktion im Gesamtjahr 2010 um 30 % auf 43 Mio t. Sie profitierten in besonderem Maße von der ausgeprägten Exportorientierung ihrer Kunden, insbesondere der Automobilindustrie, und konnten zudem die Stahlexporte beträchtlich ausweiten.

Im Zuge der wieder höheren Stahlnachfrage haben die Stahlspotpreise nach dem vorangegangenen dramatischen Verfall weltweit spürbar angezogen. Die durch die Rohstoffpreisentwicklung drastisch erhöhten Kosten der Stahlerzeugung haben diesen Anstieg wesentlich mit verursacht.

Etwa zur Jahresmitte gab die zuvor sehr hohe globale Stahlnachfrage leicht nach. Dies zeigte sich zunächst in Asien, wo sich insbesondere in China das exzessive Stahlverbrauchswachstum auch auf Grund einer restriktiveren Geldpolitik verlangsamte und die Preise zurückgingen. Aber auch in Nordamerika und zuletzt in Europa gerieten die Stahlmärkte in ruhigeres Fahrwasser, nachdem die positiven Impulse aus dem Lagerzyklus ausgelaufen waren und der reale Stahlverbrauch nur moderat zunahm.

Auch der europäische Qualitätsflachstahlmarkt stand überwiegend im Zeichen einer kräftigen Erholung. Die Ordereingänge der Stahlanbieter zeigten seit dem 4. Quartal 2009 einen deutlichen Aufwärtstrend, schwächten sich dann im Laufe des 2. Quartals 2010 jedoch wieder ab. Der Versand der europäischen Stahlproduzenten in die EU lag im 1. Halbjahr 2010 signifikant über der allerdings sehr niedrigen Vorjahresmenge. Die expansive Nachfrage war zunächst durch den Lagerzyklus bedingt. Im Zuge der konjunkturellen Erholung mussten der Handel und die Endverbraucher ihre während der Rezession stark abgebauten Stahl-Lagerbestände wieder auffüllen. Dies galt gleichermaßen für die Bestände in der weiteren Wertschöpfungskette der Industrie. Bis Jahresmitte hatten sich die Bestandsniveaus normalisiert. Aber auch der Realverbrauch erhöhte sich ab dem Frühjahr zunehmend; positive Impulse aus der Automobilindustrie und vielen Bereichen der Metallverarbeitung wurden teilweise durch die weiterhin rezessive Entwicklung des europäischen Baugewerbes konterkariert. Von der insgesamt aber wieder recht lebhaften positiven Mengenkonjunktur profitierten besonders die europäischen Anbieter; die Stahlimporte aus Drittländern blieben in den ersten acht Monaten auf relativ moderatem Niveau. Dazu dürfte auch der temporär schwächer bewertete Euro beigetragen haben.

In der Tendenz ähnlich war die Entwicklung in Nordamerika. Seit Herbst 2009 belebte sich die Stahlnachfrage wieder, zunächst überwiegend getrieben von notwendigen Lagerergänzungen bei Endverbrauchern und Service-Centern. Im weiteren Verlauf kamen stärkere Impulse vor allem aus der wieder wachsenden Automobilindustrie und dem Energiesektor. Ab dem Frühsommer geriet die Erholung mit abgeschlossener Lagerbereinigung ins Stocken, und das zuvor sehr hohe Nachfragewachstum verringerte sich in der 2. Jahreshälfte.

THYSSENKRUPP UMSATZ NACH KUNDENGRUPPEN 2009/2010 in %

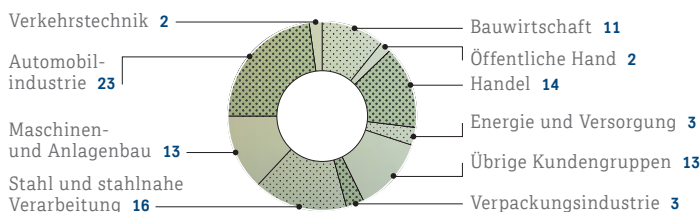

### Edelstahlmarkt erholt

Nach dem vorangegangenen Einbruch in vielen Weltregionen hat sich 2010 die Nachfrage nach rost-, säure- und hitzebeständigen (RSH) Edelstahlflachprodukten weltweit erholt. Nach vorläufigen Schätzungen dürfte die globale Nachfrage um 16 % auf knapp 16 Mio t gestiegen sein. Für den westeuropäischen und nordamerikanischen Markt wird für 2010 eine Zunahme von 22 % bzw. 18 % geschätzt. In China lag das Wachstum voraussichtlich bei 8 %, während die übrigen asiatischen Länder ein Plus von 20 % verzeichnen dürften.

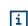

Der europäische Qualitätsflachstahlmarkt erholte sich 2010 kräftig.



Der Auftragseingang der Rostfrei-Produzenten in Europa, Nordamerika und China hat sich zu Beginn des Jahres 2010 deutlich erholt, wozu neben Nachdispositionen des Handels auch ein steigender Bedarf verschiedener Endverbrauchersegmente beitrug. Im weiteren Verlauf gab der Auftragseingang in allen Regionen jedoch nach, was vor allem auf die Entwicklung des Nickelpreises zurückzuführen war. Gegen Ende des Geschäftsjahres stiegen die Bestellungen wieder leicht an.

Die Edelstahlpreise entwickelten sich im Jahresverlauf uneinheitlich. Nachdem die Basispreise und die Legierungszuschläge in Deutschland, Europa und Nordamerika seit Jahresbeginn zunächst zunahmen, gaben sie im weiteren Verlauf wieder nach. Die Preisentwicklung in China verlief ähnlich, wobei der Preisrückgang hier allerdings früher einsetzte. Gegen Ende des 3. Quartals konnte in Europa und China wieder ein leichter Anstieg der Preise beobachtet werden. Der Nickelpreis zeigte seit Jahresbeginn zunächst eine Aufwärtstendenz und lag im April auf dem höchsten Stand seit Mai 2008. Nach einem deutlichen Einbruch stabilisierte er sich zum Ende des Geschäftsjahres bei durchschnittlich ca. 22.000 US-Dollar je Tonne.

Die Nachfrage nach Nickellegierungen hat sich seit Beginn des Jahres verbessert, wobei die Erholung auf Grund der Volatilität der Metallpreise nur zögernd verlief und abhängig von Branche und Region sehr unterschiedlich war. In der für ThyssenKrupp besonders wichtigen Chemiebranche war der Aufschwung zwar noch verhalten, insgesamt zog die Ordertätigkeit zwischenzeitlich aber wieder an.

Der Titanmarkt scheint die Talsohle durchschritten zu haben. Vor allem aus dem Luftfahrtsektor kamen wieder deutlich positive Impulse. Die Luftfahrtshows in Berlin und Farnborough führten zu hohen Auftragseingängen bei den großen Herstellern Boeing und Airbus.

#### Automobilmarkt wieder im Vorwärtsgang

Der internationale Automobilmarkt konnte sich 2010 nach dem starken Einbruch im Jahr zuvor wieder erholen. Weltweit stieg die Produktion nach vorläufigen Schätzungen um 14 % auf knapp 68 Mio Personen- und leichte Nutzfahrzeuge. Mit einem Plus von 23 % auf über 15 Mio Fahrzeuge gehörte China 2010 zu den am kräftigsten wachsenden Märkten. Weltweit nahezu jedes vierte Kraftfahrzeug läuft inzwischen vom Band eines chinesischen Automobilwerks. Zum Teil hohe Zuwächse gab es auch in den übrigen BRIC-Staaten Brasilien, Russland und Indien.

Der nordamerikanische Automobilmarkt hat sich 2010 spürbar belebt. Die Produktion und die Neuwagenverkäufe sind auch nach dem Auslaufen der Verschrottungsprämien gestiegen. In den USA dürfte 2010 die Produktion auf 7,4 Mio Personenkraftwagen und Light Trucks zugenommen haben. Trotz dieses Zuwachses um über 30 % wurde das Vorkrisenniveau nicht erreicht. Die Verlagerung der Automobilproduktion nach Mexiko hat sich auch 2010 fortgesetzt; dort stieg die Produktion um 45 % auf 2,2 Mio Personenkraftwagen und Light Trucks.

Weniger stark nahm die Fahrzeugproduktion in Westeuropa zu. Insgesamt dürfte 2010 die Produktion um 8 % auf 14,2 Mio Personen- und leichte Nutzfahrzeuge gewachsen sein; belastet hat hier vor allem das Auslaufen der Zulassungsprämien in vielen Ländern. Der größte Teil des Zuwachses in Westeuropa ging auf das Konto der Automobilhersteller in Deutschland, die mit einer Stückzahl von 5,7 Mio das Produktionsniveau des Vorjahres um fast 12 % übertroffen haben. Die kräftig gestiegenen Exporte konnten die rückläufigen Neuzulassungen im Inland mehr als ausgleichen. Positiv entwickelte sich auch wieder der Markt für schwere Nutzfahrzeuge.

#### Maschinenbau auf Erholungskurs

Der Maschinenbau war 2010 in vielen Ländern von einer noch geringen Kapazitätsauslastung und einer verhaltenen Investitionsneigung geprägt. Eine wesentliche Ausnahme bildete der chinesische Maschinenbau, der von den staatlichen Konjunkturpaketen profitierte. Japan hat den Einbruch im Vorjahr teilweise aufholen können. Das Wachstum in den USA blieb moderat.

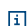

Weltweit wurden 2010 fast 68 Mio Personen- und leichte Nutzfahrzeuge produziert.



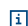

Der deutsche Maschinenbau rechnet 2010 mit einem Produktionsanstieg von 6 %.

In Deutschland verbesserte sich die Auftragslage im Jahresverlauf spürbar. Die Bestellungen vor allem aus dem Ausland, aber auch aus dem Inland zogen kräftig an, so dass die Kapazitätsauslastung seit Jahresmitte 2010 wieder deutlich über 80 % lag. Mit der anziehenden Konjunktur in vielen Schwellenländern hat sich auch die Lage für den deutschen Großanlagenbau verbessert. Relativ verhalten waren dagegen die Auftragseingänge für Aufzüge und Fahrtreppen. Insgesamt sollte der deutsche Maschinenbau 2010 einen Produktionsanstieg von 6 % erzielt haben.

#### Baukonjunktur in den Industrieländern überwiegend schwach

Die Baukonjunktur blieb 2010 in den meisten Industrieländern sehr schwach. In den USA war die Bautätigkeit weiter rückläufig. Trotz der zeitweiligen steuerlichen Erleichterungen beim Hauskauf sank die Nachfrage nach Wohnimmobilien. Auch in Europa gab die Bauproduktion nach. In Deutschland wirkte sich die kalte Witterung zu Jahresbeginn negativ aus. Positiv entwickelte sich dank der Konjunkturpakete der öffentliche Bau, wenngleich die staatliche Baunachfrage an Kraft verlor, da vor allem viele Städte und Gemeinden ihre Investitionspläne vor dem Hintergrund der angespannten kommunalen Finanzsituation zurückgenommen haben dürften. Der Wirtschaftsbau konnte trotz anziehender Aufträge noch nicht einspringen. Daher dürfte die Bauproduktion 2010 insgesamt leicht niedriger ausgefallen sein.

In den Schwellenländern war die Baukonjunktur dagegen aufwärts gerichtet. Die chinesische Bauwirtschaft profitierte dabei stark von staatlichen Konjunkturprogrammen. Kräftig blieb die Baukonjunktur auch in Indien.

## ThyssenKrupp – positive Geschäftsentwicklung

### THYSSENKRUPP IN ZAHLEN

|                      |       | 2008/2009 | 2009/2010 |
|----------------------|-------|-----------|-----------|
| Auftragseingang      | Mio € | 35.970    | 41.250    |
| Umsatz               | Mio € | 40.563    | 42.621    |
| EBITDA               | Mio € | 192       | 3.224     |
| EBIT                 | Mio € | - 1.663   | 1.787     |
| Bereinigtes EBIT     | Mio € | - 375     | 1.682     |
| EBT                  | Mio € | - 2.364   | 1.135     |
| Bereinigtes EBT      | Mio € | - 1.076   | 1.030     |
| Investitionen        | Mio € | 4.079     | 3.513     |
| Mitarbeiter (30.09.) |       | 187.495   | 177.346   |

Die Geschäftsentwicklung von ThyssenKrupp war im Geschäftsjahr 2009/2010 spürbar aufwärts gerichtet. Dank der konjunkturellen Erholung verzeichneten wir eine anziehende Nachfrage nach unseren Produkten und Dienstleistungen. Auftragseingang und Umsatz legten deutlich zu. Nach dem Verlust im Vorjahr wurde ein höherer Gewinn vor Steuern erzielt als noch vor Jahresfrist erwartet. Dazu haben auch erhebliche Effekte aus unseren Kostensenkungsprogrammen beigetragen. Angesichts der erfreulichen Gewinnentwicklung werden Vorstand und Aufsichtsrat der Hauptversammlung im Januar 2011 vorschlagen, je Aktie eine auf 0,45 € erhöhte Dividende auszuzahlen.

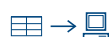

Download der Tabellen unter:  
[http://www.thyssenkrupp.com/financial-reports/09\\_10/de/](http://www.thyssenkrupp.com/financial-reports/09_10/de/)



### Auftragseingang und Umsatz gestiegen

Der Umsatz und insbesondere der Auftragseingang nahmen spürbar zu. Der Auftragseingang stieg im Vergleich zum Vorjahr um 15 % auf fast 41,3 Mrd €. Mit Ausnahme von Marine Systems haben alle Business Areas zu diesem Wachstum beigetragen. Besonders stark war die Nachfrage nach Qualitätsflachstahl und Edelstahl sowie nach industriellen Komponenten.

#### AUFTRAGSEINGANG NACH BUSINESS AREAS in Mio €

|                                           | 2008/2009     | 2009/2010     |
|-------------------------------------------|---------------|---------------|
| Steel Europe                              | 7.892         | 10.986        |
| Steel Americas                            | 0             | 69            |
| Stainless Global                          | 4.147         | 5.121         |
| Materials Services                        | 12.085        | 12.805        |
| Elevator Technology                       | 5.038         | 5.099         |
| Plant Technology                          | 3.538         | 3.859         |
| Components Technology                     | 4.177         | 5.653         |
| Marine Systems                            | 870           | 531           |
| Corporate                                 | 127           | 132           |
| <b>Auftragseingang der Business Areas</b> | <b>37.874</b> | <b>44.255</b> |
| Aufträge zwischen den Business Areas      | - 1.904       | - 3.005       |
| <b>Auftragseingang Konzern</b>            | <b>35.970</b> | <b>41.250</b> |

Der Konzernumsatz verbesserte sich um 5 % auf 42,6 Mrd €. Bei den Werten und abrechnungsbedingt im Anlagenbau war der Umsatz rückläufig; auch bei Werkstoffdienstleistungen sowie Aufzügen und Fahrtreppen wurde das Vorjahresniveau nicht ganz erreicht. Zum Teil kräftige Zuwächse verzeichnete dagegen das Geschäft mit Qualitätsflachstahl, Edelstahl und Komponenten für die Automobilindustrie.

#### UMSATZ NACH BUSINESS AREAS in Mio €

|                                    | 2008/2009     | 2009/2010     |
|------------------------------------|---------------|---------------|
| Steel Europe                       | 9.570         | 10.770        |
| Steel Americas                     | 0             | 68            |
| Stainless Global                   | 4.486         | 5.901         |
| Materials Services                 | 12.815        | 12.763        |
| Elevator Technology                | 5.308         | 5.188         |
| Plant Technology                   | 4.450         | 3.931         |
| Components Technology              | 4.603         | 5.724         |
| Marine Systems                     | 1.594         | 1.211         |
| Corporate                          | 127           | 131           |
| <b>Umsatz der Business Areas</b>   | <b>42.953</b> | <b>45.687</b> |
| Umsatz zwischen den Business Areas | - 2.390       | - 3.066       |
| <b>Umsatz Konzern</b>              | <b>40.563</b> | <b>42.621</b> |

### Ergebnis vor Steuern auf 1.135 Mio € erhöht

ThyssenKrupp erzielte 2009/2010 einen Gewinn vor Steuern in Höhe von 1.135 Mio €. Damit lag das Ergebnis über den vor Jahresfrist geäußerten Erwartungen. Gegenüber dem Vorjahr hat sich das EBT um 3.499 Mio € verbessert.

In den Ergebniszahlen des Berichtsjahres sind Sondereffekte in Höhe von 105 Mio € enthalten; Erträgen aus der Veräußerung der Industrial-Services-Bereiche der Business Area Materials Services sowie aus dem Verkauf von Hellenic Shipyards bei der Business Area Marine Systems standen Restrukturierungsaufwendungen bei der Business Area Components Technology und nicht operative Aufwendungen bei Marine Systems gegenüber. Bereinigt lag das EBT des Konzerns bei 1.030 Mio € und damit 2.106 Mio € über dem Vorjahreswert von -1.076 Mio €.





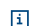

Zum höheren EBT haben 2009/2010 bis auf Steel Americas alle Business Areas beigetragen.

Zum höheren Konzern-EBT haben mit Ausnahme von Steel Americas alle Business Areas beigetragen. Bei Steel Americas fielen bedingt durch den Anlauf der neuen Werke in Brasilien und den USA höhere Verluste an. Auch Stainless Global verzeichnete noch einen Verlust, konnte aber ebenso wie die Business Areas Steel Europe sowie Materials Services das Ergebnis signifikant verbessern. Dies war vor allem auf die höhere mengenmäßige Werkstoffnachfrage zurückzuführen. Während die Preise für Edelstahl stiegen, lagen sie bei Qualitätsflachstahl im Jahresdurchschnitt noch unter dem Vorjahresniveau, was durch den hohen Anteil von Langfristverträgen bedingt ist. Darüber hinaus wurde das EBT im Vorjahr durch erhebliche Bestandsabwertungen belastet, die in diesem Umfang im Berichtsjahr nicht mehr angefallen sind.

Elevator Technology konnte dank der erfreulichen Entwicklung in Asien und des wachsenden Service-Anteils den Gewinn weiter steigern. Auch Plant Technology baute wegen des insgesamt stabilen Geschäftsverlaufs im Anlagenbau den Vorjahresgewinn weiter aus. Components Technology erzielte nach dem Vorjahresverlust wieder einen Gewinn, wozu insbesondere die anziehenden Zulieferungen an die Automobilindustrie beitrugen. Marine Systems hat die Vorjahresverluste erheblich abgebaut und wies nach Berücksichtigung der Sondereffekte ein leicht negatives EBT aus.

In allen Business Areas haben die umgesetzten Restrukturierungs- und Kostensenkungsprogramme die Ergebnisse positiv beeinflusst.

#### EBT NACH BUSINESS AREAS in Mio €

|                       | 2008/2009      | 2009/2010    |
|-----------------------|----------------|--------------|
| Steel Europe          | - 197          | 639          |
| Steel Americas        | - 216          | - 320        |
| Stainless Global      | - 926          | - 121        |
| Materials Services    | - 295          | 411          |
| Elevator Technology   | 570            | 602          |
| Plant Technology      | 236            | 308          |
| Components Technology | - 458          | 220          |
| Marine Systems        | - 554          | 38           |
| Corporate             | - 534          | - 609        |
| Konsolidierung        | 10             | - 33         |
| <b>EBT Konzern</b>    | <b>- 2.364</b> | <b>1.135</b> |

#### BEREINIGTES EBT in Mio €

|                                                          | 2008/2009      | 2009/2010    |
|----------------------------------------------------------|----------------|--------------|
| <b>EBT</b>                                               | <b>- 2.364</b> | <b>1.135</b> |
| +/- Veräußerungsverluste/-gewinne                        | - 1            | - 212        |
| + Restrukturierungsaufwendungen                          | 781            | 46           |
| + Wertminderungsaufwendungen (Impairment-Abschreibungen) | 478            | 3            |
| + Weitere nicht operative Aufwendungen                   | 30             | 58           |
| - Weitere nicht operative Erträge                        | 0              | 0            |
| <b>Bereinigtes EBT</b>                                   | <b>- 1.076</b> | <b>1.030</b> |

Bei dem Bereinigten EBT handelt es sich um ein Ergebnis vor Steuern, das um einmalig bzw. selten auftretende positive oder negative Sondereinflüsse, die in ihrer Art und Höhe ungewöhnlich sowie von wesentlicher Bedeutung sind und damit das Ergebnis der Geschäftstätigkeit überlagern, korrigiert wurde. Zu bereinigende Sondereinflüsse sind Veräußerungsergebnisse, Restrukturierungsaufwendungen, Wertminderungsaufwendungen, weitere nicht operative Aufwendungen sowie weitere nicht operative Erträge.

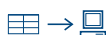



### Komponenten der Ergebnisentwicklung im Konzern

Die Umsatzerlöse lagen im Geschäftsjahr 2009/2010 mit 42.621 Mio € um 2.058 Mio € oder 5 % über dem Vorjahreswert. Trotz der Umsatzerhöhung verringerten sich die Umsatzkosten um 646 Mio € oder 2 %. Hierzu trugen insbesondere stark verminderte Restrukturierungsaufwendungen sowie erheblich gesunkene Vorratsabwertungen und Wertminderungsaufwendungen bei; gegenläufig wirkten höhere Materialaufwendungen als Folge der eingetretenen Umsatz- und Rohstoffpreisstegungen. Das Bruttoergebnis vom Umsatz verbesserte sich erheblich um 74 % auf 6.362 Mio €, verbunden mit einer entsprechenden deutlichen Zunahme der Brutto-Umsatzmarge von 9 % auf 15 %.

Die Abnahme der Vertriebskosten um 151 Mio € resultierte insbesondere aus deutlich verminderten Restrukturierungsaufwendungen. Die allgemeinen Verwaltungskosten lagen als Folge der umgesetzten Kostensenkungsmaßnahmen um 194 Mio € unter dem entsprechenden Vorjahreswert.

Der Anstieg der sonstigen betrieblichen Erträge um 34 Mio € betraf gestiegene Erträge aus Währungsumrechnungen für Vermögenswerte im Zusammenhang mit dem Stahlwerk in Brasilien. Diese Vermögenswerte waren durch entsprechende Bankverbindlichkeiten gesichert; die gegenläufigen Ergebniseffekte aus der Umrechnung dieser Verbindlichkeiten spiegelten sich im sonstigen Finanzergebnis wieder. Gegenläufig wirkten die im Vorjahresbetrag enthaltenen Annullierungen von Währungssicherungen für geplante Rohstoffeinkäufe im Vorjahreszeitraum als Folge der Finanzkrise, die so im Geschäftsjahr 2009/2010 nicht mehr angefallen sind.

Der Anstieg der sonstigen betrieblichen Aufwendungen um 191 Mio € beruhte insbesondere auf nicht aktivierungsfähigen Aufwendungen für noch nicht in Betrieb genommene Aggregate im Zusammenhang mit den Großprojekten in Brasilien und den USA. Zusätzlich wirkten sich Aufwendungen aus Währungsumrechnungen für Investitionsauszahlungen im Zusammenhang mit dem Stahlwerk in Brasilien aus; auch hier ergaben sich auf Grund der ökonomischen Sicherung durch entsprechende Liquiditätsbestände gegenläufige Ergebniseffekte im sonstigen Finanzergebnis.

Der Anstieg des Ergebnisses aus dem Verkauf konsolidierter Unternehmen um 228 Mio € betraf hauptsächlich die Veräußerungen von ThyssenKrupp Industrieservice und ThyssenKrupp Safway in der Business Area Materials Services sowie den Verkauf von Hellenic Shipyards in der Business Area Marine Systems.

Die Verbesserung des Finanzergebnisses um insgesamt 379 Mio € betraf zum einen die Zunahme des Ergebnisses aus nach der Equity-Methode bilanzierten Beteiligungen um 85 Mio € als Folge der im Vergleich zum Vorjahr deutlich verbesserten Ertragslage bei den betreffenden Gesellschaften. Für die darüber hinaus eingetretene Erhöhung des sonstigen Finanzergebnisses um 245 Mio € waren hauptsächlich ein um 49 Mio € verbessertes Kursergebnis aus Finanztransaktionen sowie eine im Vergleich zum Vorjahr um 129 Mio € erhöhte Aktivierung von Bauzeitinsen, die die Errichtung der Stahlwerke in Brasilien und den USA betraf, verantwortlich.

Die Aufwendungen aus Steuern vom Einkommen und vom Ertrag betrugen im Berichtsjahr 208 Mio €; dies entspricht einer Steuerquote von 18 %. Im Vorjahr wurde hier insbesondere auf Grund der negativen Ergebnissituation insgesamt ein Ertrag in Höhe von 491 Mio € ausgewiesen.

Nach Berücksichtigung der Steuern vom Einkommen und vom Ertrag ergab sich gegenüber dem Vorjahr, das einen Jahresfehlbetrag von 1.873 Mio € aufwies, ein um 2.800 Mio € auf 927 Mio € verbesserter Jahresüberschuss.

Unter Einbezug der Jahresergebnisse, die auf nicht beherrschende Anteile entfallen, verbesserte sich das Ergebnis je Aktie für das Geschäftsjahr 2009/2010 nach einem negativen Wert von -4,01 € im Vorjahr erheblich auf einen Gewinn von 1,77 €.

### Bilanzgewinn der ThyssenKrupp AG und Dividende

Die rechtliche Basis für die Ausschüttung bildet der nach HGB ermittelte Bilanzgewinn der ThyssenKrupp AG in Höhe von 415 Mio €; im Vorjahr waren es 154 Mio €. Er setzt sich zusammen

**1**

Das Finanzergebnis stieg 2009/2010 um insgesamt 379 Mio €.



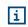

Unser Dividendenvorschlag für 2009/2010 beträgt 0,45 € je Stückaktie.

aus dem nach HGB ermittelten Jahresüberschuss der ThyssenKrupp AG in Höhe von 800 Mio € (i. Vj. Jahresfehlbetrag 882 Mio €) abzüglich der Einstellung in die anderen Gewinnrücklagen in Höhe von 400 Mio € (i. Vj. Entnahme aus den anderen Gewinnrücklagen 438 Mio € und aus der Rücklage für eigene Anteile in Höhe von 532 Mio €) sowie zuzüglich des Gewinnvortrags aus dem Vorjahr in Höhe von 15 Mio €.

Vorstand und Aufsichtsrat schlagen der Hauptversammlung die Zahlung einer Dividende in Höhe von 0,45 € (i. Vj. 0,30 €) je Stückaktie, eine Einstellung in die Gewinnrücklage von 184 Mio € und den Vortrag des darüber hinausgehenden Betrags von 22 Mio € auf neue Rechnung vor. Soweit sich die Anzahl der dividendenberechtigten Aktien bis zum Tag der Hauptversammlung ändern sollte, wird der Gewinnverwendungsvorschlag entsprechend angepasst. Damit ist aus dem Bilanzgewinn von 415 Mio € ein Teilbetrag von insgesamt 209 Mio € zur Ausschüttung auf die zum 30. September 2010 dividendenberechtigten 464.394.337 Aktien vorgesehen.

### Umbau des Portfolios fortgesetzt

Im Berichtsjahr haben wir das Portfolio weiter optimiert, strukturell verbessert und unser Kerngeschäft mit mehreren Transaktionen gestärkt.

In der Business Area Steel Europe stockten wir unseren Anteil an der DOC® Dortmunder Oberflächencentrum GmbH um 24,9 % auf 100 % auf. Das DOC® ist eine wichtige Ideenschmiede für Innovationen, um Stahlbleche entsprechend den Kundenanforderungen zu beschichten. In Italien konnten wir unsere Marktposition bei lasergeschweißten Autoblechen durch die Übernahme des Geschäfts der Euroweld S.r.l. beachtlich stärken.

Die Business Area Materials Services hat im 1. Quartal 2009/2010 mit zwei größeren Desinvestitionen die Fokussierung auf das Roh- und Werkstoffgeschäft mit verbundenen technischen Dienstleistungen umgesetzt. Nach dem Verkauf der ThyssenKrupp Industrieservice GmbH im November 2009 an die WISAG, eine führende deutsche Dienstleistungsgruppe im Facility Management, veräußerten wir im Dezember 2009 den nordamerikanischen Gerüstbauexperten ThyssenKrupp Safway an die amerikanische Private-Equity-Gesellschaft Odyssey Investment Partners. Durch den Abschluss der Übernahme der Thyssen Röhm Kunststoffe GmbH konnte das Kunststoffgeschäft gestärkt und in Deutschland neu strukturiert werden. Die mittel- und südosteuropäischen Werkstoffdienstleistungen haben wir durch den Erwerb der Techno-Stahl Stahlgroßhandel und Brennschneidbetrieb GmbH in Österreich, einem Spezialbetrieb für thermisches Trennen von Blechen und Brammen, ausgebaut.

Die Business Area Elevator Technology führte ihre Wachstumsstrategie mit weiteren Akquisitionen in Europa und im Mittleren Osten fort. Dazu zählte der Erwerb der Atena S.A., einer Tochtergesellschaft der französischen CNIM-Gruppe, was die Aufzugsaktivitäten der Operating Unit Central/Eastern/Northern Europe speziell im Großraum Paris erheblich verstärkte.

In der Business Area Plant Technology sicherte sich Polysius im September 2010 durch die Übernahme der kanadischen UMATAC Industrial Processes Division das technische Know-how für die ATP-Technologie. Diese Technologie wird eingesetzt, um Anlagen zur Ölgewinnung aus Ölschiefer zu planen und zu bauen. UMATAC gehörte bisher zur amerikanischen AECOM Technology-Gruppe.

Bei der Business Area Components Technology haben wir das Portfolio weiter gestrafft. Der Ventilhersteller Definox wird an die schwedische Alfa Laval Corporate AB verkauft, die zu den größten Produzenten von Ventilen für die Konsumgüterindustrie zählt. Ein Kaufvertrag wurde im Juli 2010 unterschrieben und die Transaktion im Oktober 2010 abgeschlossen.

Die Business Area Marine Systems hat den Umbau des Werftengeschäfts weiter vorangebracht und ihre Aktivitäten konsequent auf den Marineschiffbau ausgerichtet. So wurde die Übernahme der Fertigungseinrichtungen der ThyssenKrupp Blohm + Voss Nordseewerke am Standort Emden durch die SIAG Schaaf Industrie AG im Berichtsjahr abgeschlossen.

Im Rahmen der Gründung einer engen strategischen Partnerschaft mit Abu Dhabi MAR, einer internationalen Schiffbaugruppe mit Sitz in Abu Dhabi, wurde die Veräußerung von 100 % an Blohm + Voss Shipyards in Hamburg und jeweils 80 % an Blohm + Voss Repair sowie an Blohm + Voss Industries



vertraglich vereinbart. Weiterhin soll Abu Dhabi MAR die Fertigungseinrichtungen für den zivilen Schiffbau der ehemaligen HDW Gaarden inklusive der Mitarbeiter in Kiel übernehmen. Im Bereich Überwasser-Marineschiffbau schließen wir zusammen mit unserem Partner ein Joint Venture für Design und Projekt-Management. Die Verträge zur strategischen Partnerschaft wurden im April 2010 unterzeichnet. Der Abschluss der Transaktion ist in der 1. Hälfte 2010/2011 geplant.

Bereits realisiert ist der Verkauf von 75,1 % von Hellenic Shipyards an einen der Anteilseigner der Abu Dhabi MAR-Gruppe. Die griechische Werft ist somit im September 2010 aus dem Konsolidierungskreis des Konzerns ausgeschieden. Dieser Verkauf ist Teil einer Gesamtlösung mit der griechischen Regierung und der Abu Dhabi MAR-Gruppe. Sie sieht zudem im Rahmen neuer Vereinbarungen die Abnahme bzw. Fertigstellung der bislang gebauten U-Boote und die Bestellung zwei weiterer U-Boote der Klasse 214 vor. Die entsprechenden Verträge traten Ende Oktober 2010 in Kraft.

Zur Konzentration und zum weiteren Ausbau der maritimen Sicherheitssysteme ist geplant, die Atlas Maritime Security GmbH und die EADS-Tochter Sofrelog S.A.S. in einem Gemeinschaftsunternehmen zu bündeln. Ein entsprechender Joint-Venture-Vertrag wurde im Juni 2010 unterzeichnet.

Seit der Fusion von Thyssen und Krupp haben wir bis zum Ende des Berichtsjahres Unternehmen mit einem Umsatz von 11,0 Mrd € veräußert und solche mit einem Umsatz von 8,8 Mrd € erworben.

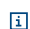

Im Jahresverlauf 2009/2010 ging die Belegschaftszahl um 5 % zurück.

#### Mitarbeiterzahl zuletzt wieder leicht gestiegen

Am 30. September 2010 beschäftigte ThyssenKrupp weltweit 177.346 Mitarbeiter. Damit ist die Zahl im 2. Halbjahr 2009/2010 leicht gestiegen. Gegenüber Ende September 2009 nahm sie allerdings um 10.149 bzw. 5 % ab. Insbesondere in der Business Area Material Services, die größere Unternehmensanteile veräußerte, war die Belegschaftsstärke spürbar rückläufig. Stellenzuwächse gab es dagegen bei Steel Americas sowie bei Elevator Technology und Components Technology.

Besonders stark fiel der Rückgang in Deutschland aus. Hier sank die Mitarbeiterzahl um fast 13 % auf 71.072. Dies lag vor allem an den Desinvestitionen bei Materials Services und Marine Systems. Außerhalb Deutschlands befand sich die Belegschaftszahl auf Vorjahresniveau. Wie sich die Belegschaften auf die einzelnen Regionen in der Welt verteilen, können Sie im Kapitel Mitarbeiter auf Seite 158 nachlesen.

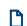

Einzelheiten: Seite 158

Im Jahresverlauf konnten wir die Kurzarbeit nahezu vollständig zurückfahren. Ende September 2010 waren im Konzern weltweit nur noch 2.411 Mitarbeiter von Kurzarbeit betroffen. Der Höchststand lag im April 2009 bei 38.020. In der Business Area Steel Europe, die im April 2009 noch 14.004 Kurzarbeiter zählte, konnte sie nahezu komplett abgebaut werden.

## Absatzmärkte und Marketing

Mit einem Anteil von 62 % am Umsatz war die EU-Region 2009/2010 wieder der wichtigste Absatzmarkt für ThyssenKrupp; davon entfielen 33 Prozentpunkte auf Deutschland. Kunden in Amerika standen für 19 % des Umsatzes, wobei in Nordamerika die USA und in Südamerika Brasilien die wichtigsten Absatzländer waren. Die Bedeutung des asiatisch/pazifischen Raums ist weiter gewachsen, obwohl der Anteil mit 11 % noch relativ gering blieb. Gegenüber den Vorjahren hat sich die regionale Verteilung des Umsatzes kaum verändert.

#### UMSATZ NACH ABSATZGEBIETEN in Mio €

|                  | 2005/2006     | 2006/2007     | 2007/2008     | 2008/2009     | 2009/2010     |
|------------------|---------------|---------------|---------------|---------------|---------------|
| Deutschland      | 15.837        | 18.545        | 19.161        | 13.031        | 13.933        |
| Übrige EU        | 13.293        | 16.198        | 16.677        | 12.142        | 12.485        |
| Amerika          | 11.609        | 10.218        | 9.706         | 7.858         | 8.266         |
| Asien/Pazifik    | 4.123         | 4.146         | 4.852         | 4.341         | 5.013         |
| Übrige Länder    | 2.263         | 2.616         | 3.030         | 3.191         | 2.924         |
| <b>Insgesamt</b> | <b>47.125</b> | <b>51.723</b> | <b>53.426</b> | <b>40.563</b> | <b>42.621</b> |



#### UMSATZ NACH ABSATZGEBIETEN 2009/2010 in %

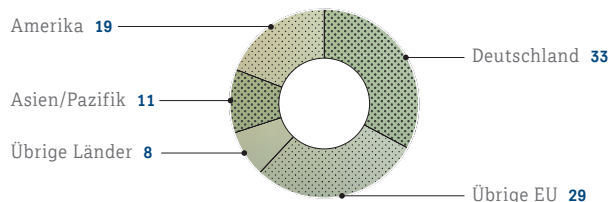

Viele unserer Produkte besitzen auf ihren Märkten eine weltweit führende Position, die dem technischen Vorsprung, der Wirtschaftlichkeit und dem guten Service über die gesamte Lebensdauer der Produkte zu verdanken ist. Darüber hinaus stärken die langjährigen Kunden-/Lieferanten-Beziehungen unsere Marktstellung: Durch gemeinsame Entwicklungsprojekte mit unseren Partnern kennen unsere Ingenieure und Techniker die Anforderungen der Kunden sehr genau und können entsprechend spezifische Problemlösungen anbieten. Dies gilt beispielsweise bei Automobil-Prototypen, für die unsere Werkstoffspezialisten Leichtbaukomponenten entwickeln, wie bei anspruchsvollen Gebäudeprojekten, in denen innovative Aufzüge und Fahrtreppen den Ansprüchen moderner Architektur folgen.

#### Kundennahes Marketing

Zu den Kunden unserer Werkstoffe und Technologiegüter zählen in erster Linie Industrieunternehmen; nur wenige unserer Produkte und Dienstleistungen richten sich an Privatkunden. Diese industriellen Abnehmer erwarten anspruchsvolle Kommunikation, umfassende Information zu Produkt- und Dienstleistungslösungen sowie eine individuelle Beratung, die auf ihre speziellen Anforderungen zugeschnitten ist. Wir nutzen dazu die gesamte Palette der Kommunikationsmöglichkeiten; auch unsere Imagewerbung hat einen hohen Produktbezug. Für Erst- und Folgekontakte nimmt unsere Internetpräsenz eine große Bedeutung ein. Präsentationen und internationale Messebeteiligungen machen auf unsere Leistungspalette aufmerksam und bringen Kunden mit unseren Experten ins Gespräch. Produktbezogene Dokumentationen vermitteln entscheidungsrelevante Daten. Technische Kundenmagazine berichten über neueste Innovationstrends im Konzern. Außerdem entwickeln wir die Produktgestaltung länderspezifisch und kundenbezogen weiter und streben auf unseren Märkten möglichst eine Qualitätsführung an.

Die Marke ThyssenKrupp steht für hohe Ansprüche an die Qualität der Produkte und Dienstleistungen. Unsere operativen Konzernunternehmen treten in einem konzernweit einheitlichen Corporate Design auf. Am Markt aber operieren sie im Rahmen der strategischen Vorgaben selbstständig, so dass sie auf Änderungen der Marktbedingungen und Kundenwünsche flexibel reagieren können. Diese Nähe zum Kunden und die Dienstleistungsorientierung machen wesentliche Merkmale unseres Marketing aus.

#### Investitionen und Netto-Finanzschulden

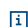

Die Investitionen des Konzerns beliefen sich 2009/2010 auf 3,5 Mrd €.

Im Geschäftsjahr 2009/2010 investierte ThyssenKrupp insgesamt 3.513 Mio €, 566 Mio € weniger als im Vorjahr. Hiervon wurden 3.408 Mio € für Investitionen in Sachanlagen und immaterielle Vermögenswerte ausgegeben; auf den Erwerb von Unternehmen und Beteiligungen sowie auf andere finanzielle Vermögenswerte entfielen die übrigen 105 Mio €. Die Investitionen überschritten die Abschreibungen in Höhe von 1.361 Mio € um 2.152 Mio €.

Die niedrigeren Investitionen beruhten auf der in der Wirtschafts- und Finanzkrise getroffenen Entscheidung, die Mittel vordringlich für die strategischen Wachstumsprojekte in Brasilien und den USA sowie für die Sicherung der Betriebsbereitschaft zu verwenden. Ohne die Großprojekte betrugen die Investitionen 1.459 Mio € gegenüber 1.921 Mio € im Vorjahr.



## INVESTITIONEN NACH BUSINESS AREAS in Mio €

|                              | 2008/2009    | 2009/2010    |
|------------------------------|--------------|--------------|
| Steel Europe                 | 436          | 286          |
| Steel Americas               | 2.135        | 2.054        |
| Stainless Global             | 343          | 344          |
| Materials Services           | 279          | 188          |
| Elevator Technology          | 135          | 81           |
| Plant Technology             | 61           | 32           |
| Components Technology        | 542          | 288          |
| Marine Systems*              | 37           | 8            |
| Corporate                    | 126          | 268          |
| Konsolidierung               | - 15         | - 36         |
| <b>ThyssenKrupp Konzern*</b> | <b>4.079</b> | <b>3.513</b> |

\*Der Vorjahresbetrag wurde auf Grund der Erstanwendung des überarbeiteten IAS 7 angepasst.

Die Investitionen in Brasilien und den USA prägten maßgeblich auch die Entwicklung der Netto-Finanzschulden. Zum Geschäftsjahresende lagen die Netto-Finanzschulden mit 3.780 Mio € um 1.721 Mio € über dem Stand vom 30. September 2009. Mehr erfahren Sie in den Erläuterungen zur Kapitalflussrechnung im Kapitel „Finanz- und Vermögenslage“ auf den Seiten 136–137.

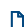

Einzelheiten: Seiten 136–137

## Beschaffung: Bedeutung des Einkaufs steigt

Wegen der gestiegenen Nachfrage im abgelaufenen Geschäftsjahr hat sich auch der Materialaufwand gegenüber dem Vorjahr um 1 % auf 27,1 Mrd € erhöht. Der Anteil am Umsatz ging von 66 % im Vorjahr auf knapp 64 % zurück, obwohl nach Senkungen zu Beginn 2009/2010 die Preise für Rohstoffe und andere Materialgruppen wieder stiegen. Durch unseren weltweiten Einkauf haben wir in Zusammenarbeit mit den Konzernunternehmen günstige Marktbedingungen genutzt und nachhaltige Einsparungen erzielt. Die Materialversorgung unserer Werke war stets sichergestellt; trotz der gestiegenen Nachfrage gab es keine Lieferengpässe. Hierzu tragen auch unsere langfristigen Lieferbeziehungen zu Lieferanten bei. Mit fast einem Drittel unserer Lieferanten arbeiten wir seit mehr als vier Jahren zusammen.

## MATERIALAUFWAND NACH BUSINESS AREAS in Mio €

|                                           | 2008/2009     | 2009/2010     |
|-------------------------------------------|---------------|---------------|
| Steel Europe                              | 6.344         | 6.811         |
| Steel Americas                            | 5             | 116           |
| Stainless Global                          | 4.256         | 4.894         |
| Materials Services                        | 10.106        | 10.101        |
| Elevator Technology                       | 1.768         | 1.687         |
| Plant Technology                          | 2.857         | 2.396         |
| Components Technology                     | 2.827         | 3.437         |
| Marine Systems                            | 1.031         | 602           |
| Corporate                                 | 38            | 56            |
| <b>Materialaufwand der Business Areas</b> | <b>29.232</b> | <b>30.100</b> |
| Konsolidierung                            | - 2.385       | - 2.987       |
| <b>Konzern</b>                            | <b>26.847</b> | <b>27.113</b> |

## Umstellung der Eisenerzpreise auf Quartalsbasis

Die Nachfrage nach Übersee-Eisenerzen ist weiter gestiegen. Dies lag vor allem an der weltweiten Erholung der Stahlproduktion und den zunehmenden Eisenerzimporten der chinesischen Stahlindustrie. Unterstützt durch den starken Nachfrageanstieg zu Beginn des Jahres 2010 ist es den großen Erzlieferanten gelungen, weltweit ein neues Preissystem mit spotmarktbasierten Quartalspreisen durchzusetzen. Als Folge der stark steigenden Preise auf dem Spotmarkt sind die vereinbarten durchschnittlichen Einkaufspreise in den ersten beiden Vertragsquartalen für das Lieferjahr 2010/2011 deutlich gestiegen.



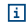

Auch für die Kokskohle gelten  
inzwischen verstärkt Quartalspreise.

Die Eisenerzbezüge der ThyssenKrupp Steel Europe AG lagen im Berichtsjahr mit 17,6 Mio t um rund zwei Drittel oberhalb des sehr stark durch die Krise reduzierten Vorjahresvolumens. Von der Gesamtmenge entfiel mit 11,5 Mio t der größte Teil auf Brasilien, gefolgt von Kanada mit 3,6 Mio t und Afrika mit 1,7 Mio t. Die restlichen Mengen verteilten sich auf Lieferungen aus Australien und Schweden.

Auch ein großer Teil der Kokskohle wird mittlerweile auf Basis von Quartalspreisen abgerechnet. Im Zuge der zu Jahresbeginn einsetzenden Nachfragebelebung mussten für Kokskohle nach der deutlichen Reduzierung im Vorjahr in den beiden ersten Vertragsquartalen für das Lieferjahr 2010/2011 wieder Preiserhöhungen akzeptiert werden. Für Einblaskohle waren ebenfalls höhere Preise hinzunehmen.

Die Nachfrage nach international gehandeltem Hochofenkoks hat sich ebenfalls erholt. Infolgedessen waren die Preise im 1. Halbjahr 2010 auf teilweise 500 US-Dollar je Tonne (fob China) gestiegen; in den Sommermonaten haben sie aber wieder etwas nachgegeben. Das Preisniveau für chinesischen Koks wird nach wie vor stark durch die Exportsteuer von 40 % beeinflusst.

Relativ stabil zeigte sich der Seefrachtenmarkt für die Verschiffung von Eisenerz und Kohle. Selbst für hohe Massengut-Frachtmengen gab es dank der jetzt auf den Markt gekommenen Schiffsneubauten ausreichende Transportkapazität.

### Starke Preisschwankungen bei Legierungsmetallen

Die wirtschaftliche Erholung im Berichtsjahr führte bei Legierungsmetallen zu erhöhter Nachfrage. Die Preise entwickelten sich auch erneut volatil mit steigender Tendenz, ohne jedoch die Schwankungen und Preishöhen des Vorjahres zu verzeichnen. Dies galt beispielsweise für Nickel, Chrom und Molybdän, die als Legierungsmetalle für die Business Area Stainless Global besonders wichtig waren.

Die Schwankungen des Nickelpreises waren teilweise auf Spekulationen zurückzuführen. Die Cash-Notierung an der London Metal Exchange (LME) schwankte zwischen 17.527 US-Dollar im Durchschnitt des 1. Quartals 2009/2010 und 22.476 US-Dollar im 3. Quartal. Im 4. Quartal sank die Notierung dann bis auf 21.188 US-Dollar. Noch stärker bewegten sich die Tagespreise. Die Bandbreite zwischen dem Höchstwert von 27.600 US-Dollar und dem Tiefstwert von 15.810 US-Dollar zeigt die hohe Volatilität, die zunehmend durch spekulierende Marktteilnehmer verursacht wird. So ist beispielsweise der Preis an der LME innerhalb nur eines Monats um 5.840 US-Dollar gestiegen, obwohl im selben Zeitraum der Nickelbestand einen historischen Höchststand erreichte.

Der Referenzpreis für Ferrochrom aus Südafrika blieb in den beiden ersten Quartalen mit 1,03 US-Dollar und 1,01 US-Dollar pro Pound – etwa 0,45 kg – recht stabil, um im 4. Quartal nach zeitweilig noch höheren Preisen 1,30 US-Dollar zu erreichen. Diese Veränderungen erklärten sich aus der Nachfrage und den steigenden Kosten für Energie und Transport im Hauptlieferland Südafrika.

Bei Ferromolybdän stiegen die Quartalsdurchschnittspreise im Laufe des Geschäftsjahres von 28,65 US-Dollar auf 42,05 US-Dollar je Kilogramm. Im letzten Quartal reduzierte sich der Preis auf 39,43 US-Dollar. Die relative Spannweite des Preises über das Jahr war hoch, die kurzfristige Volatilität aber deutlich geringer als bei Nickel. Molybdän wird seit einigen Monaten an der LME notiert. Wegen der fehlenden Akzeptanz der Marktteilnehmer ist diese Notierung aber derzeit für die Marktpreisbildung unbedeutend.

Das an der LME notierte Metall Zink, das bei der Business Area Steel Europe für die Oberflächenveredelung der Stahlbleche eingesetzt wird, zeigte sich ähnlich volatil wie in den Vorjahren. In der 1. Hälfte des Geschäftsjahres wurde es durch die höhere Nachfrage immer teurer, so dass der Durchschnittspreis bei 2.250 US-Dollar je Tonne lag. Nachdem zeitweise stillgelegte Produktionskapazitäten wieder in Betrieb gingen, besserte sich die Angebotssituation im Laufe des 2. Halbjahres. Der Aufwärtstrend wurde dadurch vorerst gebrochen.

Der Kupferpreis lag zu Beginn der Berichtszeit bei 6.017 US-Dollar, stieg bis Mitte Februar 2010 zunächst auf 7.556 US-Dollar je Tonne, um dann wieder auf 6.295 US-Dollar zurückzufallen und anschließend bis Mitte April wieder auf 7.980 US-Dollar zu steigen. Es schloss sich eine Talfahrt auf 6.133 US-Dollar an, gefolgt von einem Anstieg auf 8.033 US-Dollar je Tonne.



Nach dem Einbruch im Vorjahr hat die anziehende Stahlkonjunktur die Nachfrage nach unlegiertem Stahlschrott weltweit wieder steigen lassen. Als Folge erhöhte sich der Preis für die Richtsorte 2 – Neuschrott – in Deutschland von Oktober 2009 bis Mai 2010 von 186 € auf 319 € pro Tonne. Saisonal ging er dann leicht zurück, um sich zum Ende des Geschäftsjahres wieder auf 312 € zu erhöhen. Im Durchschnitt des Berichtsjahres lag der Marktpreis mit 256 € je Tonne um 26 % über dem Vorjahreswert.

#### Höhere Produktpreise durch teurere Rohstoffe

Die im Verlauf des Geschäftsjahres steigenden Rohstoffpreise haben bei den daraus hergestellten Produkten zu höheren Produktpreisen geführt. Stark rohstoff- und stahlpreisabhängige Materialien waren gegenüber dem Vorjahr nur noch zu nennenswert höheren Preisen zu beziehen.

Bei industriellen Dienstleistungen näherte sich das Preisniveau erst im 3. Quartal in ersten kleinen Schritten wieder dem Niveau vor der Krise, in der es zu erheblichen Preisabschlägen gekommen war. Nicht ganz so stark waren Bauleistungen sowie der Maschinen- und Anlagenbau betroffen.

Da die im Laufe des Jahres sehr stark gestiegene Nachfrage teilweise auf geringe Lagerbestände der Vorlieferanten traf, verlängerten sich mitunter die Lieferzeiten. In Teilbereichen führte dies zu stark schwankenden Lieferpreisen. Die Versorgungssicherheit war aber auch bei weiterverarbeiteten Produkten gegeben.

Auf den Beschaffungsmärkten für den Anlagenbau schwankten Preise und Liefersituation im Jahresverlauf ebenfalls deutlich. Zu Beginn des Geschäftsjahres waren die Kapazitäten der europäischen Zulieferindustrie vielfach sehr niedrig ausgelastet, zumal in den Vorjahren die Produktionskapazitäten ausgebaut worden waren. Diese Kapazitäten blieben auch bei zurückgehendem Geschäft im Markt.

#### Neue Einkaufsorganisation

Mit der Neuorganisation des Konzerns hat sich auch die Einkaufsorganisation verändert; es wurde ein deutlich zentralerer Ansatz umgesetzt. Schwerpunkt der zentralen Steuerung ist das Warengruppenmanagement für alle Nichtproduktionsmaterialien und -leistungen im Konzern durch das Corporate Center Materials Management, wobei eng mit allen Konzernunternehmen und den internationalen Landesholdings zusammengearbeitet wird. In Regionen, in denen ThyssenKrupp über viele Konzernunternehmen verfügt – zum Beispiel im Raum Nafta, Europa oder China – unterstützen regionale Gremien diese neue Vorgehensweise. So konnten wir im Geschäftsjahr 2009/2010 schon über 500 Mio € Einkaufsvolumen gebündelt in den Markt vergeben.

Als weitere wesentliche Änderung hat ThyssenKrupp zentral einen IT- und einen Investitionseinkauf aufgebaut. In enger Kooperation mit den Konzernunternehmen konnten wir hierdurch Einsparpotenziale im zweistelligen Millionen-Euro-Bereich realisieren. Auch der Energieeinkauf ist jetzt in das Corporate Center Materials Management eingegliedert. International hat der Energieeinkauf in Zusammenarbeit mit den Konzernunternehmen bereits Erdgas- und Stromverträge für Unternehmen in Italien, Frankreich, und den USA abgeschlossen. Im abgelaufenen Geschäftsjahr konnten wir in der Energiebeschaffung mehr als 30 Mio € einsparen.

#### Intelligente Einkaufssysteme senken Kosten

Erfolgreich arbeiteten ebenfalls unsere Einkaufssysteme. Mit der etablierten ThyssenKrupp Ausschreibungsplattform haben wir im abgelaufenen Geschäftsjahr beispielsweise mehr als 11.300 Ausschreibungen im Markt platziert und durch verstärkten Wettbewerb bessere Konditionen erzielt. Weitere Einsparungen konnten wir dank des verstärkten Einsatzes des Moduls „e.auction“ realisieren.

Die Prozesskosten ließen sich durch den weiteren Ausbau des Katalogbestellsystems reduzieren. Weltweit können heute fast 7.100 Nutzer 5,1 Mio Artikel über das System beziehen.

**i**

In der Energiebeschaffung wurden 2009/2010 über 30 Mio € eingespart.



Das ThyssenKrupp Lieferantenmanagementsystem wurde um einen Auswahlprozess für neue, wichtige Lieferanten erweitert. Insgesamt wurden weltweit knapp 1.300 Lieferantenprojekte mit Unterstützung der Plattform durchgeführt.

#### Mehr Transparenz durch Key Performance Indicators

Für das 2008/2009 aufgebaute Einkaufsreporting- und -controlling-System haben wir konzernweit neun Key Performance Indicators (KPI) definiert. Alle deutschen Unternehmen sind an das System angebunden. Im neuen Geschäftsjahr werden auch die übrigen europäischen und die nordamerikanischen Konzernunternehmen einbezogen. Mit Hilfe der KPI wollen wir die Wirtschaftlichkeit von Prozessen und erzielte Einsparungen im Einkauf transparent machen.

Um den Einkauf kontinuierlich weiterzuentwickeln und die Kompetenz der Mitarbeiter zu erhöhen, fanden weltweit Schulungen in Methoden und Werkzeugen für den Einkauf statt. Insgesamt nahmen 1.200 Mitarbeiter in 23 Ländern daran teil.

Als zentrale und dezentrale Aktivitäten sind im letzten Geschäftsjahr über die ThyssenKrupp best Einkaufsinitiative 323 Projekte neu initiiert worden, die zu Einsparungen in dreistelliger Millionen-Euro-Höhe geführt haben. Ein Beispiel ist das Supply Management Efficiency Program von Elevator Technology, bei dem ein konsequentes globales Warengruppenmanagement nachhaltige Einsparpotenziale identifiziert und umgesetzt. Zu unserem konzernweiten Effizienzsteigerungsprogramm ThyssenKrupp best sind Einzelheiten auf den Seiten 97–99 zu finden.

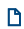

Einzelheiten: Seiten 97–99

#### Steigende Transportkosten

Während zu Beginn des Berichtsjahres bei fast allen Verkehrsträgern die Kapazitäten nur gering ausgelastet waren, änderte sich dies mit Beginn 2010. Die Nachfragebelebung führte sogar zeitweilig zu Versorgungsengpässen. Viele Transportanbieter hatten nämlich Kapazitäten stillgelegt bzw. veräußert und Neuinvestitionen weitgehend eingestellt. Nachdem die geringe Kapazitätsauslastung die Transportpreise zuvor auf dem Niveau des Vorjahres stabilisiert hatte, kam es im LKW-Bereich jetzt zu Preissteigerungen, die jedoch teilweise über Rahmenvereinbarungen oder Langfristverträge abgewendet wurden. Auch bei der Bahn gab es Engpässe, obwohl sie geringer ausfielen als im LKW-Bereich; mäßige Preissteigerungen mussten jedoch akzeptiert werden. Die Preise für LKW- und Container-Spotfrachten sind wegen der Kapazitätsverknappung gestiegen und haben teilweise das Vorkrisenniveau erreicht.

Bei der konventionellen Schifffahrt einschließlich der Binnenschifffahrt war der Frachtraum zu keiner Zeit knapp. Dagegen zeigte der Containerschiffmarkt ein anderes Bild: Schiffsraum wurde künstlich verknappt, indem Abfahrtszeiten verschoben, Destinationen aus dem Verkehr genommen und Fahrzeiten verlängert wurden. Dies führte letztlich zu höheren Preisen.

In der Luftfracht hat die Stilllegung von Flugzeugen ebenfalls die Kapazitäten künstlich niedrig gehalten, um Preiserhöhungen durchzusetzen. Dem haben wir durch Konzernrahmenverträge entgegen gewirkt.

Im Berichtsjahr hat ThyssenKrupp verstärkt das Supply Chain Management entwickelt. Optimierung, Planung und Steuerung von Prozessen wurden entlang der Wertschöpfungskette von den Lieferanten über die Produktion bis hin zu den Kunden neu gestaltet.

## Energie: Günstige Erdgasbezüge

Trotz der international höheren Energienachfrage – bedingt durch das Anziehen der Weltkonjunktur – konnten wir für den Konzern attraktive künftige Bezugspreise für Erdgas und für Teilmengen auch beim Strom erreichen.



### Erdgaspreise in Deutschland im europäischen Vergleich zu hoch

Im Berichtsjahr hat sich der Preis für ein Barrel Rohöl der Brent-Qualität – der international üblichen Vergleichsqualität für Rohöl – in einer Spanne von 67,20 US-Dollar bis 87,59 US-Dollar bewegt.

Zeitweise war das Preisniveau auf dem Erdgasterminmarkt so günstig, dass wir für unsere deutschen Werke langfristige Lieferverträge mit attraktiven Preisen schließen konnten: Gegenüber den Gaspreisen im Berichtsjahr zahlen wir für die Geschäftsjahre 2011/2012 und 2012/2013 in Deutschland rund 12 % weniger. Trotzdem sind die Gaspreise im internationalen Vergleich wegen der unbefriedigenden Wettbewerbssituation weiterhin zu hoch; industriellen Großverbrauchern wie ThyssenKrupp fehlen immer noch Anbieter für kostengünstige Bezugsalternativen. Hinzu kommen Belastungen durch die drastisch gestiegenen Regelergiekosten. Regelergie stellt eine notwendige Systemdienstleistung der Netzbetreiber zum kontinuierlichen Ausgleich von Gaseinsparungen und -verbrauch dar. Die Preise dafür haben sich 2009/2010 in Deutschland mehr als verdoppelt.

Im Ausland konnten wir ebenfalls von teilweise günstigen Preisen auf den Energiemärkten profitieren und uns attraktive Konditionen für die kommenden Jahre sichern. So hat ThyssenKrupp Acciai Speciali Terni um ca. ein Drittel günstigere Erdgaspreise vereinbart, als sie noch 2009/2010 zu zahlen waren. Das Gas wird 2011/2012 und 2012/2013 geliefert. In Frankreich erzielte ThyssenKrupp Sofedit einen Preiserückgang von 26 % für Lieferungen 2010/2011. Auch ThyssenKrupp Steel USA konnte schon für die Hälfte des künftigen Erdgasbedarfs einen Bezugspreis von rund 25 % unter den ursprünglichen Planungen vertraglich absichern.

### Trotz gesunkener Preise: Deutsche Stromkosten im europäischen Vergleich weit oben

Die Strompreise in Deutschland lagen 2009/2010 sowohl im aktuellen Spot- als auch im längerfristigen Terminmarkt auf einem niedrigen Niveau. Im europäischen Vergleich aber rangieren die inländischen Stromkosten trotz des Preiseinbruchs weiter am oberen Ende, weil politisch bedingte Lasten wie die Stromsteuer und die Förderung der Kraft-Wärme-Kopplung den Strom verteuern. Hinzu kommen die Aufschläge für die Förderung der erneuerbaren Energien, die im Berichtsjahr massiv stiegen und hohe zusätzliche Kosten verursachten.

Wegen des Produktionsrückgangs durch die weltweite Rezession wurden im 1. Quartal 2009/2010 geringe Mengen Strom verkauft, die schon vorab auf dem Terminmarkt erworben worden waren und dann nicht mehr benötigt wurden. Teilweise musste dieser Strom unterhalb der Einstandskosten abgegeben werden. Für das restliche Geschäftsjahr lag der tatsächliche Bedarf über den bereits beschafften Mengen; die Lücke deckten wir durch günstige Zukäufe im kurzfristigen Terminmarkt.

Auf Basis eines voraussichtlich geringeren Strombedarfs führen die bereits beschafften Strommengen zu einem relativ hohen Absicherungsgrad für den erwarteten zukünftigen Strombedarf im neuen Geschäftsjahr. Auch für 2011/2012 und 2012/2013 wurden schon Teilstrommengen zu günstigen Preisen beschafft.

Mit der Inbetriebnahme des Werkes von ThyssenKrupp Steel USA in Alabama ist auch der dortige Langfristvertrag für Strombezüge in Kraft getreten. Schon bei den noch geringen Abnahmen in der Hochlaufphase liegen die sehr günstigen Konditionen beachtlich unter dem europäischen Preisniveau. In Frankreich profitierten wir noch von dem bis 2010 verlängerten staatlich regulierten Stromtarif.

### Erlöse aus Emissionshandel

ThyssenKrupp hat im Kalenderjahr 2009 auf Grund von gesetzlichen Vorschriften Emissionsberechtigungen über 21.263.403 t CO<sub>2</sub> erhalten. Angesichts der damals niedrigen Produktion im Stahlbereich lagen die tatsächlichen Emissionen jedoch nur bei 15.280.906 t CO<sub>2</sub>. Dadurch werden die zugeteilten CO<sub>2</sub>-Emissionsrechte für die zweite Handelsperiode des EU-Emissionshandels (2008 – 2012) ausreichen. Wir konnten sogar im Berichtsjahr einzelne Emissionsrechte veräußern und tragen andere vor, um sie später für die dritte Handelsperiode (2013 – 2020) zu verwenden, in der wir eine deutliche Unterdeckung erwarten.

[1]

Der für 2010/2011 erwartete Strombedarf ist zum hohen Teil abgesichert.



Alle Erlöse aus dem Emissionshandel werden durch die höheren Kosten aufgezehrt, die aus der vollständigen Überwälzung von CO<sub>2</sub>-Kosten in den Strompreis entstehen. Die Kosten für CO<sub>2</sub>-Emissionsrechte werden nämlich von den Stromerzeugern vollständig in den Strompreis eingerechnet. Deshalb liegen die Stromkosten in Deutschland und Europa – selbst bei konjunkturbedingt fallenden Strompreisen – wesentlich höher als beispielsweise in Ländern ohne Emissionshandel.

## Zusammenfassende Bewertung des Vorstands zur wirtschaftlichen Entwicklung und Zielerfüllung

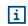

Interne Maßnahmen und konjunkturelle Erholung haben ThyssenKrupp 2009/2010 gestärkt.

ThyssenKrupp ist gestärkt aus der Wirtschafts- und Finanzkrise hervorgegangen. Auftragseingang, Umsatz und EBT zeigen, dass unser Konzern die Trendwende vollzogen hat. Dies lag zum einen an der konjunkturellen Erholung, von der wir weltweit profitierten; zum anderen haben zahlreiche interne Maßnahmen das Unternehmen effizienter und schlagkräftiger gemacht. Wir haben unsere Strukturen verbessert, die Effizienz gesteigert und unser Portfolio optimiert. All dies stärkt jetzt unsere Position auf den Märkten und bildet eine gute Ausgangsbasis für weiteres Wachstum.

Die Neuorganisation des Konzerns hat sich bewährt. Kurze Entscheidungswege und bessere Kommunikation erlauben uns, schneller auf Marktänderungen und Kundenwünsche zu reagieren. Alle acht Business Areas haben im letzten Jahr gut gearbeitet und ihre Wettbewerbsposition und Geschäftslage verbessert – selbst wenn sich das nicht überall schon in entsprechenden Ergebniszahlen niederschlägt.

Mit den neuen Werken in Brasilien und den USA haben wir in die Zukunft des Unternehmens investiert. Dank der attraktiven Absatzchancen auf dem nordamerikanischen Markt werden sie künftig nachhaltig zur Steigerung des Unternehmenswertes beitragen.



# Geschäftsverlauf in den Business Areas

Die Aktivitäten und das Know-how des Konzerns in den strategischen Kompetenzfeldern Materials und Technologies sind in unseren acht Business Areas gebündelt: Steel Europe, Steel Americas, Stainless Global, Materials Services, Elevator Technology, Plant Technology, Components Technology sowie Marine Systems. Mehr über die einzelnen Bereiche und deren Entwicklung im Berichtsjahr erfahren Sie im nachfolgenden Kapitel.

## Steel Europe

### STEEL EUROPE IN ZAHLEN

|                           |       | 2008/2009 | 2009/2010 |
|---------------------------|-------|-----------|-----------|
| Auftragseingang           | Mio € | 7.892     | 10.986    |
| Umsatz                    | Mio € | 9.570     | 10.770    |
| ThyssenKrupp Steel Europe | Mio € | 6.103     | 6.983     |
| Processing                | Mio € | 5.097     | 5.611     |
| Other Companies           | Mio € | 1.449     | 490       |
| Konsolidierung            | Mio € | – 3.079   | – 2.314   |
| EBT                       | Mio € | – 197     | 639       |
| Bereinigtes EBT           | Mio € | 21        | 639       |
| Investitionen             | Mio € | 436       | 286       |
| Mitarbeiter (30.09.)      |       | 36.416    | 34.711    |

Die Business Area Steel Europe bündelt die Qualitätsflachstahlaktivitäten des Konzerns vor allem im europäischen Markt. Die Operating Unit ThyssenKrupp Steel Europe als größter Umsatzträger beliefert den Markt direkt mit hochwertigen Qualitätsflachstahlerzeugnissen und versorgt darüber hinaus die überwiegend in nachgeschalteten Produktionsbereichen tätige Operating Unit Processing mit Vormaterial beispielsweise für Weißblech, Elektrobund und Tailored Blanks.

### Höhere Bestell- und Versandmengen

Mit der wieder festeren Stahlkonjunktur und einer über weite Strecken des Berichtsjahres hohen Stahlnachfrage hat sich die Auftrags- und Beschäftigungslage der Business Area Steel Europe positiv entwickelt. Die guten Geschäftszahlen aus den Jahren vor der Wirtschafts- und Finanzkrise wurden indes noch nicht ganz erreicht. Der wertmäßige Auftragseingang belief sich 2009/2010 auf 11,0 Mrd €, das waren 39 % mehr als im Vorjahr. Maßgeblich hierfür waren in erster Linie die um 62 % gestiegenen Auftragsmengen. In den Sommermonaten hat sich die Nachfrage lagerzyklisch und saisonal bedingt wieder etwas abgeschwächt; unsere Buchungsmöglichkeiten waren streckenweise jedoch auch eingeschränkt, da wir insbesondere auf der Rohstahlstufe an der Kapazitätsgrenze produzierten.

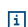

Steel Europe steigerte den Auftragseingang 2009/2010 um 39 %.



Der Umsatz der Business Area nahm um 13 % auf 10,8 Mrd € zu. Dies war auf den höheren Versand zurückzuführen, der um 29 % gestiegen ist. Die Stahlerlöse lagen im Durchschnitt des Geschäftsjahres noch deutlich unter dem Vorjahresniveau. Ab dem 3. und verstärkt im 4. Geschäftsjahresquartal konnten jedoch Preisvereinbarungen mit Kunden an die höheren Rohstoffkosten angepasst werden.

Im Zuge der Nachfragebelebung hat sich die Beschäftigungslage zunehmend verbessert. Bereits im November 2009 war der Hochofen 9 wieder angeblasen worden. Der Hochofen A bei der Beteiligungsgesellschaft Hüttenwerke Krupp Mannesmann folgte im Januar 2010. Dadurch war die Metallurgiestufe ab Geschäftsjahresmitte wieder voll ausgelastet. Bei knapper Rohstahlkapazität mussten insbesondere im letzten Geschäftsjahresquartal Brammen am Markt zugekauft werden. In den nachgeschalteten Verarbeitungslinien erholte sich die Kapazitätsauslastung ebenfalls deutlich.

Die Rohstahlerzeugung von Steel Europe einschließlich des Anteils der Beteiligungsgesellschaft Hüttenwerke Krupp Mannesmann lag im Berichtsjahr mit 13,3 Mio t um 44 % über dem niedrigen Vorjahresvolumen. Die Walzstahlproduktion für Kunden, einschließlich Lohnwalzungen, erhöhte sich um 35 % auf 13,6 Mio t.

Steel Europe erzielte 2009/2010 einen Gewinn vor Steuern von 639 Mio € nach einem Verlust im Vorjahr in Höhe von 197 Mio €. Ursächlich dafür waren die wieder höhere Nachfrage unserer Kunden, die eine bessere Auslastung der Produktionskapazitäten ermöglichte, sowie eine im Durchschnitt des Berichtsjahres verbesserte Kostensituation. Günstig hat sich die konsequente Umsetzung von Restrukturierungs- und Kostensenkungsprogrammen ausgewirkt. Die Stahlerlöse waren hingegen durchschnittlich niedriger als im vorangegangenen Geschäftsjahr, wiesen aber im Jahresverlauf eine positive Entwicklung auf.

Die Unternehmen der Business Area beschäftigten am 30. September 2010 insgesamt 34.711 Mitarbeiter, knapp 5 % weniger als zum Ende des Vorjahres. Der Belegschaftsabbau erfolgte hauptsächlich im Inland; wesentliche Ursachen waren Austritte im Rahmen des Kostensenkungsprogramms 20/10 und Verlagerung von Arbeitsplätzen auf andere Konzernteile im Zusammenhang mit der Neuorganisation des Konzerns. Die durch den dramatischen Auftragseinbruch 2008/2009 bedingte Kurzarbeit konnte nach der im Spätsommer 2009 einsetzenden Belebung der Nachfrage im abgeschlossenen Geschäftsjahr sukzessive auf Null zurückgenommen werden.

### Entwicklung der Operating Units

Die Operating Unit ThyssenKrupp Steel Europe erzielte in der Berichtsperiode einen deutlich höheren Umsatz. Erheblich gestiegene Versandmengen konnten den Rückgang der Stahlerlöse mehr als ausgleichen. Die Mengenausweitung im Vertriebsbereich Industrie betraf insbesondere das Fremdkundengeschäft, das im Vorjahr starke Einbußen verzeichnet hatte und nun vor allem von Lagerergänzungen, aber auch dem wieder gestiegenen realen Bedarf vieler Endkunden profitierte. Die stärksten Impulse gingen zunächst von Abnehmern aus dem Handel und den Stahl-Service-Centern aus. Kaltwalzer, Profilhersteller und andere Bereiche der Metallverarbeitung zogen rasch nach, wenn auch von einem sehr niedrigen Niveau kommend. Dagegen blieb die Nachfrage aus der Rohrindustrie gedämpft.

Der Versand an Kunden aus der Automobilindustrie und der Zulieferbranche hat sich ebenfalls spürbar erholt, konnte jedoch noch nicht ganz an das hohe Niveau der Jahre 2007 und 2008 anknüpfen. Mit Automobilkunden wurden die zum 01. Juli 2010 fälligen Vertragsverhandlungen abgeschlossen und Erlösverbesserungen erzielt; die Anpassung der Preise orientierte sich an der vorangegangenen und erwarteten Entwicklung der Rohstoffkosten.

Der Gewinn vor Steuern von ThyssenKrupp Steel Europe lag beträchtlich über dem Vorjahreswert. Ursächlich waren vor allem die verbesserte Mengenkonjunktur und der Entfall der im Vorjahr zu verkraftenden Restrukturierungsaufwendungen. Positiv wirkten sich auch die laufenden ThyssenKrupp best-Projekte und neu initiierte Kostensenkungsmaßnahmen aus.

Die Weiterverarbeitungsaktivitäten der Operating Unit Processing entwickelten sich unterschiedlich. Insgesamt konnte der Umsatz ausgeweitet und der Gewinn vor Steuern verbessert werden.

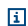

Die Kurzarbeit bei Steel Europe konnte zum Ende des Berichtsjahres ganz abgebaut werden.



Das Geschäft mit Weißblech profitierte von einer unverändert sehr lebhaften Nachfrage, insbesondere im Marktsegment Getränke- und Lebensmitteldosen. Der Umsatz nahm leicht zu. Die erheblichen Kostenerhöhungen beim Vormaterial konnten wegen der üblichen Kalenderjahresverträge noch nicht voll an die Endverbraucher weitergegeben werden. Die kräftige mengenbedingte Umsatzerhöhung bei Mittelband war auf die deutlich verbesserte Beschäftigung in der Automobilzuliefer- und Kaltwalzindustrie zurückzuführen; letztere erlebte nach dem tiefen Einbruch eine außergewöhnlich hohe Nachfrage.

Der Umsatz mit Elektroband lag konsolidierungsbedingt über dem Vorjahr. Dem Bereich Electrical Steel wurde mit Wirkung vom 01. Oktober 2009 die bisher bei ThyssenKrupp Steel Europe angesiedelte Fertigung von nicht kornorientiertem Elektroband zugeordnet. Die Nachfrage nach kornorientiertem Elektroband erholte sich nach der Krise zögerlich. Die in den letzten Jahren massiv hochgefahrenen neuen Produktionskapazitäten der Wettbewerber führten jedoch zu einem Angebotsüberhang, und die Erlöse gerieten erheblich unter Druck. Diese negativen Effekte wurden durch die Konzentration auf anspruchsvolle Qualitäten abgemildert. Positiver entwickelte sich der Bereich nicht kornorientiertes Elektroband; der Umsatz nahm bei spürbar höherem Versand zu.

Grobblech verzeichnete einen Umsatzrückgang. Der Absatz konnte vor dem Hintergrund einer verbesserten Nachfrage gesteigert werden; die Erlöse, die sich innerjährlich erholten, lagen im Durchschnitt aber unter dem Vorjahreswert. Tailored Blanks weitete das Geschäft signifikant aus. Dabei konnte ein stagnierender Versand in Europa durch kräftige Zunahmen in China und im Nafta-Raum überkompensiert werden.

Metal Forming profitierte in besonderem Maße von der sich erholenden europäischen Automobilindustrie und dem kräftigen Wachstum im chinesischen Markt, aber auch in der Nafta-Region. Nach erfolgreicher Restrukturierung wird nun eine Best-Owner-Lösung für den Bereich gesucht. Color/Construction verzeichnete ein niedrigeres Geschäftsvolumen als im Vorjahr. Eine positive Absatzentwicklung bei den Flachprodukten beispielsweise für den Fahrzeugbau und die Garagentorindustrie stand einem rückläufigen Trend im Bauelementebereich gegenüber. Es konnten einige prestigeträchtige Projekte abgewickelt werden – dazu gehörten die anspruchsvollen Wandverkleidungen im neuen ThyssenKrupp Quartier in Essen sowie Sandwich- und Trapezprofile für das neue Werk in Alabama.

#### 1

Das Elektrobandgeschäft wurde zum 01. Oktober 2009 neu geordnet.

### Wesentliche Ereignisse

Im Berichtsjahr wurde das Elektrobandgeschäft neu geordnet. Seit 01. Oktober 2009 sind die Geschäftsbereiche kornorientiertes und nicht kornorientiertes Elektroband unter operativer Führung der ThyssenKrupp Electrical Steel GmbH. Damit entstand ein Komplettanbieter, der seine Marktposition durch die zunehmende Bedeutung von Energieeffizienz weiter ausbauen wird.

Bei Tailored Blanks wurde auf Grund des verschärften Wettbewerbs im deutschen Markt die Produktion in Wolfsburg zum 30. April 2010 eingestellt und in das Hauptwerk in Duisburg-Hüttenheim integriert. Im Zuge der Werksschließung wurden auch Schweißanlagen nach China verlagert, um dem dortigen Marktwachstum besser gerecht zu werden.

Unsere Marktposition in Italien konnten wir durch die Übernahme des Geschäfts der Euroweld S.r.l. beachtlich stärken.

### Investitionen

Die Investitionen der Business Area Steel Europe in Sachanlagen und immaterielle Vermögenswerte erreichten im Berichtsjahr 286 Mio € bei Abschreibungen von 579 Mio €. Die im Vergleich zu den Abschreibungen niedrigen Investitionsausgaben resultierten aus der angesichts der Wirtschaftskrise getroffenen Entscheidung, die Investitionen deutlich zu reduzieren und sich auf Erhaltungs- und Umweltschutzmaßnahmen zu konzentrieren. Ab dem 3. Quartal des Berichtsjahres konnten im Zuge der wirtschaftlichen Erholung und der verbesserten Ertragslage wieder vermehrt Investitionsprojekte freigegeben werden. Ein Schwerpunkt lag auf der technologischen Weiterentwicklung der Fertigungsstraße des Warmbandwerks 3 in Bochum.



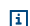

Steel Europe investierte 2009/2010 in bedeutende Umweltschutz- und Modernisierungsmaßnahmen.

Im Fokus der Investitionsausgaben standen bedeutende Umweltschutzmaßnahmen wie der Neubau einer stromerzeugenden Gichtgasentspannungsturbine im Hochofenwerk Duisburg-Hamborn, die Modernisierung der Ofenanlage zur Verringerung von Emissionen an der Contigluhe Dortmund und der Einbau von Entstaubungsanlagen in die Sinteranlage Duisburg-Schweglern zur Reduzierung der Feinstaubbelastung. Daneben flossen wesentliche Investitionsmittel in die Modernisierung der veralteten Automatisierungstechnik an der Fertigungsstraße im Warmbandwerk 2 in Duisburg-Beeckerwerth. Mit dieser Maßnahme wird das Produkt- und Abmessungsspektrum bei Rohrbandgütern und hochlegierten Stählen profitabel erweitert.

An den Elektroband-Standorten Gelsenkirchen und Isbergues, Frankreich, wurde der Kapazitätsausbau für höherwertige und zukunftssträchtige Güten weiter vorangetrieben und teilweise abgeschlossen. Das Projekt zur Kapazitätsausweitung bei Mittelband am Standort Hagen befindet sich weiterhin in Umsetzung. Darüber hinaus hat die Binnenreederei Veerhaven einen neuen Schubverband zur Sicherstellung der Rohstoffversorgung über den Rhein in Betrieb genommen.

## Steel Americas

### STEEL AMERICAS IN ZAHLEN

|                                           |       | 2008/2009 | 2009/2010 |
|-------------------------------------------|-------|-----------|-----------|
| Auftragseingang                           | Mio € | 0         | 69        |
| Umsatz                                    | Mio € | 0         | 68        |
| ThyssenKrupp CSA Siderúrgica do Atlântico | Mio € | 0         | 67        |
| ThyssenKrupp Steel USA                    | Mio € | 0         | 1         |
| Other Companies/Konsolidierung            | Mio € | 0         | 0         |
| EBT                                       | Mio € | - 216     | - 320     |
| Bereinigtes EBT                           | Mio € | - 216     | - 320     |
| Investitionen                             | Mio € | 2.135     | 2.054     |
| Mitarbeiter (30.09.)                      |       | 1.659     | 3.319     |

Mit der Business Area Steel Americas erschließen wir den nordamerikanischen Markt für hochwertige Flachstahlprodukte. Sie umfasst die Stahl- und Weiterverarbeitungswerke in Brasilien sowie den USA und organisiert die Brammenlogistik zwischen Brasilien, Deutschland und den USA.

### Stahlwerk in Brasilien hat die Produktion aufgenommen

Am 18. Juni 2010 ist das neue integrierte Hüttenwerk von ThyssenKrupp CSA Siderúrgica do Atlântico bei Santa Cruz im Westen von Rio de Janeiro in Anwesenheit von Brasiliens Staatschef Luiz Inácio Lula da Silva feierlich eröffnet worden. Mit einem Investitionsbudget von 5,2 Mrd € ist es für ThyssenKrupp das größte Auslandsengagement der Konzerngeschichte. Es ist ebenfalls die größte industrielle Investition der letzten zehn Jahre in Brasilien und zugleich das erste große Stahlwerk, das in diesem Land seit Mitte der 1980er Jahre gebaut wurde.

Die Produktionskapazität des Werkes wird am Ende der Hochlaufphase rund 5 Mio t Rohstahl jährlich betragen. Die Bauarbeiten an den wesentlichen Aggregaten sind abgeschlossen bzw. befinden sich auf der Zielgeraden. Hafenanlage und Rohstofflager sind errichtet. Die Batterie A der Kokerei und die Sinteranlage sind im abgelaufenen Geschäftsjahr fertiggestellt worden. Der erste Hochofen, das Stahlwerk und das Kraftwerk sind ebenfalls in Betrieb. Der zweite Hochofen wird Ende 2010 angefahren. Auch die Arbeiten für die Nebenanlagen, die beispielsweise Strom verteilen oder Wasser aufbereiten, sowie für die sonstigen Infrastruktureinrichtungen sind nahezu beendet. Lediglich die Arbeiten an der Kokerei werden noch einige Zeit in Anspruch nehmen. Aus heutiger Sicht erfolgt die Inbetriebnahme der Batterie B im Frühjahr 2011 und die der Batterie C im Geschäftsjahr 2011/2012.

Die ersten Brammen aus der Produktion von ThyssenKrupp CSA erreichten Steel Europe im Oktober 2010. Insgesamt wurden in Brasilien bis Ende des Berichtsjahres 36.170 t Brammen produziert.



Der brasilianische Eisenerzproduzent Vale hat im 1. Quartal 2009/2010 seinen Anteil an ThyssenKrupp CSA von rund 10 % auf knapp 27 % erhöht; der Kaufpreis betrug 965 Mio €. Dieser Schritt bestätigt den Wert unserer Investition und unseres industriellen Konzeptes. Zugleich wurde die Basis für eine langfristige Partnerschaft zwischen ThyssenKrupp und dem strategisch wichtigen Rohstofflieferanten Vale weiter gestärkt.

#### Weiterverarbeitungswerk in den USA in Betrieb gegangen

Die Bauarbeiten für unser Weiterverarbeitungswerk in Calvert im US-Bundesstaat Alabama sind in wesentlichen Teilen abgeschlossen. Das Investitionsbudget beträgt 3,6 Mrd US-Dollar. Ende Juli 2010 erfolgte die Inbetriebnahme der Warmbreitbandstraße. Das Kaltwalzwerk und die Adjustagen haben im September 2010 den Betrieb aufgenommen. Die Beize wird zu Beginn des Geschäftsjahres 2010/2011 in Betrieb gehen. Auf Grund der konjunkturellen Situation verlagert sich die Fertigstellung der Veredelungsanlagen in das Geschäftsjahr 2010/2011. Die Arbeiten für die Nebenanlagen sowie für die sonstigen Infrastruktureinrichtungen werden voraussichtlich bis Ende 2010 abgeschlossen sein.

Das Weiterverarbeitungswerk in den USA wird Brammen aus der brasilianischen Produktion zu hochqualitativen Flachprodukten weiterverarbeiten. Brammengüten, die in der Hochlaufphase zunächst nicht im brasilianischen Werk produziert werden können, werden aus Deutschland bezogen. In der Warmwalzkapazität von insgesamt etwa 5 Mio t jährlich ist auch die erforderliche Walzkapazität für das Rostfrei-Werk von Stainless Global in Alabama enthalten.

#### Ergebnissituation und Belegschaft

Die Ergebnissituation war hauptsächlich durch die mit der Fertigstellung der Projekte verbundenen Anlaufkosten sowie den Hochlauf der Produktion geprägt. Im Geschäftsjahr 2009/2010 verzeichnete die Business Area ein negatives Ergebnis vor Steuern von 320 Mio € und hat damit einen geringeren Verlust ausgewiesen als ursprünglich geplant. Wesentliche Einflussfaktoren waren neben den mit dem Projekt verbundenen Anlaufkosten positive Währungseffekte, die sich aus der Entwicklung des brasilianischen Real gegenüber dem Euro ergaben, und die Aktivierung von Bauzeitinsen.

Am 30. September 2010 waren in Brasilien 18.500 Personen und in den USA 1.500 Personen auf den Baustellen tätig. Mit zunehmendem Baufortschritt wurden immer weniger Fremdfirmen beschäftigt. Steel Americas zählte zum gleichen Zeitpunkt 3.319 eigene Mitarbeiter, davon etwa zwei Drittel bei ThyssenKrupp CSA und ein Drittel bei ThyssenKrupp Steel USA. Gegenüber dem Vorjahr hat sich damit die Mitarbeiterzahl der Business Area verdoppelt.

#### Eintritt in den Nafta-Markt

Parallel zu den Bauarbeiten an den beiden Großprojekten wurden die Marktanalysen über die Preis- und Mengenentwicklung sowie Kundenanforderungen im Nafta-Raum systematisch weitergeführt. Die Vertriebsplanung für die Hochlaufphase wurde entsprechend den Kundenwünschen und den verfügbaren Produktspezifikationen ausgearbeitet. Dazu setzten unsere Vertriebsfachleute ihre Besuche bei Schlüsselkunden in den Zielgruppen Automobil- und Elektroindustrie sowie Stahl-Service-Center und Rohrindustrie intensiv fort. Insgesamt wurden bisher über 1.300 Besuche bei Kunden, hauptsächlich in den USA, aber auch in den für unser Werk relevanten Exportmärkten, durchgeführt.

Im September 2010 konnte das erste Coil an einen Kunden ausgeliefert werden. Bis Ende des Geschäftsjahres 2009/2010 wurden rund 2.000 t an Fertigmaterial im nordamerikanischen Markt abgesetzt. Das verkaufte Material war mehrheitlich Warmbreitband und ging hauptsächlich an Stahlhändler und Stahl-Service-Center. Mit zunehmendem Hochlauf und der schrittweisen Inbetriebnahme der weiteren Produktionsanlagen werden sich das Produktportfolio und der Kundenkreis kontinuierlich erweitern.

Dem weiteren Markteintritt sehen wir zuversichtlich entgegen. Sowohl der Produktionsbeginn als auch unsere Produkte stoßen auf eine starke Resonanz bei den nordamerikanischen Kunden für Flachstahl. Die Abnehmer sind einerseits an einer Diversifikation auf der Angebotsseite durch einen neuen Anbieter interessiert, andererseits an den qualitativ höherwertigen Stahlgütern und Abmessungen, die ThyssenKrupp Steel USA anbieten wird.

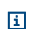

ThyssenKrupp Steel USA lieferte im September 2010 das erste Coil an Kunden aus.



## Stainless Global

### STAINLESS GLOBAL IN ZAHLEN

|                                       |       | 2008/2009 | 2009/2010 |
|---------------------------------------|-------|-----------|-----------|
| Auftragseingang                       | Mio € | 4.147     | 5.121     |
| Umsatz                                | Mio € | 4.486     | 5.901     |
| ThyssenKrupp Nirosta                  | Mio € | 1.807     | 2.454     |
| ThyssenKrupp Acciai Speciali Terni    | Mio € | 1.679     | 2.408     |
| ThyssenKrupp Mexinox                  | Mio € | 322       | 450       |
| ThyssenKrupp Stainless USA            | Mio € | 0         | 0         |
| Shanghai Krupp Stainless              | Mio € | 122       | 220       |
| ThyssenKrupp Stainless International  | Mio € | 649       | 985       |
| ThyssenKrupp VDM                      | Mio € | 743       | 796       |
| Sonstige Beteiligungen/Konsolidierung | Mio € | - 836     | - 1.412   |
| EBT                                   | Mio € | - 926     | - 121     |
| Bereinigtes EBT                       | Mio € | - 775     | - 121     |
| Investitionen                         | Mio € | 343       | 344       |
| Mitarbeiter (30.09.)                  |       | 11.755    | 11.235    |

Als einer der weltweit führenden Edelstahlproduzenten steht die Business Area Stainless Global für höchste Ansprüche bei Edelstahl-Rostfrei-Flachprodukten sowie Hochleistungswerkstoffen wie Nickellegierungen und Titan. Teil der Business Area ist auch das Edelstahlwerk in Alabama, das in Kooperation mit Steel Americas errichtet wird.

#### Auftragslage und Umsatz verbessert, Verlust erheblich reduziert

Die Auftragslage der Business Area hat sich 2009/2010 spürbar verbessert. Der mengenmäßige Auftragseingang erhöhte sich um 7 %; im Bereich Edelstahl Rostfrei stieg die Nachfrage nach Kaltband um 11 %. Auch bei den Nickellegierungen und Titan erhöhten sich die Auftragsmengen. Der wertmäßige Auftragseingang der Business Area nahm vor allem wegen der im Vergleich zum Vorjahr höheren Legierungszuschläge um 23 % auf 5,1 Mrd € zu.

Die Gesamtlieferungen stiegen im Vergleich zum Vorjahr um 18 % auf 2,2 Mio t. Während der Versand von Kalt- und Warmband im Bereich Edelstahl Rostfrei zulegte, war er in den Bereichen Titan und Nickellegierungen rückläufig. Insgesamt erhöhte sich der Umsatz um 32 % auf 5,9 Mrd €.

Stainless Global hat 2009/2010 das Ergebnis vor Steuern im Vergleich zum Vorjahr um 805 Mio € verbessert, blieb allerdings mit -121 Mio € in der Verlustzone. Mit Ausnahme des neuen Werkes ThyssenKrupp Stainless USA, das sich noch im Hochlauf befindet, konnten alle Operating Units des Edelstahl Rostfrei-Bereichs ihre Verluste beträchtlich verringern bzw. eine Rückkehr in die Gewinnzone erreichen. Ausschlaggebend dafür waren die im Vorjahresvergleich signifikant geringeren Bestandsabwertungen und Wertminderungsaufwendungen, gezielte Kostensenkungen sowie eine konjunkturell insgesamt verbesserte Marktlage, die entsprechend höhere Basispreise sowie eine bessere Auslastung der Produktionskapazitäten ermöglichte. Die Ende 2008/2009 beschlossenen Restrukturierungsmaßnahmen wurden an allen Standorten weiter umgesetzt. Mit dem Performance-Steigerungsprogramm SPRINT konnten wir die Ertragslage und die Wettbewerbsposition nachhaltig verbessern und die Kostenbasis weiter flexibilisieren.

Die Gesellschaften der Business Area Stainless Global beschäftigten am 30. September 2010 weltweit insgesamt 11.235 Mitarbeiter und damit über 4 % weniger als ein Jahr zuvor.

#### Entwicklung der Operating Units

Für die Operating Units ThyssenKrupp Nirosta sowie ThyssenKrupp Acciai Speciali Terni hat sich die Lage auf dem deutschen und europäischen Edelstahlmarkt sowohl preis- als auch mengenmäßig verbessert. Auftragseingang und Umsatz legten kräftig zu. Entsprechend hat sich das Nirosta-Ergebnis nach dem hohen Verlust im letzten Geschäftsjahr stark verbessert. Auch für ThyssenKrupp Acciai

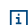

Stainless Global verzeichnete 2009/2010 ein Umsatzplus von 32 %.



Speciali Terni hat sich die Ergebnissituation positiv entwickelt. In beiden Operating Units trugen höhere Basispreise, gestiegene Kaltbandmengen sowie eine Realisierung der Restrukturierungsmaßnahmen zur Ergebnisverbesserung bei. Die unverändert stabile Entwicklung im Schmiedebereich stützte die Entwicklung von ThyssenKrupp Acciai Speciali Terni zusätzlich.

ThyssenKrupp Mexinox und Shanghai Krupp Stainless verzeichneten ebenfalls einen höheren mengen- und wertmäßigen Auftragseingang sowie gestiegene Versandmengen und Umsätze. In Mexiko nahm neben der einsetzenden Wiederbeschaffung auf der Handelsseite auch die Nachfrage der Automobil- und Hausgeräteindustrie deutlich zu. Zudem stabilisierte sich der US-Markt. Bei Shanghai Krupp Stainless sorgten vor allem Lohnwalzaufträge chinesischer Edelstahlproduzenten für eine verbesserte Auslastung. Die Ergebnisse vor Steuern der Operating Units waren bei ThyssenKrupp Mexinox leicht positiv, bei Shanghai Krupp Stainless leicht negativ.

Die global anziehende Nachfrage hat sich in der Operating Unit ThyssenKrupp Stainless International sowohl beim Auftragseingang als auch beim Umsatz positiv ausgewirkt. Zusammen mit den realisierten Kosteneinsparungsmaßnahmen führte die weltweit einsetzende Stabilisierung der Edelstahlmärkte zu einem spürbar verbesserten Ergebnis.

ThyssenKrupp VDM erreichte einen höheren Auftragseingang und Umsatz, konnte allerdings an der im Vergleich zum Edelstahl spätzyklisch einsetzenden Markterholung nicht in vollem Umfang teilhaben. Das Geschäftsfeld Nickellegierungen hat sich seit Jahresbeginn belebt, das Erlösniveau blieb weitestgehend stabil. Auch der Markt für Titanlegierungen hat sich wieder leicht erholt; vor allem Kunden aus dem Bereich Aerospace zeigten eine höhere Nachfrage. Auf Grund eingeleiteter Restrukturierungsmaßnahmen und größtenteils entfallener Bestandsabwertungen konnte ein leicht positives Ergebnis erzielt werden.

### Edelstahlwerk in den USA

In Zusammenarbeit mit Steel Americas entsteht im US-Bundesstaat Alabama ein modernes integriertes Rostfrei-Werk; das Investitionsvolumen beträgt rund 1,4 Mrd US-Dollar. Der Baufortschritt verläuft im Rahmen des verabschiedeten Zeitplans.

Die Inbetriebnahme des ersten Walzgerüsts startete Ende September 2010, gefolgt von der Kaltband-Glüh- und Beizlinie und dem Dressiergerüst; bereits im Juni 2010 waren in der Adjustage die Quertzerteilanlage und die Coil-Polier-Anlage in Betrieb gegangen. Im November 2010 ist die erste Spaltanlage angefahren worden.

Die Bauarbeiten an den Fundamenten der Warmband-Glüh- und -Beizlinie und des zweiten Walzgerüsts sind plangemäß im Januar 2010 gestartet worden. Im September 2010 wurde mit dem Aufbau der Anlagen begonnen, die Inbetriebnahme ist für Oktober 2011 vorgesehen.

Der Aufbau des dritten Walzgerüsts und zusätzlicher Finishing-Anlagen wird weiterhin flexibel gehandhabt und ist um bis zu weitere 24 Monate verschiebbar.

Der Umfang des Gesamtprojekts wird unverändert beibehalten, da wir nach wie vor von einem Bedarf für einen optimierten Edelstahl-Produktionsstandort auf dem nordamerikanischen Markt ausgehen. Um den Produktionsstart des Stahlwerks flexibel handhaben zu können, wird an dessen detailliertem Engineering weiterhin intensiv gearbeitet. Die Belieferung des Standorts mit Warmband wird zunächst aus den europäischen Werken sichergestellt.

### Investitionen

Stainless Global investierte im Berichtsjahr 344 Mio € in Sachanlagen und immaterielle Vermögenswerte bei Abschreibungen von 160 Mio €. Schwerpunkt der Investitionen war der Aufbau des voll integrierten Edelstahlwerks ThyssenKrupp Stainless USA in Alabama.

ThyssenKrupp Nirosta investierte größere Beträge in die Instandhaltung und Modernisierung der Produktionsanlagen. Mit einem wesentlichen Anteil der Investitionen haben wir zudem das Brandschutzkonzept ausgebaut.

ThyssenKrupp Acciai Speciali Terni investierte vor allem in den Glüh- und Beizbereich. Darunter war auch die Fertigstellung des Einbaus von Walzgerüsten im Einlaufbereich der neuen Warmbandlinie; sie

[1]

Investitionsschwerpunkt von Stainless Global war 2009/2010 das Edelstahlwerk in Alabama.



erweitert die Kaltbandkapazität. Inzwischen kann dadurch Semi-Kaltband produziert werden, das das klassische Kaltband für bestimmte Anwendungen zum Vorteil von Kunden ersetzen kann. Darüber hinaus wurde die Entstaubungsanlage im Stahlwerk Terni modernisiert und erweitert.

ThyssenKrupp Mexinox setzte verschiedene Einzelmaßnahmen zur Erhaltung und zum Ausbau der Anlagen um. Auf Grund der angespannten Sicherheitslage in Mexiko und auch am Standort San Luis Potosi investierten wir zudem in Schutzmaßnahmen für unsere Mitarbeiter und das Werk.

Im Kaltwalzwerk von Shanghai Krupp Stainless fanden 2009/2010 im Wesentlichen Ersatzinvestitionen statt; außerdem wurde die Umsetzung des Brandschutzkonzeptes vorangetrieben.

ThyssenKrupp Stainless International hat das Distributions- und Service-Center-Netzwerk weiter ausgebaut. Investitionen in das Service-Center im Großraum Istanbul tragen der wachsenden Bedeutung des türkischen Marktes Rechnung.

ThyssenKrupp VDM schloss das im Jahr 2006 begonnene Investitionsprogramm ab, mit dem das Geschäft insbesondere in den Marktsegmenten Luftfahrt sowie Öl und Gas gestärkt und ausgebaut wurde. Darüber hinaus wurden Investitionen vor allem in den Bereichen Verbesserung des Brandschutzes, Erhaltung der Betriebsbereitschaft, Erfüllung behördlicher Auflagen sowie Prozessoptimierung getätigt.

## Materials Services

### MATERIALS SERVICES IN ZAHLEN

|                      |       | 2008/2009 | 2009/2010 |
|----------------------|-------|-----------|-----------|
| Auftragseingang      | Mio € | 12.085    | 12.805    |
| Umsatz               | Mio € | 12.815    | 12.763    |
| Metals Services      | Mio € | 8.139     | 8.201     |
| Special Services     | Mio € | 3.192     | 3.748     |
| Industrial Services  | Mio € | 1.544     | 880       |
| Konsolidierung       | Mio € | - 60      | - 66      |
| EBT                  | Mio € | - 295     | 411       |
| Bereinigtes EBT      | Mio € | - 223     | 330       |
| Investitionen        | Mio € | 279       | 188       |
| Mitarbeiter (30.09.) |       | 44.316    | 33.856    |

Die Business Area Materials Services ist an 500 Standorten in über 40 Ländern auf Distribution von Roh- und Werkstoffen einschließlich technischer Dienstleistungen spezialisiert. Über die Produkte hinaus reicht der Service von Anarbeitung und Logistik über Lager- und Bestandsmanagement bis hin zu Supply-Chain- sowie Projektmanagement.

### Nachfrage und Preise moderat erholt – deutliche Ergebnisverbesserung

Im abgelaufenen Geschäftsjahr erreichte Materials Services mit 12,8 Mrd € nahezu wieder den Vorjahresumsatz, obwohl die im 1. Quartal veräußerten Bereiche ThyssenKrupp Industrieservice und ThyssenKrupp Safway nur für zwei bzw. drei Monate in den Zahlen enthalten sind. Insgesamt haben sich die Mengen und Erlöse nach einem schwachen Start im Verlauf von 2009/2010 schrittweise verbessert; dies galt jedoch nicht im gleichen Maße für alle Produktbereiche und Regionen. Zudem zeigten sich gegen Ende des Geschäftsjahres leichte Abschwächungstendenzen.

Materials Services verbesserte gegenüber dem Vorjahr das Ergebnis vor Steuern um 706 Mio € auf 411 Mio €. Darin enthalten sind auch die Erträge aus der Veräußerung der oben genannten Gesellschaften; bereinigt um diese Sondereffekte belief sich das EBT auf 330 Mio €. Neben der wirtschaftlichen Erholung war der Ergebnisanstieg vor allem auf die nachhaltig gesenkten Kosten zurückzuführen. Angesichts des stabilisierten Preisniveaus mussten zudem – anders als im Vorjahr – keine nennenswerten Bestandsabwertungen verkraftet werden.

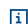

Materials Services erwirtschaftete 2009/2010 ein EBT von 411 Mio €.



Die Gesellschaften der Business Area beschäftigten am Ende des Geschäftsjahres 33.856 Mitarbeiter, 24 % weniger als ein Jahr zuvor. Auf Grund der Desinvestitionen ist die Mitarbeiterzahl um über 12.000 zurückgegangen; zusätzlich fielen auf allen Ebenen im Rahmen der Kostensenkungsprogramme annähernd 3.000 Arbeitsplätze weg. In der gleichen Zeit haben aber die Geschäftszunahme in einigen Regionen sowie ein stärkeres Dienstleistungs-Projektgeschäft zu einem Zuwachs von 4.700 Mitarbeitern geführt.

### Entwicklung der Operating Units

Die Operating Unit Metals Services fasst die weltweiten Werkstoffaktivitäten im Lager-, Service- und Streckengeschäft zusammen – insbesondere mit Walzstahl, Edelstahl, Rohren und NE-Metallen in allen Qualitäten und Ausführungen. Zwar sind die Bestellmengen aus dem verarbeitenden Gewerbe, dem Maschinen- und Anlagenbau und eingeschränkt auch aus der Bauwirtschaft spürbar gestiegen, sie lagen jedoch noch weit unter den Rekordwerten von 2007/2008. Der Umsatz der Operating Unit übertraf trotz höherer Mengen das Niveau des Vorjahres nur leicht, weil das durchschnittliche Preisniveau immer noch niedriger war. Dies galt – mit Ausnahme der Service-Center-Aktivitäten, die sich sehr gut entwickelten – für Deutschland, aber auch für einige andere westeuropäische Länder. Der osteuropäische Markt hat sich dagegen deutlich schneller erholt.

4

Metals Services lieferte den höchsten EBT-Beitrag der Business Area.

In Nordamerika entwickelte sich insbesondere der NE-Metallbereich exzellent. Das internationale Streckengeschäft mit Walzstahl und Rohren litt dagegen unter zurückhaltender Nachfrage und einem sehr harten Wettbewerb bei den wenigen ausgeschriebenen Großprojekten: Die Kunden disponierten generell vorsichtig und vergaben Aufträge stärker rein projektbezogen und sehr kurzfristig. Zusätzlich zur konjunkturellen Erholung haben erhebliche strukturelle Maßnahmen die wirtschaftliche Situation der Operating Unit verbessert; dazu gehörten Unternehmensverschmelzungen, Geschäftsbündelungen, Standortzusammenführungen sowie optimierte Prozesse in Einkauf, Logistik und Vertrieb. Nach dem deutlichen Verlust im Vorjahr konnte Metals Services 2009/2010 den Gewinn vor Steuern deutlich ausbauen und verzeichnete das beste Ergebnis in der Business Area.

In der Operating Unit Special Services haben wir die Werkstoff- und Supply-Chain-Aktivitäten für die Luft- und Raumfahrtindustrie sowie das Lager- und Servicegeschäft mit Kunststoffen gebündelt. Hinzu kommt die Distribution von Rohstoffen wie Metalle, Legierungen, Koks/Kohle und Mineralien. Beratungs- und serviceintensive Produkte für die Bau- und Gleistechnik zusammen mit Technik-, Projektmanagement- und Stahlwerksdienstleistungen runden das Portfolio ab. Special Services konnte den Umsatz gegenüber dem Vorjahr nennenswert ausweiten. Sehr erfreulich entwickelte sich dabei der weltweite Bereich Aerospace. Mit den führenden Flugzeugherstellern in Europa und Nordamerika vereinbarten wir neue Projekte und schlossen langfristige Verträge ab; in China wird das Geschäft derzeit aufgebaut. In der Kunststoffdistribution, in der wir zu den weltweit führenden Anbietern gehören, zog das Geschäft nach der langen witterungsbedingten Winterpause in der Bauindustrie spürbar an. Dennoch herrschte ein hoher Margen- und Wettbewerbsdruck. In Deutschland haben wir die Organisation erheblich gestrafft und gleichzeitig eine weitreichende Vertriebsinitiative gestartet.

Im Zuge der merklich verbesserten Beschäftigung in der Stahlindustrie wurde das Rohstoffgeschäft insbesondere mit Legierungen und Koks/Kohle beachtlich ausgeweitet. Für unsere stahlwerksnahen Dienstleistungen hat sich die Beschäftigungslage in Brasilien auf einem erfreulich hohen Niveau stabilisiert; zum Ende des Berichtsjahres wurden erste größere Projekte für das konzerneigene Stahlwerk CSA in Brasilien abgerechnet. Auch in Deutschland war die Auslastung wesentlich höher als im Vorjahr. Witterungsbedingte Verschiebungen, Verzögerungen in der Umsetzung von Konjunkturprogrammen, Finanzierungsschwierigkeiten bei Großprojekten, aber auch erhöhter Wettbewerbsdruck beeinträchtigten hingegen den Umsatz in der Bau- und Gleistechnik. Insgesamt konnte die Operating Unit Special Services aber das auch im Krisenjahr 2008/2009 gute EBT weiter verbessern. Dazu haben vor allem der Ausbau des Aerospace- und Rohstoffgeschäfts sowie die Strukturmaßnahmen im Kunststoffbereich beigetragen.



Die Operating Unit Industrial Services war im Wesentlichen durch die Verkäufe von ThyssenKrupp Industrieservice und ThyssenKrupp Safway geprägt. Umsatz und der um Sondereffekte bereinigte Gewinn vor Steuern erreichten 2009/2010 nicht ganz das Niveau des Vorjahres.

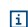

2009/2010 wurde das Kunststoffgeschäft in Deutschland neu geordnet.

### Wesentliche Ereignisse

Neben dem Verkauf der beiden Gesellschaften im Bereich Industriedienstleistungen lag 2009/2010 eine der wesentlichen Strukturaufgaben darin, das Kunststoffgeschäft in Deutschland neu zu ordnen. Als Voraussetzung dafür haben wir die Übernahme der Thyssen Röhm Kunststoffe GmbH von der Evonik Industries AG abgeschlossen.

Darüber hinaus wurden vielfach Unternehmen verschmolzen und Aktivitäten zusammengefasst. Durch den im April 2010 erfolgten Erwerb der Techno-Stahl Stahlgroßhandel und Brennschneidbetrieb GmbH in Österreich, einem Spezialisten für thermisches Trennen von Blechen und Brammen, hat Materials Services außerdem die Anarbeitungskapazitäten weiter ausgebaut und insbesondere die mittel- und südosteuropäischen Werkstoffdienstleistungen verstärkt.

### Investitionen

Bei Abschreibungen von 142 Mio € beliefen sich die Investitionen von Materials Services für Sachanlagen und immaterielle Vermögenswerte auf 125 Mio €. Den Schwerpunkt bildete der Neubau des Service-Centers der ThyssenKrupp Stahl-Service-Center GmbH in Krefeld. Diese hochmoderne und weiter erweiterungsfähige Betriebsstätte ersetzt die bisherige Hauptverwaltung in Langenfeld sowie die Niederlassungen in Bochum und Leverkusen. Die weiteren Sachinvestitionen dienten im Wesentlichen kleineren Modernisierungen und der Aufrechterhaltung der Betriebsbereitschaft.

## Elevator Technology

### ELEVATOR TECHNOLOGY IN ZAHLEN

|                                       |       | 2008/2009 | 2009/2010 |
|---------------------------------------|-------|-----------|-----------|
| Auftragseingang                       | Mio € | 5.038     | 5.099     |
| Umsatz                                | Mio € | 5.308     | 5.188     |
| Central/Eastern/Northern Europe       | Mio € | 1.521     | 1.449     |
| Southern Europe/Africa/Middle East    | Mio € | 819       | 824       |
| Americas                              | Mio € | 2.122     | 1.984     |
| Asia/Pacific                          | Mio € | 634       | 737       |
| Escalators/Passenger Boarding Bridges | Mio € | 329       | 331       |
| Accessibility                         | Mio € | 227       | 218       |
| Corporate/Konsolidierung              | Mio € | - 344     | - 355     |
| EBT                                   | Mio € | 570       | 602       |
| Bereinigtes EBT                       | Mio € | 598       | 602       |
| Investitionen                         | Mio € | 135       | 81        |
| Mitarbeiter (30.09.)                  |       | 42.698    | 44.024    |

Das Produktprogramm der Business Area Elevator Technology umfasst Personen- und Lastenaufzüge, Fahrtreppen und Fahrsteige, Fluggastbrücken, Treppen- und Plattformlifte sowie den Service für die gesamte Produktpalette. 44.024 Mitarbeiter an mehr als 900 Standorten sorgen für ein dichtes Service- und Dienstleistungsnetz und somit für eine optimale Nähe zum Kunden.

### Ergebnis weiter gesteigert

Die Business Area hat sich 2009/2010 in einem nach wie vor schwierigen Marktumfeld gut entwickelt. Der Auftragseingang blieb im Vergleich zum Vorjahr mit 5,1 Mrd € stabil. Der wachsende Servicebereich konnte einen Rückgang im Modernisierungsgeschäft ausgleichen. Wechselkurseffekte wirkten sich mit 129 Mio € insgesamt positiv auf den Auftragseingang aus. Die Operating Unit Escalators/Passenger



Boarding Bridges konnte eine leichte, die Operating Unit Asia/Pacific eine deutliche Steigerung erzielen. Während die Operating Units Central/Eastern/Northern Europe, Americas und Accessibility stabile Auftragseingänge verzeichneten, erreichte Southern Europe/Africa/Middle East das Vorjahresniveau nicht ganz.

Der Umsatz verminderte sich leicht um 2 % auf 5,2 Mrd €, was wesentlich auf einen Rückgang im Neuinstallations- und Modernisierungsgeschäft zurückzuführen war. Der Serviceumsatz sowie die Anzahl der unter Vertrag stehenden Wartungseinheiten konnten hingegen weiter gesteigert werden. Wechselkurseffekte wirkten analog zum Auftragseingang positiv mit 125 Mio €. Während die Operating Unit Asia/Pacific ein deutliches Wachstum erzielte, konnte die Operating Unit Americas den guten Vorjahreswert nicht bestätigen. Alle anderen Operating Units behaupteten entweder das Vorjahresniveau oder mussten leichte Rückgänge hinnehmen.

Elevator Technology erwirtschaftete ein Ergebnis vor Steuern von 602 Mio € und konnte damit den Rekordwert des Vorjahres nochmals um 6 % übertreffen. Wechselkurseffekte wirkten auch hier positiv. Alle Operating Units lieferten positive Ergebnisbeiträge.

Die Zahl der Mitarbeiter lag am 30. September 2010 bei 44.024 und hat sich damit gegenüber dem Vorjahr um 3 % erhöht. Größere Zuwächse gab es vor allem in China, im Mittleren Osten sowie in Brasilien.

#### Entwicklung der Operating Units

Die Operating Unit Central/Eastern/Northern Europe verzeichnete 2009/2010 einen stabilen Auftragszugang. Während das Geschäft in Großbritannien, Frankreich und Osteuropa nachgab, konnten in allen anderen Regionen die Vorjahreswerte erreicht oder übertroffen werden. Der Umsatz blieb hinter dem Vorjahreswert zurück. Ursache hierfür war die deutlich rückläufige Entwicklung in Großbritannien, Frankreich und Osteuropa. Das Geschäft auf dem deutschen Markt konnte hingegen ausgeweitet werden. Die übrigen Regionen verzeichneten stabile Umsätze. Das Ergebnis vor Steuern der Operating Unit lag unter dem Niveau des Vorjahres. Steigerungen in Osteuropa, Österreich sowie den Benelux-Ländern standen spürbare Rückgänge in Großbritannien und Frankreich gegenüber.

Der Auftragseingang der Operating Unit Southern Europe/Africa/Middle East fiel etwas niedriger aus als im Vorjahr; dies lag insbesondere am zurückgegangenen Modernisierungsgeschäft. Während die Golfstaaten und die Türkei dank des Neuinstallationsgeschäfts spürbar höhere Auftragseingänge erzielten, verlief das Geschäft in Ägypten sowie auf der iberischen Halbinsel schwächer. Auf Grund starker Umsatzzuwächse vor allem in den Golfstaaten, aber auch in Ägypten, der Türkei sowie in Italien erreichte die Operating Unit insgesamt das Vorjahresniveau. Auf der iberischen Halbinsel konnte das stabile Servicegeschäft das nachlassende Neuanlagen- und Modernisierungsgeschäft jedoch nicht kompensieren. Der Gewinn vor Steuern lag etwa auf Vorjahresniveau. Vor allem in den Golfstaaten und Spanien erhöhte sich das Ergebnis im Vergleich zum Vorjahr. Rückgänge gab es hingegen in Italien und der Türkei.

Die Operating Unit Americas beendete das Berichtsjahr mit einem Auftragseingang auf Vorjahresniveau. Positiv wirkten sich dabei Wechselkurseffekte beim kanadischen Dollar sowie beim brasilianischen Real aus. Wechselkursbereinigt musste die Operating Unit aber einen leichten Rückgang hinnehmen, vor allem wegen des nachlassenden Neuanlagengeschäfts in Nordamerika. Brasilien verzeichnete hingegen auch wechselkursbereinigt einen höheren Auftragseingang. Der Umsatz der Operating Unit nahm trotz positiver Wechselkurseinflüsse ab und konnte damit das gute Vorjahresniveau nicht erreichen: Rückgänge im Neuanlagengeschäft sowie bei Modernisierungen ließen sich nicht durch den wachsenden Servicebereich auffangen. Erfreulich entwickelte sich der Umsatz in Südamerika und insbesondere in Brasilien. Auf Grund des erheblichen Gewinnanstiegs in Brasilien und positiver Wechselkurseffekte erreichte die Operating Unit beim EBT wieder den sehr guten Vorjahreswert. Höhere Ergebnisse im Servicebereich glichen die Rückgänge des Neuinstallations- und Modernisierungsgeschäfts aus.

1

Mit einem EBT von 602 Mio € übertraf Elevator Technology den Rekordwert des Vorjahres.





Ein starkes Neuinstallations- und Servicegeschäft in Asien sorgte für einen hohen Auftragseingang.

Starke Zuwächse im Neuinstallations- und Servicegeschäft führten in der Operating Unit Asia/Pacific zu einem deutlich höheren Auftragseingang; ausschlaggebend war die anhaltend gute Entwicklung in China. Wechselkurseffekte wirkten zudem leicht positiv. Die Geschäftsaktivitäten in Südostasien erreichten hingegen nicht ganz die Auftragseingangswerte des Vorjahres. Der Umsatz konnte wegen der starken Bautätigkeit in China erheblich zulegen. Fühlbare Rückgänge gab es in Australien, während das Geschäft in Korea stabil war. Wechselkurseffekte wirkten sich insgesamt positiv auf den Umsatz aus. Die deutliche Steigerung des EBT war zum einen auf das Wachstum in China zurückzuführen, zum anderen konnte das Ergebnis in Korea im Vorjahresvergleich erheblich verbessert werden.

Während die Operating Unit Escalators/Passenger Boarding Bridges den Auftragseingang im Vergleich zum Vorjahr ausbaute, blieb der Umsatz stabil. Rückläufige Entwicklungen bei Fluggastbrücken konnten sowohl beim Auftragseingang als auch beim Umsatz durch eine erfreuliche Entwicklung im Fahrtreppenbereich überkompensiert werden. Das Ergebnis vor Steuern wurde merklich gesteigert, was aber im Vergleich zum Vorjahr zum großen Teil auf den Wegfall von Restrukturisierungskosten beim deutschen Fahrtreppenwerk zurückzuführen war.

Trotz Zuwächsen in Europa und Asien konnte die Operating Unit Accessibility den Auftragseingang und Umsatz nur auf Vorjahresniveau halten. Ursache hierfür waren die deutlichen Rückgänge bei den nordamerikanischen Geschäftsaktivitäten auf Grund der Finanz- und Immobilienkrise. Das EBT des Vorjahres konnte bestätigt werden.

### Wesentliche Ereignisse

Elevator Technology hat auch 2009/2010 ihre Service- und Vertriebsaktivitäten kontinuierlich ausgebaut. Neben dem Erwerb kleinerer Aufzugsfirmen in Deutschland stand die Akquisition des französischen Unternehmens Atena S.A., Paris, im Fokus der Expansionsstrategie. Mit der Übernahme der Restanteile an der ThyssenKrupp Asansör Sanayi ve Tic. A.S., Istanbul, verfügt die Business Area nun über 100 % der Anteile an der türkischen Gesellschaft.

### Investitionen

Die Investitionen der Business Area für Sachanlagen und immaterielle Vermögenswerte beliefen sich im Geschäftsjahr 2009/2010 auf 70 Mio € bei Abschreibungen von 72 Mio €.

Neben Ersatzinvestitionen wurden vor allem die Produktionserweiterung und -optimierung in China und Indien vorangetrieben. Zudem startete der Bau eines neuen Aufzugswerks in Spanien. In zahlreichen Ländern wurden die IT-Systeme an die veränderten Prozessabläufe angepasst.

## Plant Technology

### PLANT TECHNOLOGY IN ZAHLEN

|                                       |       | 2008/2009 | 2009/2010 |
|---------------------------------------|-------|-----------|-----------|
| Auftragseingang                       | Mio € | 3.538     | 3.859     |
| Umsatz                                | Mio € | 4.450     | 3.931     |
| Uhde                                  | Mio € | 2.025     | 1.450     |
| Polysius                              | Mio € | 1.061     | 1.077     |
| Fördertechnik                         | Mio € | 670       | 821       |
| System Engineering                    | Mio € | 701       | 561       |
| Transrapid                            | Mio € | 35        | 48        |
| Sonstige Beteiligungen/Konsolidierung | Mio € | – 42      | – 26      |
| EBT                                   | Mio € | 236       | 308       |
| Bereinigtes EBT                       | Mio € | 281       | 308       |
| Investitionen                         | Mio € | 61        | 32        |
| Mitarbeiter (30.09.)                  |       | 13.043    | 12.972    |



Die Business Area Plant Technology ist ein international führender Anbieter im Spezial- und Großanlagenbau. Das Produktportfolio reicht von Chemie-, Raffinerie- und Industrieanlagen über Anlagen für die Zementindustrie und innovative Lösungen zum Abbau und zur Gewinnung von Rohstoffen und Mineralien bis hin zu Produktionssystemen und Montageanlagen für die Automobilindustrie. Die Anlagen und Verfahren der Business Area eröffnen neue Möglichkeiten für Umweltschutz und Nachhaltigkeit.

### Stabiler Geschäftsverlauf in schwierigem Marktumfeld

Plant Technology spürte im abgelaufenen Geschäftsjahr besonders in den Bereichen Petrochemie und Zementindustrie einen signifikant verschärften Wettbewerb. In einem insgesamt schwierigen Marktumfeld war die Entwicklung dennoch stabil. Plant Technology erzielte 2009/2010 einen Auftragseingang von 3,9 Mrd € und konnte damit den Wert des Vorjahres um 9 % steigern. Zu dieser positiven Entwicklung trugen insbesondere die Operating Units Uhde, Fördertechnik und System Engineering bei. Der Großteil der Aufträge konnte von internationalen Kunden gewonnen werden. Als wichtigste Regionen erwiesen sich Asien mit 39 %, Amerika mit 21 % und Afrika mit 14 %.

Der Umsatz lag 2009/2010 abrechnungsbedingt mit 3,9 Mrd € um 12 % unter dem Vorjahresniveau. Der Auftragsbestand von rund 6,2 Mrd € zum 30. September 2010, der hauptsächlich aus dem längerfristigen Projektgeschäft stammt, sichert nach wie vor mehr als einen Jahresumsatz.

Mit 308 Mio € erzielte Plant Technology ein Ergebnis vor Steuern auf Rekordniveau. Hierzu haben im Wesentlichen Uhde, Polysius und Fördertechnik beigetragen.

Die Mitarbeiterzahl hat sich zum 30. September 2010 gegenüber dem Vorjahr mit einem Rückgang um 0,5 % auf 12.972 kaum verändert. Neben dem Verkauf des Geschäftsbereichs Sonderfahrzeugbau von System Engineering führten Restrukturierungsmaßnahmen bei System Engineering und Transrapid zu einem Arbeitsplatzrückgang. Wegen der guten Auftragslage stieg dagegen die Zahl der Mitarbeiter insbesondere bei Fördertechnik.

### Entwicklung der Operating Units

Die Operating Unit Uhde erzielte im Berichtsjahr einen deutlich höheren Auftragseingang. Verantwortlich hierfür waren verschiedene Großaufträge. So hat Uhde Aufträge zur Errichtung jeweils einer Düngemittelanlage in Abu Dhabi und Ägypten erhalten. Im indischen Bundesstaat Orissa wird eine moderne Wasserstoffanlage errichtet, und in den USA konnte der Auftrag für den Neubau einer Kokereianlage gewonnen werden. Der Umsatz von Uhde gab im Vergleich zum Vorjahr, in dem einige Großaufträge abgeschlossen wurden, spürbar nach. Der Gewinn vor Steuern lag dennoch abrechnungsbedingt deutlich über dem hohen Vorjahresniveau.

In der Operating Unit Polysius, die Anlagen für die Zement- und Minerals-Industrie errichtet, war der Auftragseingang 2009/2010 schwächer als im Vorjahr. Dies lag vor allem an mehreren Großaufträgen, die den Vorjahreswert positiv beeinflusst hatten. Im Berichtszeitraum haben sich dagegen mehrere Projekte verzögert, dennoch konnten in Mexiko und Vietnam größere Aufträge akquiriert werden. Auf Grund des hohen Auftragsbestands konnte der Umsatz erneut gegenüber dem Vorjahr gesteigert werden. Das Ergebnis vor Steuern erreichte auch dank einer stärkeren operativen Performance erneut das gute Vorjahresniveau.

Erfreulich entwickelte sich Fördertechnik. Der Auftragseingang für fördertechnische Anlagen stieg 2009/2010 auf ein Rekordniveau. Hierzu trugen insbesondere die Aufträge für Tagebauausrüstungen einschließlich zweier vollmobiler Brechanlagen in Brasilien, für eine komplette Kraftwerksbekohlungsanlage in Südafrika sowie für mehrere dezentrale Kraftwerke in Indien bei. Der größte Einzelauftrag in der Geschichte von Fördertechnik konnte von einem kanadischen Kunden gewonnen werden: eine komplette Ölsandaufbereitungsanlage, in der neue technische Entwicklungen zum Einsatz kommen werden. Der Auftragsbestand zum Geschäftsjahresende erreichte mit nahezu zwei Jahresumsätzen den bisher höchsten Wert. Auch der Umsatz und das Ergebnis vor Steuern verbesserten sich gegenüber dem hohen Vorjahresniveau weiter.

4

Der Auftragsbestand von Plant Technology von 6,2 Mrd € sichert mehr als einen Jahresumsatz.

4

ThyssenKrupp Fördertechnik steigerte 2009/2010 Auftragseingang, Umsatz wie auch das EBT.



Die Operating Unit System Engineering – Spezialist bei Produktionssystemen und Montageanlagen für die Automobilindustrie – erzielte merklich höhere Auftragseingänge. Gestiegene Bestellungen im Wesentlichen im Bereich Rohkarosserien konnten geringere Abrufe in der Teilefertigung auf Grund der geringeren Produktionsstückzahlen und temporären Werksschließungen einzelner Kunden mehr als ausgleichen. Demgegenüber lag der Umsatz abrechnungsbedingt niedriger als im Vorjahr. Niedrigere Abrufe in der Teilefertigung, die Unterauslastung im Bereich Montageanlagen, Zusatzaufwendungen bei einer Auslandsgesellschaft sowie Restrukturierungsaufwendungen führten zu einem negativen Ergebnis vor Steuern.

Transrapid erzielte im Wesentlichen dank der Abrechnungen aus dem chinesischen Lizenzvertrag einen höheren Umsatz und Gewinn vor Steuern.

### Wesentliche Ereignisse

Zur weiteren Erschließung des asiatischen Marktes hat Polysius die Fertigung in China weiter ausgebaut und eine zusätzliche Gesellschaft in Vietnam gegründet. Mit dem Erwerb der Assets einer kanadischen Gesellschaft wurde die technologische Basis für das Ölschiefergeschäft erweitert.

Mit dem südafrikanischen Engineeringunternehmen PDNA hat ThyssenKrupp Engineering Südafrika ein Gemeinschaftsunternehmen gegründet, das alle Anforderungen der Black Economic Empowerment Qualification erfüllt. So sind Uhde und Fördertechnik sowohl bei öffentlichen Auftraggebern als auch bei großen „Public Companies“ für anstehende Projektvergaben bestens positioniert.

Zur weiteren Kapazitätsoptimierung bei System Engineering wurde der polnische Standort in Gdansk geschlossen. Das Geschäftsfeld Sonderfahrzeugbau von ThyssenKrupp Drauz Nothelfer wurde verkauft.

### Investitionen

Die Investitionen der Business Area in Sachanlagen und immaterielle Vermögenswerte erreichten im Berichtsjahr 32 Mio €. Die Abschreibungen betrugen 35 Mio €. Schwerpunkte waren die Erweiterung vorhandener Fertigungskapazitäten und die Entwicklung neuer Technologien. Alle Operating Units von Plant Technology haben zudem erheblich in die Erweiterung der Technologiebasis und Stärkung des internationalen Engineering- und Produktionsnetzwerks investiert.

Uhde erweiterte sein Engineering-Büro in Mumbai, um der steigenden Nachfrage indischer Kunden nachzukommen. Im Rahmen der strategischen Biotechnologie-Entwicklung wurde eine PLA(Polylactide)-Anlage in Brandenburg errichtet, die Polyester auf Basis nachwachsender Rohstoffe herstellt.

Im Rahmen der Low-Cost-Sourcing-Strategie investierte Polysius in eine Montage- und Fertigungswerkstatt in Shanghai.

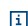

Plant Technology investierte im Berichtsjahr 32 Mio €.

## Components Technology

### COMPONENTS TECHNOLOGY IN ZAHLEN

|                                       |       | 2008/2009 | 2009/2010 |
|---------------------------------------|-------|-----------|-----------|
| Auftragseingang                       | Mio € | 4.177     | 5.653     |
| Umsatz                                | Mio € | 4.603     | 5.724     |
| Presta Camshafts                      | Mio € | 209       | 299       |
| Forging Group                         | Mio € | 587       | 788       |
| Waupaca                               | Mio € | 612       | 860       |
| Rothe Erde                            | Mio € | 1.096     | 992       |
| Berco                                 | Mio € | 259       | 347       |
| Presta Steering                       | Mio € | 706       | 918       |
| Bilstein-Gruppe                       | Mio € | 1.147     | 1.543     |
| Sonstige Beteiligungen/Konsolidierung | Mio € | – 13      | – 23      |
| EBT                                   | Mio € | – 458     | 220       |
| Bereinigtes EBT                       | Mio € | – 148     | 269       |
| Investitionen                         | Mio € | 542       | 288       |
| Mitarbeiter (30.09.)                  |       | 27.973    | 29.144    |



Die Business Area Components Technology umfasst das Liefer- und Leistungsspektrum von Hightech-Komponenten für Windkraftanlagen und die Automobil- und Baumaschinenindustrie sowie für Anwendungen im allgemeinen Maschinenbau. Schwerpunkte unserer Aktivitäten für die Automobilindustrie liegen in den Geschäftsfeldern Kurbel- und Nockenwellen, Lenksysteme, Dämpfer, Federn und Montage von Achsmodulen.

**i**

Der Auftragseingang von Components Technology verzeichnete 2009/2010 ein Plus von 35 %.

### Positive Geschäftsentwicklung

Components Technology verzeichnete im abgelaufenen Geschäftsjahr eine erfreulich positive Geschäftsentwicklung. Gegenüber dem schwachen und durch die Wirtschafts- und Finanzkrise geprägten Vorjahr stieg der Umsatz um 24 % auf 5,7 Mrd €; der Auftragseingang legte sogar um 35 % auf ebenfalls 5,7 Mrd € zu.

Wesentliche Ursache für die gute Geschäftsentwicklung war die Nachfragebelebung in der Automobilindustrie, zu der auch die zeitlich begrenzten staatlichen Förderprogramme in nahezu allen europäischen Ländern, in den USA, Brasilien und China beigetragen haben. Positive Effekte resultierten auch aus verringerten Lagerbeständen unserer Kunden.

Nach dem hohen Verlust im Vorjahr wurde im abgelaufenen Berichtsjahr ein Gewinn vor Steuern von 220 Mio € erzielt. Zu dieser positiven Entwicklung trugen neben der konjunkturellen Nachfragebelebung auch die im Vorjahr eingeleiteten und im Berichtsjahr weiter umgesetzten Restrukturierungs- und Kostensenkungsprogramme bei. Diese Maßnahmen beinhalten neben temporären Personalanpassungen hauptsächlich strukturelle Kapazitätsanpassungen, wie z.B. die Schließung von Werken in Europa und den USA. Das Bereinigte EBT betrug 269 Mio €.

Ende September 2010 beschäftigte Components Technology 29.144 Mitarbeiter, 4 % mehr als ein Jahr zuvor. Dank der positiven konjunkturellen Entwicklung wurden insbesondere in Brasilien, China und der Nafta-Region zusätzliche Mitarbeiter eingestellt; gegenläufig wirkte ein strukturbedingter Rückgang der Belegschaft in Deutschland und im sonstigen Europa.

### Entwicklung der Operating Units

Die Geschäftsentwicklung der Operating Units von Components Technology verlief 2009/2010 insgesamt positiv.

Das Automobilzuliefergeschäft zeigte eine erfreuliche Entwicklung. Der Umsatz übertraf deutlich den krisenbedingt schwachen Wert des Vorjahres. Im Geschäft von Presta Camshafts, Presta Steering und der Bilstein-Gruppe mit gebauten Nockenwellen, Lenksystemen, Dämpfern, Federn und der Montage von Achsmodulen wurden auf Grund der erhöhten Abrufe aus der Automobilindustrie höhere Umsätze realisiert. Presta Camshafts und Presta Steering konnten ihr Ergebnis verbessern und erzielten einen Gewinn vor Steuern. Das EBT der Bilstein-Gruppe war dagegen durch Restrukturierungs- und Wertminderungsaufwendungen belastet.

Die Forging Group erreichte u.a. mit geschmiedeten Kurbelwellen für PKW und Nutzfahrzeuge einen deutlich höheren Umsatz und kehrte in die Gewinnzone zurück. Insbesondere auf dem brasilianischen und US-Markt war eine höhere Nachfrage zu verzeichnen. Auch in Europa setzte eine Marktbelebung ein, die zu steigenden Umsätzen führte.

Die amerikanischen Gießereien von Waupaca, die Komponenten für PKW, Nutzfahrzeuge und übrige Anwendungsfelder produzieren, profitierten von der höheren Marktnachfrage, weiteren Einsparungen im Health-Care-Programm und strukturellen Kapazitätsanpassungen. Im Vergleich zum Vorjahr wurden ein erheblicher Umsatzzuwachs und ein Gewinn vor Steuern erzielt.

Im Baumaschinengeschäft von Berco belebte sich die Nachfrage ab Mitte des Berichtsjahres. Ausgehend von einem niedrigen Basisniveau im Vorjahr wurde der Umsatz im 2. Halbjahr nahezu verdoppelt, u.a. weil Kunden ihre zuvor verringerten Lagerbestände wegen der höheren Nachfrage wieder aufbauten. Auch im Geschäftsjahresvergleich konnte das Geschäftsvolumen ausgeweitet werden. Zur



weiteren Verbesserung der Wettbewerbsfähigkeit wurde ein umfangreiches Kostensenkungsprogramm mit strukturellen Kapazitätsanpassungen eingeleitet. Wegen des schwachen 1. Halbjahres, Restrukturierungs- und Wertminderungsaufwendungen sowie gestiegener Materialkosten blieb eine Rückkehr in die Gewinnzone aus.

Die noch schwache Nachfrage im allgemeinen Maschinenbau sowie ein am kurzfristigen Bedarf orientiertes Abrufverhalten der Kunden aus der Windenergiebranche führten im 1. Halbjahr in den Bereichen Großwälzlager und Ringe von Rothe Erde zu einem rückläufigen Auftragseingang. Im 2. Halbjahr belebte sich die Ordertätigkeit gegenüber dem schwachen Vorjahreszeitraum, so dass im Geschäftsjahresvergleich ein höherer Auftragseingang erzielt wurde. Der Umsatz erreichte nicht das Vorjahresniveau, das 2. Halbjahr zeigte jedoch ansteigende Tendenzen. Rothe Erde erwirtschaftete ein erfreuliches Ergebnis vor Steuern, konnte jedoch umsatzbedingt nicht an den Gewinn vor Steuern des Vorjahres anschließen.

### Wesentliche Ereignisse

Vor dem Hintergrund der Marktentwicklung wurde es notwendig, die Kapazitäten der veränderten Nachfrage anzupassen. Werksschließungen betrafen die Forging Group in Deutschland, Frankreich und den USA sowie Presta Steering in den USA. Bei der Bilstein-Gruppe sind ebenfalls strukturelle Kapazitätsanpassungen mit Werksschließungen in Deutschland und Spanien in Umsetzung. Auf Grund des Nachfrageeinbruchs in den USA wurde bei der US-amerikanischen Gießereigruppe Waupaca das Werk in Etowah, Tennessee, stillgesetzt. Trotzdem konnte Waupaca die führende Marktposition als größte unabhängige Eisengießerei in den USA behaupten.

Diese Maßnahmen haben die Produktivität und Rentabilität der Operating Units im Geschäftsjahresverlauf 2009/2010 nachhaltig gesteigert.

### Investitionen

Components Technology investierte im Berichtsjahr 272 Mio € in Sachanlagen und immaterielle Vermögenswerte bei Abschreibungen von 277 Mio €. Die Schwerpunkte lagen auf der Erhaltung der Betriebsbereitschaft sowie der Fortführung bereits begonnener Investitionsvorhaben. Investiert wurde überwiegend in Deutschland, China, Nord- und Südamerika sowie Indien.

Die Bilstein-Gruppe errichtet in Chattanooga, USA, ein neues Werk zur Montage kompletter Vorder- und Hinterachsen für einen bedeutenden deutschen Automobilhersteller. Darüber hinaus wurde am Standort in Mexiko in die Fertigung von Stabilisatoren investiert.

Presta Steering hat das neue elektromechanische Lenksystem ParPAS zur Serienreife entwickelt und die Markteinführung gestartet. Die Produktionsanläufe für das EPAS-Lenksystem erstrecken sich über den Zeitraum Mai 2010 bis September 2011. Insgesamt sollen jährlich rund 800.000 Lenksysteme ausgeliefert werden. Die hierzu notwendigen Umstrukturierungen an den Produktionsstätten sind erfolgt.

Presta Camshafts erweiterte dank zahlreicher Neuaufträge seine Produktionskapazitäten am Standort Ilsenburg sowie in China. Auf Basis der weiterhin positiven Entwicklungsprognosen im Windenergiesektor wurde bei Rothe Erde das vor zwei Jahren aufgelegte Sonderinvestitionsprogramm fortgeführt.

Die Forging Group hat mit dem Aufbau eines Bearbeitungsstandorts für LKW-Kurbelwellen in Indien begonnen, um zukünftig indische Hersteller von LKW-Motoren vor Ort beliefern zu können.

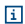

Bilstein errichtet in den USA ein neues Werk zur Achsenmontage.



## Marine Systems

### MARINE SYSTEMS IN ZAHLEN

|                                       |       | 2008/2009 | 2009/2010 |
|---------------------------------------|-------|-----------|-----------|
| Auftragseingang                       | Mio € | 870       | 531       |
| Umsatz                                | Mio € | 1.594     | 1.211     |
| Naval                                 | Mio € | 1.047     | 699       |
| Shipyards and Services                | Mio € | 574       | 527       |
| Sonstige Beteiligungen/Konsolidierung | Mio € | - 27      | - 15      |
| EBT                                   | Mio € | - 554     | 38        |
| Bereinigtes EBT                       | Mio € | - 90      | - 35      |
| Investitionen                         | Mio € | 37        | 8         |
| Mitarbeiter (30.09.)                  |       | 7.770     | 5.488     |

Mit der Restrukturierung der Werften positioniert sich Marine Systems als einer der führenden, global agierenden europäischen Systemanbieter speziell für U-Boote und Marineschiffe.

#### Auftragslage und Umsatz rückläufig – Ergebnis verbessert

Das Marktumfeld für Marine Systems war 2009/2010 überwiegend ungünstig. Der Auftragseingang in den Märkten für Handelsschiffe und Megayachten kam vorübergehend vollständig zum Erliegen. Belastet hat auch die angespannte Lage der öffentlichen Haushalte. In den letzten Monaten haben sich allerdings die Frachtraten für Handelsschiff tonnagen deutlich erhöht; dies hat auch den Markt für Reparaturen, Erneuerungen und Umbauten spürbar belebt.

Der Auftragseingang fiel um 39 % auf 531 Mio €. Der Umsatz von Marine Systems lag mit 1,2 Mrd € um 24 % unter dem Vorjahreswert. Ausschlaggebend war der Wegfall aller Umsätze aus den im September 2009 gekündigten U-Bootaufträgen für Griechenland.

Das Ergebnis vor Steuern verbesserte sich gegenüber dem Vorjahr um 592 Mio € auf 38 Mio €. Es wurde wesentlich durch den Entkonsolidierungseffekt von Hellenic Shipyards in Griechenland bestimmt. Bereinigt um diesen Sondereffekt wurde ein negatives EBT erzielt.

Die Zahl der Mitarbeiter hat sich im letzten Geschäftsjahr um 29 % verringert. Am 30. September 2010 waren 5.488 Mitarbeiter an den Standorten Hamburg, Kiel, Malmö und Karlskrona beschäftigt. Nach Abschluss der nachfolgend dargestellten Restrukturierungsschritte wird sich die Belegschaft nochmals um rund 2.250 Mitarbeiter reduzieren.

#### Entwicklung der Operating Units

Die Operating Unit Naval erhielt nur wenige Neubestellungen. Zu den neu akquirierten Aufträgen gehörte der Designauftrag zur Entwicklung der neuen Generation schwedischer U-Boote (A26) aus dem Frühjahr 2010. Darüber hinaus konnten im Wesentlichen kleinere Projekte gewonnen werden. Der bereits im Juli 2009 paraphierte Auftrag über sechs Materialpakete zum Bau von U-Booten der Exportklasse 214 für die türkische Marine war auf Grund langwieriger Finanzierungsverhandlungen zwischen Endkunden und Bankenkonsortium auch zum Ende des Berichtsjahres noch nicht effektiv.

Eine wesentliche Ablieferung betrifft das erste U-Boot der Klasse 214 für Portugal. Der sich zwischenzeitlich wiederbelebende Welthandel mit steigenden Frachtraten machte es möglich, vier von Kunden stornierte Containerschiffe an Dritte zu veräußern.

In der Operating Unit Shipyards and Services war das Geschäftsjahr durch die Fertigstellung dreier Megayachten gekennzeichnet. Im Juni 2010 wurde die grundüberholte historische Yacht „Nahlin“ und im September die „Orca“ an die Kunden übergeben. Als dritte Yacht wurde die „Eclipse“ ebenfalls im September fertig- und zur Abnahme bereitgestellt.

Das Reparaturgeschäft entwickelte sich zeitweise schwächer, während sich der Markt für Komponenten wider Erwarten gut behauptete.

**i**

Das EBT von Marine Systems war 2009/2010 mit 38 Mio € positiv.



### Restrukturierung der Werften

Die Restrukturierung der Business Area Marine Systems wurde 2009/2010 weiter vorangetrieben: ThyssenKrupp Marine Systems hat auf die weltweite Schiffbaukrise an allen Standorten mit zum Teil erheblichen Kapazitätsabbau- und Kostensenkungsmaßnahmen reagiert und wird die Aktivitäten konsequent auf den Marineschiffbau ausrichten.

Bereits im Oktober 2009 wurde ein Kaufvertrag mit SIAG Schaaf Industrie geschlossen und damit die Transformation des Standortes Emden der Blohm + Voss Nordseewerke zu einem zukunftsfähigen Hightech-Standort für Offshore-Technologie begonnen. Das Marineüberwassergeschäft von Blohm + Voss Nordseewerke umfasst als Generalunternehmer die Bereiche Design, Einkauf und Projektmanagement.

Des Weiteren steht ThyssenKrupp Marine Systems vor der Umsetzung der am 13. April 2010 unterzeichneten Vereinbarungen mit der Abu Dhabi MAR-Gruppe. Abu Dhabi MAR beabsichtigt die Übernahme von 100 % der Anteile der Blohm + Voss Shipyards und damit des Megayachtbaus sowie von zunächst 80 % der Anteile der Schiffsreparatur und Komponentenfertigung. Zugleich wird das Marineüberwassergeschäft in ein 50/50-Joint-Venture mit der Abu Dhabi MAR-Gruppe eingebracht. Die entsprechenden kartell- und außenwirtschaftsrechtlichen Genehmigungsprozesse sind bereits abgeschlossen, das Closing ist in der ersten Hälfte 2010/2011 geplant.

Bereits realisiert wurde der Verkauf von 75,1 % der Anteile an der griechischen Werft Hellenic Shipyards an einen der Anteilseigner der Abu Dhabi MAR-Gruppe. Hellenic Shipyards ist damit im September 2010 aus dem Konsolidierungskreis des Konzerns ausgeschieden.

Der Verkauf ist Teil einer Gesamtlösung mit der griechischen Regierung und Abu Dhabi MAR, die zudem im Rahmen neuer Vereinbarungen die Abnahme bzw. Fertigstellung der bislang gebauten U-Boote sowie die Bestellung zwei weiterer U-Boote der Klasse 214 vorsieht. Die entsprechenden Verträge traten Ende Oktober 2010 in Kraft.

ThyssenKrupp Marine Systems konzentriert sich damit künftig auf den militärischen Schiffbau mit Schwerpunkt U-Boote und wird dabei auch von der neuen Partnerschaft mit ihren Vermarktungsperspektiven profitieren können.

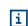

ThyssenKrupp Marine Systems konzentriert sich künftig auf den militärischen Schiffbau.

### Investitionen

Im Berichtsjahr beliefen sich die Investitionen in Sachanlagen und immaterielle Vermögenswerte von Marine Systems auf 8 Mio € bei Abschreibungen von 24 Mio €. Sie dienten im Wesentlichen der Aufrechterhaltung der Betriebsbereitschaft. Hervorzuheben sind eine Hallenmodernisierung bei Howaldtswerke-Deutsche Werft infolge der künftig gemeinsamen Infrastrukturnutzung am Standort Kiel-Gaarden mit Abu Dhabi MAR sowie IT-Investitionen bei Kockums für die Bearbeitung des Designauftrags A26 der schwedischen Marine.

## Bereich Corporate der ThyssenKrupp AG

Der Bereich Corporate umfasst die Konzernverwaltung einschließlich der Führung der Business Areas. Ferner sind hier die Business-Services-Aktivitäten in den Bereichen Finanzen, Kommunikation, IT und Personal erfasst. Hinzu kommen die nicht betriebsnotwendigen Immobilien sowie inaktive Gesellschaften. Der Umsatz, den Corporate-Gesellschaften mit marktgängigen Dienstleistungen für Konzernunternehmen erbringen, erreichte in der Berichtszeit 131 Mio € nach 127 Mio € im Vorjahr.

Das Ergebnis vor Steuern von Corporate beträgt –609 Mio € und hat sich gegenüber dem Vorjahr um 75 Mio € verschlechtert. Dies resultiert aus Einmalaufwendungen im Zusammenhang mit dem Umzug der Hauptverwaltungen nach Essen sowie aus einem geringeren Finanzergebnis. Darüber hinaus führte die Übernahme von zusätzlichen Verwaltungsaufgaben durch die ThyssenKrupp AG und die Business Service Center zu einer Erhöhung des Aufwands bei Corporate; dem stehen entsprechend geringere Aufwendungen bei den Business Areas gegenüber.

Die Position Konsolidierung enthält im Wesentlichen die Ergebnisse aus der Eliminierung der Konzernzwischengewinne.



# Finanz- und Vermögenslage

Unsere solide Finanz- und Vermögensbasis hat sich im Berichtsjahr bewährt und zukunftsweisende Investitionen möglich gemacht. Die Zahlen der Kapitalflussrechnung und die Bilanzstruktur spiegeln die Geschäftsbelegung in allen Konzernbereichen wider. Zum Erfolg hat auch die zentrale Finanzierung beigetragen, die Kapitalbeschaffung und -anlage für den Konzern optimierte.

## Zentrale Finanzierung und Liquiditätssicherung

Die Finanzierung des Konzerns erfolgt grundsätzlich zentral durch die ThyssenKrupp AG; sie stellt die Liquidität der Konzerngesellschaften im Wesentlichen über die Mittelbereitstellung im Rahmen des Konzernfinanzverkehrs sowie über die Vermittlung und Verbürgung von Krediten oder über Finanzierungshilfen in Form von Patronatserklärungen sicher. Die Liquiditätssicherung geschieht auf der Grundlage einer mehrjährigen Finanzplanung sowie einer monatlich rollierenden Liquiditätsplanung mit einem Planungszeitraum von bis zu einem Jahr. Alle konsolidierten Konzerngesellschaften sind in diese Planung einbezogen.

Wichtigste Liquiditätsquelle des Konzerns ist die operative Geschäftstätigkeit unserer Konzerngesellschaften mit den daraus resultierenden Einzahlungen. Im Rahmen unserer Cash-Management-Systeme werden die Liquiditätsüberschüsse einzelner Konzerngesellschaften genutzt, um den Finanzbedarf anderer Konzerngesellschaften zu decken. Der zentrale konzerninterne Finanzausgleich verringert das Volumen der benötigten Fremdfinanzierung und unseren Zinsaufwand. Zusätzlich reduzieren wir kostenpflichtige Bankumsätze durch die Verrechnung von Lieferungen und Leistungen zwischen Konzerngesellschaften über konzerninterne Finanzkonten.

Um das benötigte Fremdfinanzierungsvolumen zu beschaffen, nehmen wir fest zugesagte Kreditlinien in Anspruch, und zwar in unterschiedlichen Währungen und mit unterschiedlichen Laufzeiten. Darüber hinaus werden Geld- und Kapitalmarktinstrumente sowie selektiv außerbilanzielle Finanzierungsinstrumente – z.B. Forderungsverkaufsprogramme oder Operating Leases – genutzt. Informationen zu den frei verfügbaren Kreditlinien sind unter Anhang-Nr. 17 auf Seite 229 zu finden.

Durch die zentrale Finanzierung verbessert sich unsere Verhandlungsposition gegenüber Banken und anderen Marktteilnehmern, so dass wir leichter Kapital zu bestmöglichen Konditionen aufnehmen oder anlegen können.

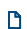



### Emittenten-Ratings für ThyssenKrupp seit 2001

Emittenten-Ratings erleichtern den Zugang zu den internationalen Kapitalmärkten. ThyssenKrupp verfügt deshalb seit 2001 über Emittenten-Ratings der Rating-Agenturen Moody's und Standard & Poor's (S&P) sowie seit 2003 von Fitch. Im 1. Quartal 2009/2010 hatte Standard & Poor's unser Langfrist-Rating auf BB+ heruntergestuft, womit der Konzern bei dieser Ratingagentur den Investment-Grade-Status verlor. Bei Moody's und Fitch befindet sich unser Rating dagegen weiterhin im Investment-Grade-Bereich. Am 30. Juli 2010 stufte Fitch den Ausblick für das Rating BBB- von „negativ“ auf „stabil“ herauf.

Derzeit wird die Kreditwürdigkeit von ThyssenKrupp von den Rating-Agenturen wie folgt bewertet:

|                   | Langfrist-Rating | Kurzfrist-Rating | Ausblick |
|-------------------|------------------|------------------|----------|
| Standard & Poor's | BB+              | B                | stabil   |
| Moody's           | Baa3             | Prime-3          | negativ  |
| Fitch             | BBB-             | F3               | stabil   |

Hochstufungen der von den Rating-Agenturen vergebenen Ratings führen erfahrungsgemäß zu geringeren Refinanzierungskosten, während sich Herabstufungen grundsätzlich negativ auswirken. Den Investment-Grade-Status bei Standard & Poor's wiederzuerlangen ist deshalb ein wichtiges Ziel.

## Analyse der Kapitalflussrechnung

Der in der Kapitalflussrechnung betrachtete Zahlungsmittelfonds entspricht der Bilanzposition „Zahlungsmittel und Zahlungsmitteläquivalente“.

2009/2010 ergab sich ein Mittelzufluss aus der operativen Geschäftstätigkeit von 868 Mio € nach 3.699 Mio € im Vorjahr. Wesentliche Ursache für den deutlichen Rückgang um 2.831 Mio € war die im Vergleich zum Vorjahr insgesamt um 5.422 Mio € verschlechterte Mittelbindungssituation bei den Vorräten, Forderungen und Verbindlichkeiten aus Lieferungen und Leistungen sowie bei den sonstigen Rückstellungen. Während im Vorjahr noch eine Mittelfreisetzung in Höhe von 4.292 Mio € erzielt wurde, ergab sich im Berichtsjahr eine Mittelbindung von 1.130 Mio €, die insbesondere aus der eingetretenen Nachfragebelebung und aus Inanspruchnahmen von Rückstellungen für Restrukturierungsmaßnahmen resultierte. Gegenläufig wirkte der um 3.260 Mio € auf 2.522 Mio € stark verbesserte Jahresüberschuss vor Abschreibungen, Zuschreibungen und latenten Steuern.

Der Mittelabfluss aus Investitionstätigkeit verringerte sich im Vergleich zum Vorjahr um 920 Mio € auf 2.958 Mio €. Ursache hierfür waren die um 522 Mio € auf 3.299 Mio € verminderten Auszahlungen für Investitionen in Sachanlagen (einschließlich geleisteter Anzahlungen und als Finanzinvestition gehaltener Immobilien) sowie die insbesondere durch die Veräußerungen von ThyssenKrupp Industrieservice und ThyssenKrupp Safway insgesamt um 473 Mio € erhöhten Einzahlungen aus dem Verkauf von bislang konsolidierten Gesellschaften. Gegenläufig wirkten um 50 Mio € verminderte Einzahlungen aus dem Verkauf von Sachanlagen und als Finanzinvestition gehaltenen Immobilien.

Der Free Cash-Flow, d.h. die Summe aus Operating Cash-Flow und Cash-Flow aus Investitionstätigkeit, wies wie im Vorjahr einen negativen Wert auf. Im Vergleich zum Vorjahr ergab sich eine deutliche Erhöhung des negativen Free Cash-Flows um 1.911 Mio € auf -2.090 Mio €, die hauptsächlich auf die im Vergleich zum Vorjahr eingetretene erhebliche Verringerung des Mittelzuflusses aus der operativen Geschäftstätigkeit zurückzuführen war.

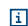

Der Free Cash-Flow war wie im Vorjahr negativ.



Der Mittelzufluss aus Finanzierungstätigkeit belief sich im Berichtsjahr auf 255 Mio €, nach einem Mittelzufluss von 2.824 Mio € im Vorjahr. Der sich im Vergleich zum Vorjahr insgesamt ergebende Mittelabfluss von 2.569 Mio € resultierte hauptsächlich aus den im Berichtsjahr erfolgten Rückzahlungen von Finanzschulden in Höhe von 153 Mio €, denen im Vorjahr noch eine Aufnahme von Finanzschulden in Höhe von 3.222 Mio € gegenüberstand. Gegenläufig wirkten im Vergleich zum Vorjahr verminderte Dividendenzahlungen (467 Mio €) sowie geringere Auszahlungen für den Erwerb von Anteilen an bereits konsolidierten Unternehmen (146 Mio €). Darüber hinaus ergaben sich 2009/2010 Einzahlungen in Höhe von 500 Mio € in das Eigenkapital als Folge der Erhöhung des Anteils von Vale S.A. an der ThyssenKrupp CSA Siderúrgica do Atlântico Ltda. Im Vorjahr wurden in diesem Zusammenhang 465 Mio € in das Eigenkapital eingezahlt.

#### VERÄNDERUNG DER ZAHLUNGSMITTEL UND ZAHLUNGSMITTELÄQUIVALENTE in Mio €

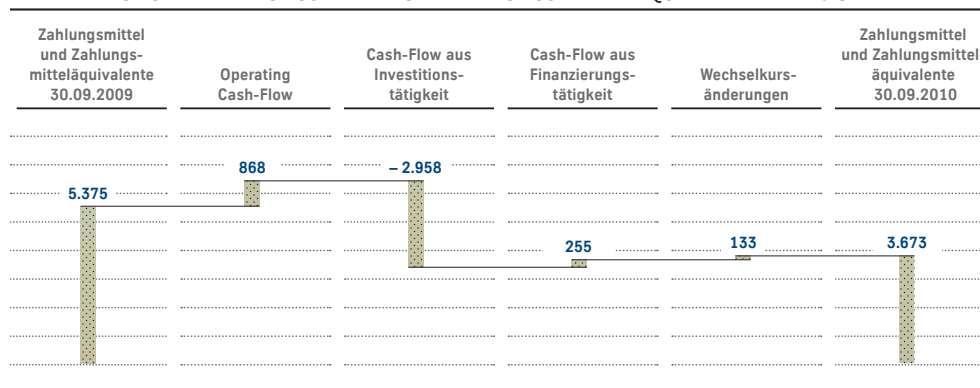

technisch bedingt teilweise nicht maßstabsgerecht

## Analyse der Bilanzstruktur

1

Die Bilanzsumme erhöhte sich zum 30. September 2010 um 2,3 Mrd €.

Insgesamt erhöhte sich die Bilanzsumme gegenüber dem 30. September 2009 um 2.345 Mio € auf 43.712 Mio €. Dieser Anstieg war in Höhe von 1.025 Mio € durch Effekte aus der Währungsumrechnung, insbesondere auf Grund der rückläufigen US-Dollarkursentwicklung im Berichtszeitraum, beeinflusst.

Die langfristigen Vermögenswerte erhöhten sich um insgesamt 2.306 Mio €. Der Anstieg betraf mit 2.529 Mio € hauptsächlich eine Zunahme der Sachanlagen. Neben Wechselkurseffekten, die einen Anstieg um 265 Mio € bewirkten, trugen insbesondere die beiden Großprojekte in Brasilien und den USA zu der Erhöhung bei; eine Umgliederung in zur Veräußerung vorgesehene Vermögenswerte wirkte mit 52 Mio € gegenläufig. Der Anstieg der immateriellen Vermögenswerte um 9 Mio € enthält zwei wesentliche gegenläufige Effekte; einem wechsellkursbedingten Anstieg von 162 Mio € stand ein Rückgang in Höhe von 131 Mio € aus Umgliederungen in zur Veräußerung vorgesehene Vermögenswerte gegenüber. Der Rückgang der sonstigen nicht finanziellen Vermögenswerte um 255 Mio € betraf hauptsächlich geleistete Anzahlungen, die im Zusammenhang mit dem Stahlwerk in Brasilien in Sachanlagen umgeli edert wurden.

Die kurzfristigen Vermögenswerte stiegen im Vergleich zum Vorjahr um 39 Mio € an. Deutlichen Zunahmen bei den Vorräten und Forderungen aus Lieferungen und Leistungen sowie einem Anstieg der zur Veräußerung vorgesehenen Vermögenswerte standen deutliche Verminderungen der Zahlungsmittel und Zahlungsmitteläquivalente sowie der sonstigen finanziellen Vermögenswerte gegenüber.

Die Vorräte stiegen insgesamt um 1.527 Mio € an. Als Folge der im Geschäftsjahr spürbar verbesserten Geschäftslage ergaben sich preis- und mengenbedingte Erhöhungen in den Business Areas Steel Europe (605 Mio €) und Materials Services (145 Mio €). Die Zunahme in der Business Area Steel



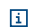

Die Forderungen aus Lieferungen und Leistungen nahmen 2009/2010 um 762 Mio € zu.

Americas (386 Mio €) stand im Zusammenhang mit der erfolgten Produktionsaufnahme des brasilianischen Stahlwerks sowie der Inbetriebnahme des Weiterverarbeitungswerks in den USA. Der deutliche Anstieg der Vorräte in der Business Area Stainless Global (419 Mio €) resultierte aus Rohstoffpreis- und Mengensteigerungen. Wechselkurseffekte führten zu einer Erhöhung der Vorräte um 145 Mio €. Durch Umgliederung in zur Veräußerung vorgesehene Vermögenswerte ergab sich eine Verminderung um 59 Mio €.

Die Forderungen aus Lieferungen und Leistungen nahmen um 762 Mio € zu. Als Folge der Nachfragebelegung im Berichtszeitraum ergaben sich Erhöhungen in den Business Areas Steel Europe (202 Mio €), Materials Services (295 Mio €) sowie Components Technology (151 Mio €). Darüber hinaus war ein wechsellkursbedingter Anstieg in Höhe von 166 Mio € zu verzeichnen. Vermindernd wirkten Umgliederungen in zur Veräußerung vorgesehene Vermögenswerte in Höhe von 75 Mio €.

Die innerhalb der kurzfristigen Vermögenswerte ausgewiesenen sonstigen finanziellen Vermögenswerte verminderten sich deutlich um 568 Mio €. Der Rückgang resultierte insbesondere aus den im Geschäftsjahr 2009/2010 erfolgten Eigenkapitaleinzahlungen bei der ThyssenKrupp CSA Siderúrgica do Atlântico Ltda. durch den Mitgesellschafter Vale S.A.

Die kurzfristigen sonstigen nicht finanziellen Vermögenswerte lagen zum 30. September 2010 mit 1.646 Mio € um 78 Mio € unter dem Niveau des Vorjahres. Zunahmen resultierten aus Wechselkurseffekten (51 Mio €) sowie aus erhöhten Steuererstattungsansprüchen (150 Mio €). Gegenläufig wirkten verminderte geleistete Anzahlungen im Zusammenhang mit dem Einkauf von Vorräten (215 Mio €) sowie Umgliederungen in die zur Veräußerung vorgesehenen Vermögenswerte in Höhe von 73 Mio €.

Der Rückgang der Zahlungsmittel und Zahlungsmitteläquivalente um 1.969 Mio € auf 3.380 Mio € resultierte hauptsächlich aus dem im Berichtszeitraum negativen Free Cash-Flow in Höhe von –2.090 Mio € sowie mit 183 Mio € aus Dividendenzahlungen. Umgliederungen in die zur Veräußerung vorgesehenen Vermögenswerte führten darüber hinaus zu einem Rückgang von 293 Mio €. Gegenläufig wirkten Wechselkurseffekte in Höhe von 131 Mio € sowie die im Berichtszeitraum erfolgte Eigenkapitaleinzahlung in Höhe von 500 Mio € bei der ThyssenKrupp CSA Siderúrgica do Atlântico Ltda. im Zusammenhang mit der Anteilserhöhung des Mitgesellschafters Vale S.A.

Die zur Veräußerung vorgesehenen Vermögenswerte erhöhten sich um 302 Mio €. Zum 30. September 2009 wurden hier Vermögenswerte in Höhe von 491 Mio € ausgewiesen, die mit den im Oktober 2009 eingeleiteten Veräußerungen von ThyssenKrupp Industrieservice und ThyssenKrupp Safway in der Business Area Materials Services im Zusammenhang standen; diese eingeleiteten Verkäufe wurden bis Mitte Dezember 2009 abgeschlossen. Im Rahmen der weiteren Portfoliooptimierung wurde im April 2010 der Verkauf von Teilen der Business Area Marine Systems eingeleitet. Weiterhin wurden zum Ende des Geschäftsjahres 2009/2010 die Verkäufe der zur Business Area Elevator Technology gehörenden iranischen Gesellschaft ThyssenKrupp Assanbar PJSC sowie der spanischen Gesellschaft ThyssenKrupp Xervon S.A. aus der Business Area Materials Services eingeleitet; der Verkauf von ThyssenKrupp Xervon S.A. wurde im Oktober 2010 abgeschlossen. Zum 30. September 2010 führten die eingeleiteten Verkäufe zu einem Ausweis von zur Veräußerung gehaltenen Vermögenswerten in Höhe von 726 Mio €; insgesamt wurden in diesem Zusammenhang langfristige Vermögenswerte von 202 Mio € sowie kurzfristige Vermögenswerte von 524 Mio € umgegliedert. Darüber hinaus waren in den zur Veräußerung vorgesehenen Vermögenswerten am 30. September 2010 Sachanlagen in Höhe von 67 Mio € aus der Business Area Steel Americas enthalten.

Die Zunahme des Eigenkapitals um 692 Mio € auf 10.388 Mio € war hauptsächlich auf den im Geschäftsjahr erzielten Jahresüberschuss in Höhe von 927 Mio € sowie auf die im Sonstigen Ergebnis insgesamt erfassten unrealisierten Gewinne aus der Währungsumrechnung (483 Mio €) und aus derivativen Finanzinstrumenten (45 Mio € nach Steuern) zurückzuführen. Gegenläufig wirkten insbesondere



Gewinnausschüttungen (183 Mio €) sowie im Sonstigen Ergebnis insgesamt erfasste versicherungsmathematische Verluste aus Pensionen und ähnlichen Verpflichtungen (647 Mio € nach Steuern). Der in der Zunahme des Eigenkapitals enthaltene Anstieg der nicht beherrschenden Anteile um 119 Mio € betraf mit 103 Mio € den Jahresüberschuss im Berichtszeitraum, der auf die nicht beherrschenden Anteile entfällt. Der weitere Anstieg resultierte insbesondere aus den auf die nicht beherrschenden Anteile entfallenden unrealisierten Gewinnen aus der Währungsumrechnung (27 Mio €) sowie aus derivativen Finanzinstrumenten (28 Mio € nach Steuern); gegenläufig wirkten Gewinnausschüttungen (44 Mio €).

Die langfristigen Verbindlichkeiten verringerten sich insgesamt um 600 Mio €. Hierin enthalten war ein Rückgang der Finanzschulden um 1.003 Mio €, der mit 749 Mio € die Umgliederung einer Anleihe in die kurzfristigen Finanzschulden betraf; weitere 157 Mio € resultierten aus einer Verminderung der Verbindlichkeiten gegenüber Kreditinstituten. Gegenläufig wirkte eine Zunahme der Rückstellungen für Pensionen und ähnliche Verpflichtungen um 561 Mio €, die mit 122 Mio € Effekte aus der Währungsumrechnung betraf. Darüber hinaus ergab sich eine deutliche Zunahme in Höhe von 878 Mio € insbesondere auf Grund der im Rahmen der Neubewertung der Pensions- und Gesundheitsfürsorgeverpflichtungen zum 30. September 2010 berücksichtigten aktualisierten Zinssätze; mindernd wirkten Arbeitgeberbeiträge in das Planvermögen (171 Mio €), Unternehmensverkäufe (60 Mio €), eine Abnahme der in den sonstigen pensionsähnlichen Verpflichtungen enthaltenen Rückstellungen für Verpflichtungen aus Altersteilzeitvereinbarungen (74 Mio €) sowie Umgliederungen in Verbindlichkeiten in Verbindung mit zur Veräußerung vorgesehenen Vermögenswerten (125 Mio €). Der höhere Rückgang der passiven latenten Steuern um 168 Mio € gegenüber dem Rückgang der aktiven latenten Steuern um 48 Mio € steht im Wesentlichen im Zusammenhang mit der steuerlichen Aktivierung von Anlaufkosten bei ThyssenKrupp CSA Siderúrgica do Atlântico Ltda. und steuerlichen Abweichungen im Rahmen der Pensionsbewertung.

Die kurzfristigen Verbindlichkeiten stiegen insgesamt um 2.253 Mio € an. Dieser Anstieg betraf mit 973 Mio € die kurzfristigen Finanzschulden insbesondere als Folge der erwähnten Umgliederung einer Anleihe aus den langfristigen Finanzschulden sowie aus um 134 Mio € erhöhten Verbindlichkeiten gegenüber Kreditinstituten.

Der Rückgang der sonstigen kurzfristigen Rückstellungen um 262 Mio € betraf hauptsächlich die Inanspruchnahme von Rückstellungen als Folge der Umsetzung der im Konzern während des Geschäftsjahres 2008/2009 eingeleiteten Restrukturierungsmaßnahmen. Mindernd wirkten darüber hinaus Umgliederungen in Verbindlichkeiten in Verbindung mit zur Veräußerung vorgesehenen Vermögenswerten in Höhe von 53 Mio €.

Wesentliche Ursache für den Rückgang der laufenden Ertragsteuerverbindlichkeiten um 262 Mio € war ein Überhang der Ertragsteuerzahlungen gegenüber dem laufenden Ertragsteueraufwand.

Die Verbindlichkeiten aus Lieferungen und Leistungen erhöhten sich stark um 1.242 Mio €. Zunahmen ergaben sich in der Business Area Stainless Global (242 Mio €), die hauptsächlich aus signifikanten Zahlungszielverlängerungen durch Rohstofflieferanten und höheren Einkaufspreisen resultierten, sowie bei den Business Areas Steel Europe (304 Mio €), Materials Services (459 Mio €) und Components Technology (189 Mio €) als Folge der im Berichtszeitraum eingetretenen Nachfragebelebung. Darüber hinaus führten Wechselkurseffekte zu einem Anstieg von 80 Mio €. Gegenläufig wirkte die Umgliederung von 60 Mio € in Verbindlichkeiten in Verbindung mit zur Veräußerung vorgesehenen Vermögenswerten.

Der Anstieg der kurzfristigen nicht finanziellen Verbindlichkeiten um 250 Mio € enthält insbesondere eine Erhöhung der Verbindlichkeiten aus Fertigungsaufträgen in der Business Area Plant Technology um 286 Mio €. Wechselkurseffekte bewirkten darüber hinaus eine Zunahme um 149 Mio €. Umgliederungen in Verbindlichkeiten in Verbindung mit zur Veräußerung vorgesehenen Vermögenswerten führten zu einem Rückgang von 232 Mio €.

[1]

Die Verbindlichkeiten aus Lieferungen und Leistungen stiegen 2009/2010 um 1,2 Mrd €.



Die Verbindlichkeiten in Verbindung mit zur Veräußerung vorgesehenen Vermögenswerten erhöhten sich insgesamt um 256 Mio €. Der im April 2010 eingeleitete Verkauf von Teilen der Business Area Marine Systems sowie die zum Ende des Geschäftsjahres 2009/2010 eingeleiteten Verkäufe von ThyssenKrupp Assanbar PJSC (Business Area Elevator Technology) sowie ThyssenKrupp Xervon S.A. (Business Area Materials Services) führten zum 30. September 2010 zu einer Erhöhung der Verbindlichkeiten in Verbindung mit zur Veräußerung vorgesehenen Vermögenswerten um 544 Mio €. Insgesamt wurden in diesem Zusammenhang langfristige Verbindlichkeiten von 173 Mio € (davon Finanzschulden: 7 Mio €) sowie kurzfristige Verbindlichkeiten von 371 Mio € (davon Finanzschulden: 19 Mio €) umgegliedert. Gegenläufig wirkten sich abgehende Verbindlichkeiten in Verbindung mit zur Veräußerung vorgesehenen Vermögenswerten in Höhe von 288 Mio € durch Abwicklung der im Vorjahr eingeleiteten Transaktionen aus.

**NETTO-FINANZSCHULDEN** in Mio €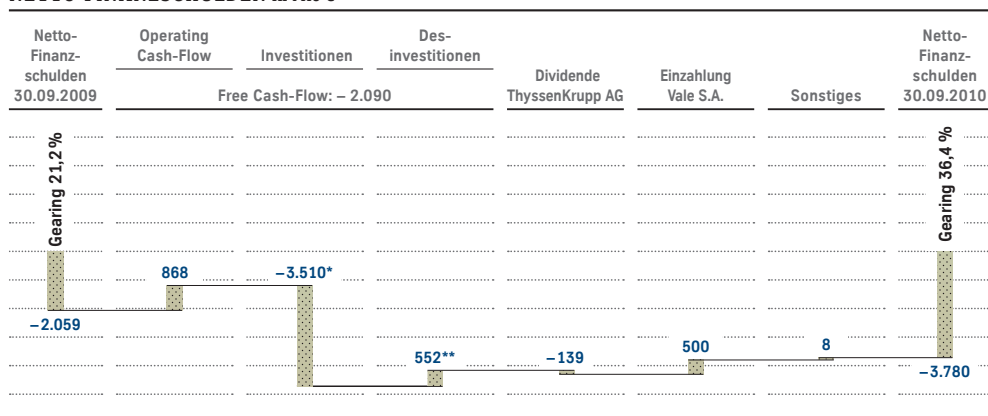

\* inklusive übernommene Zahlungsmittel und Zahlungsmitteläquivalente in Höhe von 3 Mio €

\*\* inklusive abgegebene Zahlungsmittel und Zahlungsmitteläquivalente in Höhe von 5 Mio €

technisch bedingt teilweise nicht maßstabsgerecht

## Nicht bilanziertes Vermögen und außerbilanzielle Finanzierungsinstrumente

Im Rahmen außerbilanzieller Finanzierungsinstrumente nutzen wir vor allem Forderungsprogramme. Einzelheiten dazu stehen unter der Anhang-Nr. 10 auf Seite 217.

In der Bilanz sind verschiedene Vermögenswerte des Konzerns nicht enthalten. Es handelt sich im Wesentlichen um bestimmte geleaste, gepachtete oder gemietete Güter (Operating Lease), über die Sie nähere Angaben unter der Anhang-Nr. 21 auf Seite 232 nachlesen können. Hinzu kommen selbst geschaffene Güter.

Zu diesen immateriellen Vermögensgegenständen, die nicht in der Bilanz aktiviert sind, gehört die Marke ThyssenKrupp. Wir haben sie auch im Berichtsjahr kontinuierlich weiterentwickelt und so das Auftreten unserer Konzerngesellschaften im Wettbewerb gestärkt.

Unsere langjährigen und eingespielten Lieferanten- und Kundenbeziehungen besitzen ebenfalls einen erheblichen Wert. Sie stabilisieren zum einen den Geschäftsverlauf und machen den Konzern unabhängiger von kurzfristigen Marktschwankungen. Dies bedeutet für uns einen konkreten Wettbewerbsvorsprung auf unseren Märkten. Zum anderen ermöglicht die vertrauensvolle Zusammenarbeit viele gemeinsame Forschungs- und Entwicklungsprojekte, in denen sich das Know-how und die Stärken unseres Konzerns mit denen unserer Marktpartner bündeln. Dies zahlt sich in innovativen, zukunftsorientierten Produkten und Dienstleistungen aus, die unseren Kunden und uns neue Möglichkeiten für Wirtschaftlichkeit und technischen Fortschritt eröffnen.



Unsere Zusammenarbeit mit der internationalen Fahrzeugindustrie ist ein Beispiel für dieses übergreifende Kompetenznetzwerk. Neue oder verbesserte Werkstoffe, leistungsfähige Platinen und optimierte Bauteile unserer Business Areas erleichtern den Automobilkonstrukteuren ihre Arbeit. Im Anlagenbau haben wir uns mit vielen erfolgreichen Referenzanlagen weltweit einen Namen gemacht, wenn es um herausfordernde Projekte geht, die ebenso wirtschaftlich wie umweltfreundlich sind. Im Vordergrund steht auch hier der enge Kontakt mit unseren Kunden.

Langjährige Kundenbeziehungen sind ein wichtiges Plus auch in unserem Elevator-Geschäft. Wirtschaftlichkeit, Termintreue und technische Kompetenz sind zusammen mit einem attraktiven Produktdesign die Schlüsselbegriffe, auf die unsere internationalen Kunden achten. Überall in der Welt haben wir inzwischen in architektonisch renommierten Hochhäusern und Flughäfen viele moderne Aufzüge und Fahrtreppen eingebaut. Die damit verbundenen Kontakte und Referenzen bieten eine gute Basis für Folgeaufträge.

Zu den Stärken von ThyssenKrupp gehören in allen Business Areas hochmotivierte und engagierte Führungskräfte und Mitarbeiter, die hervorragendes berufliches Wissen mit hoher Leistungsbereitschaft verbinden. Sie sind wichtige Know-how-Träger auf ihren Spezialgebieten und tragen zum Wert von ThyssenKrupp bei.



# Nachhaltigkeit

Nachhaltiges Wirtschaften ist grundlegender Bestandteil der Unternehmensphilosophie von ThyssenKrupp. Wir stellen uns frühzeitig auf neue gesellschaftliche und wirtschaftliche Herausforderungen ein und sichern dadurch auch langfristig unsere Innovationsfähigkeit und ein nachhaltiges Wachstum. Ein kontinuierlicher und offener Dialog mit unseren Stakeholdern sorgt für Transparenz und Akzeptanz.

Als integrierter Werkstoff- und Technologiekonzern bietet ThyssenKrupp weltweit innovative Produktlösungen, die den nachhaltigen Erfolg unserer Kunden sichern und einen positiven Beitrag zu einer nachhaltigen globalen Entwicklung leisten. Grundlage dafür ist eine verantwortungsvolle und auf langfristige Wertschöpfung ausgerichtete Unternehmensführung. In einem sich stetig wandelnden Umfeld entwickeln wir unser Unternehmen kontinuierlich weiter, um den globalen Herausforderungen auch zukünftig mit innovativen Lösungen begegnen zu können.

## Nachhaltigkeitsmanagement

Durch ein zentrales Nachhaltigkeitsmanagement wird nachhaltiges Handeln systematisch in die Grundsätze und Geschäftsprozesse des Konzerns integriert.

| THEMENFELDER NACHHALTIGKEIT |                               |                      |
|-----------------------------|-------------------------------|----------------------|
| Corporate Governance        | Compliance                    | Finanzen             |
| Umwelt & Klima              | Gesellschaftliches Engagement | Innovationen         |
| Kunden & Lieferanten        | Soziale Standards             | Energie & Ressourcen |
| Arbeitsschutz               | Attraktivität als Arbeitgeber |                      |



Dafür analysieren wir in zentralen Themenfeldern kontinuierlich die internen und externen Anforderungen, um entsprechende Ziele und Maßnahmen zu entwickeln. Durch eine umfangreiche Berichterstattung entwickeln wir die Transparenz über unsere Leistungen und Positionen zur Nachhaltigkeit permanent weiter. Bei ThyssenKrupp verstehen wir Nachhaltigkeit als eine wesentliche Führungsaufgabe. Im Geschäftsjahr 2010/2011 wird der Bedeutung von Nachhaltigkeit auch organisatorisch durch die Schaffung eines eigenständigen Vorstandsressorts Corporate Sustainability Rechnung getragen.

### Austausch und Dialog

Ein fortwährender, intensiver Austausch mit unseren Stakeholdern ist für uns von wesentlicher Bedeutung – sowohl mit Investoren, mit Mitarbeitern, mit unseren Kunden, mit der Politik als auch mit den Menschen in unserem direkten Umfeld. Der Dialog über die Leistungen unseres Unternehmens in Bezug auf Nachhaltigkeit ist ein Grundpfeiler für langfristige vertrauensvolle Zusammenarbeit und zeigt uns, welche Erwartungen an unser Unternehmen gestellt werden.

ThyssenKrupp beteiligt sich zudem aktiv an der Diskussion über eine nachhaltige Entwicklung und Unternehmensverantwortung. In Deutschland tun wir dies unter anderem durch unsere Mitwirkung bei „econsense – Forum Nachhaltige Entwicklung der Deutschen Wirtschaft e.V.“, einem Zusammenschluss von 28 global agierenden Unternehmen und Organisationen. Das vor zehn Jahren gegründete Netzwerk versteht sich als Dialogplattform und Think Tank zu relevanten Fragen der Nachhaltigkeit und Unternehmensverantwortung.

## Nachhaltigkeitsaktivitäten

Ausführliche Informationen über unsere wesentlichen Nachhaltigkeitsaktivitäten in den ausgewählten Bereichen Innovationen, Umwelt- und Klimaschutz, Mitarbeiter und gesellschaftliches Engagement werden in den folgenden Kapiteln dargestellt, z.B.:

- Im Berichtsjahr beliefen sich die gesamten Innovationsaufwendungen auf 677 Mio €. Weltweit sorgen ca. 3.500 Ingenieure, Techniker und Wissenschaftler für eine hohe Innovationskraft des Unternehmens (mehr auf den Seiten 146-151).
- Unser konzernweites Umwelt- und Klimaschutz-Management bildet den Rahmen für den Schutz der Umwelt, vernetzt vorhandenes Wissen und koordiniert länderübergreifende Schwerpunkte (mehr auf den Seiten 152-156).
- Mit bereinigt rund 1,8 t CO<sub>2</sub> je Tonne Rohstahl liegt unsere Business Area Steel Europe deutlich unter dem globalen Durchschnitt (mehr auf Seite 156).
- Für uns sind Sicherheit und Gesundheit der Mitarbeiter ein gleichrangiges Unternehmensziel zu wirtschaftlichem Erfolg und hoher Qualität der Erzeugnisse. Allein im Berichtsjahr ist die Zahl der Unfälle um 11 % gesunken. In den letzten fünf Geschäftsjahren betrug der Rückgang über 30 % (mehr auf Seite 160).
- Im Mai 2010 wurde bei ThyssenKrupp in Essen der Bundeswettbewerb der Stiftung Jugend forscht e.V. ausgerichtet (mehr auf Seite 144).

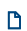

Einzelheiten: Seiten 146–151

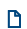

Einzelheiten: Seiten 152–156

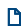

Einzelheiten: Seite 156

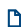

Einzelheiten: Seite 160

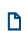

Einzelheiten: Seite 144



# Gesellschaftliches Engagement

Der nachhaltige Erfolg von ThyssenKrupp wird beeinflusst von einer intakten und zukunftsfähigen Gesellschaft – sowohl unmittelbar an unseren Standorten als auch auf nationaler und internationaler Ebene. Daher engagiert sich ThyssenKrupp bei einer Vielzahl von Projekten und Initiativen, um Zukunftsperspektiven zu verbessern und Hilfebedürftige zu unterstützen.

Langfristige und vertrauensvolle Partnerschaft ist ein wesentliches Element der erfolgreichen Zusammenarbeit von ThyssenKrupp mit unterschiedlichen gesellschaftlichen Gruppen. Die Konzernunternehmen verstehen sich überall dort, wo wir Standorte haben, als ein aktives Mitglied der Gesellschaft und unterstützen eine Vielzahl von gemeinnützigen Projekten, Organisationen und Initiativen.

## Unterstützung von gemeinnützigen Projekten

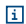

Für den 2010 von ThyssenKrupp ausgerichteten Wettbewerb Jugend forscht qualifizierten sich 179 Jugendliche.

### Ausrichter des Bundeswettbewerbs Jugend forscht 2010

Bereits seit mehreren Jahrzehnten unterstützen wir Jugend forscht, den bundesweit größten und erfolgreichsten Nachwuchswettbewerb im Bereich der Technik- und Naturwissenschaften. Im Mai 2010 hat ThyssenKrupp zusammen mit der Stiftung Jugend forscht e.V. den Bundeswettbewerb in Essen ausgerichtet, für den sich 179 Jugendliche mit insgesamt 107 Projekten qualifiziert hatten. ThyssenKrupp hat ein besonderes Interesse daran, junge Menschen an sogenannte MINT-Fächer (Mathematik, Informatik, Natur- und Technikwissenschaften) heranzuführen und ihre Begeisterung für diese Bereiche frühzeitig zu fördern. Punktuelle Ereignisse – wie die Teilnahme am Wettbewerb Jugend forscht – können wichtige Schlüsselerlebnisse sein und junge Menschen für Technik und Naturwissenschaften einnehmen.

### Hilfe für Bedürftige und Opfer von Naturkatastrophen

Zur Verbesserung der Lebensqualität von bedürftigen Menschen unterstützt ThyssenKrupp traditionell zahlreiche gemeinnützige Projekte im sozialen und humanitären Bereich. Dazu gehört auch, dass wir Hilfe leisten, wenn Naturereignisse ganzen Städten und Landstrichen die Lebensgrundlagen entziehen.

Im Berichtsjahr hat der Konzernbetriebsrat unter der Überschrift „Hilfe für Haiti“ weltweit die Belegschaften aufgerufen, für die Opfer der Erdbebenkatastrophe von Haiti zu spenden. Der Vorstand der ThyssenKrupp AG begrüßte diese Aktion und beschloss, sie auch finanziell zu unterstützen: Alle von den Mitarbeitern weltweit geleisteten Spenden wurden von der ThyssenKrupp AG verdoppelt. Unter dem



**1**

Im Rahmen von „1+1=2“ spendeten Mitarbeiter und Unternehmen 2010 für Opfer der Naturkatastrophen in Haiti und Pakistan.

Motto 1+1=2 war jeder gespendete Euro der Mitarbeiter gleich doppelt so viel wert. Insgesamt spendeten allein die Mitarbeiter in Deutschland rund 270.000 €. Hinzu kamen Spenden von Mitarbeitern in über 27 Ländern weltweit sowie die Aufstockung und Verdopplung der ThyssenKrupp AG. Die Mittel gingen im Wesentlichen an drei Wiederaufbauprojekte der Kindernothilfe e.V. in Duisburg – eine Schule in Port au Prince, ein Dorfentwicklungsprogramm in der Region Carrefour und ein Notschulprogramm.

Nachdem im Sommer 2010 sintflutartige Niederschläge in Pakistan zu den schlimmsten Überschwemmungen seit 80 Jahren geführt hatten, hat der Konzernbetriebsrat unter der Überschrift „Flutkatastrophe Pakistan: 1+1=2!“ die Belegschaften weltweit zu Spenden für die Flutopfer aufgerufen. Neben einer eigenen Spende verdoppelte die ThyssenKrupp AG auch hier jeden von den Mitarbeitern weltweit gespendeten Euro. Allein durch die Spenden der Mitarbeiter in Deutschland sind über 210.000 € für die Opfer der Katastrophe zusammengekommen. Die Gelder werden von der Kindernothilfe e.V. Duisburg sowohl für Soforthilfemaßnahmen als auch für den langfristigen Wiederaufbau verwendet.

### Engagement für Kunst, Kultur und Sport

Vielfältige Partnerschaften im Bereich Kunst und Kultur zählen für uns zu einer nachhaltigen Entwicklung. Der Konzern engagiert sich deshalb in zahlreichen Projekten und bietet sowohl finanzielle als auch ideelle Unterstützung an. Dies hilft, attraktive Angebote im Umfeld der großen ThyssenKrupp Standorte zu realisieren. So fördern wir beispielsweise neben dem Museum Folkwang in Essen auch das Lehmbruck Museum in Duisburg. Wir engagieren uns zudem beim Klavier-Festival Ruhr und für die Duisburger Philharmoniker.

Im Sport unterstützt der Konzern ausgewählte Wettbewerbe ebenso wie standortnahe Sportvereine. Seit vielen Jahren fördern wir die Internationale Ruder-Regatta und den jährlichen Rhein-Ruhr-Marathon in Duisburg.

## Netzwerke und Wissensaustausch

Bei ThyssenKrupp sehen wir uns auch in der Verpflichtung, uns aktiv in den öffentlichen Meinungsbildungsprozess einzubringen und zu gesellschaftlichen Themen Stellung zu beziehen, insbesondere wenn sie einen besonderen Bezug zur wirtschaftlichen Entwicklung haben. Daher sind wir beispielsweise Gründungsmitglied der Wissensfabrik, die sich bundesweit durch ihre Mitgliedsfirmen in Bildungsprojekten sowie für Existenzgründer und Jungunternehmer engagiert. Als unabhängige Stimme der Technikwissenschaften wird auch „acatech“, die Deutsche Akademie der Technikwissenschaften, von uns unterstützt. Die Akademie pflegt einen intensiven Dialog über zukunftsweisende Technologien sowie deren Bedeutung für nachhaltiges Wachstum und koordiniert den Innovationsdialog zwischen Bundesregierung, Wirtschaft und Wissenschaft.

In den Regionen, mit denen der Konzern traditionell verbunden ist oder wo er Standorte unterhält, fördern wir Initiativen und Projekte, die das Umfeld stärken. So engagieren wir uns seit dessen Gründung im Initiativkreis Ruhr, der als Zusammenschluss von führenden Wirtschaftsunternehmen der Region wichtige Zukunftsprojekte vorantreibt und so den Industriestandort Ruhr weiterentwickelt.



# Innovationen

Innovationen sind Motor für Wachstum und Wettbewerbsfähigkeit und damit strategisches Instrument für den nachhaltigen Unternehmenserfolg. Ständig weiterentwickelte Produkte, Prozesse und Dienstleistungen sind wesentliche Voraussetzungen für ein erfolgreiches Bestehen im Markt. Forschung und Entwicklung besitzen daher hohe Priorität für ThyssenKrupp.

## Innovationsaufwendungen

Im Berichtsjahr beliefen sich die Innovationsaufwendungen auf insgesamt 677 Mio €. Dabei wurden 249 Mio € für freie Forschung und Entwicklung – einschließlich aktivierter Entwicklungsaufwendungen – und 215 Mio € für kundenbezogene Entwicklungen aufgewendet. Während Projekte der freien Forschung und Entwicklung im Rahmen der angestoßenen Einsparmaßnahmen teilweise zeitlich gestreckt wurden, sind die Entwicklungstätigkeiten für Kundenprojekte bereits wieder über das Vorjahresniveau gestiegen. Zusammen entsprechen die Ausgaben für freie Forschung und Entwicklung und für kundenbezogene Entwicklungsarbeiten mit einem Minus von 3 % nahezu den Aufwendungen des Vorjahres. Signifikant niedriger liegen die Aufwendungen für technische Qualitätssicherung, die um 17 % zurückgegangen sind. Dies beruht zum einen auf umgesetzten Restrukturierungsmaßnahmen, zum anderen auf der 2009/2010 teilweise noch reduzierten Auslastung.

### INNOVATIONSaufWENDUNGEN in Mio €

|                                 | 2005/2006  | 2006/2007  | 2007/2008  | 2008/2009  | 2009/2010  |
|---------------------------------|------------|------------|------------|------------|------------|
| Freie Forschung und Entwicklung | 241        | 257        | 316        | 284        | 249        |
| Kundenbezogene Entwicklungen *  | 230        | 294        | 224        | 193        | 215        |
| Technische Qualitätssicherung   | 272        | 264        | 301        | 258        | 213        |
| <b>Insgesamt</b>                | <b>743</b> | <b>815</b> | <b>841</b> | <b>735</b> | <b>677</b> |

\* einschließlich FuE-Fremdmittel und öffentlicher Förderung

### INNOVATIONSaufWENDUNGEN 2009/2010 in %

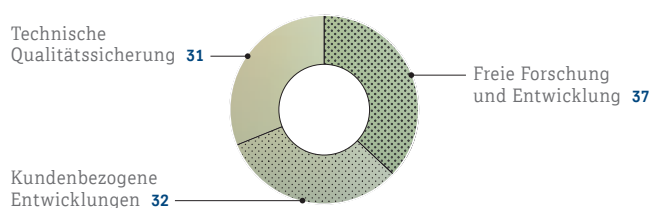



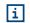

Rund 3.500 Ingenieure, Techniker und Wissenschaftler arbeiten bei ThyssenKrupp in Forschung und Entwicklung.

Zahlreiche unserer Entwicklungstätigkeiten und die daraus entstehenden Innovationen orientieren sich am nachhaltigen Umgang mit der Umwelt. Für unsere Kunden wollen wir Produkte und Dienstleistungen mit hoher Energie- und Ressourceneffizienz entwickeln und optimieren dafür auch unsere eigenen Prozesse. Die Entwicklungen erstrecken sich über das gesamte Technologieportfolio des Konzerns – von innovativen Werkstoffen und deren Anwendung über Aufzugsanlagen und Fahrtreppen, den Anlagenbau für die Chemie-, Zement- und Bergbauindustrie sowie Komponenten für die Automobil-, Maschinenbau- und Bauindustrie bis hin zum Marineschiffbau. So gehen beispielsweise unsere Kompetenzen in neuen Stahl- und Verbundwerkstoffen sowie deren Verarbeitung und Anwendung in alle Bereiche der Mobilität ein – von konventionellen Automobilen und Elektrofahrzeugen über Flugzeuge bis hin zu Schiffen.

Weltweit sorgen ca. 3.500 hervorragend qualifizierte und motivierte Ingenieure, Techniker und Wissenschaftler für eine hohe Innovationskraft des Unternehmens. Die technologische Differenzierung unserer Produkte, ausgerichtet an den Bedürfnissen unserer Kunden, stellt dabei die Basis für einen nachhaltigen Unternehmenserfolg dar. Unterstützung finden unsere Forscher und Entwickler durch eine starke interne Vernetzung unterschiedlichster Unternehmensbereiche sowie durch enge Partnerschaften und Kooperationen mit Universitäten, Hochschulen, Forschungsinstitutionen und anderen Unternehmen.

## ThyssenKrupp House of Innovation

Die Struktur und die Rahmenbedingungen für Innovationen und Technologie im Konzern sind im ThyssenKrupp House of Innovation zusammengefasst, dessen fünf virtuelle Bausteine für Ansätze und Aktivitätenschwerpunkte unserer Entwicklungsarbeit stehen:

- Der erste Baustein zielt darauf ab, unsere Technologiestrategie zu definieren und ständig weiterzuentwickeln. Wir haben dazu Technologie-Leittrends identifiziert, an denen wir unsere Entwicklungsschwerpunkte ausrichten und die sich wiederum an globalen Trends orientieren – von Werkstoffen, über Energie, Umwelt und Ressourcen bis zur Mobilität.
- Der zweite Baustein sieht vor, unsere Kompetenzen zu bündeln und Experten miteinander ins Gespräch zu bringen und zu vernetzen. Hierfür ist der Austausch zwischen den Konzernunternehmen noch weiter zu intensivieren. Wir haben deshalb das „Kompetenznetzwerk Innovationen und Technologie“ ins Leben gerufen, in dem Verantwortliche und Experten aus den Bereichen Forschung und Entwicklung, Innovation und Technologie übergreifende Themen diskutieren.
- Die Suche nach besseren Strukturen, Prozessen und Methoden des Innovationsmanagements kennzeichnet den dritten Baustein; wir unterstützen hier die konzernweite Nutzung von Best Practices.
- Der vierte Baustein steht für den Ausbau von Kooperationen und Partnerschaften mit Universitäten, Forschungsinstitutionen und anderen Unternehmen.
- Als fünfter Baustein des House of Innovation ist das Thema Innovationskultur definiert: Das Top-Management fördert Innovationen und schafft kreative Freiräume für unsere Ingenieure und Entwickler.



## Innovationen in allen Business Areas

### Automobiles Know-how in InCar-Initiative konzentriert

ThyssenKrupp hat die Ergebnisse der konzernweiten Forschungs- und Entwicklungsinitiative InCar bis Ende 2009/2010 bei 14 großen Automobilherstellern in Europa und Asien präsentiert. InCar führt das gesamte automobile Know-how des Konzerns zusammen. An dem Projekt waren Experten für Werkstoffentwicklung, Konstruktion und Produktionstechnik, Bauteilfertigung sowie Anlagen-, Werkzeug- und Prototypenbau aus mehreren Business Areas beteiligt. Bei InCar kann der Kunde verschiedene neue Lösungen für Bauteile oder -gruppen auswählen und den Schwerpunkt jeweils auf Kostensenkung, Funktionsverbesserungen oder Emissionsverminderung legen. Insbesondere der Umweltaspekt stand bei diesem Projekt im Fokus; Näheres dazu können Sie im Kapitel „Umwelt- und Klimaschutz“ auf Seite 156 lesen.

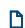

Einzelheiten: Seite 156

### Forschungskooperation mit der Technischen Universität Dresden

Um die Entwicklung von Zukunftstechnologien zu beschleunigen, haben ThyssenKrupp Steel Europe und die Technische Universität Dresden eine Kooperation auf dem Gebiet der Faserverbundwerkstoffe vereinbart. In einem Verbundprojekt werden zunächst die Grundlagen für ein Elektrofahrzeug in Ultra-Leichtbauweise erarbeitet. Ziel der Projektpartner ist es, durch konsequente Gewichtsreduzierung akzeptable Reichweiten bei attraktiven Kosten zu erreichen. Den ersten Schwerpunkt der Projektarbeit bildet die Entwicklung einer Karosseriestruktur, in der die neuen Antriebs- und Energiespeicherkomponenten berücksichtigt sind. Bei der Werkstoffauswahl stehen kohlenstofffaserverstärkte Kunststoffe (CFK) im Mix mit Metallen im Vordergrund. Den zweiten Schwerpunkt bildet die Entwicklung von Fertigungstechnologien. Insbesondere für CFK-Bauteile sollen wirtschaftliche Produktionsmöglichkeiten entwickelt werden, die es ermöglichen, den teuren Werkstoff auch in Serienfertigungen mit größeren Stückzahlen zu verwenden.

Die auf zwei Jahre angelegte Forschungs- und Entwicklungsinitiative ist herstellerneutral und will den Automobilproduzenten nach Projektabschluss realisierbare, durch Prototypen abgesicherte Lösungsvorschläge für die Serienfertigung anbieten.

### Neue warmgewalzte Stähle mit Nano-Ausscheidungen

Für die Automobilindustrie sind auch unsere neuentwickelten, besonders leistungsfähigen Stahlwerkstoffe von großem Interesse. Steigende Sicherheitsanforderungen auf der einen und wachsende Forderungen nach CO<sub>2</sub>-Minimierung auf der anderen Seite sorgen für zunehmende Nachfrage nach höherfesten Leichtbau-Stählen. Gleichzeitig erwarten die Automobilhersteller von diesen Werkstoffen gute Umformeigenschaften, um die Bauteile möglichst frei gestalten zu können.

Gemeinsam mit dem japanischen Stahlhersteller JFE Corporation entwickelten wir deshalb warmgewalzte Stähle im Festigkeitsbereich von 780 Megapascal bis 900 Megapascal, die sich im Vergleich zu den bisherigen höherfesten Stählen deutlich besser umformen und gleichzeitig gut verarbeiten lassen. Wir erreichen dies durch eine spezielle Gefügestruktur mit Nano-Ausscheidungen. Solche Werkstoffe eignen sich vor allem für sicherheitsrelevante Strukturbauteile in der Karosserie; erste Kundenerprobungen verliefen erfolgreich. Bereits seit 2002 arbeiten wir mit JFE in einer Kooperation eng zusammen.

### Forschungskooperation in Elektrochemie

Eine Grundlagendisziplin mit großer Bedeutung für zahlreiche Hochtechnologie-Anwendungen ist die Elektrochemie. Gemeinsam mit dem Land Nordrhein-Westfalen fördern wir deshalb das Center for Electrochemical Sciences (CES) an der Ruhr-Universität Bochum. Das Zentrum soll der zentrale,



international relevante Forschungsstandort für Elektrochemie in Nordrhein-Westfalen werden. Zum Forschungsgebiet gehören beispielsweise Oberflächenveredelung, Mikrosystemtechnik, Diagnostik oder Umweltüberwachung. Als Querschnittswissenschaft kann Elektrochemie auch dazu beitragen, Brennstoffzellen oder verbesserte Batterien für Autos der Zukunft zu entwickeln.

### Weiterentwicklung der Warmumformtechnologie

Innovative Fertigungsprozesse und neue Konzepte bei der Bauteilgestaltung können das Potenzial leistungsfähiger Werkstoffe weiter ausschöpfen. Zu diesen Verfahren zählt unser patentiertes Tailored-Tempering-Verfahren; diese Weiterentwicklung der Warmumformtechnologie hat jetzt den industriellen Durchbruch geschafft. Ein deutscher Automobilhersteller erteilte den Auftrag, nach diesem Verfahren B-Säulen für mehr als 100.000 Fahrzeuge im Jahr herzustellen.

Die Warmumformtechnologie spart bei Automobilbauteilen bis zu 30 % Gewicht ein. Derzeit erleben so hergestellte Bauteile geradezu einen Boom im Automobilbau. Basis für den Erfolg ist die hohe Festigkeit der warm umgeformten Bauteile, die mit 1.500 Megapascal wesentlich höher liegt als bei den derzeit leistungsfähigsten Stählen für die Kaltumformung. Dies ermöglicht signifikante Gewichteinsparungen ohne Abstriche bei der Sicherheit.

Bei Tailored Tempering können Komponenten belastungsorientiert mit lokal unterschiedlichen Festigkeits- und Dehnungseigenschaften hergestellt werden. Möglich macht dies ein neu entwickeltes, flexibel beheizbares Umformwerkzeug, in dem zuvor aufgeheizte Bleche beim Umformen unterschiedlich schnell abkühlen. Die Technologie lohnt sich, weil die Automobilhersteller mit solchen Bauteilen mehrere Prozess-Schritte und Einzelteile einsparen können.

### Hybridfahrwerksteile aus Stahl und Kunststoff

Um dem Kundenwunsch nach weiteren Kosten- und Gewichtseinsparungen bei Automobil-Fahrwerksteilen gerecht zu werden, haben wir Komponenten in Hybridbauweise entwickelt. Die Bauteile bestehen aus Stahlblechen und glasfaserverstärkten Kunststoffen und kombinieren die hohe Festigkeit der Glasfaser mit der Zähigkeit von Stahlblechen. Im Rahmen des Entwicklungsprojekts werden verschiedene Fahrwerksbauteile konstruiert, als Prototypen gebaut und dynamisch auf Funktionalität und Belastbarkeit geprüft. Die ersten erprobten Bauteile sind bei gleicher Schwingfestigkeit rund 20 % bis 30 % leichter als heute übliche Fahrwerksteile.

### Edelstahl-Design in der Architektur

Mit Fassadenblechen aus Edelstahl verkleiden immer mehr Architekten hochwertige Gebäude. Dabei spielen neben der Langlebigkeit des Materials vor allem Design und Ästhetik eine entscheidende Rolle. ThyssenKrupp begegnet den gestiegenen Anforderungen von Top-Architekten mit der neuen Design-Oberfläche „Laser“. Es ist die erste Edelstahl-Oberfläche mit unregelmäßiger Struktur, die keine Wiederholung von Figuren aufweist. Dadurch sind die Grenzen zwischen den Einzelflächen – sogenannte Rapport-Muster – nicht mehr sichtbar. Unter allen Betrachtungswinkeln und Lichtbedingungen zeigt sich eine absolut gleichmäßige Oberfläche. Erstmals wird diese neue Design-Oberfläche beim Bau eines Vorzeigeprojekts in New York eingesetzt.

### Entwicklungsaktivitäten im strategisch wichtigen Marktsegment Energietechnik

Wir haben die Laborentwicklung des neuen Werkstoffs Pernifer 36 Mo abgeschlossen, der als Kernmaterial in Freileitungsseilen für Hochspannungsleitungen eingesetzt werden soll. Bei konventionellen Überlandleitungen aus Stahl/Aluminium-Verbund ist die Stromübertragung begrenzt, da sich die Leitungsseile bei hohen übertragenen Leistungen wegen der Wärme zu stark dehnen und damit unzulässig durchhängen. Der neue Werkstoff dehnt sich trotz hoher mechanischer Festigkeit bei Wärme nur ein Viertel so stark aus wie bisher verfügbare Stähle; deshalb können die Mastenabstände vergrößert bzw. die übertragene Leistung erhöht werden.

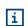

Architektonisch anspruchsvolle Gebäude werden zunehmend mit Edelstahl verkleidet.



### Spezialwerkzeuge für die Zukunftsmärkte der regenerativen Energien

Solarthermische Turmkraftwerke benötigen Tausende von Spiegeln zur Fokussierung der solaren Energie. Diese sogenannten Heliostaten werden im Allgemeinen auf Betonfundamenten verankert. Mit einem von uns entwickelten Spezialgerät zur Gründung von Heliostaten lassen sich die Baukosten jetzt beachtlich senken. Das Gerät rammt vibrierend in kurzer Zeit dünnwandige Rohre in den Boden, wobei der obere Teil des Rohrs als Träger für den Heliostaten inklusive aller Anbauten dient. Drei Prototypen wurden bereits von einem Kunden mit Erfolg in der Mojave-Wüste in Kalifornien getestet. Auch bei Geothermiebohrungen zur Erforschung und Nutzung von Erdwärme ist unsere Tiefbautechnik gefragt. Durch überlagernde Vibrationen auf dem Drehbohrkopf erhöht sich der Bohrfortschritt erheblich. Der Prototyp eines solchen Bohrwerkzeugs wird zurzeit durch einen Kunden getestet.

### Hochflexible Aufzugstechnologie

Zu den am Markt erfolgreichsten FuE-Projekten der vergangenen Jahre gehört TWIN: Zwei Aufzugskabinen fahren übereinander und unabhängig voneinander im gleichen Schacht. Das beansprucht deutlich weniger Platz und sorgt für einen großen Gewinn an Leistung und Komfort. Unser Elevator-Bereich bietet die TWIN-Technologie exklusiv an und konnte im Berichtsjahr die Verkaufszahlen erneut steigern. Der Erfolg von TWIN zeugt von der wachsenden Bedeutung des High-Rise-Segments: Hochhäuser, die nach anspruchsvollen Transportlösungen verlangen. Insbesondere in sehr hohen Gebäuden ergänzen sich schnelle Doppeldecker-Aufzüge und hochflexible TWIN-Systeme optimal, um Passagiere innerhalb bestimmter Gebäudezonen zu befördern. Ein gutes Beispiel für ein solches Mobilitätskonzept ist der 385 m hohe CMA Tower in Riad, Saudi-Arabien. Hier werden 17 TWINS mit elf Doppeldeckeraufzügen und zwölf weiteren Anlagen – unter anderem in besonders energieeffizienter maschinenraumloser Ausführung – eingebaut. Bei diesem Projekt kommen fast alle High-Rise-Komponenten aus unserem Produktportfolio zum Einsatz. Ohne die neuesten Maschinen-, Steuer-, Regel- und Sicherheitstechnologien, die in den letzten Jahren für die Personenbeförderung entwickelt wurden, wären solche anspruchsvollen Bauvorhaben kaum zu realisieren.

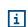

Abfallrecycling in der Zementherstellung – das Projekt punktete im ThyssenKrupp Innovationswettbewerb 2010.

### Ressourcenschonung in der Zementherstellung

Um natürliche Ressourcen zu schonen, haben unsere Anlagenspezialisten eine Strategie zum thermischen und stofflichen Recycling von Abfällen bei der Zementherstellung entwickelt. Die umfangreichen Konzepte sehen vor, möglichst auf fossile Brennstoffe im Zementwerk zu verzichten. In Kombination mit einer intensiven Kundenberatung lassen sich auf diesem Weg Kosten und Emissionen enorm senken. Ein Beispiel für die vielen Einzelmaßnahmen ist der weiterentwickelte Hauptbrenner, der im Drehrohr-Ofen den Rohstoff zum Klinker brennt. Durch eine konstruktive Anpassung können die Primärluftdüsen auch während des Brennbetriebs jederzeit von außen verstellt und dem eingesetzten Ersatzbrennstoff angepasst werden. Die erste Inbetriebnahme beim Kunden hat bereits sehr gute Ergebnisse gezeigt. Im ThyssenKrupp Innovationswettbewerb 2010 erhielt das Konzept den Sonderinnovationspreis „Energie und Umwelt“.

### Kompakte Brechanlage für den Einsatz untertage

Unsere Spezialisten für Bergbauanlagen entwickeln derzeit in Kooperation mit einem der weltweit führenden Minenunternehmen einen neuen Brecher für die Hartgesteinszerkleinerung untertage. Ermöglicht wird der Untertageeinsatz durch die innovative kompakte Bauweise. Die Anlage kann stündlich mehr als 1.000 t Kupfer, Eisenerz oder Naturstein für den Transport an die Oberfläche zerkleinern. Nachdem die Computersimulationen und der Test eines maßstäblichen Modells erfolgreich abgeschlossen sind, folgen jetzt Konstruktion und Fertigung eines Prototyps.



### Elektrolysezellen mit weniger Energieverbrauch

Auf elektrochemischem Weg Chlor – ein wichtiges Vorprodukt z.B. für Kunststoffe – zu gewinnen, ist einer der energieaufwändigsten Prozesse der chemischen Industrie. Unsere Anlagenbauer entwickeln jetzt eine neuartige Elektrolysetechnologie, die dank eines optimierten Designs weniger Energie verbraucht. Zudem haben sie eine Elektrolysezelle mit sogenannter Sauerstoffverzehrkatode entwickelt. Durch die Einspeisung von Sauerstoff bildet sich kein Wasserstoff als Koppelprodukt; dies senkt den Stromverbrauch der Membranelektrolyse um bis zu 30 % und reduziert auch die CO<sub>2</sub>-Emissionen. Eine auf dieser Technologie basierende großtechnische Demonstrationsanlage mit einer Kapazität von 20.000 Jahrestonnen geht Mitte 2011 in Betrieb.

### Fertigungs- und Prüftechnik für Faserverbundwerkstoffe in der Luftfahrt

Der Anteil von Faserverbundwerkstoffen in der Luftfahrtindustrie nimmt bei neuen Flugzeuggenerationen stetig zu. Es bietet sich deshalb an, Bauteile aus Faserverbundwerkstoffen gleich in einem herzustellen, anstatt sie aus mehreren Einzelteilen zusammenzufügen. Um das in der Luftfahrtindustrie geltende Niveau bei der Qualitätsüberwachung auch bei einer solchen Integralbauweise einzuhalten, haben unsere Ingenieure ein neues Prüfkonzzept für Integralstrukturen aus Kohlefaserverbundwerkstoffen erarbeitet. Dazu entwickelten sie in einem geförderten Forschungsprojekt eine Vorrichtung, eine Landeklappe mittels Ultraschall auf Fehlstellen zu prüfen. Die Vorrichtung wurde vom Kunden verifiziert und wird jetzt durch uns vermarktet. Neben der Bauteilprüfung haben wir auch das Herstellverfahren von Integralbauteilen weiterentwickelt. Hierzu wurde erstmals ein Werkzeug mit einem geringen thermischen Ausdehnungskoeffizienten konstruiert, gebaut und getestet. Darüber hinaus entwickeln wir die notwendigen Montagewerkzeuge, die Beschädigungen insbesondere an Großteilen vermeiden.

### Markteinführung von elektrisch unterstützten Lenksystemen

Einen wichtigen Beitrag für umweltfreundliches und zugleich komfortables Fahren liefern unsere neuen elektrisch unterstützten Lenkungen. Nach gut dreijähriger Entwicklung konnte im Berichtsjahr die Montage der ersten eigenen Generation von elektrisch unterstützten Lenkgetrieben am Standort Mülheim an der Ruhr aufgenommen werden. Auf Grund des Ersatzes der hydraulischen durch die elektrische Unterstützung sinken der Energieverbrauch und damit die CO<sub>2</sub>-Emissionen. Außerdem bietet das Lenksystem ein sogenanntes Road Feedback, das für den Fahrer den Straßenzustand am Lenkrad wie gewohnt spürbar macht. Unsere Kunden können je nach ihren Anforderungen an Leistung, Funktion und Einbauraum das Lenksystem aus einem Baukastensystem zusammenstellen.

### Lithium-Ionen-Batterietechnologie für den Unterwassereinsatz

Der Brennstoffzellenantrieb ist mittlerweile Standard bei fast allen unserer neuen U-Boote und erlaubt sehr lange Unterwasserzeiten. In Kombination mit Lithium-Ionen-Batterien ließen sich die kurzfristigen Leistungsabrufe weiter wesentlich steigern, so dass höhere Fahrgeschwindigkeiten möglich werden. Damit ergänzt die Lithium-Ionen-Batterietechnologie ideal die Brennstoffzelle. Unsere Schiffbauingenieure arbeiten deshalb zurzeit daran, diese Batterietechnologie in unsere U-Boote zu integrieren. Ein Batterieprototyp mit einer Kapazität von mehr als 1 Megawattstunde wurde bereits auf dem Solarzellenkatamaran „Planetsolar“ getestet. Das zweirümpfige Versuchsboot, das ausschließlich mit Sonnenenergie angetrieben wird, wird 2011 eine Weltumrundung beginnen.

#### 1

Lithium-Ionen-Batterien sollen in Verbindung mit Brennstoffzellen unsere U-Boote noch schneller machen.



# Umwelt- und Klimaschutz

Verantwortungsvoller Umwelt- und Klimaschutz ist ein wichtiges Unternehmensziel für uns. Wir gehen mit den verfügbaren Ressourcen verantwortungsbewusst um und setzen uns für die Vielfalt der natürlichen Lebensgrundlagen ein. Die in der Produktion verwendeten Verfahren und unsere breite Palette umwelt- und klimafreundlicher Produkte sind wichtige Beiträge zur Zukunftsfähigkeit des Konzerns und zur Lösung globaler Herausforderungen.

## Umweltschutzaufwendungen weiter erhöht

Der hohe Stellenwert des Umwelt- und Klimaschutzes hat sich auch im abgelaufenen Geschäftsjahr in unseren Aufwendungen und Investitionen in diesem Bereich gespiegelt. Für den laufenden Betrieb der eigenen Umweltschutzeinrichtungen haben wir 532 Mio € aufgewendet, ein Plus von 17 %. Gleichzeitig stiegen die Investitionen für neue Umweltschutzanlagen um 221 % auf 238 Mio €. Der hohe Zuwachs lag vor allem an den Umweltschutzinvestitionen in den neuen Werken von Steel Americas in Brasilien und den USA, die entsprechend den Anforderungen der besten verfügbaren Technik hohe Umweltschutzstandards einhalten. Aber auch die anderen Business Areas haben sich für Umwelt- und Klimaschutz engagiert und viele Maßnahmen ergriffen, um insbesondere Energie effizienter zu nutzen, Abfall zu vermeiden und Reststoffe besser zu verwerten.

### LAUFENDE UMWELTSCHUTZAUFWENDUNGEN in Mio €

|                                          | 2005/2006  | 2006/2007  | 2007/2008  | 2008/2009  | 2009/2010  |
|------------------------------------------|------------|------------|------------|------------|------------|
| Luftreinhaltung                          | 141        | 183        | 182        | 162        | 191        |
| Gewässerschutz                           | 168        | 204        | 201        | 195        | 226        |
| Lärm- und Landschaftsschutz              | 16         | 24         | 16         | 13         | 19         |
| Recycling und Verwertung von Reststoffen | 87         | 109        | 112        | 84         | 96         |
| <b>Insgesamt</b>                         | <b>412</b> | <b>520</b> | <b>511</b> | <b>454</b> | <b>532</b> |

### LAUFENDE UMWELTSCHUTZAUFWENDUNGEN 2009/2010 in %

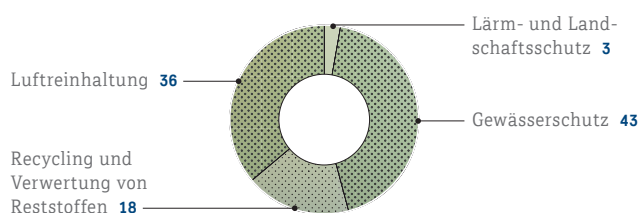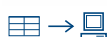

Download der Tabellen unter:  
[http://www.thyssenkrupp.com/financial-reports/09\\_10/de/](http://www.thyssenkrupp.com/financial-reports/09_10/de/)



## Umwelt- und Klimaschutz-Managementsystem

Der Bedeutung von Umwelt- und Klimaschutz für ThyssenKrupp wurde mit der Benennung eines Konzernbeauftragten für Umwelt und Klima als Teil der Neuorganisation 2009 Rechnung getragen. Vor dem Hintergrund unserer weltweiten Aktivitäten galt es, den Rahmen für eine konzernweite Umwelt- und Klimapolitik zu setzen, vorhandenes Wissen zu vernetzen und die länderübergreifenden Schwerpunkte im Umwelt- und Klimaschutz zu koordinieren. Als ersten Schritt haben die Umweltschutz-Ansprechpartner aller Business Areas in einem internationalen Treffen die Eckpunkte eines konzernweiten Umwelt- und Klimaschutz-Managementsystems festgelegt. Das System definiert Anforderungen an den Umwelt- und Klimaschutz der Konzernunternehmen, verbessert die interne Berichterstattung und fördert den Austausch der Umweltschützer des Konzerns. Im neuen Geschäftsjahr steht die Systemumsetzung an.

## Querschnitt erfolgreicher Umweltschutzprojekte

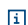

Senkung des Energieverbrauchs war 2009/2010 Ziel vieler Umweltschutzprojekte im Konzern.

### Ressourcenschonung und Energieeffizienz

Ein schonender Umgang mit Ressourcen und Klima ist bei ThyssenKrupp ein zentraler Bestandteil der Strategie, aber auch des täglichen Geschäfts. Zahlreiche Projekte für höhere Energieeffizienz in unseren Konzernunternehmen haben sowohl zusätzliche Kosten eingespart als auch die mit der Energienutzung verbundene Freisetzung von Treibhausgasen wie z.B. CO<sub>2</sub> weiter verringert. Zusätzlich wurde 2009/2010 die deutschlandweite Kampagne „Energie sparen“ ins Leben gerufen, bei der sich unsere Mitarbeiter für den sparsamen und umweltfreundlichen Einsatz von Energie engagieren können.

Dank einer weiter verbesserten Betriebsweise der Produktionsanlagen konnte die Business Area Steel Europe am Standort Duisburg den elektrischen Energieverbrauch senken. Dazu haben wir den Betrieb der Presswasserpumpen und die Regelungstechnik der Stoßöfen optimiert. In einer Feuerbeschichtungsanlage spart eine emissionsmindernde Ofenfahrweise Energie ein.

Eine geänderte Anlagenfahrweise an zwei Glüh- und Beizlinien senkte bei ThyssenKrupp Mexinox in der Business Area Stainless Global den Energieverbrauch. Durch Prozessverbesserungen erhöhte ThyssenKrupp Nirosta in Bochum die Effizienz des Erdgaseinsatzes um 14 Kilowattstunden je Tonne Edelstahl.

Elevator Technology hat das weltweite Programm "sustainable efficiency" gestartet. Mit einem ganzheitlichen Ansatz zur nachhaltigen Effizienzsteigerung werden systematisch die Umweltauswirkungen über den gesamten Lebenszyklus eines Produktes betrachtet – angefangen von Rohstoffen und Materialtransport über Produktion, Installation und Service bis hin zu Recycling und Reststoffentsorgung.

Mit ihrem aktuellen Energiesparprogramm wird der Kurbelwellenspezialist ThyssenKrupp Crankshaft Company in den USA jährlich rund 1,3 Mio Kilowattstunden Strom einsparen, was umgerechnet mehr als 1.000 t CO<sub>2</sub> entspricht. Aber auch viele intelligente kleinere Maßnahmen können in Summe spürbar Energie sparen. Dies zeigt das Beispiel von ThyssenKrupp Presta Camshafts an Standorten in Deutschland und China. Spezielle Fensterfolien verringern die Wärmeein- und -abstrahlung in Werkshallen, neue Energiesparleuchten optimieren die Beleuchtung, und die Abwärme aus Fertigungsanlagen trägt zur Hallenbeheizung bei.



Traditionell wird in Gießerei-Schmelzbetrieben die abzuführende Wärme über einen Luft/Luft-Wärmetauscher direkt an die Atmosphäre abgegeben; die Energie geht ungenutzt verloren. Unsere Gießerei ThyssenKrupp Waupaca in den USA hat deshalb einen weiterentwickelten Luft/Flüssigkeit-Wärmetauscher installiert, um die Abwärme zur Gebäudebeheizung und Warmwasseraufbereitung zu nutzen. In den Wintermonaten können die Gebäude so zu 70 % beheizt und der Gasverbrauch zur Warmwasseraufbereitung kann sogar um 95 % reduziert werden. Diese Maßnahme wurde von der Regierung des US-Bundesstaates Wisconsin mit einem Umweltpreis ausgezeichnet.

### Reststoffverwertung und Recycling

Im Zuge der kontinuierlichen Entwicklung von Verfahren zur Reststoffverwertung erhielt die Business Area Steel Europe die Produktanerkennung für Eisen(II)-Chloridlösung. Diese Lösung ist ein Nebenprodukt, das in der Blechbeschichtung anfällt und jetzt für die Herstellung von Eisenoxid und Reagenzien für Biogasanlagen eingesetzt werden kann. Ob sie darüber hinaus für weitere Einsatzzwecke geeignet ist, wird derzeit geprüft.

Das Regenwasser von den Werksdächern wird ThyssenKrupp Electrical Steel in Gelsenkirchen in ihrer Kreislaufwasseranlage nutzen und entsprechend weniger Wasser aus dem öffentlichen Versorgungsnetz entnehmen. Bezogen auf eine Dachfläche von rund 2.500 Quadratmetern lassen sich im Durchschnitt jährlich etwa 2.000 Kubikmeter Wasser gewinnen.

In ihrem Stahlwerk in Brasilien setzt Steel Americas modernste Umwelttechnologien ein. Nach Inbetriebnahme der ersten Produktionslinie nutzen die Anlagen zu 97 % Kreislaufwasser. Fast 27 % der anfallenden Reststoffe werden innerhalb der eigenen Produktionsprozesse recycelt und nur 6 % müssen einer regulären Entsorgung zugeführt werden. Die übrigen 67 % der Reststoffe gehen entweder als Nebenprodukte oder als wiederverwertbare Stoffe in den Markt. Beispielsweise entsteht aus der Hochofen-Schlacke hochwertiger Zement.

Auch die Business Area Elevator Technology setzt in ihrer Produktion auf recycelfähige Materialien. Langfristig sollen alle Reststoffe wiederverwertet oder rückstandslos entsorgt werden. Hinzu kommt: Leichte Werkstoffe und gewichtsparende Konstruktionen reduzieren den Materialeinsatz für Aufzüge, Fahrtreppen und -steige sowie Fluggastbrücken beachtlich und schonen die Ressourcen.

ThyssenKrupp Bilstein aus der Business Area Components Technology hat im abgelaufenen Geschäftsjahr an den Standorten in Brasilien und den USA Projekte zur Ressourceneinsparung durchgeführt. In Brasilien startete das "Conscious Consumption Project" mit den Schwerpunkten Wasser, Energie, Papier und organische Abfälle sowie einem Fokus auf Recycling oder Mehrwegverwendung. In den USA erhielt das Projekt „Going Green(er) at Bilstein“ 2010 die Auszeichnung „Reward from Cincinnati Regional Chamber“ für die umgesetzten Maßnahmen zur Energieeinsparung und Abfallvermeidung. Auch in Deutschland verminderte die kontinuierliche Optimierung von Kühlkreisläufen am Standort Hagen-Hohenlimburg den benötigten Kühlwassereinsatz von 1 Mio Kubikmetern 1999 auf knapp 0,2 Mio Kubikmeter Ende 2009.

### Luftreinhaltung, Gewässer- und Bodenschutz

Zur weiteren Verbesserung der Luftqualität rüstet Steel Europe am Standort Duisburg ein Sinterband im dortigen Hüttenwerk mit einem Gewebefilter nach. Die neue Anlage wird 2011 fertiggestellt und soll jährlich etwa 450 t Feinstaub aus der Luft herausfiltern. Im Berichtsjahr ging weiterhin die neugebaute Sickerwasser-Behandlungsanlage auf der Deponie Dinslaken-Wehofen in Betrieb. Auf der Deponie fällt Sickerwasser an, das als Folge der abgelagerten Reststoffe mit Schadstoffen belastet ist und durch die Basisabdichtung aufgefangen wird. In der neuen Anlage neutralisiert ein spezielles Oxidationsmittel die Schadstoffe.

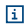

In unserem Stahlwerk in Brasilien werden modernste Umwelttechnologien eingesetzt.



Im neuen Walzwerk von Steel Americas in Alabama wurde modernste Umwelttechnik eingebaut. Die Warm- und Kaltwalzgerüste verfügen über moderne Nasselektrofilter zur Feinstaubabscheidung. Alle Kessel, Wiederaufheizsysteme und Glühöfen sind darüber hinaus mit Ultra-Low-NOx-Brennern ausgestattet, um die Entstehung von Stickstoffoxiden an der Quelle zu minimieren. Die in der Säureregeneration installierten Nasswaschanlagen bewirken eine deutlich über den Grenzwert hinausgehende Reduktion der Chlorwasserstoff-Emissionen. In die Abluftkamine der Dressier- und Tandem-Walzgerüste wurden Tropfenabscheider eingebaut. Das Abwasser wird in einem neuartigen Biofiltersystem aufbereitet.

Bei ThyssenKrupp Acciai Speciali Terni ging eine neue Entstaubungsanlage am Elektrolichtbogenofen in Betrieb. Der zusätzliche Gewebefilter hat den Volumenstrom der Entstaubung verdoppelt, wodurch die Staubemissionen erheblich niedriger liegen. Außerdem ermöglicht eine Anlage zur Nassaufbereitung, diesen Staub problemlos auf die werkseigene Deponie zu bringen. Eine neue Sprühbeizanlage bei ThyssenKrupp VDM im Werk Altena übertrifft die aktuellen Umweltstandards: Durch direkte Injektion von Wasserstoffperoxid in den Beitzunnel reduziert sie die Bildung von Stickoxiden auf das derzeit machbare Minimum. Dabei misst die Prozesstechnik kontinuierlich die relevanten Gase Fluorwasserstoff, Sauerstoff und Stickoxide, während 80 Sensoren die Säurebehandlung überwachen. Die Anlage benötigt so im Vergleich zu vorher weniger Beizmedium.

## Umwelt- und klimafreundliche Produkte

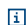

Intelligente Problemlösungen helfen den Kunden beim effektiven Umwelt- und Klimaschutz.

Mit vielen Werkstoffen, Komponenten und Systemlösungen ist ThyssenKrupp effektiver Problemlöser und Partner seiner Kunden beim Umwelt- und Klimaschutz. Energieeffiziente Aufzüge, EnviNOx-Anlagen zur Reduzierung von Stickoxidemissionen oder hocheffizientes Elektroband für Elektromaschinen sind nur einige der vielen Innovationen. Unsere Werkstoffe und Technologien tragen dazu bei, aus ambitionierten Visionen realistische Klimaziele zu machen.

Ein Beispiel ist das im September 2010 mit dem Öko Globe ausgezeichnete automobiler Baukasten-System InCar. Mit InCar lassen sich pro Automobil-Lebenszyklus 5.500 kg CO<sub>2</sub> je Fahrzeug sparen. In dem Wert sind die Emissionen während der Produktionsphase und aus dem Fahrbetrieb zusammengefasst. Wird nur der Fahrbetrieb betrachtet, entlastet InCar das Klima um mehr als 17 g pro gefahrenen Kilometer. Die ganzheitliche Öko-Bilanz für InCar ist durch den TÜV Nord zertifiziert.

ThyssenKrupp VDM aus der Business Area Stainless Global hat gemeinsam mit E.ON und Hitachi Power Europe einen neuen Werkstoff entwickelt, der nach erfolgreicher Testphase nun ein wesentlicher Baustein für die Konstruktion einer neuen Kraftwerksgeneration sein wird. Die neue Technologie kann Kohlekraftwerke effizienter machen und gleichzeitig ihren Kohlendioxid-Ausstoß reduzieren. Der höhere Wirkungsgrad beruht auf einer Steigerung der Dampftemperatur in Kessel und Turbine von 600 °C auf rund 700 °C bei gleichzeitiger Druckerhöhung von 250 bar auf 350 bar. Dies sind Betriebsbedingungen, denen die im heutigen Kraftwerksbau eingesetzten Materialien nicht dauerhaft standhalten würden. Insoweit kommt unseren neuentwickelten Sonderstählen auf Nickelbasis eine Schlüsselrolle bei der Konstruktion des Kraftwerks der Zukunft zu.

Im Rahmen unserer GreenTec-Initiative zeigt das PRENFLO™-Verfahren von Uhde neue Möglichkeiten auf, Biomasse zu nutzen. Es wurde deshalb als ein Technologiebaustein für das BioTfuel-Projekt ausgewählt, an dem neben Uhde fünf französische Partner beteiligt sind. Bei PRENFLO™ werden kohlenstoffhaltige Feststoffe vergast, um Kraftstoff aus Biomasse herzustellen. Die Forschungspartner entschieden sich für das Verfahren wegen seiner Flexibilität, denn es ist für eine Vielzahl von Biomassen und anderen Rohstoffen geeignet. Darüber hinaus ermöglicht es eine hohe Energieeffizienz und produziert sehr sauberes Synthesegas. Das Gesamtbudget des BioTfuel-Projekts beträgt rund 113 Mio €; es umfasst den Bau und Betrieb von zwei Pilotanlagen in Frankreich zur Herstellung von Biodiesel und Biokerosin, die bereits 2012 in Betrieb gehen werden.



Im Feld der umweltrelevanten Produkte gehört Rothe Erde aus der Business Area Components Technology nach wie vor zu den führenden Herstellern von Großwälzlager- und nahtlos gewalzten Ringen, wie sie z.B. in Anlagen zur Gewinnung von Wind- und Solarenergie oder in Wasserkraftwerken eingesetzt werden. Die Komponenten sind hochbelastbar und wartungsarm; sie eignen sich daher besonders für den Einsatz im Bereich erneuerbarer Energien.

## Klimaschutz mit hohem Stellenwert

Der rücksichtsvolle Umgang mit Energie und den natürlichen Ressourcen gehört ebenso zum Bild von ThyssenKrupp wie die Produktion umweltfreundlicher Werkstoffe und Technologiegüter. Nachhaltiger Klimaschutz muss dabei im Einklang mit der globalen Wettbewerbsfähigkeit des Unternehmens und der langfristigen Sicherung von Arbeitsplätzen stehen.

Unsere unternehmerischen Aktivitäten, die unter den europäischen Emissionshandel fallen, zeichnen bisher für rund 90 % der CO<sub>2</sub>-Emissionen des Konzerns verantwortlich. Dies machte 2009 15,3 Mio t aus, wovon der mit 15,0 Mio t größte Teil auf deutsche Standorte entfiel – zumeist auf unsere Stahlaktivitäten. Der merkliche Rückgang im Vergleich zu den Vorjahren ist wesentlich durch die Auswirkungen der Wirtschafts- und Finanzkrise bedingt. Eine detaillierte Handelsstrategie sichert das Unternehmen gegen Marktrisiken im Handel mit Emissionszertifikaten ab. Dies beinhaltet auch die Förderung von Clean-Development-Mechanism- und Joint-Implementation-Projekten, bei denen die CO<sub>2</sub>-Minderung in Ländern, die nach dem Kyoto-Protokoll nicht zur Emissionsreduktion verpflichtet sind, mit Emissionen anderenorts aufgerechnet werden kann.

In der Stahlherstellung verwendet ThyssenKrupp bereits die modernsten Technologien und kann bei der Reduktion seiner CO<sub>2</sub>-Emissionen erhebliche Erfolge vorzeigen. Die Effizienz des Reduktionsmitteleinsatzes in unseren Hochöfen ist seit Jahren schon nahe dem chemisch-technischen Optimum. Mit bereinigt rund 1,8 t CO<sub>2</sub> je Tonne Rohstahl liegt Steel Europe deutlich unter dem globalen Durchschnitt.

ThyssenKrupp engagiert sich bei Forschungsinitiativen über zukunftsweisende Produktionsverfahren für die nächsten Jahrzehnte. Hierzu zählt neben eigenen Initiativen insbesondere die federführende Teilnahme am Projekt „Ultra Low CO<sub>2</sub> Steelmaking“. An dieser Initiative sind 48 Partner aus 15 europäischen Ländern beteiligt. Das Konsortium vereint fast alle großen europäischen Stahlproduzenten, deren Zulieferer sowie zahlreiche Universitäten und Forschungsinstitute. Wissenschaftler und Ingenieure des Konzerns beteiligen sich außerdem aktiv in nationalen und internationalen Gremien zu technischen, wirtschaftlichen und gesellschaftlichen Fragen des Klimaschutzes. Hierzu zählt für ThyssenKrupp auch die Teilnahme am Carbon Disclosure Projekt (CDP), einer globalen Transparenzinitiative zum Klimaschutz. In diesem Jahr wurde ThyssenKrupp erstmalig vom CDP in den Carbon Disclosure Leadership Index Deutschland aufgenommen.

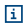

Der Einsatz von Reduktionsmitteln in unseren Hochöfen liegt nah am chemisch-technischen Optimum.



# Mitarbeiter

Ideen und Initiativen unserer Mitarbeiter und Führungskräfte prägen den Erfolg des Konzerns. Um dafür auch künftig die besten Köpfe zu haben, bilden wir intensiv Jugendliche aus, werben an Hochschulen um Nachwuchstalente und fördern die bei uns tätigen Menschen. Wer durch Leistung nach vorne kommen will, findet bei ThyssenKrupp anspruchsvolle Aufgaben und gute Berufschancen.

## Belegschaftsentwicklung

ThyssenKrupp beschäftigte am 30. September 2010 177.346 Mitarbeiter in aller Welt – 10.149 oder 5,4 % weniger als zum Ende des vergangenen Geschäftsjahres. Dies ist im Wesentlichen auf Unternehmensverkäufe zurückzuführen. In Deutschland verringerte sich die Mitarbeiterzahl um 12,5 % auf 71.072. Die Belegschaft in den übrigen Ländern blieb mit 106.274 nahezu unverändert.

### MITARBEITER NACH BUSINESS AREAS

|                       | 30.09.2006     | 30.09.2007     | 30.09.2008     | 30.09.2009     | 30.09.2010     |
|-----------------------|----------------|----------------|----------------|----------------|----------------|
| Steel Europe          | 37.506         | 37.749         | 38.692         | 36.416         | 34.711         |
| Steel Americas        | 70             | 397            | 1.158          | 1.659          | 3.319          |
| Stainless Global      | 12.197         | 12.182         | 12.212         | 11.755         | 11.235         |
| Materials Services    | 41.269         | 44.251         | 47.703         | 44.316         | 33.856         |
| Elevator Technology   | 36.247         | 39.501         | 42.992         | 42.698         | 44.024         |
| Plant Technology      | 12.186         | 13.102         | 13.433         | 13.043         | 12.972         |
| Components Technology | 33.417         | 32.805         | 32.312         | 27.973         | 29.144         |
| Marine Systems        | 8.895          | 8.778          | 8.288          | 7.770          | 5.488          |
| Corporate             | 5.799          | 2.585          | 2.584          | 1.865          | 2.597          |
| <b>Konzern</b>        | <b>187.586</b> | <b>191.350</b> | <b>199.374</b> | <b>187.495</b> | <b>177.346</b> |

### MITARBEITER NACH BUSINESS AREAS am 30. September 2010 in %

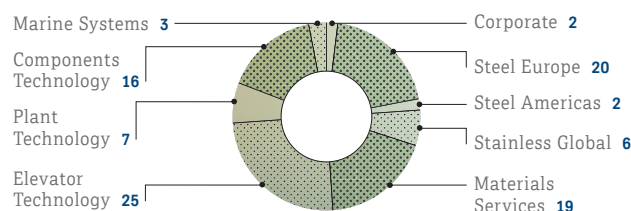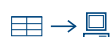

Download der Tabellen unter:  
[http://www.thyssenkrupp.com/financial-reports/09\\_10/de/](http://www.thyssenkrupp.com/financial-reports/09_10/de/)



**MITARBEITER NACH REGIONEN**

|                 | 30.09.2006     | 30.09.2007     | 30.09.2008     | 30.09.2009     | 30.09.2010     |
|-----------------|----------------|----------------|----------------|----------------|----------------|
| Deutschland     | 84.052         | 84.999         | 85.097         | 81.229         | 71.072         |
| Übrige EU       | 39.688         | 41.522         | 42.503         | 38.252         | 35.491         |
| Amerika         | 46.240         | 44.228         | 47.561         | 42.897         | 42.417         |
| Asien/Pazifik   | 11.956         | 14.890         | 17.881         | 18.481         | 21.544         |
| Übrige Länder   | 5.650          | 5.711          | 6.332          | 6.636          | 6.822          |
| <b>Weltweit</b> | <b>187.586</b> | <b>191.350</b> | <b>199.374</b> | <b>187.495</b> | <b>177.346</b> |

**MITARBEITER NACH REGIONEN am 30. September 2010 in %**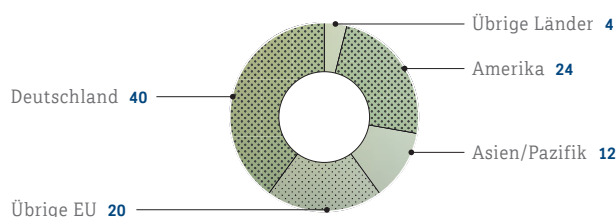

Der Personalaufwand belief sich 2009/2010 auf 8,8 Mrd € und lag damit 9 % niedriger als ein Jahr zuvor. Die unten stehende Grafik zeigt die Entwicklung seit 2005/2006:

**PERSONALAUFWAND in Mio €**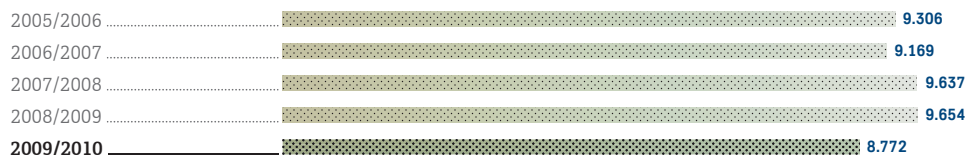**Starker Rückgang der Kurzarbeit**

Im Berichtsjahr ist die Kurzarbeit bei ThyssenKrupp erheblich zurückgegangen. Hatten im Oktober 2009 noch 12.612 Mitarbeiter kurzgearbeitet, waren es im September 2010 nur 2.411 Mitarbeiter. Der Höchststand hatte im April 2009 bei 38.020 Mitarbeitern gelegen. Gerade in Deutschland konnten wir 2009/2010 die Kurzarbeit stark zurückfahren.

Viele Mitarbeiter haben sich in den Kurzarbeitszeiten weiter qualifiziert. Teilweise fand die Weiterbildung in eigenen Bildungszentren der Konzernunternehmen statt; in anderen Fällen gab es externe Kurse. Sehr gefragt waren auch die E-Learning-Angebote.

**Ausbildung****Ausbildungsquote auf 6,2 % gesteigert**

ThyssenKrupp bildet seit Jahrzehnten über den eigenen Bedarf hinaus aus. Wir berücksichtigen dabei neben dem prognostizierten Fachkräftebedarf der kommenden Jahre vor allem die gesellschaftspolitische Verantwortung, jungen Menschen eine berufliche Perspektive zu bieten. Über 170 hauptberufliche Ausbilder und zahlreiche Ausbildungsverantwortliche engagierten sich, damit im Berichtsjahr knapp 1.250 Jugendliche und junge Erwachsene erfolgreich in eine hochwertige und praxisnahe Ausbildung starten konnten.

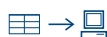

Download der Tabellen unter:  
[http://www.thyssenkrupp.com/financial-reports/09\\_10/de/](http://www.thyssenkrupp.com/financial-reports/09_10/de/)



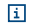

ThyssenKrupp bildet in 70 technischen und kaufmännischen Berufen aus.

Wir haben die Ausbildungsquote 2009/2010 von 6,0 % auf 6,2 % weiter gesteigert. Zum 30. September 2010 absolvierten allein in Deutschland 4.400 junge Menschen eine Ausbildung in unseren Betrieben und Büros.

Als internationaler Konzern mit gutem Ruf und anerkannter Kompetenz gilt ThyssenKrupp als attraktiver Arbeitgeber, so dass wir nach wie vor offene Ausbildungsstellen mit qualifizierten Bewerbern erfolgreich besetzen können. Die Anzahl an Bewerbungen je Ausbildungsplatz liegt seit Jahren auf hohem Niveau. Von den 70 Berufen, die bei ThyssenKrupp erlernt werden können, liegen die meisten im industriellen bzw. technischen Bereich. Spitzenreiter war 2009/2010 erneut die Ausbildung zum Industriemechaniker, dicht gefolgt vom Mechatroniker und Elektroniker.

### Ausbildungspakt – ein voller Erfolg

Für den zwischen Wirtschaft und Politik geschlossenen Nationalen Pakt für Ausbildung kann ThyssenKrupp eine positive Bilanz ziehen. Während der Laufzeit des Paktes, der in diesem Jahr zur Verlängerung ansteht, haben wir von 2004 bis 2010 insgesamt über 660 zusätzliche Ausbildungsplätze geschaffen und knapp 500 Plätze zur Einstiegsqualifizierung angeboten. Dieser Erfolg ist vor allem unseren Ausbildern zu verdanken, die alle Teilnehmer intensiv fachlich und sozialpädagogisch betreuten.

## Altersteilzeit und betriebliche Altersversorgung

### Altersteilzeit weiterhin ein wichtiges personalpolitisches Instrument

Im Konzern befanden sich am 30. September 2010 insgesamt 4.068 Mitarbeiter in Altersteilzeit. Auch wenn Altersteilzeitverträge, die nach dem 01. Januar 2010 begannen, nicht mehr von der Bundesagentur für Arbeit gefördert werden, ist die Altersteilzeit weiterhin ein wichtiges personalpolitisches Instrument bei ThyssenKrupp.

### Moderne betriebliche Altersversorgung

Die Mitarbeiter werden sich immer mehr bewusst, wie wichtig die betriebliche Altersversorgung für das Einkommen nach dem Berufsleben ist. Dazu hat eine Vielzahl gesetzlicher Änderungen in den vergangenen Jahren beigetragen, sei es ein späteres Renteneintrittsalter oder die geringeren Leistungen aus dem gesetzlichen Rentensystem. Die betriebliche Altersversorgung bei ThyssenKrupp ist ein maßgebliches Element der Vergütungspolitik. Bereits vor Jahren haben wir sie deshalb neu ausgerichtet. Heute sind arbeitgeber- und arbeitnehmerfinanzierte Altersversorgung miteinander kombiniert, wobei die Mitarbeitervorsorge vom Arbeitgeber noch zusätzlich honoriert wird. Die angebotene Auswahl zur mitarbeiterfinanzierten Altersvorsorge deckt das gesamte steuerlich geförderte Spektrum ab. Besonders gefragt sind die konzernspezifischen, auf Bruttoentgeltumwandlung basierenden Vorsorgeprodukte.

## Hochschulen und akademischer Nachwuchs

Unsere Mitarbeiter sind das Fundament für starkes Wachstum und den Erfolg des ThyssenKrupp Konzerns. Dementsprechend investieren wir bereits vor dem Berufseinstieg mit einer Vielzahl von Programmen in Qualifizierung und Entwicklung. Hierbei beginnt in vielen Fällen unser Beitrag schon vor der Beschäftigung im Konzern. Durch eine Reihe von neuen Maßnahmen unterstützen wir Studierende in ihrer Berufs- und Kompetenzentwicklung und halten enge Beziehungen zu immer mehr Universitäten und Fachhochschulen. Neben klassischen Seminaren bieten wir den Studierenden auch direkt umsetzbare Workshops zu Themenbereichen wie beispielsweise effizientes Lesen, qualitätsorientiertes



Projektmanagement oder Überzeugungskraft und Durchsetzungsstärke. Zudem haben wir einen Botschafterpool ins Leben gerufen, der Studierenden die Chance bietet, in die Erfahrungswelt von ThyssenKrupp Mitarbeitern Einblick zu nehmen. In Veranstaltungen wie „ThyssenKrupp meets University“ oder in unseren Förderkreisen berichten Mitarbeiter aus den unterschiedlichen Unternehmensbereichen von ihrem beruflichen Werdegang und interessanten Projekten, so dass Studenten die Repräsentanten eines potentiellen Arbeitgebers kennenlernen und von deren Erfahrung profitieren.

#### Karriereportal ausgezeichnet

Eine Schlüsselfunktion für die Suche nach technischen und kaufmännischen Nachwuchstalenten besitzt das ThyssenKrupp Karriereportal im Internet – eine Website für alle, die sich über die Karrierechancen bei uns informieren wollen. Mit attraktiven Multimedia-Elementen beschreiben konkrete Erfahrungsberichte und Videos die Vielfalt der Tätigkeiten im Konzern. Der Erfolg dieses Ansatzes spiegelt sich ebenso in der Platzierung der Karriereseite in einer Bewertung des weltweiten Marktforschungsunternehmens Potentialpark (Platz 3 unter 104 internationalen Unternehmen) wider, wie auch in der Begeisterung und Motivation junger Menschen, die sich für Technik und technische Berufe interessieren.

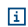

Unsere Kooperationen mit technischen Hochschulen wurden 2009/2010 erfolgreich fortgeführt.

#### Erfolgreiche Hochschulkooperationen

Den ersten persönlichen Kontakt zu ThyssenKrupp erhalten viele Studierende häufig durch unsere erfolgreichen Kooperationen mit technischen Hochschulen in Deutschland, z.B. Aachen, Berlin, Bochum, Dortmund, Dresden, Freiberg und Hamburg-Harburg, aber auch in China und Japan. In Private-Public-Partnership werden innovative Formen der Ausbildungszusammenarbeit zwischen Hochschulen und Unternehmen entwickelt und erprobt.

Zu hervorragenden Studierenden halten wir mit unseren Einstiegsprogrammen „Next Generation“ für Praktikanten und „Your Innovation“ für Doktoranden intensiven Kontakt. Bis zu 120 talentierte Ingenieure und Betriebswirte werden mit umfassenden Maßnahmen gefördert und auf einen Einstieg in unseren Konzern vorbereitet. Durch solche langfristigen Kontakte haben die Studierenden eine sichere Entscheidungsbasis für ihren Berufseinstieg.

## Arbeitsschutz und Gesundheitsvorsorge

#### Weniger Unfälle

Das verstärkte Engagement für Arbeitsschutz und Gesundheitsvorsorge zahlt sich aus. Im vergangenen Geschäftsjahr war die Unfallhäufigkeit im Konzern erneut rückläufig: Die Anzahl der Unfälle ist gegenüber 2008/2009 weltweit um 12 % gesunken. Nach der international üblichen Definition verminderte sich die Unfallhäufigkeit von 11,4 auf 10,2 Unfälle pro 1 Mio Arbeitsstunden. Insgesamt sind die Arbeitsunfälle in den letzten fünf Geschäftsjahren um über 30 % zurückgegangen.

Für ThyssenKrupp sind Sicherheit und Gesundheit der Mitarbeiter neben der Qualität der Erzeugnisse und dem wirtschaftlichen Erfolg ein gleichrangiges Unternehmensziel. Eine präventive Gesundheitspolitik, die Verbesserung der Sicherheit am Arbeitsplatz und der Arbeitsbedingungen sind daher maßgebliche Bestandteile der Führungsaufgaben. Im Rahmen unserer langjährigen Initiative "Null Unfälle" lagen die Schwerpunkte 2009/2010 bei Aktivitäten, die das Sicherheitsbewusstsein insbesondere unserer Führungskräfte schärften. Schwerpunktländer waren Italien, Frankreich, Deutschland und Großbritannien. Für China und die USA bereiten wir derzeit entsprechende Maßnahmen vor.

Die vielen erfolgreichen Aktivitäten des Arbeitsschutzes stehen jedoch im Schatten mehrerer tragischer Unfälle, durch die im Berichtsjahr 14 Mitarbeiter tödlich verletzt wurden. Dies ist ein bedauernder Anstieg gegenüber acht solcher Unfälle im Vorjahr. Vorstand und Aufsichtsrat der ThyssenKrupp AG und alle Belegschaften trauern um sie. Unser besonderes Mitgefühl gilt den Angehörigen.



## Führungskräfteentwicklung

Die seit 2006/2007 eingeführten und bewährten Systeme der Führungskräfteentwicklung bei ThyssenKrupp haben wir weiter gefestigt und engagiert vorangetrieben. Mit dem nun etablierten ThyssenKrupp PerspActive-Prozess – der konzernweit einheitlichen Systematik zur Managemententwicklung – sowie den neu und klarer definierten Verantwortlichkeiten zwischen zentraler und dezentraler Führungskräfteentwicklung erfolgten wichtige Weichenstellungen. Ganz im Sinne der neuen Konzernstruktur steuert und unterstützt das Corporate Center Executives Management jetzt stärker konzernübergreifend. Die Aufgaben sind zudem um die operative Betreuung der Führungskräfte-Ebene unterhalb des Bereichsvorstands erweitert.

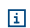

Der PerspActive-Prozess zur Managemententwicklung ist inzwischen konzernweit gut etabliert.

### ThyssenKrupp PerspActive weiterentwickelt

Im Berichtsjahr beschäftigte sich der Konzernvorstand in einer mehrtägigen Klausur ausführlich mit der Besetzungs- und Potenzialstärke im Top-Management und diskutierte wichtige Nachfolgefragen, auch unter Berücksichtigung von personellen Rotationen über die Grenzen der Business Areas hinweg. Grundlagen dieser Vorstandsklausur waren die im Rahmen der jährlichen PerspActive-Prozesse vom jeweiligen Vorgesetzten durchgeführten Führungskräfte-Bewertungen und die daraus resultierenden Diskussionen innerhalb der Business Areas. Seit Beginn des Berichtsjahres werden diese Diskussionen durch das Corporate Center Executives Management begleitet. Konzernweit wurden über 2.500 Führungskräfte von ihren Vorgesetzten bewertet und die Ergebnisse in etwa 50 Management-Development-Gesprächen diskutiert. Vorher hatten wir die Systeme und Prozesse von ThyssenKrupp PerspActive an die veränderte Konzernstruktur angepasst und das bestehende Grading-System der Top-Positionen im Konzern in Zusammenarbeit mit den Business Areas überarbeitet.

### Neues Talent Brokerage

Hochqualifizierte und engagierte Führungskräfte sind eine entscheidende Ressource, und ihre Leistung ist maßgeblich für den unternehmerischen Erfolg von ThyssenKrupp. Mit dem neu geschaffenen Talent Brokerage bietet der Konzern eine Dienstleistung, die den systematischen jährlichen PerspActive-Prozess ergänzt: Sowohl nach geeigneten Kandidaten suchende Vorgesetzte und Personalabteilungen als auch Führungs- und Führungsnachwuchskräfte, die über ihre Weiterentwicklung im Konzern nachdenken, können sich vertrauensvoll an die zentralen Ansprechpartner des Talent Brokerage wenden. So werden zu besetzende Positionen und Kandidaten im Konzern transparent, und veränderungsbereite Mitarbeiter können kompetent über weitere Entwicklungsmöglichkeiten beraten werden.

Darüber hinaus unterstützt der Bereich Talent Brokerage den Einstieg in die Top-2.000-Führungspositionen unseres Konzerns. Um dafür führungsstarke Nachwuchskräfte zu identifizieren, setzen wir neben den Bewertungen durch die Vorgesetzten auf die konzernweiten Development Center. Dort stellen die Kandidaten in mehreren Übungen ihre Managementkompetenzen unter Beweis.

### Academy als leistungsstarke Plattform des Lernens etabliert

Seit 2006 bietet die ThyssenKrupp Academy Programme für die Top-Führungskräfte im Konzern an. Sie wurde in kurzer Zeit zu einem wesentlichen Ort der Wissensvermittlung, des Lernens sowie der internen Vernetzung. Ziel der Academy ist es, als strategische Konzerninitiative die Managementkompetenzen der ca. 2.000 Top-Führungskräfte des Konzerns zu stärken und leistungsstarke Nachwuchskräfte auf die Übernahme anspruchsvoller Aufgaben vorzubereiten.

Immer geht es in den bedarfsgerecht entwickelten Programmen um die Aufnahme von State-of-the-Art-Wissen, aber auch um das Hinterfragen bisheriger Handlungsmuster, Lösungsansätze, etablierter Strukturen und Sichtweisen. Zum Kernauftrag der Academy gehören die Themen General Management, Leadership und Communication Training. Heute stehen die Innovationskraft, die motivierende



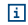

Mehr als 1.000 Führungskräfte nahmen 2009/2010 an den Programmen der ThyssenKrupp Academy teil.

Führungsfähigkeit und die unternehmerisch denkende Eigenverantwortung bei jeder Führungskraft im Vordergrund. Aber auch die effektive, kommunikative Vermittlung der notwendigen Veränderungsprozesse ist wichtig, da nur ein wachsaes Reagieren auf Marktveränderungen und ein innovatives Handeln die Kundenzufriedenheit und damit das Geschäft stärken.

Die ThyssenKrupp Academy hatte auf die Wirtschafts- und Finanzkrise mit Kostenreduktion und veränderten Angeboten zeitnah reagiert. Insgesamt nahmen im Berichtsjahr 1.051 Führungskräfte an Programmen teil. Damit erhöhte sich die Zahl der Teilnehmer seit 2006 auf 4.138, wobei einige Führungskräfte bereits mehrere Angebote der Academy wahrgenommen haben. Seit ihrem Bestehen verzeichnete die Academy 13.528 Teilnehmertage, wovon 3.312 auf 2009/2010 entfielen.

## Vielfalt als personalpolitisches Ziel

ThyssenKrupp strebt an, den Anteil weiblicher und internationaler Führungskräfte auf allen Managementebenen schrittweise zu erhöhen. Wir fördern eine Unternehmenskultur, die Vielfalt ermöglicht und wertschätzt. Hierzu gehört es auch, dass Barrieren identifiziert und nachhaltig beseitigt werden, um allen potenziellen Führungs- und -nachwuchskräften gleichberechtigte, allein auf Leistung und Potenzial beruhende Karrierechancen zu ermöglichen. Bei der Besetzung von Führungspositionen werden deshalb ausdrücklich internationale und/oder weibliche Kandidaten in die Besetzungsverfahren einbezogen. Hinzu kommen weitere Maßnahmen.

### Mehr Internationalität

Um die Transparenz sowohl über interessierte internationale Kandidaten als auch über offene Führungspositionen im Konzern zu verbessern, werden wir die neu geschaffene Talent-Brokerage-Plattform und die im internationalen Kontext durchgeführten Development Center weiter ausbauen. Schon lange tragen unsere konzernweiten Trainee-Programme durch ihre weltweiten Einsatzstandorte verstärkt zum internationalen Austausch bei.

Weiterhin unterstützen wir die Integration von Mitarbeiterinnen und Mitarbeitern mit internationalem Hintergrund. So haben sich beispielsweise bei ThyssenKrupp Steel Europe rund 70 Vertrauensleute allein am Standort Duisburg zu Kulturmittlern ausbilden lassen. In 120 Fortbildungsstunden haben sie gelernt, mit alltäglichen Konflikten, die auf unterschiedlichen kulturellen Hintergründen beruhen, umzugehen und den internen Dialog konstruktiv zu fördern. Dieser wichtige Beitrag zur Förderung der Unternehmenskultur wurde mit dem Duisburger Preis für Toleranz und Zivilcourage ausgezeichnet.

### Förderung von Frauen

Neben dem generellen Ziel, in allen Bereichen und Hierarchieebenen des Konzerns mehr Frauen Entwicklungschancen zu bieten, ist ThyssenKrupp als stark technisch ausgerichtetes Unternehmen besonders an weiblichen Ingenieuren interessiert. Leider ist die Zahl der Studentinnen technischer Studiengänge im Vergleich zu ihren männlichen Kommilitonen noch sehr niedrig; ihr Anteil liegt bei etwa 20 %. Eine Initiative des Konzerns, um dies zu ändern, ist die Förderung des Femtec-Netzwerks an der Technischen Universität Berlin. Dieses Hochschulkarrierezentrum für Frauen setzt sich mit Erfolg dafür ein, junge Frauen für das Studium der Ingenieur- und Naturwissenschaften zu begeistern, besonders ambitionierte Studentinnen der technischen Studiengänge früh mit potenziellen Arbeitgebern bekannt zu machen und so den weiblichen Führungsnachwuchs zu fördern.

Darüber hinaus wollen wir Familie und Beruf besser vereinbar machen; zu unseren Fördermaßnahmen zählen sowohl Teilzeitmodelle als auch der Neubau einer Kindertagesstätte auf dem neuen Campus-Gelände in Essen. Die Kindertagesstätte wird ca. 100 Kinder im Alter von bis zu sechs Jahren nach den Prinzipien der bildungsorientierten Reggio-Pädagogik in der Nähe der Eltern ganztägig betreuen.



# Risikobericht

Unser Risikomanagementsystem haben wir im abgelaufenen Geschäftsjahr kontinuierlich weiterentwickelt. Neue Konzernstandards erhöhten die Transparenz weiter, so dass wir Risiken noch besser erkennen und bewerten können. Aus heutiger Sicht sind alle Risiken begrenzt und überschaubar; der Bestand des Unternehmens ist sicher.

## Risikomanagement effizient organisiert

### Risikopolitik als Teil der Unternehmensstrategie

Die Risikopolitik bei ThyssenKrupp basiert auf der Unternehmensstrategie. Sie ist darauf ausgerichtet, den Bestand des Unternehmens zu sichern und den Unternehmenswert nachhaltig zu steigern. Unternehmerischer Erfolg setzt voraus, dass Chancen erkannt und damit verbundene Risiken identifiziert und bewertet werden. Die Chancen sollen optimal genutzt und die unternehmerischen Risiken bewusst und eigenverantwortlich getragen sowie aktiv gesteuert werden, sofern damit eine angemessene Wertsteigerung erzielt werden kann.

Risiken, die außerhalb unserer Kernprozesse und -kompetenzen liegen, verlagern wir bei Bedarf auf andere Risikoträger oder reduzieren sie durch angemessene Risikosteuerungsmaßnahmen. Darüber hinaus werden Risiken möglichst vermieden. Insgesamt kann der Konzern die eingegangenen Risiken weitestgehend abdecken.

ThyssenKrupp hat die Rahmenbedingungen für ein ordnungsgemäßes und zukunftsgerichtetes Risikomanagement in der Neufassung der Konzernrichtlinie Risikomanagement dokumentiert. Jeder Mitarbeiter ist zu einem bewussten und selbstverantwortlichen Umgang mit Risiken und Chancen im Rahmen seiner Kompetenzen aufgefordert. Die Verantwortung, Risiken entlang der Wertschöpfungskette zu erfassen und zu steuern, liegt bei den jeweils operativ Verantwortlichen in den dezentralen Organisationseinheiten.

Konzernweit geltende Verhaltensregeln sind Bestandteil der risikopolitischen Grundsätze. So gelten die Grundsätze der Fairness und Verantwortung gegenüber Lieferanten, Kunden und anderen Geschäftspartnern. Die Compliance-Vorgaben des Konzerns sind zu beachten, und spekulative Geschäfte sind grundsätzlich verboten. Die Einhaltung der Grundsätze prüfen wir durch regelmäßige Kontrollen. Zudem führen wir zahlreiche und wiederholte Compliance- und Risikomanagement-Schulungen durch, um allen Mitarbeitern die Bedeutung der Vorgaben zu verdeutlichen.

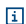

Die Konzernrichtlinie zum Risikomanagement wurde im Berichtsjahr neu gefasst.



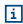

Das Risikomanagementsystem wurde an die neue Konzernorganisation angepasst.

Risikomanagementsystem im Konzern weiterentwickelt

Im abgelaufenen Geschäftsjahr haben wir die Risikomanagement-Prozesse umfassend weiterentwickelt. Die aktualisierte Konzernrichtlinie Risikomanagement enthält neben den risikopolitischen Grundsätzen die wesentlichen Standards zu den Prozessen sowie den verschiedenen Reporting-Elementen des Risikomanagements. Sie formuliert verbindliche Vorgaben zur frühzeitigen Erkennung, Berichterstattung, Bewertung, Steuerung und Überwachung von Risiken. Die Konzernberichterstattung fokussiert sich auf die im Rahmen des Risikoinventurprozesses eindeutig definierten materiellen Risiken. Diese werden vom Konzern-Risikomanagement, das seit dem 01. Oktober 2009 im Corporate Center Controlling angesiedelt ist, aufbereitet, in einem neu etablierten Risk Committee bewertet und dann für den Konzernvorstand und den Prüfungsausschuss des Aufsichtsrats systematisch und transparent aufbereitet.

RISIKOMANAGEMENT BEI THYSSENKRUPP

| Konzernsteuerung                                                                                                                                                       | Compliance/<br>Risikokoordination                                                                                                                                             | Prozesse                                                                                                                                                                                                                      | Geschäftssteuerung                                                                                                                                                                        |
|------------------------------------------------------------------------------------------------------------------------------------------------------------------------|-------------------------------------------------------------------------------------------------------------------------------------------------------------------------------|-------------------------------------------------------------------------------------------------------------------------------------------------------------------------------------------------------------------------------|-------------------------------------------------------------------------------------------------------------------------------------------------------------------------------------------|
| <div>Vorstand<ul style="list-style-type: none"><li>Festlegung risikopolitischer Grundsätze und Richtlinien</li><li>Fokussierung auf materielle Risiken</li></ul></div> | <div>Risk Committee<ul style="list-style-type: none"><li>Risikoüberwachung</li><li>Risikosteuerung</li><li>Umsetzung/Überwachung des internen Kontrollsystems</li></ul></div> | <div>Corporate Center Controlling<ul style="list-style-type: none"><li>Definition von Konzernstandards</li><li>Risikoberichterstattung</li><li>Verzahnung mit Controlling/ Risikomanagement in Business Areas</li></ul></div> | <div>Business Areas<ul style="list-style-type: none"><li>Ermittlung, Berichterstattung und Prognose von Chancen und Risiken, insbesondere veränderter materieller Risiken</li></ul></div> |

In einem eingespielten und durch ein konzernweites web-basiertes Reportingtool unterstützten Prozess informieren die Konzernunternehmen in Risikoinventuren mit abgestuften Schwellenwerten über den aktuellen Status ihrer Risikosituation. Dabei werden die Risiken nach Eintrittswahrscheinlichkeit und Schadenshöhe bewertet und klassifiziert. Zu jedem Risiko werden Maßnahmen zur Risikosteuerung aufgeführt und im Rahmen eines Maßnahmencontrolling überwacht. Zur Risikobeurteilung werden Frühwarnindikatoren herangezogen, regelmäßig aktualisiert und mit den Verantwortlichen erörtert.

Risikomanagement ist bei ThyssenKrupp eine wichtige unternehmerische Kernfunktion. Es ist mit den Planungs- und Reportingprozessen des Controlling integral verknüpft und dadurch ein bedeutender Bestandteil der wertorientierten Unternehmensführung. Eine monatlich aktualisierte Betrachtung operativer Chancen und Risiken sowie eine Aktualisierung der materiellen Risiken, die auch im Rahmen der regelmäßigen Konzern-Vorstandssitzungen zeitnah beraten wird, ergänzen den Risikoinventurprozess.

Das vom Vorstand der ThyssenKrupp AG für den gesamten Konzern eingeführte Risikomanagementsystem hat sich als effizient bewährt. Neben den Standardprozessen ist sichergestellt, dass Ad-hoc-Risiken und eingetretene Schäden unabhängig von den normalen Berichtswegen unmittelbar kommuniziert werden.

Die Konzernrevision hat auch im abgelaufenen Geschäftsjahr weltweit die Einhaltung der Vorgaben des Risikomanagementsystems in den Konzernunternehmen geprüft. Die Erkenntnisse aus diesen Audits werden genutzt, um die Früherkennung und Steuerung der Risiken weiter zu verbessern. Außerdem entwickeln wir kontinuierlich die Instrumente und Methoden zur Risikoerfassung und -steuerung weiter, um die manuellen Tätigkeiten im Risikomanagementprozess zu verringern und die Qualität der Informationsinhalte zu erhöhen.



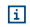

Das interne Kontroll- und Risikomanagementsystem umfasst auch den Prozess der Konzernrechnungslegung.

### Wesentliche Merkmale des internen Kontroll- und Risikomanagementsystems im Hinblick auf den Konzernrechnungslegungsprozess

Wir definieren das interne Kontrollsystem als Gesamtheit aller aufeinander abgestimmten Grundsätze, Verfahren und Maßnahmen, die im Unternehmen angewendet werden, um die Erreichung der Geschäfts- und Kontrollziele zu gewährleisten. Dazu gehören insbesondere die Sicherheit und Effizienz der Geschäftsabwicklung, die Zuverlässigkeit der Finanzberichterstattung sowie die Übereinstimmung mit Gesetzen und Richtlinien. Diese grundsätzlichen Aspekte des internen Kontrollsystems gelten insbesondere auch für den Rechnungslegungsprozess bei ThyssenKrupp. Ziel des internen Kontrollsystems für den Rechnungslegungsprozess ist es, durch implementierte Kontrollen hinreichend sicherzustellen, dass trotz möglicher Risiken ein regelungskonformer Konzernabschluss erstellt wird. Verschiedene prozessintegrierte und prozessunabhängige Überwachungsmaßnahmen tragen dazu bei, dieses Ziel zu erreichen.

Der Prozess der Konzernabschlusserstellung basiert auf einer einheitlichen, regelmäßig aktualisierten und allen relevanten Konzernmitarbeitern über eine konzerninterne Internet-Plattform zur Verfügung gestellten Bilanzierungsrichtlinie; er wird in einem konzernweit einheitlichen Konsolidierungstool auf Basis von Standardsoftware abgewickelt. Dies minimiert das Risiko von Falschaussagen in der Konzernrechnungslegung und in der externen Berichterstattung.

Der Prozess der Finanzberichterstattung bei ThyssenKrupp besteht aus eindeutig definierten Teilprozessen mit klaren Verantwortlichkeiten unter Wahrung des Prinzips der Funktionstrennung und des Vier-Augen-Prinzips. Dies reduziert das Risiko von dolosen Handlungen.

Die fachliche Verantwortung für die Erstellung des Konzernabschlusses liegt beim Corporate Center Accounting and Financial Reporting. Verbindliche inhaltliche und terminliche Vorgaben minimieren den Ermessensspielraum der dezentralen Einheiten bei Ansatz, Bewertung und Ausweis von Vermögenswerten und Schulden und reduzieren damit das Risiko konzernuneinheitlicher Rechnungslegungspraktiken.

Unsere Konzernunternehmen erstellen ihre lokalen Abschlüsse teilweise unter Nutzung von konzern eigenen Shared-Service-Centern. Für den Konzernabschluss werden die ermittelten Daten in das konzernweit relevante Konsolidierungstool eingespielt. Die in den Rechnungslegungsprozess eingebundenen Mitarbeiter werden regelmäßig geschult und durch zentrale Ansprechpartner unterstützt.

Wir setzen maßgeschneiderte Berechtigungskonzepte und Zugangsbeschränkungen ein, um die verwendeten Finanzsysteme vor Missbrauch zu schützen. Eine zentrale Steuerung und Überwachung der relevanten IT-Systeme sowie regelmäßige Systemsicherungen reduzieren das Risiko von Datenverlusten und Systemausfällen. Systemtechnische Kontrollen im Rahmen des Konsolidierungsprozesses werden überwacht und durch manuelle Stichprobenprüfungen erfahrener Mitarbeiter ergänzt.

Die Wirksamkeit des internen Kontroll- und Risikomanagementsystems in den rechnungslegungsrelevanten Prozessen wird regelmäßig durch unsere Konzernrevision überprüft.

Mit den von uns eingerichteten Prozessen, Systemen und Kontrollen gewährleisten wir eine hinreichende Sicherheit, dass der Konzernrechnungslegungsprozess im Einklang mit den International Financial Reporting Standards (IFRS), dem HGB sowie anderen rechnungslegungsrelevanten Regelungen und Gesetzen erfolgt und zuverlässig ist. Eine absolute Sicherheit, dass keine Fehler vorkommen, kann auch unser internes Kontrollsystem im Hinblick auf den Konzernrechnungslegungsprozess nicht bieten.

### Nutzung von Chancen bei gleichzeitiger Risikosteuerung

In Übereinstimmung mit den Vorgaben der risikopolitischen Grundsätze stehen den von uns eingegangenen Risiken angemessene Chancen gegenüber. Diese identifizieren, bewerten, steuern und kontrollieren wir systematisch. Einzelheiten können Sie in unserem Chancenbericht auf den Seiten 178–180 nachlesen. Zur Deckung der Risiken aus strategischen Entscheidungen treffen wir im erforderlichen Maße Risikovorsorge.

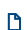

Einzelheiten: Seiten 178–180



### Risikotransfer durch zentralen Dienstleister

ThyssenKrupp Risk and Insurance Services als zentraler Dienstleister übernahm 2009/2010 wie in den Jahren zuvor den Risikotransfer auf Versicherer und schloss die notwendigen Konzernversicherungsverträge ab. In Schadensanalysen wird das Risikopotenzial regelmäßig bewertet; auf dieser Basis wird der Versicherungsschutz gestaltet. Insbesondere bei einigen Produktionsanlagen der Business Areas Steel Europe und Stainless Global bestehen bei den Sach- und Betriebsunterbrechungsversicherungen zum Teil signifikante Selbstbehalte, so dass ein Schadensfall die Vermögens-, Finanz- und Ertragslage des Konzerns spürbar beeinträchtigen könnte. Das Risiko einer möglichen Insolvenz eines Versicherers wird dadurch vermindert, dass wir den Risikotransfer auf viele Versicherer verteilen und grundsätzlich nur solche Versicherer auswählen, die ein Rating von mindestens A- vorweisen können.

Um die Risikoprävention weiterzuentwickeln und zu optimieren, bestehen für alle Konzernunternehmen verbindliche Standards. An diesen Prozessen sind Experten aus allen Teilen des Konzerns unter Leitung von ThyssenKrupp Risk and Insurance Services beteiligt. Interne und externe Audits prüfen regelmäßig, ob diese Standards eingehalten werden.

## Zentrale Risikofelder im Fokus

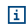

Zur Minimierung finanzwirtschaftlicher Risiken führen wir fortlaufende Überprüfungen und intensive Kontrollen durch.

### Finanzwirtschaftliche Risiken

Zu den zentralen Aufgaben der ThyssenKrupp AG als Konzernführungsgesellschaft zählt es, den Finanzbedarf innerhalb des Konzerns zu koordinieren, zu lenken und die finanzielle Unabhängigkeit des Gesamtunternehmens sicherzustellen. Dazu optimieren wir die Konzernfinanzierung und begrenzen die finanzwirtschaftlichen Risiken. Fortlaufende Überprüfungen und intensive Kontrollen minimieren die Risiken auf den einzelnen finanzwirtschaftlichen Risikofeldern.

**Kreditrisiko (Ausfallrisiko):** Wir schließen Finanzinstrumente im Finanzierungsbereich grundsätzlich nur mit solchen Kontrahenten ab, die über eine sehr gute Bonität verfügen bzw. einem Einlagensicherungsfonds angeschlossen sind. Dabei werden zur weiteren Risikominimierung Geschäfte nur im Rahmen vorgegebener Kontrahentenlimite getätigt. Im Liefer- und Leistungsgeschäft werden Außenstände und Ausfallrisiken von den Konzernunternehmen fortlaufend überwacht; teilweise sind sie zusätzlich über Warenkreditversicherungen abgesichert. Besonders intensiv beobachten wir die Bonität von Großkunden.

**Liquiditätsrisiko:** Um jederzeit die Zahlungsfähigkeit sowie die finanzielle Flexibilität des Konzerns sicherstellen zu können, halten wir auf Basis einer mehrjährigen Finanzplanung sowie einer monatlich rollierenden Liquiditätsplanung langfristige Kreditlinien und liquide Mittel vor. Das Cash-Pooling sowie externe Finanzierungen konzentrieren sich vorwiegend auf die ThyssenKrupp AG sowie spezielle Finanzierungsgesellschaften. Im Rahmen des Cash-Pooling werden die Mittel bedarfsgerecht intern an Konzernunternehmen weitergeleitet.

**Marktrisiko:** Eine Reihe von Maßnahmen begrenzt die Schwankungen der Zeitwerte oder künftiger Zahlungsströme aus originären oder derivativen Finanzinstrumenten wegen Marktänderungen oder sie schaltet diese ganz aus. Hierzu gehören im Wesentlichen außerhalb der Börse gehandelte Devisentermingeschäfte, Zinsswaps, Zins-/Währungsderivate und Warentermingeschäfte mit Banken und Handelspartnern. Die Warenpreise werden darüber hinaus auch durch börsengehandelte Futures abgesichert. Außerdem überwachen wir umfassend den Einsatz von derivativen Finanzinstrumenten, wobei die Kontrollen auf Basis von Richtlinien im Rahmen des regelmäßigen Reporting erfolgen.



**Währungsrisiko:** Um die Risiken aus der Vielzahl unserer Zahlungsströme in unterschiedlichen Währungen – vor allem in US-Dollar – zu begrenzen, haben wir konzerneinheitliche Richtlinien für das Devisenmanagement entwickelt. Grundsätzlich müssen alle Unternehmen unseres Konzerns Fremdwährungspositionen im Zeitpunkt ihrer Entstehung sichern; Unternehmen mit Sitz im Euro-Raum sichern grundsätzlich über unsere zentrale Clearing-Stelle. Translationsrisiken – also Bewertungsrisiken für Bilanzbestände aus der Umrechnung von Fremdwährungspositionen – werden grundsätzlich nicht abgesichert.

**Zinsrisiko:** Wir haben zur Deckung unseres Kapitalbedarfs Liquidität an den internationalen Geld- und Kapitalmärkten in verschiedenen Währungen – überwiegend im Euro- und US-Dollar-Raum – und mit unterschiedlichen Laufzeiten aufgenommen. Teilweise sind die hieraus resultierenden Finanzschulden sowie unsere Geldanlagen dem Risiko ausgesetzt, dass sich die Zinsen ändern. Für die Steuerung erstellen wir deshalb regelmäßig Zinsanalysen, deren Ergebnisse in unser Risikomanagementsystem einfließen.

**Warenpreisrisiko:** Je nach Marktsituation können die Einkaufspreise für Rohstoffe und Energie erheblich schwanken. Den Preissteigerungen auf den Beschaffungsmärkten für Eisenerz und Koks-kohle im Zusammenhang mit der Umstellung der Rohstofflieferverträge von Jahres- auf Quartalsbasis begegnen wir unter anderem mit einer entsprechenden Anpassung unserer Verkaufsverträge. Zur Absicherung von Risiken aus schwankenden Rohstoffpreisen, insbesondere bei Nickel und Kupfer, setzen wir auch derivative Finanzinstrumente – im Wesentlichen Warentermingeschäfte – ein. Für den Abschluss solcher Finanzinstrumente gelten strenge Richtlinien. Details über diese Risikofelder stehen im Anhang zum Konzernabschluss unter Nr. 22.

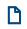

Einzelheiten: Seiten 233–241

### Auftragsrisiken

Die Abwicklung von Großaufträgen ist risikobehaftet. Kosten- und/oder Terminüberschreitungen sind bei technischen Problemen sowie bei Qualitätsproblemen mit Unterlieferanten denkbar. Zur Begrenzung dieser Risiken verbessern wir kontinuierlich unsere Steuerungsinstrumente und setzen erfahrene Projektmanager ein. Das Risiko von Zahlungsausfällen minimieren wir durch sorgfältige Auswahl der Kunden, einen ständigen Kontakt und zeitnahe Zahlungen nach Baufortschritt.

### Absatzrisiken

Die internationale Konjunkturentwicklung ist für ThyssenKrupp als weltweit tätigen Konzern ein wesentlicher Einflussfaktor auf die Chancen- und Risikoposition. Marktrisiken begegnen wir fortdauernd mit einem Bündel von Maßnahmen. Intensiv und kontinuierlich beobachten wir die wirtschaftliche Entwicklung der einzelnen Länder und Handelsströme, um die Absatzrisiken möglichst gering zu halten. Bei Bedarf reagieren wir zeitnah durch die Anpassung unserer Produktion und Kapazitäten.

Unsere internationale Präsenz in verschiedenen Geschäftsfeldern macht uns weitgehend unabhängig von regionalen Krisen. Die stark differenzierte Produkt- und Kundenstruktur in unseren Business Areas reduziert unsere Absatzrisiken auf Teilmärkten. Forderungsausfallrisiken durch eine verschlechterte Bonität einzelner Großabnehmer begegnen wir mit einem effektiven Debitorenmanagement. Die Absatzrisiken sind im Einzelnen im Abschnitt „Spezifische Risiken unserer Aktivitäten“ beschrieben.



### Risiken aus Geschäftsbeziehungen zu Kunden in Ländern mit Handelsbeschränkungen

Durch die weltweite Ausrichtung unterhält ThyssenKrupp auch Geschäftsbeziehungen in Ländern, die Handelsbeschränkungen unterliegen. Im abgelaufenen Geschäftsjahr haben die Bundesrepublik Deutschland, die EU und die USA auf Basis der UN-Resolution 1929 bestehende Handelsbeschränkungen für die Islamische Republik Iran auf Geschäftsfelder der Petroleumindustrie ausgedehnt und weitere Personen sowie etliche Banken, mit denen keine Geschäfte mehr gemacht werden dürfen, auf Sanktionslisten gesetzt. Verstöße gegen die verschärften Handelsbeschränkungen stehen unter erheblichen Strafen und können für ThyssenKrupp zu Reputationsschäden führen. Wir achten seit jeher auf die Einhaltung von exportkontrollrechtlichen Vorschriften und insbesondere von Handelsbeschränkungen. Der Vorstand der ThyssenKrupp AG hat zusätzlich die bereits vor Inkrafttreten der verschärften Handelsbeschränkungen bestehenden Geschäftsaktivitäten mit iranischen Kunden auf ihre Übereinstimmung mit den neuen Gesetzen überprüfen lassen und im September 2010 beschlossen, dass ThyssenKrupp keine neuen Geschäfte mit iranischen Kunden mehr abschließt. Durch diese Maßnahmen wird das Risiko eines potenziellen Verstoßes gegen die bestehenden Handelsbeschränkungen deutlich reduziert.

### Beschaffungsrisiken

Im Berichtsjahr waren unsere Aktivitäten insbesondere mit steigenden Beschaffungspreisen auf den Rohstoffmärkten konfrontiert. Diesen Herausforderungen begegnen wir zeitnah durch Intensivierung unserer Kundengespräche, um die höheren Kosten möglichst in den Produktpreisen weiterzugeben.

Auch die Energiekosten (Strom, Erdgas) sind in den letzten Jahren teils erheblich angestiegen. Eine strukturierte Beschaffung auf dem Strommarkt sowie langfristige Erdgasverträge reduzieren die Risiken auf den Energiemärkten. Hier konnten im abgelaufenen Geschäftsjahr günstige Einkaufsbedingungen auch für die Folgejahre verhandelt werden.

Unser Einkaufsbereich sucht darüber hinaus weltweit ständig alternative und kostengünstige Lieferanten, um die Risiken von Lieferausfällen zu begrenzen. Eine geografische Streuung der Aufträge macht uns unabhängiger von regionalen Lieferengpässen und hilft, bei lokalen Lieferschwierigkeiten auf Beschaffungsalternativen auszuweichen. Einzelheiten zu unserem Beschaffungsmanagement finden Sie auf den Seiten 111–115.

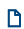

Einzelheiten: Seiten 111–115

### Risiken aus Käufen, Verkäufen und Restrukturierungen

Restrukturierungen sowie der Verkauf oder Erwerb von Grundstücken, Unternehmen oder sonstigen Geschäftsaktivitäten sind mit Risiken verbunden, die kontinuierlich überwacht und bei Bedarf durch entsprechende bilanzielle Vorsorge berücksichtigt werden.

### Rechtliche Risiken aus Klagen und Ansprüchen Dritter

Rechtliche Risiken können sich aus Klagen ergeben. Die entsprechenden Verfahren begleitet ThyssenKrupp durch erfahrene eigene Justiziere, bei Bedarf mit zusätzlicher Unterstützung externer Anwälte. Schadensersatzklagen aus Produkthaftung minimieren wir durch qualitativ hochwertige Produkte.

Wenn Vertragspartner aus Anlagenbau-, Liefer- und Leistungsverträgen Ansprüche gegen ThyssenKrupp erheben, prüfen wir die einzelnen Ansprüche sorgfältig und bilden Rückstellungen, wenn Zahlungsverpflichtungen als wahrscheinlich angesehen werden.

Unser striktes Compliance-Programm reduziert auf allen Konzernebenen das Risiko von Kartell- und Korruptionsverstößen. Im Compliance-Commitment hat der Vorstand der ThyssenKrupp AG unmissverständlich zum Ausdruck gebracht, dass Kartellverstöße oder Verstöße gegen die Vorschriften zur Korruptionsbekämpfung im Konzern nicht geduldet werden. Unsere ergänzenden Richtlinien und Informationsschriften wie auch unsere interne Compliance-Organisation überprüfen und entwickeln wir



regelmäßig weiter. Zuletzt haben wir unsere Compliance-Organisation im Rahmen der Neuorganisation des Konzerns zum 01. Oktober 2009 überprüft und dahingehend angepasst, dass das bestehende ThyssenKrupp Compliance Office um die Compliance-Funktionen der ehemaligen Segmentführungsgesellschaften erweitert wurde.

Zudem wurden die Rechtsberatung organisatorisch und personell von Compliance getrennt sowie eine Funktionstrennung zwischen der Compliance-Beratung einerseits und Grundsatzfragen und Compliance-Ermittlungen andererseits vollzogen. Entsprechend einem vom Vorstand der ThyssenKrupp AG in Auftrag gegebenen Gutachten der Rechtsanwaltskanzlei Hengeler Mueller vom Juni 2010 genügt unsere neue Compliance-Organisation den rechtlichen Anforderungen und spiegelt unsere neue Konzernstruktur zutreffend wider. Außerdem umfasse sie eine Vielzahl von Elementen, um systematisches Fehlverhalten in den Bereichen Korruption und Kartellrecht zu verhindern, entsprechende Warnzeichen rechtzeitig zu erkennen und die erforderlichen Gegenmaßnahmen einzuleiten.

In umfassenden Schulungen und einem interaktiven E-Learning-Compliance-Programm werden unsere Mitarbeiter über die Compliance-Anforderungen, Verstößrisiken und mögliche Sanktionen unterrichtet. Mehr als 2.400 Mitarbeiter weltweit nahmen 2009/2010 an Präsenzs Schulungen teil. Darüber hinaus wurden rund 350 Mitarbeiter zu speziellen Sonderthemen geschult. Die Weiterbildungslehrgänge zum Thema Compliance haben wir durch ein konzernweites online-basiertes E-Learning-Programm ergänzt, das aus den Lernprogrammen Kartellrecht und Korruptionsbekämpfung besteht und in elf Sprachen angeboten wird. Mit der im August 2008 gestarteten zweiten Auflage des E-Learning-Programms werden die Kenntnisse der Mitarbeiter, die früher schon teilgenommen haben, aufgefrischt und erstmalig Mitarbeiter außerhalb Europas geschult. Seit Einführung der zweiten Auflage haben weltweit 21.000 Mitarbeiter Online-Schulungen zum Kartellrecht und rund 25.000 Mitarbeiter zum Thema Anti-Korruption absolviert.

Über schwebende Rechtsstreitigkeiten und Schadensersatzansprüche informieren wir unter Anhang-Nr. 21.

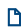

Einzelheiten: Seiten 231–232

### Regulatorische Risiken

Veränderungen der rechtlichen Rahmenbedingungen auf nationaler oder europäischer Ebene können Risiken für unser Geschäft zur Konsequenz haben, die Kosten erhöhen und unsere Absatzmöglichkeiten einschränken. Auch geänderte Wettbewerbsbestimmungen auf Teilmärkten können uns Nachteile bringen. Durch enge Arbeitskontakte mit den relevanten Institutionen stellen wir die notwendigen aktuellen Informationen sicher. Außerdem versuchen wir darauf hinzuwirken, dass Änderungen der rechtlichen Rahmenbedingungen nicht den Wettbewerb verzerren.

Für den Stromverbrauch von Abnahmestellen außerhalb der Härtefallregelung werden die Aufschläge gemäß dem Erneuerbare-Energien-Gesetz in den nächsten Jahren weiter massiv steigen. Die geplanten neuen Regelungen zur Stromsteuer werden uns in Deutschland ebenfalls erheblich belasten.

Aus dem EU-Emissionshandel in der dritten Handelsperiode, die sich von 2013 bis 2020 erstreckt, werden uns auf Basis der uns bekannten Gesetzgebungsentwürfe vermutlich hohe Kosten für Emissionsberechtigungen erwachsen. Wir beobachten den politischen Diskussionsprozess darüber weiterhin intensiv. Für uns als energieintensiver Industrie- und Dienstleistungskonzern bestehen Risiken für die Ertragslage, wenn wir im internationalen Wettbewerb die zusätzlichen Kosten aus einer zunehmenden Auktionierung nicht oder nicht in vollem Umfang an unsere Kunden weitergeben können.

Wir verfolgen darüber hinaus eng die politischen Entwicklungen zur Einführung eines US-Emissionshandelssystems, um rechtzeitig strategische Konzepte umzusetzen und mit unserem Know-how und unserer Erfahrung auch in den USA auf neue Herausforderungen reagieren zu können.



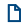

Einzelheiten: Seiten 152–156

### Umweltschutzrisiken

Durch unsere Produktionsprozesse bestehen verfahrensbedingt Risiken, Luft und Wasser zu verunreinigen. Intensive Umweltschutzmaßnahmen und kontinuierliche umweltschonende Investitionen in unseren Produktionsbetrieben helfen, die Umwelt möglichst wenig zu belasten und die Ressourcen nachhaltig zu schonen. Bei ThyssenKrupp gibt es eine hohe Anzahl von Konzernunternehmen mit zertifizierten Umweltmanagementsystemen, was die Gefahr von Umweltschäden vermindert. Weitere Einzelheiten zum Umweltschutz sind im Kapitel „Umwelt- und Klimaschutz“ auf den Seiten 152–156 nachzulesen.

Auf nicht mehr genutzten Grundstücken in unserem Portfolio bestehen aus früheren Geschäftsaktivitäten Altlasten- und Bergschädenrisiken. Hier führen wir vorbeugende Maßnahmen und planmäßige Sanierungsarbeiten durch, für die wir auch im Berichtsjahr Rückstellungen im bilanziell erforderlichen Ausmaß gebildet haben.

### Risiken der Informationssicherheit

Wir überprüfen permanent unsere Informationstechnologien, um die IT-gestützten Geschäftsprozesse möglichst sicher abzuwickeln. Bei Bedarf werden die Systeme aktualisiert und noch effektiver geschützt. Die IT-gestützte Integration unserer Geschäftsprozesse setzt voraus, dass die mit ihr verbundenen Risiken für unsere Konzernunternehmen und für unsere Geschäftspartner minimiert sind. Alle Konzernunternehmen sind deshalb durch interne Richtlinien verpflichtet, eine möglichst hohe Informationssicherheit zu gewährleisten. Auch im abgelaufenen Geschäftsjahr haben wir umfangreiche Maßnahmen getroffen, unser Informationssicherheitsmanagement weiterzuentwickeln. Darüber hinaus erlangten Geschäftsprozesse und Rechenzentren in ausgewählten Konzernunternehmen Sicherheitszertifikate, die vor allem unseren Kunden gegenüber den erreichten Stand dokumentieren. Einen wesentlichen Schritt für höhere Sicherheit haben wir im neuen ThyssenKrupp Quartier in Essen realisiert: Hier konnten wir neueste Technologien bereits in der Planung berücksichtigen und so ein adäquates Schutzniveau erreichen.

Wie bereits in den Vorjahren haben wir die verschiedenen schon etablierten Vorsorgemaßnahmen auch im Berichtsjahr fortgeführt, um unsere IT-Zentren und Computernetze noch sicherer zu machen und gegen Angriffe sowie Störungen von außen effektiver zu schützen. Insbesondere hat das Team „IT Compliance“ die Schulungsangebote und Informationsveranstaltungen für Mitarbeiter und Führungskräfte fortgesetzt und die Teilnehmer für die notwendige Informationssicherheit weiter sensibilisiert.

Gemeinsam mit dem Datenschutzbeauftragten des Konzerns stellen unsere Experten sicher, dass in der Informationsverarbeitung personenbezogene Daten nur gemäß den Regelungen des Bundesdatenschutzgesetzes verarbeitet werden. Alle diese Maßnahmen werden es weiterhin ermöglichen, die Geschäftsinformationen des Konzerns sowie die Privatsphäre unserer Geschäftspartner und Mitarbeiter durch präventive Maßnahmen zu schützen und angemessen auf mögliche neue Risiken zu reagieren.

### Risiken aus Pensions- und Gesundheitsfürsorgeverpflichtungen

Das zur Deckung von Pensionsverbindlichkeiten bestimmte Fondsvermögen ist Kapitalmarktrisiken ausgesetzt. Um diese möglichst gering zu halten, werden die einzelnen Anlageformen auf Basis von Studien unabhängiger Experten ausgewählt und gewichtet. Die Kapitalanlagen sind so auszurichten, dass sich die zugehörigen Pensionsverpflichtungen im Hinblick auf die gegenwärtigen und zukünftigen Erträge der Anlagen dauerhaft erfüllen lassen. Bei Pensionsverpflichtungen liegen Risiken in der höheren Lebenserwartung von Versorgungsberechtigten sowie in Verpflichtungen, die Rentenhöhen regelmäßig anzupassen. Darüber hinaus können sich die Kosten für Gesundheitsfürsorgeverpflichtungen in den USA und Kanada erhöhen. Außerdem können in einigen Ländern künftig die Zahlungen an Pensionsfonds auf Grund verschärfter gesetzlicher Anforderungen beachtlich steigen. In Einzelfällen kann bei vorzeitiger Auflösung eines Pensionsplans eine zusätzliche Zuführung erforderlich werden. Einzelheiten hierzu finden Sie im Anhang zum Konzernabschluss unter Nr. 15.

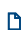

Einzelheiten: Seiten 221–226



### Personalrisiken

Engagierte und kompetente Mitarbeiter und Führungskräfte sind für den Erfolg von ThyssenKrupp von zentraler Bedeutung. Risiken bestehen darin, solche Leistungsträger für offene Stellen nicht zu finden oder kompetente Stelleninhaber zu verlieren. Durch vielfältige personalpolitische Maßnahmen wirken wir diesen Risiken entgegen und positionieren uns als attraktiver Arbeitgeber, der eine langfristige Bindung der Mitarbeiter an den Konzern fördert sowie eine konsequente Managemententwicklung, Karriereperspektiven und attraktive Anreizsysteme für Führungskräfte bietet. Die zielgruppenorientierte Beratung unserer Mitarbeiter bauen wir weiter aus und stärken die Identifikation der Nachwuchskräfte mit dem Unternehmen auf allen Ebenen.

Unser bewährtes Ausbildungssystem wird fortgeführt. Wir informieren interessierte Jugendliche frühzeitig über die Berufschancen bei ThyssenKrupp, um den notwendigen Nachwuchs für unsere Belegschaften sicherzustellen. Die intensive Zusammenarbeit mit Schwerpunktuniversitäten zur frühzeitigen Kontaktaufnahme mit qualifizierten Studenten setzen wir unvermindert fort. Näheres zu diesen Themen können Sie im Kapitel „Mitarbeiter“ auf den Seiten 157–162 lesen.

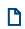

Einzelheiten: Seiten 157–162

### Risiken der künftigen gesamtwirtschaftlichen Entwicklung

Der konjunkturelle Aufschwung der Weltwirtschaft wird sich zwar auch 2011 fortsetzen. Durch den Wegfall zahlreicher Konjunkturprogramme und den Zwang zur Konsolidierung öffentlicher Haushalte könnte sich das Wirtschaftswachstum aber teilweise stärker abschwächen.

Über die Einzelheiten möglicher Risiken aus der konjunkturellen Entwicklung in Deutschland, Europa und den übrigen für ThyssenKrupp wichtigen Handelsregionen und Branchen können Sie sich auf den Seiten 175–178 informieren.

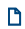

Einzelheiten: Seiten 175–178

### Spezifische Risiken unserer Aktivitäten

#### Steel Europe: Markt- und Beschaffungsrisiken beim Qualitätsflachstahl

Die Business Area Steel Europe sieht grundsätzlich Risiken auf der Absatz- und Beschaffungsseite, aus Wechselkursschwankungen und aus dem Emissionshandel. Im Falle einer Verschlechterung der gesamtwirtschaftlichen Lage steigt das bereits vorhandene Risiko aus Kundeninsolvenzen. Bei zunehmender Nachfrage und Auslastung der Anlagen nimmt das Risiko von Produktionsausfällen zu. Die Kapazitätserweiterungen zur Weiterverarbeitung zusätzlicher Brammen aus dem Stahlwerk der Business Area Steel Americas in Brasilien können zu Marktrisiken auf der Absatz- und Beschaffungsseite führen.

Um Risiken aus einer konjunkturell bedingt schwankenden Nachfrage zu beschränken, optimiert Steel Europe in allen Bereichen die Kosten, passt die Produktion rechtzeitig an und konzentriert sich auf anspruchsvolle Marktsegmente mit möglichst konjunkturunabhängiger Nachfrage. Dem steigenden Risiko aus Kundeninsolvenzen begegnen wir, indem wir das Monitoring intensivieren, alle Möglichkeiten für Warenkreditversicherungen ausschöpfen und die Zahlungsbedingungen anpassen. Qualitäts- und Lieferterminrisiken werden über die stetige Optimierung der Wertschöpfungsketten minimiert.

Die Risiken aus dem intensiven Wettbewerb auf dem Markt für Qualitätsflachstahl minimiert die Business Area weiterhin durch den systematischen Ausbau der Technologiekompetenz, um sich vom Wettbewerb abheben zu können. Dem Risiko steigender Rohstoff- und Energiepreise wird durch alternative Beschaffungsquellen, strukturierte Energiebeschaffung und die Weitergabe der Preiserhöhungen an die Kunden entgegengewirkt.



Steel Europe hat ein sachversicherungsbezogenes wirtschaftliches und technisches Risikocontrolling als festen Bestandteil in den eigenen Risikomanagement-Prozess integriert. Zur weiteren Optimierung des vorbeugenden Brandschutzes werden zusätzliche Investitions- und Instandhaltungsbudgets bereitgestellt. Die Risiken für sonstige Betriebsunterbrechungen werden durch die laufende vorbeugende Instandhaltung, Modernisierung und Investitionen reduziert. Für den Fall einer Betriebsunterbrechung bestehen „Business Continuity Plans“, die Maßnahmen für die Schadenbeseitigung festlegen.

Die Mengen- und Preisrisiken für Emissionsberechtigungen aus dem Emissionshandel der zweiten Handelsperiode, die sich von 2008 bis 2012 erstreckt, hat Steel Europe durch eine konzernweit gültige Emissionshandelsstrategie minimiert. Welche Mengen- und Preisrisiken sich für die Handelsperiode 2013 bis 2020 ergeben, kann verlässlich erst nach der Verabschiedung der Vorgaben durch die Europäische Kommission im 1. Quartal 2011 entschieden werden. Es dürften aber erheblich weniger Zertifikate kostenlos zugeteilt werden, was sie EU-weit verknappen und ihren Preis erhöhen würde.

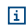

Intensives Controlling und verstärktes Risikomanagement reduzieren unsere Risiken bei Großprojekten.

### Steel Americas: Effizientes Claims Management

Bei dem neuen integrierten Hüttenwerk von ThyssenKrupp CSA Siderúrgica do Atlântico in Rio de Janeiro und dem in Bau befindlichen Weiterverarbeitungswerk in Calvert im US-Bundesstaat Alabama könnte es grundsätzlich zu weiteren Abwicklungsproblemen wie teilweisen Zeitverzögerungen oder unvorhergesehenen Mehrkosten aus der Fertigstellung der Projekte und der Inbetriebnahme der Aggregate kommen. Durch ein intensives Controlling und verstärktes Risikomanagement können wir aber eventuelle Risiken unverzüglich erfassen, bewerten und Gegenmaßnahmen einleiten. Durch ein effizientes Claims Management stellen wir sicher, dass alle Ansprüche und Verpflichtungen unserer Vertragspartner angemessen abgewickelt und gesteuert werden. ThyssenKrupp befindet sich im Zusammenhang mit dem Bau des Stahlwerks und der Kokerei in Brasilien in gerichtlichen, schiedsgerichtlichen und außergerichtlichen Auseinandersetzungen, die zu Schadenersatzleistungen führen können.

Die operativen Risiken, die aus der Inbetriebnahme der Aggregate entstehen können, minimieren wir durch angepasste und aufeinander abgestimmte Hochlaufzeiten, sorgfältige Auswahl und Schulung der neuen Mitarbeiter und gezielten Einsatz von Know-how aus der Produktion der Business Area Steel Europe. Ein frühzeitiger Auf- und Ausbau des Kundenstamms reduziert mögliche Absatzrisiken; außerdem passen wir den Hochlauf der beiden Großprojekte weiterhin der wirtschaftlichen Entwicklung an. Das Beschaffungsrisiko für Eisenerz ist durch langfristige Verträge und die enge Beziehung zu unserem Partner Vale gering.

### Umfangreiche Maßnahmen gegen Marktrisiken bei Stainless Global

Für die Stainless-Aktivitäten, die in der Business Area Stainless Global gebündelt sind, ergeben sich neben den branchenüblichen Risiken auf Grund der zyklischen Stahlkonjunkturverläufe vornehmlich Risiken durch bestehende und weiter wachsende Überkapazitäten bei den Rostfrei-Produzenten in Asien.

Als Gegenmaßnahmen unternehmen wir alle Anstrengungen, die Wertschöpfungskette in Richtung des margenträchtigen Endkundengeschäfts zu verlängern. Außerdem intensiviert Stainless Global die Kundenbeziehungen, baut das kundennahe Serviceangebot aus und verbessert Qualität sowie Lieferleistungen. Hinzu kommen neuentwickelte Anwendungen für rostfreie Stähle und Nickellegierungen, innovative Produkte aus diesen Werkstoffen sowie moderne und kostensparende Prozesstechnologien.

Das weitreichende Maßnahmenprogramm in den Rostfrei-Werken zur Abwehr von Risiken aus künftigen Konjunkturkrisen ist zum großen Teil schon umgesetzt. Hierzu gehören Produktionsanpassungen, geringere Verwaltungskosten sowie weitere Kostensenkungs- und Effizienzsteigerungsmaßnahmen in allen Bereichen.

Der Bau des Edelstahlwerks in Alabama/USA liegt im revidierten Zeitplan. Ein intensives Projektcontrolling sowie detaillierte Risikobewertungen stellen sicher, dass alle Risiken erfasst und kommuniziert werden.



Die Risiken aus Verfügbarkeit und Preisen bei Rohstoffen, insbesondere beim Bezug von Nickel, Chrom und legiertem Schrott, sind durch Verträge und Sicherungsmechanismen minimiert.

#### **Weltweite Präsenz mindert konjunkturelle Risiken bei Materials Services**

Den Risiken aus den Werkstoffdienstleistungen für Kunden in aller Welt wirkt die Business Area Materials Services mit einem breiten Bündel von Maßnahmen entgegen. Das systematisch weiterentwickelte Net-Working-Capital-Management optimiert die Bestände. Konsequente Kostensenkungsmaßnahmen steigern die Effizienz und erhöhen die Wirtschaftlichkeit. Hinzu kommt eine ständig verbesserte Logistik mit leistungsfähigen Steuerungsinstrumenten.

Risiken aus der konjunkturellen Entwicklung vermindern wir durch unsere weltweite Präsenz, eine breite Kundenbasis sowie einen hohen Diversifikationsgrad. Daraus ergibt sich eine erhebliche Risikostreuung, die auch auf Forderungsausfallrisiken zutrifft. Diese werden außerdem durch Absicherungsinstrumente begrenzt.

#### **Stabile Risikosituation bei Elevator Technology**

Die Risikostruktur der Business Area Elevator Technology wird im Wesentlichen von zwei Faktoren bestimmt: den unterschiedlichen Geschäftsaktivitäten sowie den verschiedenen Regionen, in denen die Business Area als internationaler Anbieter tätig ist.

Während das Servicegeschäft von der Konjunktur vergleichsweise unabhängig ist, bestehen im Neuanlagengeschäft, das eng mit dem Bausektor verzahnt ist, stärkere konjunkturelle Risiken. Bei der Abwicklung von Großprojekten nutzen wir gezielte Projektsteuerungsmaßnahmen. Die Risiken durch steigende Materialpreise gleichen wir größtenteils durch Effizienzsteigerungen in der Produktion und einen optimierten Einkauf aus.

Regional gesehen gleicht schon die breite internationale Verteilung der Geschäftsaktivitäten viele Risiken aus, da sich die Märkte, in denen Elevator Technology präsent ist, teilweise in verschiedenen Konjunkturzyklen befinden. Die Wechselkursrisiken sind abgeschwächt, da die Kunden in der Regel zeitnah nach Lieferung und Leistung zahlen. Darüber hinausgehende Wechselkursrisiken aus Geschäften sichern wir systematisch durch finanzwirtschaftliche Instrumente ab.

#### **Projektverschiebungen als Risiko bei Plant Technology**

Auf Grund der verhaltenen Investitionstätigkeit wird sich für Plant Technology der weltweite Preis- und Konditionenwettbewerb verschärfen – vor allem durch asiatische, aber auch europäische Anbieter. Hinzu kommt der Wegfall des Iran-Marktes. Außerdem können kundenseitige Finanzierungsengpässe zu Projektverschiebungen oder -stornierungen führen. Darüber hinaus sind Risiken aus der politischen Entwicklung zu beachten, beispielsweise im Mittleren und Nahen Osten. Wir begegnen diesen Risiken für die Abwicklung von langfristigen Großaufträgen und technisch komplexen Aufträgen durch verstärkte Akquisitionstätigkeit, intensives Projektcontrolling und professionelles Vertragsmanagement. Unsere Standortentwicklung orientieren wir an den Marktanforderungen; Innovationen in den für uns relevanten Technologien intensivieren wir.

#### **Marktrisiken im Geschäft von Components Technology**

Die Business Area Components Technology ist auf Grund ihrer weltweiten Aktivitäten auf unterschiedlichen Geschäftsfeldern diversen allgemeinen Risiken ausgesetzt.

Nach wie vor besteht das Risiko eines erneuten weltweiten oder regional begrenzten Nachfrageeinbruchs. Um nicht von Teilmärkten abhängig zu sein, weitet die Business Area die Kundenbasis aus und verstärkt die internationale Präsenz, insbesondere in Asien.

**1**

Die breite internationale Verteilung des Elevator-Geschäfts gleicht Risiken regionaler Konjunkturzyklen aus.



Im Windenergiesektor bestehen trotz langfristig starker Wachstumsperspektiven Risiken, dass Aufträge infolge zurückhaltender Kapitalgeber verschoben oder annulliert werden. Gleichzeitig nimmt der Preiswettbewerb angesichts der bestehenden Kapazitäten zu. Dem auch im Automotive-Bereich zunehmenden Preisdruck begegnet die Business Area mit umfangreichen Maßnahmenprogrammen zur Kostensenkung und Produktivitätssteigerung.

Neben den Risiken auf der Absatzseite besteht ein erhebliches Risiko auf der Beschaffungsseite aus stark steigenden Vormaterialpreisen, die sich nicht in vollem Umfang oder nur zeitverzögert an die Kunden weitergeben lassen. Durch entsprechende Gestaltung der Kundenverträge wirken wir diesem Risiko entgegen.

Weitere Risiken der Business Area betreffen die Auswirkungen von veränderten Wechselkursrelationen auf Umsatz und Ergebnis. Darüber hinaus sind im Hinblick auf laufende technologische Neu- und Weiterentwicklungen Risiken mit ungeplanten Ergebnisbelastungen nicht auszuschließen. Hinzu kommen mögliche Risiken aus unerwarteten Ausbringungs- und Qualitätsproblemen sowie den sich hieraus ergebenden Gewährleistungsverpflichtungen. Um derartige Risiken weitgehend zu vermeiden bzw. zu begrenzen, werden umfangreiche Produktions- und Qualitätssicherungssysteme genutzt.

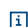

Die fortschreitende Restrukturierung von Marine Systems hat das Risikopotenzial der Business Area reduziert.

### Weniger Risiken bei Marine Systems

Durch die umfangreichen Maßnahmen zur Restrukturierung der Business Area Marine Systems hat sich auch das verbleibende Risikoportfolio erheblich reduziert.

Die im Zusammenhang mit der Trennung von der Mehrheit an Hellenic Shipyards identifizierten Risiken aus dem EU-Beihilfeverfahren sowie aus der im Geschäftsjahr 2008/2009 erfolgten Kündigung der U-Bootverträge mit der griechischen Regierung können durch das Ausscheiden von HSY aus dem Konsolidierungskreis als erledigt angesehen werden.

Weitere materielle Risiken waren der Auftragsabwicklung der drei parallel in Abarbeitung befindlichen Yachten „Eclipse“, „Nahlin“ und „Orca“ zugeordnet. Die „Nahlin“ wurde im Sommer 2010 abgeliefert, die „Orca“ konnte ebenfalls abgeliefert werden, während die „Eclipse“ zur Ablieferung bereitgestellt wurde.

Schließlich ergaben sich materielle Risiken aus der Auslastungssituation im Yachtbau für die Werft Blohm + Voss Shipyards in Hamburg, die mit Wirksamwerden der Verträge mit Abu Dhabi MAR gelöst sein werden. In begrenztem Umfang bleibt jedoch auch im verbleibenden Marinegeschäft ein Auslastungsrisiko bestehen, insbesondere dann, wenn erwartete Auftragseingänge sich deutlich verschieben. Dem begegnen wir durch eine Kapazitätssteuerung unter Einbindung qualifizierter Unterauftragnehmer und, soweit wirtschaftlich sinnvoll, durch standortübergreifende Koordination.

## Bestand des Konzerns gesichert

Die Gesamtrisikosituation bei ThyssenKrupp ist weiterhin überschaubar. Es liegen keine bestandsgefährdenden Risiken vor. Unser kontinuierliches Risikomanagement und die effiziente und maßgeschneiderte Steuerung aller Risikokategorien in unseren Geschäftsaktivitäten tragen zur Risikobegrenzung im Konzern bei.



# Nachtrags-, Chancen- und Prognosebericht

Der konjunkturelle Aufschwung wird sich 2011 voraussichtlich weiter fortsetzen, allerdings mit einem niedrigeren Tempo. ThyssenKrupp erwartet für das Geschäftsjahr 2010/2011 eine weitere Steigerung des Umsatzes von etwa 10 % bis 15 %. Das Bereinigte EBIT soll im Verhältnis zum Umsatz überproportional wachsen und um 2 Mrd € liegen.

## Besondere Ereignisse nach Bilanzstichtag

Berichtspflichtige Ereignisse lagen nicht vor.

## Konjunkturausblick

[1]

2011 soll die Weltwirtschaft um 3,8 % wachsen.

### Aufschwung der Weltwirtschaft setzt sich 2011 verlangsamt fort

Der konjunkturelle Aufschwung der Weltwirtschaft wird sich auch 2011 fortsetzen. Durch den Wegfall zahlreicher Konjunkturprogramme und den Zwang zur Konsolidierung öffentlicher Haushalte wird das Welt-Wirtschaftswachstum 2011 mit einem Plus von 3,8 % aber schwächer ausfallen als im Jahr zuvor. Risiken für die weitere konjunkturelle Entwicklung gehen von einer möglichen stärkeren Abkühlung der US-Wirtschaft, der Wechselkursentwicklung, der Schuldenkrise in vielen Ländern, dem nach wie vor hohen Abschreibungsbedarf der Banken sowie von der Preisentwicklung bei Rohstoffen aus.

In den USA wird sich das Wirtschaftswachstum 2011 wieder verlangsamen. Insbesondere die auf Grund der weiterhin labilen Entwicklung des Arbeits- und Immobilienmarktes gedämpften Konsumperspektiven lassen nur einen moderaten Zuwachs erwarten. Auch in Japan haben sich die Wachstumsperspektiven für 2011 auf Grund des starken Yen und der Abschwächung in wichtigen Ausfuhrländern eingetrübt.

Im Euroraum wird sich das Wachstumstempo 2011 insgesamt kaum verändern. Allerdings wird der Aufschwung der deutschen Wirtschaft an Elan verlieren. Das ist insbesondere auf die nachlassende Exportdynamik und die Konsolidierungsanstrengungen der öffentlichen Haushalte zurückzuführen. Einen wieder größeren Wachstumsbeitrag wird angesichts der positiven Arbeitsmarktentwicklung der private Verbrauch beisteuern.



**BRUTTOINLANDSPRODUKT 2011\* reale Veränderung zum Vorjahr in %**
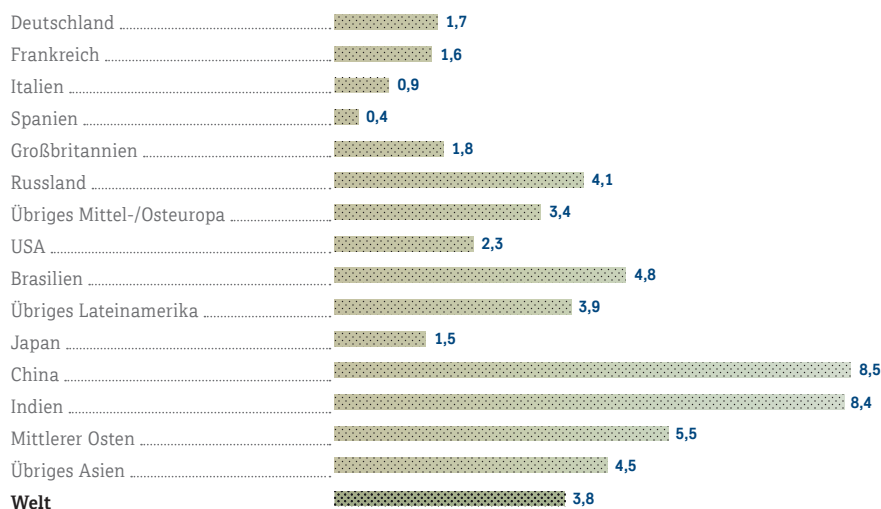

\* Schätzung

Weiterhin vergleichsweise günstig bleiben die gesamtwirtschaftlichen Aussichten der großen Schwellenländer. Brasilien profitiert von einer soliden Binnennachfrage und den hohen Rohstoffpreisen, allerdings wird das Wirtschaftswachstum 2011 insbesondere durch die Abschwächung bei wichtigen Handelspartnern etwas niedriger ausfallen. Auch Russland kommen steigende Rohstoffexporte zu Gute, eine höhere Konjunkturdynamik wird aber durch strukturelle Defizite im Land begrenzt. In China werden sich die hohen Zuwachsraten auf Grund der restriktiveren Geld- und Finanzpolitik geringfügig zurückbilden, während sich in Indien die hohe Wachstumsdynamik in nahezu unverminderter Stärke fortsetzt.

Hohe Unsicherheiten gehen von der weiteren Entwicklung auf den Rohstoffmärkten aus. Seitdem es den drei großen Eisenerzproduzenten in der 1. Jahreshälfte 2010 gelungen ist, die Verträge mit den Stahlunternehmen von Jahres- auf Quartalsbasis umzustellen, wird der Preis für Erze in jedem Quartal am volatilen Spotmarkt ausgerichtet. Dies kann zu erheblichen, von der allgemeinen Konjunktur- und Branchenentwicklung abgekoppelten Preisausschlägen führen.

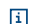

Für 2011 erwarten wir eine weitere leichte Verbesserung auf unseren wesentlichen Absatzmärkten.

**Perspektiven in bedeutenden Absatzmärkten**

Vor dem Hintergrund der prognostizierten gesamtwirtschaftlichen Entwicklung wird sich die Lage auf unseren bedeutenden Absatzmärkten überwiegend leicht verbessern, wenn auch mit abgeschwächter Dynamik. Wir gehen im Einzelnen von folgenden Entwicklungen aus:

- Der Weltstahlmarkt bleibt 2011 aufwärts gerichtet. In Europa und im Nafta-Raum wird die Stahlmarktversorgung weiter zunehmen, wenn auch moderater. Nachdem 2010 das Nachfragewachstum in diesen Märkten im Wesentlichen lagerzyklisch bedingt war, dürfte 2011 der reale Verbrauch wieder eine größere Rolle spielen; die in den Vorkrisenjahren 2007 und 2008 erreichten Stahlmarktvolumina werden allerdings bei Weitem noch unterschritten. In den Schwellenländern setzt sich das Stahlverbrauchswachstum ebenfalls fort. China bleibt der wichtigste Treiber des globalen Stahlmarktes, selbst wenn die sehr hohen zweistelligen Wachstumsraten der Jahre 2009 und 2010 voraussichtlich nicht fortgeschrieben werden. Da auch vor dem Hintergrund des anhaltenden Kapazitätsaufbaus in China die dortige Produktion weiter expandieren wird, dürfte sich die Lage auf den Rohstoffmärkten vorerst nicht wesentlich entspannen. Die Kosten für die Einsatzstoffe in der Stahlerzeugung bleiben daher voraussichtlich hoch. Die globale Walzstahlmarktversorgung wird 2011 etwa um 5 % auf 1,34 Mrd t steigen; dies entspräche einer Rohstahlproduktion von 1,45 Mrd t. Für Deutschland wird eine um 5 % höhere Stahlnachfrage erwartet.



- Die Nachfrage nach rost-, säure- und hitzebeständigen Edelstahlflachprodukten wird sich weiter erholen. Nachdem 2010 die weltweite Nachfrage im Nachgang zur Krise um 16 % gestiegen ist, wird sich 2011 das Wachstum auf voraussichtlich 8 % normalisieren. Für den westeuropäischen und nordamerikanischen Markt wird eine Zunahme von 10 % bzw. 14 % erwartet. In China dürfte die Nachfrage um 7 % zulegen, während für den übrigen asiatischen Raum mit einem Plus von 6 % gerechnet wird. Auch bei den Hochleistungswerkstoffen Nickellegierungen und Titan dürfte der Bedarf zunehmen.

#### PROGNOSEN ZUR ENTWICKLUNG IN WICHTIGEN ABSATZMÄRKTEN

|                                                                 | 2010   | 2011   |
|-----------------------------------------------------------------|--------|--------|
| <b>Marktversorgung Walzstahl, in Mio t</b>                      |        |        |
| Welt                                                            | 1.272  | 1.340  |
| Deutschland                                                     | 35     | 37     |
| USA                                                             | 79     | 86     |
| China                                                           | 579    | 599    |
| <b>Marktversorgung Edelstahl Flach, in 1.000 t</b>              |        |        |
| Welt                                                            | 15.902 | 17.110 |
| Deutschland                                                     | 932    | 1.025  |
| USA                                                             | 948    | 1.066  |
| China                                                           | 5.932  | 6.342  |
| <b>Fahrzeugproduktion, in Mio PKW und leichte Nutzfahrzeuge</b> |        |        |
| Welt                                                            | 67,8   | 72,6   |
| Westeuropa                                                      | 14,2   | 14,9   |
| Deutschland                                                     | 5,7    | 5,8    |
| USA                                                             | 7,4    | 8,4    |
| Japan                                                           | 9,1    | 9,5    |
| China                                                           | 15,1   | 15,6   |
| Brasilien                                                       | 3,3    | 3,6    |
| <b>Maschinenbauproduktion, real, in % gegenüber Vorjahr</b>     |        |        |
| Deutschland                                                     | 6,0    | 10,0   |
| USA                                                             | 9,0    | 8,0    |
| Japan                                                           | 16,0   | 10,0   |
| China                                                           | 19,5   | 14,0   |
| <b>Bauproduktion, real, in % gegenüber Vorjahr</b>              |        |        |
| Deutschland                                                     | - 0,5  | - 1,0  |
| USA                                                             | - 13,1 | 8,4    |
| China                                                           | 11,9   | 8,6    |

- Der internationale Fahrzeugmarkt wird sich weiter erholen. Wir erwarten für 2011 einen Produktionszuwachs von 7 % auf weltweit 72,6 Mio Personen- und leichte Nutzfahrzeuge. In China wird sich die zuvor sehr hohe Wachstumsdynamik spürbar abschwächen; 2011 wird lediglich mit einem Produktionsplus von 3 % gerechnet. Stärker bleibt das Wachstum in den USA und Japan. Mit Zuwachsraten von 13 % bzw. 4 % können diese Länder die zuvor erlittenen Einbrüche teilweise wettmachen. In Westeuropa wird die Fahrzeugproduktion voraussichtlich um 5 % zunehmen. Die Hersteller in Deutschland werden dabei das gute Vorjahresergebnis nur noch leicht steigern, während für die anderen, bisher schwachen Märkte Frankreich, Spanien und Großbritannien wieder spürbare Zuwächse erwartet werden.

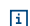

Der internationale Maschinenbau soll 2011 stärker als im Vorjahr wachsen.

- Der internationale Maschinenbau wächst 2011 etwas stärker als im Jahr zuvor. Dafür spricht die sich bessernde Nachfrage nach Investitionsgütern und Anlagen. In China ist mit einem Produktionsanstieg von 14 % zu rechnen. Die USA und Japan dürften Zuwächse von 8 % bzw. 10 % aufweisen. Auf Grund der verbesserten Auftragslage und höherer Auftragsbestände wird auch der deutsche Maschinenbau die Produktion voraussichtlich um 10 % ausweiten.



- Die Baukonjunktur bleibt auch 2011 regional gespalten. Deutschland sowie die meisten west-europäischen Länder werden über eine Stagnation kaum hinauskommen; lediglich in Mittel- und Osteuropa ist mit einem moderaten Wachstum der Bauproduktion zu rechnen. Die Bauwirtschaft in den USA wird sich nach den tiefen Einbrüchen in den Vorjahren erholen. In China und Indien bleibt die Baukonjunktur kräftig.

## Chancenbericht

Hohe Produktqualität, anspruchsvolle Innovationen und die ständig verbesserte Produktivität unserer Werke eröffnen ThyssenKrupp gute Wachstumschancen im internationalen Geschäft. Unsere Erzeugnisse erfüllen hohe Leistungsstandards, mit denen sich unsere Business Areas strategisch als Premiumanbieter positionieren. Aus der anhaltenden Erholung der weltwirtschaftlichen Lage besitzt ThyssenKrupp in allen Business Areas weitere Chancen, die allerdings durch die Möglichkeit eines konjunkturellen Rückschlags gefährdet sind. Wie wir die künftige Konjunktur im Einzelnen einschätzen, ist detailliert auf den Seiten 175–178 erläutert.

Die Risiken für den Konzern im Rahmen seiner wirtschaftlichen Tätigkeit sind im Risikobericht auf den Seiten 163–174 dargestellt.

### Chancenmanagement weiterentwickelt

Im abgelaufenen Geschäftsjahr haben wir unser Chancenmanagementsystem stärker in die Standard-berichterstattung integriert und auf diese Weise weiterentwickelt. Jede Business Area berichtet monatlich über ergebnisrelevante Chancen. Diese Managementeinschätzungen werden in monatlichen Meetings strukturiert und bewertet. Im Rahmen des Planungsprozesses haben wir darüber hinaus das Instrument der SWOT-Analyse weiterentwickelt und strategische Chancen für unsere einzelnen Geschäftsmodelle identifiziert. Mit dem SWOT-Analyseverfahren lassen sich speziell Stärken und Schwächen bzw. Chancen und Risiken untersuchen.

Chancenmanagement ist bei uns Teamarbeit. Projektverantwortliche mit Marktverantwortung, Geschäftsführungen, Bereichsvorstände und der Vorstand der ThyssenKrupp AG spüren gemeinsam aussichtsreiche Marktänderungen und Technikrends auf und erschließen sie für den Konzern.

### Strategische Chancen für den Konzern

Wir wollen unsere Geschäfte konsequent weiter internationalisieren, um stärker auf den Wachstumsmärkten präsent zu sein. Der Ausbau unserer Aktivitäten insbesondere in Asien – mit Schwerpunkten in China und Indien – kann neue Geschäftschancen eröffnen. In Amerika können wir durch die neuen Werke der Business Area Steel Americas den Stahlmarkt intensiver bearbeiten. Diese Chancen werden in den nächsten Jahren auch für das neue Edelstahlwerk wachsen.

Über unsere Unternehmensstrategie informieren wir Sie eingehend auf den Seiten 91-99.

### Organisatorische Chancen durch erfolgreiche Neuorganisation

Die zum Beginn des Berichtsjahres umgesetzte Neuorganisation des Konzerns hat uns neue geschäftliche Chancen eröffnet. Die beiden Divisions Materials und Technologies als virtuelle Klammern für jeweils vier Business Areas mit verwandten Geschäften ermöglichen vielfältige Synergien, die von gemeinsamer Marktbearbeitung bis zu optimierter Logistik reichen. Wir werden deshalb die Organisationsstruktur zukunftsorientiert weiterentwickeln, um Strukturen und Abläufe weiter zu verbessern.

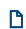

Einzelheiten: Seiten 175–178

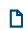

Einzelheiten: Seiten 163–174

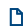

Einzelheiten: Seiten 91–99



### Operative Chancen der Business Areas

Auf ihren Märkten verfügen unsere Business Areas über vielfältige operative Chancen.

**Steel Europe:** Für die Business Area Steel Europe bieten vor allem die Trends zur Urbanisierung und zu steigender Mobilität, aber auch der Aufbau und die Modernisierung der Energieinfrastruktur Aussichten für den Einsatz anspruchsvoller Stahlprodukte, beispielsweise unserer Elektrobandqualitäten. Allen voran die Automobilwirtschaft und der Maschinenbau – aus diesen Bereichen stammen viele unserer Kunden – kaufen international wieder verstärkt Stahl. Die Nachfragebelebung betrifft in erster Linie die Schwellenländer, im Wesentlichen China; den Wachstumstrend dort schätzen wir langfristig als intakt ein.

4

Steel Americas will den Anteil am Nafta-Markt für Flachstahl auf über 5 % ausbauen.

**Steel Americas:** Mit ihren neuen Stahl- und Weiterverarbeitungswerken in Brasilien und den USA will die Business Area attraktive Margen realisieren und den Anteil am Nafta-Markt für Flachstahl mittelfristig auf über 5 % erhöhen. Zusätzliche Chancen bietet die Zusammenarbeit mit Steel Europe. Sie reichen vom Rohstoffeinkauf über die gemeinsame Optimierung der weltweiten Brammendisposition und -logistik und den Austausch von Technologien bis zur gemeinsamen Marktbearbeitung bei globalen Schlüsselkunden.

**Stainless Global:** Die Internationalisierung des Stainless-Geschäfts sowie neue Einsatzfelder für rostfreien Edelstahl bestimmen die Chancen der Business Area Stainless Global. Dies gilt auch für unsere Hochleistungswerkstoffe wie Nickel und Titanlegierungen. Konstrukteure setzen sie verstärkt für Bauteile und Komponenten ein, die extrem korrosionsbeständig und belastbar sein müssen.

**Materials Services:** Im Zuge der weiteren Fokussierung der Produzenten und Verarbeiter auf ihre Kernaufgaben werden Dienstleistungen von Materials Services weiter an Bedeutung gewinnen. Unsere Vorteile sind gelebte Kundenorientierung, spezielles Markt- und Branchenwissen, weltweite Verbindungen sowie unser Know-how im Projektmanagement.

**Elevator Technology:** Für Elevator Technology bieten neue Aufzüge wie das TWIN-System und moderne Design-Lösungen Chancen im attraktiven Hochhaussegment, da dort schnelle und leistungsstarke Transportlösungen verlangt werden. Auch unser Wartungsgeschäft wächst: Immer mehr Kunden schätzen unsere technisch hochqualifizierten und termingenauen Dienstleistungen.

**Plant Technology:** Gerade in den Schwellenländern eröffnen sich gute Marktchancen für kosteneffiziente und umweltfreundliche Anlagen des Spezial- und Großanlagenbaus von Plant Technology. Ein Beispiel ist das thermische und stoffliche Recycling von Abfällen bei der Zementherstellung, wodurch sich Kosten und Emissionen stark senken lassen. Hinzu kommen Anlagen für die chemische Industrie.

**Components Technology:** Speziell vom wachsenden Umweltbewusstsein der Autofahrer kann das Geschäft von Components Technology mit Automobilkomponenten profitieren: Unsere Komponenten für emissionsarme Motoren sowie gewichtsoptimierten Komponenten machen einen niedrigeren CO<sub>2</sub>-Ausstoß der Fahrzeuge möglich.

**Marine Systems:** Im Marinebereich liegen unsere Chancen in einem stärkeren Exportgeschäft. Hierfür kommt der Zusammenarbeit mit dem neuen strategischen Partner Abu Dhabi MAR besondere Bedeutung zu, da in der Region Middle East/North Africa Beschaffungsvorhaben zur Entscheidung anstehen.



### Leistungswirtschaftliche Chancen für höhere Rentabilität

Neben dem zunehmenden Einsatz intelligenter Beschaffungssysteme wie einer Ausschreibungsplattform und dem Katalogbestellsystem erschließen neue Produktionsverfahren zusätzliche Rationalisierungs- und Qualitätsreserven. Gerade im Stahlbereich sind neue Fertigungsverfahren für innovative Stahlqualitäten hinzugekommen – beispielsweise unser patentiertes Tailored-Tempering-Verfahren. Im Aufzugbau werden wir künftig noch stärker als bisher für unterschiedliche Aufzugmodelle gleichartige Komponenten nutzen. Im Marketing wollen wir die Beziehungen zu unseren Kunden weiter intensivieren; unser weltweites Niederlassungsnetz wird dafür ständig optimiert.

### Wertsteigerungspotenzial durch Konzerninitiativen

Die erfolgreiche Konzerninitiative ThyssenKrupp best wird auch künftig die Effizienz des Konzerns steigern und die Kosten senken. Zusammen mit bereichsspezifischen Programmen wird dies zum nachhaltigen Erfolg des Konzerns beitragen.

## Erwartete Ertragslage

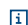

Unser Ausblick auf 2010/2011 ist vorsichtig optimistisch.

Mit Blick auf das Geschäftsjahr 2010/2011 bleiben wir hinsichtlich der Entwicklung in unseren Kernmärkten und Hauptabsatzbranchen weiter vorsichtig optimistisch.

Unser Fokus liegt unverändert auf der strukturellen Optimierung des Unternehmens, was auch weitere gezielte Veräußerungen aus dem Konzernportfolio einschließt. Daneben konzentrieren wir uns auf den effizienten Hochlauf unserer neuen Stahl- und Weiterverarbeitungswerke sowie den damit verbundenen Markteintritt in den USA.

**Umsatz und Ergebnis:** Für den Konzern erwarten wir im Geschäftsjahr 2010/2011 eine weitere Steigerung des Umsatzes um 10 % bis 15 % (2009/2010: 42,6 Mrd €). Für das Konzernergebnis gehen wir von einer im Verhältnis zum Umsatz überproportionalen Steigerung aus. Diese Entwicklung folgt weiteren operativen Verbesserungen und der Erholung unserer Absatzmärkte, die die Ergebnisbelastung durch die Business Area Steel Americas mehr als kompensieren.

Das Bereinigte Ergebnis vor Steuern und Zinsen (um Sondereinflüsse bereinigtes EBIT) wird voraussichtlich um 2 Mrd € liegen (2009/2010: 1,2 Mrd €). Der Vergleichswert des Vorjahres basiert – ebenso wie der Ausblick für das Geschäftsjahr 2010/2011 – auf der angepassten Definition des EBIT, die auf Seite 96 dieses Geschäftsberichts erläutert wird.

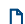

Einzelheiten: Seite 96

Die Erwartungen für die einzelnen Business Areas sind wie folgt:

- Steel Europe – Weiterhin gute Auslastung; Verbesserung der Versandmengen und der Durchschnittserlöse
- Steel Americas – Negatives EBIT im mittleren dreistelligen Millionen-Euro-Bereich, das sich im Wesentlichen aus höheren Abschreibungen sowie Anlaufverlusten für die neuen Werke ergibt und sich mit fortschreitendem Hochlauf der Anlagen verbessern wird
- Stainless Global – Verbesserung der Mengen und Basispreise
- Materials Services – Verbesserung der Mengen und Erlöse
- Elevator Technology – Weiterhin hoher Ergebnisbeitrag dank des guten Auftragsbestands sowie des stabilen Wartungsgeschäfts



- Plant Technology – Stabile Umsatz- und Ergebnisentwicklung aus dem hohen Auftragsbestand im Projektgeschäft; steigender Auftragseingang
- Components Technology – Steigerung von Umsatz und Ergebnis bei Komponenten für die Automobilindustrie, den Bausektor und den Maschinenbau
- Marine Systems – Positiver Ergebnisbeitrag aus verbleibendem Geschäft mit U-Booten und Marine-Überwasserschiffen

Im Geschäftsjahr 2011/2012 werden wir unsere Anstrengungen zur strukturellen Verbesserung des Konzerns weiter fortsetzen. Hierzu gehören Maßnahmen für nachhaltige Kostensenkungen als auch weitere gezielte Anpassungen unseres Portfolios. Zusätzliche positive Einflüsse auf die Ergebnisentwicklung des Konzerns sollten sich aus gesteigerten Versandmengen bzw. der zunehmenden Fixkostendegression in der Business Area Steel Americas ergeben. Daneben streben wir eine Reduzierung unserer Netto-Finanzschulden an.

**Dividende:** Im Rahmen der von uns verfolgten Dividendenkontinuität werden wir weiterhin eine angemessene Dividende ausschütten.

**Mitarbeiter:** Nach jetziger Planung werden wir zum 30. September 2011 rund 176.200 Mitarbeiter beschäftigen; dies bedeutet eine Abnahme um 0,7 %. Im darauffolgenden Geschäftsjahr kann die Zahl der Arbeitsplätze aber um 1,5 % steigen. Eventuelle Portfolioveränderungen einerseits und der Hochlauf der neuen Werke in Brasilien und den USA andererseits werden die Belegschaftsentwicklung prägen. So entstehen neue Arbeitsplätze vornehmlich im Ausland, da unser Konzern im Zuge der Internationalisierung immer mehr Fertigungen und Service-Stützpunkte in der Nähe zu seinen Kunden aufbaut.

Unser Ausbildungsangebot für Jugendliche wird auf dem gewohnt hohen Stand bleiben. Wir wollen auch in den kommenden Jahren über unseren eigenen Bedarf hinaus ausbilden, um möglichst vielen Jugendlichen die Chance zu einem Start ins Berufsleben zu geben. Insgesamt wird der Personalaufwand des Konzerns 2010/2011 weiterhin unter 10 Mrd € liegen; dies erwarten wir auch für das darauffolgende Geschäftsjahr.

**Innovationen:** Wir planen, die Innovationsaufwendungen im neuen Geschäftsjahr um 3 % bis 4 % gegenüber dem Vorjahr zu erhöhen. Dies wird stark durch kundenbezogene Entwicklungsprojekte sowie durch eine Vielzahl intern initiierten Forschungsaktivitäten getrieben. Mit einem gezielten Ausbau unserer Entwicklungsaktivitäten in den nächsten Jahren führen wir unsere kundenorientierte Innovationsarbeit weiter und schaffen so die Basis für den zukünftigen Unternehmenserfolg.

Für die anstehenden anspruchsvollen Aufgaben im neuen Geschäftsjahr bauen wir weiterhin auf unser hochqualifiziertes Personal, das Innovationen insbesondere in den ThyssenKrupp Leittrends Werkstoffe, Energietechnik, Umwelt & Ressourcen und Mobilität vorantreibt. Die Aktivitäten werden durch das ThyssenKrupp House of Innovation flankiert.

**Beschaffung:** Der Materialaufwand wird sich auch 2010/2011 weitgehend parallel zum Umsatz entwickeln. Sein Anteil am Umsatz dürfte rund 65 % ausmachen. Wir gehen davon aus, dass es dank langfristiger Lieferantenbeziehungen und unseres international operierenden Einkaufs zu keinen Versorgungsengpässen kommen wird. Dies gilt für Roh-, Hilfs- und Betriebsstoffe ebenso wie für Anlagen, Komponenten oder Dienstleistungen.

**i**

Der Personalaufwand des Konzerns wird 2010/2011 wieder unter 10 Mrd € liegen.



Auch im nachfolgenden Jahr werden wir den Einkauf weiterentwickeln. Unsere konzernweite Einkaufsinitiative wird fortgeführt. Außerdem wollen wir das System für Einkaufsreporting und -controlling weltweit weiter ausbauen, um Einkaufsaspekte und -prozesse transparenter zu machen und besser zu steuern.

**Energie:** Die Energieversorgung unserer Werke ist weltweit sichergestellt. Wir rechnen mit keinen Versorgungsengpässen. Bei einem Anziehen der Konjunktur sind allerdings steigende Preise für alle Energieträger zu erwarten. Unsere bereits beschafften Strom- und Erdgasmengen sichern aber den erwarteten Strom- und Erdgasbedarf in Deutschland in den Geschäftsjahren bis 2012/2013 zu einem hohen Grad ab, so dass für einen solchen Fall vorgesorgt ist. Für die danach folgenden Jahre haben wir teilweise auch schon Strom zu günstigen Preisen gekauft.

Aus dem EU-Emissionshandel in der dritten Handelsperiode, die sich von 2013 bis 2020 erstreckt, werden uns auf Basis der uns bekannten Gesetzentwürfe vermutlich hohe Kosten für Emissionsberechnungen erwachsen.

**Umweltschutz:** Wir werden im neuen Geschäftsjahr unsere interne Umwelt- und Klimaschutzorganisation weiterentwickeln. Nur ein stabiles Netzwerk aus Experten rund um den Globus und ein jederzeit schneller Zugang zu benötigten Informationen können den hohen Stand des Umweltschutzes in den Werken und Niederlassungen des Konzerns international sichern. Dabei wollen wir insbesondere Daten und Erkenntnisse zu Treibhausgas-Emissionen gewinnen und auswerten.

Für den laufenden Umweltschutz werden wir nach jetziger Planung 2010/2011 über 600 Mio € aufwenden. Im darauffolgenden Geschäftsjahr dürften die Kosten höher liegen. Der größte Teil entfällt auf die Luft- und Wasserreinhaltung. Im Mittelpunkt der Investitionen für Umweltschutzanlagen stehen weiterhin die Werke und Projekte in Brasilien und den USA. Um Treibhausgas-Emissionen zu vermeiden und die natürlichen Ressourcen zu schonen, werden alle Business Areas noch stärker als bisher Energie einsparen und Reststoffe verwerten.

## Erwartete Finanz- und Liquiditätslage

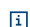

Finanzierung und Liquidität des Konzerns sind auch 2010/2011 gesichert.

Trotz der Nachwirkungen der Finanzkrise und der damit zusammenhängenden immer noch erschwerten Rahmenbedingungen stehen Finanzierung und Liquidität des Konzerns auch im Geschäftsjahr 2010/2011 auf einer gesicherten Basis. Dabei ist berücksichtigt, dass die Entwicklung der Netto-Finanzschulden unterjährig deutlichen Schwankungen unterliegt. Auf Grund des Fortschritts von Großprojekten wie dem neuen Stahlwerk in Brasilien, dem neuen Produktions- und Vertriebsstandort in den USA sowie der Kapazitätsoptimierung am Standort Duisburg liegt das Investitionsniveau 2010/2011 unter dem der Vorjahre. Im Zuge der weiteren Fertigstellung der Großprojekte wird sich diese Entwicklung auch 2011/2012 fortsetzen.



# Konzernabschluss

# 03

S. 183–280

Der nachfolgende Konzernabschluss der ThyssenKrupp AG für das Geschäftsjahr 2009/2010 bietet umfassenden Überblick über die Vermögens-, Finanz- und Ertragslage des Konzerns. Sie finden darin eine Vielzahl von Detailinformationen über die Entwicklung unseres Geschäfts im Berichtsjahr. Der Abschlussprüfer – die KPMG AG Wirtschaftsprüfungsgesellschaft – hat den Konzernabschluss sowie den Konzernlagebericht geprüft und einen uneingeschränkten Bestätigungsvermerk erteilt.

## Inhalt

|       |                                                                                         |       |                                                                           |
|-------|-----------------------------------------------------------------------------------------|-------|---------------------------------------------------------------------------|
| 187   | Konzern-Bilanz                                                                          | 249   | Erläuterungen zur Konzern-Gewinn- und Verlustrechnung                     |
| 188   | Konzern-Gewinn- und Verlustrechnung                                                     | Nr 26 | Umsatzerlöse, 249                                                         |
| 189   | Konzern-Gesamtergebnisrechnung                                                          | Nr 27 | Sonstige betriebliche Erträge, 249                                        |
| 190   | Konzern-Eigenkapitalveränderungsrechnung                                                | Nr 28 | Sonstige betriebliche Aufwendungen, 249                                   |
| 191   | Konzern-Kapitalflussrechnung                                                            | Nr 29 | Zuwendungen der öffentlichen Hand, 249                                    |
| 192   | Konzern-Anhang                                                                          | Nr 30 | Finanzergebnis, 249                                                       |
| Nr 01 | Grundsätze der Rechnungslegung, 192                                                     | Nr 31 | Steuern vom Einkommen und vom Ertrag, 250                                 |
| Nr 02 | Erwerbe und Veräußerungen, 204                                                          | Nr 32 | Ergebnis je Aktie, 252                                                    |
| Nr 03 | Disposal Groups und einzelne zur Veräußerung vorgesehene Vermögenswerte, 206            | Nr 33 | Zusätzliche Angaben zur Konzern-Gewinn- und Verlustrechnung, 252          |
| 209   | Erläuterungen zur Konzern-Bilanz                                                        | 253   | Erläuterungen zur Konzern-Kapitalflussrechnung                            |
| Nr 04 | Immaterielle Vermögenswerte, 209                                                        | Nr 34 | Zusätzliche Informationen zur Kapitalflussrechnung, 253                   |
| Nr 05 | Sachanlagen, 213                                                                        | 253   | Sonstige Angaben                                                          |
| Nr 06 | Als Finanzinvestition gehaltene Immobilien, 215                                         | Nr 35 | Erklärungen zum Deutschen Corporate Governance Kodex nach § 161 AktG, 253 |
| Nr 07 | Nach der Equity-Methode bilanzierte Beteiligungen, 215                                  | Nr 36 | Inanspruchnahme von Befreiungsvorschriften, 254                           |
| Nr 08 | Vermietete Gegenstände (Operating Lease), 216                                           | Nr 37 | Aufstellung des Anteilsbesitzes, 256                                      |
| Nr 09 | Vorräte, 216                                                                            |       |                                                                           |
| Nr 10 | Forderungen aus Lieferungen und Leistungen, 216                                         | 279   | Bestätigungsvermerk des Abschlussprüfers                                  |
| Nr 11 | Sonstige finanzielle Vermögenswerte, 217                                                | 280   | Versicherung der gesetzlichen Vertreter                                   |
| Nr 12 | Sonstige nicht finanzielle Vermögenswerte, 218                                          |       |                                                                           |
| Nr 13 | Eigenkapital, 218                                                                       |       |                                                                           |
| Nr 14 | Aktienbasierte Vergütung, 220                                                           |       |                                                                           |
| Nr 15 | Rückstellungen für Pensionen und ähnliche Verpflichtungen, 221                          |       |                                                                           |
| Nr 16 | Sonstige Rückstellungen, 227                                                            |       |                                                                           |
| Nr 17 | Finanzschulden, 228                                                                     |       |                                                                           |
| Nr 18 | Verbindlichkeiten aus Lieferungen und Leistungen, 229                                   |       |                                                                           |
| Nr 19 | Sonstige finanzielle Verbindlichkeiten, 230                                             |       |                                                                           |
| Nr 20 | Sonstige nicht finanzielle Verbindlichkeiten, 230                                       |       |                                                                           |
| Nr 21 | Eventualverbindlichkeiten, sonstige finanzielle Verpflichtungen und andere Risiken, 231 |       |                                                                           |
| Nr 22 | Finanzinstrumente, 233                                                                  |       |                                                                           |
| Nr 23 | Beziehungen zu nahe stehenden Unternehmen und Personen (related parties), 242           |       |                                                                           |
| Nr 24 | Segmentberichterstattung, 243                                                           |       |                                                                           |
| Nr 25 | Schätzungen und Ermessensausübungen im Rahmen der Rechnungslegung, 247                  |       |                                                                           |



## ThyssenKrupp CSA Siderúrgica do Atlântico, Santa Cruz, Brasilien

In der Bucht von Sepetiba im Staat Rio de Janeiro in Brasilien entstand ein neues Stahlwerk mit eindrucksvollen Dimensionen. Das Werk wird fünf Mio Tonnen Stahl im Jahr produzieren, 3.500 Menschen beschäftigen und auch in punkto Umweltschutz wegweisend sein. Für ThyssenKrupp ist das neue Stahlwerk ein Jahrhundertprojekt. Auch für die Umgebung des Werkes bedeutet die Eröffnung den Start in eine erfolgreiche Zukunft. Und das gilt nicht nur für die Menschen, die dort arbeiten.

Alphabetisierungsprogramme und  
berufliche Qualifikationsmaßnahmen  
sowie Ausbildungsprogramme

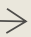

Einrichtung einer technischen  
Akademie in der Gemeinde Itaguai

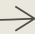

Kooperation und Wissensaustausch  
mit Universitäten zur Vernetzung  
von Lehre und Wirtschaft

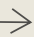

Bau eines Kais, einer Kühlhalle und  
einer Fischfarm zur Unterstützung der  
örtlichen Fischer

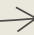

Stärkung von Wirtschaftskraft  
und Wohlstand in der Region

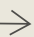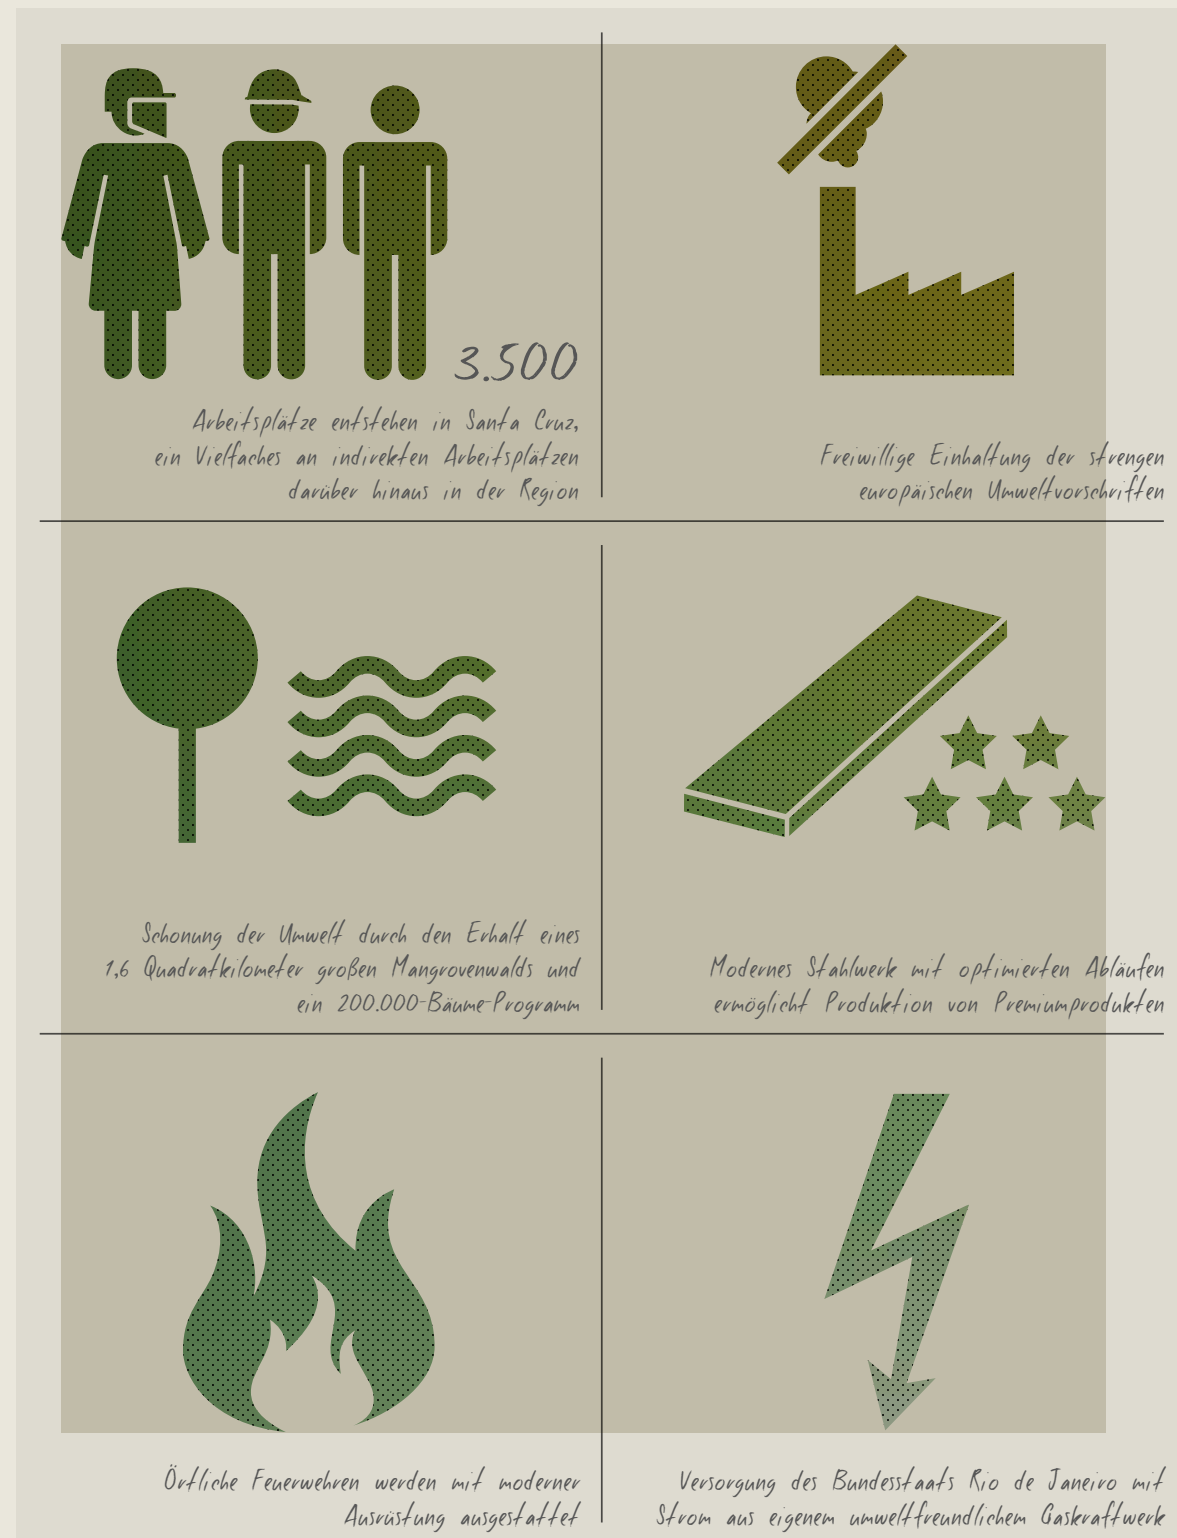

Impulse  
geben

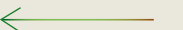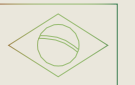



# ThyssenKrupp AG

## Konzern-Bilanz

### AKTIVA Mio €

|                                                   | Anhang-Nr. | 30.09.2009    | 30.09.2010    |
|---------------------------------------------------|------------|---------------|---------------|
| Immaterielle Vermögenswerte                       | 04         | 4.642         | 4.651         |
| Sachanlagen                                       | 05, 29     | 13.793        | 16.322        |
| Als Finanzinvestition gehaltene Immobilien        | 06         | 341           | 337           |
| Nach der Equity-Methode bilanzierte Beteiligungen | 07         | 480           | 522           |
| Sonstige finanzielle Vermögenswerte               | 11         | 94            | 127           |
| Sonstige nicht finanzielle Vermögenswerte         | 12         | 455           | 200           |
| Aktive latente Steuern                            | 31         | 638           | 590           |
| <b>Langfristige Vermögenswerte</b>                |            | <b>20.443</b> | <b>22.749</b> |
| Vorräte                                           | 09         | 6.735         | 8.262         |
| Forderungen aus Lieferungen und Leistungen        | 10         | 5.120         | 5.882         |
| Sonstige finanzielle Vermögenswerte               | 11         | 1.253         | 685           |
| Sonstige nicht finanzielle Vermögenswerte         | 12         | 1.724         | 1.646         |
| Laufende Ertragsteueransprüche                    |            | 252           | 315           |
| Zahlungsmittel und Zahlungsmitteläquivalente      |            | 5.349         | 3.380         |
| Zur Veräußerung vorgesehene Vermögenswerte        | 03         | 491           | 793           |
| <b>Kurzfristige Vermögenswerte</b>                |            | <b>20.924</b> | <b>20.963</b> |
| <b>Summe Vermögenswerte</b>                       |            | <b>41.367</b> | <b>43.712</b> |

### PASSIVA Mio €

|                                                                                  | Anhang-Nr. | 30.09.2009    | 30.09.2010    |
|----------------------------------------------------------------------------------|------------|---------------|---------------|
| Gezeichnetes Kapital                                                             |            | 1.317         | 1.317         |
| Kapitalrücklage                                                                  |            | 4.684         | 4.684         |
| Gewinnrücklagen*                                                                 |            | 3.643         | 3.703         |
| Kumuliertes sonstiges Ergebnis*                                                  |            | - 296         | 192           |
| davon entfallen auf Disposal Groups (30.09.2009: -12; 30.09.2010: 0)             |            |               |               |
| Eigene Anteile                                                                   |            | - 1.421       | - 1.396       |
| <b>Eigenkapital der Aktionäre der ThyssenKrupp AG</b>                            |            | <b>7.927</b>  | <b>8.500</b>  |
| Nicht beherrschende Anteile                                                      |            | 1.769         | 1.888         |
| <b>Eigenkapital</b>                                                              | <b>13</b>  | <b>9.696</b>  | <b>10.388</b> |
| Rückstellungen für Pensionen und ähnliche Verpflichtungen                        | 15         | 7.525         | 8.086         |
| Sonstige Rückstellungen                                                          | 16         | 792           | 829           |
| Passive latente Steuern                                                          | 31         | 307           | 139           |
| Finanzschulden                                                                   | 17         | 7.160         | 6.157         |
| Sonstige finanzielle Verbindlichkeiten                                           | 19         | 4             | 0             |
| Sonstige nicht finanzielle Verbindlichkeiten                                     | 20         | 46            | 23            |
| <b>Langfristige Verbindlichkeiten</b>                                            |            | <b>15.834</b> | <b>15.234</b> |
| Sonstige Rückstellungen                                                          | 16         | 2.040         | 1.778         |
| Laufende Ertragsteuerverbindlichkeiten                                           |            | 794           | 532           |
| Finanzschulden                                                                   | 17         | 305           | 1.278         |
| Verbindlichkeiten aus Lieferungen und Leistungen                                 | 18         | 4.169         | 5.411         |
| Sonstige finanzielle Verbindlichkeiten                                           | 19         | 1.585         | 1.641         |
| Sonstige nicht finanzielle Verbindlichkeiten                                     | 20         | 6.656         | 6.906         |
| Verbindlichkeiten in Verbindung mit zur Veräußerung vorgesehenen Vermögenswerten | 03         | 288           | 544           |
| <b>Kurzfristige Verbindlichkeiten</b>                                            |            | <b>15.837</b> | <b>18.090</b> |
| <b>Verbindlichkeiten</b>                                                         |            | <b>31.671</b> | <b>33.324</b> |
| <b>Summe Eigenkapital und Verbindlichkeiten</b>                                  |            | <b>41.367</b> | <b>43.712</b> |

\* Der Vorjahresbetrag wurde angepasst.

Siehe auch die begleitenden Erläuterungen im Konzern-Anhang.

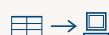

Download der Tabellen unter:

[http://www.thyssenkrupp.com/financial-reports/09\\_10/de/](http://www.thyssenkrupp.com/financial-reports/09_10/de/)



# ThyssenKrupp AG

## Konzern-Gewinn- und Verlustrechnung

Mio €, mit Ausnahme Ergebnis je Aktie in €

|                                                                                  | Anhang-Nr. | 2008/2009      | 2009/2010    |
|----------------------------------------------------------------------------------|------------|----------------|--------------|
| Umsatzerlöse                                                                     | 24, 26     | 40.563         | 42.621       |
| Umsatzkosten                                                                     | 04, 05     | - 36.905       | - 36.259     |
| <b>Bruttoergebnis vom Umsatz</b>                                                 |            | <b>3.658</b>   | <b>6.362</b> |
| Vertriebskosten                                                                  |            | - 2.892        | - 2.741      |
| Allgemeine Verwaltungskosten                                                     |            | - 2.471        | - 2.277      |
| Sonstige betriebliche Erträge                                                    | 27         | 382            | 416          |
| Sonstige betriebliche Aufwendungen                                               | 04, 28     | - 518          | - 709        |
| Ergebnis aus dem Verkauf von konsolidierten Gesellschaften                       |            | - 5            | 223          |
| <b>Betriebliches Ergebnis</b>                                                    |            | <b>- 1.846</b> | <b>1.274</b> |
| Ergebnis aus nach der Equity-Methode bilanzierten Beteiligungen                  |            | - 29           | 56           |
| Zinserträge                                                                      |            | 263            | 344          |
| Zinsaufwendungen                                                                 |            | - 964          | - 996        |
| Sonstiges Finanzergebnis                                                         |            | 212            | 457          |
| <b>Finanzergebnis</b>                                                            | 30         | <b>- 518</b>   | <b>- 139</b> |
| <b>Ergebnis vor Steuern</b>                                                      |            | <b>- 2.364</b> | <b>1.135</b> |
| Steuern vom Einkommen und vom Ertrag                                             | 31         | 491            | - 208        |
| <b>Jahresüberschuss/(-fehlbetrag)</b>                                            |            | <b>- 1.873</b> | <b>927</b>   |
| <b>Davon:</b>                                                                    |            |                |              |
| Anteil der Aktionäre der ThyssenKrupp AG                                         |            | - 1.857        | 824          |
| Nicht beherrschende Anteile                                                      |            | - 16           | 103          |
| <b>Jahresüberschuss/(-fehlbetrag)</b>                                            |            | <b>- 1.873</b> | <b>927</b>   |
| <b>Ergebnis je Aktie (unverwässert/verwässert) bezogen auf</b>                   | 32         |                |              |
| <b>Jahresüberschuss/(-fehlbetrag) (Anteil der Aktionäre der ThyssenKrupp AG)</b> |            | <b>- 4,01</b>  | <b>1,77</b>  |

Siehe auch die begleitenden Erläuterungen im Konzern-Anhang.

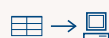

Download der Tabellen unter:

[http://www.thyssenkrupp.com/financial-reports/09\\_10/de/](http://www.thyssenkrupp.com/financial-reports/09_10/de/)



# ThyssenKrupp AG

## Konzern-Gesamtergebnisrechnung

Mio €

|                                                                                                                         | 2008/2009      | 2009/2010    |
|-------------------------------------------------------------------------------------------------------------------------|----------------|--------------|
| <b>Jahresüberschuss/(-fehlbetrag)</b>                                                                                   | <b>- 1.873</b> | <b>927</b>   |
| Unterschiedsbetrag aus der Währungsumrechnung                                                                           |                |              |
| Veränderung der unrealisierten Gewinne/(Verluste)                                                                       | - 44           | 469          |
| Realisierte (Gewinne)/Verluste                                                                                          | 0              | 14           |
| <b>Unrealisierte Gewinne/(Verluste), gesamt</b>                                                                         | <b>- 44</b>    | <b>483</b>   |
| Unrealisierte Gewinne/(Verluste) aus zur Veräußerung verfügbaren finanziellen Vermögenswerten                           |                |              |
| Veränderung der unrealisierten Gewinne/(Verluste)                                                                       | 7              | 0            |
| Realisierte (Gewinne)/Verluste                                                                                          | 0              | 0            |
| Steuereffekt                                                                                                            | 0              | 1            |
| <b>Unrealisierte Gewinne/(Verluste), gesamt</b>                                                                         | <b>7</b>       | <b>1</b>     |
| Versicherungsmathematische Gewinne/(Verluste) aus Pensionen und ähnlichen Verpflichtungen                               |                |              |
| Veränderung der versicherungsmathematischen Gewinne/(Verluste)                                                          | - 1.069        | - 866        |
| Steuereffekt                                                                                                            | 353            | 219          |
| <b>Versicherungsmathematische Gewinne/(Verluste) aus Pensionen und ähnlichen Verpflichtungen, gesamt</b>                | <b>- 716</b>   | <b>- 647</b> |
| Gewinne/(Verluste) aus "asset ceiling"                                                                                  |                |              |
| Veränderung der Gewinne/(Verluste)                                                                                      | 3              | - 60         |
| Steuereffekt                                                                                                            | 0              | 15           |
| <b>Gewinne/(Verluste) aus "asset ceiling", gesamt</b>                                                                   | <b>3</b>       | <b>- 45</b>  |
| Unrealisierte Gewinne/(Verluste) aus derivativen Finanzinstrumenten                                                     |                |              |
| Veränderung der unrealisierten Gewinne/(Verluste)                                                                       | 231            | 100          |
| Realisierte (Gewinne)/Verluste                                                                                          | - 9            | - 35         |
| Steuereffekt                                                                                                            | - 69           | - 20         |
| <b>Unrealisierte Gewinne/(Verluste), gesamt</b>                                                                         | <b>153</b>     | <b>45</b>    |
| Anteil an den unrealisierten Gewinnen/(Verlusten), der auf nach der Equity-Methode bilanzierte Beteiligungen entfällt   | - 6            | 6            |
| <b>Sonstiges Ergebnis</b>                                                                                               | <b>- 603</b>   | <b>- 157</b> |
| <b>Gesamtergebnis</b>                                                                                                   | <b>- 2.476</b> | <b>770</b>   |
| <b>Davon:</b>                                                                                                           |                |              |
| <b>Anteil der Aktionäre der ThyssenKrupp AG</b>                                                                         | <b>- 2.449</b> | <b>615</b>   |
| Nicht beherrschende Anteile                                                                                             | - 27           | 155          |
| Aufgelaufene versicherungsmathematische Gewinne/(Verluste) aus Pensionen und ähnlichen Verpflichtungen zum Periodenende | - 530          | - 1.501      |

Siehe auch die begleitenden Erläuterungen im Konzern-Anhang.



Download der Tabellen unter:

[http://www.thyssenkrupp.com/financial-reports/09\\_10/de/](http://www.thyssenkrupp.com/financial-reports/09_10/de/)



# ThyssenKrupp AG

## Konzern-Eigenkapitalveränderungsrechnung

Mio €, mit Ausnahme der Aktienanzahl

| Eigenkapitalanteil der Aktionäre der ThyssenKrupp AG      |                           |                              |                      |                      |                                                                        |                                                                             |                                      |                                                                                                       |                   |                |                                        |                               |
|-----------------------------------------------------------|---------------------------|------------------------------|----------------------|----------------------|------------------------------------------------------------------------|-----------------------------------------------------------------------------|--------------------------------------|-------------------------------------------------------------------------------------------------------|-------------------|----------------|----------------------------------------|-------------------------------|
|                                                           | Aktienanzahl<br>im Umlauf | Gezeich-<br>netes<br>Kapital | Kapital-<br>rücklage | Gewinn-<br>rücklagen | Kumuliertes sonstiges Ergebnis                                         |                                                                             |                                      |                                                                                                       | Eigene<br>Anteile | Gesamt         | Nicht<br>beherr-<br>schende<br>Anteile | Gesamtes<br>Eigen-<br>kapital |
|                                                           |                           |                              |                      |                      | Unter-<br>scheid-<br>betrag<br>aus der<br>Währungs-<br>um-<br>rechnung | Zur<br>Veräuße-<br>rung<br>verfügbare<br>finanzielle<br>Vermögens-<br>werte | Derivative<br>Finanz-<br>instrumente | Anteil,<br>der auf<br>nach der<br>Equity-<br>Methode<br>bilanzierte<br>Beteili-<br>gungen<br>entfällt |                   |                |                                        |                               |
| <b>Stand am 30.09.2008</b>                                | <b>463.473.492</b>        | <b>1.317</b>                 | <b>4.684</b>         | <b>6.845</b>         | <b>- 283</b>                                                           | <b>- 2</b>                                                                  | <b>- 130</b>                         | <b>- 3</b>                                                                                            | <b>- 1.421</b>    | <b>11.007</b>  | <b>482</b>                             | <b>11.489</b>                 |
| Jahresfehlbetrag                                          |                           |                              |                      | - 1.857              |                                                                        |                                                                             |                                      |                                                                                                       |                   | - 1.857        | - 16                                   | - 1.873                       |
| Sonstiges Ergebnis                                        |                           |                              |                      | - 714                | - 46                                                                   | 7                                                                           | 163                                  | - 2                                                                                                   |                   | - 592          | - 11                                   | - 603                         |
| <b>Gesamtergebnis</b>                                     |                           |                              |                      | <b>- 2.571</b>       | <b>- 46</b>                                                            | <b>7</b>                                                                    | <b>163</b>                           | <b>- 2</b>                                                                                            |                   | <b>- 2.449</b> | <b>- 27</b>                            | <b>- 2.476</b>                |
| Gewinnausschüttungen<br>an nicht beherrschende<br>Anteile |                           |                              |                      |                      |                                                                        |                                                                             |                                      |                                                                                                       |                   | 0              | - 47                                   | - 47                          |
| Dividendenzahlung                                         |                           |                              |                      | - 603                |                                                                        |                                                                             |                                      |                                                                                                       |                   | - 603          | 0                                      | - 603                         |
| Aktienbasierte<br>Vergütung                               |                           |                              |                      | 2                    |                                                                        |                                                                             |                                      |                                                                                                       |                   | 2              | 0                                      | 2                             |
| Sonstige<br>Veränderungen                                 |                           |                              |                      | - 30                 |                                                                        |                                                                             |                                      |                                                                                                       |                   | - 30           | 1.361                                  | 1.331                         |
| <b>Stand am 30.09.2009</b>                                | <b>463.473.492</b>        | <b>1.317</b>                 | <b>4.684</b>         | <b>3.643</b>         | <b>- 329</b>                                                           | <b>5</b>                                                                    | <b>33</b>                            | <b>- 5</b>                                                                                            | <b>- 1.421</b>    | <b>7.927</b>   | <b>1.769</b>                           | <b>9.696</b>                  |
| Jahresüberschuss                                          |                           |                              |                      | 824                  |                                                                        |                                                                             |                                      |                                                                                                       |                   | 824            | 103                                    | 927                           |
| Sonstiges Ergebnis                                        |                           |                              |                      | - 697                | 456                                                                    | 0                                                                           | 17                                   | 15                                                                                                    |                   | - 209          | 52                                     | - 157                         |
| <b>Gesamtergebnis</b>                                     |                           |                              |                      | <b>127</b>           | <b>456</b>                                                             | <b>0</b>                                                                    | <b>17</b>                            | <b>15</b>                                                                                             |                   | <b>615</b>     | <b>155</b>                             | <b>770</b>                    |
| Gewinnausschüttungen<br>an nicht beherrschende<br>Anteile |                           |                              |                      |                      |                                                                        |                                                                             |                                      |                                                                                                       |                   | 0              | - 44                                   | - 44                          |
| Dividendenzahlung                                         |                           |                              |                      | - 139                |                                                                        |                                                                             |                                      |                                                                                                       |                   | - 139          | 0                                      | - 139                         |
| Veräußerung eigener<br>Anteile                            | 920.845                   |                              |                      | - 7                  |                                                                        |                                                                             |                                      |                                                                                                       | 28                | 21             | 0                                      | 21                            |
| Steuereffekt aus der<br>Abschreibung eigener<br>Anteile   |                           |                              |                      | 3                    |                                                                        |                                                                             |                                      |                                                                                                       | - 3               | 0              | 0                                      | 0                             |
| Aktienbasierte<br>Vergütung                               |                           |                              |                      | - 7                  |                                                                        |                                                                             |                                      |                                                                                                       |                   | - 7            | 0                                      | - 7                           |
| Sonstige<br>Veränderungen                                 |                           |                              |                      | 83                   |                                                                        |                                                                             |                                      |                                                                                                       |                   | 83             | 8                                      | 91                            |
| <b>Stand am 30.09.2010</b>                                | <b>464.394.337</b>        | <b>1.317</b>                 | <b>4.684</b>         | <b>3.703</b>         | <b>127</b>                                                             | <b>5</b>                                                                    | <b>50</b>                            | <b>10</b>                                                                                             | <b>- 1.396</b>    | <b>8.500</b>   | <b>1.888</b>                           | <b>10.388</b>                 |

Siehe auch die begleitenden Erläuterungen im Konzern-Anhang.



Download der Tabellen unter:

[http://www.thyssenkrupp.com/financial-reports/09\\_10/de/](http://www.thyssenkrupp.com/financial-reports/09_10/de/)



# ThyssenKrupp AG

## Konzern-Kapitalflussrechnung

Mio €

|                                                                                                                                         | 2008/2009      | 2009/2010      |
|-----------------------------------------------------------------------------------------------------------------------------------------|----------------|----------------|
| Jahresüberschuss/(-fehlbetrag)                                                                                                          | - 1.873        | 927            |
| Anpassungen des Jahresüberschusses/(-fehlbetrages) für die Überleitung zum Operating Cash-Flow:                                         |                |                |
| Latente Steueraufwendungen/(-erträge)                                                                                                   | - 719          | 158            |
| Abschreibungen und Wertminderungen langfristiger Vermögenswerte                                                                         | 1.857          | 1.446          |
| Zuschreibungen langfristiger Vermögenswerte                                                                                             | - 3            | - 9            |
| Ergebnisse aus nach der Equity-Methode bilanzierten Beteiligungen, soweit nicht zahlungswirksam                                         | 43             | - 53           |
| Ergebnis aus dem Abgang langfristiger Vermögenswerte                                                                                    | - 30           | - 224          |
| Veränderungen bei Aktiva und Passiva, bereinigt um Effekte aus Konsolidierungskreis- und anderen nicht zahlungswirksamen Veränderungen: |                |                |
| - Vorräte                                                                                                                               | 2.680          | - 1.445        |
| - Forderungen aus Lieferungen und Leistungen                                                                                            | 2.538          | - 696          |
| - Rückstellungen für Pensionen und ähnliche Verpflichtungen                                                                             | - 21           | - 317          |
| - Sonstige Rückstellungen                                                                                                               | 578            | - 220          |
| - Verbindlichkeiten aus Lieferungen und Leistungen                                                                                      | - 1.504        | 1.231          |
| - Übrige Aktiva/Passiva, soweit nicht Investitions- oder Finanzierungstätigkeit                                                         | 153            | 70             |
| <b>Operating Cash-Flow</b>                                                                                                              | <b>3.699</b>   | <b>868</b>     |
| Investitionen in nach der Equity-Methode bilanzierten Beteiligungen und in langfristige finanzielle Vermögenswerte                      | - 43           | - 52           |
| Auszahlungen für den Erwerb von konsolidierten Gesellschaften*                                                                          | - 24           | - 53           |
| Übernommene Zahlungsmittel und Zahlungsmitteläquivalente aus dem Erwerb von konsolidierten Gesellschaften                               | 2              | 3              |
| Investitionen in Sachanlagen (einschl. geleisteter Anzahlungen) und in als Finanzinvestition gehaltene Immobilien                       | - 3.821        | - 3.299        |
| Investitionen in immaterielle Vermögenswerte (einschl. geleisteter Anzahlungen)                                                         | - 191          | - 109          |
| Desinvestitionen von nach der Equity-Methode bilanzierten Beteiligungen und langfristigen finanziellen Vermögenswerten                  | 59             | 3              |
| Einzahlungen aus dem Verkauf von bislang konsolidierten Gesellschaften                                                                  | 6              | 479            |
| Abgegebene Zahlungsmittel und Zahlungsmitteläquivalente aus dem Verkauf von konsolidierten Gesellschaften                               | - 5            | - 5            |
| Desinvestitionen von Sachanlagen und als Finanzinvestition gehaltenen Immobilien                                                        | 121            | 71             |
| Desinvestitionen von immateriellen Vermögenswerten                                                                                      | 18             | 4              |
| <b>Cash-Flow aus Investitionstätigkeit</b>                                                                                              | <b>- 3.878</b> | <b>- 2.958</b> |
| Einzahlungen aus der Begebung von Anleihen                                                                                              | 2.986          | 0              |
| Tilgung von Anleihen                                                                                                                    | - 500          | 0              |
| Einzahlungen aus der Aufnahme von Verbindlichkeiten gegenüber Kreditinstituten                                                          | 3.245          | 788            |
| Tilgung von Verbindlichkeiten gegenüber Kreditinstituten                                                                                | - 2.529        | - 951          |
| Zunahme Verbindlichkeiten Schuldschein-/Sonstige Darlehen                                                                               | 39             | 13             |
| Abnahme Akzeptverbindlichkeiten                                                                                                         | - 16           | - 3            |
| Abnahme Verbindlichkeiten aus nicht ausgebuchten Forderungen                                                                            | - 3            | 0              |
| Abnahme/(Zunahme) kurzfristige Wertpapiere                                                                                              | - 48           | 190            |
| Einzahlungen in das Eigenkapital durch nicht beherrschende Anteile                                                                      | 465            | 500            |
| Einzahlungen aus der Veräußerung eigener Anteile                                                                                        | 0              | 8              |
| Dividendenzahlung der ThyssenKrupp AG                                                                                                   | - 603          | - 139          |
| Gewinnausschüttungen an nicht beherrschende Anteile                                                                                     | - 47           | - 44           |
| Auszahlungen für den Erwerb von Anteilen an bereits konsolidierten Gesellschaften                                                       | - 159          | - 13           |
| Sonstige Finanzierungsvorgänge                                                                                                          | - 6            | - 94           |
| <b>Cash-Flow aus Finanzierungstätigkeit</b>                                                                                             | <b>2.824</b>   | <b>255</b>     |
| <b>Zahlungswirksame Zunahme/(Abnahme) der Zahlungsmittel und Zahlungsmitteläquivalente</b>                                              | <b>2.645</b>   | <b>- 1.835</b> |
| Einfluss von Wechselkursänderungen auf die Zahlungsmittel und Zahlungsmitteläquivalente                                                 | 5              | 133            |
| Zahlungsmittel und Zahlungsmitteläquivalente am Beginn des Geschäftsjahres                                                              | 2.725          | 5.375          |
| <b>Zahlungsmittel und Zahlungsmitteläquivalente am Ende des Geschäftsjahres</b>                                                         | <b>5.375</b>   | <b>3.673</b>   |
| (davon Zahlungsmittel und Zahlungsmitteläquivalente der Disposal Groups)                                                                | (26)           | (293)          |
| Ergänzende Informationen zu Zahlungsvorgängen, die im Operating Cash-Flow enthalten sind:                                               |                |                |
| Zinseinzahlungen                                                                                                                        | 149            | 225            |
| Zinsauszahlungen                                                                                                                        | - 342          | - 539          |
| Erhaltene Dividenden                                                                                                                    | 18             | 14             |
| Einzahlungen/(Auszahlungen) für Steuern vom Einkommen und Ertrag                                                                        | 164            | - 282          |

\* Der Vorjahresbetrag wurde angepasst auf Grund der Erstanwendung des überarbeiteten IAS 7.  
Siehe Anhang Nr. 34 im Konzern-Anhang.

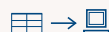

Download der Tabellen unter:

[http://www.thyssenkrupp.com/financial-reports/09\\_10/de/](http://www.thyssenkrupp.com/financial-reports/09_10/de/)



# ThyssenKrupp AG

## Konzern-Anhang

### Unternehmensinformation

Die ThyssenKrupp Aktiengesellschaft („ThyssenKrupp AG“ oder „Gesellschaft“) ist eine börsennotierte Kapitalgesellschaft mit Sitz in Deutschland. Der vorliegende Konzernabschluss der ThyssenKrupp AG und ihrer Tochtergesellschaften („Konzern“) zum 30. September 2010 wurde mit Beschluss des Vorstands vom 08. November 2010 zur Veröffentlichung freigegeben.

### Grundlagen der Berichterstattung

Der vorliegende Konzernabschluss wurde unter Anwendung von § 315a HGB („Konzernabschluss nach internationalen Rechnungslegungsstandards“) im Einklang mit den International Financial Reporting Standards (IFRS) und den diesbezüglichen Interpretationen des International Accounting Standards Board (IASB) erstellt, wie sie gemäß der Verordnung Nr. 1606/2002 des Europäischen Parlamentes und des Rates über die Anwendung Internationaler Rechnungslegungsstandards in der Europäischen Union anzuwenden sind.

## 01 Grundsätze der Rechnungslegung

Die Aufstellung des Konzernabschlusses erfolgt mit Ausnahme bestimmter Finanzinstrumente, die zu Zeitwerten ausgewiesen werden, auf Basis historischer Anschaffungs- oder Herstellungskosten. Der Konzernabschluss wird in Euro (€) aufgestellt, da dies die Währung ist, in der die Mehrzahl der Transaktionen des Konzerns durchgeführt wird. Alle Beträge werden, soweit nicht anders dargestellt, in Millionen Euro (Mio €) angegeben. Es können sich Abweichungen zu den ungerundeten Beträgen ergeben.

### Konsolidierung

In den Konzernabschluss sind die ThyssenKrupp AG sowie alle wesentlichen Unternehmen, die die ThyssenKrupp AG mittelbar oder unmittelbar beherrscht, einbezogen. Beherrschung besteht dann, wenn die ThyssenKrupp AG über mehr als die Hälfte der Stimmrechte einer Gesellschaft verfügt oder auf andere Weise die Möglichkeit besitzt, die Finanz- und Geschäftspolitik einer Gesellschaft zu bestimmen, um aus deren Tätigkeit Nutzen zu ziehen. Bei der Bestimmung eines Beherrschungsverhältnisses werden auch potenzielle Stimmrechte, die gegenwärtig ausgeübt oder umgewandelt werden können, berücksichtigt. Die Abschlüsse der Tochtergesellschaften werden vom Tag der Erlangung der Beherrschung bis zur Beendigung der Beherrschung in den Konzernabschluss einbezogen. Bei einem Unternehmenserwerb werden alle identifizierbaren Vermögenswerte, Verbindlichkeiten und Eventualverbindlichkeiten des erworbenen Unternehmens zu beizulegenden Zeitwerten zum Erwerbsstichtag bewertet. Anteile anderer Gesellschafter werden entsprechend ihrer Anteile an den beizulegenden Zeitwerten der identifizierbaren Vermögenswerte, Verbindlichkeiten und Eventualverbindlichkeiten ausgewiesen.

Alle Forderungen und Verbindlichkeiten, Umsätze, Aufwendungen und Erträge sowie Zwischenergebnisse zwischen Konzernunternehmen werden im Rahmen der Konsolidierung eliminiert.

Im Konzernabschluss werden 201 (i. Vj. 226) inländische und 513 (i. Vj. 518) ausländische mittelbar oder unmittelbar beherrschte Unternehmen konsolidiert. Im Berichtsjahr 2009/2010 wurden 27 Unternehmen erstmals konsolidiert. Gleichzeitig verringerte sich die Anzahl der konsolidierten Unternehmen um 57, wobei 39 Abgänge aus konzerninternen Verschmelzungen resultieren.

25 (i. Vj. 33) Tochterunternehmen, deren Einfluss auf die Vermögens-, Finanz- und Ertragslage des Konzerns von untergeordneter Bedeutung ist, werden nicht konsolidiert; ihr Umsatz beträgt 0,02 % des Konzernumsatzes, ihr Ergebnis 0,01 % des Konzernergebnisses (vor Steuern) und ihr Eigenkapital 0,02 % des Konzerneigenkapitals. Sie werden zum beizulegenden Zeitwert oder, sofern sich dieser für nicht börsennotierte Eigenkapitalinstrumente nicht hinreichend verlässlich ermitteln lässt, zu Anschaffungskosten bewertet und innerhalb der langfristigen sonstigen finanziellen Vermögenswerte ausgewiesen.

Assoziierte Unternehmen werden nach der Equity-Methode bilanziert. Ein assoziiertes Unternehmen ist ein Unternehmen, auf das der Konzern durch Mitwirkung an der Finanz- und Geschäftspolitik maßgeblichen Einfluss, jedoch keine Beherrschung, ausüben kann. Maßgeblicher Einfluss wird grundsätzlich angenommen, wenn der Konzern einen Stimmrechtsanteil von 20 % oder mehr hält (assoziierte Unternehmen). Soweit ein Konzernunternehmen mit einem assoziierten Unternehmen Transaktionen durchführt, werden daraus resultierende nicht realisierte Gewinne oder Verluste entsprechend dem Anteil des Konzerns an dem assoziierten Unternehmen eliminiert.

Gemeinschaftlich geführte Unternehmen (Joint Ventures) werden nach der Equity-Methode bilanziert. Soweit der Konzern Transaktionen mit einem gemeinschaftlich geführten Unternehmen durchführt, werden daraus resultierende nicht realisierte Gewinne oder Verluste entsprechend dem Anteil des Konzerns an dem gemeinschaftlich geführten Unternehmen eliminiert.

12 (i. Vj. 16) assoziierte Unternehmen und 19 (i. Vj. 20) Joint Ventures werden im Konzern nach der Equity-Methode bewertet. Darüber hinaus werden 22 (i. Vj. 24) assoziierte Unternehmen wegen der untergeordneten Bedeutung für die Vermögens-, Finanz- und Ertragslage des Konzerns zum beizulegenden Zeitwert oder, sofern sich dieser für nicht börsennotierte Eigenkapitalinstrumente nicht hinreichend verlässlich ermitteln lässt, zu Anschaffungskosten bewertet und innerhalb der langfristigen sonstigen finanziellen Vermögenswerte ausgewiesen; das anteilige Ergebnis dieser assoziierten Unternehmen von untergeordneter Bedeutung beträgt 0,75 % des Konzernergebnisses (vor Steuern) und ihr anteiliges Eigenkapital 0,74 % des Konzerneigenkapitals.



Die vollständige Aufstellung über den Anteilsbesitz des Konzerns ist unter Anhang-Nr. 37 aufgeführt.

Ein aus einem Unternehmenserwerb resultierender Firmenwert repräsentiert den Betrag, um den die Anschaffungskosten den Konzernanteil an den beizulegenden Zeitwerten der identifizierbaren Vermögenswerte, Verbindlichkeiten und Eventualverbindlichkeiten des Tochterunternehmens, assoziierten oder gemeinschaftlich geführten Unternehmens zum Erwerbsstichtag übersteigen. Der Firmenwert wird als Vermögenswert bilanziert und jährlich einem Werthaltigkeitstest (Impairment-Test) unterzogen, sofern nicht darüber hinaus zu weiteren Zeitpunkten Hinweise bestehen oder Ereignisse eintreten, die eine Wertminderung vermuten lassen.

Firmenwerte, die aus dem Erwerb eines assoziierten oder eines gemeinschaftlich geführten Unternehmens entstehen, sind in den fortgeführten Beteiligungsbuchwerten der assoziierten bzw. gemeinschaftlich geführten Unternehmen enthalten. Firmenwerte, die aus dem Erwerb eines Tochterunternehmens resultieren, werden gesondert in der Bilanz ausgewiesen.

Im Falle der Veräußerung eines Tochterunternehmens, eines assoziierten oder eines gemeinschaftlich geführten Unternehmens wird der zurechenbare Anteil des Firmenwertes bei der Ermittlung des Veräußerungsergebnisses berücksichtigt.

### Währungsumrechnung

Die funktionale Währung und die Berichtswährung der ThyssenKrupp AG und der relevanten europäischen Tochtergesellschaften ist der Euro (€). Transaktionen in Fremdwährung werden zum Zeitpunkt der Transaktion mit dem zu diesem Zeitpunkt gültigen Wechselkurs erfasst. Nominal in Fremdwährung gebundene Vermögenswerte und Verbindlichkeiten werden jeweils mit dem Kurs zum Bilanzstichtag umgerechnet. Dabei entstehende Umrechnungsdifferenzen werden ergebniswirksam erfasst.

Die Jahresabschlüsse der in den Konzernabschluss einbezogenen ausländischen Tochterunternehmen, deren funktionale Währung nicht der Euro ist, werden auf Basis ihrer funktionalen Währung, welche in der Regel der Landeswährung entspricht, in die Konzernwährung Euro umgerechnet. Die Umrechnung erfolgt nach der Stichtagskursmethode, nach welcher die Bilanzen von der funktionalen Währung in die Berichtswährung mit dem Mittelkurs zum Bilanzstichtag, die Gewinn- und Verlustrechnungen mit den Durchschnittskursen der Berichtsperiode umgerechnet werden. Nettogewinne oder -verluste, die aus der Währungsumrechnung resultieren, werden zusammengefasst und innerhalb des Eigenkapitals ausgewiesen. Solche Umrechnungsdifferenzen werden in der Periode, in der das betreffende Tochterunternehmen veräußert wird, ergebniswirksam erfasst.

Bei Gesellschaften, die ihre Absatz- und Beschaffungsgeschäfte sowie ihre Finanzierung im Wesentlichen nicht in der Landeswährung abwickeln, ist die funktionale Währung die Währung des primären Wirtschaftsumfeldes der Gesellschaft. Die Umrechnung der in Landeswährung aufgestellten Abschlüsse in die funktionale Währung erfolgt in diesen Fällen nach der Zeitbezugsmethode. Danach werden alle nicht monetären Vermögenswerte (z.B. Sachanlagen) einschließlich der hierauf entfallenden Abschreibungen und das Eigenkapital mit den Durchschnittskursen des jeweiligen Zugangsjahres in die funktionale Währung umgerechnet. Alle übrigen Bilanzpositionen werden mit Stichtagskursen und alle übrigen Positionen der Gewinn- und Verlustrechnung mit Durchschnittskursen der Berichtsperiode umgerechnet. Entstehende Umrechnungsdifferenzen werden ergebniswirksam in den sonstigen betrieblichen Erträgen oder Aufwendungen erfasst. Anschließend werden die Abschlüsse in der funktionalen Währung nach der Stichtagskursmethode in die Berichtswährung umgerechnet.

Die Wechselkurse der für den ThyssenKrupp Konzern wesentlichen Währungen haben sich wie folgt entwickelt:

### WÄHRUNGEN

|                      | Stichtagskurs<br>Basis 1 € |            | Jahresdurchschnittskurs<br>Basis 1 € |           |
|----------------------|----------------------------|------------|--------------------------------------|-----------|
|                      | 30.09.2009                 | 30.09.2010 | 2008/2009                            | 2009/2010 |
| US-Dollar            | 1,47                       | 1,37       | 1,35                                 | 1,36      |
| Kanadischer Dollar   | 1,57                       | 1,41       | 1,59                                 | 1,41      |
| Pfund Sterling       | 0,91                       | 0,86       | 0,87                                 | 0,87      |
| Brasilianischer Real | 2,61                       | 2,32       | 2,88                                 | 2,40      |

### Umsatzrealisierung

Umsätze aus Warenverkäufen werden ausgewiesen, sobald die wesentlichen Chancen und Risiken des Eigentums auf den Käufer übergegangen sind und die Höhe der realisierbaren Umsätze verlässlich ermittelt werden kann. Umsätze aus Dienstleistungen werden erfasst, sobald die Leistung erbracht wurde. Keine Umsätze werden ausgewiesen, wenn wesentliche Risiken bezüglich des Erhalts der Gegenleistung oder einer möglichen Warenrückgabe bestehen. Im Übrigen werden Umsätze unter Abzug von Erlösschmälerungen wie Boni, Skonti oder Rabatte ausgewiesen.

Umsätze und Aufwendungen aus Fertigungsaufträgen werden nach der Percentage-of-Completion-Methode bilanziert, wonach die Umsätze entsprechend dem Fertigstellungsgrad ausgewiesen werden. Der Fertigstellungsgrad ergibt sich aus dem Verhältnis der bis zum Stichtag angefallenen Auftragskosten zu den insgesamt zum Stichtag geschätzten Auftragskosten. Ist für die Abwicklung eines Fertigungsauftrags ein beträchtlicher Zeitraum erforderlich, umfassen die Auftragskosten auch direkt zurechenbare Fremdkapitalkosten.



Aufträge, bei denen der Konzern Generalunternehmer- oder Engineeringleistungen erbringt, werden ebenfalls wie Fertigungsaufträge behandelt. Nach der Percentage-of-Completion-Methode bilanzierte Fertigungsaufträge werden entsprechend den zum Stichtag aufgelaufenen Auftragskosten zuzüglich des sich aus dem erreichten Fertigstellungsgrad ergebenden anteiligen Gewinns bewertet. In der Bilanz werden diese Umsatzerlöse abzüglich erhaltener Anzahlungen in den Forderungen aus Lieferungen und Leistungen erfasst. Auftragsänderungen, Nachforderungen oder Leistungsprämien werden berücksichtigt, sofern sie wahrscheinlich zu Erlösen führen, deren Höhe verlässlich geschätzt werden kann.

Wenn das Ergebnis eines Fertigungsauftrags nicht verlässlich schätzbar ist, werden wahrscheinlich erzielbare Umsätze bis zur Höhe der angefallenen Kosten erfasst. Auftragskosten werden in der Periode, in der sie anfallen, als Aufwand ausgewiesen.

Ist absehbar, dass die gesamten Auftragskosten die Auftragserlöse übersteigen, wird der erwartete Verlust unmittelbar als Aufwand ausgewiesen.

Umsatzerlöse aus Verträgen, die mehrere Vertragselemente (z.B. Warenverkäufe in Kombination mit Dienstleistungen) beinhalten, werden erfasst, wenn das jeweilige Vertragselement geliefert oder erbracht worden ist. Die Umsatzrealisierung erfolgt auf Basis objektiv nachvollziehbarer, relativer beizulegender Zeitwerte der einzelnen Vertragselemente.

Zinserträge werden unter Berücksichtigung des ausstehenden Kapitalbetrags und des geltenden Zinssatzes zeitanteilig vereinnahmt. Dividendenerträge aus Kapitalanlagen werden erfasst, wenn der Anspruch auf Zahlung rechtlich entstanden ist.

#### Zuwendungen der öffentlichen Hand

Zuwendungen der öffentlichen Hand werden nur erfasst, wenn eine angemessene Sicherheit dafür besteht, dass die damit verbundenen Bedingungen erfüllt und die Zuwendungen gewährt werden. Investitionszuwendungen werden als Reduzierung der Anschaffungs- oder Herstellungskosten der betreffenden Vermögenswerte erfasst und führen zu einer entsprechenden Reduzierung der planmäßigen Abschreibungen in Folgeperioden. Zuwendungen, die nicht auf Investitionen bezogen sind, werden als sonstige betriebliche Erträge in den Zeiträumen erfasst, in denen die Aufwendungen anfallen, die durch die Zuwendung kompensiert werden sollen.

#### Aufwendungen für Forschung und Entwicklung

Aufwendungen für Forschung werden sofort ergebniswirksam erfasst.

Entwicklungsaufwendungen, die auf eine wesentliche Weiterentwicklung eines Produktes oder Prozesses abzielen, werden aktiviert, wenn das Produkt oder der Prozess technisch und wirtschaftlich

realisierbar ist, die Entwicklung vermarktbar ist, die Aufwendungen zuverlässig bewertbar sind und der Konzern über ausreichende Ressourcen zur Fertigstellung des Entwicklungsprojektes verfügt. Alle übrigen Entwicklungsaufwendungen werden sofort ergebniswirksam erfasst. Aktivierte Entwicklungsaufwendungen abgeschlossener Projekte werden zu Herstellungskosten abzüglich kumulierter Abschreibungen ausgewiesen. Dabei umfassen die Herstellungskosten neben Material- und Fertigungseinzelkosten auch zurechenbare Material- und Fertigungsgemeinkosten. Ist für die Herstellung eines Vermögenswertes ein beträchtlicher Zeitraum erforderlich, um ihn in seinen beabsichtigten gebrauchsfertigen Zustand zu versetzen, werden direkt zurechenbare Fremdkapitalkosten bis zur Erlangung des gebrauchsfertigen Zustandes als Teil der Herstellungskosten aktiviert. Verwaltungskosten werden nur aktiviert, sofern ein direkter Herstellungsbezug besteht. Solange ein Entwicklungsprojekt nicht abgeschlossen ist, erfolgt eine jährliche Überprüfung der Werthaltigkeit der aufgelaufenen aktivierten Beträge, soweit nicht darüber hinaus zu weiteren Zeitpunkten Hinweise dafür bestehen, dass eine Wertminderung eingetreten sein könnte.

#### Ergebnis je Aktie

Das unverwässerte Ergebnis je Aktie (basic earnings per share) ergibt sich aus der Division des auf die Aktionäre der ThyssenKrupp AG entfallenden Anteils am Periodenergebnis durch den gewichteten Durchschnitt der ausgegebenen Aktien. Während einer Periode neu ausgegebene oder zurückgekauft Aktien werden zeitanteilig für den Zeitraum, in dem sie sich im Umlauf befinden, berücksichtigt. In den dargestellten Berichtsperioden gab es keine Verwässerungseffekte.

#### Immaterielle Vermögenswerte

Immaterielle Vermögenswerte mit begrenzter Nutzungsdauer werden zu Anschaffungs- oder Herstellungskosten bilanziert und abhängig von ihrer geschätzten Nutzungsdauer planmäßig über einen Zeitraum von in der Regel 3 bis 15 Jahren linear abgeschrieben. Technologie aus dem Erwerb der Howaldtswerke-Deutsche Werft GmbH (HDW) wird über 40 Jahre abgeschrieben. Die Nutzungsdauer wird jährlich überprüft und gegebenenfalls entsprechend den zukünftigen Erwartungen angepasst. Abschreibungen auf immaterielle Vermögenswerte werden überwiegend in den Umsatzkosten der Konzern-Gewinn- und Verlustrechnung berücksichtigt.

Firmenwerte werden zu Anschaffungskosten bilanziert und jährlich auf Werthaltigkeit überprüft sowie zusätzlich, wenn zu anderen Zeitpunkten Hinweise für eine mögliche Wertminderung vorliegen. Wertminderungsaufwendungen werden in den sonstigen betrieblichen Aufwendungen erfasst.



## Sachanlagen

Abnutzbare Sachanlagen werden zu Anschaffungs- oder Herstellungskosten abzüglich kumulierter Abschreibungen bewertet. Aktivierte Herstellungskosten für selbst erstellte Sachanlagen umfassen neben Material- und Fertigungseinzelkosten auch zurechenbare Material- und Fertigungsgemeinkosten. Ist für die Herstellung eines Vermögenswertes ein beträchtlicher Zeitraum erforderlich, um ihn in seinen beabsichtigten gebrauchsfertigen Zustand zu versetzen, werden direkt zurechenbare Fremdkapalkosten bis zur Erlangung des gebrauchsfertigen Zustandes als Teil der Herstellungskosten des Vermögenswertes aktiviert. Verwaltungskosten werden nur aktiviert, sofern ein direkter Herstellungsbezug besteht. Laufende Instandhaltungs- und Reparaturaufwendungen werden sofort als Aufwand erfasst. Kosten für den Ersatz von Komponenten oder für Generalüberholungen von Sachanlagen werden aktiviert, sofern es wahrscheinlich ist, dass der künftige wirtschaftliche Nutzen dem Konzern zufließt und die Kosten verlässlich ermittelt werden können. Sofern abnutzbare Sachanlagen aus wesentlichen identifizierbaren Komponenten mit jeweils unterschiedlichen Nutzungsdauern bestehen, werden diese Komponenten gesondert ausgewiesen und über ihre jeweilige Nutzungsdauer abgeschrieben.

Abnutzbare Sachanlagen werden planmäßig linear abgeschrieben. Bei Verkauf oder Stilllegung werden die Anschaffungs- oder Herstellungskosten und die entsprechenden kumulierten Abschreibungen der Anlagen aus der Bilanz ausgebucht; dabei entstehende Gewinne oder Verluste werden ergebniswirksam berücksichtigt.

Für die Abschreibungen werden folgende Nutzungsdauern zu Grunde gelegt:

### NUTZUNGSDAUER SACHANLAGEN

|                                                              |                 |
|--------------------------------------------------------------|-----------------|
| Gebäude inklusive als Finanzinvestition gehaltene Immobilien | 10 bis 50 Jahre |
| Grundstückseinrichtungen, Einbauten in Gebäude               | 15 bis 25 Jahre |
| Technische Anlagen und Maschinen                             | 8 bis 25 Jahre  |
| Betriebs- und Geschäftsausstattung                           | 3 bis 10 Jahre  |

### Als Finanzinvestition gehaltene Immobilien

Als Finanzinvestition gehaltene Immobilien umfassen Grundstücke und Gebäude, die zur Erzielung von Mieteinnahmen oder zum Zwecke der Wertsteigerung gehalten werden und nicht für die eigene Produktion, für die Lieferung von Gütern oder die Erbringung von Dienstleistungen, für Verwaltungszwecke oder für den Verkauf im Rahmen der gewöhnlichen Geschäftstätigkeit genutzt werden. Als Finanzinvestition gehaltene Immobilien werden zu Anschaffungs- oder Herstellungskosten abzüglich kumulierter Abschreibungen bewertet. Die beizulegenden Zeitwerte dieser Immobilien sind unter Anhang-Nr. 06 dargestellt.

## Wertminderungen

Zu jedem Bilanzstichtag überprüft der Konzern die Buchwerte der immateriellen Vermögenswerte, Sachanlagen und als Finanzinvestition gehaltenen Immobilien dahingehend, ob Anhaltspunkte dafür vorliegen, dass eine Wertminderung eingetreten sein könnte. In diesem Fall wird der erzielbare Betrag des betreffenden Vermögenswertes ermittelt, um den Umfang einer gegebenenfalls vorzunehmenden Wertberichtigung zu bestimmen. Der erzielbare Betrag entspricht dem beizulegenden Zeitwert abzüglich Veräußerungskosten oder dem Nutzungswert; der höhere Wert ist maßgeblich. Der Nutzungswert entspricht dem Barwert der erwarteten Cash-Flows. Als Diskontierungszinssatz wird ein den Marktbedingungen entsprechender Zinssatz vor Steuern verwendet. Sofern kein erzielbarer Betrag für einen einzelnen Vermögenswert ermittelt werden kann, wird der erzielbare Betrag für die kleinste identifizierbare Gruppe von Vermögenswerten (Cash Generating Unit) bestimmt, der der betreffende Vermögenswert zugeordnet werden kann.

Aus Unternehmenserwerben resultierende Firmenwerte werden den identifizierbaren Gruppen von Vermögenswerten (Cash Generating Units) zugeordnet, die aus den Synergien des Erwerbs Nutzen ziehen sollen. Solche Gruppen stellen die niedrigste Berichtsebene im Konzern dar, auf der Firmenwerte durch das Management für interne Steuerungszwecke überwacht werden. Der erzielbare Betrag einer Cash Generating Unit, die einen Firmenwert enthält, wird regelmäßig jährlich zum 01. Oktober auf Werthaltigkeit überprüft und zusätzlich, wenn zu anderen Zeitpunkten Hinweise für eine mögliche Wertminderung vorliegen. Zu weiteren Einzelheiten verweisen wir auf die Ausführungen unter Anhang-Nr. 04.

Ist der erzielbare Betrag eines Vermögenswertes niedriger als der Buchwert, erfolgt eine sofortige ergebniswirksame Wertberichtigung des Vermögenswertes.

Im Falle von Wertberichtigungen im Zusammenhang mit Cash Generating Units, die einen Firmenwert enthalten, werden zunächst bestehende Firmenwerte reduziert. Übersteigt der Wertberichtigungsbedarf den Buchwert des Firmenwertes, wird die Differenz in der Regel proportional auf die verbleibenden langfristigen Vermögenswerte der Cash Generating Units verteilt.

Ergibt sich nach einer vorgenommenen Wertminderung zu einem späteren Zeitpunkt ein höherer erzielbarer Betrag des Vermögenswertes oder der Cash Generating Unit, erfolgt eine Wertaufholung bis maximal zur Höhe des erzielbaren Betrags. Die Wertaufholung ist begrenzt auf den fortgeführten Buchwert, der sich ohne die Wertberichtigung in der Vergangenheit ergeben hätte. Die vorzunehmende Zuschreibung erfolgt ergebniswirksam. Wertaufholungen von vorgenommenen Wertberichtigungen auf Firmenwerte sind nicht zulässig.



## Leasing

Leasingtransaktionen sind entweder als Finance Lease oder als Operating Lease zu klassifizieren. Leasingtransaktionen, bei denen der Konzern als Leasingnehmer alle wesentlichen Chancen und Risiken, die mit dem Eigentum verbunden sind, trägt, werden als Finance Lease behandelt. Dementsprechend aktiviert der Konzern das Leasingobjekt zum niedrigeren Wert aus beizulegendem Zeitwert und Barwert der Mindestleasingraten und schreibt den Leasinggegenstand in der Folge über die geschätzte Nutzungsdauer oder die kürzere Vertragslaufzeit ab. Zugleich wird eine entsprechende Verbindlichkeit angesetzt, die in der Folgezeit nach der Effektivzinsmethode getilgt und fortgeschrieben wird. Alle übrigen Leasingvereinbarungen, bei denen der Konzern als Leasingnehmer auftritt, werden als Operating Lease behandelt. In diesem Fall werden die Leasingzahlungen linear als Aufwand erfasst.

Leasingtransaktionen, bei denen der Konzern Leasinggeber ist und alle wesentlichen Chancen und Risiken, die mit dem Eigentum verbunden sind, auf den Leasingnehmer überträgt, werden beim Leasinggeber als Verkaufs- und Finanzierungsgeschäft bilanziert. In Höhe des Nettoinvestitionswertes aus dem Leasingverhältnis wird eine Forderung angesetzt und die Zinserträge erfolgswirksam erfasst. Alle übrigen Leasingtransaktionen, bei denen der Konzern Leasinggeber ist, werden als Operating Lease erfasst. In diesem Fall verbleibt der verleaste Gegenstand in der Konzernbilanz und wird planmäßig abgeschrieben. Die Leasingzahlungen werden linear über die Laufzeit des Leasingverhältnisses als Ertrag erfasst.

## Vorräte

Vorräte werden zu Anschaffungs- bzw. Herstellungskosten oder zum niedrigeren Nettoveräußerungswert bewertet. Der Nettoveräußerungswert entspricht dem geschätzten, im normalen Geschäftsgang erzielbaren Verkaufserlös abzüglich geschätzter Fertigstellungs- und Vertriebskosten. In der Regel werden Vorräte nach der Durchschnittskostenmethode bewertet. Die Herstellungskosten umfassen neben Material- und Fertigungseinzelkosten auch auf Basis einer üblichen Kapazitätsauslastung zurechenbare Material- und Fertigungsgemeinkosten.

## Finanzinstrumente

Ein Finanzinstrument ist ein Vertrag, der gleichzeitig bei einem Unternehmen zur Entstehung eines finanziellen Vermögenswertes und bei einem anderen Unternehmen zu einer finanziellen Verbindlichkeit oder einem Eigenkapitalinstrument führt. Finanzinstrumente werden erfasst, sobald ThyssenKrupp Vertragspartei des Finanzinstrumentes wird. Wenn Handelstag und Erfüllungstag auseinander fallen, ist für die erstmalige bilanzielle Erfassung bzw. den bilanziellen Abgang der Erfüllungstag maßgeblich. Als finanzielle Vermögens-

werte oder finanzielle Verbindlichkeiten erfasste Finanzinstrumente werden grundsätzlich unsaldiert ausgewiesen; sie werden nur dann saldiert, wenn bezüglich der Beträge zum gegenwärtigen Zeitpunkt ein Aufrechnungsrecht besteht und beabsichtigt wird, den Ausgleich auf Nettobasis herbeizuführen.

## Bestimmung des beizulegenden Zeitwertes

Für Finanzinstrumente entspricht der beizulegende Zeitwert grundsätzlich dem Betrag, den der Konzern erhalten bzw. zahlen würde, wenn er die Finanzinstrumente am Bilanzstichtag tauschen bzw. begleichen wollte. Sofern Marktpreise an Märkten für Finanzinstrumente quotiert werden, werden diese verwendet. Dies betrifft insbesondere Finanzinstrumente, die als zur Veräußerung verfügbare Vermögenswerte eingestuft sind. Ansonsten werden die beizulegenden Zeitwerte auf Basis der am Bilanzstichtag bestehenden Marktkonditionen – Zinssätze, Devisenkurse, Warenpreise – unter Verwendung der Mittelkurse berechnet. Dabei werden die Zeitwerte mittels anerkannter finanzmathematischer Modelle berechnet, wie z.B. des Optionspreismodells für Devisen- und Zinsoptionen oder der Discounted Cash-Flow-Methode für Zinsswaps. Bei einigen Derivaten basiert der beizulegende Zeitwert auf externen Bewertungen unserer Finanzpartner.

## Finanzielle Vermögenswerte

Finanzielle Vermögenswerte beinhalten insbesondere Forderungen aus Lieferungen und Leistungen, Zahlungsmittel und Zahlungsmitteläquivalente, derivative finanzielle Vermögenswerte sowie gehaltene Eigenkapitalinstrumente und Gläubigerpapiere. Der erstmalige Ansatz von finanziellen Vermögenswerten erfolgt zum beizulegenden Zeitwert. Dabei werden bei allen finanziellen Vermögenswerten, die in Folgeperioden nicht erfolgswirksam zum beizulegenden Zeitwert bewertet werden, die dem Erwerb direkt zurechenbaren Transaktionskosten berücksichtigt. Die in der Bilanz angesetzten beizulegenden Zeitwerte entsprechen in der Regel den Marktpreisen der finanziellen Vermögenswerte.

## Forderungen aus Lieferungen und Leistungen sowie andere kurzfristige Forderungen

Forderungen werden zu fortgeführten Anschaffungskosten abzüglich Wertberichtigungen ausgewiesen.

Die Wertminderungen, welche in Form von Einzelwertberichtigungen vorgenommen werden, tragen dem Ausfallrisiko hinreichend Rechnung. Objektive Ausfälle führen zu einer Ausbuchung der betreffenden Forderung. Forderungen, die für sich gesehen unbedeutsam sind, sowie Forderungen mit einem ähnlichen Ausfallrisiko werden in Gruppen zusammengefasst und gemeinsam auf einen Wertberichtigungsbedarf anhand von Erfahrungswerten untersucht.



Wertberichtigungen von Forderungen aus Lieferungen und Leistungen werden teilweise unter Verwendung von Wertberichtigungskonten vorgenommen. Ob ein Ausfallrisiko über ein Wertberichtigungskonto oder direkt mittels Ausbuchung der Forderung erfasst wird, hängt davon ab, wie hoch die Wahrscheinlichkeit eines Forderungsausfalls geschätzt wird und wie verlässlich das Ausfallrisiko beurteilt werden kann.

Un- oder unterverzinsliche Forderungen mit einer erwarteten Laufzeit von mehr als einem Jahr werden abgezinst. Der Diskontierungsbetrag wird ratierlich bis zur Fälligkeit der Forderung im Zinsertrag vereinnahmt.

Der Konzern verkauft ausgewählte Forderungen aus Lieferungen und Leistungen sowie Wechsel auf revolvingender oder auf einmaliger Basis an nicht konsolidierungspflichtige Zweckgesellschaften (Special Purpose Entities) und andere Finanzinstitute. Auf diese Weise verkaufte Finanzaktiva werden zum Zeitpunkt des Verkaufs aus der Konzernbilanz ausgebucht, soweit im Wesentlichen alle Chancen und Risiken auf den Erwerber übertragen werden und die Durchleitung der mit diesen Finanzaktiva verbundenen Cash-Flows sichergestellt ist. Wenn im Wesentlichen alle Chancen und Risiken weder übertragen noch behalten werden, werden die Finanzaktiva zum Zeitpunkt des Verkaufs nur dann aus der Konzernbilanz ausgebucht, wenn sichergestellt ist, dass die aus den Finanzaktiva resultierenden Cash-Flows an den Erwerber durchgeleitet werden und der Erwerber die Kontrolle über die Finanzaktiva erhalten hat. Soweit im Wesentlichen alle Chancen und Risiken beim Konzern verbleiben, werden die Finanzaktiva als Sicherung einer passivierten Verbindlichkeit weiterhin in der Bilanz ausgewiesen.

### **Zahlungsmittel und Zahlungsmitteläquivalente**

Zahlungsmittel und Zahlungsmitteläquivalente umfassen Barmittel und Sichteinlagen sowie finanzielle Vermögenswerte, die jederzeit in Zahlungsmittel umgewandelt werden können und nur geringen Wertschwankungen unterliegen; sie sind zu fortgeführten Anschaffungskosten bewertet.

### **Zu Handelszwecken gehaltene finanzielle Vermögenswerte**

Derivative Finanzinstrumente, die nicht in eine wirksame Sicherungsbeziehung gemäß IAS 39 eingebunden sind, sind zwingend dieser Kategorie zuzuordnen, sofern der beizulegende Zeitwert zum Stichtag positiv ist. Ein Gewinn oder Verlust aus der Änderung des beizulegenden Zeitwertes wird ergebniswirksam erfasst.

### **Zur Veräußerung verfügbare finanzielle Vermögenswerte**

Zur Veräußerung verfügbare finanzielle Vermögenswerte sind jene nicht derivativen finanziellen Vermögenswerte, die nicht in eine der vorstehend beschriebenen Kategorien (Forderungen aus Lieferungen

und Leistungen sowie andere kurzfristige Forderungen, Zahlungsmittel und Zahlungsmitteläquivalente sowie zu Handelszwecken gehaltene finanzielle Vermögenswerte) eingeordnet sind. Diese Kategorie enthält im Wesentlichen Eigenkapitalinstrumente und Gläubigerpapiere, welche grundsätzlich zum beizulegenden Zeitwert bewertet werden. Ein Gewinn oder Verlust aus der Bewertung eines zur Veräußerung verfügbaren finanziellen Vermögenswertes wird direkt im Eigenkapital erfasst, mit Ausnahme von Wertberichtigungen und Effekten aus der Währungsumrechnung. Bei Abgang der finanziellen Vermögenswerte werden die bis dahin direkt im Eigenkapital berücksichtigten kumulierten Gewinne oder Verluste in der Gewinn- und Verlustrechnung der laufenden Periode erfasst. Lässt sich für nicht börsennotierte Eigenkapitalinstrumente der Zeitwert nicht hinreichend verlässlich ermitteln, werden diese zu Anschaffungskosten bewertet.

### **Erfolgswirksam zum beizulegenden Zeitwert bewertete finanzielle Vermögenswerte**

Der Konzern macht von dem Wahlrecht, finanzielle Vermögenswerte beim erstmaligen Ansatz in diese Kategorie einzustufen, keinen Gebrauch.

### **Wertminderung finanzieller Vermögenswerte**

Zu jedem Bilanzstichtag werden die Buchwerte der finanziellen Vermögenswerte, die nicht erfolgswirksam zum beizulegenden Zeitwert bewertet werden, daraufhin untersucht, ob objektive Hinweise darauf schließen lassen, dass eine Wertminderung vorliegt. Objektive Hinweise können z.B. erhebliche finanzielle Schwierigkeiten des Schuldners, der Wegfall eines aktiven Marktes sowie signifikante Änderungen des technologischen, marktbezogenen, wirtschaftlichen oder rechtlichen Umfeldes sein. Bei Eigenkapitalinstrumenten ist eine signifikante oder länger anhaltende Abnahme des beizulegenden Zeitwertes ein objektiver Hinweis auf eine Wertminderung.

Die Höhe der Wertberichtigung auf einen finanziellen Vermögenswert, der zu fortgeführten Anschaffungskosten bilanziert wird, ergibt sich als Differenz zwischen dem Buchwert und dem Barwert der erwarteten künftigen Cash-Flows, abgezinst mit dem ursprünglichen Effektivzinssatz des finanziellen Vermögenswertes. Der Wertminderungsaufwand wird erfolgswirksam erfasst.

Verringert sich die Höhe der Wertberichtigung in Folgeperioden auf Grund von Ereignissen, die objektiv nach dem Zeitpunkt der Erfassung der Wertberichtigung eingetreten sind, wird die Wertminderung in entsprechendem Umfang erfolgswirksam zurückgenommen.

Wurde der Rückgang des beizulegenden Zeitwertes eines zur Veräußerung verfügbaren finanziellen Vermögenswertes bisher direkt im Eigenkapital erfasst, werden diese ermittelten Wertminderungen aus dem Eigenkapital ergebniswirksam ausgebucht, sobald ein



objektiver Hinweis auf eine Wertminderung besteht. Die Höhe der Wertminderung entspricht der Differenz zwischen den Anschaffungskosten (abzüglich etwaiger Tilgungen und Amortisationen) und dem aktuellen beizulegenden Zeitwert, abzüglich etwaiger, bereits früher ergebniswirksam erfasster Wertberichtigungen des finanziellen Vermögenswertes. Ergebniswirksam erfasste Wertberichtigungen für Eigenkapitalinstrumente, die als zur Veräußerung verfügbar eingestuft sind, werden nicht erfolgswirksam, sondern nur über das Eigenkapital rückgängig gemacht. Wertaufholungen bei Fremdkapitalinstrumenten, die objektiv nach dem Zeitpunkt der Erfassung der Wertberichtigung eingetreten sind, werden erfolgswirksam erfasst.

### Finanzielle Verbindlichkeiten

Finanzielle Verbindlichkeiten begründen eine Verpflichtung, die in Zahlungsmitteln oder einem anderen finanziellen Vermögenswert zu begleichen ist. Hierunter fallen insbesondere Verbindlichkeiten aus Lieferungen und Leistungen, derivative finanzielle Verbindlichkeiten sowie die Bestandteile der Finanzschulden, im Wesentlichen Anleihen und sonstige verbrieftete Verbindlichkeiten, Verbindlichkeiten gegenüber Kreditinstituten und Verbindlichkeiten aus Finanzierungsleasingverhältnissen. Der erstmalige Ansatz von finanziellen Verbindlichkeiten erfolgt zum beizulegenden Zeitwert. Dabei werden bei allen finanziellen Verbindlichkeiten, die in Folgeperioden nicht erfolgswirksam zum beizulegenden Zeitwert bewertet werden, die dem Erwerb direkt zurechenbaren Transaktionskosten berücksichtigt.

### Verbindlichkeiten aus Lieferungen und Leistungen sowie sonstige originäre finanzielle Verbindlichkeiten

Verbindlichkeiten aus Lieferungen und Leistungen sowie sonstige originäre finanzielle Verbindlichkeiten werden grundsätzlich unter Anwendung der Effektivzinsmethode zu fortgeführten Anschaffungskosten angesetzt. Bei Verbindlichkeiten gegenüber Kreditinstituten werden die Finanzierungskosten einschließlich Agio, welches im Rahmen von Tilgungen oder Rückzahlungen zu erstatten ist, periodisch abgegrenzt und erhöhen den Buchwert der Verbindlichkeit, soweit sie nicht bereits in der Periode des Anfalls bezahlt wurden.

### Erfolgswirksam zum beizulegenden Zeitwert bewertete finanzielle Verbindlichkeiten

Der Konzern macht von dem Wahlrecht, finanzielle Verbindlichkeiten beim erstmaligen Ansatz in diese Kategorie einzustufen, keinen Gebrauch.

### Zu Handelszwecken gehaltene finanzielle Verbindlichkeiten

Derivative Finanzinstrumente, die nicht in eine wirksame Sicherungsbeziehung gemäß IAS 39 eingebunden sind, sind zwingend als „zu Handelszwecken gehalten“ einzustufen und damit erfolgswirksam mit

dem beizulegenden Zeitwert zu erfassen. Sind die beizulegenden Zeitwerte negativ, erfolgt ein Ausweis als „zu Handelszwecken gehaltene finanzielle Verbindlichkeiten“.

### Derivative Finanzinstrumente

Der Konzern setzt grundsätzlich derivative Finanzinstrumente ein, um Risiken aus Fremdwährungs-, Zins- und Rohstoffpreisänderungen entgegenzuwirken, die im Rahmen der laufenden Geschäftstätigkeit sowie im Rahmen von Investitions- und Finanztransaktionen entstehen können. Derivative Finanzinstrumente werden grundsätzlich zur Absicherung bestehender oder geplanter Grundgeschäfte eingesetzt. Solche derivative Finanzinstrumente und so genannte eingebettete derivative Finanzinstrumente, die integraler Bestandteil von bestimmten Verträgen sind und gesondert ausgewiesen werden müssen, werden sowohl bei erstmaliger Bilanzierung als auch in Folgeperioden ergebniswirksam zum beizulegenden Zeitwert bewertet. Gewinne oder Verluste aus Zeitertschwankungen werden sofort ergebniswirksam erfasst.

Wenn derivative Finanzinstrumente zur Absicherung von Risiken aus zukünftigen Zahlungsströmen und zur Sicherung von Bilanzposten eingesetzt werden, ermöglicht IAS 39 bei Vorliegen bestimmter Voraussetzungen die Anwendung der Spezialvorschriften zum Hedge Accounting. Hierdurch kann die Volatilität in der Gewinn- und Verlustrechnung reduziert werden. Es wird nach der Art des abgesicherten Grundgeschäftes zwischen einem Fair-Value-Hedge, einem Cash-Flow-Hedge und einem Hedge of a Net Investment in a Foreign Operation unterschieden.

Bei einem Fair-Value-Hedge, der der Absicherung von bilanzierten Vermögenswerten und Verbindlichkeiten oder nicht bilanzierten festen vertraglichen Verpflichtungen dient, wird das Sicherungsinstrument zum beizulegenden Zeitwert angesetzt und diesbezügliche Zeitwertänderungen werden sofort ergebniswirksam erfasst. Änderungen der beizulegenden Zeitwerte der abgesicherten Vermögenswerte, Verbindlichkeiten oder festen vertraglichen Verpflichtungen, die aus dem abgesicherten Risiko resultieren, werden ebenso ergebniswirksam erfasst. Im Falle eines perfekten Hedge gleichen sich die ergebniswirksam erfassten Zeitertschwankungen des Grund- und des Sicherungsgeschäfts nahezu aus. Wird der Vermögenswert oder die Verbindlichkeit nach den allgemeinen Bilanzierungsvorschriften zu fortgeführten Anschaffungskosten bilanziert, ist der Buchwert um die kumulierten Änderungen des beizulegenden Zeitwertes, die aus dem abgesicherten Risiko resultieren, anzupassen. Wird jedoch das Grundgeschäft (z.B. zur Veräußerung verfügbare Wertpapiere) zum beizulegenden Zeitwert bilanziert, ohne nach den allgemeinen Bilanzierungsvorschriften die Gewinn- und Verlustrechnung zu berühren, werden die Zeitwertänderungen, die aus dem abgesicherten Risiko resultieren, entgegen den allgemeinen Vorschriften ergebniswirksam erfasst.



Bei einem Cash-Flow-Hedge werden künftige Zahlungsstromschwankungen aus in der Bilanz angesetzten Vermögenswerten und Verbindlichkeiten, aus erwarteten mit hoher Wahrscheinlichkeit eintretenden künftigen Transaktionen oder aus Währungsrisiken einer festen vertraglichen Verpflichtung abgesichert. Der effektive Teil der Zeitwertschwankungen wird ergebnisneutral sofort innerhalb des Eigenkapitals ausgewiesen. Die Umgliederung aus dem Eigenkapital in die Konzern-Gewinn- und Verlustrechnung erfolgt in der Periode, in der das abgesicherte Grundgeschäft ergebniswirksam wird. Sofern die Absicherung später in dem Ansatz eines nicht finanziellen Vermögenswertes (z.B. Sachanlagen oder Vorräte) resultiert, verändern zu dessen Zugangszeitpunkt die bislang im Eigenkapital erfassten Zeitwertschwankungen den Wertansatz des nicht finanziellen Vermögenswertes. Der aus der Bestimmung der Effektivität des Sicherungszusammenhangs aus Grund- und Sicherungsgeschäft verbleibende ineffektive Teil des Derivates sowie Anpassungen auf Grund von Zinseffekten werden sofort in der Konzern-Gewinn- und Verlustrechnung ausgewiesen. Bei Währungsrisiken wird für die Beurteilung der Effektivität die Wertänderung auf Grund von Kassakursänderungen als gesichertes Risiko einbezogen und die Zinskomponente außen vorgelassen.

Wenn das Sicherungsinstrument ausläuft, verkauft, beendet oder ausgeübt wird oder der Sicherungszusammenhang nicht mehr besteht, aber trotzdem erwartet wird, dass das geplante Grundgeschäft eintritt, verbleiben sämtliche bis dahin aus diesem Sicherungsgeschäft aufgelaufenen, nicht realisierten Gewinne oder Verluste innerhalb des Eigenkapitals und werden gemäß obiger Ausführungen ergebniswirksam, wenn das abgesicherte Grundgeschäft ergebniswirksam wird. Falls der Eintritt des ursprünglich abgesicherten Grundgeschäfts nicht mehr erwartet wird, werden die bis dahin innerhalb des Eigenkapitals ausgewiesenen kumulierten, nicht realisierten Gewinne oder Verluste sofort in der Konzern-Gewinn- und Verlustrechnung erfasst.

Um Risiken aus Fremdwährungs-, Zins- und Rohstoffpreisänderungen abzusichern, wendet der Konzern überwiegend Cash-Flow-Hedges an. Zusätzlich führt das Unternehmen auch Sicherungsmaßnahmen gemäß den Grundsätzen des Risikomanagements durch, welche ökonomisch zur Sicherung bestehender Risiken beitragen, jedoch nicht die strengen Anforderungen des IAS 39 für Hedge Accounting erfüllen. Für Währungsderivate, die zur Absicherung von Währungsrisiken aus monetären Bilanzpositionen abgeschlossen wurden, wendet der Konzern kein Hedge Accounting an. Die ergebniswirksam erfassten Effekte aus der Umrechnung der Bilanzpositionen stehen so den ebenfalls ergebniswirksam zu erfassenden Zeitwertschwankungen der Derivate gegenüber.

Die Sicherung einer Nettoinvestition in eine ausländische Einheit durch einen Hedge of a Net Investment in a Foreign Operation wird derzeit im Konzern nicht angewendet.

Weitere Ausführungen zu den derivativen Finanzinstrumenten enthält Anhang-Nr. 22.

### Latente Steuern

Latente Steuern werden nach der Bilanz-Ansatz-Methode auf zeitlich befristete Differenzen zwischen Wertansätzen in der Handelsbilanz und in der Steuerbilanz sowie auf steuerliche Verlustvorträge und für anrechenbare Steuern angesetzt. Auf diese Weise ermittelte Differenzen werden grundsätzlich immer berücksichtigt, wenn sie zu passiven latenten Steuern führen. Aktive latente Steuern werden nur dann berücksichtigt, wenn es wahrscheinlich ist, dass die entsprechenden Steuervorteile auch realisiert werden. Aktive und passive latente Steuern werden auch auf temporäre Differenzen, die im Rahmen von Unternehmenserwerben entstehen, angesetzt, mit der Ausnahme von temporären Differenzen auf Firmenwerte, sofern diese steuerlich unberücksichtigt bleiben.

Zur Berechnung latenter Steuern werden die Steuersätze zukünftiger Jahre herangezogen, soweit sie bereits gesetzlich festgeschrieben sind bzw. der Gesetzgebungsprozess im Wesentlichen abgeschlossen ist. Veränderungen der latenten Steuern in der Bilanz führen grundsätzlich zu latentem Steueraufwand bzw. -ertrag. Soweit Sachverhalte, die eine Veränderung der latenten Steuern nach sich ziehen, direkt gegen das Eigenkapital gebucht werden, wird auch die Veränderung der latenten Steuern direkt im Eigenkapital berücksichtigt.

### Kumuliertes sonstiges Ergebnis

In dieser Position werden erfolgsneutrale Veränderungen des Eigenkapitals ausgewiesen, soweit sie nicht auf Kapitaltransaktionen mit Anteilseignern (z.B. Kapitalerhöhungen oder Ausschüttungen) beruhen. Hierzu zählen der Unterschiedsbetrag aus der Währungsumrechnung, aufgelaufene versicherungsmathematische Gewinne und Verluste aus der Bewertung von Pensionen und ähnlichen Verpflichtungen einschließlich Effekte aus „asset ceiling“ sowie unrealisierte Gewinne und Verluste aus der Zeitbewertung von zur Veräußerung verfügbaren Vermögenswerten und von derivativen Finanzinstrumenten.

### Rückstellungen für Pensionen und ähnliche Verpflichtungen

Für leistungsorientierte Pensionspläne zu bildende Pensionsrückstellungen sowie Rückstellungen für pensionsähnliche Verpflichtungen sind zum Bilanzstichtag nach dem versicherungsmathema-



tischen Anwartschaftsbarwertverfahren (projected unit credit method) bewertet. Quartalsweise erfolgt eine Neubewertung der Rückstellungen für Pensionen und Gesundheitsfürsorgeverpflichtungen auf Basis aktualisierter Zinssätze und Marktwerte des Planvermögens.

Alle bis zum Stichtag des Übergangs auf die Bilanzierung nach den Vorschriften der IFRS, dem 01. Oktober 2004, aufgelaufenen versicherungsmathematischen Gewinne und Verluste wurden sofort innerhalb des Eigenkapitals erfasst. Alle nach dem 01. Oktober 2004 anfallenden versicherungsmathematischen Gewinne und Verluste sowie Gewinne und Verluste aus „asset ceiling“ werden ebenfalls sofort innerhalb des Eigenkapitals erfasst und in der Konzern-Gesamtergebnisrechnung (statement of comprehensive income) dargestellt.

Soweit ein zur Refinanzierung von Pensionsverpflichtungen und ähnlichen Verpflichtungen aufgebautes Fondsvermögen die Verpflichtungen übersteigt, ist die Aktivierung des Überhangs begrenzt. Soweit im Zusammenhang mit Fondsvermögen Zahlungsverpflichtungen auf Grund von Mindestdotierungsvorschriften für bereits erdiente Leistungen bestehen, kann dies auch zum Ansatz einer zusätzlichen Rückstellung führen, wenn der wirtschaftliche Nutzen eines sich unter Berücksichtigung der noch zu leistenden Mindestdotierungen ergebenden Finanzierungsüberhangs für das Unternehmen begrenzt ist. Determinanten für die Begrenzung sind noch unberücksichtigter Dienstzeitaufwand aus rückwirkenden Planänderungen sowie der Barwert von künftigen Rückerstattungen aus dem Plan oder von Minderungen zukünftiger Beitragszahlungen (asset ceiling).

Der Dienstzeitaufwand für Pensionen und ähnliche Verpflichtungen wird als Aufwand innerhalb des betrieblichen Ergebnisses ausgewiesen. Der im Netto-Pensionsaufwand enthaltene Zinsaufwand und der erwartete Kapitalertrag des Fondsvermögens werden im Finanzergebnis der Konzern-Gewinn- und Verlustrechnung berücksichtigt. Soweit Planverbesserungen zugesagt werden, wird noch unberücksichtigter Dienstzeitaufwand aus rückwirkenden Planänderungen linear über den durchschnittlichen Zeitraum bis zur Unverfallbarkeit der Anwartschaften verteilt. Im Falle einer unmittelbaren Unverfallbarkeit der Anwartschaften erfolgt eine sofortige ergebniswirksame Erfassung.

Verpflichtungen des Konzerns aus beitragsorientierten Versorgungsplänen werden ergebniswirksam innerhalb des betrieblichen Ergebnisses erfasst.

Der Konzern verfügt auch über Pensionspläne, die gemeinschaftlich mit nicht verbundenen Unternehmen unterhalten werden (multi-employer plans). Dabei handelt es sich im Grundsatz sowohl um leistungs- als auch um beitragsorientierte Versorgungspläne.

Soweit im Zusammenhang mit gemeinschaftlich unterhaltenen leistungsorientierten Versorgungsplänen die erforderlichen Informationen zur Verfügung stehen, werden diese Pläne wie jeder andere leistungsorientierte Plan bilanziert, andernfalls wie beitragsorientierte Pläne.

### Sonstige Rückstellungen

Rückstellungen werden gebildet, wenn der Konzern aus einem Ereignis der Vergangenheit eine gegenwärtige Verpflichtung hat und diese Verpflichtung wahrscheinlich zu einem Abfluss von Ressourcen mit wirtschaftlichem Nutzen führen wird, deren Höhe verlässlich geschätzt werden kann. Die Rückstellungshöhe entspricht der bestmöglichen Schätzung des Erfüllungsbetrags der gegenwärtigen Verpflichtung zum Bilanzstichtag, wobei erwartete Erstattungen Dritter nicht saldiert, sondern als separater Vermögenswert angesetzt werden, sofern die Realisation so gut wie sicher ist. Ist der Zinseffekt wesentlich, wird die Rückstellung mit dem risikoadäquaten Marktzins abgezinst.

Rückstellungen für Gewährleistungen werden zum Zeitpunkt des Verkaufs der betreffenden Waren oder der Erbringung der entsprechenden Dienstleistungen gebildet. Die Höhe der Rückstellung basiert auf der historischen Entwicklung von Gewährleistungen sowie einer Betrachtung aller zukünftig möglichen, mit ihren Eintrittswahrscheinlichkeiten gewichteten Gewährleistungsfälle.

Rückstellungen für Restrukturierungsmaßnahmen werden gebildet, soweit ein detaillierter, formaler Restrukturierungsplan erstellt und dieser den betroffenen Parteien mitgeteilt worden ist.

Rückstellungen für drohende Verluste aus ungünstigen Verträgen werden gebildet, wenn der aus dem Vertrag resultierende erwartete wirtschaftliche Nutzen geringer ist als die zur Vertragserfüllung unvermeidbaren Kosten.

### Aktienbasierte Vergütung

Der Konzern verfügt über Incentivepläne, in deren Rahmen ausgewählten Führungskräften Wertrechte gewährt werden. Der beizulegende Zeitwert dieser Rechte wird zum Zeitpunkt der Gewährung (grant date) berechnet und als Aufwand linear über den Erdienungszeitraum (vesting period) verteilt sowie eine entsprechende Rückstellung ausgewiesen. Weiterhin wird den Mitgliedern des Vorstands der ThyssenKrupp AG ein Teil der variablen Vergütung für das abgelaufene Geschäftsjahr in Wertsteigerungsrechten gewährt. Die Rückstellungen für beide Vergütungsformen werden zu jedem Bilanzstichtag und zum Zeitpunkt der Auszahlung neu bewertet. Veränderungen des beizulegenden Zeitwertes der Rückstellung werden innerhalb des betrieblichen Ergebnisses berücksichtigt.



Darüber hinaus gewährt der Konzern im Rahmen eines Mitarbeiteraktienprogramms ausgewählten Führungskräften das Recht, Aktien mit einem Rabatt zu erwerben. Der Aufwand dieser aktienbasierten Vergütung wird auf Basis der Schätzung des Rabatts in Bezug auf die Aktien linear über den Zeitraum von der Bekanntmachung des Angebots bis zu dem Zeitpunkt erfasst, zu dem der Begünstigte das Mitarbeiteraktienprogramm annimmt.

Wir verweisen hierzu auch auf die Ausführungen unter der Anhang-Nr. 14.

### Segmentberichterstattung

Die Segmentberichterstattung des ThyssenKrupp Konzerns ist gemäß dem sogenannten „Management Approach“ an der internen Organisations- und Berichtsstruktur ausgerichtet. Die der Ermittlung der internen Steuerungsgrößen zu Grunde liegenden Daten werden aus dem nach IFRS aufgestellten Konzernabschluss abgeleitet.

### Beabsichtigte Veräußerungen (disposal groups) und nicht fortgeführte Aktivitäten (discontinued operations)

Der Konzern weist langfristige Vermögenswerte als Disposal Group aus, wenn diese in einer Gruppe zusammen mit anderen Vermögenswerten und Verbindlichkeiten in einer Transaktion verkauft werden sollen und diese insgesamt die in IFRS 5 „Non-current Assets held for Sale and Discontinued Operations“ definierten Kriterien erfüllen. Die Vermögenswerte und Verbindlichkeiten der Disposal Group werden in der Bilanz gesondert in den Zeilen „Zur Veräußerung vorgesehene Vermögenswerte“ bzw. „Verbindlichkeiten in Verbindung mit zur Veräußerung vorgesehenen Vermögenswerten“ ausgewiesen. Die Aufwendungen und Umsätze einer Disposal Group sind bis zur Veräußerung im Ergebnis aus fortgeführten Aktivitäten enthalten, es sei denn, die Disposal Group qualifiziert sich für die Berichterstattung als eine „Nicht fortgeführte Aktivität“ (discontinued operation). Der Konzern weist die Ergebnisse einer Disposal Group, die die Voraussetzungen für eine sogenannte Komponente des Konzerns (component of the group) erfüllt, als nicht fortgeführte Aktivitäten aus, wenn diese einen wesentlichen Geschäftszweig repräsentiert oder sämtliche Aktivitäten einer geografischen Region beinhaltet. Ergebnisse aus nicht fortgeführten Aktivitäten werden in der Periode berücksichtigt, in der sie anfallen, und gesondert in der Gewinn- und Verlustrechnung als „Nicht fortgeführte Aktivitäten (nach Steuern)“ ausgewiesen. Alle Gewinn- und Verlustrechnungen der Vorperioden werden entsprechend angepasst, indem die Ergebnisse der Komponente des Konzerns in den nicht fortgeführten Aktivitäten ausgewiesen werden.

Bei erstmaliger Klassifizierung als zur Veräußerung gehalten werden langfristige Vermögenswerte zum niedrigeren Wert aus Buchwert und beizulegendem Zeitwert abzüglich Veräußerungskosten

angesetzt, eine planmäßige Abschreibung wird nicht mehr vorgenommen. Eine Veräußerungsgruppe wird zunächst nach den für sie einschlägigen IFRS-Standards bewertet und danach wird der sich daraus ergebende Buchwert der Gruppe dem Nettozeitwert gegenübergestellt, um den niedrigeren anzusetzenden Wert zu bestimmen. Wertminderungen auf Grund der erstmaligen Klassifizierung als zur Veräußerung gehalten werden ebenso wie spätere Wertminderungsaufwendungen und Wertaufholungen in der Gewinn- und Verlustrechnung erfasst.

### Abschlussgliederung

Einzelne Posten in der Gewinn- und Verlustrechnung und in der Bilanz sind zusammengefasst. Sie werden im Anhang gesondert ausgewiesen. Der Vorperiodenausweis wurde an den Ausweis der Berichtsperiode angepasst.

In der Regel klassifiziert der Konzern Vermögenswerte und Verbindlichkeiten als kurzfristig, wenn diese voraussichtlich innerhalb von zwölf Monaten nach dem Bilanzstichtag realisiert oder ausgeglichen werden. Konzernunternehmen, deren normaler Geschäftszyklus mehr als zwölf Monate umfasst, weisen Vermögenswerte und Verbindlichkeiten als kurzfristig aus, wenn diese innerhalb des normalen Geschäftszyklus realisiert oder ausgeglichen werden.

### Schätzungen

Zur Erstellung des Konzernabschlusses muss der Vorstand Beurteilungen und Schätzungen vornehmen sowie Annahmen treffen, die die Anwendung von Rechnungslegungsgrundsätzen im Konzern und den Ausweis der Vermögenswerte und Verbindlichkeiten sowie der Erträge und Aufwendungen beeinflussen. Die tatsächlichen Beträge können von diesen Schätzungen abweichen.

Die Schätzungen und die zu Grunde liegenden Annahmen werden fortlaufend überprüft. Anpassungen bezüglich der für die Rechnungslegung relevanten Schätzungen werden in der Periode der Änderung berücksichtigt, sofern die Änderung nur diese Periode betrifft. Eine Änderung wird in der Periode der Änderung und in späteren Perioden berücksichtigt, sofern die Änderung sowohl die Berichtsperiode als auch spätere Perioden betrifft.

Schätzungen und Ermessensausübungen des Vorstands in der Anwendung der IFRS, die einen wesentlichen Effekt auf den Konzernabschluss haben, werden unter Anhang-Nr. 25 dargestellt.

### Erstmalig angewendete Rechnungslegungsvorschriften

Im Geschäftsjahr 2009/2010 hat ThyssenKrupp die nachfolgenden Standards, Interpretationen und Änderungen zu bestehenden Standards erstmalig angewendet:



Im September 2007 hat das IASB eine überarbeitete Version des Standards IAS 1 „Presentation of Financial Statements“ herausgegeben, die den Anwendern die Analyse und den Vergleich von Abschlüssen erleichtern soll. Der geänderte Standard ist verpflichtend anzuwenden auf Geschäftsjahre, die am oder nach dem 01. Januar 2009 beginnen. Die erstmalige Anwendung des Standards hat wesentliche Auswirkungen auf die Darstellung des Konzernabschlusses.

Im März 2007 hat das IASB den geänderten Standard IAS 23 „Borrowing Costs“ herausgegeben. Danach sind Fremdkapitalkosten, die direkt dem Erwerb, dem Bau oder der Herstellung eines qualifizierten Vermögenswertes zugeordnet werden können, zu aktivieren. Die bislang bestehende Möglichkeit zur sofortigen aufwandswirksamen Erfassung von Fremdkapitalkosten wird abgeschafft. Der geänderte Standard ist verpflichtend anzuwenden auf Geschäftsjahre, die am oder nach dem 01. Januar 2009 beginnen. Die erstmalige Anwendung des geänderten Standards hat keine Auswirkungen auf den Konzernabschluss, da bereits vor der Änderung die einem qualifizierten Vermögenswert direkt zurechenbaren Fremdkapitalkosten als Teil der Herstellungskosten aktiviert wurden.

Im Februar 2008 hat das IASB einen Änderungsstandard zu „IAS 32 Financial Instruments: Presentation und IAS 1 Presentation of Financial Statements – Puttable Financial Instruments and Obligations Arising on Liquidation“ veröffentlicht. Die Änderungen betreffen im Wesentlichen die Klassifizierung bestimmter Arten von Finanzinstrumenten als Eigen- oder Fremdkapital. Darüber hinaus werden zusätzliche Anhangangaben für die von der Regelung betroffenen Finanzinstrumente gefordert. Die Änderungen sind verpflichtend anzuwenden auf Geschäftsjahre, die am oder nach dem 01. Januar 2009 beginnen. Der Konzern geht derzeit nicht davon aus, dass die Anwendung der überarbeiteten Fassungen einen wesentlichen Einfluss auf die Darstellung der Abschlüsse hat.

Im Juli 2008 hat das IASB eine Ergänzung zu IAS 39 „Eligible Hedged Items – Amendment to IAS 39 Financial Instruments: Recognition and Measurement“ veröffentlicht. Die Ergänzung stellt klar, wie die Grundprinzipien des Hedge Accounting in zwei speziellen Situationen – der Designation von Inflationsrisiken als Grundgeschäft und der Designation eines einseitigen Risikos in einem Grundgeschäft anzuwenden sind. Die Ergänzung ist verpflichtend rückwirkend anzuwenden auf Geschäftsjahre, die am oder nach dem 01. Juli 2009 beginnen. Der Konzern geht derzeit nicht davon aus, dass die Anwendung der überarbeiteten Fassung einen wesentlichen Einfluss auf die Darstellung der Abschlüsse hat.

Im März 2009 hat das IASB mit der Herausgabe von „Embedded Derivatives“ Änderungen zu IFRIC 9 „Reassessment of Embedded Derivatives“ und IAS 39 „Financial Instruments“ veröffentlicht. Die Änderungen dienen der Klarstellung der Bilanzierung von einge-

betteten Derivaten bei Umklassifizierungen von Finanzinstrumenten. Die Änderungen sind verpflichtend rückwirkend anzuwenden auf Geschäftsjahre, die am oder nach dem 30. Juni 2009 beginnen. Der Konzern geht derzeit nicht davon aus, dass die Anwendung der überarbeiteten Fassung einen wesentlichen Einfluss auf die Darstellung der Abschlüsse hat.

Im Januar 2008 hat das IASB eine Änderung von IFRS 2 „Share-based Payment“ veröffentlicht. Durch die Änderung wird klargestellt, dass Ausübungsbedingungen nur Dienstzeitbedingungen (service conditions) und Leistungsbedingungen (performance conditions) sind. Außerdem wird präzisiert, dass die Bilanzierungsregeln zur vorzeitigen Planbeendigung unabhängig davon gelten, ob der Plan vom Unternehmen selbst oder einer anderen Partei beendet wird. Der geänderte Standard ist verpflichtend anzuwenden auf Geschäftsjahre, die am oder nach dem 01. Januar 2009 beginnen. Der Konzern geht derzeit nicht davon aus, dass die Anwendung der überarbeiteten Fassung einen wesentlichen Einfluss auf die Darstellung der Abschlüsse hat.

Im Januar 2008 hat das IASB auch die überarbeiteten Fassungen des IFRS 3 „Business Combinations“ und IAS 27 „Consolidated and Separate Financial Statements“ veröffentlicht. Ein wesentlicher Änderungspunkt hinsichtlich IFRS 3 ist die Bilanzierung von Erwerben von weniger als 100 % der Anteile eines Unternehmens. Es wird das Wahlrecht eingeführt, den Goodwill aus einem Erwerb nach der „Full Goodwill Method“ voll aufzudecken, d.h. auch in Höhe des Anteils, der den Minderheiten zuzurechnen ist. Außerdem sind die Anschaffungsnebenkosten des Erwerbs in voller Höhe als Aufwand zu erfassen. Darüber hinaus sieht IAS 27 vor, den Erwerb oder die Veräußerung von Anteilen ohne Kontrollverlust als Transaktion zwischen Anteilseignern erfolgsneutral abzubilden. Im Falle einer Anteilsveräußerung mit Kontrollverlust sind die verbleibenden Anteile zum beizulegenden Zeitwert zu bilanzieren. Entstehende Differenzen zu dem bisherigen Buchwert sind erfolgswirksam zu erfassen. Die geänderten Standards sind verpflichtend anzuwenden auf Unternehmenszusammenschlüsse in Geschäftsjahren, die am oder nach dem 01. Juli 2009 beginnen. Die Anwendung der geänderten Standards hat wesentliche Auswirkungen auf die Darstellung des Konzernabschlusses.

Im März 2009 hat das IASB eine Änderung zu IFRS 7 „Financial Instruments: Disclosures“ mit dem Titel „Improving Disclosures about Financial Instruments“ veröffentlicht. Die Änderungen sehen erweiterte Anhangangaben zur Bewertung von Finanzinstrumenten zum beizulegenden Zeitwert und zu den Liquiditätsrisiken vor. Der geänderte Standard ist verpflichtend anzuwenden auf Geschäftsjahre, die am oder nach dem 01. Januar 2009 beginnen. Im ersten Jahr der Anwendung sind keine Vergleichsangaben erforderlich. Die erstmalige Anwendung der geänderten Fassung bei ThyssenKrupp führt zu erweiterten Anhangangaben.



Im Juli 2007 hat das IFRIC die Interpretation IFRIC 14 „IAS 19 – The Limit on a Defined Benefit Asset, Minimum Funding Requirements and their Interaction“ herausgegeben. Die Interpretation gibt Hinweise, wie die Begrenzung nach IAS 19 „Employee Benefits“ für einen Überschuss festzulegen ist, der als Vermögenswert angesetzt werden kann. Zudem wird erklärt, welche Auswirkungen sich auf die Bewertung von Vermögenswerten und Rückstellungen aus leistungsorientierten Plänen auf Grund einer gesetzlichen oder vertraglichen Verpflichtung zu einer Einzahlung von Mindestbeträgen ergeben. Dadurch wird sichergestellt, dass Unternehmen einen Planvermögensüberschuss als Vermögenswert konsistent bilanzieren. IFRIC 14 ist in der EU verpflichtend anzuwenden auf Geschäftsjahre, die am oder nach dem 01. Januar 2009 beginnen. Der Konzern geht derzeit nicht davon aus, dass die Anwendung der Interpretation einen wesentlichen Einfluss auf die Darstellung des Konzernabschlusses hat.

Im Mai 2008 hat das IASB den ersten Sammelstandard „Improvements to IFRSs“ zur Vornahme kleinerer Änderungen an den bestehenden IFRS-Standards veröffentlicht. Dieser Standard enthält in zwei Teilabschnitten die Änderungen von 20 IFRS-Standards. Der erste Teilabschnitt beinhaltet Änderungen, die Auswirkungen auf die Darstellung, den Ansatz oder die Bewertung haben können. Der zweite Teilabschnitt enthält Formulierungsänderungen oder redaktionelle Änderungen. Sofern im jeweiligen Standard nicht anders geregelt, sind die Änderungen anzuwenden auf Geschäftsjahre, die am oder nach dem 01. Januar 2009 beginnen. Der Konzern geht derzeit nicht davon aus, dass die Anwendung der überarbeiteten Fassungen einen wesentlichen Einfluss auf die Darstellung der Abschlüsse hat.

#### Neu herausgegebene Rechnungslegungsvorschriften

Im Geschäftsjahr 2009/2010 hat das IASB die nachfolgend dargestellten Standards, Interpretationen und Änderungen herausgegeben, deren Anwendung noch die Übernahme in EU-Recht („Endorsement“) erfordert:

Im November 2009 hat das IASB eine überarbeitete Fassung von IAS 24 „Related Party Disclosures“ veröffentlicht. Die Überarbeitung beinhaltet eine Vereinfachung der Anhangangabepflichten für Unternehmen, die Regierungen nahe stehend sind (sog. „government-related entities“) und eine Klarstellung der Definition nahe stehender Unternehmen und Personen. Der geänderte Standard ist verpflichtend anzuwenden auf Geschäftsjahre, die am oder nach dem 01. Januar 2011 beginnen; eine frühere Anwendung ist zulässig. Der Konzern geht derzeit nicht davon aus, dass die Anwendung der überarbeiteten Fassung, sofern sie von der EU in dieser Form übernommen wird, einen wesentlichen Einfluss auf die Darstellung der Abschlüsse haben wird.

Im November 2009 hat das IASB den neuen Standard IFRS 9 „Financial Instruments“ zur Klassifizierung und Bewertung von finanziellen Vermögenswerten veröffentlicht. Dieser Standard ist der erste Teil des dreiteiligen Projekts zur vollständigen Ablösung von IAS 39 „Financial Instruments: Recognition and Measurement“, das in 2010 abgeschlossen werden soll. Gemäß der Methodik von IFRS 9 sind finanzielle Vermögenswerte entweder zu fortgeführten Anschaffungskosten oder zum beizulegenden Zeitwert zu bewerten. Die Zuordnung zu einer der beiden Bewertungskategorien hängt davon ab, wie das Unternehmen seine Finanzinstrumente steuert (sog. Geschäftsmodell) und welche Produktmerkmale die einzelnen finanziellen Vermögenswerte haben. Der Standard ist verpflichtend anzuwenden auf Geschäftsjahre, die am oder nach dem 01. Januar 2013 beginnen; eine frühere Anwendung für Jahresabschlüsse zum 31. Dezember 2009 ist zulässig. Der Konzern kann derzeit noch nicht abschließend beurteilen, welche Auswirkungen die Erstanwendung des Standards haben wird, sofern der Standard von der EU in dieser Form übernommen wird.

Im November 2009 hat das IASB eine Änderung von IFRIC 14, der eine Interpretation des IAS 19 „Employee Benefits“ ist, mit dem Titel „Prepayments of a Minimum Funding Requirement“ veröffentlicht. Die Änderung ist in den seltenen Fällen relevant, in denen ein Unternehmen Mindestdotierungsverpflichtungen unterliegt und Beitragsvorauszahlungen leistet, um diese Mindestdotierungsverpflichtungen zu erfüllen. Die Änderung erlaubt dem Unternehmen in diesem Fall, den Vorteil einer solchen Vorauszahlung als Vermögenswert zu bilanzieren. Die Änderung der Interpretation ist verpflichtend anzuwenden auf Geschäftsjahre, die am oder nach dem 01. Januar 2011 beginnen; eine frühere Anwendung für Jahresabschlüsse zum 31. Dezember 2009 ist zulässig. Der Konzern geht derzeit nicht davon aus, dass die Anwendung der Interpretation, sofern sie von der EU in dieser Form übernommen wird, einen wesentlichen Einfluss auf die Darstellung der Abschlüsse haben wird.

Im November 2009 hat das IFRIC die Interpretation IFRIC 19 „Extinguishing Financial Liabilities with Equity Instruments“ veröffentlicht. Diese Interpretation stellt die Anforderungen klar, die IFRS hat, wenn ein Unternehmen die Bedingungen einer finanziellen Verbindlichkeit mit dem Gläubiger neu verhandelt und der Gläubiger dabei akzeptiert, dass die finanzielle Verbindlichkeit vollständig oder teilweise mit Aktien oder anderen Eigenkapitalinstrumenten des Unternehmens getilgt wird. Die Interpretation ist verpflichtend anzuwenden auf Geschäftsjahre, die am oder nach dem 01. Juli 2010 beginnen; eine frühere Anwendung ist zulässig. Der Konzern geht derzeit nicht davon aus, dass die Anwendung der Interpretation, sofern sie von der EU in dieser Form übernommen wird, einen wesentlichen Einfluss auf die Darstellung der Abschlüsse haben wird.



Im Mai 2010 hat das IASB im Rahmen des Annual Improvements Process-Projekts den dritten Sammelband „Improvements to IFRSs“ veröffentlicht. Hierdurch werden an sechs Standards und an einer Interpretation kleinere Änderungen vorgenommen. Soweit im Einzelfall nicht anders geregelt, sind die Änderungen anzuwenden auf Geschäftsjahre, die am oder nach dem 01. Januar 2011 beginnen; eine frühere Anwendung ist zulässig. Der Konzern geht derzeit nicht davon aus, dass die Anwendung der überarbeiteten Fassungen, sofern sie von der EU in dieser Form übernommen werden, einen wesentlichen Einfluss auf die Darstellung der Abschlüsse haben wird.

Im Oktober 2010 hat das IASB Änderungen zu IFRS 7 „Financial Instruments: Disclosures“ veröffentlicht. Durch diese Änderungen wird den Nutzern von Finanzberichten ein besserer Einblick in Transaktionen zur Übertragung von finanziellen Vermögenswerten gewährt. Die Änderungen sind anzuwenden auf Geschäftsjahre, die am oder nach dem 01. Juli 2011 beginnen; eine frühere Anwendung ist zulässig. Im ersten Jahr der Anwendung sind Vergleichsangaben nicht erforderlich. Der Konzern geht derzeit nicht davon aus, dass die Anwendung der Änderungen, sofern sie von der EU in dieser Form übernommen werden, einen wesentlichen Einfluss auf die Darstellung der Abschlüsse haben wird.

Im Oktober 2010 hat das IASB Vorschriften zur Bilanzierung finanzieller Verbindlichkeiten veröffentlicht, die den IFRS 9 „Financial Instruments“ ergänzen und die Phase zur Klassifizierung und Bewertung des IASB-Projekts zur Ablösung von IAS 39 „Financial Instruments: Recognition and Measurement“ abschließen. Nach den neuen Vorschriften hat ein Unternehmen, das für die Bilanzierung seiner Finanzverbindlichkeiten die Fair Value-Option gewählt hat, den Teil der Änderung des beizulegenden Zeitwerts, der aus der Änderung des eigenen Kreditrisikos resultiert, im sonstigen Ergebnis innerhalb des Eigenkapitals und nicht in der Gewinn- und Verlustrechnung zu erfassen. Die Ergänzung zu IFRS 9 ist auf Geschäftsjahre anzuwenden, die am oder nach dem 01. Januar 2013 beginnen. Eine frühere Anwendung ist nur zulässig, wenn gleichzeitig die in IFRS 9 für finanzielle Vermögenswerte enthaltenen Regelungen angewendet werden. Der Konzern geht derzeit nicht davon aus, dass die Anwendung der Ergänzung, sofern sie von der EU in dieser Form übernommen wird, einen wesentlichen Einfluss auf die Darstellung der Abschlüsse haben wird.

## 02 Erwerbe und Veräußerungen

### Geschäftsjahr 2009/2010

Im Geschäftsjahr 2009/2010 tätigte der Konzern Akquisitionen, die jede für sich genommen nicht wesentlich waren und die sich in Summe auf Basis der Werte zum jeweiligen Erwerbszeitpunkt wie folgt auf den Konzernabschluss auswirkten:

Mio €

|                                                                     | 2009/2010                      |                                |
|---------------------------------------------------------------------|--------------------------------|--------------------------------|
|                                                                     | Buchwerte zum Erwerbszeitpunkt | Zeitwerte zum Erwerbszeitpunkt |
|                                                                     | Anpassungen                    |                                |
| Firmenwert                                                          | 0                              | 10                             |
| Sonstige immaterielle Vermögenswerte                                | 2                              | 5                              |
| Sachanlagen                                                         | 19                             | 16                             |
| Aktive latente Steuern                                              | 0                              | 1                              |
| Vorräte                                                             | 6                              | 6                              |
| Forderungen aus Lieferungen und Leistungen                          | 10                             | 10                             |
| Zahlungsmittel und Zahlungsmitteläquivalente                        | 3                              | 3                              |
| <b>Insgesamt erworbene Vermögenswerte</b>                           | <b>40</b>                      | <b>51</b>                      |
| Passive latente Steuern                                             | 0                              | 1                              |
| Sonstige kurzfristige Rückstellungen                                | 1                              | 1                              |
| Kurzfristige Finanzschulden                                         | 19                             | 19                             |
| Verbindlichkeiten aus Lieferungen und Leistungen                    | 6                              | 6                              |
| Sonstige kurzfristige nicht finanzielle Verbindlichkeiten           | 3                              | 3                              |
| <b>Insgesamt übernommene Verbindlichkeiten</b>                      | <b>29</b>                      | <b>30</b>                      |
| <b>Erworbenes Reinvermögen</b>                                      | <b>11</b>                      | <b>21</b>                      |
| Nicht beherrschende Anteile                                         | 1                              | 1                              |
| <b>Kaufpreise</b>                                                   |                                | <b>20</b>                      |
| davon: durch Zahlungsmittel und Zahlungsmitteläquivalente beglichen |                                | 13                             |
| davon: durch Eigenkapitalinstrumente beglichen                      |                                | 7                              |



Darüber hinaus erfolgten im Rahmen der Portfoliobereinigung im Geschäftsjahr 2009/2010 die Verkäufe von ThyssenKrupp Industrieservice und von ThyssenKrupp Safway aus der Business Area Materials Services. Beide Bereiche wurden zum 30. September 2009 als Disposal Groups ausgewiesen, da zu diesem Zeitpunkt die Verkäufe eingeleitet waren; der Vollzug erfolgte Ende November 2009 bzw. Mitte Dezember 2009. Diese beiden Veräußerungen, die Veräußerung von HSY sowie weitere kleinere Verkäufe, die jeder für sich genommen nicht wesentlich waren, haben sich in Summe auf Basis der Werte zum jeweiligen Veräußerungszeitpunkt wie nachfolgend dargestellt auf den Konzernabschluss ausgewirkt:

| Mio €                                                               | 2009/2010  |
|---------------------------------------------------------------------|------------|
| Firmenwert                                                          | 97         |
| Sonstige immaterielle Vermögenswerte                                | 5          |
| Sachanlagen                                                         | 173        |
| Nach der Equity-Methode bilanzierte Beteiligungen                   | 1          |
| Sonstige langfristige finanzielle Vermögenswerte                    | 3          |
| Aktive latente Steuern                                              | 2          |
| Vorräte                                                             | 32         |
| Forderungen aus Lieferungen und Leistungen                          | 179        |
| Sonstige kurzfristige finanzielle Vermögenswerte                    | 10         |
| Sonstige kurzfristige nicht finanzielle Vermögenswerte              | 20         |
| Laufende Ertragsteueransprüche                                      | 6          |
| Zahlungsmittel und Zahlungsmitteläquivalente                        | 6          |
| <b>Insgesamt abgegebene Vermögenswerte</b>                          | <b>534</b> |
| Pensionsrückstellungen und ähnliche Verpflichtungen                 | 54         |
| Sonstige langfristige Rückstellungen                                | 23         |
| Passive latente Steuern                                             | 27         |
| Langfristige Finanzschulden                                         | 2          |
| Sonstige kurzfristige Rückstellungen                                | 45         |
| Laufende Ertragsteuerverbindlichkeiten                              | 15         |
| Kurzfristige Finanzschulden                                         | 45         |
| Verbindlichkeiten aus Lieferungen und Leistungen                    | 35         |
| Sonstige kurzfristige finanzielle Verbindlichkeiten                 | 142        |
| Sonstige kurzfristige nicht finanzielle Verbindlichkeiten           | 71         |
| <b>Insgesamt abgegebene Verbindlichkeiten</b>                       | <b>459</b> |
| <b>Abgehendes Reinvermögen</b>                                      | <b>75</b>  |
| Kumuliertes sonstiges Ergebnis                                      | 13         |
| Nicht beherrschende Anteile                                         | 1          |
| Gewinn/(Verlust) aus den Verkäufen                                  | 223        |
| <b>Verkaufspreis</b>                                                | <b>310</b> |
| davon: durch Zahlungsmittel und Zahlungsmitteläquivalente beglichen | 310        |

### Geschäftsjahr 2008/2009

Im Geschäftsjahr 2008/2009 tätigte der Konzern ebenfalls Akquisitionen, die jede für sich genommen nicht wesentlich waren und die sich in Summe auf Basis der Werte zum jeweiligen Erwerbszeitpunkt wie folgt auf den Konzernabschluss auswirkten:

| Mio €                                                               | 2008/2009                      |             |                                |
|---------------------------------------------------------------------|--------------------------------|-------------|--------------------------------|
|                                                                     | Buchwerte zum Erwerbszeitpunkt | Anpassungen | Zeitwerte zum Erwerbszeitpunkt |
| Firmenwert                                                          | 0                              | 20          | 20                             |
| Sonstige immaterielle Vermögenswerte                                | 0                              | 9           | 9                              |
| Sachanlagen                                                         | 21                             | 0           | 21                             |
| Aktive latente Steuern                                              | 1                              | 0           | 1                              |
| Vorräte                                                             | 4                              | 0           | 4                              |
| Forderungen aus Lieferungen und Leistungen                          | 9                              | 0           | 9                              |
| Sonstige kurzfristige finanzielle Vermögenswerte                    | 1                              | 0           | 1                              |
| Sonstige kurzfristige nicht finanzielle Vermögenswerte              | 1                              | 0           | 1                              |
| Zahlungsmittel und Zahlungsmitteläquivalente                        | 2                              | 0           | 2                              |
| <b>Insgesamt erworbene Vermögenswerte</b>                           | <b>39</b>                      | <b>29</b>   | <b>68</b>                      |
| Pensionsrückstellungen und ähnliche Verpflichtungen                 | 1                              | 0           | 1                              |
| Passive latente Steuern                                             | 0                              | 2           | 2                              |
| Sonstige kurzfristige Rückstellungen                                | 1                              | 0           | 1                              |
| Laufende Ertragsteuerverbindlichkeiten                              | 1                              | 0           | 1                              |
| Kurzfristige Finanzschulden                                         | 24                             | 0           | 24                             |
| Verbindlichkeiten aus Lieferungen und Leistungen                    | 4                              | 0           | 4                              |
| Sonstige kurzfristige finanzielle Verbindlichkeiten                 | 1                              | 0           | 1                              |
| Sonstige kurzfristige nicht finanzielle Verbindlichkeiten           | 7                              | 0           | 7                              |
| <b>Insgesamt übernommene Verbindlichkeiten</b>                      | <b>39</b>                      | <b>2</b>    | <b>41</b>                      |
| <b>Erworbenes Reinvermögen</b>                                      | <b>0</b>                       | <b>27</b>   | <b>27</b>                      |
| Nicht beherrschende Anteile                                         |                                |             | 0                              |
| <b>Kaufpreis (einschl. Anschaffungsnebenkosten)</b>                 |                                |             | <b>27</b>                      |
| davon: durch Zahlungsmittel und Zahlungsmitteläquivalente beglichen |                                |             | 18                             |



Darüber hinaus erfolgten im Rahmen der Portfoliobereinigung im Geschäftsjahr 2008/2009 Verkäufe, die jeder für sich genommen nicht wesentlich waren und die sich in Summe auf Basis der Werte zum jeweiligen Veräußerungszeitpunkt wie folgt auf den Konzernabschluss auswirkten:

| Mio €                                                               | 2008/2009 |
|---------------------------------------------------------------------|-----------|
| Sachanlagen                                                         | 13        |
| Vorräte                                                             | 6         |
| Forderungen aus Lieferungen und Leistungen                          | 3         |
| Sonstige kurzfristige nicht finanzielle Vermögenswerte              | 1         |
| Zahlungsmittel und Zahlungsmitteläquivalente                        | 5         |
| <b>Insgesamt abgegebene Vermögenswerte</b>                          | <b>28</b> |
| Pensionsrückstellungen und ähnliche Verpflichtungen                 | 1         |
| Sonstige kurzfristige Rückstellungen                                | 6         |
| Verbindlichkeiten aus Lieferungen und Leistungen                    | 7         |
| Sonstige kurzfristige nicht finanzielle Verbindlichkeiten           | 2         |
| <b>Insgesamt abgegebene Verbindlichkeiten</b>                       | <b>16</b> |
| <b>Abgehendes Reinvermögen</b>                                      | <b>12</b> |
| Nicht beherrschende Anteile                                         | 3         |
| Gewinn/(Verlust) aus den Verkäufen                                  | -5        |
| <b>Verkaufspreise</b>                                               | <b>4</b>  |
| davon: durch Zahlungsmittel und Zahlungsmitteläquivalente beglichen | 4         |

### 03 Disposal Groups und einzelne zur Veräußerung vorgesehene Vermögenswerte

Im Rahmen des Programms zur Portfoliooptimierung hat der Konzern sowohl in 2009/2010 als auch in 2008/2009 den Verkauf einiger Bereiche eingeleitet. Diese Transaktionen erfüllen nicht die Voraussetzungen von IFRS 5 für den Ausweis einer nicht fortgeführten Aktivität. Damit sind die Aufwendungen und Erträge bis zum Zeitpunkt der Veräußerung weiterhin im Ergebnis aus fortgeführten Aktivitäten auszuweisen. Sofern ein Verkauf zum 30. September des jeweiligen Geschäftsjahres noch nicht abgeschlossen war, wurden die Vermögenswerte und Verbindlichkeiten der Disposal Group in der Bilanz zum 30. September dieses Geschäftsjahres separat in den Zeilen „Zur Veräußerung vorgesehene Vermögenswerte“ bzw. „Verbindlichkeiten in Verbindung mit zur Veräußerung vorgesehenen Vermögenswerten“ ausgewiesen.

#### Geschäftsjahr 2009/2010

Im April 2010 wurde die Veräußerung von Teilen der Business Area Marine Systems eingeleitet. Die Transaktion umfasst zum einen die Abgänge bei der Blohm + Voss Naval GmbH im Zusammenhang mit der Gründung eines 50/50-Joint-Ventures für den Bereich Design und Projektmanagement im Überwassermarineschiffbau sowie zum anderen den Verkauf von 100 % an der Blohm + Voss Shipyards GmbH, die im Schiffsneubau insbesondere von Megayachten tätig ist, und den Verkauf von zunächst jeweils 80 % an der Blohm + Voss Repair GmbH und an der Blohm + Voss Industries GmbH, die Schiffsreparatur und Komponentenfertigung betreiben. Daneben werden die Fertigungskapazitäten für den zivilen Schiffbau der ehemaligen HDW Gaarden abgegeben. In Verbindung mit dem eingeleiteten Verkauf entstanden aus der Bewertung zum beizulegenden Zeitwert abzüglich Veräußerungskosten Wertminderungsaufwendungen auf Sachanlagen in Höhe von 6 Mio €, die in den Umsatzkosten ausgewiesen werden. Im Hinblick auf die bis zum Vollzug der Transaktion endgültig abgehenden Vermögenswerte und Verbindlichkeiten sind die zum 30. September 2010 in der nachfolgenden Tabelle ausgewiesenen Werte nur vorläufig:

| Mio €                                                                                   | 30.09.2010 |
|-----------------------------------------------------------------------------------------|------------|
| Firmenwert                                                                              | 120        |
| Sonstige immaterielle Vermögenswerte                                                    | 11         |
| Sachanlagen                                                                             | 51         |
| Sonstige langfristige finanzielle Vermögenswerte                                        | 7          |
| Aktive latente Steuern                                                                  | 10         |
| Vorräte                                                                                 | 48         |
| Forderungen aus Lieferungen und Leistungen                                              | 58         |
| Sonstige kurzfristige finanzielle Vermögenswerte                                        | 24         |
| Sonstige kurzfristige nicht finanzielle Vermögenswerte                                  | 69         |
| Zahlungsmittel und Zahlungsmitteläquivalente                                            | 288        |
| <b>Zur Veräußerung vorgesehene Vermögenswerte</b>                                       | <b>686</b> |
| Rückstellungen für Pensionen und ähnliche Verpflichtungen                               | 125        |
| Sonstige langfristige Rückstellungen                                                    | 7          |
| Passive latente Steuern                                                                 | 29         |
| Sonstige langfristige finanzielle Verbindlichkeiten                                     | 4          |
| Sonstige kurzfristige Rückstellungen                                                    | 51         |
| Laufende Ertragsteuerverbindlichkeiten                                                  | 4          |
| Kurzfristige Finanzschulden                                                             | 12         |
| Verbindlichkeiten aus Lieferungen und Leistungen                                        | 55         |
| Sonstige kurzfristige finanzielle Verbindlichkeiten                                     | 2          |
| Sonstige kurzfristige nicht finanzielle Verbindlichkeiten                               | 216        |
| <b>Verbindlichkeiten in Verbindung mit zur Veräußerung vorgesehenen Vermögenswerten</b> | <b>505</b> |



Ende September 2010 wurde in der Business Area Materials Services der Verkauf der ThyssenKrupp Xervon S. A. in Spanien eingeleitet. Die Gesellschaft ist im Bereich der industriellen Dienstleistungen mit Gerüstbau und Isolierungen tätig. In Verbindung mit dem eingeleiteten Verkauf entstanden aus der Bewertung zum beizulegenden Zeitwert abzüglich Veräußerungskosten Wertminderungsaufwendungen auf Firmenwerte von 2 Mio €, die in den sonstigen betrieblichen Aufwendungen ausgewiesen werden, sowie Wertminderungsaufwendungen auf Sachanlagen von 1 Mio €, die in den Umsatzkosten ausgewiesen werden. Die Vermögenswerte und Verbindlichkeiten der Disposal Group zum 30. September 2010 sind in der nachfolgenden Tabelle dargestellt:

| Mio €                                                                                   | 30.09.2010 |
|-----------------------------------------------------------------------------------------|------------|
| Sachanlagen                                                                             | 1          |
| Aktive latente Steuern                                                                  | 1          |
| Forderungen aus Lieferungen und Leistungen                                              | 8          |
| Zahlungsmittel und Zahlungsmitteläquivalente                                            | 1          |
| <b>Zur Veräußerung vorgesehene Vermögenswerte</b>                                       | <b>11</b>  |
| Passive latente Steuern                                                                 | 1          |
| Sonstige kurzfristige Rückstellungen                                                    | 1          |
| Kurzfristige Finanzschulden                                                             | 6          |
| Verbindlichkeiten aus Lieferungen und Leistungen                                        | 1          |
| Sonstige kurzfristige nicht finanzielle Verbindlichkeiten                               | 1          |
| <b>Verbindlichkeiten in Verbindung mit zur Veräußerung vorgesehenen Vermögenswerten</b> | <b>10</b>  |

Die Veräußerung wurde zwischenzeitlich vollzogen.

Ende September 2010 wurde in der Business Area Elevator Technology der Verkauf der iranischen Gesellschaft ThyssenKrupp Assanbar PJSC eingeleitet. Die Gesellschaft ist sowohl in der Herstellung von Aufzügen als auch im Einbau und der Wartung von Aufzügen und Fahrtreppen tätig. In Verbindung mit dem eingeleiteten Verkauf entstanden aus der Bewertung zum beizulegenden Zeitwert abzüglich Veräußerungskosten Wertminderungsaufwendungen auf Firmenwerte von 3 Mio €, die in den sonstigen betrieblichen Aufwendungen ausgewiesen werden, sowie Wertminderungsaufwendungen auf sonstige immaterielle Vermögenswerte von 1 Mio € und auf Sachanlagen von 1 Mio €, die in den Umsatzkosten ausgewiesen werden. Die Vermögenswerte und Verbindlichkeiten der Disposal Group zum 30. September 2010 sind in der nachfolgenden Tabelle dargestellt:

| Mio €                                                                                   | 30.09.2010 |
|-----------------------------------------------------------------------------------------|------------|
| Aktive latente Steuern                                                                  | 1          |
| Vorräte                                                                                 | 11         |
| Forderungen aus Lieferungen und Leistungen                                              | 9          |
| Sonstige kurzfristige nicht finanzielle Vermögenswerte                                  | 4          |
| Zahlungsmittel und Zahlungsmitteläquivalente                                            | 4          |
| <b>Zur Veräußerung vorgesehene Vermögenswerte</b>                                       | <b>29</b>  |
| Langfristige Finanzschulden                                                             | 7          |
| Sonstige kurzfristige Rückstellungen                                                    | 1          |
| Laufende Ertragsteuerverbindlichkeiten                                                  | 1          |
| Kurzfristige Finanzschulden                                                             | 1          |
| Verbindlichkeiten aus Lieferungen und Leistungen                                        | 4          |
| Sonstige kurzfristige nicht finanzielle Verbindlichkeiten                               | 15         |
| <b>Verbindlichkeiten in Verbindung mit zur Veräußerung vorgesehenen Vermögenswerten</b> | <b>29</b>  |

Neben den Vermögenswerten der Disposal Groups enthält die Bilanzzeile „Zur Veräußerung vorgesehene Vermögenswerte“ Sachanlagen in Höhe von 67 Mio €, die in der Business Area Steel Americas zur Veräußerung vorgesehen sind.



### Geschäftsjahr 2008/2009

Anfang Oktober 2009 wurde im ehemaligen Segment Services der Verkauf des Bereichs ThyssenKrupp Industrieservice eingeleitet. Zum Dienstleistungsspektrum der deutschen Facility Management Dienstleister gehören Instandhaltung, Supply Chain Services, Standortservice und technische Reinigung für die Industrie sowie Industriemontage. Die Vermögenswerte und Verbindlichkeiten der Disposal Group zum 30. September 2009 sind in der nachfolgenden Tabelle dargestellt:

| Mio €                                                                                   | 30.09.2009 |
|-----------------------------------------------------------------------------------------|------------|
| Immaterielle Vermögenswerte                                                             | 25         |
| Sachanlagen                                                                             | 23         |
| Nach der Equity-Methode bilanzierte Beteiligungen                                       | 1          |
| Aktive latente Steuern                                                                  | 2          |
| Vorräte                                                                                 | 7          |
| Forderungen aus Lieferungen und Leistungen                                              | 55         |
| Sonstige kurzfristige finanzielle Vermögenswerte                                        | 1          |
| Sonstige kurzfristige nicht finanzielle Vermögenswerte                                  | 2          |
| Zahlungsmittel und Zahlungsmitteläquivalente                                            | 20         |
| <b>Zur Veräußerung vorgesehene Vermögenswerte</b>                                       | <b>136</b> |
| Rückstellungen für Pensionen und ähnliche Verpflichtungen                               | 12         |
| Sonstige langfristige Rückstellungen                                                    | 1          |
| Passive latente Steuern                                                                 | 2          |
| Sonstige kurzfristige Rückstellungen                                                    | 7          |
| Kurzfristige Finanzschulden                                                             | 34         |
| Verbindlichkeiten aus Lieferungen und Leistungen                                        | 8          |
| Sonstige kurzfristige nicht finanzielle Verbindlichkeiten                               | 26         |
| <b>Verbindlichkeiten in Verbindung mit zur Veräußerung vorgesehenen Vermögenswerten</b> | <b>90</b>  |

Die Veräußerung wurde Ende November 2009 vollzogen.

Ebenfalls im ehemaligen Segment Services wurde im Oktober 2009 der Verkauf des amerikanischen Gerüstdienstleisters ThyssenKrupp Safway eingeleitet. Die Vermögenswerte und Verbindlichkeiten der Disposal Group zum 30. September 2009 sind in der nachfolgenden Tabelle dargestellt:

| Mio €                                                                                   | 30.09.2009 |
|-----------------------------------------------------------------------------------------|------------|
| Immaterielle Vermögenswerte                                                             | 78         |
| Sachanlagen                                                                             | 150        |
| Sonstige langfristige finanzielle Vermögenswerte                                        | 2          |
| Aktive latente Steuern                                                                  | 1          |
| Vorräte                                                                                 | 14         |
| Forderungen aus Lieferungen und Leistungen                                              | 97         |
| Sonstige kurzfristige finanzielle Vermögenswerte                                        | 4          |
| Sonstige kurzfristige nicht finanzielle Vermögenswerte                                  | 3          |
| Zahlungsmittel und Zahlungsmitteläquivalente                                            | 6          |
| <b>Zur Veräußerung vorgesehene Vermögenswerte</b>                                       | <b>355</b> |
| Sonstige langfristige Rückstellungen                                                    | 28         |
| Passive latente Steuern                                                                 | 26         |
| Sonstige kurzfristige Rückstellungen                                                    | 28         |
| Laufende Ertragsteuerverbindlichkeiten                                                  | 2          |
| Kurzfristige Finanzschulden                                                             | 105        |
| Verbindlichkeiten aus Lieferungen und Leistungen                                        | 8          |
| Sonstige kurzfristige finanzielle Verbindlichkeiten                                     | 1          |
| <b>Verbindlichkeiten in Verbindung mit zur Veräußerung vorgesehenen Vermögenswerten</b> | <b>198</b> |

Die Veräußerung wurde Mitte Dezember 2009 vollzogen.



## Erläuterungen zur Konzern-Bilanz

## 04 Immaterielle Vermögenswerte

Die immateriellen Vermögenswerte des Konzerns entwickelten sich wie folgt:

Mio €

|                                                                       | Konzessionen,<br>gewerbliche<br>Schutzrechte<br>und ähnliche<br>Rechte und<br>Werte sowie<br>Lizenzen an<br>solchen<br>Rechten<br>und Werten | Entwicklungs-<br>kosten, eigen-<br>entwickelte<br>Software und<br>Website | Firmenwerte | Insgesamt | nachrichtlich:<br>Darstellung<br>Disposal<br>Groups |
|-----------------------------------------------------------------------|----------------------------------------------------------------------------------------------------------------------------------------------|---------------------------------------------------------------------------|-------------|-----------|-----------------------------------------------------|
| <b>Bruttowerte</b>                                                    |                                                                                                                                              |                                                                           |             |           |                                                     |
| Stand 30.09.2008                                                      | 1.283                                                                                                                                        | 381                                                                       | 4.702       | 6.366     | 0                                                   |
| Währungsunterschiede                                                  | - 9                                                                                                                                          | 4                                                                         | - 40        | - 45      |                                                     |
| Veränderung Konsolidierungskreis                                      | 7                                                                                                                                            | 0                                                                         | 71          | 78        |                                                     |
| Zugänge                                                               | 85                                                                                                                                           | 90                                                                        | 2           | 177       |                                                     |
| Umbuchungen                                                           | 29                                                                                                                                           | 14                                                                        | 0           | 43        |                                                     |
| Abgänge                                                               | - 35                                                                                                                                         | - 1                                                                       | - 8         | - 44      |                                                     |
| Umgliederung w/Ausweis als zur Veräußerung vorgesehene Vermögenswerte | - 11                                                                                                                                         | 0                                                                         | - 134       | - 145     | 145                                                 |
| Stand 30.09.2009                                                      | 1.349                                                                                                                                        | 488                                                                       | 4.593       | 6.430     | 145                                                 |
| Währungsunterschiede                                                  | 34                                                                                                                                           | 30                                                                        | 162         | 226       | 8                                                   |
| Veränderung Konsolidierungskreis                                      | - 5                                                                                                                                          | - 6                                                                       | 49          | 38        | - 154                                               |
| Zugänge                                                               | 32                                                                                                                                           | 60                                                                        | 3           | 95        | 1                                                   |
| Umbuchungen                                                           | 25                                                                                                                                           | 6                                                                         | 0           | 31        | 0                                                   |
| Abgänge                                                               | - 24                                                                                                                                         | - 15                                                                      | 0           | - 39      | 0                                                   |
| Umgliederung w/Ausweis als zur Veräußerung vorgesehene Vermögenswerte | - 30                                                                                                                                         | - 1                                                                       | - 125       | - 156     | 156                                                 |
| Stand 30.09.2010                                                      | 1.381                                                                                                                                        | 562                                                                       | 4.682       | 6.625     | 156                                                 |
| <b>Kumulierte Abschreibungen und Wertminderungsaufwendungen</b>       |                                                                                                                                              |                                                                           |             |           |                                                     |
| Stand 30.09.2008                                                      | 664                                                                                                                                          | 175                                                                       | 844         | 1.683     | 0                                                   |
| Währungsunterschiede                                                  | - 4                                                                                                                                          | 1                                                                         | - 17        | - 20      |                                                     |
| Veränderung Konsolidierungskreis                                      | 0                                                                                                                                            | 0                                                                         | - 2         | - 2       |                                                     |
| Abschreibungen                                                        | 103                                                                                                                                          | 37                                                                        | 0           | 140       |                                                     |
| Wertminderungsaufwendungen                                            | 12                                                                                                                                           | 40                                                                        | 0           | 52        |                                                     |
| Wertaufholungen                                                       | 0                                                                                                                                            | 0                                                                         | —           | 0         |                                                     |
| Umbuchungen                                                           | - 3                                                                                                                                          | 4                                                                         | 0           | 1         |                                                     |
| Abgänge                                                               | - 21                                                                                                                                         | - 3                                                                       | 0           | - 24      |                                                     |
| Umgliederung w/Ausweis als zur Veräußerung vorgesehene Vermögenswerte | - 8                                                                                                                                          | 0                                                                         | - 34        | - 42      | 42                                                  |
| Stand 30.09.2009                                                      | 743                                                                                                                                          | 254                                                                       | 791         | 1.788     | 42                                                  |
| Währungsunterschiede                                                  | 19                                                                                                                                           | 10                                                                        | 28          | 57        | 2                                                   |
| Veränderung Konsolidierungskreis                                      | - 9                                                                                                                                          | - 6                                                                       | 55          | 40        | - 44                                                |
| Abschreibungen                                                        | 97                                                                                                                                           | 37                                                                        | 0           | 134       | 0                                                   |
| Wertminderungsaufwendungen                                            | 3                                                                                                                                            | 5                                                                         | 5           | 13        | 0                                                   |
| Wertaufholungen                                                       | 0                                                                                                                                            | 0                                                                         | —           | 0         | 0                                                   |
| Umbuchungen                                                           | 0                                                                                                                                            | 0                                                                         | 0           | 0         | 0                                                   |
| Abgänge                                                               | - 22                                                                                                                                         | - 11                                                                      | 0           | - 33      | 0                                                   |
| Umgliederung w/Ausweis als zur Veräußerung vorgesehene Vermögenswerte | - 19                                                                                                                                         | - 1                                                                       | - 5         | - 25      | 25                                                  |
| Stand 30.09.2010                                                      | 812                                                                                                                                          | 288                                                                       | 874         | 1.974     | 25                                                  |
| <b>Nettowerte</b>                                                     |                                                                                                                                              |                                                                           |             |           |                                                     |
| Stand 30.09.2008                                                      | 619                                                                                                                                          | 206                                                                       | 3.858       | 4.683     | 0                                                   |
| Stand 30.09.2009                                                      | 606                                                                                                                                          | 234                                                                       | 3.802       | 4.642     | 103                                                 |
| Stand 30.09.2010                                                      | 569                                                                                                                                          | 274                                                                       | 3.808       | 4.651     | 131                                                 |



### Wertminderungen auf Firmenwerte

Wertminderungsaufwendungen auf Firmenwerte werden in den sonstigen betrieblichen Aufwendungen ausgewiesen.

In 2008/2009 sowie in 2009/2010 ergab sich aus der jährlichen Überprüfung der Werthaltigkeit der Firmenwerte kein Wertberichtigungsbedarf, da der erzielbare Betrag der Cash Generating Units jeweils über dem Buchwert lag.

### Wertminderungen auf übrige immaterielle Vermögenswerte

Die Wertminderungsaufwendungen auf die übrigen immateriellen Vermögenswerte sind in den Umsatzkosten enthalten.

In 2008/2009 wurden in der Business Area Steel Europe in der Operating Unit ThyssenKrupp Steel Europe aktivierte Entwicklungskosten in Höhe von 9 Mio € für Projekte zur Verbesserung der Beschaffenheit und der Oberflächenstruktur von Stahl vollständig wertberichtigt, da diese die Aktivierungsvoraussetzungen des IAS 38 nicht mehr erfüllten. Daneben waren in der Business Area Stainless Global in der Operating Unit ThyssenKrupp Nirosta aktivierte Entwicklungskosten für eine Bandgießanlage in Höhe von 16 Mio € auf Grund fehlender Verwertbarkeit am Markt voll wertzuberichtigen. In der Business Area Components Technology wurden in den Operating Units Presta Steering und Bilstein-Gruppe aktivierte Entwicklungskosten in Höhe von 12 Mio € voll wertberichtigt, da diese die Aktivierungsvoraussetzungen des IAS 38 nicht mehr erfüllten.

In 2009/2010 wurden in der Business Area Components Technology in den Operating Units Presta Steering und Camshafts aktivierte Entwicklungskosten in Höhe von 5 Mio € wertberichtigt, da diese die Aktivierungsvoraussetzungen des IAS 38 nicht mehr erfüllten.

### Firmenwerte

Die Firmenwerte (ohne Firmenwerte für nach der Equity-Methode bilanzierte Beteiligungen) sind den Cash Generating Units (CGUs) der Business Areas zugeordnet. Die Bestimmung des erzielbaren Betrags einer CGU erfolgt durch Ermittlung des Nutzungswerts mit Hilfe der Discounted-Cash-Flow-Methode. Dabei werden die geplanten Nach-Steuer-Cash-Flows aus der bottom-up erstellten und vom

Management der ThyssenKrupp AG genehmigten Vierjahresplanung verwendet. Das letzte Planjahr wird grundsätzlich auch für die Cash-Flows jenseits der Planungsperiode angesetzt. Eine Wachstumsrate zur Extrapolation des letzten Planjahres wird nicht berücksichtigt. Der zur Diskontierung verwendete Gesamtkapitalkostensatz basiert auf dem risikofreien Zinssatz in Höhe von 4,25 % sowie auf einer Marktrisikoprämie von 5 % und einem Fremdkapitalspread von 2,4 %-Punkten. Darüber hinaus werden jeweils individuell für jede CGU ein aus der jeweiligen Peer-Group abgeleiteter Beta-Faktor, ein Steuersatz sowie die Kapitalstruktur berücksichtigt. Zur Diskontierung der Cash-Flows wurden folgende für die jeweilige Business Area spezifischen Bandbreiten von Nach-Steuer-Diskontierungszinssätzen zu Grunde gelegt:

| in %                  | Bandbreiten der Diskontierungszinssätze (nach Steuern) |            |
|-----------------------|--------------------------------------------------------|------------|
|                       | 2008/2009                                              | 2009/2010  |
| Steel Europe          | 8,1 - 8,6                                              | 9,4        |
| Steel Americas        | 8,4                                                    | 8,8        |
| Stainless Global      | 7,7 - 9,2                                              | 8,6 - 10,0 |
| Materials Services    | 7,7 - 8,8                                              | 8,1 - 9,2  |
| Elevator Technology   | 8,2 - 8,3                                              | 8,7        |
| Plant Technology      | 7,1 - 10,8                                             | 8,8 - 10,6 |
| Components Technology | 6,8 - 9,6                                              | 6,6 - 8,7  |
| Marine Systems        | 7,1                                                    | 7,1        |
| Corporate             | 7,8                                                    | 7,5        |

Zur Ermittlung des Nutzungswerts für die CGUs werden sowohl Vergangenheitsdaten als auch die erwartete Marktpformance herangezogen. Die den wesentlichen Annahmen zugewiesenen Werte stimmen dabei grundsätzlich mit externen Informationsquellen überein.

Im ThyssenKrupp Konzern wurden 32 CGUs identifiziert. Davon weisen 24 CGUs einen Firmenwert aus. Der Gesamtfirmenwert beträgt zum 01. Oktober 2009 3.802 Mio €. 64 % dieses Firmenwertes entfallen auf die CGUs Steel Europe, Special Services, Industrial Services, Americas und Marine Systems, die in der folgenden Tabelle dargestellt werden:



## WESENTLICHE FIRMENWERTE

| CGU<br>(Business Area)                                          | Buchwert<br>des der CGU<br>zugeordneten<br>Firmenwertes<br>in Mio € | Anteil am<br>Gesamtfirmen-<br>wert in % | Beschreibung der Grundannahmen<br>für die Unternehmensplanung | Darlegung der Vorgehensweise<br>zur Wertbestimmung der Grundannahmen                                                                                                                                                                          |
|-----------------------------------------------------------------|---------------------------------------------------------------------|-----------------------------------------|---------------------------------------------------------------|-----------------------------------------------------------------------------------------------------------------------------------------------------------------------------------------------------------------------------------------------|
| Steel Europe<br>(Steel Europe)                                  | 313                                                                 | 8%                                      | - Absatzpreise<br>- Beschaffungspreise<br>- Konjunkturzyklen  | Konzerninterne Einschätzung der betreffenden Verkaufs- und Einkaufs-<br>abteilungen sowie Berücksichtigung der durch die ThyssenKrupp AG<br>(Markets & Politics) vorgegebenen volkswirtschaftlichen Rahmendaten<br>sowie externe Marktstudien |
| Special Services<br>Industrial Services<br>(Materials Services) | 348                                                                 | 9%                                      | - Absatzpreise<br>- Beschaffungspreise<br>- Konjunkturzyklen  | Ständige Marktbeobachtung sowie Berücksichtigung der durch die<br>ThyssenKrupp AG (Markets & Politics) vorgegebenen volkswirtschaftlichen<br>Konjunkturperspektiven und Rahmendaten, insbesondere Kosten-, Kurs-<br>und Zinsentwicklung       |
| Americas<br>(Elevator<br>Technology)                            | 748                                                                 | 20%                                     | - Beschaffungspreise<br>- Konjunkturzyklen                    | Berücksichtigung der von der ThyssenKrupp AG vorgegebenen volkswirt-<br>schaftlichen Rahmendaten sowie externer lokaler Marktstudien                                                                                                          |
| Marine Systems<br>(Marine Systems)                              | 1.041                                                               | 27%                                     | - Wachstumsraten der Märkte                                   | Marineschiffbau: Berücksichtigung der langfristigen Haushaltsplanungen<br>der potenziellen Kunden und ggf. konkrete Verhandlungen mit den Kunden,<br>verschärfte Konkurrenzsituation bei zugleich sinkenden Budgets der Kunden-<br>länder     |

Aus dem jährlich durchgeführten Firmenwert-Impairment-Test ergab sich bei keiner CGU ein Wertminderungsbedarf, da der erzielbare Betrag in allen Fällen über dem Buchwert der CGU lag. Der erzielbare

Betrag der CGUs ThyssenKrupp Nirosta und ThyssenKrupp Mexinox liegt weniger als 10 % über dem jeweiligen Buchwert der CGU:

## KRITISCHE FIRMENWERTE

| CGU<br>(Business Area)                        | Buchwert<br>der CGU<br>in Mio € | Erzielbarer<br>Betrag der CGU<br>in Mio € | Beschreibung der Grundannahmen<br>für die Unternehmensplanung                              | Darlegung der Vorgehensweise<br>zur Wertbestimmung der Grundannahmen                                                                                                                                                                                  |
|-----------------------------------------------|---------------------------------|-------------------------------------------|--------------------------------------------------------------------------------------------|-------------------------------------------------------------------------------------------------------------------------------------------------------------------------------------------------------------------------------------------------------|
| ThyssenKrupp<br>Nirosta<br>(Stainless Global) | 678                             | 740                                       | - Absatzpreise<br>- Beschaffungspreise<br>- Wachstumsrate der Märkte<br>- Konjunkturzyklen | Berücksichtigung der erwarteten wirtschaftlichen Entwicklung unter Zuhilfenahme der erwarteten Konjunkturperspektiven der ThyssenKrupp AG und Institutionen wie Metalprices, Metal Bulletin, CRU, Wirtschaftsvereinigung Stahl sowie weiterer Studien |
| ThyssenKrupp<br>Mexinox<br>(Stainless Global) | 182                             | 194                                       | - Absatzpreise<br>- Beschaffungspreise<br>- Wachstumsrate der Märkte<br>- Konjunkturzyklen | Berücksichtigung der erwarteten wirtschaftlichen Entwicklung unter Zuhilfenahme der erwarteten Konjunkturperspektiven der ThyssenKrupp AG und Institutionen wie Metalprices, Metal Bulletin, CRU, Wirtschaftsvereinigung Stahl sowie weiterer Studien |

Die Erhöhung des Abzinsungssatzes um 10 % würde zu einem Firmenwert-Impairment bei der CGU ThyssenKrupp Nirosta in Höhe von 11 Mio € und bei der CGU ThyssenKrupp Mexinox in Höhe von 7 Mio € führen. Das Management von ThyssenKrupp geht jedoch für

beide CGUs davon aus, dass eine für möglich gehaltene Änderung einer wesentlichen Annahme, die Basis für die Ermittlung des erzielbaren Betrages war, nicht dazu führt, dass der Buchwert der jeweiligen CGU den erzielbaren Betrag übersteigen würde.



Die Nettowerte der Firmenwerte (ohne Firmenwerte für nach der Equity-Methode bilanzierte Beteiligungen) veränderten sich wie folgt:

Mio €

|                                                                                  | Steel<br>Europe | Steel<br>Americas | Stainless<br>Global | Materials<br>Services | Elevator<br>Technology | Plant<br>Technology | Components<br>Technology | Marine<br>Systems | Corporate | Insgesamt* |
|----------------------------------------------------------------------------------|-----------------|-------------------|---------------------|-----------------------|------------------------|---------------------|--------------------------|-------------------|-----------|------------|
| Stand 30.09.2008                                                                 | 314             | 0                 | 333                 | 437                   | 1.197                  | 296                 | 219                      | 1.047             | 15        | 3.858      |
| Währungsunterschiede                                                             | 0               | 0                 | - 2                 | - 6                   | - 20                   | 1                   | 3                        | 1                 | 0         | - 23       |
| Veränderung<br>Konsolidierungskreis                                              | - 1             | 0                 | 0                   | 51                    | 19                     | 0                   | 2                        | 2                 | 0         | 73         |
| Zugänge                                                                          | 0               | 0                 | 0                   | 1                     | 1                      | 0                   | 0                        | 0                 | 0         | 2          |
| Abgänge                                                                          | 0               | 0                 | 0                   | 0                     | - 1                    | 0                   | 0                        | - 7               | 0         | - 8        |
| Umgliederung w/Ausweis<br>als zur Veräußerung<br>vorgesehene Vermögens-<br>werte | 0               | 0                 | 0                   | - 100                 | 0                      | 0                   | 0                        | 0                 | 0         | - 100      |
| Stand am 30.09.2009                                                              | 313             | 0                 | 331                 | 383                   | 1.196                  | 297                 | 224                      | 1.043             | 15        | 3.802      |
| Währungsunterschiede                                                             | 1               | 0                 | 6                   | 21                    | 82                     | 8                   | 14                       | 1                 | 0         | 133        |
| Veränderung<br>Konsolidierungskreis                                              | 0               | 0                 | 0                   | - 15                  | 5                      | 5                   | 0                        | 0                 | 0         | - 5        |
| Zugänge                                                                          | 0               | 0                 | 0                   | 0                     | 1                      | 2                   | 0                        | 0                 | 0         | 3          |
| Umgliederung w/Ausweis<br>als zur Veräußerung<br>vorgesehene Vermögens-<br>werte |                 |                   |                     | 0                     | 0                      |                     |                          | - 120             |           | - 120      |
| Wertminderungs-<br>aufwendungen                                                  | 0               | 0                 | 0                   | - 2                   | - 3                    | 0                   | 0                        | 0                 | 0         | - 5        |
| Stand am 30.09.2010                                                              | 314             | 0                 | 337                 | 387                   | 1.281                  | 312                 | 238                      | 924               | 15        | 3.808      |

\* ohne Firmenwerte für nach der Equity-Methode bilanzierte Beteiligungen

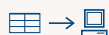

Download der Tabellen unter:  
[http://www.thyssenkrupp.com/financial-reports/09\\_10/de/](http://www.thyssenkrupp.com/financial-reports/09_10/de/)



## 05 Sachanlagen

Die Sachanlagen des Konzerns entwickelten sich wie folgt:

Mio €

|                                                                          | Grundstücke,<br>grundstücks-<br>gleiche<br>Rechte<br>und Bauten<br>einschließlich<br>der Bauten<br>auf fremden<br>Grundstücken | Technische<br>Anlagen und<br>Maschinen | Andere<br>Anlagen,<br>Betriebs-<br>und<br>Geschäfts-<br>ausstattung | Geleaste<br>Sachanlagen<br>(Finance<br>Lease) | Verleaste<br>Sachanlagen<br>(Operating<br>Lease) | Anlagen<br>im Bau | Insgesamt | nachrichtlich:<br>Darstellung<br>Disposal<br>Groups |
|--------------------------------------------------------------------------|--------------------------------------------------------------------------------------------------------------------------------|----------------------------------------|---------------------------------------------------------------------|-----------------------------------------------|--------------------------------------------------|-------------------|-----------|-----------------------------------------------------|
| <b>Bruttowerte</b>                                                       |                                                                                                                                |                                        |                                                                     |                                               |                                                  |                   |           |                                                     |
| Stand 30.09.2008                                                         | 5.288                                                                                                                          | 15.576                                 | 2.438                                                               | 240                                           | 16                                               | 3.229             | 26.787    | 0                                                   |
| Währungsunterschiede                                                     | - 31                                                                                                                           | - 65                                   | - 17                                                                | - 1                                           | 0                                                | - 100             | - 214     |                                                     |
| Veränderung Konsolidierungskreis                                         | 2                                                                                                                              | - 12                                   | 5                                                                   | 0                                             | 0                                                | 4                 | - 1       |                                                     |
| Zugänge                                                                  | 130                                                                                                                            | 660                                    | 222                                                                 | 11                                            | 0                                                | 3.017             | 4.040     |                                                     |
| Umbuchungen                                                              | 113                                                                                                                            | 442                                    | 32                                                                  | - 3                                           | 0                                                | - 82              | 502       |                                                     |
| Abgänge                                                                  | - 42                                                                                                                           | - 223                                  | - 122                                                               | - 19                                          | 0                                                | - 11              | - 417     |                                                     |
| Umgliederung w/Ausweis als zur<br>Veräußerung vorgesehene Vermögenswerte | - 9                                                                                                                            | - 12                                   | - 299                                                               | - 1                                           | - 3                                              | 0                 | - 324     | 324                                                 |
| Stand 30.09.2009                                                         | 5.451                                                                                                                          | 16.366                                 | 2.259                                                               | 227                                           | 13                                               | 6.057             | 30.373    | 324                                                 |
| Währungsunterschiede                                                     | 78                                                                                                                             | 227                                    | 55                                                                  | 3                                             | 0                                                | 114               | 477       | 22                                                  |
| Veränderung Konsolidierungskreis                                         | - 211                                                                                                                          | - 57                                   | - 34                                                                | 0                                             | 0                                                | - 6               | - 308     | - 348                                               |
| Zugänge                                                                  | 483                                                                                                                            | 1.290                                  | 190                                                                 | 12                                            | 0                                                | 1.424             | 3.399     | 5                                                   |
| Umbuchungen                                                              | 363                                                                                                                            | 3.804                                  | 9                                                                   | 4                                             | 0                                                | - 3.901           | 279       | 0                                                   |
| Abgänge                                                                  | - 94                                                                                                                           | - 354                                  | - 174                                                               | - 11                                          | 0                                                | - 9               | - 642     | - 3                                                 |
| Umgliederung w/Ausweis als zur<br>Veräußerung vorgesehene Vermögenswerte | - 133                                                                                                                          | - 202                                  | - 42                                                                | 0                                             | 0                                                | - 73              | - 450     | 377                                                 |
| Stand 30.09.2010                                                         | 5.937                                                                                                                          | 21.074                                 | 2.263                                                               | 235                                           | 13                                               | 3.606             | 33.128    | 377                                                 |
| <b>Kumulierte Abschreibungen und<br/>Wertminderungsaufwendungen</b>      |                                                                                                                                |                                        |                                                                     |                                               |                                                  |                   |           |                                                     |
| Stand 30.09.2008                                                         | 2.666                                                                                                                          | 11.073                                 | 1.646                                                               | 131                                           | 4                                                | 1                 | 15.521    | 0                                                   |
| Währungsunterschiede                                                     | - 9                                                                                                                            | - 51                                   | - 10                                                                | - 1                                           | 0                                                | 0                 | - 71      |                                                     |
| Veränderung Konsolidierungskreis                                         | - 2                                                                                                                            | - 11                                   | 1                                                                   | 0                                             | 0                                                | 4                 | - 8       |                                                     |
| Abschreibungen                                                           | 140                                                                                                                            | 854                                    | 222                                                                 | 21                                            | 1                                                | 0                 | 1.238     |                                                     |
| Wertminderungsaufwendungen                                               | 141                                                                                                                            | 243                                    | 6                                                                   | 0                                             | 0                                                | 2                 | 392       |                                                     |
| Wertaufholungen                                                          | - 1                                                                                                                            | - 1                                    | 0                                                                   | 0                                             | 0                                                | 0                 | - 2       |                                                     |
| Umbuchungen                                                              | - 2                                                                                                                            | - 4                                    | 6                                                                   | - 3                                           | 0                                                | 0                 | - 3       |                                                     |
| Abgänge                                                                  | - 21                                                                                                                           | - 201                                  | - 102                                                               | - 11                                          | - 1                                              | 0                 | - 336     |                                                     |
| Umgliederung w/Ausweis als zur<br>Veräußerung vorgesehene Vermögenswerte | - 4                                                                                                                            | - 9                                    | - 135                                                               | - 1                                           | - 2                                              | 0                 | - 151     | 151                                                 |
| Stand 30.09.2009                                                         | 2.908                                                                                                                          | 11.893                                 | 1.634                                                               | 136                                           | 2                                                | 7                 | 16.580    | 151                                                 |
| Währungsunterschiede                                                     | 24                                                                                                                             | 147                                    | 30                                                                  | 1                                             | 0                                                | 0                 | 202       | 9                                                   |
| Veränderung Konsolidierungskreis                                         | - 221                                                                                                                          | - 65                                   | - 25                                                                | 0                                             | 0                                                | - 5               | - 316     | - 158                                               |
| Abschreibungen                                                           | 141                                                                                                                            | 871                                    | 194                                                                 | 19                                            | 1                                                | 0                 | 1.226     | 0                                                   |
| Wertminderungsaufwendungen                                               | 8                                                                                                                              | 34                                     | 4                                                                   | 0                                             | 0                                                | 6                 | 52        | 0                                                   |
| Wertaufholungen                                                          | - 6                                                                                                                            | 0                                      | 0                                                                   | - 3                                           | 0                                                | 0                 | - 9       | 0                                                   |
| Umbuchungen                                                              | - 9                                                                                                                            | 17                                     | 23                                                                  | 1                                             | 0                                                | 0                 | - 14      | 0                                                   |
| Abgänge                                                                  | - 73                                                                                                                           | - 343                                  | - 158                                                               | - 10                                          | 0                                                | 0                 | - 584     | - 2                                                 |
| Umgliederung w/Ausweis als zur<br>Veräußerung vorgesehene Vermögenswerte | - 108                                                                                                                          | - 182                                  | - 35                                                                | 0                                             | 0                                                | - 6               | - 331     | 325                                                 |
| Stand 30.09.2010                                                         | 2.664                                                                                                                          | 12.372                                 | 1.621                                                               | 144                                           | 3                                                | 2                 | 16.806    | 325                                                 |
| <b>Nettowerte</b>                                                        |                                                                                                                                |                                        |                                                                     |                                               |                                                  |                   |           |                                                     |
| Stand 30.09.2008                                                         | 2.622                                                                                                                          | 4.503                                  | 792                                                                 | 109                                           | 12                                               | 3.228             | 11.266    | 0                                                   |
| Stand 30.09.2009                                                         | 2.543                                                                                                                          | 4.473                                  | 625                                                                 | 91                                            | 11                                               | 6.050             | 13.793    | 173                                                 |
| Stand 30.09.2010                                                         | 3.273                                                                                                                          | 8.702                                  | 642                                                                 | 91                                            | 10                                               | 3.604             | 16.322    | 52                                                  |

Wertminderungsaufwendungen auf Sachanlagen werden in den Umsatzkosten ausgewiesen.



In 2008/2009 standen die vorgenommenen Wertberichtigungen überwiegend in Zusammenhang mit den durchgeführten Restrukturierungsmaßnahmen. So erfolgten in der Business Area Steel Europe in der Operating Unit Processing Wertberichtigungen in Höhe von 13 Mio €, die mit 4 Mio € auf Grundstücke und Bauten und mit 9 Mio € auf technische Anlagen und Maschinen entfallen. Die für die Bestimmung des Wertminderungsaufwands relevanten erzielbaren Beträge entsprechen jeweils den Nutzungswerten, zu deren Berechnung ein Diskontierungssatz von 13,1 % bzw. 14,7 % angesetzt wurde. In der Business Area Stainless Global wurden Wertberichtigungen von 91 Mio € vorgenommen, die mit 14 Mio € auf Grundstücke und Bauten, 76 Mio € auf technische Anlagen und Maschinen und 1 Mio € auf andere Anlagen entfallen; sie betreffen im Wesentlichen die Operating Units ThyssenKrupp Nirosta und Shanghai Krupp Stainless. Die für die Bestimmung des Wertminderungsaufwands relevanten erzielbaren Beträge entsprechen jeweils den Nutzungswerten, zu deren Berechnung ein Diskontierungssatz von 11,7 % bzw. 9,2 % angesetzt wurde. In der Business Area Components Technology führte der starke Nachfrageeinbruch im Automobil- und Baumaschinengeschäft, aber auch im allgemeinen Maschinenbau zu einem beträchtlichen Auftragsrückgang, von dem alle Bereiche betroffen waren, besonders stark jedoch die Fertigung von Baumaschinenkomponenten und geschmiedeten Kurbelwellen. Dies führte zu Wertberichtigungen von 136 Mio €, die mit 8 Mio € auf Grundstücke und Bauten, 126 Mio € auf technische Anlagen und Maschinen und mit 2 Mio € auf andere Anlagen entfallen. Die für die Bestimmung des

jeweiligen Wertminderungsaufwands relevanten erzielbaren Beträge entsprechen jeweils den Nutzungswerten, zu deren Berechnung ein Diskontierungssatz in einer Spanne zwischen 10,1 % und 17,4 % angesetzt wurde. In der Business Area Marine Systems wurden auf Grund der schlechten Auftragssituation Überkapazitäten abgebaut, was zu erheblichen Wertberichtigungen in Höhe von 148 Mio € führte, die mit 114 Mio € Grundstücke und Bauten, mit 30 Mio € technische Anlagen und Maschinen und mit 4 Mio € andere Anlagen betreffen. Die für die Bestimmung des Wertminderungsaufwands relevanten erzielbaren Beträge entsprechen jeweils den Nutzungswerten, zu deren Berechnung ein Diskontierungssatz von 10,1 % angesetzt wurde.

In 2009/2010 wurden in der Business Area Components Technology im Wesentlichen in den Operating Units Forging-Group und Bilstein-Gruppe auf Grund der Nachfragesituation Wertminderungen von 32 Mio € vorgenommen. Davon betreffen 2 Mio € Grundstücke und Bauten, 29 Mio € technische Anlagen und Maschinen sowie 1 Mio € andere Anlagen. Die für die Bestimmung des jeweiligen Wertminderungsaufwands relevanten erzielbaren Beträge entsprechen jeweils den Nutzungswerten, zu deren Berechnung ein Diskontierungssatz von 11,6 % bzw. 13,1 % angesetzt wurde.

Die Sachanlagen enthalten auch geleaste Bauten, technische Anlagen und Maschinen sowie andere Anlagen, bei denen dem Konzern als Leasingnehmer das wirtschaftliche Eigentum zuzurechnen ist, da er alle wesentlichen Chancen und Risiken aus der Nutzung des Leasinggegenstandes trägt.

Mio €

|                                                                                                      | Bruttowerte |            | Kumulierte Abschreibungen und Wertminderungsaufwendungen |            | Nettowerte |            |
|------------------------------------------------------------------------------------------------------|-------------|------------|----------------------------------------------------------|------------|------------|------------|
|                                                                                                      | 30.09.2009  | 30.09.2010 | 30.09.2009                                               | 30.09.2010 | 30.09.2009 | 30.09.2010 |
| Grundstücke, grundstücksgleiche Rechte und Bauten einschließlich der Bauten auf fremden Grundstücken | 94          | 99         | 44                                                       | 46         | 50         | 53         |
| Technische Anlagen und Maschinen                                                                     | 85          | 89         | 59                                                       | 66         | 26         | 23         |
| Andere Anlagen, Betriebs- und Geschäftsausstattung                                                   | 48          | 47         | 33                                                       | 32         | 15         | 15         |
| <b>Geleaste Sachanlagen</b>                                                                          | <b>227</b>  | <b>235</b> | <b>136</b>                                               | <b>144</b> | <b>91</b>  | <b>91</b>  |

Sachanlagen dienen zur Besicherung von Finanzschulden in Höhe von 100 (i. Vj. 129) Mio €.



## 06 Als Finanzinvestition gehaltene Immobilien

Die als Finanzinvestition gehaltenen Immobilien des Konzerns entwickelten sich wie folgt:

Mio €

|                                                                 | 2008/2009 | 2009/2010 |
|-----------------------------------------------------------------|-----------|-----------|
| <b>Bruttowerte</b>                                              |           |           |
| Stand 30.09.2008 bzw. Stand 30.09.2009                          | 506       | 493       |
| Währungsunterschiede                                            | 0         | 0         |
| Veränderung Konsolidierungskreis                                | 0         | 0         |
| Zugänge                                                         | 1         | 1         |
| Umbuchungen                                                     | 10        | 28        |
| Abgänge                                                         | - 24      | - 11      |
| Stand 30.09.2009 bzw. Stand 30.09.2010                          | 493       | 511       |
| <b>Kumulierte Abschreibungen und Wertminderungsaufwendungen</b> |           |           |
| Stand 30.09.2008 bzw. Stand 30.09.2009                          | 149       | 152       |
| Währungsunterschiede                                            | 0         | 0         |
| Veränderung Konsolidierungskreis                                | 0         | 0         |
| Abschreibungen                                                  | 2         | 1         |
| Wertminderungsaufwendungen                                      | 2         | 10        |
| Wertaufholungen                                                 | 0         | 0         |
| Umbuchungen                                                     | 5         | 14        |
| Abgänge                                                         | - 6       | - 3       |
| Stand 30.09.2009 bzw. Stand 30.09.2010                          | 152       | 174       |
| <b>Nettowerte</b>                                               |           |           |
| Stand 30.09.2008                                                | 357       |           |
| Stand 30.09.2009 bzw. Stand 30.09.2010                          | 341       | 337       |

Der beizulegende Zeitwert der als Finanzinvestition gehaltenen Immobilien des Konzerns wird unter Anwendung verschiedener international anerkannter Bewertungsmethoden ermittelt. Hierzu zählen das Ertragswertverfahren, das Discounted Cash-Flow-Verfahren, das Sachwertverfahren und der Vergleich mit aktuellen Marktwerten vergleichbarer Immobilien. Die beizulegenden Zeitwerte der in Deutschland gelegenen, als Finanzinvestition gehaltenen Immobilien werden primär anhand von intern erstellten Gutachten nach dem Ertragswertverfahren auf Grundlage der in Deutschland geltenden „Verordnung über Grundsätze für die Ermittlung der Verkehrswerte von Grundstücken – WertV“ bewertet. Außerhalb von Deutschland gelegene, als Finanzinvestition gehaltene Immobilien werden von externen Gutachtern bewertet.

Zum 30. September 2010 beträgt der beizulegende Zeitwert der von ThyssenKrupp als Finanzinvestition gehaltenen Immobilien 423 (i. Vj. 436) Mio €, wovon 25 (i. Vj. 13) Mio € durch externe Gutachter ermittelt wurden.

In den Bruttowerten ausgewiesenen Zugängen sind nachträgliche Anschaffungskosten von 0,1 (i. Vj. 0) Mio € enthalten.

Aus der Vermietung von als Finanzinvestition gehaltenen Immobilien resultieren Mieterträge von 18 (i. Vj. 20) Mio € sowie direkt zurechenbare betriebliche Aufwendungen von 9 (i. Vj. 10) Mio €. Weitere 14 (i. Vj. 6) Mio € direkt zurechenbare betriebliche Aufwendungen betreffen als Finanzinvestition gehaltene Immobilien, mit denen keine Mieterträge erzielt werden.

## 07 Nach der Equity-Methode bilanzierte Beteiligungen

### Anteile an assoziierten Unternehmen

Zum 30. September 2010 beläuft sich der Buchwert der nach der Equity-Methode bilanzierten Anteile an assoziierten Unternehmen auf 58 (i. Vj. 59) Mio €. Das Ergebnis aus nach der Equity-Methode bilanzierten Anteilen an assoziierten Unternehmen beträgt -3 (i. Vj. -15) Mio €.



Zusammenfassende Finanzinformationen für die nach der Equity-Methode bilanzierten assoziierten Unternehmen enthält die nachfolgende Tabelle, wobei sich die Angaben jeweils auf 100 % und nicht auf den Konzernanteil an den assoziierten Unternehmen beziehen:

| Mio €             | 30.09.2009 | 30.09.2010 |
|-------------------|------------|------------|
| Vermögenswerte    | 717        | 759        |
| Verbindlichkeiten | 521        | 572        |
|                   |            |            |
|                   | 2008/2009  | 2009/2010  |
| Umsatzerlöse      | 629        | 578        |
| Jahresfehlbetrag  | - 34       | - 12       |

In 2009/2010 wurden anteilige Verluste von nach der Equity-Methode bilanzierten assoziierten Unternehmen in Höhe von 222 (i. Vj. 2) Tsd € nicht erfasst; kumuliert betragen die nicht erfassten Verluste 224 (i. Vj. 27) Tsd €.

### Joint Ventures

Die nachfolgende Tabelle enthält zusammenfassende Finanzinformationen zu den Joint Ventures des Konzerns, wobei sich die Angaben jeweils auf den Konzernanteil an den Joint Ventures beziehen:

| Mio €                          | 30.09.2009 | 30.09.2010 |
|--------------------------------|------------|------------|
| Kurzfristige Vermögenswerte    | 641        | 698        |
| Langfristige Vermögenswerte    | 418        | 430        |
| Kurzfristige Verbindlichkeiten | 404        | 399        |
| Langfristige Verbindlichkeiten | 327        | 339        |
|                                |            |            |
|                                | 2008/2009  | 2009/2010  |
| Umsatzerlöse                   | 1.730      | 1.431      |
| Jahresüberschuss               | 20         | 40         |

Die assoziierten Unternehmen und die Joint Ventures sind in der Aufstellung über den Anteilsbesitz des Konzerns enthalten, die unter Anhang-Nr. 37 dargestellt wird.

## 08 Vermietete Gegenstände (Operating Lease)

Der Konzern vermietet als Leasinggeber unter Operating Lease im Wesentlichen gewerblich genutzte Immobilien.

Die zukünftigen Mindestmieterträge aus unkündbaren Operating-Lease-Verträgen betragen zum Stichtag:

| Mio €                               | 30.09.2009 | 30.09.2010 |
|-------------------------------------|------------|------------|
| Bis zu einem Jahr                   | 24         | 24         |
| Zwischen einem Jahr und fünf Jahren | 37         | 31         |
| Länger als fünf Jahre               | 30         | 24         |
| <b>Insgesamt</b>                    | <b>91</b>  | <b>79</b>  |

Die Angabe zu den zukünftigen Mieterträgen beinhaltet keine variablen Mietanteile (Contingent Rentals). Im Berichtsjahr wurden wie im Vorjahr keine variablen Mieterträge aus solchen Contingent-Rentals-Verträgen vereinnahmt.

## 09 Vorräte

| Mio €                                | 30.09.2009   | 30.09.2010   |
|--------------------------------------|--------------|--------------|
| Rohstoffe                            | 1.362        | 2.057        |
| Hilfs- und Betriebsstoffe            | 466          | 500          |
| Unfertige Erzeugnisse und Leistungen | 1.953        | 2.349        |
| Fertige Erzeugnisse und Waren        | 2.954        | 3.356        |
| <b>Insgesamt</b>                     | <b>6.735</b> | <b>8.262</b> |

Vorräte in Höhe von 1.244 (i. Vj. 2.099) Mio € sind zum Nettoveräußerungswert bewertet. Von den Vorräten haben 14 (i. Vj. 5) Mio € eine Lagerdauer von mehr als einem Jahr. Vorräte in Höhe von 36.259 (i. Vj. 36.905) Mio € sind als Aufwand der Berichtsperiode erfasst worden. Wertminderungen von Vorräten von 109 (i. Vj. 317) Mio € erhöhten die Umsatzkosten.

## 10 Forderungen aus Lieferungen und Leistungen

| Mio €                                                     | 30.09.2009   | 30.09.2010   |
|-----------------------------------------------------------|--------------|--------------|
| Forderungen aus Lieferungen und Leistungen                | 4.441        | 5.267        |
| Fertigungsaufträge mit aktivischem Saldo gegenüber Kunden | 679          | 615          |
| <b>Insgesamt</b>                                          | <b>5.120</b> | <b>5.882</b> |

Forderungen aus Lieferungen und Leistungen in Höhe von 732 (i. Vj. 722) Mio € haben eine Restlaufzeit von mehr als einem Jahr. Zum 30. September 2010 bestehen Wertberichtigungen auf zweifelhafte Forderungen von insgesamt 491 (i. Vj. 510) Mio €.



Zum Bilanzstichtag stellen sich die Forderungen aus Lieferungen und Leistungen wie folgt dar:

| Mio €      |                                                       |                                                                                              |                                                                   |                                 |                                 |                                  |                                   |                                    |                                                               |
|------------|-------------------------------------------------------|----------------------------------------------------------------------------------------------|-------------------------------------------------------------------|---------------------------------|---------------------------------|----------------------------------|-----------------------------------|------------------------------------|---------------------------------------------------------------|
|            | Buchwert                                              | davon:<br>zum<br>Abschluss-<br>stichtag<br>weder<br>wertge-<br>mindert<br>noch<br>überfällig | davon: zum Abschlussstichtag nicht wertgemindert, aber überfällig |                                 |                                 |                                  |                                   |                                    | davon:<br>zum<br>Abschluss-<br>stichtag<br>wert-<br>gemindert |
|            | Forderungen<br>aus Liefer-<br>ungen und<br>Leistungen |                                                                                              | überfällig<br>bis 30<br>Tage                                      | überfällig<br>31 bis 60<br>Tage | überfällig<br>61 bis 90<br>Tage | überfällig<br>91 bis 180<br>Tage | überfällig<br>181 bis 360<br>Tage | überfällig<br>mehr als<br>360 Tage |                                                               |
| 30.09.2009 | 5.120                                                 | 4.269                                                                                        | 323                                                               | 107                             | 77                              | 88                               | 79                                | 45                                 | 132                                                           |
| 30.09.2010 | 5.882                                                 | 4.975                                                                                        | 364                                                               | 110                             | 65                              | 105                              | 55                                | 47                                 | 161                                                           |

Die aus der Bilanzierung von Fertigungsaufträgen resultierenden Forderungen setzen sich wie folgt zusammen:

| Mio €                                                                                                |            |            |  |
|------------------------------------------------------------------------------------------------------|------------|------------|--|
|                                                                                                      | 30.09.2009 | 30.09.2010 |  |
| Angefallene Auftragskosten und<br>ausgewiesene Auftragsgewinne<br>(abzüglich ausgewiesener Verluste) | 3.318      | 2.374      |  |
| abzüglich erhaltener Anzahlungen                                                                     | – 2.639    | – 1.759    |  |
| <b>Insgesamt</b>                                                                                     | <b>679</b> | <b>615</b> |  |

Für erhaltene Anzahlungen wurden Vermögenswerte in Höhe von 177 (i. Vj. 99) Mio € sicherungsübereignet. In der Berichtsperiode wurden Umsatzerlöse aus Fertigungsaufträgen in Höhe von 6.101 (i. Vj. 7.276) Mio € erfasst.

Der Konzern verkauft im Wesentlichen kreditversicherte Forderungen aus Lieferungen und Leistungen im Rahmen von bestehenden Programmen revolvingend sowie in Form von Einmaltransaktionen.

Per 30. September 2010 wurden Forderungen mit einem Nominalwert von 341 (i. Vj. 836) Mio € verkauft, die zu einer Ausbuchung aus der Bilanz führten; hieraus erzielte der Konzern einen Verkaufserlös von 339 (i. Vj. 816) Mio €. Im Rahmen dieser Verkäufe behält der Konzern in einigen Fällen Rechte und unwesentliche Pflichten zurück; hierzu zählen vor allem die Erbringung von Abwicklungsdienstleistungen sowie das Stellen von begrenzten Forderungsausfall- und Forderungsverwässerungsreserven. Die bilanzierten Vermögenswerte sowie die gegebenen Garantien, die als Forderungsausfallreserve dienen, betrugen 16 (i. Vj. 73) Mio € zum 30. September 2010. Der Umfang des anhaltenden Engagements des Konzerns, das im Wesentlichen aus Forderungsverwässerungsreserven besteht, betrug 0 (i. Vj. 19) Mio € zum 30. September 2010.

## 11 Sonstige finanzielle Vermögenswerte

| Mio €                                                 |              |             |             |             |
|-------------------------------------------------------|--------------|-------------|-------------|-------------|
|                                                       | 30.09.2009   |             | 30.09.2010  |             |
|                                                       | kurzfristig  | langfristig | kurzfristig | langfristig |
| Kredite und Forderungen                               | 724          | 30          | 350         | 56          |
| Zur Veräußerung verfügbare finanzielle Vermögenswerte | 170          | 64          | 9           | 71          |
| Derivate ohne bilanzielle Sicherungsbeziehung         | 245          | —           | 172         | —           |
| Derivate mit bilanzieller Sicherungsbeziehung         | 114          | —           | 154         | —           |
| <b>Insgesamt</b>                                      | <b>1.253</b> | <b>94</b>   | <b>685</b>  | <b>127</b>  |

Sonstige finanzielle Vermögenswerte in Höhe von 157 (i. Vj. 122) Mio € haben eine Restlaufzeit von mehr als einem Jahr. Zum 30. September 2010 bestehen Wertberichtigungen von insgesamt

41 (i. Vj. 60) Mio € für kurzfristige und 44 (i. Vj. 51) Mio € für langfristige sonstige finanzielle Vermögenswerte.



Zum Bilanzstichtag stellen sich die sonstigen finanziellen Vermögenswerte wie folgt dar:

| Mio €      |          |                                                           |                                                                   |                           |                           |                            |                             |                              |                                     |
|------------|----------|-----------------------------------------------------------|-------------------------------------------------------------------|---------------------------|---------------------------|----------------------------|-----------------------------|------------------------------|-------------------------------------|
|            | Buchwert | davon:                                                    | davon: zum Abschlussstichtag nicht wertgemindert, aber überfällig |                           |                           |                            |                             |                              | davon:                              |
|            |          | zum Abschlussstichtag weder wertgemindert noch überfällig | überfällig bis 30 Tage                                            | überfällig 31 bis 60 Tage | überfällig 61 bis 90 Tage | überfällig 91 bis 180 Tage | überfällig 181 bis 360 Tage | überfällig mehr als 360 Tage | zum Abschlussstichtag wertgemindert |
| 30.09.2009 | 1.347    | 1.270                                                     | 2                                                                 | 1                         | 0                         | 1                          | 1                           | 1                            | 71                                  |
| 30.09.2010 | 812      | 757                                                       | 5                                                                 | 2                         | 0                         | 1                          | 1                           | 2                            | 44                                  |

## 12 Sonstige nicht finanzielle Vermögenswerte

| Mio €                                                                         |              |             |              |             |
|-------------------------------------------------------------------------------|--------------|-------------|--------------|-------------|
|                                                                               | 30.09.2009   |             | 30.09.2010   |             |
|                                                                               | kurzfristig  | langfristig | kurzfristig  | langfristig |
| Geleistete Anzahlungen auf immaterielle Vermögenswerte                        | —            | 24          | —            | 20          |
| Geleistete Anzahlungen auf Sachanlagen                                        | —            | 431         | —            | 180         |
| Geleistete Anzahlungen auf Vorräte                                            | 771          | —           | 556          | —           |
| Sonstige geleistete Anzahlungen und Vorauszahlungen                           | 200          | —           | 204          | —           |
| Erstattungsansprüche aus Gesundheitsfürsorgeleistungen (Reimbursement Rights) | 76           | —           | 94           | —           |
| Übrige                                                                        | 677          | —           | 792          | —           |
| <b>Insgesamt</b>                                                              | <b>1.724</b> | <b>455</b>  | <b>1.646</b> | <b>200</b>  |

Sonstige nicht finanzielle Vermögenswerte in Höhe von 35 (i. Vj. 43) Mio € haben eine Restlaufzeit von mehr als einem Jahr. Zum 30. September 2010 bestehen Wertberichtigungen von insgesamt 23 (i. Vj. 19) Mio € für kurzfristige und 3 (i. Vj. 0) Mio € für langfristige sonstige nicht finanzielle Vermögenswerte.

## 13 Eigenkapital

Vom Stand des kumulierten sonstigen Ergebnisses entfallen zum 30.09.2008 2 Mio €, zum 30.09.2009 2 Mio € und zum 30.09.2010 7 Mio € auf assoziierte Unternehmen. Von den Veränderungen des kumulierten sonstigen Ergebnisses resultieren 5 (i. Vj. 0) Mio € aus assoziierten Unternehmen.

Die nachfolgende Tabelle zeigt die Entwicklung des Unterschiedsbetrags aus der Währungsumrechnung, der Bestandteil des kumulierten sonstigen Ergebnisses ist:

| Mio €                                             |                                               |
|---------------------------------------------------|-----------------------------------------------|
|                                                   | Unterschiedsbetrag aus der Währungsumrechnung |
| Stand am 30.09.2008                               | – 285                                         |
| Veränderung der unrealisierten Gewinne/(Verluste) | – 48                                          |
| Realisierte (Gewinne)/Verluste                    | 0                                             |
| <b>Stand am 30.09.2009</b>                        | <b>– 333</b>                                  |
| Veränderung der unrealisierten Gewinne/(Verluste) | 457                                           |
| Realisierte (Gewinne)/Verluste                    | 14                                            |
| <b>Stand am 30.09.2010</b>                        | <b>138</b>                                    |

### Gezeichnetes Kapital

Zum 30. September 2010 ist das Gezeichnete Kapital unverändert gegenüber dem Vorjahr eingeteilt in 514.489.044 auf den Inhaber lautende Stückaktien. Die Aktien sind alle ausgegeben; zum Bilanzstichtag befanden sich 464.394.337 (i. Vj. 463.473.492) Aktien im Umlauf. Rechnerisch entfällt auf jede Aktie ein Anteil am Gezeichneten Kapital in Höhe von 2,56 €.

Alle Aktien gewähren die gleichen Rechte. Die Aktionäre sind zum Bezug der beschlossenen Dividenden berechtigt und verfügen auf der Hauptversammlung über ein Stimmrecht je Aktie.

### Kapitalrücklage

Die Kapitalrücklage enthält die Effekte aus der Bilanzierung des Unternehmenszusammenschlusses von Thyssen und Krupp sowie Agien aus Kapitalerhöhungen bei Tochtergesellschaften mit Minderheiten.



### Gewinnrücklagen

Die Gewinnrücklagen enthalten die in der Vergangenheit erzielten Konzernergebnisse, soweit diese nicht ausgeschüttet worden sind. Darüber hinaus beinhaltet diese Position die Verrechnung der versicherungsmathematischen Gewinne und Verluste sowie im Vorjahr die Eigenkapitaleffekte aus aktienbasierter Vergütung.

### Eigene Anteile

Im Rahmen der Ermächtigung der Hauptversammlung vom 18. Januar 2008 hat der Vorstand der ThyssenKrupp AG am 31. Januar 2008 beschlossen, eigene Anteile bis zu rund 3 % des derzeitigen Grundkapitals zu erwerben. Im Zeitraum vom 01. Februar 2008 bis zum 07. März 2008 hat die ThyssenKrupp AG 14.791.100 Aktien oder rund 2,9 % des Grundkapitals zu einem Durchschnittskurs von 35,34 € zurückgekauft. Dies entspricht einem Gesamtbetrag von 523 Mio €. Darüber hinaus hat der Vorstand auf Basis der Hauptversammlungsermächtigung am 14. Juli 2008 beschlossen, weitere eigene Anteile bis zu rund 2,0 % des Grundkapitals zu erwerben. Im Zeitraum vom 15. Juli 2008 bis zum 13. August 2008 hat die ThyssenKrupp AG 10.500.000 Aktien oder rund 2,0 % des Grundkapitals zu einem Durchschnittskurs von 33,98 € zurückgekauft. Dies entspricht einem Gesamtbetrag von 357 Mio €.

Zur Bedienung des rabattierten Aktienkaufs 2007/2008 wurden am 02. Dezember 2009 in der 1. Tranche 350.924 eigene Anteile und am 04. März 2010 in der 2. Tranche 40.793 eigene Anteile zum Kurs von 24,62 € je Anteil an die Begünstigten veräußert. Weitere 529.128 eigene Anteile wurden am 18. Mai 2010 im Rahmen des deutschen Belegschaftsaktienprogramms zum Kurs von 22,09 € je Anteil veräußert. Die angegebenen Kurse stellen dabei jeweils die Basis für den rabattierten Ausgabepreis dar.

Nach den beiden Erwerben in 2007/2008 und dem bereits in 2005/2006 durchgeführten Erwerb eigener Anteile sowie den drei Veräußerungen eigener Anteile in 2009/2010 im Rahmen der Mitarbeiterprogramme hält die ThyssenKrupp AG zum 30. September 2010 insgesamt 50.094.707 eigene Anteile oder rund 9,7 % des Grundkapitals.

### Angaben zum Kapitalmanagement

Zum 30. September 2010 lag die Eigenkapitalquote bei 23,8 % (i. Vj. 23,4 %). Zu den wichtigsten finanzwirtschaftlichen Zielen des ThyssenKrupp Konzerns zählen die nachhaltige Steigerung des Unternehmenswertes und die Sicherstellung der jederzeitigen Zahlungsfähigkeit. Große Bedeutung in diesem Zusammenhang hat die Schaffung von ausreichenden Liquiditätsreserven. Die Zielerreichung erfolgt durch den Einsatz diverser Maßnahmen zur Reduzierung der Kapitalkosten und Optimierung der Kapitalstruktur sowie durch ein effektives Risikomanagement.

Die Beurteilung der finanzwirtschaftlichen Risiken des ThyssenKrupp Konzerns ergibt sich aus den Einstufungen der Ratingagenturen:

|                   | Langfrist-Rating | Kurzfrist-Rating | Ausblick |
|-------------------|------------------|------------------|----------|
| Standard & Poor's | BB+              | B                | stabil   |
| Moody's           | Baa3             | Prime-3          | negativ  |
| Fitch             | BBB-             | F3               | stabil   |

Im abgelaufenen Geschäftsjahr hat die Ratingagentur Standard & Poor's das Rating von ThyssenKrupp auf BB+ herabgestuft. Damit verfügt ThyssenKrupp derzeit nicht über ein Investment-Grade-Rating bei Standard & Poor's. Bei Moody's und Fitch befindet sich das Rating weiterhin im Investment-Grade-Bereich. Die Wiedererlangung des Investment-Grade-Status bei Standard & Poor's ist ein wesentliches Ziel von ThyssenKrupp. Für die Finanzierung des ThyssenKrupp Konzerns führt ein Investment-Grade-Rating in den Kategorien des „BBB“-Bereichs zum Optimum der Kapitalkosten. Es stellt grundsätzlich den Zugang zu einer breiten Investorenbasis sicher. Das Kapitalmanagement basiert bei ThyssenKrupp auf den durch die Ratingagenturen publizierten Verschuldungskennziffern, die periodenbezogenen Relationen aus Cash-Flow und Verschuldung ermitteln. Satzungs-mäßigen Kapitalerfordernissen unterliegt ThyssenKrupp nicht.

### Ermächtigungen

Gemäß § 5 Abs. 5 der Satzung der ThyssenKrupp AG ist der Vorstand ermächtigt, das Grundkapital der Gesellschaft bis zum 18. Januar 2012 mit Zustimmung des Aufsichtsrats um bis zu 500 Mio € durch die Ausgabe von bis zu 195.312.500 neuen, auf den Inhaber lautenden Stückaktien gegen Bar- und/oder Sacheinlagen einmal oder mehrmals zu erhöhen (Genehmigtes Kapital).

Durch Beschlussfassung der Hauptversammlung vom 23. Januar 2009 ist der Vorstand ermächtigt, mit Zustimmung des Aufsichtsrats auf den Inhaber lautende Schuldverschreibungen im Gesamtnennbetrag von bis zu 2 Mrd € zu begeben und den Inhabern von Schuldverschreibungen Umtauschrechte auf insgesamt bis zu 50 Mio eigene, auf den Inhaber lautende Stückaktien der ThyssenKrupp AG mit einem anteiligen rechnerischen Betrag am Grundkapital der Gesellschaft von bis zu 128 Mio € zu gewähren (Wandelschuldverschreibungen). Die Ermächtigung gilt bis zum 22. Januar 2014.

Darüber hinaus ist die ThyssenKrupp AG durch Beschlussfassung der Hauptversammlung vom 21. Januar 2010 bis zum 20. Januar 2015 ermächtigt, für bestimmte vordefinierte Zwecke eigene Anteile bis zu insgesamt 10 % des zum Zeitpunkt der Beschlussfassung bestehenden Grundkapitals zu erwerben. Der Erwerb der eigenen Anteile kann auch unter Einsatz von Eigenkapitalderivaten (Put-Optionen, Call-Optionen oder einer Kombination aus beiden) erfolgen.



### Dividendenvorschlag

Vorstand und Aufsichtsrat schlagen der Hauptversammlung vor, aus dem nach den Grundsätzen des deutschen Handelsgesetzbuches (HGB) ermittelten Bilanzgewinn der ThyssenKrupp AG für das Geschäftsjahr 2009/2010 eine Dividende von 0,45 € je dividendenberechtigter Aktie auszuschütten. Hieraus würde sich eine Dividendenausschüttung von insgesamt 209 Mio € ergeben.

## 14 Aktienbasierte Vergütung

### Management Incentivepläne

In 2003 implementierte ThyssenKrupp einen performance-orientierten Mid Term Incentiveplan, in dessen Rahmen Wertrechte an die Begünstigten ausgegeben werden. Teilnahmeberechtigt sind alle Mitglieder des Vorstands der ThyssenKrupp AG. Beginnend mit der zweiten Tranche, deren Ausgabe in 2004 erfolgte, wurde der Teilnehmerkreis auf die Vorstandsmitglieder der damaligen Segmentführungsgesellschaften und einige andere ausgewählte Führungskräfte zu modifizierten Bedingungen ausgedehnt. Heute gehören neben den Vorstandsmitgliedern der ThyssenKrupp AG und der Business Areas Geschäftsführer und ausgewählte Führungskräfte großer Konzernunternehmen zum Begünstigtenkreis. Zum 30. September 2010 sind in der 6. Tranche 213.266 Wertrechte, in der 7. Tranche 532.575 Wertrechte und in der 8. Tranche 373.363 Wertrechte ausgegeben.

Die Anzahl der ausgegebenen Wertrechte wird am Ende des jeweiligen Performance-Zeitraums auf Basis eines Vergleichs des durchschnittlichen ThyssenKrupp Value Added (TKVA) des dreijährigen Performance-Zeitraums – beginnend mit dem 01. Oktober des Geschäftsjahres, in dem die Wertrechte gewährt wurden – mit dem durchschnittlichen TKVA der vorangegangenen drei Geschäftsjahre angepasst. Am Ende des Performance-Zeitraums erfolgt eine Vergütung der gewährten Wertrechte auf Basis des Durchschnittskurses der ThyssenKrupp Aktie, der sich aus dem Kursverlauf in den ersten drei Monaten nach Ende des Performance-Zeitraums ergibt.

Zur Bestimmung der beizulegenden Zeitwerte der Wertrechte, die die Grundlage für die Ermittlung der zeitanteiligen Rückstellung zum Bilanzstichtag sind, werden Forward-Preise der ThyssenKrupp Aktie unter Berücksichtigung teilweiser Deckelungen ab der 3. Tranche berechnet. Die Forward-Ermittlung erfolgt für im Voraus definierte Perioden (Mittelungsperioden) unter Berücksichtigung des Aktienkurses der ThyssenKrupp Aktie und der Euro-Zinsstrukturkurve zum Stichtag sowie der angenommenen Dividendenzahlungen der ThyssenKrupp AG bis zur Fälligkeit der Wertrechte. Folgende Parameter sind in die Berechnung eingegangen:

#### 2008/2009

|                                                                | 5. Tranche          | 6. Tranche          | 7. Tranche                                 |
|----------------------------------------------------------------|---------------------|---------------------|--------------------------------------------|
| Fälligkeit                                                     | 31.12.2009          | 31.12.2010          | 31.12.2011                                 |
| Mittelungsperiode                                              | 01.10. - 31.12.2009 | 01.10. - 31.12.2010 | 01.10. - 31.12.2011                        |
| ThyssenKrupp Aktienkurs zum Stichtag                           | 23,53 €             | 23,53 €             | 23,53 €                                    |
| Angenommene Dividendenzahlung(en) pro Aktie bis zur Fälligkeit | —                   | 0,30 € zum 22.01.10 | 0,30 € zum 22.01.10<br>0,30 € zum 24.01.11 |
| Durchschnittliche Dividendenrendite                            | —                   | 1,16%               | 1,21%                                      |
| Durchschnittlicher Zins (Mittelungsperiode)                    | 0,53%               | 1,29%               | 1,78%                                      |
| <b>Beizulegender Wert per 30.09.2009</b>                       |                     |                     |                                            |
| - ungedeckt                                                    | 23,50 €             | 23,16 €             | 22,85 €                                    |
| - gedeckt                                                      | 23,50 €             | 23,16 €             | 22,85 €                                    |

#### 2009/2010

|                                                                | 6. Tranche          | 7. Tranche          | 8. Tranche                                 |
|----------------------------------------------------------------|---------------------|---------------------|--------------------------------------------|
| Fälligkeit                                                     | 31.12.2010          | 31.12.2011          | 31.12.2012                                 |
| Mittelungsperiode                                              | 01.10. - 31.12.2010 | 01.10. - 31.12.2011 | 01.10. - 31.12.2012                        |
| ThyssenKrupp Aktienkurs zum Stichtag                           | 23,92 €             | 23,92 €             | 23,92 €                                    |
| Angenommene Dividendenzahlung(en) pro Aktie bis zur Fälligkeit | —                   | 0,45 € zum 24.01.11 | 0,45 € zum 24.01.11<br>0,50 € zum 23.01.12 |
| Durchschnittliche Dividendenrendite                            | —                   | 1,71%               | 1,91%                                      |
| Durchschnittlicher Zins (Mittelungsperiode)                    | 0,76%               | 1,32%               | 1,52%                                      |
| <b>Beizulegender Wert per 30.09.2010</b>                       |                     |                     |                                            |
| - ungedeckt                                                    | 23,89 €             | 23,42 €             | 22,92 €                                    |
| - gedeckt                                                      | 23,89 €             | 23,42 €             | 22,92 €                                    |



Im 2. Quartal 2009/2010 ist die 5. Tranche des Mid Term Incentiveplans auf Grund der rückläufigen Entwicklung des TKVA im Performance-Zeitraum ohne die Zahlung einer Vergütung verfallen, nachdem im 2. Quartal 2008/2009 die 4. Tranche des Mid Term Incentiveplans mit einer Zahlung von 15,82 € je Wertrecht bzw. einer Gesamtzahlung von 23,5 Mio € abgerechnet worden ist. Insgesamt enthält das Ergebnis 2009/2010 Aufwendungen für den Mid Term Incentiveplan in Höhe von 4,4 (i. Vj. Erträge von 19,4) Mio €. Zum 30. September 2010 beträgt die aus dem Mid Term Incentiveplan resultierende Verpflichtung 4,4 (i. Vj. 0) Mio €.

Im Februar 2006 implementierte der Konzern darüber hinaus ein Aktienprogramm für ausgewählte Führungskräfte, die nicht durch den Mid Term Incentiveplan begünstigt sind. Im Rahmen dieses Programms sind die Begünstigten berechtigt, ThyssenKrupp Aktien bis zu einem festgelegten Betrag mit Rabatt zu erwerben. Im März 2008 wurde für das Geschäftsjahr 2007/2008 erneut ein Programm beschlossen, das wiederum ausgewählten Führungskräften des Konzerns die Möglichkeit gibt, ThyssenKrupp Aktien bis zu einem festgelegten Betrag mit Rabatt zu erwerben. Die Umsetzung des neuen Programms wurde auf das Geschäftsjahr 2009/2010 verschoben. Nachdem im Dezember 2009 die 1. Tranche des Programms zum rabattierten Aktienkauf aus dem Geschäftsjahr 2007/2008 mit dem Erwerb von 350.924 ThyssenKrupp Aktien mit Rabatt durch die Begünstigten abgeschlossen wurde, folgte im März 2010 der Abschluss der 2. Tranche des Programms mit dem Erwerb von 40.793 ThyssenKrupp Aktien mit Rabatt. Aus diesem Programm resultieren in 2009/2010 Aufwendungen von 0,9 Mio €, nachdem hierfür bereits in 2008/2009 Aufwendungen von 3,0 Mio € und in 2007/2008 Aufwendungen von 9,4 Mio € hierfür erfasst wurden. Zum 30.09.2010 existieren keine Verpflichtungen aus dem Programm; zum 30.09.2009 bestanden Verpflichtungen von insgesamt 12,4 Mio €, von denen 6,7 Mio € direkt im Eigenkapital ausgewiesen wurden.

Im September 2010 wurde die Ausgestaltung der variablen Vergütung der Mitglieder des Vorstandes der ThyssenKrupp AG angepasst. Dementsprechend werden 25 % der für das jeweilige Geschäftsjahr gewährten Tantieme verpflichtend in Wertsteigerungsrechte der ThyssenKrupp AG umgewandelt und erst nach einer dreijährigen Sperrfrist vergütet. Die Anzahl der Wertsteigerungsrechte ergibt sich durch die Division von 25 % der Tantieme durch den Durchschnittskurs der ThyssenKrupp Aktie im 4. Quartal des Geschäftsjahres, für welches die Tantieme gewährt wird. Nach Ablauf von drei Geschäftsjahren berechnet sich die Höhe der Vergütung durch die Multiplikation der Anzahl der Wertsteigerungsrechte mit

dem Durchschnittskurs der ThyssenKrupp Aktie im 4. Quartal des 3. Geschäftsjahres. Zusätzlich wird pro Wertsteigerungsrecht der Dividendenbetrag ausgezahlt, der für diese drei Geschäftsjahre sonst ausgeschüttet worden wäre. Sofern den Vorstandsmitgliedern der ThyssenKrupp AG wie in 2009/2010 neben der Tantieme ein Bonus gewährt wird, werden von diesem Bonus 55 % ebenfalls verpflichtend in Wertsteigerungsrechte umgewandelt und gemäß dem Tantiememodell behandelt. Das Ergebnis 2009/2010 enthält aus dieser Vergütungskomponente Aufwendungen von 3 (i. Vj. 0) Mio €; die daraus zum 30. September 2010 resultierende Verpflichtung beträgt 3 (i. Vj. 0) Mio €.

### Belegschaftsaktienprogramm

Im 3. Quartal 2009/2010 hat der Konzern der inländischen Belegschaft den Erwerb von ThyssenKrupp Belegschaftsaktien im Gegenwert von bis zu 270 € mit einem 50%igen Rabatt angeboten. Hieraus resultierte ein Aufwand von 6,1 Mio €. In 2008/2009 wurden keine Programme angeboten.

## 15 Rückstellungen für Pensionen und ähnliche Verpflichtungen

| Mio €                                                                                                       | 30.09.2009   | 30.09.2010   |
|-------------------------------------------------------------------------------------------------------------|--------------|--------------|
| Pensionen                                                                                                   | 6.068        | 6.669        |
| Gesundheitsfürsorgeverpflichtungen                                                                          | 1.076        | 1.257        |
| Sonstige pensionsähnliche Verpflichtungen                                                                   | 393          | 285          |
| Umgliederung w/Ausweis als Verbindlichkeiten in Verbindung mit zur Veräußerung vorgesehenen Vermögenswerten | – 12         | – 125        |
| <b>Insgesamt</b>                                                                                            | <b>7.525</b> | <b>8.086</b> |

Rückstellungen für Pensionen und ähnliche Verpflichtungen in Höhe von 7.455 (i. Vj. 6.916) Mio € haben eine Restlaufzeit von mehr als einem Jahr.

### Pensionen

ThyssenKrupp gewährt betriebliche Altersversorgung in Form von leistungs- oder beitragsorientierten Plänen an die überwiegende Mehrheit der Arbeitnehmer in Deutschland, in den USA, Kanada und Großbritannien. In einigen anderen Ländern erhalten berechnete Arbeitnehmer Leistungen nach den jeweiligen landesspezifischen Gegebenheiten.



In Deutschland bestehen die Leistungen in der Regel in Rentenzahlungen, die einen Inflationsausgleich beinhalten. Ein Teil der leitenden Angestellten erhält Rentenleistungen, die von der Dienstzeit und vom Vergütungsniveau in einem Referenzzeitraum von in der Regel drei Jahren vor der Pensionierung abhängen. Im Übrigen erhalten die Arbeitnehmer in der Regel Zusagen auf feste Rentenbeträge pro Dienstjahr. Darüber hinaus bietet ThyssenKrupp in Deutschland die Möglichkeit, durch Gehaltsumwandlung zusätzliche Versorgungsbezüge zu erwerben (Deferred-Compensation-Vereinbarungen). Die Umwandlungsbeträge sind verzinslich mit 6,00 % und führen bei Eintritt des Versorgungsfalls zu einem festgelegten Leistungsanspruch.

In den USA und Kanada erhalten auf Stundenbasis bezahlte Arbeitnehmer Rentenzusagen auf Basis von Festbeträgen pro Dienstjahr. Arbeitnehmer mit festen Bezügen erhalten Leistungen in der Regel in Abhängigkeit von ihrer Dienstzeit und den während ihrer Dienstzeit erzielten Bezügen. In Großbritannien erhalten Arbeitnehmer Rentenleistungen in Abhängigkeit von ihren Dienstjahren und dem Endgehalt bei Pensionierung.

#### Veränderung des Anwartschaftsbarwerts und des Planvermögens

Die Veränderung des Anwartschaftsbarwerts der Pensionsverpflichtungen sowie des beizulegenden Zeitwerts des Planvermögens stellt sich wie folgt dar:

Mio €

|                                                                                      | 30.09.2009   |               | 30.09.2010   |               |
|--------------------------------------------------------------------------------------|--------------|---------------|--------------|---------------|
|                                                                                      | Deutschland  | Übrige Länder | Deutschland  | Übrige Länder |
| <b>Veränderung des Anwartschaftsbarwerts:</b>                                        |              |               |              |               |
| Anwartschaftsbarwert am Anfang des Geschäftsjahres                                   | 5.013        | 1.925         | 5.712        | 2.042         |
| Dienstzeitaufwand: Barwert der im Geschäftsjahr hinzuverdienten Versorgungsansprüche | 60           | 25            | 69           | 31            |
| Zinsaufwand: Aufzinsung der bereits erworbenen Ansprüche                             | 324          | 120           | 287          | 111           |
| Beiträge der Arbeitnehmer                                                            | 0            | 9             | 0            | 9             |
| Nachzuverrechnender Dienstzeitaufwand                                                | 22           | 0             | 2            | 13            |
| Versicherungsmathematische (Gewinne)/Verluste                                        | 706          | 232           | 672          | 164           |
| Veränderung Konsolidierungskreis                                                     | 0            | 0             | - 16         | - 34          |
| Plankürzungen und Planabgeltungen                                                    | 0            | - 43          | 0            | - 1           |
| Leistungen aus Anlass der Beendigung des Arbeitsverhältnisses                        | 8            | 8             | 0            | 0             |
| Kursdifferenzen                                                                      | 0            | - 90          | 0            | 158           |
| Rentenzahlungen                                                                      | - 421        | - 157         | - 418        | - 151         |
| Sonstiges                                                                            | 0            | 13            | 0            | 14            |
| <b>Anwartschaftsbarwert am Ende des Geschäftsjahres</b>                              | <b>5.712</b> | <b>2.042</b>  | <b>6.308</b> | <b>2.356</b>  |
| <b>Veränderung des Planvermögens:</b>                                                |              |               |              |               |
| Beizulegender Zeitwert des Planvermögens am Anfang des Geschäftsjahres               | 180          | 1.544         | 179          | 1.513         |
| Erwartete Erträge aus dem Planvermögen                                               | 11           | 102           | 13           | 106           |
| Versicherungsmathematische Gewinne/(Verluste)                                        | - 2          | - 21          | - 6          | 66            |
| Veränderung Konsolidierungskreis                                                     | 0            | 0             | - 4          | 0             |
| Beiträge der Arbeitgeber                                                             | 0            | 115           | 31           | 140           |
| Beiträge der Arbeitnehmer                                                            | 0            | 9             | 0            | 9             |
| Planabgeltungen                                                                      | 0            | - 34          | 0            | 0             |
| Kursdifferenzen                                                                      | 0            | - 73          | 0            | 123           |
| Rentenzahlungen                                                                      | - 10         | - 142         | 0            | - 130         |
| Sonstiges                                                                            | 0            | 13            | 0            | 13            |
| <b>Beizulegender Zeitwert des Planvermögens am Ende des Geschäftsjahres</b>          | <b>179</b>   | <b>1.513</b>  | <b>213</b>   | <b>1.840</b>  |

Zum Bilanzstichtag beziehen sich 6.023 (i. Vj. 5.523) Mio € des Anwartschaftsbarwerts auf Pläne, die nicht über einen Fonds finanziert werden und 2.641 (i. Vj. 2.231) Mio € des Anwartschaftsbarwerts auf Pläne, die ganz oder teilweise aus einem Fonds finanziert werden.

Die tatsächlichen Erträge aus dem Planvermögen betragen 179 (i. Vj. 90) Mio € und berechnen sich als Summe der erwarteten Erträge aus dem Planvermögen und den versicherungsmathematischen Gewinnen bzw. Verlusten.



### Finanzierungsstatus und bilanzierter Betrag

Die nachfolgende Tabelle zeigt den Finanzierungsstatus, der sich aus der Differenz zwischen Anwartschaftsbarwert und Planvermögen errechnet, einschließlich der Überleitung zu den bilanzierten Beträgen:

Mio €

|                                                                     | 30.09.2009     |               | 30.09.2010     |               |
|---------------------------------------------------------------------|----------------|---------------|----------------|---------------|
|                                                                     | Deutschland    | Übrige Länder | Deutschland    | Übrige Länder |
| Finanzierungsstatus am Ende des Geschäftsjahres                     | - 5.533        | - 529         | - 6.095        | - 516         |
| Noch unberücksichtigter nachzuverrechnender Dienstzeitaufwand       | 0              | 0             | 0              | 5             |
| Effekte aus „asset ceiling“                                         | 0              | - 1           | 0              | - 62          |
| <b>Bilanzierter Betrag</b>                                          | <b>- 5.533</b> | <b>- 530</b>  | <b>- 6.095</b> | <b>- 573</b>  |
| Der bilanzierte Betrag verteilt sich auf folgende Bilanzpositionen: |                |               |                |               |
| Sonstige nicht finanzielle Vermögenswerte                           | 0              | 5             | 0              | 1             |
| Pensionsrückstellungen                                              | - 5.533        | - 535         | - 6.095        | - 574         |
| <b>Bilanzierter Betrag</b>                                          | <b>- 5.533</b> | <b>- 530</b>  | <b>- 6.095</b> | <b>- 573</b>  |

### Netto-Pensionsaufwendungen

Die Netto-Pensionsaufwendungen für Leistungszusagen setzen sich wie folgt zusammen:

Mio €

|                                                                                      | 2008/2009   |               | 2009/2010   |               |
|--------------------------------------------------------------------------------------|-------------|---------------|-------------|---------------|
|                                                                                      | Deutschland | Übrige Länder | Deutschland | Übrige Länder |
| Dienstzeitaufwand: Barwert der im Geschäftsjahr hinzuverdienten Versorgungsansprüche | 60          | 25            | 69          | 31            |
| Zinsaufwand: Aufzinsung der bereits erworbenen Ansprüche                             | 324         | 120           | 287         | 111           |
| Erwarteter Kapitalertrag des Planvermögens                                           | - 11        | - 102         | - 13        | - 106         |
| Nachzuverrechnender Dienstzeitaufwand                                                | 22          | 0             | 2           | 7             |
| Aufwand/(Ertrag) aus Plankürzungen und Planabgeltungen                               | 0           | - 7           | 0           | - 1           |
| Aufwand aus Leistungen aus Anlass der Beendigung des Arbeitsverhältnisses            | 8           | 8             | 0           | 0             |
| <b>Netto-Pensionsaufwendungen für Leistungszusagen</b>                               | <b>403</b>  | <b>44</b>     | <b>345</b>  | <b>42</b>     |

### Bewertungsannahmen

Die Ansätze für die Diskontierungssätze und die Gehaltssteigerungsraten, die der Berechnung des Verpflichtungsumfangs zu Grunde liegen, wurden nach einheitlichen Grundsätzen abgeleitet und pro Land in Abhängigkeit von den jeweiligen ökonomischen Gegebenheiten festgesetzt. Zur Ableitung der Diskontierungssätze wird dabei grundsätzlich auf Renditen erstrangiger, festverzinslicher Unternehmensanleihen in den jeweiligen Ländern zurückgegriffen, deren Laufzeiten mit den Fristigkeiten der nach Beendigung der Arbeitsverhältnisse zu erfüllenden Verpflichtungen übereinstimmen. Die

Annahmen über den erwarteten Kapitalertrag auf das Planvermögen beruhen auf detaillierten Analysen, die von externen Finanzexperten und Versicherungsmathematikern durchgeführt werden. Diese Analysen berücksichtigen sowohl die historischen Ist-Renditen langfristiger Anlagen als auch die für das Ziel-Portfolio künftig erwarteten langfristigen Renditen.

Bei der Berechnung der Pensionsverpflichtungen wurden folgende Annahmen (= gewichteter Durchschnitt) zu Grunde gelegt:

in %

|                                               | 30.09.2009  |               | 30.09.2010  |               |
|-----------------------------------------------|-------------|---------------|-------------|---------------|
|                                               | Deutschland | Übrige Länder | Deutschland | Übrige Länder |
| Durchschnittliche Bewertungsfaktoren:         |             |               |             |               |
| Diskontierungssatz                            | 5,25        | 5,24          | 4,10        | 4,47          |
| Erwarteter Kapitalertrag auf das Planvermögen | 6,00        | 7,00          | 6,00        | 6,73          |
| Langfristige Gehaltssteigerungsraten          | 2,50        | 1,91          | 2,50        | 1,86          |



### Planvermögen

Die Mehrzahl der fondsfinanzierten Pensionspläne des Konzerns befindet sich in den USA, in Kanada, in Großbritannien und zu einem geringeren Umfang in Deutschland sowie einigen anderen europäischen Ländern. Das Planvermögen ist in diversifizierte Portfolios investiert, welche jeweils verschiedene Anlageklassen umfassen. Hiermit soll eine unter Risiko- und Rendite-Aspekten optimale Aufteilung der Anlageklassen erreicht werden. Die Anlageklassen der Fonds umfassen nationale und internationale Aktien, festverzinsliche Wertpapiere staatlicher und nicht-staatlicher Emittenten sowie Immobilienvermögen. Das Planvermögen der Pensionspläne enthält keine Gläubigerpapiere oder Aktien sowie kein Immobilienvermögen von ThyssenKrupp.

Bei der Anlage des Planvermögens bedient sich der Konzern professioneller Investmentmanager. Diese agieren auf Basis spezifischer Investitionsrichtlinien, die vom Investitionsausschuss des jeweiligen Plans erlassen worden sind. Die Investitionsausschüsse setzen sich aus leitenden Mitarbeitern des Finanzbereichs und anderen qualifizierten Führungskräften zusammen. Sie tagen regelmäßig, um das Ziel-Portfolio zu genehmigen sowie die Risiken und die Performance wesentlicher Pensionsfonds zu überprüfen; darüber hinaus bewilligen sie die Auswahl bzw. die Vertragsverlängerung externer Fondsmanager.

Die Struktur des Konzern-Zielportfolios basiert auf Asset-Liability-Studien, die für die wesentlichen Pensionsfonds des Konzerns regelmäßig durchgeführt werden.

Die Struktur des Ist-Portfolios und des Ziel-Portfolios des Planvermögens der Pensionspläne stellt sich wie folgt dar:

|                              | Ist-Portfoliostruktur<br>des Planvermögens |             | Ziel-Portfolio-<br>struktur |
|------------------------------|--------------------------------------------|-------------|-----------------------------|
|                              | 30.09.2009                                 | 30.09.2010  | 30.09.2011                  |
| Aktien                       | 39%                                        | 35%         | 30-45%                      |
| Festverzinsliche Wertpapiere | 54%                                        | 56%         | 45-60%                      |
| Immobilien/Sonstiges         | 7%                                         | 9%          | 0-10%                       |
| <b>Insgesamt</b>             | <b>100%</b>                                | <b>100%</b> |                             |

### Mehrjahresübersicht

Folgende Beträge wurden für die laufende Berichtsperiode und die vorangegangenen Berichtsperioden für die leistungsorientierten Pläne angesetzt:

| Mio €                                                       | 30.09.2006 | 30.09.2007 | 30.09.2008 | 30.09.2009 | 30.09.2010 |
|-------------------------------------------------------------|------------|------------|------------|------------|------------|
| Anwartschaftsbarwert                                        | 8.655      | 7.931      | 6.938      | 7.754      | 8.664      |
| Beizulegender Zeitwert des Planvermögens                    | 2.067      | 2.077      | 1.724      | 1.692      | 2.053      |
| Überschuss bzw. Fehlbetrag der Pläne                        | - 6.588    | - 5.854    | - 5.214    | - 6.062    | - 6.611    |
| Erfahrungsbedingte Anpassungen der Schulden der Pläne       | - 52       | - 89       | - 47       | 25         | 65         |
| Erfahrungsbedingte Anpassungen der Vermögenswerte der Pläne | 13         | 44         | - 345      | - 23       | 60         |

Grundsätzlich dotiert der Konzern die Pensionsfonds in Höhe des Betrags, der erforderlich ist, um die gesetzlichen Minimalzuführungserfordernisse des jeweiligen Landes, in dem der Fonds ansässig ist, zu erfüllen. In den USA und in Kanada richtet sich die Minimaldotierung einiger Fonds nach gewerkschaftlichen Regelungen. Darüber hinaus leistet der Konzern von Zeit zu Zeit nach eigenem Ermessen zusätzliche Zuführungen. Für das Geschäftsjahr 2010/2011 erwartet ThyssenKrupp Bar-Dotierungen zu den fondsfinanzierten Pensionsplänen in Höhe von 80 Mio €.

### Pensionszahlungen

Im Geschäftsjahr 2009/2010 wurden Pensionszahlungen für Pläne in Deutschland von 418 (i. Vj. 421) Mio € und für Pläne in den übrigen Ländern von 151 (i. Vj. 157) Mio € geleistet. In den kommenden 10 Geschäftsjahren werden aus den Pensionsplänen folgende Zahlungen erwartet:

| Mio €                    | Deutschland  | Übrige Länder |
|--------------------------|--------------|---------------|
| (für die Geschäftsjahre) |              |               |
| 2010/2011                | 434          | 137           |
| 2011/2012                | 432          | 139           |
| 2012/2013                | 430          | 133           |
| 2013/2014                | 426          | 134           |
| 2014/2015                | 424          | 138           |
| 2015/2016-2019/2020      | 2.039        | 701           |
| <b>Insgesamt</b>         | <b>4.185</b> | <b>1.382</b>  |



### Beitragsorientierte Pläne (defined contribution plans)

Darüber hinaus gewährt der Konzern im In- und Ausland Beitragszusagen im Rahmen der betrieblichen Altersversorgung über Pensionskassen und vergleichbare Versorgungseinrichtungen. Der Konzern erbringt für diese Pläne Beitragsleistungen in Höhe eines bestimmten Prozentsatzes vom Einkommen der Mitarbeiter oder in Abhängigkeit von der Höhe der Beitragsleistungen der Mitarbeiter. Der Gesamtaufwand aus als beitragsorientierte Pläne bilanzierten Pensionszusagen betrug im Geschäftsjahr 119 (i. Vj. 140) Mio €. Davon entfielen 78 (i. Vj. 84) Mio € auf gemeinschaftlich mit nicht verbundenen Unternehmen unterhaltene Pensionspläne (multi employer plans). Zusätzlich wurden Beiträge an staatliche Rentenversicherungsträger von 603 (i. Vj. 617) Mio € gezahlt.

### Gesundheitsfürsorgeverpflichtungen

In den USA und Kanada gewährt der Konzern Gesundheitsfürsorgeleistungen und Lebensversicherungsleistungen an Pensionäre, die bestimmte Mindestanforderungen hinsichtlich ihres Lebens- und Dienstalters erfüllen. Die Verpflichtungen entfallen überwiegend auf den Auslaufbereich von ThyssenKrupp Budd.

Im Dezember 2003 hat die US-Regierung das Gesetz „Medicare Prescription Drug, Improvement and Modernization Act“ in Kraft gesetzt. Durch das Gesetz erhalten Unternehmen, die Gesundheitsfürsorgeleistungen an Pensionäre gewähren, deren Leistungsumfang mindestens der gesetzlichen Regelung entspricht, einen staatlichen Zuschuss. Der Konzern bilanziert diese staatlichen Zuschüsse in Übereinstimmung mit IAS 19 als sogenannte Reimbursement Rights.

### Veränderung des Anwartschaftsbarwerts und der Erstattungsansprüche (reimbursement rights)

Die Veränderung des Anwartschaftsbarwertes der Gesundheitsfürsorgeverpflichtungen sowie der Erstattungsansprüche stellt sich wie folgt dar:

| Mio €                                                                                                       | 30.09.2009<br>USA/Kanada | 30.09.2010<br>USA/Kanada |
|-------------------------------------------------------------------------------------------------------------|--------------------------|--------------------------|
| <b>Veränderung des Anwartschaftsbarwerts:</b>                                                               |                          |                          |
| Anwartschaftsbarwert am Anfang des Geschäftsjahres                                                          | 1.013                    | 1.040                    |
| Dienstzeitaufwand: Barwert der im Geschäftsjahr hinzuverdienenden Ansprüche                                 | 8                        | 6                        |
| Zinsaufwand: Aufzinsung der erwarteten Zuschussverpflichtungen                                              | 66                       | 58                       |
| Nachzuverrechnender Dienstzeitaufwand                                                                       | – 53                     | – 52                     |
| Versicherungsmathematische (Gewinne)/Verluste                                                               | 109                      | 102                      |
| Plankürzungen und Planabgeltungen                                                                           | – 24                     | 0                        |
| Kursdifferenzen                                                                                             | – 33                     | 81                       |
| Zahlungen für Versorgungsverpflichtungen                                                                    | – 46                     | – 47                     |
| <b>Anwartschaftsbarwert am Ende des Geschäftsjahres</b>                                                     | <b>1.040</b>             | <b>1.188</b>             |
| <b>Veränderung der Erstattungsansprüche im Zusammenhang mit Gesundheitsfürsorgezuschussverpflichtungen:</b> |                          |                          |
| Beizulegender Zeitwert der Erstattungsansprüche am Anfang des Geschäftsjahres                               | 83                       | 76                       |
| Erwartete Erträge aus Erstattungsansprüchen                                                                 | – 4                      | 5                        |
| Versicherungsmathematische Gewinne/(Verluste)                                                               | 1                        | 12                       |
| Beiträge der Arbeitgeber                                                                                    | 3                        | 0                        |
| Kursdifferenzen                                                                                             | – 1                      | 6                        |
| Gezahlte Leistungen                                                                                         | – 6                      | – 5                      |
| Sonstige                                                                                                    | 0                        | 0                        |
| <b>Beizulegender Zeitwert der Erstattungsansprüche am Ende des Geschäftsjahres</b>                          | <b>76</b>                | <b>94</b>                |

### Finanzierungsstatus und bilanzierter Betrag

Die nachfolgende Tabelle zeigt den Finanzierungsstatus einschließlich der Überleitung zum Bilanzausweis:

| Mio €                                                                                | 30.09.2009<br>USA/Kanada | 30.09.2010<br>USA/Kanada |
|--------------------------------------------------------------------------------------|--------------------------|--------------------------|
| Finanzierungsstatus am Ende des Geschäftsjahres                                      | – 1.040                  | – 1.188                  |
| Noch unberücksichtigter nachzuverrechnender Dienstzeitaufwand                        | – 36                     | – 69                     |
| <b>Bilanzierter Betrag (= Rückstellungen für Gesundheitsfürsorgeverpflichtungen)</b> | <b>– 1.076</b>           | <b>– 1.257</b>           |



### Netto-Aufwendungen für Gesundheitsfürsorgeleistungen

Die Netto-Aufwendungen für die Gesundheitsfürsorgeleistungen für Pensionäre setzen sich wie folgt zusammen:

| Mio €                                                                                                  | 30.09.2009<br>USA/Kanada | 30.09.2010<br>USA/Kanada |
|--------------------------------------------------------------------------------------------------------|--------------------------|--------------------------|
| Dienstzeitaufwand: Barwert der im Geschäftsjahr hinzuverdienten Versorgungsansprüche                   | 8                        | 6                        |
| Zinsaufwand: Aufzinsung der bereits erworbenen Ansprüche                                               | 66                       | 58                       |
| Erwarteter Ertrag aus Erstattungsansprüchen                                                            | 4                        | - 5                      |
| Nachzuverrechnender Dienstzeitaufwand                                                                  | - 31                     | - 21                     |
| Aufwand/(Ertrag) aus Plankürzungen und Planabgeltungen                                                 | - 24                     | 0                        |
| <b>Netto-Aufwendungen der Zuschussverpflichtungen für Gesundheitsfürsorgeleistungen für Pensionäre</b> | <b>23</b>                | <b>38</b>                |

### Bewertungsannahmen

Bei der Berechnung der Gesundheitsfürsorgeverpflichtungen wurden folgende Annahmen zu Grunde gelegt (= gewichteter Durchschnitt):

| in %                                                              | 30.09.2009<br>USA/Kanada | 30.09.2010<br>USA/Kanada |
|-------------------------------------------------------------------|--------------------------|--------------------------|
| Durchschnittliche Bewertungsfaktoren:                             |                          |                          |
| Diskontierungssatz                                                | 5,50                     | 4,77                     |
| Steigerungsrate für Gesundheitsfürsorge im nächsten Jahr          | 9,80                     | 9,78                     |
| Letzte Steigerungsrate für Gesundheitsfürsorge (erwartet in 2032) | 5,00                     | 5,00                     |

Nachfolgend sind die Auswirkungen dargestellt, die aus einer Erhöhung bzw. Verminderung der angenommenen Steigerungsrate für die Gesundheitsfürsorgeleistungen um 1 %-Punkt resultieren:

| Mio €                                           | 1 % - Punkt |              |
|-------------------------------------------------|-------------|--------------|
|                                                 | Erhöhung    | Verminderung |
| Effekt auf die Dienstzeit- und Zinsaufwendungen | 7           | - 6          |
| Effekt auf den Anwartschaftsbarwert             | 167         | - 137        |

### Mehrjahresübersicht

Folgende Beträge wurden für die laufende Berichtsperiode und die vorangegangenen Berichtsperioden für die Gesundheitsfürsorgeverpflichtungen angesetzt:

| Mio €                                                   | 30.09.2006 | 30.09.2007 | 30.09.2008 | 30.09.2009 | 30.09.2010 |
|---------------------------------------------------------|------------|------------|------------|------------|------------|
| Anwartschaftsbarwert                                    | 1.122      | 893        | 1.013      | 1.040      | 1.188      |
| Beizulegender Zeitwert des Erstattungsanspruchs         | 90         | 67         | 83         | 76         | 94         |
| Überschuss bzw. Fehlbetrag der Pläne                    | - 1.122    | - 893      | - 1.013    | - 1.040    | - 1.188    |
| Erfahrungsbedingte Anpassungen der Schulden der Pläne   | - 33       | 13         | - 41       | - 1        | 11         |
| Erfahrungsbedingte Anpassungen des Erstattungsanspruchs | 31         | 0          | 0          | 1          | 1          |

### Sonstige pensionsähnliche Verpflichtungen

Insbesondere bei deutschen Gesellschaften bestehen Verpflichtungen aus Altersteilzeitvereinbarungen. Hierbei erbringt der Arbeitnehmer Vorleistungen durch Mehrarbeit, die nach dem Ausscheiden durch ratierliche Zahlungen entgolten werden. Für die Verpflichtungen wurden Rückstellungen nach IAS 19 „Employee Benefits“ in Höhe von 209 (i. Vj. 283) Mio € angesetzt.



## 16 Sonstige Rückstellungen

Mio €

|                                                                                                                           | Gewähr-<br>leistungs-<br>und Produkt-<br>haftungs-<br>verpflich-<br>tungen | Sonstige<br>absatz- und<br>beschaf-<br>fungsmarkt-<br>bezogene<br>Risiken | Verpflich-<br>tungen im<br>Personal-<br>bereich | Restruktu-<br>rierungen | Entfernungs-<br>verpflich-<br>tungen | Umwelt-<br>schutz-<br>verpflich-<br>tungen | Prozess-<br>risiken | Sonstige   | Insgesamt    | nachricht-<br>lich:<br>Darstellung<br>Disposal<br>Groups |
|---------------------------------------------------------------------------------------------------------------------------|----------------------------------------------------------------------------|---------------------------------------------------------------------------|-------------------------------------------------|-------------------------|--------------------------------------|--------------------------------------------|---------------------|------------|--------------|----------------------------------------------------------|
| <b>Stand 30.09.2009</b>                                                                                                   | <b>433</b>                                                                 | <b>310</b>                                                                | <b>521</b>                                      | <b>715</b>              | <b>235</b>                           | <b>34</b>                                  | <b>182</b>          | <b>402</b> | <b>2.832</b> | <b>64</b>                                                |
| Währungsunterschiede                                                                                                      | 23                                                                         | 9                                                                         | 14                                              | 3                       | 0                                    | 0                                          | 7                   | 8          | 64           | 5                                                        |
| Veränderung<br>Konsolidierungskreis                                                                                       | - 48                                                                       | - 13                                                                      | 42                                              | - 23                    | 1                                    | 1                                          | - 7                 | 64         | 17           | - 47                                                     |
| Zuführungen                                                                                                               | 178                                                                        | 146                                                                       | 262                                             | 93                      | 2                                    | 1                                          | 69                  | 191        | 942          | 13                                                       |
| Aufzinsung                                                                                                                | 0                                                                          | 0                                                                         | 0                                               | 10                      | - 1                                  | 2                                          | 2                   | 2          | 15           | 0                                                        |
| Inanspruchnahmen                                                                                                          | - 60                                                                       | - 122                                                                     | - 247                                           | - 244                   | - 9                                  | - 3                                        | - 28                | - 101      | - 814        | - 35                                                     |
| Auflösungen                                                                                                               | - 61                                                                       | - 62                                                                      | - 28                                            | - 124                   | - 15                                 | - 3                                        | - 23                | - 73       | - 389        | 0                                                        |
| Umgliederung w/Ausweis<br>als Verbindlichkeiten in<br>Verbindung mit zur Ver-<br>äußerung vorgesehenen<br>Vermögenswerten | - 13                                                                       | 0                                                                         | - 7                                             | - 5                     | - 1                                  | 0                                          | - 33                | - 1        | - 60         | 60                                                       |
| <b>Stand 30.09.2010</b>                                                                                                   | <b>452</b>                                                                 | <b>268</b>                                                                | <b>557</b>                                      | <b>425</b>              | <b>212</b>                           | <b>32</b>                                  | <b>169</b>          | <b>492</b> | <b>2.607</b> | <b>60</b>                                                |

Vom Gesamtbetrag der sonstigen Rückstellungen zum 30. September 2010 sind 1.778 (i. Vj. 2.040) Mio € kurzfristig und 829 (i. Vj. 792) Mio € langfristig. Sonstige Rückstellungen in Höhe von 613 (i. Vj. 711) Mio € haben eine Restlaufzeit von mehr als einem Jahr.

Die Rückstellung für Gewährleistungs- und Produkthaftungsverpflichtungen umfasst sowohl die Haftung des Konzerns für die einwandfreie Funktionalität der verkauften Produkte (Gewährleistung) als auch die Verpflichtung, dem Käufer durch den Gebrauch der Produkte entstandene Schäden zu ersetzen (Produkthaftung).

Die Rückstellung für sonstige absatz- und beschaffungsmarktbezogene Risiken besteht im Wesentlichen für drohende Verluste aus schwebenden Geschäften.

Mit den Rückstellungen für Verpflichtungen im Personalbereich werden vor allem Jubiläumszuwendungen und Verpflichtungen aus den Management Incentiveplänen erfasst, während Sozialplan- und ähnliche Aufwendungen in der Rückstellung für Restrukturierungen innerhalb der Personalstrukturmaßnahmen berücksichtigt sind. Pensionsähnliche Verpflichtungen wie Altersteilzeit- und Vorruhestandsregelungen, die zum Teil auch im Rahmen von Restrukturierungsmaßnahmen entstanden sind, sind Bestandteil der Rückstellung für Pensionen und ähnliche Verpflichtungen.

Die Restrukturierungsrückstellung umfasst neben den rückstellungsfähigen Personalstrukturmaßnahmen auch Rückstellungen für Sachstrukturmaßnahmen, die im Rahmen der Aufgabe von betrieblichen Bereichen für Kosten gebildet werden, die aus Maßnahmen

resultieren, die keinen zukünftigen wirtschaftlichen Nutzen generieren. Mit Ausnahme von Steel Americas werden in allen Business Areas Restrukturierungsmaßnahmen durchgeführt. Von den Rückstellungen zum 30. September 2010 entfallen 144 Mio € auf die Business Area Steel Europe, 121 Mio € auf die Business Area Components Technology sowie 58 Mio € auf die Business Area Stainless Global. Die im Geschäftsjahr erfassten Auflösungen von Restrukturierungsrückstellungen in Höhe von 124 Mio € resultieren aus Anpassungen der geplanten Restrukturierungsmaßnahmen auf Grund von Konkretisierungen der Maßnahmen während der Umsetzung und auf Grund von sich im Geschäftsjahr neu ergebenden Handlungsalternativen.

Die Rückstellung für Entfernungsverpflichtungen besteht im Wesentlichen aus Verpflichtungen zur Sicherung entstandener Bergschäden und für Rekultivierungsmaßnahmen. Die Abwicklung von Bergschäden und Rekultivierungsverpflichtungen erstreckt sich typischerweise über lange Zeiträume von teilweise mehr als 30 Jahren. Die technischen Rahmenbedingungen sind als sehr komplex einzuschätzen. Entsprechend bestehen Unsicherheiten über den zeitlichen Anfall und die konkrete Höhe der Aufwendungen.

Die Rückstellungen für Umweltschutzverpflichtungen betreffen vor allem die Beseitigung von Altlasten sowie Sanierungs- und Gewässerschutzmaßnahmen.



# 17 Finanzschulden

## BUCHWERTE Mio €

|                                              | 30.09.2009   | 30.09.2010   |
|----------------------------------------------|--------------|--------------|
| Anleihen                                     | 4.483        | 3.736        |
| Schuldscheindarlehen                         | 479          | 479          |
| Verbindlichkeiten gegenüber Kreditinstituten | 2.003        | 1.846        |
| Verbindlichkeiten aus Finance Lease          | 70           | 64           |
| Sonstige Darlehen                            | 125          | 32           |
| <b>Langfristige Finanzschulden</b>           | <b>7.160</b> | <b>6.157</b> |
| Anleihen                                     | 0            | 749          |
| Verbindlichkeiten gegenüber Kreditinstituten | 242          | 376          |
| Akzeptverbindlichkeiten                      | 19           | 18           |
| Verbindlichkeiten aus Finance Lease          | 34           | 23           |
| Sonstige Darlehen                            | 10           | 112          |
| <b>Kurzfristige Finanzschulden</b>           | <b>305</b>   | <b>1.278</b> |
| <b>Finanzschulden</b>                        | <b>7.465</b> | <b>7.435</b> |

Die kurzfristigen Finanzschulden beinhalten Finanzschulden mit einer Restlaufzeit von bis zu einem Jahr, während die langfristigen Finanzschulden eine Restlaufzeit von mehr als einem Jahr haben.

Finanzschulden in Höhe von 100 (i. Vj. 129) Mio € sind durch Grundpfandrechte besichert.

Per 30. September 2010 sind von den Finanzschulden insgesamt Disagien in Höhe von 24 (i. Vj. 30) Mio € abgesetzt und Agien in Höhe von 8 (i. Vj. 12) Mio € aufgeschlagen. Die Verrechnung der Disagien und Agien ist im Finanzergebnis enthalten.

Im Rahmen des Ausweises von Disposal Groups wurden Finanzschulden von 26 (i. Vj. 139) Mio € in die Bilanzposition „Verbindlichkeiten in Verbindung mit zur Veräußerung vorgesehenen Vermögenswerten“ umgegliedert.

## ANLEIHEN, SCHULDSCHEINDARLEHEN

|                                                                     | Buchwert<br>in Mio €<br>30.09.2009 | Buchwert<br>in Mio €<br>30.09.2010 | Nominalwert<br>in Mio €<br>30.09.2010 | Zinssatz<br>in % | Beizulegender<br>Zeitwert<br>in Mio €<br>30.09.2010 | Fälligkeit |
|---------------------------------------------------------------------|------------------------------------|------------------------------------|---------------------------------------|------------------|-----------------------------------------------------|------------|
| Anleihe ThyssenKrupp Finance Nederland B.V. (1.000 Mio €) 2009/2013 | 1.009                              | 1.006                              | 1.000                                 | 6,750            | 1.081                                               | 25.02.2013 |
| Anleihe ThyssenKrupp Finance Nederland B.V. (1.000 Mio €) 2009/2016 | 988                                | 990                                | 1.000                                 | 8,500            | 1.173                                               | 25.02.2016 |
| Anleihe ThyssenKrupp AG (750 Mio €) 2004/2011                       | 749                                | 749                                | 750                                   | 5,000            | 762                                                 | 29.03.2011 |
| Anleihe ThyssenKrupp AG (1.000 Mio €) 2009/2014                     | 988                                | 991                                | 1.000                                 | 8,000            | 1.136                                               | 18.06.2014 |
| Anleihe ThyssenKrupp AG (750 Mio €) 2005/2015                       | 749                                | 749                                | 750                                   | 4,375            | 782                                                 | 18.03.2015 |
| Schuldscheindarlehen ThyssenKrupp AG (100 Mio €) 2008/2013          | 100                                | 100                                | 100                                   | 5,150            | 107                                                 | 15.04.2013 |
| Schuldscheindarlehen ThyssenKrupp AG (150 Mio €) 2008/2013          | 149                                | 149                                | 150                                   | 5,300            | 160                                                 | 25.04.2013 |
| Schuldscheindarlehen ThyssenKrupp AG (150 Mio €) 2008/2014          | 150                                | 150                                | 150                                   | 5,375            | 160                                                 | 21.05.2014 |
| Schuldscheindarlehen ThyssenKrupp AG (80 Mio €) 2008/2016           | 80                                 | 80                                 | 80                                    | 5,710            | 84                                                  | 15.09.2016 |
| <b>Insgesamt</b>                                                    | <b>4.962</b>                       | <b>4.964</b>                       | <b>4.980</b>                          |                  | <b>5.445</b>                                        |            |

Die ThyssenKrupp AG hat für alle Anleihen der ThyssenKrupp Finance Nederland B.V. jeweils eine unbedingte und unwiderrufliche Garantie für die Zahlungsverpflichtungen gemäß den Anleihebedingungen übernommen.

Per 30. September 2010 stellt sich die Finanzierungsstruktur der Verbindlichkeiten gegenüber Kreditinstituten und der Sonstigen Darlehen wie folgt dar:

## VERBINDLICHKEITEN GEGENÜBER KREDITINSTITUTEN, SONSTIGE DARLEHEN

|                                                           | Buchwert<br>in Mio €<br>30.09.2009 | Buchwert<br>in Mio €<br>30.09.2010 | davon<br>in € | Gewogener<br>Durch-<br>schnitts-<br>zinssatz<br>in % per<br>30.09.2010 | davon<br>in USD | Gewogener<br>Durch-<br>schnitts-<br>zinssatz<br>in % per<br>30.09.2010 | davon in<br>weiteren<br>Währungen | Beizu-<br>legender<br>Zeitwert<br>in Mio €<br>30.09.2010 |
|-----------------------------------------------------------|------------------------------------|------------------------------------|---------------|------------------------------------------------------------------------|-----------------|------------------------------------------------------------------------|-----------------------------------|----------------------------------------------------------|
| Bilaterale Kreditvereinbarungen<br>(variabel verzinslich) | 510                                | —                                  | —             | —                                                                      | —               | —                                                                      | —                                 | —                                                        |
| Sonstige variabel verzinsliche<br>Kredite                 | 960                                | 1.236                              | 80            | 2,40                                                                   | 295             | 2,28                                                                   | 861                               | 1.236                                                    |
| Festverzinsliche Kredite                                  | 910                                | 1.130                              | 874           | 5,52                                                                   | 11              | 7,09                                                                   | 245                               | 1.163                                                    |
| <b>Insgesamt</b>                                          | <b>2.380</b>                       | <b>2.366</b>                       | <b>954</b>    | <b>5,25</b>                                                            | <b>306</b>      | <b>2,45</b>                                                            | <b>1.106</b>                      | <b>2.399</b>                                             |



Aus einer syndizierten Kreditfazilität (Multi-Currency-Facility-Agreement) stehen ThyssenKrupp variabel verzinsliche Mittel in Höhe von 2,5 Mrd € zur Verfügung. Die Fazilität wurde im Juli 2005 abgeschlossen und hat eine Laufzeit bis zum 01. Juli 2014. Die Kreditfazilität war am Bilanzstichtag nicht in Anspruch genommen.

Des Weiteren hat die ThyssenKrupp AG mit ihren Finanzpartnern bilaterale Vereinbarungen in Höhe von 2,2 Mrd € getroffen, denen zufolge sie, aber auch teilweise die ThyssenKrupp Finance USA, Inc. oder die ThyssenKrupp Finance Nederland B.V. Kredite in Euro oder wahlweise in US-Dollar oder Britischem Pfund revolving in Anspruch nehmen kann (Roll-Over-Finanzierungen). Von diesen

bilateralen Kreditlinien haben rd. 54 % eine Restlaufzeit von über 5 Jahren und rd. 46 % eine Restlaufzeit von bis zu 5 Jahren. Am Bilanzstichtag waren diese Kreditlinien nicht durch Barkredite in Anspruch genommen. Insgesamt verfügt der Konzern über ungenutzte und fest zugesagte Kreditlinien in Höhe von 4,7 Mrd €. Die zehn größten Banken stellen zusammen einen Anteil von 53 %.

Darüber hinaus verfügt der Konzern über weitere Finanzierungsmöglichkeiten im Rahmen eines Commercial Paper Programms mit einem maximalen Emissionsvolumen von 1,5 Mrd €, das zum 30. September 2010 ebenfalls nicht in Anspruch genommen war.

Für Finance-Lease-Verträge betragen die zukünftigen Mindestzahlungen zum Stichtag:

Mio €

|                                     | 30.09.2009                                    |           |                                                             | 30.09.2010                                    |           |                                                             |
|-------------------------------------|-----------------------------------------------|-----------|-------------------------------------------------------------|-----------------------------------------------|-----------|-------------------------------------------------------------|
|                                     | Künftige<br>Mindest-<br>leasing-<br>zahlungen | Zinsen    | Barwert<br>(Verbindlich-<br>keiten aus<br>Finance<br>Lease) | Künftige<br>Mindest-<br>leasing-<br>zahlungen | Zinsen    | Barwert<br>(Verbindlich-<br>keiten aus<br>Finance<br>Lease) |
| Bis zu einem Jahr                   | 40                                            | 6         | 34                                                          | 29                                            | 6         | 23                                                          |
| Zwischen einem Jahr und fünf Jahren | 64                                            | 11        | 53                                                          | 58                                            | 13        | 45                                                          |
| Länger als fünf Jahre               | 22                                            | 5         | 17                                                          | 24                                            | 5         | 19                                                          |
| <b>Insgesamt</b>                    | <b>126</b>                                    | <b>22</b> | <b>104</b>                                                  | <b>111</b>                                    | <b>24</b> | <b>87</b>                                                   |

Die Fälligkeiten der Finanzschulden verteilen sich wie folgt auf die nächsten 5 Jahre und die Zeit danach:

Mio €

|                          | Gesamte<br>Finanzschulden | Davon:<br>Verbindlichkeiten<br>gegenüber<br>Kreditinstituten |
|--------------------------|---------------------------|--------------------------------------------------------------|
| (für die Geschäftsjahre) |                           |                                                              |
| 2010/2011                | 1.278                     | 376                                                          |
| 2011/2012                | 278                       | 238                                                          |
| 2012/2013                | 1.825                     | 561                                                          |
| 2013/2014                | 1.683                     | 526                                                          |
| 2014/2015                | 937                       | 177                                                          |
| nach 2014/2015           | 1.434                     | 344                                                          |
| <b>Insgesamt</b>         | <b>7.435</b>              | <b>2.222</b>                                                 |

## 18 Verbindlichkeiten aus Lieferungen und Leistungen

Verbindlichkeiten aus Lieferungen und Leistungen in Höhe von 45 (i. Vj. 41) Mio € haben eine Restlaufzeit von mehr als einem Jahr.



## 19 Sonstige finanzielle Verbindlichkeiten

Mio €

|                                                                             | 30.09.2009   |             | 30.09.2010   |             |
|-----------------------------------------------------------------------------|--------------|-------------|--------------|-------------|
|                                                                             | kurzfristig  | langfristig | kurzfristig  | langfristig |
| Zu fortgeführten Anschaffungskosten bewertete finanzielle Verbindlichkeiten | 1.389        | 4           | 1.437        | 0           |
| Derivate ohne bilanzielle Sicherungsbeziehung                               | 138          | —           | 137          | —           |
| Derivate mit bilanzieller Sicherungsbeziehung                               | 58           | —           | 67           | —           |
| <b>Insgesamt</b>                                                            | <b>1.585</b> | <b>4</b>    | <b>1.641</b> | <b>0</b>    |

Sonstige finanzielle Verbindlichkeiten in Höhe von 2 (i. Vj. 8) Mio € haben eine Restlaufzeit von mehr als einem Jahr.

## 20 Sonstige nicht finanzielle Verbindlichkeiten

Mio €

|                                                            | 30.09.2009   |             | 30.09.2010   |             |
|------------------------------------------------------------|--------------|-------------|--------------|-------------|
|                                                            | kurzfristig  | langfristig | kurzfristig  | langfristig |
| Fertigungsaufträge mit passivischem Saldo gegenüber Kunden | 2.883        | —           | 3.112        | —           |
| Erhaltene Anzahlungen                                      | 956          | —           | 1.049        | —           |
| Absatz- und beschaffungsmarktbezogene Verbindlichkeiten    | 725          | —           | 798          | —           |
| Verbindlichkeiten aus Put-Optionen                         | 22           | —           | 13           | —           |
| Verbindlichkeiten gegenüber der Belegschaft                | 717          | —           | 793          | —           |
| Verbindlichkeiten im Rahmen der sozialen Sicherheit        | 99           | —           | 93           | —           |
| Rechnungsabgrenzungsposten                                 | 117          | —           | 49           | —           |
| Verbindlichkeiten aus Steuern (ohne Ertragsteuern)         | 347          | —           | 329          | —           |
| Übrige                                                     | 790          | 46          | 670          | 23          |
| <b>Insgesamt</b>                                           | <b>6.656</b> | <b>46</b>   | <b>6.906</b> | <b>23</b>   |

Sonstige nicht finanzielle Verbindlichkeiten in Höhe von 347 (i. Vj. 506) Mio € haben eine Restlaufzeit von mehr als einem Jahr.

Die aus der Bilanzierung von Fertigungsaufträgen resultierenden Verbindlichkeiten setzen sich wie folgt zusammen:

Mio €

|                                                                                                | 30.09.2009     | 30.09.2010     |
|------------------------------------------------------------------------------------------------|----------------|----------------|
| Angefallene Auftragskosten und ausgewiesene Auftragsgewinne (abzüglich ausgewiesener Verluste) | 5.881          | 7.086          |
| abzüglich erhaltener Anzahlungen                                                               | – 8.764        | – 10.198       |
| <b>Insgesamt</b>                                                                               | <b>– 2.883</b> | <b>– 3.112</b> |



## 21 Eventualverbindlichkeiten, sonstige finanzielle Verpflichtungen und andere Risiken

### Eventualverbindlichkeiten

Die ThyssenKrupp AG sowie in Einzelfällen auch Tochtergesellschaften haben Bürgschaften oder Garantien zu Gunsten von Auftraggebern oder Kreditgebern ausgestellt bzw. ausstellen lassen. Die in der

nachfolgenden Tabelle dargestellten Verpflichtungen zeigen Haftungsverhältnisse, bei denen der Hauptschuldner kein konsolidiertes Unternehmen ist:

Mio €

|                                                  | Maximales Haftungsvolumen |            | Rückstellung |            |
|--------------------------------------------------|---------------------------|------------|--------------|------------|
|                                                  | 30.09.2009                | 30.09.2010 | 30.09.2009   | 30.09.2010 |
| Anzahlungsgarantien                              | 231                       | 201        | 1            | 1          |
| Gewährleistungs- und Vertragserfüllungsgarantien | 80                        | 82         | 0            | 1          |
| Kreditaufträge                                   | 39                        | 40         | 0            | 0          |
| Restwertgarantien                                | 45                        | 45         | 1            | 1          |
| Sonstige Haftungserklärungen                     | 48                        | 45         | 2            | 0          |
| <b>Insgesamt</b>                                 | <b>443</b>                | <b>413</b> | <b>4</b>     | <b>3</b>   |

In den Bürgschaften und Garantien sind wie im Vorjahr keine Eventualverbindlichkeiten für assoziierte Unternehmen enthalten. Die Eventualverbindlichkeiten für Joint Ventures betragen 235 (i. Vj. 248) Mio €.

Die Laufzeiten variieren je nach Art der Garantie von 3 Monaten bis zu 10 Jahren (z.B. bei Miet- und Pachtgarantien).

Grundlage für eine mögliche Inanspruchnahme durch den Begünstigten ist die nicht vertragskonforme Erfüllung von vertraglich eingegangenen Verpflichtungen durch den Hauptschuldner, wie z.B. nicht rechtzeitige oder nicht ordnungsgemäße Lieferung, Nichteinhaltung von zugesicherten Leistungsparametern oder nicht ordnungsgemäße Rückzahlung von Krediten.

Alle durch die ThyssenKrupp AG oder durch die Tochtergesellschaften ausgestellten oder in Auftrag gegebenen Bürgschaften oder Garantien erfolgen im Auftrag und unter Rückhaftung des jeweiligen aus dem zu Grunde liegenden Vertragsverhältnis entsprechend verpflichteten Unternehmens (Hauptschuldner). Besteht die Rückhaftung gegen einen Hauptschuldner, an dem ganz oder teilweise ein konzernfremder Dritter beteiligt ist, so wird mit diesem grundsätzlich die Stellung zusätzlicher Sicherheiten in entsprechender Höhe vereinbart.

ThyssenKrupp haftet aus Beteiligungen an Gesellschaften bürgerlichen Rechts, Personengesellschaften und Arbeitsgemeinschaften gesamtschuldnerisch.

Ehemalige Aktionäre von Thyssen und von Krupp haben die gerichtliche Überprüfung der Umtauschverhältnisse aus der Verschmelzung der Thyssen AG und der Fried. Krupp AG Hoesch-Krupp zur ThyssenKrupp AG nach § 305 UmwG beantragt. Die Verfahren sind vor dem Landgericht Düsseldorf anhängig. Stellt das Gericht im Spruchverfahren eine Unangemessenheit des Umtauschverhältnisses

fest, erfolgt ein Ausgleich durch eine verzinsliche bare Zuzahlung. Die Zuzahlung ist an alle betroffenen Aktionäre zu leisten, auch wenn sie nicht Antragsteller des Spruchverfahrens sind. Die Gesellschaft erwartet jedoch, dass die Spruchverfahren nicht zu baren Zuzahlungen führen werden, da die Umtauschverhältnisse sorgfältig ermittelt, zwischen voneinander unabhängigen Vertragspartnern vereinbart, von dem gerichtlich bestellten Verschmelzungsprüfer geprüft und bestätigt worden sind und auch der vom Landgericht Düsseldorf bestellte Sachverständige eine nur geringfügig abweichende Verschmelzungswertrelation festgestellt hat.

Aus der Eingliederung der Thyssen Industrie AG in die ThyssenKrupp AG ist ein Spruchverfahren zur gerichtlichen Überprüfung der Angemessenheit der Abfindung an die außenstehenden Aktionäre der Thyssen Industrie AG anhängig. Sollte das Gericht in einer rechtskräftigen Entscheidung zu dem Ergebnis kommen, dass die angebotene Abfindung unangemessen war, wird die durch weitere Barzahlung erhöhte Abfindung allen außenstehenden Aktionären gewährt.

ThyssenKrupp ist im Zusammenhang mit dem Erwerb und der Veräußerung von Unternehmen in gerichtliche, schiedsgerichtliche und außergerichtliche Auseinandersetzungen verwickelt, die zur Rückerstattung von Teilen des Kaufpreises oder zur Gewährung von Schadensersatz führen können. Aus verschiedenen Verträgen wie Bau-, Anlagenbau-, Liefer- und Leistungsverträgen werden von Vertragspartnern, Kunden, Konsortialpartnern und Subunternehmern Ansprüche erhoben. Bei einigen Rechtsstreitigkeiten haben sich die Ansprüche im Verlauf des Geschäftsjahres als unbegründet erwiesen oder sind verjährt. Eine Reihe von Verfahren sind noch anhängig.



### Sonstige finanzielle Verpflichtungen und andere Risiken

Im Rahmen von Miet-, Pacht- und Leasingverträgen, die als Operating Lease zu qualifizieren sind, least der Konzern Sachanlagen. Hieraus resultieren im Saldo Aufwendungen von 322 (i. Vj. 274) Mio €, die sich folgendermaßen zusammensetzen:

| Mio €                                            | 2008/2009  | 2009/2010  |
|--------------------------------------------------|------------|------------|
| Mindestmietzahlungen (minimum rentals)           | 276        | 320        |
| Variable Mietzahlungen (contingent rentals)      | 0          | 2          |
| abzgl. Erträge aus Untermietverträgen (sublease) | - 2        | 0          |
| <b>Insgesamt</b>                                 | <b>274</b> | <b>322</b> |

Die künftigen (nicht abgezinsten) Mindestmietzahlungen aus solchen unkündbaren Verträgen, die zum Stichtag eine anfängliche oder verbleibende Restlaufzeit von mehr als einem Jahr haben, betragen:

| Mio €                               | 30.09.2009   | 30.09.2010   |
|-------------------------------------|--------------|--------------|
| Bis zu einem Jahr                   | 236          | 228          |
| Zwischen einem Jahr und fünf Jahren | 552          | 523          |
| Länger als fünf Jahre               | 382          | 315          |
| <b>Insgesamt</b>                    | <b>1.170</b> | <b>1.066</b> |

Im Gesamtbetrag der künftigen Mindestmietzahlungen sind die künftigen Mindestmieteinnahmen aus unkündbaren Untermietverträgen in Höhe von 2 (i. Vj. 5) Mio € nicht berücksichtigt.

Das Bestellobligo für Investitionsvorhaben beläuft sich zum 30. September 2010 auf 1.276 (i. Vj. 3.028) Mio € und betrifft im Wesentlichen die Business Areas Steel Europe, Steel Americas und Stainless Global.

Gegenüber Kapitalgesellschaften und Genossenschaften bestehen Einzahlungsverpflichtungen und Nachschusspflichten von zusammen 3 (i. Vj. 3) Mio €. Darüber hinaus bestehen sonstige finanzielle Verpflichtungen in Höhe von 3.931 (i. Vj. 2.957) Mio €. Diese betreffen im Wesentlichen die Abnahmeverpflichtungen aus langfristigen Koks-, Kohle- und Kalklieferverträgen und Verpflichtungen aus Schiffscharterverträgen in den Business Areas Steel Europe und Steel Americas sowie die Abnahmeverpflichtungen aus Strom- und Gaslieferverträgen im Konzern. Daneben bestehen in den Business Areas Steel Europe und Steel Americas langfristige Lieferverträge für Eisenerz und Eisenerz-Pellets, aus denen Abnahmeverpflichtungen für einen Zeitraum von bis zu 14 Jahren resultieren. Auf Grund der hohen Volatilität der Preisentwicklung für Eisenerz wurden für die Bewertung der gesamten Abnahmeverpflichtungen die zum Berichtszeitpunkt gültigen Erzpreise zugrunde gelegt; hieraus ergeben sich Abnahmeverpflichtungen von 22.099 Mio €.

Im Rahmen der Sach- und Betriebsunterbrechungsversicherungen existieren zurzeit bei einigen Produktionsanlagen der Business Areas Steel Europe und Stainless Global signifikante Selbstbehalte. Der Eintritt eines oder mehrerer Schadensfälle kann zu einer spürbaren Beeinträchtigung der Vermögens-, Finanz- und Ertragslage des Konzerns führen.



## 22 Finanzinstrumente

In der nachfolgenden Tabelle sind die finanziellen Vermögenswerte und Verbindlichkeiten nach Bewertungskategorien und Klassen dargestellt. Dabei werden auch die Forderungen und Verbindlichkeiten

aus Finance Lease sowie die Derivate mit bilanzieller Sicherungsbeziehung berücksichtigt, obwohl sie keiner Bewertungskategorie des IAS 39 angehören.

Mio €

|                                                                                                              |                                      |                                           | Bewertung<br>nach IAS 39                    |                                             | Bewertung<br>nach IAS 17                |                                         |
|--------------------------------------------------------------------------------------------------------------|--------------------------------------|-------------------------------------------|---------------------------------------------|---------------------------------------------|-----------------------------------------|-----------------------------------------|
|                                                                                                              | Buchwert<br>lt. Bilanz<br>30.09.2009 | (Fortgeführte)<br>Anschaffungs-<br>kosten | Beizulegender<br>Zeitwert<br>erfolgswirksam | Beizulegender<br>Zeitwert<br>erfolgsneutral | Fortgeführte<br>Anschaffungs-<br>kosten | Beizulegender<br>Zeitwert<br>30.09.2009 |
| Forderungen aus Lieferungen und Leistungen (ohne Finance Lease)                                              | 5.112                                | 5.112                                     |                                             |                                             |                                         | 5.112                                   |
| Kredite und Forderungen                                                                                      |                                      | 5.112                                     |                                             |                                             |                                         | 5.112                                   |
| Forderungen aus Finance Lease                                                                                | 8                                    |                                           |                                             |                                             | 8                                       | 8                                       |
| Sonstige finanzielle Vermögenswerte                                                                          | 1.347                                | 805                                       | 245                                         | 297                                         |                                         | 1.347                                   |
| Kredite und Forderungen                                                                                      |                                      | 754                                       |                                             |                                             |                                         | 754                                     |
| Zur Veräußerung verfügbare finanzielle Vermögenswerte                                                        |                                      | 51                                        |                                             | 183                                         |                                         | 234                                     |
| Derivate ohne bilanzielle Sicherungsbeziehung<br>(Zu Handelszwecken gehaltene finanzielle Vermögenswerte)    |                                      |                                           | 245                                         |                                             |                                         | 245                                     |
| Derivate mit bilanzieller Sicherungsbeziehung<br>(Hedge Accounting)                                          |                                      |                                           | 0                                           | 114                                         |                                         | 114                                     |
| Zahlungsmittel und Zahlungsmitteläquivalente                                                                 | 5.349                                | 5.349                                     |                                             |                                             |                                         | 5.349                                   |
| Kredite und Forderungen                                                                                      |                                      | 5.349                                     |                                             |                                             |                                         | 5.349                                   |
| Summe finanzielle Vermögenswerte                                                                             | 11.816                               |                                           |                                             |                                             |                                         |                                         |
| davon nach Bewertungskategorien des IAS 39:                                                                  |                                      |                                           |                                             |                                             |                                         |                                         |
| Kredite und Forderungen                                                                                      | 11.215                               | 11.215                                    |                                             |                                             |                                         | 11.215                                  |
| Zur Veräußerung verfügbare finanzielle Vermögenswerte                                                        | 234                                  | 51                                        |                                             | 183                                         |                                         | 234                                     |
| Derivate ohne bilanzielle Sicherungsbeziehung<br>(Zu Handelszwecken gehaltene finanzielle Vermögenswerte)    | 245                                  |                                           | 245                                         |                                             |                                         | 245                                     |
| Finanzschulden (ohne Finance Lease)                                                                          | 7.361                                | 7.361                                     |                                             |                                             |                                         | 7.695                                   |
| Zu fortgeführten Anschaffungskosten bewertete finanzielle Verbindlichkeiten                                  |                                      | 7.361                                     |                                             |                                             |                                         | 7.695                                   |
| Verbindlichkeiten aus Finance Lease                                                                          | 104                                  |                                           |                                             |                                             | 104                                     | 104                                     |
| Verbindlichkeiten aus Lieferungen und Leistungen                                                             | 4.169                                | 4.169                                     |                                             |                                             |                                         | 4.169                                   |
| Zu fortgeführten Anschaffungskosten bewertete finanzielle Verbindlichkeiten                                  |                                      | 4.169                                     |                                             |                                             |                                         | 4.169                                   |
| Sonstige finanzielle Verbindlichkeiten                                                                       | 1.589                                | 1.393                                     | 138                                         | 58                                          |                                         | 1.589                                   |
| Zu fortgeführten Anschaffungskosten bewertete finanzielle Verbindlichkeiten                                  |                                      | 1.393                                     |                                             |                                             |                                         | 1.393                                   |
| Derivate ohne bilanzielle Sicherungsbeziehung<br>(Zu Handelszwecken gehaltene finanzielle Verbindlichkeiten) |                                      |                                           | 138                                         |                                             |                                         | 138                                     |
| Derivate mit bilanzieller Sicherungsbeziehung<br>(Hedge Accounting)                                          |                                      |                                           | 0                                           | 58                                          |                                         | 58                                      |
| Summe finanzielle Verbindlichkeiten                                                                          | 13.223                               |                                           |                                             |                                             |                                         |                                         |
| davon nach Bewertungskategorien des IAS 39:                                                                  |                                      |                                           |                                             |                                             |                                         |                                         |
| Zu fortgeführten Anschaffungskosten bewertete finanzielle Verbindlichkeiten                                  | 12.923                               | 12.923                                    |                                             |                                             |                                         | 13.257                                  |
| Derivate ohne bilanzielle Sicherungsbeziehung<br>(Zu Handelszwecken gehaltene finanzielle Verbindlichkeiten) | 138                                  |                                           | 138                                         |                                             |                                         | 138                                     |



Mio €

|                                                                                                              |                                      | Bewertung<br>nach IAS 39                  |                                             |                                             | Bewertung<br>nach IAS 17                |                                         |
|--------------------------------------------------------------------------------------------------------------|--------------------------------------|-------------------------------------------|---------------------------------------------|---------------------------------------------|-----------------------------------------|-----------------------------------------|
|                                                                                                              | Buchwert<br>lt. Bilanz<br>30.09.2010 | (Fortgeführte)<br>Anschaffungs-<br>kosten | Beizulegender<br>Zeitwert<br>erfolgswirksam | Beizulegender<br>Zeitwert<br>erfolgsneutral | Fortgeführte<br>Anschaffungs-<br>kosten | Beizulegender<br>Zeitwert<br>30.09.2010 |
| Forderungen aus Lieferungen und Leistungen (ohne Finance Lease)                                              | 5.877                                | 5.877                                     |                                             |                                             |                                         | 5.877                                   |
| Kredite und Forderungen                                                                                      |                                      | 5.877                                     |                                             |                                             |                                         | 5.877                                   |
| Forderungen aus Finance Lease                                                                                | 5                                    |                                           |                                             |                                             | 5                                       | 5                                       |
| Sonstige finanzielle Vermögenswerte                                                                          | 812                                  | 467                                       | 176                                         | 169                                         |                                         | 812                                     |
| Kredite und Forderungen                                                                                      |                                      | 406                                       |                                             |                                             |                                         | 406                                     |
| Zur Veräußerung verfügbare finanzielle Vermögenswerte                                                        |                                      | 61                                        |                                             | 19                                          |                                         | 80                                      |
| Derivate ohne bilanzielle Sicherungsbeziehung<br>(Zu Handelszwecken gehaltene finanzielle Vermögenswerte)    |                                      |                                           | 172                                         |                                             |                                         | 172                                     |
| Derivate mit bilanzieller Sicherungsbeziehung<br>(Hedge Accounting)                                          |                                      |                                           | 4                                           | 150                                         |                                         | 154                                     |
| Zahlungsmittel und Zahlungsmitteläquivalente                                                                 | 3.380                                | 3.380                                     |                                             |                                             |                                         | 3.380                                   |
| Kredite und Forderungen                                                                                      |                                      | 3.380                                     |                                             |                                             |                                         | 3.380                                   |
| Summe finanzielle Vermögenswerte                                                                             | 10.074                               |                                           |                                             |                                             |                                         |                                         |
| davon nach Bewertungskategorien des IAS 39:                                                                  |                                      |                                           |                                             |                                             |                                         |                                         |
| Kredite und Forderungen                                                                                      | 9.663                                | 9.663                                     |                                             |                                             |                                         | 9.663                                   |
| Zur Veräußerung verfügbare finanzielle Vermögenswerte                                                        | 80                                   | 61                                        |                                             | 19                                          |                                         | 80                                      |
| Derivate ohne bilanzielle Sicherungsbeziehung<br>(Zu Handelszwecken gehaltene finanzielle Vermögenswerte)    | 172                                  |                                           | 172                                         |                                             |                                         | 172                                     |
| Finanzschulden (ohne Finance Lease)                                                                          | 7.348                                | 7.348                                     |                                             |                                             |                                         | 7.862                                   |
| Zu fortgeführten Anschaffungskosten bewertete finanzielle Verbindlichkeiten                                  |                                      | 7.348                                     |                                             |                                             |                                         | 7.862                                   |
| Verbindlichkeiten aus Finance Lease                                                                          | 87                                   |                                           |                                             |                                             | 87                                      | 87                                      |
| Verbindlichkeiten aus Lieferungen und Leistungen                                                             | 5.411                                | 5.411                                     |                                             |                                             |                                         | 5.411                                   |
| Zu fortgeführten Anschaffungskosten bewertete finanzielle Verbindlichkeiten                                  |                                      | 5.411                                     |                                             |                                             |                                         | 5.411                                   |
| Sonstige finanzielle Verbindlichkeiten                                                                       | 1.641                                | 1.437                                     | 138                                         | 66                                          |                                         | 1.641                                   |
| Zu fortgeführten Anschaffungskosten bewertete finanzielle Verbindlichkeiten                                  |                                      | 1.437                                     |                                             |                                             |                                         | 1.437                                   |
| Derivate ohne bilanzielle Sicherungsbeziehung<br>(Zu Handelszwecken gehaltene finanzielle Verbindlichkeiten) |                                      |                                           | 137                                         |                                             |                                         | 137                                     |
| Derivate mit bilanzieller Sicherungsbeziehung<br>(Hedge Accounting)                                          |                                      |                                           | 1                                           | 66                                          |                                         | 67                                      |
| Summe finanzielle Verbindlichkeiten                                                                          | 14.487                               |                                           |                                             |                                             |                                         |                                         |
| davon nach Bewertungskategorien des IAS 39:                                                                  |                                      |                                           |                                             |                                             |                                         |                                         |
| Zu fortgeführten Anschaffungskosten bewertete finanzielle Verbindlichkeiten                                  | 14.196                               | 14.196                                    |                                             |                                             |                                         | 14.710                                  |
| Derivate ohne bilanzielle Sicherungsbeziehung<br>(Zu Handelszwecken gehaltene finanzielle Verbindlichkeiten) | 137                                  |                                           | 137                                         |                                             |                                         | 137                                     |

Für die Forderungen aus Lieferungen und Leistungen, sonstige kurzfristige Forderungen sowie Zahlungsmittel und Zahlungsmitteläquivalente entspricht der Buchwert dem beizulegenden Zeitwert. Der beizulegende Zeitwert von festverzinslichen Ausleihungen ergibt sich als Barwert der zukünftig erwarteten Cash-Flows. Die Abzinsung erfolgt auf Basis der am Bilanzstichtag gültigen Zinssätze.

Zur Veräußerung verfügbare finanzielle Vermögenswerte beinhalten im Wesentlichen Eigenkapitalinstrumente und Gläubigerpapiere. Sie werden grundsätzlich zum beizulegenden Zeitwert bewertet; dieser basiert soweit vorhanden auf Börsenkursen zum Bilanzstichtag. Liegen keine auf einem aktiven Markt notierten Preise vor und kann der beizulegende Zeitwert nicht verlässlich ermittelt werden, erfolgt eine Bewertung zu Anschaffungskosten.

Der beizulegende Zeitwert von Devisentermingeschäften errechnet sich auf Basis des am Bilanzstichtag geltenden Devisenkassamittelkurses unter Berücksichtigung der Terminaufschläge und -abschläge für die jeweilige Restlaufzeit des Kontraktes im Vergleich zum kontrahierten Devisenterminkurs. Bei Devisenoptionen werden anerkannte Modelle zur Ermittlung des Optionspreises angewandt. Der beizulegende Zeitwert einer Option wird neben der Restlaufzeit der Option zusätzlich durch weitere Bestimmungsfaktoren, wie z.B. die aktuelle Höhe und die Volatilität des zu Grunde liegenden jeweiligen Wechselkurses oder der zu Grunde liegenden Basiszinsen, beeinflusst.



Bei Zinsswaps und Zins-/Währungsswaps erfolgt die Bewertung zum beizulegenden Zeitwert durch die Abzinsung der zukünftig zu erwartenden Cash-Flows. Dabei werden die für die Restlaufzeit der Kontrakte geltenden Marktzinssätze zu Grunde gelegt. Daneben werden bei Zins-/Währungsswaps die Wechselkurse der jeweiligen Fremdwährungen, in denen die Cash-Flows stattfinden, einbezogen.

Der beizulegende Zeitwert von Warentermingeschäften basiert auf offiziellen Börsennotierungen. Die Bewertungen werden sowohl intern als auch von externen Finanzpartnern zum Bilanzstichtag vorgenommen.

Für die Verbindlichkeiten aus Lieferungen und Leistungen sowie die sonstigen kurzfristigen Verbindlichkeiten entspricht der Buchwert dem beizulegenden Zeitwert. Der beizulegende Zeitwert von festverzinslichen Verbindlichkeiten ergibt sich als Barwert der zukünftig erwarteten Cash-Flows. Die Abzinsung erfolgt auf Basis der am Bilanzstichtag gültigen Zinssätze. Bei Verbindlichkeiten mit variabel verzinslichem Charakter entsprechen die Buchwerte den beizulegenden Zeitwerten.

Finanzielle Vermögenswerte und Verbindlichkeiten, die zum beizulegenden Zeitwert bewertet werden, lassen sich in die folgende dreistufige Bewertungshierarchie einordnen:

Mio €

|                                                                                                           | Stichtag<br>30.09.2009 | Level 1    | Level 2    | Level 3  |
|-----------------------------------------------------------------------------------------------------------|------------------------|------------|------------|----------|
| <b>Finanzielle Vermögenswerte zum beizulegenden Zeitwert</b>                                              |                        |            |            |          |
| <b>Beizulegender Zeitwert erfolgswirksam</b>                                                              |                        |            |            |          |
| Derivate ohne bilanzielle Sicherungsbeziehung<br>(Zu Handelszwecken gehaltene finanzielle Vermögenswerte) | 245                    | 0          | 245        | 0        |
| Derivate mit bilanzieller Sicherungsbeziehung (Hedge Accounting)                                          | 0                      | 0          | 0          | 0        |
| <b>Beizulegender Zeitwert erfolgsneutral</b>                                                              |                        |            |            |          |
| Zur Veräußerung verfügbare finanzielle Vermögenswerte                                                     | 183                    | 181        | 2          | 0        |
| Derivate mit bilanzieller Sicherungsbeziehung (Hedge Accounting)                                          | 114                    | 0          | 114        | 0        |
| <b>Insgesamt</b>                                                                                          | <b>542</b>             | <b>181</b> | <b>361</b> | <b>0</b> |
| <b>Finanzielle Verbindlichkeiten zum beizulegenden Zeitwert</b>                                           |                        |            |            |          |
| <b>Beizulegender Zeitwert erfolgswirksam</b>                                                              |                        |            |            |          |
| Derivate ohne bilanzielle Sicherungsbeziehung<br>(Zu Handelszwecken gehaltene finanzielle Vermögenswerte) | 138                    | 0          | 138        | 0        |
| Derivate mit bilanzieller Sicherungsbeziehung (Hedge Accounting)                                          | 0                      | 0          | 0          | 0        |
| <b>Beizulegender Zeitwert erfolgsneutral</b>                                                              |                        |            |            |          |
| Derivate mit bilanzieller Sicherungsbeziehung (Hedge Accounting)                                          | 58                     | 0          | 58         | 0        |
| <b>Insgesamt</b>                                                                                          | <b>196</b>             | <b>0</b>   | <b>196</b> | <b>0</b> |

Mio €

|                                                                                                           | Stichtag<br>30.09.2010 | Level 1   | Level 2    | Level 3  |
|-----------------------------------------------------------------------------------------------------------|------------------------|-----------|------------|----------|
| <b>Finanzielle Vermögenswerte zum beizulegenden Zeitwert</b>                                              |                        |           |            |          |
| <b>Beizulegender Zeitwert erfolgswirksam</b>                                                              |                        |           |            |          |
| Derivate ohne bilanzielle Sicherungsbeziehung<br>(Zu Handelszwecken gehaltene finanzielle Vermögenswerte) | 172                    | 0         | 172        | 0        |
| Derivate mit bilanzieller Sicherungsbeziehung (Hedge Accounting)                                          | 4                      | 0         | 4          | 0        |
| <b>Beizulegender Zeitwert erfolgsneutral</b>                                                              |                        |           |            |          |
| Zur Veräußerung verfügbare finanzielle Vermögenswerte                                                     | 19                     | 16        | 3          | 0        |
| Derivate mit bilanzieller Sicherungsbeziehung (Hedge Accounting)                                          | 150                    | 0         | 150        | 0        |
| <b>Insgesamt</b>                                                                                          | <b>345</b>             | <b>16</b> | <b>329</b> | <b>0</b> |
| <b>Finanzielle Verbindlichkeiten zum beizulegenden Zeitwert</b>                                           |                        |           |            |          |
| <b>Beizulegender Zeitwert erfolgswirksam</b>                                                              |                        |           |            |          |
| Derivate ohne bilanzielle Sicherungsbeziehung<br>(Zu Handelszwecken gehaltene finanzielle Vermögenswerte) | 137                    | 0         | 137        | 0        |
| Derivate mit bilanzieller Sicherungsbeziehung (Hedge Accounting)                                          | 1                      | 0         | 1          | 0        |
| <b>Beizulegender Zeitwert erfolgsneutral</b>                                                              |                        |           |            |          |
| Derivate mit bilanzieller Sicherungsbeziehung (Hedge Accounting)                                          | 66                     | 0         | 66         | 0        |
| <b>Insgesamt</b>                                                                                          | <b>204</b>             | <b>0</b>  | <b>204</b> | <b>0</b> |



Die Bewertungshierarchie spiegelt die Bedeutung der bei der Ermittlung der beizulegenden Zeitwerte einbezogenen Faktoren wider. In Level 1 werden die Finanzinstrumente erfasst, deren beizulegender Zeitwert anhand von quotierten Marktpreisen auf aktiven Märkten ermittelt wird. Beizulegende Zeitwerte in Level 2 werden auf Grund von beobachtbaren Marktdaten, z.B. anhand von Währungskursen, ermittelt. In Level 3 werden die Finanzinstrumente erfasst, deren beizulegender Zeitwert anhand von nicht beobachtbaren Marktdaten bewertet wird.

Die folgende Tabelle stellt die Nettogewinne und -verluste aus Finanzinstrumenten nach Bewertungskategorien dar. Hierin sind keine Ergebniseffekte aus Finance Lease und aus Derivaten mit bilanzieller Sicherungsbeziehung berücksichtigt, da diese keiner Bewertungskategorie des IAS 39 angehören.

| Mio €                                                                                                  | 2008/2009 | 2009/2010 |
|--------------------------------------------------------------------------------------------------------|-----------|-----------|
| Kredite und Forderungen                                                                                | - 145     | 577       |
| Zur Veräußerung verfügbare finanzielle Vermögenswerte                                                  | 112       | 98        |
| Derivate ohne bilanzielle Sicherungsbeziehung (Zu Handelszwecken gehaltene finanzielle Vermögenswerte) | 151       | - 58      |
| Zu fortgeführten Anschaffungskosten bewertete finanzielle Verbindlichkeiten                            | - 120     | - 527     |

Das Nettoergebnis aus der Kategorie „Kredite und Forderungen“ resultiert im Wesentlichen aus Zinserträgen aus finanziellen Forderungen, Wertberichtigungen auf Forderungen aus Lieferungen und Leistungen sowie Kursgewinnen und Kursverlusten aus Fremdwährungsforderungen.

In der Kategorie „Zur Veräußerung verfügbare finanzielle Vermögenswerte“ sind im Wesentlichen die laufenden Erträge aus Eigenkapitalinstrumenten und Gläubigerpapieren enthalten.

Die Gewinne und Verluste aus Änderungen des beizulegenden Zeitwertes von Währungs-, Zins- und Warendervativen, die nicht die Anforderungen des IAS 39 für Hedge Accounting erfüllen, sind in der Kategorie „Derivate ohne bilanzielle Sicherungsbeziehung“ enthalten.

Die Kategorie „Zu fortgeführten Anschaffungskosten bewertete finanzielle Verbindlichkeiten“ umfasst die Zinsaufwendungen für finanzielle Verbindlichkeiten, Erträge aus der Aktivierung von Fremdkapitalkosten sowie Kursgewinne und Kursverluste aus Fremdwährungsverbindlichkeiten.

In den Nettogewinnen und -verlusten aus Finanzinstrumenten sind insgesamt Umrechnungsdifferenzen in Höhe von 155 (i. Vj. 12) Mio € enthalten.

### Derivative Finanzinstrumente

Der Konzern setzt verschiedene derivative Finanzinstrumente ein, darunter Devisentermingeschäfte, Devisenoptionsgeschäfte, Zinsswaps, Zins-/Währungsswaps und Warentermingeschäfte. Der Einsatz derivativer Finanzinstrumente erfolgt grundsätzlich zur Absicherung bestehender oder geplanter Grundgeschäfte und dient der Reduzierung von Fremdwährungs-, Zins- und Warenpreisrisiken.

Die nachfolgende Tabelle stellt die Nominalwerte und beizulegenden Zeitwerte der im Konzern eingesetzten derivativen Finanzinstrumente dar:

| Mio €                                                 | Nominalwert<br>30.09.2009 | Beizulegender<br>Zeitwert<br>30.09.2009 | Nominalwert<br>30.09.2010 | Beizulegender<br>Zeitwert<br>30.09.2010 |
|-------------------------------------------------------|---------------------------|-----------------------------------------|---------------------------|-----------------------------------------|
| <b>Aktiva</b>                                         |                           |                                         |                           |                                         |
| Währungsderivate ohne bilanzielle Sicherungsbeziehung | 4.024                     | 163                                     | 3.240                     | 115                                     |
| Währungsderivate im Cash-Flow-Hedge                   | 292                       | 32                                      | 1.286                     | 93                                      |
| Eingebettete Derivate                                 | 377                       | 19                                      | 128                       | 6                                       |
| Zinsderivate ohne bilanzielle Sicherungsbeziehung*    | 36                        | 8                                       | 20                        | 1                                       |
| Zinsderivate im Cash-Flow-Hedge*                      | 750                       | 29                                      | 0                         | 0                                       |
| Zinsderivate im Fair-Value-Hedge                      | 0                         | 0                                       | 987                       | 3                                       |
| Warenderivate ohne bilanzielle Sicherungsbeziehung    | 669                       | 55                                      | 393                       | 50                                      |
| Warenderivate im Cash-Flow-Hedge                      | 129                       | 53                                      | 123                       | 57                                      |
| Warenderivate im Fair-Value-Hedge                     | 41                        | 0                                       | 20                        | 1                                       |
| <b>Insgesamt</b>                                      | <b>6.318</b>              | <b>359</b>                              | <b>6.197</b>              | <b>326</b>                              |
| <b>Passiva</b>                                        |                           |                                         |                           |                                         |
| Währungsderivate ohne bilanzielle Sicherungsbeziehung | 2.349                     | 91                                      | 1.890                     | 73                                      |
| Währungsderivate im Cash-Flow-Hedge                   | 1.562                     | 56                                      | 1.038                     | 30                                      |
| Eingebettete Derivate                                 | 201                       | 8                                       | 94                        | 5                                       |
| Zinsderivate im Cash-Flow-Hedge*                      | 1                         | 0                                       | 752                       | 34                                      |
| Warenderivate ohne bilanzielle Sicherungsbeziehung    | 310                       | 39                                      | 408                       | 59                                      |
| Warenderivate im Cash-Flow-Hedge                      | 23                        | 2                                       | 10                        | 2                                       |
| Warenderivate im Fair-Value-Hedge                     | 41                        | 0                                       | 20                        | 1                                       |
| <b>Insgesamt</b>                                      | <b>4.487</b>              | <b>196</b>                              | <b>4.212</b>              | <b>204</b>                              |

\* inklusive Zins-/Währungsderivate



### Derivate mit bilanzieller Sicherungsbeziehung

Bilanzielle Sicherungsbeziehungen gem. IAS 39 (Hedge Accounting) bestehen vor allem zur Absicherung von Währungsrisiken aus festen vertraglichen Verpflichtungen in Fremdwährung sowie zukünftiger Fremdwährungsforderungen und -verbindlichkeiten, zur Absicherung von Warenpreissrisiken aus Absatz- und Beschaffungsgeschäften und zur Absicherung von Zinsrisiken aus langfristigen Finanzierungen.

### Cash-Flow-Hedges

Cash-Flow-Hedges bestehen vor allem zur Absicherung künftiger Zahlungsströme gegenüber Fremdwährungs- und Warenpreissrisiken aus zukünftigen Umsätzen und Beschaffungsgeschäften sowie Zinsrisiken aus langfristigen Finanzierungen. Diese Derivate werden zu beizulegenden Zeitwerten bilanziert, welche in einen effektiven und in einen ineffektiven Teil zerlegt werden. Der effektive Teil der Schwankungen der beizulegenden Zeitwerte dieser Derivate wird bis zum Realisationszeitpunkt des gesicherten Grundgeschäftes direkt im Eigenkapital im kumulierten sonstigen Ergebnis erfasst. Der ineffektive Teil hingegen wird ergebniswirksam in der Gewinn- und Verlustrechnung vereinnahmt. Bei Realisierung der zukünftigen Transaktionen (Grundgeschäfte) werden die im Eigenkapital kumulierten Effekte erfolgswirksam aufgelöst. Zum 30. September 2010 waren Sicherungsinstrumente in Höhe von 150 (i. Vj. 114) Mio € mit positiven beizulegenden Zeitwerten und in Höhe von 66 (i. Vj. 58) Mio € mit negativen beizulegenden Zeitwerten bilanziert. Für das Geschäftsjahr 2009/2010 ist im kumulierten sonstigen Ergebnis im Eigenkapital ein unrealisiertes Ergebnis in Höhe von 97 (i. Vj. 33) Mio € (vor Steuern) berücksichtigt. Die maximale Zeitdauer, für die Cash-Flows aus zukünftigen Transaktionen gesichert werden, beträgt 60 Monate.

Im Berichtsjahr wurden in Folge der unterjährigen Realisation von Grundgeschäften -6 (i. Vj. 9) Mio € aus dem kumulierten sonstigen Ergebnis im Eigenkapital ergebniswirksam in die Umsatzerlöse umgegliedert. Zusätzlich wurden 102 (i. Vj. 40) Mio € anschaffungskostenmindernd aus dem kumulierten sonstigen Ergebnis in die Vorräte umgegliedert, da die gesicherten Rohstoffe bilanziert wurden, aber noch keine ergebniswirksame Realisation des Grundgeschäftes stattgefunden hatte. Hieraus resultierte eine Minderung der Aufwendungen in Höhe von 49 Mio € in 2009/2010; im folgenden Geschäftsjahr werden Aufwendungen in Höhe von 53 Mio € erfasst. Darüber hinaus wurden 121 (i. Vj. 147) Mio € anschaffungskostenmindernd aus dem kumulierten sonstigen Ergebnis in die Anschaffungskosten der Sachanlagen umgegliedert. Hiervon wurden Aufwendungen in Höhe von 4 Mio € in 2009/2010 ergebniswirksam. Darüber hinaus werden 6 Mio € in 2010/2011, 6 Mio € in 2011/2012 und 105 Mio € in den folgenden Geschäftsjahren ergebniswirksam.

Zum 30. September 2010 resultiert aus ineffektiven Bestandteilen der als Cash-Flow-Hedges klassifizierten derivativen Finanzinstrumente ein Nettoergebnis in Höhe von 11 (i. Vj. 41) Mio €.

Der Abbruch von Cash-Flow-Hedges führte im laufenden Geschäftsjahr durch Umgliederung aus den kumulierten erfolgsneutralen Eigenkapitalveränderungen in die Gewinn- und Verlustrechnung zu einem Ergebnis von -4 (i. Vj. 84) Mio €. Diese ursprünglich ergebnisneutral behandelten Schwankungen der beizulegenden Zeitwerte von Derivaten wurden zu dem Zeitpunkt ergebniswirksam realisiert, als die Durchführung der abgesicherten zukünftigen Transaktionen in Form währungsgesicherter Umsatzerlöse und Rohstoffbezüge nicht länger als wahrscheinlich angesehen wurde. Ursächlich für den relativ hohen positiven Ergebnisbeitrag im Vorjahr war im Wesentlichen der durch die Wirtschaftskrise bedingte Rückgang von Rohstoffeinkäufen.

Die im folgenden Geschäftsjahr erwarteten Erträge aus den zum Stichtag in den kumulierten erfolgsneutralen Eigenkapitalveränderungen enthaltenen Schwankungen der beizulegenden Zeitwerte von Derivaten betragen 91 Mio €. Im Geschäftsjahr 2010/2011 werden Erträge in Höhe von 8 Mio €, im Geschäftsjahr 2011/2012 von 7 Mio € und in den nachfolgenden Geschäftsjahren Aufwendungen in Höhe von 9 Mio € erwartet.

### Fair-Value-Hedges

Fair-Value-Hedges bestehen vor allem zur Absicherung der beizulegenden Zeitwerte von festen vertraglichen Verpflichtungen und von Vorratsbeständen gegenüber Preisrisiken sowie zur Absicherung von Zinsrisiken. Diese Waren- und Zinsderivate werden zum beizulegenden Zeitwert bilanziert. Die Buchwerte der zugeordneten Grundgeschäfte werden um die Veränderungen der beizulegenden Zeitwerte der abgesicherten Risiken angepasst. Zum 30. September 2010 waren Sicherungsinstrumente in Höhe von 4 (i. Vj. 0) Mio € mit positiven beizulegenden Zeitwerten und in Höhe von 1 (i. Vj. 0) Mio € mit negativen beizulegenden Zeitwerten bilanziert. Die Schwankungen der beizulegenden Zeitwerte werden unmittelbar in Abhängigkeit von der Art der zu Grunde liegenden Geschäfte ergebniswirksam in den Umsatzerlösen oder Umsatzkosten bzw. im Finanzergebnis ausgewiesen. Im Geschäftsjahr ergab sich ein Nettoergebnis aus der Bewertung der Sicherungsinstrumente im Fair-Value-Hedge in Höhe von 0 (i. Vj. -1) Mio €, während im gleichen Zeitraum ein Nettoergebnis bei den zugehörigen Grundgeschäften von 0 (i. Vj. 1) Mio € realisiert wurde.



### Derivate ohne bilanzielle Sicherungsbeziehung

Werden die Voraussetzungen für die Anwendung der Spezialvorschriften zum Hedge Accounting gem. IAS 39 nicht erfüllt, erfolgt ein Ausweis der derivativen Finanzinstrumente als Derivate ohne bilanzielle Sicherungsbeziehung. Die hieraus resultierenden Auswirkungen auf die Gewinn- und Verlustrechnung sind in der Tabelle zu den Nettoergebnissen aus Finanzinstrumenten nach Bewertungskategorien dargestellt. In dieser Position enthalten sind auch die eingebetteten Derivate. Sie bestehen im ThyssenKrupp Konzern grundsätzlich in der Ausprägung, dass gewöhnliche Lieferungs- und Leistungsbeziehungen zu Lieferanten und Kunden im Ausland nicht in der funktionalen Währung (Landeswährung) eines der beiden Vertragspartner geschlossen wurden.

### Finanzwirtschaftliche Risiken

Der Vorstand der ThyssenKrupp AG hat ein Risikomanagementsystem implementiert, welches vom Aufsichtsrat überwacht wird. In den Grundsätzen für das Risikomanagement sind die Rahmenbedingungen zur Erfüllung der Anforderungen an ein ordnungsmäßiges und zukunftsgerichtetes Risikomanagement im ThyssenKrupp Konzern formuliert. Die Grundsätze verfolgen das Ziel, alle Mitarbeiter im Konzern zu einem verantwortungsvollen Umgang mit Risiken zu veranlassen sowie einen nachhaltigen Prozess zur Förderung des Risikobewusstseins zu begleiten. In der Konzernrichtlinie zum Risikomanagement und in weiteren Konzernrichtlinien sind die Prozesse des Risikomanagements, einzuhaltende Limitierungen sowie der Einsatz von Finanzinstrumenten konkret geregelt. Das Risikomanagementsystem ist darauf ausgerichtet, die Risiken zeitnah konzernweit zu identifizieren, zu analysieren, zu steuern, zu überwachen und zu kommunizieren. Insbesondere durch eine mindestens zweimal jährlich durchgeführte Risikoinventur in allen Konzernunternehmen wird die Risikolandschaft im ThyssenKrupp Konzern aktualisiert. Über die Ergebnisse des Risikoinventurprozesses werden sowohl der Vorstand der ThyssenKrupp AG als auch der Prüfungsausschuss des Aufsichtsrates informiert. Das Risikomanagement-Reporting ist ein kontinuierlicher Prozess, welcher in das regelmäßige Konzernreporting eingebettet ist. Sowohl die Konzernrichtlinien als auch die Informationssysteme werden regelmäßig überprüft und an aktuelle Entwicklungen angepasst. Zudem überprüft der Bereich Internal Auditing regelmäßig, ob die Konzernunternehmen die Vorgaben des Risikomanagementsystems einhalten.

ThyssenKrupp ist als weltweit agierender Konzern im Rahmen seiner gewöhnlichen Geschäftstätigkeit Kreditrisiken, Liquiditätsrisiken und Marktrisiken (Währungsrisiken, Zinsrisiken und Warenpreisrisiken) ausgesetzt. Ziel des finanziellen Risikomanagements ist es, die aus den operativen Geschäften sowie den daraus resultierenden Finanzierungserfordernissen entstehenden Risiken durch den Einsatz ausgewählter derivativer und nicht-derivativer Sicherungsinstrumente zu begrenzen.

### Kreditrisiko (Ausfallrisiko)

Der Konzern ist bei Finanzinstrumenten einem Ausfallrisiko ausgesetzt, das aus der möglichen Nichterfüllung einer Vertragspartei resultiert und daher maximal in Höhe des positiven beizulegenden Zeitwerts des betreffenden Finanzinstruments besteht. Im Zuge der Finanzkrise hat das Ausfallrisiko zusätzlich an Bedeutung gewonnen; wir steuern es deshalb mit besonderer Vorsicht. Zur Minimierung der Ausfallrisiken werden im ThyssenKrupp Konzern grundsätzlich Finanzinstrumente im Finanzierungsbereich nur mit solchen Kontrahenten abgeschlossen, die über eine sehr gute Bonität verfügen bzw. einem Einlagensicherungsfonds angeschlossen sind. Dabei werden zur weiteren Risikominimierung Geschäfte nur im Rahmen vorgegebener Kontrahentenlimite getätigt. Im operativen Bereich werden die Außenstände und Ausfallrisiken von den Konzerngesellschaften fortlaufend überwacht und teilweise über Warenkreditversicherungen abgesichert. Die Risiken aus Warenlieferungen an Großkunden unterliegen einer besonderen Bonitätsüberwachung. Zusätzlich werden für die Absicherung von Forderungen gegenüber Großkunden Akkreditive und Ausfallbürgschaften eingesetzt. Die Forderungen gegenüber diesen Vertragspartnern sind jedoch nicht so hoch, als dass sie außerordentliche Risikokonzentrationen begründen würden. Ausfallrisiken wird durch Wertberichtigungen Rechnung getragen.

### Liquiditätsrisiko

Das Liquiditätsrisiko für den Konzern besteht darin, dass auf Grund unzureichender Verfügbarkeit von Zahlungsmitteln, bestehenden oder zukünftigen Zahlungsverpflichtungen nicht nachgekommen werden kann. Das Management des Liquiditätsrisikos, somit die Ressourcenallokation und die Sicherung der finanziellen Unabhängigkeit des Konzerns, zählen zu den zentralen Aufgaben der ThyssenKrupp AG. Vor dem Hintergrund der Finanzkrise ist das Liquiditätsrisiko verstärkt in den Fokus gerückt. Um jederzeit die Zahlungsfähigkeit sowie die finanzielle Flexibilität des Konzerns sicherstellen zu können, werden auf Basis einer mehrjährigen Finanzplanung sowie einer monatlich rollierenden Liquiditätsplanung langfristige Kreditlinien und liquide Mittel vorgehalten. Trotz des teilweise immer noch schwierigen Marktumfeldes als Folge der Finanzkrise steht die Finanzierung auch im nächsten Jahr auf einer gesicherten Basis. So konnten insbesondere durch die Emission von Anleihen im Volumen von insgesamt 3 Mrd € in 2008/2009 das Fälligkeitsprofil verbessert und die Liquiditätssituation weiter gestärkt werden.

Das Cash-Pooling sowie externe Finanzierungen sind im Wesentlichen auf die ThyssenKrupp AG sowie spezielle Finanzierungsgesellschaften konzentriert. Die Mittel werden bedarfsgerecht intern den Konzerngesellschaften zur Verfügung gestellt.



Die folgende Tabelle zeigt die künftigen undiskontierten vertraglich vereinbarten Zahlungsmittelabflüsse aus finanziellen Verbindlichkeiten:

Mio €

|                                                                               | Buchwerte<br>30.09.2009 | Cash-Flows<br>2009/2010 | Cash-Flows<br>2010/2011 | Cash-Flows<br>2011/2012<br>bis<br>2013/2014 | Cash-Flows<br>nach<br>2013/2014 |
|-------------------------------------------------------------------------------|-------------------------|-------------------------|-------------------------|---------------------------------------------|---------------------------------|
| Anleihen                                                                      | 4.483                   | 303                     | 1.053                   | 2.728                                       | 1.953                           |
| Verbindlichkeiten gegenüber Kreditinstituten                                  | 2.245                   | 343                     | 220                     | 1.557                                       | 817                             |
| Verbindlichkeiten aus Finance Lease                                           | 104                     | 40                      | 25                      | 39                                          | 22                              |
| Übrige Finanzschulden                                                         | 633                     | 56                      | 138                     | 478                                         | 99                              |
| Verbindlichkeiten aus Lieferungen und Leistungen                              | 4.169                   | 4.128                   | 15                      | 24                                          | 2                               |
| Derivative finanzielle Verbindlichkeiten ohne bilanzielle Sicherungsbeziehung | 138                     | 129                     | 7                       | 1                                           | 1                               |
| Derivative finanzielle Verbindlichkeiten mit bilanzieller Sicherungsbeziehung | 58                      | 53                      | 5                       | 0                                           | 0                               |
| Übrige finanzielle Verbindlichkeiten                                          | 1.393                   | 1.390                   | 2                       | 1                                           | 0                               |

Mio €

|                                                                               | Buchwerte<br>30.09.2010 | Cash-Flows<br>2010/2011 | Cash-Flows<br>2011/2012 | Cash-Flows<br>2012/2013<br>bis<br>2014/2015 | Cash-Flows<br>nach<br>2014/2015 |
|-------------------------------------------------------------------------------|-------------------------|-------------------------|-------------------------|---------------------------------------------|---------------------------------|
| Anleihen                                                                      | 4.485                   | 1.053                   | 265                     | 3.331                                       | 1.085                           |
| Verbindlichkeiten gegenüber Kreditinstituten                                  | 2.222                   | 436                     | 321                     | 1.336                                       | 357                             |
| Verbindlichkeiten aus Finance Lease                                           | 87                      | 30                      | 24                      | 33                                          | 24                              |
| Übrige Finanzschulden                                                         | 641                     | 166                     | 29                      | 461                                         | 95                              |
| Verbindlichkeiten aus Lieferungen und Leistungen                              | 5.411                   | 5.366                   | 33                      | 8                                           | 4                               |
| Derivative finanzielle Verbindlichkeiten ohne bilanzielle Sicherungsbeziehung | 137                     | 123                     | 6                       | 8                                           | 0                               |
| Derivative finanzielle Verbindlichkeiten mit bilanzieller Sicherungsbeziehung | 67                      | 42                      | 9                       | 12                                          | 0                               |
| Übrige finanzielle Verbindlichkeiten                                          | 1.437                   | 1.389                   | 2                       | 0                                           | 0                               |

Den Zahlungsmittelflüssen aus derivativen Finanzinstrumenten stehen Zahlungsmittelflüsse aus den gesicherten Grundgeschäften gegenüber, welche in der Fälligkeitsanalyse nicht berücksichtigt wurden. Bei Berücksichtigung auch der Zahlungsmittelflüsse aus den gesicherten Grundgeschäften würden die in der Übersicht gezeigten Zahlungsmittelflüsse entsprechend geringer ausfallen.

#### Marktrisiken

Als Marktrisiko wird das Risiko bezeichnet, dass die beizulegenden Zeitwerte oder künftigen Zahlungsströme eines originären oder derivativen Finanzinstrumentes auf Grund von Änderungen der Risikofaktoren schwanken. Zu den für ThyssenKrupp relevanten Marktrisiken zählen das Währungsrisiko, das Zinsrisiko sowie das Warenpreisrisiko, insbesondere das Rohstoffpreisrisiko. Aus diesen Risiken können Ergebnis-, Eigenkapital- und Cash-Flow-Schwankungen resultieren. Ziel des Risikomanagements ist es, die entstehenden Risiken durch geeignete Maßnahmen, insbesondere den Einsatz von derivativen Finanzinstrumenten, zu eliminieren bzw. zu begrenzen. Der Einsatz von derivativen Finanzinstrumenten unterliegt strengen Kontrollen, die auf Basis von Richtlinien im Rahmen des regelmäßigen Reportings erfolgen. Es werden im Wesentlichen außerhalb der Börse (d.h. OTC) gehandelte Devisentermingeschäfte, Zinsswaps sowie Zins-

/Währungsderivate und Warentermingeschäfte mit Banken und Handelspartnern abgeschlossen. Zur Warenpreisabsicherung werden darüber hinaus auch börsengehandelte Futures eingesetzt.

Die nachstehend beschriebene Analyse sowie die mit Hilfe von Sensitivitätsanalysen ermittelten Beträge stellen hypothetische, zukunftsorientierte Angaben dar, die sich auf Grund unvorhersehbarer Entwicklungen an den Finanzmärkten von den tatsächlichen Ereignissen unterscheiden können. Zudem sind hier nicht die Risiken berücksichtigt, die nicht finanzieller Natur oder nicht quantifizierbar sind, wie z.B. Geschäftsrisiken.

#### Währungsrisiken

Die Internationalität unserer Geschäftstätigkeit bringt eine Vielzahl von Zahlungsströmen in unterschiedlichen Währungen – vor allem in US-Dollar – mit sich. Die Absicherung der hieraus resultierenden Wechselkursrisiken ist wesentlicher Bestandteil unseres Risikomanagements.

Konzerneinheitliche Richtlinien bilden die Vorgabe für das Devisenmanagement des ThyssenKrupp Konzerns. Grundsätzlich besteht für alle Konzerngesellschaften Sicherungspflicht von Fremdwährungspositionen im Zeitpunkt ihrer Entstehung. Die im Gebiet der Europäischen Währungsunion ansässigen verbundenen Unternehmen



sind grundsätzlich verpflichtet, alle offenen Positionen aus Waren- und Leistungsgeschäften in den wesentlichen Transaktionswährungen einer zentralen Clearing-Stelle anzudienen. Die angedienten Positionen werden laufzeitkongruent, in Abhängigkeit vom Sicherungszweck der Derivate und der damit verbundenen Art der bilanziellen Behandlung, entweder im Rahmen eines Portfolio-Hedge-Ansatzes abgesichert oder in direkter Zuordnung an Banken durchgeführt. Die Absicherung von Finanztransaktionen sowie von Geschäften unserer Tochterunternehmen außerhalb der Europäischen Währungsunion erfolgt in enger Abstimmung mit der Konzernleitung. Die Einhaltung der zentralen Vorgaben wird regelmäßig durch das Corporate Center Internal Auditing überprüft.

Zielsetzung bei der Währungsabsicherung ist das Festschreiben von Preisen auf Basis von Sicherungskursen zum Schutz vor zukünftigen ungünstigen Währungsschwankungen. Bei der Sicherung von geplanten produktionsabhängigen Erz-, Kohle- und Koksbezügen erfolgt darüber hinaus eine systematische Ausnutzung von günstigen Euro/US-Dollar-Entwicklungen.

Die Sicherungszeiträume richten sich grundsätzlich nach der Laufzeit des Grundgeschäftes. Die Laufzeit der abgeschlossenen Devisenderivate beträgt in der Regel bis zu 12 Monate und kann in einzelnen Ausnahmefällen auch deutlich darüber hinausgehen. Die Sicherungszeiträume geplanter Erz-, Kohle- und Koksbezüge sind auf Basis des theoretisch fairen Wechselkurses (Kaufkraftparität) und der Schwankungsbreite des US-Dollars gegenüber dem Euro unter Zugrundelegung historischer Daten festgelegt worden. Bei Erreichen definierter Sicherungskurse werden entsprechend einem festgelegten Raster die Sicherungen geplanter Bezüge für bestimmte Zeiträume ausgelöst.

Als relevante Risikovariablen für die Sensitivitätsanalyse im Sinne von IFRS 7 findet ausschließlich der US-Dollar Berücksichtigung, da der weitaus größte Teil der Zahlungsströme in Fremdwährung in US-Dollar abgewickelt wird. Da die Sicherungsgeschäfte grundsätzlich zur Absicherung von Grundgeschäften eingesetzt werden, gleichen sich die gegenläufigen Effekte der Grund- und Sicherungsgeschäfte über die Totalperiode nahezu aus. Das hier dargestellte Fremdwährungsrisiko resultiert somit aus Sicherungsbeziehungen mit bisher noch bilanzunwirksamen Grundgeschäften, d.h. Sicherungen von festen vertraglichen Verpflichtungen sowie von Planumsätzen. Analysiert man das US-Dollar-Währungsrisiko, ergibt sich zum 30. September 2010 folgendes Bild:

Wenn der Euro gegenüber dem US-Dollar am 30. September 2010 um 10 % stärker gewesen wäre, wären die Sicherungsrücklage im Eigenkapital und der beizulegende Zeitwert der relevanten Währungsderivate um 118 Mio € (i. Vj. 42 Mio €) niedriger und das Ergebnis aus der Stichtagsbewertung um 125 Mio € (i. Vj. 85 Mio €) höher gewesen. Wäre der Euro gegenüber dem US-Dollar am 30. September 2010 um 10 % schwächer gewesen, wären die Siche-

rungsrücklage im Eigenkapital und der beizulegende Zeitwert der relevanten Währungsderivate um 145 Mio € (i. Vj. 51 Mio €) höher und das Ergebnis aus der Stichtagsbewertung um 151 Mio € (i. Vj. 100 Mio €) geringer gewesen.

### Zinsrisiko

Auf Grund der internationalen Ausrichtung unserer Geschäftsaktivitäten findet die Liquiditätsbeschaffung zur Deckung unseres Kapitalbedarfs an den internationalen Geld- und Kapitalmärkten in verschiedenen Währungen – überwiegend im Euro- und US-Dollar-Raum – und mit unterschiedlichen Laufzeiten statt. Die hieraus resultierenden Finanzschulden sowie unsere Geldanlagen sind zu Teilen einem Zinsänderungsrisiko ausgesetzt. Aufgabe unseres zentralen Zinsmanagements ist es, dieses Zinsänderungsrisiko zu steuern und zu optimieren. Hierzu werden im Rahmen des Zinsmanagements regelmäßig Zinsanalysen erstellt. Zur Absicherung des Zinsrisikos werden fallweise derivative Finanzinstrumente eingesetzt. Diese Instrumente werden mit dem Ziel abgeschlossen, die Zinsvolatilitäten und Finanzierungskosten der zu Grunde liegenden Grundgeschäfte zu minimieren. So wurden im abgelaufenen Geschäftsjahr Zinsswaps zur teilweisen Reduzierung der Finanzierungskosten abgeschlossen.

Der Großteil der Zinsderivate ist in Form eines Cash-Flow-Hedges oder Fair-Value-Hedges direkt und unmittelbar bestimmten Finanzierungen zugeordnet. In diesen Fällen liegen Derivate mit bilanzieller Sicherungsbeziehung vor. Ein kleiner Teil der Zinsderivate ist nicht eindeutig einer Finanzierung zugeordnet, sondern sichert über einen Macro-Hedge-Ansatz ein Portfolio von Einzelkrediten.

Zins-/Währungsswaps wurden im Wesentlichen im Zusammenhang mit der Finanzierung der US-Dollar-Aktivitäten abgeschlossen.

Bei Zinsinstrumenten ergeben sich Cash-Flow-Risiken, Opportunitätseffekte sowie bilanz- und ergebniswirksame Zinsrisiken. Refinanzierungen sowie variable Finanzinstrumente unterliegen einem Cash-Flow-Risiko, welches die Unsicherheit bezüglich zukünftiger Zinszahlungen zum Ausdruck bringt. Die Messung des Cash-Flow-Risikos erfolgt mit einer Cash-Flow-Sensitivität. Opportunitätseffekte ergeben sich bei originären Finanzinstrumenten, da diese im Gegensatz zu Zinsderivaten nicht zum beizulegenden Zeitwert, sondern zu fortgeführten Anschaffungskosten bilanziert werden. Dieser Unterschiedsbetrag, der sogenannte Opportunitätseffekt, schlägt sich weder in der Bilanz noch in der Gewinn- und Verlustrechnung nieder. Bilanzwirksame Zinsrisiken, die sich im Eigenkapital auswirken, ergeben sich aus der Bewertung von als Cash-Flow-Hedge abgeschlossenen Zinsderivaten. Ergebniswirksame Zinsrisiken resultieren aus den nicht im Hedge Accounting bilanzierten Zinsderivaten. Opportunitätseffekte sowie bilanz- und ergebniswirksame Zinsrisiken werden mit einer Sensitivitätsberechnung der beizulegenden Zeitwerte und deren Veränderung ermittelt.



Die Zinsanalyse unterstellt zum 30. September 2010 eine Parallelverschiebung der Zinskurven für alle Währungen um +100 / -20 Basispunkte. Im Vorjahr wurde die Parallelverschiebung nach unten auf -20 Basispunkte begrenzt, um dem im Zusammenhang mit der Finanzkrise reduzierten Zinsniveau Rechnung zu tragen und negative Zinsen zu vermeiden. Auf Grund des aktuell immer noch niedrigen Zinsniveaus wird dieser Ansatz auch bei der aktuellen Analyse beibehalten. Es ergeben sich die in der folgenden Tabelle dargestellten Chancen (positive Werte) und Risiken (negative Werte):

| Mio €                                          | Veränderung aller Zinskurven<br>zum 30.09.2010 um |                     |
|------------------------------------------------|---------------------------------------------------|---------------------|
|                                                | + 100<br>Basispunkte                              | - 20<br>Basispunkte |
| Cash-Flow-Risiko                               | 27                                                | - 5                 |
| Opportunitätseffekte                           | 203                                               | - 42                |
| Bilanzwirksame Zinsrisiken aus Zinsderivaten   | 2                                                 | 0                   |
| Ergebniswirksame Zinsrisiken aus Zinsderivaten | 0                                                 | 0                   |

Im Vorjahr ergab die Analyse die in der folgenden Tabelle dargestellten Chancen (positive Werte) und Risiken (negative Werte):

| Mio €                                          | Veränderung aller Zinskurven<br>zum 30.09.2009 um |                     |
|------------------------------------------------|---------------------------------------------------|---------------------|
|                                                | + 100<br>Basispunkte                              | - 20<br>Basispunkte |
| Cash-Flow-Risiko                               | 46                                                | - 9                 |
| Opportunitätseffekte                           | 256                                               | - 53                |
| Bilanzwirksame Zinsrisiken aus Zinsderivaten   | - 1                                               | 0                   |
| Ergebniswirksame Zinsrisiken aus Zinsderivaten | 0                                                 | 0                   |

Wenn alle Zinskurven am 30. September 2010 um 100 Basispunkte höher gewesen wären, wären die Sicherungsrücklage im Eigenkapital und der beizulegende Zeitwert der relevanten Zinsderivate um 2 Mio € höher (i. Vj. 1 Mio € niedriger) und das Ergebnis aus der Stichtagsbewertung um 27 (i. Vj. 46) Mio € höher gewesen. Wären die Zinskurven am 30. September 2010 um 20 Basispunkte niedriger gewesen, wären die Sicherungsrücklage im Eigenkapital und der beizulegende Zeitwert der relevanten Zinsderivate wie im Vorjahr unverändert und das Ergebnis aus der Stichtagsbewertung um 5 (i. Vj. 9) Mio € niedriger gewesen.

#### Warenpreisrisiken

Der Konzern benötigt verschiedene NE-Metalle, insbesondere Nickel, sowie Rohstoffe wie z.B. Erze, Kohle, Koks und Energie für die verschiedenen Produktionsprozesse. Die Einkaufspreise für Rohstoffe und Energie können je nach Marktsituation erheblich schwanken.

Daher besteht ein Warenpreisrisiko, das Einfluss auf die Ergebnis-, Eigenkapital- sowie Cash-Flow-Situation haben kann. Auf die Preiserhöhungen an den Beschaffungsmärkten für Eisenerz und

Kokskohle im Zusammenhang mit der Umstellung unserer langfristigen Lieferverträge auf Quartalsverträge reagieren wir unter anderem mit entsprechenden Anpassungen der Verkaufsverträge. Zusätzlich setzt der Konzern auch derivative Finanzinstrumente, insbesondere für Nickel und Kupfer, ein, um die Risiken aus Rohstoffpreisvolatilitäten zu minimieren. Die Sicherung erfolgt grundsätzlich dezentral, wobei der Abschluss von Finanzderivaten in diesen Bereichen strengen Richtlinien unterliegt, deren Einhaltung durch Internal Auditing überprüft wird. Es werden ausschließlich marktgängige Instrumente verwendet. Dies sind im Wesentlichen Warentermingeschäfte. Die Warentermingeschäfte sind mit ihren beizulegenden Zeitwerten bilanziert. Die Schwankungen der beizulegenden Zeitwerte werden überwiegend ergebniswirksam im betrieblichen Ergebnis erfasst. Einige Warenderivate sind in Form eines Cash-Flow-Hedges direkt und unmittelbar einer bestimmten festen Verpflichtung zugeordnet. Zusätzlich werden in einigen Fällen die beizulegenden Zeitwerte von bestimmten festen Verpflichtungen und Vorratsbeständen in Form von Fair-Value-Hedges abgesichert.

Die aus den steigenden Energiepreisen resultierenden Risiken werden durch eine strukturierte Beschaffung auf dem Strommarkt sowie durch den Abschluss bzw. die Weiterführung langfristiger Erdgasverträge begrenzt. Diese Verträge fallen unter die sogenannte „own use exemption“ und werden daher nicht als derivative Finanzinstrumente bilanziert.

In die nach IFRS 7 für Finanzinstrumente geforderte Szenarioanalyse fließen nur hypothetische Veränderungen der Marktpreise für derivative Finanzinstrumente ein. Die gegenläufigen Effekte aus den Grundgeschäften sind nicht berücksichtigt und würden den Effekt deutlich verringern.

Auf Basis einer angenommenen Überversorgung in den jeweiligen Metallen haben wir Marktpreise auf einem Niveau in Nähe der Produktionskosten der wesentlichen Produzenten zu Grunde gelegt; dies entspricht in Abhängigkeit von den betrachteten Rohstoffen einem hypothetischen Preisrückgang von maximal 78 % (i. Vj. 71 %). Hintergrund ist, dass es bei wesentlich niedrigeren Marktpreisen über längere Zeiträume in der Regel zu Kürzungen der Metallproduktion bis hin zur Schließung kommen kann. Die pro Metall eingestellten Terminaufschläge (Contango) zeigen – wie bei Überversorgung üblich – hohe Werte. Der geschätzte hypothetische Effekt aus der Stichtagsbewertung auf die Gewinn- und Verlustrechnung beträgt 142 (i. Vj. 117) Mio € und auf das Eigenkapital -50 (i. Vj. -37) Mio €. Für das Szenario einer Hochpreisphase bei starker Verknappung werden Marktpreise zu historischen Höchstkursen verwendet. Die in der Regel mit einem unterversorgten Markt einhergehenden eingepflegten Terminabschläge (Backwardation) reflektieren ebenfalls historische Höchstwerte. Es werden in Abhängigkeit von den jeweiligen Rohstoffen maximale Preisanstiege von bis zu 142 % (i. Vj. 214 %) angenommen. Der geschätzte hypothetische Effekt aus der Stichtagsbewertung auf die Gewinn- und Verlustrechnung beträgt -200 (i. Vj. -336) Mio € und auf das Eigenkapital 113 (i. Vj. 149) Mio €.



## 23 Beziehungen zu nahe stehenden Unternehmen und Personen (related parties)

Die Alfred Krupp von Bohlen und Halbach-Stiftung ist gemäß Mitteilung nach § 21 WpHG vom 21. Dezember 2006 mit 25,10 % an der ThyssenKrupp AG beteiligt; gemäß freiwilliger Mitteilung der Stiftung vom 05. Oktober 2010 besteht per 30. September 2010 eine Beteiligung von rund 25,33 %. Über die in der Satzung (§ 21) festgelegten Leistungen und Gegenleistungen hinaus bestanden mit Ausnahme der nachfolgend aufgeführten Transaktionen keine wesentlichen Liefer- und Leistungsbeziehungen. Aus der in 2006/2007 erfolgten Beauftragung einer Konzerngesellschaft zur Modernisierung von Aufzügen im Wert von 2 Mio € durch eine zur Stiftung gehörende

Einrichtung realisierte eine Konzerngesellschaft in 2008/2009 einen Umsatz in Höhe von 0,2 Mio € und in 2009/2010 einen Umsatz in Höhe von 0,1 Mio €.

In den Geschäftsjahren 2008/2009 und 2009/2010 hatte der Konzern Geschäftsbeziehungen mit nicht konsolidierten Tochterunternehmen, assoziierten Unternehmen und Joint Ventures. Transaktionen mit diesen nahe stehenden Unternehmen resultieren aus dem normalen Lieferungs- und Leistungsaustausch; der Umfang der Geschäftsbeziehungen ist in der nachfolgenden Tabelle dargestellt:

Mio €

|                                        | Umsatz    |           | Bezogene Leistungen |           | Forderungen |            | Verbindlichkeiten |            |
|----------------------------------------|-----------|-----------|---------------------|-----------|-------------|------------|-------------------|------------|
|                                        | 2008/2009 | 2009/2010 | 2008/2009           | 2009/2010 | 30.09.2009  | 30.09.2010 | 30.09.2009        | 30.09.2010 |
| Nicht konsolidierte Tochterunternehmen | 1         | 1         | 0                   | 0         | 2           | 2          | 1                 | 1          |
| Assoziierte Unternehmen                | 88        | 54        | 8                   | 1         | 50          | 43         | 15                | 31         |
| Joint Ventures                         | 180       | 241       | 1.049               | 1.300     | 53          | 62         | 295               | 178        |

Die ESG Legierungen GmbH ist auf Grund der Tatsache, dass ein naher Familienangehöriger eines Vorstandsmitglieds der ThyssenKrupp AG als Geschäftsführer tätig ist, als nahe stehendes Unternehmen des Konzerns einzustufen. Der Konzern hat in 2009/2010 mit der ESG Legierungen GmbH einen Umsatz in Höhe von 0,7 (i. Vj. 0,3) Mio € aus dem Verkauf von Feinzink realisiert. Im gleichen Zeitraum wurden vom Konzern Zinklegierungen in Höhe von 0,1 (i. Vj. 0,1) Mio € bezogen. Die Transaktionen erfolgten zu marktüblichen Konditionen. Zum 30. September 2010 hatte der Konzern aus der Geschäftsbeziehung eine Forderung von 90 Tsd € (i. Vj. Verbindlichkeit von 48 Tsd €).

Die Heitkamp & Thumann Group mit Sitz in Düsseldorf sowie die Heitkamp Baugruppe mit Sitz in Herne sind auf Grund der Tatsache, dass ein Mitglied des Aufsichtsrats maßgeblichen Einfluss auf die Gruppen hat, als nahe stehende Unternehmen des Konzerns einzustufen. In 2009/2010 hat der Konzern mit der Heitkamp & Thumann Group einen Umsatz in Höhe von 18,6 (16.11.2008 bis 30.09.2009: 14,4) Mio € aus dem Verkauf von Stahl- und Edelstahlwerkstoffen sowie aus der Erbringung von Industriedienstleistungen und mit der Heitkamp Baugruppe einen Umsatz von 0,3 (i. Vj. 0) Mio € realisiert. Im gleichen Zeitraum wurden vom Konzern von der Heitkamp & Thumann Group Leistungen in Höhe von 7 Tsd € (16.11.2008 bis 30.09.2009: 0,5 Mio €) und von der Heitkamp Baugruppe Leistungen in Höhe von 0,2 (16.11.2008 bis 30.09.2009: 1,9) Mio € bezogen. Die Transaktionen erfolgten zu marktüblichen Konditionen. Zum 30. September 2010 hatte der Konzern aus der Geschäftsbeziehung

mit der Heitkamp & Thumann Group Forderungen von 1,7 (i. Vj. 1,2) Mio € und Verbindlichkeiten von 22 (i. Vj. 3) Tsd € sowie aus der Geschäftsbeziehung mit der Heitkamp Baugruppe Forderungen von 7 (i. Vj. 2) Tsd € und Verbindlichkeiten von 7 Tsd € (i. Vj. 0,7 Mio €).

### Vergütung des aktiven Vorstands und Aufsichtsrats

Die gemäß IAS 24 angabepflichtige Vergütung des Managements in den Schlüsselpositionen des Konzerns umfasst die Vergütung des aktiven Vorstands und Aufsichtsrats.

Die aktiven Mitglieder des Vorstands wurden wie folgt vergütet:

Tausend €

|                                                                | 2008/2009 | 2009/2010 |
|----------------------------------------------------------------|-----------|-----------|
| Kurzfristig fällige Leistungen (ohne aktienbasierte Vergütung) | 5.423     | 8.249     |
| Leistungen nach Beendigung des Arbeitsverhältnisses            | 879       | 2.726     |
| Aktienbasierte Vergütungen                                     | 1.120     | 4.060     |

Als Leistungen nach Beendigung des Arbeitsverhältnisses werden der aus den Pensionsrückstellungen für die aktiven Vorstandsmitglieder resultierende Dienstzeitaufwand (service cost) und der nachzuverrechnende Dienstzeitaufwand (past service cost) ausgewiesen. Die Angabe der aktienbasierten Vergütung bezieht sich auf den beizulegenden Zeitwert zum Zeitpunkt der Gewährung.



Darüber hinaus erhielt der Vorstand im Geschäftsjahr 2009/2010 keine Zahlungen aus aktienbasierter Vergütung (i. Vj. 4.745 Tsd €).

Zum 30. September 2010 sind Vorstandsmitgliedern wie im Vorjahr keine Kredite oder Vorschüsse gewährt worden; ebenso wurden wie im Vorjahr keine Haftungsverhältnisse zugunsten von Vorstandsmitgliedern eingegangen.

Die aktiven Mitglieder des Aufsichtsrats wurden wie folgt vergütet:

| Tausend €                         | 2008/2009 | 2009/2010 |
|-----------------------------------|-----------|-----------|
| Kurzfristig fällige Leistungen    | 1.677     | 1.774     |
| Langfristige Vergütungskomponente | 202       | 0         |

Darüber hinaus wurden den Mitgliedern des Aufsichtsrats der ThyssenKrupp AG für Aufsichtsratsmandate bei Konzerngesellschaften für das Geschäftsjahr 2009/2010 Vergütungen von 80 (i. Vj. 124) Tsd € gewährt.

Zum 30. September 2010 sind Aufsichtsratsmitgliedern wie im Vorjahr keine Kredite oder Vorschüsse gewährt worden; ebenso wurden wie im Vorjahr keine Haftungsverhältnisse zugunsten von Aufsichtsratsmitgliedern eingegangen.

Zur Individualisierung sowie zu weiteren Details zu den Bezügen der Vorstands- und Aufsichtsratsmitglieder vgl. die Ausführungen im geprüften Vergütungsbericht des Corporate-Governance-Kapitels auf den Seiten 67 bis 74 des Geschäftsberichts.

#### Vergütung ehemaliger Vorstands- und Aufsichtsratsmitglieder

Die Gesamtbezüge früherer Mitglieder des Vorstands und ihrer Hinterbliebenen beliefen sich auf 14,5 (i. Vj. 24,4) Mio €; darin enthalten waren im Vorjahr Leistungen nach IAS 24.16 (d) in Höhe von 9,9 Mio €. Für Pensionsverpflichtungen gegenüber früheren Mitgliedern des Vorstands und ihren Hinterbliebenen wurden nach IFRS 190,6 (i. Vj. 173,5) Mio € zurückgestellt.

Frühere Aufsichtsratsmitglieder, die vor dem 01. Oktober 2009 aus dem Aufsichtsrat ausgeschieden sind, erhalten in 2009/2010 für die Zeit ihrer Zugehörigkeit zum Aufsichtsrat keine anteilige Vergütung aus der langfristigen Vergütungskomponente (i. Vj. 4 Tsd €).

## 24 Segmentberichterstattung

ThyssenKrupp ist seit der Einführung der neuen Konzernorganisation zum 01. Oktober 2009 in die nachfolgend beschriebenen acht operativen Business Areas gegliedert, die die Konzernaktivitäten rund um Werkstoffe und Technologien bündeln. Die Business Areas entsprechen der internen Organisations- und Berichtsstruktur und stellen die Segmente gemäß IFRS 8 dar. Die Werte der Vorjahresperiode sind entsprechend angepasst.

### Steel Europe

In der Business Area sind die Aktivitäten für hochwertige Qualitätsflachstahlprodukte zusammengefasst, die von intelligenten Werkstofflösungen bis zum fertigen Bauteil reichen.

### Steel Americas

Diese Business Area umfasst die Produktion, Weiterverarbeitung und Vermarktung von hochwertigen Qualitätsstählen in Nord- und Südamerika. Sie beinhaltet auch die im Bau befindlichen Stahl- und Weiterverarbeitungswerke in Brasilien und den USA.

### Stainless Global

Die Business Area ist Anbieter von Edelstahl-Rostfrei-Flachprodukten sowie Hochleistungswerkstoffen wie Nickellegierungen und Titan. Bestandteil dieses Bereichs ist darüber hinaus das neue Edelstahlwerk in den USA.

### Materials Services

Die Business Area betreibt die Distribution, Logistik und den Service von Roh- und Werkstoffen sowie technischen Dienstleistungen. Neben Walz- und Edelstahl, Rohren, NE-Metallen und Kunststoffen werden Dienstleistungen angeboten, die von Anarbeitung und Logistik über Lager- und Bestandsmanagement bis hin zum Supply-Chain-Management reichen. Technische und infrastrukturelle Services werden in den Bereichen Gleis- und Bautechnik sowie Anlagen- und Stahlwerksdienstleistungen angeboten.

### Elevator Technology

Die Business Area betreibt den Neubau, die Modernisierung sowie den Service von Aufzügen, Fahrtreppen, Fahrsteigen, Treppen- und Plattformliften sowie Fluggastbrücken. Das Leistungsspektrum umfasst die gesamte Produktpalette von Anlagen für den Volumenmarkt bis zu kundenindividuellen Lösungen nach Maß.



### Plant Technology

Die Business Area ist Anbieter im Spezial- und Großanlagenbau. Das Produktportfolio reicht von Chemie- und Raffinerieanlagen über Anlagen für die Zementindustrie und innovative Lösungen zum Abbau und zur Gewinnung von Rohstoffen sowie Mineralien bis hin zu Produktionssystemen und Montageanlagen für die Automobilindustrie.

### Components Technology

Die Business Area bietet leistungsfähige und innovative Komponenten für die Automobilindustrie, Baumaschinen, Maschinenbau und Windkraftanlagen an.

### Marine Systems

Die Business Area ist Anbieter von Über- und Unterwasser-Marineschiffen sowie Yachten im Premium-Segment. Nach der Restrukturierung sowie den vollzogenen Veräußerungen wird sich die Business Area zukünftig auf den Marineschiffbau konzentrieren.

### Corporate

Corporate umfasst die Konzernverwaltung einschließlich der Führung der Business Areas. Ferner sind hier die Business-Services-Aktivitäten in den Bereichen Finanzen, Kommunikation, IT und Personal erfasst. Hinzu kommen die nicht betriebsnotwendigen Immobilien, die zentral geführt und verwertet werden, sowie die inaktiven Gesellschaften, die den einzelnen Business Areas nicht zugeordnet werden können.

Das Ergebnis vor Steuern von Corporate setzt sich folgendermaßen zusammen:

Mio €

|                                              | 2008/2009    | 2009/2010    |
|----------------------------------------------|--------------|--------------|
| Verwaltungskosten Konzernleitung             | - 155        | - 221        |
| Altersversorgung                             | - 30         | - 25         |
| FuE-Förderung                                | - 12         | - 17         |
| Zinsergebnis Nettofinanzschulden             | - 132        | - 149        |
| Zinsaufwand aus Pensionsverpflichtungen      | - 221        | - 178        |
| Übriges Finanzergebnis                       | 47           | 7            |
| Risk and Insurance Services                  | 18           | 11           |
| Sondervorgänge                               | - 6          | - 3          |
| Übrige Corporate Headquarters-Gesellschaften | - 44         | - 11         |
| <b>Ergebnis Corporate Headquarters</b>       | <b>- 535</b> | <b>- 586</b> |
| <b>Ergebnis Business Services</b>            | <b>0</b>     | <b>- 6</b>   |
| <b>Ergebnis IT-Services</b>                  | <b>0</b>     | <b>- 2</b>   |
| <b>Ergebnis Real Estate</b>                  | <b>1</b>     | <b>- 15</b>  |
| <b>Ergebnis Corporate vor Steuern</b>        | <b>- 534</b> | <b>- 609</b> |

### Konsolidierung

Die Konsolidierung umfasst im Wesentlichen die Eliminierung von Zwischengewinnen im Vorratsvermögen.

Die Rechnungslegungsgrundsätze für die Segmente sind die gleichen, wie sie für den Konzern in den Grundsätzen der Rechnungslegung beschrieben sind. Das Maß für die Ertragskraft der einzelnen Segmente des Konzerns ist das „Ergebnis vor Steuern“, wie es in der Gewinn- und Verlustrechnung dargestellt wird.

Die Umsätze zwischen den Segmenten werden zu marktüblichen Verrechnungspreisen vorgenommen.



Mio €

|                                                                                                                                           | Steel<br>Europe | Steel<br>Americas | Stainless<br>Global | Materials<br>Services | Elevator<br>Technology | Plant<br>Technology | Components<br>Technology | Marine<br>Systems | Corporate | Konsoli-<br>dierung | Konzern        |
|-------------------------------------------------------------------------------------------------------------------------------------------|-----------------|-------------------|---------------------|-----------------------|------------------------|---------------------|--------------------------|-------------------|-----------|---------------------|----------------|
| <b>Geschäftsjahr 2008/2009</b>                                                                                                            |                 |                   |                     |                       |                        |                     |                          |                   |           |                     |                |
| Außenumsätze                                                                                                                              | 8.156           | 0                 | 4.087               | 12.343                | 5.304                  | 4.391               | 4.590                    | 1.593             | 99        | 0                   | <b>40.563</b>  |
| konzerninterne Umsätze                                                                                                                    | 1.414           | 0                 | 399                 | 472                   | 4                      | 59                  | 13                       | 1                 | 28        | - 2.390             | <b>0</b>       |
| Umsatzerlöse gesamt                                                                                                                       | 9.570           | 0                 | 4.486               | 12.815                | 5.308                  | 4.450               | 4.603                    | 1.594             | 127       | - 2.390             | <b>40.563</b>  |
| Ergebnis aus nach der<br>Equity-Methode bilanzier-<br>ten Beteiligungen                                                                   | - 24            | 0                 | 0                   | - 12                  | 1                      | 2                   | - 4                      | 9                 | 0         | - 1                 | <b>- 29</b>    |
| Summe der Anteile, die<br>nach der Equity-Methode<br>bilanziert sind                                                                      | 244             | 0                 | 14                  | 66                    | 1                      | 5                   | 12                       | 133               | 6         | 0                   | <b>481</b>     |
| Zinserträge                                                                                                                               | 51              | 80                | 25                  | 69                    | 34                     | 108                 | 32                       | 33                | 567       | - 736               | <b>263</b>     |
| Zinsaufwendungen                                                                                                                          | - 114           | - 219             | - 87                | - 153                 | - 34                   | - 35                | - 94                     | - 45              | - 919     | 736                 | <b>- 964</b>   |
| Ergebnis vor Steuern                                                                                                                      | - 197           | - 216             | - 926               | - 295                 | 570                    | 236                 | - 458                    | - 554             | - 534     | 10                  | <b>- 2.364</b> |
| Segmentvermögen                                                                                                                           | 12.277          | 7.461             | 5.163               | 7.282                 | 5.003                  | 4.973               | 5.089                    | 4.305             | 20.632    | - 30.818            | <b>41.367</b>  |
| Abschreibungen                                                                                                                            | 597             | 4                 | 157                 | 167                   | 66                     | 36                  | 280                      | 45                | 28        | 0                   | <b>1.380</b>   |
| Wertminderungs-<br>aufwendungen auf<br>immaterielle Vermögens-<br>werte, Sachanlagen und<br>als Finanzinvestition<br>gehaltene Immobilien | 22              | 0                 | 107                 | 4                     | 3                      | 7                   | 152                      | 148               | 3         | 0                   | <b>446</b>     |
| Wertminderungs-<br>aufwendungen auf nach<br>der Equity-Methode<br>bilanzierte Beteili-<br>gungen und finanzielle<br>Vermögenswerte        | 0               | 0                 | 0                   | 1                     | 0                      | 1                   | 0                        | 29                | 0         | 0                   | <b>31</b>      |
| Wertaufholungen auf<br>immaterielle Vermögens-<br>werte, Sachanlagen und<br>als Finanzinvestition<br>gehaltene Immobilien                 | 0               | 0                 | 0                   | 0                     | 0                      | 0                   | 1                        | 0                 | 1         | 0                   | <b>2</b>       |
| Segmentverbindlichkeiten                                                                                                                  | 8.704           | 5.589             | 3.505               | 4.821                 | 2.985                  | 3.868               | 3.322                    | 3.852             | 25.812    | - 30.787            | <b>31.671</b>  |
| Zahlungsunwirksames<br>Ergebnis aus der<br>Veränderung sonstiger<br>Rückstellungen                                                        | - 264           | 6                 | - 77                | - 242                 | - 124                  | - 111               | - 263                    | - 171             | - 7       | - 6                 | <b>- 1.259</b> |
| Investitionen in imma-<br>terielle Vermögenswerte,<br>Sachanlagen und<br>als Finanzinvestition<br>gehaltene Immobilien                    | 418             | 2.135             | 343                 | 227                   | 116                    | 51                  | 538                      | 28                | 126       | 30                  | <b>4.012</b>   |



Download der Tabellen unter:

[http://www.thyssenkrupp.com/financial-reports/09\\_10/de/](http://www.thyssenkrupp.com/financial-reports/09_10/de/)



Mio €

|                                                                                                                                           | Steel<br>Europe | Steel<br>Americas | Stainless<br>Global | Materials<br>Services | Elevator<br>Technology | Plant<br>Technology | Components<br>Technology | Marine<br>Systems | Corporate | Konsoli-<br>dierung | Konzern |
|-------------------------------------------------------------------------------------------------------------------------------------------|-----------------|-------------------|---------------------|-----------------------|------------------------|---------------------|--------------------------|-------------------|-----------|---------------------|---------|
| <b>Geschäftsjahr 2009/2010</b>                                                                                                            |                 |                   |                     |                       |                        |                     |                          |                   |           |                     |         |
| Außenumsätze                                                                                                                              | 9.032           | 68                | 5.306               | 12.142                | 5.178                  | 3.889               | 5.710                    | 1.208             | 88        | 0                   | 42.621  |
| konzerninterne Umsätze                                                                                                                    | 1.738           | 0                 | 595                 | 621                   | 10                     | 42                  | 14                       | 3                 | 43        | - 3.066             | 0       |
| Umsatzerlöse gesamt                                                                                                                       | 10.770          | 68                | 5.901               | 12.763                | 5.188                  | 3.931               | 5.724                    | 1.211             | 131       | - 3.066             | 42.621  |
| Ergebnis aus nach der<br>Equity-Methode bilanzier-<br>ten Beteiligungen                                                                   | 30              | 0                 | 0                   | 3                     | 1                      | 2                   | 0                        | 20                | 0         | 0                   | 56      |
| Summe der Anteile, die<br>nach der Equity-Methode<br>bilanziert sind                                                                      | 267             | 0                 | 15                  | 68                    | 1                      | 5                   | 13                       | 146               | 8         | - 1                 | 522     |
| Zinserträge                                                                                                                               | 39              | 86                | 14                  | 57                    | 53                     | 91                  | 54                       | 34                | 586       | - 670               | 344     |
| Zinsaufwendungen                                                                                                                          | - 109           | - 261             | - 84                | - 107                 | - 29                   | - 32                | - 86                     | - 45              | - 913     | 670                 | - 996   |
| Ergebnis vor Steuern                                                                                                                      | 639             | - 320             | - 121               | 411                   | 602                    | 308                 | 220                      | 38                | - 609     | - 33                | 1.135   |
| Segmentvermögen                                                                                                                           | 9.433           | 9.020             | 5.393               | 7.660                 | 5.435                  | 5.372               | 5.596                    | 4.132             | 16.852    | - 25.181            | 43.712  |
| Abschreibungen                                                                                                                            | 579             | 37                | 160                 | 142                   | 72                     | 35                  | 277                      | 24                | 35        | 0                   | 1.361   |
| Wertminderungs-<br>aufwendungen auf<br>immaterielle Vermögens-<br>werte, Sachanlagen und<br>als Finanzinvestition<br>gehaltene Immobilien | 4               | 6                 | 0                   | 3                     | 6                      | 2                   | 37                       | 7                 | 10        | 0                   | 75      |
| Wertminderungsauf-<br>wendungen auf nach<br>der Equity-Methode<br>bilanzierte Beteili-<br>gungen und finanzielle<br>Vermögenswerte        | 0               | 0                 | 0                   | 2                     | 0                      | 0                   | 0                        | 5                 | 0         | 0                   | 7       |
| Wertaufholungen auf<br>immaterielle Vermögens-<br>werte, Sachanlagen und<br>als Finanzinvestition<br>gehaltene Immobilien                 | 5               | 0                 | 0                   | 0                     | 0                      | 0                   | 1                        | 3                 | 0         | 0                   | 9       |
| Segmentverbindlichkeiten                                                                                                                  | 5.761           | 7.124             | 3.759               | 5.113                 | 3.268                  | 4.306               | 3.398                    | 3.308             | 23.054    | - 25.767            | 33.324  |
| Zahlungsunwirksames<br>Ergebnis aus der<br>Veränderung sonstiger<br>Rückstellungen                                                        | - 65            | - 1               | - 39                | - 15                  | - 93                   | - 106               | - 179                    | - 24              | - 26      | - 20                | - 568   |
| Investitionen in imma-<br>terielle Vermögenswerte,<br>Sachanlagen und<br>als Finanzinvestition<br>gehaltene Immobilien                    | 286             | 2.054             | 344                 | 125                   | 70                     | 32                  | 272                      | 8                 | 206       | 11                  | 3.408   |

Die Summe der Anteile, die nach der Equity-Methode bilanziert werden, leitet sich wie folgt auf den Konzen-Bilanzwert über:

Mio €

|                                                                                                                 | 30.09.2009 | 30.09.2010 |
|-----------------------------------------------------------------------------------------------------------------|------------|------------|
| Summe der Anteile, die nach der Equity-Methode bilanziert werden gemäß Segmentberichterstattung                 | 481        | 522        |
| abzüglich Summe der Anteile, die nach der Equity-Methode bilanziert werden, die zur Veräußerung vorgesehen sind | - 1        | 0          |
| <b>Summe der Anteile, die nach der Equity-Methode bilanziert werden gemäß Bilanz</b>                            | <b>480</b> | <b>522</b> |

Bei der Darstellung der Informationen nach Regionen erfolgt die Länderzuordnung der Umsätze nach dem Sitz des Kunden, während die Zuordnung des Segmentvermögens und der Investitionen nach dem jeweiligen Standort vorgenommen wird. Die Bestimmung der Investitionen erfolgt nach der für die Kapitalflussrechnung geltenden Abgrenzung.

Das geografische Segment „Übrige EU“ umfasst mit Ausnahme von Deutschland alle Mitgliedsstaaten der Europäischen Union zum aktuellen Berichtszeitpunkt. Die europäischen Länder, die derzeit nicht Mitglied der Europäischen Union sind, sind Teil des Segments „Übrige Länder“. Das Segment „Amerika“ beinhaltet die Staaten der Nafta und von Südamerika. Das Segment „Asien/Pazifik“ umfasst Asien und Australien.

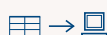

Download der Tabellen unter:  
[http://www.thyssenkrupp.com/financial-reports/09\\_10/de/](http://www.thyssenkrupp.com/financial-reports/09_10/de/)



Es gab keine Beziehungen zu einzelnen Kunden, deren Umsatzanteil gemessen am Konzernumsatz wesentlich ist.

Mio €

|                                                                                                                                                                                                              | Deutschland | Übrige EU | Amerika | Asien/Pazifik | Übrige Länder | Konzern |
|--------------------------------------------------------------------------------------------------------------------------------------------------------------------------------------------------------------|-------------|-----------|---------|---------------|---------------|---------|
| Außenumsätze (Sitz des Kunden)                                                                                                                                                                               |             |           |         |               |               |         |
| 2008/2009                                                                                                                                                                                                    | 13.031      | 12.142    | 7.858   | 4.341         | 3.191         | 40.563  |
| 2009/2010                                                                                                                                                                                                    | 13.933      | 12.485    | 8.266   | 5.013         | 2.924         | 42.621  |
| Langfristige Vermögenswerte<br>(= immaterielle Vermögenswerte, Sachanlagen, als Finanzinvestition<br>gehaltene Immobilien sowie sonstige nicht finanzielle Vermögenswerte),<br>(Standort der Vermögenswerte) |             |           |         |               |               |         |
| 30.09.2009                                                                                                                                                                                                   | 7.943       | 2.377     | 7.972   | 822           | 393           | 19.507  |
| 30.09.2010                                                                                                                                                                                                   | 7.658       | 2.279     | 10.381  | 923           | 452           | 21.693  |

## 25 Schätzungen und Ermessensausübungen im Rahmen der Rechnungslegung

Die Erstellung des Konzernabschlusses erfordert die Vornahme von Schätzungen sowie das Treffen von Annahmen durch das Management, wodurch die Höhe der berichteten Beträge und die diesbezüglichen Anhangangaben beeinflusst werden. Alle Schätzungen und Annahmen werden nach bestem Wissen und Gewissen getroffen, um ein den tatsächlichen Verhältnissen entsprechendes Bild der Vermögens-, Finanz- und Ertragslage des Konzerns zu vermitteln.

### Bilanzierung von Erwerben

Als Folge von Akquisitionen werden Firmenwerte in der Bilanz des Konzerns ausgewiesen. Bei der Erstkonsolidierung eines Erwerbs werden alle identifizierbaren Vermögenswerte, Verbindlichkeiten und Eventualverbindlichkeiten zu beizulegenden Zeitwerten zum Erwerbsstichtag angesetzt. Eine der wesentlichsten Schätzungen bezieht sich dabei auf die Bestimmung der zum Erwerbsstichtag jeweils beizulegenden Zeitwerte dieser Vermögenswerte und Verbindlichkeiten. Grundstücke, Gebäude und Geschäftsausstattung werden in der Regel auf Basis unabhängiger Gutachten bewertet, während marktgängige Wertpapiere zum Börsenpreis angesetzt werden. Falls immaterielle Vermögenswerte identifiziert werden, wird in Abhängigkeit von der Art des immateriellen Vermögenswerts und der Komplexität der Bestimmung des beizulegenden Zeitwerts entweder auf das unabhängige Gutachten eines externen Bewertungsgutachters zurückgegriffen oder der beizulegende Zeitwert intern unter Verwendung einer angemessenen Bewertungstechnik ermittelt, deren Basis üblicherweise die Prognose der insgesamt erwarteten künftigen Cash-Flows ist. Diese Bewertungen sind eng verbunden mit den Annahmen, die das Management bezüglich der künftigen Wertentwicklung der jeweiligen Vermögenswerte getroffen hat sowie der unterstellten Veränderungen des anzuwendenden Diskontierungszinssatzes.

### Firmenwert

Wie in den Grundsätzen der Rechnungslegung unter Anhang-Nr. 01 dargestellt, überprüft der Konzern jährlich und sofern irgendein Anhaltspunkt dafür vorliegt, ob eine Wertminderung der Firmenwerte eingetreten ist. Dann ist der erzielbare Betrag der Cash Generating Unit zu schätzen. Dieser entspricht dem höheren Wert von beizulegendem Zeitwert abzüglich Veräußerungskosten und dem Nutzungswert. Die Bestimmung des Nutzungswertes beinhaltet die Vornahme von Anpassungen und Schätzungen bezüglich der Prognose und Diskontierung der künftigen Cash-Flows (vgl. Anhang-Nr. 04). Obwohl das Management davon ausgeht, dass die zur Berechnung des erzielbaren Betrags verwendeten Annahmen angemessen sind, könnten etwaige unvorhersehbare Veränderungen dieser Annahmen zu einem Wertminderungsaufwand führen, der die Vermögens-, Finanz- und Ertragslage nachteilig beeinflussen könnte.

### Werthaltigkeit der Vermögenswerte

Zu jedem Bilanzstichtag hat der Konzern einzuschätzen, ob irgendein Anhaltspunkt dafür vorliegt, dass der Buchwert einer Sachanlage, einer als Finanzinvestition gehaltenen Immobilie oder eines immateriellen Vermögenswertes wertgemindert sein könnte. In diesem Fall wird der erzielbare Betrag des betreffenden Vermögenswertes geschätzt. Der erzielbare Betrag entspricht dem höheren Wert von beizulegendem Zeitwert abzüglich Veräußerungskosten und dem Nutzungswert. Zur Ermittlung des Nutzungswertes sind die diskontierten künftigen Cash-Flows des betreffenden Vermögenswertes zu bestimmen. Die Schätzung der diskontierten künftigen Cash-Flows beinhaltet wesentliche Annahmen wie insbesondere solche bezüglich der künftigen Verkaufspreise und Verkaufsvolumina, der Kosten und der Diskontierungszinssätze. Obwohl das Management davon ausgeht, dass die Schätzungen der relevanten erwarteten Nutzungsdauern, die Annahmen bezüglich der wirtschaftlichen Rahmenbedingungen und der Entwicklung der Industriezweige, in denen der Konzern





tätig ist, sowie die Einschätzungen der diskontierten künftigen Cash-Flows angemessen sind, könnte durch eine Veränderung der Annahmen oder Umstände eine Veränderung der Analyse erforderlich werden. Hieraus könnten in der Zukunft zusätzliche Wertminderungen oder Wertaufholungen resultieren, falls sich die vom Management identifizierten Trends umkehren oder sich die Annahmen und Schätzungen als falsch erweisen sollten.

#### Umsatzrealisierung aus Fertigungsaufträgen

Bestimmte Konzerngesellschaften, insbesondere in den Business Areas Elevator Technology, Plant Technology und Marine Systems, tätigen einen Teil ihrer Geschäfte als Fertigungsaufträge, die nach der Percentage-of-Completion-Methode bilanziert werden, wonach die Umsätze entsprechend dem Fertigstellungsgrad auszuweisen sind. Diese Methode erfordert eine exakte Schätzung des Ausmaßes des Auftragsfortschritts. In Abhängigkeit von der Methode zur Bestimmung des Fertigstellungsgrades umfassen die wesentlichen Schätzungen die gesamten Auftragskosten, die bis zur Fertigstellung noch anfallenden Kosten, die gesamten Auftragserlöse, die Auftragsrisiken und andere Beurteilungen. Das Management der operativen Einheiten überprüft kontinuierlich alle Schätzungen, die im Rahmen der Fertigungsaufträge erforderlich sind, und passt diese gegebenenfalls an.

#### Steuern vom Einkommen und vom Ertrag

Da der Konzern in zahlreichen Ländern operativ tätig ist und Einkünfte erzielt, unterliegt er in einer Vielzahl von Steuerhoheiten den unterschiedlichsten Steuergesetzen. Um die weltweiten Steuerverbindlichkeiten des Konzerns zu bestimmen, sind daher wesentliche Beurteilungen erforderlich. Obwohl das Management davon ausgeht, eine vernünftige Einschätzung steuerlicher Unwägbarkeiten getroffen zu haben, kann nicht zugesichert werden, dass sich der tatsächliche Ausgang solcher steuerlicher Unwägbarkeiten mit der ursprünglichen Einschätzung deckt. Etwaige Unterschiede könnten in der jeweiligen Periode, in der die Angelegenheit endgültig entschieden wird, Auswirkungen auf die Steuerverbindlichkeiten und die latenten Steuern haben.

Zu jedem Bilanzstichtag beurteilt der Konzern, ob die Realisierbarkeit künftiger Steuervorteile für den Ansatz aktiver latenter Steuern hinreichend wahrscheinlich ist. Dies erfordert vom Management u.a. die Beurteilung der Steuervorteile, die sich aus den zur Verfügung stehenden Steuerstrategien und dem künftigen zu versteuernden Einkommen ergeben, sowie die Berücksichtigung weiterer positiver und negativer Faktoren. Die ausgewiesenen aktiven latenten

Steuern könnten sich verringern, falls die Schätzungen der geplanten steuerlichen Einkommen und die durch zur Verfügung stehende Steuerstrategien erzielbaren Steuervorteile gesenkt werden oder falls Änderungen der aktuellen Steuergesetzgebung den zeitlichen Rahmen oder den Umfang der Realisierbarkeit künftiger Steuervorteile beschränken. Für weitere Informationen zu potenziellen Steuervorteilen, für die keine aktiven latenten Steuern angesetzt worden sind, vgl. die Ausführungen unter Anhang-Nr. 31.

#### Leistungen an Arbeitnehmer

Die Bilanzierung von Pensionen und ähnlichen Verpflichtungen erfolgt in Übereinstimmung mit versicherungsmathematischen Bewertungen. Diese Bewertungen beruhen auf statistischen und anderen Faktoren, um auf diese Weise künftige Ereignisse zu antizipieren. Diese Faktoren umfassen u.a. versicherungsmathematische Annahmen wie Diskontierungszinssatz, erwarteter Kapitalertrag des Planvermögens, erwartete Gehaltssteigerungen, Sterblichkeitsraten und Steigerungsraten für Gesundheitsfürsorgekosten. Diese versicherungsmathematischen Annahmen können auf Grund von veränderten Markt- und Wirtschaftsbedingungen erheblich von den tatsächlichen Entwicklungen abweichen und deshalb zu einer wesentlichen Veränderung der Pensions- und ähnlichen Verpflichtungen sowie des zugehörigen künftigen Aufwands führen (vgl. Anhang-Nr. 15 bezüglich weiterer Informationen für Leistungen an Arbeitnehmer).

#### Rechtliche Risiken

Wie unter Anhang-Nr. 21 dargestellt, sind ThyssenKrupp Unternehmen in einigen Fällen Parteien in Rechtsstreitigkeiten. Der Ausgang dieser Fälle könnte einen wesentlichen Effekt auf die Vermögens-, Finanz- und Ertragslage des Konzerns haben. Das Management analysiert regelmäßig die aktuellen Informationen zu diesen Fällen und bildet Rückstellungen für wahrscheinliche Verpflichtungen einschließlich der geschätzten Rechtskosten. Für die Beurteilung werden interne und externe Rechtsanwälte eingesetzt. Im Rahmen der Entscheidung über die Notwendigkeit einer Rückstellung berücksichtigt das Management die Wahrscheinlichkeit eines ungünstigen Ausgangs und die Möglichkeit, die Höhe der Verpflichtung ausreichend verlässlich zu schätzen. Die Erhebung einer Klage oder die formale Geltendmachung eines Anspruchs gegen ThyssenKrupp Unternehmen oder die Angabe eines Rechtsstreits im Anhang bedeuten nicht automatisch, dass eine Rückstellung für das betreffende Risiko angemessen ist.



## Erläuterungen zur Konzern-Gewinn- und Verlustrechnung

### 26 Umsatzerlöse

Die Umsatzerlöse enthalten Dienstleistungsumsätze in Höhe von 9.462 (i. Vj. 9.130) Mio € sowie Umsatzerlöse aus Fertigungsaufträgen in Höhe von 6.101 (i. Vj. 7.276) Mio €.

### 27 Sonstige betriebliche Erträge

| Mio €                                                                                                        | 2008/2009  | 2009/2010  |
|--------------------------------------------------------------------------------------------------------------|------------|------------|
| Gewinne aus Abgang immaterieller Vermögenswerte, Sachanlagen und als Finanzinvestition gehaltener Immobilien | 37         | 22         |
| Währungsumrechnungsdifferenzen                                                                               | 1          | 120        |
| Versicherungsentschädigungen                                                                                 | 22         | 23         |
| Übrige                                                                                                       | 322        | 251        |
| <b>Insgesamt</b>                                                                                             | <b>382</b> | <b>416</b> |

Die übrigen sonstigen betrieblichen Erträge enthalten eine Vielzahl von betragsmäßig geringen Einzelsachverhalten der 714 (i. Vj. 744) konsolidierten Unternehmen.

### 28 Sonstige betriebliche Aufwendungen

| Mio €                                                                                                         | 2008/2009  | 2009/2010  |
|---------------------------------------------------------------------------------------------------------------|------------|------------|
| Verluste aus Abgang immaterieller Vermögenswerte, Sachanlagen und als Finanzinvestition gehaltener Immobilien | 28         | 20         |
| Währungsumrechnungsdifferenzen                                                                                | 9          | 85         |
| Rückstellungszuführungen                                                                                      | 99         | 41         |
| Nicht kundenauftragsbezogene Forschung und Entwicklung                                                        | 200        | 191        |
| Sonstige Steuern                                                                                              | 54         | 42         |
| Übrige                                                                                                        | 128        | 330        |
| <b>Insgesamt</b>                                                                                              | <b>518</b> | <b>709</b> |

In 2009/2010 beinhalten die übrigen sonstigen betrieblichen Aufwendungen nicht aktivierungsfähige Aufwendungen für noch nicht in Betrieb genommene Aggregate im Zusammenhang mit den Großprojekten in Brasilien und den USA in Höhe von 185 Mio €. Darüber hinaus sind in dieser Position eine Vielzahl von betragsmäßig geringen Einzelsachverhalten der 714 (i. Vj. 744) konsolidierten Unternehmen enthalten.

### 29 Zuwendungen der öffentlichen Hand

Im abgelaufenen Geschäftsjahr wurden Zuwendungen der öffentlichen Hand zur Erstattung von Aufwendungen des Konzerns in Höhe von 15 (i. Vj. 15) Mio € erfasst. Darüber hinaus führten im Vorjahr insbesondere im Zusammenhang mit dem Bau des neuen Stahlwerks in den USA gewährte Investitionszuwendungen der öffentlichen Hand zu einer Reduzierung von Anschaffungs- und Herstellungskosten in Höhe von 124 Mio €.

Die Gewährung der dargestellten Zuwendungen der öffentlichen Hand ist mit bestimmten Auflagen verbunden, von deren Erfüllung derzeit ausgegangen wird.

### 30 Finanzergebnis

| Mio €                                                                  | 2008/2009    | 2009/2010    |
|------------------------------------------------------------------------|--------------|--------------|
| <b>Ergebnis aus nach der Equity-Methode bilanzierten Beteiligungen</b> | <b>- 29</b>  | <b>56</b>    |
| Zinserträge aus Finanzguthaben                                         | 150          | 225          |
| Erwarteter Kapitalertrag aus Planvermögen                              | 113          | 119          |
| <b>Zinserträge</b>                                                     | <b>263</b>   | <b>344</b>   |
| Zinsaufwendungen aus Finanzschulden                                    | - 454        | - 540        |
| Zinsaufwand aus Pensions- und Gesundheitsfürsorgeverpflichtungen       | - 510        | - 456        |
| <b>Zinsaufwendungen</b>                                                | <b>- 964</b> | <b>- 996</b> |
| Erträge aus Beteiligungen                                              | 8            | 7            |
| Abschreibungen auf finanzielle Vermögenswerte                          | - 30         | - 7          |
| Ergebnis aus dem Abgang von finanziellen Vermögenswerten               | 0            | - 19         |
| Aufzinsung der sonstigen Rückstellungen                                | - 8          | - 15         |
| Übriges Finanzergebnis                                                 | 242          | 491          |
| <b>Sonstiges Finanzergebnis</b>                                        | <b>212</b>   | <b>457</b>   |
| <b>Finanzergebnis</b>                                                  | <b>- 518</b> | <b>- 139</b> |

Im Finanzergebnis sind neben den Zinserträgen aus Finanzguthaben weitere Zinserträge aus finanziellen Vermögenswerten, die nicht erfolgswirksam zum beizulegenden Zeitwert bewertet werden, in Höhe von 29 (i. Vj. 44) Mio € bzw. neben den Zinsaufwendungen aus Finanzschulden weitere Zinsaufwendungen aus finanziellen Verbindlichkeiten, die nicht erfolgswirksam zum beizulegenden Zeitwert bewertet werden, in Höhe von 33 (i. Vj. 92) Mio € enthalten.

In der Periode wurden Fremdkapitalkosten in Höhe von 365 (i. Vj. 235) Mio € aktiviert; hierdurch verbesserte sich das übrige Finanzergebnis entsprechend. Soweit einer bestimmten Investition eine Finanzierung konkret zugerechnet werden kann, werden die tatsächlichen Fremdfinanzierungskosten aktiviert. Sofern kein direkter Bezug hergeleitet werden kann, wird der durchschnittliche Fremdkapitalzinssatz des Konzerns der laufenden Periode berücksichtigt.



## 31 Steuern vom Einkommen und vom Ertrag

Die Ertragsteuern des Konzerns teilen sich wie folgt auf:

| Mio €                                                     | 2008/2009    | 2009/2010  |
|-----------------------------------------------------------|--------------|------------|
| Laufender Steueraufwand für den Berichtszeitraum          | 244          | 206        |
| Latenter Steueraufwand/(-ertrag) für den Berichtszeitraum | - 696        | 113        |
| Laufender Steuerertrag für Vorjahre                       | - 16         | - 156      |
| Latenter Steueraufwand/(-ertrag) für Vorjahre             | - 23         | 45         |
| <b>Insgesamt</b>                                          | <b>- 491</b> | <b>208</b> |
| Hiervon:                                                  |              |            |
| Laufender Steueraufwand/(-ertrag) Deutschland             | 25           | - 41       |
| Laufender Steueraufwand Ausland                           | 203          | 91         |
| Latenter Steueraufwand/(-ertrag) Deutschland              | - 495        | 24         |
| Latenter Steueraufwand/(-ertrag) Ausland                  | - 224        | 134        |

Das im abgelaufenen Geschäftsjahr 2009/2010 anzuwendende deutsche Körperschaftsteuerrecht sieht einen gesetzlichen Steuersatz von 15 % (i. Vj. 15 %) zuzüglich des Solidaritätszuschlags von 5,5 % vor. Die durchschnittliche Gewerbesteuerbelastung der Gesellschaften des ThyssenKrupp Konzerns beträgt 15,3 % (i. Vj. 15,1 %). Daher werden latente Steuern inländischer Gesellschaften zum 30. September 2010 mit einem Gesamtsteuersatz (einschließlich Solidaritätszuschlag) von 31,1 % (i. Vj. 30,9 %) bewertet. Die für ausländische Gesellschaften zu Grunde gelegten jeweiligen landesspezifischen Ertragsteuersätze liegen zwischen 5,7 % und 40,4 % (i. Vj. 5,7 % und 40,4 %). Steuersatzänderungen im Ausland führten im Geschäftsjahr 2009/2010 zu einem latenten Steueraufwand in Höhe von 7 Mio € (i. Vj. 5 Mio € latenter Steuerertrag).

Die im Eigenkapital berücksichtigten Steuern verteilen sich folgendermaßen auf die einzelnen Bereiche:

| Mio €                                    | 2008/2009    | 2009/2010    |
|------------------------------------------|--------------|--------------|
| Steueraufwand/(-ertrag) laut GuV-Ausweis | - 491        | 208          |
| Steuerertrag auf das sonstige Ergebnis   | - 284        | - 215        |
| Sonstige Veränderungen                   | 0            | - 93         |
| <b>Insgesamt</b>                         | <b>- 775</b> | <b>- 100</b> |

Im Inland bestehen im Konzern zum 30. September 2010 Verlustvorträge in Höhe von 794 (i. Vj. 1.026) Mio € für Körperschaftsteuer und Solidaritätszuschlag, Verlustvorträge in Höhe von 237 (i. Vj. 608) Mio € für Gewerbesteuer sowie Zinsvorträge in Höhe von 151 (i. Vj. 297) Mio €. Darüber hinaus bestehen ausländische steuerliche Verlustvorträge in Höhe von insgesamt 1.704 (i. Vj. 1.119) Mio €, unter

anderem 404 (i. Vj. 239) Mio € in Italien, 385 (i. Vj. 280) Mio € in Kanada, 192 (i. Vj. 51) Mio € in den USA und 190 (i. Vj. 152) Mio € in der Volksrepublik China, sowie ausländische Zinsvorträge in Höhe von 13 (i. Vj. 13) Mio €. Die Veränderung steuerlicher Verlustvorträge, Zinsvorträge und Steuergutschriften führte im Geschäftsjahr 2009/2010 zu einem latenten Steuerertrag von 118 (i. Vj. 244) Mio €.

Aktive latente Steuern werden nur dann angesetzt, wenn die Realisierbarkeit dieser Steuervorteile wahrscheinlich ist. Zur Bestimmung entsprechender Wertberichtigungen werden alle zurzeit bekannten positiven und negativen Einflussfaktoren auf die zukünftigen steuerlichen Ergebnisse berücksichtigt. Die dabei vorzunehmende Einschätzung kann sich durch zukünftige Entwicklungen verändern. Zum 30. September 2010 werden für im Konzern bestehende steuerliche Verlustvorträge in Höhe von 984 (i. Vj. 956) Mio € keine aktiven latenten Steuern angesetzt. Von diesen steuerlichen Verlustvorträgen ist ein Teilbetrag von 306 (i. Vj. 391) Mio € nach der bestehenden Rechtslage zeitlich und der Höhe nach unbegrenzt vortragsfähig, während Verlustvorträge in Höhe von 678 (i. Vj. 565) Mio € innerhalb der nächsten 20 Jahre verfallen werden, soweit sie nicht genutzt werden. Die nicht angesetzten aktiven latenten Steuern für steuerliche Verlustvorträge belaufen sich zum 30. September 2010 auf 251 (i. Vj. 239) Mio €. Darüber hinaus werden zum 30. September 2010 für abzugsfähige temporäre Differenzen in Höhe von 419 Mio € keine aktiven latenten Steuern angesetzt. Im Vorjahr wurden für Zinsvorträge in Höhe von 310 Mio € sowie für abzugsfähige temporäre Differenzen in Höhe von 624 Mio € keine aktiven latenten Steuern angesetzt. Im Geschäftsjahr 2009/2010 hat sich der Steueraufwand des Konzerns durch die Nutzung nicht angesetzter aktiver latenter Steuern für steuerliche Verlustvorträge, Zinsvorträge und Steuergutschriften sowie abzugsfähige temporäre Differenzen um 12 (i. Vj. 6) Mio € verringert. Für einbehaltene Gewinne bei ausländischen Tochterunternehmen sind keine passiven latenten Steuern angesetzt worden, weil diese Gewinne in absehbarer Zukunft nicht ausgeschüttet werden sollen.



Die aktiven und passiven latenten Steuern verteilen sich auf folgende Positionen:

Mio €

|                             | Aktive latente Steuern |              | Passive latente Steuern |              |
|-----------------------------|------------------------|--------------|-------------------------|--------------|
|                             | 30.09.2009             | 30.09.2010   | 30.09.2009              | 30.09.2010   |
| Immaterielle Vermögenswerte | 195                    | 421          | 346                     | 384          |
| Sachanlagen                 | 120                    | 83           | 815                     | 1.085        |
| Finanzielle Vermögenswerte  | 153                    | 124          | 7                       | 12           |
| Vorräte                     | 1.984                  | 1.958        | 191                     | 268          |
| Übrige Aktiva               | 377                    | 309          | 367                     | 255          |
| Pensionsrückstellungen      | 863                    | 1.052        | 76                      | 85           |
| Sonstige Rückstellungen     | 327                    | 273          | 130                     | 56           |
| Übrige Passiva              | 275                    | 271          | 2.181                   | 2.214        |
| Steuerliche Verlustvorträge | 555                    | 639          | —                       | —            |
| Zinsvorträge                | 84                     | 45           | —                       | —            |
| <b>Bruttobetrag</b>         | <b>4.933</b>           | <b>5.175</b> | <b>4.113</b>            | <b>4.359</b> |
| Wertberichtigungen          | – 489                  | – 365        | —                       | —            |
| Saldierungen                | – 3.806                | – 4.220      | – 3.806                 | – 4.220      |
| <b>Bilanzansatz</b>         | <b>638</b>             | <b>590</b>   | <b>307</b>              | <b>139</b>   |

Aktive und passive latente Steuern werden saldiert, soweit sie künftigen Belastungen oder Minderungen desselben Steuerpflichtigen gegenüber derselben Steuerbehörde zuzuordnen sind. Auf Konsolidierungssachverhalte entfallen zum 30. September 2010 aktive latente Steuern in Höhe von 68 (i. Vj. 75) Mio €.

Der ausgewiesene Steueraufwand des Geschäftsjahres 2009/2010 in Höhe von 208 Mio € ist um 145 Mio € niedriger als der erwartete Steueraufwand in Höhe von 353 Mio €, der sich bei

Anwendung des inländischen Gesamtsteuersatzes von 31,1 % auf das Ergebnis vor Steuern ergäbe. Im Geschäftsjahr 2008/2009 war der ausgewiesene Steuerertrag in Höhe von 491 Mio € um 240 Mio € niedriger als der bei einem inländischen Gesamtsteuersatz von 30,9 % erwartete Steuerertrag in Höhe von 731 Mio €. Die Überleitung vom erwarteten zum ausgewiesenen Steueraufwand/(-ertrag) ergibt sich aus der nachfolgenden Tabelle:

Mio €

|                                                                   | 2008/2009    | in %        | 2009/2010  | in %        |
|-------------------------------------------------------------------|--------------|-------------|------------|-------------|
| Erwarteter Steueraufwand/(-ertrag)                                | – 731        | 30,9        | 353        | 31,1        |
| Abweichung zu ausländischen Steuersätzen                          | 9            | – 0,4       | – 2        | – 0,2       |
| Änderung von Steuersätzen oder -gesetzen                          | – 5          | 0,2         | 5          | 0,4         |
| Besteuerung von Veräußerungsergebnissen                           | – 6          | 0,3         | – 7        | – 0,6       |
| Einkommenskorrekturen                                             | 72           | – 3,0       | 58         | 5,1         |
| Veränderung der Wertberichtigungen auf latente Steuern            | 191          | – 8,1       | – 29       | – 2,5       |
| Periodenfremder Steuerertrag                                      | – 39         | 1,7         | – 111      | – 9,8       |
| Ergebnisse aus nach der Equity-Methode bilanzierten Beteiligungen | 7            | – 0,3       | – 14       | – 1,2       |
| Sonstiges                                                         | 11           | – 0,5       | – 45       | – 4,0       |
| <b>Ausgewiesener Steueraufwand/(-ertrag)</b>                      | <b>– 491</b> | <b>20,8</b> | <b>208</b> | <b>18,3</b> |



## 32 Ergebnis je Aktie

Das Ergebnis je Aktie (basic earnings per share) berechnet sich wie folgt:

|                                                                           | 2008/2009                     |                           | 2009/2010                     |                           |
|---------------------------------------------------------------------------|-------------------------------|---------------------------|-------------------------------|---------------------------|
|                                                                           | Gesamt-<br>betrag<br>in Mio € | Ergebnis je<br>Aktie in € | Gesamt-<br>betrag<br>in Mio € | Ergebnis je<br>Aktie in € |
| <b>Zähler:</b>                                                            |                               |                           |                               |                           |
| Jahresüberschuss/(-fehlbetrag) (Anteil der Aktionäre der ThyssenKrupp AG) | - 1.857                       | - 4,01                    | 824                           | 1,77                      |
| <b>Nenner:</b>                                                            |                               |                           |                               |                           |
| Gewichteter Durchschnitt der Aktien (in Stück):                           | 463.473.492                   |                           | 463.983.893                   |                           |

### Ermittlung der für die Kalkulation des Ergebnisses je Aktie relevanten Aktienanzahl

Das Ergebnis je Aktie ergibt sich aus der Division des den Aktionären der ThyssenKrupp AG zurechenbaren Jahresüberschusses/(-fehlbetrages) durch die Anzahl der durchschnittlich im Umlauf befindlichen Aktien. Neu ausgegebene oder zurückgekaufte Aktien während einer Periode werden zeitanteilig für den Zeitraum, in dem sie sich in Umlauf befinden, berücksichtigt.

In 2008/2009 reduzierte sich der gewichtete Aktiendurchschnitt durch den Erwerb eigener Aktien im Februar/März 2008 sowie im Juli/August 2008. In 2009/2010 erhöhte sich der gewichtete Aktien-durchschnitt durch die Veräußerung eigener Anteile im Dezember 2009 und im März 2010 im Rahmen des rabattierten Aktienkaufs sowie durch die Veräußerung eigener Anteile im Mai 2010 im Rahmen des Belegschaftsaktienprogramms.

In den dargestellten Berichtsperioden gab es keine Verwässerungseffekte.

## 33 Zusätzliche Angaben zur Konzern-Gewinn- und Verlustrechnung

Folgender Personalaufwand ist in den Aufwandspositionen der Konzern-Gewinn- und Verlustrechnung enthalten:

| Mio €                                                                                                      | 2008/2009    | 2009/2010    |
|------------------------------------------------------------------------------------------------------------|--------------|--------------|
| Löhne und Gehälter**                                                                                       | 6.854        | 6.812        |
| Soziale Abgaben**                                                                                          | 1.323        | 1.308        |
| Netto-Pensionsaufwendungen - Leistungszusage*                                                              | 116          | 108          |
| Netto-Pensionsaufwendungen - Beitragszusage                                                                | 140          | 119          |
| Netto-Aufwendungen/(Erträge) der Zuschussverpflichtungen für Gesundheitsfürsorgeleistungen für Pensionäre* | - 43         | - 20         |
| Abfindungen, vorzeitiges Ausscheiden u.Ä.                                                                  | 835          | 38           |
| Aufwendungen für Unterstützung                                                                             | 429          | 407          |
| <b>Insgesamt</b>                                                                                           | <b>9.654</b> | <b>8.772</b> |

\* Ohne erwarteter Kapitalertrag des Planvermögens und Zinsaufwand aus Pensions- und Gesundheitsfürsorgeverpflichtungen, die in den Zinserträgen bzw. -aufwendungen ausgewiesen werden

\*\* Der Vorjahresbetrag wurde angepasst

Im Jahresdurchschnitt waren im Konzern beschäftigt:

|                        | 2008/2009      | 2009/2010      |
|------------------------|----------------|----------------|
| Steel Europe           | 37.244         | 34.923         |
| Steel Americas         | 1.486          | 2.434          |
| Stainless Global       | 12.018         | 11.341         |
| Materials Services     | 45.791         | 34.370         |
| Elevator Technology    | 43.186         | 43.062         |
| Plant Technology       | 13.206         | 12.975         |
| Components Technology  | 29.479         | 28.368         |
| Marine Systems         | 8.175          | 6.910          |
| Corporate              | 2.034          | 2.455          |
| <b>Insgesamt</b>       | <b>192.619</b> | <b>176.838</b> |
| Hiervon entfallen auf: |                |                |
| Arbeiter               | 116.384        | 101.357        |
| Angestellte            | 71.700         | 70.954         |
| Auszubildende          | 4.535          | 4.527          |

### Honorare und Dienstleistungen des Abschlussprüfers

Für die in den Geschäftsjahren 2008/2009 und 2009/2010 erbrachten Dienstleistungen des Konzernabschlussprüfers KPMG AG Wirtschaftsprüfungsgesellschaft sowie der Gesellschaften des weltweiten KPMG-Verbundes sind folgende Honorare (einschließlich Auslagen) als Aufwand erfasst worden:

| Mio €                         | 2008/2009 |                      | 2009/2010 |                      |
|-------------------------------|-----------|----------------------|-----------|----------------------|
|                               | Gesamt    | davon<br>Deutschland | Gesamt    | davon<br>Deutschland |
| Abschlussprüfungsleistungen   | 16        | 9                    | 15        | 8                    |
| Andere Bestätigungsleistungen | 3         | 1                    | 3         | 1                    |
| Steuerberatungsleistungen     | 1         | 0                    | 1         | 0                    |
| Sonstige Leistungen           | 4         | 3                    | 0         | 0                    |
| <b>Insgesamt</b>              | <b>24</b> | <b>13</b>            | <b>19</b> | <b>9</b>             |



Download der Tabellen unter:

[http://www.thyssenkrupp.com/financial-reports/09\\_10/de/](http://www.thyssenkrupp.com/financial-reports/09_10/de/)



Für die in den Geschäftsjahren 2008/2009 und 2009/2010 erbrachten Dienstleistungen der PricewaterhouseCoopers Wirtschaftsprüfungsgesellschaft sowie der Gesellschaften des weltweiten PricewaterhouseCoopers-Verbundes sind folgende Honorare (einschließlich Auslagen) als Aufwand erfasst worden:

| Mio €                         | 2008/2009 |                      | 2009/2010 |                      |
|-------------------------------|-----------|----------------------|-----------|----------------------|
|                               | Gesamt    | davon<br>Deutschland | Gesamt    | davon<br>Deutschland |
| Prüfungsleistungen            | 10        | 4                    | 8         | 3                    |
| Andere Bestätigungsleistungen | 4         | 1                    | 3         | 1                    |
| Steuerberatungsleistungen     | 2         | 1                    | 2         | 0                    |
| Sonstige Leistungen           | 1         | 0                    | 1         | 0                    |
| <b>Insgesamt</b>              | <b>17</b> | <b>6</b>             | <b>14</b> | <b>4</b>             |

Die Abschlussprüfungs- und die Prüfungsleistungen beinhalten vor allem die Honorare für die Konzernabschlussprüfung sowie die gesetzlich vorgeschriebenen Prüfungen der ThyssenKrupp AG und der in den Konzernabschluss einbezogenen Tochterunternehmen. Die Honorare für andere Bestätigungsleistungen umfassen im Wesentlichen die prüferische Durchsicht der Zwischenabschlüsse sowie die Honorare für Due-Diligence-Leistungen im Zusammenhang mit Akquisitionen und Desinvestitionen. In den Honoraren für Steuerberatungsleistungen sind insbesondere Honorare für die Steuerberatung bei laufenden und geplanten Transaktionen, für die Erstellung von Steuererklärungen, für steuerliche Due-Diligence-Leistungen, für Steuerberatung im Zusammenhang mit Projekten und konzerninternen Reorganisationen sowie die steuerliche Beratung von in das Ausland entsandten Mitarbeitern enthalten. Die Honorare für sonstige Leistungen umfassen überwiegend die Honorare für projektbezogene Beratungsleistungen.

## Erläuterungen zur Konzern-Kapitalflussrechnung

### 34 Zusätzliche Informationen zur Kapitalflussrechnung

Der in der Kapitalflussrechnung betrachtete Zahlungsmittelfonds entspricht der Bilanzposition „Zahlungsmittel und Zahlungsmitteläquivalente“.

#### Nicht zahlungswirksame Investitionstätigkeiten

Im Geschäftsjahr 2009/2010 ergab sich aus dem Erwerb und der Erstkonsolidierung von Gesellschaften ein Zugang von langfristigen Vermögenswerten in Höhe von 27 (i. Vj. 51) Mio €.

Der zahlungsunwirksame Zugang von Vermögenswerten aus Finance Lease im Geschäftsjahr 2009/2010 beträgt 13 (i. Vj. 11) Mio €.

#### Nicht zahlungswirksame Finanzierungstätigkeiten

Im Geschäftsjahr 2009/2010 erfolgte durch den Erwerb und die Erstkonsolidierung von Gesellschaften ein Zugang von Brutto-Finanzschulden in Höhe von 19 (i. Vj. 24) Mio €.

## Sonstige Angaben

### 35 Erklärungen zum Deutschen Corporate Governance Kodex nach § 161 AktG

Am 01. Oktober 2010 haben Vorstand und Aufsichtsrat die Entsprechenserklärung nach § 161 AktG abgegeben und den Aktionären auf der Website der Gesellschaft dauerhaft öffentlich zugänglich gemacht. Die ThyssenKrupp AG entspricht den Empfehlungen des Deutschen Corporate Governance Kodex in der Fassung vom 26. Mai 2010 und hat den Empfehlungen des Kodex im Zeitraum vom 01. Oktober 2009 bis zur Aufsichtsratssitzung am 03. September 2010 (Kodexfassung vom 18. Juni 2009) und vom 04. September 2010 bis zum 30. September 2010 (Kodexfassung vom 26. Mai 2010) entsprochen. Die Empfehlung in Ziffer 5.4.5 der Kodex-Fassung vom 26. Mai 2010 wird für den Zeitraum von deren Inkrafttreten am 02. Juli 2010 bis zum Ablauf der Hauptversammlung der ThyssenKrupp AG am 21. Januar 2011 nicht uneingeschränkt angewandt. Ab diesem Zeitpunkt wird die ThyssenKrupp AG wieder sämtlichen Empfehlungen des Kodex entsprechen.

Die Entsprechenserklärung der börsennotierten Tochtergesellschaft Eisen- und Hüttenwerke AG ist am 01. Oktober 2010 abgegeben und den Aktionären auf der Website der Gesellschaft dauerhaft öffentlich zugänglich gemacht worden.



## 36 Inanspruchnahme von Befreiungsvorschriften

Nachfolgende inländische Tochterunternehmen in der Rechtsform einer Kapitalgesellschaft bzw. Personengesellschaft im Sinne des § 264a HGB haben in Teilen von der Befreiungsvorschrift gemäß § 264 Abs. 3 und § 264b HGB Gebrauch gemacht.

### A

|                                                    |            |
|----------------------------------------------------|------------|
| AGOZAL Oberflächenveredelung GmbH                  | Neuwied    |
| Aloverzee Handelsgesellschaft mbH                  | Düsseldorf |
| AWG Industrieanlagen und Wassertechnik GmbH Berlin | Berlin     |

### B

|                                          |           |
|------------------------------------------|-----------|
| Becker & Co. GmbH                        | Neuwied   |
| BERCO Deutschland GmbH                   | Ennepetal |
| BIS Blohm + Voss Inspection Service GmbH | Hamburg   |
| Bleuel & Röhling GmbH                    | Burghaun  |
| Blohm + Voss Repair GmbH                 | Hamburg   |
| Blohm + Voss Shipyards & Services GmbH   | Hamburg   |
| Blohm + Voss Shipyards GmbH              | Hamburg   |

### C

|                     |             |
|---------------------|-------------|
| Christian Hein GmbH | Langenhagen |
|---------------------|-------------|

### D

|                                                        |           |
|--------------------------------------------------------|-----------|
| Dr. Mertens Edelstahlhandel GmbH                       | Offenbach |
| DWR - Deutsche Gesellschaft für Weißblechrecycling mbH | Andernach |

### E

|                                        |               |
|----------------------------------------|---------------|
| EBOR Edelstahl GmbH                    | Sachsenheim   |
| EH Güterverkehr GmbH                   | Duisburg      |
| Eisenbahn und Häfen GmbH               | Duisburg      |
| Eisenmetall Handelsgesellschaft mbH    | Gelsenkirchen |
| ELEG Europäische Lift + Escalator GmbH | Düsseldorf    |
| Emder Werft und Dockbetriebe GmbH      | Emden         |
| Erich Weit GmbH                        | München       |

### F

|                             |                |
|-----------------------------|----------------|
| Freiburger Stahlhandel GmbH | Freiburg i.Br. |
|-----------------------------|----------------|

### G

|                         |             |
|-------------------------|-------------|
| GMT Aufzug-Service GmbH | Ettlingen   |
| GWH Aufzüge GmbH        | Himmelstadt |

### H

|                                        |               |
|----------------------------------------|---------------|
| Haisch Aufzüge GmbH                    | Gingen/Fils   |
| Hanseatische Aufzugsbau GmbH           | Rostock       |
| Health Care Solutions GmbH             | Düsseldorf    |
| Herzog Coilex GmbH                     | Stuttgart     |
| Hoesch Hohenlimburg GmbH               | Hagen         |
| Hövelmann & Co. Eisengroßhandlung GmbH | Gelsenkirchen |
| Howaldtswerke-Deutsche Werft GmbH      | Kiel          |

### I

|                                                    |       |
|----------------------------------------------------|-------|
| IKL Ingenieurkontor Lübeck GmbH                    | Kiel  |
| ImmoVer Gesellschaft für Grundstücksverwaltung mbH | Essen |
| Innovative Meerestechnik GmbH                      | Emden |

### J

|                |     |
|----------------|-----|
| Jacob Bek GmbH | Ulm |
|----------------|-----|

### K

|                                                 |          |
|-------------------------------------------------|----------|
| KBS Kokereibetriebsgesellschaft Schwelgern GmbH | Duisburg |
| Kraemer & Freund Handel GmbH                    | Hagen    |

### L

|                                    |                  |
|------------------------------------|------------------|
| LiftEquip GmbH Elevator Components | Neuhausen a.d.F. |
| Liftservice und Montage GmbH       | Saarbrücken      |

### M

|                                  |            |
|----------------------------------|------------|
| Max Cochius GmbH                 | Berlin     |
| MgF Magnesium Flachprodukte GmbH | Freiburg   |
| MONTAN GmbH Assekuranz-Makler    | Düsseldorf |

### N

|                        |                   |
|------------------------|-------------------|
| Nothelfer Planung GmbH | Wadern-Lockweiler |
|------------------------|-------------------|

### O

|                                    |            |
|------------------------------------|------------|
| Otto Wolff Handelsgesellschaft mbH | Düsseldorf |
| Otto Wolff U.S. Sales GmbH         | Andernach  |

### P

|             |        |
|-------------|--------|
| Polysius AG | Beckum |
|-------------|--------|

### R

|                              |           |
|------------------------------|-----------|
| Rasselstein GmbH             | Andernach |
| Rasselstein Verwaltungs GmbH | Neuwied   |
| Reisebüro Dr. Tigges GmbH    | Essen     |
| Rothe Erde GmbH              | Dortmund  |

### S

|                                                        |                      |
|--------------------------------------------------------|----------------------|
| Siegfried Schüssler Feuerungsbau GmbH                  | Bispingen            |
| smbChromstahl GmbH                                     | Hannover-Langenhagen |
| Stahlhauser Liegenschaften Verwaltungsgesellschaft mbH | Essen                |
| SVG Steinwerder Verwaltungsgesellschaft mbH            | Hamburg              |

### T

|                                                                             |                  |
|-----------------------------------------------------------------------------|------------------|
| Tepper Aufzüge GmbH                                                         | Münster          |
| Thyssen Liegenschaften Verwaltungs- und Verwertungs GmbH & Co. KG Industrie | Essen            |
| Thyssen Liegenschaften Verwaltungs- und Verwertungs GmbH & Co. KG Stahl     | Essen            |
| Thyssen Rheinstahl Technik GmbH                                             | Düsseldorf       |
| Thyssen Schulte Werkstoffhandel GmbH                                        | Düsseldorf       |
| Thyssen Stahl GmbH                                                          | Düsseldorf       |
| ThyssenKrupp Academy GmbH                                                   | Düsseldorf       |
| ThyssenKrupp Accessibility Holding GmbH                                     | Essen            |
| ThyssenKrupp AdMin GmbH                                                     | Düsseldorf       |
| ThyssenKrupp Aufzüge GmbH                                                   | Stuttgart        |
| ThyssenKrupp Aufzugswerke GmbH                                              | Neuhausen a.d.F. |



|                                                                      |                      |
|----------------------------------------------------------------------|----------------------|
| ThyssenKrupp Automotive Systems GmbH                                 | Essen                |
| ThyssenKrupp Bauservice GmbH                                         | Hückelhoven          |
| ThyssenKrupp Bausysteme GmbH                                         | Kreuztal             |
| ThyssenKrupp Bilstein Suspension GmbH                                | Ennepetal            |
| ThyssenKrupp Bilstein Tuning GmbH                                    | Ennepetal            |
| ThyssenKrupp Business Services GmbH                                  | Essen                |
| ThyssenKrupp DeliCate GmbH                                           | Düsseldorf           |
| ThyssenKrupp Dienstleistungen GmbH                                   | Düsseldorf           |
| ThyssenKrupp Drauz Nothelfer GmbH                                    | Heilbronn            |
| ThyssenKrupp EGM GmbH                                                | Langenhagen          |
| ThyssenKrupp Electrical Steel GmbH                                   | Gelsenkirchen        |
| ThyssenKrupp Electrical Steel Verwaltungsgesellschaft mbH            | Gelsenkirchen        |
| ThyssenKrupp Elevator (CENE) GmbH                                    | Essen                |
| ThyssenKrupp Elevator (CENE) Infrastruktur GmbH                      | Essen                |
| ThyssenKrupp Elevator (EBC) GmbH                                     | Berlin               |
| ThyssenKrupp Elevator (ES/PBB) GmbH                                  | Essen                |
| ThyssenKrupp Elevator AG                                             | Düsseldorf           |
| ThyssenKrupp Elevator die Fünfte GmbH                                | Essen                |
| ThyssenKrupp Elevator Research GmbH                                  | Düsseldorf           |
| ThyssenKrupp Energievertriebs GmbH                                   | Essen                |
| ThyssenKrupp Erste Beteiligungsgesellschaft mbH                      | Düsseldorf           |
| ThyssenKrupp ExperSite GmbH                                          | Kassel               |
| ThyssenKrupp Facilities Services GmbH                                | Düsseldorf           |
| ThyssenKrupp Fahrtreppen GmbH                                        | Hamburg              |
| ThyssenKrupp Federn GmbH                                             | Hagen                |
| ThyssenKrupp Fördertechnik GmbH                                      | Essen                |
| ThyssenKrupp Gerlach GmbH                                            | Homburg/Saar         |
| ThyssenKrupp GfT Bautechnik GmbH                                     | Essen                |
| ThyssenKrupp GfT Gleistechnik GmbH                                   | Essen                |
| ThyssenKrupp GfT Tiefbautechnik GmbH                                 | Essen                |
| ThyssenKrupp Grundbesitz Verwaltungs GmbH                            | Essen                |
| ThyssenKrupp Grundbesitz-Vermietungs GmbH & Co. KG                   | Essen                |
| ThyssenKrupp Immobilien Verwaltungs GmbH & Co. KG Krupp Hoesch Stahl | Essen                |
| ThyssenKrupp Immobilien Verwaltungs GmbH & Co. KG Stahl              | Essen                |
| ThyssenKrupp Immobilienentwicklungs Concordiahütte GmbH              | Oberhausen           |
| ThyssenKrupp Immobilienentwicklungs Krefeld GmbH                     | Oberhausen           |
| ThyssenKrupp Industrial Services Holding GmbH                        | Düsseldorf           |
| ThyssenKrupp Information Services GmbH                               | Düsseldorf           |
| ThyssenKrupp IT Services GmbH                                        | Essen                |
| ThyssenKrupp Krause GmbH                                             | Bremen               |
| ThyssenKrupp KST GmbH                                                | Hohenstein-Ernstthal |
| ThyssenKrupp Lasertechnik GmbH                                       | Ravensburg           |
| ThyssenKrupp Management Consulting GmbH                              | Düsseldorf           |
| ThyssenKrupp Mannex GmbH                                             | Düsseldorf           |
| ThyssenKrupp Marine Systems AG                                       | Hamburg              |
| ThyssenKrupp Marine Systems Beteiligungen GmbH                       | Essen                |
| ThyssenKrupp Materials International GmbH                            | Düsseldorf           |
| ThyssenKrupp Metallurgie GmbH                                        | Essen                |
| ThyssenKrupp MetalServ GmbH                                          | Düsseldorf           |
| ThyssenKrupp MinEnergy GmbH                                          | Essen                |
| ThyssenKrupp Nirosta GmbH                                            | Krefeld              |
| ThyssenKrupp Nirosta Präzisionsband GmbH                             | Krefeld              |
| ThyssenKrupp Plastics GmbH                                           | Düsseldorf           |

|                                                        |              |
|--------------------------------------------------------|--------------|
| ThyssenKrupp Plastics International GmbH               | Düsseldorf   |
| ThyssenKrupp Presta Chemnitz GmbH                      | Chemnitz     |
| ThyssenKrupp Presta Ilsenburg GmbH                     | Ilsenburg    |
| ThyssenKrupp Presta München/Esslingen GmbH             | München      |
| ThyssenKrupp Presta SteerTec GmbH                      | Düsseldorf   |
| ThyssenKrupp Presta SteerTec Mülheim GmbH              | Mülheim      |
| ThyssenKrupp Presta SteerTec Schönebeck GmbH           | Schönebeck   |
| ThyssenKrupp Printmedia GmbH                           | Duisburg     |
| ThyssenKrupp Real Estate GmbH                          | Essen        |
| ThyssenKrupp Risk and Insurance Services GmbH          | Essen        |
| ThyssenKrupp Sägenstahlcenter GmbH                     | Duisburg     |
| ThyssenKrupp Schulte GmbH                              | Düsseldorf   |
| ThyssenKrupp Stahl Immobilien GmbH                     | Duisburg     |
| ThyssenKrupp Stahlkontor GmbH                          | Düsseldorf   |
| ThyssenKrupp Stahl-Service-Center GmbH                 | Krefeld      |
| ThyssenKrupp Stainless International GmbH              | Krefeld      |
| ThyssenKrupp Steel Europe AG                           | Duisburg     |
| ThyssenKrupp Steel Zweite Beteiligungsgesellschaft mbH | Duisburg     |
| ThyssenKrupp System Engineering GmbH                   | Essen        |
| ThyssenKrupp Systems & Services GmbH                   | Düsseldorf   |
| ThyssenKrupp Tailored Blanks GmbH                      | Duisburg     |
| ThyssenKrupp Technologies Beteiligungen GmbH           | Essen        |
| ThyssenKrupp Transrapid GmbH                           | Kassel       |
| ThyssenKrupp Treppenlifte GmbH                         | Neuss        |
| ThyssenKrupp Umformtechnik GmbH                        | Ludwigsfelde |
| ThyssenKrupp VDM GmbH                                  | Werdohl      |
| ThyssenKrupp Xervon Energy GmbH                        | Duisburg     |
| ThyssenKrupp Xervon GmbH                               | Düsseldorf   |
| ThyssenKrupp Xervon Utilities GmbH                     | Düsseldorf   |

## U

|                                      |                |
|--------------------------------------|----------------|
| Uhde GmbH                            | Dortmund       |
| Uhde High Pressure Technologies GmbH | Hagen          |
| Uhde Inventa-Fischer GmbH            | Berlin         |
| Uhde Services and Consulting GmbH    | Dortmund       |
| Uhde Services GmbH                   | Haltern am See |

## V

|                                            |          |
|--------------------------------------------|----------|
| Vermögensverwaltungsgesellschaft EZM mbH   | Grünwald |
| Vermögensverwaltungsgesellschaft KWT mbH   | Grünwald |
| Vermögensverwaltungsgesellschaft S + S mbH | Grünwald |
| Vermögensverwaltungsgesellschaft TIS mbH   | Grünwald |

Nachfolgende niederländische Tochterunternehmen haben von der Befreiungsvorschrift gemäß Artikel 2:403 des niederländischen Bürgerlichen Gesetzbuches (Civil Code of the Netherlands) Gebrauch gemacht.

## T

|                                      |           |
|--------------------------------------|-----------|
| ThyssenKrupp Slab International B.V. | Brille    |
| ThyssenKrupp Veerhaven B.V.          | Rotterdam |

## U

|                                 |           |
|---------------------------------|-----------|
| Uhde Fertilizer Technology B.V. | Amsterdam |
|---------------------------------|-----------|



# 37 Aufstellung des Anteilsbesitzes

## VOLL KONSOLIDIERTE TOCHTERUNTERNEHMEN (Stand 30. September 2010)

| Laufende Nummer                  | Name und Sitz                                                            | Währung | Gesellschaftskapital in 1.000 € bzw. Fremdwährung | Anteil am Kapital in % | gehalten über laufende Nummer |
|----------------------------------|--------------------------------------------------------------------------|---------|---------------------------------------------------|------------------------|-------------------------------|
| <b>STEEL EUROPE</b>              |                                                                          |         |                                                   |                        |                               |
| <b>ThyssenKrupp Steel Europe</b> |                                                                          |         |                                                   |                        |                               |
| 1                                | DE-VerwaltungsGmbH, Duisburg                                             |         | 25                                                | 100,00                 | 4                             |
| 2                                | KBS Kokereibetriebsgesellschaft Schwelgern GmbH, Duisburg                |         | 25                                                | 100,00                 | 4                             |
| 3                                | Pruna Betreiber GmbH, Grünwald                                           |         | 150                                               | 0,00 <sup>2)</sup>     | 4                             |
| 4                                | ThyssenKrupp Steel Europe AG, Duisburg                                   |         | 438.771                                           | 99,53                  | 648                           |
| 5                                | ThyssenKrupp Galmed, S.A., Sagunto, Spanien                              |         | 48.150                                            | 100,00                 | 665                           |
|                                  |                                                                          |         |                                                   |                        | 4 25,00 %                     |
| <b>Processing</b>                |                                                                          |         |                                                   |                        |                               |
| 6                                | Becker & Co. GmbH, Neuwied                                               |         | 768                                               | 100,00                 | 11                            |
| 7                                | DWR - Deutsche Gesellschaft für Weißblechrecycling mbH, Andernach        |         | 25                                                | 100,00                 | 10                            |
| 8                                | Hoesch Hohenlimburg GmbH, Hagen                                          |         | 15.340                                            | 99,50                  | 4                             |
| 9                                | Otto Wolff U.S. Sales GmbH, Andernach                                    |         | 26                                                | 100,00                 | 10                            |
| 10                               | Rasselstein GmbH, Andernach                                              |         | 40.960                                            | 99,50                  | 11                            |
| 11                               | Rasselstein Verwaltungs GmbH, Neuwied                                    |         | 93.500                                            | 100,00                 | 4                             |
|                                  |                                                                          |         |                                                   |                        | 62 59,23 %                    |
|                                  |                                                                          |         |                                                   |                        | 62 40,77 %                    |
| 12                               | ThyssenKrupp Bausysteme GmbH, Kreuztal                                   |         | 7.670                                             | 100,00                 | 4                             |
| 13                               | ThyssenKrupp Electrical Steel GmbH, Gelsenkirchen                        |         | 15.163                                            | 99,58                  | 14                            |
|                                  |                                                                          |         |                                                   |                        | 4 87,62 %                     |
|                                  |                                                                          |         |                                                   |                        | 4 7,67 %                      |
|                                  |                                                                          |         |                                                   |                        | 648 4,29 %                    |
| 14                               | ThyssenKrupp Electrical Steel Verwaltungsgesellschaft mbH, Gelsenkirchen |         | 30.000                                            | 100,00                 | 4                             |
|                                  |                                                                          |         |                                                   |                        | 62 62,46 %                    |
|                                  |                                                                          |         |                                                   |                        | 62 37,54 %                    |
| 15                               | ThyssenKrupp Sägenstahlcenter GmbH, Duisburg                             |         | 1.023                                             | 100,00                 | 4                             |
| 16                               | ThyssenKrupp Tailored Blanks GmbH, Duisburg                              |         | 4.116                                             | 100,00                 | 4                             |
| 17                               | ThyssenKrupp Umformtechnik GmbH, Ludwigsfelde                            |         | 15.000                                            | 100,00                 | 4                             |
|                                  |                                                                          |         |                                                   |                        | 651 94,99 %                   |
|                                  |                                                                          |         |                                                   |                        | 651 5,01 %                    |
| 18                               | EURISOL S.A., Steenvoorde, Frankreich                                    |         | 151                                               | 74,94                  | 21                            |
|                                  |                                                                          |         |                                                   |                        | 12 74,91 %                    |
|                                  |                                                                          |         |                                                   |                        | 12 0,03 %                     |
| 19                               | Hoesch Bausysteme Gesellschaft m.b.H., Wien, Österreich                  |         | 1.454                                             | 100,00                 | 669                           |
| 20                               | Isocab France S.A.S., Dunkerque, Frankreich                              |         | 610                                               | 100,00                 | 684                           |
| 21                               | Isocab N.V., Harelbeke-Bavikhove, Belgien                                |         | 10.750                                            | 100,00                 | 73                            |
|                                  |                                                                          |         |                                                   |                        | 4 99,98 %                     |
|                                  |                                                                          |         |                                                   |                        | 4 0,02 %                      |
| 22                               | Isocab Vietnam JV Company, Ho Chi Minh, Vietnam                          | USD     | 2.280                                             | 53,68                  | 21                            |
| 23                               | Krupp Camford Pressings Ltd., Llanelli, Großbritannien                   | GBP     | 24.594                                            | 100,00                 | 674                           |
| 24                               | ThyssenKrupp Aceros y Servicios S.A., Santiago, Chile                    | CLP     | 4.988.440 <sup>1)</sup>                           | 100,00                 | 4                             |
| 25                               | ThyssenKrupp Automotive Chassis Products UK PLC, Durham, Großbritannien  | GBP     | 10.208                                            | 100,00                 | 674                           |
| 26                               | ThyssenKrupp Body Stampings Ltd., Cannock, Großbritannien                | GBP     | 132                                               | 100,00                 | 674                           |
| 27                               | ThyssenKrupp Bouwsystemen B. V., Veenendaal, Niederlande                 |         | 1.357                                             | 100,00                 | 73                            |
| 28                               | ThyssenKrupp Building Systems Ltd., Birmingham, Großbritannien           | GBP     | 5                                                 | 100,00                 | 690                           |
| 29                               | ThyssenKrupp Byggesystem A/S, Støvring, Dänemark                         | DKK     | 500                                               | 100,00                 | 12                            |
| 30                               | ThyssenKrupp Comercial Colombia S.A., Bogota, Kolumbien                  | COP     | 272.610 <sup>1)</sup>                             | 100,00                 | 24                            |
| 31                               | ThyssenKrupp Electrical Steel India Private Ltd., Mumbai/Nashik, Indien  | INR     | 3.149.349                                         | 100,00                 | 13                            |
|                                  |                                                                          |         |                                                   |                        | 14 100,00 % <sup>3)</sup>     |
|                                  |                                                                          |         |                                                   |                        | 14 0,00 % <sup>3)</sup>       |
| 32                               | ThyssenKrupp Electrical Steel Italia S.r.l., Mailand, Italien            |         | 2.000                                             | 100,00                 | 686                           |
| 33                               | ThyssenKrupp Electrical Steel UGO S.A.S, Isbergues, Frankreich           |         | 5.235                                             | 100,00                 | 13                            |
| 34                               | ThyssenKrupp Épitoelemek Kft, Budapest, Ungarn                           | HUF     | 2.520.000                                         | 100,00                 | 19                            |
| 35                               | ThyssenKrupp gradjevinski elementi d.o.o., Lepoglava, Kroatien           | HRK     | 20                                                | 100,00                 | 19                            |

<sup>1)</sup> Jahresabschluss nicht 30.09. <sup>2)</sup> nach IFRS Vorschriften einbezogen <sup>3)</sup> Splitteranteil ab der 4. Kommastelle <sup>4)</sup> Konzernmutter



## VOLL KONSOLIDIERTE TOCHTERUNTERNEHMEN (Stand 30. September 2010)

| Laufende Nummer                     | Name und Sitz                                                                            | Währung | Gesellschafts-kapital in 1.000 € bzw. Fremdwährung | Anteil am Kapital in % | gehalten über laufende Nummer                        |
|-------------------------------------|------------------------------------------------------------------------------------------|---------|----------------------------------------------------|------------------------|------------------------------------------------------|
| 36                                  | ThyssenKrupp Metal Forming (Wuhan) Ltd., Wuhan, VR China                                 |         | 20.000 <sup>1)</sup>                               | 100,00                 | 680                                                  |
| 37                                  | ThyssenKrupp Otomotiv Parçaları Sanayi ve Ticaret Limited Sirketi, GEBZE Kocaeli, Türkei | TRY     | 5 <sup>1)</sup>                                    | 100,00                 | 52 99,50 %<br>674 0,50 %                             |
| 38                                  | ThyssenKrupp Prisma S.A.S., Messempré, Frankreich                                        |         | 5.400                                              | 100,00                 | 684                                                  |
| 39                                  | ThyssenKrupp Sisteme pentru Constructii S.R.L., Bukarest, Rumänien                       | RON     | 55                                                 | 100,00                 | 19                                                   |
| 40                                  | ThyssenKrupp Sofedit España, S.A., Valladolid, Spanien                                   |         | 361                                                | 100,00                 | 42                                                   |
| 41                                  | ThyssenKrupp Sofedit Polska Sp.zo.o., Wroclaw, Polen                                     | PLN     | 17.976                                             | 100,00                 | 42                                                   |
| 42                                  | ThyssenKrupp Sofedit S.A.S., Versailles, Frankreich                                      |         | 8.761                                              | 100,00                 | 684                                                  |
| 43                                  | ThyssenKrupp Sofedit Sud Ouest S.A.S., Arudy, Frankreich                                 |         | 8.537                                              | 100,00                 | 684                                                  |
| 44                                  | ThyssenKrupp stavební systémy s.r.o., Nymburk, Tschechische Republik                     | CZK     | 1.000 <sup>1)</sup>                                | 100,00                 | 19 98,00 %<br>12 2,00 %                              |
| 45                                  | ThyssenKrupp Systembau Austria Gesellschaft m.b.H., Wien, Österreich                     |         | 51                                                 | 100,00                 | 669                                                  |
| 46                                  | ThyssenKrupp Tailored Blanks Celik Sanayi VE Ticaret Ltd., Nilüfer/ Bursa, Türkei        | TRY     | 2.803                                              | 100,00                 | 16 96,47 %<br>49 3,53 %                              |
| 47                                  | ThyssenKrupp Tailored Blanks Czech Republik, s.r.o., Ostrava, Tschechische Republik      | CZK     | 42.000                                             | 99,95                  | 16                                                   |
| 48                                  | ThyssenKrupp Tailored Blanks S.A. de C.V., Puebla, Mexico                                | MXN     | 50                                                 | 100,00                 | 54 100,00 % <sup>3)</sup><br>55 0,00 % <sup>3)</sup> |
| 49                                  | ThyssenKrupp Tailored Blanks S.r.l., Turin, Italien                                      |         | 3.810                                              | 52,50                  | 686                                                  |
| 50                                  | ThyssenKrupp Tailored Blanks Sverige AB, Olofström, Schweden                             |         | 1.940                                              | 100,00                 | 16                                                   |
| 51                                  | ThyssenKrupp Tailored Blanks (Wuhan) Ltd., Wuhan, VR China                               | USD     | 21.000 <sup>1)</sup>                               | 100,00                 | 680 68,43 %<br>16 31,57 %                            |
| 52                                  | ThyssenKrupp Tallent Ltd., County Durham, Großbritannien                                 | GBP     | 1.000                                              | 100,00                 | 25                                                   |
| 53                                  | TKAS (Changchun) Tailored Blanks Ltd., Changchun, VR China                               | USD     | 10.000                                             | 55,00                  | 680                                                  |
| 54                                  | TWB Company, LLC, Lansing/Michigan, USA                                                  | USD     | 1.500                                              | 55,00                  | 205                                                  |
| 55                                  | TWB de Mexico, S.A. de C.V., Saltillo, Coahuila, Mexico                                  | MXN     | 50                                                 | 100,00                 | 54 99,00 %<br>58 1,00 %                              |
| 56                                  | TWB Industries, S.A. de C.V., Saltillo, Coahuila, Mexico                                 | MXN     | 50                                                 | 100,00                 | 54 99,00 %<br>58 1,00 %                              |
| 57                                  | TWB of Indiana, Inc., North Vernon/ Indiana, USA                                         | USD     | 1                                                  | 100,00                 | 54                                                   |
| 58                                  | TWB of Ohio, Inc., Columbus/Ohio, USA                                                    | USD     | 0                                                  | 100,00                 | 54                                                   |
| <b>Other Companies Steel Europe</b> |                                                                                          |         |                                                    |                        |                                                      |
| 59                                  | AGOZAL Oberflächenveredelung GmbH, Neuwied                                               |         | 1.540                                              | 100,00                 | 4                                                    |
| 60                                  | DOC Dortmunder Oberflächencentrum GmbH, Dortmund                                         |         | 5.880                                              | 100,00                 | 4                                                    |
| 61                                  | EH Güterverkehr GmbH, Duisburg                                                           |         | 1.534                                              | 100,00                 | 63                                                   |
| 62                                  | Eisen- und Hüttenwerke AG, Andernach                                                     |         | 45.056                                             | 87,98                  | 4                                                    |
| 63                                  | Eisenbahn und Häfen GmbH, Duisburg                                                       |         | 2.046                                              | 100,00                 | 4                                                    |
| 64                                  | MgF Magnesium Flachprodukte GmbH, Freiberg                                               |         | 500                                                | 100,00                 | 4                                                    |
| 65                                  | ThyssenKrupp Lasertechnik GmbH, Ravensburg                                               |         | 25                                                 | 100,00                 | 4                                                    |
| 66                                  | ThyssenKrupp Printmedia GmbH, Duisburg                                                   |         | 26                                                 | 100,00                 | 4                                                    |
| 67                                  | ThyssenKrupp Steel Zweite Beteiligungsgesellschaft mbH, Duisburg                         |         | 25                                                 | 100,00                 | 4                                                    |
| 68                                  | B.V. Stuwadoors-Maatschappij Kruwal, Rotterdam, Niederlande                              |         | 45                                                 | 75,00                  | 73 50,00 %<br>4 25,00 %                              |
| 69                                  | Ertsoverslagbedrijf Europoort C.V., Rotterdam, Niederlande                               |         | 4.583                                              | 75,00                  | 73 50,00 %<br>4 25,00 %                              |
| 70                                  | ThyssenKrupp Stål Danmark A/S, Kopenhagen, Dänemark                                      | DKK     | 800                                                | 100,00                 | 73                                                   |
| 71                                  | ThyssenKrupp Steel (Asia Pacific) Pte Ltd, Singapur, Singapur                            | SGD     | 500                                                | 100,00                 | 73                                                   |
| 72                                  | ThyssenKrupp Steel Japan Ltd., Tokio, Japan                                              | JPY     | 10.000                                             | 100,00                 | 73                                                   |
| 73                                  | ThyssenKrupp Veerhaven B.V., Rotterdam, Niederlande                                      |         | 5.000                                              | 100,00                 | 688                                                  |

<sup>1)</sup> Jahresabschluss nicht 30.09. <sup>2)</sup> nach IFRS Vorschriften einbezogen <sup>3)</sup> Splitteranteil ab der 4. Kommastelle <sup>4)</sup> Konzernmutter



## VOLL KONSOLIDIERTE TOCHTERUNTERNEHMEN (Stand 30. September 2010)

| Laufende Nummer                                      | Name und Sitz                                                              | Währung | Gesellschafts-kapital in 1.000 € bzw. Fremdwährung | Anteil am Kapital in % | gehalten über laufende Nummer |
|------------------------------------------------------|----------------------------------------------------------------------------|---------|----------------------------------------------------|------------------------|-------------------------------|
| <b>STEEL AMERICAS</b>                                |                                                                            |         |                                                    |                        |                               |
| <b>CSA</b>                                           |                                                                            |         |                                                    |                        |                               |
| 74                                                   | AirSteel Comercial Gases Industriais Ltda., Rio de Janeiro, Brasilien      | BRL     | 100                                                | 0,00 <sup>2)</sup>     | 4                             |
| 75                                                   | ThyssenKrupp CSA Siderúrgica do Atlântico Ltda., Rio de Janeiro, Brasilien | BRL     | 14.118.678                                         | 73,13                  | 80                            |
| 76                                                   | White Martins Steel Gases Industriais Ltda., Rio de Janeiro, Brasilien     | BRL     | 100                                                | 0,00 <sup>2)</sup>     | 4                             |
| <b>ThyssenKrupp Steel USA</b>                        |                                                                            |         |                                                    |                        |                               |
| 77                                                   | ThyssenKrupp Steel Americas, LLC, Wilmington/Delaware, USA                 | USD     | 1                                                  | 100,00                 | 691                           |
| 78                                                   | ThyssenKrupp Steel and Stainless USA, LLC, Wilmington/Delaware, USA        | USD     | 1.000                                              | 100,00                 | 77                            |
| 79                                                   | ThyssenKrupp Steel USA, LLC, Wilmington/Delaware, USA                      | USD     | 1.000                                              | 100,00                 | 78                            |
| <b>Other Companies Steel Americas</b>                |                                                                            |         |                                                    |                        |                               |
| 80                                                   | ThyssenKrupp Slab International B.V., Brielle, Niederlande                 |         | 80                                                 | 73,13                  | 73                            |
| <b>STAINLESS GLOBAL</b>                              |                                                                            |         |                                                    |                        |                               |
| <b>ThyssenKrupp Stainless Sonstige Beteiligungen</b> |                                                                            |         |                                                    |                        |                               |
| 81                                                   | ThyssenKrupp Nirosta GmbH, Krefeld                                         |         | 110.000                                            | 99,61                  | 648                           |
| <b>ThyssenKrupp Nirosta</b>                          |                                                                            |         |                                                    |                        |                               |
| 82                                                   | EBOR Edelstahl GmbH, Sachsenheim                                           |         | 511                                                | 100,00                 | 81                            |
| 83                                                   | smbChromstahl GmbH, Hannover-Langenhagen                                   |         | 277                                                | 100,00                 | 81                            |
| 84                                                   | ThyssenKrupp Nirosta Präzisionsband GmbH, Krefeld                          |         | 1.000                                              | 100,00                 | 81                            |
| 85                                                   | ThyssenKrupp Nirosta North America, Inc., Wilmington/Delaware, USA         | USD     | 2.000                                              | 100,00                 | 691                           |
| <b>ThyssenKrupp Acciai Speciali Terni (I)</b>        |                                                                            |         |                                                    |                        |                               |
| 86                                                   | Aspasel S.r.l., Rom, Italien                                               |         | 260                                                | 100,00                 | 89                            |
| 87                                                   | Società delle Fucine S.r.l., Terni, Italien                                |         | 7.988                                              | 100,00                 | 89                            |
| 88                                                   | Terninox S.p.A., Terni, Italien                                            |         | 20.800                                             | 100,00                 | 89                            |
| 89                                                   | ThyssenKrupp Acciai Speciali Terni S.p.A., Terni, Italien                  |         | 159.682                                            | 100,00                 | 686                           |
| 90                                                   | ThyssenKrupp AST USA, Inc., Albany/New York, USA                           | USD     | 30                                                 | 100,00                 | 691                           |
| 91                                                   | Tubificio di Terni S.p.A., Terni, Italien                                  |         | 5.944                                              | 97,00                  | 89                            |
| <b>ThyssenKrupp Mexinox (MX)</b>                     |                                                                            |         |                                                    |                        |                               |
| 92                                                   | Mexinox Trading S.A. de C.V., Mexico D.F., Mexico                          | MXN     | 100.600 <sup>1)</sup>                              | 100,00                 | 95 100,00 % <sup>3)</sup>     |
|                                                      |                                                                            |         |                                                    |                        | 93 0,00 % <sup>3)</sup>       |
| 93                                                   | Mexinox USA Inc., Brownsville/Texas, USA                                   | USD     | 2.000                                              | 100,00                 | 95                            |
| 94                                                   | ThyssenKrupp Mexinox CreatelT, S.A. de C.V., San Luis Potosi, Mexico       | MXN     | 50 <sup>1)</sup>                                   | 100,00                 | 95 99,98 %                    |
|                                                      |                                                                            |         |                                                    |                        | 92 0,02 %                     |
| 95                                                   | ThyssenKrupp Mexinox S.A. de C.V., San Luis Potosi, Mexico                 | MXN     | 4.621.499 <sup>1)</sup>                            | 100,00                 | 688 100,00 % <sup>3)</sup>    |
|                                                      |                                                                            |         |                                                    |                        | 97 0,00 % <sup>3)</sup>       |
| <b>Shanghai Krupp Stainless (CHN)</b>                |                                                                            |         |                                                    |                        |                               |
| 96                                                   | Shanghai Krupp Stainless Co., Ltd., Pudong New Area / Shanghai, VR China   | CNY     | 2.618.815 <sup>1)</sup>                            | 60,00                  | 81                            |
| <b>ThyssenKrupp Stainless USA</b>                    |                                                                            |         |                                                    |                        |                               |
| 97                                                   | ThyssenKrupp Stainless USA, LLC, Wilmington/Delaware, USA                  | USD     | 1.000                                              | 100,00                 | 78                            |
| <b>ThyssenKrupp VDM</b>                              |                                                                            |         |                                                    |                        |                               |
| 98                                                   | ThyssenKrupp VDM GmbH, Werdohl                                             |         | 32.000                                             | 98,06                  | 81                            |
| 99                                                   | ThyssenKrupp VDM Australia Pty. Ltd., Mulgrave/Victoria, Australien        | AUD     | 2.000                                              | 100,00                 | 98                            |
| 100                                                  | ThyssenKrupp VDM Austria Gesellschaft m.b.H., Wien, Österreich             |         | 50                                                 | 100,00                 | 669                           |
| 101                                                  | ThyssenKrupp VDM Benelux B.V., Dordrecht, Niederlande                      |         | 51                                                 | 100,00                 | 688                           |
| 102                                                  | ThyssenKrupp VDM Canada Ltd., Markham/Ontario, Kanada                      | CAD     | 300                                                | 100,00                 | 98                            |
| 103                                                  | ThyssenKrupp VDM de Mexico S.A. de C.V., Naucalpan de Juarez, Mexico       | MXN     | 550                                                | 100,00                 | 98                            |
| 104                                                  | ThyssenKrupp VDM (GZ) Trading Co., Ltd., Guangzhou, VR China               |         | 470                                                | 100,00                 | 680                           |
| 105                                                  | ThyssenKrupp VDM Hongkong Ltd., Hongkong, VR China                         | HKD     | 10 <sup>1)</sup>                                   | 99,98                  | 98                            |
| 106                                                  | ThyssenKrupp VDM Italia S.r.l., Sesto San Giovanni, Italien                |         | 10                                                 | 100,00                 | 686                           |
| 107                                                  | ThyssenKrupp VDM Japan K.K., Tokio, Japan                                  | JPY     | 30.000                                             | 100,00                 | 98                            |

<sup>1)</sup> Jahresabschluss nicht 30.09. <sup>2)</sup> nach IFRS Vorschriften einbezogen <sup>3)</sup> Splitteranteil ab der 4. Kommastelle <sup>4)</sup> Konzernmutter



## VOLL KONSOLIDIERTE TOCHTERUNTERNEHMEN (Stand 30. September 2010)

| Laufende Nummer                             | Name und Sitz                                                               | Währung | Gesellschafts-kapital in 1.000 € bzw. Fremdwährung | Anteil am Kapital in % | gehalten über laufende Nummer |
|---------------------------------------------|-----------------------------------------------------------------------------|---------|----------------------------------------------------|------------------------|-------------------------------|
| 108                                         | ThyssenKrupp VDM Korea Co. Ltd., Seoul, South Korea                         | KRW     | 100.000                                            | 100,00                 | 98                            |
| 109                                         | ThyssenKrupp VDM S.A.S., Rueil-Malmaison, Frankreich                        |         | 120                                                | 100,00                 | 684                           |
| 110                                         | ThyssenKrupp VDM (Schweiz) AG, Basel, Schweiz                               | CHF     | 100                                                | 100,00                 | 98                            |
| 111                                         | ThyssenKrupp VDM UK Ltd., Claygate-Esher, Großbritannien                    | GBP     | 60                                                 | 100,00                 | 98                            |
| 112                                         | ThyssenKrupp VDM USA, Inc., Reno/Nevada, USA                                | USD     | 600                                                | 100,00                 | 691                           |
| <b>ThyssenKrupp Stainless International</b> |                                                                             |         |                                                    |                        |                               |
| 113                                         | ThyssenKrupp Stainless International GmbH, Krefeld                          |         | 26                                                 | 100,00                 | 81                            |
| 114                                         | ThyssenKrupp SILCO-INOX Szervizközpont Kft, Batonytereny, Ungarn            | HUF     | 765.980                                            | 100,00                 | 115                           |
| 115                                         | ThyssenKrupp Stainless Benelux B.V., Rotterdam, Niederlande                 |         | 18.151                                             | 100,00                 | 688                           |
| 116                                         | ThyssenKrupp Stainless DVP, S.A., Barcelona, Spanien                        |         | 5.344                                              | 100,00                 | 665                           |
| 117                                         | ThyssenKrupp Stainless France S.A., Paris, Frankreich                       |         | 4.864                                              | 100,00                 | 684                           |
| 118                                         | ThyssenKrupp Stainless (GZ) Trading Company Ltd., Guangzhou, VR China       | USD     | 75                                                 | 100,00                 | 680                           |
| 119                                         | ThyssenKrupp Stainless International (Guangzhou) Ltd., Guangzhou, VR China  | USD     | 9.500                                              | 100,00                 | 680                           |
| 120                                         | ThyssenKrupp Stainless International (HK) Ltd., Hongkong, VR China          | HKD     | 5 <sup>1)</sup>                                    | 100,00                 | 113                           |
| 121                                         | ThyssenKrupp Stainless Istanbul Çelik Servis Merkezi A.S., Istanbul, Türkei |         | 1.049                                              | 100,00                 | 115                           |
| 122                                         | ThyssenKrupp Stainless Polska Sp.z o.o., Dabrowa Gornicza, Polen            | PLN     | 33.499                                             | 100,00                 | 113                           |
| 123                                         | ThyssenKrupp Stainless UK Ltd., Birmingham, Großbritannien                  | GBP     | 100                                                | 100,00                 | 690                           |
| <b>MATERIALS SERVICES</b>                   |                                                                             |         |                                                    |                        |                               |
| <b>MetalsServices</b>                       |                                                                             |         |                                                    |                        |                               |
| 124                                         | Aloverzee Handelsgesellschaft mbH, Düsseldorf                               |         | 26                                                 | 100,00                 | 142                           |
| 125                                         | Dr. Mertens Edelstahlhandel GmbH, Offenbach                                 |         | 1.023                                              | 100,00                 | 142                           |
| 126                                         | Eisenmetall Handelsgesellschaft mbH, Gelsenkirchen                          |         | 26                                                 | 100,00                 | 142                           |
| 127                                         | Erich Weit GmbH, München                                                    |         | 356                                                | 100,00                 | 134                           |
| 128                                         | Freiburger Stahlhandel GmbH, Freiburg i.Br.                                 |         | 2.200                                              | 51,00                  | 142                           |
| 129                                         | Health Care Solutions GmbH, Düsseldorf                                      |         | 4.173                                              | 100,00                 | 142                           |
| 130                                         | Herzog Coilex GmbH, Stuttgart                                               |         | 4.100                                              | 74,90                  | 147                           |
| 131                                         | Hövelmann & Co. Eisengroßhandlung GmbH, Gelsenkirchen                       |         | 256                                                | 100,00                 | 142                           |
| 132                                         | Jacob Bek GmbH, Ulm                                                         |         | 2.807                                              | 79,96                  | 142                           |
| 133                                         | Max Coehius GmbH, Berlin                                                    |         | 920                                                | 75,00                  | 142                           |
| 134                                         | Otto Wolff Handelsgesellschaft mbH, Düsseldorf                              |         | 15.400                                             | 99,50                  | 142                           |
| 135                                         | Peiniger International GmbH, Gelsenkirchen                                  |         | 1.023                                              | 100,00                 | 148                           |
| 136                                         | Thyssen Altwert Umweltservice GmbH, Düsseldorf                              |         | 6.740                                              | 100,00                 | 653                           |
| 137                                         | Thyssen Rheinstahl Technik GmbH, Düsseldorf                                 |         | 8.948                                              | 100,00                 | 142                           |
| 138                                         | Thyssen Schulte Werkstoffhandel GmbH, Düsseldorf                            |         | 10.226                                             | 100,00                 | 142                           |
| 139                                         | ThyssenKrupp Facilities Services GmbH, Düsseldorf                           |         | 1.816                                              | 100,00                 | 142                           |
|                                             |                                                                             |         |                                                    |                        | 651 5,10 %                    |
| 140                                         | ThyssenKrupp Information Services GmbH, Düsseldorf                          |         | 41.600                                             | 100,00                 | 648                           |
| 141                                         | ThyssenKrupp Mannex GmbH, Düsseldorf                                        |         | 10.100                                             | 100,00                 | 142                           |
| 142                                         | ThyssenKrupp Materials International GmbH, Düsseldorf                       |         | 283.383                                            | 99,84                  | 651                           |
| 143                                         | ThyssenKrupp MetalServ GmbH, Düsseldorf                                     |         | 1.534                                              | 100,00                 | 142                           |
|                                             |                                                                             |         |                                                    |                        | 651 6,00 %                    |
| 144                                         | ThyssenKrupp Schulte GmbH, Düsseldorf                                       |         | 26                                                 | 100,00                 | 142                           |
| 145                                         | ThyssenKrupp Services Immobilien GmbH, Düsseldorf                           |         | 50                                                 | 100,00                 | 142                           |
| 146                                         | ThyssenKrupp Stahlkontor GmbH, Düsseldorf                                   |         | 1.486                                              | 99,98                  | 142                           |
|                                             |                                                                             |         |                                                    |                        | 262 19,90 %                   |
|                                             |                                                                             |         |                                                    |                        | 648 2,38 %                    |
| 147                                         | ThyssenKrupp Stahl-Service-Center GmbH, Krefeld                             |         | 9.287                                              | 99,55                  | 142                           |
|                                             |                                                                             |         |                                                    |                        | 651 4,66 %                    |
| 148                                         | ThyssenKrupp Systems & Services GmbH, Düsseldorf                            |         | 59.310                                             | 100,00                 | 142                           |
|                                             |                                                                             |         |                                                    |                        | 651 5,10 %                    |

<sup>1)</sup> Jahresabschluss nicht 30.09. <sup>2)</sup> nach IFRS Vorschriften einbezogen <sup>3)</sup> Splitteranteil ab der 4. Kommastelle <sup>4)</sup> Konzernmutter



## VOLL KONSOLIDIERTE TOCHTERUNTERNEHMEN (Stand 30. September 2010)

| Laufende Nummer | Name und Sitz                                                                      | Währung | Gesellschafts-kapital in 1.000 € bzw. Fremdwährung | Anteil am Kapital in % | gehalten über laufende Nummer |
|-----------------|------------------------------------------------------------------------------------|---------|----------------------------------------------------|------------------------|-------------------------------|
| 149             | Vermögensverwaltungsgesellschaft KWT mbH, Grünwald                                 |         | 1.278                                              | 100,00                 | 139                           |
| 150             | Vermögensverwaltungsgesellschaft TIS mbH, Grünwald                                 |         | 513                                                | 100,00                 | 140                           |
| 151             | Vermögensverwaltungsgesellschaft Xtend mbH, Grünwald                               |         | 10.516                                             | 100,00                 | 142                           |
| 152             | Xtend new media Holding GmbH, Grünwald                                             |         | 100                                                | 100,00                 | 140                           |
| 153             | B.V. 'Nedeximpo' Nederlandse Export- en Importmaatschappij, Amsterdam, Niederlande |         | 1.362                                              | 100,00                 | 190                           |
| 154             | Carolina Building Materials, Inc., Carolina, Puerto Rico                           | USD     | 450                                                | 100,00                 | 134                           |
| 155             | Cimex-Nor S.A., San Sebastian, Spanien                                             |         | 618                                                | 74,00                  | 142                           |
| 156             | FERROGLAS Glasbautechnik GmbH, Hörsching, Österreich                               |         | 218                                                | 100,00                 | 669                           |
| 157             | LAGERMEX S.A. de C.V., Puebla, Mexico                                              | MXN     | 120.545                                            | 100,00                 | 142                           |
|                 |                                                                                    |         |                                                    |                        | 71,95 %                       |
|                 |                                                                                    |         |                                                    |                        | 4                             |
|                 |                                                                                    |         |                                                    |                        | 28,05 %                       |
| 158             | LAMINCER S.A., Munguia, Spanien                                                    |         | 180 <sup>1)</sup>                                  | 100,00                 | 142                           |
|                 |                                                                                    |         |                                                    |                        | 60,00 %                       |
|                 |                                                                                    |         |                                                    |                        | 155                           |
|                 |                                                                                    |         |                                                    |                        | 40,00 %                       |
| 159             | OOO ThyssenKrupp Materials, Moskau, Russland                                       | RUB     | 928.369                                            | 96,03                  | 142                           |
| 160             | PALMETAL Controlo e Armazenagem S.A., Palmela, Portugal                            |         | 1.000                                              | 90,00                  | 155                           |
| 161             | Sidcomex S.A. de C.V., Puebla, Mexico                                              | MXN     | 50 <sup>1)</sup>                                   | 100,00                 | 157                           |
|                 |                                                                                    |         |                                                    |                        | 99,99 %                       |
|                 |                                                                                    |         |                                                    |                        | 142                           |
|                 |                                                                                    |         |                                                    |                        | 0,01 %                        |
| 162             | Techno-Stahl Stahlgroßhandel und Brennschneidbetrieb Ges.m.b.H., Wien, Österreich  |         | 146 <sup>1)</sup>                                  | 100,00                 | 669                           |
| 163             | Thyssen Financial Services B.V., 's-Gravendeel, Niederlande                        |         | 3.857                                              | 100,00                 | 262                           |
| 164             | Thyssen Sudamerica N.V., Willemstad, Niederländische Antillen                      | USD     | 5.463                                              | 100,00                 | 190                           |
| 165             | Thyssen Trading S.A., São Paulo, Brasilien                                         | BRL     | 19.738 <sup>1)</sup>                               | 100,00                 | 142                           |
| 166             | ThyssenKrupp Christon N.V., Lokeren, Belgien                                       |         | 7.033                                              | 100,00                 | 688                           |
|                 |                                                                                    |         |                                                    |                        | 53,50 %                       |
|                 |                                                                                    |         |                                                    |                        | 138                           |
|                 |                                                                                    |         |                                                    |                        | 46,50 %                       |
| 167             | ThyssenKrupp Energostal S.A., Torun, Polen                                         | PLN     | 15.000                                             | 84,00                  | 142                           |
| 168             | ThyssenKrupp Ferostav, spol. s r.o., Nové Zámky, Slowakische Republik              |         | 1.492                                              | 80,00                  | 142                           |
| 169             | ThyssenKrupp Ferroglobus Kereskedelmi ZRt, Budapest, Ungarn                        | HUF     | 3.244.000                                          | 100,00                 | 142                           |
| 170             | ThyssenKrupp Ferrosta spol. s.r.o., Prag, Tschechische Republik                    | CZK     | 200                                                | 100,00                 | 142                           |
| 171             | ThyssenKrupp Fortinox S.A., Buenos Aires, Argentinien                              | USD     | 2.100                                              | 80,00                  | 142                           |
| 172             | ThyssenKrupp Industrial Services Canada, Inc., Windsor/Ontario, Kanada             | CAD     | 0                                                  | 100,00                 | 679                           |
| 173             | ThyssenKrupp Industrial Services NA, Inc., Southfield/Michigan, USA                | USD     | 25                                                 | 100,00                 | 189                           |
| 174             | ThyssenKrupp ISIS Holding, Inc., Wilmington/Delaware, USA                          | USD     | 1                                                  | 100,00                 | 189                           |
| 175             | ThyssenKrupp Logistics, Inc., Wilmington/Delaware, USA                             | USD     | 1                                                  | 100,00                 | 189                           |
| 176             | ThyssenKrupp Mannex Asia Pte. Ltd., Singapur, Singapur                             | USD     | 154                                                | 100,00                 | 141                           |
| 177             | ThyssenKrupp Mannex Pty. Ltd., Sydney/New South Wales, Australien                  | AUD     | 213                                                | 100,00                 | 142                           |
| 178             | ThyssenKrupp Mannex Sverige AB, Göteborg, Schweden                                 | SEK     | 2.000                                              | 100,00                 | 141                           |
| 179             | ThyssenKrupp Mannex UK Ltd., Woking, Großbritannien                                | GBP     | 2.175                                              | 100,00                 | 690                           |
| 180             | ThyssenKrupp Materials Austria GmbH, Wien, Österreich                              |         | 2.455                                              | 100,00                 | 669                           |
| 181             | ThyssenKrupp Materials Belgium N.V./S.A., Lokeren, Belgien                         |         | 1.200                                              | 100,00                 | 688                           |
|                 |                                                                                    |         |                                                    |                        | 85,87 %                       |
|                 |                                                                                    |         |                                                    |                        | 138                           |
|                 |                                                                                    |         |                                                    |                        | 14,13 %                       |
| 182             | ThyssenKrupp Materials CA Ltd., Concord/Ontario, Kanada                            | CAD     | 14.778                                             | 100,00                 | 189                           |
| 183             | ThyssenKrupp Materials d.o.o., Belgrad, Serbien                                    |         | 9.990                                              | 100,00                 | 142                           |
| 184             | ThyssenKrupp Materials France S.A.S., Maurepas, Frankreich                         |         | 25.958                                             | 100,00                 | 684                           |
| 185             | ThyssenKrupp Materials Holding (Thailand) Ltd., Samut Prakarn Province, Thailand   | THB     | 46.900                                             | 100,00                 | 195                           |
|                 |                                                                                    |         |                                                    |                        | 51,00 %                       |
|                 |                                                                                    |         |                                                    |                        | 142                           |
|                 |                                                                                    |         |                                                    |                        | 49,00 %                       |
| 186             | ThyssenKrupp Materials Ibérica S.A., Martorelles, Spanien                          |         | 7.681                                              | 100,00                 | 665                           |
| 187             | ThyssenKrupp Materials Korea Company Ltd., Seoul, South Korea                      | KRW     | 4.000.000                                          | 60,00                  | 142                           |
| 188             | ThyssenKrupp Materials Middle East FZE, Jebel Ali, Vereinigte Arabische Emirate    | AED     | 3.000                                              | 100,00                 | 142                           |
| 189             | ThyssenKrupp Materials NA, Inc., Southfield/Michigan, USA                          | USD     | 2                                                  | 100,00                 | 691                           |
| 190             | ThyssenKrupp Materials Nederland B.V., Amsterdam, Niederlande                      |         | 9.076                                              | 100,00                 | 688                           |
| 191             | ThyssenKrupp Materials Romania S.R.L., Bukarest, Rumänien                          | RON     | 21.552 <sup>1)</sup>                               | 100,00                 | 142                           |

<sup>1)</sup> Jahresabschluss nicht 30.09. <sup>2)</sup> nach IFRS Vorschriften einbezogen <sup>3)</sup> Splitteranteil ab der 4. Kommastelle <sup>4)</sup> Konzernmutter



## VOLL KONSOLIDIERTE TOCHTERUNTERNEHMEN (Stand 30. September 2010)

| Laufende Nummer        | Name und Sitz                                                                        | Währung | Gesellschafts-kapital in 1.000 € bzw. Fremdwährung | Anteil am Kapital in % | gehalten über laufende Nummer |
|------------------------|--------------------------------------------------------------------------------------|---------|----------------------------------------------------|------------------------|-------------------------------|
| 192                    | ThyssenKrupp Materials Schweiz AG, Bronschhofen, Schweiz                             | CHF     | 4.600                                              | 100,00                 | 142                           |
| 193                    | ThyssenKrupp Materials (Shanghai) Co., Ltd., Shanghai, VR China                      | CNY     | 23.000 <sup>1)</sup>                               | 70,00                  | 142                           |
| 194                    | ThyssenKrupp Materials Sverige AB, Göteborg, Schweden                                | SEK     | 23.080                                             | 100,00                 | 142                           |
| 195                    | ThyssenKrupp Materials (Thailand) Co., Ltd., Bangkok, Thailand                       | THB     | 200.000                                            | 83,50                  | 142                           |
|                        |                                                                                      |         |                                                    |                        | 185 34,50 %                   |
| 196                    | ThyssenKrupp Materials (UK) Ltd., Smethwick, Großbritannien                          | GBP     | 12.032                                             | 100,00                 | 690                           |
| 197                    | ThyssenKrupp Materials Vietnam LLC, Hanoi, Vietnam                                   | VND     | 121.000.000                                        | 97,36                  | 142                           |
| 198                    | ThyssenKrupp OnlineMetals, LLC, Southfield/Michigan, USA                             | USD     | 1.600                                              | 100,00                 | 189                           |
| 199                    | ThyssenKrupp Portugal - Aços e Serviços, Lda., Carregado, Portugal                   |         | 1.150                                              | 100,00                 | 142                           |
| 200                    | ThyssenKrupp Securitization Corp., Southfield/Michigan, USA                          | USD     | 0                                                  | 100,00                 | 691                           |
| 201                    | ThyssenKrupp Service Acier S.A.S., Fosses, Frankreich                                |         | 14.000                                             | 100,00                 | 684                           |
| 202                    | ThyssenKrupp Stahlunion Polska Sp. z o.o., Katowitz, Polen                           | PLN     | 100                                                | 100,00                 | 134                           |
| 203                    | ThyssenKrupp Stal Serwis Polska Sp. z o.o., Dabrowa Górnicza, Polen                  | PLN     | 28.000                                             | 100,00                 | 147                           |
| 204                    | ThyssenKrupp Steel Distribution, LLC, Wilmington/Delaware, USA                       | USD     | 1                                                  | 100,00                 | 205                           |
| 205                    | ThyssenKrupp Steel North America, Inc., Dover/Delaware, USA                          | USD     | 54.501                                             | 100,00                 | 691                           |
| 206                    | ThyssenKrupp-Jupiter Stomana OOD, Sofia, Bulgarien                                   | BGN     | 500                                                | 80,00                  | 142                           |
| <b>SpecialServices</b> |                                                                                      |         |                                                    |                        |                               |
| 207                    | DSU Beteiligungs-Gesellschaft für Dienstleistungen und Umwelttechnik mbH, Oberhausen |         | 30                                                 | 100,00                 | 217                           |
| 208                    | ThyssenKrupp Aerospace Germany GmbH, Rodgau, Nieder-Roden                            | DEM     | 1.000                                              | 100,00                 | 142                           |
| 209                    | ThyssenKrupp Anlagenservice GmbH, Oberhausen                                         |         | 4.536                                              | 100,00                 | 142                           |
|                        |                                                                                      |         |                                                    |                        | 648 5,29 %                    |
| 210                    | ThyssenKrupp AT.PRO tec GmbH, Essen                                                  |         | 42                                                 | 61,19                  | 218                           |
| 211                    | ThyssenKrupp Bauservice GmbH, Hückelhoven                                            |         | 2.557                                              | 100,00                 | 142                           |
|                        |                                                                                      |         |                                                    |                        | 651 5,10 %                    |
| 212                    | ThyssenKrupp Energievertriebs GmbH, Essen                                            |         | 5.113                                              | 100,00                 | 142                           |
| 213                    | ThyssenKrupp GfT Bautechnik GmbH, Essen                                              |         | 500                                                | 70,00                  | 142                           |
| 214                    | ThyssenKrupp GfT Gleistechnik GmbH, Essen                                            |         | 1.000                                              | 100,00                 | 142                           |
| 215                    | ThyssenKrupp GfT Tiefbautechnik GmbH, Essen                                          |         | 26                                                 | 100,00                 | 213                           |
| 216                    | ThyssenKrupp Metallurgie GmbH, Essen                                                 |         | 7.107                                              | 100,00                 | 142                           |
|                        |                                                                                      |         |                                                    |                        | 262 35,14 %                   |
| 217                    | ThyssenKrupp MillServices & Systems GmbH, Duisburg                                   |         | 1.875                                              | 68,00                  | 262                           |
| 218                    | ThyssenKrupp MinEnergy GmbH, Essen                                                   |         | 1.023                                              | 100,00                 | 142                           |
| 219                    | ThyssenKrupp Plastics GmbH, Düsseldorf                                               |         | 10.000                                             | 100,00                 | 220                           |
| 220                    | ThyssenKrupp Plastics International GmbH, Düsseldorf                                 |         | 5.113                                              | 100,00                 | 142                           |
| 221                    | Alfaplast AG, Steinhausen, Schweiz                                                   | CHF     | 250                                                | 100,00                 | 257                           |
| 222                    | Aviation Metals Ltd., Birmingham, Großbritannien                                     | GBP     | 65                                                 | 40,00                  | 244                           |
| 223                    | DSU - Romania S.r.l., Bukarest, Rumänien                                             | RON     | 6.968                                              | 100,00                 | 207                           |
| 224                    | Indu-Light AG, Beromünster/Luzern, Schweiz                                           | CHF     | 150                                                | 53,33                  | 226                           |
| 225                    | Interlux GmbH, Hörsching, Österreich                                                 |         | 182                                                | 100,00                 | 234                           |
| 226                    | Neomat AG, Beromünster/Luzern, Schweiz                                               | CHF     | 200                                                | 100,00                 | 257                           |
| 227                    | Nordisk Plast A/S, Auning, Dänemark                                                  | DKK     | 4.000                                              | 100,00                 | 230                           |
| 228                    | Notz Plastics AG, Biel/Bienne, Schweiz                                               | CHF     | 1.000                                              | 100,00                 | 257                           |
| 229                    | OOO ThyssenKrupp Bautechnik technischer Service, St. Petersburg, Russland            | RUB     | 360 <sup>1)</sup>                                  | 100,00                 | 213                           |
| 230                    | RIAS A/S, Roskilde, Dänemark                                                         | DKK     | 23.063                                             | 54,15                  | 220                           |
| 231                    | RIP Comércio Ltda., São Paulo, Brasilien                                             | BRL     | 619                                                | 100,00                 | 232                           |
| 232                    | RIP Serviços Industriais Ltda., São Paulo, Brasilien                                 | BRL     | 180.562                                            | 100,00                 | 142                           |
| 233                    | RIP Serviços Siderúrgicos Ltda., Rio de Janeiro, Brasilien                           | BRL     | 1.000                                              | 100,00                 | 232                           |
|                        |                                                                                      |         |                                                    |                        | 100,00 % <sup>3)</sup>        |
|                        |                                                                                      |         |                                                    |                        | 231 0,00 % <sup>3)</sup>      |

<sup>1)</sup> Jahresabschluss nicht 30.09. <sup>2)</sup> nach IFRS Vorschriften einbezogen <sup>3)</sup> Splitteranteil ab der 4. Kommastelle <sup>4)</sup> Konzernmutter



## VOLL KONSOLIDIERTE TOCHTERUNTERNEHMEN (Stand 30. September 2010)

| Laufende Nummer           | Name und Sitz                                                                          | Währung | Gesellschafts-kapital in 1.000 € bzw. Fremdwährung | Anteil am Kapital in % | gehalten über laufende Nummer |
|---------------------------|----------------------------------------------------------------------------------------|---------|----------------------------------------------------|------------------------|-------------------------------|
| 234                       | Röhm Austria GmbH, Wien, Österreich                                                    |         | 727                                                | 100,00                 | 669                           |
| 235                       | Röhm Italia S.r.l., Garbagnate Milanese, Italien                                       |         | 100                                                | 100,00                 | 686                           |
| 236                       | Steba AG, Pfäffikon, Schweiz                                                           | CHF     | 500                                                | 100,00                 | 226                           |
| 237                       | STEBA Direktverkauf Kunststoffe + Plexiglas GmbH, Hunzenschwil, Schweiz                | CHF     | 20                                                 | 100,00                 | 236                           |
| 238                       | ThyssenKrupp Aerospace Australia Pty. Ltd., Wetherill Park/New South Wales, Australien | AUD     | 2.549                                              | 100,00                 | 241                           |
| 239                       | ThyssenKrupp Aerospace Finland Oy, Mänttä, Finnland                                    |         | 59                                                 | 100,00                 | 241                           |
| 240                       | ThyssenKrupp Aerospace India Private Ltd., Bangalore, Indien                           | INR     | 100                                                | 100,00                 | 241 99,99 %                   |
|                           |                                                                                        |         |                                                    |                        | 244 0,01 %                    |
| 241                       | ThyssenKrupp Aerospace International Holdings Ltd., Birmingham, Großbritannien         | GBP     | 650                                                | 100,00                 | 244                           |
| 242                       | ThyssenKrupp Aerospace Nederland B.V., Venlo, Niederlande                              |         | 18                                                 | 100,00                 | 688                           |
| 243                       | ThyssenKrupp Aerospace (Shanghai) Co. Ltd., Shanghai, VR China                         | USD     | 2.000                                              | 100,00                 | 244                           |
| 244                       | ThyssenKrupp Aerospace UK Ltd., Birmingham, Großbritannien                             | GBP     | 3.295                                              | 100,00                 | 690                           |
| 245                       | ThyssenKrupp Autômatas Indústria de Peças Ltda., São Paulo, Brasilien                  | BRL     | 335                                                | 80,00                  | 232                           |
| 246                       | ThyssenKrupp Cadillac Plastic S.A.S., Mitry-Mory, Frankreich                           |         | 1.053                                              | 100,00                 | 684                           |
| 247                       | ThyssenKrupp Comércio de Combustíveis e Gases Ltda., Rio de Janeiro, Brasilien         | BRL     | 100.230                                            | 100,00                 | 218 95,00 %                   |
|                           |                                                                                        |         |                                                    |                        | 75 5,00 %                     |
| 248                       | ThyssenKrupp GfT Polska Sp. z o.o., Krakau, Polen                                      | PLN     | 15.750                                             | 100,00                 | 214                           |
| 249                       | ThyssenKrupp InPlant Services LLC, Dover/Delaware, USA                                 | USD     | 1.900                                              | 51,00                  | 189                           |
| 250                       | ThyssenKrupp Máquinas e Equipamentos Ltda., Rio de Janeiro, Brasilien                  | BRL     | 10                                                 | 100,00                 | 232 95,00 %                   |
|                           |                                                                                        |         |                                                    |                        | 75 5,00 %                     |
| 251                       | ThyssenKrupp Materials, LLC, Southfield/Michigan, USA                                  | USD     | 1                                                  | 100,00                 | 189                           |
| 252                       | ThyssenKrupp MinEnergy (Tianjin) Co., Ltd., Tianjin, VR China                          | USD     | 200 <sup>1)</sup>                                  | 100,00                 | 218                           |
| 253                       | ThyssenKrupp Otto Wolff N.V./S.A, Mechelen, Belgien                                    |         | 711                                                | 100,00                 | 220                           |
| 254                       | ThyssenKrupp Plastic Ibérica SL, Massalfassar (Valencia), Spanien                      |         | 3.000                                              | 100,00                 | 220                           |
| 255                       | ThyssenKrupp Steelcom N.Z. Ltd., Neuseeland                                            | NZD     | 0                                                  | 100,00                 | 213                           |
| 256                       | ThyssenKrupp Steelcom Pty. Ltd., North Sydney/New South Wales, Australien              | AUD     | 0                                                  | 100,00                 | 213                           |
| 257                       | ThyssenKrupp Stokvis Plastics B.V., Roosendaal, Niederlande                            |         | 4.500                                              | 100,00                 | 688                           |
| 258                       | ThyssenKrupp-Dopravné Stavby Slovensko s.r.o., Bratislava, Slowakische Republik        | SKK     | 1.000 <sup>1)</sup>                                | 51,00                  | 214                           |
| 259                       | TOO ThyssenKrupp-CL COO, Aktau, Kasachstan                                             | KZT     | 16.000 <sup>1)</sup>                               | 51,00                  | 213                           |
| 260                       | UAB ThyssenKrupp Baltija, Klaipeda, Litauen                                            | LTL     | 10 <sup>1)</sup>                                   | 51,00                  | 213                           |
| <b>IndustrialServices</b> |                                                                                        |         |                                                    |                        |                               |
| 261                       | Siegfried Schlüssler Feuerungsbau GmbH, Bispingen                                      |         | 135                                                | 100,00                 | 263                           |
| 262                       | ThyssenKrupp Industrial Services Holding GmbH, Düsseldorf                              |         | 50.000                                             | 100,00                 | 142 94,90 %                   |
|                           |                                                                                        |         |                                                    |                        | 648 5,10 %                    |
| 263                       | ThyssenKrupp Xervon Energy GmbH, Duisburg                                              |         | 1.300                                              | 100,00                 | 264                           |
| 264                       | ThyssenKrupp Xervon GmbH, Düsseldorf                                                   |         | 12.000                                             | 100,00                 | 148                           |
| 265                       | ThyssenKrupp Xervon Utilities GmbH, Düsseldorf                                         |         | 25                                                 | 100,00                 | 264                           |
| 266                       | Rosendaal Services N.V., Kapellen, Belgien                                             |         | 125                                                | 100,00                 | 264 98,40 %                   |
|                           |                                                                                        |         |                                                    |                        | 265 1,60 %                    |
| 267                       | Sumatec/Astel-Peiniger (M) Joint Venture, Selangor Darul Ehsan, Malaysia               | MYR     |                                                    | 56,00                  | 278                           |
| 268                       | ThyssenKrupp Palmers Ltd., West Midlands, Großbritannien                               | GBP     | 0                                                  | 100,00                 | 690                           |
| 269                       | ThyssenKrupp Services Ltd., Coventry, Großbritannien                                   | GBP     | 125                                                | 100,00                 | 270                           |
| 270                       | ThyssenKrupp Services (UK) Ltd., Business Park Coventry West Midlands, Großbritannien  | GBP     | 656                                                | 100,00                 | 690                           |
| 271                       | ThyssenKrupp Xervon Algerie S.A.R.L., Algier, Algerien                                 | DZD     | 23.750                                             | 100,00                 | 264 95,00 %                   |
|                           |                                                                                        |         |                                                    |                        | 276 5,00 %                    |
| 272                       | ThyssenKrupp Xervon Austria GmbH, Maria Lanzendorf, Österreich                         |         | 1.453                                              | 100,00                 | 669                           |
| 273                       | ThyssenKrupp Xervon Co. Ltd., Shanghai, VR China                                       | CNY     | 5.805 <sup>1)</sup>                                | 100,00                 | 264                           |
| 274                       | ThyssenKrupp Xervon Corp - Mindus Joint Venture, Kuala Lumpur, Malaysia                | MYR     | 0                                                  | 80,00                  | 275                           |

<sup>1)</sup> Jahresabschluss nicht 30.09. <sup>2)</sup> nach IFRS Vorschriften einbezogen <sup>3)</sup> Splitteranteil ab der 4. Kommastelle <sup>4)</sup> Konzernmutter



## VOLL KONSOLIDIERTE TOCHTERUNTERNEHMEN (Stand 30. September 2010)

| Laufende Nummer                               | Name und Sitz                                                                                        | Währung | Gesellschafts-kapital in 1.000 € bzw. Fremdwährung | Anteil am Kapital in % | gehalten über laufende Nummer |
|-----------------------------------------------|------------------------------------------------------------------------------------------------------|---------|----------------------------------------------------|------------------------|-------------------------------|
| 275                                           | ThyssenKrupp Xervon Corp. Sdn. Bhd., Kuala Lumpur, Malaysia                                          | MYR     | 3.800                                              | 49,00                  | 278                           |
| 276                                           | ThyssenKrupp Xervon Egypt SAE, Kairo, Ägypten                                                        | EGP     | 14.000                                             | 100,00                 | 277 98,96 %                   |
|                                               |                                                                                                      |         |                                                    |                        | 264 1,04 %                    |
| 277                                           | ThyssenKrupp Xervon Gulf LLC, Sharjah, Vereinigte Arabische Emirate                                  | AED     | 500                                                | 100,00                 | 264                           |
| 278                                           | ThyssenKrupp Xervon Malaysia Sdn. Bhd., Kuala Lumpur, Malaysia                                       | MYR     | 2.650 <sup>1)</sup>                                | 100,00                 | 264                           |
| 279                                           | ThyssenKrupp Xervon Norway AS, Oslo, Norwegen                                                        | NOK     | 20.000                                             | 100,00                 | 264                           |
| 280                                           | ThyssenKrupp Xervon Polska Sp. z o.o., Warschau, Polen                                               | PLN     | 7.150                                              | 100,00                 | 264                           |
| 281                                           | ThyssenKrupp Xervon S.A., Taragona, Spanien                                                          |         | 598                                                | 100,00                 | 665                           |
| 282                                           | ThyssenKrupp Xervon Saudi Arabia L.L.C., Al-Khubar, Saudi Arabien                                    | SAR     | 1.000                                              | 100,00                 | 277                           |
| 283                                           | ThyssenKrupp Xervon Sweden AB, Stockholm, Schweden                                                   | SEK     | 1.200                                              | 100,00                 | 148                           |
| 284                                           | ThyssenKrupp Xervon U.A.E. - L.L.C. For Industrial Services, Abu Dhabi, Vereinigte Arabische Emirate | AED     | 2.000                                              | 100,00                 | 277                           |
| <b>ELEVATOR TECHNOLOGY</b>                    |                                                                                                      |         |                                                    |                        |                               |
| <b>Corporate Elevator</b>                     |                                                                                                      |         |                                                    |                        |                               |
| 285                                           | ELEG Europäische Lift + Escalator GmbH, Düsseldorf                                                   |         | 51                                                 | 100,00                 | 287                           |
| 286                                           | Rheinstahl Union GmbH, Düsseldorf                                                                    |         | 26                                                 | 100,00                 | 287                           |
| 287                                           | ThyssenKrupp Elevator AG, Düsseldorf                                                                 |         | 100.000                                            | 100,00                 | 651                           |
| 288                                           | ThyssenKrupp Elevator die Fünfte GmbH, Essen                                                         |         | 25                                                 | 100,00                 | 287                           |
| 289                                           | ThyssenKrupp Elevator Research GmbH, Düsseldorf                                                      |         | 25                                                 | 100,00                 | 285                           |
| 290                                           | ThyssenKrupp Industries and Services Qatar LLC, Doha, Katar                                          | QAR     | 2.000                                              | 100,00                 | 287                           |
| <b>Central/Eastern/Northern Europe (CENE)</b> |                                                                                                      |         |                                                    |                        |                               |
| 291                                           | Christian Hein GmbH, Langenhagen                                                                     |         | 522                                                | 100,00                 | 301                           |
| 292                                           | GMT Aufzug-Service GmbH, Ettlingen                                                                   |         | 26                                                 | 100,00                 | 301                           |
| 293                                           | GWH Aufzüge GmbH, Himmelstadt                                                                        |         | 26                                                 | 100,00                 | 301                           |
| 294                                           | Haisch Aufzüge GmbH, Gingen/Fils                                                                     |         | 50                                                 | 100,00                 | 301                           |
| 295                                           | Hanseatische Aufzugsbau GmbH, Rostock                                                                |         | 33                                                 | 100,00                 | 301                           |
| 296                                           | LiftEquip GmbH Elevator Components, Neuhausen a.d.F.                                                 |         | 25                                                 | 100,00                 | 301                           |
| 297                                           | Liftservice und Montage GmbH, Saarbrücken                                                            |         | 51                                                 | 100,00                 | 301                           |
| 298                                           | Tepper Aufzüge GmbH, Münster                                                                         |         | 1.641                                              | 100,00                 | 301                           |
| 299                                           | ThyssenKrupp Aufzüge GmbH, Stuttgart                                                                 |         | 2.700                                              | 100,00                 | 302                           |
| 300                                           | ThyssenKrupp Aufzugswerke GmbH, Neuhausen a.d.F.                                                     |         | 10.226                                             | 99,50                  | 301                           |
| 301                                           | ThyssenKrupp Elevator (CENE) GmbH, Essen                                                             |         | 7.100                                              | 100,00                 | 287                           |
| 302                                           | ThyssenKrupp Elevator (CENE) Infrastruktur GmbH, Essen                                               |         | 2.700                                              | 100,00                 | 301                           |
| 303                                           | Ascenseurs Drieux-Combaluzier S.A.S., Les Lilas, Frankreich                                          |         | 892                                                | 100,00                 | 315                           |
| 304                                           | Atena S.A., Les Lilas, Frankreich                                                                    |         | 40                                                 | 100,00                 | 315                           |
| 305                                           | Bardeck Lift Engineers Ltd., London, Großbritannien                                                  | GBP     | 11                                                 | 100,00                 | 690                           |
| 306                                           | Compagnie des Ascenseurs et Elevateurs S.A.M. 'CASEL SAM', Monaco, Monaco                            |         | 153                                                | 98,80                  | 315                           |
| 307                                           | Hammond & Champness Ltd., Nottingham, Großbritannien                                                 | GBP     | 500                                                | 100,00                 | 318                           |
| 308                                           | HK Services A/S, Bergen, Norwegen                                                                    | NOK     | 351                                                | 100,00                 | 319                           |
| 309                                           | MGTI SNEV S.A.S., Saint Jeannet, Frankreich                                                          |         | 526                                                | 100,00                 | 315                           |
| 310                                           | Mulder Liftservice B.V., Nuth, Niederlande                                                           |         | 18                                                 | 100,00                 | 324                           |
| 311                                           | OOO ThyssenKrupp Elevator, Moskau, Russland                                                          | RUB     | 14.344                                             | 100,00                 | 301                           |
| 312                                           | Proxi-Line E.U.R.L., Angers, Frankreich                                                              |         | 77                                                 | 100,00                 | 326                           |
| 313                                           | The Britannic Lift Company Ltd., West Yorkshire, Großbritannien                                      | GBP     | 35                                                 | 100,00                 | 318                           |
| 314                                           | ThyssenKrupp Ascenseurs Luxembourg S.a.r.l., Luxemburg, Luxemburg                                    |         | 13.396                                             | 100,00                 | 301                           |
| 315                                           | ThyssenKrupp Ascenseurs S.A.S., Angers, Frankreich                                                   |         | 8.117                                              | 100,00                 | 326                           |
| 316                                           | ThyssenKrupp Aufzüge AG, Rümlang, Schweiz                                                            | CHF     | 1.165                                              | 100,00                 | 301 85,84 %                   |
|                                               |                                                                                                      |         |                                                    |                        | 315 14,16 %                   |

<sup>1)</sup> Jahresabschluss nicht 30.09. <sup>2)</sup> nach IFRS Vorschriften einbezogen <sup>3)</sup> Splitteranteil ab der 4. Kommastelle <sup>4)</sup> Konzernmutter



## VOLL KONSOLIDIERTE TOCHTERUNTERNEHMEN (Stand 30. September 2010)

| Laufende Nummer                                   | Name und Sitz                                                           | Währung | Gesellschafts-kapital in 1.000 € bzw. Fremdwährung | Anteil am Kapital in % | gehalten über laufende Nummer |
|---------------------------------------------------|-------------------------------------------------------------------------|---------|----------------------------------------------------|------------------------|-------------------------------|
| 317                                               | ThyssenKrupp Aufzüge Gesellschaft m.b.H., Wien, Österreich              |         | 370                                                | 100,00                 | 669                           |
| 318                                               | ThyssenKrupp Aufzüge Ltd., Nottingham, Großbritannien                   | GBP     | 20.990                                             | 100,00                 | 690                           |
| 319                                               | ThyssenKrupp Aufzüge Norge A/S, Oslo, Norwegen                          | NOK     | 5.200                                              | 100,00                 | 301                           |
| 320                                               | ThyssenKrupp Aufzugswerke Konstruktions GmbH, Gratkorn, Österreich      |         | 35                                                 | 100,00                 | 669 60,00 %                   |
|                                                   |                                                                         |         |                                                    |                        | 300 40,00 %                   |
| 321                                               | ThyssenKrupp DVG dvgala d.o.o., Trzin, Slowenien                        |         | 805                                                | 100,00                 | 669                           |
| 322                                               | ThyssenKrupp Elevator A/S, Glostrup, Dänemark                           | DKK     | 550                                                | 100,00                 | 301                           |
| 323                                               | ThyssenKrupp Elevator A/S, Oslo, Norwegen                               | NOK     | 100                                                | 100,00                 | 319                           |
| 324                                               | ThyssenKrupp Elevator B.V., Krimpen aan den IJssel, Niederlande         |         | 4.977                                              | 100,00                 | 688                           |
| 325                                               | ThyssenKrupp Elevator Finland Oy, Helsinki, Finnland                    |         | 42                                                 | 100,00                 | 301                           |
| 326                                               | ThyssenKrupp Elevator Holding France S.A.S., Puteaux Cedex, Frankreich  |         | 34.433                                             | 100,00                 | 684                           |
| 327                                               | ThyssenKrupp Elevator Ireland, Ltd., Dublin, Irland                     |         | 63                                                 | 100,00                 | 318                           |
| 328                                               | ThyssenKrupp Elevator Lithuania UAB, Vilnius, Litauen                   | LTL     | 691 <sup>1)</sup>                                  | 100,00                 | 669                           |
| 329                                               | ThyssenKrupp Elevator Manufacturing France S.A.S., Angers, Frankreich   |         | 4.602                                              | 100,00                 | 315                           |
| 330                                               | ThyssenKrupp Elevator Sp. z o.o., Warschau, Polen                       | PLN     | 15.300                                             | 100,00                 | 301                           |
| 331                                               | ThyssenKrupp Elevator Sverige AB, Stockholm, Schweden                   | SEK     | 8.542                                              | 100,00                 | 301                           |
| 332                                               | ThyssenKrupp Elevator UK Ltd., Nottingham, Großbritannien               | GBP     | 2.300                                              | 100,00                 | 318                           |
| 333                                               | ThyssenKrupp Kazlift LLP, Almaty, Kasachstan                            | KZT     | 166.076                                            | 100,00                 | 366                           |
| 334                                               | ThyssenKrupp Koncar dizala d.o.o., Zagreb, Kroatien                     | HRK     | 17.204                                             | 100,00                 | 301                           |
| 335                                               | ThyssenKrupp Lift Kft, Budapest, Ungarn                                 | HUF     | 101.480                                            | 100,00                 | 317 99,90 %                   |
|                                                   |                                                                         |         |                                                    |                        | 285 0,10 %                    |
| 336                                               | ThyssenKrupp Liften Ascenseurs S.A., Brüssel, Belgien                   |         | 2.480                                              | 100,00                 | 301 100,00 % <sup>3)</sup>    |
|                                                   |                                                                         |         |                                                    |                        | 440 0,00 % <sup>3)</sup>      |
|                                                   |                                                                         |         |                                                    |                        | 287 0,00 % <sup>3)</sup>      |
| 337                                               | ThyssenKrupp Liften B.V., Krimpen aan den IJssel, Niederlande           |         | 1.875                                              | 100,00                 | 324                           |
| 338                                               | ThyssenKrupp Rulletrapper A/S, Oslo, Norwegen                           | NOK     | 100                                                | 100,00                 | 319                           |
| 339                                               | ThyssenKrupp Vytahy s.r.o., Prag, Tschechische Republik                 | CZK     | 78.313                                             | 100,00                 | 301                           |
| 340                                               | ThyssenKrupp Vytahy s.r.o., Bratislava, Slowakische Republik            |         | 266                                                | 100,00                 | 317                           |
| 341                                               | TOB ThyssenKrupp Elevator Ukraine, Kiew, Ukraine                        | UAH     | 42.560 <sup>1)</sup>                               | 100,00                 | 301 99,90 %                   |
|                                                   |                                                                         |         |                                                    |                        | 285 0,10 %                    |
| 342                                               | Trapo Küng AG, Basel, Schweiz                                           | CHF     | 500                                                | 100,00                 | 316                           |
| <b>Southern Europe/Africa/Middle East (SEAME)</b> |                                                                         |         |                                                    |                        |                               |
| 343                                               | ASEL Ascensores S.L., Madrid, Spanien                                   |         | 7                                                  | 100,00                 | 366                           |
| 344                                               | Cont Ascensori S.r.l., Alessandria, Italien                             |         | 72                                                 | 100,00                 | 348                           |
| 345                                               | Curti Ascensori S.r.l., Bosisio Parini, Italien                         |         | 112                                                | 100,00                 | 348                           |
| 346                                               | Marco Bonfedi Ascensori Scale Mobili S.r.l., Mailand, Italien           |         | 50                                                 | 100,00                 | 348                           |
| 347                                               | Massida Ascensori S.r.l., Cagliari, Italien                             |         | 10 <sup>1)</sup>                                   | 100,00                 | 348                           |
| 348                                               | Nuova TKEI S.P.A., Milano, Italien                                      |         | 1.500                                              | 100,00                 | 686                           |
| 349                                               | Rossi Ascensori S.r.l., Prato-Firenze, Italien                          |         | 10 <sup>1)</sup>                                   | 100,00                 | 348                           |
| 350                                               | Sabia S.r.l., Modena, Italien                                           |         | 15 <sup>1)</sup>                                   | 100,00                 | 348                           |
| 351                                               | Scam Ascensori S.r.l., Mestre, Venezia, Italien                         |         | 16 <sup>1)</sup>                                   | 100,00                 | 348                           |
| 352                                               | SIAR S.r.l., Rom, Italien                                               |         | 47 <sup>1)</sup>                                   | 100,00                 | 348                           |
| 353                                               | Simonini Elevatori S.r.l., Foggia, Italien                              |         | 23 <sup>1)</sup>                                   | 100,00                 | 348                           |
| 354                                               | ThyssenKrupp Asansör Sanayi ve Tic. A.S., Istanbul, Türkei              | TRL     | 10953270.000                                       | 100,00                 | 301 67,55 %                   |
|                                                   |                                                                         |         |                                                    |                        | 287 32,45 %                   |
| 355                                               | ThyssenKrupp Assanbar PJSC (Private Joint Stock Company), Mashhad, Iran | IRR     | 8.702.400                                          | 51,00                  | 287 46,00 %                   |
|                                                   |                                                                         |         |                                                    |                        | 366 5,00 %                    |
| 356                                               | ThyssenKrupp Elevadores, S.A., Lissabon, Portugal                       |         | 3.586                                              | 100,00                 | 366                           |
| 357                                               | ThyssenKrupp Elevadores, S.L., Madrid, Spanien                          |         | 4.696                                              | 99,94                  | 366                           |
| 358                                               | ThyssenKrupp Elevator Almoayyed W.L.L., Manama, Bahrain                 | BHD     | 20                                                 | 70,00                  | 287                           |

<sup>1)</sup> Jahresabschluss nicht 30.09. <sup>2)</sup> nach IFRS Vorschriften einbezogen <sup>3)</sup> Splitteranteil ab der 4. Kommastelle <sup>4)</sup> Konzernmutter



VOLL KONSOLIDIERTE TOCHTERUNTERNEHMEN (Stand 30. September 2010)

| Laufende Nummer | Name und Sitz                                                                        | Währung | Gesellschafts-kapital in 1.000 € bzw. Fremdwährung | Anteil am Kapital in % | gehalten über laufende Nummer |
|-----------------|--------------------------------------------------------------------------------------|---------|----------------------------------------------------|------------------------|-------------------------------|
| 359             | ThyssenKrupp Elevator Egypt Ltd., Kairo, Ägypten                                     | EGP     | 2.500                                              | 100,00                 | 287 75,00 %                   |
|                 |                                                                                      |         |                                                    |                        | 366 25,00 %                   |
| 360             | ThyssenKrupp Elevator Israel LP, Rishon Le'zion, Israel                              | ILS     | 40.000                                             | 100,00                 | 285 49,90 %                   |
|                 |                                                                                      |         |                                                    |                        | 366 49,90 %                   |
|                 |                                                                                      |         |                                                    |                        | 722 0,20 %                    |
| 361             | ThyssenKrupp Elevator Italia S.p.A., Mailand, Italien                                |         | 490                                                | 100,00                 | 348 98,00 %                   |
|                 |                                                                                      |         |                                                    |                        | 287 2,00 %                    |
| 362             | ThyssenKrupp Elevator Manufacturing Spain S.L., Andoain, Spanien                     |         | 281                                                | 100,00                 | 357                           |
| 363             | ThyssenKrupp Elevator Maroc S.A.R.L., Casablanca. Marruecos, Marokko                 | MAD     | 1.085                                              | 100,00                 | 366 95,00 %                   |
|                 |                                                                                      |         |                                                    |                        | 357 5,00 %                    |
| 364             | ThyssenKrupp Elevator Saudi Co. Ltd., Riyadh, Saudi Arabien                          | SAR     | 2.000                                              | 100,00                 | 301 90,00 %                   |
|                 |                                                                                      |         |                                                    |                        | 286 10,00 %                   |
| 365             | ThyssenKrupp Elevator (South Africa) (Pty.) Ltd., Johannesburg, Republik Südafrika   | ZAR     | 111                                                | 100,00                 | 287                           |
| 366             | ThyssenKrupp Elevator Southern Europe, Africa & Middle East, S.L.U., Madrid, Spanien |         | 306.109                                            | 100,00                 | 665                           |
| 367             | ThyssenKrupp Elevator SRL, Bukarest, Rumänien                                        | RON     | 1.545 <sup>1)</sup>                                | 100,00                 | 366 100,00 % <sup>3)</sup>    |
|                 |                                                                                      |         |                                                    |                        | 357 0,00 % <sup>3)</sup>      |
| 368             | ThyssenKrupp Elevator UAE (L L C), Dubai, Vereinigte Arabische Emirate               | AED     | 80.300                                             | 100,00                 | 287                           |
| 369             | ThyssenKrupp Elevatori d.o.o., Belgrad, Serbien                                      |         | 350 <sup>1)</sup>                                  | 100,00                 | 317                           |
| 370             | ThyssenKrupp Elevator/Jordan Ltd. Co., Amman, Jordanien                              | JOD     | 1.569                                              | 100,00                 | 287                           |
| 371             | ThyssenKrupp Elevators Bulgaria EAD, Sofia, Bulgarien                                | BGN     | 1.000                                              | 100,00                 | 366                           |
| 372             | ThyssenKrupp Elevators Hellas S.A., Athen, Griechenland                              |         | 2.240                                              | 100,00                 | 287 51,00 %                   |
|                 |                                                                                      |         |                                                    |                        | 366 49,00 %                   |
| 373             | 2G S.r.l., Messina, Italien                                                          |         | 47 <sup>1)</sup>                                   | 100,00                 | 348                           |
|                 | <b>Americas (AMS)</b>                                                                |         |                                                    |                        |                               |
| 374             | Computerized Elevator Control Corp., New York, USA                                   | USD     | 8                                                  | 100,00                 | 386                           |
| 375             | ThyssenKrupp Elevadores, C.A., Caracas, Venezuela                                    | VEB     | 3.076                                              | 100,00                 | 357                           |
| 376             | ThyssenKrupp Elevadores, S.A., Guatemala, Guatemala                                  | GTQ     | 10.178 <sup>1)</sup>                               | 100,00                 | 357 90,00 %                   |
|                 |                                                                                      |         |                                                    |                        | 380 10,00 %                   |
| 377             | ThyssenKrupp Elevadores, S.A., São Paulo, Brasilien                                  | BRL     | 259.607                                            | 99,78                  | 357                           |
| 378             | ThyssenKrupp Elevadores S.A., Panama, Panama                                         | USD     | 867 <sup>1)</sup>                                  | 100,00                 | 357                           |
| 379             | ThyssenKrupp Elevadores S.A., Bogota, Kolumbien                                      | COP     | 5.657.905 <sup>1)</sup>                            | 100,00                 | 357 94,00 %                   |
|                 |                                                                                      |         |                                                    |                        | 376 1,50 %                    |
|                 |                                                                                      |         |                                                    |                        | 380 1,50 %                    |
|                 |                                                                                      |         |                                                    |                        | 381 1,50 %                    |
|                 |                                                                                      |         |                                                    |                        | 383 1,50 %                    |
| 380             | ThyssenKrupp Elevadores S.A., Buenos Aires, Argentinien                              | ARS     | 18.728 <sup>1)</sup>                               | 100,00                 | 357 94,98 %                   |
|                 |                                                                                      |         |                                                    |                        | 381 5,02 %                    |
| 381             | ThyssenKrupp Elevadores S.A., Santiago de Chile-Nunoa, Chile                         | CLP     | 2.289.533                                          | 100,00                 | 357 98,84 %                   |
|                 |                                                                                      |         |                                                    |                        | 380 1,16 %                    |
| 382             | ThyssenKrupp Elevadores, S.A. de C.V., Mexico City, Mexico                           | MXN     | 75.036                                             | 100,00                 | 357 99,93 %                   |
|                 |                                                                                      |         |                                                    |                        | 380 0,07 %                    |
| 383             | ThyssenKrupp Elevadores S.A.C., Lima, Peru                                           | PEN     | 12.556 <sup>1)</sup>                               | 100,00                 | 357 99,81 %                   |
|                 |                                                                                      |         |                                                    |                        | 380 0,19 %                    |
| 384             | ThyssenKrupp Elevadores, S.R.L., Asunción, Paraguay                                  | PYG     | 1.330.000 <sup>1)</sup>                            | 100,00                 | 357 99,90 %                   |
|                 |                                                                                      |         |                                                    |                        | 380 0,10 %                    |
| 385             | ThyssenKrupp Elevadores, S.R.L., Montevideo, Uruguay                                 | UYU     | 6.303                                              | 100,00                 | 357 95,00 %                   |
|                 |                                                                                      |         |                                                    |                        | 380 5,00 %                    |
| 386             | ThyssenKrupp Elevator Americas Corp., Wilmington/Delaware, USA                       | USD     | 0                                                  | 100,00                 | 691                           |
| 387             | ThyssenKrupp Elevator Canada Ltd., Toronto/Ontario, Kanada                           | CAD     | 4.141                                              | 100,00                 | 392                           |

<sup>1)</sup> Jahresabschluss nicht 30.09. <sup>2)</sup> nach IFRS Vorschriften einbezogen <sup>3)</sup> Splitteranteil ab der 4. Kommastelle <sup>4)</sup> Konzernmutter



**VOLL KONSOLIDIERTE TOCHTERUNTERNEHMEN (Stand 30. September 2010)**

| Laufende Nummer                                      | Name und Sitz                                                                            | Währung | Gesellschafts-kapital in 1.000 € bzw. Fremdwährung | Anteil am Kapital in % | gehalten über laufende Nummer |
|------------------------------------------------------|------------------------------------------------------------------------------------------|---------|----------------------------------------------------|------------------------|-------------------------------|
| 388                                                  | ThyssenKrupp Elevator Capital Corp., Wilmington/Delaware, USA                            | USD     | 302.250                                            | 100,00                 | 389                           |
| 389                                                  | ThyssenKrupp Elevator Corp., Wilmington/Delaware, USA                                    | USD     | 26.261                                             | 100,00                 | 386                           |
| 390                                                  | ThyssenKrupp Elevator Inc., San Juan, Puerto Rico                                        | USD     | 1                                                  | 100,00                 | 389                           |
| 391                                                  | ThyssenKrupp Elevator Manufacturing Inc., Collierville/Tennessee, USA                    | USD     | 1                                                  | 100,00                 | 389                           |
| 392                                                  | ThyssenKrupp Northern Elevator Corp., Scarborough/Ontario, Kanada                        | CAD     | 100                                                | 100,00                 | 679                           |
| <b>Asia/Pacific (AP)</b>                             |                                                                                          |         |                                                    |                        |                               |
| 393                                                  | PT. ThyssenKrupp Elevator Indonesia, Jakarta, Indonesien                                 | IDR     | 12.760.653                                         | 94,68                  | 287                           |
| 394                                                  | Sun Rhine Enterprises Ltd., Taipei, Taiwan                                               | TWD     | 138.075                                            | 100,00                 | 287                           |
| 395                                                  | Sun Rich Enterprises Ltd., Taipei, Taiwan                                                | TWD     | 6.000                                              | 100,00                 | 287                           |
| 396                                                  | Thyssen Elevators Co., Ltd., Zhongshan, VR China                                         | USD     | 31.680 <sup>1)</sup>                               | 100,00                 | 287                           |
| 397                                                  | ThyssenKrupp Elevator & Escalator (Shanghai) Co.Ltd., Shanghai, VR China                 | USD     | 5.250 <sup>1)</sup>                                | 100,00                 | 680                           |
| 398                                                  | ThyssenKrupp Elevator Asia Pacific Ltd., Hongkong, VR China                              | HKD     | 58.000                                             | 100,00                 | 287                           |
| 399                                                  | ThyssenKrupp Elevator Australia Pty. Ltd., Sydney/New South Wales, Australien            | AUD     | 1                                                  | 100,00                 | 412                           |
| 400                                                  | ThyssenKrupp Elevator (BD) Pvt. Ltd., Dhaka, Bangladesch                                 | BDT     | 3.395                                              | 100,00                 | 402                           |
| 401                                                  | ThyssenKrupp Elevator (HK) Ltd., Hongkong, VR China                                      | HKD     | 129.970                                            | 100,00                 | 287                           |
| 402                                                  | ThyssenKrupp Elevator (India) Pvt. Ltd., New Delhi, Indien                               | INR     | 881.620                                            | 100,00                 | 287                           |
|                                                      |                                                                                          |         |                                                    |                        | 100,00 % <sup>3)</sup>        |
|                                                      |                                                                                          |         |                                                    |                        | 0,00 % <sup>3)</sup>          |
| 403                                                  | ThyssenKrupp Elevator Installation and Maintenance (China) Co. Ltd., Guangzhou, VR China | USD     | 6.500 <sup>1)</sup>                                | 100,00                 | 680                           |
| 404                                                  | ThyssenKrupp Elevator (Korea) Ltd., Seoul, South Korea                                   | KRW     | 1.273.220                                          | 100,00                 | 287                           |
| 405                                                  | ThyssenKrupp Elevator Malaysia Sdn. Bhd., Selangor, Malaysia                             | MYR     | 500                                                | 100,00                 | 287                           |
| 406                                                  | ThyssenKrupp Elevator New Zealand Ltd., Auckland, Neuseeland                             | NZD     | 1                                                  | 100,00                 | 399                           |
| 407                                                  | ThyssenKrupp Elevator Queensland Pty. Ltd., Melbourne/Victoria, Australien               | AUD     | 1                                                  | 100,00                 | 412                           |
| 408                                                  | ThyssenKrupp Elevator (Singapore) Pte.Ltd., Singapur, Singapur                           | SGD     | 4.800                                              | 100,00                 | 287                           |
| 409                                                  | ThyssenKrupp Elevator (Thailand) Co., Ltd., Bangkok, Thailand                            | THB     | 155.776                                            | 100,00                 | 287                           |
| 410                                                  | ThyssenKrupp Elevator Vietnam Co. Ltd., Hanoi, Vietnam                                   | USD     | 200                                                | 100,00                 | 287                           |
| 411                                                  | ThyssenKrupp Elevators (Shanghai) Co., Ltd., Shanghai, VR China                          | USD     | 13.940 <sup>1)</sup>                               | 100,00                 | 680                           |
| 412                                                  | ThyssenKrupp Lifts Pacific Pty. Ltd., Alexandria/New South Wales, Australien             | AUD     | 10.800                                             | 100,00                 | 287                           |
| 413                                                  | TK Lif & Eskalator Sdn. Bhd., Shah Alam, Malaysia                                        | MYR     | 100                                                | 100,00                 | 398                           |
|                                                      |                                                                                          |         |                                                    |                        | 70,00 %                       |
|                                                      |                                                                                          |         |                                                    |                        | 405                           |
|                                                      |                                                                                          |         |                                                    |                        | 30,00 %                       |
| <b>Escalators/Passenger Boarding Bridges(ES/PBB)</b> |                                                                                          |         |                                                    |                        |                               |
| 414                                                  | ThyssenKrupp Elevator (EBC) GmbH, Berlin                                                 |         | 25                                                 | 100,00                 | 287                           |
| 415                                                  | ThyssenKrupp Elevator (ES/PBB) GmbH, Essen                                               |         | 25                                                 | 100,00                 | 287                           |
| 416                                                  | ThyssenKrupp Fahrtreppen GmbH, Hamburg                                                   |         | 1.311                                              | 100,00                 | 301                           |
| 417                                                  | AVIOTEAM Servizio e Manutenzioni S.r.l., Rom, Italien                                    |         | 52 <sup>1)</sup>                                   | 65,00                  | 418                           |
| 418                                                  | ThyssenKrupp Airport Services S.L., Mieres / Asturias, Spanien                           |         | 150 <sup>1)</sup>                                  | 100,00                 | 421                           |
| 419                                                  | ThyssenKrupp Airport Systems Co. (Zhongshan) Ltd., Guangdong, VR China                   | USD     | 2.550                                              | 100,00                 | 680                           |
| 420                                                  | ThyssenKrupp Airport Systems Inc., Fort Worth/Texas, USA                                 | USD     | 3.510                                              | 100,00                 | 691                           |
| 421                                                  | ThyssenKrupp Airport Systems, S.A., Mieres/Oviedo, Spanien                               |         | 1.743                                              | 100,00                 | 357                           |
|                                                      |                                                                                          |         |                                                    |                        | 100,00 % <sup>3)</sup>        |
|                                                      |                                                                                          |         |                                                    |                        | 425                           |
|                                                      |                                                                                          |         |                                                    |                        | 0,00 % <sup>3)</sup>          |
| 422                                                  | ThyssenKrupp Elevator (ES/PBB) Ltd., Newton Aycliffe, Großbritannien                     | GBP     | 4.135                                              | 100,00                 | 690                           |
| 423                                                  | ThyssenKrupp Elevator Innovation Center, S.A., Mieres/Oviedo, Spanien                    |         | 902                                                | 100,00                 | 425                           |
| 424                                                  | ThyssenKrupp Escalator Co. (China) Ltd., Guangdong, VR China                             | USD     | 14.800 <sup>1)</sup>                               | 100,00                 | 680                           |
| 425                                                  | ThyssenKrupp Norte S.A., Mieres/Oviedo, Spanien                                          |         | 4.147                                              | 100,00                 | 665                           |
|                                                      |                                                                                          |         |                                                    |                        | 66,30 %                       |
|                                                      |                                                                                          |         |                                                    |                        | 357                           |
|                                                      |                                                                                          |         |                                                    |                        | 33,70 %                       |
| <b>Accessibility (ACC)</b>                           |                                                                                          |         |                                                    |                        |                               |
| 426                                                  | ThyssenKrupp Accessibility Holding GmbH, Essen                                           |         | 25                                                 | 100,00                 | 287                           |
| 427                                                  | ThyssenKrupp Treppenlifte GmbH, Neuss                                                    |         | 32                                                 | 100,00                 | 287                           |
| 428                                                  | Lift Able Ltd., Cleveland, Großbritannien                                                | GBP     | 7                                                  | 100,00                 | 433                           |

<sup>1)</sup> Jahresabschluss nicht 30.09. <sup>2)</sup> nach IFRS Vorschriften einbezogen <sup>3)</sup> Splitteranteil ab der 4. Kommastelle <sup>4)</sup> Konzernmutter



**VOLL KONSOLIDIERTE TOCHTERUNTERNEHMEN (Stand 30. September 2010)**

| Laufende Nummer         | Name und Sitz                                                                     | Währung | Gesellschafts-kapital in 1.000 € bzw. Fremdwährung | Anteil am Kapital in % | gehalten über laufende Nummer |
|-------------------------|-----------------------------------------------------------------------------------|---------|----------------------------------------------------|------------------------|-------------------------------|
| 429                     | ThyssenKrupp Accesibilidad S.L., Madrid, Spanien                                  |         | 3                                                  | 100,00                 | 665                           |
| 430                     | ThyssenKrupp Access China Ltd., Shanghai, VR China                                | USD     | 500                                                | 100,00                 | 680                           |
| 431                     | ThyssenKrupp Access Corp., Kansas City/Missouri, USA                              | USD     | 0                                                  | 100,00                 | 691                           |
| 432                     | ThyssenKrupp Access Japan Co., Ltd., Tokio, Japan                                 | JPY     | 47.000                                             | 100,00                 | 287                           |
| 433                     | ThyssenKrupp Access Ltd., Stockton-on-Tees, Großbritannien                        | GBP     | 100                                                | 100,00                 | 690                           |
| 434                     | ThyssenKrupp Access Manufacturing, LLC, Delaware, USA                             | USD     | 2.500                                              | 100,00                 | 431                           |
| 435                     | ThyssenKrupp Accessibility B.V., Krimpen aan den IJssel, Niederlande              |         | 1.270                                              | 100,00                 | 324                           |
| 436                     | ThyssenKrupp Acessibilidades, Unipessoal, Lda., Sintra, Portugal                  |         | 50                                                 | 100,00                 | 287                           |
| 437                     | ThyssenKrupp Ceteco S.r.l., Pisa, Italien                                         |         | 500                                                | 100,00                 | 361                           |
| 438                     | ThyssenKrupp Monolift AB, Stockholm, Schweden                                     | SEK     | 100                                                | 100,00                 | 324                           |
| 439                     | ThyssenKrupp Monolift AS, Oslo, Norwegen                                          | NOK     | 110                                                | 100,00                 | 319                           |
| 440                     | ThyssenKrupp Monolift N.V., Gent, Belgien                                         |         | 450                                                | 100,00                 | 324 99,93 %                   |
|                         |                                                                                   |         |                                                    |                        | 426 0,07 %                    |
| 441                     | ThyssenKrupp Monolift S.A.S., Gennevilliers, Frankreich                           |         | 40                                                 | 100,00                 | 326                           |
| 442                     | ThyssenKrupp Monoliften B.V., Krimpen aan den IJssel, Niederlande                 |         | 97                                                 | 100,00                 | 324                           |
| <b>PLANT TECHNOLOGY</b> |                                                                                   |         |                                                    |                        |                               |
| <b>Uhde</b>             |                                                                                   |         |                                                    |                        |                               |
| 443                     | AWG Industrieanlagen und Wassertechnik GmbH Berlin, Berlin                        | DEM     | 50                                                 | 100,00                 | 445                           |
| 444                     | GKI-OFU Industrieofenbau GmbH, Dortmund                                           |         | 26                                                 | 100,00                 | 445                           |
| 445                     | Uhde GmbH, Dortmund                                                               |         | 49.650                                             | 100,00                 | 659 94,90 %                   |
|                         |                                                                                   |         |                                                    |                        | 651 5,10 %                    |
| 446                     | Uhde High Pressure Technologies GmbH, Hagen                                       |         | 1.023                                              | 100,00                 | 445                           |
| 447                     | Uhde Inventa-Fischer GmbH, Berlin                                                 |         | 3.210                                              | 100,00                 | 445                           |
| 448                     | Uhde Services GmbH, Haltern am See                                                |         | 588                                                | 100,00                 | 445                           |
| 449                     | OOO Uhde, Dzerzhinsk, Russland                                                    | RUB     | 3.058 <sup>1)</sup>                                | 100,00                 | 445                           |
| 450                     | OSC Process Engineering Ltd., Stockport, Großbritannien                           | GBP     | 350                                                | 90,00                  | 690                           |
| 451                     | ThyssenKrupp PDNA Engineering (Proprietary) Ltd., Sunninghill, Republik Südafrika | ZAR     | 1.000                                              | 74,90                  | 496                           |
| 452                     | Uhde Arabia Ltd., Al-Khobar, Saudi Arabien                                        | SAR     | 2.000                                              | 60,00                  | 445                           |
| 453                     | Uhde Asia Pacific Pty. Ltd., West Melbourne/Victoria, Australien                  | AUD     | 857                                                | 100,00                 | 445                           |
| 454                     | Uhde Corporation of America, Bridgeville/Pennsylvania, USA                        | USD     | 0                                                  | 100,00                 | 691                           |
| 455                     | Uhde Edeleanu S.E. Asia Pte. Ltd., Singapur, Singapur                             | SGD     | 1.000                                              | 100,00                 | 445                           |
| 456                     | Uhde Engineering Consulting (Shanghai) Co., Ltd., Shanghai, VR China              |         | 364 <sup>1)</sup>                                  | 100,00                 | 464                           |
| 457                     | Uhde Engineering de México, S.A. de C.V., Mexico D.F., Mexico                     | MXN     | 8.919                                              | 100,00                 | 462 99,99 %                   |
|                         |                                                                                   |         |                                                    |                        | 445 0,01 %                    |
| 458                     | Uhde Engineering Egypt Company (S.A.E.), Kairo, Ägypten                           | EGP     | 250                                                | 100,00                 | 445                           |
| 459                     | Uhde Fertilizer Technology B.V., Amsterdam, Niederlande                           |         | 18                                                 | 100,00                 | 688                           |
| 460                     | Uhde India Private Ltd., Mumbai, Indien                                           | INR     | 29.440                                             | 80,43                  | 445                           |
| 461                     | Uhde Inventa-Fischer AG, Domat / Ems, Schweiz                                     | CHF     | 100                                                | 100,00                 | 445                           |
| 462                     | Uhde Mexico S.A. de C.V., Mexico City, Mexico                                     | MXN     | 45.219                                             | 100,00                 | 445 98,06 %                   |
|                         |                                                                                   |         |                                                    |                        | 665 1,22 %                    |
|                         |                                                                                   |         |                                                    |                        | 466 0,72 %                    |
| 463                     | Uhde Services Slovakia s.r.o., Lazaretská, Slowakische Republik                   | SKK     | 200                                                | 100,00                 | 448 85,00 %                   |
|                         |                                                                                   |         |                                                    |                        | 445 15,00 %                   |
| 464                     | Uhde Shedden (Australia) Pty. Ltd., South Melbourne/Victoria, Australien          | AUD     | 5.757                                              | 100,00                 | 453                           |
| 465                     | Uhde Shedden (Thailand) Ltd., Bangkok, Thailand                                   | THB     | 31.000                                             | 48,38                  | 453                           |
| <b>Polysius</b>         |                                                                                   |         |                                                    |                        |                               |
| 466                     | Polysius AG, Beckum                                                               | DEM     | 21.000                                             | 100,00                 | 659 94,90 %                   |
|                         |                                                                                   |         |                                                    |                        | 651 5,10 %                    |

<sup>1)</sup> Jahresabschluss nicht 30.09. <sup>2)</sup> nach IFRS Vorschriften einbezogen <sup>3)</sup> Splitteranteil ab der 4. Kommastelle <sup>4)</sup> Konzernmutter



**VOLL KONSOLIDIERTE TOCHTERUNTERNEHMEN (Stand 30. September 2010)**

| Laufende Nummer           | Name und Sitz                                                                          | Währung | Gesellschafts-kapital in 1.000 € bzw. Fremdwährung | Anteil am Kapital in % | gehalten über laufende Nummer |
|---------------------------|----------------------------------------------------------------------------------------|---------|----------------------------------------------------|------------------------|-------------------------------|
| 467                       | A-C Equipment Services Corp., Milwaukee/Wisconsin, USA                                 | USD     | 4.500                                              | 100,00                 | 473                           |
| 468                       | ELEX CemCat AG, Schwerzenbach, Schweiz                                                 | CHF     | 100                                                | 60,00                  | 466                           |
| 469                       | Maerz Ofenbau AG, Zürich, Schweiz                                                      | CHF     | 1.000                                              | 100,00                 | 466                           |
| 470                       | OOO Polysius, Moskau, Russland                                                         | RUB     | 17.000                                             | 100,00                 | 466                           |
| 471                       | Polysius Asia Pacific Pte. Ltd., Singapur, Singapur                                    | SGD     | 100                                                | 100,00                 | 466                           |
| 472                       | Polysius Australia Pty. Ltd., Perth/Western Australia, Australien                      | AUD     | 50                                                 | 100,00                 | 466                           |
| 473                       | Polysius Corp., Atlanta/Georgia, USA                                                   | USD     | 0                                                  | 100,00                 | 691                           |
| 474                       | Polysius de Argentina S.A., Buenos Aires, Argentinien                                  | ARS     | 120                                                | 100,00                 | 466                           |
| 475                       | Polysius de Mexico S.A. de C.V., Mexico-City, Mexico                                   | MXN     | 12.000                                             | 100,00                 | 466                           |
| 476                       | Polysius del Peru S.A., Arequipa, Peru                                                 | PEN     | 28.678                                             | 100,00                 | 466 99,01 %                   |
|                           |                                                                                        |         |                                                    |                        | 475 0,99 %                    |
| 477                       | Polysius do Brasil Ltda., São Paulo, Brasilien                                         | BRL     | 62.179                                             | 100,00                 | 466                           |
| 478                       | Polysius Engineering Sdn. Bhd., Kuala Lumpur, Malaysia                                 | MYR     | 500                                                | 100,00                 | 466                           |
| 479                       | Polysius Ingenieria y Servicios del Peru S.A., Arequipa, Peru                          | PEN     | 410                                                | 100,00                 | 466 99,00 %                   |
|                           |                                                                                        |         |                                                    |                        | 474 1,00 %                    |
| 480                       | Polysius Ltd., Ascot/Berkshire, Großbritannien                                         | GBP     | 300                                                | 100,00                 | 690                           |
| 481                       | Polysius Polska Sp. z o.o., Warschau, Polen                                            | PLN     | 50                                                 | 100,00                 | 466                           |
| 482                       | Polysius S.A., Madrid, Spanien                                                         |         | 601                                                | 100,00                 | 665                           |
| 483                       | Polysius S.A.S., Aix en Provence, Frankreich                                           |         | 2.400                                              | 100,00                 | 684                           |
| 484                       | Polysius (Shanghai) Co., Ltd., Shanghai, VR China                                      |         | 12.082                                             | 100,00                 | 680                           |
| 485                       | Polysius Vietnam Ltd., Hanoi, Vietnam                                                  | VND     | 2.416.700                                          | 100,00                 | 466                           |
| 486                       | ThyssenKrupp Engineering (Proprietary) Ltd., Gabarone, Botsuana                        | BWP     | 3                                                  | 100,00                 | 496 99,97 %                   |
|                           |                                                                                        |         |                                                    |                        | 466 0,03 %                    |
| 487                       | ThyssenKrupp Servicios S.A. de C.V., Mexico D.F., Mexico                               | MXN     | 50                                                 | 100,00                 | 475 98,00 %                   |
|                           |                                                                                        |         |                                                    |                        | 466 2,00 %                    |
| 488                       | TOV Polysius Ukraine, Kiew, Ukraine                                                    |         | 300                                                | 100,00                 | 466                           |
| 489                       | Umatac Industrial Processes Inc., Calgary, Alberta, Kanada                             | CAD     | 5.636                                              | 70,00                  | 466                           |
| <b>Fördertechnik</b>      |                                                                                        |         |                                                    |                        |                               |
| 490                       | ThyssenKrupp Fördertechnik GmbH, Essen                                                 |         | 22.344                                             | 100,00                 | 659 94,90 %                   |
|                           |                                                                                        |         |                                                    |                        | 651 5,10 %                    |
| 491                       | Krupp Canada Inc., Calgary/Alberta, Kanada                                             | CAD     | 5.000                                              | 100,00                 | 490                           |
| 492                       | Mining Plants & Systems Bulgaria EOOD, Sofia, Bulgarien                                | BGN     | 5                                                  | 100,00                 | 490                           |
| 493                       | PWH Materials Handling Systems Inc., Calgary/Alberta, Kanada                           | CAD     | 20                                                 | 100,00                 | 490                           |
| 494                       | ThyssenKrupp BulkTec (China) Ltd., Beijing, VR China                                   |         | 5.000 <sup>1)</sup>                                | 100,00                 | 680                           |
| 495                       | ThyssenKrupp Engineering (Australia) Pty. Ltd., Stirling/Western Australia, Australien | AUD     | 170                                                | 100,00                 | 490                           |
| 496                       | ThyssenKrupp Engineering (Proprietary) Ltd., Sunninghill, Republik Südafrika           | ZAR     | 101                                                | 100,00                 | 445 60,00 %                   |
|                           |                                                                                        |         |                                                    |                        | 490 30,00 %                   |
|                           |                                                                                        |         |                                                    |                        | 466 10,00 %                   |
| 497                       | ThyssenKrupp Industries India Pvt. Ltd., Pimpri, Indien                                | INR     | 97.865                                             | 54,73                  | 637                           |
| 498                       | ThyssenKrupp Ingenieria Chile Ltda., Santiago de Chile, Chile                          | USD     | 15                                                 | 100,00                 | 501                           |
| 499                       | ThyssenKrupp KH Mineral S.A.S., Sarreguemines, Frankreich                              |         | 1.000                                              | 100,00                 | 684                           |
| 500                       | ThyssenKrupp Materials Handling Pty. Ltd., Stirling/Western Australia, Australien      | AUD     | 25                                                 | 100,00                 | 490                           |
| 501                       | ThyssenKrupp Robins Inc., Denver/Colorado, USA                                         | USD     | 0                                                  | 100,00                 | 691                           |
| <b>System Engineering</b> |                                                                                        |         |                                                    |                        |                               |
| 502                       | Bleuel & Röhling GmbH, Burghaun                                                        | DEM     | 290                                                | 51,03                  | 504                           |
| 503                       | Nothelfer Planung GmbH, Wadern-Lockweiler                                              |         | 51                                                 | 100,00                 | 504                           |
| 504                       | ThyssenKrupp Drauz Nothelfer GmbH, Heilbronn                                           |         | 11.500                                             | 100,00                 | 508 94,90 %                   |
|                           |                                                                                        |         |                                                    |                        | 651 5,10 %                    |

<sup>1)</sup> Jahresabschluss nicht 30.09. <sup>2)</sup> nach IFRS Vorschriften einbezogen <sup>3)</sup> Splitteranteil ab der 4. Kommastelle <sup>4)</sup> Konzernmutter



## VOLL KONSOLIDIERTE TOCHTERUNTERNEHMEN (Stand 30. September 2010)

| Laufende Nummer | Name und Sitz                                                                | Währung | Gesellschafts-kapital in 1.000 € bzw. Fremdwährung | Anteil am Kapital in % | gehalten über laufende Nummer |
|-----------------|------------------------------------------------------------------------------|---------|----------------------------------------------------|------------------------|-------------------------------|
| 505             | ThyssenKrupp EGM GmbH, Langenhagen                                           | DEM     | 250                                                | 100,00                 | 506 94,92 %                   |
|                 |                                                                              |         |                                                    |                        | 659 5,08 %                    |
| 506             | ThyssenKrupp Krause GmbH, Bremen                                             | DEM     | 10.000                                             | 100,00                 | 508 94,90 %                   |
|                 |                                                                              |         |                                                    |                        | 659 5,10 %                    |
| 507             | ThyssenKrupp KST GmbH, Hohenstein-Ernstthal                                  |         | 26                                                 | 100,00                 | 506                           |
| 508             | ThyssenKrupp System Engineering GmbH, Essen                                  |         | 50                                                 | 100,00                 | 659                           |
| 509             | OOO ThyssenKrupp System Engineering, Kaluga, Russische Föderation, Russland  | RUB     | 4.500                                              | 100,00                 | 508                           |
| 510             | ThyssenKrupp Krause Ltd., Redhill/Surrey, Großbritannien                     | GBP     | 0                                                  | 100,00                 | 690                           |
| 511             | ThyssenKrupp Production Systems Ltda., Diadema-São Paulo, Brasilien          | BRL     | 110.959                                            | 100,00                 | 659 99,75 %                   |
|                 |                                                                              |         |                                                    |                        | 598 0,25 %                    |
| 512             | ThyssenKrupp System Engineering, Inc., Auburn Hills/Michigan, USA            | USD     | 150                                                | 100,00                 | 691                           |
| 513             | ThyssenKrupp System Engineering Ltd., Coventry, Großbritannien               | GBP     | 150                                                | 100,00                 | 690                           |
| 514             | ThyssenKrupp System Engineering S.A., Barcelona, Spanien                     |         | 60                                                 | 100,00                 | 665                           |
| 515             | ThyssenKrupp System Engineering, S.A. de C.V., Santiago de Querétaro, Mexico | MXN     | 4.929 <sup>1)</sup>                                | 100,00                 | 506                           |
| 516             | ThyssenKrupp System Engineering S.A.S., Ensisheim, Frankreich                |         | 458                                                | 100,00                 | 684                           |
| 517             | ThyssenKrupp System Engineering (Shanghai) Co., Ltd., Shanghai, VR China     |         | 1.000 <sup>1)</sup>                                | 100,00                 | 680                           |
| 518             | ThyssenKrupp System Engineering Sp. z o.o., Gdansk, Polen                    | PLN     | 23.646                                             | 100,00                 | 506                           |
|                 | <b>Transrapid</b>                                                            |         |                                                    |                        |                               |
| 519             | ThyssenKrupp Transrapid GmbH, Kassel                                         | DEM     | 1.500                                              | 100,00                 | 659                           |
|                 | <b>Sonstige Beteiligungen Plant Technology</b>                               |         |                                                    |                        |                               |
| 520             | Uhde Services and Consulting GmbH, Dortmund                                  |         | 26                                                 | 100,00                 | 659                           |
|                 | <b>COMPONENTS TECHNOLOGY</b>                                                 |         |                                                    |                        |                               |
|                 | <b>Presta Camshafts</b>                                                      |         |                                                    |                        |                               |
| 521             | ThyssenKrupp Presta Chemnitz GmbH, Chemnitz                                  |         | 25                                                 | 100,00                 | 659                           |
| 522             | ThyssenKrupp Presta Ilsenburg GmbH, Ilsenburg                                |         | 307                                                | 100,00                 | 659 94,98 %                   |
|                 |                                                                              |         |                                                    |                        | 651 5,02 %                    |
| 523             | ThyssenKrupp Presta Dalian Co. Ltd., Dalian, VR China                        |         | 18.500                                             | 100,00                 | 680                           |
| 524             | ThyssenKrupp Presta Danville, LLC, Danville/Illinois, USA                    | USD     | 0                                                  | 100,00                 | 691                           |
| 525             | ThyssenKrupp Presta TecCenter AG, Eschen, Liechtenstein                      | CHF     | 10.000                                             | 100,00                 | 522                           |
|                 | <b>Forging-Group</b>                                                         |         |                                                    |                        |                               |
| 526             | ThyssenKrupp Gerlach GmbH, Homburg/Saar                                      |         | 34.257                                             | 100,00                 | 659                           |
| 527             | ThyssenKrupp Birmid, Newton Aycliffe, Großbritannien                         | GBP     | 0                                                  | 100,00                 | 674                           |
| 528             | ThyssenKrupp Crankshaft Co. LLC, Danville/Illinois, USA                      | USD     | 1                                                  | 100,00                 | 691                           |
| 529             | ThyssenKrupp Engine Components (China) Co., Ltd., Nanjing, VR China          | USD     | 76.000                                             | 100,00                 | 680                           |
| 530             | ThyssenKrupp Engine Components (India) Private Ltd., Nashik, Indien          | INR     | 300.000 <sup>1)</sup>                              | 100,00                 | 526 99,90 %                   |
|                 |                                                                              |         |                                                    |                        | 659 0,10 %                    |
| 531             | ThyssenKrupp Mavilor S.A., L'Horme, Frankreich                               |         | 89.965                                             | 100,00                 | 684                           |
| 532             | ThyssenKrupp Metalúrgica Campo Limpo Ltda., Campo Limpo Paulista, Brasilien  | BRL     | 85.000                                             | 59,77                  | 689                           |
| 533             | ThyssenKrupp Metalúrgica de México S.A. de C.V., Puebla, Mexico              | MXN     | 141.800                                            | 100,00                 | 532                           |
| 534             | ThyssenKrupp Metalúrgica de Servicios S.A. de C.V., Puebla, Mexico           | MXN     | 131                                                | 100,00                 | 533                           |
| 535             | ThyssenKrupp Metalúrgica Santa Luzia Ltda., Santa Luzia, Brasilien           | BRL     | 58.198                                             | 100,00                 | 532                           |
|                 | <b>Waupaca</b>                                                               |         |                                                    |                        |                               |
| 536             | ThyssenKrupp Waupaca de Mexico, S. de R.L. de C.V., Mexico, Mexico           | USD     | 3                                                  | 100,00                 | 537 95,00 %                   |
|                 |                                                                              |         |                                                    |                        | 676 5,00 %                    |
| 537             | ThyssenKrupp Waupaca, Inc., Waupaca/Wisconsin, USA                           | USD     | 0                                                  | 100,00                 | 676                           |
|                 | <b>Rothe Erde</b>                                                            |         |                                                    |                        |                               |
| 538             | PSL Wälzlager GmbH, Dietzenbach                                              |         | 26                                                 | 100,00                 | 549                           |
| 539             | Rothe Erde GmbH, Dortmund                                                    |         | 12.790                                             | 100,00                 | 659 80,00 %                   |
|                 |                                                                              |         |                                                    |                        | 648 20,00 %                   |

<sup>1)</sup> Jahresabschluss nicht 30.09. <sup>2)</sup> nach IFRS Vorschriften einbezogen <sup>3)</sup> Splitteranteil ab der 4. Kommastelle <sup>4)</sup> Konzernmutter



**VOLL KONSOLIDIERTE TOCHTERUNTERNEHMEN (Stand 30. September 2010)**

| Laufende Nummer | Name und Sitz                                                                       | Währung | Gesellschafts-kapital in 1.000 € bzw. Fremdwährung | Anteil am Kapital in % | gehalten über laufende Nummer |
|-----------------|-------------------------------------------------------------------------------------|---------|----------------------------------------------------|------------------------|-------------------------------|
| 540             | Definox (Beijing) Stainless Steel Equipment Ltd., Beijing, VR China                 | CNY     | 1.341 <sup>1)</sup>                                | 100,00                 | 545                           |
| 541             | Defontaine Ibérica S.A., Viana, Spanien                                             |         | 721                                                | 100,00                 | 545                           |
| 542             | Defontaine Italia S.r.l., Sesto San Giovanni, Italien                               |         | 99                                                 | 100,00                 | 545                           |
| 543             | Defontaine of America, Inc., New Berlin/Wisconsin, USA                              | USD     | 50                                                 | 100,00                 | 691                           |
| 544             | Defontaine (Qingdao) Machinery Co., Ltd., Jiaonan City, Shandong Province, VR China |         | 33.500                                             | 100,00                 | 680                           |
| 545             | Defontaine S.A., Saint Herblain, Frankreich                                         |         | 4.603                                              | 100,00                 | 684 99,99 %                   |
|                 |                                                                                     |         |                                                    |                        | 539 0,01 %                    |
| 546             | Defontaine Tunisie S.A., Ben Arous, Tunesien                                        | TND     | 1.500                                              | 50,97                  | 545                           |
| 547             | Nippon Roballo Company Ltd., Minato-ku/Tokio, Japan                                 | JPY     | 740.000                                            | 100,00                 | 539                           |
| 548             | OOO PSL, Moskau, Russland                                                           | RUB     | 100 <sup>1)</sup>                                  | 100,00                 | 549 99,00 %                   |
|                 |                                                                                     |         |                                                    |                        | 538 1,00 %                    |
| 549             | PSL a.s., Povazská Bystrica, Slowakische Republik                                   | SKK     | 234.000                                            | 100,00                 | 539                           |
| 550             | PSL of America Inc., Twinsburg/Ohio, USA                                            | USD     | 1                                                  | 100,00                 | 549                           |
| 551             | REX (Xuzhou) Slewing Bearing Co., Ltd., Xuzhou, VR China                            | USD     | 39.500 <sup>1)</sup>                               | 60,00                  | 680                           |
| 552             | Roballo Engineering Company Ltd., Peterlee, Großbritannien                          | GBP     | 1.000                                              | 100,00                 | 690                           |
| 553             | Robrasa Rolamentos Especiais Rothe Erde Ltda., Diadema, Brasilien                   | BRL     | 10.119                                             | 100,00                 | 659                           |
| 554             | Rotek Incorporated, Aurora/Ohio, USA                                                | USD     | 100                                                | 100,00                 | 691                           |
| 555             | Rothe Erde - Metallurgica Rossi S.p.A., Visano, Italien                             |         | 1.612                                              | 100,00                 | 686                           |
| 556             | Rothe Erde Ibérica S.A., Zaragoza, Spanien                                          |         | 1.369                                              | 100,00                 | 665                           |
| 557             | Rothe Erde India Private Ltd., Maharashtra, Indien                                  | INR     | 1.190.570                                          | 100,00                 | 539                           |
| 558             | Xuzhou Rothe Erde Ring Mill Co., Ltd., Xuzhou, VR China                             | USD     | 27.749 <sup>1)</sup>                               | 100,00                 | 680                           |
| 559             | Xuzhou Rothe Erde Slewing Bearing Co., Ltd., Xuzhou, VR China                       | USD     | 27.300 <sup>1)</sup>                               | 60,00                  | 680                           |
|                 | <b>Berco</b>                                                                        |         |                                                    |                        |                               |
| 560             | BERCO Deutschland GmbH, Ennepetal                                                   | DEM     | 4.668                                              | 100,00                 | 659                           |
| 561             | Berco Bulgaria EOOD, Apriltsi, Bulgarien                                            | BGN     | 780                                                | 100,00                 | 565                           |
| 562             | Berco of America Inc., Waukesha/Wisconsin, USA                                      | USD     | 50                                                 | 100,00                 | 691                           |
| 563             | Berco (Shanghai) Undercarriage Technology Co., Ltd., Shanghai, VR China             |         | 4.000                                              | 100,00                 | 680                           |
| 564             | Berco (Shanghai) Undercarriage Trading Co., Ltd., Shanghai, VR China                |         | 2.000                                              | 100,00                 | 680                           |
| 565             | Berco S.p.A., Copparo, Italien                                                      |         | 38.700                                             | 100,00                 | 686 99,95 %                   |
|                 |                                                                                     |         |                                                    |                        | 651 0,05 %                    |
| 566             | Berco (UK) Ltd., Birmingham, Großbritannien                                         | GBP     | 120                                                | 100,00                 | 690                           |
| 567             | Berco Undercarriages (India) Private Ltd., Andrah Pradesh, Indien                   | INR     | 265.500                                            | 100,00                 | 565 99,00 %                   |
|                 |                                                                                     |         |                                                    |                        | 560 1,00 %                    |
| 568             | BercoSul Ltda., Diadema-São Paulo, Brasilien                                        | BRL     | 14.062                                             | 100,00                 | 565                           |
| 569             | Olympic Tracks, Inc., Puyallup/Washington, USA                                      | USD     | 50                                                 | 100,00                 | 562                           |
|                 | <b>Presta Steering</b>                                                              |         |                                                    |                        |                               |
| 570             | BMB Steering Innovation GmbH, Schönebeck                                            |         | 512                                                | 100,00                 | 572                           |
| 571             | ThyssenKrupp Presta München/Esslingen GmbH, München                                 |         | 50                                                 | 100,00                 | 590                           |
| 572             | ThyssenKrupp Presta SteerTec GmbH, Düsseldorf                                       |         | 5.114                                              | 100,00                 | 659 94,99 %                   |
|                 |                                                                                     |         |                                                    |                        | 651 5,01 %                    |
| 573             | ThyssenKrupp Presta SteerTec Mülheim GmbH, Mülheim                                  |         | 26                                                 | 100,00                 | 572                           |
| 574             | ThyssenKrupp Presta SteerTec Schönebeck GmbH, Schönebeck                            |         | 26                                                 | 100,00                 | 572                           |
| 575             | ThyssenKrupp Automotive Sales & Technical Center, Inc., Troy/Michigan, USA          | USD     | 3                                                  | 100,00                 | 691                           |
| 576             | ThyssenKrupp Presta Aktiengesellschaft, Eschen, Liechtenstein                       | CHF     | 15.000                                             | 100,00                 | 659                           |
| 577             | ThyssenKrupp Presta Cold Forging LLC, Wilmington/Delaware, USA                      | USD     | 5.000                                              | 100,00                 | 575                           |
| 578             | ThyssenKrupp Presta de México S.A. de C.V., Puebla, Mexico                          | MXN     | 17.316                                             | 100,00                 | 581 33,33 %                   |
|                 |                                                                                     |         |                                                    |                        | 590 33,33 %                   |
|                 |                                                                                     |         |                                                    |                        | 602 33,33 %                   |
| 579             | ThyssenKrupp Presta do Brasil Ltda., Curitiba, Brasilien                            | BRL     | 36.944                                             | 100,00                 | 581 89,81 %                   |
|                 |                                                                                     |         |                                                    |                        | 590 10,19 %                   |

<sup>1)</sup> Jahresabschluss nicht 30.09. <sup>2)</sup> nach IFRS Vorschriften einbezogen <sup>3)</sup> Splitteranteil ab der 4. Kommastelle <sup>4)</sup> Konzernmutter



**VOLL KONSOLIDIERTE TOCHTERUNTERNEHMEN (Stand 30. September 2010)**

| Laufende Nummer                                     | Name und Sitz                                                                             | Währung | Gesellschafts-kapital in 1.000 € bzw. Fremdwährung | Anteil am Kapital in % | gehalten über laufende Nummer |
|-----------------------------------------------------|-------------------------------------------------------------------------------------------|---------|----------------------------------------------------|------------------------|-------------------------------|
| 580                                                 | ThyssenKrupp Presta Fawer (Changchun) Co. Ltd., Changchun, VR China                       | CNY     | 52.834 <sup>1)</sup>                               | 59,65                  | 581                           |
| 581                                                 | ThyssenKrupp Presta France S.A.S., Florange, Frankreich                                   |         | 23.660                                             | 100,00                 | 684                           |
| 582                                                 | ThyssenKrupp Presta HuiZhong Shanghai Co., Ltd., Shanghai, VR China                       | CNY     | 100.562 <sup>1)</sup>                              | 60,00                  | 581                           |
| 583                                                 | ThyssenKrupp Presta Hungary Kft., Budapest, Ungarn                                        | HUF     | 632.770                                            | 100,00                 | 571                           |
| 584                                                 | ThyssenKrupp Presta Japan Co., Ltd., Tokio, Japan                                         | JPY     | 10.000                                             | 100,00                 | 659                           |
| 585                                                 | ThyssenKrupp Presta Servicios de México S.A. de C.V., Puebla, Mexico                      | MXN     | 50 <sup>1)</sup>                                   | 100,00                 | 590 33,33 %                   |
|                                                     |                                                                                           |         |                                                    |                        | 581 33,33 %                   |
|                                                     |                                                                                           |         |                                                    |                        | 602 33,33 %                   |
| 586                                                 | ThyssenKrupp Presta SteerTec Polen Sp.z o.o., Meseritz, Polen                             | PLN     | 3.664                                              | 100,00                 | 572                           |
| 587                                                 | ThyssenKrupp Presta Terre Haute, LLC, Terre Haute/Indiana, USA                            | USD     | 4.000                                              | 100,00                 | 575                           |
| <b>Bilstein-Gruppe</b>                              |                                                                                           |         |                                                    |                        |                               |
| 588                                                 | HF Vermögensverwaltungsgesellschaft im Ruhrtal GmbH, Hagen                                |         | 2.098                                              | 99,95                  | 593                           |
| 589                                                 | Kraemer & Freund Handel GmbH, Hagen                                                       |         | 100                                                | 100,00                 | 593                           |
| 590                                                 | ThyssenKrupp Automotive Systems GmbH, Essen                                               |         | 2.557                                              | 100,00                 | 659                           |
| 591                                                 | ThyssenKrupp Bilstein Suspension GmbH, Ennepetal                                          |         | 5.982                                              | 99,50                  | 659 94,49 %                   |
|                                                     |                                                                                           |         |                                                    |                        | 651 5,01 %                    |
| 592                                                 | ThyssenKrupp Bilstein Tuning GmbH, Ennepetal                                              |         | 100                                                | 100,00                 | 591                           |
| 593                                                 | ThyssenKrupp Federn GmbH, Hagen                                                           |         | 15.595                                             | 100,00                 | 591 94,99 %                   |
|                                                     |                                                                                           |         |                                                    |                        | 651 5,01 %                    |
| 594                                                 | ThyssenKrupp Automotive Systèmes France S.A.R.L., Hambach, Frankreich                     |         | 152                                                | 100,00                 | 684                           |
| 595                                                 | ThyssenKrupp Automotive Systems de México S.A. de C.V., Puebla, Mexico                    | MXN     | 50                                                 | 100,00                 | 590 100,00 % <sup>3)</sup>    |
|                                                     |                                                                                           |         |                                                    |                        | 578 0,00 % <sup>3)</sup>      |
| 596                                                 | ThyssenKrupp Automotive Systems Industrial do Brasil Ltda., Paraná, Brasilien             | BRL     | 170.400                                            | 100,00                 | 590 93,74 %                   |
|                                                     |                                                                                           |         |                                                    |                        | 532 6,26 %                    |
|                                                     |                                                                                           |         |                                                    |                        | 598 0,00 % <sup>3)</sup>      |
| 597                                                 | ThyssenKrupp Automotive Systems of America, LLC, Wilmington/Delaware, USA                 | USD     | 1                                                  | 100,00                 | 691                           |
| 598                                                 | ThyssenKrupp Bilstein Brasil Molas e Componentes de Suspensão Ltda., São Paulo, Brasilien | BRL     | 76.090                                             | 100,00                 | 593 100,00 % <sup>3)</sup>    |
|                                                     |                                                                                           |         |                                                    |                        | 636 0,00 % <sup>3)</sup>      |
| 599                                                 | ThyssenKrupp Bilstein Compa S.A., Sibiu, Rumänien                                         | LEU     | 30.291                                             | 73,00                  | 591 72,82 %                   |
|                                                     |                                                                                           |         |                                                    |                        | 504 0,09 %                    |
|                                                     |                                                                                           |         |                                                    |                        | 593 0,09 %                    |
| 600                                                 | ThyssenKrupp Bilstein Ibérica, S.L.U., Alonsotegui, Spanien                               |         | 8.297                                              | 100,00                 | 665                           |
| 601                                                 | ThyssenKrupp Bilstein of America Inc., San Diego/California, USA                          | USD     | 945                                                | 100,00                 | 691                           |
| 602                                                 | ThyssenKrupp Bilstein Sasa S.A. de C.V., San Luis Potosi, Mexico                          | MXN     | 457.561                                            | 100,00                 | 593                           |
| 603                                                 | ThyssenKrupp Bilstein Woodhead Ltd., Leeds, Großbritannien                                | GBP     | 7.610                                              | 100,00                 | 674                           |
| 604                                                 | ThyssenKrupp Fawer Liaoyang Spring Co., Ltd., Liaoyang/Liaoning, VR China                 | USD     | 21.278 <sup>1)</sup>                               | 60,00                  | 680                           |
| 605                                                 | ThyssenKrupp Sasa Servicios, S.A.de C.V., San Luis Potosi, Mexico                         | MXN     | 50                                                 | 100,00                 | 602                           |
| <b>Sonstige Beteiligungen Components Technology</b> |                                                                                           |         |                                                    |                        |                               |
| 606                                                 | ThyssenKrupp Technologies Japan Co., Ltd., Tokio, Japan                                   | JPY     | 10.000                                             | 100,00                 | 659                           |
| <b>MARINE SYSTEMS</b>                               |                                                                                           |         |                                                    |                        |                               |
| <b>Naval</b>                                        |                                                                                           |         |                                                    |                        |                               |
| 607                                                 | Blohm + Voss Marine Systems GmbH, Hamburg                                                 |         | 25                                                 | 100,00                 | 633                           |
| 608                                                 | Emder Werft und Dockbetriebe GmbH, Emden                                                  |         | 12.790                                             | 100,00                 | 633                           |
| 609                                                 | Hörn-Beteiligungs-GmbH, Kiel                                                              |         | 26                                                 | 100,00                 | 610                           |
| 610                                                 | Howaldtswerke-Deutsche Werft GmbH, Kiel                                                   |         | 30.000                                             | 100,00                 | 633                           |
| 611                                                 | IKL Ingenieurkontor Lübeck GmbH, Kiel                                                     |         | 26                                                 | 100,00                 | 610                           |
| 612                                                 | Innovative Meerestechnik GmbH, Emden                                                      |         | 1.023                                              | 100,00                 | 608                           |
| 613                                                 | Schiffahrtskontor "MARITIM" GmbH, Kiel                                                    |         | 26                                                 | 100,00                 | 610                           |
| 614                                                 | SDC Sheltered Docking Center GmbH, Kiel                                                   |         | 25                                                 | 100,00                 | 610                           |

<sup>1)</sup> Jahresabschluss nicht 30.09. <sup>2)</sup> nach IFRS Vorschriften einbezogen <sup>3)</sup> Splitteranteil ab der 4. Kommastelle <sup>4)</sup> Konzernmutter



## VOLL KONSOLIDIERTE TOCHTERUNTERNEHMEN (Stand 30. September 2010)

| Laufende Nummer                              | Name und Sitz                                                           | Währung | Gesellschafts-kapital in 1.000 € bzw. Fremdwährung | Anteil am Kapital in % | gehalten über laufende Nummer |
|----------------------------------------------|-------------------------------------------------------------------------|---------|----------------------------------------------------|------------------------|-------------------------------|
| 615                                          | ThyssenKrupp Fahrzeugtechnik GmbH, Emden                                |         | 1.050                                              | 100,00                 | 608                           |
| 616                                          | Blohm+Voss El Djazair S.a.r.l., Algier, Algerien                        | DZD     | 10.000                                             | 100,00                 | 621                           |
| 617                                          | Greek Naval Shipyards Holding S.A., Skaramanga, Griechenland            |         | 62.265                                             | 100,00                 | 609                           |
| 618                                          | Kockums AB, Malmö, Schweden                                             | SEK     | 50.000                                             | 100,00                 | 610                           |
| 619                                          | ThyssenKrupp Marin Sistem Gemi Sanayi ve Ticaret A.S., Istanbul, Türkei | TRY     | 200 <sup>1)</sup>                                  | 60,00                  | 633                           |
| 620                                          | ThyssenKrupp Marine Systems Canada Inc., Ottawa/Ontario, Kanada         | CAD     | 100                                                | 100,00                 | 633                           |
| 621                                          | ThyssenKrupp Marine Systems International Pte. Ltd., Singapur, Singapur | SGD     | 30.333                                             | 100,00                 | 633                           |
| <b>Shipyards and Services</b>                |                                                                         |         |                                                    |                        |                               |
| 622                                          | BIS Blohm + Voss Inspection Service GmbH, Hamburg                       |         | 26                                                 | 100,00                 | 626                           |
| 623                                          | Blohm + Voss Industries GmbH, Hamburg                                   |         | 10.226                                             | 100,00                 | 656                           |
| 624                                          | Blohm + Voss Naval GmbH, Hamburg                                        |         | 50                                                 | 100,00                 | 633                           |
| 625                                          | Blohm + Voss Repair GmbH, Hamburg                                       |         | 2.560                                              | 100,00                 | 633                           |
| 626                                          | Blohm + Voss Shipyards GmbH, Hamburg                                    |         | 8.950                                              | 100,00                 | 633                           |
| 627                                          | SVG Steinwerder Verwaltungsgesellschaft mbH, Hamburg                    |         | 30                                                 | 100,00                 | 633                           |
| 628                                          | Blohm & Voss Industries (China) Ltd., Hongkong, VR China                | HKD     | 300                                                | 100,00                 | 623                           |
| 629                                          | Blohm + Voss Industries (Shanghai) Ltd., Shanghai, VR China             | USD     | 140                                                | 100,00                 | 628                           |
| 630                                          | Blohm + Voss (Korea) Ltd., Pusan, South Korea                           | KRW     | 75.000                                             | 75,00                  | 623                           |
| 631                                          | Blohm+Voss Oil Tools, LLC, Wilmington/Delaware, USA                     | USD     | 5.000                                              | 100,00                 | 691                           |
| <b>Sonstige Beteiligungen Marine Systems</b> |                                                                         |         |                                                    |                        |                               |
| 632                                          | Blohm + Voss Shipyards & Services GmbH, Hamburg                         |         | 25                                                 | 100,00                 | 633                           |
| 633                                          | ThyssenKrupp Marine Systems AG, Hamburg                                 |         | 34.087                                             | 100,00                 | 634                           |
| 634                                          | ThyssenKrupp Marine Systems Beteiligungen GmbH, Essen                   |         | 1.857                                              | 100,00                 | 659                           |
|                                              |                                                                         |         |                                                    |                        | 70,00 %                       |
|                                              |                                                                         |         |                                                    |                        | 656                           |
|                                              |                                                                         |         |                                                    |                        | 30,00 %                       |
| <b>CORPORATE</b>                             |                                                                         |         |                                                    |                        |                               |
| <b>Corporate Headquarters</b>                |                                                                         |         |                                                    |                        |                               |
| 635                                          | Banter See Vermögensverwaltung GmbH, Düsseldorf                         |         | 486                                                | 100,00                 | 653                           |
| 636                                          | Brüninghaus Schmiede GmbH, Grünwald                                     |         | 511                                                | 100,00                 | 659                           |
| 637                                          | Buckau-Walther GmbH, Grünwald                                           |         | 9.216                                              | 100,00                 | 659                           |
| 638                                          | Bucketwheel Engineering GmbH, Essen                                     |         | 26                                                 | 100,00                 | 637                           |
| 639                                          | CCI Crane Cooperation International Handelsgesellschaft mbH, Essen      |         | 1.534                                              | 100,00                 | 651                           |
| 640                                          | GLH GmbH, Essen                                                         | DEM     | 30.000                                             | 100,00                 | 664                           |
| 641                                          | Hoesch AG, Düsseldorf                                                   |         | 50                                                 | 100,00                 | 651                           |
| 642                                          | Konsortium für Kurssicherung GbR, Düsseldorf                            |         | 39.113                                             | 97,76                  | 4                             |
|                                              |                                                                         |         |                                                    |                        | 43,80 %                       |
|                                              |                                                                         |         |                                                    |                        | 81                            |
|                                              |                                                                         |         |                                                    |                        | 18,99 %                       |
|                                              |                                                                         |         |                                                    |                        | 651                           |
|                                              |                                                                         |         |                                                    |                        | 17,07 %                       |
|                                              |                                                                         |         |                                                    |                        | 659                           |
|                                              |                                                                         |         |                                                    |                        | 11,67 %                       |
|                                              |                                                                         |         |                                                    |                        | 142                           |
|                                              |                                                                         |         |                                                    |                        | 5,57 %                        |
|                                              |                                                                         |         |                                                    |                        | 287                           |
|                                              |                                                                         |         |                                                    |                        | 0,65 %                        |
| 643                                          | Krupp Entwicklungszentrum GmbH, Essen                                   |         | 1.534                                              | 100,00                 | 697                           |
| 644                                          | Krupp Industrietechnik GmbH, Essen                                      |         | 51.129                                             | 100,00                 | 648                           |
|                                              |                                                                         |         |                                                    |                        | 94,90 %                       |
|                                              |                                                                         |         |                                                    |                        | 651                           |
|                                              |                                                                         |         |                                                    |                        | 5,10 %                        |
| 645                                          | Krupp Informatik GmbH, Düsseldorf                                       |         | 51                                                 | 100,00                 | 637                           |
| 646                                          | MONTAN GmbH Assekuranz-Makler, Düsseldorf                               |         | 184                                                | 53,81                  | 658                           |
| 647                                          | Reisebüro Dr. Tigges GmbH, Essen                                        |         | 300                                                | 76,00                  | 142                           |
| 648                                          | Thyssen Stahl GmbH, Düsseldorf                                          |         | 935.147                                            | 100,00                 | 651                           |
|                                              |                                                                         |         |                                                    |                        | 82,64 %                       |
|                                              |                                                                         |         |                                                    |                        | 697                           |
|                                              |                                                                         |         |                                                    |                        | 17,36 %                       |
| 649                                          | ThyssenKrupp Academy GmbH, Düsseldorf                                   |         | 25                                                 | 100,00                 | 651                           |
| 650                                          | ThyssenKrupp AdMin GmbH, Düsseldorf                                     |         | 25                                                 | 100,00                 | 653                           |
| 651                                          | ThyssenKrupp AG, Duisburg und Essen                                     |         | 1.317.092                                          | <sup>4)</sup>          |                               |

<sup>1)</sup> Jahresabschluss nicht 30.09. <sup>2)</sup> nach IFRS Vorschriften einbezogen <sup>3)</sup> Splitteranteil ab der 4. Kommastelle <sup>4)</sup> Konzernmutter



## VOLL KONSOLIDIERTE TOCHTERUNTERNEHMEN (Stand 30. September 2010)

| Laufende Nummer          | Name und Sitz                                                            | Währung | Gesellschafts-kapital in 1.000 € bzw. Fremdwährung | Anteil am Kapital in % | gehalten über laufende Nummer                          |
|--------------------------|--------------------------------------------------------------------------|---------|----------------------------------------------------|------------------------|--------------------------------------------------------|
| 652                      | ThyssenKrupp DeliCate GmbH, Düsseldorf                                   |         | 26                                                 | 100,00                 | 653                                                    |
| 653                      | ThyssenKrupp Dienstleistungen GmbH, Düsseldorf                           |         | 15.500                                             | 100,00                 | 651                                                    |
| 654                      | ThyssenKrupp Erste Beteiligungsgesellschaft mbH, Düsseldorf              |         | 25                                                 | 100,00                 | 648                                                    |
| 655                      | ThyssenKrupp Management Consulting GmbH, Düsseldorf                      |         | 25                                                 | 100,00                 | 653                                                    |
| 656                      | ThyssenKrupp Marine Systems Industrieholding GmbH, Hamburg               |         | 48.573                                             | 100,00                 | 651                                                    |
| 657                      | ThyssenKrupp Reinsurance AG, Essen                                       |         | 3.000                                              | 100,00                 | 658                                                    |
| 658                      | ThyssenKrupp Risk and Insurance Services GmbH, Essen                     |         | 3.000                                              | 100,00                 | 651                                                    |
| 659                      | ThyssenKrupp Technologies Beteiligungen GmbH, Essen                      |         | 130.000                                            | 100,00                 | 651                                                    |
| 660                      | ThyssenKrupp TKW Verwaltungs GmbH, Bochum                                |         | 512                                                | 100,00                 | 653                                                    |
| 661                      | Vermögensverwaltungsgesellschaft EZM mbH, Grünwald                       |         | 4.142                                              | 100,00                 | 648                                                    |
| 662                      | Vermögensverwaltungsgesellschaft KSH mbH, Grünwald                       |         | 5.113                                              | 100,00                 | 651                                                    |
| 663                      | Budcan Holdings Inc., Kitchener/Ontario, Kanada                          | CAD     | 0                                                  | 100,00                 | 676                                                    |
| 664                      | GLH, LLC, Fond du Lac/Wisconsin, USA                                     | USD     | 108.993                                            | 100,00                 | 691                                                    |
| 665                      | Grupo ThyssenKrupp S.L., Madrid, Spanien                                 |         | 16.156                                             | 100,00                 | 651                                                    |
| 666                      | Kitchener Frame Limited, Toronto/Ontario, Kanada                         | CAD     | 0                                                  | 100,00                 | 675                                                    |
| 667                      | QDF Components Ltd., Derby, Großbritannien                               | GBP     | 19.680                                             | 100,00                 | 674                                                    |
| 668                      | Thyssen Acquisition Corp., Dover/Delaware, USA                           | USD     | 2                                                  | 100,00                 | 691                                                    |
| 669                      | ThyssenKrupp Austria Beteiligungs GmbH, Wien, Österreich                 |         | 35                                                 | 100,00                 | 671                                                    |
| 670                      | ThyssenKrupp Austria GmbH, Wien, Österreich                              |         | 35                                                 | 100,00                 | 651                                                    |
| 671                      | ThyssenKrupp Austria GmbH & Co. KG, Wien, Österreich                     |         | 35                                                 | 100,00                 | 651                                                    |
| 672                      | ThyssenKrupp Automotive Systems UK Ltd., Coventry, Großbritannien        | GBP     | 200                                                | 100,00                 | 674                                                    |
| 673                      | ThyssenKrupp Automotive Talent Services Ltd., Durham, Großbritannien     | GBP     | 1.167                                              | 100,00                 | 25                                                     |
| 674                      | ThyssenKrupp Automotive (UK) Ltd., Newton Aycliffe, Großbritannien       | GBP     | 13.519                                             | 100,00                 | 690                                                    |
| 675                      | ThyssenKrupp Budd Canada Inc., Kitchener/Ontario, Kanada                 | CAD     | 68.875                                             | 100,00                 | 663                                                    |
| 676                      | ThyssenKrupp Budd Company, Troy/Michigan, USA                            | USD     | 1                                                  | 100,00                 | 668                                                    |
| 677                      | ThyssenKrupp Camford Engineering PLC, Newton Aycliffe, Großbritannien    | GBP     | 5.207                                              | 100,00                 | 674                                                    |
| 678                      | ThyssenKrupp Camford Ltd., Newton Aycliff, Großbritannien                | GBP     | 25                                                 | 100,00                 | 25                                                     |
| 679                      | ThyssenKrupp Canada, Inc., Calgary/Alberta, Kanada                       | CAD     | 1.000                                              | 100,00                 | 651                                                    |
| 680                      | ThyssenKrupp (China) Ltd., Beijing, VR China                             | USD     | 200.000                                            | 100,00                 | 651                                                    |
| 681                      | ThyssenKrupp Finance Canada, Inc., Calgary/Alberta, Kanada               | CAD     | 1                                                  | 100,00                 | 651                                                    |
| 682                      | ThyssenKrupp Finance Nederland B.V., Krimpen aan den IJssel, Niederlande |         | 2.300                                              | 100,00                 | 651                                                    |
| 683                      | ThyssenKrupp Finance USA, Inc., Wilmington/Delaware, USA                 | USD     | 1                                                  | 100,00                 | 691                                                    |
| 684                      | ThyssenKrupp France S.A.S., Rueil-Malmaison, Frankreich                  |         | 116.149                                            | 100,00                 | 651                                                    |
| 685                      | ThyssenKrupp Intermediate U.K. Ltd., County Durham, Großbritannien       | GBP     | 28.145                                             | 100,00                 | 690                                                    |
| 686                      | ThyssenKrupp Italia S.p.A., Terni, Italien                               |         | 200.000                                            | 100,00                 | 651                                                    |
| 687                      | ThyssenKrupp Knowsley Ltd., Dundee, Großbritannien                       | GBP     | 25.610                                             | 100,00                 | 659                                                    |
| 688                      | ThyssenKrupp Nederland B.V., Roermond, Niederlande                       |         | 13.613                                             | 100,00                 | 651                                                    |
| 689                      | ThyssenKrupp Participations B.V., Veghel, Niederlande                    |         | 100                                                | 100,00                 | 651                                                    |
| 690                      | ThyssenKrupp UK Plc., County Durham, Großbritannien                      | GBP     | 76.145                                             | 100,00                 | 651 100,00 % <sup>3)</sup><br>648 0,00 % <sup>3)</sup> |
| 691                      | ThyssenKrupp USA, Inc., Troy/Michigan, USA                               | USD     | 247.989                                            | 100,00                 | 651                                                    |
| 692                      | Transit America Inc., Philadelphia/Pennsylvania, USA                     | USD     | 50.000                                             | 100,00                 | 668                                                    |
| <b>Business Services</b> |                                                                          |         |                                                    |                        |                                                        |
| 693                      | ThyssenKrupp Business Services GmbH, Essen                               |         | 25                                                 | 100,00                 | 651                                                    |
| <b>IT Services</b>       |                                                                          |         |                                                    |                        |                                                        |
| 694                      | ThyssenKrupp IT Services GmbH, Essen                                     |         | 25                                                 | 100,00                 | 659                                                    |
| <b>Real Estate</b>       |                                                                          |         |                                                    |                        |                                                        |
| 695                      | Hellweg Liegenschaften GmbH, Bochum                                      |         | 50                                                 | 94,00                  | 697                                                    |
| 696                      | Immoever Gesellschaft für Grundstücksverwaltung mbH, Essen               |         | 4.602                                              | 100,00                 | 710                                                    |

<sup>1)</sup> Jahresabschluss nicht 30.09. <sup>2)</sup> nach IFRS Vorschriften einbezogen <sup>3)</sup> Splitteranteil ab der 4. Kommastelle <sup>4)</sup> Konzernmutter



**VOLL KONSOLIDIERTE TOCHTERUNTERNEHMEN (Stand 30. September 2010)**

| Laufende<br>Nummer | Name und Sitz                                                                      | Währung | Gesellschafts-<br>kapital in<br>1.000 € bzw.<br>Fremdwährung | Anteil am<br>Kapital in % | gehalten über<br>laufende Nummer |
|--------------------|------------------------------------------------------------------------------------|---------|--------------------------------------------------------------|---------------------------|----------------------------------|
| 697                | Krupp Hoesch Stahl GmbH, Dortmund                                                  |         | 181.510                                                      | 100,00                    | 651                              |
| 698                | Liegenschaftsgesellschaft Lintorf mbH, Düsseldorf                                  |         | 25                                                           | 94,00                     | 648                              |
| 699                | Stahlhauser Liegenschaften Verwaltungsgesellschaft mbH, Essen                      |         | 25                                                           | 94,00                     | 710 88,00 %<br>651 6,00 %        |
| 700                | Thyssen Liegenschaften Verwaltungs- und Verwertungs GmbH & Co. KG Industrie, Essen |         | 692                                                          | 100,00                    | 659 94,90 %<br>696 5,10 %        |
| 701                | Thyssen Liegenschaften Verwaltungs- und Verwertungs GmbH & Co. KG Stahl, Essen     |         | 511                                                          | 100,00                    | 648 94,90 %<br>696 5,10 %        |
| 702                | ThyssenKrupp ExperSite GmbH, Kassel                                                |         | 26                                                           | 100,00                    | 139                              |
| 703                | ThyssenKrupp Grundbesitz Verwaltungs GmbH, Essen                                   |         | 25                                                           | 100,00                    | 651                              |
| 704                | ThyssenKrupp Grundbesitz-Vermietungs GmbH & Co. KG, Essen                          |         | 1.000                                                        | 100,00                    | 651                              |
| 705                | ThyssenKrupp Immobilien Verwaltungs GmbH & Co. KG Krupp Hoesch Stahl, Essen        |         | 1.000                                                        | 100,00                    | 697                              |
| 706                | ThyssenKrupp Immobilien Verwaltungs GmbH & Co. KG Stahl, Essen                     |         | 1.000                                                        | 100,00                    | 701                              |
| 707                | ThyssenKrupp Immobilienentwicklungs Concordiahütte GmbH, Oberhausen                |         | 25                                                           | 100,00                    | 659 94,80 %<br>651 5,20 %        |
| 708                | ThyssenKrupp Immobilienentwicklungs Krefeld GmbH, Oberhausen                       |         | 25                                                           | 100,00                    | 648                              |
| 709                | ThyssenKrupp Liegenschaften Umformtechnik Verwaltungs GmbH, Essen                  |         | 25                                                           | 100,00                    | 659 94,80 %<br>651 5,20 %        |
| 710                | ThyssenKrupp Real Estate GmbH, Essen                                               |         | 15.441                                                       | 100,00                    | 651                              |
| 711                | ThyssenKrupp Stahl Immobilien GmbH, Duisburg                                       |         | 50                                                           | 100,00                    | 4 94,90 %<br>651 5,10 %          |
| 712                | Vermögensverwaltungsgesellschaft S + S mbH, Grünwald                               |         | 2.557                                                        | 100,00                    | 710 51,00 %<br>651 49,00 %       |
| 713                | Kappel Immobilien AG in Liq., Kappel, Schweiz                                      | CHF     | 3.100                                                        | 100,00                    | 651                              |
| 714                | Rhenus Immobilien Gesellschaft m.b.H., Wien, Österreich                            |         | 70                                                           | 100,00                    | 669                              |

<sup>1)</sup> Jahresabschluss nicht 30.09. <sup>2)</sup> nach IFRS Vorschriften einbezogen <sup>3)</sup> Splitteranteil ab der 4. Kommastelle <sup>4)</sup> Konzernmutter



## NICHT KONSOLIDIERTE TOCHTERUNTERNEHMEN (Stand 30. September 2010)

| Laufende Nummer                                     | Name und Sitz                                                                                    | Währung | Gesellschafts-kapital in 1.000 € bzw. Fremdwährung | Anteil am Kapital in % | gehalten über laufende Nummer |
|-----------------------------------------------------|--------------------------------------------------------------------------------------------------|---------|----------------------------------------------------|------------------------|-------------------------------|
| <b>STEEL AMERICAS</b>                               |                                                                                                  |         |                                                    |                        |                               |
| <b>CSA</b>                                          |                                                                                                  |         |                                                    |                        |                               |
| 715                                                 | CTA Termoeletrica do Atlântico Ltda., Rio de Janeiro, Brasilien                                  | BRL     | 10                                                 | 99,00                  | 75                            |
| <b>STAINLESS GLOBAL</b>                             |                                                                                                  |         |                                                    |                        |                               |
| <b>ThyssenKrupp Acciai Speciali Terni (I)</b>       |                                                                                                  |         |                                                    |                        |                               |
| 716                                                 | Terni - Società per l'Industria e l'Elettricità s.r.l., Terni, Italien                           |         | 10                                                 | 100,00                 | 89                            |
| <b>ThyssenKrupp VDM</b>                             |                                                                                                  |         |                                                    |                        |                               |
| 717                                                 | VDM-Unterstützungskasse GmbH, Werdohl                                                            |         | 26                                                 | 100,00                 | 98                            |
| <b>MATERIALS SERVICES</b>                           |                                                                                                  |         |                                                    |                        |                               |
| <b>MetalsServices</b>                               |                                                                                                  |         |                                                    |                        |                               |
| 718                                                 | OST-PLUS s.r.o., Teplice, Tschechische Republik                                                  | CZK     | 1.000 <sup>1)</sup>                                | 90,00                  | 127                           |
| 719                                                 | ThyssenKrupp HiServ s.r.o., Kosice, Slowakische Republik                                         |         | 7 <sup>1)</sup>                                    | 100,00                 | 142                           |
| <b>SpecialServices</b>                              |                                                                                                  |         |                                                    |                        |                               |
| 720                                                 | DvB Aufbereitungs-GmbH zur Behandlung von Metallprodukten, Duisburg                              |         | 102 <sup>1)</sup>                                  | 100,00                 | 217                           |
| <b>IndustrialServices</b>                           |                                                                                                  |         |                                                    |                        |                               |
| 721                                                 | ThyssenKrupp Xervon Dubai (L.L.C.), Dubai, Vereinigte Arabische Emirate                          | AED     | 300                                                | 100,00                 | 277                           |
| <b>ELEVATOR TECHNOLOGY</b>                          |                                                                                                  |         |                                                    |                        |                               |
| <b>Southern Europe/Africa/Middle East (SEAME)</b>   |                                                                                                  |         |                                                    |                        |                               |
| 722                                                 | ThyssenKrupp Elevator (Management) Ltd., Rishon Le'zion, Israel                                  | ILS     |                                                    | 100,00                 | 285 50,00 %                   |
|                                                     |                                                                                                  |         |                                                    |                        | 366 50,00 %                   |
| <b>PLANT TECHNOLOGY</b>                             |                                                                                                  |         |                                                    |                        |                               |
| <b>Uhde</b>                                         |                                                                                                  |         |                                                    |                        |                               |
| 723                                                 | Edeleanu SDN. BHD., Kuala Lumpur, Malaysia                                                       | MYR     | 1.000                                              | 100,00                 | 445                           |
| 724                                                 | Uhde do Brasil Ltda., São Paulo, Brasilien                                                       | BRL     | 798                                                | 100,00                 | 445                           |
| 725                                                 | Uhde Edeleanu s.r.o., Brno, Tschechische Republik                                                | CZK     | 1.000 <sup>1)</sup>                                | 100,00                 | 445                           |
| 726                                                 | Uhde Inventa-Fischer Chemical Fiber Equipment (Shanghai) Ltd., Shanghai, VR China                | USD     | 200 <sup>1)</sup>                                  | 100,00                 | 680                           |
| <b>Polysius</b>                                     |                                                                                                  |         |                                                    |                        |                               |
| 727                                                 | Polysius Wohnungsbau GmbH, Münster                                                               | DEM     | 200                                                | 100,00                 | 466                           |
| 728                                                 | Polysius-Hilfe GmbH, Münster                                                                     | DEM     | 50                                                 | 100,00                 | 466                           |
| 729                                                 | Maerz Ofenbau SRL, Timisoara, Rumänien                                                           | RON     | 204 <sup>1)</sup>                                  | 100,00                 | 469                           |
| <b>System Engineering</b>                           |                                                                                                  |         |                                                    |                        |                               |
| 730                                                 | ThyssenKrupp System Engineering S.r.l., Turin, Italien                                           |         | 120                                                | 100,00                 | 686 98,00 %                   |
|                                                     |                                                                                                  |         |                                                    |                        | 506 2,00 %                    |
| <b>Sonstige Beteiligungen Plant Technology</b>      |                                                                                                  |         |                                                    |                        |                               |
| 731                                                 | Thyssen TPS Vermögensverwaltungs GmbH, Essen                                                     |         | 26                                                 | 100,00                 | 659                           |
| 732                                                 | ThyssenKrupp Industries (Thailand) Ltd., Bangkok, Thailand                                       | THB     | 1.000                                              | 100,00                 | 659                           |
| <b>COMPONENTS TECHNOLOGY</b>                        |                                                                                                  |         |                                                    |                        |                               |
| <b>Rothe Erde</b>                                   |                                                                                                  |         |                                                    |                        |                               |
| 733                                                 | Roballo France S.A.R.L., Rueil-Malmaison, Frankreich                                             |         | 180                                                | 100,00                 | 684                           |
| <b>Sonstige Beteiligungen Components Technology</b> |                                                                                                  |         |                                                    |                        |                               |
| 734                                                 | ThyssenKrupp Automotive Italia S.r.l., Turin, Italien                                            |         | 99                                                 | 100,00                 | 659 99,00 %                   |
|                                                     |                                                                                                  |         |                                                    |                        | 576 1,00 %                    |
| <b>MARINE SYSTEMS</b>                               |                                                                                                  |         |                                                    |                        |                               |
| <b>Naval</b>                                        |                                                                                                  |         |                                                    |                        |                               |
| 735                                                 | Maritime Services Consultant Enterprise Sdn.Bhd., Petaling Jaya, Malaysia                        | MYR     | 300                                                | 100,00                 | 626                           |
| 736                                                 | ThyssenKrupp Marine Systems Australia Pty Ltd, Canberra/Australian Capital Territory, Australien | AUD     | 101                                                | 100,00                 | 626                           |
| 737                                                 | United Stirling, Malmö, Schweden                                                                 | SEK     | 100                                                | 100,00                 | 618                           |
| <b>Sonstige Beteiligungen Marine Systems</b>        |                                                                                                  |         |                                                    |                        |                               |
| 738                                                 | ThyssenKrupp Technologies HELLAS Marketing Services S.A., Athen, Griechenland                    |         | 60                                                 | 100,00                 | 659 99,98 %                   |
|                                                     |                                                                                                  |         |                                                    |                        | 633 0,02 %                    |
| <b>CORPORATE</b>                                    |                                                                                                  |         |                                                    |                        |                               |
| <b>Corporate Headquarters</b>                       |                                                                                                  |         |                                                    |                        |                               |
| 739                                                 | Thyssen Stahlunion Holdings Ltd., Smethwick, Großbritannien                                      | GBP     | 0                                                  | 100,00                 | 690                           |

<sup>1)</sup> Jahresabschluss nicht 30.09. <sup>2)</sup> nach IFRS Vorschriften einbezogen <sup>3)</sup> Splitteranteil ab der 4. Kommastelle <sup>4)</sup> Konzernmutter



## AT EQUITY BEWERTETE BETEILIGUNGEN (\*=Joint Venture / Stand 30.September 2010)

| Laufende Nummer                               | Name und Sitz                                                                        | Währung | Gesellschafts-kapital in 1.000 € bzw. Fremdwährung | Anteil am Kapital in % | gehalten über laufende Nummer |
|-----------------------------------------------|--------------------------------------------------------------------------------------|---------|----------------------------------------------------|------------------------|-------------------------------|
| <b>STEEL EUROPE</b>                           |                                                                                      |         |                                                    |                        |                               |
| <b>ThyssenKrupp Steel Europe</b>              |                                                                                      |         |                                                    |                        |                               |
| 740                                           | Hüttenwerke Krupp Mannesmann GmbH, Duisburg*                                         |         | 103.000 <sup>1)</sup>                              | 50,00                  | 4                             |
| 741                                           | ANSC-TKS Galvanizing Co., Ltd., Dalian, Liaoning Province, VR China*                 | CNY     | 1.065.806 <sup>1)</sup>                            | 50,00                  | 4                             |
| <b>Processing</b>                             |                                                                                      |         |                                                    |                        |                               |
| 742                                           | Kreislaufsystem Blechverpackungen Stahl GmbH (KBS), Düsseldorf                       |         | 385 <sup>1)</sup>                                  | 40,00                  | 10                            |
| 743                                           | SUNSCAPE ISOCAB NEW BUILDING MATERIALS LIMITED, Rizhao City, VR China                | USD     | 11.960 <sup>1)</sup>                               | 27,50                  | 21                            |
| 744                                           | TKAS (Changchun) Steel Service Center Ltd., Changchun, VR China*                     | USD     | 12.000 <sup>1)</sup>                               | 50,00                  | 680                           |
| <b>Other Companies Steel Europe</b>           |                                                                                      |         |                                                    |                        |                               |
| 745                                           | Walzen-Service-Center GmbH, Oberhausen*                                              |         | 1.023                                              | 50,00                  | 4                             |
| 746                                           | Acciai di Qualità, Centro Lavorazione Lamiere S.p.A., Geonova, Italien               |         | 1.731 <sup>1)</sup>                                | 24,90                  | 686                           |
| 747                                           | RKE N.V., Antwerpen, Belgien                                                         |         | 645 <sup>1)</sup>                                  | 38,54                  | 4                             |
| 748                                           | Transport- en Handelsmaatschappij 'Steenkolen Utrecht' B.V., Rotterdam, Niederlande* |         | 8.204 <sup>1)</sup>                                | 50,00                  | 73                            |
| <b>STAINLESS GLOBAL</b>                       |                                                                                      |         |                                                    |                        |                               |
| <b>ThyssenKrupp Acciai Speciali Terni (I)</b> |                                                                                      |         |                                                    |                        |                               |
| 749                                           | Euroacciai S.r.l., Sarezzo (BS), Italien                                             |         | 1.500 <sup>1)</sup>                                | 30,23                  | 89                            |
| 750                                           | Ilserv S.r.l., Terni, Italien                                                        |         | 1.924 <sup>1)</sup>                                | 35,00                  | 89                            |
| 751                                           | Terni Frantumati S.p.A., Terni, Italien                                              |         | 930 <sup>1)</sup>                                  | 21,00                  | 89                            |
| <b>ThyssenKrupp Mexinox (MX)</b>              |                                                                                      |         |                                                    |                        |                               |
| 752                                           | Fischer Mexicana S.A. de C.V., Puebla, Mexico*                                       | MXN     | 108.544 <sup>1)</sup>                              | 50,00                  | 95                            |
| <b>MATERIALS SERVICES</b>                     |                                                                                      |         |                                                    |                        |                               |
| <b>MetalsServices</b>                         |                                                                                      |         |                                                    |                        |                               |
| 753                                           | Aceros de America Inc., San Juan, Puerto Rico*                                       | USD     | 1.000                                              | 50,00                  | 134                           |
| 754                                           | Ferona Thyssen Plastics, s.r.o., Velká Bystrice, Olomouc, Tschechische Republik*     | CZK     | 16.000 <sup>1)</sup>                               | 50,00                  | 142                           |
| 755                                           | Leong Jin Corporation Pte. Ltd., Singapur, Singapur                                  | SGD     | 20.000 <sup>1)</sup>                               | 30,00                  | 142                           |
| 756                                           | Polarputki Oy, Helsinki, Finnland*                                                   |         | 1.009 <sup>1)</sup>                                | 50,00                  | 142                           |
| 757                                           | Thyssen Ros Casares S.A., Valencia, Spanien*                                         |         | 5.000                                              | 50,00                  | 147                           |
| <b>SpecialServices</b>                        |                                                                                      |         |                                                    |                        |                               |
| 758                                           | Brouwer Shipping & Chartering GmbH, Hamburg                                          |         | 100 <sup>1)</sup>                                  | 30,00                  | 218                           |
| 759                                           | TGHM GmbH & Co. KG, Dortmund*                                                        |         | 511 <sup>1)</sup>                                  | 50,00                  | 651                           |
| 760                                           | BCCW (Tangshan) Jiahua Coking & Chemical Co., Ltd., Tangshan, VR China               | CNY     | 1.130.000 <sup>1)</sup>                            | 25,00                  | 218                           |
| 761                                           | MRT Track & Services Co., Inc., New Jersey, USA*                                     | USD     | 100                                                | 50,00                  | 214                           |
| 762                                           | OOO Bel GfT Bautechnik, Minsk / Smolewitschi, Weißrußland                            | USD     | 21 <sup>1)</sup>                                   | 25,00                  | 213                           |
| <b>ELEVATOR TECHNOLOGY</b>                    |                                                                                      |         |                                                    |                        |                               |
| <b>Americas (AMS)</b>                         |                                                                                      |         |                                                    |                        |                               |
| 763                                           | Braun ThyssenKrupp Elevator LLC, Madison/Wisconsin, USA*                             | USD     | 1.000 <sup>1)</sup>                                | 50,00                  | 389                           |
| <b>PLANT TECHNOLOGY</b>                       |                                                                                      |         |                                                    |                        |                               |
| <b>Uhde</b>                                   |                                                                                      |         |                                                    |                        |                               |
| 764                                           | Uhdenora S.p.A., Milan, Italien*                                                     |         | 3.600                                              | 50,00                  | 445                           |
| <b>System Engineering</b>                     |                                                                                      |         |                                                    |                        |                               |
| 765                                           | HFS Hotforming Solutions GmbH, Schwalbach*                                           |         | 200                                                | 50,00                  | 508                           |
| <b>COMPONENTS TECHNOLOGY</b>                  |                                                                                      |         |                                                    |                        |                               |
| <b>Forging-Group</b>                          |                                                                                      |         |                                                    |                        |                               |
| 766                                           | Huizhou Sumikin Forging Company Ltd., Huizhou, VR China*                             | USD     | 29.680 <sup>1)</sup>                               | 34,00                  | 680                           |
| <b>MARINE SYSTEMS</b>                         |                                                                                      |         |                                                    |                        |                               |
| <b>Naval</b>                                  |                                                                                      |         |                                                    |                        |                               |
| 767                                           | Atlas Elektronik GmbH, Bremen*                                                       |         | 31.240 <sup>1)</sup>                               | 51,00                  | 659                           |
| 768                                           | MARLOG Marine Logistik GmbH & Co. KG, Kiel*                                          |         | 1.500 <sup>1)</sup>                                | 50,00                  | 610                           |
| 769                                           | MarineForce International LLP, London, Großbritannien*                               | GBP     | 693 <sup>1)</sup>                                  | 50,00                  | 610                           |
| <b>CORPORATE</b>                              |                                                                                      |         |                                                    |                        |                               |
| <b>Real Estate</b>                            |                                                                                      |         |                                                    |                        |                               |
| 770                                           | COMUNITHY Immobilien GmbH, Düsseldorf                                                |         | 100 <sup>1)</sup>                                  | 49,00                  | 710                           |

<sup>1)</sup> Jahresabschluss nicht 30.09. <sup>2)</sup> nach IFRS Vorschriften einbezogen <sup>3)</sup> Splitteranteil ab der 4. Kommastelle <sup>4)</sup> Konzernmutter



## SONSTIGE ASSOZIIERTE BETEILIGUNGEN (\*=Joint Venture / Stand 30.September 2010)

| Laufende Nummer                              | Name und Sitz                                                                          | Währung | Gesellschafts-kapital in 1.000 € bzw. Fremdwährung | Anteil am Kapital in % | gehalten über laufende Nummer |
|----------------------------------------------|----------------------------------------------------------------------------------------|---------|----------------------------------------------------|------------------------|-------------------------------|
| <b>STEEL EUROPE</b>                          |                                                                                        |         |                                                    |                        |                               |
| <b>ThyssenKrupp Steel Europe</b>             |                                                                                        |         |                                                    |                        |                               |
| 771                                          | JEVISE Corporation, Tokyo, Japan*                                                      | JPY     | 10.000 <sup>1)</sup>                               | 50,00                  | 4                             |
| <b>STAINLESS GLOBAL</b>                      |                                                                                        |         |                                                    |                        |                               |
| <b>ThyssenKrupp VDM</b>                      |                                                                                        |         |                                                    |                        |                               |
| 772                                          | MOL Katalysatortechnik GmbH, Merseburg                                                 |         | 77 <sup>1)</sup>                                   | 20,46                  | 98                            |
| <b>MATERIALS SERVICES</b>                    |                                                                                        |         |                                                    |                        |                               |
| <b>MetalsServices</b>                        |                                                                                        |         |                                                    |                        |                               |
| 773                                          | Indo German International Private Ltd., New Delhi, Indien                              | INR     | 38.975 <sup>1)</sup>                               | 50,00                  | 141                           |
| 774                                          | Sidecontrol S.L., Gandia, Spanien                                                      |         | 36 <sup>1)</sup>                                   | 50,00                  | 155                           |
| <b>SpecialServices</b>                       |                                                                                        |         |                                                    |                        |                               |
| 775                                          | SIB Schell Industrieanlagen-Bau GmbH, Duisburg                                         |         | 102                                                | 50,00                  | 217                           |
| 776                                          | Solid Slab Track GmbH, Görschen                                                        |         | 100                                                | 49,00                  | 214                           |
| 777                                          | TGHM Verwaltungsgesellschaft mbH, Dortmund                                             | DEM     | 50 <sup>1)</sup>                                   | 50,00                  | 651                           |
| <b>PLANT TECHNOLOGY</b>                      |                                                                                        |         |                                                    |                        |                               |
| <b>Uhde</b>                                  |                                                                                        |         |                                                    |                        |                               |
| 778                                          | Shedden (Malaysia) Sdn. Bhd., Petaling Jaya, Malaysia                                  | MYR     | 2.285 <sup>1)</sup>                                | 40,00                  | 464                           |
| <b>Polysius</b>                              |                                                                                        |         |                                                    |                        |                               |
| 779                                          | PAN Grundstücksverwaltung GmbH, Mainz                                                  |         | 26 <sup>1)</sup>                                   | 26,00                  | 727                           |
| <b>Transrapid</b>                            |                                                                                        |         |                                                    |                        |                               |
| 780                                          | Transrapid International Verwaltungsgesellschaft mbH, i. L., Berlin                    |         | 80                                                 | 50,00                  | 519                           |
| <b>COMPONENTS TECHNOLOGY</b>                 |                                                                                        |         |                                                    |                        |                               |
| <b>Bilstein-Gruppe</b>                       |                                                                                        |         |                                                    |                        |                               |
| 781                                          | ABC Sistemas e Módulos Ltda., São Paulo, Brasilien                                     | BRL     | 600                                                | 33,33                  | 596                           |
| <b>MARINE SYSTEMS</b>                        |                                                                                        |         |                                                    |                        |                               |
| <b>Naval</b>                                 |                                                                                        |         |                                                    |                        |                               |
| 782                                          | Marlog Verwaltungsgesellschaft mbH, Kiel                                               |         | 25 <sup>1)</sup>                                   | 50,00                  | 610                           |
| 783                                          | MS "MARITIM FRANKFURT" Schiffahrtskontor "MARITIM" GmbH & Co. KG, Kiel                 |         | 1.218 <sup>1)</sup>                                | 42,09                  | 610                           |
| 784                                          | MS "MARITIM KIEL" Schiffahrtskontor "MARITIM" GmbH & Co. KG, Kiel                      |         | 1.335 <sup>1)</sup>                                | 33,33                  | 610                           |
| 785                                          | MTG Marinetechnik GmbH, Hamburg                                                        |         | 3.068 <sup>1)</sup>                                | 49,00                  | 608                           |
|                                              |                                                                                        |         |                                                    |                        | 20,00 %                       |
|                                              |                                                                                        |         |                                                    |                        | 610                           |
|                                              |                                                                                        |         |                                                    |                        | 19,00 %                       |
|                                              |                                                                                        |         |                                                    |                        | 767                           |
|                                              |                                                                                        |         |                                                    |                        | 10,00 %                       |
| <b>Shipyards and Services</b>                |                                                                                        |         |                                                    |                        |                               |
| 786                                          | Bollfilter Japan Ltd., Kobe, Japan                                                     | JPY     | 10.000                                             | 25,00                  | 623                           |
| 787                                          | Simplex Turbulo Company Ltd., Wherwell, Großbritannien                                 | GBP     | 6                                                  | 25,10                  | 623                           |
| <b>Sonstige Beteiligungen Marine Systems</b> |                                                                                        |         |                                                    |                        |                               |
| 788                                          | LISNAVE-ESTALEIROS NAVAIS S.A., Lissabon, Portugal                                     |         | 5.000 <sup>1)</sup>                                | 20,00                  | 633                           |
| <b>CORPORATE</b>                             |                                                                                        |         |                                                    |                        |                               |
| <b>Corporate Headquarters</b>                |                                                                                        |         |                                                    |                        |                               |
| 789                                          | Grundstücksgesellschaft Schlossplatz 1 mbH & Co. KG, Berlin                            |         | 12.250 <sup>1)</sup>                               | 18,37                  | 651                           |
| <b>Real Estate</b>                           |                                                                                        |         |                                                    |                        |                               |
| 790                                          | Gewerkschaft Hermann V GmbH, Essen                                                     |         | 26                                                 | 33,33                  | 697                           |
| 791                                          | NORA Grundstücks-Vermietungsgesellschaft mbH & Co. Objekt Gelsenkirchen KG, Düsseldorf |         | 10 <sup>1)</sup>                                   | 94,76                  | 700                           |
| 792                                          | Wohnpark Duisburg Biegerhof GmbH, Düsseldorf                                           |         | 50                                                 | 50,00                  | 696                           |

<sup>1)</sup> Jahresabschluss nicht 30.09. <sup>2)</sup> nach IFRS Vorschriften einbezogen <sup>3)</sup> Splitteranteil ab der 4. Kommastelle <sup>4)</sup> Konzernmutter



ANDERE BETEILIGUNGSUNTERNEHMEN (Stand 30. September 2010)

| Laufende<br>Nummer | Name und Sitz                     | Währung | Gesellschafts-<br>kapital in | Anteil am<br>Kapital in % | gehalten über<br>laufende Nummer |
|--------------------|-----------------------------------|---------|------------------------------|---------------------------|----------------------------------|
|                    |                                   |         | 1.000 € bzw.<br>Fremdwährung |                           |                                  |
| CORPORATE          |                                   |         |                              |                           |                                  |
| Real Estate        |                                   |         |                              |                           |                                  |
| 793                | VBW Bauen und Wohnen GmbH, Bochum |         | 12.858                       | 13,06                     |                                  |
|                    | Eigenkapital                      |         | 69.238                       |                           |                                  |
|                    | Jahresergebnis                    |         | 5.922                        |                           |                                  |

<sup>1)</sup> Jahresabschluss nicht 30.09. <sup>2)</sup> nach IFRS Vorschriften einbezogen <sup>3)</sup> Splitteranteil ab der 4. Kommastelle <sup>4)</sup> Konzernmutter



# Bestätigungsvermerk des Abschlussprüfers

Wir haben den von der ThyssenKrupp AG, Duisburg und Essen, aufgestellten Konzernabschluss – bestehend aus Konzern-Bilanz, Konzern-Gewinn- und Verlustrechnung, Konzern-Gesamtergebnisrechnung, Konzern-Eigenkapitalveränderungsrechnung, Konzern-Kapitalflussrechnung und Konzern-Anhang – sowie den Konzernlagebericht für das Geschäftsjahr vom 1. Oktober 2009 bis 30. September 2010 geprüft. Die Aufstellung von Konzernabschluss und Konzernlagebericht nach den IFRS, wie sie in der EU anzuwenden sind, und den ergänzend nach § 315a Abs. 1 HGB anzuwendenden handelsrechtlichen Vorschriften liegt in der Verantwortung des Vorstands der Gesellschaft. Unsere Aufgabe ist es, auf der Grundlage der von uns durchgeführten Prüfung eine Beurteilung über den Konzernabschluss und den Konzernlagebericht abzugeben.

Wir haben unsere Konzernabschlussprüfung nach § 317 HGB unter Beachtung der vom Institut der Wirtschaftsprüfer (IDW) festgestellten deutschen Grundsätze ordnungsmäßiger Abschlussprüfung sowie ergänzend unter Beachtung der International Standards on Auditing (ISA) vorgenommen. Danach ist die Prüfung so zu planen und durchzuführen, dass Unrichtigkeiten und Verstöße, die sich auf die Darstellung des durch den Konzernabschluss unter Beachtung der anzuwendenden Rechnungslegungsvorschriften und durch den Konzernlagebericht vermittelten Bildes der Vermögens-, Finanz- und Ertragslage wesentlich auswirken, mit hinreichender Sicherheit erkannt werden. Bei der Festlegung der Prüfungshandlungen werden die Kenntnisse über die Geschäftstätigkeit und über das wirtschaftliche und rechtliche Umfeld des Konzerns sowie die Erwartungen über mögliche Fehler berücksichtigt. Im Rahmen der Prüfung werden die Wirksamkeit des rechnungslegungsbezogenen internen Kontrollsystems sowie Nachweise für die Angaben im Konzernabschluss und Konzernlagebericht überwiegend auf der Basis von Stichproben beurteilt. Die Prüfung umfasst die Beurteilung der Jahresabschlüsse

der in den Konzernabschluss einbezogenen Unternehmen, der Abgrenzung des Konsolidierungskreises, der angewandten Bilanzierungs- und Konsolidierungsgrundsätze und der wesentlichen Einschätzungen des Vorstands sowie die Würdigung der Gesamtdarstellung des Konzernabschlusses und des Konzernlageberichts. Wir sind der Auffassung, dass unsere Prüfung eine hinreichend sichere Grundlage für unsere Beurteilung bildet.

Unsere Prüfung hat zu keinen Einwendungen geführt.

Nach unserer Beurteilung auf Grund der bei der Prüfung gewonnenen Erkenntnisse entspricht der Konzernabschluss den IFRS, wie sie in der EU anzuwenden sind, und den ergänzend nach § 315a Abs. 1 HGB anzuwendenden handelsrechtlichen Vorschriften und vermittelt unter Beachtung dieser Vorschriften ein den tatsächlichen Verhältnissen entsprechendes Bild der Vermögens-, Finanz- und Ertragslage des Konzerns. Der Konzernlagebericht steht in Einklang mit dem Konzernabschluss, vermittelt insgesamt ein zutreffendes Bild von der Lage des Konzerns und stellt die Chancen und Risiken der zukünftigen Entwicklung zutreffend dar.

Düsseldorf, den 8. November 2010

KPMG AG

Wirtschaftsprüfungsgesellschaft

Prof. Dr. Rolf Nonnenmacher  
Wirtschaftsprüfer

Michael Gewehr  
Wirtschaftsprüfer



# Versicherung der gesetzlichen Vertreter

Wir versichern nach bestem Wissen, dass gemäß den anzuwendenden Rechnungslegungsgrundsätzen der Konzernabschluss ein den tatsächlichen Verhältnissen entsprechendes Bild der Vermögens-, Finanz- und Ertragslage des Konzerns vermittelt und im Konzernlagebericht der Geschäftsverlauf einschließlich des Geschäftsergebnisses und die Lage des Konzerns so dargestellt sind, dass ein den tatsächlichen Verhältnissen entsprechendes Bild vermittelt wird, sowie die wesentlichen Chancen und Risiken der voraussichtlichen Entwicklung des Konzerns beschrieben sind.

Essen, 08. November 2010

ThyssenKrupp AG  
Der Vorstand

Schulz

Hiesinger

Berlien

Eichler

Hippe

Labonte



# Weitere Informationen

S. 281 – 294

# 04

Wie haben sich die wesentlichen Daten zu ThyssenKrupp in den letzten Jahren entwickelt, wann stehen in den nächsten zwölf Monaten wichtige Finanztermine an, welche Mandate nehmen Mitglieder von Vorstand und Aufsichtsrat wahr? All das erfahren Sie auf den nachfolgenden Seiten. Zudem stehen dort viele Lese- und Orientierungshilfen zu diesem Geschäftsbericht bereit. Und wenn noch Fragen offen bleiben, beantworten wir sie gerne persönlich: am schnellsten über „Kontakt“ auf [www.thyssenkrupp.com](http://www.thyssenkrupp.com)

## Inhalt

|     |                               |
|-----|-------------------------------|
| 285 | Mehrjahresübersicht           |
| 287 | Mandate des Vorstands         |
| 288 | Mandate des Aufsichtsrats     |
| 290 | Stichwortverzeichnis          |
| 292 | Glossar                       |
| 293 | Abkürzungsverzeichnis         |
| 294 | Kontakt / Termine 2011 / 2012 |



## ThyssenKrupp Steel USA und ThyssenKrupp Stainless USA, Calvert, Alabama, USA

Im Süden der USA siedeln sich traditionell anspruchsvolle Industrieunternehmen und deren Zulieferer an, die sich durch eine hohe Wertschöpfung auszeichnen. Entsprechend hoch ist der Anspruch der Menschen und Gemeinden an den Gemeinsinn von Unternehmen. ThyssenKrupp engagiert sich an vielen Stellen, unter anderem durch soziale Projekte und die Förderung von Universitäten.

*Förderung von beruflicher Bildung  
und persönlicher Entwicklung*

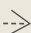

*Wirtschaftliche Stärkung  
der Region*

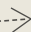

*Nutzung technologisch modernster  
Umweltschutzmaßnahmen und Einhaltung  
strengster Umweltstandards*

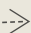

*Unterstützung von Kommunen  
und Gemeinwesen*

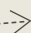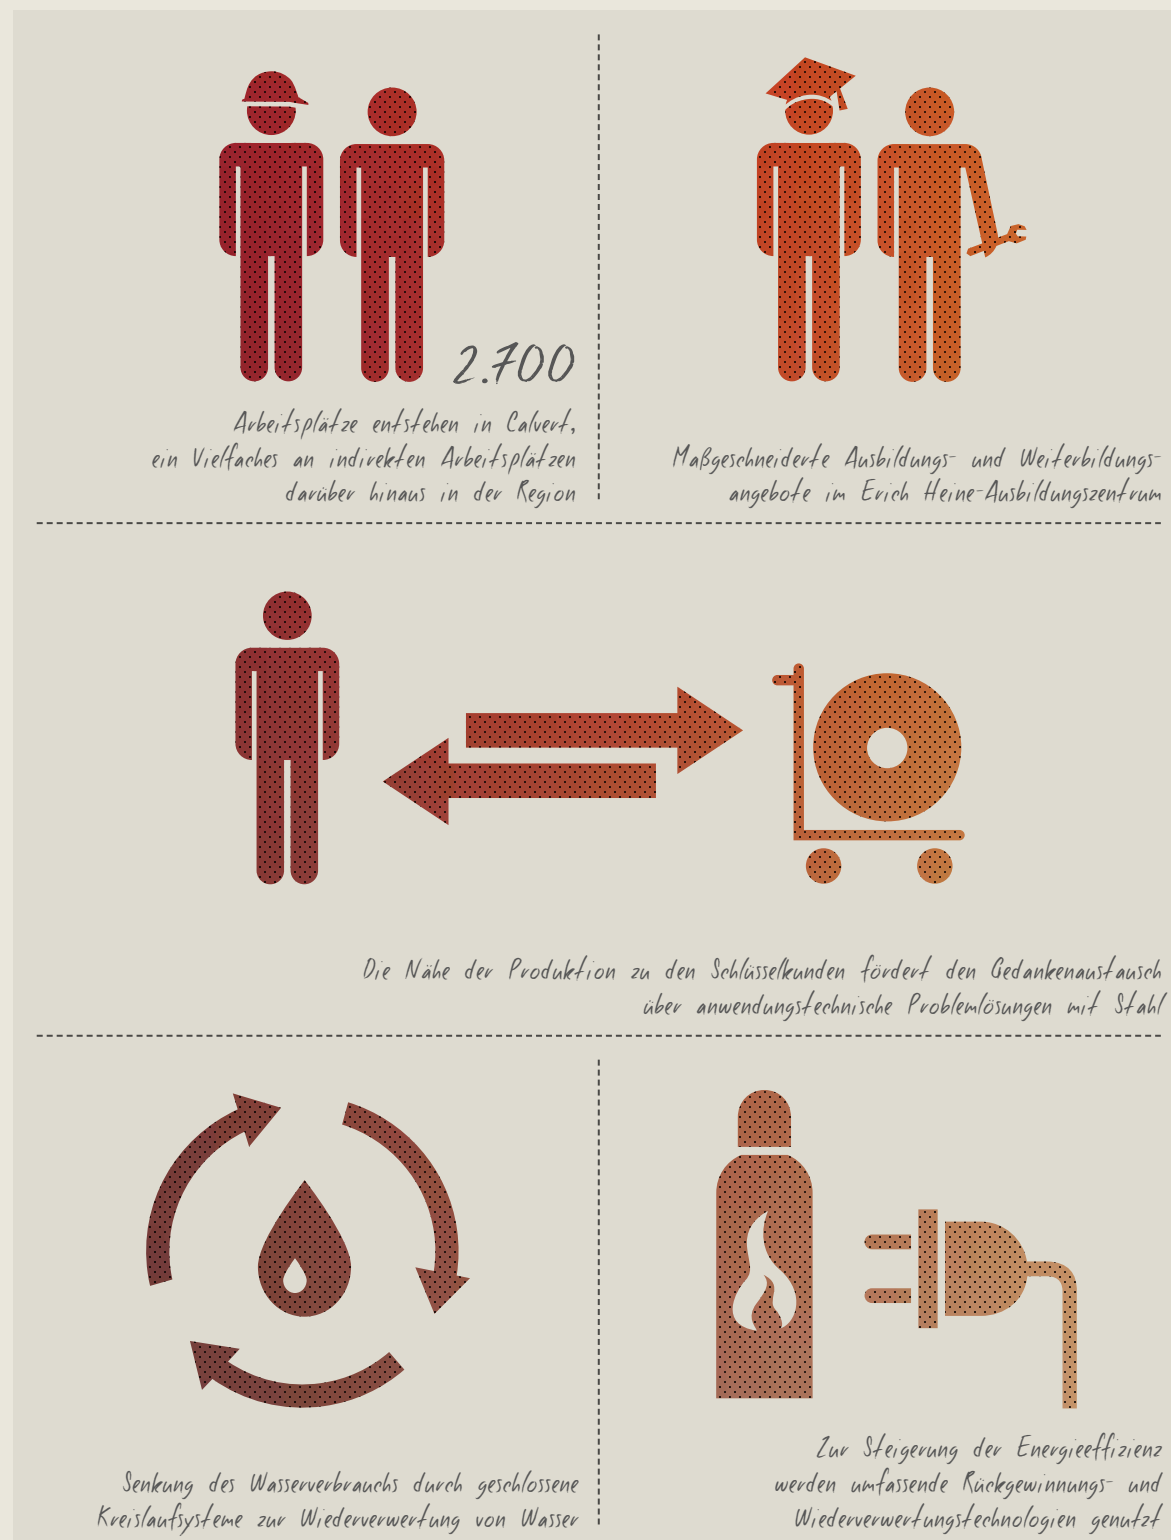

**Impulse  
geben**

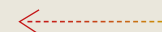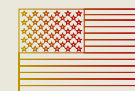



## THYSSENKRUPP KONZERN

|                                                           |       |           |           |           |           |           | 2009/2010 zu 2008/2009 |               |
|-----------------------------------------------------------|-------|-----------|-----------|-----------|-----------|-----------|------------------------|---------------|
|                                                           |       | 2005/2006 | 2006/2007 | 2007/2008 | 2008/2009 | 2009/2010 | Veränderung            | Veränderung % |
| <b>Ertragslage</b>                                        |       |           |           |           |           |           |                        |               |
| Umsatz                                                    | Mio € | 47.125    | 51.723    | 53.426    | 40.563    | 42.621    | 2.058                  | 5             |
| Bruttoergebnis vom Umsatz                                 | Mio € | 7.983     | 9.432     | 9.156     | 3.658     | 6.362     | 2.704                  | 74            |
| EBITDA                                                    | Mio € | 4.700     | 5.254     | 4.976     | 192       | 3.224     | 3.032                  | —             |
| EBIT                                                      | Mio € | 3.044     | 3.728     | 3.572     | – 1.663   | 1.787     | 3.450                  | —             |
| EBT                                                       | Mio € | 2.623     | 3.330     | 3.128     | – 2.364   | 1.135     | 3.499                  | —             |
| Jahresüberschuss/-fehlbetrag                              | Mio € | 1.704     | 2.190     | 2.276     | – 1.873   | 927       | 2.800                  | —             |
| Ergebnis je Aktie                                         | €     | 3,24      | 4,30      | 4,59      | – 4,01    | 1,77      | 5,78                   | —             |
| Gross Margin                                              | %     | 16,9      | 18,2      | 17,1      | 9,0       | 14,9      | 5,9                    | 66            |
| EBITDA-Marge                                              | %     | 10,0      | 10,2      | 9,3       | 0,5       | 7,6       | 7,1                    | —             |
| EBIT-Marge                                                | %     | 6,5       | 7,2       | 6,7       | – 4,1     | 4,2       | 8,3                    | —             |
| EBT-Marge                                                 | %     | 5,6       | 6,4       | 5,9       | – 5,8     | 2,7       | 8,5                    | —             |
| Eigenkapitalrentabilität (vor Steuern)                    | %     | 29,4      | 31,9      | 27,2      | – 24,4    | 10,9      | 35,3                   | —             |
| Personalaufwand je Mitarbeiter                            | €     | 50.377    | 48.988    | 49.212    | 50.120    | 49.605    | – 515                  | – 1           |
| Umsatz je Mitarbeiter                                     | €     | 252.609   | 275.146   | 272.824   | 210.587   | 241.017   | 30.430                 | 14            |
| <b>Vermögensstruktur</b>                                  |       |           |           |           |           |           |                        |               |
| Langfristige Vermögenswerte                               | Mio € | 15.054    | 15.385    | 18.308    | 20.725    | 22.953    | 2.228                  | 11            |
| Kurzfristige Vermögenswerte                               | Mio € | 21.408    | 22.689    | 23.334    | 20.642    | 20.759    | 117                    | 1             |
| Bilanzsumme                                               | Mio € | 36.462    | 38.074    | 41.642    | 41.367    | 43.712    | 2.345                  | 6             |
| Eigenkapital                                              | Mio € | 8.927     | 10.447    | 11.489    | 9.696     | 10.388    | 692                    | 7             |
| Fremdkapital                                              | Mio € | 27.535    | 27.627    | 30.153    | 31.671    | 33.324    | 1.653                  | 5             |
| Rückstellungen für Pensionen und ähnliche Verpflichtungen | Mio € | 8.111     | 7.139     | 6.550     | 7.537     | 8.211     | 674                    | 9             |
| Finanzschulden langfristig                                | Mio € | 2.946     | 2.813     | 3.068     | 7.160     | 6.163     | – 997                  | – 14          |
| Finanzschulden kurzfristig                                | Mio € | 858       | 825       | 1.348     | 444       | 1.298     | 854                    | —             |
| Finanzschulden kurz-/ langfristig                         | Mio € | 3.804     | 3.638     | 4.416     | 7.604     | 7.461     | – 143                  | – 2           |
| Verbindlichkeiten aus Lieferungen und Leistungen          | Mio € | 4.729     | 4.960     | 5.731     | 4.185     | 5.471     | 1.286                  | 31            |
| Eigenkapitalquote                                         | %     | 24,5      | 27,4      | 27,6      | 23,4      | 23,8      | 0,4                    | 2             |
| Gearing                                                   | %     | – 8,4     | – 2,1     | 13,8      | 21,2      | 36,4      | 15,2                   | 72            |
| Umschlagsdauer Vorräte                                    | Tage  | 62,2      | 61,7      | 64,0      | 60,0      | 70,3      | 10,3                   | 17            |
| Zahlungsziel Debitoren                                    | Tage  | 56,5      | 52,7      | 53,1      | 46,8      | 49,7      | 2,9                    | 6             |

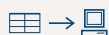

Download der Tabellen unter:  
[http://www.thyssenkrupp.com/financial-reports/09\\_10/de/](http://www.thyssenkrupp.com/financial-reports/09_10/de/)



**THYSSENKRUPP KONZERN**

|                                                    |       |           |           |           |           | 2009/2010 zu 2008/2009 |               |
|----------------------------------------------------|-------|-----------|-----------|-----------|-----------|------------------------|---------------|
|                                                    |       |           |           |           |           | Veränderung            | Veränderung % |
|                                                    |       | 2005/2006 | 2006/2007 | 2007/2008 | 2008/2009 | 2009/2010              |               |
| <b>Wertmanagement</b>                              |       |           |           |           |           |                        |               |
| Capital Employed (Durchschnitt)                    | Mio € | 17.056    | 18.000    | 19.478    | 20.662    | 20.590                 | - 72          |
| ROCE                                               | %     | 17,9      | 20,7      | 18,3      | - 8,1     | 8,7                    | 16,8          |
| Kapitalkostensatz                                  | %     | 9,0       | 9,0       | 8,5       | 8,5       | 8,5                    | 0,0           |
| TKVA                                               | Mio € | 1.510     | 2.108     | 1.916     | - 3.419   | 37                     | 3.456         |
| <b>Cash-Flow/Investitionen</b>                     |       |           |           |           |           |                        |               |
| Operating Cash-Flow                                | Mio € | 3.467     | 2.220     | 3.679     | 3.699     | 868                    | - 2.831       |
| Cash-Flow aus Desinvestitionen                     | Mio € | 344       | 673       | 329       | 199       | 552                    | 353           |
| Cash-Flow für Investitionen <sup>1)</sup>          | Mio € | - 2.040   | - 2.997   | - 4.227   | - 4.077   | - 3.510                | 567           |
| Free Cash-Flow <sup>1)</sup>                       | Mio € | 1.771     | - 104     | - 219     | - 179     | - 2.090                | - 1.911       |
| Cash-Flow aus Finanzierungstätigkeit <sup>1)</sup> | Mio € | - 2.012   | - 670     | - 705     | 2.824     | 255                    | - 2.569       |
| Investitionen <sup>1) 2)</sup>                     | Mio € | 2.077     | 3.001     | 4.282     | 4.079     | 3.513                  | - 566         |
| Liquide Mittel                                     | Mio € | 4.551     | 3.861     | 2.832     | 5.545     | 3.681                  | - 1.864       |
| Netto-Finanzschulden (+)/-guthaben (-)             | Mio € | - 747     | - 223     | 1.584     | 2.059     | 3.780                  | 1.721         |
| Innenfinanzierungskraft                            |       | 2,0       | 1,0       | 0,9       | 1,0       | 0,3                    | - 0,7         |
| Dynamischer Verschuldungsgrad                      |       | —         | —         | 0,4       | 0,6       | 4,4                    | 3,8           |
| <b>ThyssenKrupp AG</b>                             |       |           |           |           |           |                        |               |
| Jahresüberschuss (+)/-fehlbetrag (-)               | Mio € | 1.118     | 309       | 1.175     | - 882     | 800                    | 1.682         |
| Ausschüttung                                       | Mio € | 489       | 635       | 603       | 139       | 209 <sup>3)</sup>      | 70            |
| Dividende je Aktie                                 | €     | 1,00      | 1,30      | 1,30      | 0,30      | 0,45 <sup>3)</sup>     | 0,15          |

<sup>1)</sup> Die Vorjahreswerte wurden angepasst.<sup>2)</sup> Cash-Flow für Investitionen vor übernommenen Zahlungsmitteln und Zahlungsmitteläquivalenten aus dem Erwerb von konsolidierten Gesellschaften<sup>3)</sup> Vorschlag an die Hauptversammlung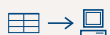

Download der Tabellen unter:

[http://www.thyssenkrupp.com/financial-reports/09\\_10/de/](http://www.thyssenkrupp.com/financial-reports/09_10/de/)



# Mandate des Vorstands

## Dr.-Ing. Ekkehard D. Schulz

Vorsitzender

- AXA Konzern AG
- Bayer AG \*
- MAN SE (stellv. Vorsitz) \*
- RWE AG \*

konzernintern:

- ThyssenKrupp Elevator AG (Vorsitz)
- ThyssenKrupp Steel Europe AG (Vorsitz)

## Dr. Olaf Berlien

konzernintern:

- ThyssenKrupp Marine Systems AG (Vorsitz)
- ThyssenKrupp (China) Ltd./VR China (Chairman)

## Edwin Eichler

- Heidelberger Druckmaschinen AG \*
- Hüttenwerke Krupp Mannesmann GmbH (stellv. Vorsitz)
- SGL Carbon SE \*
- ANSC-TKS Galvanizing Co., Ltd./VR China (Chairman)

konzernintern:

- ThyssenKrupp Materials International GmbH (Vorsitz)
- ThyssenKrupp Nirosta GmbH (Vorsitz)
- ThyssenKrupp Acciai Speciali Terni S.p.A./Italien (President)
- ThyssenKrupp Industries and Services Qatar LLC/Katar
- ThyssenKrupp Steel Americas, LLC/USA (Chairman)
- ThyssenKrupp Steel and Stainless USA, LLC/USA
- ThyssenKrupp Steel USA, LLC/USA

## Dr. Alan Hippe

- Voith AG

konzernintern:

- ThyssenKrupp Elevator AG
- ThyssenKrupp Nirosta GmbH
- ThyssenKrupp Reinsurance AG (Vorsitz)

## Ralph Labonte

- PEAG Personalentwicklungs- und Arbeitsmarktagentur GmbH (Vorsitz)

konzernintern:

- Polysius AG (stellv. Vorsitz)
- Rothe Erde GmbH
- ThyssenKrupp Bilstein Suspension GmbH
- ThyssenKrupp Elevator AG
- ThyssenKrupp Marine Systems AG
- ThyssenKrupp Materials International GmbH
- ThyssenKrupp Steel Europe AG
- Uhde GmbH (stellv. Vorsitz)
- ThyssenKrupp System Engineering GmbH

Mit Ablauf des 21. Januar 2010 ist Herr

**Dr. Ulrich Middelman** aus dem Vorstand ausgeschieden und in den Ruhestand getreten.

Folgende Mandate wurden zum Zeitpunkt des Ausscheidens wahrgenommen:

- Commerzbank AG \*
- Deutsche Telekom AG
- E.ON Ruhrgas AG
- LANXESS AG \*
- LANXESS Deutschland GmbH
- Hoberg & Driesch GmbH (Vorsitz)

konzernintern:

- ThyssenKrupp Elevator AG
- ThyssenKrupp Marine Systems AG
- ThyssenKrupp Materials International GmbH
- ThyssenKrupp Nirosta GmbH
- ThyssenKrupp Steel Europe AG
- ThyssenKrupp Acciai Speciali Terni S.p.A./Italien
- ThyssenKrupp (China) Ltd./VR China

\* Mitgliedschaft in gesetzlich zu bildenden Aufsichtsräten i. S. d. § 125 AktG (Stand: 30. September 2010)

\* konzernexterne börsennotierte Gesellschaft

\* Mitgliedschaft in vergleichbaren in- und ausländischen Kontrollgremien von Wirtschaftsunternehmen i. S. d. § 125 AktG (Stand: 30. September 2010)



# Mandate des Aufsichtsrats

## Prof. Dr. h.c. mult. Berthold Beitz, Essen

Ehrenvorsitzender

Vorsitzender des Kuratoriums der Alfried  
Krupp von Bohnen und Halbach-Stiftung

.....

## Prof. Dr. Günter Vogelsang, Düsseldorf

Ehrenvorsitzender

.....

## Dr. Gerhard Cromme, Essen

Vorsitzender

ehem. Vorsitzender des Vorstands  
der ThyssenKrupp AG

- Allianz SE
- Axel Springer AG
- Siemens AG (Vorsitz)
- Compagnie de Saint-Gobain/Frankreich

## Bertin Eichler, Frankfurt/Main

stellv. Vorsitzender

Geschäftsführendes Vorstandsmitglied  
der IG Metall

- BGAG Beteiligungsgesellschaft der  
Gewerkschaften GmbH (Vorsitz)
- BMW AG

## Markus Grolms, Bochum

(seit 14.10.2009)

Gewerkschaftssekretär im Zweigbüro  
Düsseldorf der IG Metall

.....

## Susanne Herberger, Dresden

Ingenieur (FH) für Informatik

Vorsitzende des Gesamtbetriebsrats

der ThyssenKrupp Aufzüge GmbH und

Vorsitzende der Betriebsrätearbeitsgemeinschaft

ThyssenKrupp Elevator Technology

konzernintern:

- ThyssenKrupp Elevator AG

## Bernd Kalwa, Krefeld

Dreher

Vorsitzender des Gesamtbetriebsrats

der ThyssenKrupp Nirosta GmbH und

Vorsitzender der Betriebsrätearbeitsgemeinschaft

ThyssenKrupp Stainless Global

konzernintern:

- ThyssenKrupp Nirosta GmbH

## Prof. Dr. Hans-Peter Keitel, Essen

(seit 21.01.2010)

Präsident des Bundesverbandes  
der Deutschen Industrie e.V.

- Commerzbank AG
- HOCHTIEF AG
- National-Bank AG
- EQT Infrastructure Limited (Mitglied  
des Investitionsbeirats)
- RAG-Stiftung (Mitglied des Kuratoriums)

## Ernst-August Kiel, Blumenthal

(seit 12.04.2010)

Schlosser

Vorsitzender des Betriebsrats der

Howaldtswerke-Deutsche Werft GmbH und

Vorsitzender der Betriebsrätearbeitsgemeinschaft

ThyssenKrupp Marine Systems

konzernintern:

- Howaldtswerke-Deutsche Werft GmbH
- ThyssenKrupp Marine Systems AG



**Prof. Dr. Ulrich Lehner, Düsseldorf**

Mitglied des Gesellschafterausschusses  
der Henkel AG & Co. KGaA

- Deutsche Telekom AG (Vorsitz)
- E.ON AG
- Henkel Management AG
- HSBC Trinkaus & Burkhardt AG
- Porsche Automobil Holding SE
- Dr. August Oetker KG (Mitglied des Beirats)
- Henkel AG & Co. KGaA (Mitglied des Gesellschafterausschusses)
- Novartis AG/Schweiz (Mitglied des Verwaltungsrats)

**Prof. Dr. Bernhard Pellens, Bochum**

Professor für Betriebswirtschaft und  
Internationale Unternehmensrechnung  
an der Ruhr-Universität Bochum

- Röf's WP Partner AG Wirtschafts-  
prüfungsgesellschaft

**Peter Remmler, Wolfsburg**

Kaufmann im Groß- und Außenhandel  
Vorsitzender des Betriebsrats der  
ThyssenKrupp Schulte GmbH (Braunschweig)  
und Vorsitzender der Betriebsrätearbeits-  
gemeinschaft ThyssenKrupp Materials Services  
.....

**Dr. Kersten v. Schenck, Bad Homburg**

Rechtsanwalt und Notar

- Praktiker Bau- und Heimwerkermärkte  
Holding AG (Vorsitz)
- Praktiker Deutschland GmbH (Vorsitz)

**Peter Scherrer, Brüssel**

Generalsekretär des Europäischen  
Metallgewerkschaftsbundes

- Vodafone Holding GmbH

**Thomas Schlenz, Duisburg**

Schichtmeister  
Vorsitzender des Konzernbetriebsrats  
der ThyssenKrupp AG

- PEAG Personalentwicklungs- und  
Arbeitsmarktagentur GmbH  
konzernintern:
- ThyssenKrupp Materials International GmbH
- ThyssenKrupp MillServices & Systems GmbH

**Dr. Henning Schulte-Noelle, München**

Vorsitzender des Aufsichtsrats  
der Allianz SE

- Allianz SE (Vorsitz)
- E.ON AG

**Wilhelm Segerath, Duisburg**

Karosserie- und Fahrzeugbauer  
Vorsitzender des Gesamtbetriebsrats  
der ThyssenKrupp Steel Europe AG und  
Vorsitzender der Betriebsrätearbeits-  
gemeinschaft ThyssenKrupp Steel Europe  
konzernintern:

- ThyssenKrupp Steel Europe AG

**Peer Steinbrück, Bonn**

(seit 21.01.2010)

Mitglied des Deutschen Bundestages  
Bundesminister a.D.

.....

**Christian Streiff, Paris**

ehem. Präsident der PSA Peugeot Citroën S.A.

- Ecole Nationale Supérieure des Mines  
de Paris/Frankreich
- TI Automotive Ltd./Großbritannien

**Jürgen R. Thumann, Düsseldorf**

Vorsitzender des Beirats  
der Heitkamp & Thumann Group

- Deutsche Messe AG
- HanseMerkur Holding AG
- HanseMerkur Krankenversicherung  
auf Gegenseitigkeit
- Heitkamp BauHolding GmbH (Vorsitz)
- Heitkamp & Thumann Group  
(Vorsitzender des Beirats)

**Prof. Dr. Beatrice Weder di Mauro,  
Frankfurt/Main**

(seit 21.01.2010)

Professorin für Volkswirtschaftslehre, Wirt-  
schaftspolitik & Internationale Makroökonomik  
an der Johannes-Gutenberg-Universität Mainz  
und Mitglied im Sachverständigenrat zur  
Begutachtung der gesamtwirtschaftlichen  
Entwicklung

- Roche AG/Schweiz (Mitglied  
des Verwaltungsrats)

**Klaus Wiercimok, Düsseldorf**

Rechtsanwalt

Leiter des Departments Materials Services  
im Corporate Center Legal & Compliance  
der ThyssenKrupp AG  
konzernintern:

- ThyssenKrupp Xervon GmbH

Mit Ablauf des 21. Januar 2010 sind die Herren

**Prof. Jürgen Hubbert, Dr. Martin Kohlhaussen**  
und **Dr. Heinz Kriwet**, und mit Ablauf des  
31. März 2010 ist Herr **Theo Frielinghaus** aus  
dem Aufsichtsrat ausgeschieden. Sofern  
von diesen Herren zum Zeitpunkt ihres Aus-  
scheidens aus dem Aufsichtsrat andere  
Mandate wahrgenommen wurden, sind diese  
im Folgenden aufgeführt:

**Prof. Jürgen Hubbert, Sindelfingen**

ehem. Mitglied des Vorstands  
der DaimlerChrysler AG

- HWA AG (Vorsitz)
- Häussler Group (Vorsitzender des Beirats)
- TÜV Süddeutschland Holding AG (Mitglied  
des Gesellschafterausschusses)

**Dr. Martin Kohlhaussen, Bad Homburg**

ehem. Vorsitzender des Aufsichtsrats  
der Commerzbank AG

- HOCHTIEF AG (Vorsitz)

**Theo Frielinghaus, Ahlen**

Maschinenbautechniker

Vorsitzender des Betriebsrats der Polysius AG  
konzernintern:

- Polysius AG



# Stichwortverzeichnis

|                              |              |
|------------------------------|--------------|
| <b>A</b>                     |              |
| Absatzmärkte                 | 109, 176     |
| Abkürzungen                  | 293          |
| Abschlussprüfung             | 56, 252, 279 |
| Aktie                        | 75           |
| Aktionärsstruktur            | 78           |
| Altersvorsorge               | 159, 221     |
| Anhang                       | 192          |
| Anteilsbesitz                | 256          |
| Arbeitssicherheit            | 143, 160     |
| Aufsichtsrat                 | 48           |
| Auftragseingang              | 105          |
| Ausbildung                   | 158, 181     |
| Ausblick                     | 175          |
| Ausschüsse des Aufsichtsrats | 49, 52       |

|                                  |                             |
|----------------------------------|-----------------------------|
| <b>B</b>                         |                             |
| Bereinigtes Ergebnis             | 106                         |
| Bericht des Aufsichtsrats        | 51                          |
| Beschaffung                      | 111, 181                    |
| Bestätigungsvermerk              | 279                         |
| Bilanz                           | 187                         |
| Bilanzgewinn der ThyssenKrupp AG | 107                         |
| Bilanzstruktur                   | 137                         |
| Bonus                            | 69                          |
| Börsenhandel                     | 77                          |
| Börsenwert/Marktkapitalisierung  | 77                          |
| Branchenkonjunktur               | 101, 176                    |
| Brief an die Aktionäre           | U3                          |
| Bruttoinlandsprodukt             | 101, 176                    |
| Business Areas                   | 85, 117, 171, 179, 180, 243 |
| Business Services                | 85, 134, 244                |

|                           |                         |
|---------------------------|-------------------------|
| <b>C</b>                  |                         |
| Cash-Flow                 | 136, 191, 253           |
| Chancenbericht            | 178                     |
| Chancenmanagement         | 178                     |
| Code of Conduct           | 63                      |
| Compliance                | 62, 168                 |
| Components Technology     | 130, 173, 179, 181, 244 |
| Corporate ThyssenKrupp AG | 134, 244                |
| Corporate Governance      | 56, 58                  |
| Corporate Headquarter     | 04, 86, 92              |

|                       |                  |
|-----------------------|------------------|
| <b>D</b>              |                  |
| Definition EBIT (new) | 96               |
| Desinvestitionen      | 108              |
| Disposal Groups       | 206              |
| Dividende             | 57, 78, 107, 181 |
| Divisions             | 86               |

|                                  |                         |
|----------------------------------|-------------------------|
| <b>E</b>                         |                         |
| Eigene Aktien                    | 79, 219                 |
| Eigenkapital                     | 218                     |
| Eigenkapitalveränderungsrechnung | 190                     |
| Elevator Technology              | 126, 173, 179, 180, 243 |

|                                   |                     |
|-----------------------------------|---------------------|
| Emissionshandel                   | 115, 156, 182       |
| Energie                           | 114, 182            |
| Entsprechenserklärung             | 56, 60, 61, 63, 253 |
| Ergebnis                          | 97, 105, 180        |
| Ergebnis je Aktie                 | 78, 194, 252        |
| Erklärung zur Unternehmensführung | 58, 87              |

|                               |                 |
|-------------------------------|-----------------|
| <b>F</b>                      |                 |
| Finanzierung                  | 135, 182, 191   |
| Finanzinstrumente             | 167, 233        |
| Finanzkalender                | 294             |
| Finanzschulden                | 228             |
| Finanzwirtschaftliche Risiken | 166, 238        |
| Finanz- und Vermögenslage     | 135             |
| Fixum                         | 68              |
| Forschung und Entwicklung     | 146, 181        |
| Frauenanteil                  | 54, 56, 64, 162 |
| Free Float                    | 79              |
| Führungskräfteentwicklung     | 161             |
| Führungsverantwortung         | 86              |

|                               |             |
|-------------------------------|-------------|
| <b>G</b>                      |             |
| Geschäftsverlauf              | 100         |
| Gesellschaftliches Engagement | 63, 144     |
| Gesamtergebnisrechnung        | 189         |
| Gewinn- und Verlustrechnung   | 188         |
| Glossar                       | 292         |
| Grundkapital                  | 78, 87, 218 |

|                          |              |
|--------------------------|--------------|
| <b>H</b>                 |              |
| Hauptversammlung         | 65, 108, 294 |
| Hochschulk Kooperationen | 160          |

|                                                                                           |             |
|-------------------------------------------------------------------------------------------|-------------|
| <b>I</b>                                                                                  |             |
| IFRS                                                                                      | 39, 56, 192 |
| Immaterielle Vermögenswerte                                                               | 209         |
| Industrials-Aktivitäten                                                                   | 79          |
| Innovationen                                                                              | 146, 181    |
| Investitionen                                                                             | 110         |
| Investor Relations                                                                        | 79          |
| Internes Kontroll- und Risikomanagementsystem im Hinblick auf den Rechnungslegungsprozess | 165         |

|                      |               |
|----------------------|---------------|
| <b>K</b>             |               |
| Kapitalflussrechnung | 136, 191, 253 |
| Kapitalkostensätze   | 94            |
| Kennzahlen zur Aktie | 75            |
| Klimaschutz          | 152, 182      |
| Konjunktur           | 100, 175      |
| Konsolidierung       | 192           |
| Kontakt              | 294           |
| Konzernabschluss     | 183           |
| Konzernlagebericht   | 81            |
| Kundengruppen        | 102           |
| Kursentwicklung      | 75            |
| Kurzarbeit           | 101, 158      |



|                         |          |
|-------------------------|----------|
| <b>L</b>                |          |
| Leistungsprofil         | 85       |
| Liquiditätsplanung      | 135, 182 |
| Long Term Incentiveplan | 68       |

|                                     |                         |
|-------------------------------------|-------------------------|
| <b>M</b>                            |                         |
| Magazin                             | 01                      |
| Mandate des Aufsichtsrats           | 288                     |
| Mandate des Vorstands               | 287                     |
| Marine Systems                      | 133, 174, 179, 181, 244 |
| Marketing                           | 109                     |
| Materialaufwand                     | 111, 181                |
| Materials Services                  | 124, 173, 179, 180, 243 |
| Mehrjahresübersicht                 | 285                     |
| Meldepflichtige Wertpapiergeschäfte | 65                      |
| Mid Term Incentiveplan              | 68, 220                 |
| Mitarbeiter                         | 109, 157, 181, 252      |

|                      |             |
|----------------------|-------------|
| <b>N</b>             |             |
| Nachhaltigkeit       | 43, 63, 142 |
| Nachtragsbericht     | 175         |
| Netto-Finanzschulden | 110, 140    |

|                       |        |
|-----------------------|--------|
| <b>O</b>              |        |
| Organisationsstruktur | 85, 92 |

|                     |                         |
|---------------------|-------------------------|
| <b>P</b>            |                         |
| Pensionen           | 69, 221                 |
| Personalaufwand     | 158, 181, 252           |
| Plant Technology    | 128, 173, 179, 181, 244 |
| Portfoliomanagement | 92, 96, 108             |
| Prognosebericht     | 175                     |

|                         |          |
|-------------------------|----------|
| <b>R</b>                |          |
| Rabattierter Aktienkauf | 72, 221  |
| Rating                  | 136      |
| Rechtliche Risiken      | 168, 231 |
| Risikobericht           | 163      |
| Risikomanagement        | 66, 163  |
| ROCE                    | 95       |

|                      |                         |
|----------------------|-------------------------|
| <b>S</b>             |                         |
| Sachanlagen          | 213                     |
| Stahlwerk Brasilien  | 14, 92, 120             |
| Stainless Global     | 122, 172, 179, 180, 243 |
| Stammdaten der Aktie | 77                      |
| Steel Europe         | 117, 171, 179, 180, 243 |
| Steel Americas       | 120, 172, 179, 180, 243 |
| Strategie            | 91                      |

|                                  |            |
|----------------------------------|------------|
| <b>T</b>                         |            |
| Tantieme                         | 68         |
| Termine                          | 294        |
| ThyssenKrupp Academy             | 161        |
| ThyssenKrupp best                | 97         |
| ThyssenKrupp House of Innovation | 147        |
| ThyssenKrupp PerspActive         | 161        |
| ThyssenKrupp PLuS                | 97         |
| ThyssenKrupp Quartier            | 04, 83, 86 |
| ThyssenKrupp Value Added (TKVA)  | 93, 95     |
| Tochterunternehmen               | 86, 256    |

|                               |          |
|-------------------------------|----------|
| <b>U</b>                      |          |
| Übernahmerechtliche Angaben   | 87       |
| Umsatz                        | 105, 180 |
| Umweltschutz                  | 152, 182 |
| Unternehmenssteuerung         | 91       |
| Unternehmensführungspraktiken | 62       |

|                                         |                 |
|-----------------------------------------|-----------------|
| <b>V</b>                                |                 |
| Vergütung des Aufsichtsrats             | 72, 242         |
| Vergütung des Vorstands                 | 67, 242         |
| Vergütungsbericht                       | 67, 87          |
| Versicherung der gesetzlichen Vertreter | 280             |
| Vielfalt/Diversity                      | 54, 56, 64, 162 |
| Vorräte                                 | 216             |
| Vorstand                                | 46              |

|                                      |                  |
|--------------------------------------|------------------|
| <b>W</b>                             |                  |
| Währungsumrechnung                   | 193              |
| Werke Steel/Stainless in Alabama/USA | 24, 92, 121, 123 |
| Wertorientiertes Management          | 93               |

|                            |     |
|----------------------------|-----|
| <b>Z</b>                   |     |
| Zusammenfassende Bewertung | 116 |



# Glossar

|                                                                                                                                                                                                                    |                                                                                                                                                                                                                                                                                                               |  |                                                                                                                                                                                                                                                   |
|--------------------------------------------------------------------------------------------------------------------------------------------------------------------------------------------------------------------|---------------------------------------------------------------------------------------------------------------------------------------------------------------------------------------------------------------------------------------------------------------------------------------------------------------|--|---------------------------------------------------------------------------------------------------------------------------------------------------------------------------------------------------------------------------------------------------|
| <b>A</b>                                                                                                                                                                                                           |                                                                                                                                                                                                                                                                                                               |  | <b>P</b>                                                                                                                                                                                                                                          |
| <b>Anarbeitung</b><br>in Service-Center ausgelagerte erste Stufe der Werkstoffbearbeitung (z.B. Zuschnitte, Oberflächenbearbeitung)                                                                                | <b>Erklärung zur Unternehmensführung</b><br>Erklärung einer Aktiengesellschaft nach § 289a HGB, die die Beschreibung der Arbeitsweise von Vorstand und Aufsichtsrat sowie die Zusammensetzung und Arbeitsweise der Ausschüsse, die Entsprechenserklärung und Angaben zu Unternehmensführungspraktiken umfasst |  | <b>Panamaxklasse</b><br>Klasse von Schiffen mit maximalen Abmessungen für Panama-Kanal (um 289 m bzw. 294 m lang, 32 m breit bei Tiefgang von 12 m)                                                                                               |
| <b>B</b>                                                                                                                                                                                                           | <b>F</b>                                                                                                                                                                                                                                                                                                      |  | <b>R</b>                                                                                                                                                                                                                                          |
| <b>Bramme</b><br>kompakter Block aus Rohstahl als Vorprodukt für Bleche oder Bänder                                                                                                                                | <b>Free Cash-Flow (vor Dividende)</b><br>Operating Cash-Flow abzüglich Cash-Flow aus Investitionstätigkeit                                                                                                                                                                                                    |  | <b>Rating</b><br>Ratings dienen der Beurteilung der zukünftigen Fähigkeit eines Unternehmens zur pünktlichen und vollständigen Erfüllung seiner Zahlungsverpflichtungen und ergeben sich aus der Analyse quantitativer und qualitativer Faktoren. |
| <b>Bruttoergebnis vom Umsatz</b><br>Umsatz abzüglich Umsatzkosten                                                                                                                                                  | <b>Free Float</b><br>Streubesitz                                                                                                                                                                                                                                                                              |  | <b>ROCE</b><br>Rentabilität des eingesetzten verzinslichen Kapitals (Return on Capital Employed)                                                                                                                                                  |
| <b>Business Continuity Plan</b><br>Konzepte und Planungen zur Aufrechterhaltung der betrieblichen Tätigkeit unter erschwerten äußeren Bedingungen                                                                  | <b>G</b>                                                                                                                                                                                                                                                                                                      |  | <b>S</b>                                                                                                                                                                                                                                          |
| <b>C</b>                                                                                                                                                                                                           | <b>Gearing</b><br>Netto-Finanzschulden : Eigenkapital (je geringer die Kennzahl, desto höher der Eigenkapitalanteil am eingesetzten verzinslichen Kapital)                                                                                                                                                    |  | <b>Supply-Chain-Management</b><br>integrierte Planung, Steuerung und Kontrolle aller in einer Lieferkette auftretenden logistischen Aktivitäten                                                                                                   |
| <b>Capital Employed</b><br>eingesetztes verzinsliches Kapital                                                                                                                                                      | <b>I</b>                                                                                                                                                                                                                                                                                                      |  | <b>SWOT-Analyse</b><br>Instrument zur Situationsanalyse und zur Strategiefindung. Es vereint eine Stärken-Schwächen-Analyse und eine Chancen-Risiken-Analyse. SWOT steht für Strengths, Weaknesses, Opportunities and Threats.                    |
| <b>Compliance</b><br>Oberbegriff für Maßnahmen zur Einhaltung von Recht, Gesetz und unternehmensinternen Richtlinien                                                                                               | <b>Innenfinanzierungskraft</b><br>Operating Cash-Flow : Cash-Flow aus Investitionstätigkeit                                                                                                                                                                                                                   |  | <b>T</b>                                                                                                                                                                                                                                          |
| <b>Corporate Governance</b><br>Bezeichnung für verantwortliche, auf langfristige Wertschöpfung ausgerichtete Unternehmensleitung und Unternehmenskontrolle                                                         | <b>International Financial Reporting Standards (IFRS)</b><br>Das international einheitliche Regelwerk für Rechnungslegungsvorschriften soll Unternehmensdaten besser vergleichbar machen. Nach EU-Verordnung müssen börsennotierte Unternehmen nach diesen Regeln bilanzieren und berichten.                  |  | <b>Tailored Blank</b><br>Platine, die aus einzelnen Stahlfeinblechen verschiedener Güte, Dicke und Oberflächenveredelung besteht und deren Teile tiefziehfähig miteinander verschweißt sind                                                       |
| <b>D</b>                                                                                                                                                                                                           | <b>L</b>                                                                                                                                                                                                                                                                                                      |  | <b>ThyssenKrupp best</b><br>Programm zur Effizienzsteigerung in allen Bereichen des Unternehmens. best steht für „business excellence in service and technology“.                                                                                 |
| <b>DAX</b><br>Deutscher Aktienindex, zusammengestellt von der Deutschen Börse. Der Index bildet die Wertentwicklung der 30 größten und umsatzstärksten deutschen Aktien, darunter auch der ThyssenKrupp Aktie, ab. | <b>Long Term Incentiveplan (LTI)</b><br>langfristige variable Vergütung durch Wertrechte für Vorstandsmitglieder und weitere ausgewählte Führungskräfte                                                                                                                                                       |  | <b>ThyssenKrupp PLuS</b><br>konzernweites Maßnahmenprogramm zur Realisierung positiver Ergebnis- und Liquiditätseffekte sowie nachhaltiger Performance-Verbesserungen                                                                             |
| <b>E</b>                                                                                                                                                                                                           | <b>K</b>                                                                                                                                                                                                                                                                                                      |  | <b>ThyssenKrupp Value Added (TKVA)</b><br>zentrale Steuerungskennzahl für wertorientiertes Management, die das Ergebnis vor Steuern und Zinsen mit den Kapitalkosten vergleicht                                                                   |
| <b>EBIT</b><br>Ergebnis vor Steuern und Zinsen (Earnings before Interest, Taxes)                                                                                                                                   | <b>Kapitalkostensatz</b><br>vorgegebener Mindestverzinsungsanspruch der Kapitalgeber                                                                                                                                                                                                                          |  | <b>U</b>                                                                                                                                                                                                                                          |
| <b>EBITDA</b><br>Ergebnis vor Steuern, Zinsen und Abschreibungen (Earnings before Interest, Taxes, Depreciation and Amortization)                                                                                  | <b>M</b>                                                                                                                                                                                                                                                                                                      |  | <b>Umschlagsdauer Vorräte</b><br>Vorräte : Umsatz, multipliziert mit 360 (je niedriger die Kennzahl, desto schneller der Vorratumschlag)                                                                                                          |
| <b>EBT</b><br>Ergebnis vor Steuern (Earnings before Taxes)                                                                                                                                                         | <b>Mid Term Incentiveplan (MTI)</b><br>mittelfristige variable Vergütung durch Wertrechte für Vorstandsmitglieder und weitere ausgewählte Führungskräfte                                                                                                                                                      |  | <b>W</b>                                                                                                                                                                                                                                          |
| <b>Eigenkapitalquote</b><br>bilanzielles Eigenkapital : Bilanzsumme (je höher die Kennzahl, desto geringer der Verschuldungsgrad)                                                                                  | <b>MSCI-Indizes</b><br>MSCI-Indizes sind Aktienindizes, die die Entwicklung von Aktien in Regionen bzw. weltweit widerspiegeln und von dem US-amerikanischen Finanzdienstleister Morgan Stanley Capital International berechnet werden.                                                                       |  | <b>Weißblech</b><br>dünnes Stahlblech für die Verpackungsindustrie, dessen Oberfläche elektrolytisch mit Zinn oder Chrom beschichtet wurde                                                                                                        |
| <b>Emerging Markets</b><br>aufstrebende Märkte in Asien, Lateinamerika und Osteuropa                                                                                                                               | <b>N</b>                                                                                                                                                                                                                                                                                                      |  | <b>Z</b>                                                                                                                                                                                                                                          |
| <b>Entsprechenserklärung</b><br>Erklärung von Vorstand und Aufsichtsrat nach § 161 AktG zur Umsetzung der Empfehlungen der Regierungskommission Deutscher Corporate Governance Kodex                               | <b>Net-Working Capital</b><br>Netto-Umlaufvermögen                                                                                                                                                                                                                                                            |  | <b>Zahlungsziel Debitoren</b><br>Forderungen aus Lieferungen und Leistungen: Umsatz, multipliziert mit 360 (je niedriger die Kennzahl, desto schneller bezahlen die Kunden)                                                                       |
| <b>E-Procurement</b><br>Materialeinkauf unter Nutzung moderner elektronischer Medien, insbesondere des Internets                                                                                                   | <b>O</b>                                                                                                                                                                                                                                                                                                      |  |                                                                                                                                                                                                                                                   |
|                                                                                                                                                                                                                    | <b>Oberflächenveredelung</b><br>Korrosionsschutz bei Qualitätsstahl durch Beschichten mit metallischen oder organischen Überzügen                                                                                                                                                                             |  |                                                                                                                                                                                                                                                   |
|                                                                                                                                                                                                                    | <b>Operating Cash-Flow</b><br>Zufluss/Abfluss von Zahlungsmitteln und Zahlungsmitteläquivalenten außerhalb der Investitions-, Desinvestitions- oder Finanzierungstätigkeit                                                                                                                                    |  |                                                                                                                                                                                                                                                   |



# Abkürzungsverzeichnis

## A

### AktG

Aktengesetz

## B

### BRIC

Brasilien, Russland, Indien, China

## C

### CESR

Committee of European Securities Regulators

### CGU

Cash Generating Unit

### CO<sub>2</sub>

Kohlendioxid

## D

### DAX

Deutscher Aktienindex

### DEHSt

Deutsche Emissionshandelsstelle

### DJ Stoxx

Dow Jones STOXX

### DRS

Deutscher Rechnungslegungsstandard

### DSR

Deutscher Standardisierungsrat

## E

### EPS

Earnings per Share

## F

### fob

free on board entsprechend  
International Commercial Terms

### FFO/TD

Funds From Operations/Total Debt

## H

### HGB

Handelsgesetzbuch

## I

### IAS

International Accounting Standards

### IASB

International Accounting Standards Board

### IFRIC

International Financial Interpretations Committee  
bzw. Interpretation des IFRIC

### IFRS

International Financial Reporting Standards

### IS

Informationssicherheit

### IT

Informationstechnologie

## L

### LTI

Long Term Incentiveplan

## M

### MitbestG

Mitbestimmungsgesetz

### MSCI-Indizes

Morgan Stanley Capital International-Indizes

### MTI

Mid Term Incentiveplan

## N

### NE-Metall

Nichteisenmetall (z.B. Aluminium)

## R

### ROCE

Return on Capital Employed

## S

### SIC

Interpretation des IFRIC

### SPE

Special Purpose Entity

## T

### T€

1.000 €

### TKVA

ThyssenKrupp Value Added

## V

### VorstAG

Gesetz zur Angemessenheit der Vorstandsvergütung

## W

### WACC

Weighted Average Cost of Capital

### WpHG

Wertpapierhandelsgesetz



# Kontakt / Termine 2011/2012

Für Fragen stehen Ihnen folgende  
Ansprechpartner zur Verfügung:

## Communications, Strategy & Technology

Telefon (0201) 844-536043  
Telefax (0201) 844-536041  
E-Mail [press@thyssenkrupp.com](mailto:press@thyssenkrupp.com)

## Investor Relations

E-Mail [ir@thyssenkrupp.com](mailto:ir@thyssenkrupp.com)

## Institutionelle Investoren und Analysten

Telefon (0201) 844-536464  
Telefax (0201) 8456-531000

## Privatanleger

Infoline 01802 252 252 (0,06 € pro Gespräch)  
Telefax (0201) 8456-531000

## Hausanschrift

ThyssenKrupp AG  
ThyssenKrupp Allee 1, 45143 Essen  
Postfach, 45063 Essen  
Telefon (0201) 844-0  
Telefax (0201) 844-536000  
E-Mail [info@thyssenkrupp.com](mailto:info@thyssenkrupp.com)

## Zukunftsbezogene Aussagen

Dieser Bericht enthält zukunftsbezogene Aussagen, die auf aktuellen Einschätzungen des Managements über künftige Entwicklungen beruhen. Solche Aussagen unterliegen Risiken und Unsicherheiten, die außerhalb der Möglichkeiten von ThyssenKrupp bezüglich einer Kontrolle oder präzisen Einschätzung liegen, wie beispielsweise das zukünftige Marktumfeld und die wirtschaftlichen Rahmenbedingungen, das Verhalten der übrigen Marktteilnehmer, die erfolgreiche Integration von Neuerwerben und Realisierung der erwarteten Synergieeffekte sowie Maßnahmen staatlicher Stellen. Sollten einer dieser oder andere Unsicherheitsfaktoren und Unwägbarkeiten eintreten oder sollten sich die Annahmen, auf denen diese Aussagen basieren, als unrichtig erweisen, könnten die tatsächlichen Ergebnisse wesentlich von den in diesen Aussagen explizit genannten oder implizit enthaltenen Ergebnissen abweichen. Es ist von ThyssenKrupp weder beabsichtigt, noch übernimmt ThyssenKrupp eine gesonderte Verpflichtung, zukunftsbezogene Aussagen zu aktualisieren, um sie an Ereignisse oder Entwicklungen nach dem Datum dieses Berichts anzupassen.

## Termine 2011/2012

### 21. Januar 2011

Ordentliche Hauptversammlung

### 24. Januar 2011

Zahlung der Dividende für das Geschäftsjahr 2009/2010

### 11. Februar 2011

Zwischenbericht

1. Quartal 2010/2011 (Oktober bis Dezember)

Telefonkonferenz mit Analysten und Investoren

### 13. Mai 2011

Zwischenbericht

1. Halbjahr 2010/2011 (Oktober bis März)

Analysten- und Investorenkonferenz

### 12. August 2011

Zwischenbericht

9 Monate 2010/2011 (Oktober bis Juni)

Telefonkonferenz mit Analysten und Investoren

### 06. Dezember 2011

Bilanzpressekonferenz

Analysten- und Investorenkonferenz

### 20. Januar 2012

Ordentliche Hauptversammlung

## Abweichungen aus technischen Gründen

Aus technischen Gründen (z.B. Umwandlung von elektronischen Formaten) kann es zu Abweichungen zwischen den in diesem Geschäftsbericht enthaltenen und den zum elektronischen Bundesanzeiger eingereichten Rechnungslegungsunterlagen kommen. In diesem Fall gilt die zum elektronischen Bundesanzeiger eingereichte Fassung als die verbindliche Fassung.

Der Geschäftsbericht liegt ebenfalls in englischer Übersetzung vor; bei Abweichungen geht die deutsche Fassung des Geschäftsberichts der englischen Übersetzung vor.

Der Geschäftsbericht steht in beiden Sprachen in Internet unter <http://www.thyssenkrupp.com> zum Download bereit. Darüber hinaus wird dort eine mediengerecht aufbereitete, interaktive Online-Version des Geschäftsberichts angeboten.

Weitere Exemplare schicken wir Ihnen auf Anfrage gerne kostenlos zu.  
Telefon (0201) 844-536367 und (0201) 844-538382,  
Telefax (0201) 8456-531000 oder E-Mail [ir@thyssenkrupp.com](mailto:ir@thyssenkrupp.com)







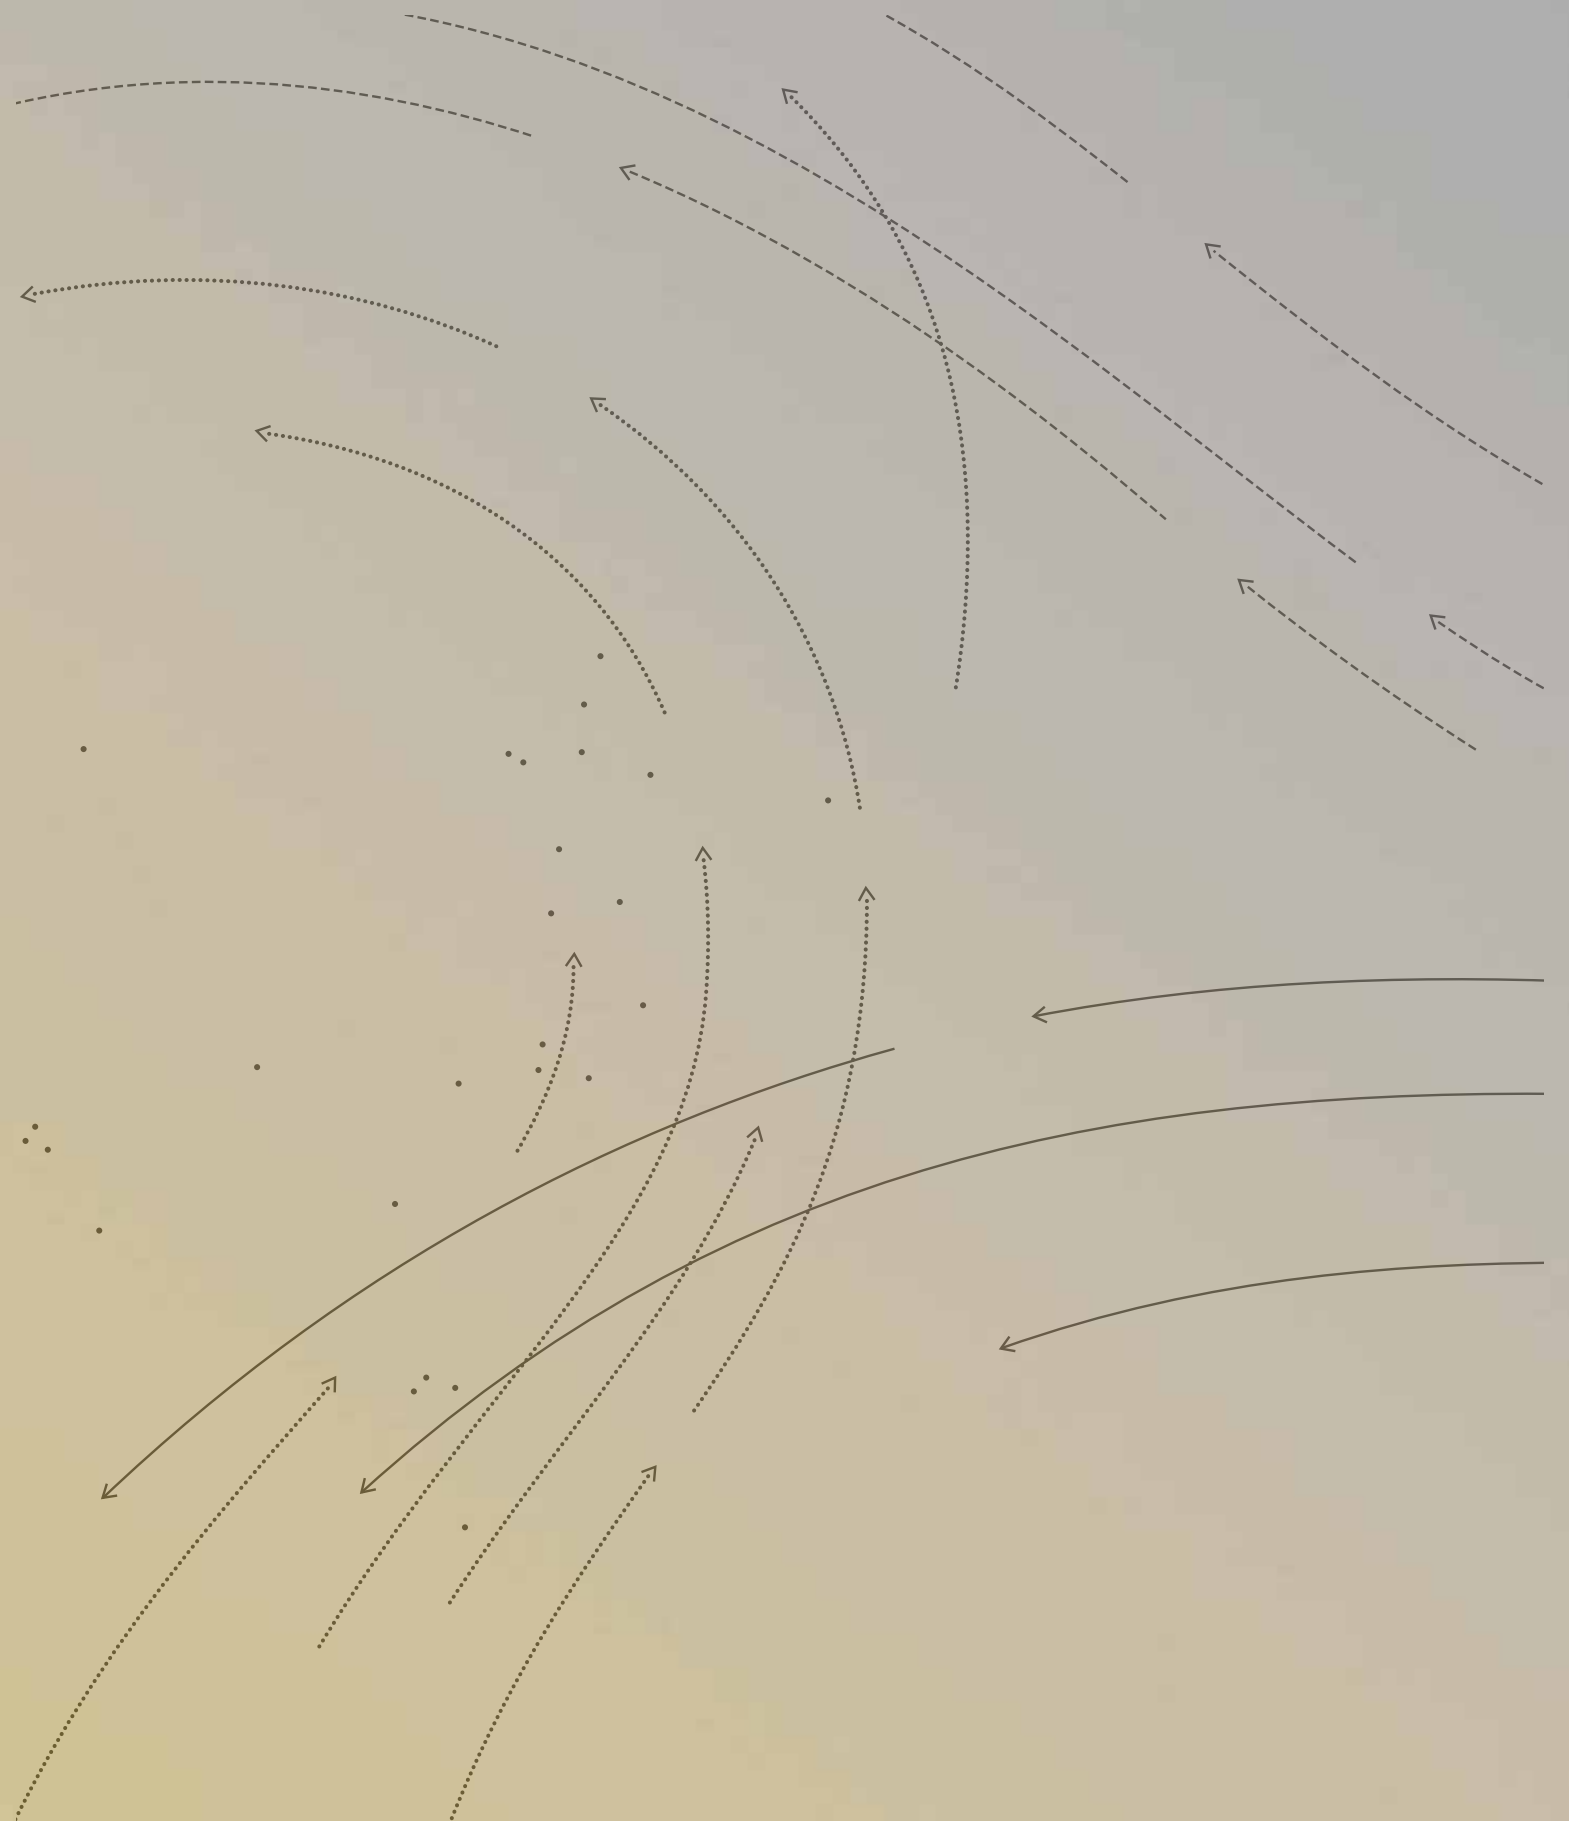

**ThyssenKrupp AG**

ThyssenKrupp Allee 1

45143 Essen

[www.thyssenkrupp.com](http://www.thyssenkrupp.com)
