# Supplementary material
Source: publisher site journal article supplement (https://www.degruyterbrill.com/publication/isbn/9783110432879/downloadAsset/9783110432879_Elektronischer_Anhang_2.zip)
Supplement: Supplementary file 93 [file ThyssenKrupp Unsere Werte.pdf › Korpustexte/Korpustexte pdf/ThyssenKrupp/ThyssenKrupp Unsere Werte.pdf]

# Unsere Werte

## Integrität und Vertrauen

- Wir teilen Erkenntnisse offen mit unseren Kunden und behandeln Projektinformationen vollkommen vertraulich
- Wir stellen uns und unsere Fähigkeiten richtig dar und sind ehrlich, auch wenn Ergebnisse nicht den Erwartungen entsprechen sollten

## Partnerschaft und Teamgeist

- Wir sind teamorientiert, konstruktiv, offen und kooperativ, unsere Zusammenarbeit basiert auf Respekt und Vertrauen
- Beziehungen zu unseren Kunden sind langfristig angelegt, wir verstehen uns als Berater und Coach in einer Person, in einem Team

## Ganzheitlichkeit und Individualität

- Wir verstehen die Herausforderungen unserer Kunden und setzen sie in den Gesamtkontext
- Wir entwickeln individuelle Lösungen für den Kunden, dabei sind wir objektiv und bringen die Markt- und Konzernperspektive ein

## Nachhaltigkeit und Mehrwert

- Wir suchen zukunftsgerichtete Lösungen und nicht nur inkrementelle Verbesserungen
- Mehrwert für den Kunden bedeutet für uns ergänzend auch praktikable Ansätze mit Umsetzungsorientierung

## Engagement und Flexibilität

- Wir setzen uns mit aller Kraft für den Erfolg unserer Kunden ein und stellen dabei höchste Qualitätsansprüche an unsere Arbeit
- Wir finden Lösungen für tatsächliche Kundenprobleme und sehen uns als Prozessbeschleuniger für Veränderungen

## Stetige Weiterentwicklung der Fähigkeiten

- Wir entwickeln uns durch stetiges Lernen und Mentoring weiter und profitieren von vielfältigen Hintergründen
- Der kontinuierliche Transfer von Know-How schließt unsere Kunden mit ein
