# Supplementary material
Source: publisher site journal article supplement (https://www.degruyterbrill.com/publication/isbn/9783110432879/downloadAsset/9783110432879_Elektronischer_Anhang_2.zip)
Supplement: Supplementary file 94 [file VW GB 2010.pdf › Korpustexte/Korpustexte pdf/VW/VW GB 2010.pdf]

# Vielfalt erfahren.

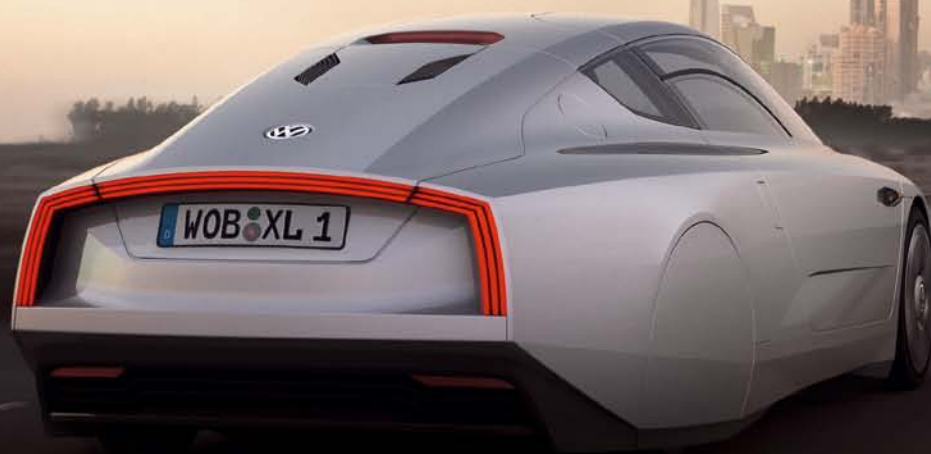

## Mission Zukunft.

Wie wird aus Visionen Realität?  
Astronaut Hans Wilhelm Schlegel  
und Prof. Dr. Martin Winterkorn  
im Gespräch. > S. 16

## Musica Mobile.

Weltstar Shakira über Autos,  
Freiheit und ihr Engagement für  
junge Menschen. > S. 44

## Wahrer Luxus.

Im Bentley unterwegs auf der  
Suche nach wahren Luxus.  
> S. 52

# VOLKSWAGEN

AKTIENGESELLSCHAFT

---

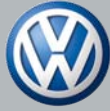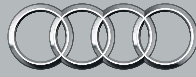

Audi

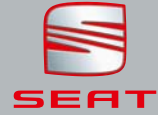

ŠKODA

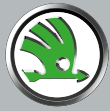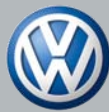

Nutzfahrzeuge

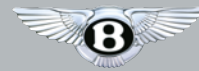

BENTLEY

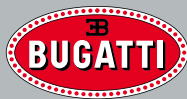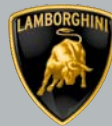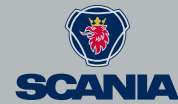

# VOLKSWAGEN FINANCIAL SERVICES

AKTIENGESELLSCHAFT

# Editorial

---

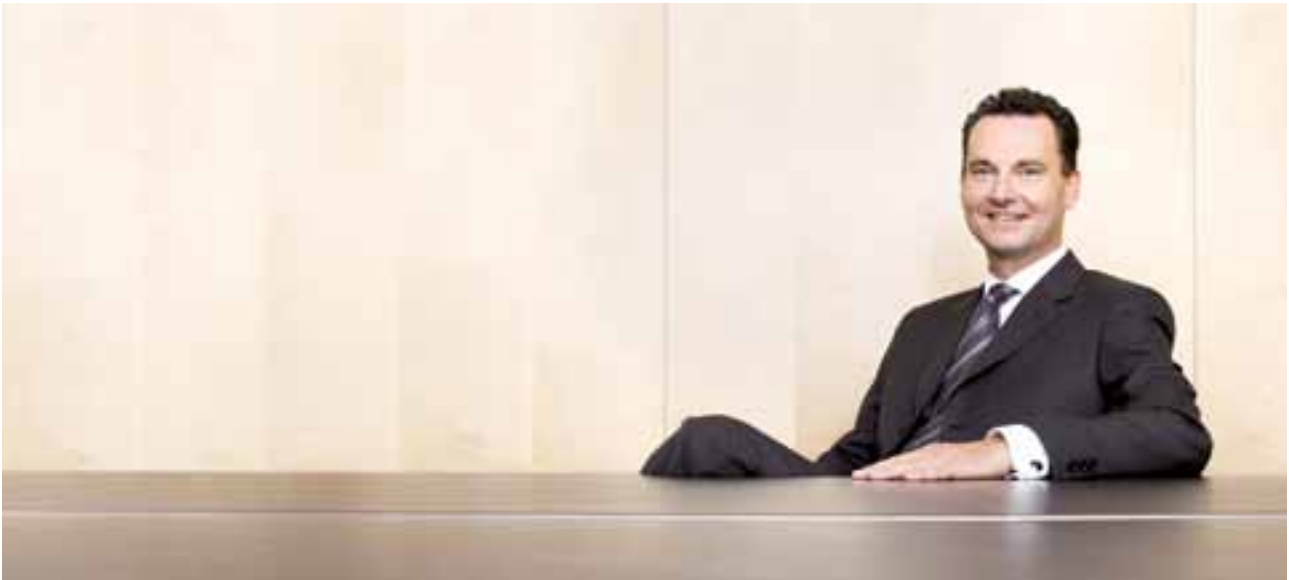

Liebe Leserinnen, liebe Leser,

die Automobilindustrie befindet sich in einem grundlegenden Wandel. Wer auch in Zukunft die Pole-Position besetzen will, muss heute vielfältige Lösungen gestalten – von neuen Antriebsformen über Fahrzeuge für alle Weltregionen bis hin zu intelligenten Ideen für vernetzte Mobilität.

Wohl kein anderes Automobilunternehmen ist so facettenreich wie der Volkswagen Konzern: Neun starke Marken und über 400.000 Mitarbeiter in aller Welt stehen für faszinierende Fahrzeuge und verantwortungsvolle Mobilität. Vielfalt ist unsere Stärke. Und sie ist der Treibstoff auf dem Weg in die automobilen Zukunft.

Mit diesem Magazin – einem Auszug aus dem Volkswagen Geschäftsbericht 2010 – laden wir Sie ein, die Vielfalt des Volkswagen Konzerns zu erfahren.

Begleiten Sie Starpianist Lang Lang auf seiner Tour mit dem Audi R8 durch die südchinesische Boom-Metropole Guangzhou. Erfahren Sie, wie Scania in Stockholm die Nachhaltigkeitsidee tagtäglich auf die Straße bringt. Oder begeben Sie sich mit uns nach Sant'Agata Bolognese, wo Lamborghini seine Supersportwagen durch Carbonfasern zu echten Leichtathleten macht.

Ich wünsche Ihnen viel Spaß bei dieser Entdeckungstour!

A handwritten signature in dark ink, reading "Stephan Grühsem". The signature is fluid and cursive, with the first name "Stephan" and last name "Grühsem" clearly distinguishable.

Stephan Grühsem  
Leiter Konzern Kommunikation





# KundenVielfalt.

Die Automobilwelt ist in ständiger Bewegung. Wer Kunden in aller Welt begeistern will, muss vielfältige

S. 24 KATAPULT IN DIE MODERNE. — S. 34 MUSIK DER METROPOLE. — S. 58 EINER FÜR ALLE WEGE.



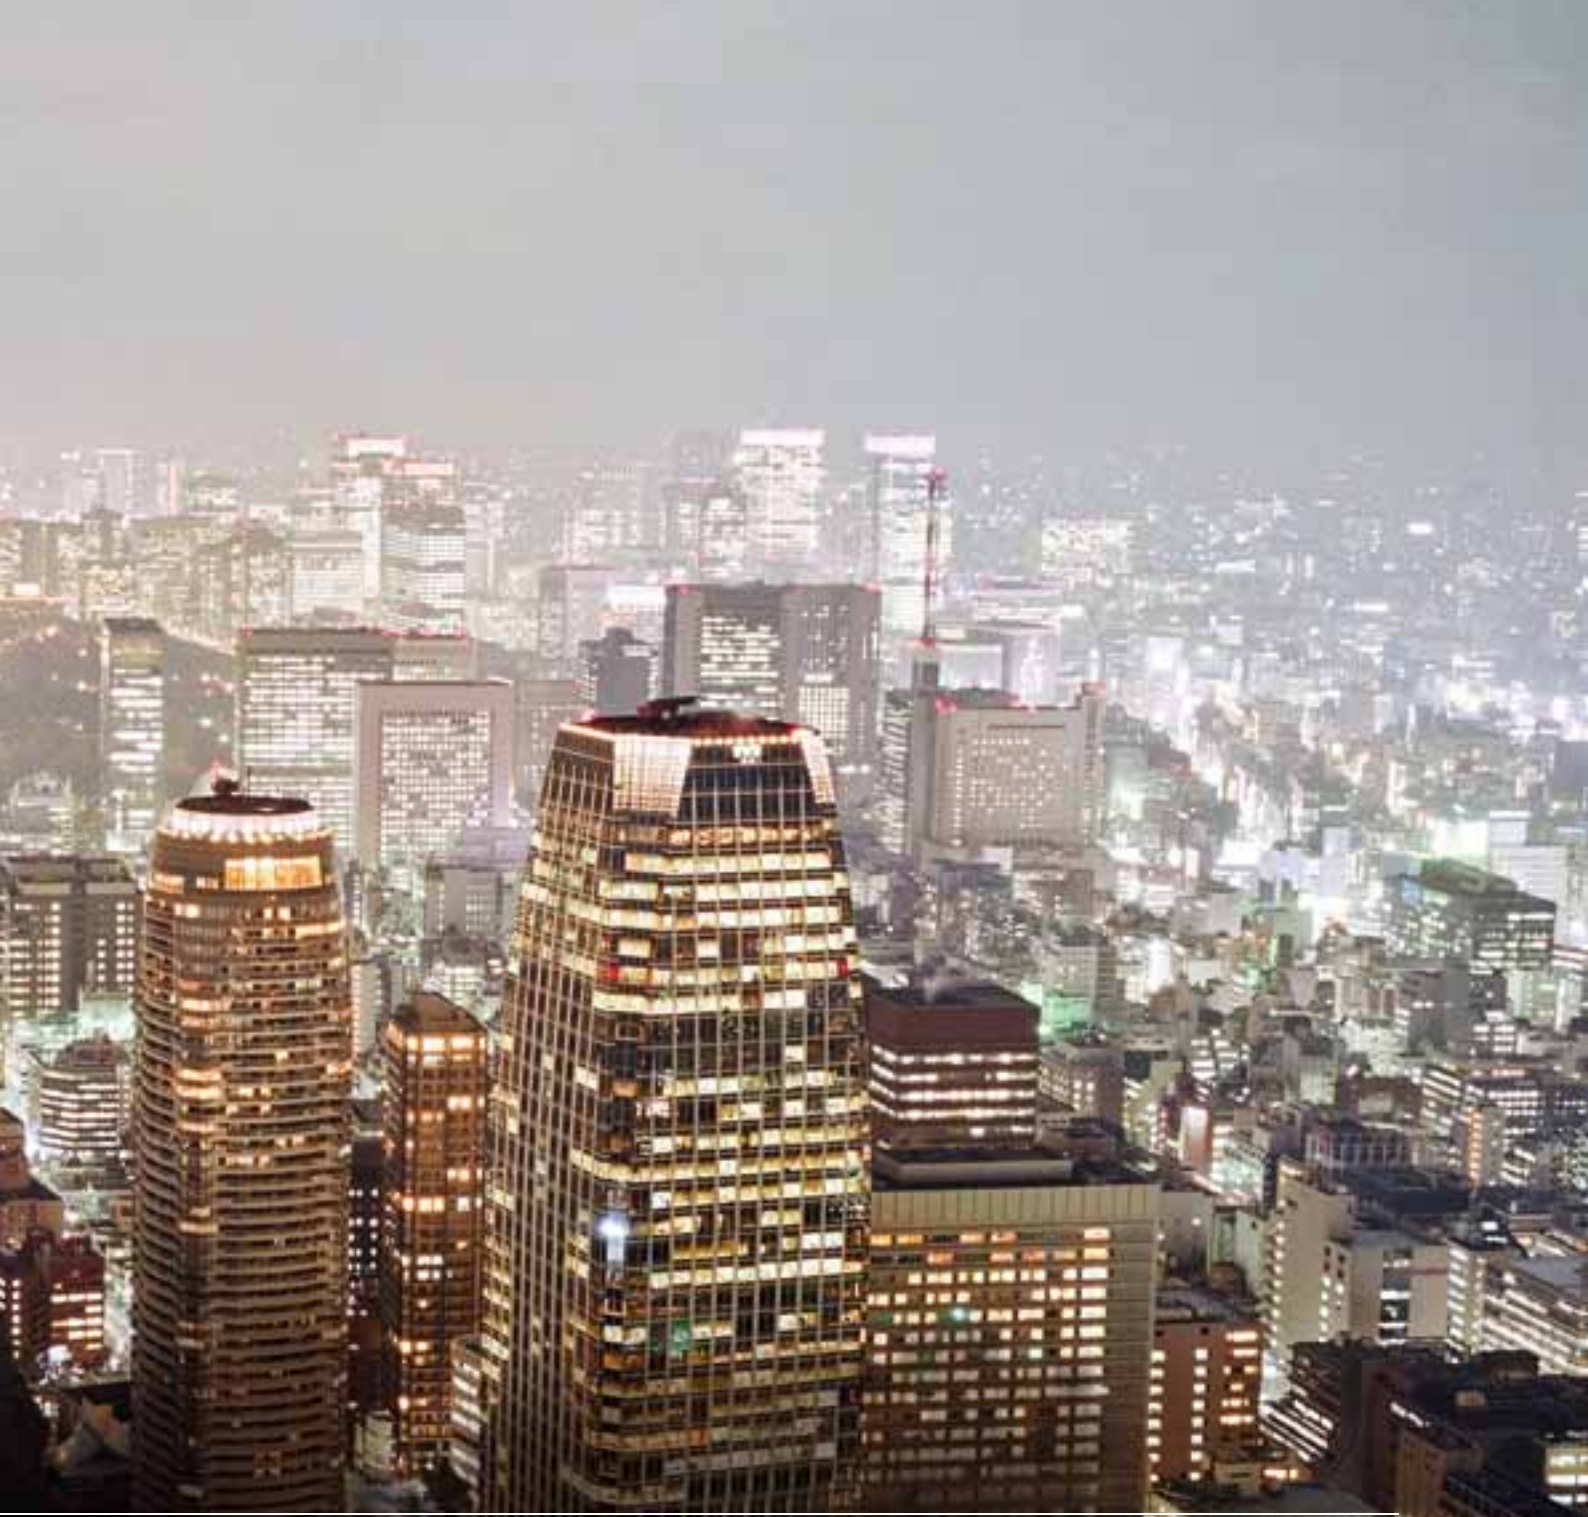

neue, aufstrebende Märkte erobern und  
Lösungen bieten.

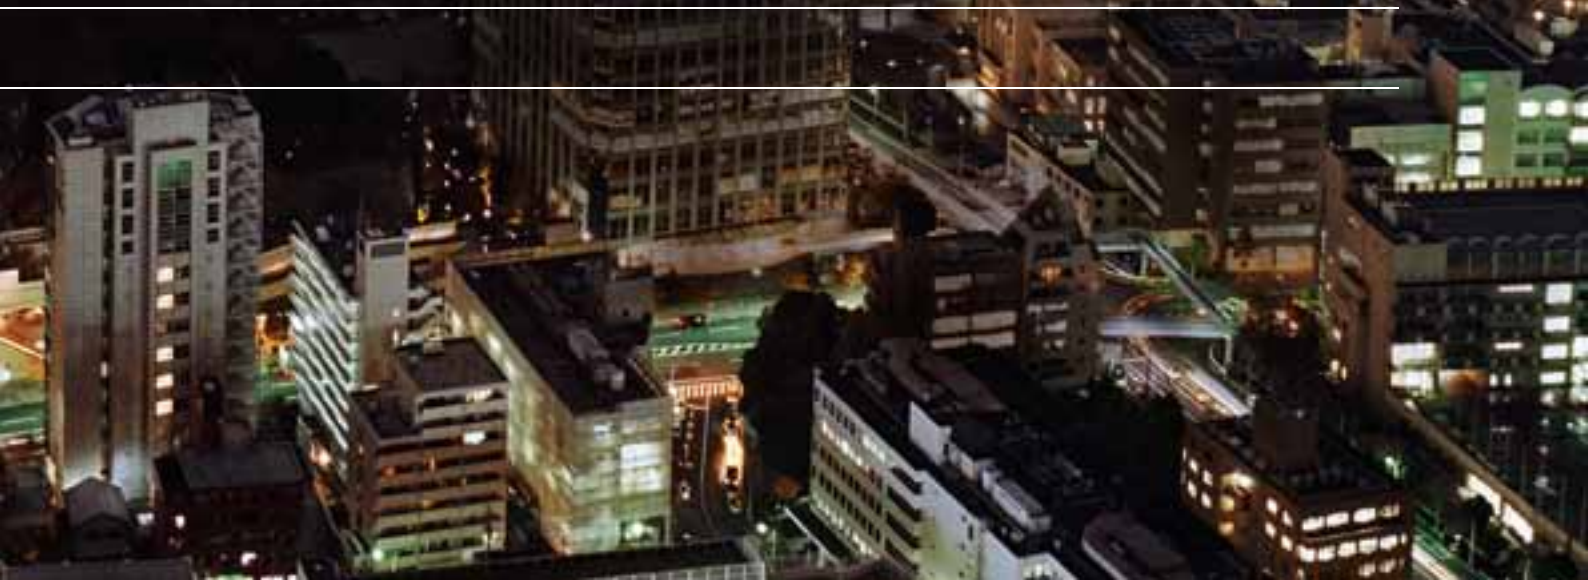





# AufgabenVielfalt.

---

Wer als Autobauer Zukunft gestalten will, muss über  
Und heute Verantwortung übernehmen – für Umwelt,

---

S. 44 ESSAY. MUSICA MOBILE. – S. 70 LEICHT-ATHLETEN. – S. 78 DER DAS LACHEN BRINGT.

---

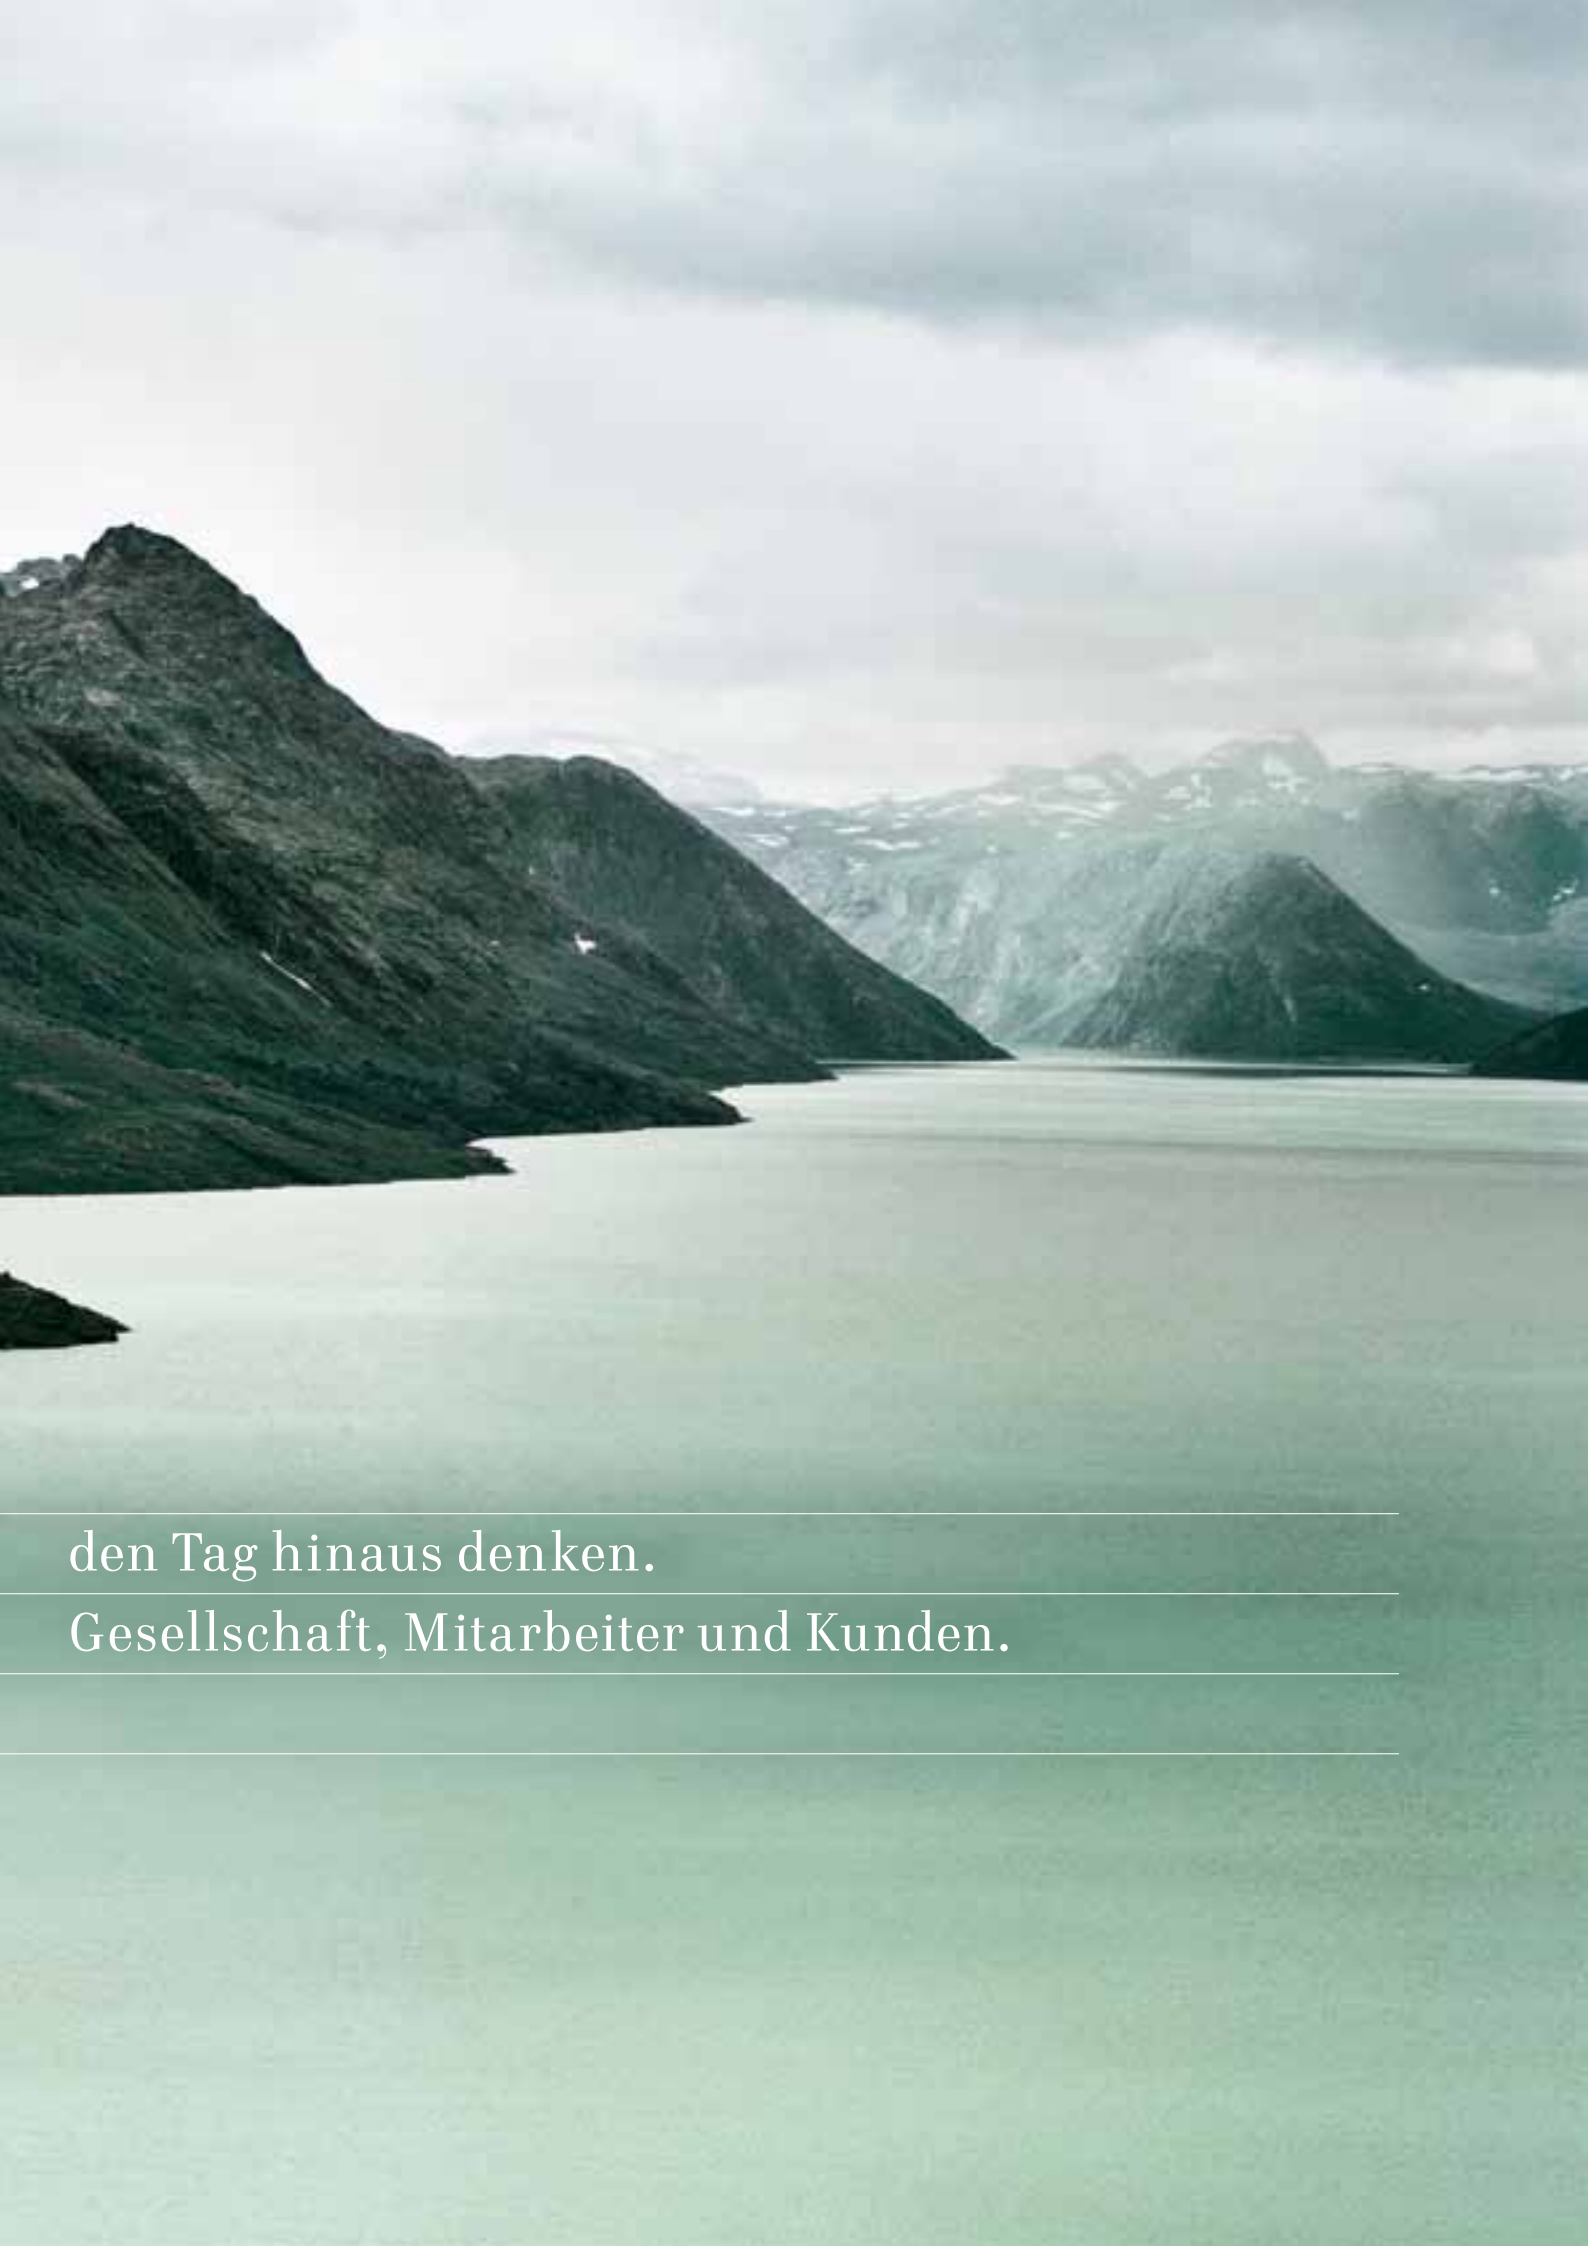

---

den Tag hinaus denken.  
Gesellschaft, Mitarbeiter und Kunden.

---



A satellite with four solar panel arrays is shown in orbit above the Earth's surface. The Earth's curvature is visible, showing a blue and white cloud-covered planet against the blackness of space.

# IdeenVielfalt.

In unseren Forschungslaboren rund um den Globus  
und sie ist intelligenter, vernetzter und vielfältiger

S. 30 FREIE FAHRT. — S. 68 ESSAY. RÄUME BEWEGEN. — S. 88 ESSAY. BEWEGUNG IST LEBEN.

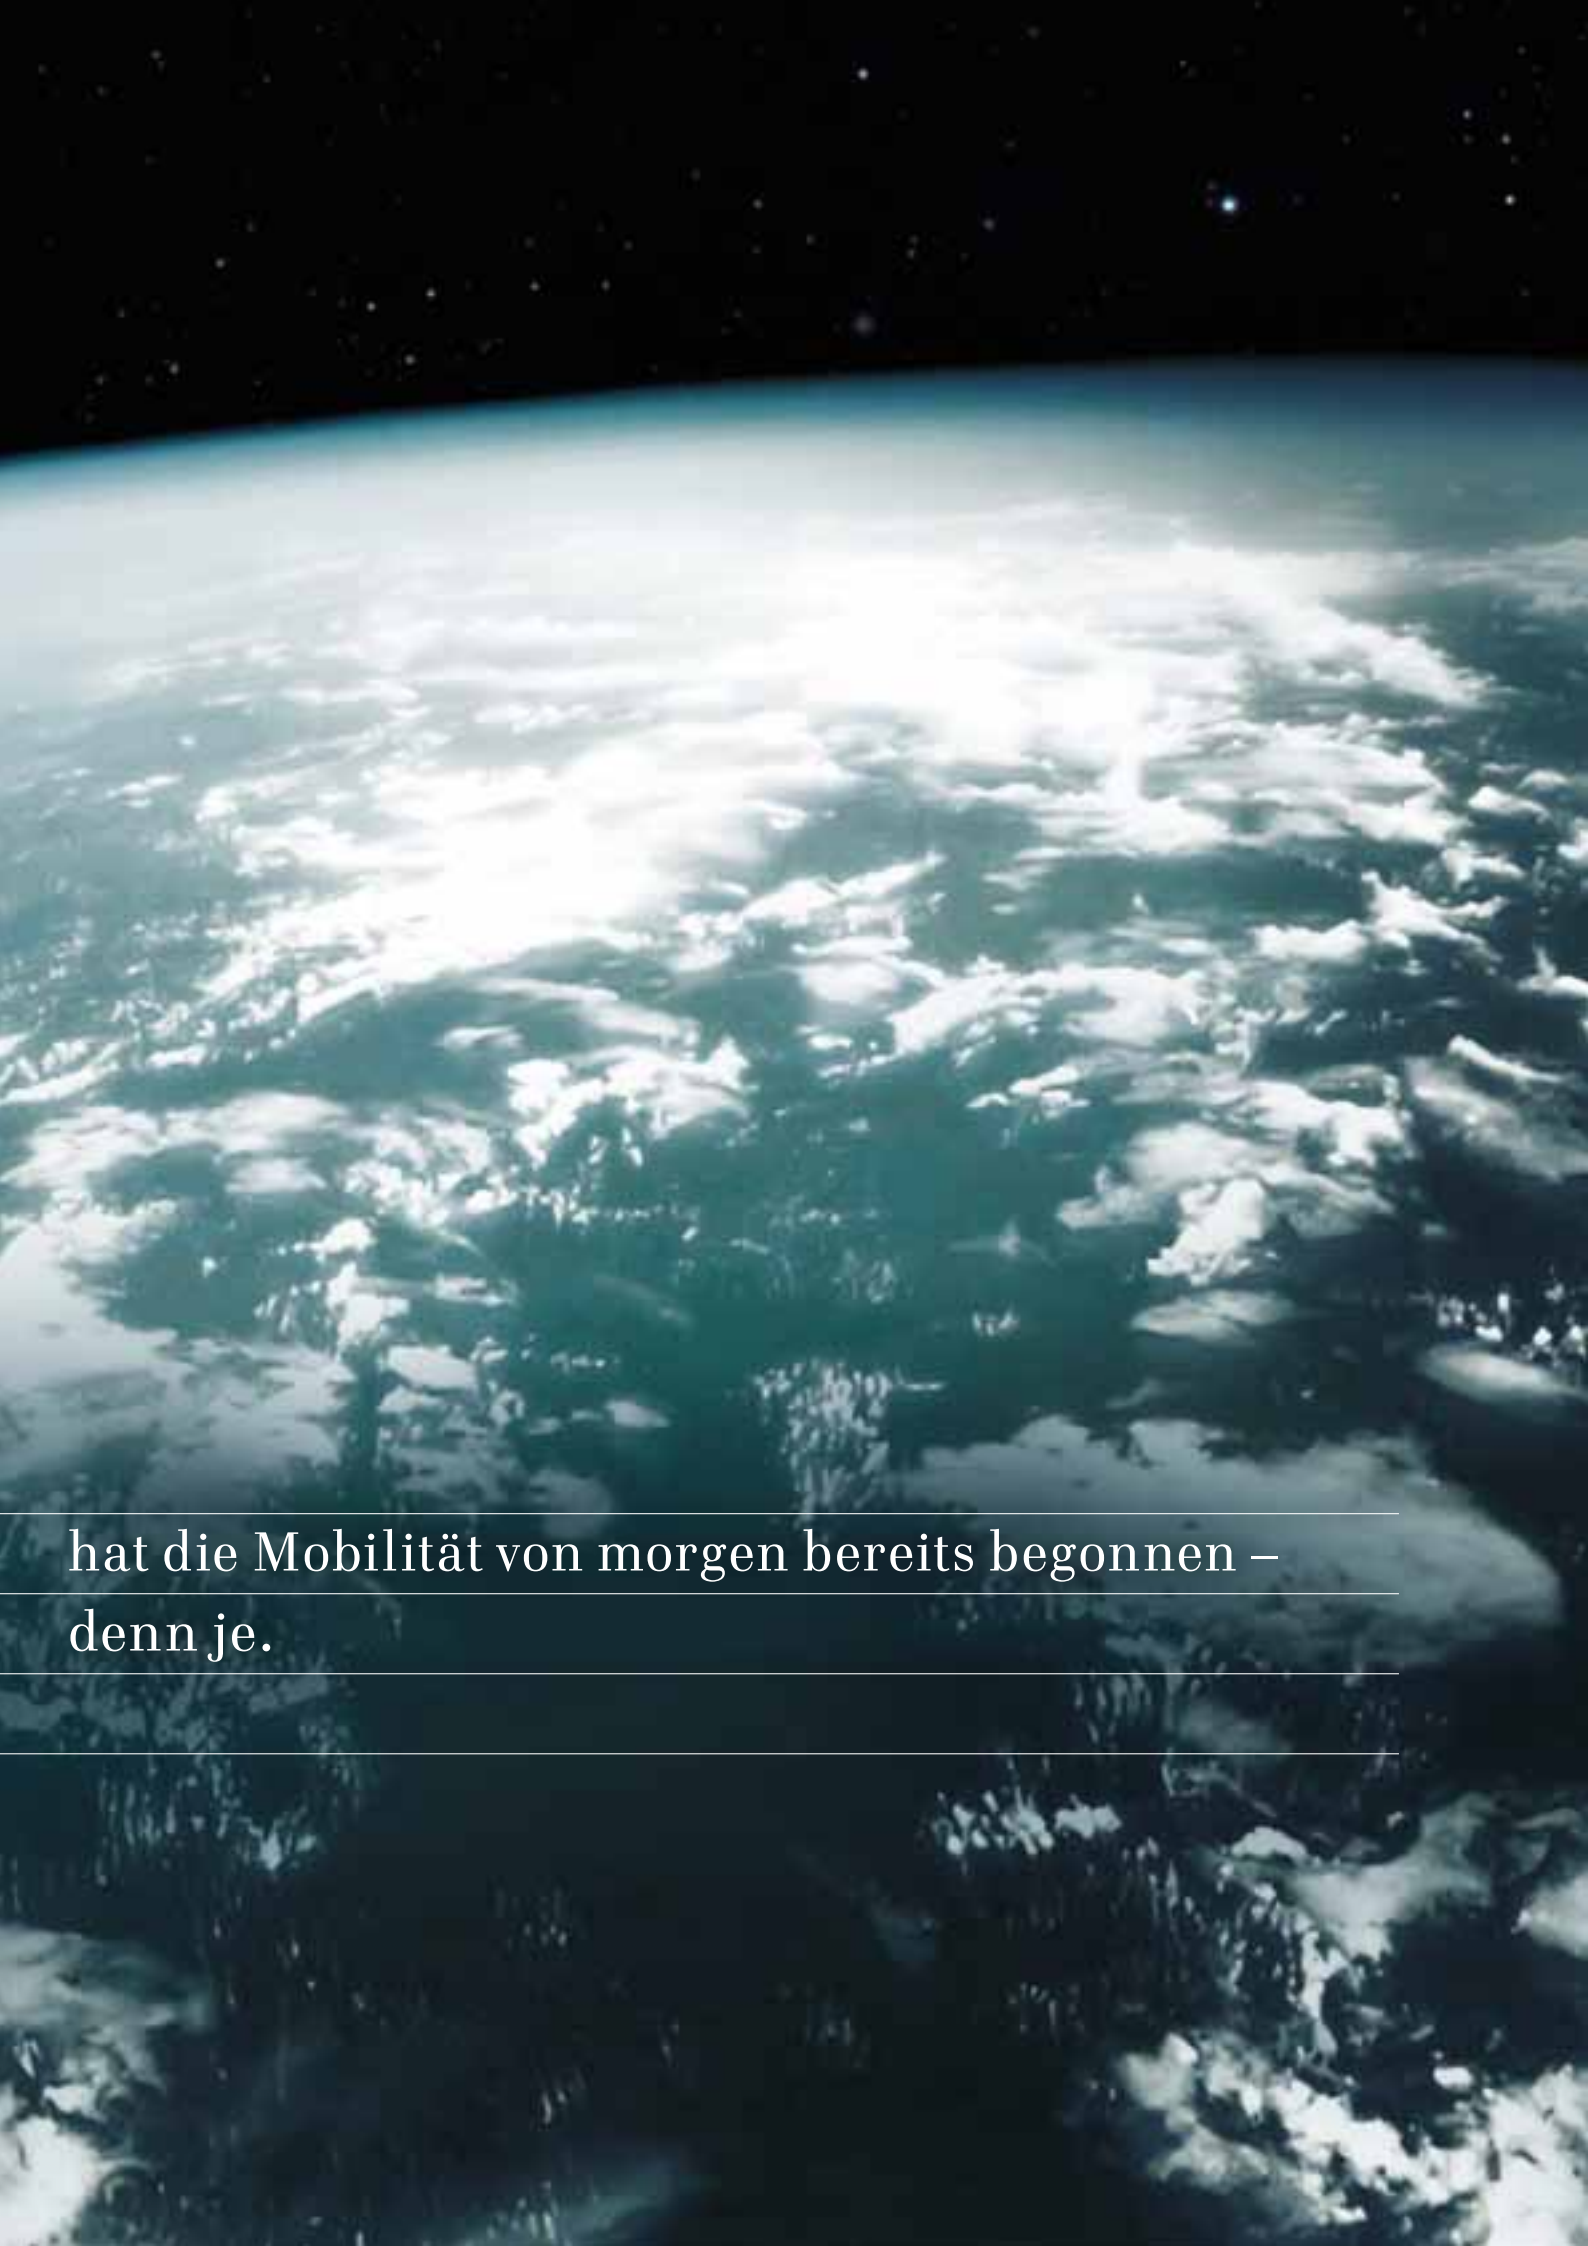

---

hat die Mobilität von morgen bereits begonnen –  
denn je.

---





# AntriebsVielfalt.

Es gibt nicht die eine Lösung für umweltfreundliche technologisch und wirtschaftlich zu beherrschen,

S. 40 TACK! – S. 80 MIT SCHWUNG IN DIE ZUKUNFT.



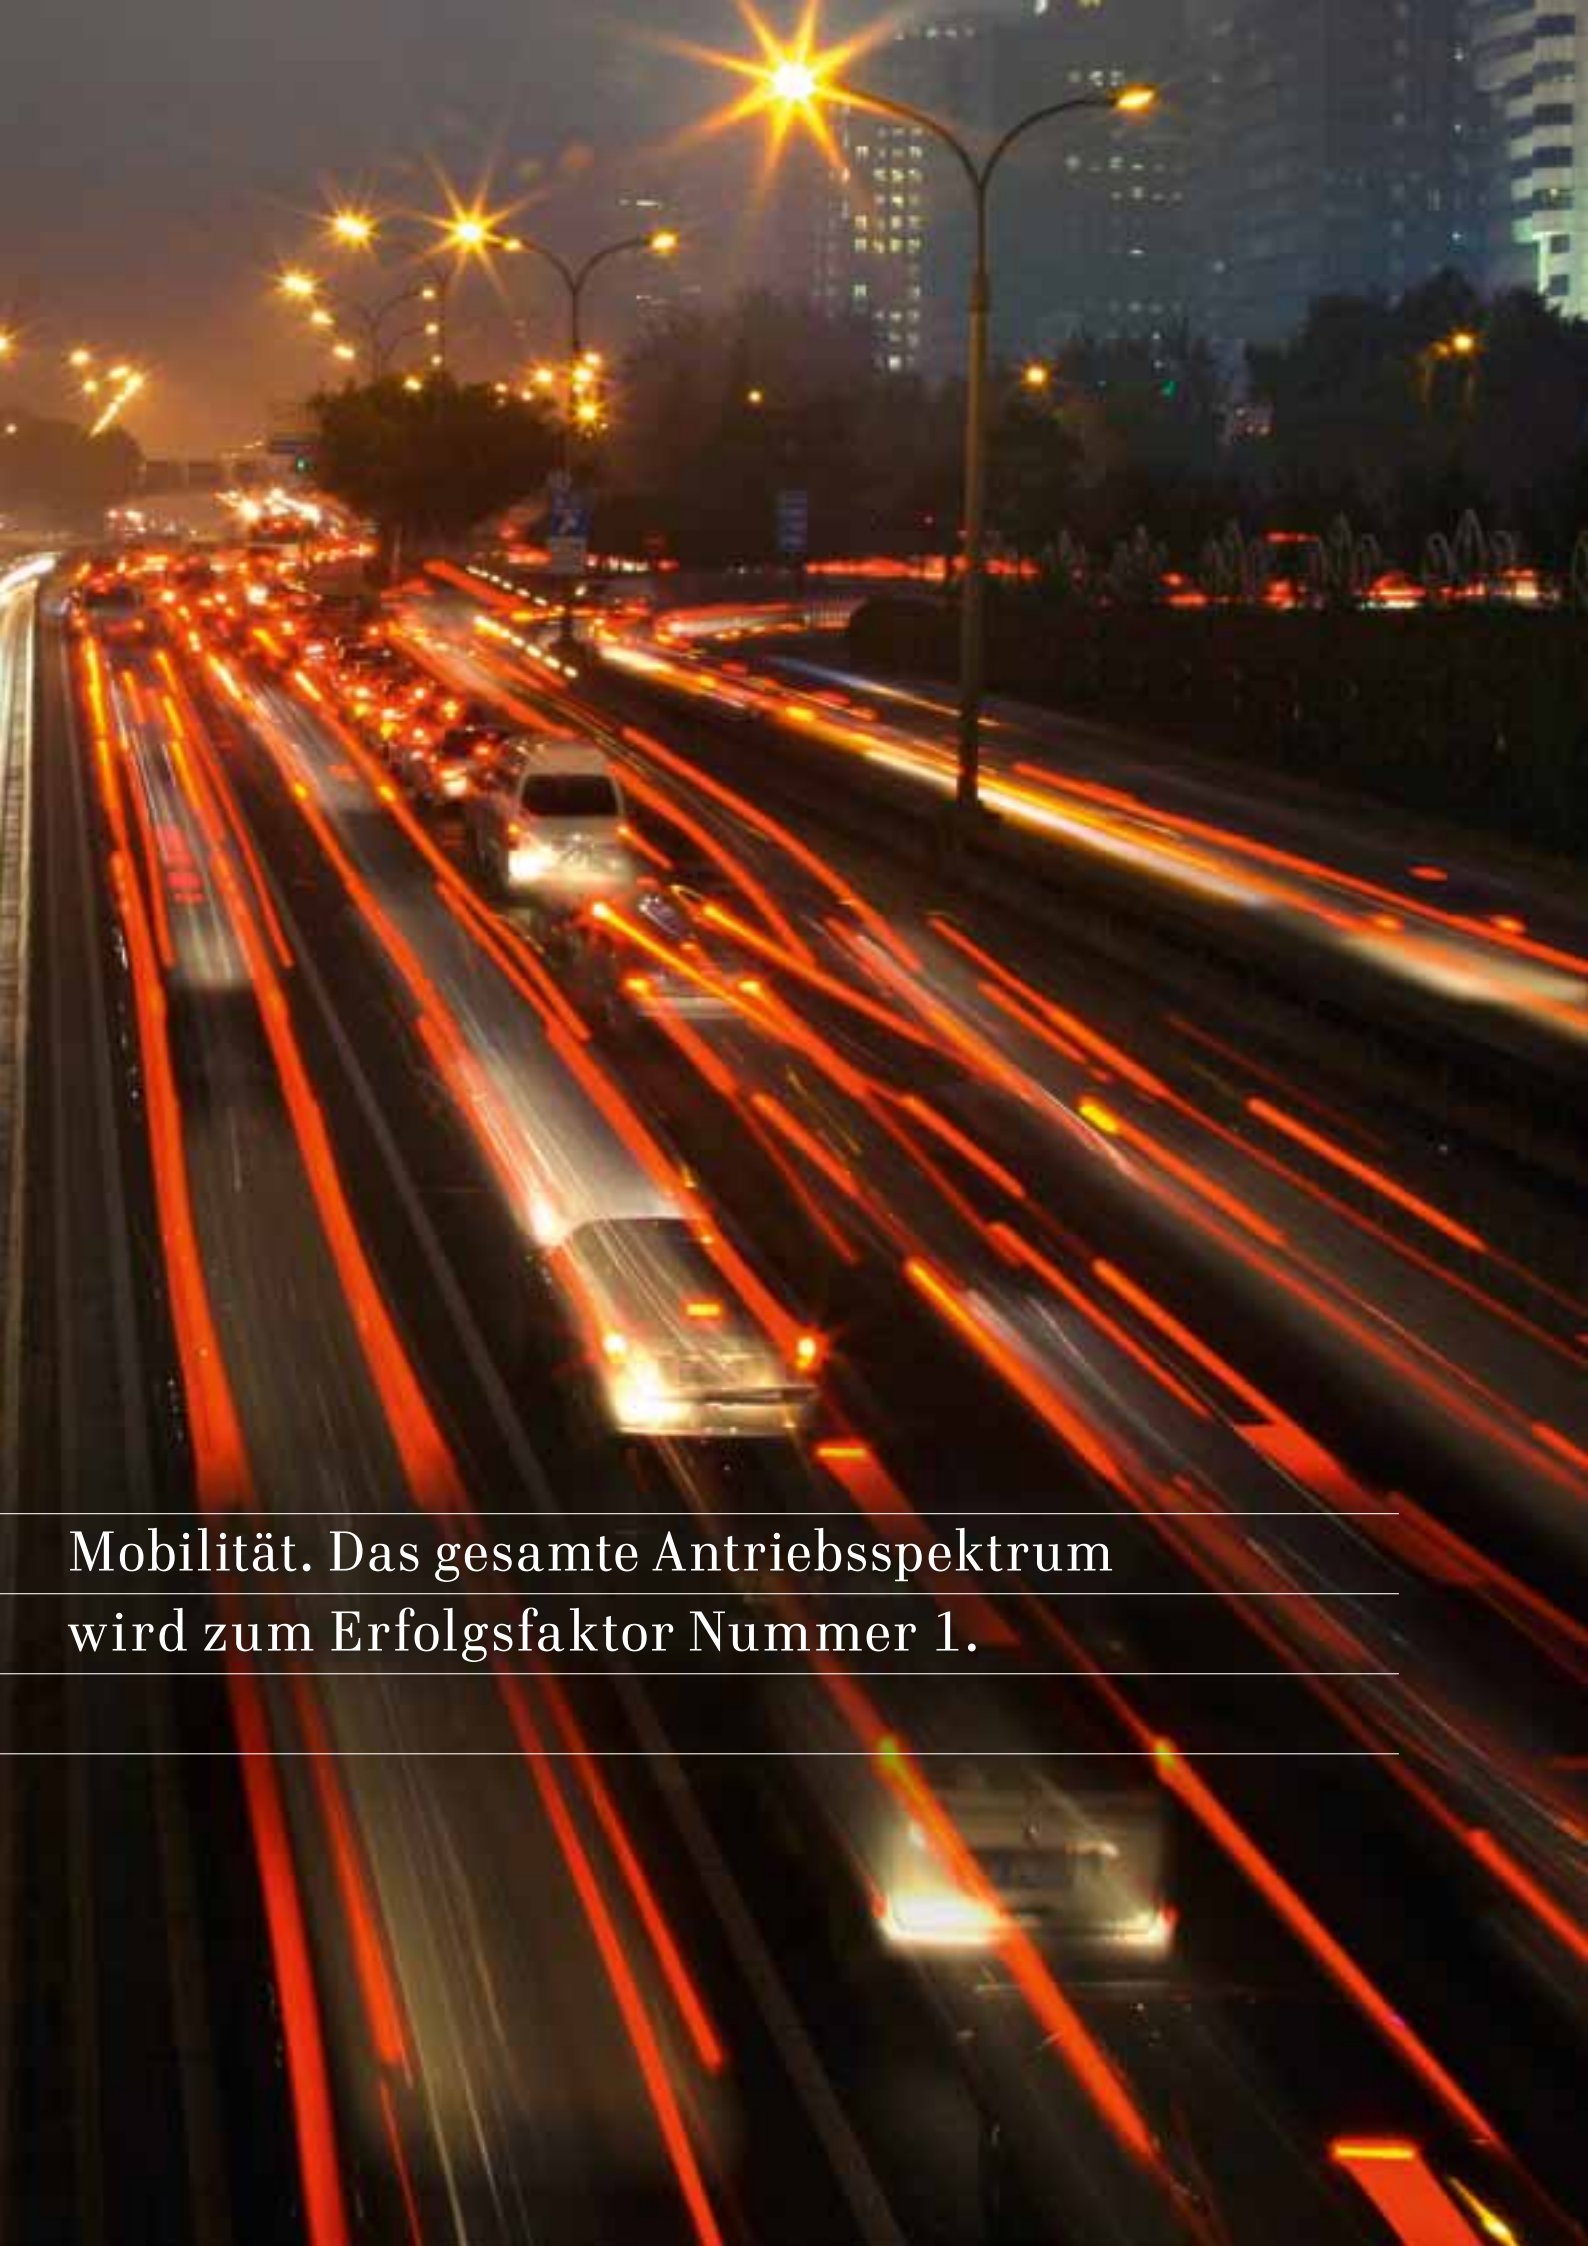

---

Mobilität. Das gesamte Antriebsspektrum  
wird zum Erfolgsfaktor Nummer 1.

---





# StrukturVielfalt.

Die Automobilindustrie steht mitten in einem rasanten  
Strukturen und zielgerichtete Partnerschaften sorgen

S. 16 MISSION ZUKUNFT. – S. 76 BELL'ARTE. – S. 91 MÄRKTE IN BEWEGUNG.

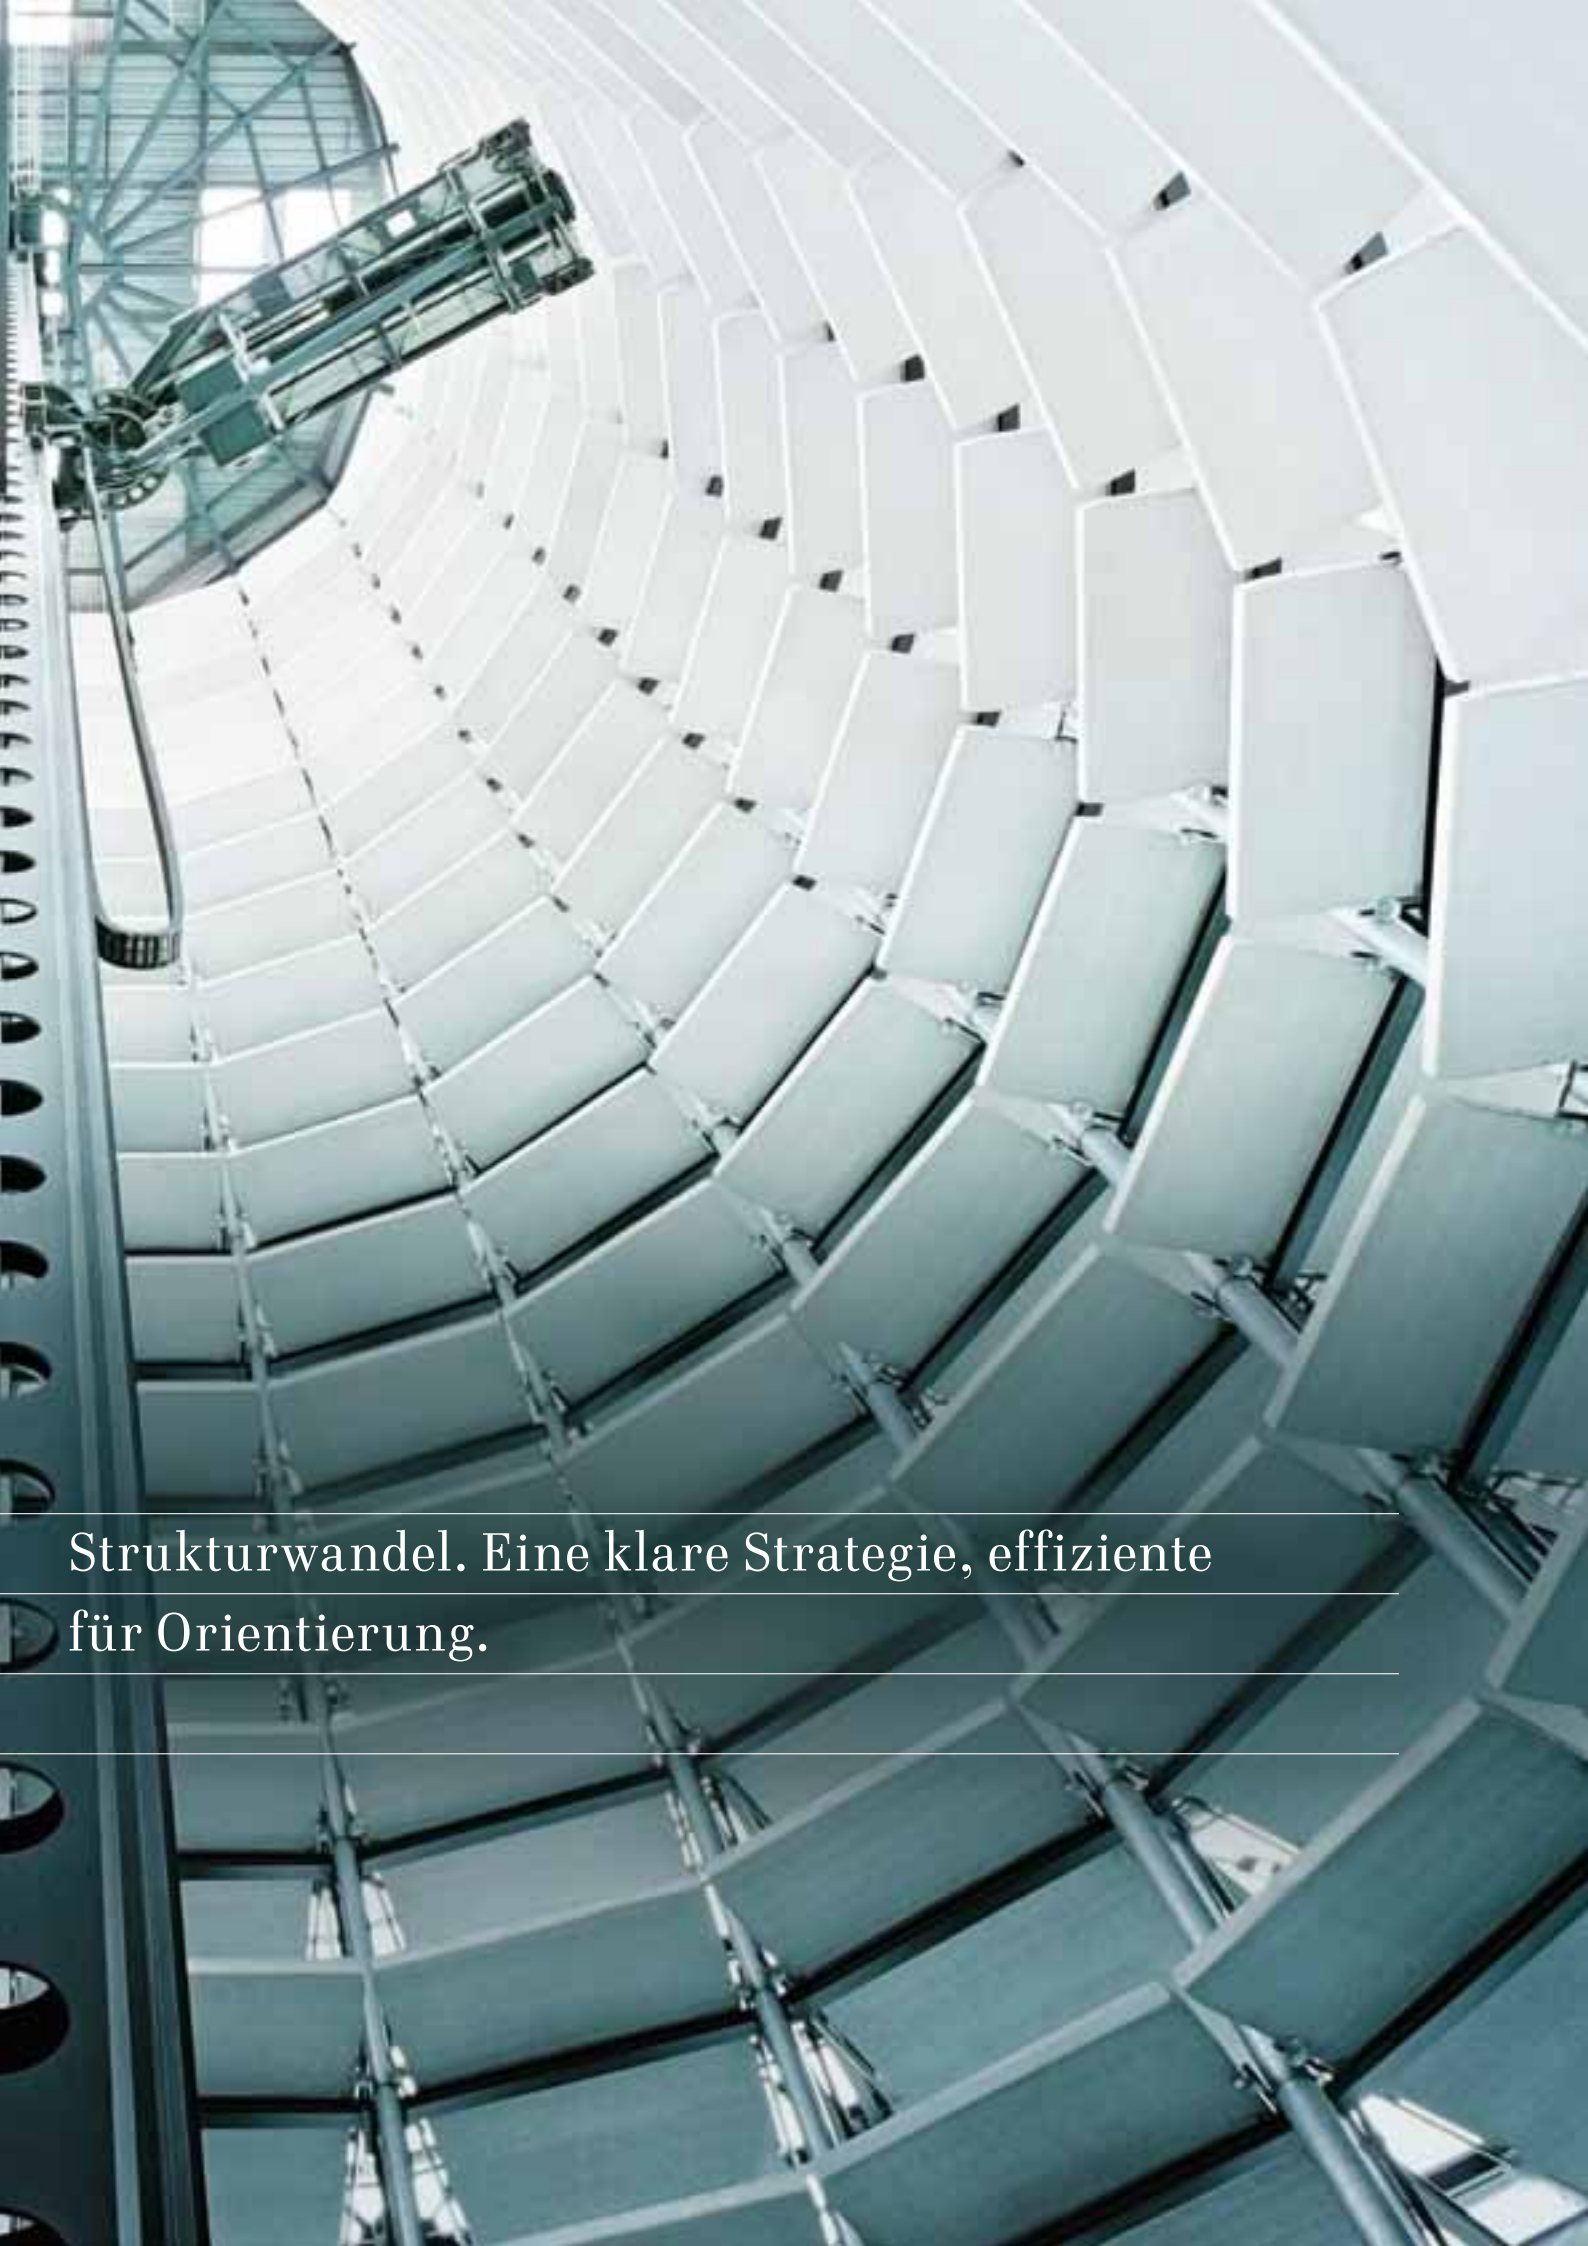

Strukturwandel. Eine klare Strategie, effiziente  
für Orientierung.



## 4 | Vielfalt erfahren.

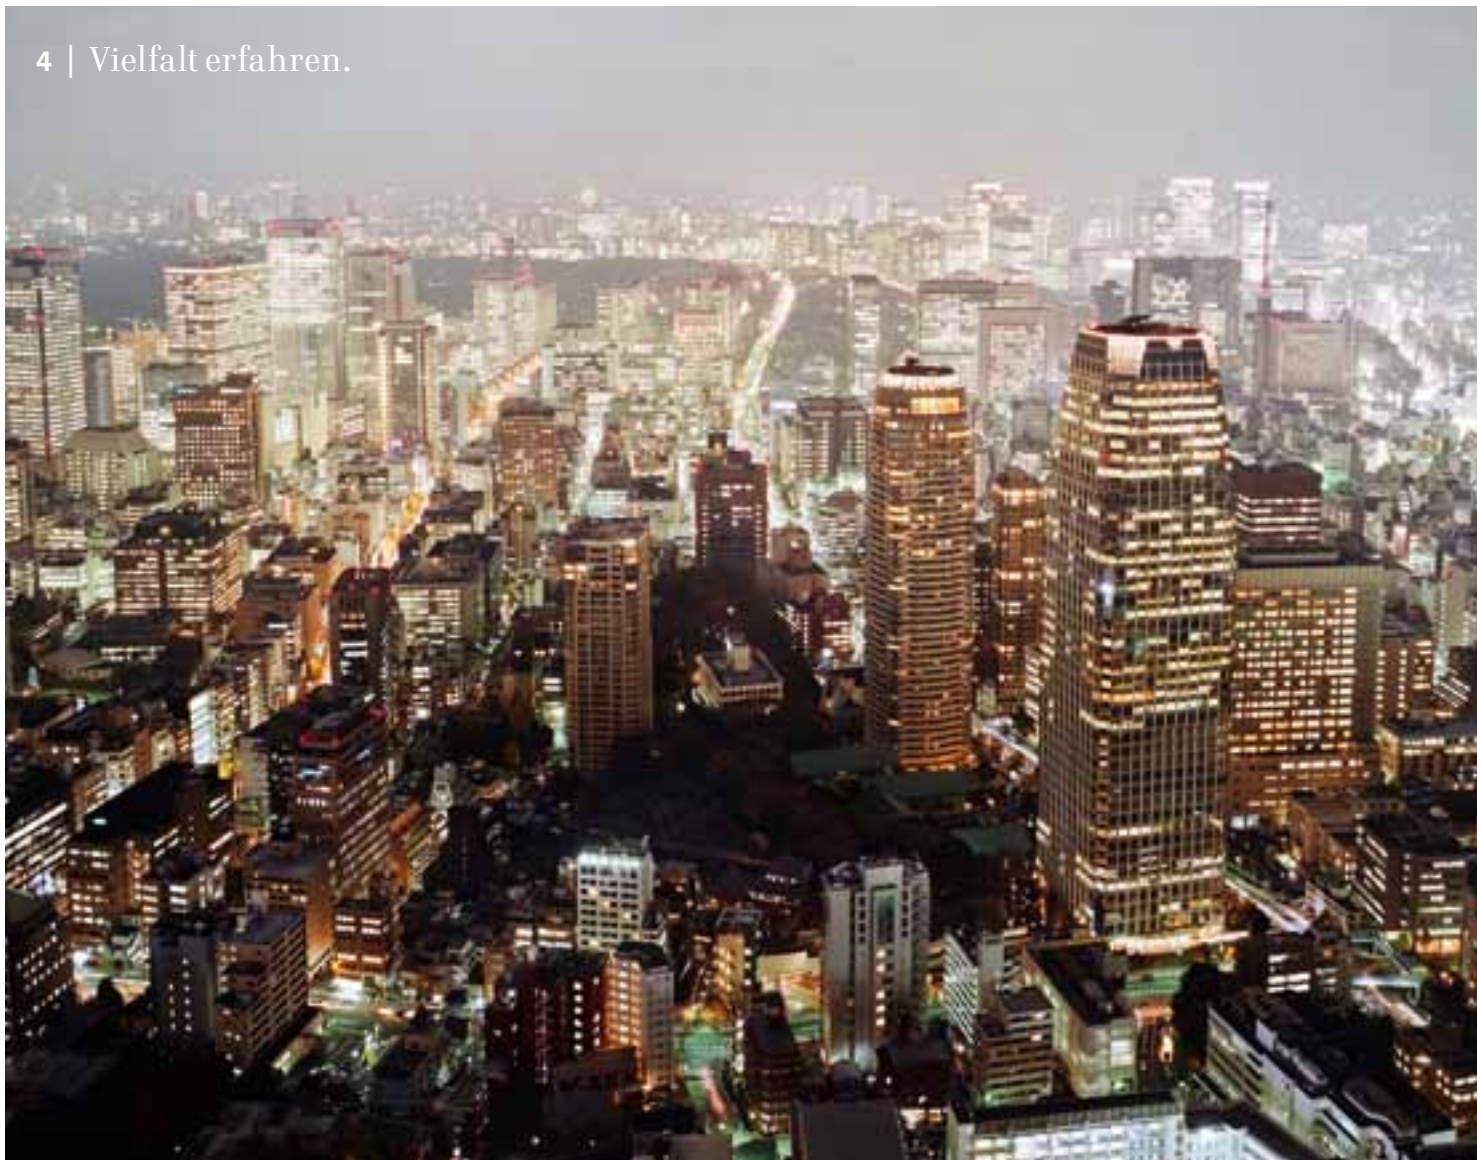

# Inhalt

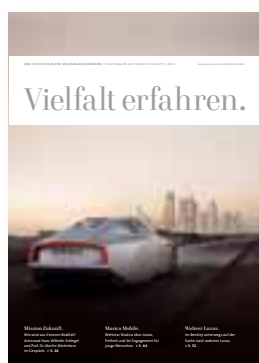

## TITEL

Der Volkswagen XL1 bringt mit seiner Antriebsallianz aus Plug-In-Hybrid und Verbrennungsmotor die Vision vom 1-Liter-Auto in Serien-nähe.

## VIELFALT ERFAHREN. BEWEGUNG.

- 16 **Mission Zukunft.**  
Wie wird aus Visionen Realität? Astronaut Hans Wilhelm Schlegel und Prof. Dr. Martin Winterkorn im Gespräch.
- 24 **Katapult in die Moderne.**  
Bei Volkswagen im russischen Kaluga dreht sich alles um Qualität – ohne Kompromisse.
- 30 **Freie Fahrt.**  
Die Volkswagen Konzernforschung arbeitet an Autos, die keinen Fahrer mehr brauchen.
- 34 **Musik der Metropole.**  
Mit Starpianist und Audi Botschafter Lang Lang im R8 unterwegs in der chinesischen Millionenstadt Guangzhou.
- 40 **Tack!**  
Scania und Stockholm entwickeln den Stadtverkehr der Zukunft.

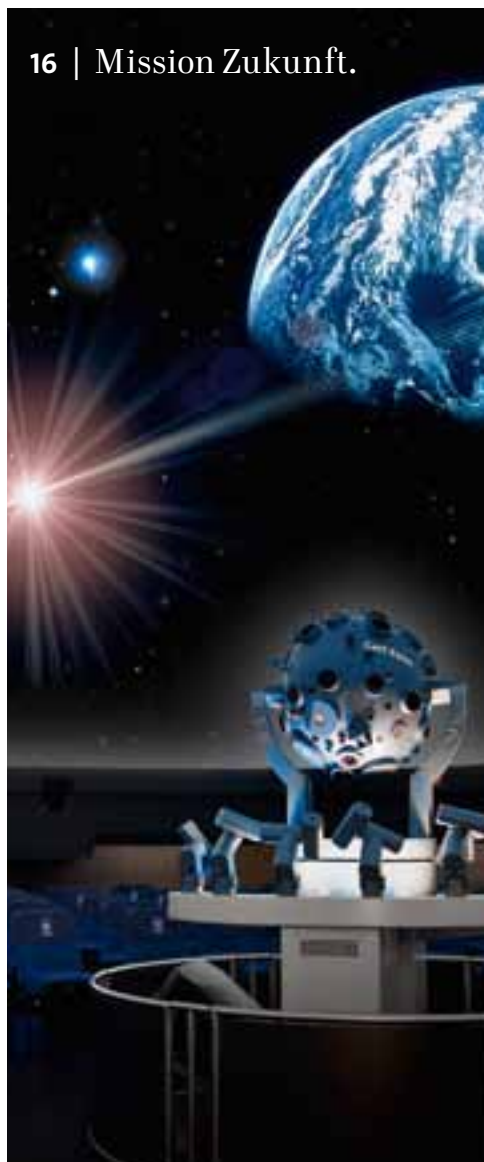

## 16 | Mission Zukunft.

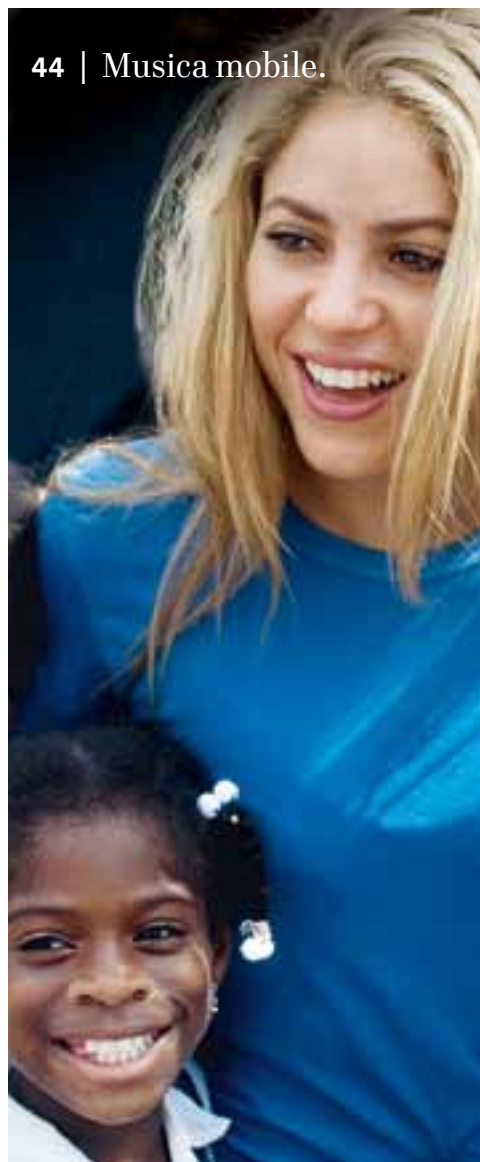

## 44 | Musica mobile.

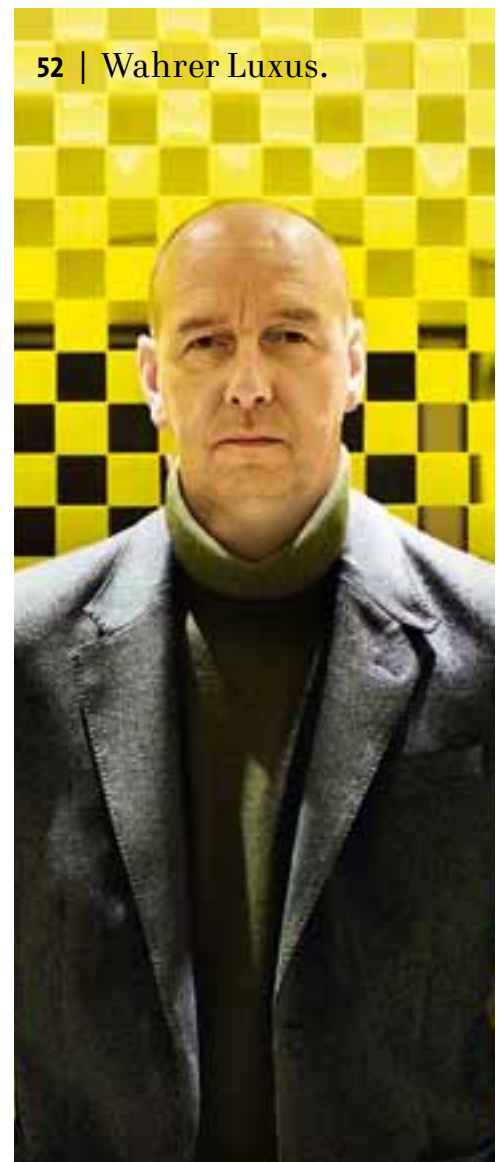

## 52 | Wahrer Luxus.

### 44 **ESSAY. Musica mobile.**

Weltstar Shakira über Autos, Freiheit und ihr Engagement für junge Menschen.

### 46 **Jung geblieben.**

60 Jahre SEAT: Treffen der Generationen in Barcelona.

### 52 **Wahrer Luxus.**

Im Bentley unterwegs auf der Suche nach wahren Luxus.

### 58 **Einer für alle Wege.**

20.000 Kilometer durch Süd- und Mittelamerika mit dem Volkswagen Amarok.

### 62 **Fein abgestimmt.**

Škoda Design und Werkzeugbau: Hüter der Präzision.

### 68 **ESSAY. Räume bewegen.**

Architektin Susanne Schmidhuber über Gleichgewicht im Raum.

### 70 **Leicht-Athleten.**

Das Thema Leichtbau bringt Lamborghini, Golfschläger und den Flugzeughersteller Boeing zusammen.

### 76 **Bell'arte.**

Ein Gespräch mit Italdesign-Gründer Giorgetto Giugiaro.

### 78 **Der das Lachen bringt.**

Verantwortung hört bei Volkswagen Financial Services in Brasilien nicht an der Bürotür auf.

### 80 **Mit Schwung in die Zukunft.**

Porsche definiert die Zukunft der Sportwagen neu.

### 84 **124 Träume.**

Der Bugatti Veyron in der Cité de l'Automobile in Mulhouse.

### 88 **ESSAY. Bewegung ist Leben.**

Hirnforscher Prof. Dr. Ernst Pöppel über Denk-Sport.

## IMPRESSUM

### Herausgeber

Volkswagen AG | Konzern Kommunikation  
Brieffach 1970 | 38436 Wolfsburg | Deutschland  
Telefon +49 (0) 5361 9-0 | Fax +49 (0) 5361 9-28282

### Konzept, Design und Realisation

3st kommunikation, Mainz

### Redaktion | Text

Springer Automotive Media, Wiesbaden

### Lektorat

Textpertise Heike Virchow, Gießen

### Druck

Kunst- und Werbedruck, Bad Oeynhausen  
172.802.488.00 | Printed in Germany

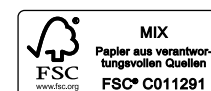

### Fotografie | Bildnachweis

Dominik Butzmann (S. 77) | camimusic (S. 35 rechts) | Claudia Kempf (S. 16 – 17, S. 18, S. 21, S. 23) | Laif (S. 4 – 5, S. 10 – 11) | Ricardo Lisboa (S. 78) | Andreas Mader (S. 24 – 25, S. 27, S. 28, S. 34 – 38, S. 46 – 47, S. 49, S. 50, S. 62 – 63, S. 65, S. 66, S. 68, S. 88) | Hartmut Nägele (S. 6 – 7, S. 52 – 57, S. 84 – 87) | Rüdiger Nehmzow (S. 70 – 73, S. 75) | Shutterstock (S. 8 – 9, S. 40 – 41) | Göran Wink (S. 43) | Volkswagen AG



# Mission Zukunft.

Die Route ist vorgegeben, die Strategie steht: „Wir wollen den Volkswagen Konzern bis 2018 zum führenden Automobilhersteller machen – ökonomisch und ökologisch.“ Der Volkswagen Vorstandsvorsitzende Prof. Dr. Martin Winterkorn ist Perfektionist und kennt den Wert technologischer Exzellenz, aber auch die Bedeutung von Teamwork und Durchhaltevermögen. Tugenden, ohne die ESA-Astronaut Hans Wilhelm Schlegel niemals den Weltraum erreicht hätte. Ein Gespräch über Visionen, Menschen und die Gemeinsamkeiten ihrer Wege.

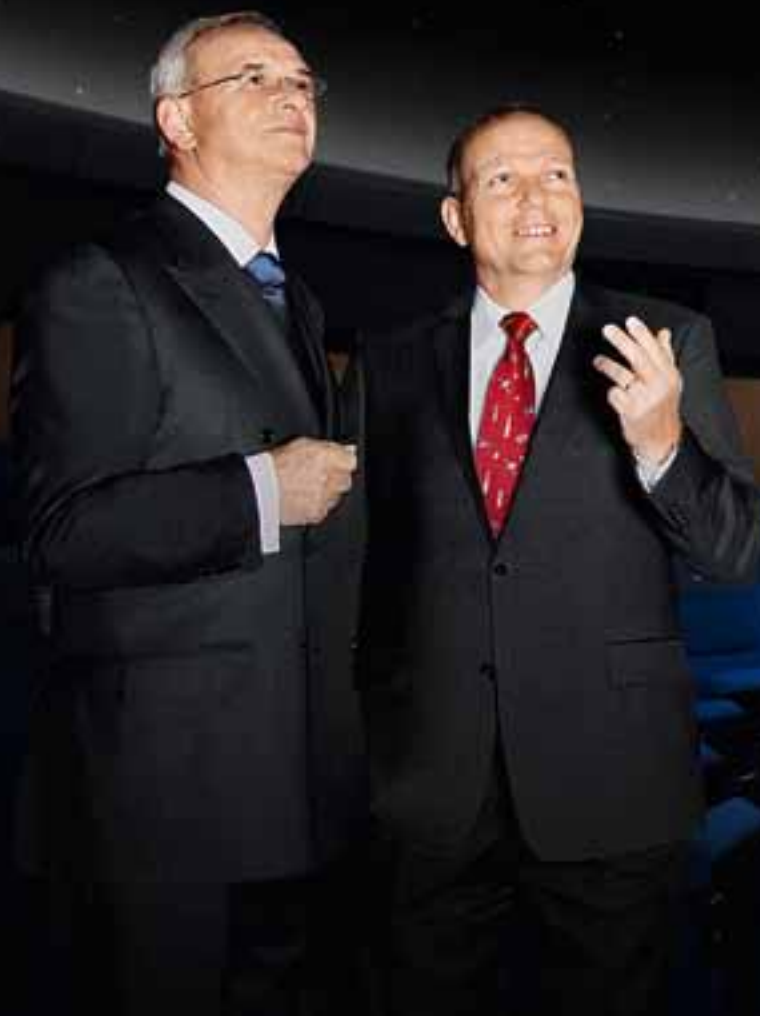



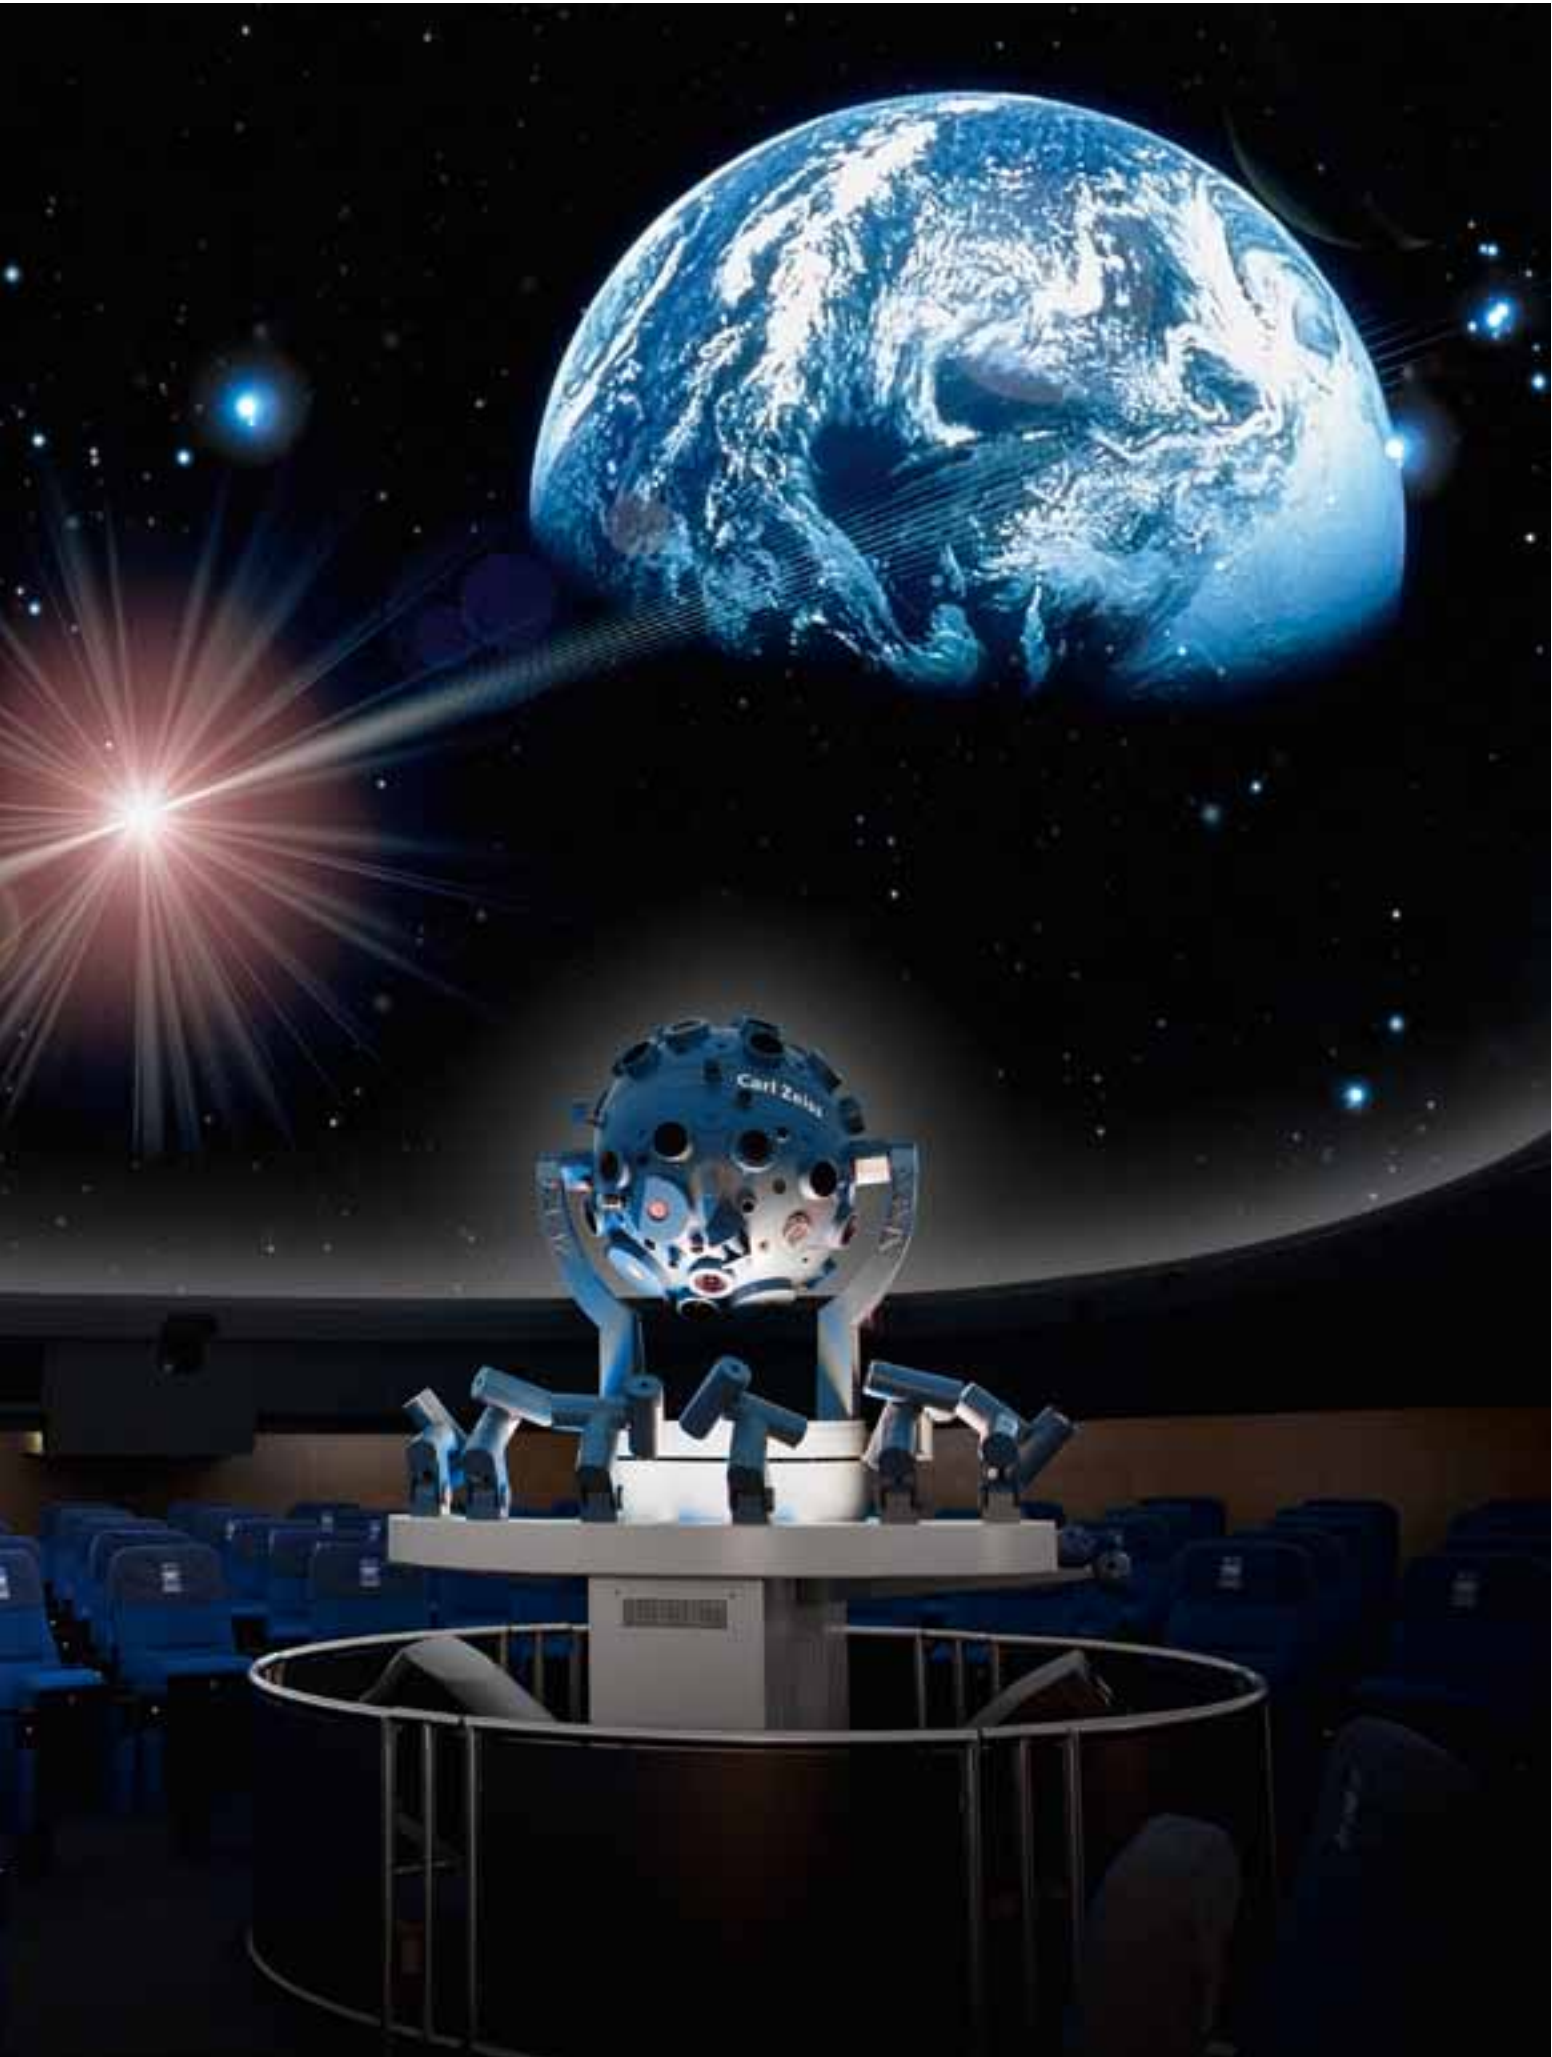

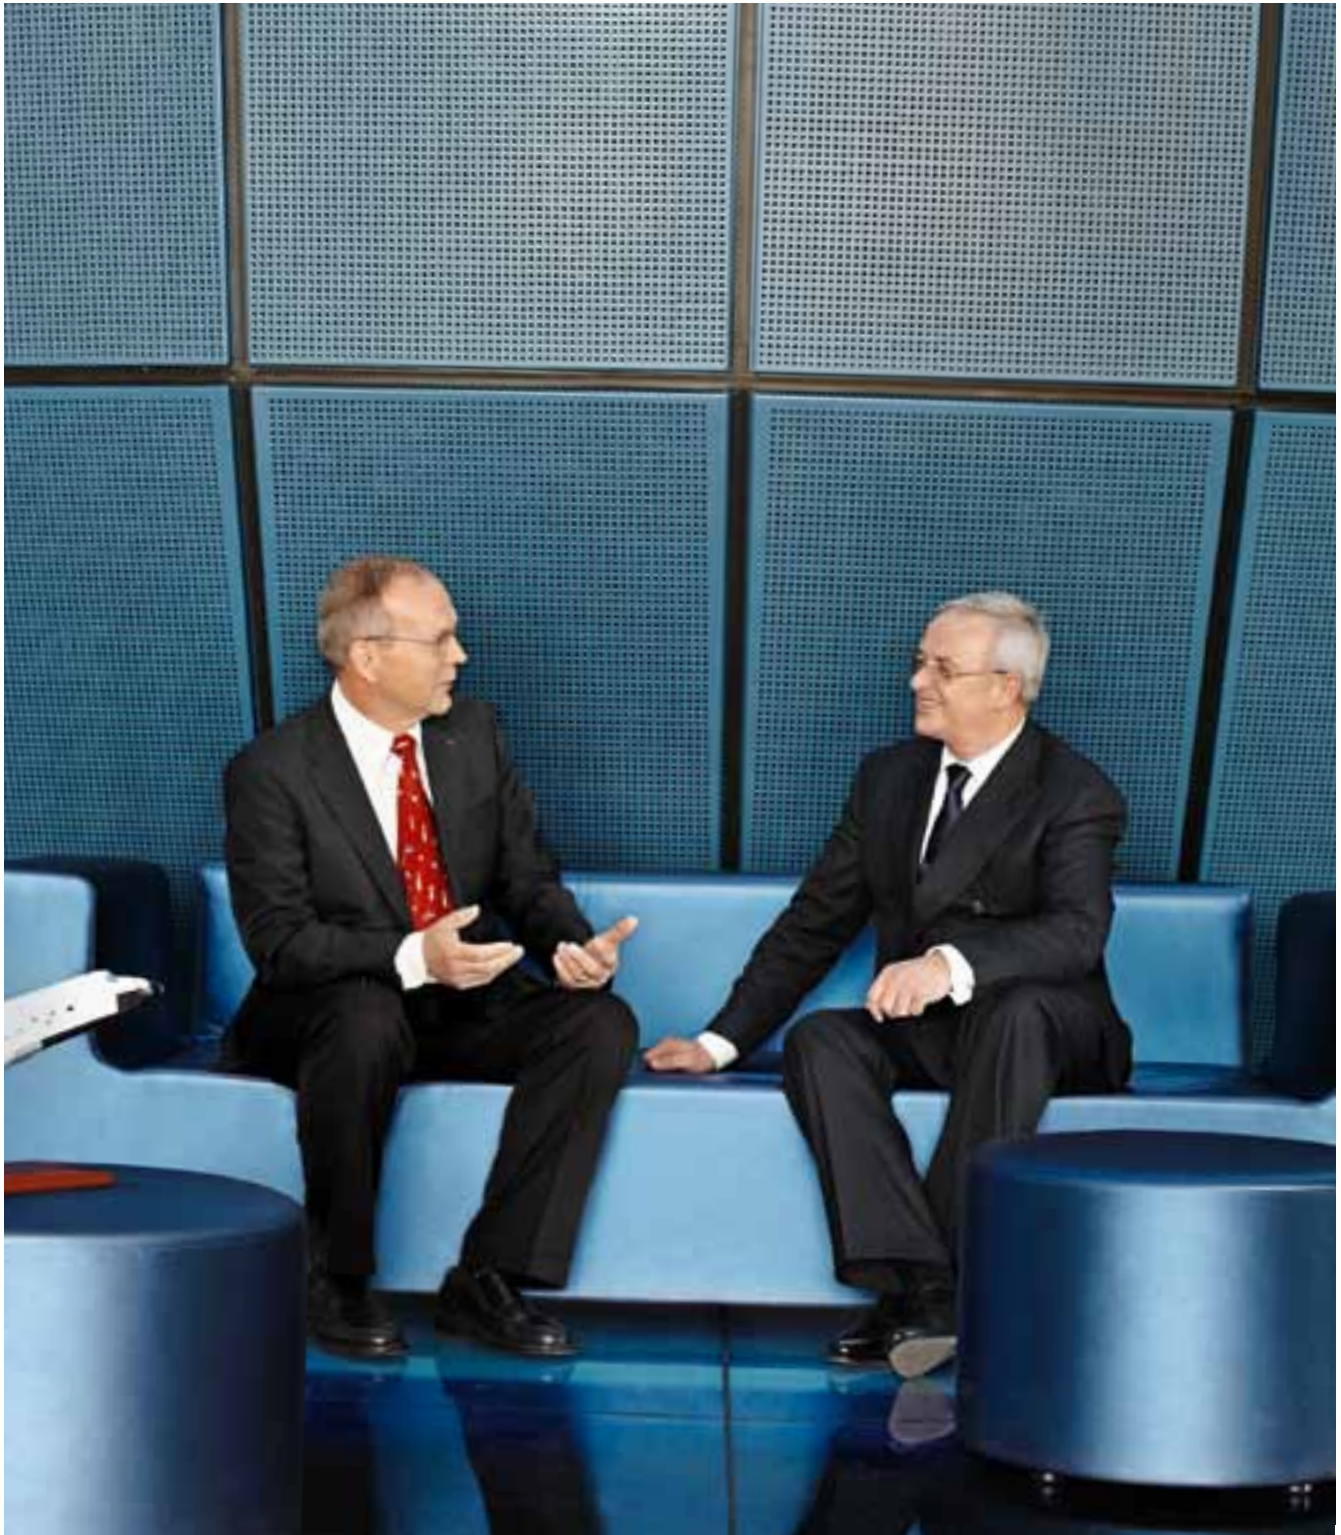

**EINE DENKSCHULE, ZWEI WEGE** – Prof. Dr. Martin Winterkorn, Vorstandsvorsitzender Volkswagen Aktiengesellschaft (rechts), und ESA-Astronaut Hans Wilhelm Schlegel verbindet die Leidenschaft für wissenschaftliche Analytik, gepaart mit praktischer Kompetenz. Den einen führte diese Eigenschaft in den Weltraum, den anderen an die Spitze eines Weltkonzerns.



---

## „Ich spüre heute, dass die ganze Volkswagen Mannschaft hinter unserem vor gut drei Jahren begonnenen Wachstumsplan ‚Strategie 2018‘ steht.“

---

PROF. DR. MARTIN WINTERKORN, VORSTANDSVORSITZENDER VOLKSWAGEN AKTIENGESELLSCHAFT

---

Die Chemie stimmt – und zwar der Physik wegen. Prof. Dr. Martin Winterkorn, Vorstandsvorsitzender der Volkswagen Aktiengesellschaft, und Hans Wilhelm Schlegel, leitender Astronaut der europäischen Weltraumorganisation ESA in Houston, finden schnell eine gemeinsame Gesprächsebene. Es ist ein Treffen zweier Menschen, die mit ihrer naturwissenschaftlichen Ausbildung ähnliche Denkschulen durchlaufen haben. Als Physiker haben beide gelernt, Problemstellungen analytisch zu durchdringen. Winterkorn gilt als Automobilmanager, dem man nichts vormachen kann. Er kennt sich technisch bis ins Detail aus. Schlegel war zweimal im Weltraum und hat dabei auch komplizierte Reparaturarbeiten außerhalb des Raumschiffs übernommen.

Doch die praktische Kompetenz ist nicht die einzige Gemeinsamkeit. Beide sind getrieben von großen Zielen, die sie mit langem Atem verfolgen. Winterkorn arbeitet Schritt für Schritt an der Umsetzung der „Strategie 2018“, die den Volkswagen Konzern zum führenden Autobauer der Welt machen soll. Und Schlegel und seine Kollegen denken schon weit über die aktuellen Missionen auf der Internationalen Raumstation ISS hinaus. Ihr Zukunftsziel heißt Mars.

Der Automann wie der Astronaut müssen internationale Teams aus unterschiedlichen Kulturen zusammenbringen und motivieren. Winterkorn ist verantwortlich für neun Marken, 63 Werke, 153 Märkte und rund 400.000 Mitarbeiter in aller Welt. Schlegel, der im texanischen Houston lebt, absolvierte nicht nur eine US-amerikanische Astronauten-Ausbildung, sondern auch die eines russischen Kosmonauten im Raumfahrtzentrum Swjosdny Gorodok („Sternenstädtchen“) bei Moskau. Er gilt als Meister darin, zwischen verschiedenen Mentalitäten und technischen Kulturen zu vermitteln, und

hat so zur internationalen Zusammenarbeit in der Raumfahrt beigetragen. Beiden geht es darum, den Glauben aller Beteiligten an die jeweilige Langzeitmission auch dann aufrechtzuerhalten, wenn es Rückschläge gibt.

Die Instrumente des Erfolgs – für den Automobilbauer wie für den Raumfahrer – sind langfristige strategische Planung, technologische Exzellenz und ein funktionierendes Team. Für all das braucht man vor allem eins: ein Gespür für die richtigen Menschen auf den richtigen Positionen. Und eine gewisse Bescheidenheit.

Das Wolfsburger Planetarium, in dem sich der Automobil- und der Raumfahrt-Manager treffen, ist ein guter Ort, um sich dessen neu bewusst zu werden. „Eigentlich sind wir alle Astronauten, denn von oben wirkt der Blaue Planet wie ein großes Mutterschiff“, sagt Hans Wilhelm Schlegel beim Blick in die Kuppel des Gebäudes. In diesem Moment geht in der Projektion des Planetariums die Erde über dem Mond auf, so wie es ein Mensch auf dem Mond erleben würde. Zuvor hatte der ESA-Astronaut die Labors der Volkswagen Forschung besucht. Im Gegenzug hinterfragt Martin Winterkorn: „Was ist mit Galileo?“ Nicht nur die Autoindustrie wartet auf das europäische System von Navigationssatelliten.

Im Folgenden sind die spannendsten Passagen des Gedankenaustauschs der beiden Männer dokumentiert – unter anderem sprachen Martin Winterkorn und Hans Wilhelm Schlegel über ...

### ... den Mut, sich große Ziele zu setzen:

PROF. DR. MARTIN WINTERKORN: „Man muss die Menschen mitnehmen. Die Mitarbeiter müssen an das große Ziel glauben. Ich spüre heute, dass die ganze Volkswagen Mannschaft hinter

unserem vor gut drei Jahren begonnenen Wachstumsplan ‚Strategie 2018‘ steht. Das gilt für Deutschland genauso wie für unsere Fabriken in Mexiko, Brasilien oder China – überall wissen die Mitarbeiter, was wir bis 2018 schaffen wollen: Nummer eins bei Qualität und Kundenzufriedenheit sowie bester Arbeitgeber sein, über zehn Millionen Autos pro Jahr verkaufen und eine Konzernumsatzrendite vor Steuern von über acht Prozent erreichen. Dabei geht es uns nicht allein um Größe, sondern darum, der zukunftsfähigste Autokonzern der Welt zu werden. Anfangs haben manche diese Vision für zu mutig gehalten, aber wir zeigen jetzt schon, dass es machbar ist.“

HANS WILHELM SCHLEGEL: „Das beste Beispiel für die Kraft großer Ziele ist die Ankündigung von US-Präsident John F. Kennedy 1961: ‚Wir Amerikaner wollen zum Mond fliegen.‘ Ein unheimlich ehrgeiziges, aber letztlich erfolgreiches Projekt, das wir heute vielleicht gar nicht mehr stemmen würden. Das nächste Ziel lautete: ‚Wir wollen eine internationale Raumstation aufbauen und betreiben.‘ Wir stehen im elften Jahr ihres Aufbaus und kurz vor der Fertigstellung. Ohne diese glasklaren Ziele hätten wir die vielen zigtausend beteiligten Menschen nicht begeistern können. Selbst die stichhaltigsten Argumente verhallen, wenn Sie vergessen, die Menschen zu motivieren, sie zu fesseln und ihnen die Logik des Vorhabens so zu vermitteln, dass sie Ihren Argumenten intuitiv folgen können.“

WINTERKORN: „Wichtig ist für mich dabei Transparenz und Kommunikation. Jedes Jahr organisieren wir in Dresden eine Management-Konferenz mit mehr als 2.000 Teilnehmern aus der ganzen Welt. Da wird gefragt: Wo stehen wir? Wie weit sind wir auf dem Weg zum Ziel? Danach kennt jede Führungskraft – ob aus Shanghai oder Kaluga – den Stand der Dinge. Sie tragen die Informationen in ihre Werke, sodass am Schluss alle Mitarbeiter im Unternehmen einbezogen sind. 2005 haben wir 5,2 Millionen Autos im Jahr produziert, mittlerweile sind es rund 7,4 Millionen. Die Menschen erkennen, welche großen Fortschritte wir machen. Das weckt Begeisterung. Trotzdem dürfen wir uns keinesfalls auf dem Erreichten ausruhen. Wir müssen Angreifer bleiben.“

### ... ihre spezifische Art, Dinge anzupacken:

WINTERKORN: „Als Naturwissenschaftler lernt man, immer noch tiefer zu bohren. Der Volkswagen Konzern ist heute so erfolgreich, weil dieses ‚Tieferbohren‘ Teil unserer Unternehmenskultur geworden ist. Das hilft uns, unsere Autos immer noch besser zu machen. Ich bin überzeugt: Ein Automobilunternehmen muss vom Produkt her geführt werden. Autonom zu sein, heißt aber nicht nur, selbst gern Auto zu fahren, sondern auch, es bis ins Detail zu verstehen. Viele Dinge in unserem Konzern funktionieren heute nur deshalb, weil wir als Vorstand so tief in allen Themen drinstecken. Wenn ein Entwickler sagt, eine Lösung sei technisch, zeitlich oder finanziell nicht möglich, dann kann ich dagegenhalten. Und das weiß jeder.“

SCHLEGEL: „Als Naturwissenschaftler sind wir nur ungern bereit, uns mit dem vorhandenen Erkenntnisstand zufriedenzugeben. Und wir sind stets darauf vorbereitet, eine Überraschung zu erleben. Man muss bei unvorhergesehenen Ereignissen immer wieder offen dafür sein, seine Lieblingstheorie auf den Prüfstand zu stellen.“

WINTERKORN: „Genau so ist es. Die Wahrscheinlichkeitstheorie sagt, wenn ein Ereignis mit einer gewissen Wahrscheinlichkeit eintreten könnte, dann wird es das auch irgendwann. Als Hersteller hochkomplexer Fahrzeuge müssen wir immer mit allem rechnen, ob in der Entwicklung, Produktion oder im Service. Auch Fehlbedienungen gilt es einzukalkulieren, zum Beispiel, dass ein Kunde Bremse und Gaspedal gleichzeitig betätigt. Dann muss die Bremse gewinnen und nicht das Gaspedal. Wir verkaufen im Jahr weit über sieben Millionen Autos. Wenn sich da irgendwo ein noch so kleiner Fehler versteckt, wird er früher oder später im Fahrbetrieb auftauchen. Wir müssen ihn finden, bevor das passiert, und ihn beseitigen.“

SCHLEGEL: „Auch in der Raumfahrt bereiten wir uns sehr intensiv auf solche Sondersituationen vor. Etwa 95 Prozent des Astronautentrainings drehen sich darum. Entscheidend ist, vorausschauend zu denken und zu handeln – das ist bei Volkswagen sicherlich nicht anders. Es gilt, frühzeitig Entscheidungen auf Basis des aktuellen Kenntnisstands und der vorhandenen Ressourcen zu treffen und sich bewusst zu sein, dass fortan alle mit diesen Entscheidungen leben müssen. In der Raumfahrt kann man den Missionsablauf nicht beliebig verlängern oder verändern. ‚Always try to stay in the middle of the envelope‘, sagen die Amerikaner – ‚bleibe in der Mitte des Weges‘. Nur dann bleibt genügend Platz, um nach links oder rechts zu korrigieren.“

### ... neue Technologien und ökologische Verantwortung:

WINTERKORN: „Wir arbeiten intensiv daran, mit neuen Antriebskonzepten technische Grenzen auszureizen und Spielräume zu erweitern. Wir müssen unsere Mobilität und unseren Lebensstandard möglichst ökologisch organisieren. Andererseits, und da spricht vielleicht der Naturwissenschaftler in mir, gilt es auch, bestehende Grenzen zu respektieren. Große technische Entwicklungen wie serienreife Brennstoffzellen-Fahrzeuge wurden in der Vergangenheit allzu leichtfertig für die nahe Zukunft versprochen. Das Gleiche gilt für die Batterietechnologie. Ich halte es für absolut wahrscheinlich, dass alternative Antriebssysteme konkurrenzfähig zu den herkömmlichen sein werden. Nur: Wann genau das der Fall sein wird, lässt sich schwer vorhersagen. Es gilt, immer wieder zu überprüfen, was letztendlich physikalisch sinnvoll und machbar ist und zugleich ökonomisch umsetzbar. Wir gehen alle diese Themen an – und zwar jetzt und heute. Wer hätte beispielsweise vor zehn Jahren vorausgesehen, welche enormen Fortschritte die Elektronik macht?“



„Unsere Welt ist nichts anderes als ein großes Raumschiff. Diese Sichtweise weitet den Blick für die internationale Zusammenarbeit, die erforderlich ist, um globale Probleme zu lösen.“

HANS WILHELM SCHLEGEL, LEITENDER ASTRONAUT DER EUROPÄISCHEN WELTRAUMORGANISATION ESA IN HOUSTON

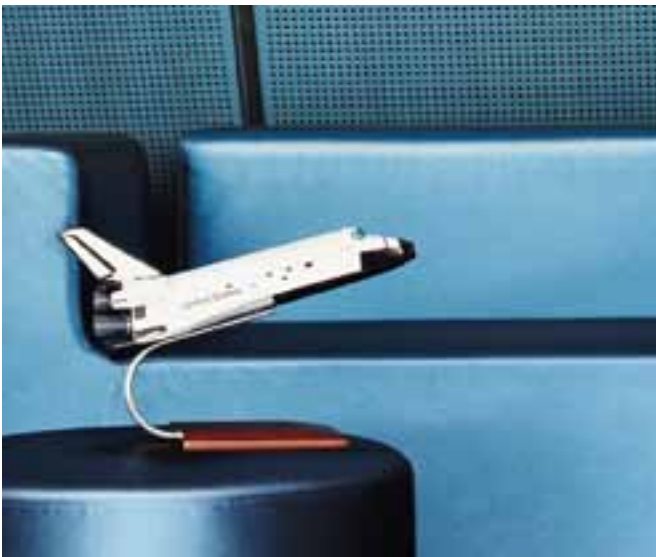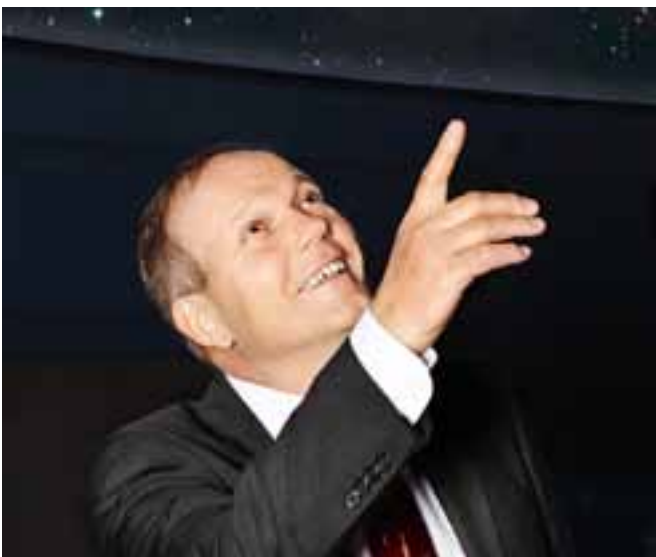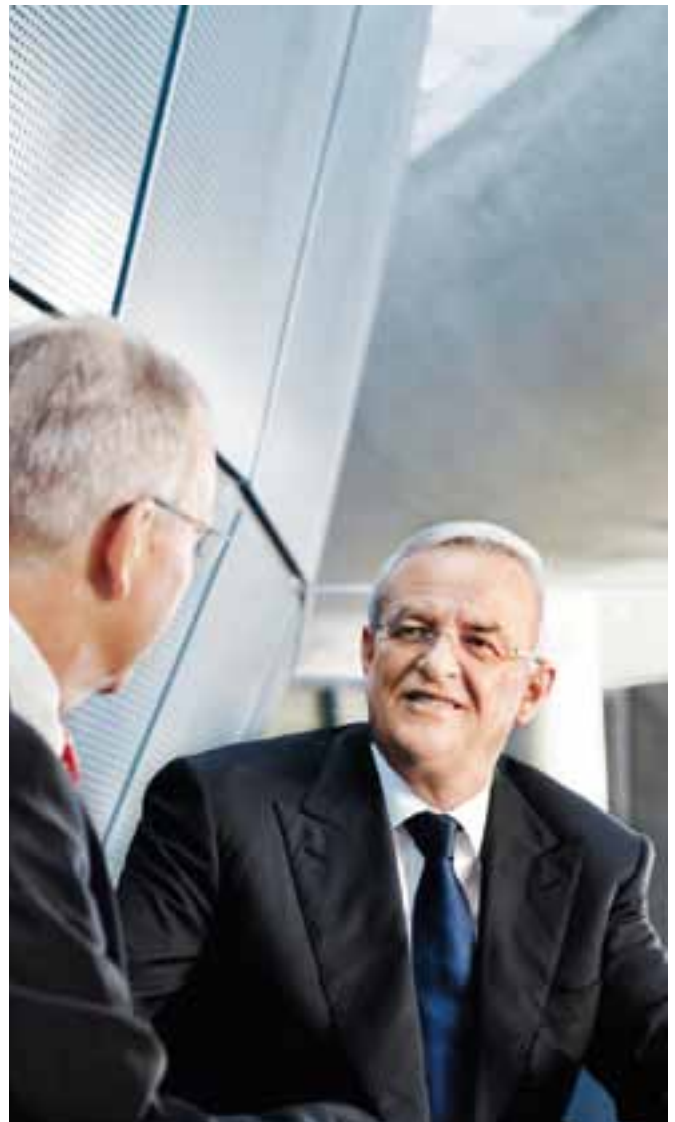

SCHLEGEL: „Wir müssen uns immer im Klaren darüber sein, dass der Bereich, in dem wir den kommenden Fortschritt vermuten, von unserer momentanen Sichtweise geprägt ist. Ob unsere Erwartungen dann tatsächlich eintreffen, kann niemand wirklich wissen. Vielleicht übertragen wir ja Erkenntnisse aus anderen Technologiefeldern, oder verschiedene Disziplinen wachsen unerwartet zusammen. Nehmen Sie das Beispiel Mechatronik. Hier verschmelzen mechanische, elektronische und informationstechnologische Elemente in hocheffizienten Systemen. Wir müssen offen bleiben für überraschende Lösungen.“

WINTERKORN: „Völlig richtig. Und ich bin überzeugt, dass wir in den nächsten Jahrzehnten noch deutlich effizientere Technologien finden, um zum Beispiel die Sonnenenergie zu speichern und zu nutzen. Bei allem, was wir heute verwenden, egal ob Erdöl, Gas oder Biokraftstoffe, handelt es sich letztlich um gespeicherte Sonnenenergie. Unsere derzeitigen Energieresourcen sind endlich. Das führt ja unter anderem zum Langzeitziel in der Raumfahrt, den Mars zu besiedeln.“

SCHLEGEL: „Ja, genau, Energie ist das Kernproblem, obwohl prinzipiell genügend davon auf der Erde vorhanden ist. Aber wie können wir diese Energie einfangen? Ist die Infrastruktur dafür vorhanden? Da kommt auch die Gestaltungsaufgabe der Politik ins Spiel. Unsere Welt ist nichts anderes als ein großes Raumschiff, dessen Mannschaft sich auf gemeinsame Ziele einigen muß, damit diese überhaupt erreichbar werden. Diese Sichtweise weitet den Blick für die internationale Zusammenarbeit, die erforderlich ist, um globale Probleme zu lösen.“

### ... die Kunst, das richtige Team zu finden und zu führen:

WINTERKORN: „Wichtig ist, dass man einander vertraut, dass keine Grabenkämpfe stattfinden. Die Mitarbeiter schauen ganz genau: Können die miteinander? Sobald Spannungen spürbar werden, übertragen die sich auf alle Ebenen. Gerade in der Zusammenarbeit in einem so internationalen Konzern wie unserem sind Respekt und Teamgeist wichtige Voraussetzungen für eine konstruktive Zusammenarbeit. Es gilt, menschlich fair miteinander umzugehen, nicht beleidigend, nicht verletzend. Sachdiskussionen müssen aber durchaus scharf geführt werden. Sonst kommt man nicht zum Ziel.“

SCHLEGEL: „Wir lernen im ISS-Projekt, international zum Nutzen aller zusammenzuarbeiten. Ich persönlich hoffe, dass auch die Chinesen noch dazukommen. Letztlich braucht es für den Erfolg eine Mannschaft mit vielfältigen Talenten, die den Kompromiss dem Rechthaben vorzieht, weil es dem Produkt dient. Bei Ihnen ist das ein Auto, bei uns ist es die Mission. Die Zusammenarbeit in einem Team läuft nicht nach dem Motto ‚Einmal hat es funktioniert, jetzt funktioniert das immer.‘ Man muss stets genau verfolgen, wie der Anstoß, den man gegeben hat, umgesetzt wird. Das klingt nach Kontrolle, aber für mich ist das nichts anderes als gute Führung.“

WINTERKORN: „Wenn Dinge nicht funktionieren, obwohl alle Vorbereitungen für einen ‚runden Lauf‘ getroffen wurden, liegt der ‚Mangel‘ häufig darin, dass die Menschen, die mit der Lösung beauftragt sind, nicht miteinander auskommen. Oft ist diese menschliche Komponente der Grund dafür, dass ein Projekt entweder zum Erfolg geführt wird oder scheitert. Deshalb achten wir bei Volkswagen sehr genau auf eine konstruktive Kultur.“

### ... eine gewählte Strategie erfolgreich umzusetzen:

SCHLEGEL: „Eine klassische Aufgabe für einen Piloten: Er macht eine Steuereingabe und muss schnell erkennen, wie das System reagiert. Er darf dabei nicht zu lange nur auf eine Stelle schauen, sondern muss alles im Blick haben und gleich den nächsten Input geben. Und während er sich um die Feinsteuerung kümmert, muss er schon weiterdenken: Was zum Beispiel ist zu tun, falls am Zielflughafen schlechtes Wetter herrscht? Also muss er ständig kontrollieren, oder anders gesagt: ständig die Hand am Puls des Geschehens haben. Ich bewundere Manager, die das erfolgreich und fehlerlos können, weil ich weiß, wie leicht man Kleinigkeiten übersehen kann, die sich später als entscheidend erweisen.“

WINTERKORN: „Mit diesem Bild kann ich gut leben.“

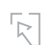

**WEITERE INFORMATIONEN**  
[www.volkswagenag.de](http://www.volkswagenag.de)

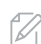

**AUTOR**  
 Dirk Maxeiner



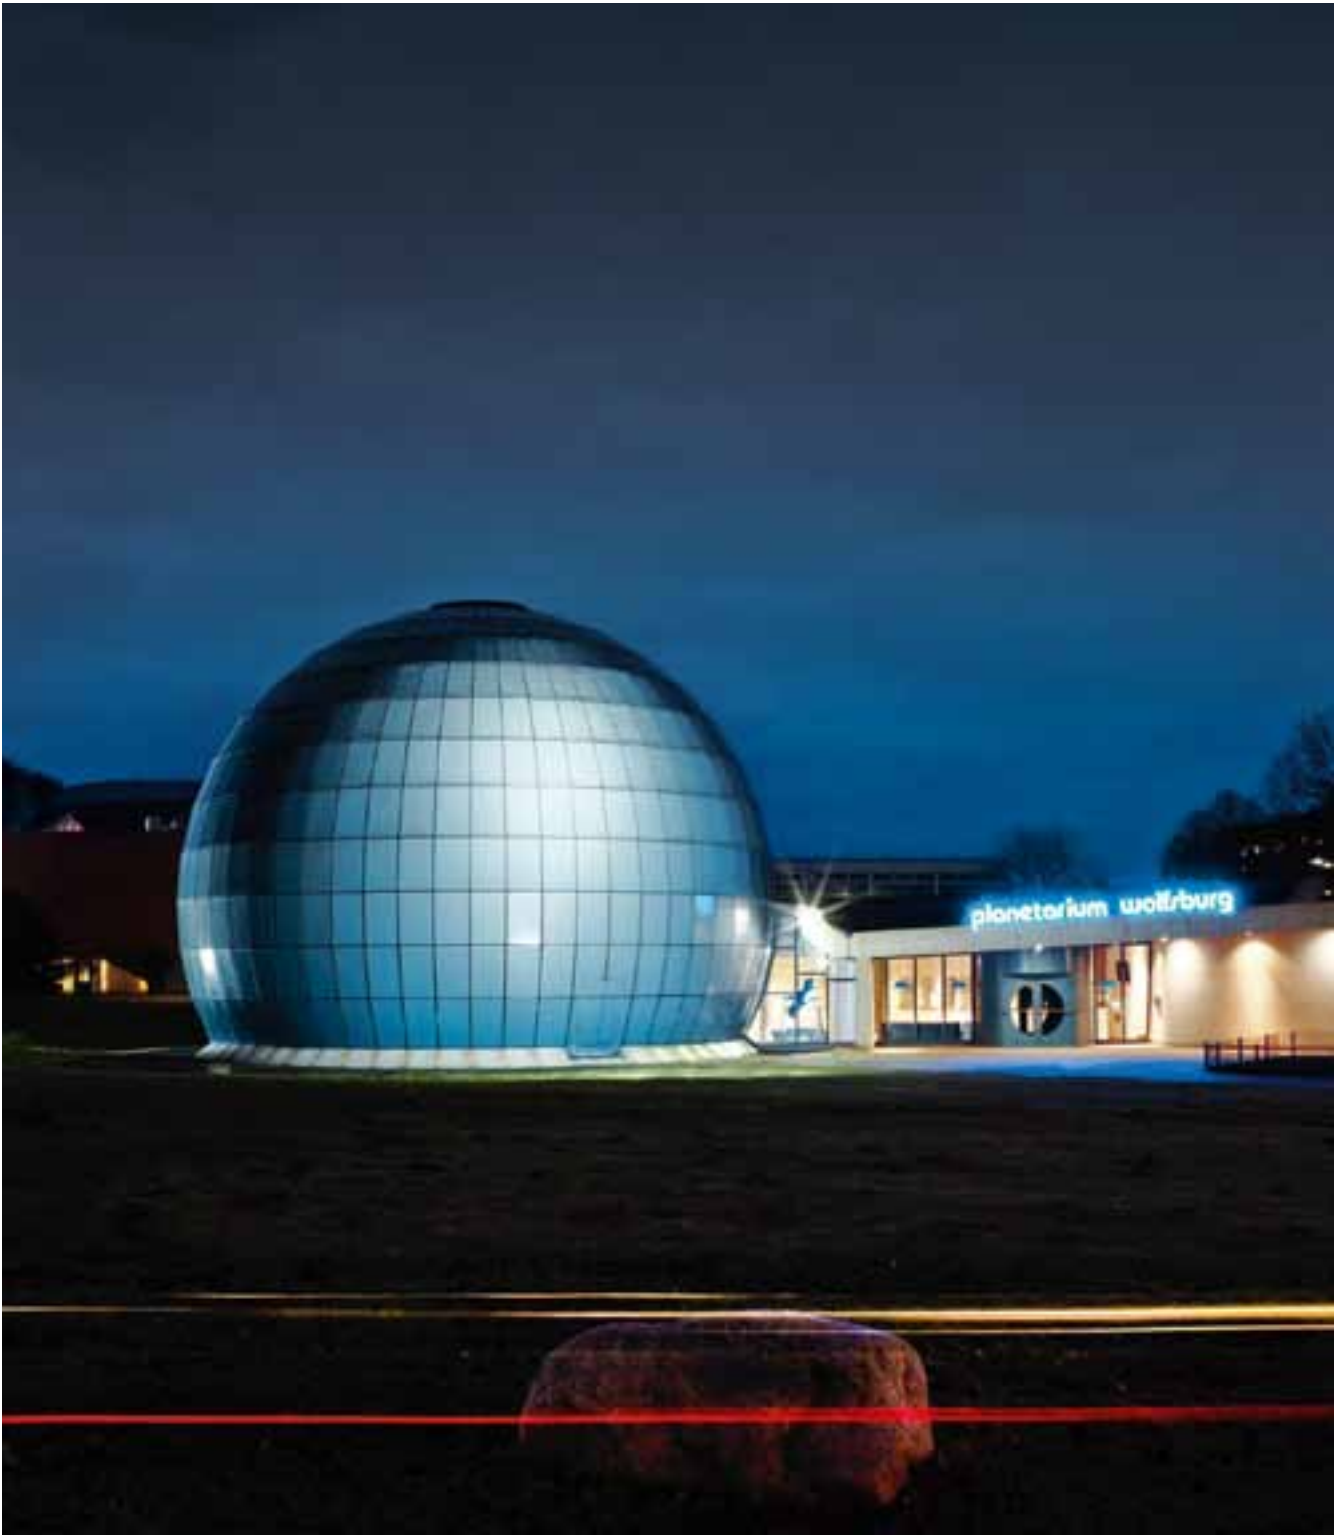

**DEN STERNEN GANZ NAH** – Das Planetarium in Wolfsburg zählt zu den zehn größten Anlagen seiner Art in Deutschland. Der Projektor wirft über 9.000 Sterne an den Kuppel-Himmel und lässt Sonne, Mond und Planeten kreisen.



# Katapult in die Moderne.



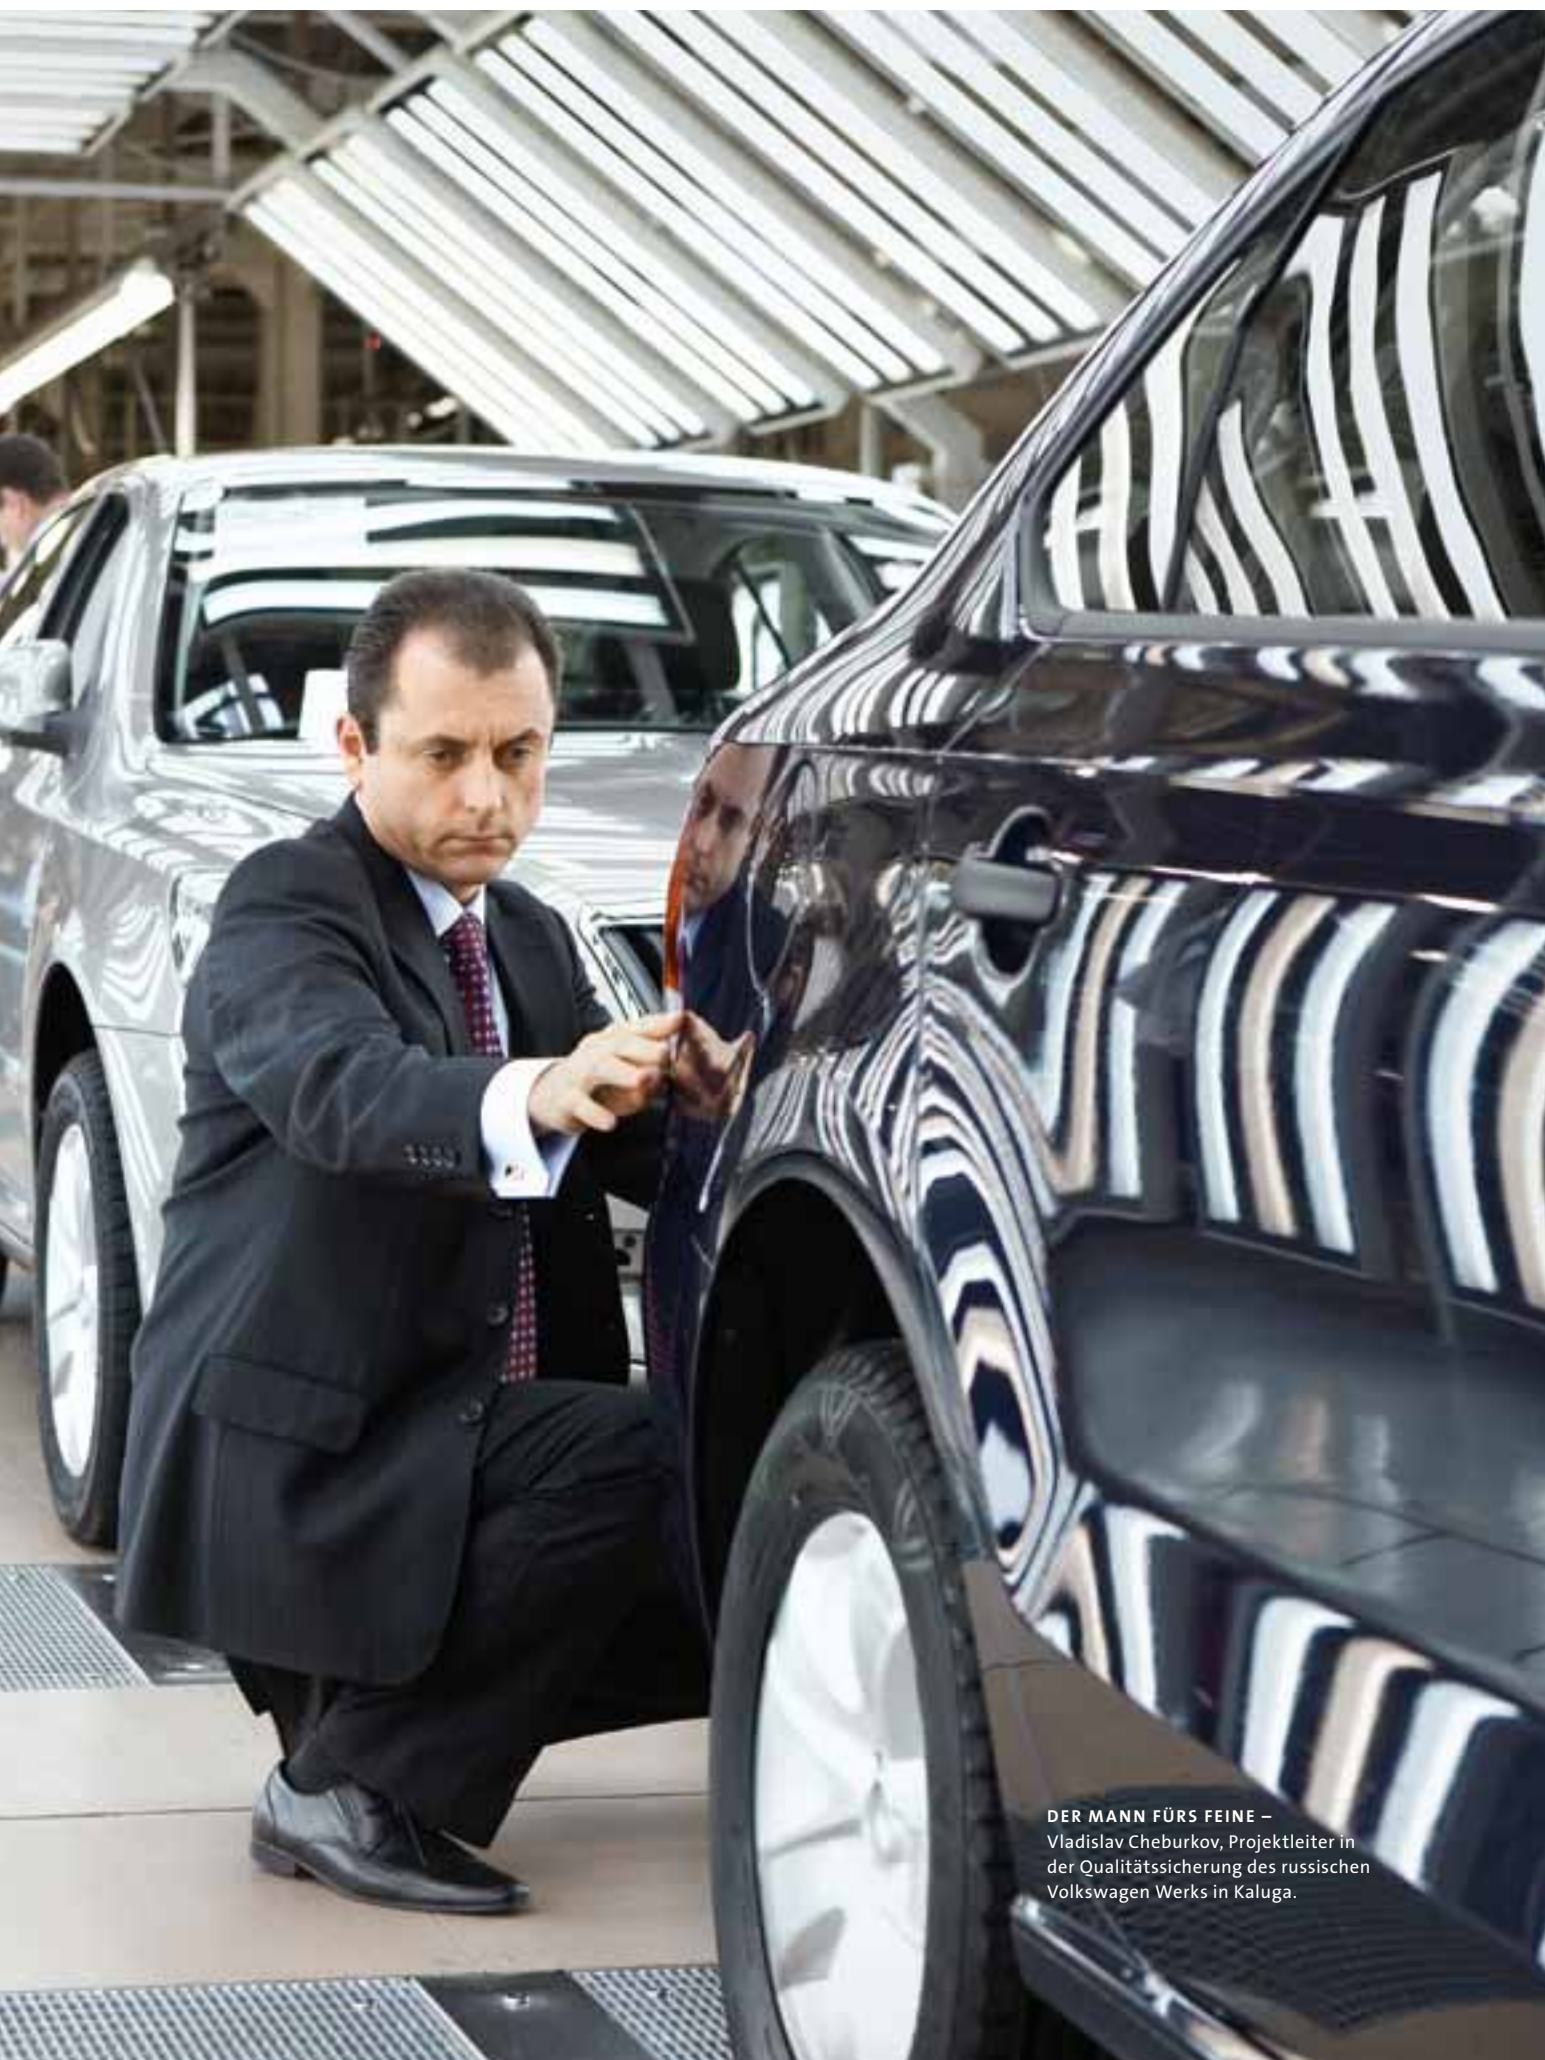

**DER MANN FÜRS FEINE –**  
Vladislav Cheburkov, Projektleiter in  
der Qualitätssicherung des russischen  
Volkswagen Werks in Kaluga.

**Der russische Automarkt boomt. Mit vollständig in Russland produzierten Fahrzeugen ist Volkswagen auf Wachstumskurs. Vladislav Cheburkov, Projektleiter in der Qualitätssicherung, führt uns durch das 2007 eröffnete Volkswagen Werk in Kaluga. Sein Auftrag lautet: kompromisslose Qualität.**

Die russische Provinzhauptstadt Kaluga liegt 160 Kilometer südwestlich von Moskau am Fluss Oka und hat etwa 350.000 Einwohner. Bei der Stadtrundfahrt gibt die Dolmetscherin Besuchern aus dem Ausland einen politisch-architektonischen Schnellkurs. Der monumentale Theaterplatz sei „Ära Stalin“. Die schnell gezimmerten Plattenbauten: „Chruschtschow“. Die freitragende Markthalle: „Breschnew“. Die dort inzwischen dargebotene Warenvielfalt: „Putin“. Das wirtschaftliche Zusammenwachsen der Weltmärkte markiert den Beginn eines neuen, von Globalisierung geprägten Zeitabschnitts: „Volkswagen“.

Im November 2007 hat Volkswagen die Automobilfabrik vor den Toren der Stadt zunächst als Montagewerk für Fahrzeugbausätze eröffnet. Heute produzieren 4.200 Beschäftigte in Vollfertigung bis zu 150.000 Fahrzeuge pro Jahr. „Volkswagen“ markiert für Kaluga ein junges Zeitalter, das der stellvertretende Provinzgouverneur Maxim Akimov in eine schlichte Zahl kleidet: „Unsere Arbeitslosenquote liegt aktuell bei gerade mal 1,1 Prozent.“

#### **LEUCHTTURMPROJEKT „VOLKSWAGEN“**

Die einstigen Schlaglochkisten sind frisch geteert, Restaurants und Bars bedienen mit einem breiten Angebot von italienischen Spezialitäten bis japanischem Sushi sämtliche Geschmäcker. Dutzende Hotels sind entstanden, die neuen Supermärkte haben sieben Tage die Woche 24 Stunden lang geöffnet. „Volkswagen“, so sagt Akimov, „ist für uns ein Leuchtturmprojekt.“ Davon angezogen, haben sich inzwischen auch weitere ausländische Autobauer und Zulieferunternehmen hier angesiedelt: „Wir werden zu einem Automobil-Cluster.“

Russland tut viel dafür, seine Wertschöpfungskette auszubauen, denn der Löwenanteil des Bruttoinlandsprodukts stammt noch immer aus der Energie- und Rohstoffbranche. Deshalb möchte

die russische Gesellschaft einst stolze Industrien wie den Flugzeug-, Auto- und Schiffsbau wieder neu etablieren. Was gar nicht so einfach ist, weil das zu Zeiten der Sowjetunion geprägte Produktionsprinzip längst nicht mehr konkurrenzfähig ist.

„Bei den alten russischen Autoherstellern wurde nahezu alles unter einem Dach hergestellt, bis hin zum Scheibenwischergummi“, erläutert Dr. Walter Jürgen Schmid, bis zum Frühjahr 2010 deutscher Botschafter in Moskau. „Im modernen westlichen Automobilbau liegt die Fertigungstiefe vielleicht noch bei zehn oder 15 Prozent, alles andere kommt von externen Spezialisten.“ Schmid, der maßgeblich daran beteiligt war, den komplizierten bürokratischen Weg für deutsche Investitionen in Russland zu ebnen, erinnert sich lächelnd: „Ganz nebenbei bin ich so zum Produktionsexperten geworden.“

Dabei stehen die Ansprüche der russischen Automobilkäufer denen westeuropäischer Kunden in nichts nach: Qualität ist das A und O. Bislang dominierten Importautos den russischen Markt. Schließlich hatten die Russen in der Vergangenheit mit den im Lande produzierten Fahrzeugen keine besonders guten Erfahrungen gesammelt. Das soll sich ändern: „Unser Ziel ist es ‚Made by Volkswagen in Russia‘ zum Qualitätssiegel zu machen“, so formuliert es Marcus Osegowitsch, neuer Generaldirektor der Volkswagen Group Rus. Deshalb widmet sich in Russland auch eine ganze Armada erfahrener Spezialisten der Einhaltung der Volkswagen Qualitätsstandards, die überall auf der Welt gleich hoch sind. Eine anspruchsvolle Aufgabe, denn im Werk Kaluga laufen vier Modelle vom gleichen Band. Neben dem Fabia und dem Octavia der Marke Škoda sind das der Volkswagen Tiguan und der neue Polo Sedan.

Der speziell auf den russischen Markt zugeschnittene Polo Sedan wird seit Mitte 2010 in Kaluga gefertigt. Vladislav Cheburkov,



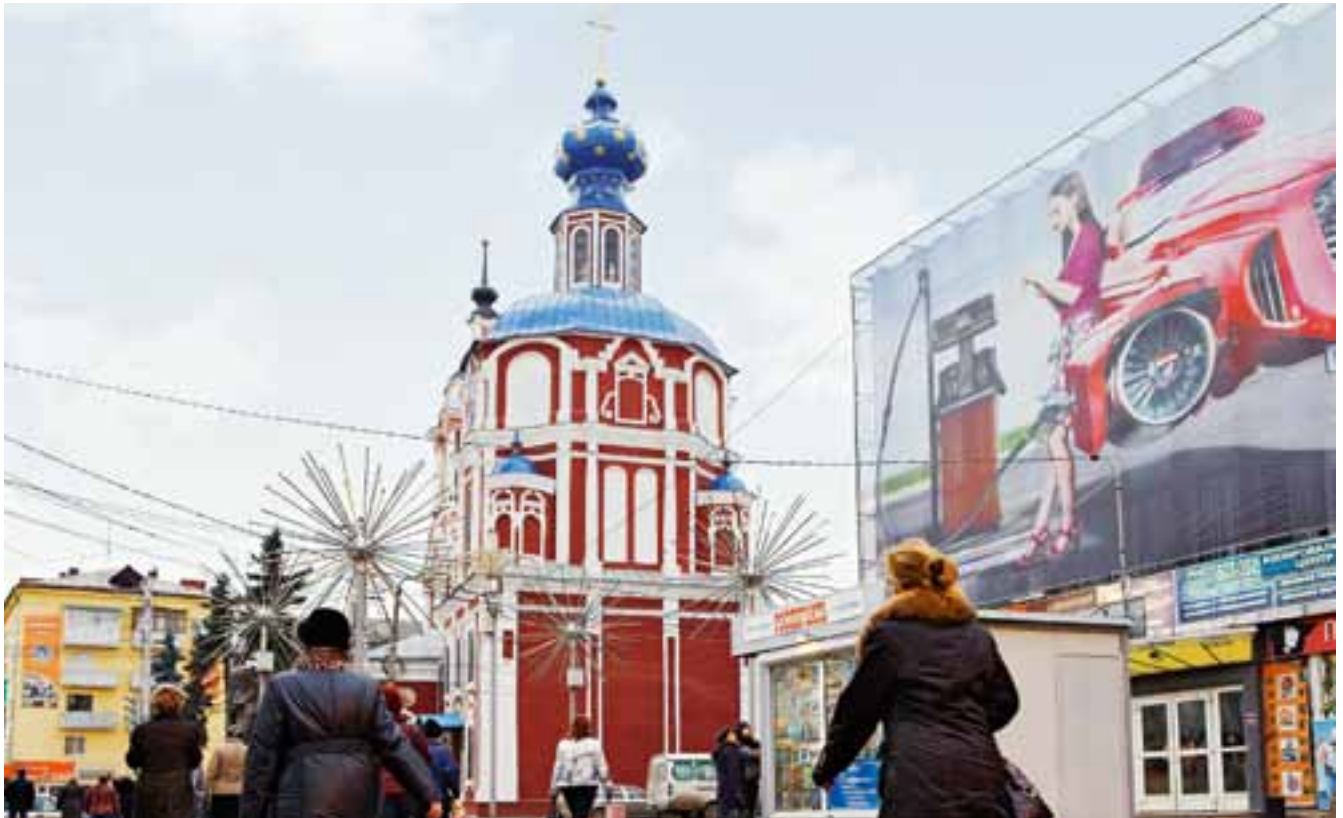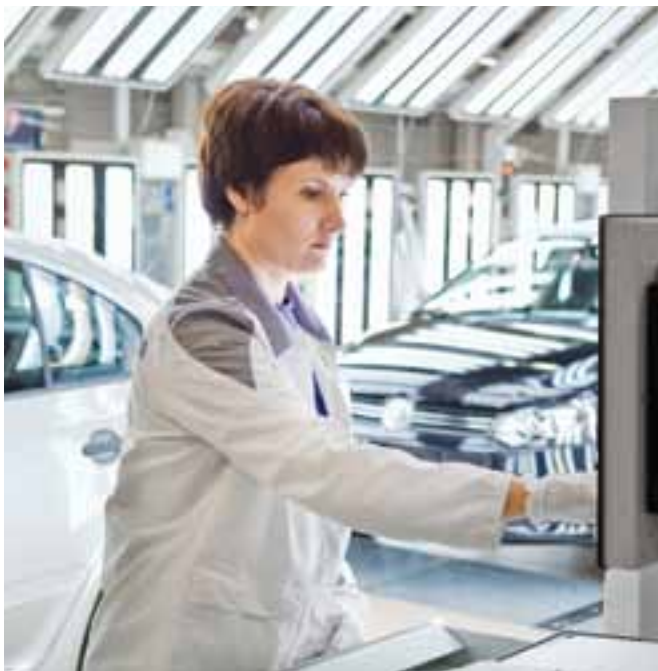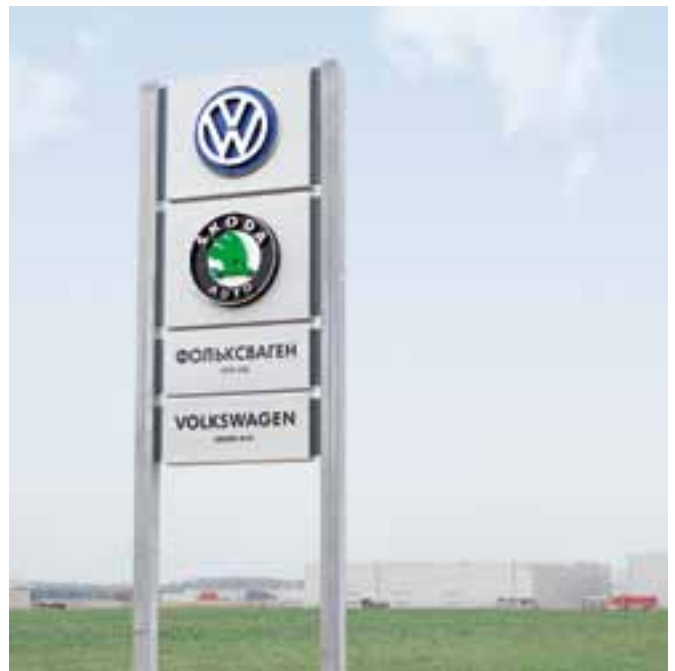

**DER MENSCH MACHT'S** – Neben modernen Kontroll- und Qualitätssicherungssystemen in der Fertigung (unten), spielt die Ausbildung der Mitarbeiter eine Schlüsselrolle. Volkswagen brachte sein in aller Welt erworbenes Ausbildungs-Know-how mit nach Russland.

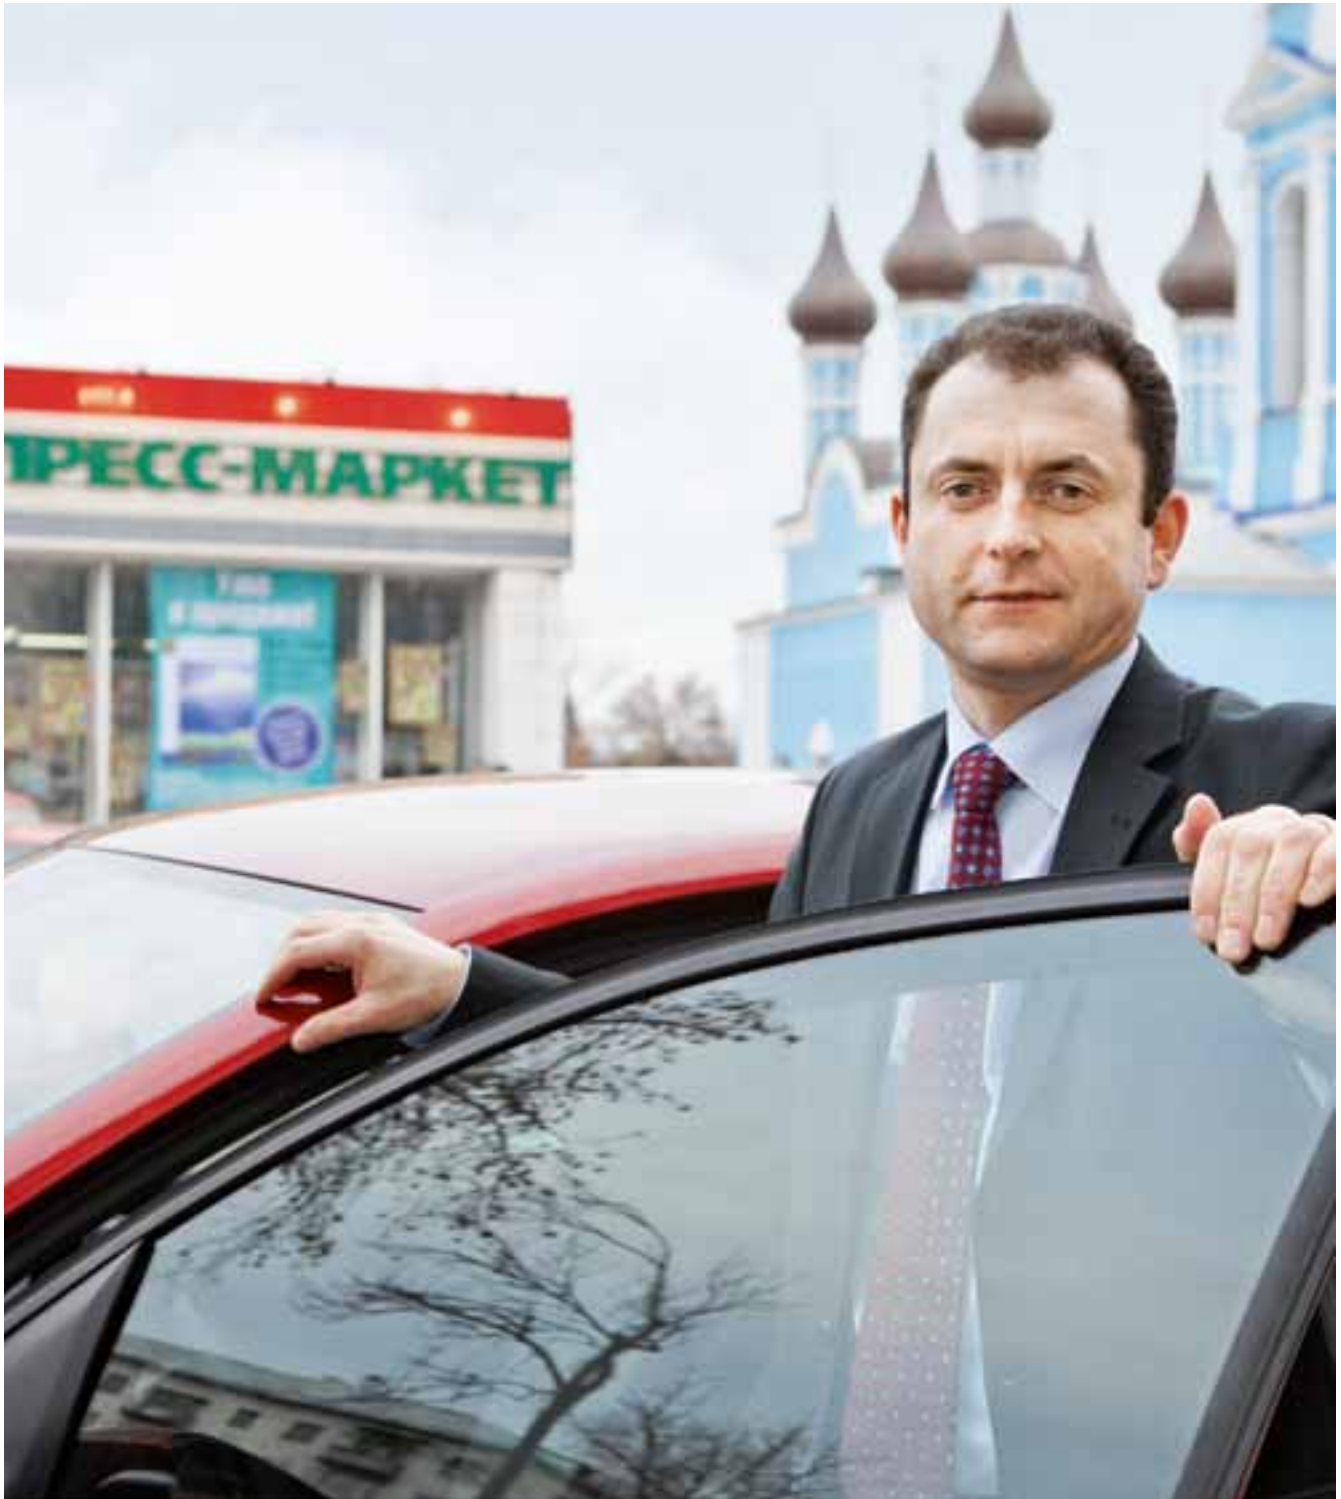

„Wir haben hier jetzt nicht nur neue Straßen  
und schöne Autos, sondern es entwickelt sich auch  
ein ganz neues Denken.“

VLADISLAV CHEBURKOV



# 4.200 Beschäftigte fertigen bei Volkswagen in Kaluga bis zu 150.000 Fahrzeuge pro Jahr.

Projektleiter im Bereich Qualitätssicherung, hat diesen Prozess besonders intensiv begleitet. Als die ersten Fahrzeuge ausgeliefert wurden, schwärmte er mit seinen Kollegen bis in Russlands entlegenste Winkel aus, um sofort reagieren zu können, falls beim Händler oder Kunden Probleme auftauchen sollten. So verbrachte er einige Wochen in Tscheljabinsk, einer Stadt am Ural etwa 2.000 Kilometer von Kaluga entfernt. „Wir haben jeden Morgen per Videoschaltung mit den Spezialisten im Werk konferiert“, erzählt Cheburkov in fließendem Deutsch.

## QUALITÄT „MADE IN RUSSIA“

Neben den in einer modernen, automatisierten Fertigung „eingebauten“ Kontrollen und „Qualitätsschleifen“ spielt in Kaluga wie an allen 63 Konzernstandorten die Ausbildung der Mitarbeiter eine Schlüsselrolle. Der Volkswagen Konzern brachte deshalb nicht nur Gebäude und Maschinen, sondern sein in aller Welt erworbenes Ausbildungs-Know-how mit nach Russland. „Schulen, schulen, schulen“, heißt die Maxime von Werksleiter Josef Baumert: „Bei uns kommt kein Mitarbeiter ohne intensive Ausbildung an seinen Arbeitsplatz.“ Die Ansprüche sind hoch: Jeder Bewerber muss sich in einer halbjährigen Probe- und Schulungsphase bewähren, bevor er einen Anstellungsvertrag erhält. In einer Kooperation mit dem staatlichen „Berufslizeum Nummer 18“ unterhält Volkswagen in Kaluga zusätzlich ein Ausbildungszentrum für den Nachwuchs.

Die hohen Ansprüche, die Volkswagen an die Qualifikation der eigenen Mitarbeiter stellt, gelten auch für Zulieferer. In gründlichen Audits wird nicht nur deren Produktqualität

beurteilt, sondern auch diskutiert, wie der Betrieb diese Qualität auf Dauer sicherstellen kann. „Was hilft beispielsweise die modernste Maschine, wenn es keinen Wartungsplan gibt“, erläutert Baumert. Bislang haben in Russland 31 Unternehmen die anspruchsvolle Volkswagen Lieferantenprüfung bestanden, darunter fünf rein russische Betriebe. Der Rest sind russisch-westliche Joint Ventures oder Töchter internationaler Hersteller.

Jeden Morgen um 9.30 Uhr schlägt in einem Konferenzraum in Kaluga die Stunde der Wahrheit: Dann beraten Techniker und Produktionsspezialisten per Videokonferenz Qualitätsfragen und eventuelle Probleme, die speziell den russischen Markt betreffen. Ab und zu fliegen auch Kollegen aus der Qualitätssicherung in Wolfsburg ein. Dann wird schon mal ein beliebiges Fahrzeug aus dem neben dem Werk gelegenen „nationalen Verteilungszentrum“ – mit Platz für bis zu 10.000 Autos – ausgewählt und auf Herz und Nieren geprüft. Vladislav Cheburkov hat diese Volkswagen Qualitätskultur längst verinnerlicht. Und er glaubt, dass sie für die Stadt Kaluga eine weit über das Auto hinausgehende Bedeutung hat: „Wir haben hier jetzt nicht nur neue Straßen und schöne Autos, sondern es entwickelt sich auch ein ganz neues Denken“, lobt er: Fortschritt in der ‚Ära Volkswagen‘ – das haben hier schon viele Menschen verstanden – bedeutet, dass jeder etwas erreichen kann, der sich anstrengt.“

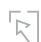

## WEITERE INFORMATIONEN

[www.volkswagenag.de](http://www.volkswagenag.de) > Produktionsstandorte > Europa > Kaluga

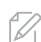

## AUTOR

Dirk Maxeiner

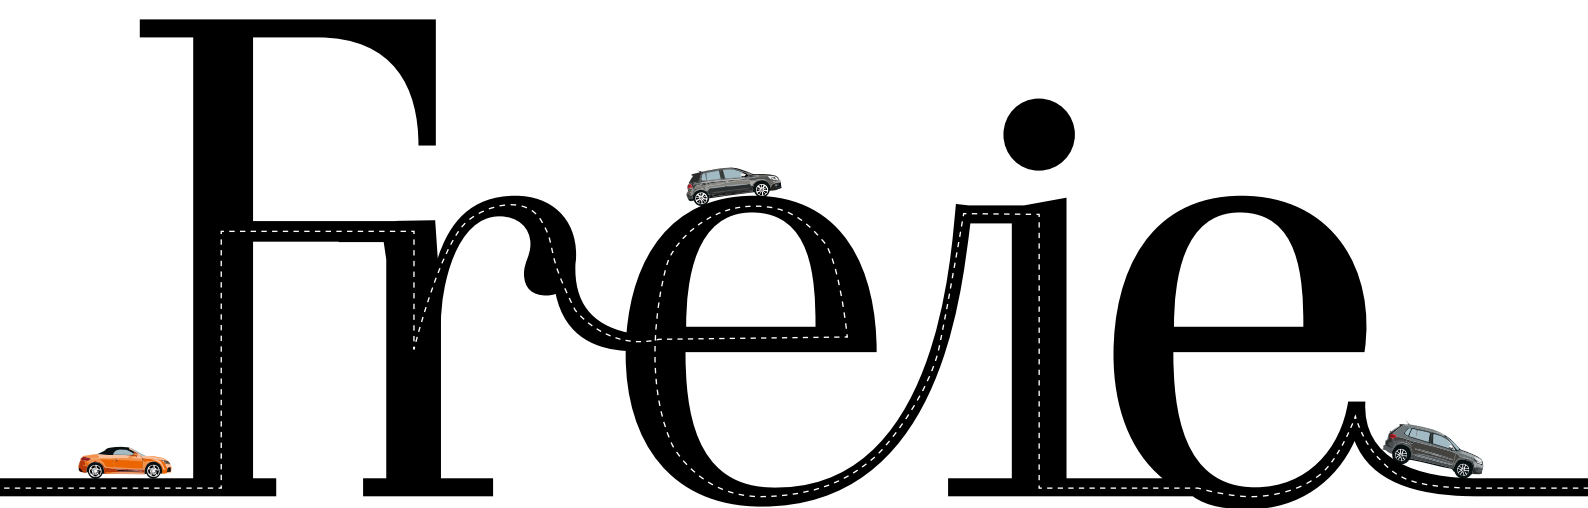



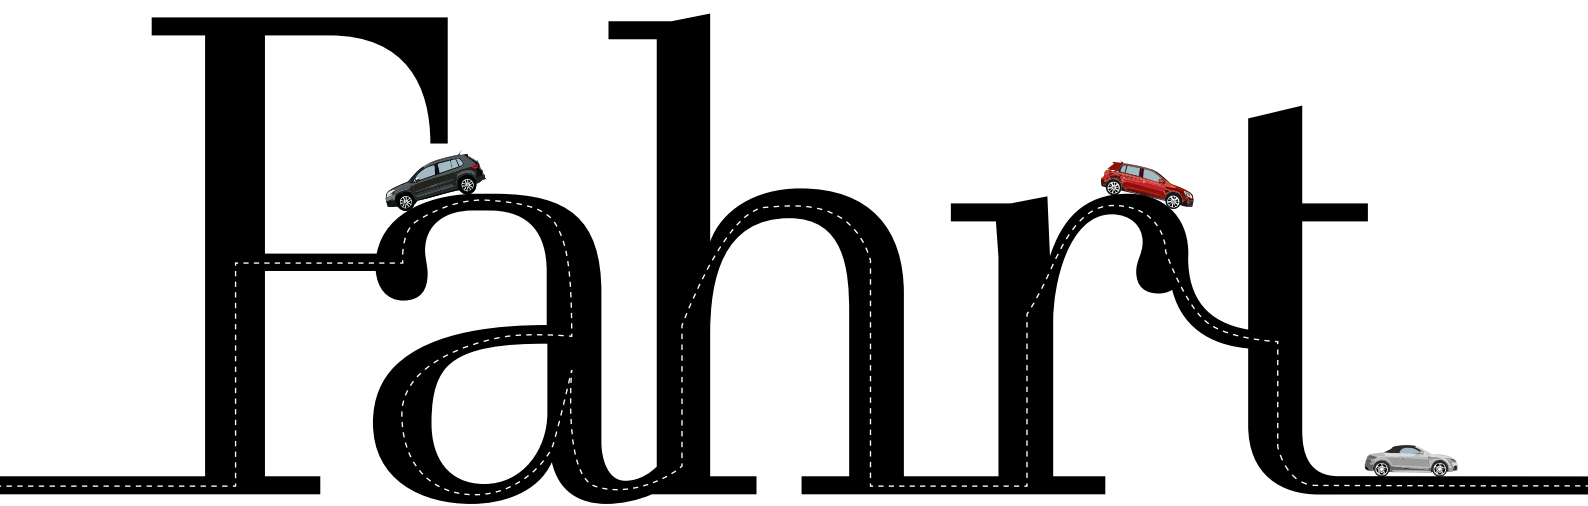

Einfach einsteigen und entspannt die Fahrt genießen, während das Auto selbstständig lenkt, bremst und Gas gibt. Vision einer fernen Zukunft? In der Forschung des Volkswagen Konzerns hat diese Zukunft bereits begonnen.

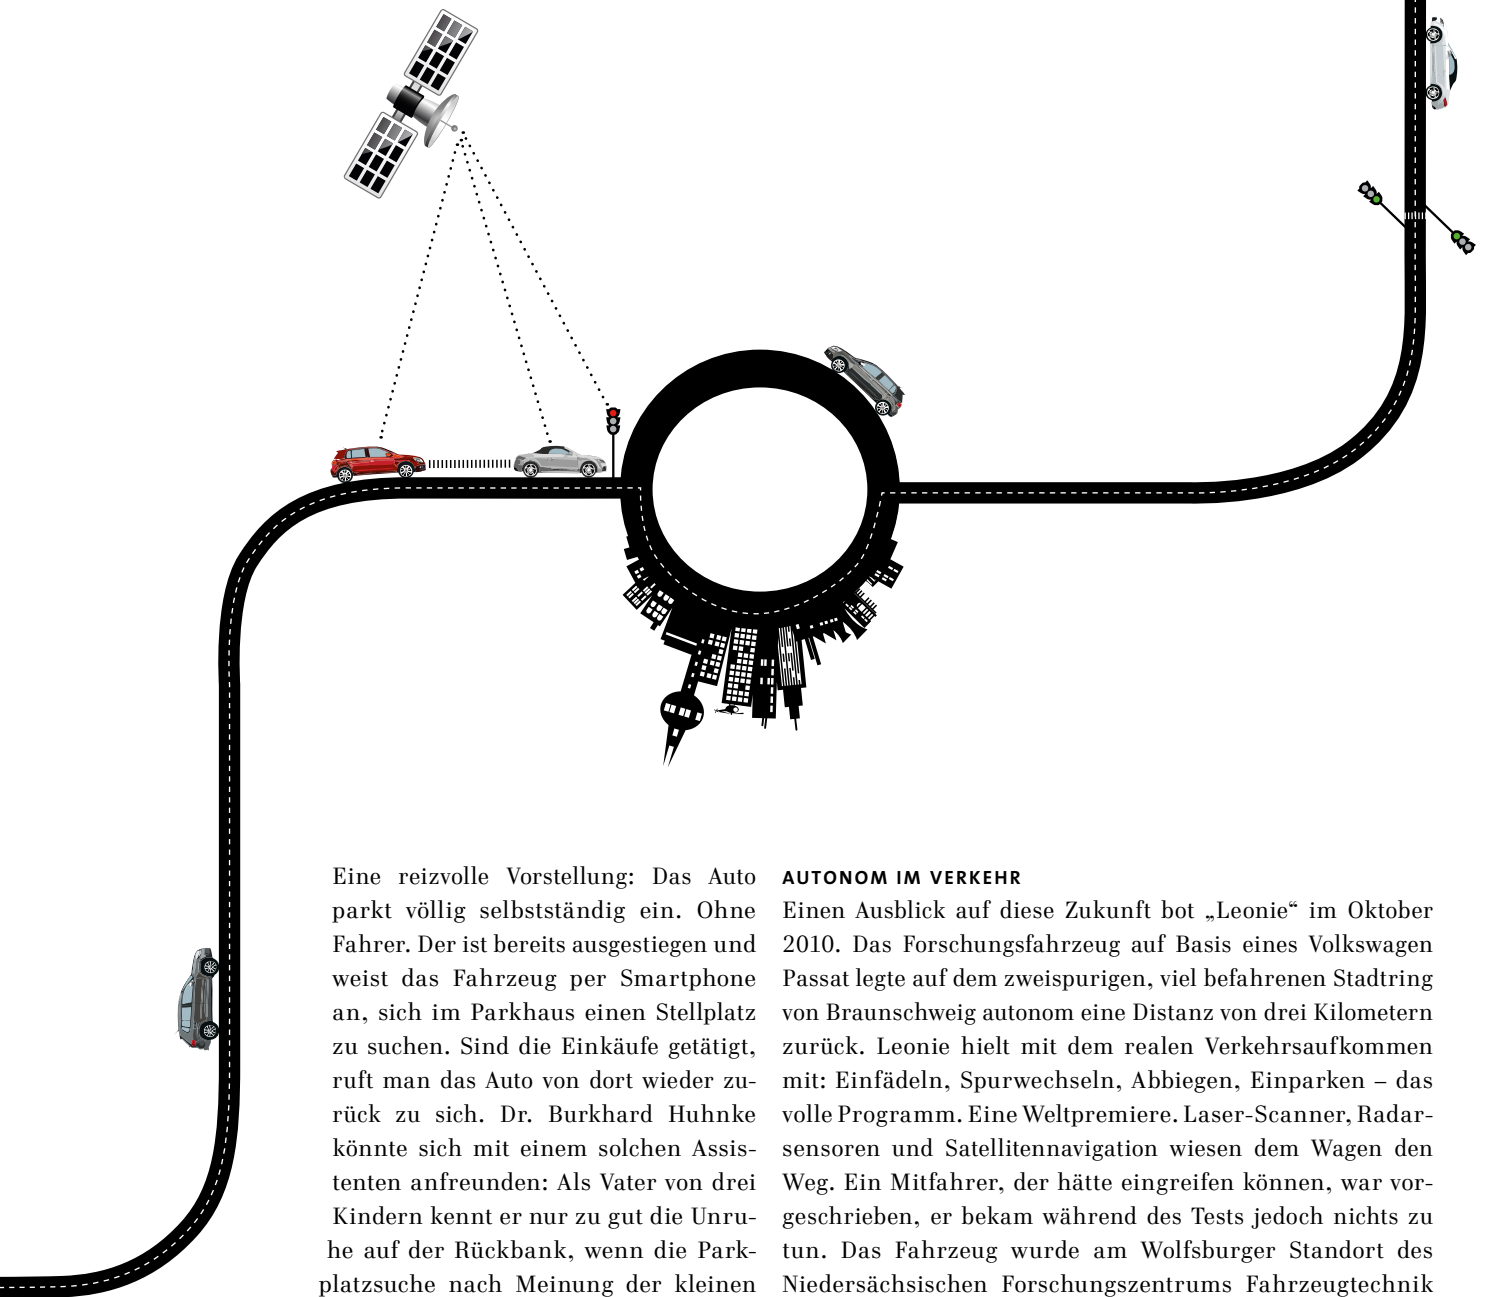

Eine reizvolle Vorstellung: Das Auto parkt völlig selbstständig ein. Ohne Fahrer. Der ist bereits ausgestiegen und weist das Fahrzeug per Smartphone an, sich im Parkhaus einen Stellplatz zu suchen. Sind die Einkäufe getätigt, ruft man das Auto von dort wieder zurück zu sich. Dr. Burkhard Huhnke könnte sich mit einem solchen Assistenten anfreunden: Als Vater von drei Kindern kennt er nur zu gut die Unruhe auf der Rückbank, wenn die Parkplatzsuche nach Meinung der kleinen Passagiere wieder einmal zu lange dauert. Der 43-jährige Ingenieur leitet das Electronics Research Lab (ERL) der Volkswagen Konzernforschung im kalifornischen Silicon Valley. Eines der großen Themen, mit denen sich das Forschungslabor beschäftigt, ist das autonome Fahrzeug, also Autofahren ohne Fahrer.

„Noch in diesem Jahrzehnt“, so Huhnke, „könnte ein automatischer Parkassistent, der das Auto sicher durch ein Parkhaus bewegt, serienreif entwickelt werden.“ Auch einen automatischen Autobahn-Piloten hält er für denkbar. Der Fahrer könnte während der Überlandfahrt lesen, arbeiten oder sich mit dem Nachwuchs im Fond beschäftigen – das Auto übernimmt das Steuer. „Es ist technisch machbar, jedoch noch nicht serienreif“, erklärt Huhnke. Auch der Gesetzgeber steht bisher auf dem Bremspedal. Die Straßenverkehrsordnungen in den USA wie auch in Europa schreiben vor: Hände ans Lenkrad! Spezialisten der Automobilindustrie, Verkehrsexperten und Juristen sitzen aber schon an einem Tisch, um die Rahmenbedingungen für das Autofahren von morgen zu schaffen.

#### AUTONOM IM VERKEHR

Einen Ausblick auf diese Zukunft bot „Leonie“ im Oktober 2010. Das Forschungsfahrzeug auf Basis eines Volkswagen Passat legte auf dem zweispurigen, viel befahrenen Stadtring von Braunschweig autonom eine Distanz von drei Kilometern zurück. Leonie hielt mit dem realen Verkehrsaufkommen mit: Einfädeln, Spurwechseln, Abbiegen, Einparken – das volle Programm. Eine Weltpremiere. Laser-Scanner, Radarsensoren und Satellitennavigation wiesen dem Wagen den Weg. Ein Mitfahrer, der hätte eingreifen können, war vorgeschrieben, er bekam während des Tests jedoch nichts zu tun. Das Fahrzeug wurde am Wolfsburger Standort des Niedersächsischen Forschungszentrums Fahrzeugtechnik (NFF) entwickelt. Als Innovationspartner stehen dem NFF die Technische Universität Braunschweig und die Volkswagen Konzernforschung zur Seite.

Grenzen ausloten, Höchstleistung einfordern – das stand bei einem ganz anders gelagerten Experiment im Vordergrund, das ERL-Direktor Huhnke und sein Team in den USA in Angriff nahmen. 18. September 2010, US-Bundesstaat Colorado: Ein Audi TTS startet seine fahrerlose Fahrt hinauf auf den 4.300 Meter hohen Pikes Peak in den Rocky Mountains. 156 Kurven auf mehr als 20 Kilometern, ein Teil davon unbefestigte Serpentinenspiste. Leitplanken? Keine. Ein Jahr Vorarbeit steckt in diesem Projekt. Huhnke ist angespannt. Der 197 kW (265 PS) starke Audi gibt ordentlich Gas, driftet um die Kurven. Als „Steuermann“ arbeitet eine sehr präzise GPS-Navigation, die schon zwei Zentimeter Abweichung von der Ideallinie erkennt. Ginge etwas schief, das Auto würde es kaum heil überstehen. Doch der Audi bleibt in der Spur, meistert alle Unebenheiten, wirbelt gehörig Staub von den Schotterstrecken auf und erreicht den Gipfel. Vier Mal bewältigt das Audi Coupé die Strecke – ohne Störung. Der „Autonome Audi TTS“ ist



## „Wir geben dem Fahrer mit cleveren Assistenzsystemen einen kleinen Schutzengel mit ins Auto.“

DR. ARNE BARTELS, PROJEKTLLEITER AUTOMATISCHES FAHREN

ein Projekt des Volkswagen Group Automotive Innovation Laboratory (VAIL) unter der Leitung des ERL und der Stanford University, die ebenfalls im Silicon Valley beheimatet ist.

„Wir haben etwas gewagt, das es in dieser Form noch nie gab: eine autonome Fahrt unter Extrembedingungen“, so Huhnke stolz. „Dabei ging es uns nicht um die Geschwindigkeit, sondern vor allem um die Robustheit der Software.“ Einen Systemabsturz darf es beim autonomen Fahren nicht geben. Die bei diesem Projekt entwickelte neue Software-Plattform hat sich bewährt. „Wir werden sie künftig in verschiedenen Fahrzeugtypen einsetzen, sie weiter intensiv testen und verfeinern“, beschreibt Huhnke die nächsten Schritte.

### GPS FÜR DEN WEITBLICK

Die Nutzung von GPS-Daten sieht er in der nahen Zukunft als gute Möglichkeit, das Autofahren noch sicherer zu machen. Denn mit diesen Informationen kann der Fahrer zum Beispiel vor engen Kurven gewarnt werden. Ist er zu schnell unterwegs und absehbar, dass das Auto die Kurve nicht mehr bewältigt, könnte es selbstständig abbremsen. Eines ist Huhnke in der Diskussion um das autonome Fahren wichtig: „Unsere Motivation ist nicht, Roboterautos das Fahren beizubringen. Wir wollen mit unseren Entwicklungen das Autofahren für die Menschen im Fahrzeug sicherer und komfortabler machen.“ Jährlich 37.000 Verkehrstote allein in den USA sind Grund genug, Fahrern zu helfen, besser zu reagieren und Unfälle zu vermeiden.

### AUTOPILOT ALS SPUR-WÄCHTER

Autonomes Fahren ist noch ein Experiment, Zukunftsmusik, doch die Noten dafür werden gerade geschrieben. Nicht nur im fernen Kalifornien, sondern auch in der Volkswagen Konzernforschung in Wolfsburg. Fahrerassistenzsysteme und deren

intelligentes Zusammenspiel sind dort das Aufgabengebiet von Dr. Arne Bartels. Sein jüngstes Projekt heißt „Temporary Auto Pilot“, kurz „TAP“. Das System ist eine Weiterentwicklung der automatischen Distanzregelung Adaptive Cruise Control, die bereits in vielen Modellen des Volkswagen Konzerns in Serie gegangen ist. Es kontrolliert nicht nur das Tempo und den Abstand zum vorausfahrenden Fahrzeug, sondern hält das Auto auch in der Spur. Angedacht ist es zunächst nur für den Einsatz auf Autobahnen. TAP orientiert sich über Laserscanner und Kamera an Fahrbahnmarkierungen, Leitplanken, GPS-Daten und anderen Verkehrsteilnehmern. Generell gilt: Stößt das System an seine Grenzen, wird der Fahrer sofort aufgefordert, das Steuer wieder selbst in die Hand zu nehmen. Noch ist TAP Teil des europäischen HAVEit-Programms, das intelligente automatische Verkehrssysteme erforscht. Es habe jedoch, so Bartels, „das Potenzial, ein konkretes Produkt zu werden – noch in den nächsten zehn Jahren“.

Bartels arbeitet eng mit seinen Kollegen im ERL zusammen. Er ist sich mit Huhnke einig: „All diese Technologien sollen auf keinen Fall den Spaß am Autofahren nehmen. Was wir wollen, ist, den Fahrer zu entlasten: In schwierigen, gefährlichen Situationen, aber ebenso im Stau oder während monotoner Autobahnfahrten“, erläutert Bartels. Denn geht es nur im Schrittempo vorwärts, steigt die Unaufmerksamkeit, der Fahrer widmet sich anderen Dingen. Gleiches gilt für lange Autobahnstrecken. Bartels: „Mit cleveren Assistenzsystemen geben wir ihm einen kleinen Schutzengel mit ins Auto.“

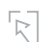

### WEITERE INFORMATIONEN

[www.volkswagenag.de](http://www.volkswagenag.de) > Innovation > Forschungsfahrzeuge

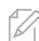

### AUTORIN

Tina Rumpelt

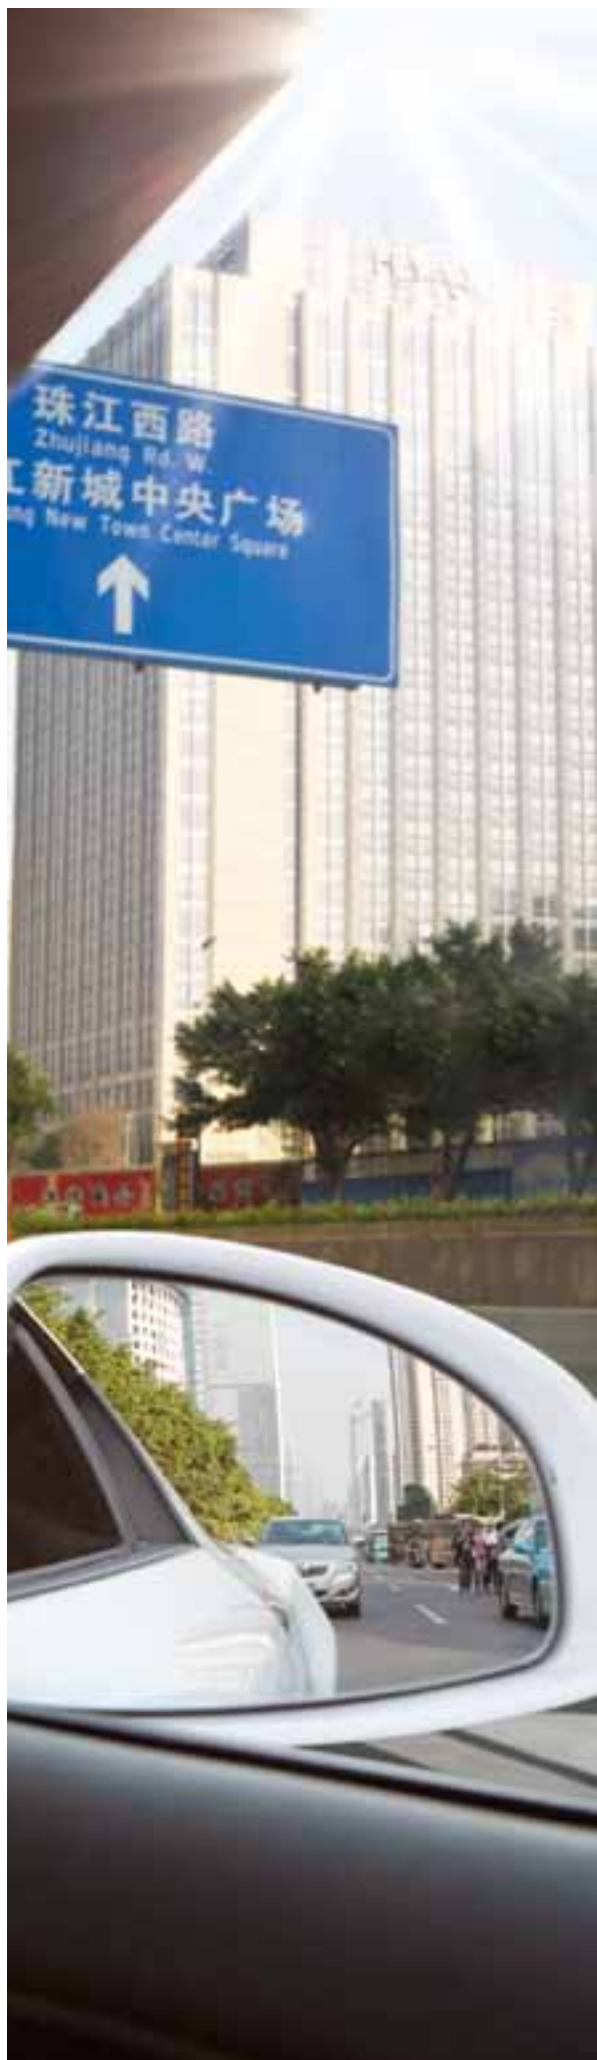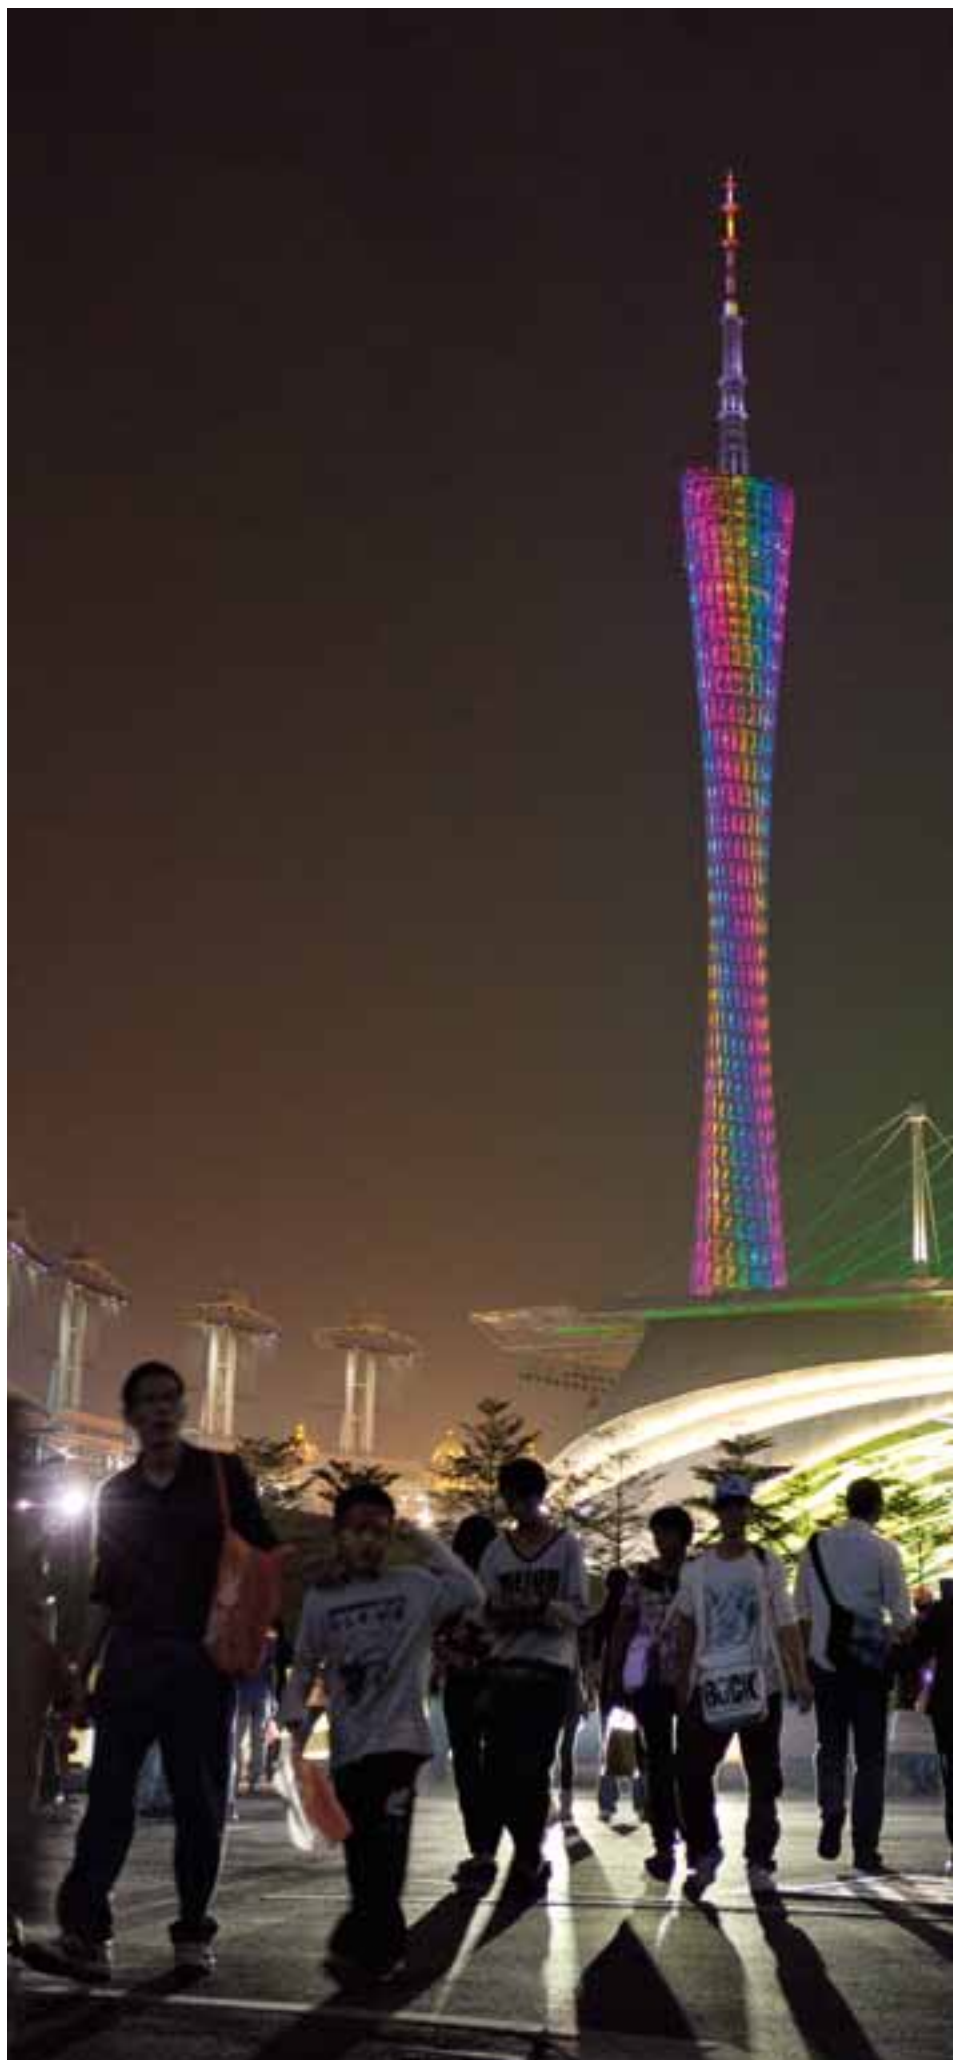



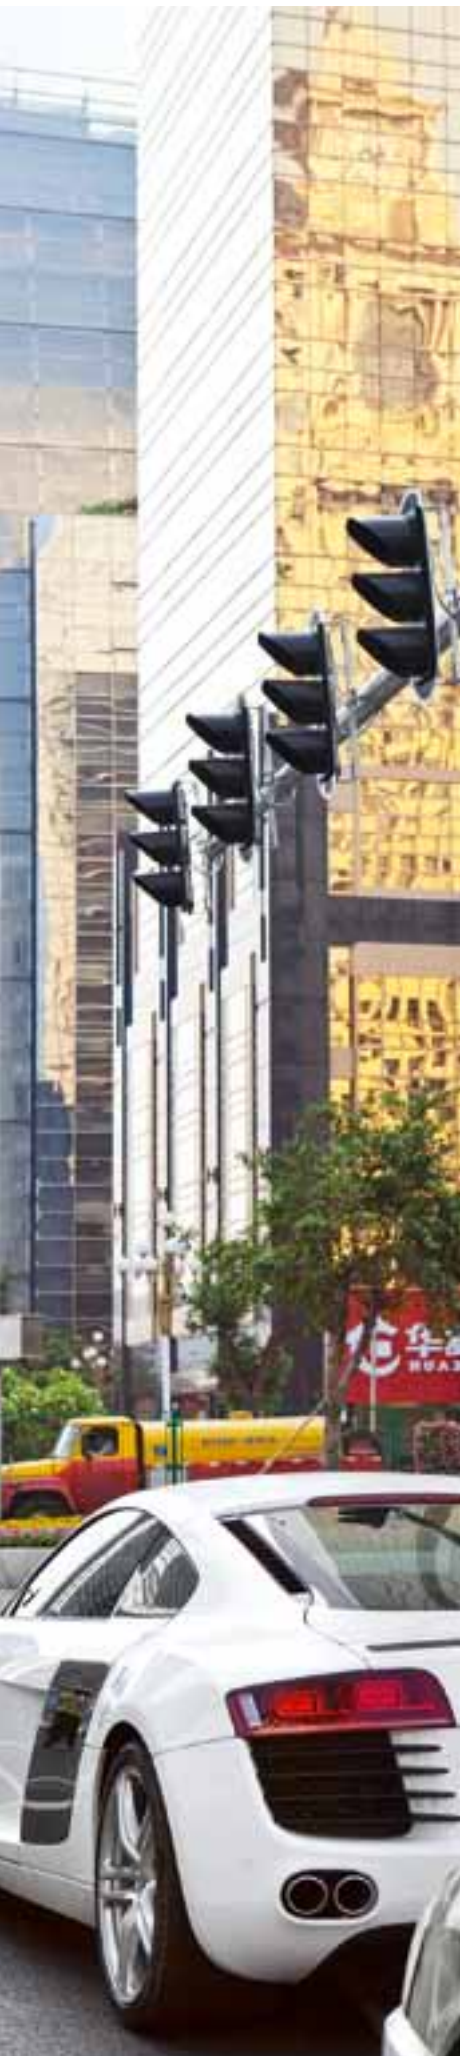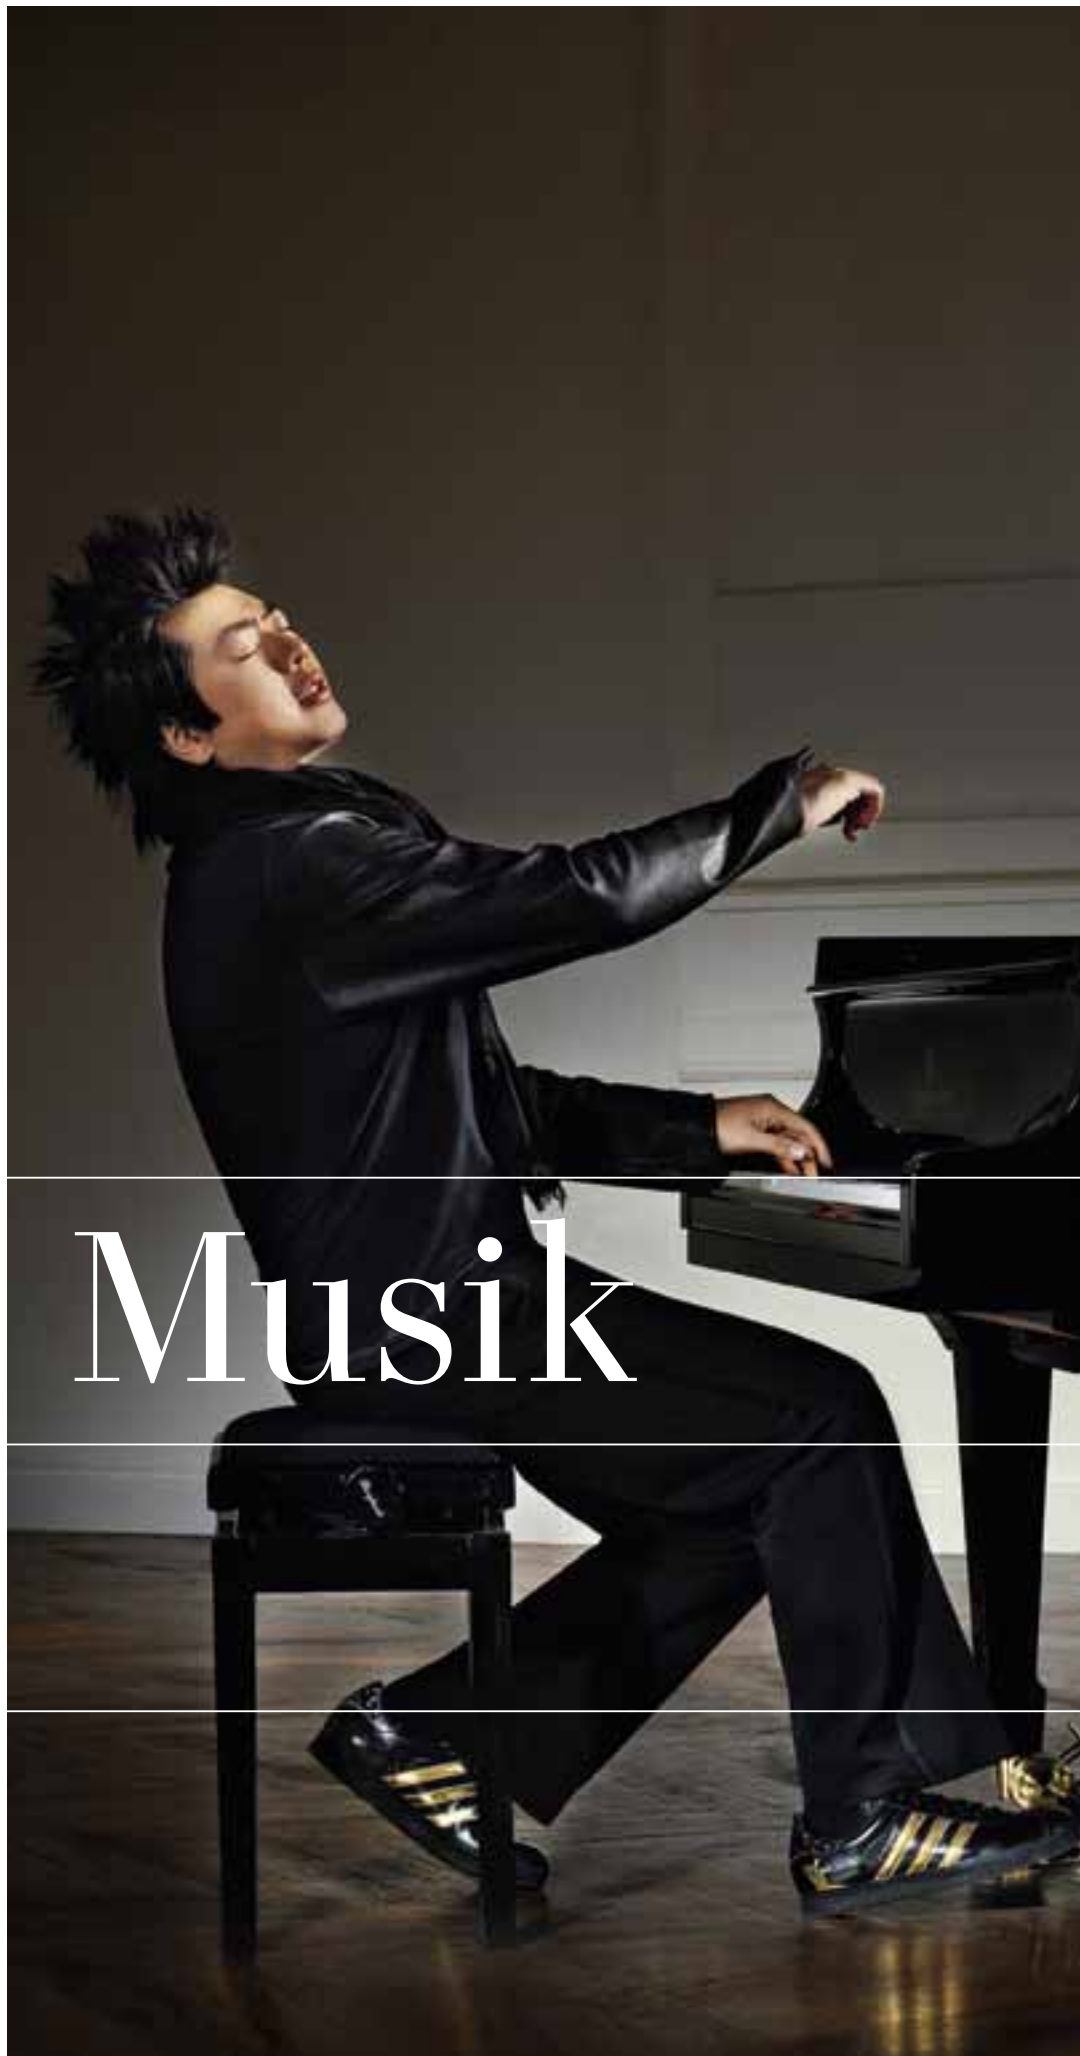

# Musik

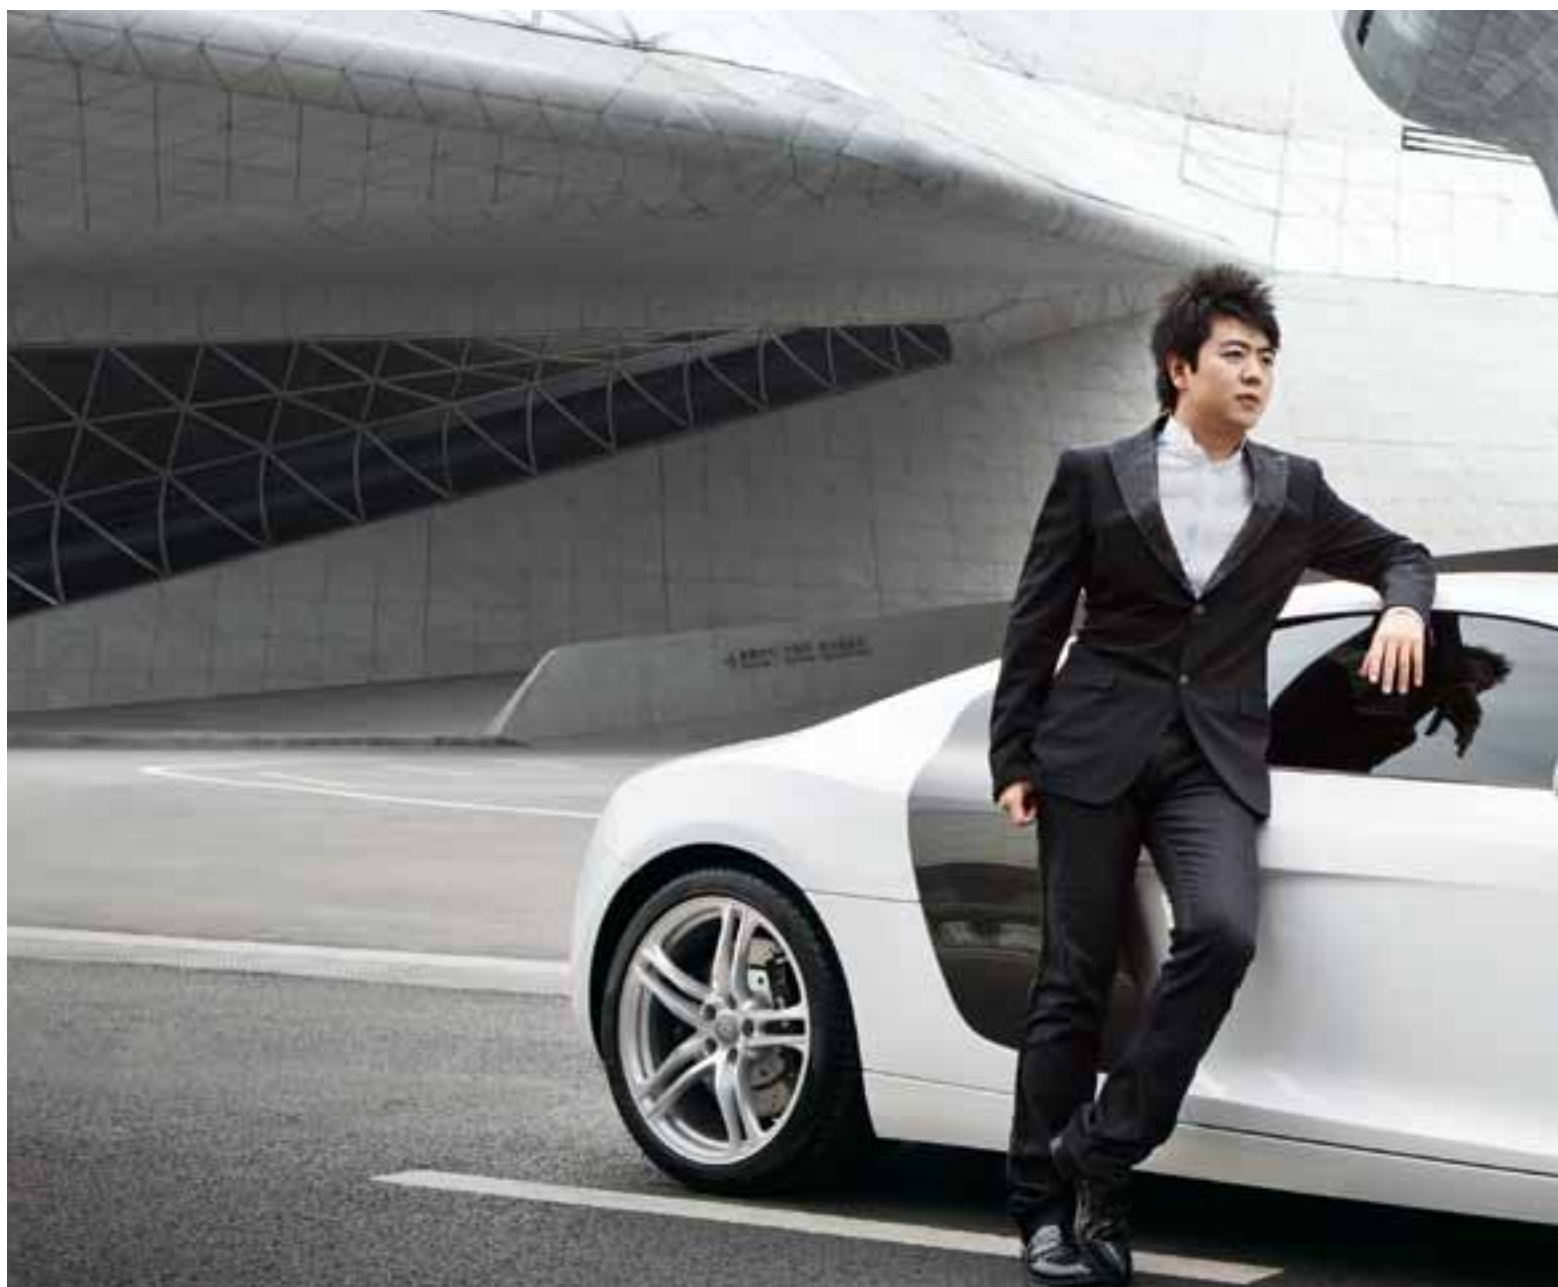

---

# der Metropole.

---

Als Kind konnte er sich kaum vorstellen, jemals in einem Auto zu fahren. Heute ist Lang Lang ein Virtuose am Klavier – und teilt am Steuer die Leidenschaft seiner chinesischen Landsleute: „Wir lieben Autos.“ Die Pferdestärken im Audi R8 hat er im Griff – und genießt die Fahrt durch die südchinesische Boom-Metropole Guangzhou.

---



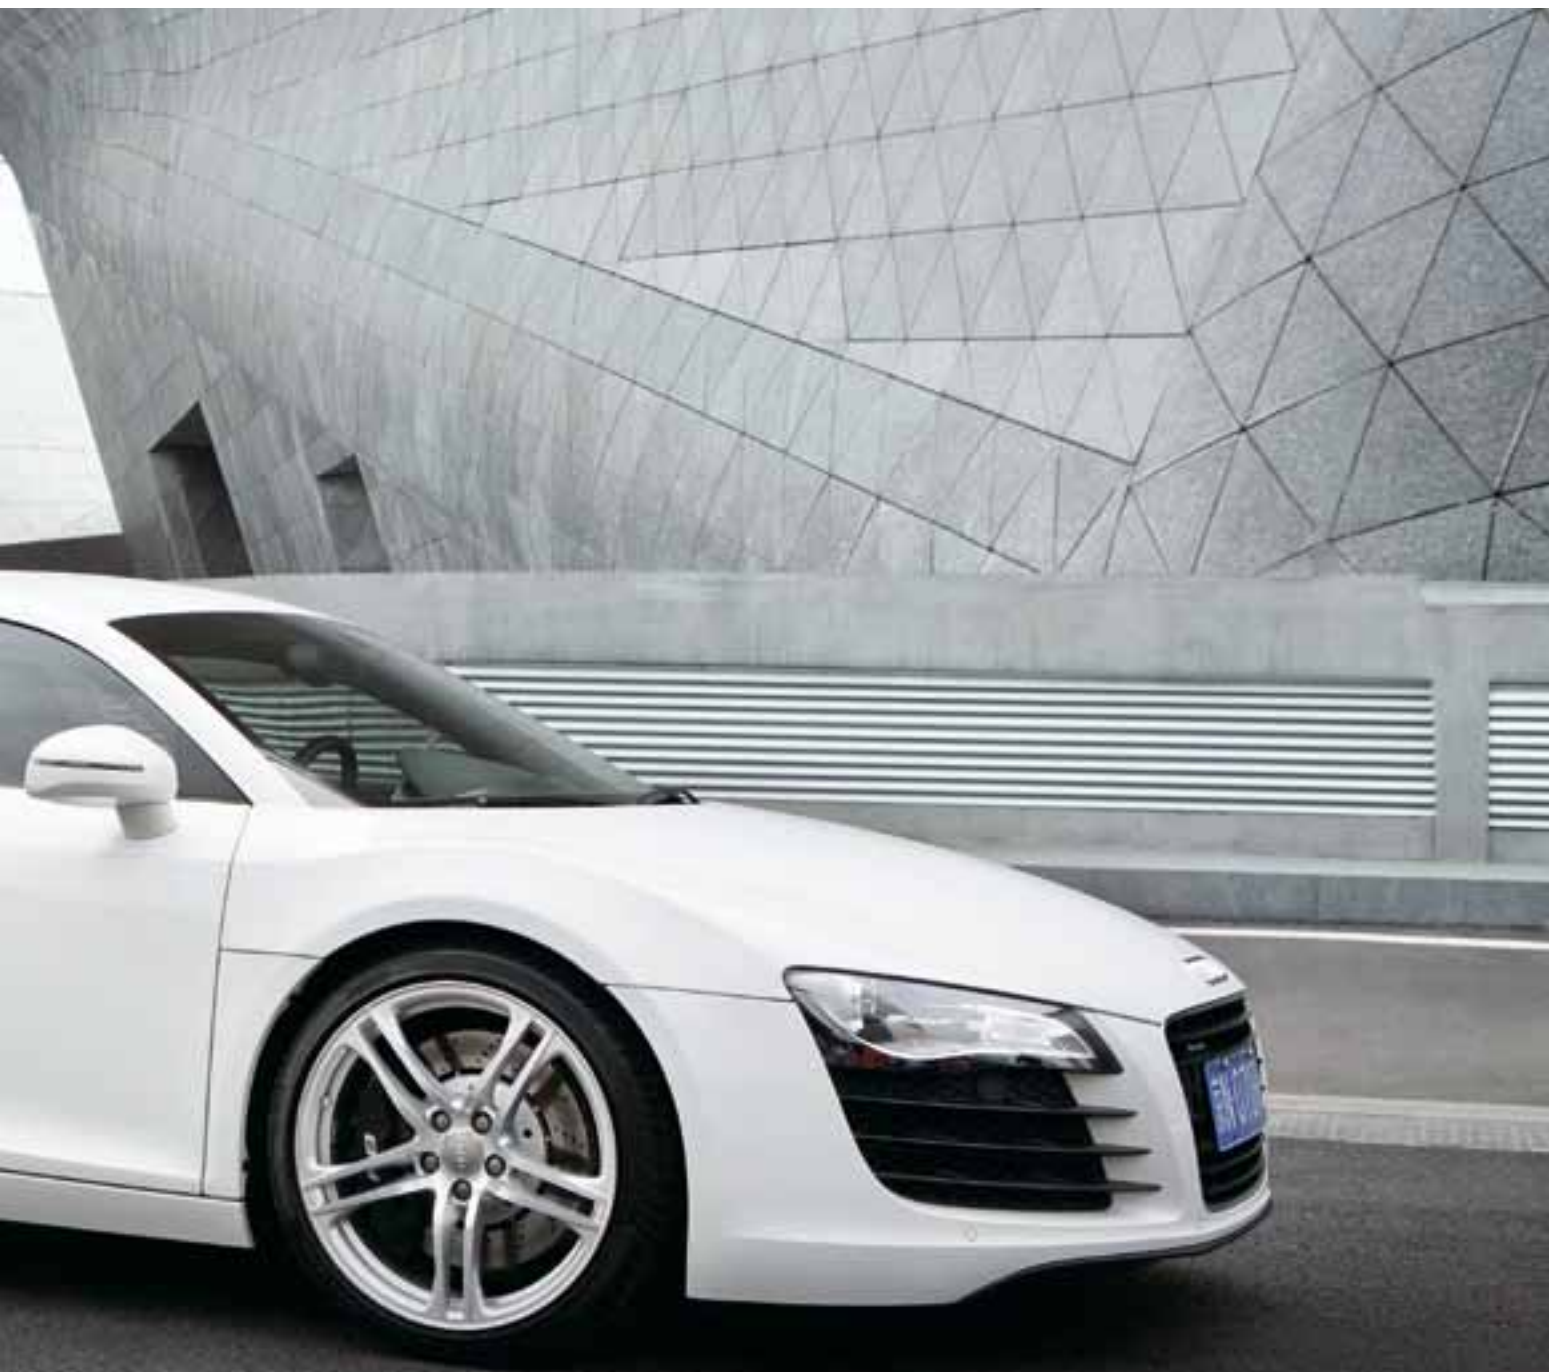

Der Konzertabend gestern war lang: ein umjubelter Auftritt mit Kompositionen von George Gershwin und dem chinesischen Komponisten Yin Chengzong, stehenden Ovationen und zwei Zugaben. Nun ist es später Vormittag und Lang Lang, Weltklassepianist und Chinas großer internationaler Superstar, hat Zeit für sich. Zeit zum Ausspannen. Zeit für eine Fahrt durch das südchinesische Guangzhou, mit über sieben Millionen registrierten Einwohnern eine der großen Megacities des Landes.

#### **AUTOMOBILER GENUSS IN DER METROPOLE**

„Ich liebe Autofahren“, sagt Lang Lang. „Am Steuer eines tollen Wagens zu sitzen, ist ein großartiges Erlebnis.“ Wen wundert es da, dass Lang Langs Lieblingsauto ein reinrassiger Sportwagen ist: der Audi R8. „Der R8 ist fantastisch, jung und schnell“, schwärmt der Pianist. Auch am Steuer ist er ganz

Musiker. „Dieser Klang ist einfach unglaublich“, meint er. „Und erst die Bewegung!“ Er genießt jeden Kilometer durch Guangzhous Innenstadt. Draußen ziehen futuristische Glas-türme vorbei, Einkaufsboulevards und der elegante Fernsehturm, mit 610 Metern der höchste der Welt. Er ist das neue Wahrzeichen der am Perlfluss gelegenen Stadt. „Vor mehr als zehn Jahren, zur Zeit meiner ersten Konzerte in Guangzhou, gab es das alles noch nicht“, erinnert sich Lang Lang.

Guangzhou, Hauptstadt der Provinz Guangdong und wichtigster Verkehrsknotenpunkt Südchinas, hat sich den Ruf „Fabrik der Welt“ erarbeitet. Südchina gilt als Wachstumsmotor – auch für die Automobilindustrie. Der Volkswagen Konzern plant unweit von Guangzhou ein neues Werk, das ab 2013 rund 4.000 Mitarbeiter beschäftigen wird. Die Modernität von Guangzhou sowie die Nähe zu Hongkong und Macau locken viele junge

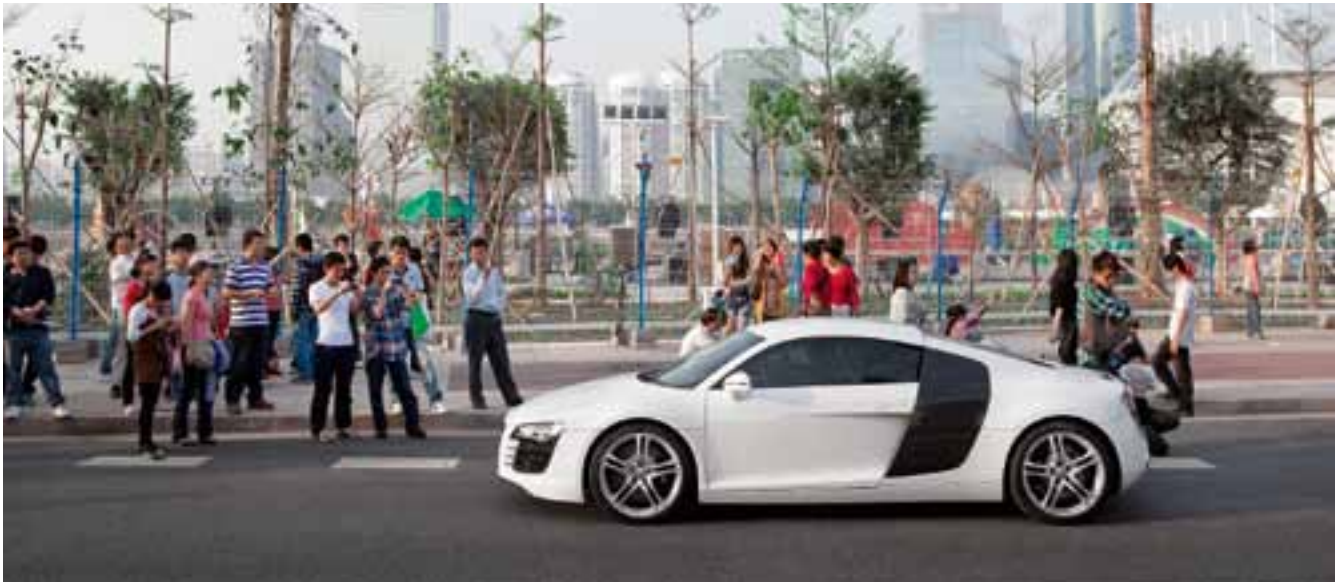

„Der Audi R8 ist fantastisch, jung und schnell.

Dieser Klang ist unglaublich – und erst die Bewegung!“ LANG LANG

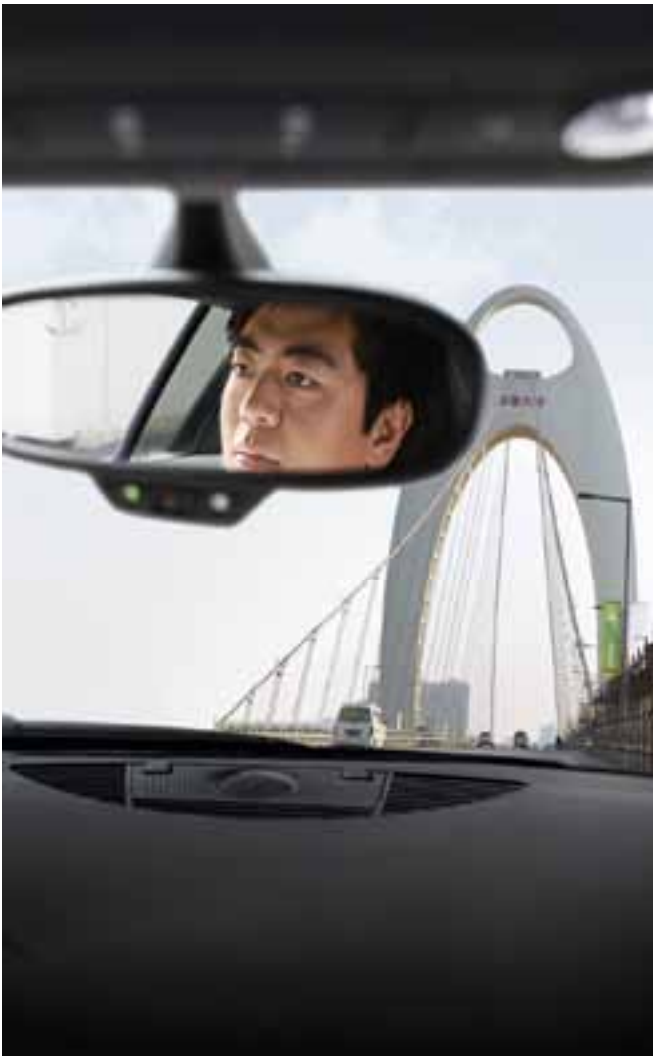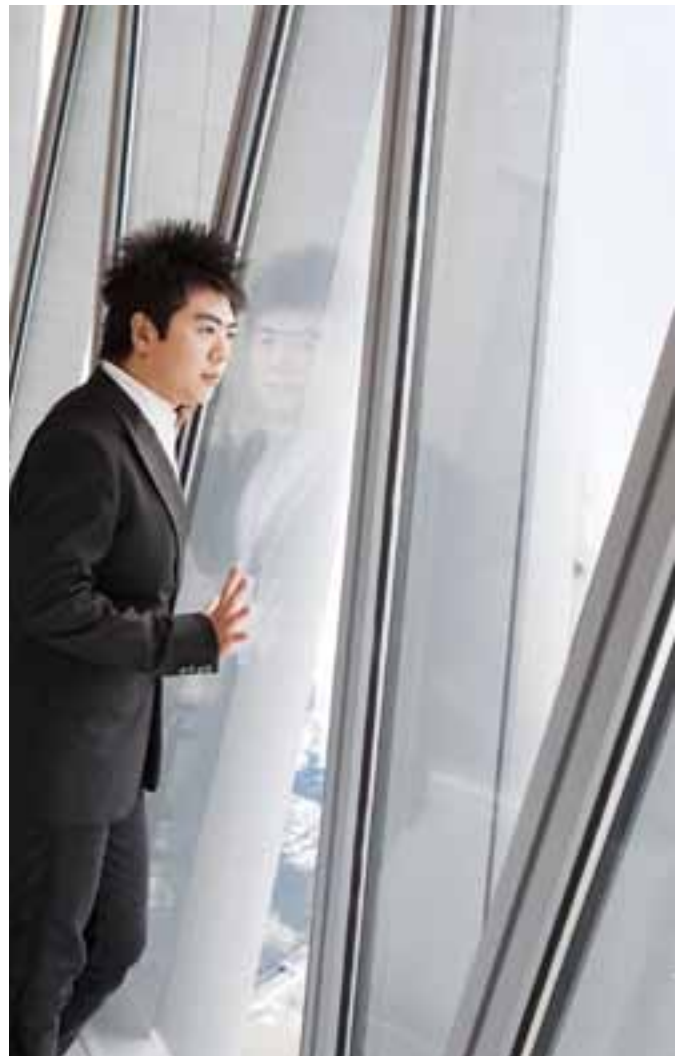

# „Die Marke Audi wird die Zukunft im automobilen Boomland China wesentlich mitgestalten.“ LANG LANG

Menschen in die Stadt. Chinas Entwicklungstempo, für das Guangzhou wie kaum eine andere Stadt Sinnbild ist, sucht weltweit seinesgleichen und gehört für junge Chinesen doch zur Normalität. „Für meine Generation ist diese Dynamik ein Teil unseres Lebensgefühls“, sagt der 28-Jährige.

Eher vorsichtig tritt Lang Lang auf das Gaspedal. Der Audi R8 beschleunigt in 4,6 Sekunden auf 100 Stundenkilometer. Erst bei über Tempo 300 ist Schluss. Doch Geschwindigkeit ist für die Autoenthusiasten in China nicht alles – sie sind auch Technik-Kenner. Der Supersportwagen von Audi verdankt seine Höchstleistungen unter anderem der Audi Space Frame-Bauweise ASF, einer sehr leichten und gleichzeitig sehr stabilen Struktur aus Aluminiumprofilen, die die Aluminium-Karosserieteile trägt. Mit 1.560 Kilogramm ist der R8 ein Leichtgewicht in seiner Klasse.

## DAS AUTO – SYMBOL DES AUFSTIEGS

Das dynamische Zusammenspiel von Technik, Design und Fahrspaß trifft den Nerv der jungen Elite Chinas. „In meiner Pekinger Nachbarschaft sehe ich den R8 in immer mehr Garagen stehen“, erzählt der Starpianist. Statussymbole einer neuen Ära. Noch in Lang Langs Kindheit war China ein Land der Fahrradfahrer. „Ein Auto zu besitzen war in den Achtzigerjahren für die meisten Menschen ein unerreichbarer Traum“, erinnert er sich. „Deswegen lieben Chinesen ihre Autos heute umso mehr: Einen eigenen Wagen zu haben, ist ein Zeichen dafür, dass man es geschafft hat.“

Wie ein guter Musiker entwickelt sich auch der Audi Supersportwagen immer weiter: Im Herbst 2010 stellte Audi auf der Automobilmesse in Paris die Studie „e-tron Spyder“ vor – eine Vision der Mobilität von morgen. In dem offenen Sportwagen wird die Vorderachse von zwei Elektromotoren angetrieben, die Hinterachse von einem V6 TDI-Motor – ein Plug-in-Hybridantrieb mit viel Zukunftspotenzial. „Effizientere Autos sind die Zukunft“, ist auch Lang Lang überzeugt. „In Chinas Großstädten leben so viele Menschen auf engem Raum, dass sie automatisch zu Experimentierfeldern für neue Konzepte

zu Transport und Infrastruktur werden.“ Bis zu 50 Kilometer schafft der e-tron Spyder allein mit elektrischer Kraft. Für den Besuch eines Lang-Lang-Konzerts könnte das reichen. Und wenn nicht: Im Sportwagen der Zukunft stehen noch ausreichend Pferdestärken aus konventioneller Quelle zur Verfügung.

Lang Lang ist Audi Markenbotschafter – aus Überzeugung. Die Marke, da ist er sich sicher, wird die Zukunft im automobilen Boomland China wesentlich mitgestalten. Audi war einer der Pioniere in China. Schon 1988 schloss der Autobauer mit dem chinesischen Fahrzeughersteller First Automotive Works (FAW) den ersten Lizenzvertrag für die Fertigung des Audi 100. Seither ist das Unternehmen unangefochtener Marktführer im Premiumsegment und lieferte im Oktober 2010 das millionste Fahrzeug an einen chinesischen Kunden aus. Die nächste Million wird wohl schon binnen der nächsten drei Jahre erreicht sein. In China werden heute bereits die Limousinen Audi A6 L und Audi A4 L – speziell für den chinesischen Markt – sowie der Kompakt-SUV Audi Q5 gefertigt. Derzeit baut Audi die Produktionskapazität im Land weiter aus.

Lang Lang ist am Ziel seiner Fahrt durch Guangzhou angekommen: dem spektakulären neuen Opernhaus, entworfen von der britischen Stararchitektin Zaha Hadid. Weich fließende Formen sind ihr Markenzeichen. Eine Formensprache, die Chinas Dynamik perfekt symbolisiert. Konzerthallen, Theater und Galerien zählen ebenso wie Autos zu den Symbolen des Aufschwungs in China. „Heute gibt es solche kulturellen Aushängeschilder in fast jeder Stadt“, erklärt Lang Lang, „und überall lernen die Kinder Klavier spielen.“ Oft werde er von Fans nach seinem Erfolgsgeheimnis gefragt. „Das ist eigentlich ganz einfach“, antwortet er dann. „Man muss lediglich das machen, woran man Freude hat.“ Ob am Klavier oder hinter dem Steuer.

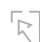

**WEITERE INFORMATIONEN**  
[www.audi.de > R8](http://www.audi.de > R8)

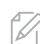

**AUTOR**  
Bernhard Bartsch



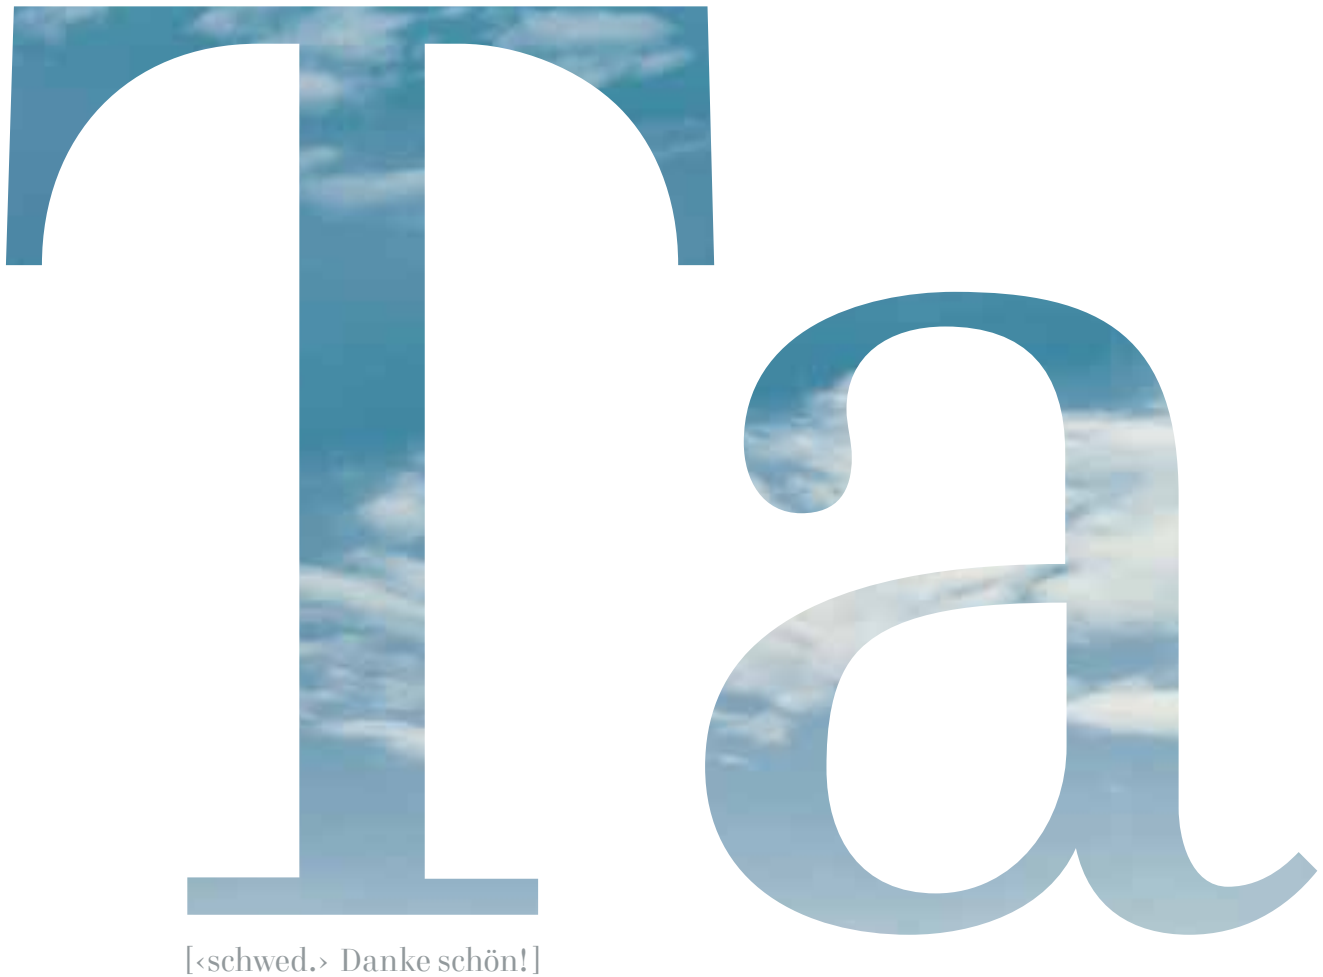

Scania hat sich der Nachhaltigkeit verschrieben, genauso wie Schwedens Hauptstadt Stockholm. Gemeinsam entwickelt man hier den öffentlichen Nahverkehr für heute und morgen – saubere Transportsysteme und der Einsatz von Biokraftstoffen gehören dazu. Eine Bustour durch die Stadt auf Inseln zeigt, was machbar ist. Stadt, Natur und Mensch sagen „Tack!“ – „Danke schön!“.

In den Tagen vor der Fototour hatte es in Stockholm geschneit, dann bis kurz vor dem Termin ohne Unterlass geregnet. Als aber der rote Stadtbuss vorfährt und der Fotograf die Kamera auspackt, reißt die Wolkendecke auf. Plötzlich wirkt das Wasser, das das mittelalterliche Altstadtviertel Gamla Stan umgibt, nicht mehr grau, sondern silbern. Sattes Blau spiegelt sich darin. Sie kann losgehen, die Fahrt mit dem Ethanol-Linienbus durch Schwedens Hauptstadt.

Die leuchtend roten Stadtbusse sind ein Symbol für das, was in der Metropole an der Ostsee schon lange gelebt wird: Nachhaltigkeit im öffentlichen Nahverkehr. Schon 1989 rollte die erste Ethanol-Bus-Testflotte durch Stockholm, natürlich aus dem Hause Scania. Die Busse des schwedischen Nutzfahrzeugherstellers prägen seit 100 Jahren das Bild der Hauptstadt. Der Erfolg des frühen „grünen“ Verkehrs: Heute sind 75 Prozent der Stockholmer „öffentlich“ unterwegs – mit der U-Bahn „Tunnelbana“, auf Fähren oder im Bus. Alle

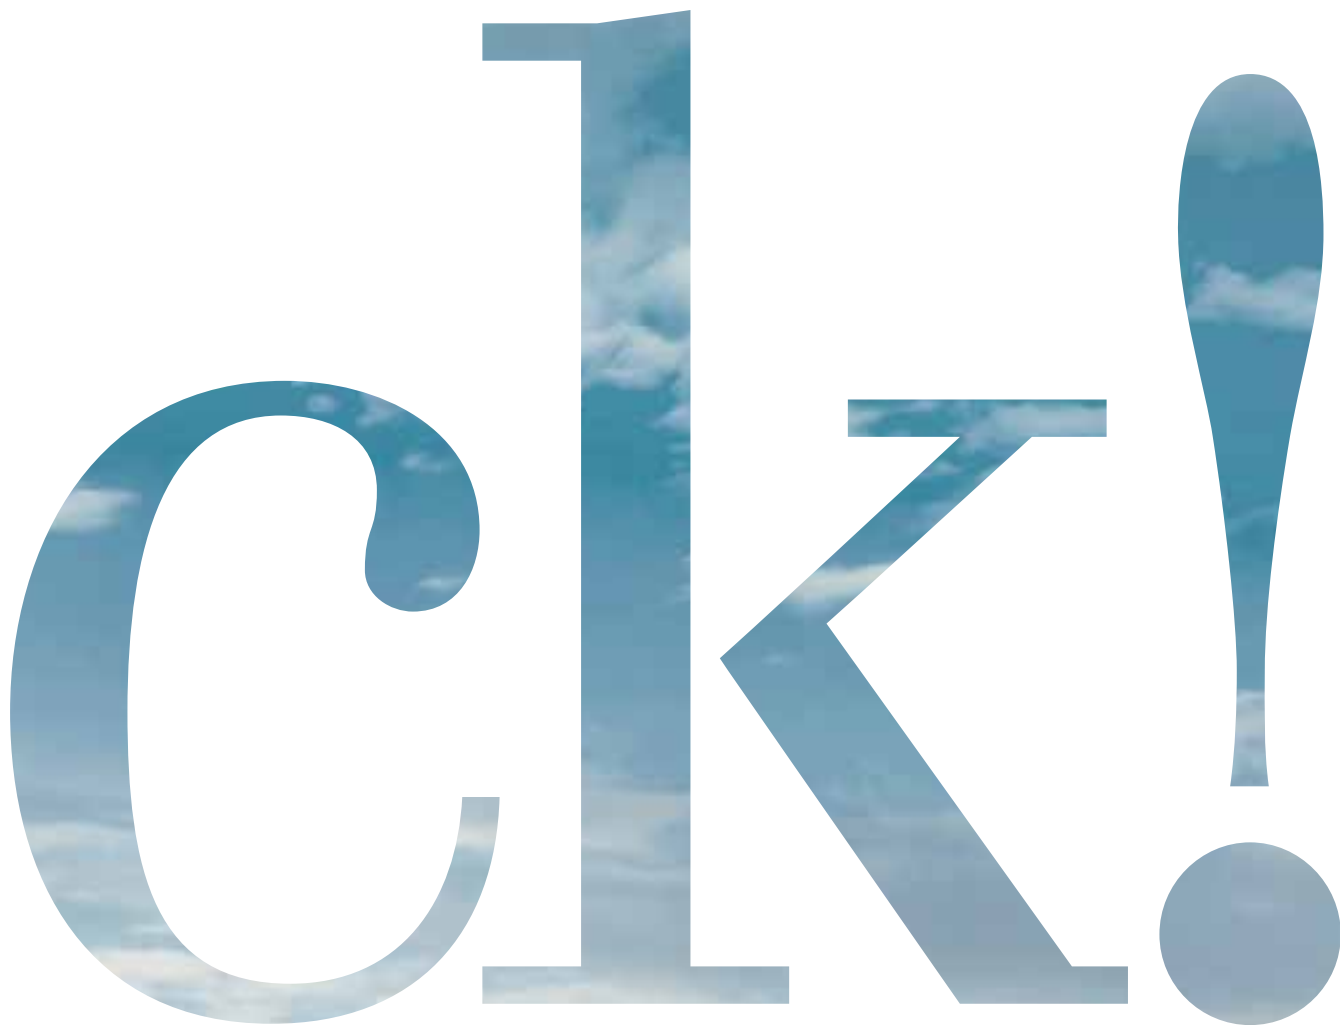

städtischen Nahverkehrsbusse fahren entweder mit Bioethanol oder Erdgas, wie übrigens auch 40 Prozent der in der Stadt zugelassenen Personenwagen. Scania hat wesentlich dazu beigetragen, den Stockholmer Verkehr sauberer zu machen: Mehr als 600 Bioethanol-Busse lieferte der Nutzfahrzeugbauer seit 1989 an die Stadtverkehrsbetriebe aus.

#### **STOCKHOLM MACHT SCHULE**

Vorfahrt für die „Öffentlichen“ – das ist ein wesentlicher Grundsatz des von der Stadt Stockholm und Scania entwickelten Konzepts „Bus Rapid Transit“, dank dessen die Busse auf eigenen Fahrspuren und in sehr kurzen Taktzeiten unterwegs sind. Dieses Konzept wird mittlerweile auch in anderen Metropolen umgesetzt, darunter Bangkok in Thailand, Curitiba in Brasilien und Bogotá in Kolumbien. Damit auch die Menschen im südafrikanischen Johannesburg in Zukunft schnell und umweltfreundlich unterwegs sind, lieferte Scania jüngst 143 moderne Stadtbusse in die Millionenmetropole – alle motorisiert mit verbrauchsarmen Dieselantrieben.

In Stockholm nimmt der Bus gerade Kurs auf das Königliche Stadtschloss – mit seinen mächtigen Mauern ein nicht sehr heimeliger, dafür aber umso imposanterer Bau. Es ist Werktag, Rushhour, aber der Verkehr fließt. Ein paar Autos stehen an der Ampel, die alle Wartenden aber schon in der nächsten Grünphase passieren lässt. Seit 2007 erhebt die Kommune für Fahrten in die Innenstadt eine Maut. „Das war am Anfang für viele eine Umstellung“, erinnert sich Jonas Strömberg. „Aber manchmal muss man unbequeme Wege gehen, um etwas Sinnvolles zu erreichen.“ Strömberg, als Director of Sustainable Solutions Vordenker für nachhaltige Lösungen bei Scania, begleitet uns auf der Stadttour, zusammen mit Björn Westman, Chef-Motorenentwickler des Unternehmens.

Strömberg ist ein Mann der ersten Stunde. In den Neunzigerjahren arbeitete er bei den Verkehrsbetrieben an den heute als zukunftsweisend geltenden Stockholmer Konzepten mit. Die Idee des nachhaltigen Transports hat ihn auch bei Scania nicht losgelassen. Mit seinem Kollegen Westman ist sich Strömberg

einig: Nachhaltigkeit ist das Ergebnis vieler kleiner Schritte. Und zwar vor Ort, wie hier in seiner Heimatstadt Stockholm.

Der Bus mit seinem 270 PS starken 9,0-Liter-Dieselmotor fährt vorbei am Reichstag, dem Sitz des schwedischen Parlaments. Nächster Stopp: die Insel Riddarholmen, wo prachtvolle Stadthäuser die Uferstraße säumen. Von dort ist der Blick frei über das Wasser bis hin zum Rathaus mit seinem 106 Meter hohen Turm. Im „Stadshuset“ findet jährlich das Nobelpreis-Bankett statt. 1911 hielt dort die frischgebackene Chemie-Nobelpreisträgerin Marie Curie eine Rede. Im selben Jahr fuhr der erste von Scania gebaute Bus durch die Stadt.

#### NACHHALTIG UNTERWEGS IN DER STADT

In diesen letzten 100 Jahren hat sich die Einwohnerzahl von Stockholm auf heute rund 800.000 Menschen nahezu verdreifacht – im Vergleich zum Wachstum der Megacities in Asien eine sanfte Urbanisierung. Gleichwohl beschäftigt Strömberg und Westman dieses Thema ebenso wie die globale Klimaerwärmung und die Verknappung fossiler Rohstoffe. Das seien große Herausforderungen für Natur und Menschen, aber auch für die Wirtschaft. Strömberg zeigt sich dennoch optimistisch: „Sie sind lösbar.“ Deshalb engagiert sich Scania in dem 2008 von der schwedischen Regierung gestarteten Projekt „SymbioCity“. Unternehmen wie Institutionen, Automobilfirmen genauso wie Kraftstoffproduzenten und Infrastrukturbetreiber arbeiten in diesem Netzwerk an einem gemeinsamen Ziel: der nachhaltigen Urbanität. Es geht um die Reduzierung von CO<sub>2</sub>-Emissionen und um mehr Wirtschaftlichkeit bei der Nutzung von Energie und Transportsystemen.

Auf der Insel Skeppsholmen steigen junge Leute zu, Studenten auf Reisen. Sie kommen von der „Af Chapman“, einem stolzen Dreimaster, der seit 1949 als schwimmende Jugendherberge genutzt wird. Strömberg und Westman diskutieren inzwischen über automobilen Zukunftstechnologien. Scania arbeitet intensiv an Hybridkonzepten und schickte 2009 sechs Prototypen mit Ethanol-Hybridantrieb zum Testdienst in Stockholms Nahverkehr. Der Hybridantrieb kann den Kraftstoffverbrauch bis zu 25 Prozent senken, nimmt aber keinen Einfluss auf die verbleibenden 75 Prozent CO<sub>2</sub>-Ausstoß. Um einer wirklich CO<sub>2</sub>-neutralen Transportlösung nahezukommen, müssen Biokraftstoffe verwendet oder Elektroantriebe mit Strom aus regenerativen Quellen eingesetzt werden. Batterien für Hybrid und Elektrofahrzeuge sind heute noch sehr teuer, aber man rechnet damit, dass die Kosten weiter sinken.

#### NACHWACHSENDE KRAFTSTOFFE

„Wir müssen unterschiedliche Maßnahmen, wie Fahrertrainings, Flottenmanagement, Biokraftstoffe und energieeffizientere Fahrzeuge kombinieren, um nachhaltigen Transport

möglich zu machen. Vieles davon können wir hier und jetzt tun. Manches allerdings, wie Hybrid-Busse im Serieneinsatz, ist heute noch nicht wirtschaftlich darstellbar“, sagt Strömberg.

Stockholms Scania Busse fahren mit Bioethanol, das zu 50 Prozent als Nebenprodukt in einer schwedischen Zellstofffabrik hergestellt wird. Die andere Hälfte wird aus Pflanzen wie Zuckerrohr oder aus landwirtschaftlichen Abfallstoffen gewonnen. Für Bioethanol spricht: Es reduziert im Vergleich zu herkömmlichem Diesel die CO<sub>2</sub>-Emissionen um bis zu 90 Prozent. Dabei können moderne verbrauchseffiziente Dieselmotoren eingesetzt werden, ohne dass aufwendige technische Änderungen notwendig wären. Ethanol dominiert heute mit einem Anteil von 90 Prozent den Markt der Biokraftstoffe. Diese könnten nach Strömbergs Einschätzung bis 2020 mindestens 20 Prozent der fossilen Kraftstoffe ersetzen.

#### FAHREN MIT KÖPFCHEN

Das Engagement von Scania endet jedoch nicht bei effizienten Antrieben, sondern setzt sich unter dem Schlagwort „intelligenter Transport“ fort. Dazu gehören Fahrertrainings, bei denen Berufskraftfahrer den sparsamen Umgang mit dem Gaspedal lernen. Eine Reduzierung des Verbrauchs um bis zu zehn Prozent und damit eine deutlich höhere Wirtschaftlichkeit sei so erreichbar, bestätigt Westman. Auch im Busgeschäft kommen die besten Ergebnisse in enger Zusammenarbeit mit den Kunden zustande. So hat Scania gemeinsam mit einem schwedischen Busbetreiber für eine deutlich höhere Verfügbarkeit und Verlässlichkeit seiner Busflotte gesorgt: Scania hat einen Großteil der Werkstätten übernommen und leistet nun alle Dienstleistungen und Reparaturen der gesamten Flotte. „Gemeinsam mit dem Kundendienst und den Verkehrsplanern haben wir dafür gesorgt, dass die Betriebsbereitschaft der Busflotte jetzt bei unglaublichen 99,6 Prozent liegt“, so Strömberg.

Der Bus umkreist jetzt den Springbrunnen mit der markanten Glasskulptur am Sergels Torg. Ein Platz, an dem die Stadt ihr Gesicht aus den Siebzigerjahren zeigt. Von dort ist es nicht weit zum Hauptbahnhof, dem zentralen Knotenpunkt der Stockholmer U-Bahnen, Stadt- und Fernbusse. Endstation. Die Fotos sind im Kasten, der frühe Abend knipst das Licht aus. Rund 50 Liter Bioethanol verbraucht der Bus auf 100 Kilometern Stadtfahrt im ständigen Wechsel von Anfahren und Abbremsen. Alles in allem eine saubere Sache.

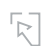

**WEITERE INFORMATIONEN**  
[www.scania.com](http://www.scania.com) > Products & Services  
 > Buses & Coaches > Environment

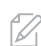

**AUTORIN**  
 Tina Rumpelt



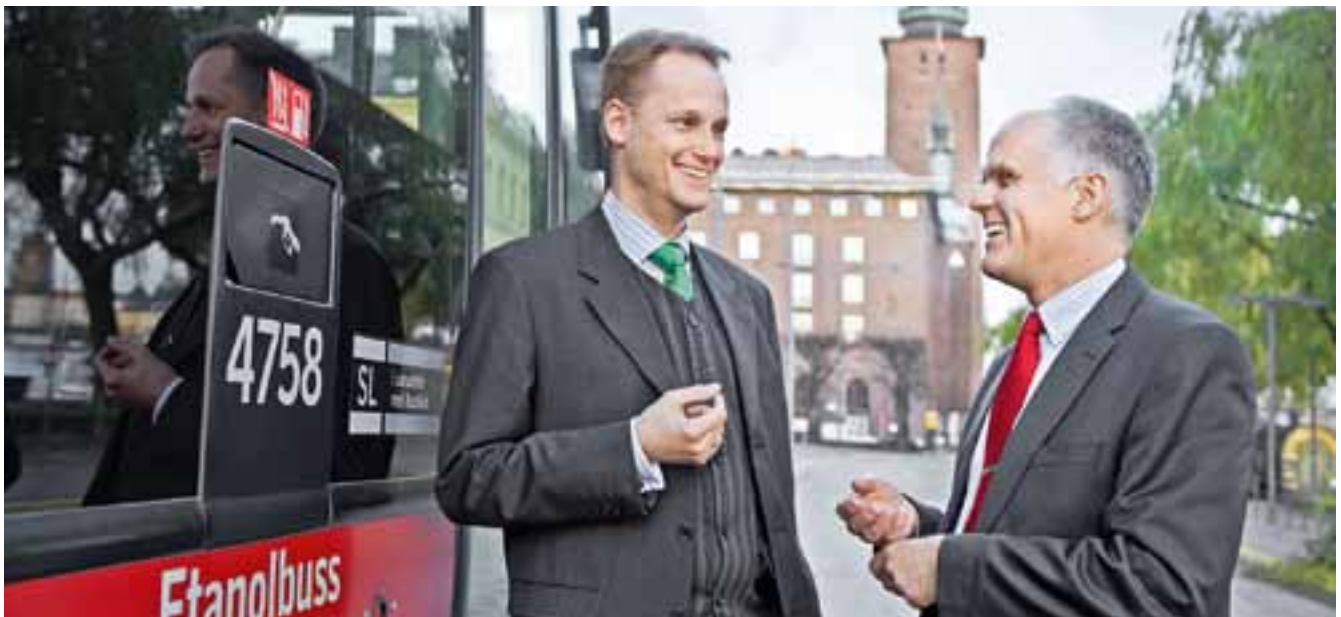

VORDENKER FÜR EINE SAUBERE UMWELT – Nachhaltigkeitsexperte Jonas Strömberg (links) und Björn Westman, Leiter der Motorenentwicklung bei Scania.

„Nachhaltigkeit ist das Ergebnis vieler kleiner Schritte.“

BJÖRN WESTMAN, SCANIA CHEF-MOTORENENTWICKLER

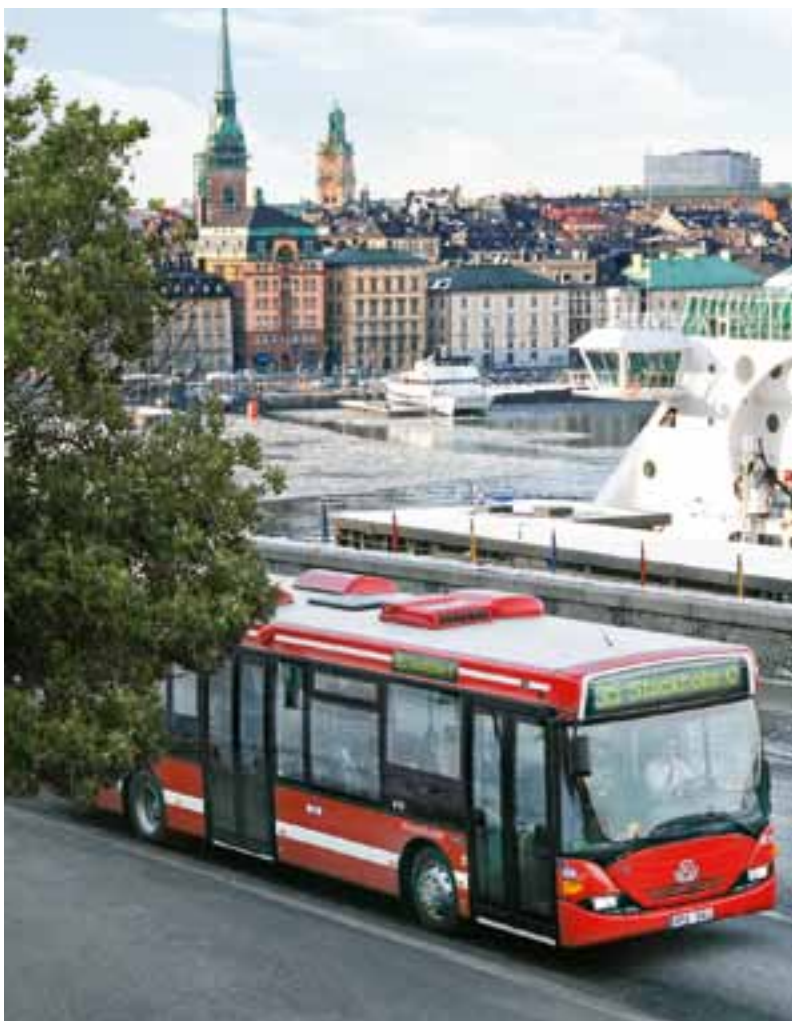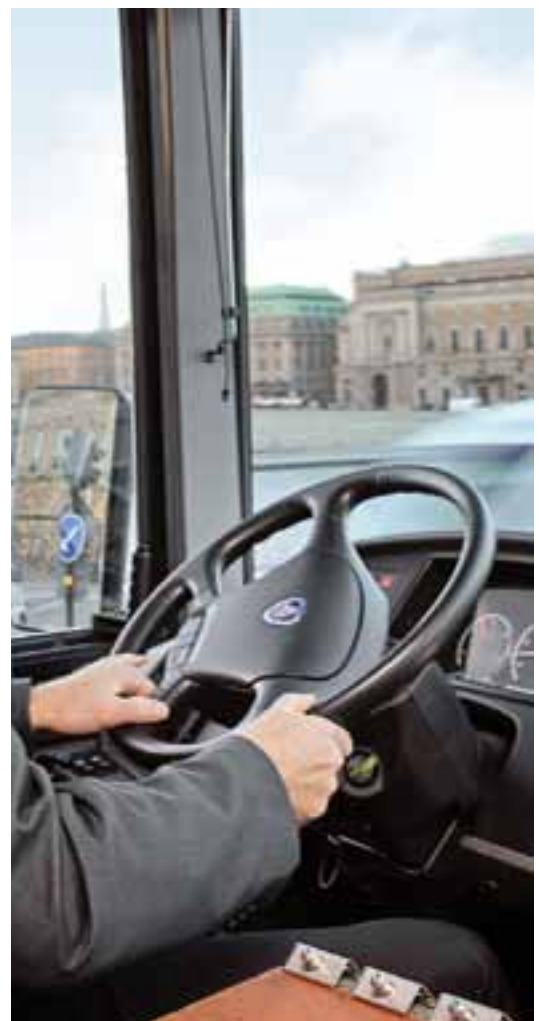

ESSAY

# Musica mobile.

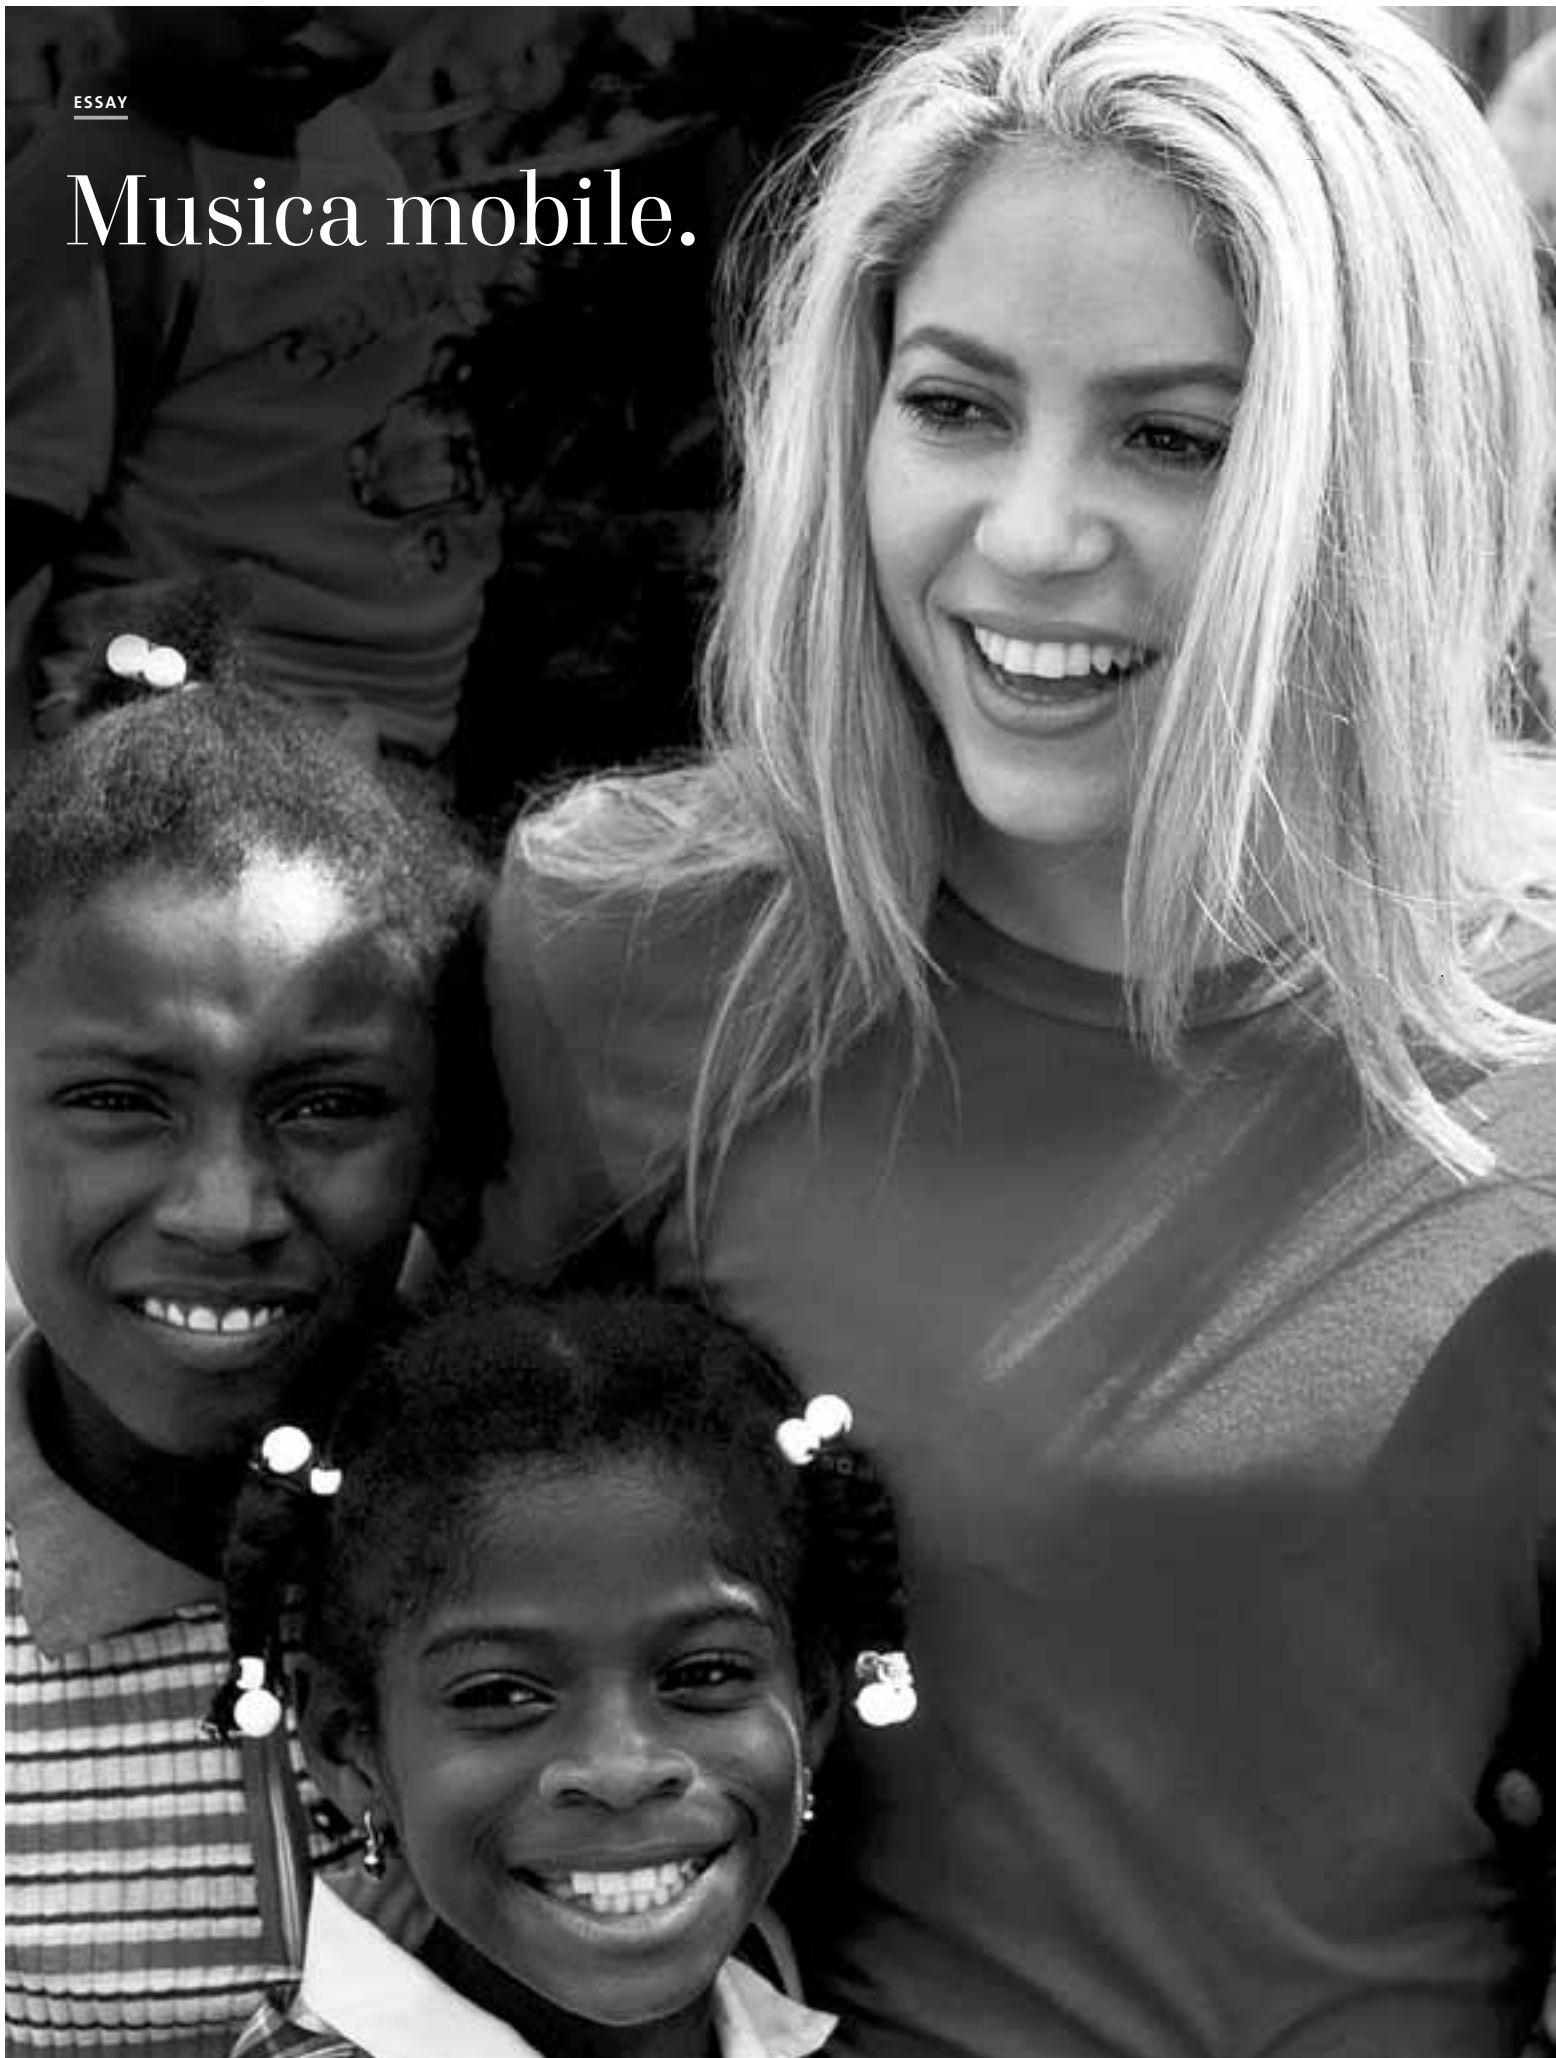

Music and mobility are a symbol  
of liberation for young people. SHAKIRA

Als kleines Mädchen wollte ich ganz schnell erwachsen werden, nur um selber Auto fahren zu können. Und ich liebe es noch immer, im Auto unterwegs zu sein. Mit zehn Jahren stand ich zum ersten Mal auf der Bühne, bei einem Song-Contest, und schon als Jugendliche saß ich zum ersten Mal am Steuer. Mein erstes eigenes Auto war dann eine hellblaue Schrottkiste. Ich kaufte es von meiner ersten Gage als Sängerin. Ich konnte damit fahren, wohin ich wollte und wann ich wollte: Für mich bedeutete es Freiheit und Mobilität. Musik und Mobilität sind überall auf der Welt ein emotionales Paar – und sie sind für junge Menschen Instrumente der Befreiung.

Aber mit dieser Befreiung kommt auch die Verantwortung. Die jungen Menschen haben heute ein außergewöhnliches Gespür dafür, Wandel anzutreiben und gegen soziale Ungerechtigkeit zu kämpfen. Ich bin glücklich, dass mir mein Beruf die Möglichkeit gibt, das Scheinwerferlicht von mir selbst auf wichtigere Themen zu lenken, wie den Zugang zu qualifizierter Bildung für alle Kinder. Durch meine Jugend in einem Entwicklungsland habe ich aus erster Hand erlebt, wie schwer es ist, den Teufelskreis aus Armut und Ungleichheit zu durchbrechen, wenn Bildung als Luxusgut und nicht als Grundrecht verstanden wird. Ich bin fest davon überzeugt, dass Bildung der Schlüssel für den Weg aus der Armut und für eine gute Zukunft für alle jungen Menschen ist.

Als ich mit 18 mein erstes erfolgreiches Album herausbrachte, sah ich die Chance, etwas zurückzugeben. Ich entschied mich, eine Stiftung in Kolumbien zu gründen, die Barefoot Foundation. Seitdem arbeiten wir hart daran, Bildung und Ernäh-

rung für Kinder sowie eine berufliche Ausbildung für deren Eltern bereitzustellen, in Schulen, die auch als Begegnungsorten dienen. Heute betreibt die Stiftung, die unter anderem durch SEAT unterstützt wird, sechs Schulen in Kolumbien mit über 5.000 Kindern. Wir haben noch einen weiten Weg vor uns, bevor Bildung für alle zur Realität wird, aber ich glaube, wir sind auf dem richtigen Weg. Mit der Unterstützung vieler Entscheidungsträger und junger Menschen aus aller Welt sowie der Hilfe von engagierten Unternehmen können wir den Wandel schneller herbeiführen als wir es uns je erträumt haben.



#### SHAKIRA

Grammy-Preisträgerin Shakira ist Sängerin, Songwriterin und Produzentin. In Baranquilla, Kolumbien, geboren, hat Shakira weltweit mehr als 50 Millionen Platten verkauft und ist mehrfach um den Erdball getourt. Als UNICEF-Botschafterin und Gründerin der Stiftungen Barefoot Foundation und ALAS, setzt sie sich vor allem für frühkindliche Entwicklung und den universellen Zugang zu Bildung ein. Dabei sucht sie immer wieder den Schulterschluss mit Entscheidern aus aller Welt, zum Beispiel im Rahmen der Global Campaign for Education, beim Iberoamerika-Gipfel und bei den Vereinten Nationen.



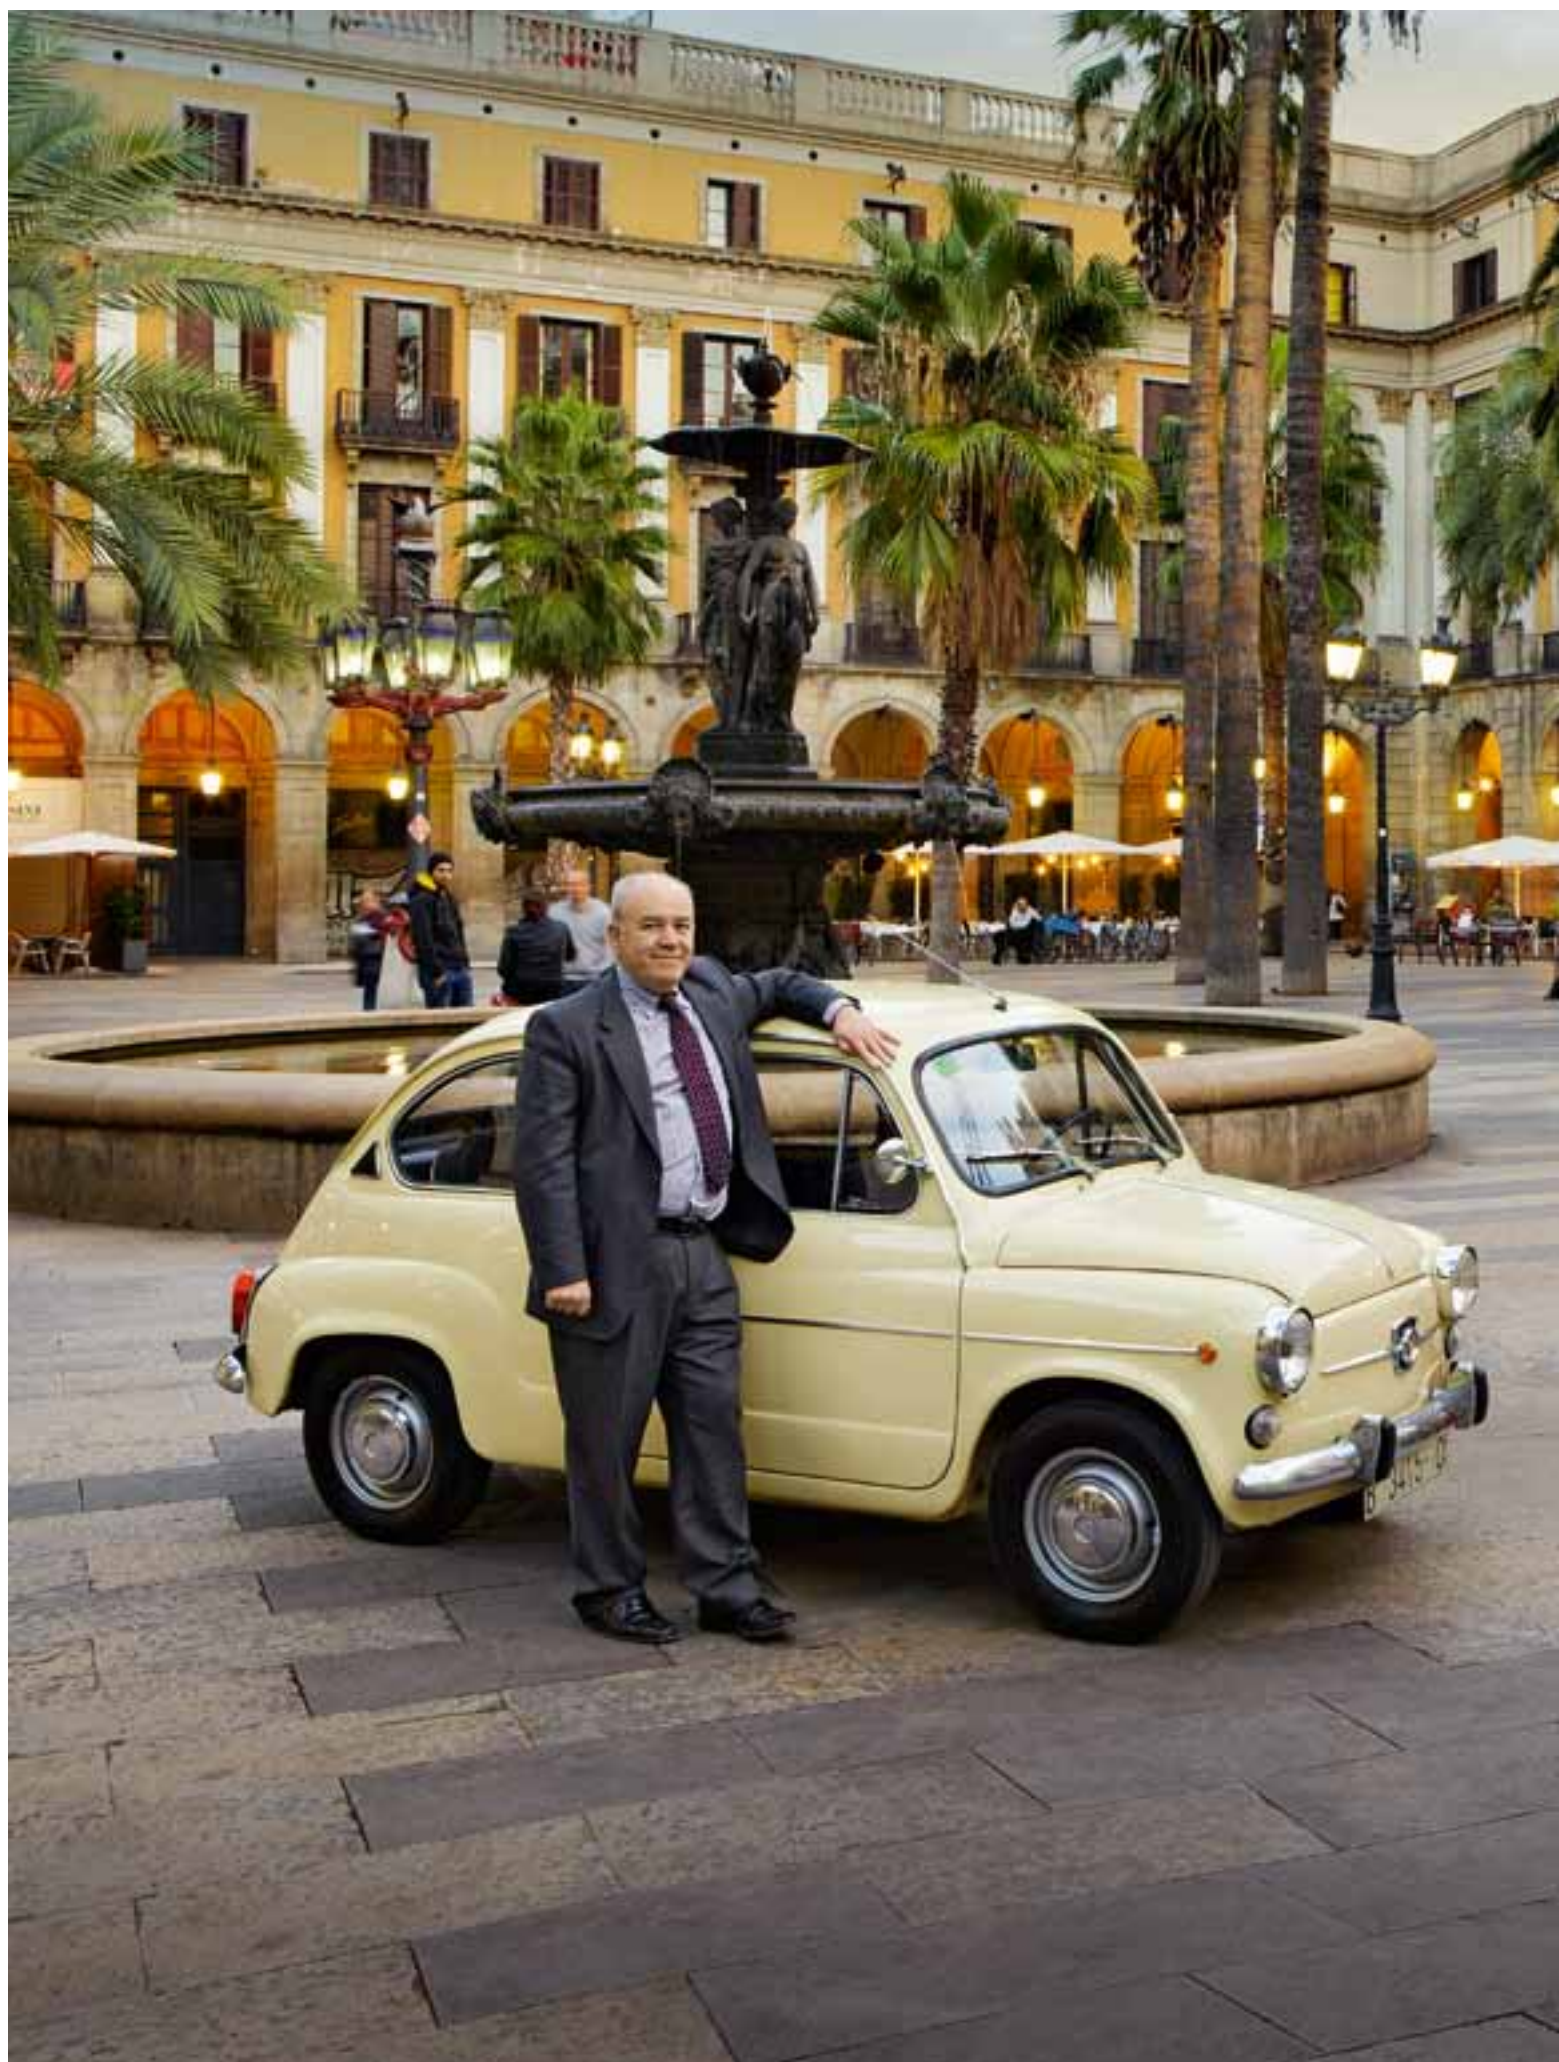



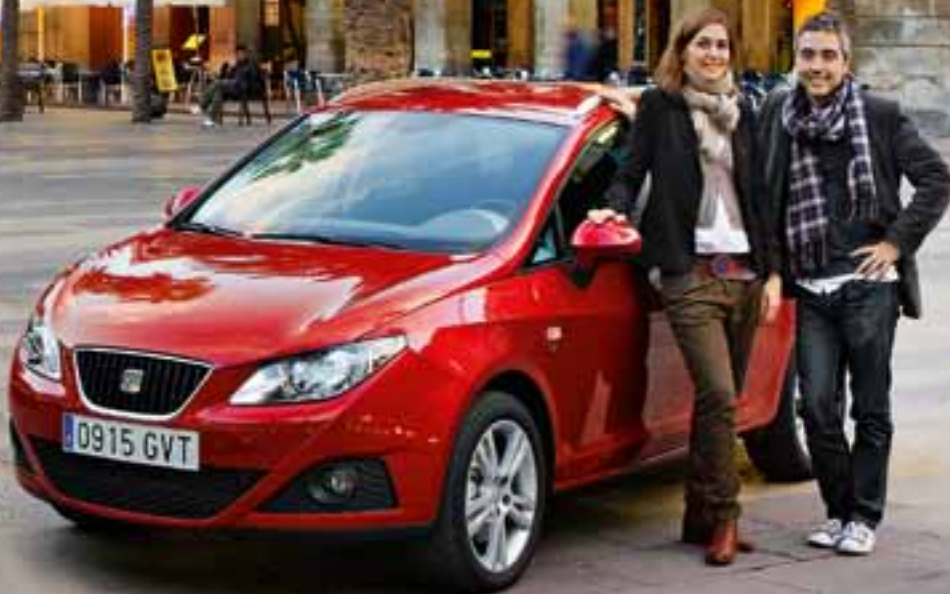

# Jung geblieben.

60 Jahre alt ist SEAT – und so jung wie nie zuvor. Einst mobilisierte die spanische Marke mit ihren robusten Kleinwagen das Land. Heute steht SEAT für junges Design, Modernität und Mobilität mit einer Extraprise Fahrspaß. Diese besondere Mischung aus hochklassiger Ingenieurskunst und purer Lebensfreude ist das Ergebnis der deutsch-spanischen Einflüsse auf die Marke. In Barcelona treffen sich die SEAT Generationen.

Die Möwen fliegen über den Stadtstrand von Barcelona, einige Windsurfer segeln übers tiefblaue Mittelmeer, am Horizont schwebt ein Flugzeug dem Flughafen entgegen. Auf der Terrasse der Strandbar „El Bierzo“ sitzen Francisco de Pablo, Clara Lamarca und Álex Blanco in der milden Herbstmorgensonne bei Kaffee und Croissants zusammen. De Pablo, jetzt im Ruhestand, war bis vor kurzem Produktionschef im SEAT Werk Martorell. An der Strandpromenade hat er einen Klassiker geparkt: einen cremefarbenen SEAT 600 aus den Sechzigerjahren. Daneben steht in feurigem Dakota-Rot der neue Ibiza ST des jungen Designerpaares Lamarca und Blanco.

#### **DER SEAT, DER SPANIEN MOTORISIERTE**

Der SEAT 600 weckt Erinnerungen. „Meine Eltern sind in so einem Auto zum Standesamt gefahren“, erzählt Lamarca. Und Blanco ergänzt: „Ein Onkel von mir besaß einen 600, den er lange und innig pflegte. Einmal durfte ich mich hinter Steuer setzen – ein großes nostalgisches Vergnügen.“ Francisco de Pablo schmunzelt. Er selbst hat in einem SEAT 600 die Führerscheinprüfung abgelegt. „Diesem Wagen verdankt das ganze Land seine Motorisierung“, sagt er. „Was der Volkswagen Käfer für die Deutschen war, das war der SEAT 600 für uns. Dieses Auto hat das Freizeitverhalten der Spanier völlig verändert.“

Francisco de Pablo ist aus einem Vorort von Barcelona zum SEAT Generationentreffen gekommen. Und er freut sich auf eine Tour am Steuer des blitzblanken Oldtimers durch die Stadt, die seit 50 Jahren seine Heimat ist. Nach dem Frühstück mit den zwei jungen Innendesignern will er den Oldtimer hinauf auf Barcelonas Hausberg Montjuïc entführen, des wunderbaren Ausblicks wegen. Lamarca und Blanco bleiben vorerst in der Stadt. Gegen Abend werden sich die beiden auf dem Plaça Reial, unweit der berühmten Flaniermeile Rambla, noch einmal mit de Pablo und seinem SEAT 600 treffen.

#### **GRAZIE, STIL UND EVOLUTION**

Sie verabschieden sich auf der Promenade an ihren Autos. Im Vergleich mit dem markant modernen Ibiza ST sieht der rundliche 600 richtig niedlich aus. „Da passten vier Elefanten, die Schwiegermutter und sogar noch der Kanarienvogel hinein“, sagt de Pablo, „zumindest kam es uns früher so vor.“ Er öffnet den Kofferraum, in den nach heutigen Maßstäben gerade so ein Stück Handgepäck passt. Der junge Innendesigner staunt, dann versucht er die Haube behutsam wieder zu schließen. Es gelingt ihm nicht. „Das geht nur mit Grazie und Stil“, erklärt de Pablo – stößt die Haube an und lässt sie einfach herunterfallen. Zu. Oldtimer-Liebhaber de Pablo hat aber auch ein Kennerauge für moderne Karossen. Er gibt sein Faible für SEAT preis: „Von Bauteil zu Bauteil, von Baujahr zu Baujahr lässt sich bei SEAT eine Evolution ablesen.“ Dann startet der 22-PS-Motor des 600, der Wagen entschlüpft seiner Parklücke und tuckert davon.

Die Generationen sind sich einig: „Am stärksten ist die Entwicklung der Marke SEAT im Design erkennbar. Und hier gilt für Autos wie für Architektur: Form und Funktionalität müssen im Einklang stehen. Wie das geht, zeigen die Ibiza-Modelle der vierten Generation. Sie sind ebenso schön wie alltagstauglich“, so Blancos Urteil. Wie Lamarca ist er in Barcelona aufgewachsen, beide haben dort an angesehenen Hochschulen für Gestaltung studiert. „Diese Stadt lebt und atmet gutes Design“, sagt Lamarca, „und jeden, der sich mit Design und Gestaltung beschäftigt, beeinflusst diese Stadt.“

#### **KLEINE AUTOMOBILE FLUCHTEN**

Barcelona ist eine turbulente, quicklebendige, aber auch etwas laute Metropole. Im Sommer belagern Touristen das Zentrum. Dann nehmen Lamarca und Blanco öfter Reißaus, fahren ans Meer, an die Costa Brava oder auch mal nach Südfrankreich. Sie sind gern unterwegs, spontan und unabhängig



„SEAT passt zu Barcelona – die Stadt ist modern  
und stilbewusst wie die Marke.“

ÁLEX BLANCO, SEAT FAHRER

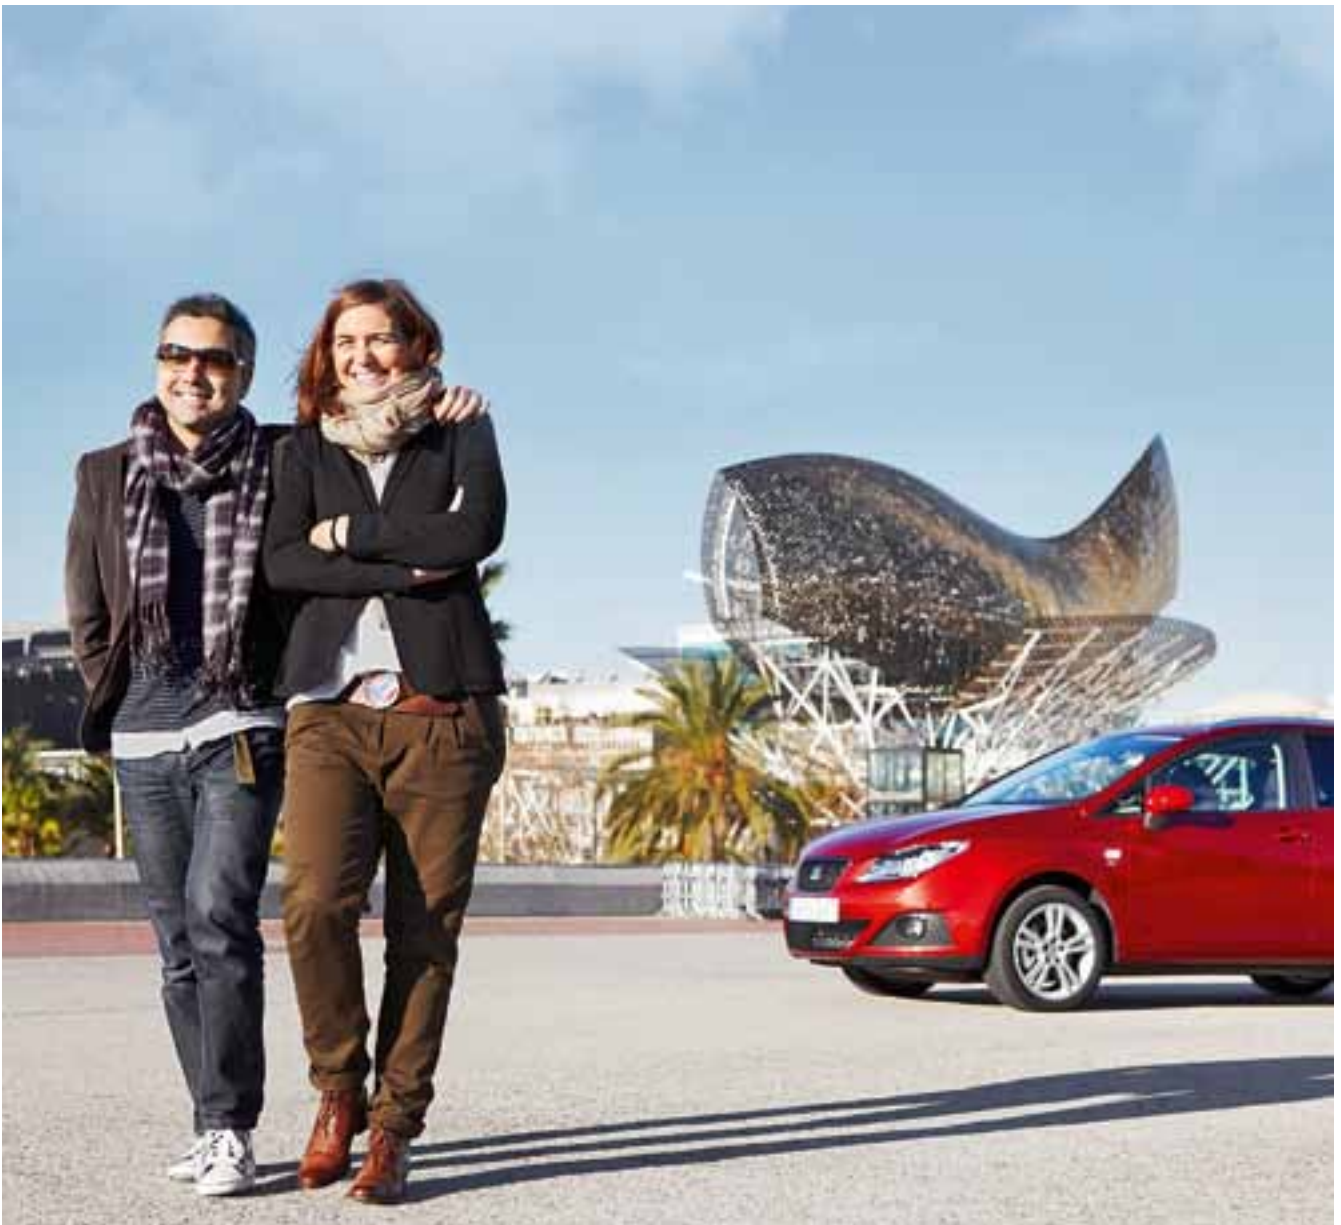

**BARCELONA, STADT DER MODERNE** – Zeitgenössische Architektur und Kunst prägen die Strandpromenade: Architekt Frank Gehry erschuf die Skulptur eines Fisches, die zu einem modernen Wahrzeichen der Stadt geworden ist.

## „Dieses Auto hat das Freizeitverhalten der Spanier völlig verändert.“

FRANCISCO DE PABLO, EHEMALIGER SEAT PRODUKTIONSCHEF UND SEAT-600-FAHRER

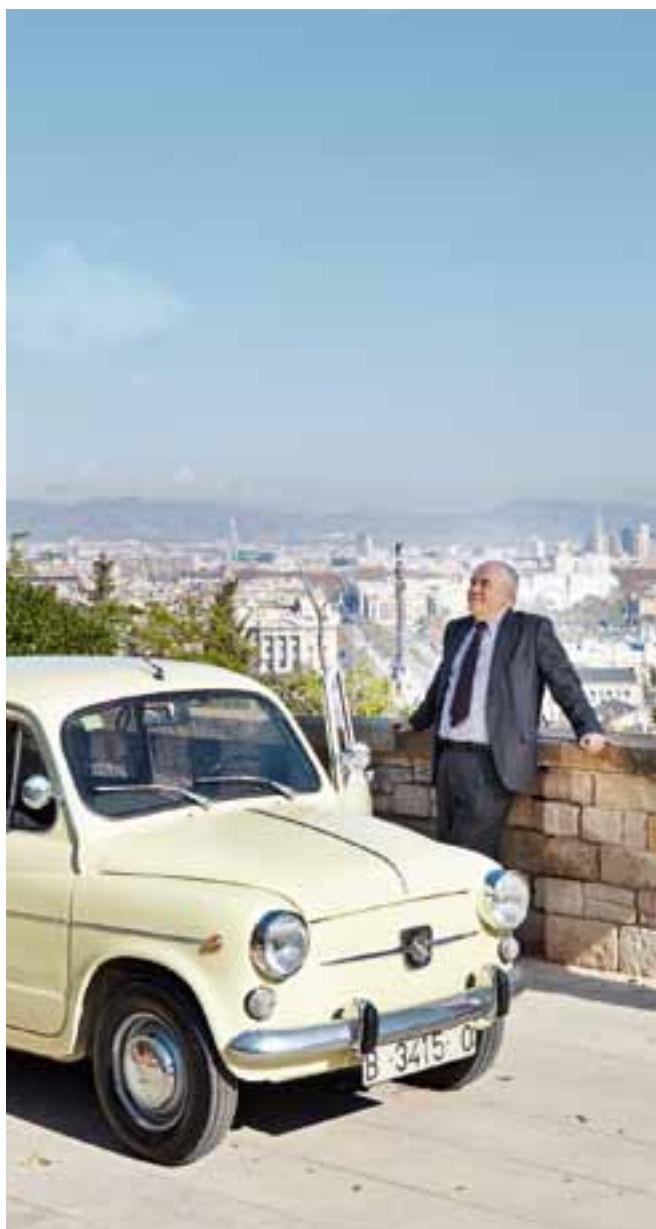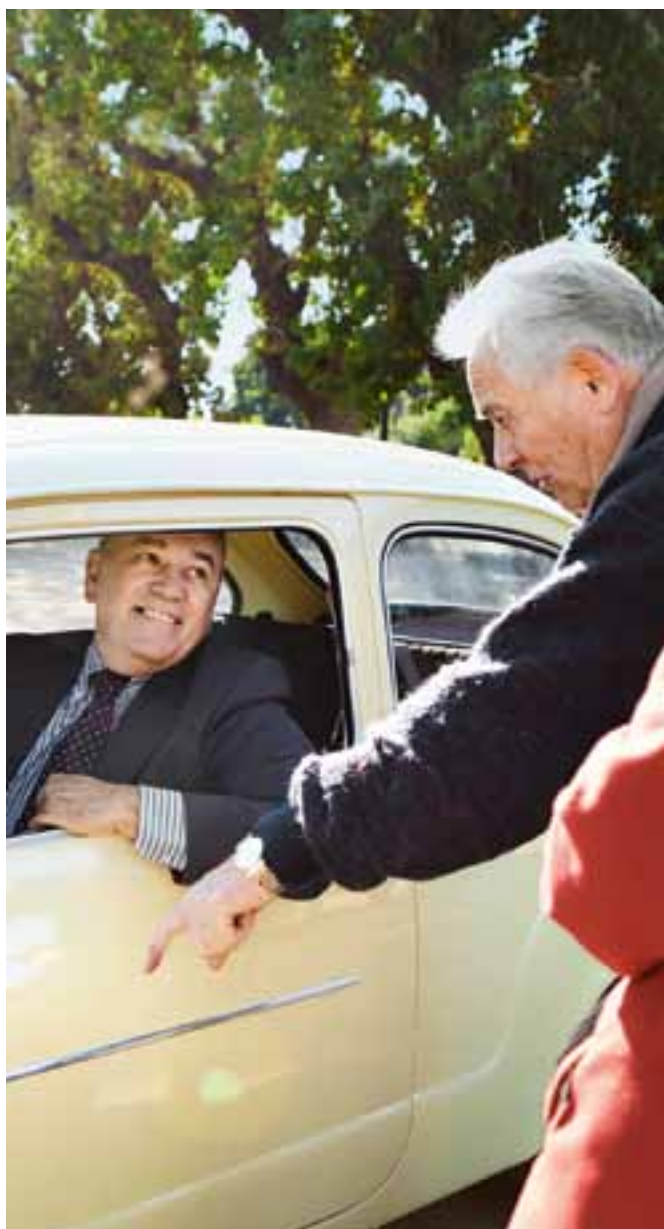

**ZEITGENOSSEN AUF TOUR** – Am Montjuïc gönnt Francisco de Pablo dem SEAT 600 eine Verschnaufpause. Der SEAT 600 mobilisiert Spanien, das kleine Auto ermöglichte Ausflüge mit Familie und Freunden.

von Fahrplänen, auto-mobil eben. „Das Auto ist unverzichtbar für kleine Fluchten aus dem Alltag“, sagt Lamarca. In der City bleibt der Wagen häufig stehen. Vor allem am Wochenende, wenn die beiden durch die traditionellen Viertel bummeln: die schmalen, verwinkelten Gassen im Barri Gòtic entlang, dem gotischen Viertel mit der Kathedrale als Mittelpunkt, oder durch die Barceloneta, das frühere Quartier der Hafenarbeiter. „In diesen Stadtvierteln ist man am besten zu Fuß unterwegs“, rät Lamarca.

Der SEAT 600 parkt inzwischen am Aussichtspunkt Miramar am Montjuïc. Weiter oben steht die Burg, rundherum viel Grün – ein Park, Wald und Barcelonas botanischer Garten. Von Miramar aus sieht man auf die Stadt und den Hafen hinab. In dessen Freihandelszone, der Zona Franca, liegen die älteren Gebäude des SEAT Werkes. Hier fing de Pablo im März 1972 an zu arbeiten. Den Führerschein hatte er schon vier Jahre zuvor gemacht, sogar früher als sein Vater. „Als wir zum ersten Mal mit dem Auto ins Heimatdorf meines Vaters fuhren, bestand er trotzdem darauf, selbst hinter dem Steuer zu sitzen – eine Frage des Stolzes. Nur durch glückliche Fügung blieb der Wagen heil“, erinnert sich de Pablo. 1973 lief der letzte SEAT 600 in Barcelona vom Band. Die Arbeiter verabschiedeten ihn mit dem Spruchband: „Du wurdest als Prinz geboren und stirbst als König.“ Als Volkswagen das Unternehmen 1986 übernahm, ging de Pablo für zwei Jahre nach Deutschland und begleitete dort die Planungen für das neue SEAT Werk in Martorell, das er anschließend mit einweihte: „Eine spannende Zeit – für SEAT der Beginn einer neuen Ära.“

Am Abend trifft der in Ehren gealterte SEAT 600 wieder auf den blutjungen Ibiza – inmitten eines architektonischen Schmuckstücks der Altstadt Barcelonas, dem Plaça Reial. Den „königlichen Platz“ umgibt ein Komplex klassizistischer Bauten, Mitte des 19. Jahrhunderts nach französischem Vorbild erbaut. Palmen spenden Schatten. Abends leuchten Laternen, die der damals noch unbekannte katalanische Architekt Antoni Gaudí entworfen hat. Gaudís Bauwerke – am

bekanntesten ist die nach wie vor unvollendete Kirche Sagrada Família – zählen zu den wichtigsten Sehenswürdigkeiten der Stadt. De Pablo war lange nicht mehr hier. „Früher bin ich oft mit meinem Vater hergekommen, auf der Suche nach Briefmarken und Münzen auf dem Trödelmarkt.“ Heute treffen sich die jungen Leute eher zum Feiern auf dem Plaça Reial. Hier sind die Nächte lang: in den Bogengängen mit zahlreichen Cafés und Kneipen, im „Glaciar“, im „Pipa Club“ oder in der Diskothek, die sich im Keller des Restaurants „Taxidermista“ versteckt. Ein echter Insider-Tipp.

#### VIELFÄLTIG UND TEMPERAMENTVOLL – WIE SEAT

Im letzten Tageslicht neigt sich das Generationentreffen dem Ende zu. „SEAT passt zu Barcelona“, sagt Blanco bei einem Glas Bier, „die Stadt ist genauso modern und stilbewusst wie die Marke.“ „Und Barcelona steht für Vielfalt und Temperament – wie SEAT“, ergänzt Lamarca. Aus Blanco spricht nun der Autofan: „Die spanischen Wurzeln der Marke kommen heute stärker denn je zur Geltung. Auch weil sich in den letzten Jahren die Verarbeitung und Motortechnik konstant weiterentwickelt hat.“ De Pablo hört zu und lächelt. Er hat größtes Verständnis für die Jugend und ihre Meinung. Der 600er ist sein Hobby, seine Leidenschaft. Aber im Alltag fährt auch er einen silberfarbenen Ibiza ST, der reichlich Platz und Fahrspaß bietet.

Auf dem Plaça Reial haben japanische Touristen den knuffigen kleinen Oldtimer entdeckt. Nach dem obligaten Foto am zentralen Brunnen stellen sie sich mehr oder weniger unauffällig neben den 600 und bitten Freunde, ein Bild zu schießen. De Pablo sieht es mit Genugtuung. „Der ist nach wie vor ein Blickfang“, sagt er, „der Ibiza hat ja noch Zeit, zu einem Klassiker zu werden.“

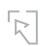

**WEITERE INFORMATIONEN**  
[www.seat.de](http://www.seat.de)

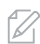

**AUTOR**  
Merten Worthmann



A full-page photograph of a middle-aged man with a shaved head, looking directly at the camera with a serious expression. He is wearing a dark green turtleneck sweater under a grey textured blazer. His hands are in his pockets. The background is a wall made of yellow and black square tiles, creating a checkered pattern.

# Wahrer Luxus.

Luxus – einst Synonym für feinste Waren, edle Materialien und höchste Handwerkskunst – scheint heute Normalität. Beengte Hotelzimmer, schlichte Uhren, herkömmliche Sonnenbrillen – alle täuschen Luxus vor. Grund genug, mit Dirk van Braeckel, Director of Styling and Concept Design bei Bentley, auf die Suche nach wahrem Luxus zu gehen. In der Weltmetropole London – wo sonst?



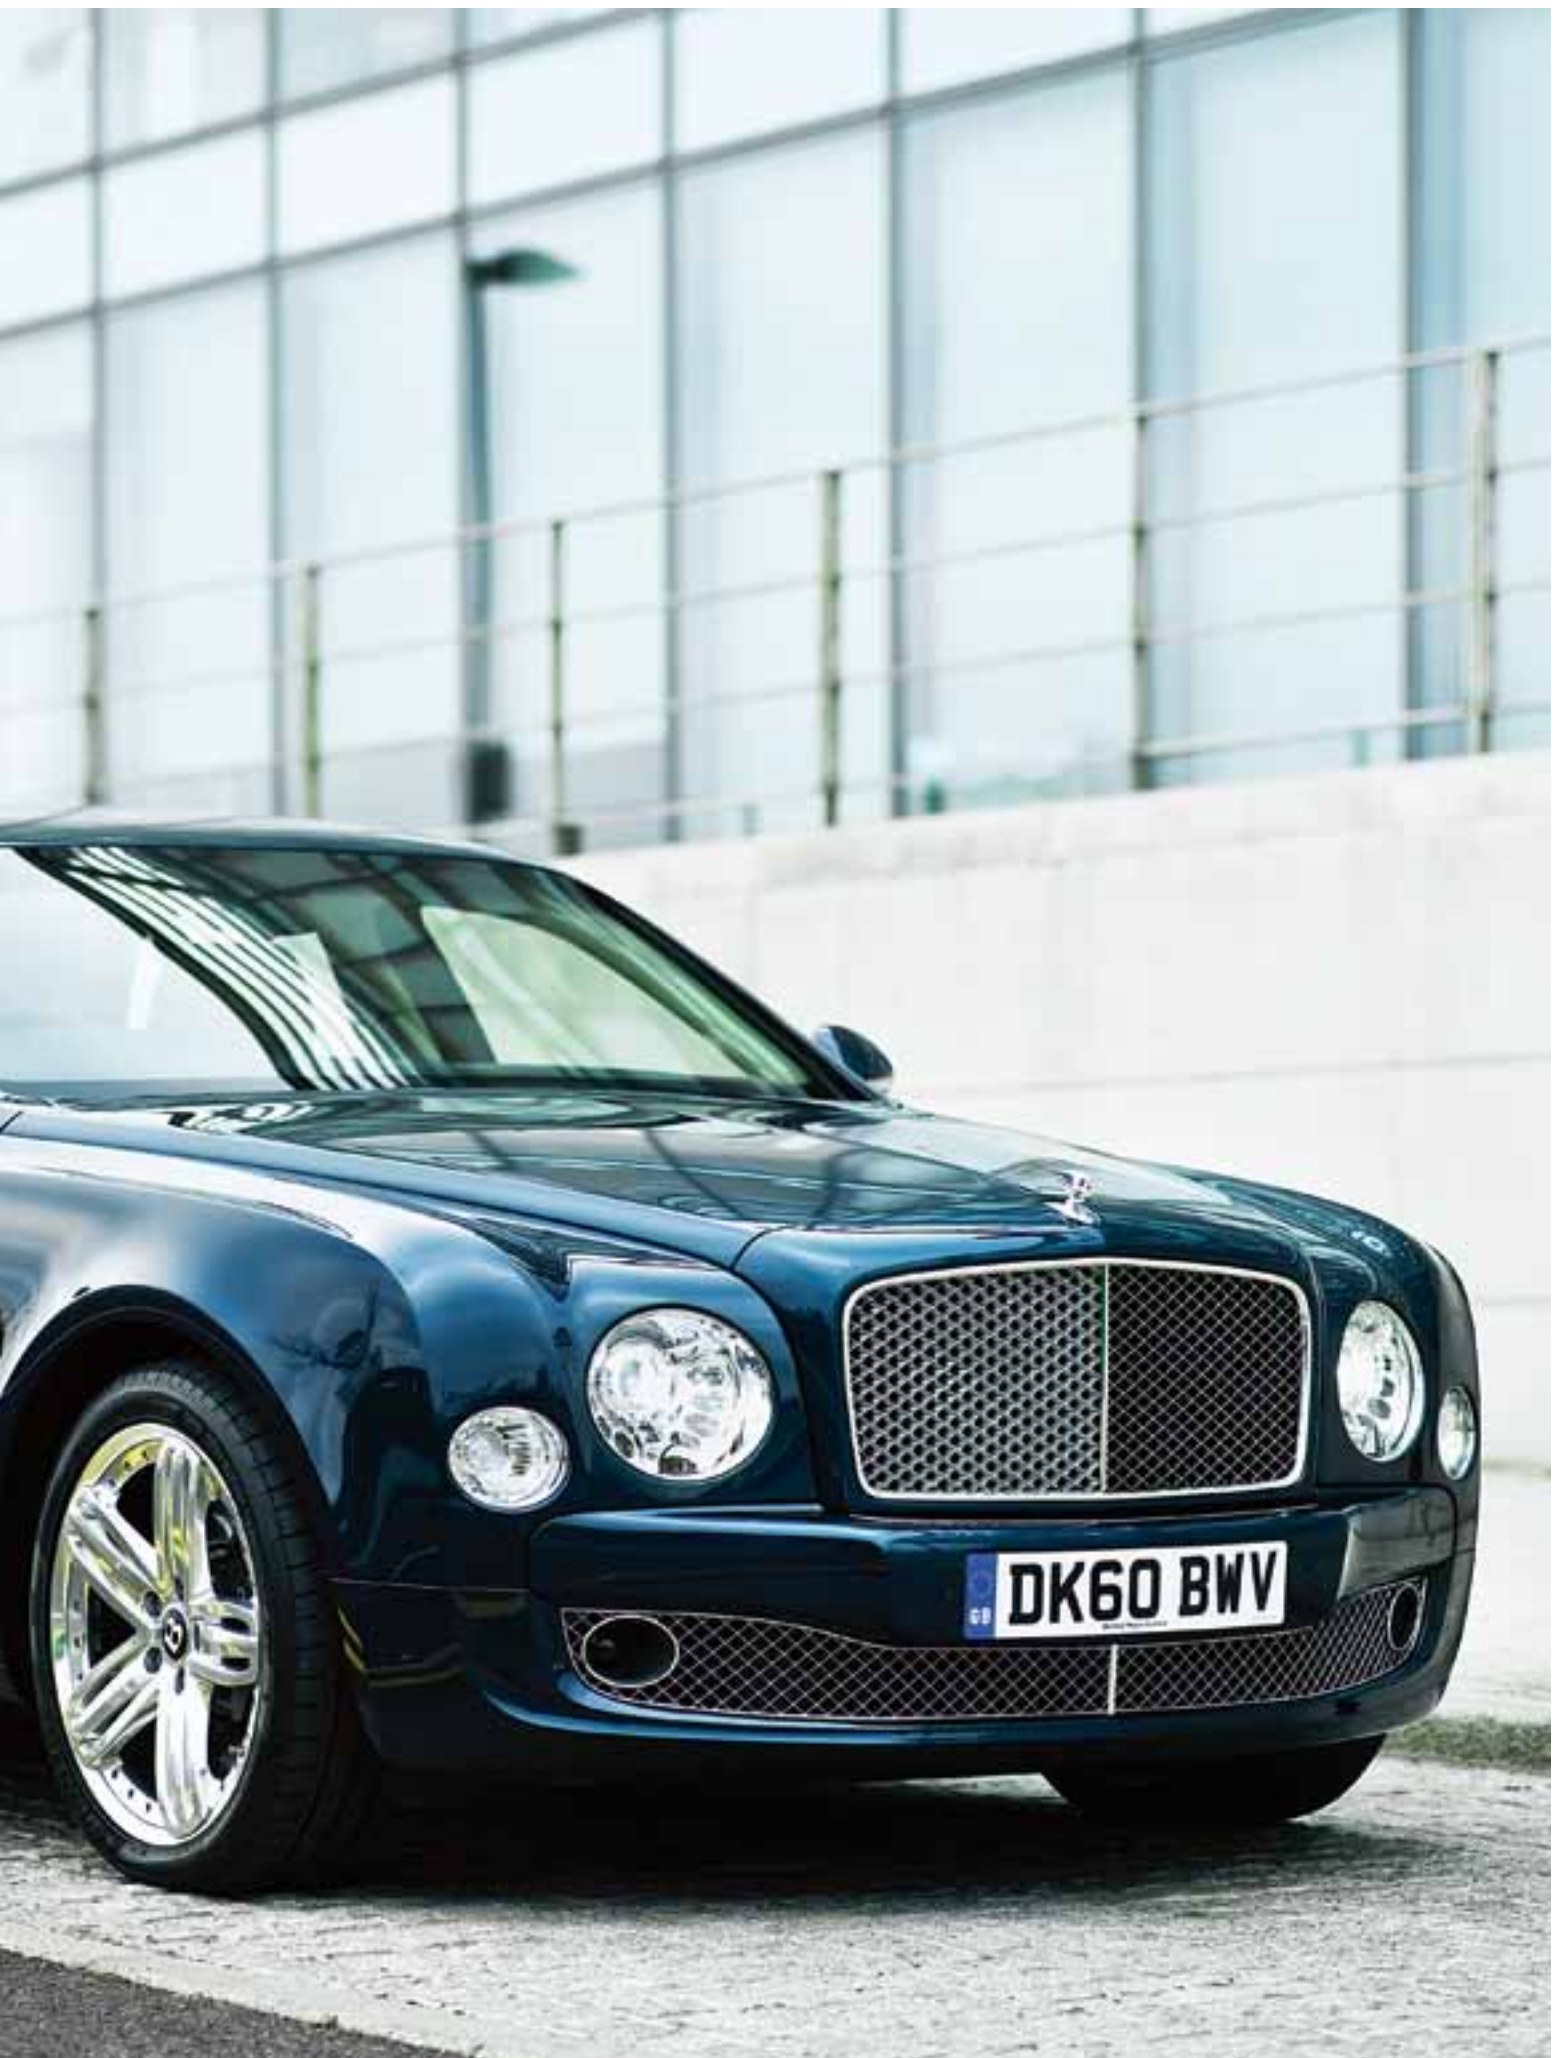

„Mit Salz und Pfeffer?“ Drei Prozent aller weltweit konsumierten Gemüsesäfte werden in der Luft ausgeschenkt, insgesamt 1,2 Millionen Liter. Nichts scheint den Luxus einer Flugreise so sehr zu symbolisieren wie der Tomatensaft – obwohl Fliegen zur Allerweltssache geworden ist.

#### TRADITION, BEHUTSAM MODERNISIERT

„Luxus, das sind für mich Dinge jenseits des Alltäglichen, die man sich leisten kann oder möchte“, erklärt der 52-jährige Belgier Dirk van Braeckel. „Und genau das schätzen die Kunden an Bentley. Wir stehen für einen Luxus, der fest in Altbewährtem verwurzelt ist. Dass wir traditionelle Werte erkennen, pflegen und behutsam modernisieren, macht die Faszination dieser Marke aus.“

An welchen Orten man wahren Luxus erfahren kann, will van Braeckel heute in London demonstrieren. Auf dem Weg zum Mulsanne, der in der Tiefgarage am City Air Terminal parkt, erläutert der Designer lakonisch: „Luxusprodukte braucht eigentlich niemand, aber jeder begehrt sie. Also muss ich die Leute dazu verführen, ihrem Begehren nachzugeben. Ja, wenn man so will, arbeite ich bei Bentley als Verführer.“

Sobald die Türen des Mulsanne ins Schloss fallen, bleibt das hektische und laute Treiben der Welt draußen. Ein Kokon. Komfort für Connaissseure.

#### DAS „RAUMSCHIFF“, DAS ÜBERZEUGT

Der Weg ins Stadtzentrum wird zum Ziel, das katzenhafte Schnurren des Motors zur Begleitmusik für leise, fast vorsichtige Gespräche. Bis sich die Tür des Wagens vor dem Hotel „One Aldwych“ wieder öffnet. Kurzfristig dringt lärmendes Dröhnen ins Ohr. Doch bald schließt sich die Eingangstür des Hotels hinter uns, ein weiterer Luxus-Kokon umschließt die Gäste des Hauses. Der Mann aus dem Dorf Deinze nahe Gent nimmt das unterbrochene Gespräch wieder auf: „Als ich im Sommer 1999 mit meinem ersten Projekt, dem Continental GT, angefangen habe, wollte ich etwas wagen. Ich wollte einen großen Schritt machen und ein modernes Auto bauen, das aber sofort als Bentley erkennbar sein sollte. Auf manche wirkte das, was ich schließlich vorgestellt habe, wie ein Raumschiff. Aber das Auto hat es geschafft, als echter Bentley zu überzeugen – erst den Vorstand und dann vor allem die Kunden. Heute, zehn Jahre später, ist der Continental GT das bei Weitem erfolgreichste Modell. Es war richtig, die Tradition der Marke zu modernisieren.“

#### VERFÜHRER IM DIENSTE BENTLEYS –

Chefdesigner Dirk van Braeckel setzt auf die Symbiose von Tradition und Modernität.

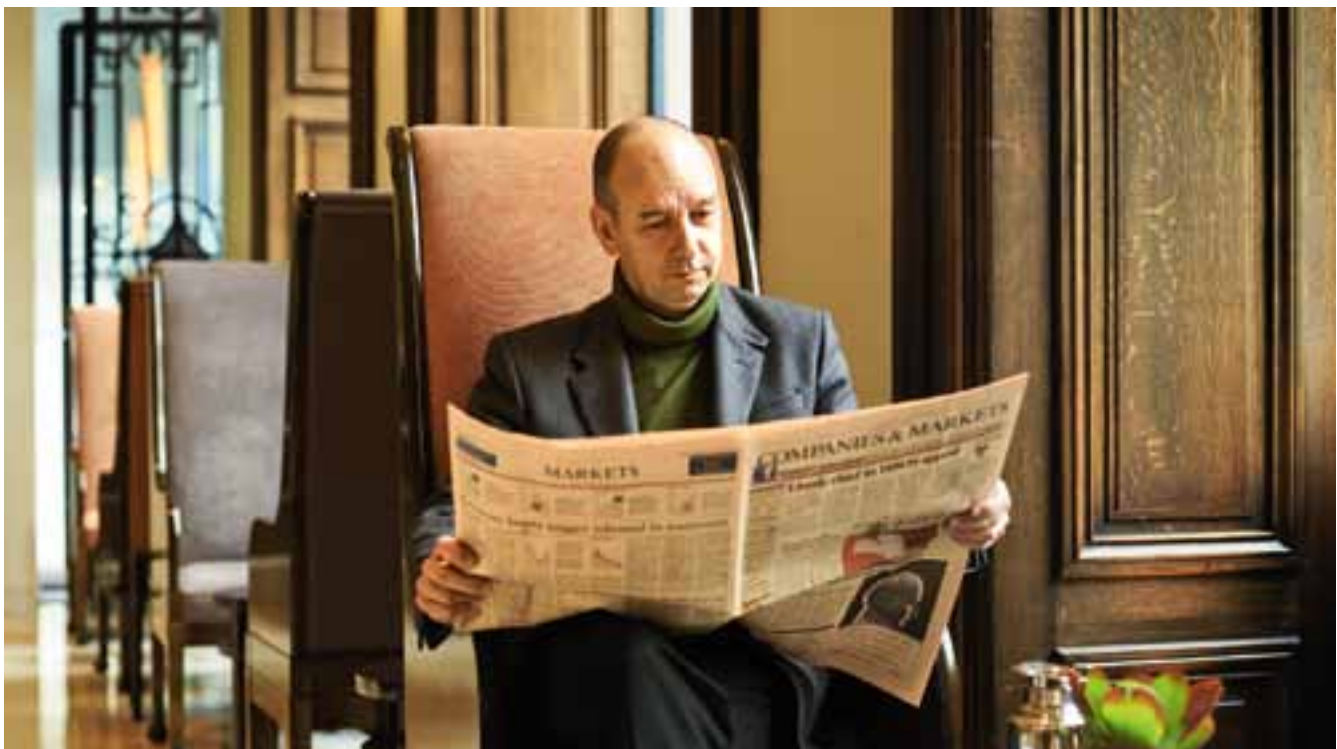



---

„Luxus, das sind für mich Dinge jenseits des Alltäglichen, die man sich leisten kann oder möchte.“

---

DIRK VAN BRAECKEL, DIRECTOR OF STYLING AND CONCEPT DESIGN BEI BENTLEY

---

Das Gleiche gilt auch für das „One Aldwych“. Fortschrittlich in technischen Belangen, individuell bis ins Detail, ausgewogen in einem Stil, in dem sich Moderne und Geschichte gekonnt mischen. Aber, Gott behüte, kein Hotel, das dem Designer huldigt, sondern dem Gast. Wie bei Bentley: Trotz Modernität sind traditionelle Werte hier klar erkennbar.

#### STILSICHER MODERN

Der Mulsanne belegt, wie stilsicher die Moderne ins Auto-design einziehen kann. Aber ohne Gimmicks, ohne Gadgets – anders als es manche Luxusmarken versucht haben oder noch

versuchen. Bei Bentley steht stattdessen die Verbindung von Exklusivität und höchster Qualität mit automobiler Spitzentechnologie im Mittelpunkt. Und Perfektion braucht Zeit: Mehr als 400 Stunden Handarbeit fließen in die Fertigung eines Bentley, in dem jedes Detail – bis hin zu den über 120 möglichen Außenfarben – auf die Wünsche seines zukünftigen Besitzers abgestimmt ist.

Dieses Prinzip verfolgt auch das „Bourdon House“ im Londoner Stadtteil Mayfair. Hier, im ehemaligen Stadthaus des Duke of Westminster, residiert Dunhill. Tradition ist an diesem Ort

**PERFEKTION UND EXKLUSIVITÄT** – 400 bis 500 Stunden Handarbeit fließen in die Fertigung eines Bentley. Handwerkliche Perfektion zeichnet auch die Maßkonfektion bei Dunhill im „Bourdon House“ in Mayfair aus.

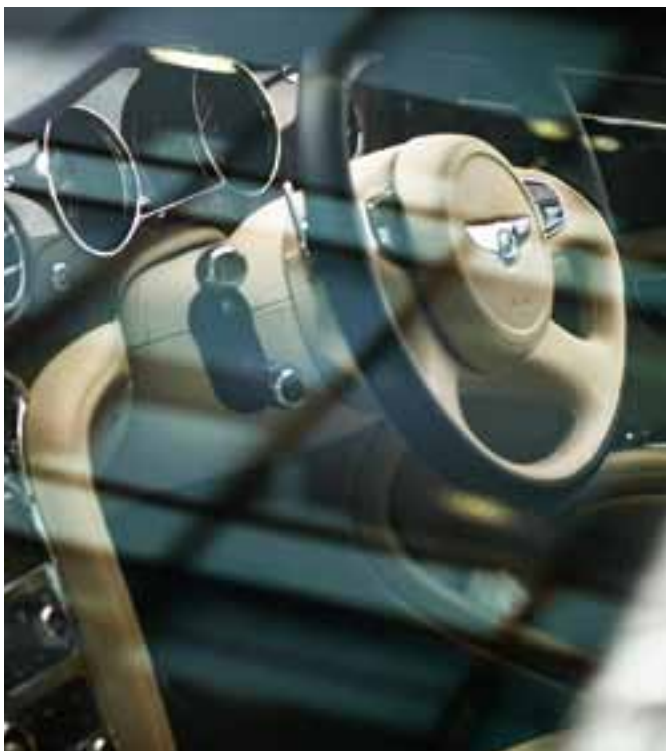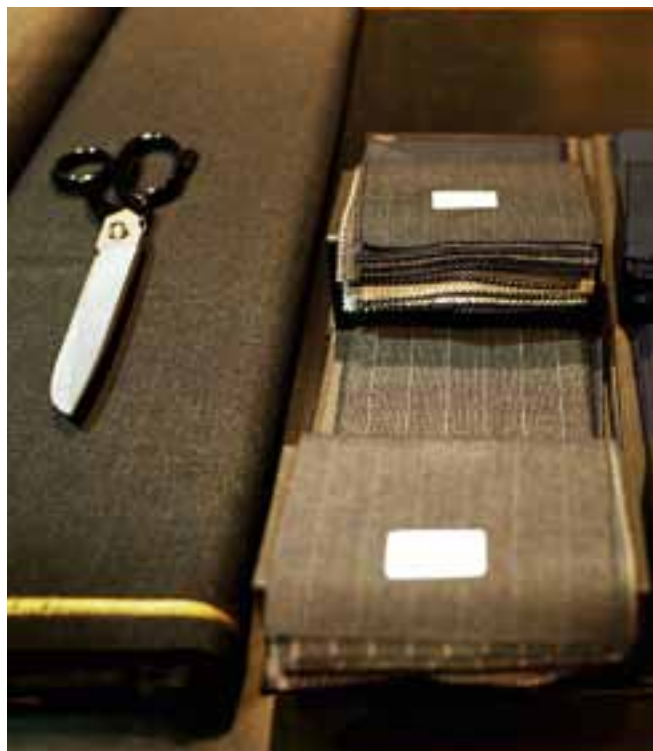

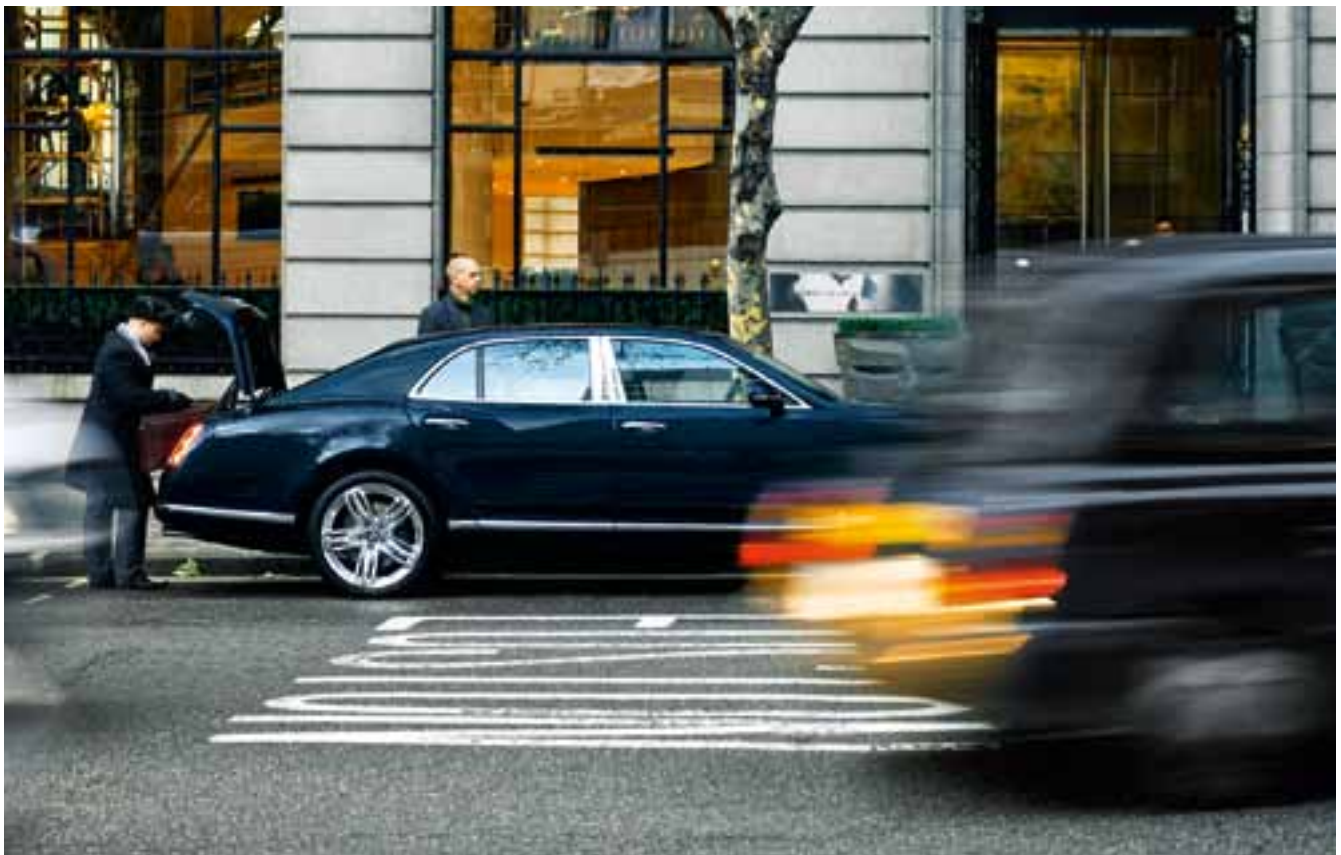

„Bentley baut Automobile, wie es sonst niemand tut –  
absolut unverwechselbar.“

---

DIRK VAN BRAECKEL

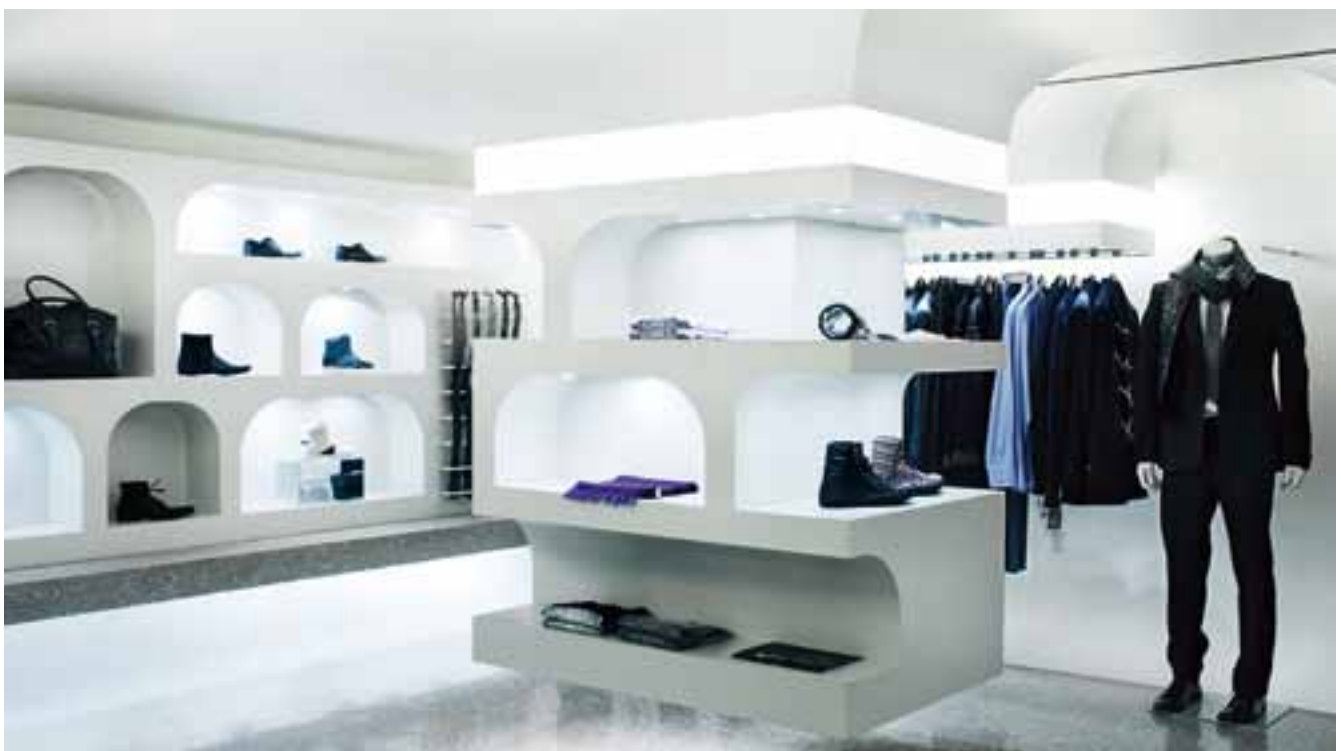

**CHILL-OUT IM VERTIGO 42 –**  
Der Bentley Chefdesigner freut sich  
auf Zeit mit seiner Familie: „Luxus.“

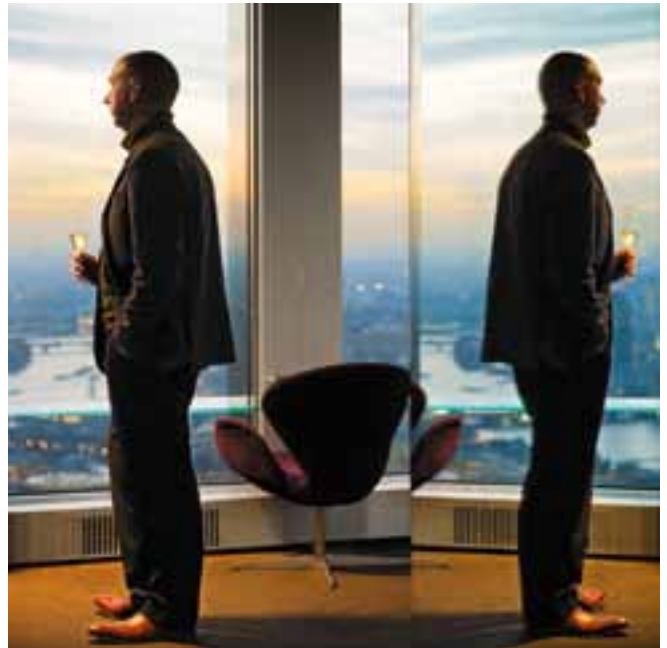

Pflicht, an dem Zigarren-Aficionados besondere Exemplare ausgefallener Marken in einem begehbaren Keller-Humidor lagern. Als Erbstücke. Daneben ein Kino mit einer Soundanlage des Edelherstellers Meridian, deren Akustik glauben machen könnte, man sei in der Royal Albert Hall. Im Erdgeschoss die exklusive und aus feinsten Materialien zusammengestellte Herrenkollektion: Füllfederhalter, Schuhwerk und Gepäckstücke, die in Hunderten Stunden Handarbeit entstanden sind.

Aber eben auch die erste und wohl weltweit einzige „biometrische Geldbörse“, die ihren Inhalt nur via Fingerabdruck preisgibt. All diesen Preziosen, so der Designer, „ist ihr Streben nach Perfektion gemein: vom ersten Eindruck bis ins letzte Detail. Das Endergebnis ist eine umwerfende Ausstrahlung, bei der man nur ‚Wow‘ sagen kann. Das ist Emotion pur.“

Emotionen weckt auch ein Besuch im Alexander McQueen Shop. McQueen, einst Enfant terrible der Modeszene und doch einer ihrer begnadetsten Designer, starb im Januar 2010. Seine Entwürfe waren einzigartig, stachen durch ihre Individualität und Unangepasstheit hervor. Motive, denen auch van Braeckel folgt: „Bentley baut Automobile, wie es sonst niemand tut – absolut unverwechselbar.“ Und das gelingt heute überzeugender als je zuvor. Denn, und da ist sich der Automobil-Ästhet sicher, die Zugehörigkeit zum Volkswagen Konzern habe auf die englische Traditionsmarke wie ein Jungbrunnen gewirkt: „Bentley hat sich wieder auf seine ureigenen Markenwerte besonnen und sie in die Zukunft übertragen.“ Ausstrahlung, Präsenz und Individualität wurden mit „viel Herzblut und noch mehr Ausdauer“ perfektioniert. Heute stehe Bentley für zeitgemäßen Luxus. Oder, wie es van Braeckel zusammenfasst: „Bentley, das sind automobile Emotionen ‚made in England‘.“

Wieder schließen sich die Türen des Mulsanne. Wieder bleibt die Hektik draußen. Wieder hat man das Gefühl, in einem edlen Wohnzimmer unterwegs zu sein. Und das, obwohl ein 6,75-Liter-V8-Motor den Mulsanne durch den Londoner Stadtverkehr treibt. Auch Sportlichkeit ist ein originäres Markenattribut, das Bentley wiederbelebt hat. „Im Jahr 2002 haben wir eine Limousine an die Queen ausgeliefert – und ein Jahr später Le Mans gewonnen“, schwärmt van Braeckel. „Welche andere Marke schafft so etwas innerhalb von zwölf Monaten?“

#### AM ENDE DES TAGES: GENUSS

Keine zwölf Monate, sondern knapp zwölf Stunden nach dem Start der Tour durch London sitzt van Braeckel im Vertigo 42. Zum Chill-out, wenn man so will. Hier oben, genau 42 Stockwerke über dem lebhaften Treiben in den Straßen, kann der Designer abschalten. Er lässt den Blick über die Stadt schweifen, die wie keine andere Moderne und Tradition vereint. In glühenden Farben versinkt die Megapolis in einen winterlichen Abend. Und aus tiefer Seele kommt der Satz: „Ich glaube, für mich bedeutet Luxus auch, Zeit mit der Familie verbringen zu können. Und hin und wieder einen guten Tropfen zu genießen.“

Aber bitte nicht mit Salz und Pfeffer. Sondern mit fein perlenden Bläschen, versteht sich.

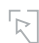

**WEITERE INFORMATIONEN**  
[www.bentleymotors.com](http://www.bentleymotors.com)

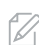

**AUTOR**  
Jo Clahsen



# Einer für alle Wege.

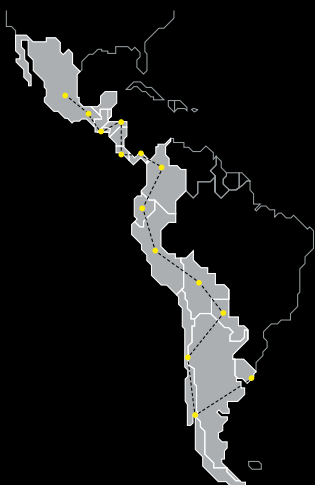

## AMAROK CHALLENGE: ÜBER STOCK UND STEIN ZU DEN KUNDEN

Mensch und Maschine auf Extrem-Tour über knapp 20.000 Kilometer: dünne Höhenluft auf 5.100 Metern in den argentinischen Anden, Backofentemperaturen in der Vulkanwüste Atacama in Chile, Saunabedingungen im subtropischen Dschungel Boliviens und Paraguays. Ihr Weg führte sie durch die Pampa del Infierno, der „Höllen-Pampa“ in Argentinien, vorbei an den Ruinen der Inkas und entlang des Pazifiks auf dem Panamericana Highway in Peru. Die drei Volkswagen Amarok bewältigten jede Unwegsbarkeit: Wasser, Sand, Schotter, Matsch und gefühlte Millionen von Schlaglöchern. Sie meisterten insgesamt neun Anden-Überquerungen und schwierigste Bedingungen auf Wegen und Straßen, die diese Bezeichnungen beileibe nicht immer verdienten. Alles ohne auch nur eine Panne. Nicht einmal ein platter Reifen stoppte ihr Vorankommen.



Von Patagonien im äußersten Süden des amerikanischen Doppelkontinents bis ins mexikanische Puebla – exakt 19.220 Kilometer durch 15 Länder in zwölf Wochen. Auf der „Amarok Challenge“ zeigte der neue Pickup von Volkswagen, was in ihm steckt: alle Tugenden eines Eroberers.

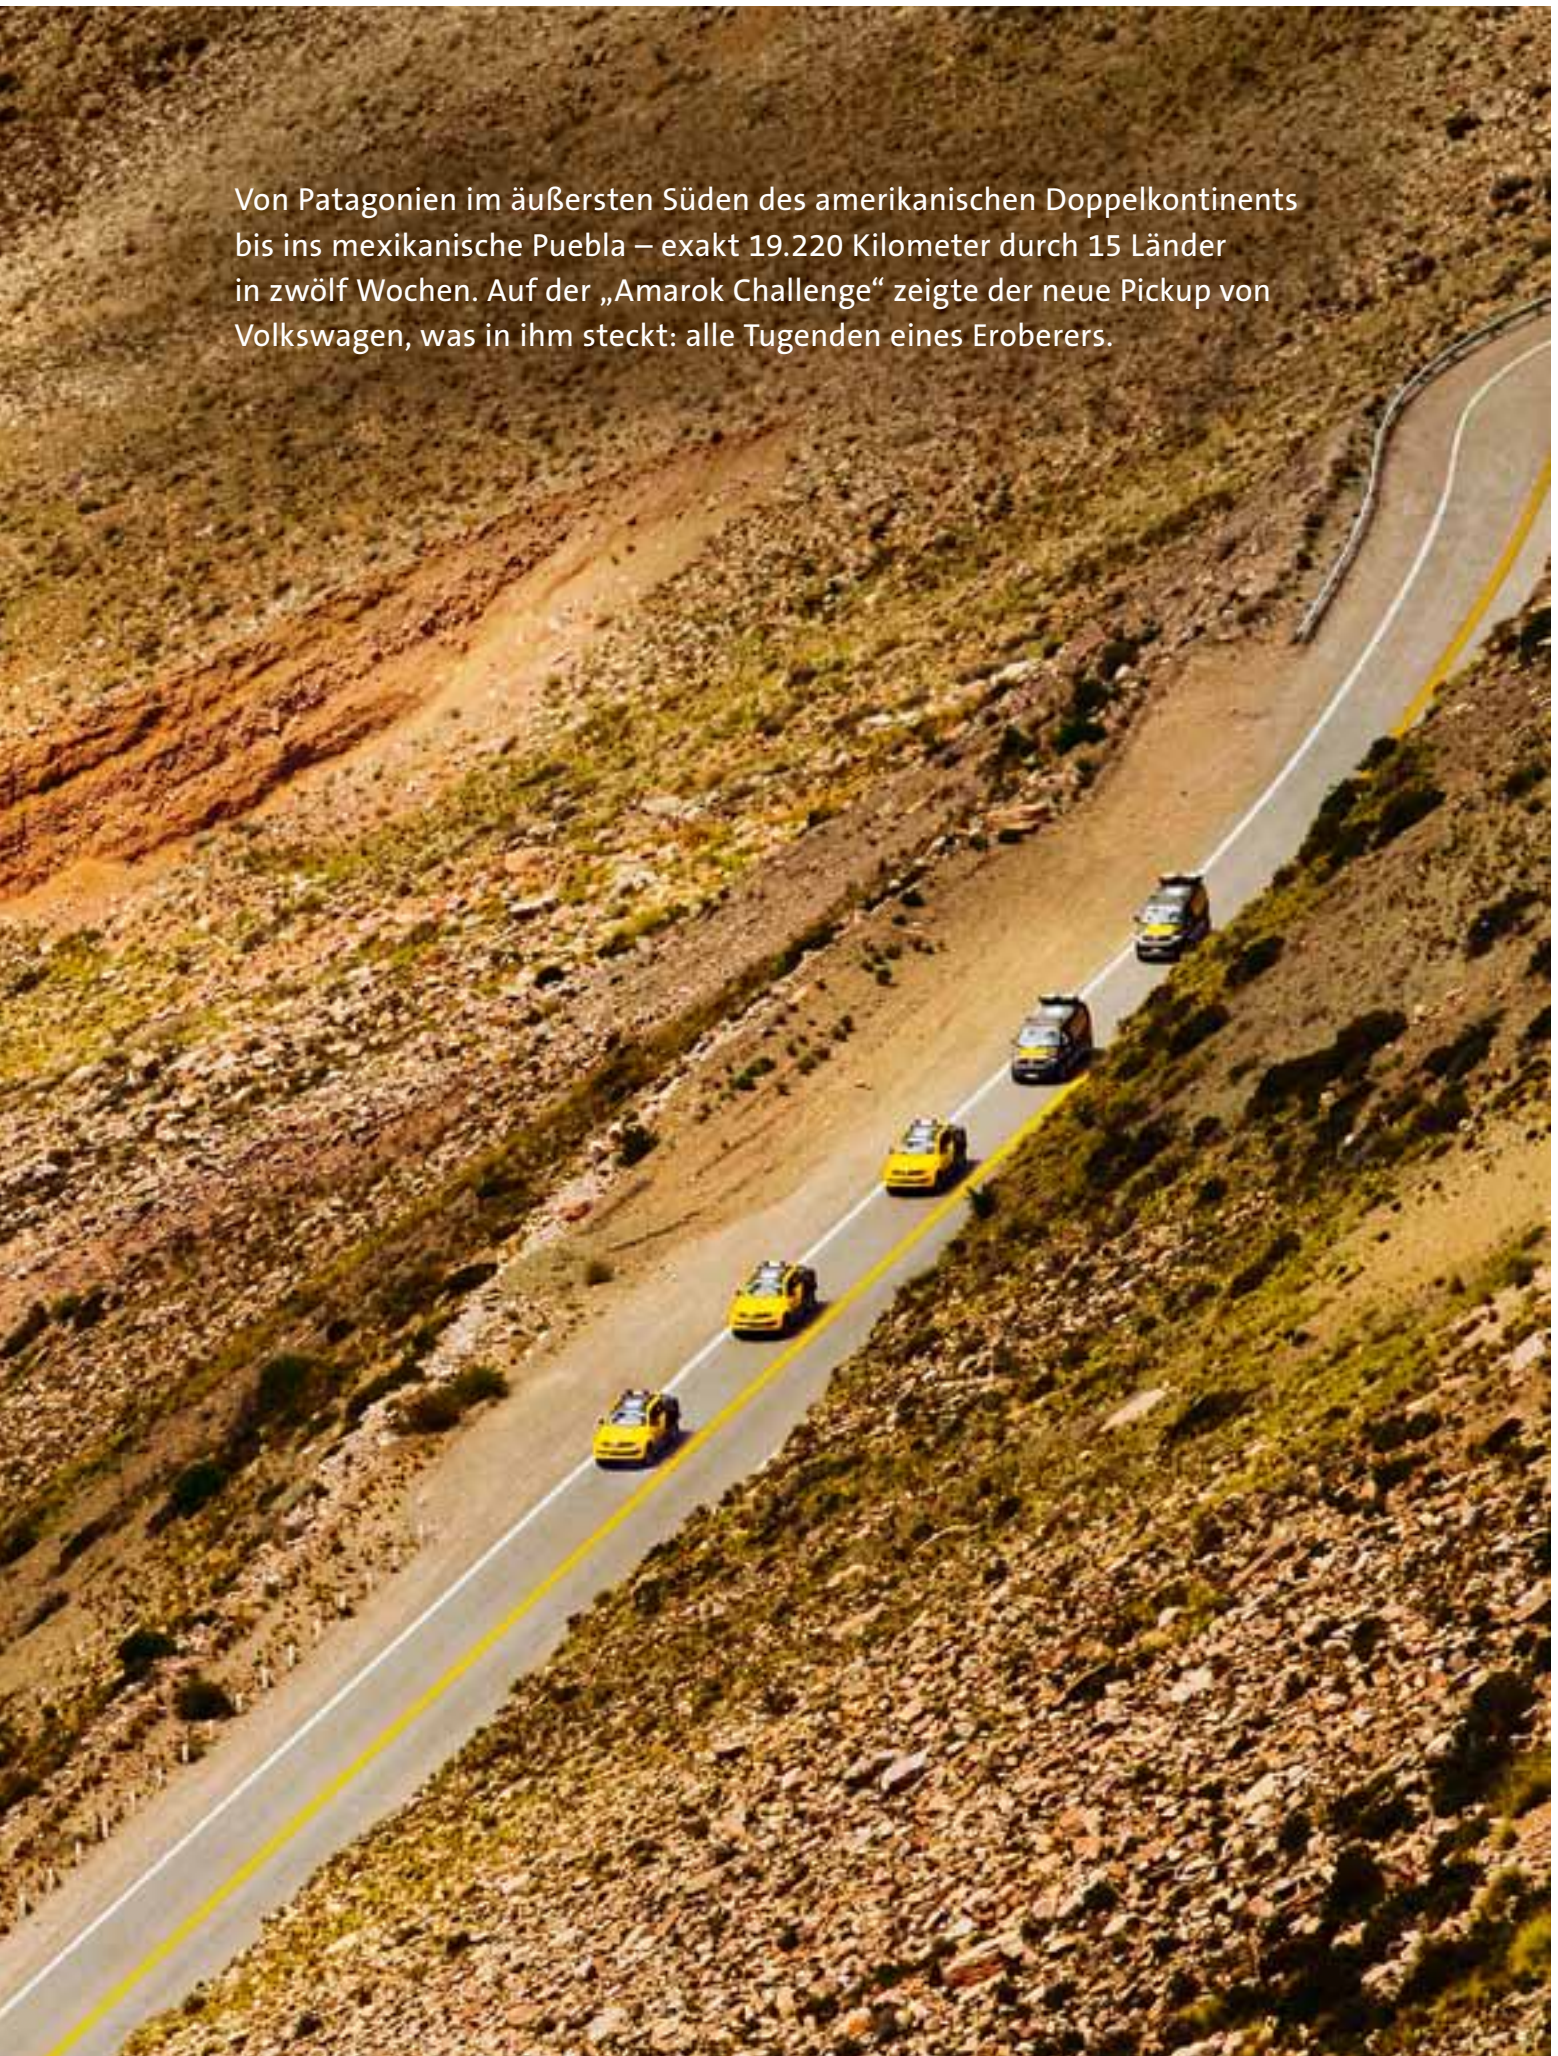



Felipe Aja Espil, Projektleiter und Teamchef der Amarok Challenge, kommt ins Schwärmen, wenn er von den Menschen und den vielfältigen Begegnungen auf der Tour durch Südamerika erzählt. Zum Beispiel von den Plattdeutsch sprechenden Mennoniten in Filadelfia, Paraguay: 300 Anhänger der Glaubensgemeinschaft kamen zum dortigen Bürgerzentrum, um die Autos zu begutachten. Oder von den fußballverrückten Bolivianern, die das Team nach fast 1.000 zermürbenden Kilometern über Schotterpisten spontan zum Kicken einluden. Mit einem Volksfest feierte die Stadt Chiclayo im Norden Perus die Ankunft der Amarok. In Kolumbien notierte der Schreiber des Online-Tagebuchs: „Überall Salsa und tolle Stimmung.“ Wo die Amaroks auftauchten, kamen die Menschen zusam-

renz. Doch der 5,25 Meter lange Newcomer punktet mit Kraft, Vielseitigkeit und Volkswagen typischer Qualität. Bei Sicherheit und Fahrkomfort verschaffen sparsame Antriebe, das elektronische Stabilitätsprogramm ESP und die Antischlupfregelung ASR dem Volkswagen Pickup den entscheidenden Technikvorsprung. Die zweite Amarok-Fertigung startet Mitte 2012 mit einer Jahreskapazität von 40.000 Fahrzeugen im Stammwerk Hannover von Volkswagen Nutzfahrzeuge. Zunächst steht jedoch Südamerika im Fokus.

Doch wie erobert man eigentlich einen Kontinent? Wie bringt man Händlern und Kunden, die verstreut von der Südspitze Südamerikas bis rund um den Golf von Mexiko leben, ein neues

## „Der beste Botschafter für den Amarok kann nur einer sein – der Amarok selbst.“ VOLKMAR STEINHORST

men. So mancher wollte den neuen Pickup von Volkswagen vom Fleck weg kaufen. „Sehr beeindruckend“, würdigte der paraguayische Parlamentssprecher den Amarok; er hatte es sich nicht nehmen lassen, das Auto höchstpersönlich in Augenschein zu nehmen.

### OFFENSIVE IM WACHSTUMSMARKT LATEINAMERIKA

Am 12. März 2010 war das Team mit drei Amarok und zwei Volkswagen Multivan als Begleitung in Bariloche am Fuße der Anden-Kette in Argentinien gestartet. Vor ihnen lag eine Tour, die zu 60 Volkswagen Händlern in 47 Städten Latein- und Mittelamerikas führte – und die den Startschuss für die Markteinführung des Amarok gab. Fast 20.000 Kilometer legten sie zurück, zwei Mal die Strecke von Wolfsburg nach Mexiko. Nach 87 Tagen, am 6. Juni 2010, erreichte der Fahrzeugtross das Volkswagen Werk Puebla in Mexiko.

Mit dem Amarok als vierte Baureihe beschleunigt Volkswagen Nutzfahrzeuge seinen Wachstumskurs. „So ein Auto hat uns lange im Portfolio gefehlt; der Amarok öffnet uns die Tore zu neuen Märkten“, sagt Dr. Wolfgang Schreiber, Sprecher des Vorstands von Volkswagen Nutzfahrzeuge. Volkswagen ist heute der größte Autobauer in Südamerika, einem der wichtigsten Wachstumsmärkte. In Brasilien und Mexiko ist Volkswagen sogar die Nummer eins. Nun verstärkt Volkswagen Nutzfahrzeuge mit dem Amarok die Offensive in dem riesigen Erdteil. Denn Südamerika ist eine Pickup-Region par excellence: „Die Nachfrage übertrifft unsere Erwartungen bei Weitem. Die Auftragseingänge stiegen im Laufe der Amarok Challenge immer weiter an“, sagt Fernando Badia, Leiter des Lateinamerika Büros bei Volkswagen Nutzfahrzeuge.

Der im argentinischen Volkswagen Werk Pacheco nahe Buenos Aires gebaute Amarok trifft in Südamerika auf harte Konkur-

renz. Und zwar so nahe, dass sie es anfassen, sich hineinsetzen, es spüren können? Für Volkmars Steinhorst, Regionalleiter für Mittel- und Südamerika bei Volkswagen Nutzfahrzeuge, gab es nur einen Weg: „Der beste Botschafter für den Amarok kann nur einer sein – der Amarok selbst.“

Zwei Jahre lang plante das Lateinamerika-Büro unter Leitung von Fernando Badia die Fahrt. An jeder Station stellte das Team die Fahrzeuge vor: beim Händler, in Pressekonferenzen mit lokalen Journalisten und in zahllosen Gesprächen mit Interessenten und Kunden. Tageszeitungen, Automagazine, Radio- und lokale TV-Sender berichteten über die Amarok Challenge. Auf große Resonanz stieß die „rollende Markteinführung“ auch im Internet: Die Website mit Tagebuch und Fotoimpressionen besuchten während der Tour knapp 60.000 Nutzer.

### „ROLLENDE“ MARKTEINFÜHRUNG

Der neue Amarok hat bewiesen, dass er ein Arbeitstier ist: zuverlässig, robust, stark. Sein Styling und das Image der Marke verschaffen dem Pickup aber auch imposante Auftritte auf urbanem Asphalt. Weil er auf City-Boulevards und Strandpromenaden, etwa denen am Panamericana Highway entlang der Pazifikküste im Norden Perus, eine ebenso gute Figur macht. „Einer der schönsten Flecken dieser Erde“, Espil hat diese Etappe noch genau vor Augen. Ja, er würde jederzeit wieder losfahren. Aber nur mit einem Amarok. „Es gibt kein Auto, das eine solche Tour besser bewältigen könnte.“

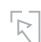

#### WEITERE INFORMATIONEN

[www.volkswagen-nutzfahrzeuge.de](http://www.volkswagen-nutzfahrzeuge.de) > Der Amarok

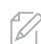

#### AUTORIN

Tina Rumpelt



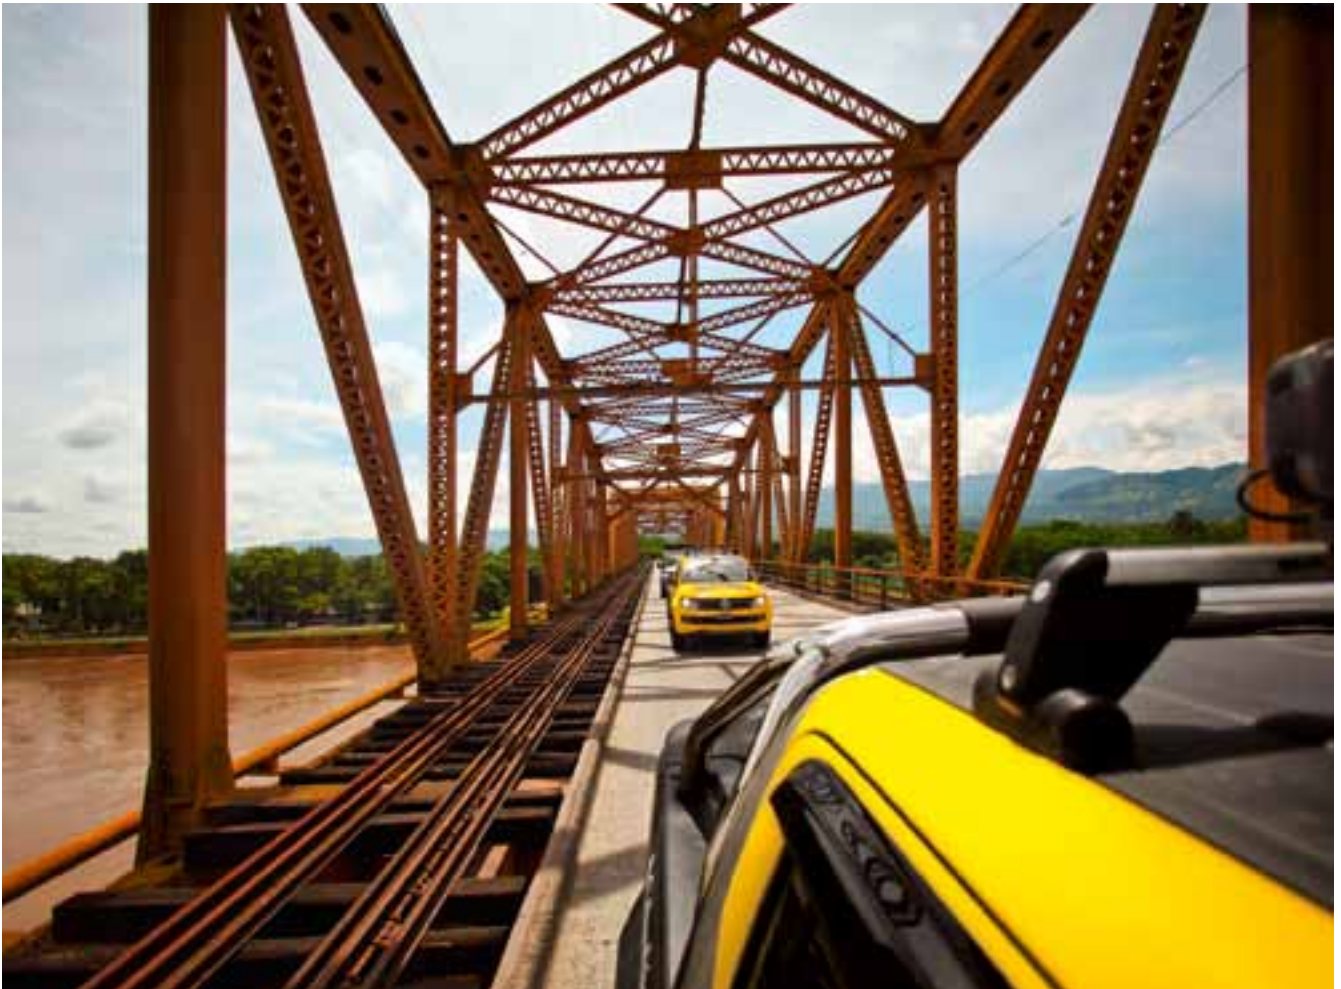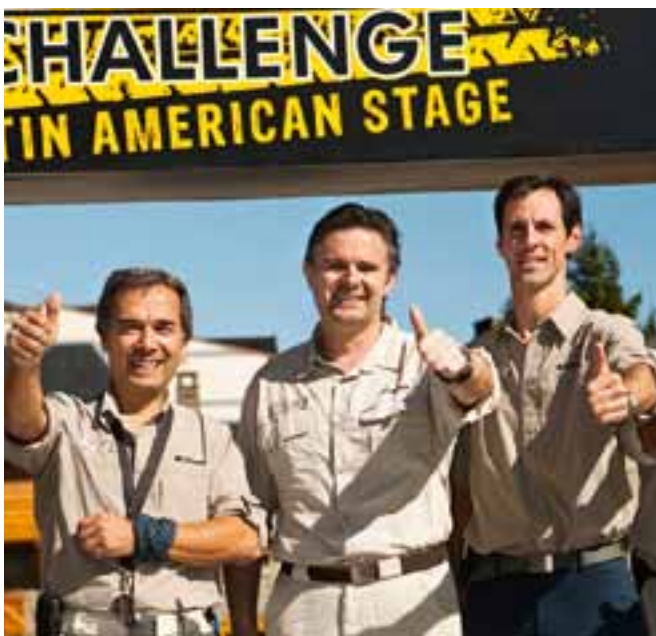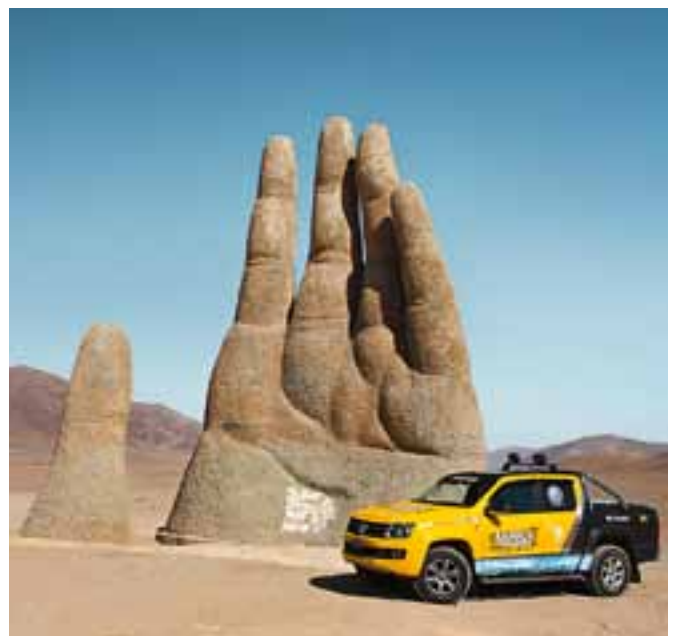

**AUTOMOBILE „TORT(O)UR“** – Die Amarok stellen unter Beweis, auf was es in Südamerika ankommt: Zuverlässigkeit, Robustheit, Kraft. Felipe Aja Espil, Volkmar Steinhorst und Fernando Badia (v.l. n. r.) organisierten die Amarok Challenge.

A close-up, low-angle shot of a car's front end. The image shows the curved, ribbed structure of the grille and the smooth, white surface of the headlight. The lighting is soft and diffused, creating a clean, modern aesthetic. The text "Fein abgestimmt." is overlaid in the lower right corner.

Fein  
abgestimmt.



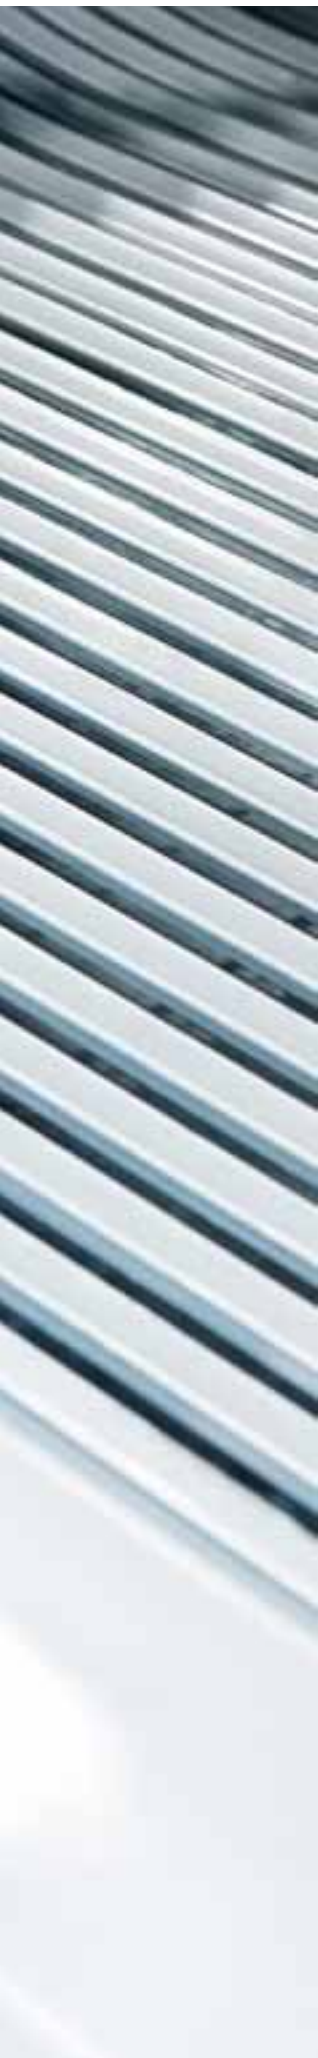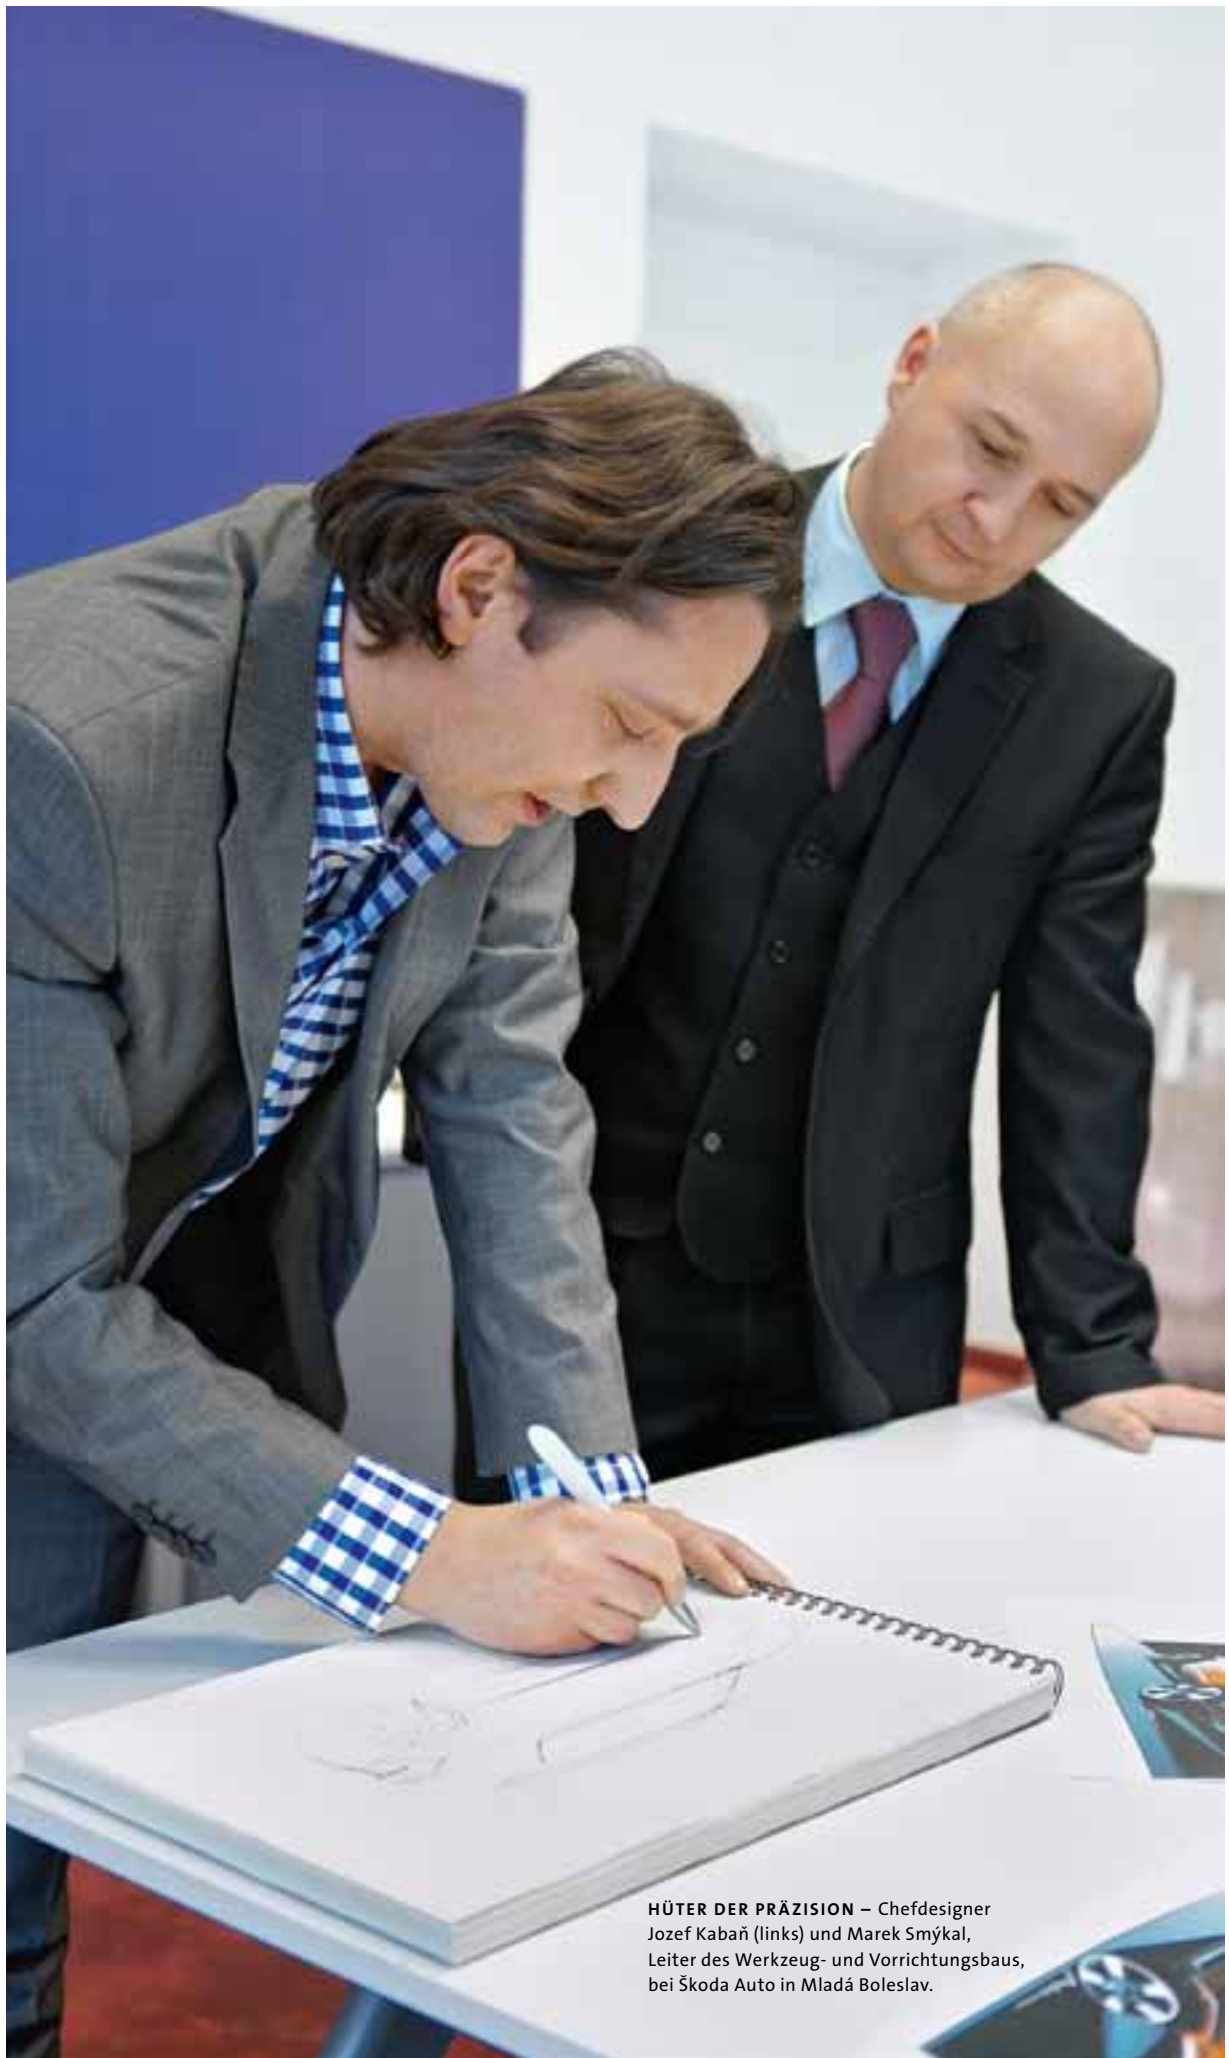

**HÜTER DER PRÄZISION** – Chefdesigner Jozef Kabaň (links) und Marek Smýkal, Leiter des Werkzeug- und Vorrichtungsbaus, bei Škoda Auto in Mladá Boleslav.

Es sind Nuancen, die darüber entscheiden, ob ein Auto wirklich perfekt auftritt. Jozef Kabaň, Chefdesigner der Marke Škoda, teilt sein Streben nach Perfektion und Präzision mit seinem Kollegen Marek Smýkal, Leiter des Werkzeug- und Vorrichtungsbau. Beide sind Meister darin, Details aufeinander abzustimmen.

„Meinen Kollegen sage ich immer: Das, was wir machen, machen wir perfekt“, erklärt der 38-jährige Designer Jozef Kabaň in der Werkhalle von Škoda Auto in Mladá Boleslav. Die 1.050 Mitarbeiter des Werkzeug- und Vorrichtungsbau entwickeln und fertigen hier Bauteile für die gesamte Škoda Produktpalette. In diesem Gebäude werden Ideen Wirklichkeit – unter dem Taktstock von Marek Smýkal, der seinen Designerkollegen heute durch die Maschinenwelt begleitet. „Das hier ist das Presswerkzeug für ein Außenblech der Seitentür eines Fabia“, erläutert Werkzeugfachmann Smýkal, während der Chefdesigner das Bauteil genau unter die Lupe nimmt und die Metallformen mit den Fingerspitzen nachfährt.

In der gigantischen Halle entstehen nicht nur die Presswerkzeuge und mit ihnen die Basis für die Karosserien, sondern auch Formen für die Herstellung von Motorblöcken oder Kupplungsgehäusen. Außerdem konstruieren die tschechischen Fachleute hier ganze Fertigungsanlagen, beispielsweise hochautomatisierte Schweißlinien für den Karosseriebau.

So unterschiedlich die Arbeitsbereiche Design und Werkzeugbau auf den ersten Blick scheinen mögen, so groß sind die Gemeinsamkeiten. Jozef Kabaň und Marek Smýkal sind sich einig: Sowohl bei der Gestaltung eines neuen Automobils als auch bei den Werkzeugen für dessen Fertigung kommt es auf höchste Präzision an. Die beiden Manager haben dasselbe Ziel: bestes Design und beste Qualität für die Marke Škoda und ihre Kunden.

#### **BEGEISTERUNG FÜR DIE EINFACHHEIT**

Während Kabaň die Presswerkzeuge mustert und Smýkal ihm Einzelheiten erläutert, wird offensichtlich, wie sehr die Liebe

zum Detail die beiden antreibt – jeden in seinem Metier. „Das Škoda Design zeugt von dem außergewöhnlich hohen Nutzwert, von der Begeisterung für die Einfachheit, Schlichtheit und gleichzeitig von perfekter Ausführung“, erklärt Kabaň. Škoda, das sind für ihn „Autos mit Charakter, mit einer eigenen Seele, denen man ansieht, dass sie von Menschen gemacht werden, die ihr Fach verstehen und lieben.“ Smýkal ergänzt: „Leidenschaft für das Auto und Präzision sind auch im Werkzeugbau unabdingbar. Nur so können unsere Werkzeuge, Formen und Schweißlinien den Entwurf eines Designers exakt wiedergeben und in ein Automobil aus Blech und Stahl umgesetzt werden.“

Kabaň fand über einen von Volkswagen ausgeschriebenen Design-Wettbewerb zu Škoda. Damals noch Student an der „Academy of Fine Arts and Design“ in Bratislava, wurden Automobile für ihn zur Leidenschaft – oder wie er es nennt: zur „Herzensangelegenheit“. „Der Kunde“, so Kabaň, „findet nicht nur rational zu einer Marke und einem Modell. Das Herz entscheidet mit.“ Das Design sei der erste, unmittelbare Kontakt mit einem Automobil. Es rufe intuitiv Emotionen hervor. Kabaň: „Das Design ist ein wesentliches Verkaufsargument. Es spiegelt die Qualität des Produkts wider und prägt die Marke Škoda.“

#### **PRÄZISION UND KREATIVITÄT FINDEN ZUEINANDER**

Präzision und Kreativität – ein Widerspruch? Kabaň und Smýkal bestreiten das. Kabaň erklärt: „Präzision und Kreativität sind unterschiedliche Herangehensweisen, wie Mathematik und Kunst. Dennoch finden sie zueinander. In der Kunst gibt es schließlich Bereiche, die sich mathematisch beschreiben lassen, beispielsweise Proportionen.“



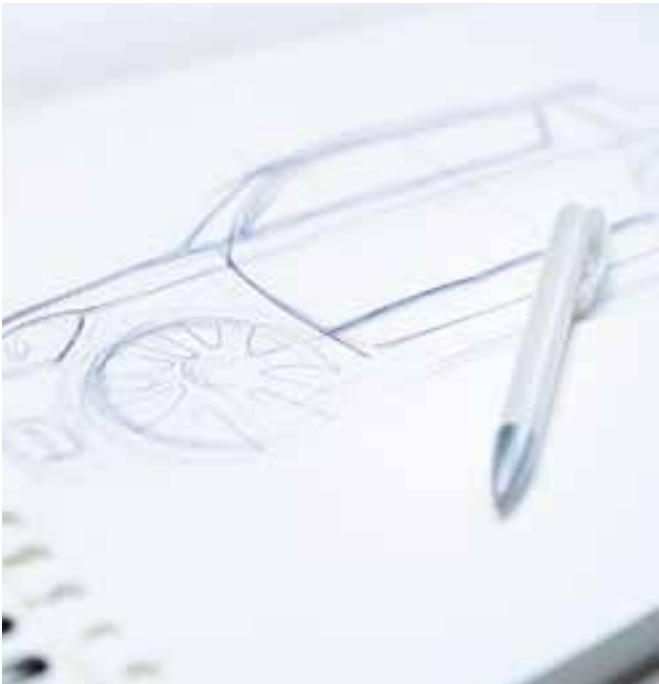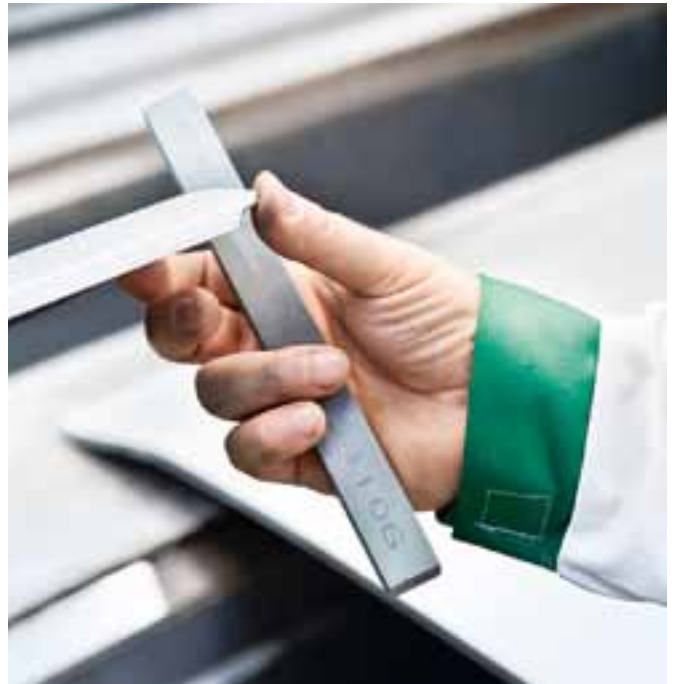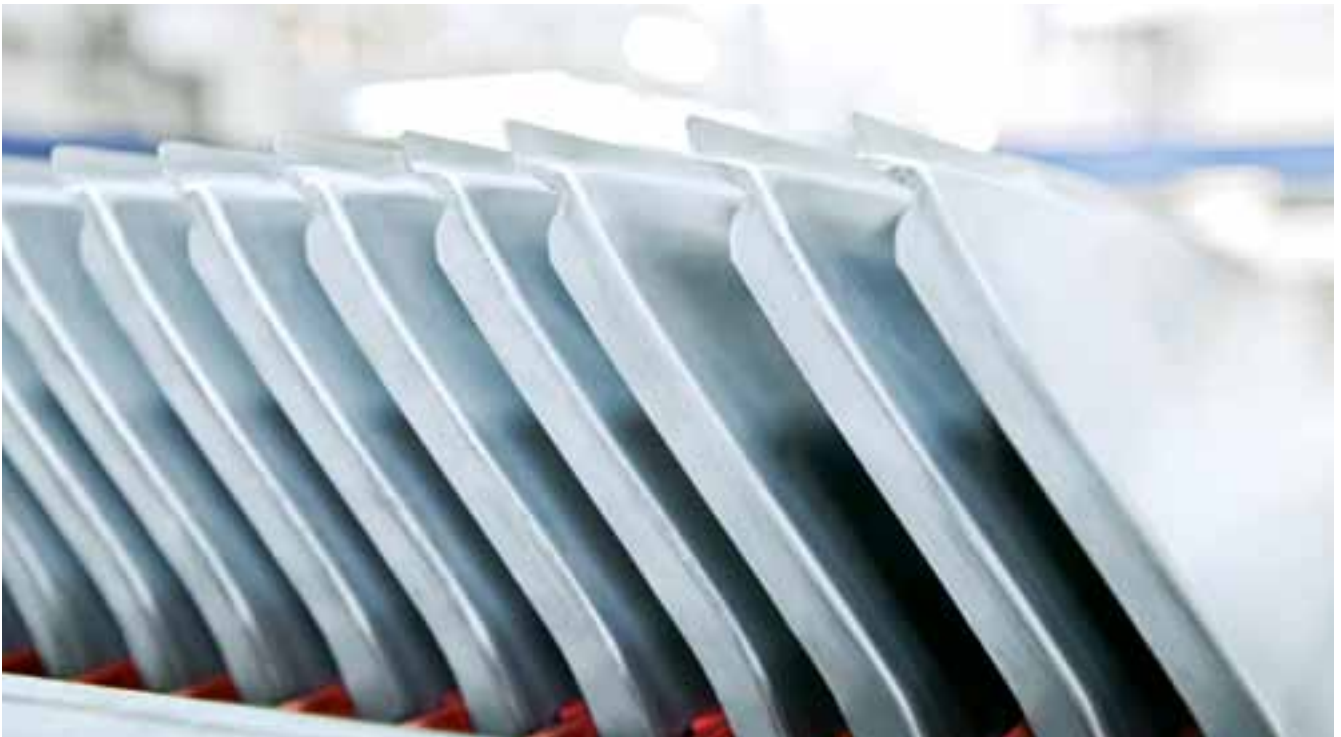

---

Die Präzision im Design wie im Werkzeugbau ist für  
Škoda einer der Schlüssel zum internationalen Erfolg.

---

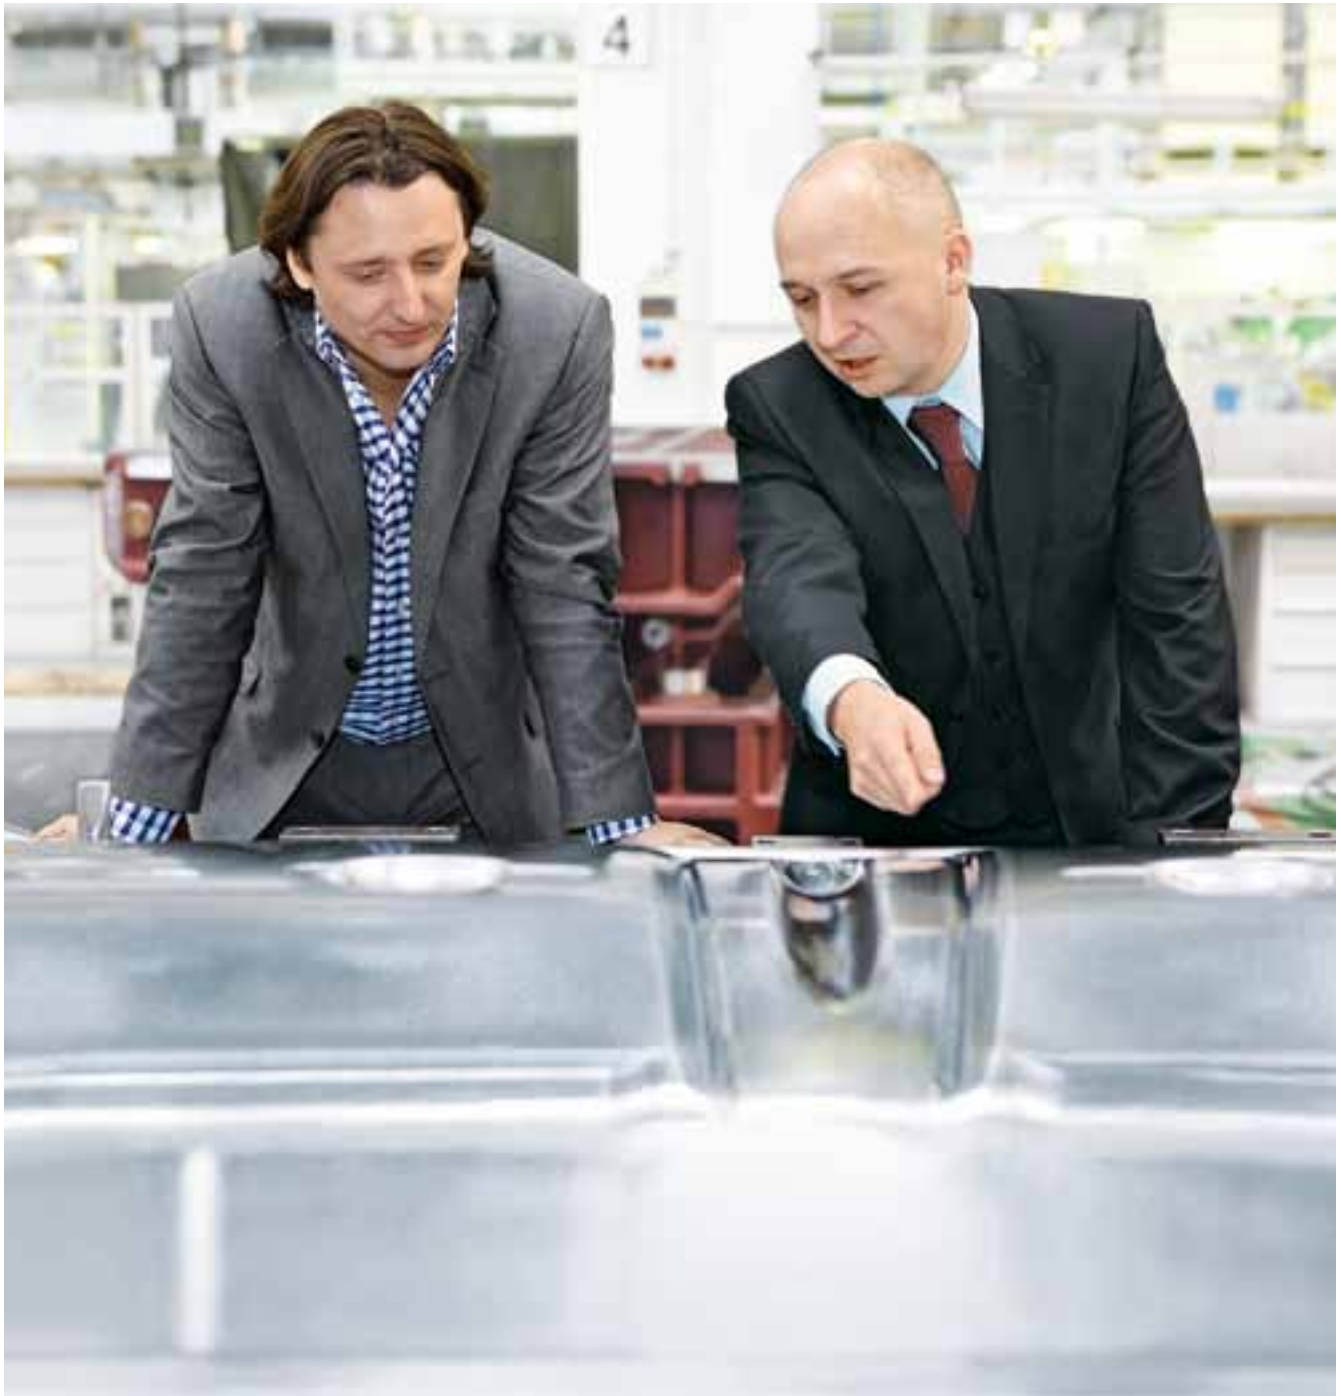

„Das Škoda Design zeugt von dem außergewöhnlich hohen Nutzwert, von der Begeisterung für die Einfachheit, Schlichtheit und gleichzeitig von perfekter Ausführung.“

JOZEF KABAŇ, CHEFDESIGNER ŠKODA AUTO



„Form ist Design, und Design ist Marke“, stimmt ihm der 39-jährige Marek Smýkal zu, und als Beispiel dafür nennt er die Fronthaube mit der charakteristischen Wölbung, die bei allen Škoda Modellen das Markenlogo auf der Haube betont. Smýkal ist gleich nach seinem Hochschulstudium bei dem tschechischen Autobauer eingestiegen. Das war vor 15 Jahren. Heute ist er als Leiter des Vorrichtungs- und Werkzeugbaus verantwortlich für die exakten Maße, sauberen Kanten und makellosen Oberflächen.

#### SCHNITTSTELLE ZUR PRODUKTION

Kabaň und Smýkal diskutieren inzwischen über Formverläufe und Konturen anhand von Designskizzen, die der Chefdesigner zu dem Gespräch mitgebracht hat. „Auch unsere Spezialisten müssen immer wieder äußerst kreativ sein, wenn sie den Entwurf des Designers umsetzen“, so Smýkal. Dabei gilt es auch, immer wieder neue Wege zu beschreiten, zum Beispiel bei Gestaltungs- oder Entwicklungsideen, die in der Produktion nur schwer umsetzbar sind. Der Werkzeugfachmann weiß: „Physikalische Grenzen, beispielsweise eines Werkstoffs im Umformprozess, sind unerbittlich. Sie zu überschreiten würde bedeuten, Qualitätseinbußen in Kauf zu nehmen. Das kommt für uns nicht infrage.“ Der Chefdesigner nickt. Er schätzt das technische Potenzial des Werkzeugbaus – auch wenn dieser dem Gestaltungsfreiraum des Designs manchmal die notwendigen Grenzen setzt.

Kabaň und Smýkal sind mittlerweile vom Werkzeugbau in das hochmoderne Designzentrum von Škoda Auto gewechselt. Hier arbeiten die knapp 70 festangestellten Designer an immer neuen Gestaltungsmöglichkeiten: Die äußere Hülle, der Innenraum, die Farben, Lacke und Materialien für die Polster, aber auch das Zubehör eines neuen Automobils werden in diesen Räumen nach strengen ästhetischen und funktionalen Gesichtspunkten entworfen. Mindestens zwei Jahre dauert es, bis die Arbeiten der Škoda Designer zu den Kunden gelangen.

Die Experten aus dem Werkzeugbau sind von Anfang an in den Entwicklungsprozess mit einbezogen. Der Austausch zwischen Designern und Produktionsfachleuten ist heute Arbeitsalltag. So wie jetzt in Jozef Kabaň's Büro. Smýkal: „Meine Mitarbeiter überprüfen in einem sehr frühen Stadium die Entwürfe auf ihre Umsetzbarkeit. Sie bewerten, ob wir die Formen und Flächen, die Jozef Kabaň und sein Team entwerfen, auch tatsächlich fertigen können und welche Voraussetzungen und Bedingungen dafür nötig sind. Anhand der Entwürfe führen wir mit spezieller Hard- und Software Simulationen durch und geben der Technischen Entwicklung dann unsere Rückmeldung.“

#### MASSSCHNEIDEREI IN BLECH

Dieses Zusammenspiel zwischen Design und Werkzeugbau ist für Škoda einer der Schlüssel zum Erfolg. Beide Bereiche arbeiten im gesamten Volkswagen Konzern marken- und länderübergreifend zusammen und können so aus einem großen Erfahrungsschatz schöpfen. Für die ehrgeizigen Wachstumspläne von Škoda Auto sehen sich die beiden Meister der Feinabstimmung Marek Smýkal und Jozef Kabaň deshalb bestens gerüstet. Kabaň: „Wir bauen Autos für die ganze Welt – mit großem Erfolg. Denn wir sind uns darüber im Klaren, dass die Welt nichts Abstraktes ist, sondern dass es immer um konkrete Menschen geht.“ Für diese Menschen entwirft Kabaň seine neuen Škoda Modelle, und für diese Menschen „schneidet“ Smýkal das Blechkleid: „Wie ein Herrenausstatter einen Anzug maßanfertigt, so passen wir unsere Autos den Bedürfnissen unserer Kunden in den verschiedenen Ländern an. Bis ins letzte Detail. Darauf kommt es an.“ Perfekt und präzise.

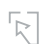

**WEITERE INFORMATIONEN**  
[www.skoda-auto.com](http://www.skoda-auto.com)

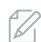

**AUTORIN**  
Katrin Materna

ESSAY

# Räume bewegen.

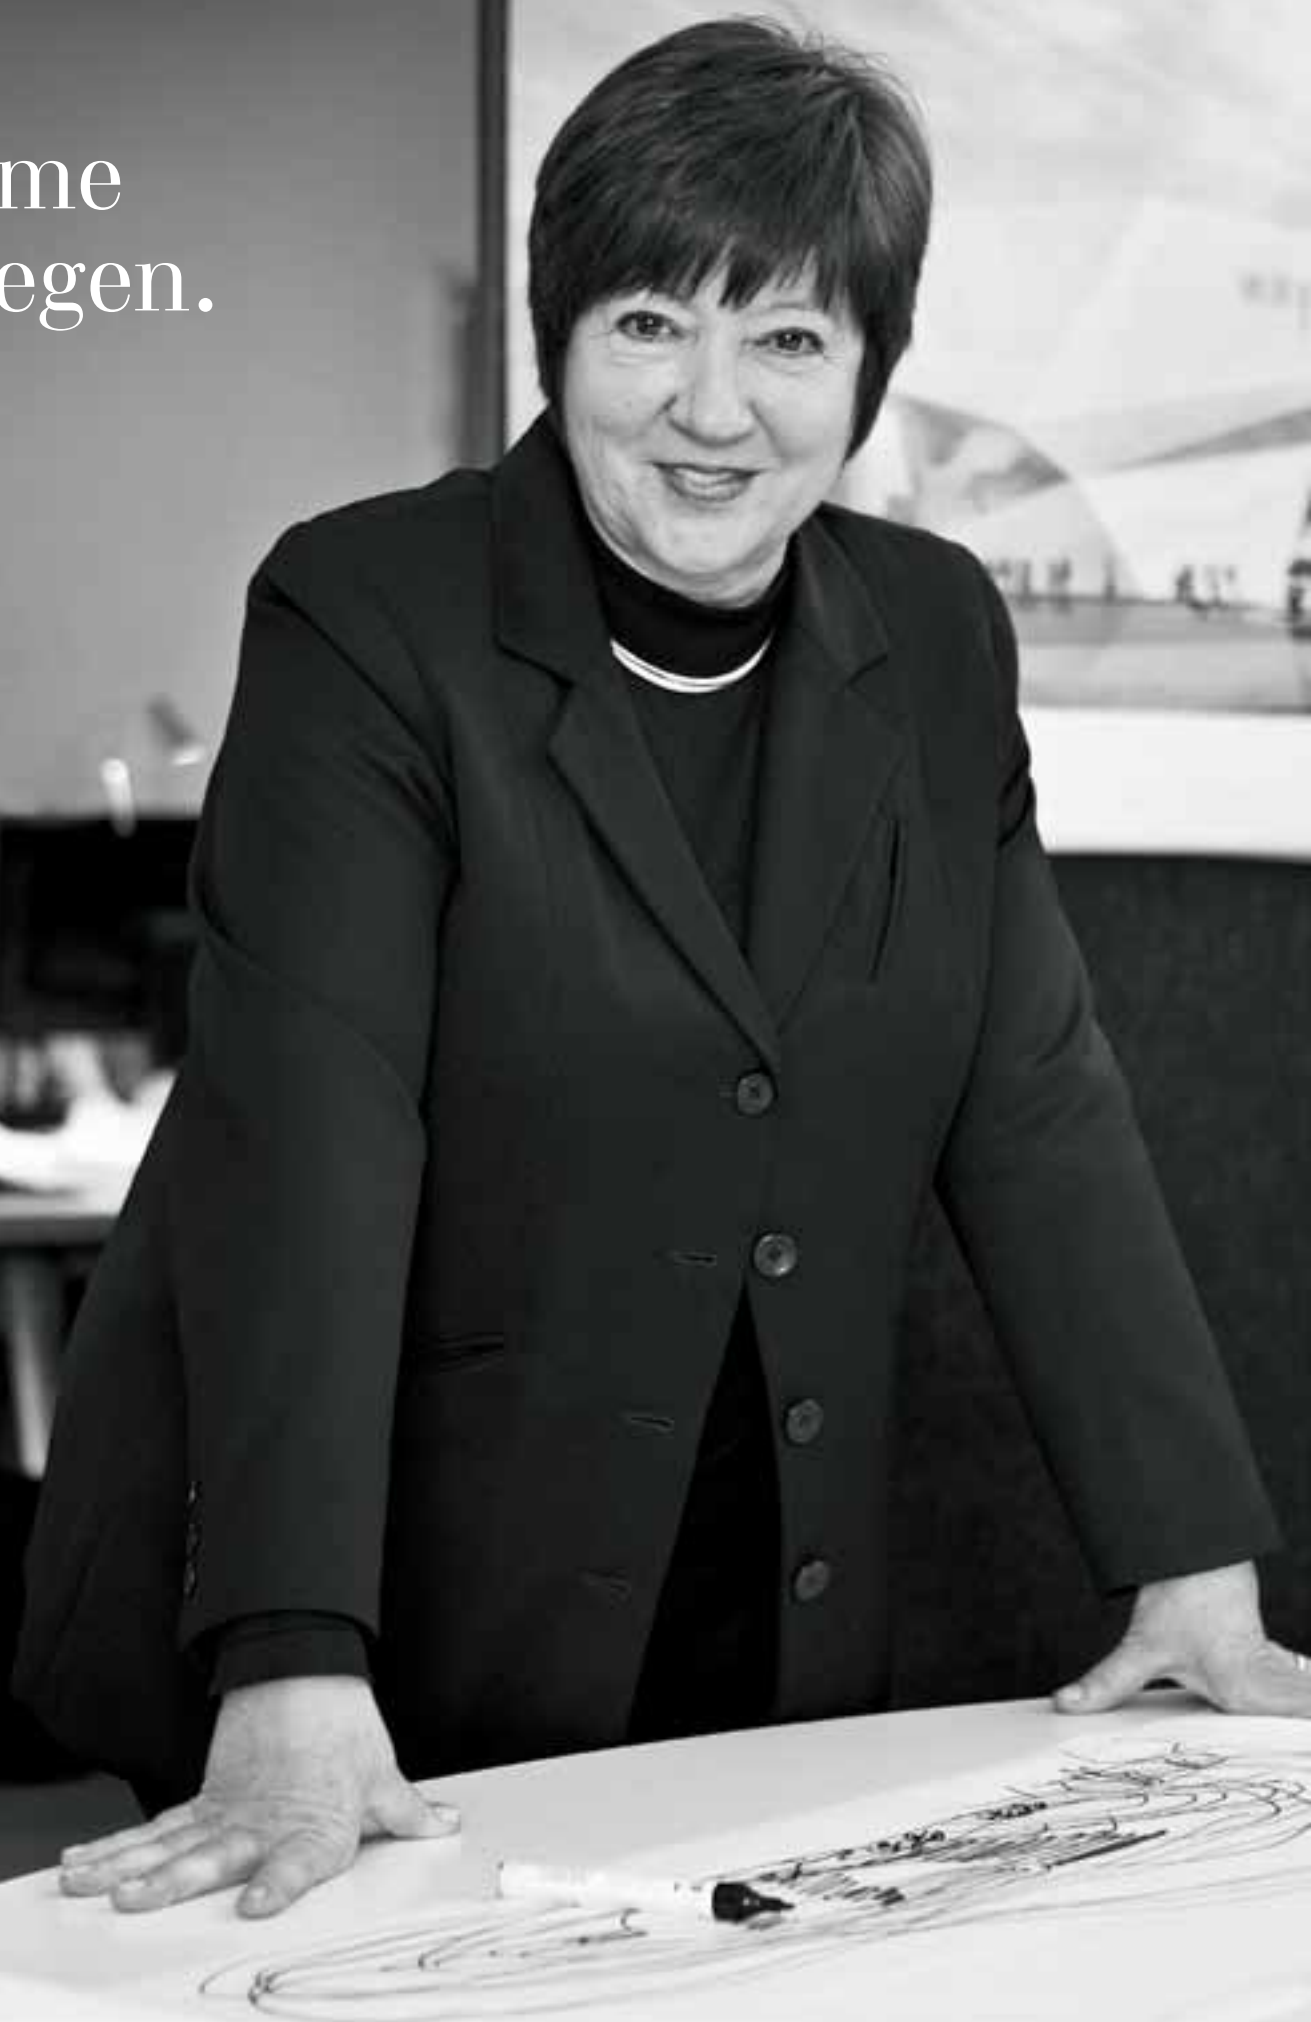



Die Stadt und eine gut funktionierende Verkehrsinfrastruktur gehören elementar zusammen. Heute schon lebt über die Hälfte der Weltbevölkerung in Städten. Die großen Metropolen wachsen weiter, neue Mega-Städte entstehen. Der städtische Raum befindet sich im Umbruch: Nach der jahrzehntelangen Flucht in die Peripherie werden die Zentren der Stadt durch unterschiedlichste Altersschichten und Lebensstile hinweg wieder als attraktive Orte begriffen, in denen sich Leben und Arbeiten miteinander vereinen lässt. Wie sich Menschen in Zukunft in der Stadt bewegen, wird auch die Architektur wesentlich beeinflussen. Von der individuellen Wohnung bis hin zu städtebaulichen Konzepten – es wird eine völlig neue urbane Ästhetik entstehen.

Urbane Räume als positiv erlebbare und lebbare Räume zu gestalten, das ist für mich als Architektin eine zentrale Aufgabe. Der Lebensraum Stadt ist ein Organismus aus sich überlagernden Räumen, Geschichten, Menschen – alle in ständiger Veränderung und damit Bewegung. Räume in der Stadt haben dabei unterschiedlichste Funktionen und Wirkungen: suggestiv anregend, herausfordernd oder beruhigend. Wenn wir uns in solchen Räumen bewegen, entstehen räumlich-körperhafte Prozesse. So erleben wir Architektur – mit Augen, Ohren, durch Ertasten und durch unsere Bewegung im Raum.

Stadtautobahnen, Zugverbindungen, öffentliche Verkehrsmittel sind die Lebensadern im städtischen Raum. Und gleichzeitig ist der wachsende Verkehr mit seinen teilweise drastischen Folgen gemeinsame Herausforderung für Stadtplaner, Architekten und Autobauer. Denn das Auto ist und bleibt ein elementarer Bestandteil im Lebenssystem Stadt.

Emissionen, steigende Verkehrsdichte, Parkplatznot verlangen nach neuen, intelligenten Ideen und alternativen technischen Lösungen wie zum Beispiel die Elektromobilität, um Bewegung in der Stadt auch in Zukunft möglich zu machen. Und um sie ökologisch sinnvoll und lebenswert zu gestalten.

Die Stadt der Zukunft braucht beides: Bewegung und Balance. Und beides kann in der Architektur unmittelbar ablesbar sein. Unser Projekt in Shanghai, die Architektur des Deutschen Pavillons auf der World Expo 2010, war ein solches begehbares Sinnbild für Balance. Die Gebäudeteile stützten sich gegenseitig. Man spürt, wie wichtig Gleichgewicht ist. Gleichgewicht als Sinnbild für unsere Städte von morgen. Gleichgewicht als Voraussetzung für Bewegung.

#### SUSANNE SCHMIDHUBER

Susanne Schmidhuber, geboren 1956, ist Innenarchitektin und gründete 1984 zusammen mit ihrem Mann Prof. Klaus Schmidhuber das Architekturbüro Schmidhuber+Partner in München, in dem sie heute mit vier Partnern und einem Team aus rund 60 Architekten, Innenarchitekten und Designern arbeitet. Schmidhuber+Partner zeichnete für den preisgekrönten Deutschen Pavillon auf der EXPO 2010 in Shanghai verantwortlich und entwirft regelmäßig Ausstellungsarchitektur und Messestände, unter anderem für Audi, Lamborghini und MAN.

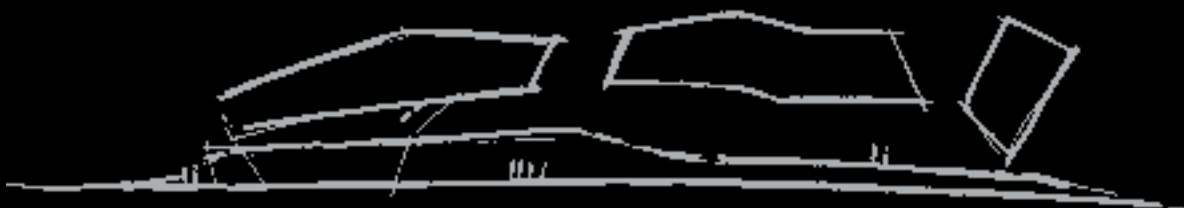

URBANE RÄUME POSITIV ERLEBEN

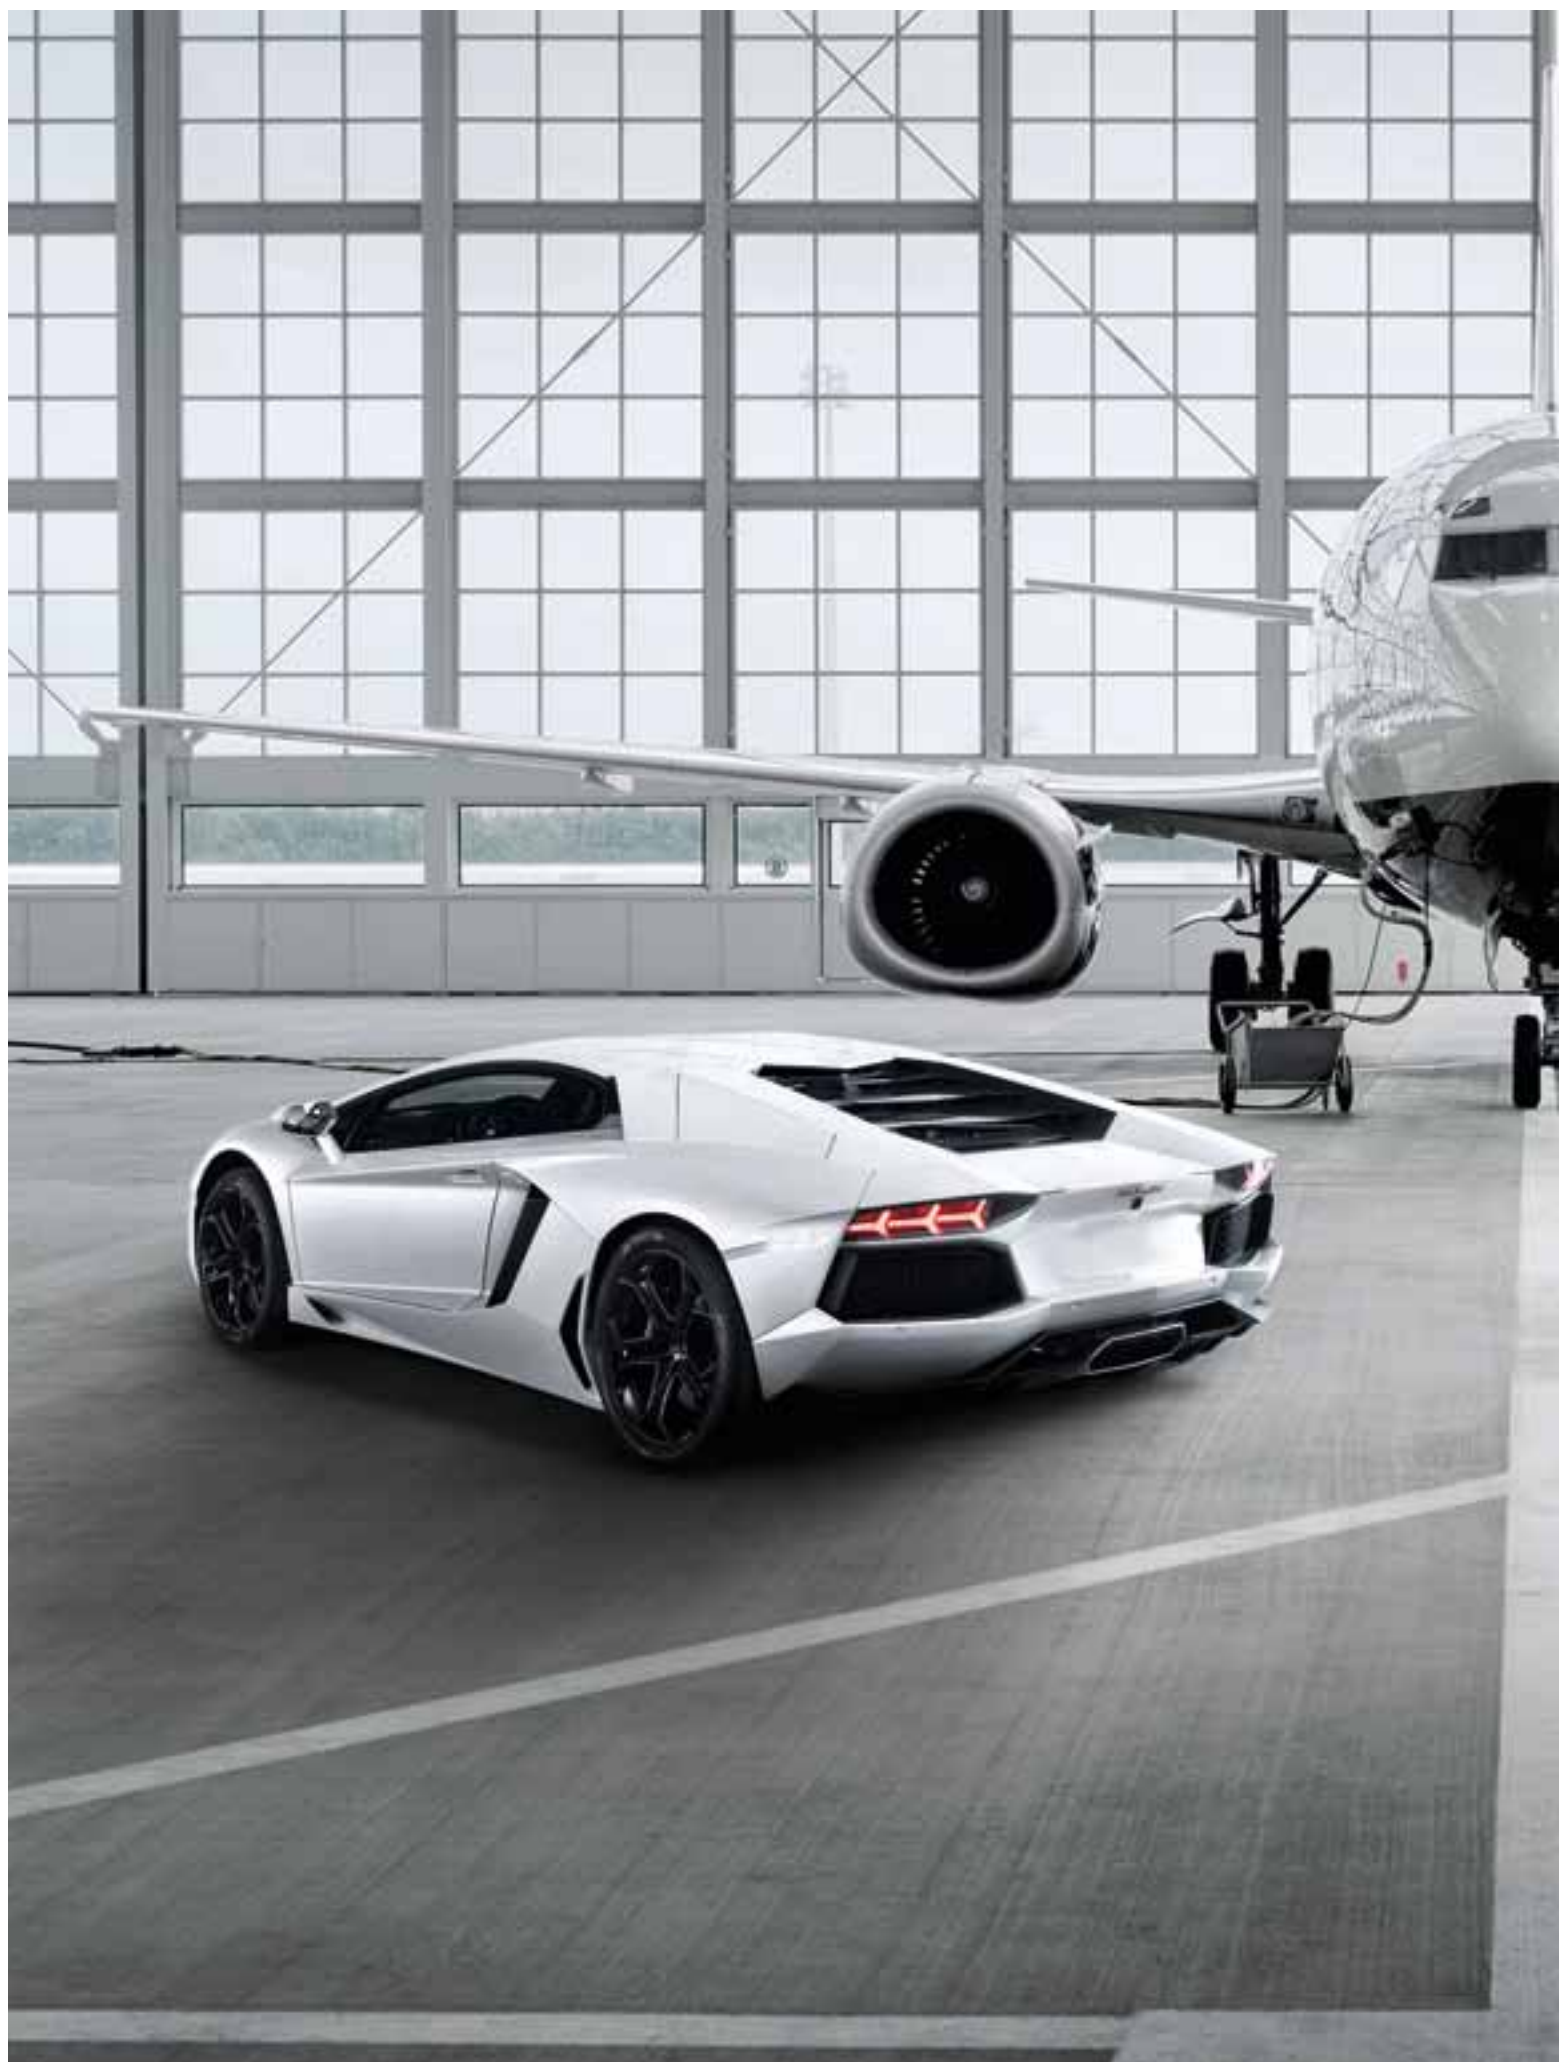



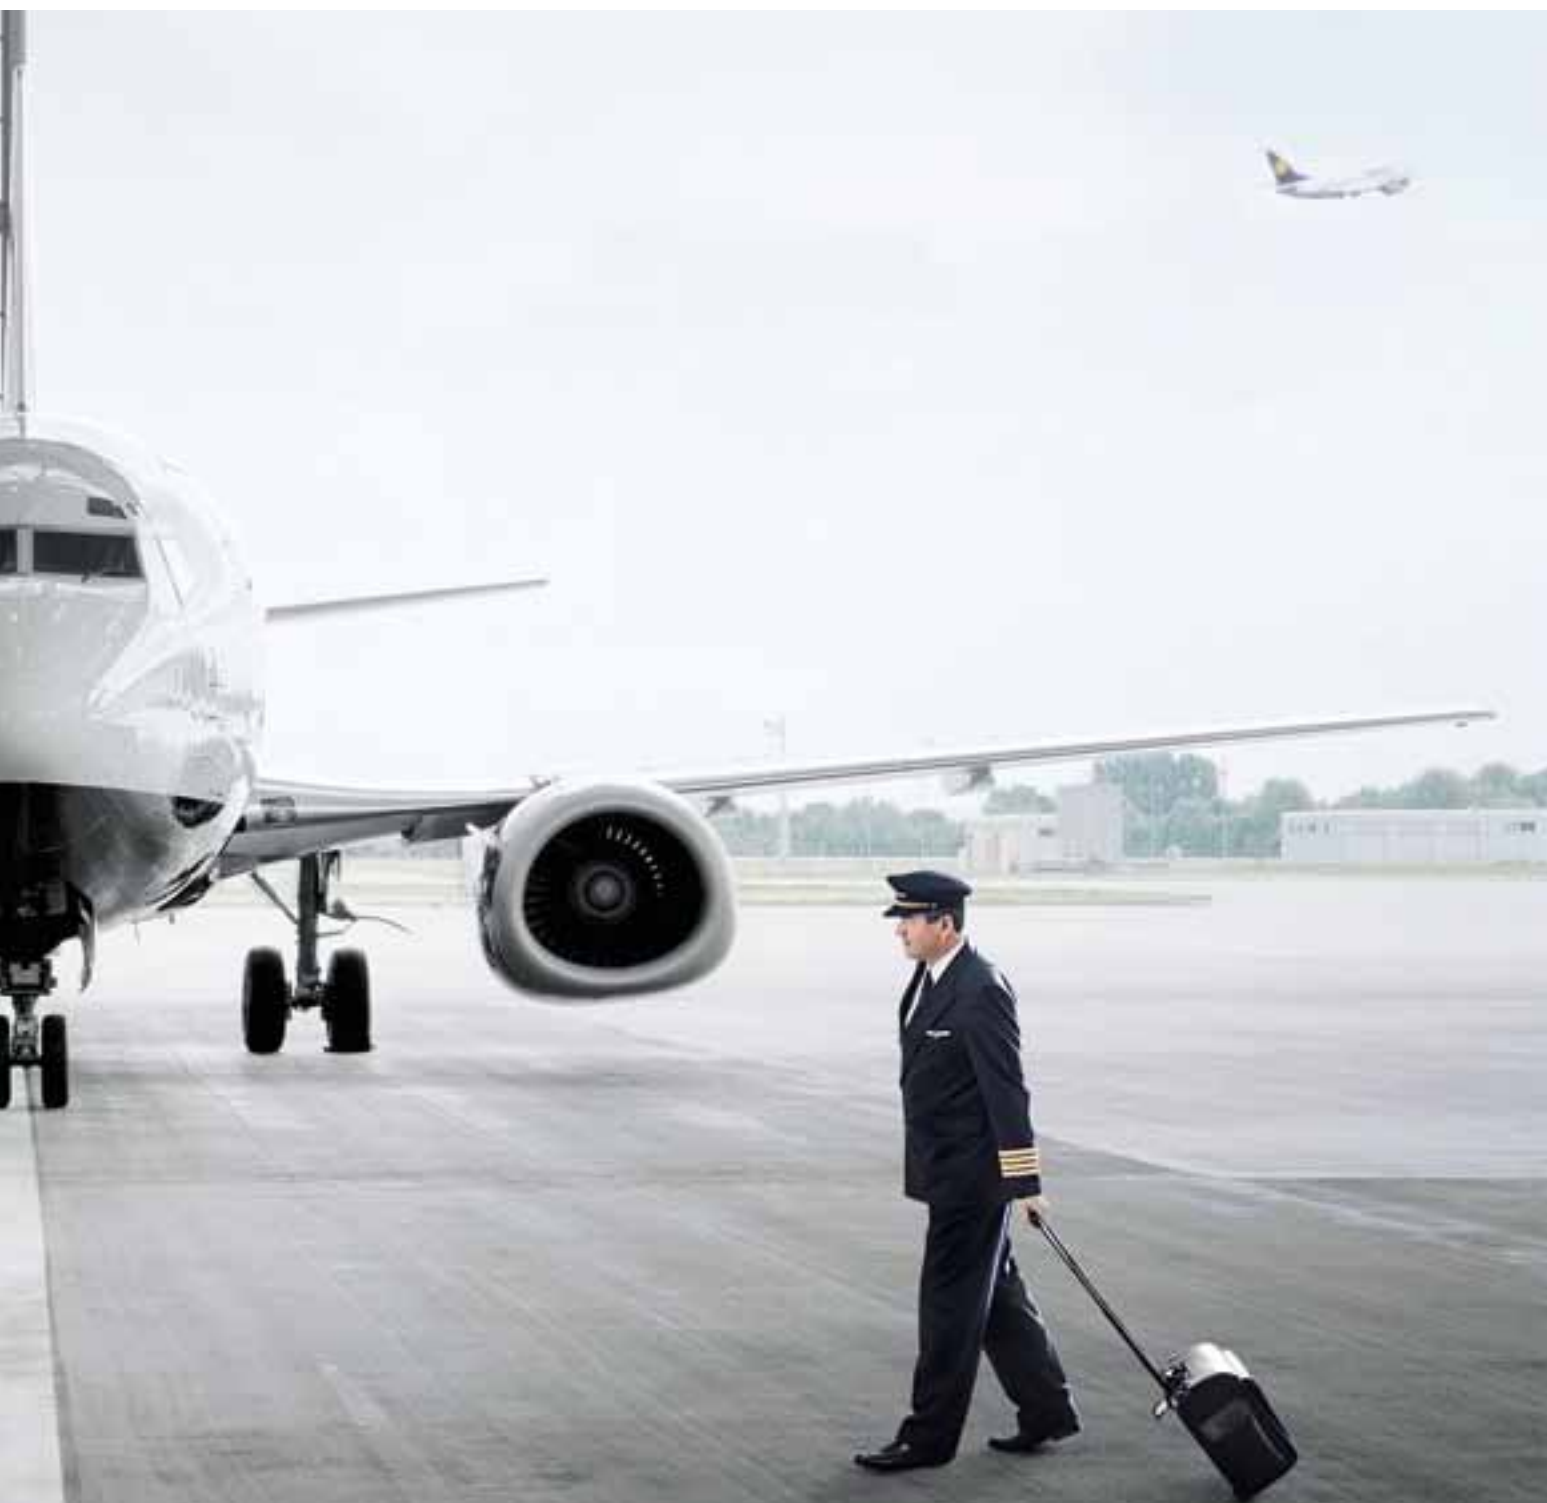

# Leicht-Athleten.

Was verbindet einen Supersportwagen von Lamborghini, eine Boeing Dreamliner und einen Callaway-Golfschläger? In allen drei findet sich der superleichte, aber dennoch extrem steife Werkstoff Carbon. Bei der Materialentwicklung arbeiten der Sportwagenhersteller, der Flugzeugbauer und das US-Unternehmen Callaway zusammen. Lamborghini setzt Kohlefaser-Werkstoffe seit fast 30 Jahren ein und zählt damit zur automobilen Leichtbau-Avantgarde.

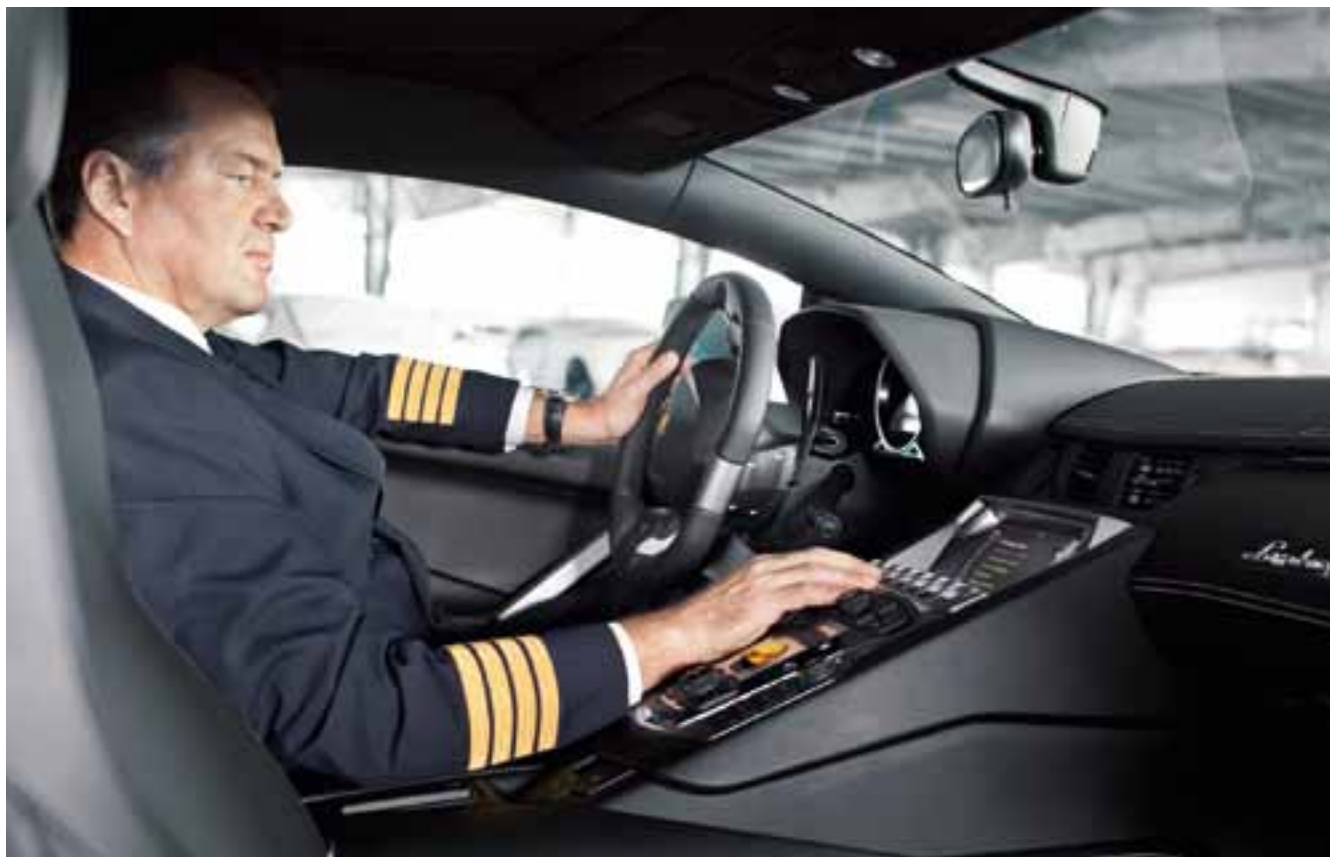

**AN MÄCHTIGE TRIEBWERKE GEWÖHNT** – und dennoch beeindruckt von der Leistung der Sportwagen aus Sant’Agata: Kapitän Werner Knorr, Flugbetriebsleiter und damit Chef der 5.000 Piloten bei Lufthansa.

Dieses Frachtstück wollte er sich persönlich ansehen. Kapitän Werner Knorr, Flugbetriebsleiter bei Lufthansa und damit Chef von 5.000 Piloten mit dem Kranich auf der Schirmmütze, hat eine Menge Kerosin im Blut. Aber auch genügend Benzin, um sich bei einem Zwischenstopp auf dem norditalienischen Flughafen Bologna einen Blick auf ein ganz besonderes Auto zu gönnen. Auf dem Luftweg ist es unterwegs zu seinem zukünftigen Besitzer in den Vereinigten Arabischen Emiraten: Lamborghinis neuestes Meisterstück, der Supersportwagen Aventador LP 700-4. 700 PS stark, in bester Lamborghini Tradition angetrieben von einem hochdrehenden V12-Saugmotor. Das 6,5-Liter-Aggregat ist mit 235 Kilogramm ein Leichtgewicht und begleitet akustisch eindrucksvoll jeden Auftritt des Sportwagens: mit moderatem, kehligem Grollen bei niederen Touren bis zum fauchenden Crescendo beim vollen Ausdrehen der Gänge.

Sanft dröhnend rollt er herein, wie eine moderne Skulptur nimmt er Platz in der kargen Halle. Knorr, aus Profession an mächtige Triebwerke gewöhnt, nähert sich dem in Perlglanz schimmernden Aventador LP 700-4 mit einer Mischung aus Neugierde und offenkundigem Respekt. Das Auto fasziniert den

Flugzeugexperten. Er will mehr wissen: Wie wird er hergestellt? Wie schwer ist das Auto? Welche Materialien werden verwendet? Und vor allem möchte er ihn fahren. Knorr, bekennender Sportwagenfan, seinen drei Kindern zuliebe derzeit Besitzer eines geräumigen Familienautos, liebäugelt mit einem „etwas schnelleren Auto“. Ob’s auch ein Lambo werden könnte? Er sagt nicht Ja und nicht Nein. Aber es ist ihm anzusehen, dass er dieses Auto mit dem berühmten Stier-Wappen nicht aus seiner Garage schubsen würde.

#### **LEICHTBAU-WISSENSCHAFT IN SANT’AGATA**

Antworten auf seine Fragen bekommt Knorr von Luciano De Oto im 2010 gegründeten „Advanced Composites Research Center“ im Lamborghini Werk in Sant’Agata Bolognese, unweit von Bologna. Der 40-jährige Italiener zeichnete für die Entwicklung der Gesamtkarosserie des neuen Supersportlers verantwortlich, bevor er die Leitung des Entwicklungszentrums für Verbundwerkstoffe übernahm. Etwa 30 Spezialisten unterschiedlicher Fachrichtungen arbeiten hier an Konstruktions- und Produktionsmethoden, insbesondere für Komponenten aus Kohlefaser.



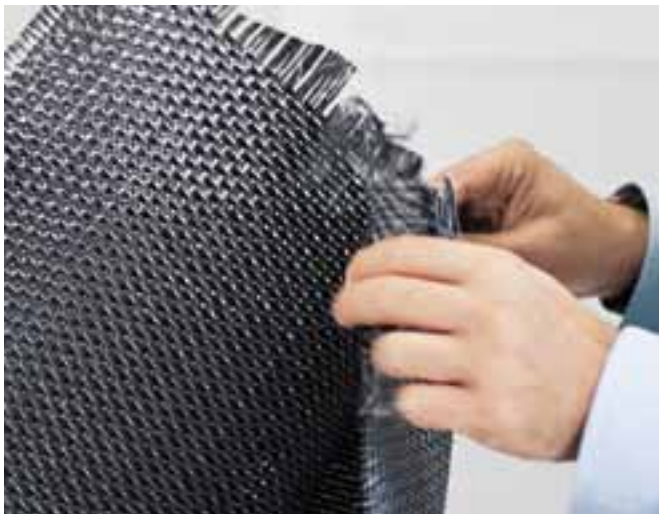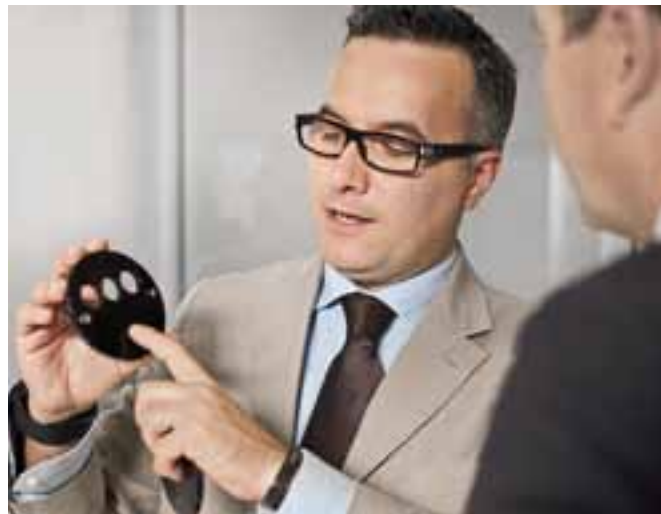

## „Kohlefaser-Verbundwerkstoffe werden den Automobilbau der Zukunft maßgeblich prägen.“

LUCIANO DE OTO, LEITER DES LAMBORGHINI ADVANCED COMPOSITES RESEARCH CENTER

Es ist das sechste Element im Periodensystem: Kohlenstoff – ein Material, bei dem Flugzeugbauer und Autoingenieure gleichermaßen ins Schwärmen geraten. „Carbon ist federleicht und trotzdem extrem fest. Und jedes eingesparte Kilogramm Gewicht reduziert Verbrauch und Emissionen, in der Luft genauso wie auf der Straße“, erklärt Luciano de Oto. Kohlefaserverstärkte Kunststoffe gehören heute zu den wichtigsten Materialien, die Automobilbauer einsetzen, um die Gewichtsspirale zu kontrollieren, denn immer umfangreichere Sicherheits- und Komfortausstattungen machen die Fahrzeuge stetig schwerer. Die Extrakilos müssen an anderer Stelle abgespeckt werden – ohne Einbußen bei Sicherheit, Fahrkomfort und Dynamik. Carbonfasern machen's möglich.

Lamborghini gilt als Pionier im Umgang mit dem superleichten Material. Bereits Anfang der Achtzigerjahre entstanden erste Prototypen mit einem Chassis aus kohlefaserverstärkten Werkstoffen. Ab 1985 wurden sie als Serienteile im legendären Modell Countach verbaut. 25 Jahre später macht der Lamborghini Gallardo LP 570-4 Superleggera seinem Beinamen „Superleicht“ alle Ehre. Dank Kohlefaserteilen an der Karosserie, im Innenraum sowie in der Technik bringt er

rund 70 Kilogramm weniger auf die Waage als sein Vorgänger. Auch in der Rohkarosserie des Lamborghini Murciélago, dessen Produktion im Mai 2010 nach 4.099 gebauten Exemplaren auslief, steckte bereits Carbon, alles in allem 93 Kilogramm.

### LEICHTER FÜR MEHR LEISTUNG

„Die konsequente Weiterentwicklung der Kohlefaser-Technologie ist ein wichtiger Baustein in unserer Strategie“, sagt Stephan Winkelmann, Präsident und CEO von Automobili Lamborghini S.p.A., denn: „Bei Sportwagen wird die Gewichtsreduktion zum zentralen Thema, weil eine weitere Steigerung der Leistung wegen der Emissionsbeschränkungen begrenzt ist.“ Einen Ausblick auf den Leichtbau der Zukunft gab Lamborghini im Herbst 2010 auf dem Pariser Automobilsalon mit dem Technologieträger Sesto Elemento („Sechstes Element“): Mit 570 PS aus einem V10-Triebwerk und einem Gesamtgewicht von nur 999 Kilogramm erreicht er ein sensationelles Leistungsgewicht von 1,75 Kilogramm pro PS. Der Sesto Elemento steht für Hochleistung in der Leichtgewicht-Klasse – dank Kohlefaser-Materialien in der Fahrzeugstruktur, in der Karosserieaußenhaut sowie im

„Bei Sportwagen wird die Gewichtsreduktion zum zentralen Thema, weil eine weitere Steigerung der Leistung wegen der Emissionsbeschränkungen begrenzt ist.“

STEPHAN WINKELMANN, PRÄSIDENT UND CEO AUTOMOBILI LAMBORGHINI

Fahrwerk und im Antriebsstrang. Dort findet sich der superleichte Werkstoff bei Querlenkern, in der Kardanwelle und sogar in den Felgen.

Teure Zukunftsmusik für die Serienfertigung. Noch. Doch mit dem neuen Aventador LP 700-4 stellt Lamborghini einige Zukunftstechnologien schon heute auf die Straße. 1.575 Kilogramm leicht ist er. Mit einem Leistungsgewicht von 2,25 Kilogramm pro PS gibt Lamborghinis Jüngster einen neuen Rekordwert im Serien-Sportwagenbau vor. Seine Karosserie ist rund ein Drittel leichter als die des Vorgängermodells Murciélagos. Die Pfunde schwanden dank der Monocoque-Passagierzelle aus kohle-

faserverstärktem Kunststoff und einer neu entwickelten Aluminium-Rahmenstruktur, die in der Lamborghini V12-Klasse die bisher verwendete Stahlrahmenstruktur ablöst.

#### OB ZU LANDE ODER IN DER LUFT: JEDES KILO ZÄHLT

Leichtbau-Experte De Oto und der Lufthansa-Chefpilot sind inzwischen tief in die Welt der neuen Werkstoffe eingetaucht. Sie diskutieren Entwicklungsideen mit kohlefaser-verstärkten Kunststoffen für die Straße und die Luft. Flugzeugbauer Boeing gilt als Vorreiter beim Einsatz von Carbon-Werkstoffen. Der amerikanische Hersteller plant, Kohlefaser-Verbundwerkstoffe unter anderem für Flug-

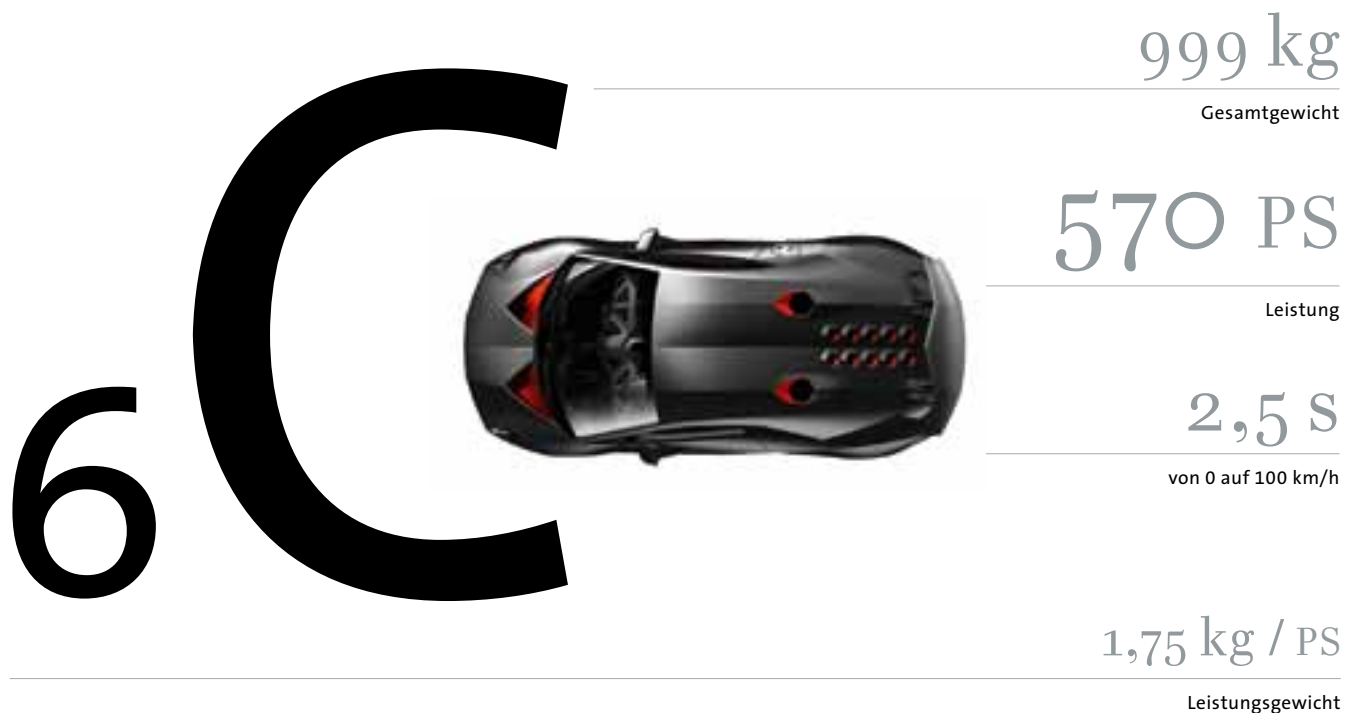

**DIE „LEICHTE“ ZUKUNFT** – Mit dem Technologieträger Sesto Elemento („Sechstes Element“) knackten die Lamborghini Ingenieure die 1.000-Kilogramm-Grenze bei einem reinrassigen Sportwagen – dank vielfältigen Einsatzes von Kohlefaser-Werkstoffen. „C“, das sechste Element des Periodensystems, steht für Kohlenstoff, das Ausgangsmaterial für Carbonfasern.



zeugfensterrahmen einzusetzen. Und exakt dieses Carbon-Material, das Boeing derzeit testet, hat auch Lamborghini für Karosserieteile in der Erprobung.

Einmal im Monat fliegt De Oto nach Seattle, in die Heimat von Boeing. An der dortigen Universität unterhält Lamborghini ein eigenes, kleines Labor, in dem Wissenschaftler das Verhalten von Carbon-Materialien testen – in enger Kooperation mit dem Flugzeughersteller. Lamborghini und Callaway, der US-amerikanische Golfschläger-Hersteller, berühmt für den Super-Driver „Big Bertha“, arbeiten gemeinsam an der Entwicklung neuer Kohlefaser-Verbundstrukturen. Laut De Oto konzentriert man sich auf Materialien mit mikroskopisch kleinen Kohlefaser-Bestandteilen. Die sind nicht nur sehr leicht und stabil, sondern können auch in Kleinserie wirtschaftlich hergestellt werden.

De Oto geht ins Detail, erläutert „500.000 ineinander verflochtene Fasern pro Quadratzoll“ und zeigt seinem deutschen Gast Teile aus dem neuen Werkstoff. Beide tasten, biegen und prüfen die verschiedenen Komponenten. Der neue Werkstoff werde den Automobilbau der Zukunft maßgeblich prägen, ist De Oto überzeugt. Auch weil ein neues, patentiertes Herstellungsverfahren es den Ingenieuren – bei Lamborghini wie bei Callaway – ermöglicht, bei den Carbon-Komponenten eine vorher unerreichte Präzision zu erzielen. Lamborghini be-

herrscht schon heute als einziger Automobilhersteller weltweit alle Produktionsschritte der Kohlefaser-Fertigung im eigenen Haus – vom 3-D-Design über Simulation, Test, Produktion und Absicherung.

#### NUR FLIEGEN IST SCHÖNER

Und dann rollt der neue Aventador LP 700-4 vor die große, gläserne Eingangstür, durch die Ferruccio Lamborghini, der 1993 verstorbene Firmengründer, einst in sein Büro im ersten Stock ging. Werner Knorr ist nun doch ein bisschen angespannt: 700 PS warten auf ihn, in einem Supersportwagen, mit dem Lamborghini der Zeit voraus ist.

Die Schirmmütze mit dem Kranich bleibt zurück. Knorr steigt auf den Pilotensitz und steuert auf die Landstraße aus Sant’Agata Bolognese hinaus. Man sieht ihn nicht mehr, nur das Fauchen der zwölf Zylinder bleibt noch eine kurze Weile in der Luft.

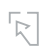

**WEITERE INFORMATIONEN**  
[www.lamborghini.com](http://www.lamborghini.com)

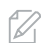

**AUTORIN**  
Tina Rumpelt

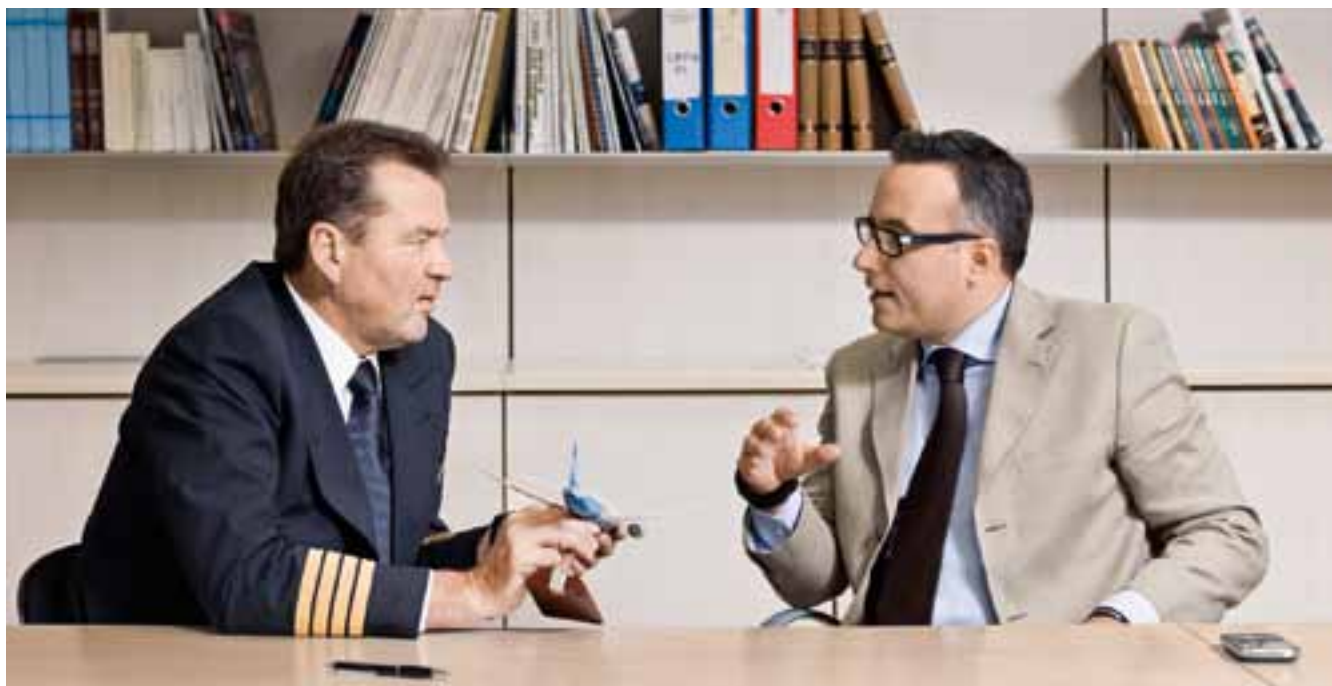

**BEIM LEICHTBAU AUF EINER WELLENLÄNGE** – Lufthansa-Chefpilot Werner Knorr und Luciano De Oto, Leiter des Entwicklungszentrums für Verbundwerkstoffe in Sant’Agata. Lamborghini und der Flugzeugbauer Boeing, Vorreiter beim Einsatz von Carbon-Werkstoffen im Flugzeugbau, kooperieren bei der Entwicklung von Kohlefaser-Werkstoffen.

# Bell'arte.

Er schuf innerhalb von nur zwei Jahren drei automobile Ikonen: den Ur-Golf sowie die ersten Generationen des Passat und des Scirocco. Sein Unternehmen Italdesign arbeitet fast 40 Jahre lang eng mit Volkswagen zusammen – seit 2010 als neues Mitglied der Konzernfamilie. Ein Gespräch in der Wolfsburger Autostadt mit dem Ausnahmedesigner Giorgetto Giugiaro.

## Herr Giugiaro, wie kam vor fast 40 Jahren die Zusammenarbeit mit Volkswagen zustande?

Die damals führenden Herren von Volkswagen gingen zusammen mit einer Reihe von Fachleuten und Journalisten über den Turiner Automobilsalon und wählten sechs Modelle aus, die ihnen besonders herausragend erschienen. Vier dieser Autos stammten von mir. Damit fing alles an.

## Sie haben den Golf I entworfen, der 1974 Weltpremiere hatte. Haben Sie je einen besessen?

Aber natürlich. Volkswagen baute 1977 zwei Golf GTI als Spezialanfertigung mit noch stärkerem Motor, vier Türen und einer exklusiven Innenausstattung. Einen bekam ich, den anderen der Dirigent Herbert von Karajan, ein richtiger Autonarr. Ich habe den Golf in Turin als flotten und stadtauglichen Familienflitzer benutzt. Diese Autos waren damals unheimlich begehrt – so begehrt, dass mein GTI gestohlen wurde. Wir fanden ihn nach einiger Zeit aber wieder. Heute hat er seinen Ehrenplatz in unserem kleinen Museum.

## Wo liegen die Schwerpunkte der Arbeit von Italdesign Giugiaro heute?

Italdesign ist eine Denk- und Entwicklungsfabrik. Im Zentrum stehen bei uns Ingenieurleistungen. Dank jahrzehntelanger Erfahrung kennen wir die komplexen Entwicklungsprozesse im Automobilbau ganz genau. So können wir schlüsselfertige Fahrzeugkonzepte abliefern, die sich in der Produktion eins zu eins umsetzen lassen. Es geht darum, aus der Form für die Außenhaut und für die Innenausstattung Baupläne für alle spezifischen Einzelteile abzuleiten. Dafür müssen Normen und Sicherheitsstandards, aber auch eine möglichst kostengünstige Produktionsweise berücksichtigt werden. Derartig umfassende Entwicklungskapazitäten sind heute ein gefragtes Gut.

## Die meisten Menschen kennen Sie durch Ihre spektakulären Design-Entwürfe...

20 Prozent unserer Arbeit widmen wir automobilen Träumen, Studien oder Konzeptfahrzeugen. Sie machen Schlagzeilen, weil sie Emotionen wecken. Und sie sind auch Aushängeschild und Visitenkarte unseres Unternehmens. Von mehr als 800 Mitarbeitern bei Italdesign Giugiaro arbeiten aber nur etwa 10 Prozent als Designer.

## Warum haben Sie sich entschieden, Volkswagen den Zuschlag für Ihr Unternehmen zu geben?

Bei Volkswagen überlässt man nichts dem Zufall und arbeitet konsequent an der Weiterentwicklung seiner Fahrzeuge. Es zählen drei Dinge: erstens das Produkt, zweitens das Produkt und drittens das Produkt. Der Erfolg eines Automobilunternehmens hängt letztlich an den handelnden Personen, an deren Entschlossenheit und Engagement. Das Entscheidende ist der Mensch. Und die Menschen bei Volkswagen kenne ich nun schon seit über drei Jahrzehnten. Da gibt es ein starkes, gewachsenes Vertrauensverhältnis. So weiß ich, dass Italdesign in guten Händen ist.

## GIORGETTO GIUGIARO

geboren 1938, zählt zu den bedeutendsten italienischen Industriedesignern. 1955 begann er als Designer bei Fiat. Nach Stationen bei Bertone und der Carozzeria Ghia gründete er 1967 ein eigenes Designstudio. Unter dem Markenzeichen „Italdesign Giugiaro“ entwarf er mehr als 200 Fahrzeuge, die in Serienproduktion gingen. „Italdesign“ leitet heute sein Sohn Fabrizio Giugiaro.

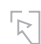

**WEITERE INFORMATIONEN**  
[www.italdesign.it](http://www.italdesign.it)

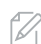

**AUTOR**  
Dirk Maxeiner

A full-page photograph of Giorgio Nardone, an Italian designer, standing next to a bright yellow Volkswagen Beetle. He is wearing a dark grey double-breasted suit, a light blue shirt, and a blue patterned tie. He has grey hair and glasses, and is smiling at the camera. His right hand is in his pocket, and his left hand rests on the hood of the car. The car's front grille and headlight are visible in the foreground. The background shows a modern building with large windows and a cityscape.

„Zu den Menschen bei Volkswagen besteht ein starkes, gewachsenes Vertrauensverhältnis. So weiß ich, dass Italdesign in guten Händen ist.“

GIORGETTO GIUGIARO, ITALDESIGN GIUGIARO



# Der das Lachen bringt.

Raúl Javales hat zwei Gesichter. Als Leiter der Strategischen Planung kümmert er sich bei Volkswagen Financial Services in Brasilien um Strategie, Business Intelligence und Projektmanagement. Nach Feierabend ist er regelmäßig „Dr. Pennebuco Beija-Flor“, der Krankenhaus-Clown.

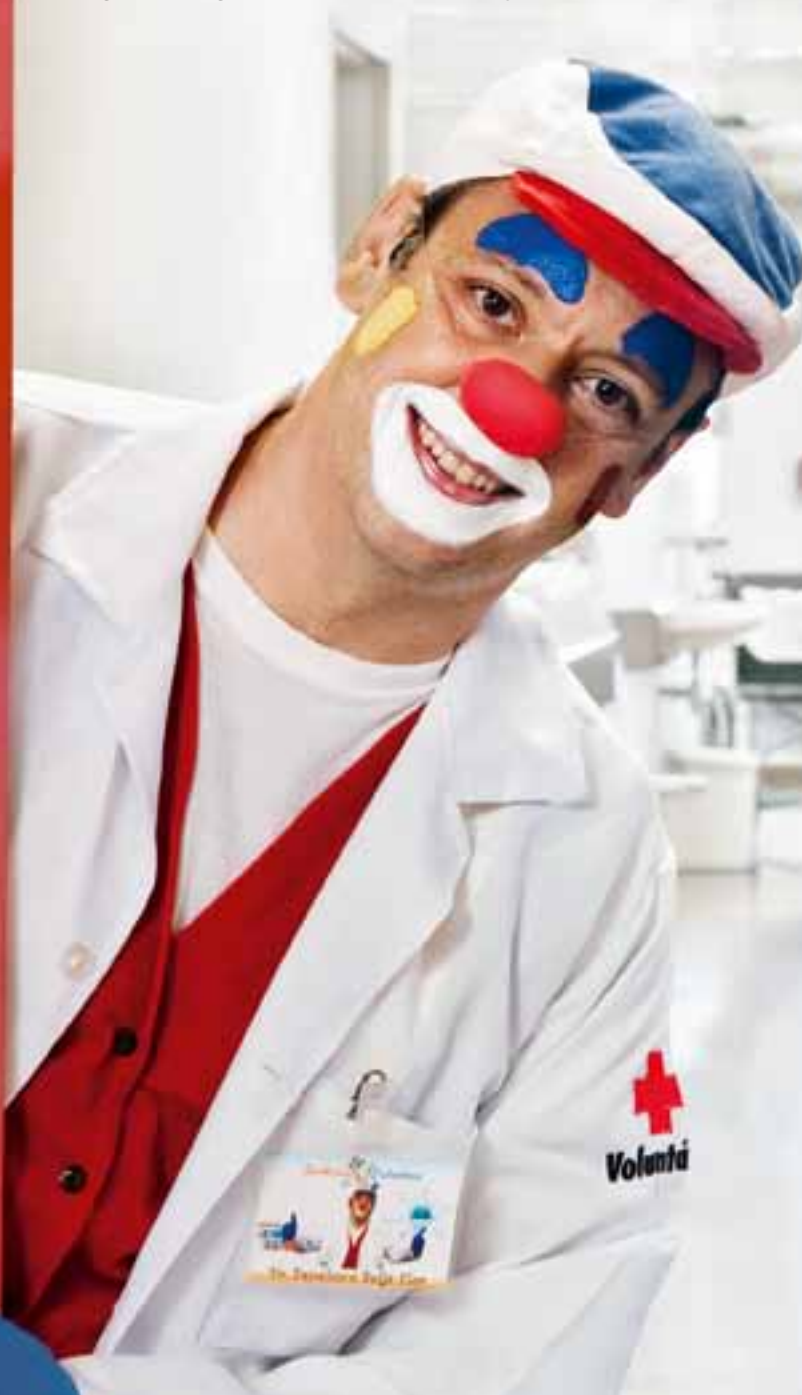

# „Mobilität als umfassende Dienstleistung ist für uns ein echter Wachstumsmarkt.“

RAÚL JAVALES, LEITER STRATEGISCHE PLANUNG VOLKSWAGEN FINANCIAL SERVICES AG BRASILIEN

„Gestatten, Dr. Pennebuco Beija-Flor!“ Raúl Javales trägt einen Arztkittel, das Gesicht ist als Clown geschminkt, sein Name pure Fantasie. „Wie kann ich helfen?“, fragt er eine Patientin. Die entgegnet: „Können Sie mein Gesicht verschönern?“ Dr. Pennebuco Beija-Flor bittet die Dame, die Augen zu schließen, und setzt ihr seine rote Clownsnase auf. „Fertig!“ Herzhaftes Lachen erfüllt das Krankenzimmer.

Zweimal pro Monat ist Raúl Javales im „Hospital das Clínicas“ von São Paulo für einige Stunden Dr. Clown. Ehrenamtlich, im Dienst der Citizen Doctors – mit 1.200 Mitgliedern die größte Initiative von Krankenhaus-Clowns weltweit. Sie verschaffen schwerkranken Menschen und ihren Angehörigen etwas Ablenkung von ihren Sorgen. „Bei vielen dieser Patienten geht es um Leben und Tod – und doch lachen sie“, erzählt Javales und fügt nachdenklich hinzu: „Man kann von ihnen einiges lernen.“ Sein Job ohne Schminke und rote Nase: Leiter der Strategischen Planung bei Volkswagen Financial Services in Brasilien. Das Unternehmen unterstützt sein Ehrenamt, der Blick über den Tellerrand ist gewünscht – daher kann Raúl Javales hin und wieder sogar ein Meeting vorzeitig verlassen, wenn die Patienten im Krankenhaus auf ihren Dr. Pennebuco Beija-Flor warten.

## EINE LOTTERIE, BEI DER ALLE GEWINNEN

Für die Arbeit als Dr. Clown ließ sich Raúl Javales mehrere Monate lang ausbilden. Etwas mit vollem Einsatz zu tun, zählt für ihn im Privaten wie im Job. Dass Volkswagen Financial Services in Brasilien als der am stärksten spezialisierte Fahrzeugfinanzierer gilt, erzählt Javales stolz und selbstbewusst. „Wir sind auf permanentem Wachstumskurs und verfügen dabei über das größte Know-how rund um die automobilen Finanzdienstleistung.“

Der Marktanteil des Volkswagen Konzerns liegt in Brasilien bei mehr als 20 Prozent. Die Produkte des Finanzdienstleistungsbereichs sind in diesem Wachstumsmarkt wichtige Inst-

umente der Absatzförderung – zum Beispiel der „Consortio“. „Consortio ist eines der typischsten und attraktivsten Finanzprodukte in Brasilien“, erklärt Javales. Beim Consortio verpflichten sich Privatpersonen als Gruppe, gemeinsam auf neue Autos zu sparen. Modelle und Preise werden bei Vertragsabschluss festgelegt, Volkswagen Financial Services sichert das Vorhaben gegen etwaige Inflationsrisiken ab. Wann die Teilnehmer ihr Auto jeweils erhalten, entscheidet die Glücksfee: Jeden Monat werden zwei Pkw verlost. Bei 100 Teilnehmern bedeutet dies im Höchstfall 50 Monate sparen. Spätestens dann steht das neue Auto vor der Tür. Seit 1976 wurden über diese in ganz Südamerika sehr populäre Auto-Lotterie schon mehr als 500.000 Volkswagen Modelle finanziert.

Raúl Javales hält den Consortio für eine ideale Art der Gemeinschaftsfinanzierung – auch für andere Wachstumsmärkte. Ein Transfer des Modells, etwa nach Russland, China oder Indien, wird bei Volkswagen Financial Services bereits diskutiert. Im Gegenzug arbeitet Raúl Javales daran, ein in Europa etabliertes Geschäftsfeld in seine Heimat zu „importieren“: das Flottenmanagement. Bislang werden Fuhrparks in Südamerika von großen Leasingfirmen nur zur Verfügung gestellt, aber nicht gemanagt. „Wenn wir brasilianischen Unternehmen Mobilität als umfassende Dienstleistung anbieten, ist das für uns ein echter Wachstumsmarkt“, ist Javales überzeugt.

Bei all diesen Zukunftsprojekten hält Raúl Javales die Fäden in der Hand. Sein Terminkalender ist randvoll. Zweimal im Monat wird er dennoch weiterhin ins „Hospital das Clínicas“ fahren, damit die Patienten nicht zu lange auf ihren Dr. Clown warten müssen.

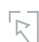

## WEITERE INFORMATIONEN

[www.vwfsag.de](http://www.vwfsag.de) > Internationale Standorte

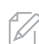

## AUTOR

Dirk Böttcher



Mit  
Schwung  
in die  
Zukunft.



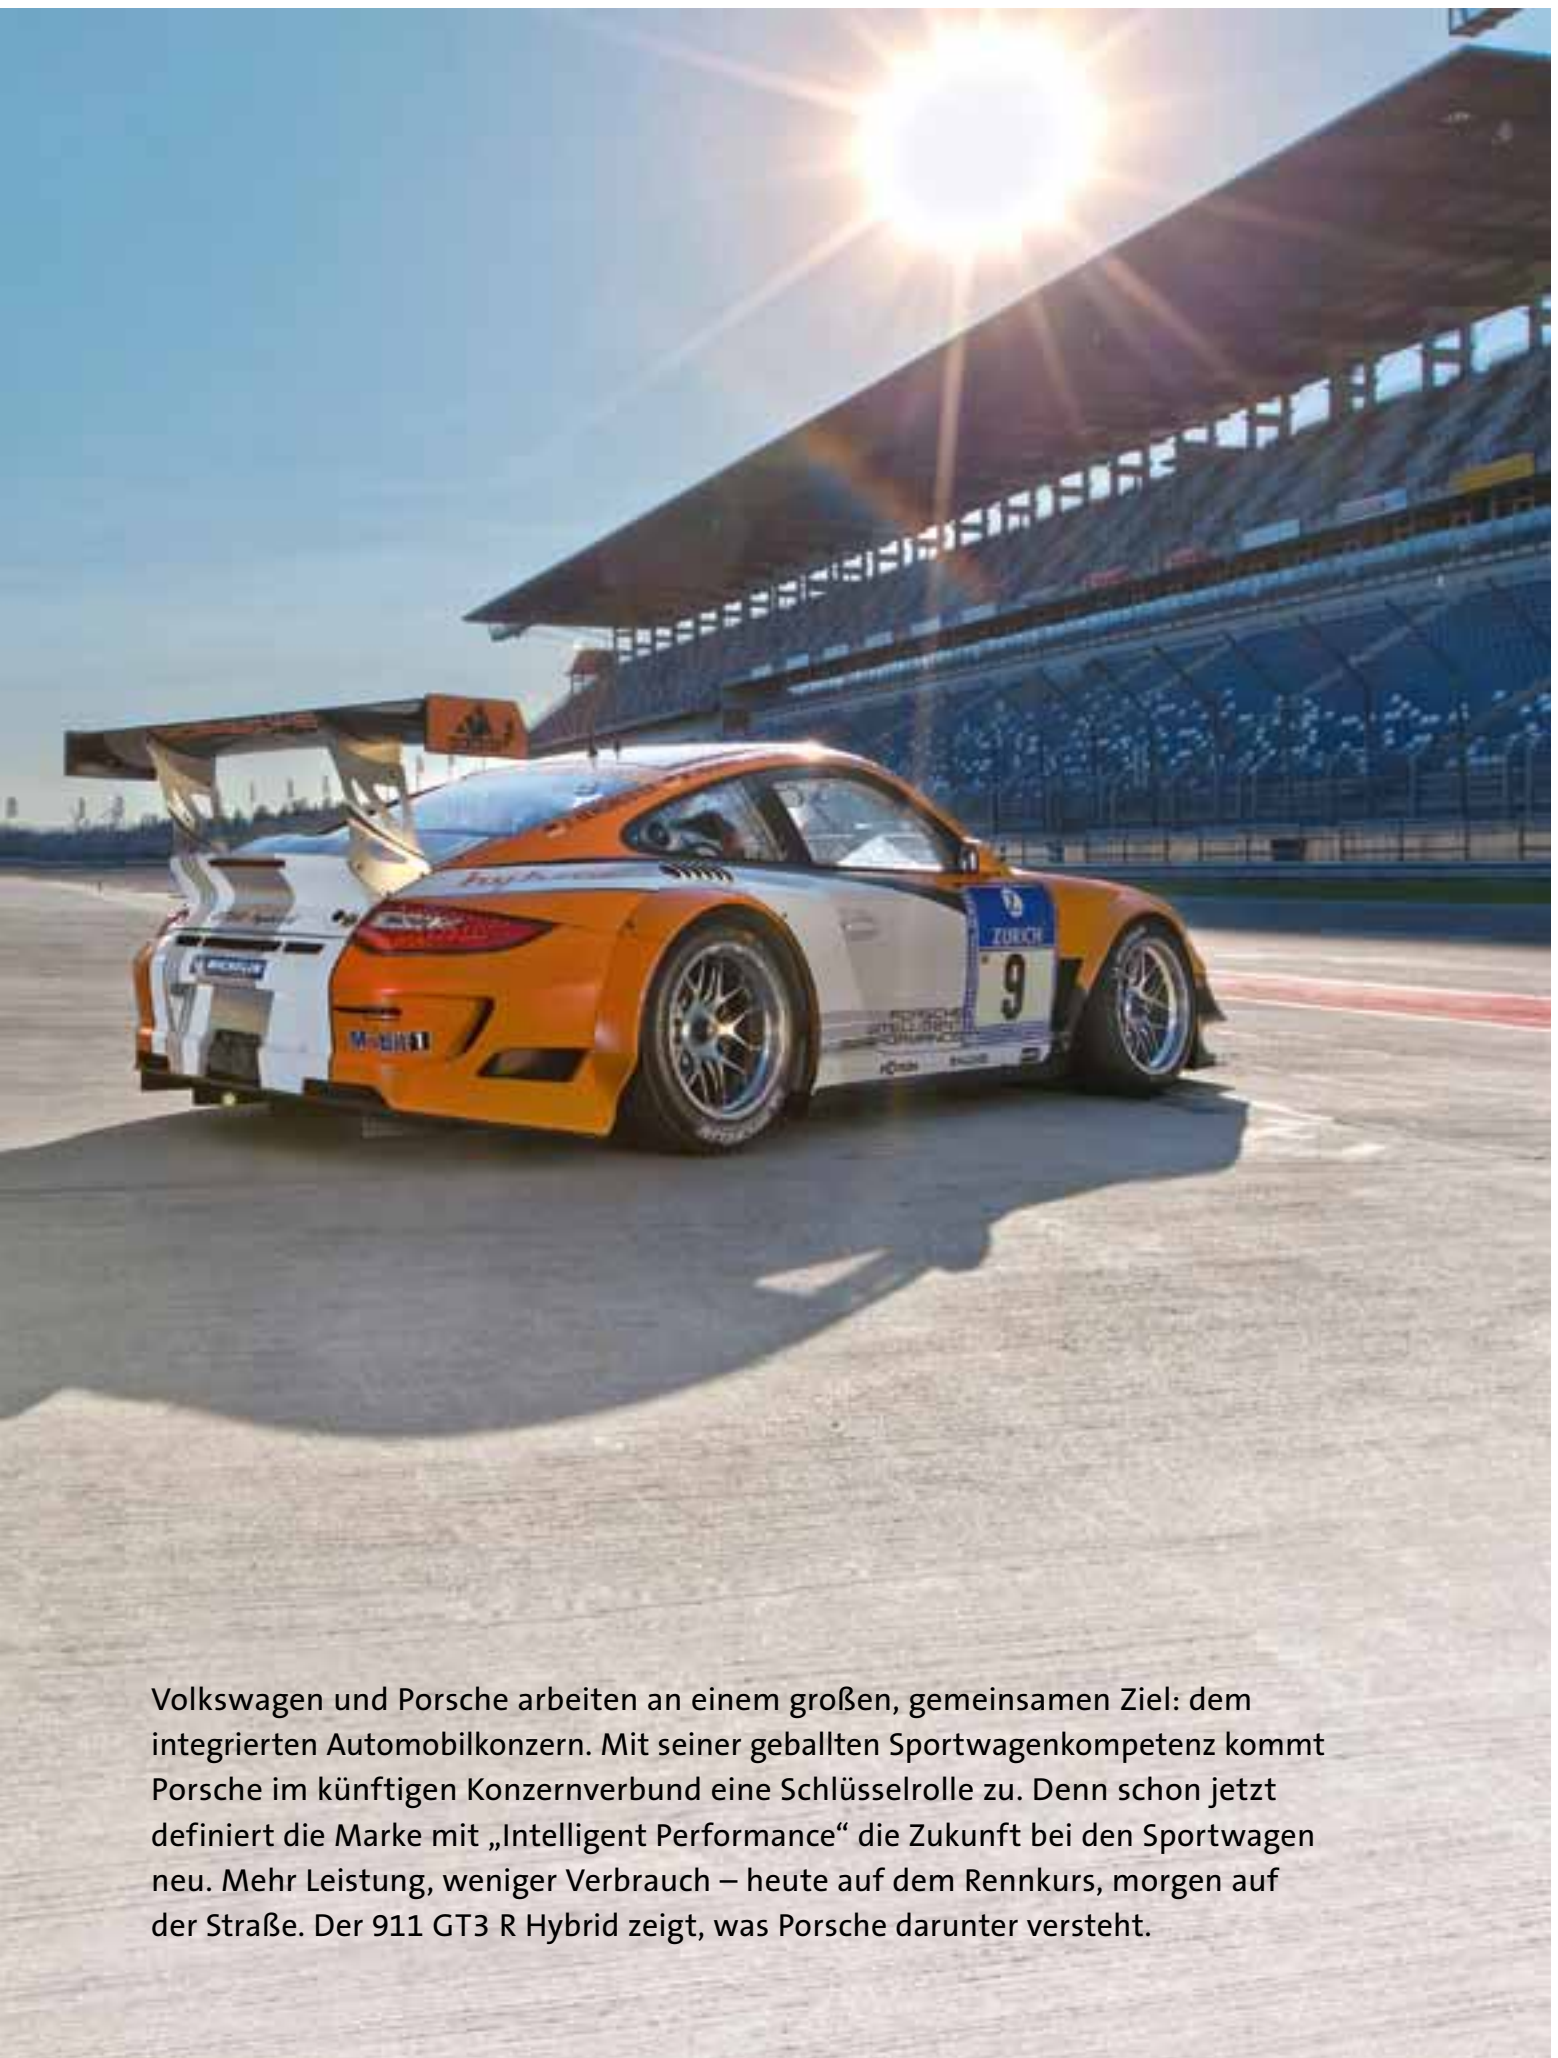

Volkswagen und Porsche arbeiten an einem großen, gemeinsamen Ziel: dem integrierten Automobilkonzern. Mit seiner geballten Sportwagenkompetenz kommt Porsche im künftigen Konzernverbund eine Schlüsselrolle zu. Denn schon jetzt definiert die Marke mit „Intelligent Performance“ die Zukunft bei den Sportwagen neu. Mehr Leistung, weniger Verbrauch – heute auf dem Rennkurs, morgen auf der Straße. Der 911 GT3 R Hybrid zeigt, was Porsche darunter versteht.

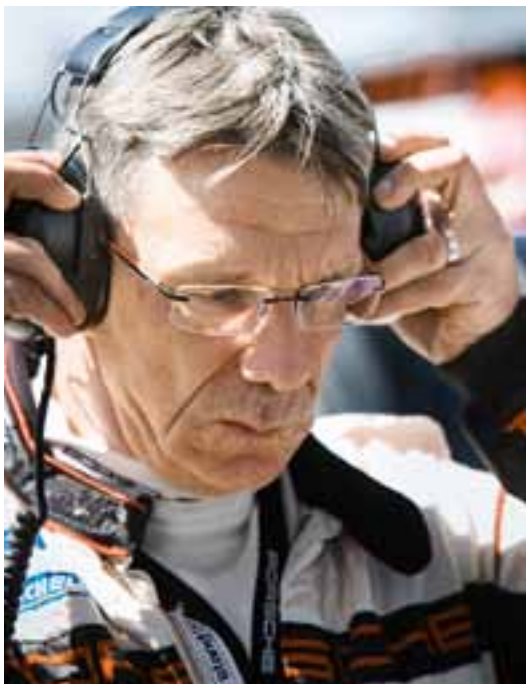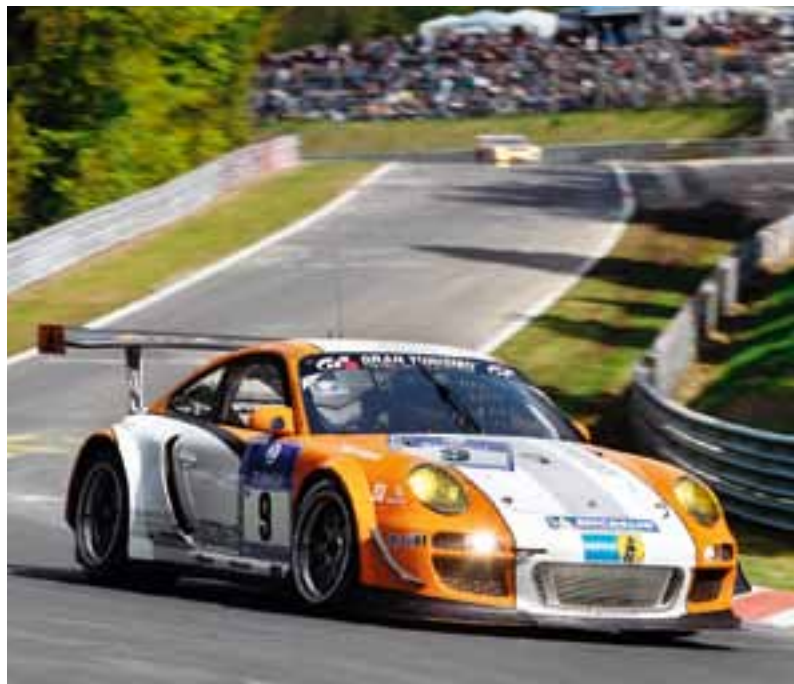

## „Wir erproben zukunftsweisende Hybridtechnik – unter den Extrembedingungen des Rennsports.“

HARTMUT KRISTEN, MOTORSPORT-CHEF PORSCHE

Er sieht aus wie ein Rennwagen, er fährt wie ein Rennwagen, er hört sich an wie ein Rennwagen. Und doch ist der weiß-orangefarbene 911 ein ganz besonderes Fahrzeug – eines mit drei Motoren: ein 353 kW (480 PS) starker Sechszylinder-Rennmotor im Heck und zwei je 60 kW (82 PS) starke Elektromotoren an der Vorderachse. Das Dekor des Hybrid-Elfers signalisiert: Hochspannung – im wahrsten Sinne des Wortes. „Orange ist auch die Farbe der Hochvoltkabel, über die die Elektromotoren im 911 GT3 R Hybrid gespeist werden“, erklärt Porsche Motorsportchef Hartmut Kristen das Farbdesign. Er ist stolz auf das, was seine Mannschaft in nur elf Monaten Entwicklungszeit auf die Räder gestellt hat: ein Hybrid-Rennsportfahrzeug, das einzigartig ist.

### SPARMEISTER SEINER KLASSE

Nach dem 24-Stunden-Rennen am Nürburgring und dem „Petit Le Mans“ in Road Atlanta über 1.000 Meilen beendete der 911 GT3 R Hybrid seine erste Rennsaison Anfang November mit dem 1.000-Kilometer-Rennen im chinesischen Zhuhai – und verblüffte die Konkurrenz: Der Hybrid-Sportler, der in der Sonderklasse GTH (Grand Touring Hybrid) startete, musste dank des zukunftsweisenden Antriebskonzepts einen Boxenstopp weniger einlegen als der nächstplatzierte GT-Konkurrent. Die Porsche Werksfahrer Patrick Long und Jörg Bergmeister schwärmen: „Wir hatten das effizienteste und gleichzeitig das schnellste GT-Auto. Das ist ‚Porsche Intelligent Performance‘.“

### RENNSPORT ALS WEGBEREITER

Exakt 110 Jahre nachdem Ferdinand Porsche das erste Fahrzeug mit Hybrid-Antrieb, den Lohner Porsche Semper Vivus, entwickelt hat, greift der Sportwagenhersteller dieses visionäre Antriebskonzept im seriennahen GT-Rennsport wieder auf – und beginnt so ein neues Kapitel in der überaus erfolgreichen Geschichte des 911, der in 45 Jahren mehr als 20.000 Siege einfuhr. Der Rennsport ist bei Porsche Wegbereiter für die Hybridtechnologie, die künftig in allen Baureihen zum Einsatz kommen soll. „Mit der Hybridversion des Cayenne, dem 911 GT3 R Hybrid und der Konzeptstudie 918 Spyder zeigen wir, was beim Bau sportlicher Fahrzeuge mit moderner Hybridtechnologie in Zukunft machbar sein wird: Spitzenleistungen bei extrem niedrigem Verbrauch“, so Porsche Chef Matthias Müller.

Spätestens wenn es um den elektrischen Vorderradantrieb geht, der im 911 GT3 R Hybrid Premiere feiert, geraten Fahrdynamik-Ingenieure ins Schwärmen: Während sich die Vorderräder zur Optimierung der Traktionskontrolle bisher schon einzeln abbremsten ließen, können sie nun auch getrennt voneinander beschleunigt werden. Das verhindert ein Übersteuern des Fahrzeugs und damit das Ausbrechen des Hecks. In Serie gehen wird diese Antriebstechnologie voraussichtlich 2013 im Porsche 918 Spyder in Kombination mit der Plug-in-Batterietechnologie.



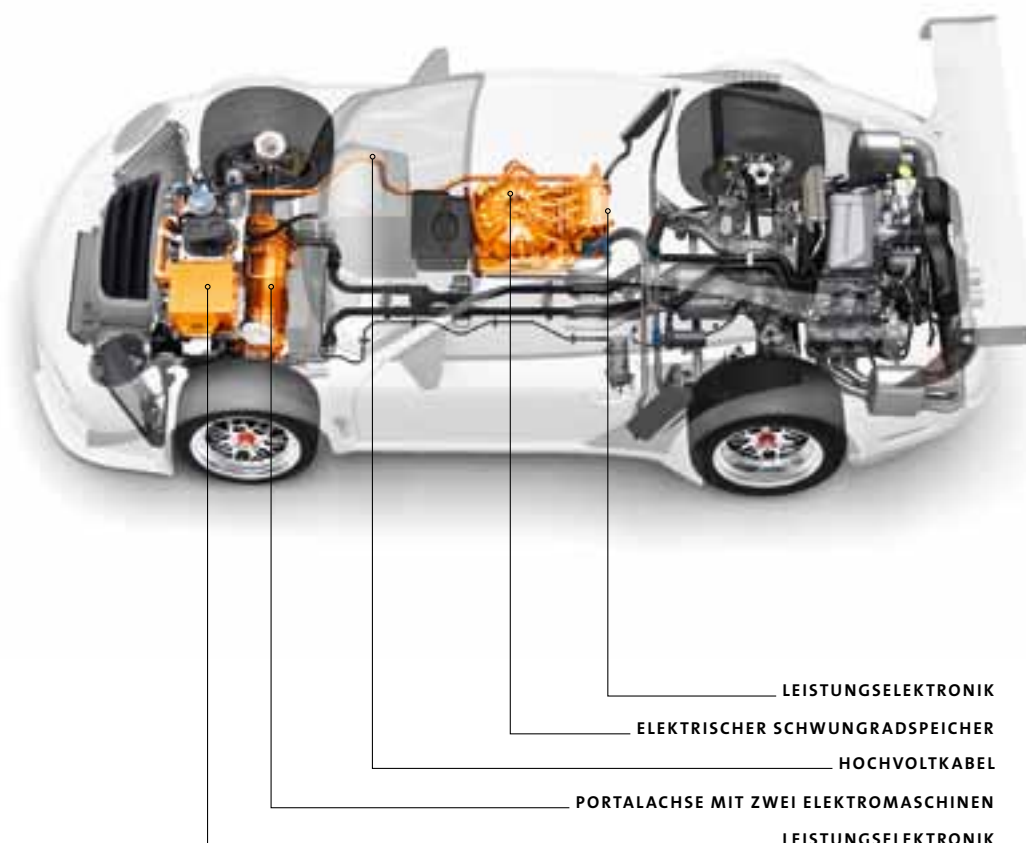

#### MEHR EFFIZIENZ MIT WENIGER VERBRAUCH –

Porsche bekennt sich seit längerem zur Elektromobilität und damit zur Schonung von Umwelt und Ressourcen. Der Anspruch: „Porsche Intelligent Performance“ dank höherer Effizienz bei geringerem Verbrauch. Speziell für den Renneinsatz ist das Hybridsystem des 911 GT3 R Hybrid entwickelt worden. Die elektrisch angetriebene Vorderachse, die ohne Differenzialsperre auskommt, wird spätestens 2013 in Serie gehen.

Das neuartige Hybridsystem mit Schwungradspeicher im 911 GT3 R Hybrid wurde speziell für den Renneinsatz entwickelt. Deshalb ist es auch für den 918 RSR vorgesehen, der Rennsportvariante des 918 Spyder, die erstmals auf der Detroit Motor Show im Januar 2011 vorgestellt wurde. Das System arbeitet als Energiespeicher für die beiden Elektromotoren an der Vorderachse. Das Schwungrad kann, was Batterien nicht können: Es nimmt in Sekundenbruchteilen Energie auf und gibt sie blitzschnell wieder ab. Das Auf- und Entladen von Batterien dagegen geschieht auf Basis chemischer Prozesse – und die brauchen Zeit. Der effizientere Schwungradspeicher ist eine Maschine, deren Rotor sich bis zu 40.000 Mal pro Minute um die eigene Achse dreht und die so gewonnene Energie mechanisch speichert. Bremsst der Rotor ab, wird die Energie zurückgewonnen. Ein weiterer Vorteil: Über die Boost-Wippe kann der Fahrer ein Extra an Antriebskraft aus dem Schwungrad abrufen, wodurch der Hybrid-Elfer kurzfristig zehn Stundenkilometer mehr auf den Asphalt bringt. Der einzige Wermutstropfen: Die Schwungradtechnologie eignet sich heute noch nicht für den täglichen Straßenverkehr. Denn nur, wenn oft und stark gebremst wird, erhält der Rotor ausreichend Schwung.

Motorsportchef Hartmut Kristen nennt den hybriden Rennwagen gern „race lab“, „rollendes Versuchslabor“. Es zeige eindrucksvoll, welches Potenzial in der Hybridtechnologie steckt:

„Was heute im Rennsport Wirklichkeit ist, wird bald auch im Alltag auf der Straße normal sein.“ Das Motorsportteam arbeitet dafür eng mit den Kollegen im Weissacher Forschungs- und Entwicklungszentrum zusammen, das demnächst ausgebaut wird. 150 Millionen Euro investiert Porsche unter anderem in einen Hightech-Windkanal, ein neues Designzentrum und in ein zukunftsweisendes Elektronikintegrationszentrum. 100 Ingenieure werden dafür neu eingestellt.

#### KLEINSERIE IM VISIER

Kristen ist begeistert von dem enormen Wissenszuwachs in so kurzer Zeit. Der nächste Schritt ist nun, die Hybridtechnologie für Kleinstserien fit zu machen, zum Beispiel für den Einsatz in einer der insgesamt 19 Porsche eigenen Rennserien. Bis dahin werden die beiden existierenden Exemplare des 911 GT3 R Hybrid aber noch so manche Rennrunde drehen, so auch beim 24-Stunden-Rennen am Nürburgring Ende Juni 2011. Das Porsche Team setzt auf Sieg.

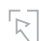

**WEITERE INFORMATIONEN**  
[www.porsche.com](http://www.porsche.com) > Germany

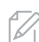

**AUTORIN**  
Tina Rumpelt



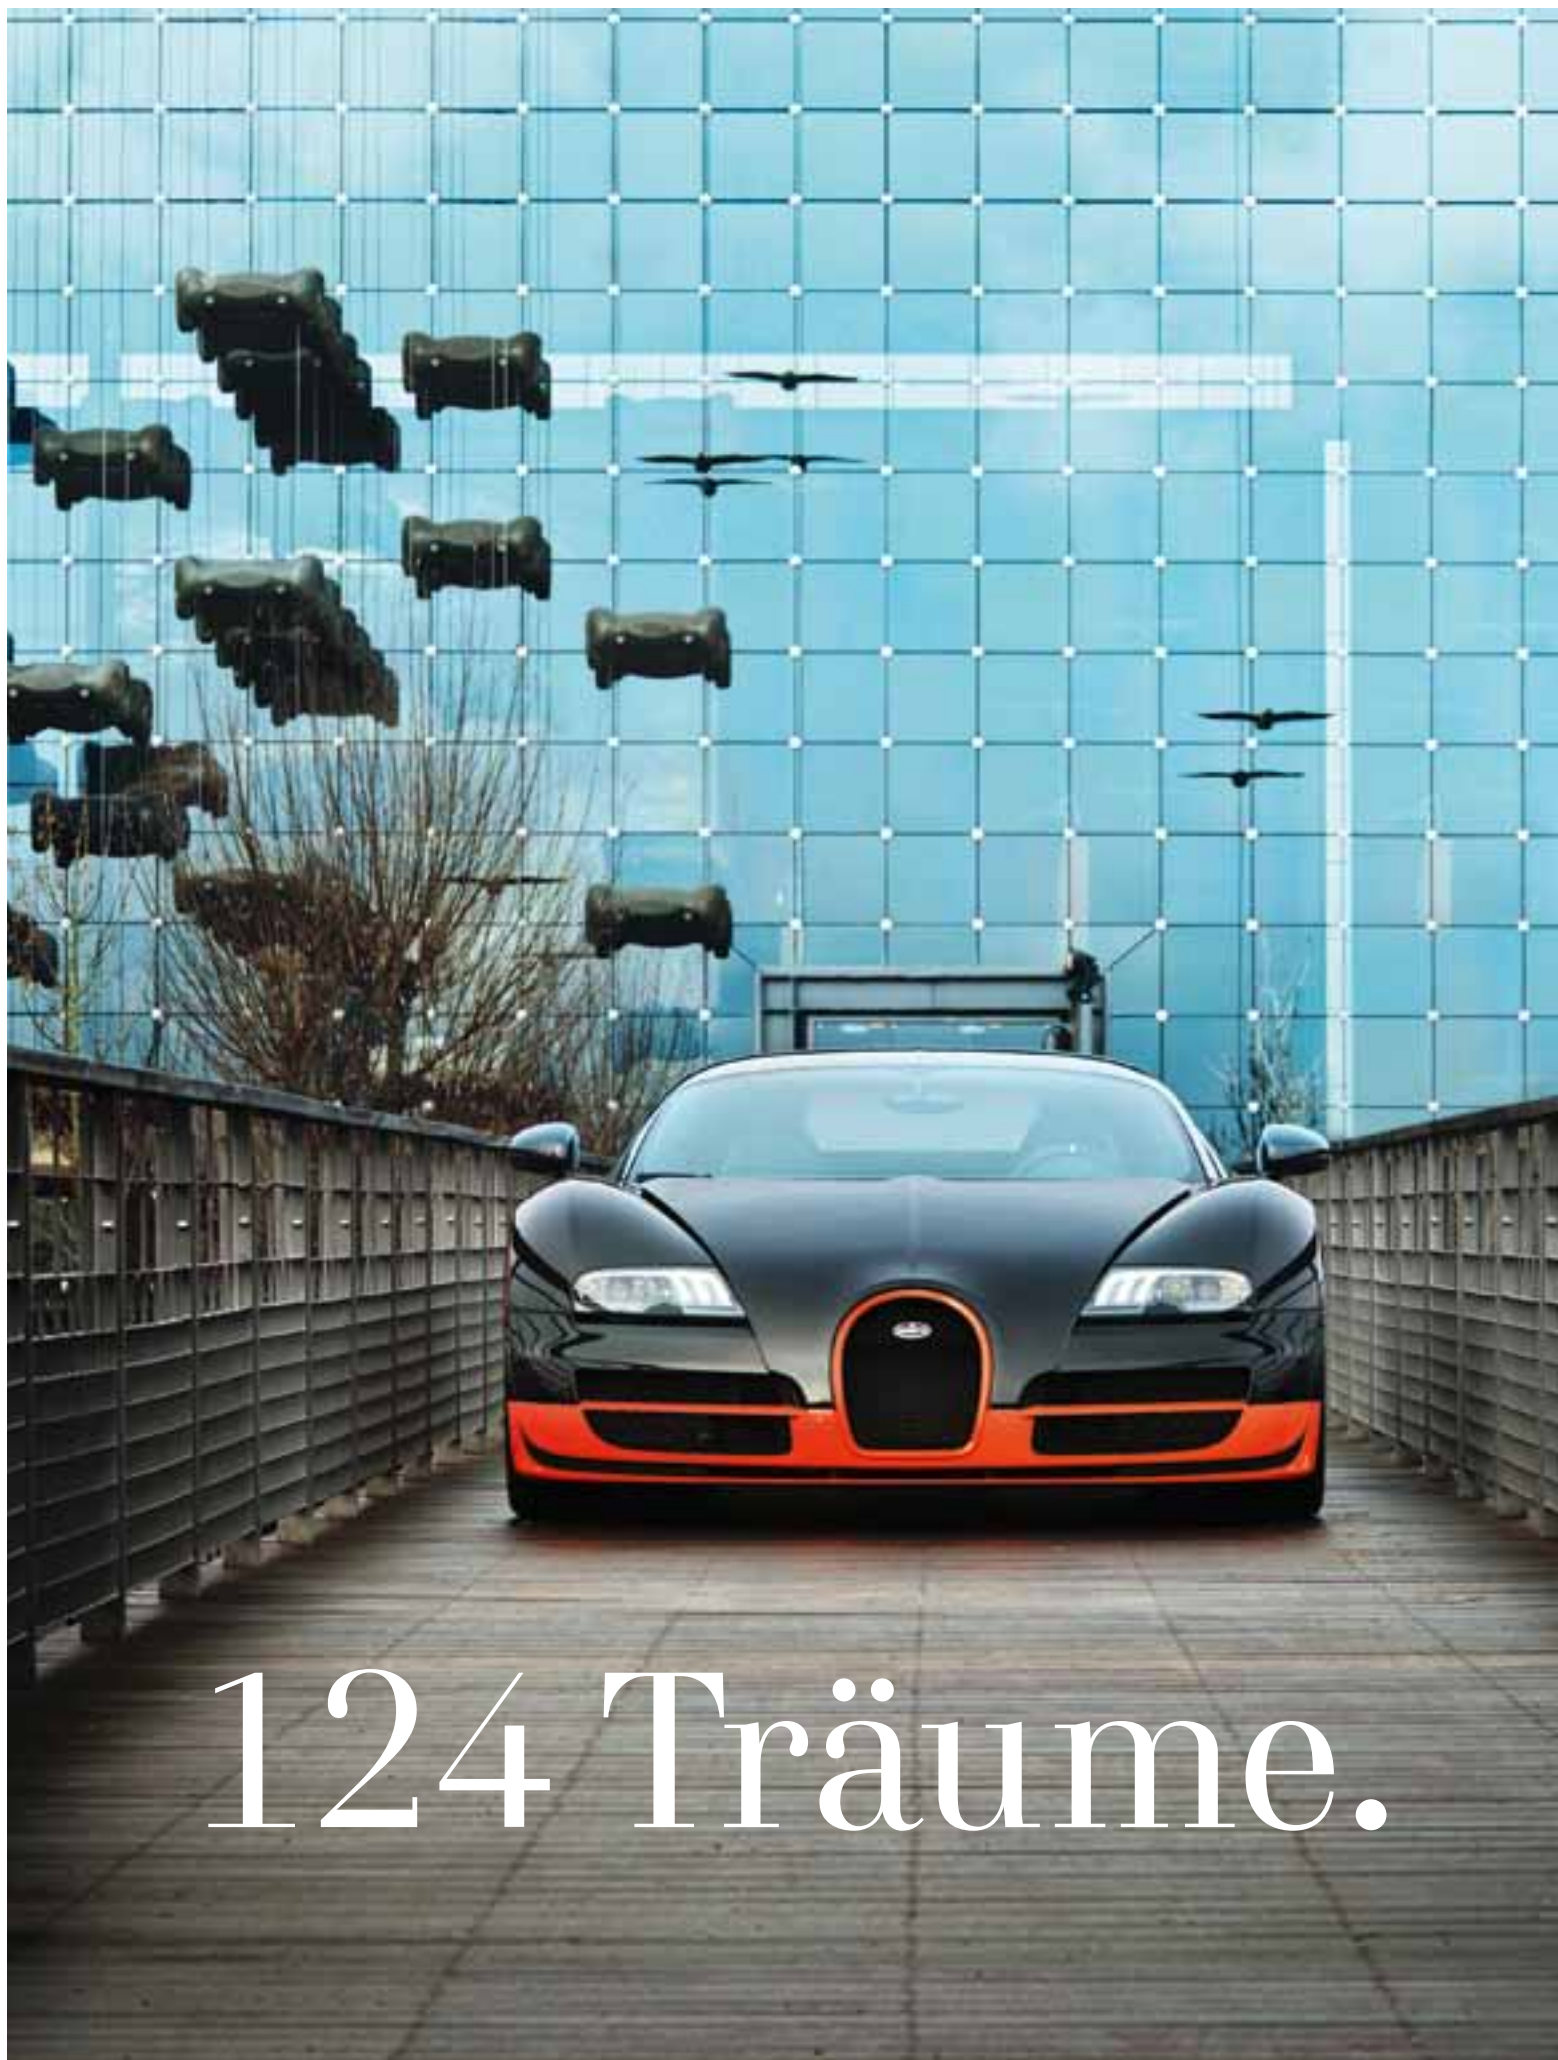

124 Träume.



Tradition verpflichtet:  
Mit dem Bugatti Veyron  
belebte Volkswagen die  
berühmte Sportwagenmarke  
wieder und interpretiert Auto-  
mobilhistorie in visionärer Art  
neu. Der „Neue“ zu Besuch  
in der Cité de l'Automobile im  
elsässischen Mulhouse, wo  
die weltweit größte Bugatti  
Sammlung zu sehen ist:  
123 exklusive Raritäten aus  
der Ära Ettore Bugattis.

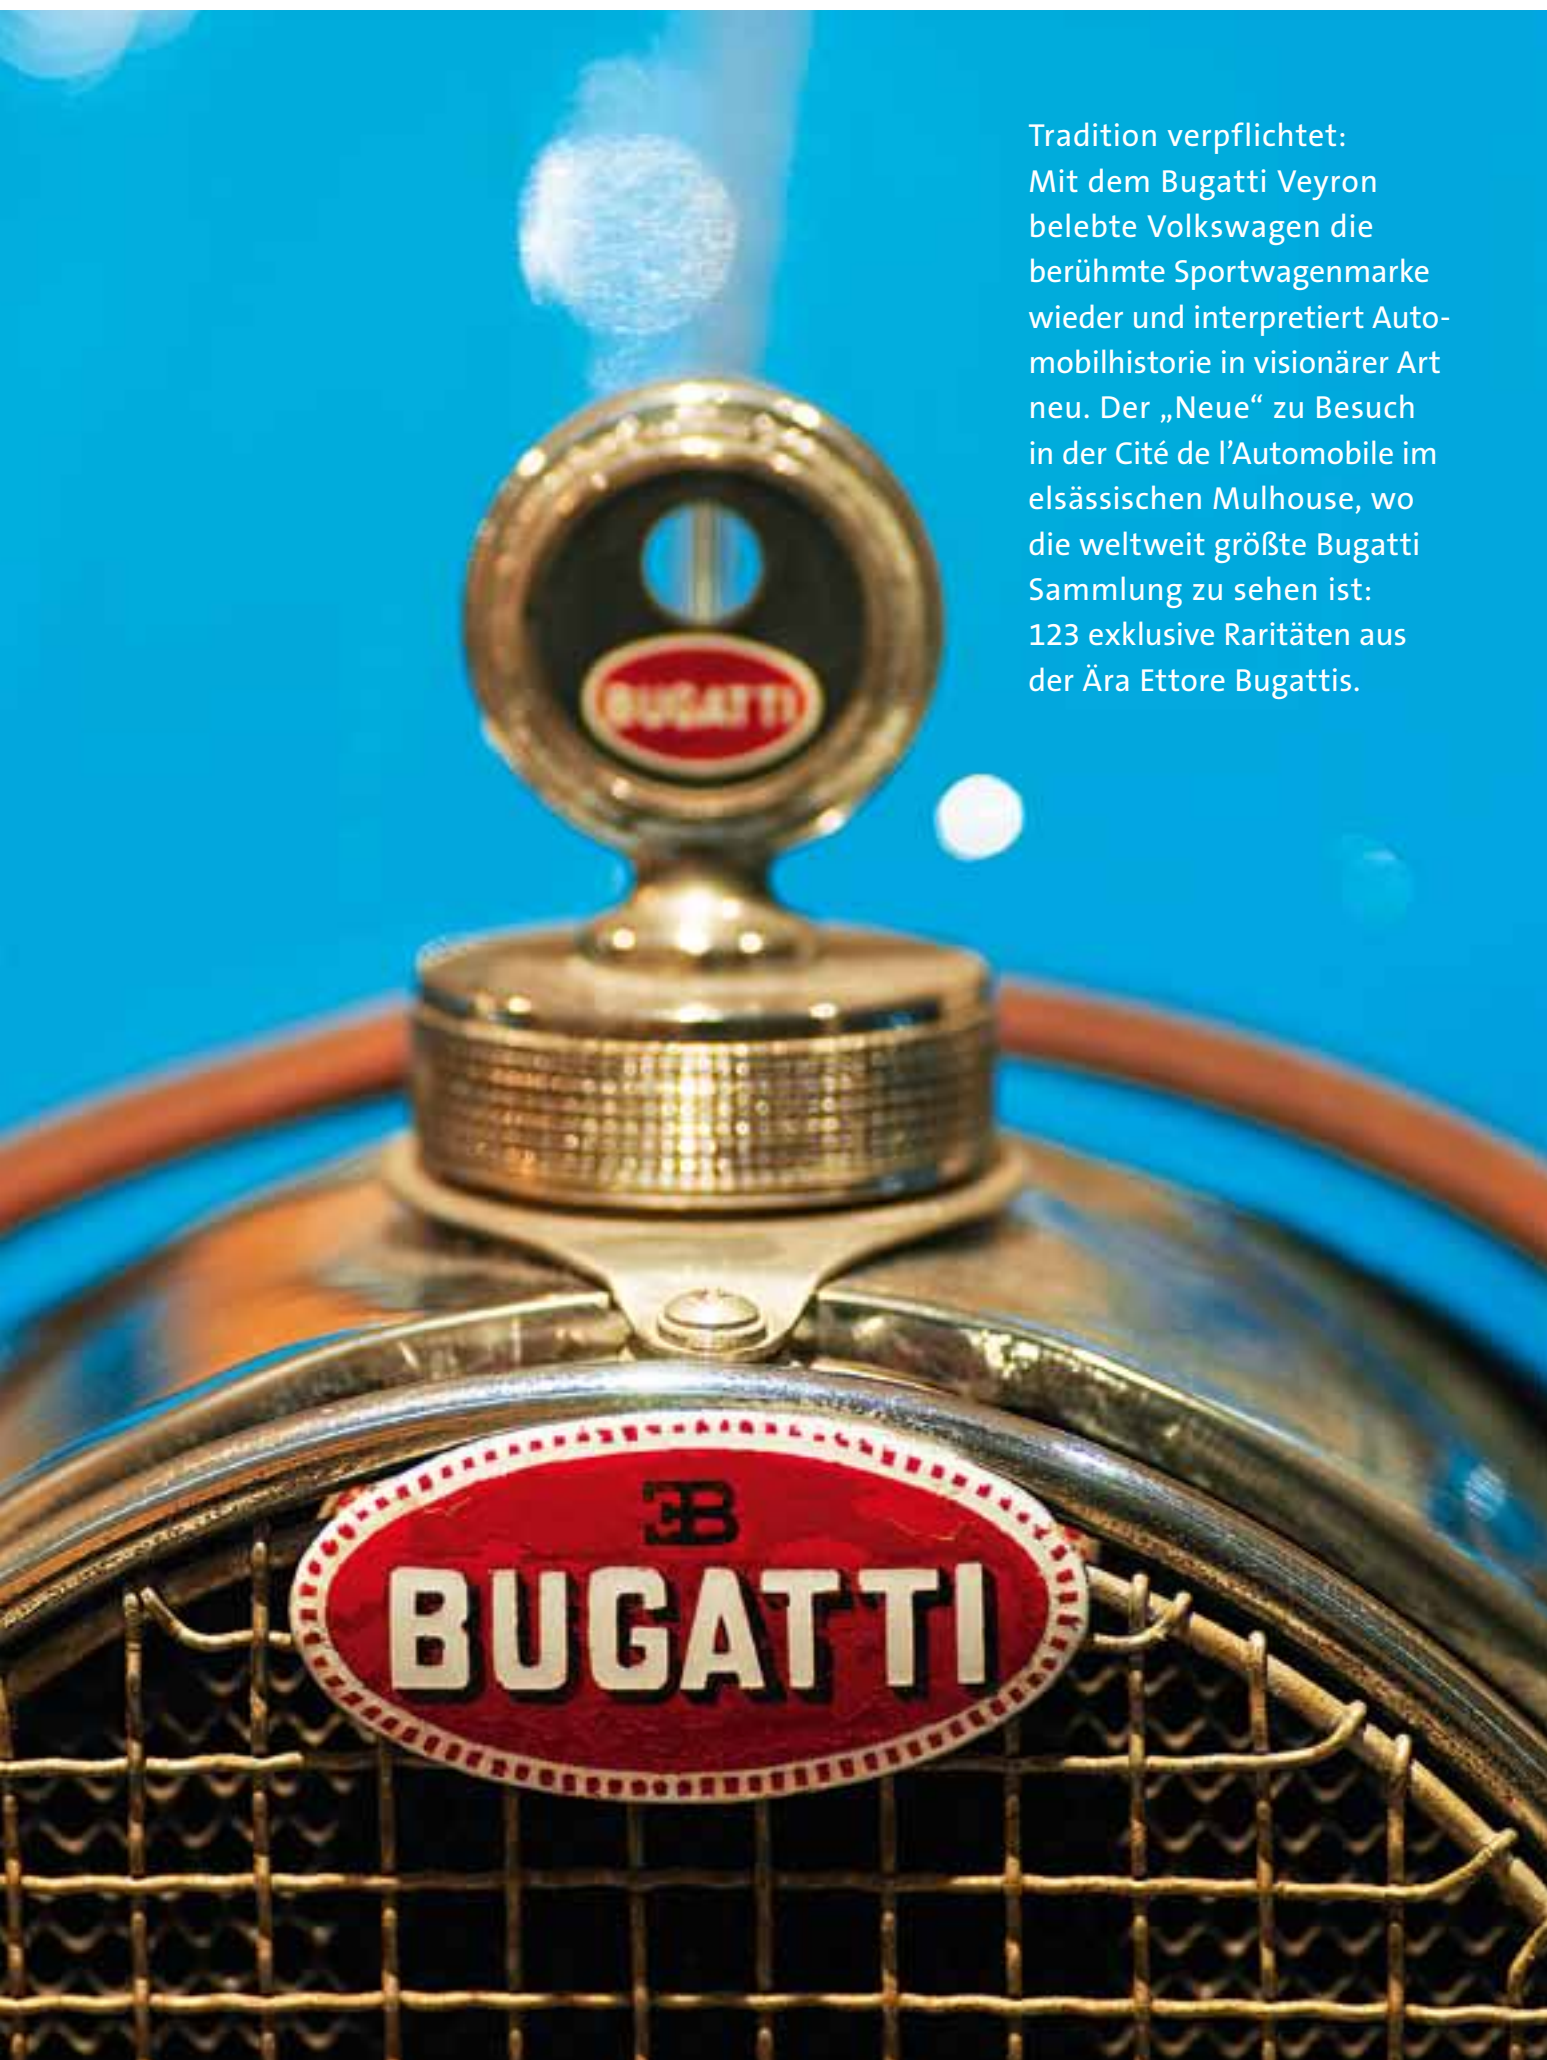



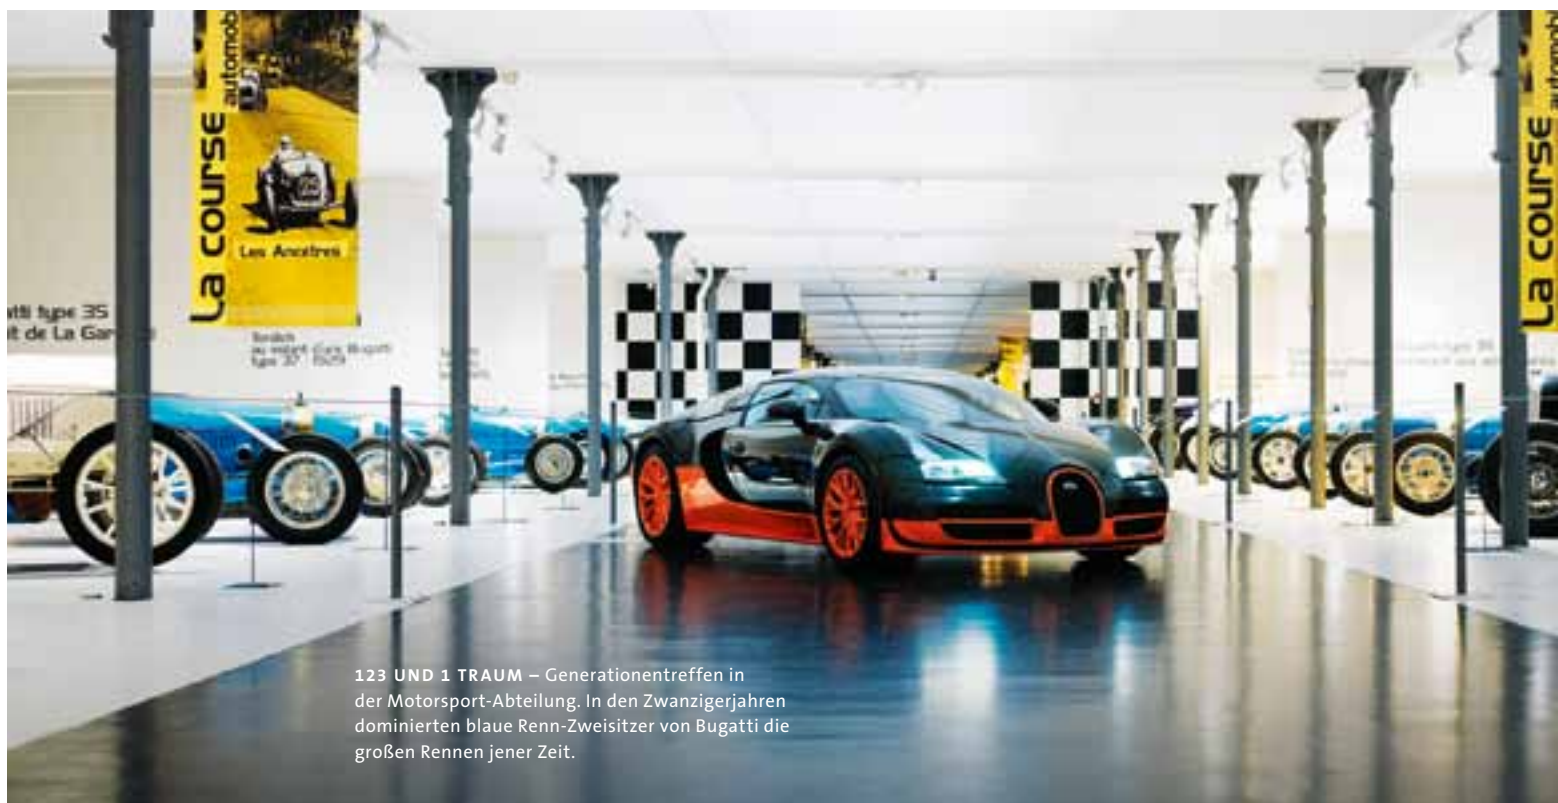

**123 UND 1 TRAUM** – Generationentreffen in der Motorsport-Abteilung. In den Zwanzigerjahren dominierten blaue Renn-Zweisitzer von Bugatti die großen Rennen jener Zeit.

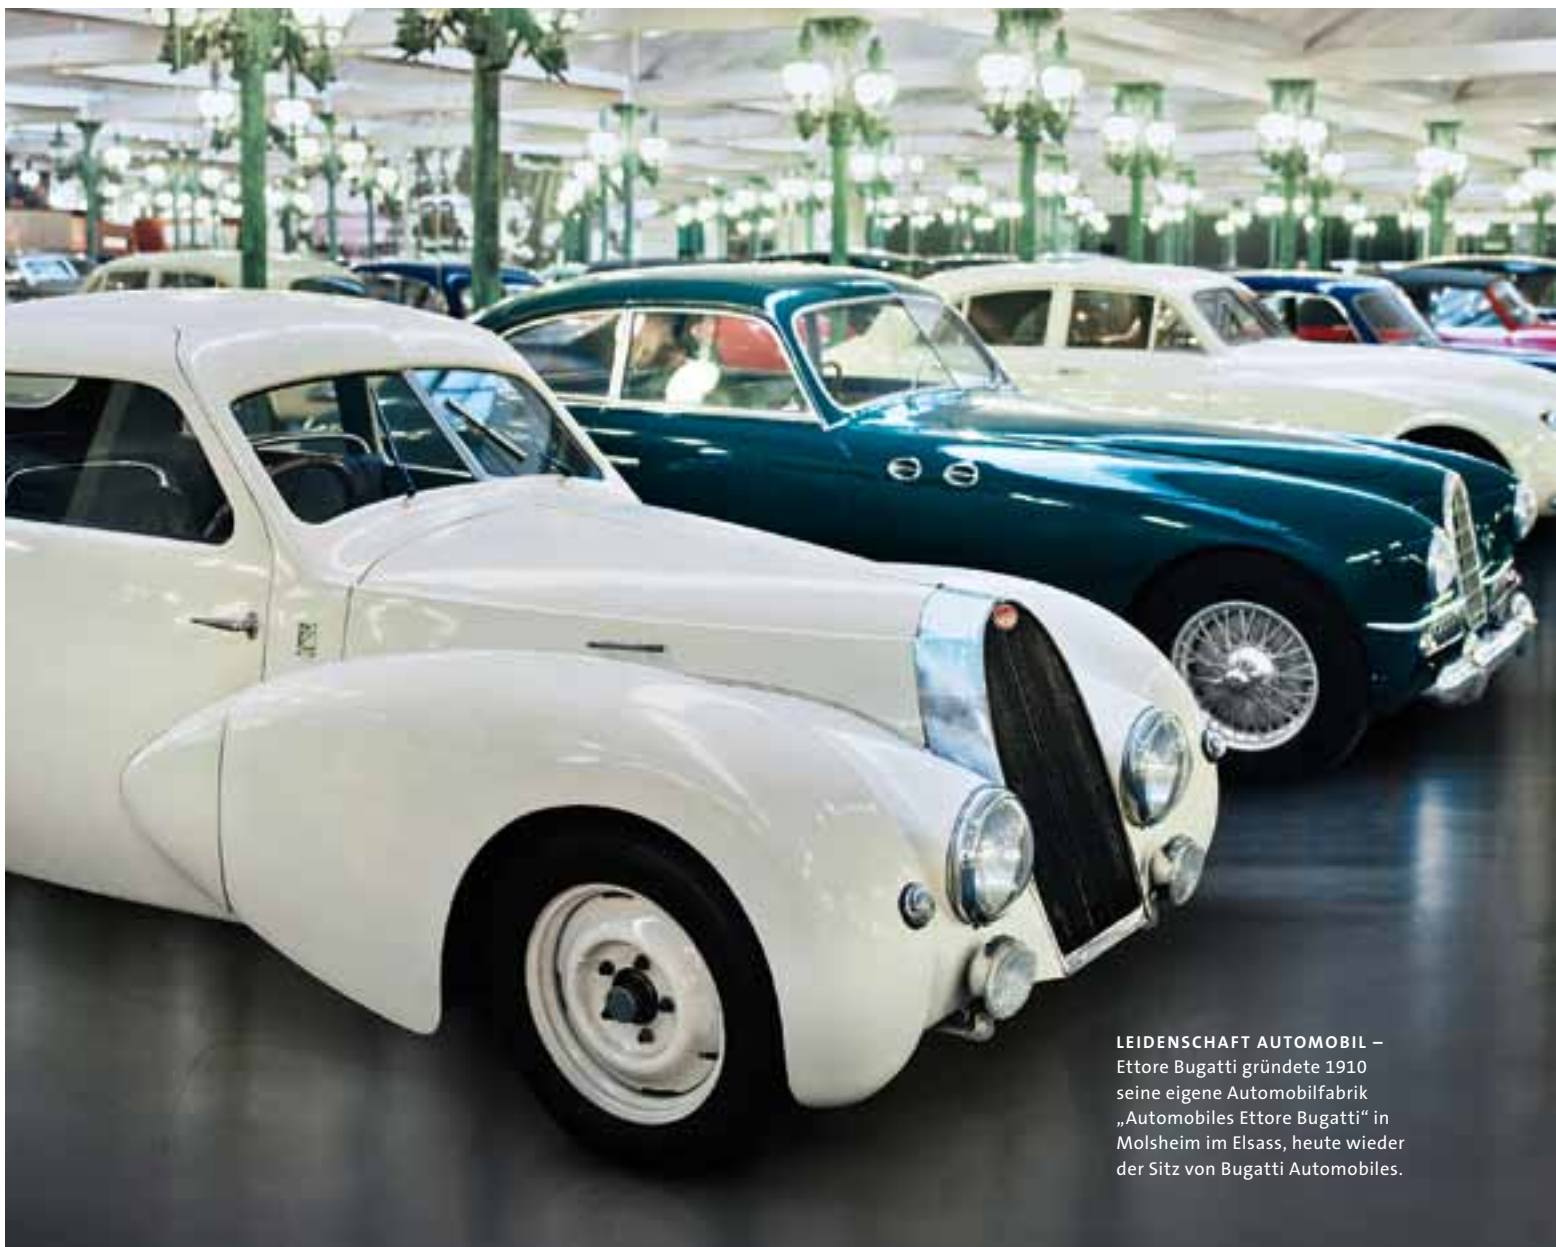

**LEIDENSCHAFT AUTOMOBIL** – Ettore Bugatti gründete 1910 seine eigene Automobilfabrik „Automobiles Ettore Bugatti“ in Molsheim im Elsass, heute wieder der Sitz von Bugatti Automobiles.



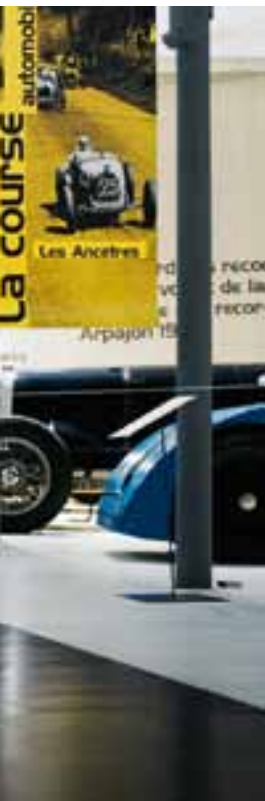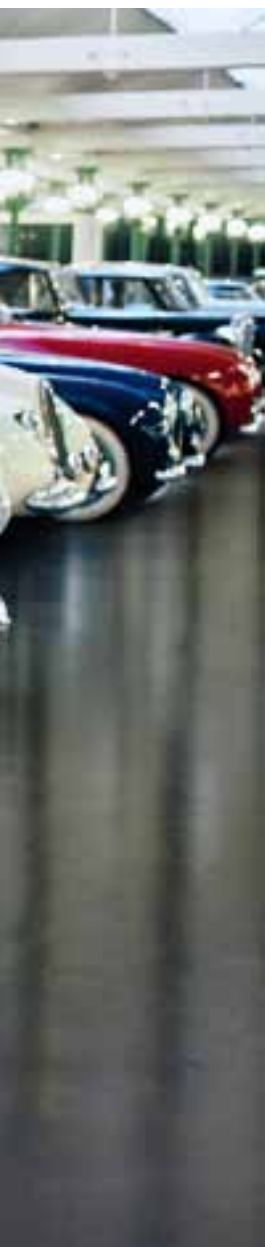

#### ABENTEUER AUTOMOBIL –

Bugatti Royale Park Ward von 1933, drei Tonnen schwer, sechs Meter lang, 12,8-Liter-V8-Motor, 300 PS stark und 160 km/h schnell. Der Bugatti „Royale“ war das luxuriöseste und teuerste Auto seiner Zeit. Nur sechs „königliche“ Bugatti wurden gebaut.

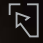

#### WEITERE INFORMATIONEN

[www.collection-schlumpf.com](http://www.collection-schlumpf.com) > deutsch  
[www.bugatti.com](http://www.bugatti.com) > deutsch

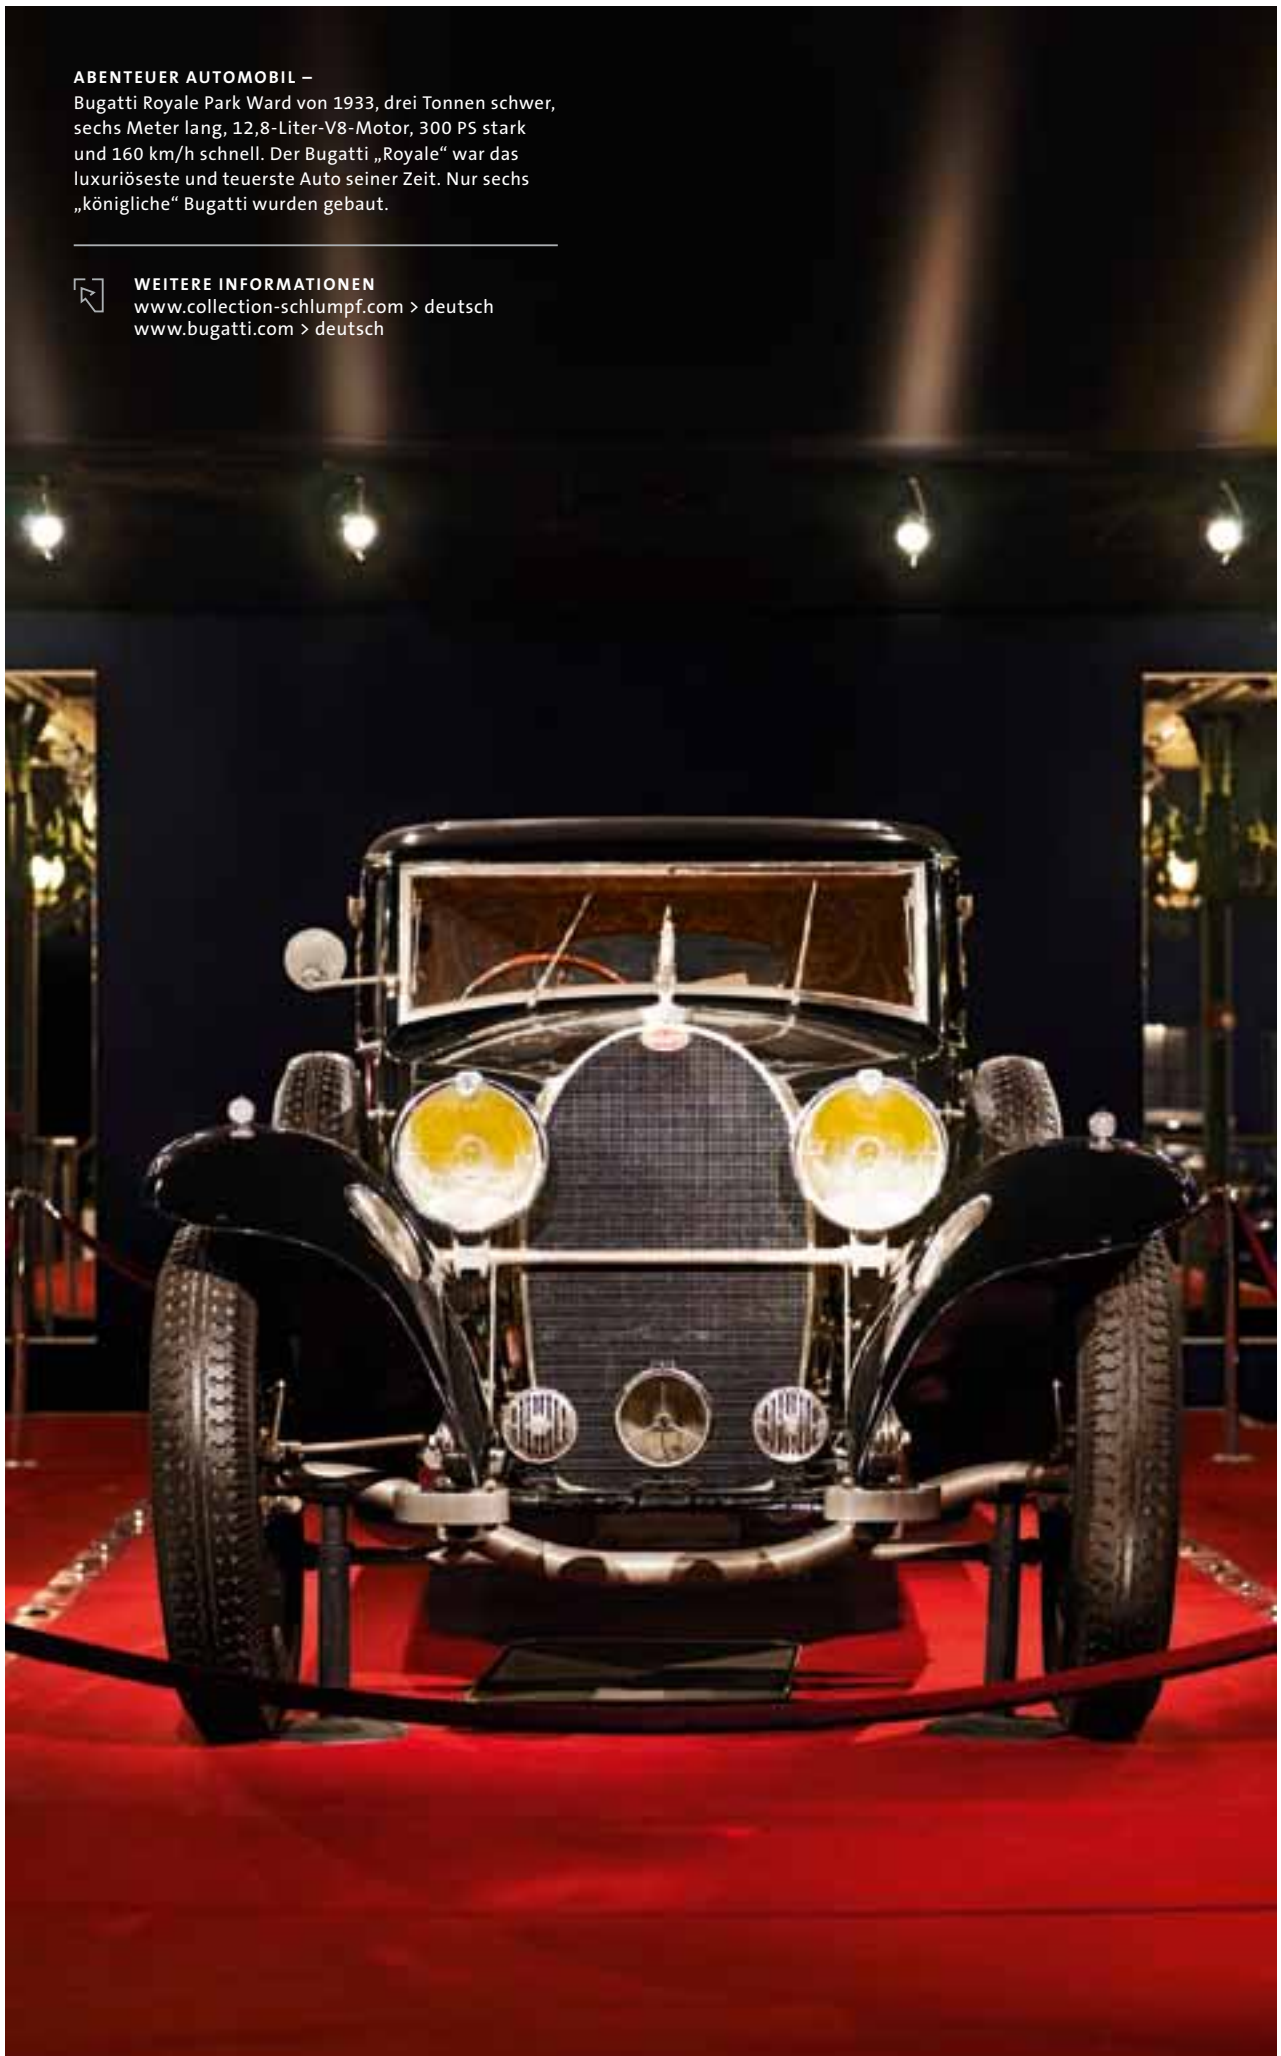

ESSAY

# Bewegung ist Leben.

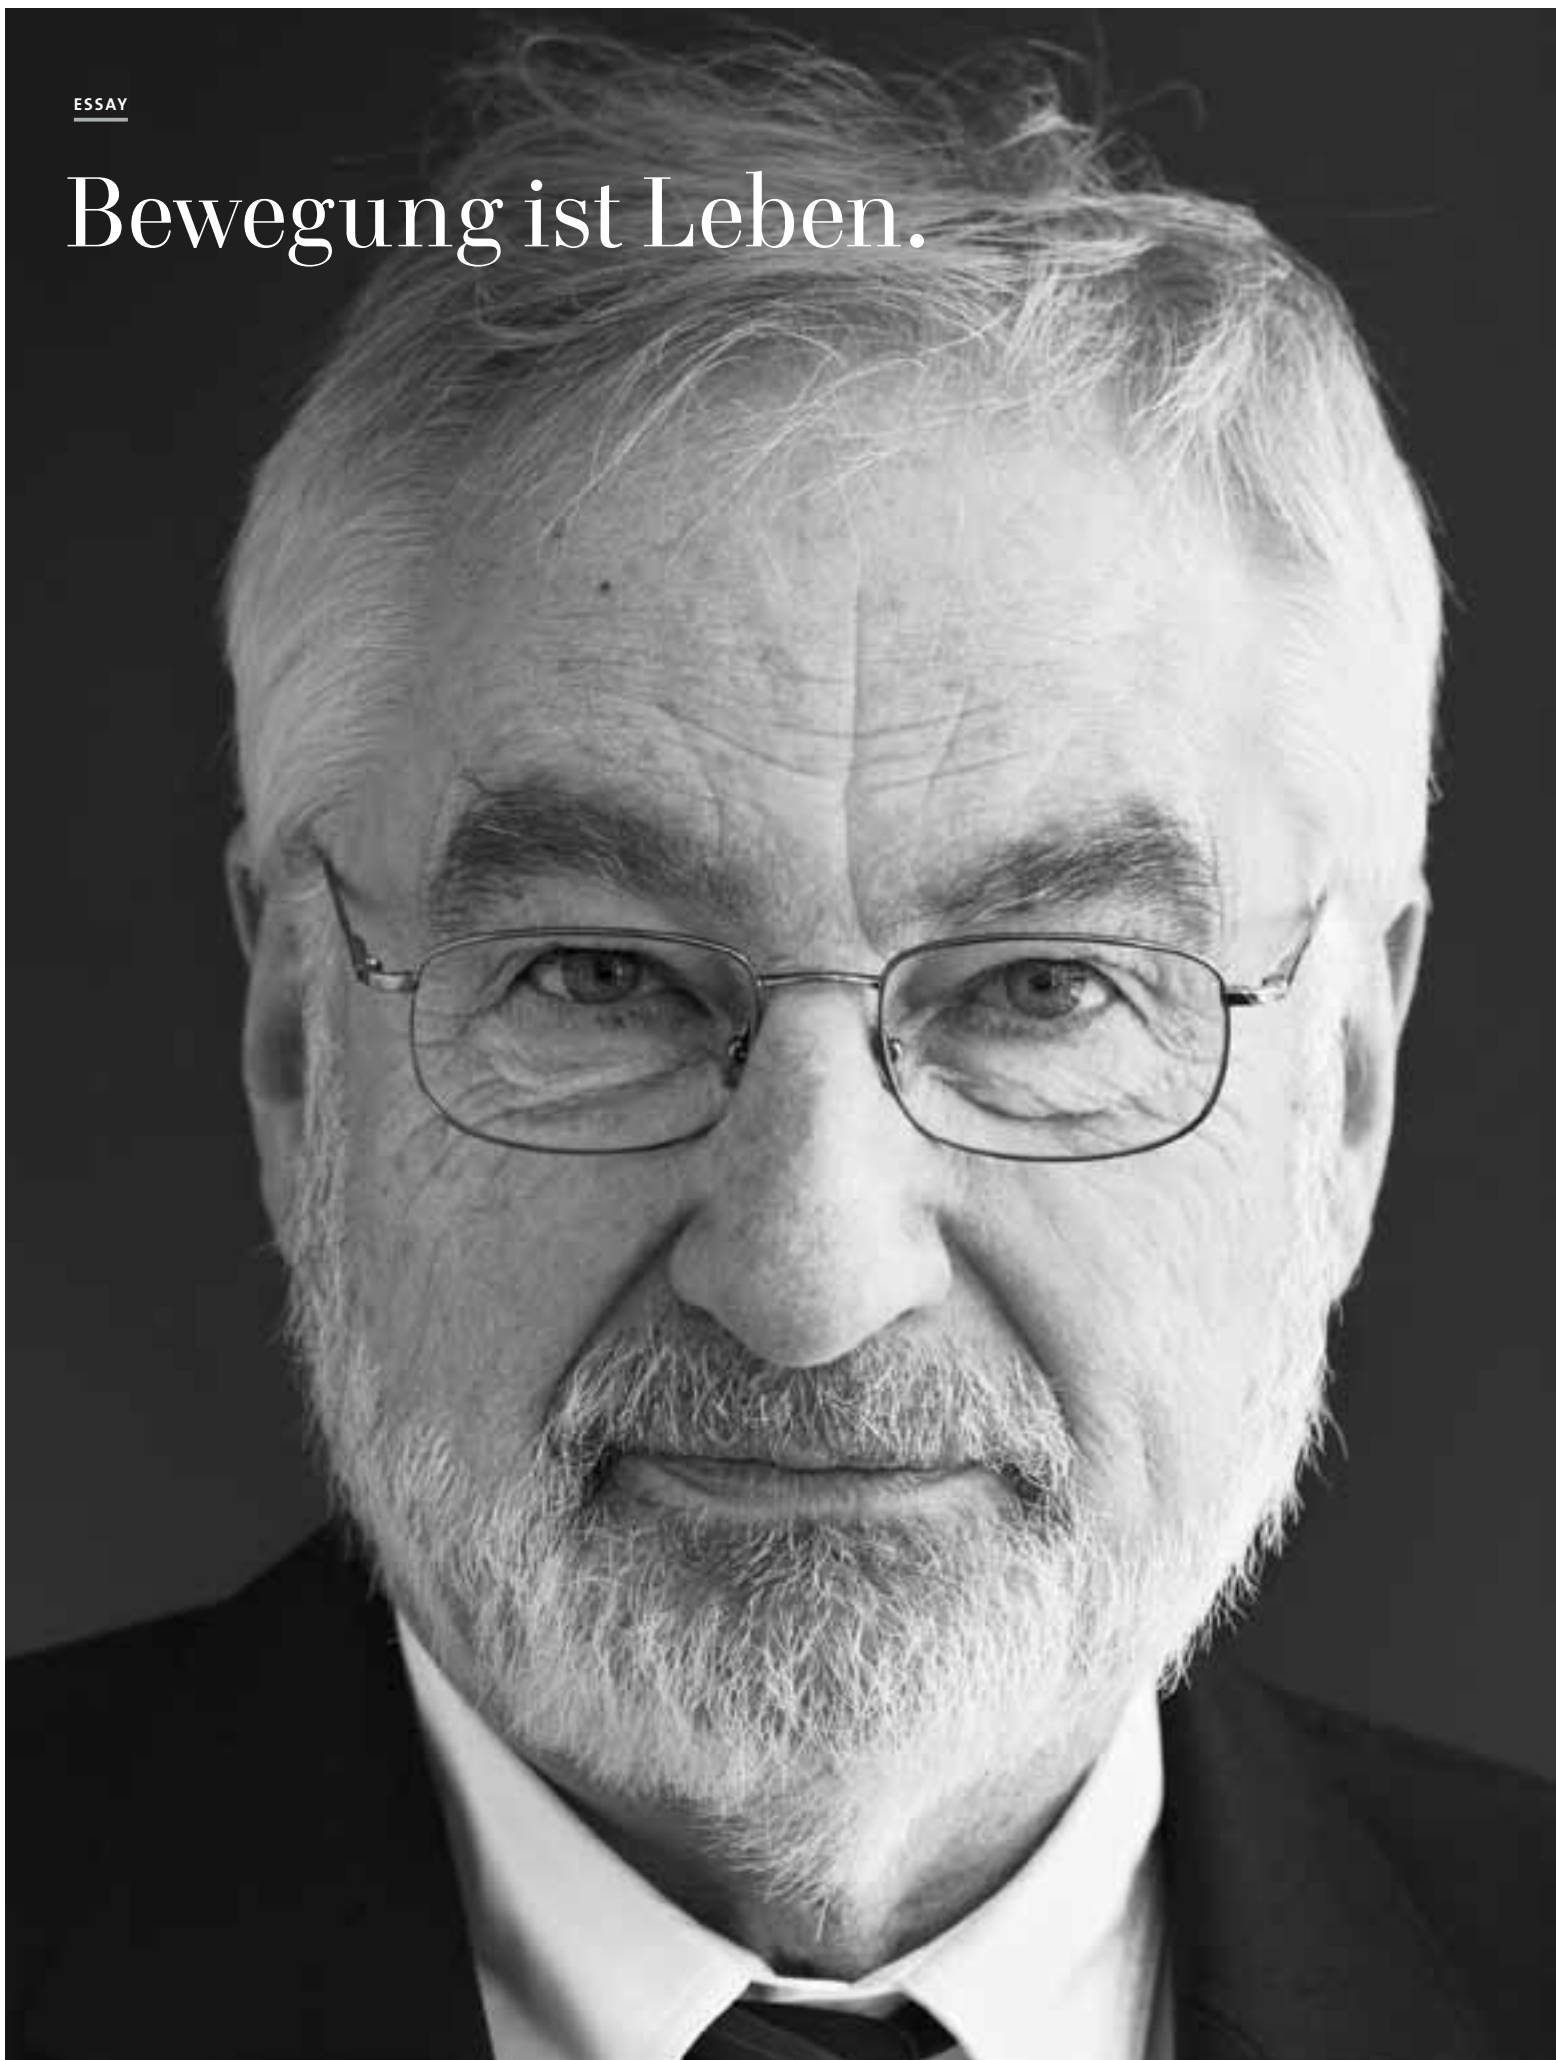



*Auto fahren ist Gehirn-Training!*

PROF. DR. ERNST PÖPPEL

Bewegung und Mobilität sind so alt wie der Mensch selbst. Allerdings ist die Mehrheit der Menschen heute zu einer sesshaften Lebensweise bestimmt. Aus evolutionären Gründen sollten Menschen jeden Tag zehn bis 20 Kilometer weit gehen. Bewegung hält gesund. Das gilt auch für das Gehirn, denn nichts ist so gut für das Denken und das Gedächtnis wie körperliche Bewegung. Heute ist Auto fahren die weltweit populärste Art der Fortbewegung. Aber Auto fahren ist noch mehr: Jede Fahrt bedingt einen permanenten Prozess des Abwägens und Entscheidens, also Hochleistungssport für das Gehirn. Es lässt sich wie ein Muskel durch Training in Form bringen – und das übrigens auch noch im Alter.

Auto fahren ist also Gehirn-High-Performance. Dabei sollten uns unsere Autos noch besser unterstützen. Ein Mensch kann in einem Augenblick – das sind zwei bis drei Sekunden – drei, maximal vier Sachverhalte aufnehmen. Werden mehr Sachverhalte für eine Entscheidung angeboten, ist der Mensch überfordert. Es ist wichtig, das bei der Gestaltung beispielsweise von Warn- und Fahrerassistenzsystemen zu beachten. Außerdem: Wir fahren antizipativ, das heißt, wir nehmen beim Auto fahren immer eine Situation vorweg – und zwar etwa im Drei-Sekunden-Rhythmus. Die Antizipation gilt es zukünftig noch stärker in die Entwicklungen einzubeziehen. Denn Ziel der Autoindustrie muss es sein, dass wir unser Fahrzeug in allen Facetten intuitiv verstehen, bedienen und nutzen können.

In der Hirnforschung werden Autos oder technische Geräte heute als Teil unserer selbst, als Teil unseres Körpers betrachtet. Die Wissenschaft spricht von „Embodiment“. Der Mensch lenkt also sein Auto, als wäre es ein Teil seines Körpers. Er verliert jedoch die Verbindung zu diesem „Körperteil“, wenn der Sichtkontakt fehlt. Nehmen wir eine Karosserie, bei der

man dank aerodynamischer Optimierung vom Fahrersitz aus Motorhaube und Kofferraumdeckel nicht mehr optimal einsehen kann. Das „Embodiment“ ist stark reduziert. Ein Auto ohne diese optischen Koordinaten verunsichert den Fahrer mehr als ein Auto, dessen Abmessungen er überblickt – trotz technischer Helfer wie Kameras: Weicht der Blickwinkel der Rückfahrkamera von dem des Fahrers ab, so führt auch das zur Reduzierung des „Embodiments“.

Das menschliche Gehirn verlangt letztlich nach Einfachheit und anstrengungsloser Informationsverarbeitung. Deshalb tut die Autoindustrie gut daran, wenn sie intensiv darüber nachdenkt, wie sie dem Menschen das komplexe System Auto näherbringt.

*Immer besser*

PROF. DR. ERNST PÖPPEL

zählt zu den renommiertesten Hirnforschern weltweit. Seit 1976 ist er Professor für Medizinische Psychologie an der Universität München (LMU). Er arbeitet zudem als Wissenschaftlicher Direktor am Parmenides-Center for the Study of Thinking und leitet das Generation Research Program des international engagierten Humanwissenschaftlichen Zentrums der LMU. Als Gastprofessor lehrt er in Innsbruck und Peking.

# Wesentliche Zahlen

## VOLKSWAGEN KONZERN

| Mengendaten <sup>1</sup>                                                    | 2010      | 2009      | %      |
|-----------------------------------------------------------------------------|-----------|-----------|--------|
| Absatz (Automobile)                                                         | 7.278.440 | 6.309.743 | + 15,4 |
| Produktion (Automobile)                                                     | 7.357.505 | 6.054.829 | + 21,5 |
| Belegschaft am 31.12.                                                       | 399.381   | 368.500   | + 8,4  |
| Finanzdaten nach IFRS in Mio. €                                             | 2010      | 2009      | %      |
| Umsatzerlöse                                                                | 126.875   | 105.187   | + 20,6 |
| Operatives Ergebnis                                                         | 7.141     | 1.855     | x      |
| Ergebnis vor Steuern                                                        | 8.994     | 1.261     | x      |
| Ergebnis nach Steuern                                                       | 7.226     | 911       | x      |
| Ergebnisanteil der Aktionäre der Volkswagen AG                              | 6.835     | 960       | x      |
| Cash-flow laufendes Geschäft                                                | 11.455    | 12.741    | - 10,1 |
| Investitionstätigkeit laufendes Geschäft                                    | 9.278     | 10.428    | - 11,0 |
| Konzernbereich Automobile <sup>2</sup>                                      |           |           |        |
| EBITDA <sup>3</sup>                                                         | 13.940    | 8.005     | + 74,1 |
| Cash-flow laufendes Geschäft                                                | 13.930    | 12.815    | + 8,7  |
| Investitionstätigkeit laufendes Geschäft <sup>4</sup>                       | 9.095     | 10.252    | - 11,3 |
| davon: Sachinvestitionen                                                    | 5.656     | 5.783     | - 2,2  |
| in % der Umsatzerlöse                                                       | 5,0       | 6,2       |        |
| Entwicklungskosten (aktiviert)                                              | 1.667     | 1.948     | - 14,4 |
| in % der Umsatzerlöse                                                       | 1,5       | 2,1       |        |
| Netto-Cash-flow                                                             | 4.835     | 2.563     | + 88,6 |
| Netto-Liquidität am 31.12.                                                  | 18.639    | 10.636    | + 75,2 |
| Renditen in %                                                               | 2010      | 2009      |        |
| Umsatzrendite vor Steuern                                                   | 7,1       | 1,2       |        |
| Kapitalrendite nach Steuern (Automobilbereich)                              | 13,5      | 3,8       |        |
| Eigenkapitalrendite vor Steuern (Finanzdienstleistungsbereich) <sup>5</sup> | 12,9      | 7,9       |        |

1 Mengendaten inklusive der nicht vollkonsolidierten chinesischen Gemeinschaftsunternehmen. Belegschaft 2009 ohne chinesische Komponentenwerke.

2 Inklusive Zuordnung der Konsolidierung zwischen den Konzernbereichen Automobile und Finanzdienstleistungen.

3 Operatives Ergebnis zuzüglich des Saldos aus Zu- / Abschreibungen auf Sachanlagen, aktivierte Entwicklungskosten, Vermietvermögen, Goodwill und Finanzanlagen gemäß Kapitalflussrechnung.

4 Ohne Erwerb und Verkauf von Beteiligungen: 7.034 (7.585) Mio. €.

5 Ergebnis vor Steuern in Prozent des durchschnittlichen Eigenkapitals.

## VOLKSWAGEN AG

| Mengendaten                    | 2010      | 2009      | %      |
|--------------------------------|-----------|-----------|--------|
| Absatz (Automobile)            | 2.309.648 | 2.053.427 | + 12,5 |
| Produktion (Automobile)        | 1.100.186 | 1.038.344 | + 6,0  |
| Belegschaft am 31.12.          | 94.787    | 95.164    | - 0,4  |
| Finanzdaten nach HGB in Mio. € | 2010      | 2009      | %      |
| Umsatzerlöse                   | 57.243    | 47.864    | + 19,6 |
| Jahresüberschuss               | 1.550     | 1.082     | + 43,3 |
| Dividende (€)                  |           |           |        |
| je Stammaktie                  | 2,20      | 1,60      |        |
| je Vorzugsaktie                | 2,26      | 1,66      |        |



# Märkte in Bewegung

AUSLIEFERUNGEN AUF WESENTLICHEN MÄRKTEN – IN TSD. FZG.

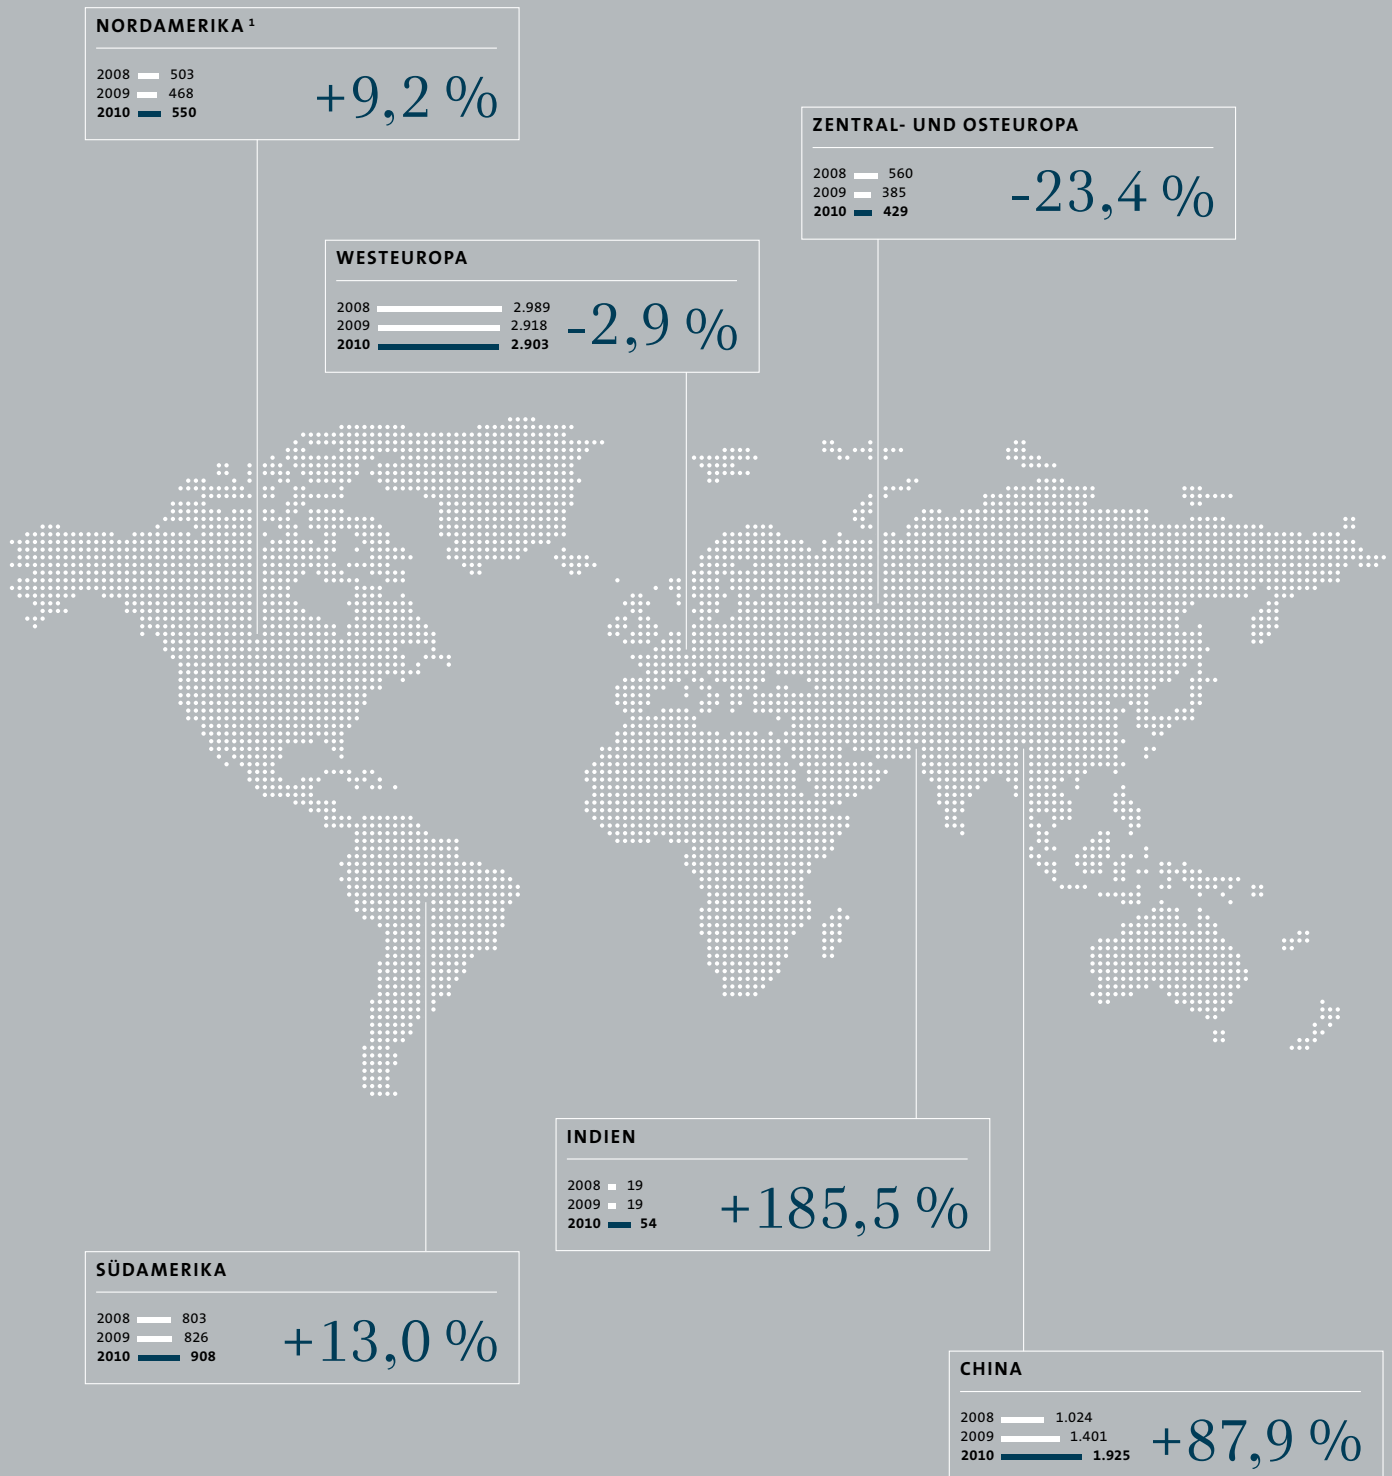

<sup>1</sup> Gesamtmarkt enthält Pkw und leichte Nutzfahrzeuge.

Think.

Think Blue.

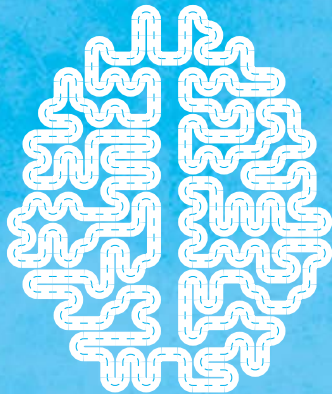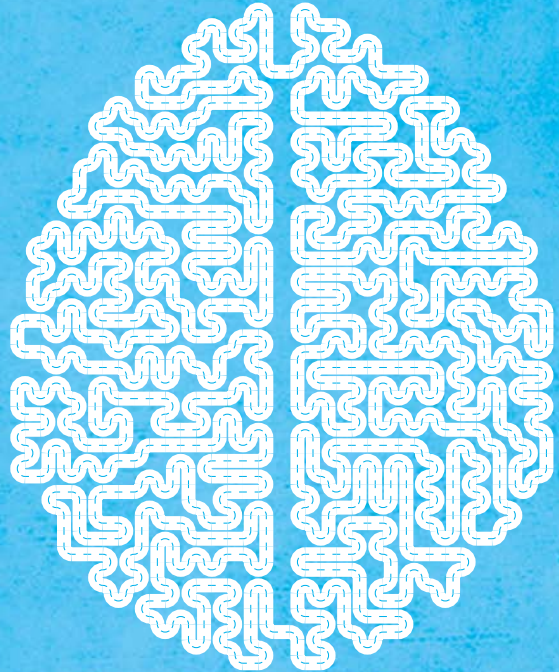

## Think Blue: Mit 2456,88 km sichert sich der Passat BlueMotion\* den Reichweiten-Weltrekord\*\*.

Effizienter kann man nicht gewinnen: ein neuer GUINNESS WORLD RECORD™ geht an den Journalisten Gavin Conway und den Passat BlueMotion\*. Gemeinsam legten sie die Rekordstrecke von genau 2456,88 km mit nur einer Tankfüllung und einem Durchschnittsverbrauch von gerade mal 3,14 l/100 km zurück. Wir gratulieren allen Beteiligten zum Weltrekord. Mehr Informationen rund um „Think Blue“ unter [www.volkswagen.de/thinkblue](http://www.volkswagen.de/thinkblue).

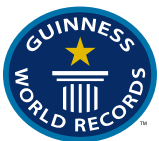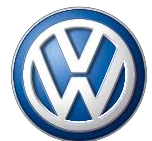

Das Auto.

\*Dieser Weltrekord wurde in einem Passat BlueMotion (Modelljahr 2010) aufgestellt, 1,6-l-TDI, 77 kW (105 PS), Dieselpartikelfilter, Kraftstoffverbrauch, l/100 km, innerorts 5,4/außerorts 3,8/kombiniert 4,4; CO<sub>2</sub>-Emission, kombiniert 114 g/km. Gemäß RL 1999/100/EG, abhängig von Fahrweise, Straßen- und Verkehrsverhältnissen. Guinness World Records is a trademark of Guinness World Records Limited. All rights reserved. \*\*[www.guinnessworldrecords.com](http://www.guinnessworldrecords.com)
