# Supplementary material
Source: publisher site journal article supplement (https://www.degruyterbrill.com/publication/isbn/9783110432879/downloadAsset/9783110432879_Elektronischer_Anhang_2.zip)
Supplement: Supplementary file 95 [file VW Konzertleitlinien.pdf › Korpustexte/Korpustexte pdf/VW/VW Konzertleitlinien.pdf]

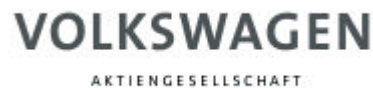

---

## Konzernleitlinien

### **Persönliche Werte und Konzernwerte**

Unsere persönlichen Werte sind grundlegende Überzeugungen und Einstellungen zum Leben, die unser Denken und Handeln bestimmen. Unsere Werte liefern die Basis für unsere Motivation und unsere Entscheidungen.

Genauso ist es mit den Werten von Volkswagen, unseren Konzernwerten. Sind sie einmal fest verankert in unseren Köpfen und Herzen, werden sie neben unseren persönlichen Werten unser Verhalten und unsere Entscheidungen prägen.

Unsere Konzernwerte sind ebenso wie die persönlichen Werte abstrakt. Der Vorteil abstrakter Werte ist ihre Übertragbarkeit auf die verschiedensten Situationen und Bereiche, wie es sie in einem so großen Unternehmen wie der Volkswagen AG gibt. Jeder Mitarbeiter setzt die Werte anders um. Die Richtung aber bleibt die Gleiche. Und das ist das Wichtige: Der gemeinsame Weg!

Volkswagen hat für sich 7 Werte definiert:

- Kundennähe
- Höchstleistung
- Werte schaffen
- Erneuerungsfähigkeit
- Respekt
- Verantwortung
- Nachhaltigkeit
