# Supplementary material
Source: publisher site journal article supplement (https://www.degruyterbrill.com/publication/isbn/9783110432879/downloadAsset/9783110432879_Elektronischer_Anhang_2.zip)
Supplement: Supplementary file 96 [file VW Nachhaltigkeitsleitbild.pdf › Korpustexte/Korpustexte pdf/VW/VW Nachhaltigkeitsleitbild.pdf]

# Nachhaltigkeitsleitbild

Anlässlich des Weltgipfels in Johannesburg im Jahr 2002 haben wir in unserer Erklärung zum Global Compact ein Leitbild der nachhaltigen Entwicklung formuliert:

- Für Volkswagen ist das Leitbild der nachhaltigen Entwicklung der Maßstab einer langfristig orientierten Unternehmenspolitik, die sich nicht nur ökonomischen, sondern zugleich auch ökologischen und sozialen Herausforderungen stellt.
- Ökonomischer Erfolg, vorausschauender Umweltschutz und soziale Kompetenz sichern und steigern die globale Wettbewerbsfähigkeit des Volkswagen Konzerns.
- Der Volkswagen Konzern entwickelt, produziert und vermarktet weltweit Automobile und Dienstleistungen, um seinen Kunden mit attraktiven Lösungen Zugang zu individueller Mobilität zu verschaffen.
- Es ist das Ziel von Volkswagen, fortschrittliche Technologie unter Berücksichtigung umweltschonender und sozialverträglicher Aspekte weltweit verfügbar zu machen.
- Neben dem wirtschaftlichen Erfolg sind für Volkswagen die kontinuierliche Verbesserung der Umweltverträglichkeit seiner Produkte und die Verringerung des Verbrauchs natürlicher Ressourcen wichtige Ziele der Unternehmenspolitik.
- Volkswagen ist ein Unternehmen mit deutschen Wurzeln, europäischen Werten und globaler Verantwortung. Die Rechte, die persönliche Entwicklung, die soziale Absicherung und die wirtschaftliche Teilhabe der Mitarbeiter sind zentrale Bestandteile der Unternehmenspolitik von Volkswagen.
- Eine Kultur der Kooperation und Partnerschaft ist Basis der erfolgreichen Zusammenarbeit zwischen der Unternehmensleitung und der Arbeitnehmervertretung in Deutschland, in Europa und weltweit.
- Die Globalisierung ist für Volkswagen ein entscheidender Faktor zur Sicherung der internationalen Wettbewerbsfähigkeit und Zukunftssicherung des Unternehmens. Die Globalisierung umwelt- und sozialverträglich zu gestalten, ist Aufgabe einer modernen und verantwortungsbewussten Unternehmenspolitik. Diese dient den langfristigen Interessen der Kunden, der Anteilseigner, der Mitarbeiter und der Partner von Volkswagen. Globalisierung darf nicht auf Ausbeutung beruhen.
- Volkswagen setzt sich auch gegenüber seinen Zulieferern für eine umwelt- und sozialverträgliche Wirtschaftsweise ein.
- Volkswagen versteht sich an allen Standorten als Partner von Gesellschaft und Politik.
